# Supplementary material for: Detecting adaptive changes in gene copy number distribution accompanying the human out-of-Africa expansion
Source: PubMed Central journal article supplement (PMC11420239; doi:10.1038/s41439-024-00293-w), 2024-09-23

## Supplementary tables and figures

### „Detecting adaptive changes in gene copy number distribution accompanying the human out-of-Africa expansion“ by Otto et al.

#### Suppl. 1:

Table S1: List of gene families from Brahmachary *et al.* (2014) and description of filtering procedure. After filtering, 42 gene families were chosen for further analysis

#### Suppl. 2:

Table S2: Positions in genome assembly hg38 of gene copies from 33 MANE (Morales *et al.* 2022) selected gene families. Note: this is a subset of the 42 gene families which remained after filtering (Table S1).

#### Suppl. 3:

Tajima's *D* profiles.

Tajima's *D* was calculated in a 1 Mb region centered in the respective gene family (positions from Suppl. Table S2) in sliding windows of size 10 kb and based on SNPs from the 1k human genomes project phase III (<http://ftp.1000genomes.ebi.ac.uk/vol1/ftp/release/20130502/>)

(Raw data shown in separate file "TajD-raw.pdf")

#### Suppl. 4 and 5:

Introgression profiles for (a) individual gene families and (b) summed over all gene families. Introgression in gene families was calculated as the total number of introgressed SNPs in a 10Mb window centered in the respective gene family and in sliding windows of size 100 kb. Introgression data from Browning *et al.* (2018).

(Raw data shown in separate file "introgression-raw.pdf")

**Table S1** List of all gene families from [Brahmachary et al. \(2014\)](#). We applied three levels of filtering: first (comment in gray), we excluded microsatellites and all genes which are sex-chromosome linked. Second (comment in orange), we excluded gene families which displayed either very little variation (mean copy number in YRI is less than 5 copies; one or more individuals in CEU or CHB have only one copy; coefficient of variation smaller than 0.004) or which are extremely large (mean copy number in YRI larger than 60). Third (comment in red), gene families were excluded for which neither the *t*-test nor the *F*-test between YRI and CEU or CHB turned out to be significant ('homogeneous'). The remaining families (green checkmark) were investigated further.

| Gene Name      | Filtering     | Gene Name    | Filtering      | Gene Name        | Filtering            |
|----------------|---------------|--------------|----------------|------------------|----------------------|
| AMY1A          | ✓             | GSTM         | <5 copies      | NXF2             | sex-linked           |
| ANAPC11        | min copies <2 | GSTT2        | min copies <2  | OPN1MW           | sex-linked           |
| ANKRD20A3      | ✓             | GTF2H2C      | <5 copies      | ORM1             | <5 copies            |
| ANXA8L1        | <5 copies     | GTPBP6       | sex-linked     | P4HB             | min copies <2        |
| AREG           | min copies <2 | GUSBP1       | ✓              | PCYT2            | min copies <2        |
| ARL17B         | <5 copies     | H2AFB1       | sex-linked     | PGA3             | ✓                    |
| ATG4B          | min copies <2 | HGD          | min copies <2  | PGAM4            | sex-linked           |
| AURKAIP1       | min copies <2 | HIST2        | ✓              | PLGLB2           | low CV               |
| BOLA2B         | ✓             | HP           | min copies <2  | PPIAP21          | ✓                    |
| BPY2           | sex-linked    | HRNR         | min copies <2  | PRAMEF14         | ✓                    |
| BTNL8          | min copies <2 | HSFY2        | sex-linked     | PRAMEF20         | ✓                    |
| C16orf54       | min copies <2 | KIF22        | min copies <2  | PRAMEF5          | ✓                    |
| C4B            | <5 copies     | KIR2DL2      | homogeneous    | PRAMEF8          | ✓                    |
| C6orf124       | min copies <2 | KIR2DL4      | min copies <2  | PRR11            | ✓                    |
| CBWD3          | ✓             | KIR2DL5A     | homogeneous    | PRR20A           | ✓                    |
| CCL3           | min copies <2 | KIR2DS2      | homogeneous    | PRR20A (probe2)  | excluded (duplicate) |
| CCL4           | min copies <2 | KIR3DP1      | min copies <2  | PRY2             | sex-linked           |
| CCR2           | min copies <2 | KLRC2        | <5 copies      | PSG11            | sex-linked           |
| CCR5           | min copies <2 | KPNA2        | <5 copies      | PSG3             | ✓                    |
| CCRL2          | min copies <2 | KRT39        | min copies <2  | PTPN20A          | <5 copies            |
| CDC37P1        | ✓             | KRT40        | min copies <2  | PYCR1            | min copies <2        |
| CDY1B          | sex-linked    | KRTAP1-1     | min copies <2  | RBMY1E           | sex-linked           |
| CFC1           | <5 copies     | KRTAP2-1     | min copies <2  | REXO1L1          | >60 copies           |
| CKMT1A         | <5 copies     | KRTAP3-1     | min copies <2  | REXO1L1 (probe2) | >60 copies           |
| CLEC18A        | ✓             | KRTAP4-1     | min copies <2  | RGPD1            | ✓                    |
| CR1            | <5 copies     | KRTAP5-1     | min copies <2  | RGPD6            | low CV               |
| CRLF2          | sex-linked    | KRTAP7-1     | min copies <2  | RHOXF2           | sex-linked           |
| CSAG2          | sex-linked    | KRTAP8-1     | min copies <2  | RPS17            | <5 copies            |
| CSH            | ✓             | KRTAP9-1     | <5 copies      | RSPH10B          | <5 copies            |
| CT45           | sex-linked    | LCE2         | <5 copies      | SCRT1            | min copies <2        |
| CT47 (probe 1) | sex-linked    | LIMS3        | ✓              | SCXB             | min copies <2        |
| CT47 (probe 2) | sex-linked    | LOC100506776 | min copies <2  | SERF1B           | min copies <2        |
| CTAG1B         | sex-linked    | LOC23117     | ✓              | SFTPA1           | <5 copies            |
| D2HGDH         | min copies <2 | LOC389852    | sex-linked     | SIRT7            | min copies <2        |
| DAZ1           | sex-linked    | LOC653606    | ✓              | SLX1B            | homogeneous          |
| DEFA1          | ✓             | LOC727800    | min copies <2  | SMN2             | min copies <2        |
| DEFB103A       | min copies <2 | LOC728932    | <5 copies      | SNAR-A1          | homogeneous          |
| DEFB104A       | <5 copies     | LPA          | <5 copies      | SPAG11           | min copies <2        |
| DEFB105A       | min copies <2 | MAFG         | <5 copies      | SPANXA1          | sex-linked           |
| DEFB106A       | min copies <2 | MAGEA2       | sex-linked     | SPDYE3           | ✓                    |
| DEFB107A       | min copies <2 | MAGEA9       | sex-linked     | SSX4             | sex-linked           |
| DEFB130        | ✓             | MGC59937     | min copies <2  | SULT1A1          | min copies <2        |
| DGAT1          | min copies <2 | MRC1         | min copies <2  | SULT1A3          | ✓                    |
| DHRS4          | <5 copies     | MSat1        | microsatellite | TAF9B            | sex-linked           |
| DMRTC1         | sex-linked    | MSat10       | microsatellite | TAS1R3           | min copies <2        |
| DTYMK          | min copies <2 | MSat11       | microsatellite | TBC1D3           | ✓                    |
| DUX4           | >60 copies    | MSat12       | microsatellite | TBC1D3 (probe2)  | excluded (duplicate) |
| EIF3C          | <5 copies     | MSat13       | microsatellite | TCEB3C           | ✓                    |
| ELA            | <5 copies     | MSat14       | microsatellite | THAP4            | min copies <2        |
| F8A2           | sex-linked    | MSat15       | microsatellite | TMEM106A         | min copies <2        |
| FAM156A        | sex-linked    | MSat2        | microsatellite | TMEM167B         | min copies <2        |
| FAM203A        | min copies <2 | MSat5        | microsatellite | TMPRSS11E        | min copies <2        |
| FAM21B         | <5 copies     | MSat6        | microsatellite | TP53TG3          | ✓                    |
| FAM23A         | min copies <2 | MSat7        | microsatellite | TRIM49L1         | ✓                    |
| FAM72A         | ✓             | MSat8        | microsatellite | TSPY4            | sex-linked           |
| FAM75A1        | ✓             | MSat9        | microsatellite | UGT2B15          | min copies <2        |
| FAM75A5        | ✓             | MUC12        | ✓              | USP17            | >60 copies           |
| FAM90A         | >60 copies    | MUC5AC       | min copies <2  | XAGE1            | sex-linked           |
| FCGBP          | ✓             | NBPF10       | >60 copies     | XAGE2            | sex-linked           |
| FCGR           | min copies <2 | NBPF11       | ✓              | XKRY2            | sex-linked           |
| FOXD4L2        | ✓             | NBPF16       | ✓              | ZFP62            | min copies <2        |
| FUSIP1         | <5 copies     | NDUFB4       | min copies <2  | ZG16             | min copies <2        |
| GAGE6          | sex-linked    | NEB          | min copies <2  | ZNF658B          | ✓                    |
| GOLGA6L9       | ✓             | NPB          | min copies <2  |                  |                      |
| GOLGA8G        | ✓             | NPIP         | ✓              |                  |                      |

**Table S2:** Positions of genes in hg38

| Gene     | Chromosome | Start     | End       |
|----------|------------|-----------|-----------|
| AMY1A    | chr1       | 103655519 | 103664554 |
| BOLA2B   | chr16      | 29453588  | 29454964  |
| BOLA2B   | chr16      | 30192932  | 30193666  |
| CBWD3    | chr9       | 65666374  | 65734041  |
| CBWD3    | chr9       | 68241866  | 68300035  |
| CLEC18A  | chr16      | 69950232  | 69968478  |
| CSH      | chr7       | 123763708 | 123877481 |
| CSH      | chr16      | 81081945  | 81096395  |
| CSH      | chr17      | 18327873  | 18363560  |
| CSH      | chr17      | 63872012  | 63873729  |
| CSH      | chr17      | 63894918  | 63896574  |
| CSH      | chr17      | 63909602  | 63911280  |
| CSH      | chr19      | 11435290  | 11450968  |
| CSH      | chr19      | 58498333  | 58512028  |
| DEFA1    | chr8       | 6977649   | 6980120   |
| DEFA1    | chr8       | 6996766   | 6999198   |
| DEFB130  | chr8       | 12064389  | 12071747  |
| DEFB130  | chr8       | 12310962  | 12318316  |
| FAM72A   | chr1       | 206186179 | 206205773 |
| FAM75A1  | chr9       | 39355667  | 39361962  |
| FAM75A5  | chr9       | 60914372  | 60920653  |
| FOXD4L2  | chr9       | 65737146  | 65738396  |
| FOXD4L2  | chr9       | 68302867  | 68305084  |
| GOLGA6L9 | chr15      | 82429363  | 82439153  |
| GOLGA8G  | chr15      | 28519611  | 28533014  |
| HIST2    | chr1       | 143902386 | 143905977 |
| HIST2    | chr1       | 149782689 | 149812370 |
| HIST2    | chr1       | 149813225 | 149813693 |
| HIST2    | chr1       | 149832657 | 149833052 |
| HIST2    | chr1       | 149840687 | 149841208 |
| HIST2    | chr1       | 149842218 | 149842750 |
| HIST2    | chr1       | 149851061 | 149851594 |
| HIST2    | chr1       | 149852608 | 149853125 |
| HIST2    | chr1       | 149853262 | 149861159 |
| HIST2    | chr1       | 149884459 | 149886682 |
| HIST2    | chr1       | 149886918 | 149887411 |
| HIST2    | chr1       | 149887469 | 149887965 |

|          |       |           |           |
|----------|-------|-----------|-----------|
| LIMS3    | chr2  | 109898688 | 109925625 |
| LIMS3    | chr2  | 110386341 | 110473075 |
| MUC12    | chr7  | 100969565 | 101018936 |
| NBPF11   | chr1  | 148102151 | 148152281 |
| NBPF16   | chr1  | 144421390 | 144461669 |
| NPIP     | chr1  | 44221070  | 44355298  |
| NPIP     | chr16 | 11927263  | 11976643  |
| NPIP     | chr16 | 14703411  | 14726342  |
| NPIP     | chr16 | 14742533  | 14765462  |
| NPIP     | chr16 | 14937443  | 14952056  |
| NPIP     | chr16 | 15363613  | 15381467  |
| NPIP     | chr16 | 16379140  | 16393972  |
| NPIP     | chr16 | 18317919  | 18336736  |
| NPIP     | chr16 | 21834568  | 21857756  |
| NPIP     | chr16 | 22503599  | 22536535  |
| NPIP     | chr16 | 28342517  | 28364780  |
| NPIP     | chr16 | 28456329  | 28472336  |
| NPIP     | chr16 | 28637891  | 28658744  |
| NPIP     | chr16 | 29381310  | 29406711  |
| NPIP     | chr16 | 30222897  | 30248479  |
| NPIP     | chr16 | 74374986  | 74392115  |
| PGA3     | chr11 | 61203515  | 61213098  |
| PRAMEF14 | chr1  | 13341892  | 13347134  |
| PRAMEF20 | chr1  | 13410450  | 13421328  |
| PRAMEF5  | chr1  | 13254198  | 13263435  |
| PRAMEF8  | chr1  | 13281223  | 13285137  |
| PRR11    | chr17 | 59155355  | 59206709  |
| PRR20A   | chr13 | 57140918  | 57143939  |
| PRR20A   | chr13 | 57147488  | 57150509  |
| PRR20A   | chr13 | 57154061  | 57157082  |
| PRR20A   | chr13 | 57160632  | 57163653  |
| PRR20A   | chr13 | 57167197  | 57170218  |
| PSG3     | chr19 | 42721642  | 42740486  |
| RGPD1    | chr2  | 86913577  | 87013976  |
| SPDYE3   | chr7  | 100306798 | 100322196 |
| SULT1A3  | chr16 | 30199255  | 30204310  |
| TBC1D3   | chr6  | 121079494 | 121335384 |
| TBC1D3   | chr8  | 123041961 | 123165173 |
| TBC1D3   | chr12 | 64759484  | 64881033  |
| TBC1D3   | chr17 | 36165683  | 36176636  |

|          |       |          |          |
|----------|-------|----------|----------|
| TBC1D3   | chr17 | 36253639 | 36264601 |
| TBC1D3   | chr17 | 36322242 | 36334759 |
| TBC1D3   | chr17 | 36377531 | 36388452 |
| TBC1D3   | chr17 | 37923805 | 37935371 |
| TBC1D3   | chr17 | 37978155 | 37989060 |
| TBC1D3   | chr17 | 38003976 | 38014908 |
| TBC1D3   | chr17 | 38057693 | 38068634 |
| TBC1D3   | chr17 | 38118408 | 38138868 |
| TBC1D3   | chr17 | 38181659 | 38192555 |
| TP53TG3  | chr16 | 32251603 | 32255928 |
| TP53TG3  | chr16 | 32673528 | 32676165 |
| TP53TG3  | chr16 | 33191770 | 33196858 |
| TP53TG3  | chr16 | 33301850 | 33306945 |
| TP53TG3  | chr16 | 33360841 | 33363478 |
| TP53TG3  | chr16 | 33457156 | 33462249 |
| TRIM49L1 | chr11 | 89924064 | 89933063 |

1 CEU AMY1A

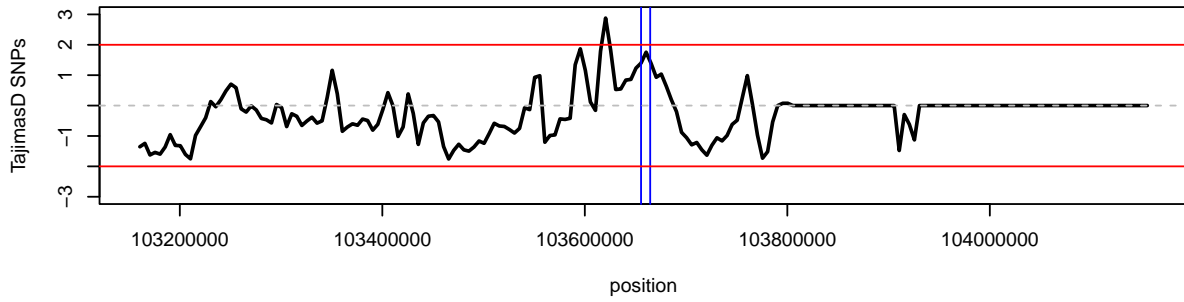

1 CHB AMY1A

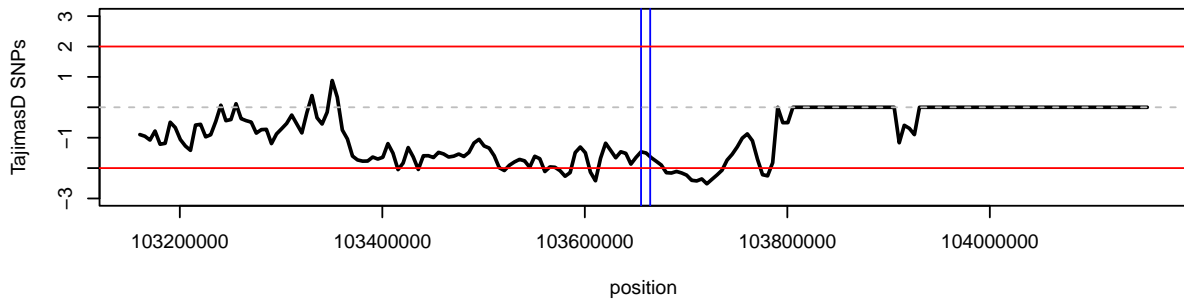

1 YRI AMY1A

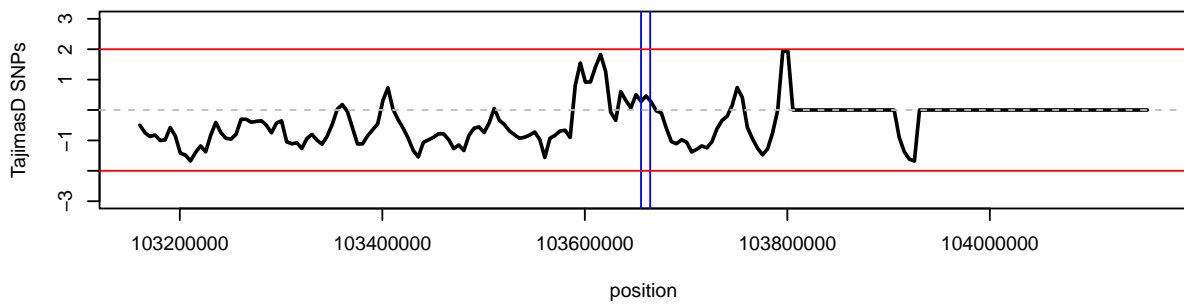

**2 CEU BOLA2B**

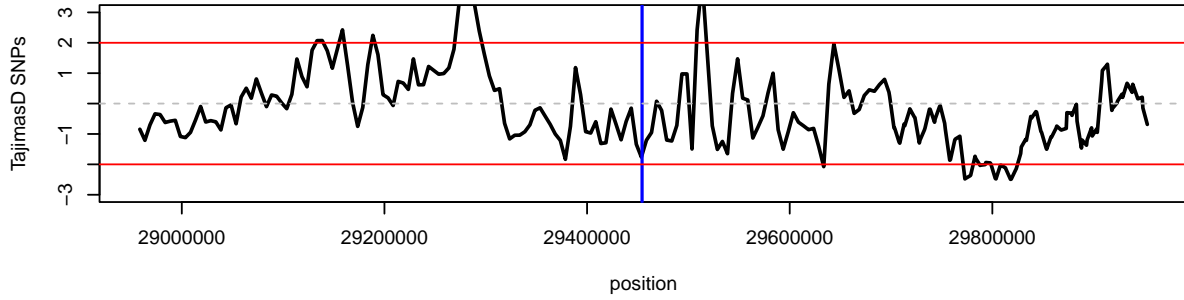

**2 CHB BOLA2B**

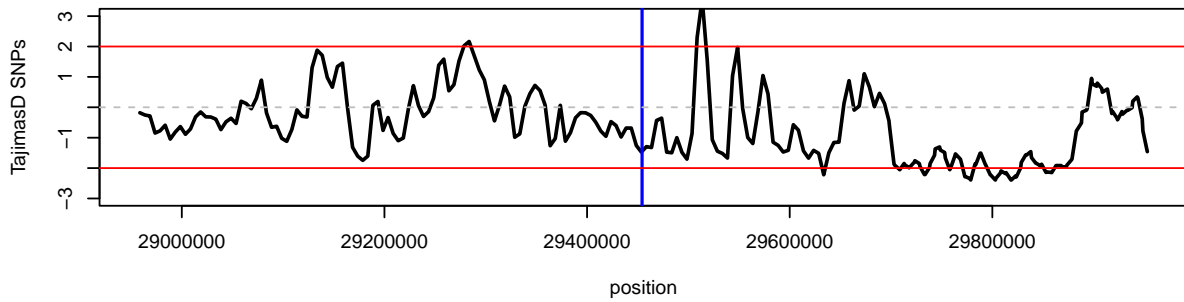

**2 YRI BOLA2B**

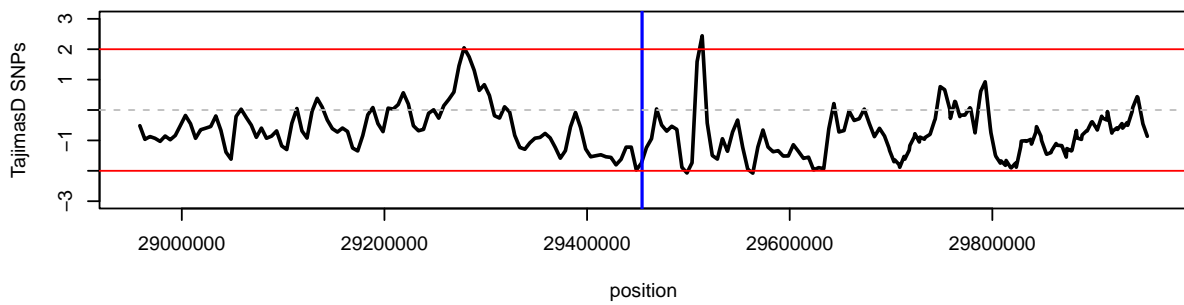

**3 CEU BOLA2B**

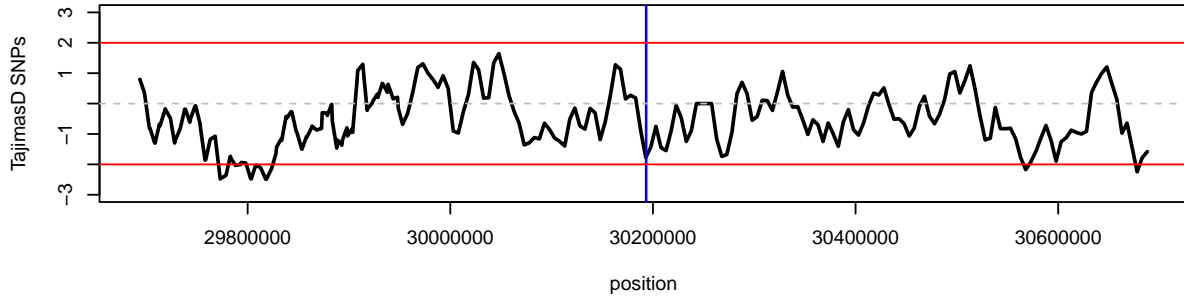

**3 CHB BOLA2B**

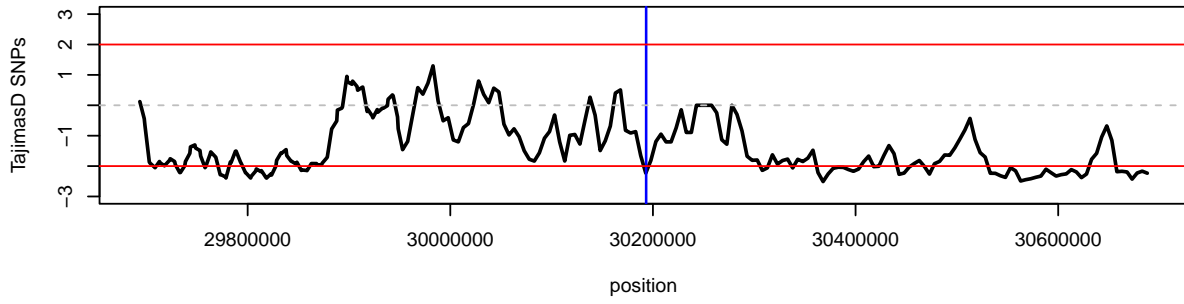

**3 YRI BOLA2B**

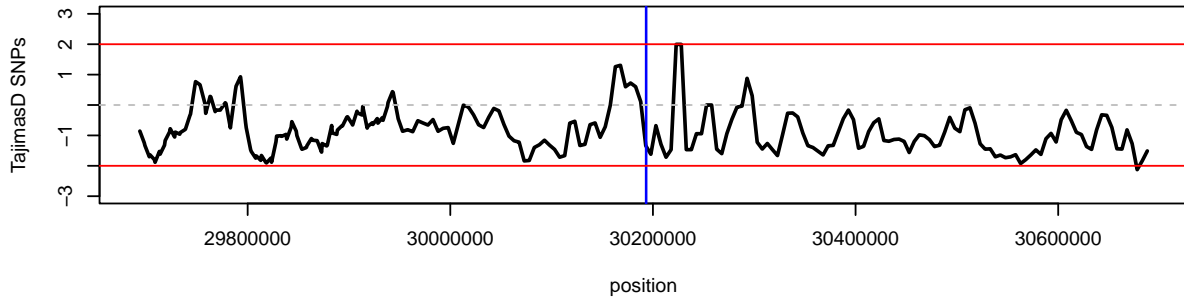



4 CEU CBWD3

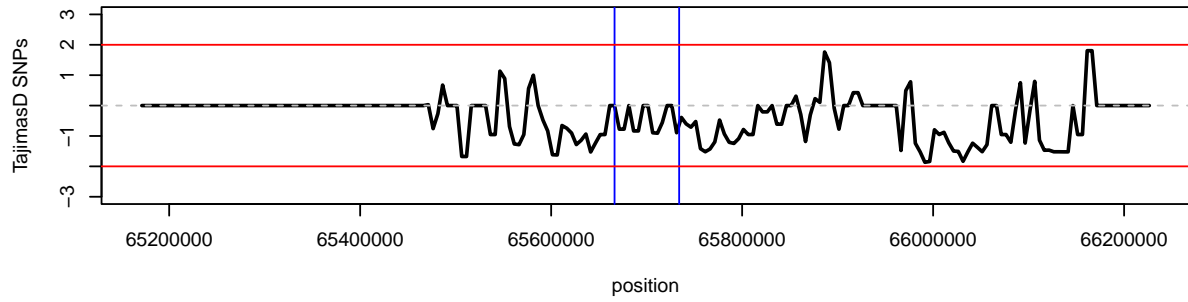

4 CHB CBWD3

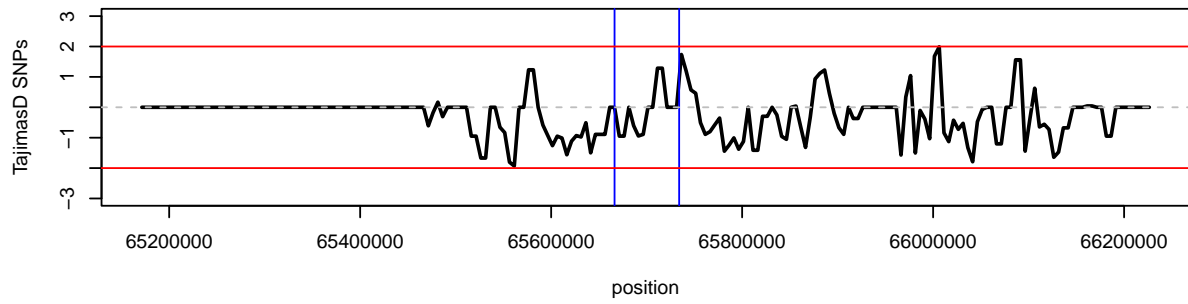

4 YRI CBWD3

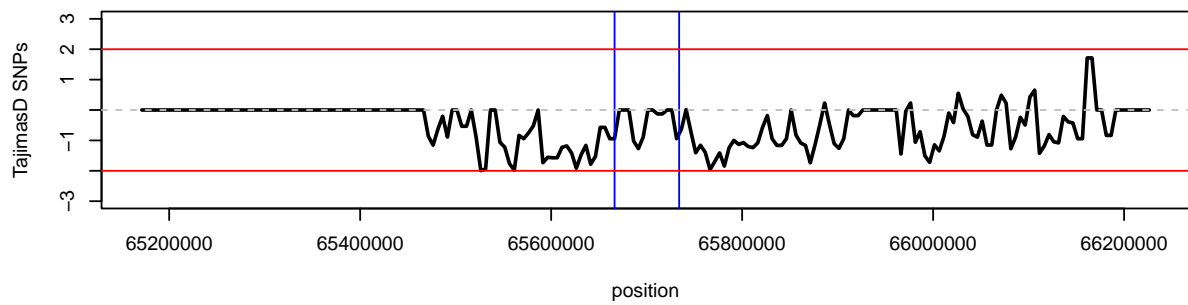

**5 CEU CBWD3**

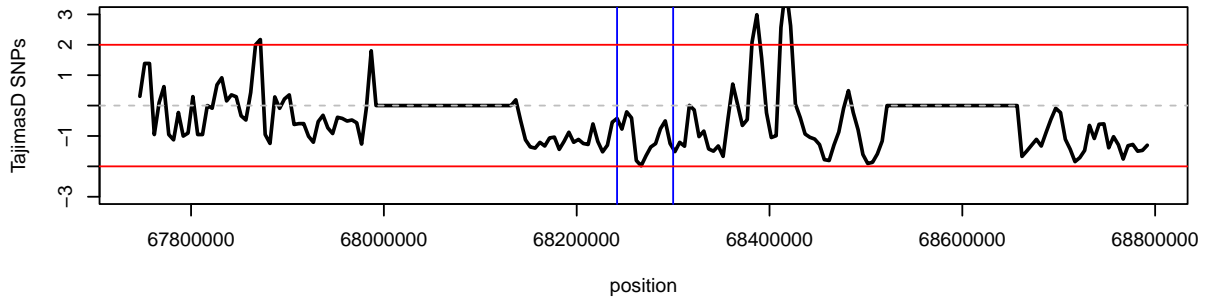

**5 CHB CBWD3**

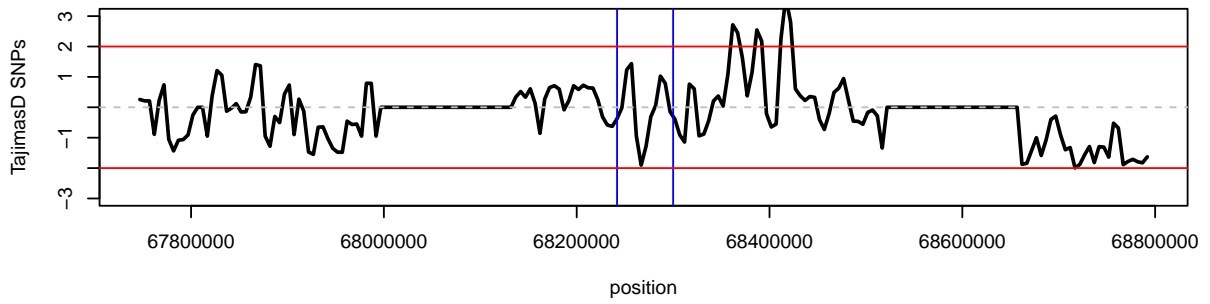

**5 YRI CBWD3**

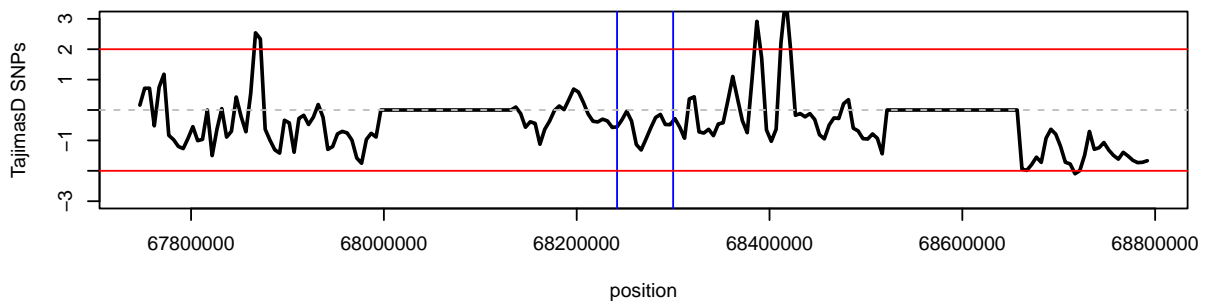

**6 CEU CLEC18A**

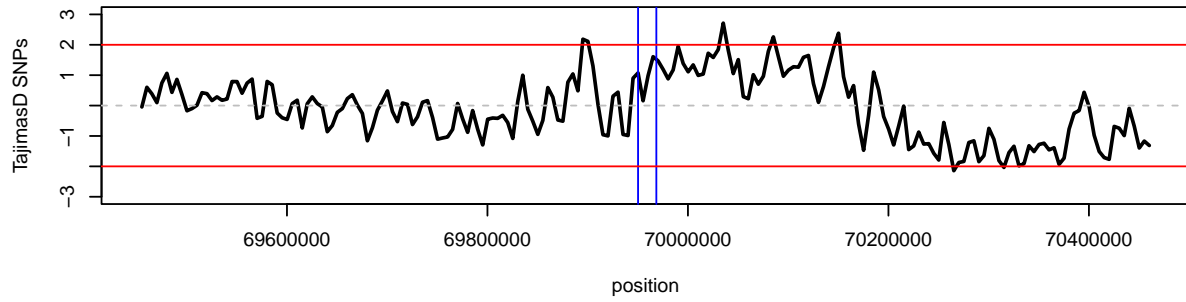

**6 CHB CLEC18A**

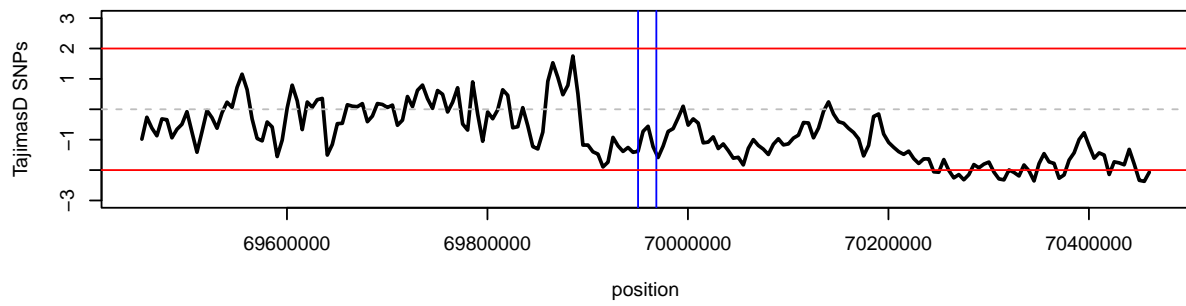

**6 YRI CLEC18A**

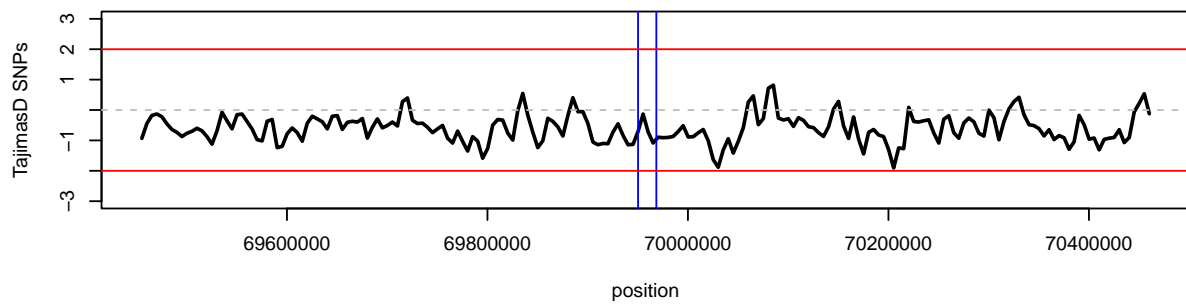

**7 CEU CSH**

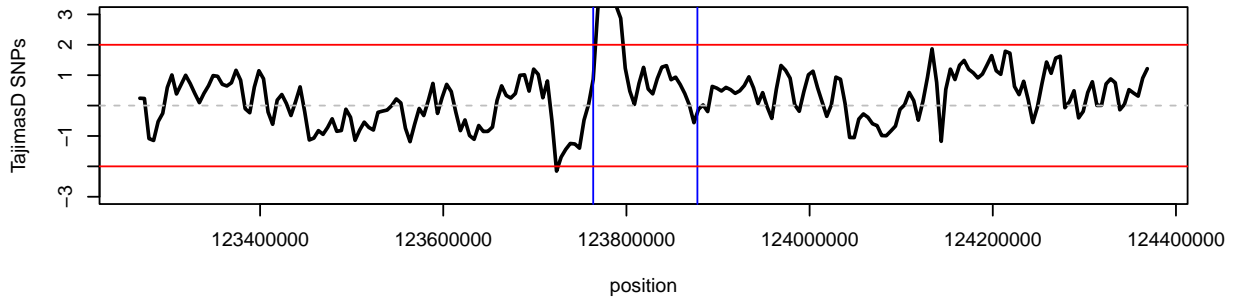

**7 CHB CSH**

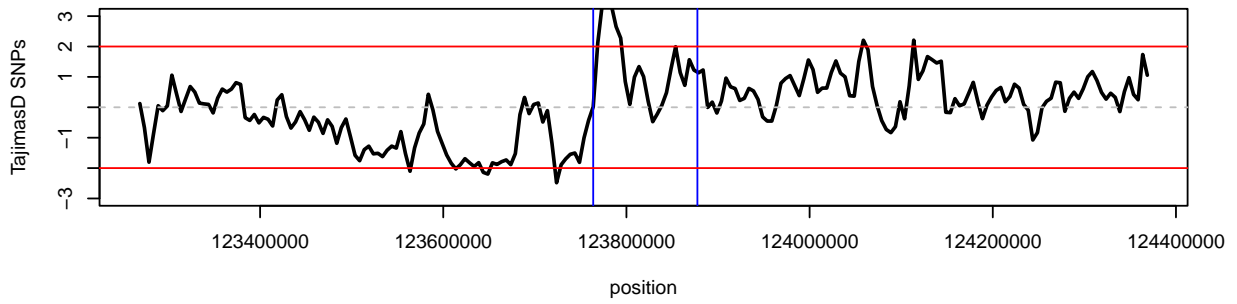

**7 YRI CSH**

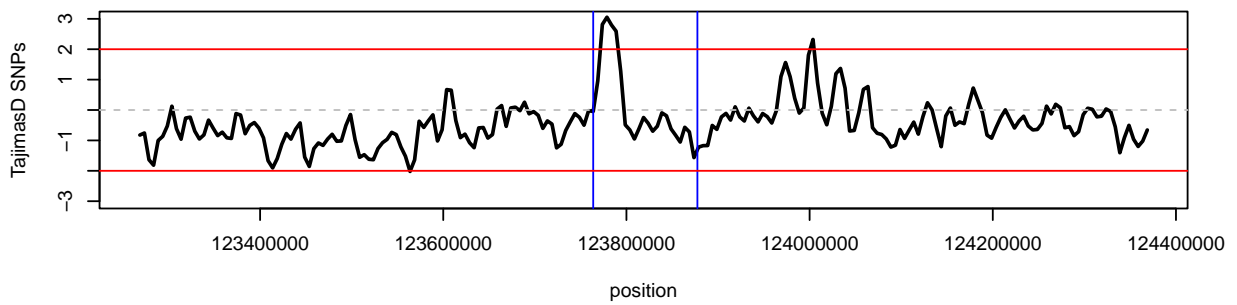

**8 CEU CSH**

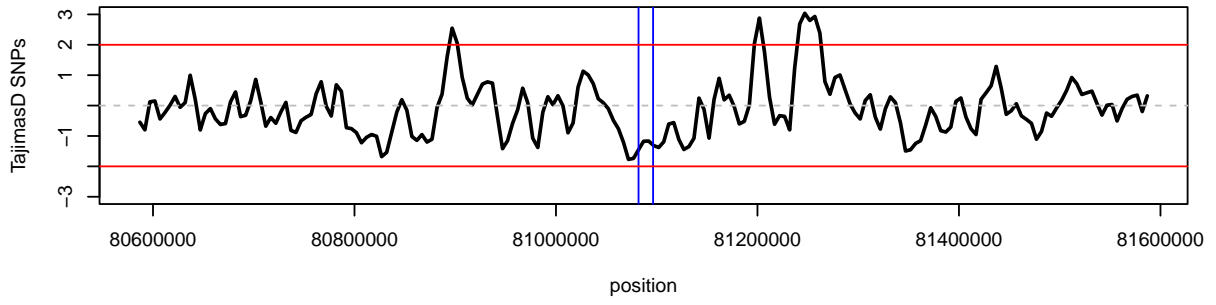

**8 CHB CSH**

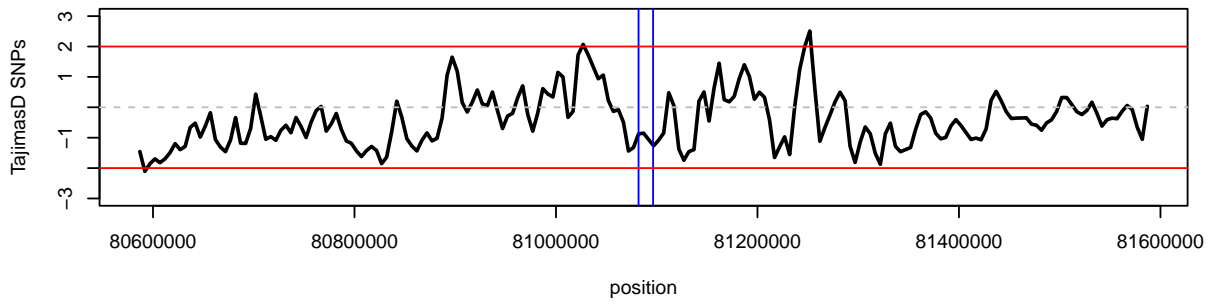

**8 YRI CSH**

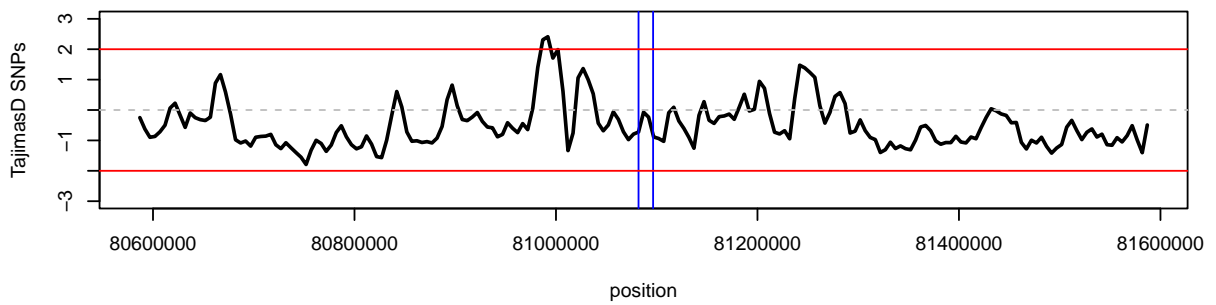

**9 CEU CSH**

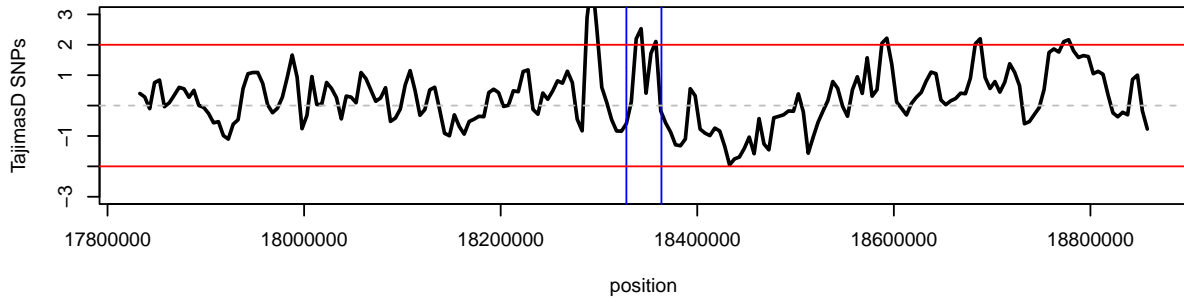

**9 CHB CSH**

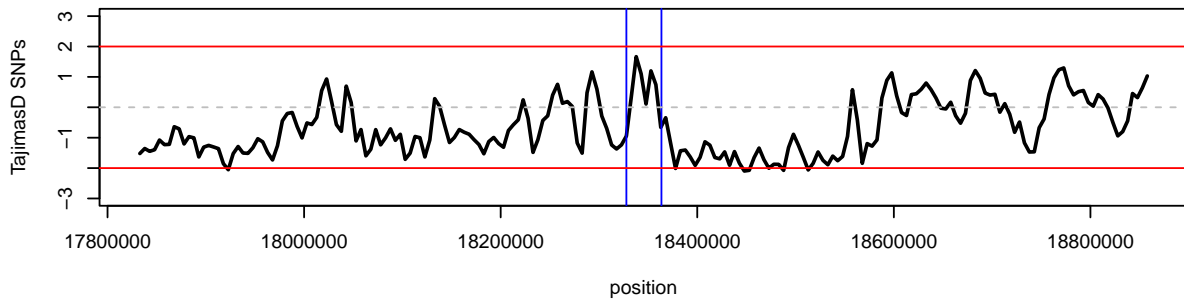

**9 YRI CSH**

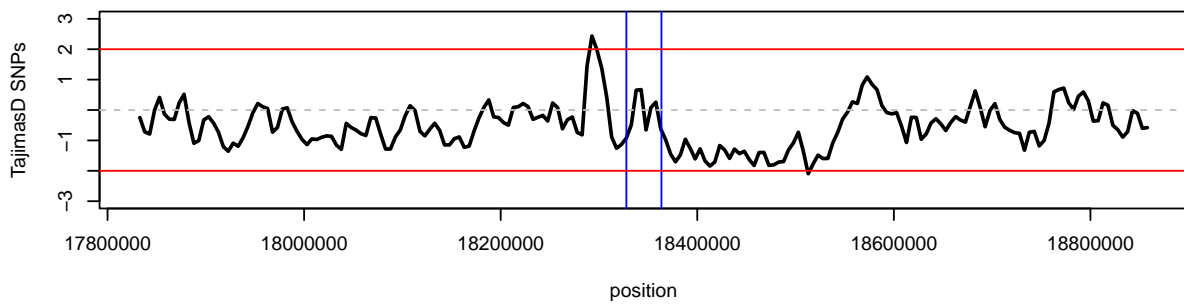

**10 CEU CSH**

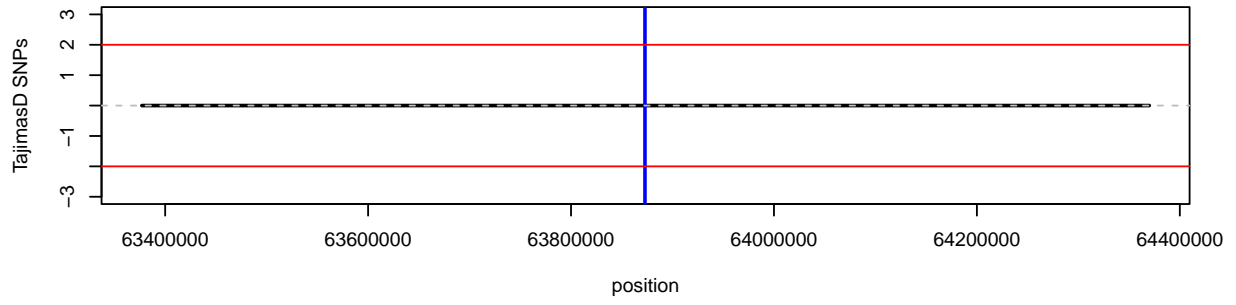

**10 CHB CSH**

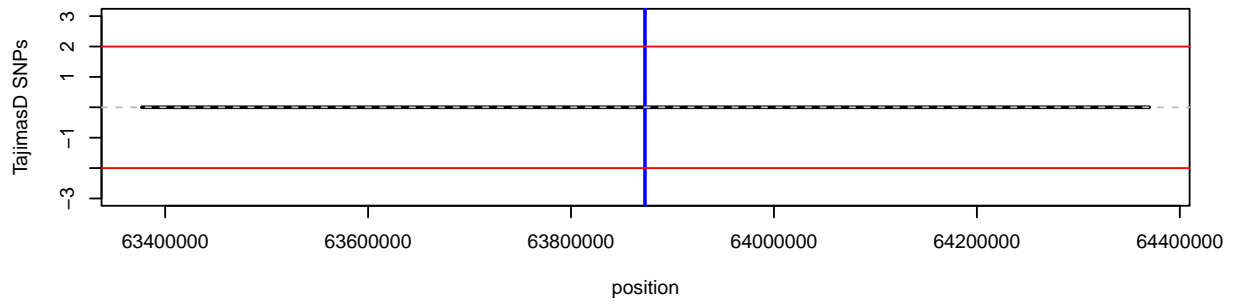

**10 YRI CSH**

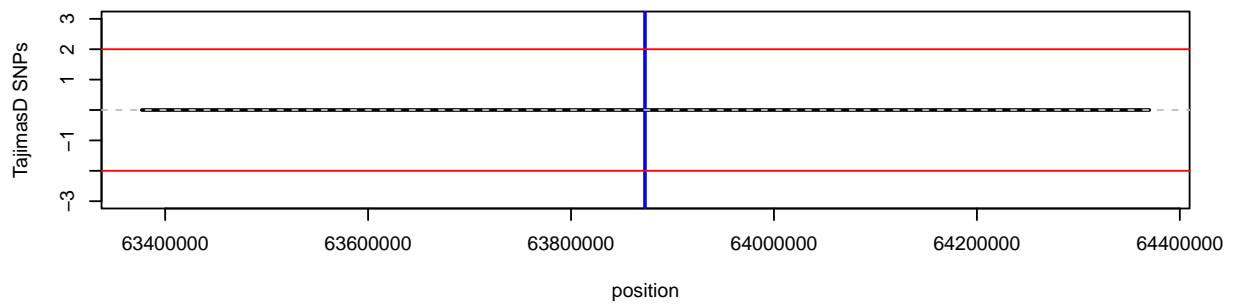

### 11 CEU CSH

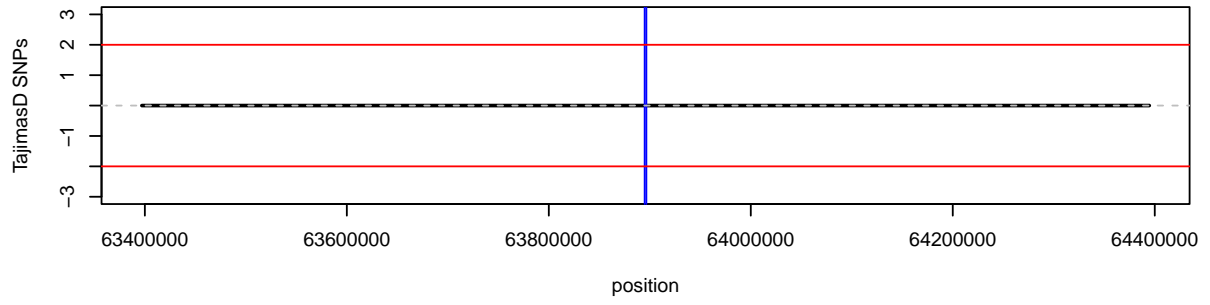

### 11 CHB CSH

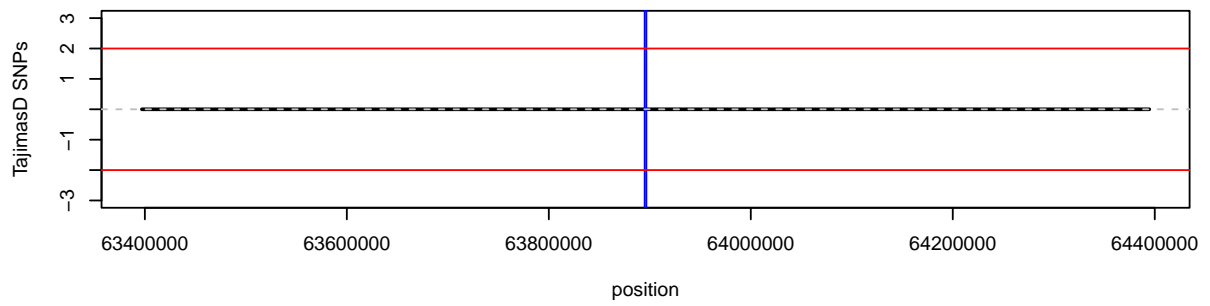

### 11 YRI CSH

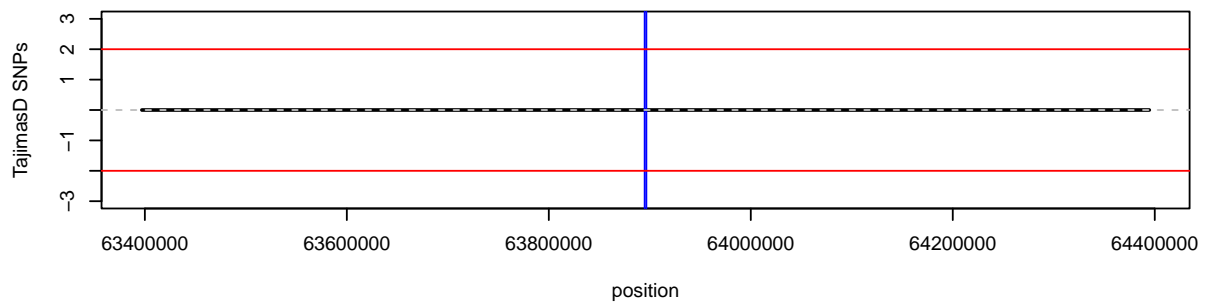



**12 CEU CSH**

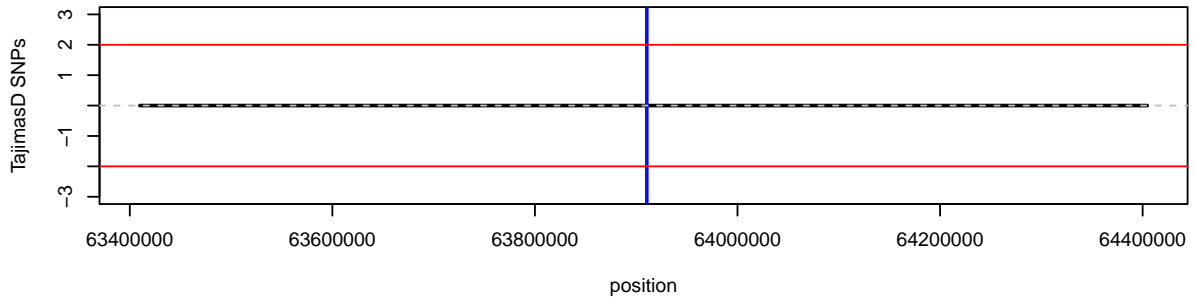

**12 CHB CSH**

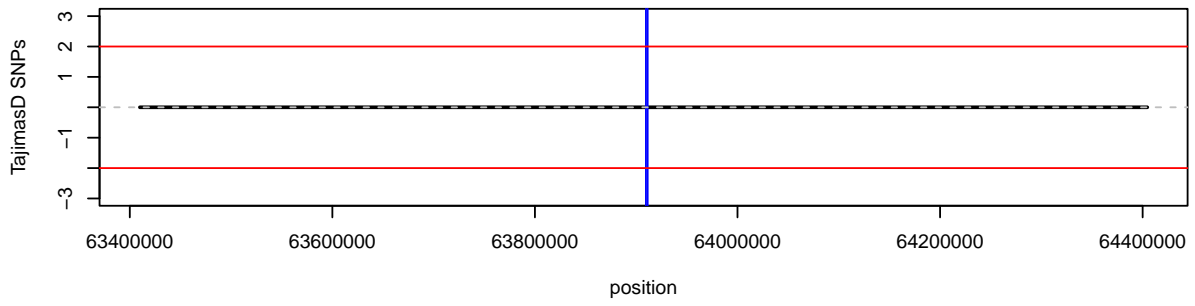

**12 YRI CSH**

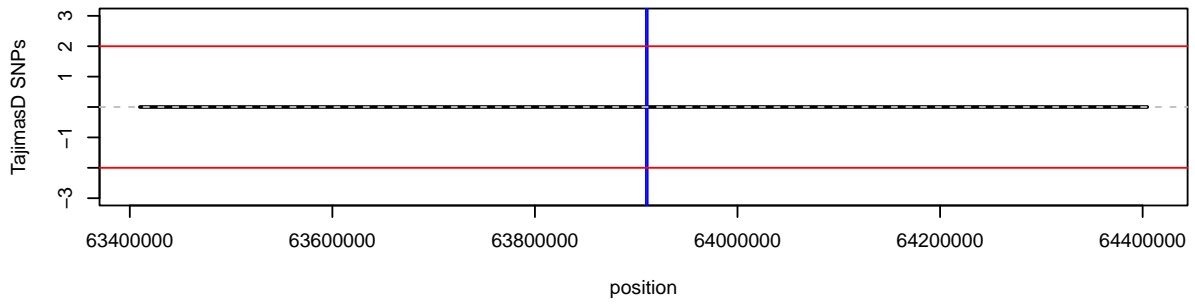

**13 CEU CSH**

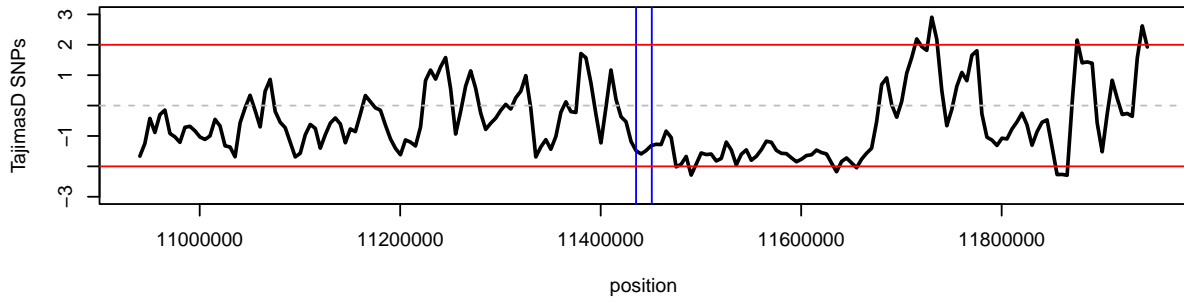

**13 CHB CSH**

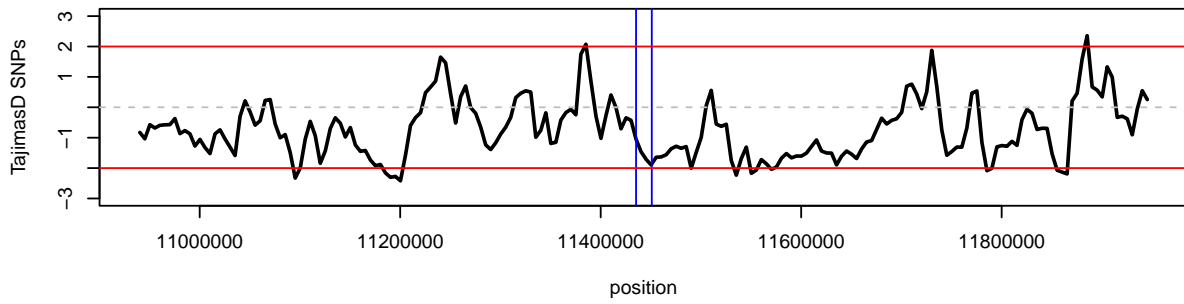

**13 YRI CSH**

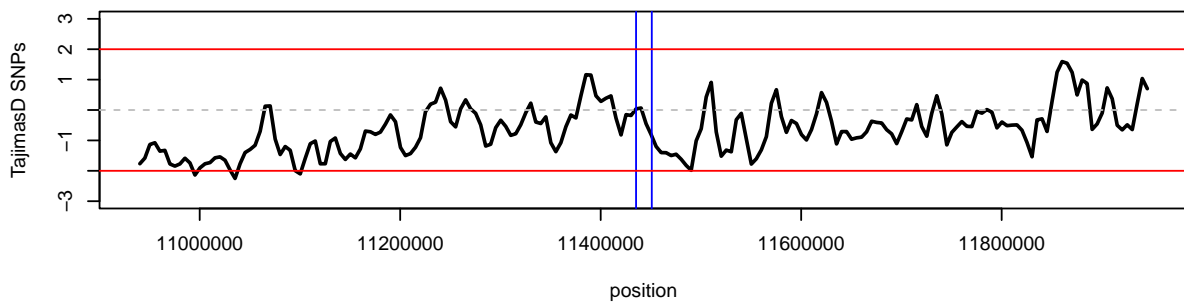

### 14 CEU CSH

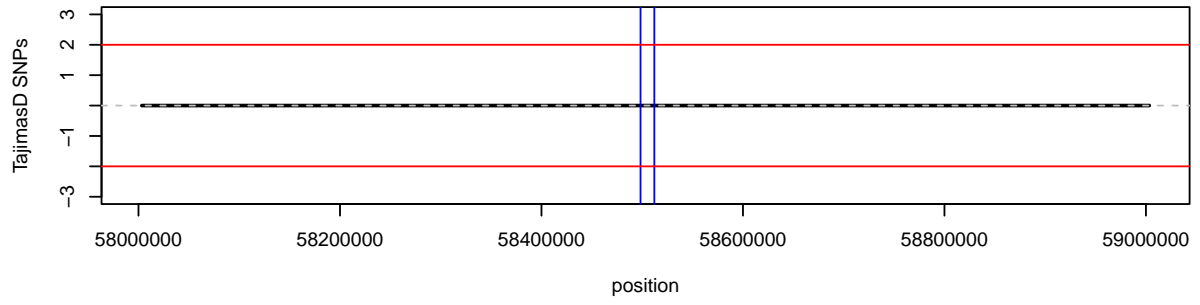

### 14 CHB CSH

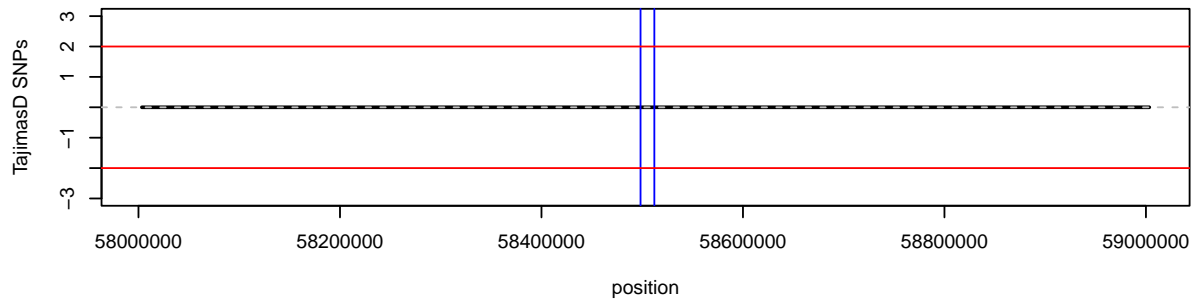

### 14 YRI CSH

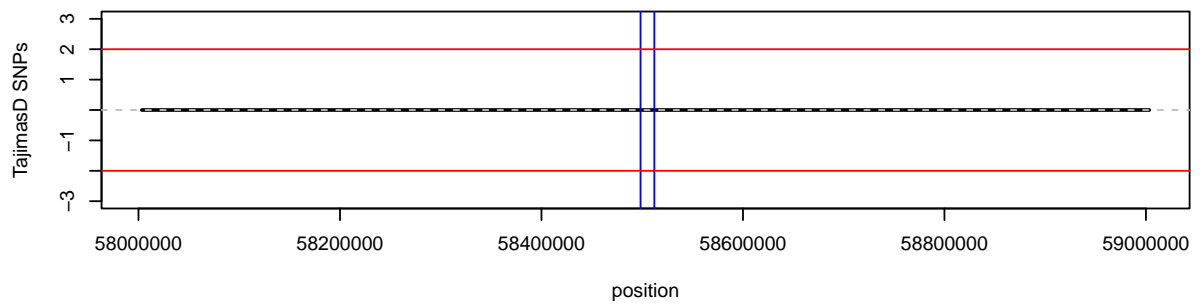

15 CEU DEFA1

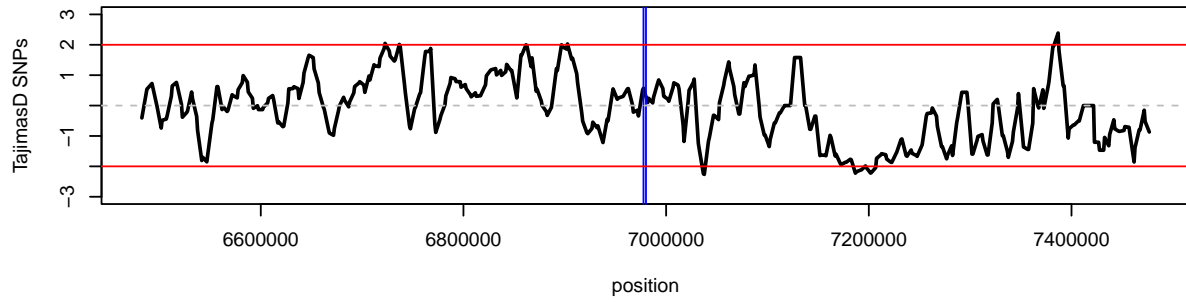

15 CHB DEFA1

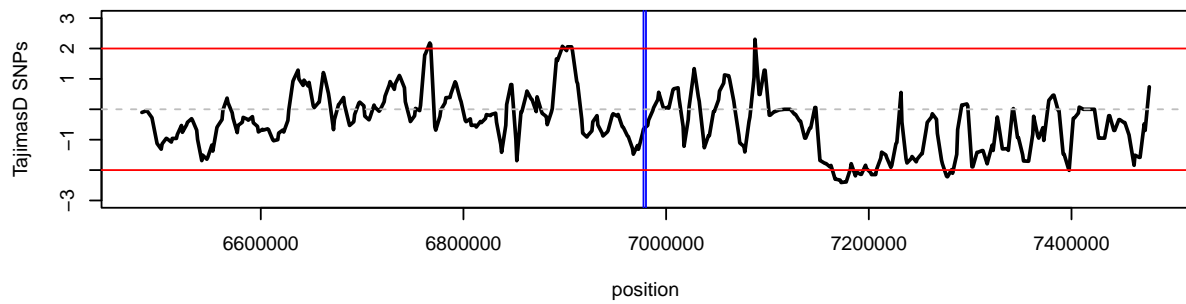

15 YRI DEFA1

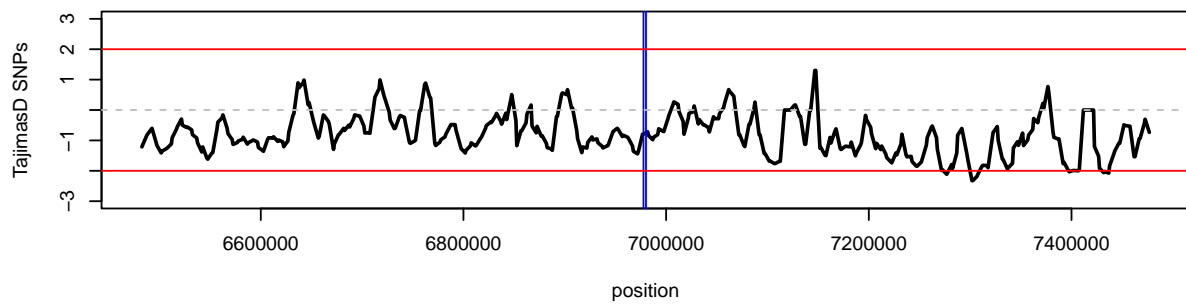

16 CEU DEFA1

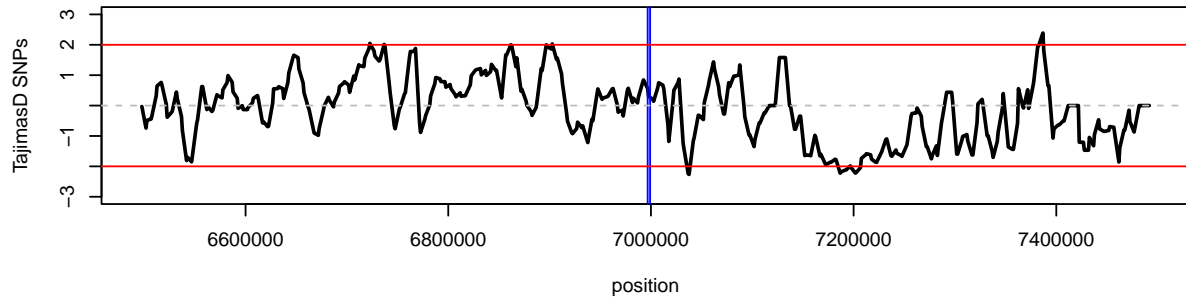

16 CHB DEFA1

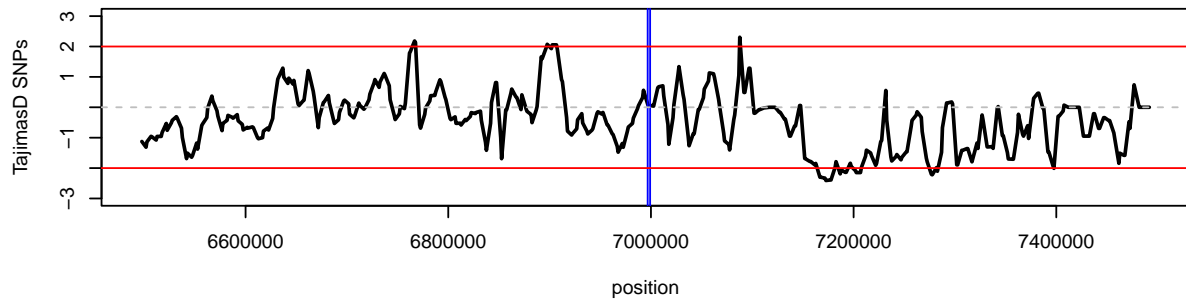

16 YRI DEFA1

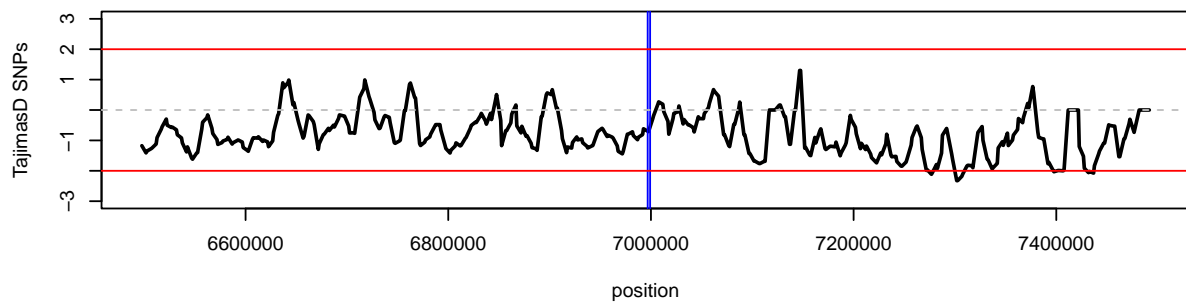

17 CEU DEFB130

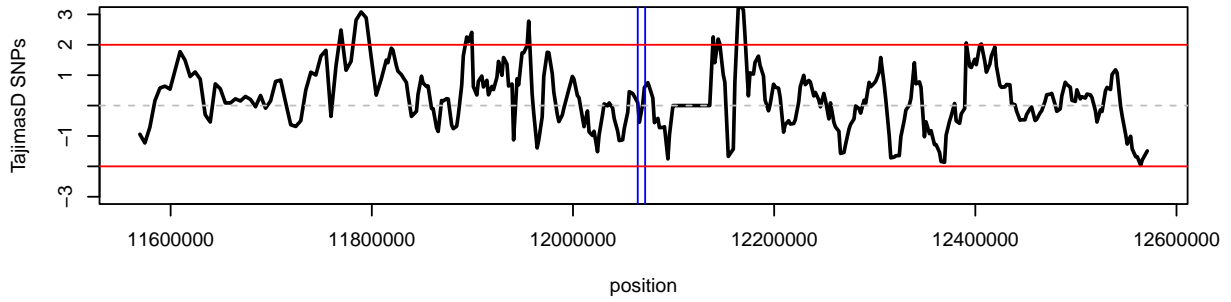

17 CHB DEFB130

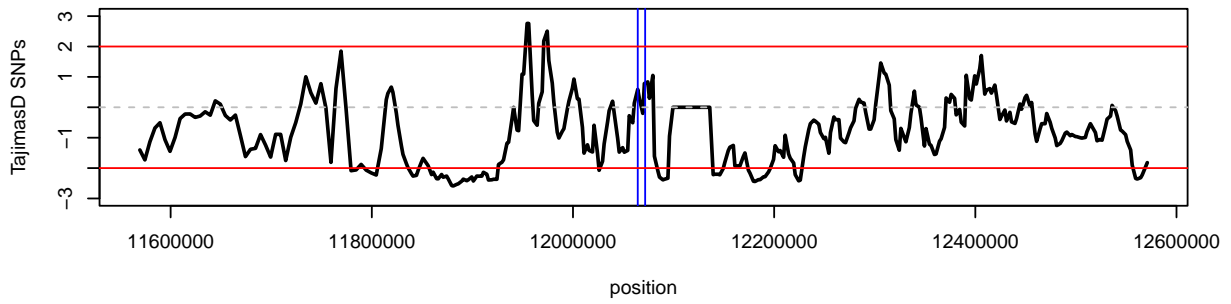

17 YRI DEFB130

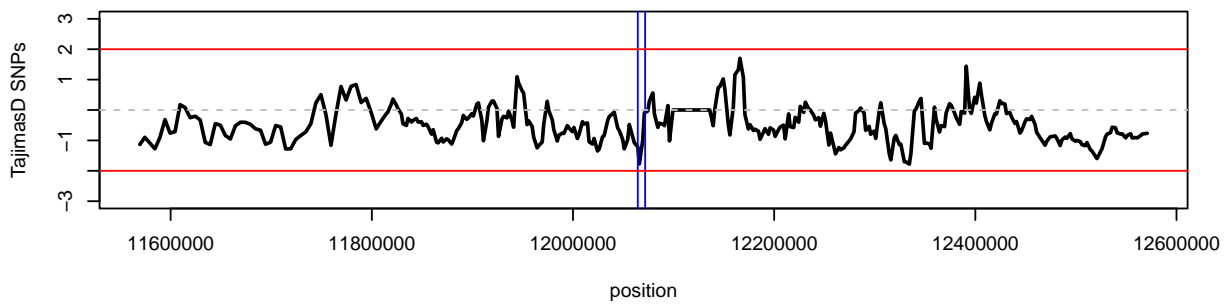

18 CEU DEFB130

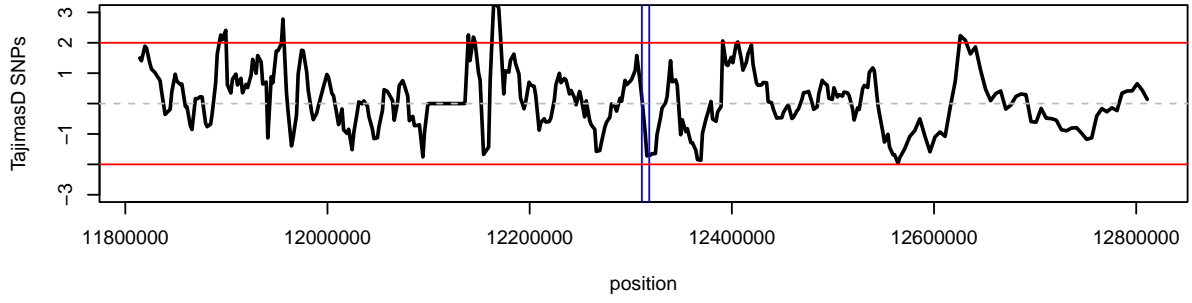

18 CHB DEFB130

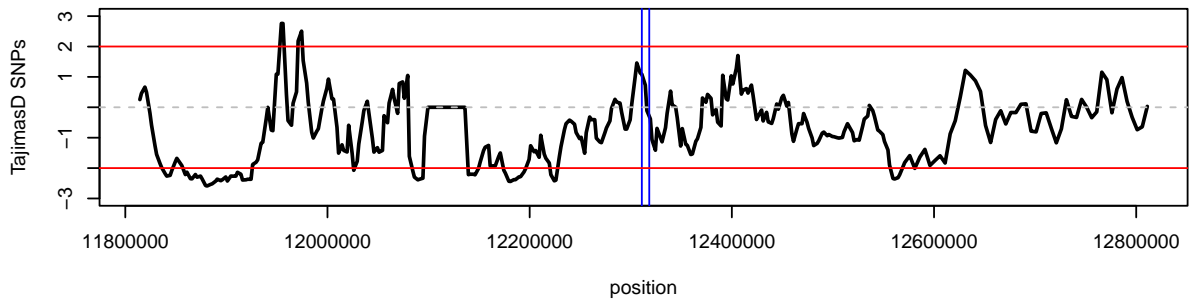

18 YRI DEFB130

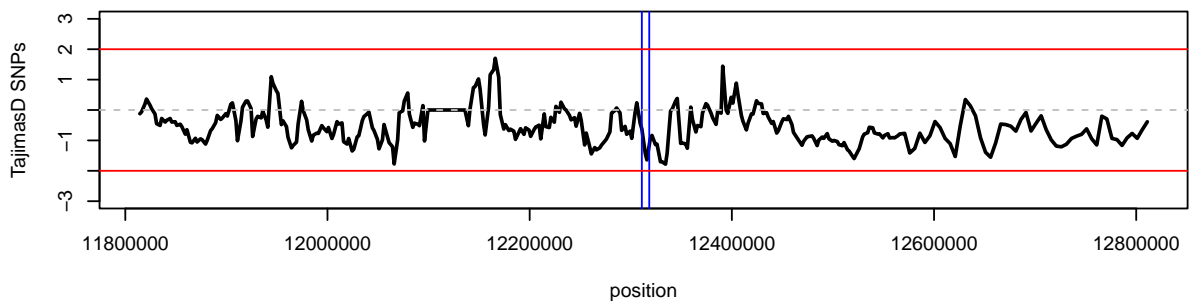

**19 CEU FAM72A**

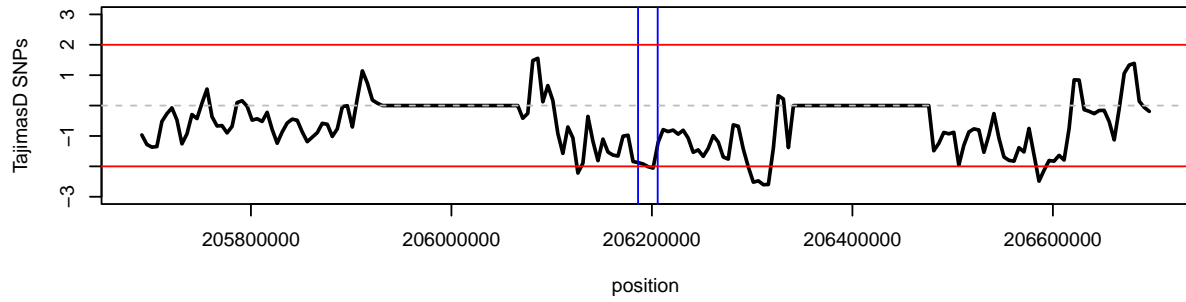

**19 CHB FAM72A**

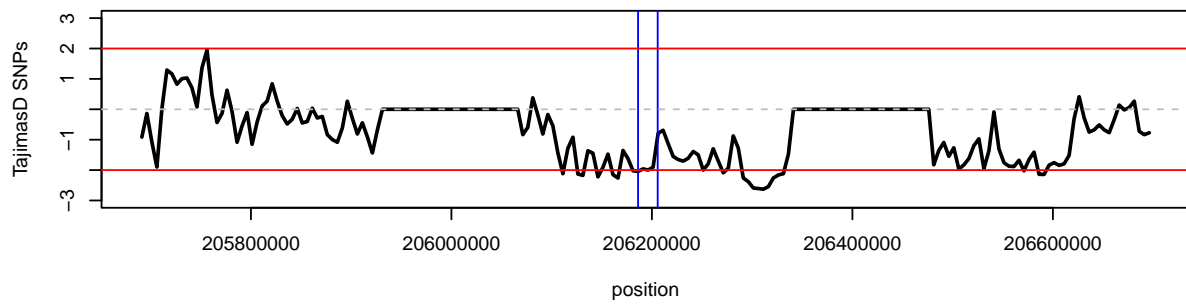

**19 YRI FAM72A**

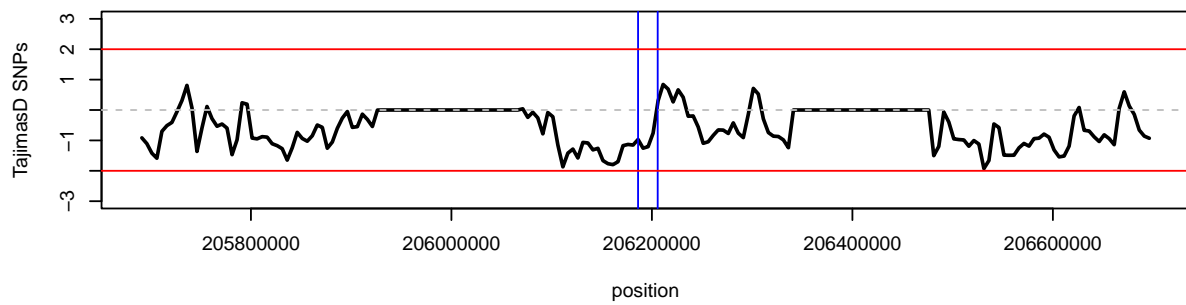



**20 CEU FAM75A1**

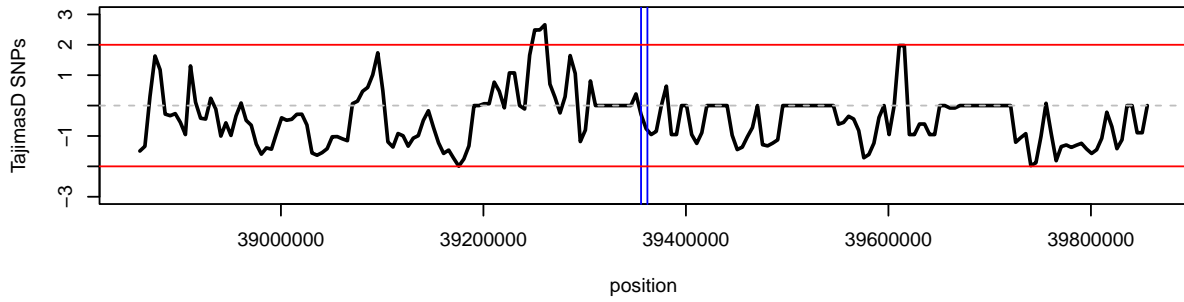

**20 CHB FAM75A1**

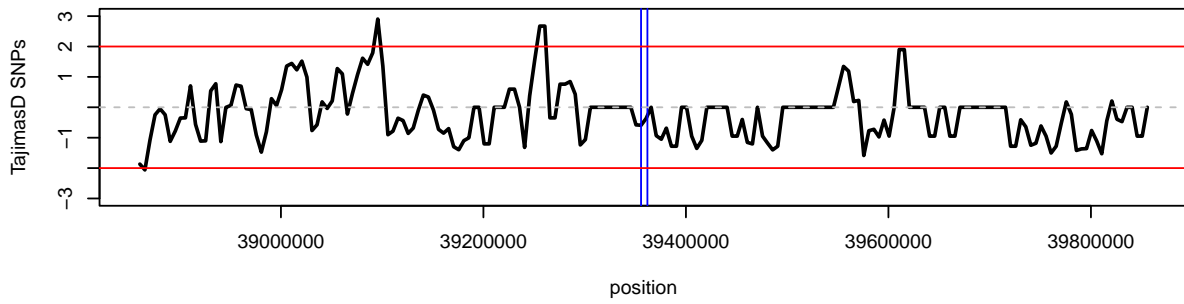

**20 YRI FAM75A1**

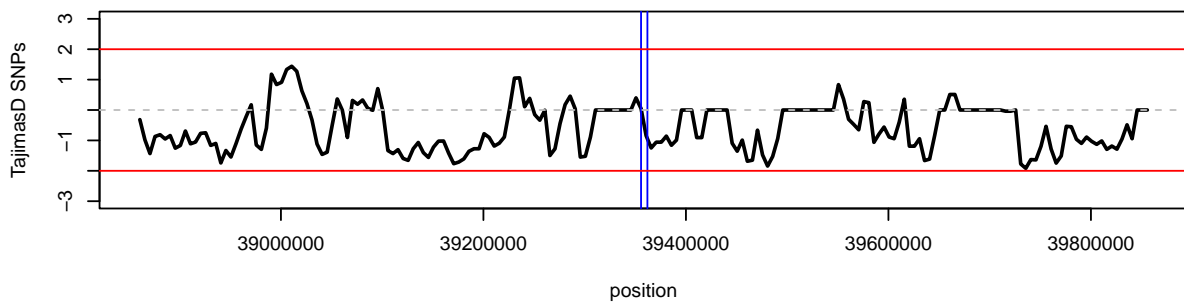

**21 CEU FAM75A5**

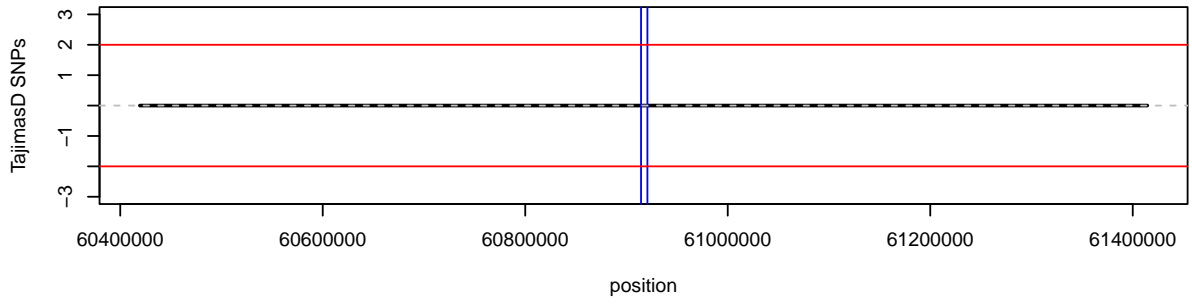

**21 CHB FAM75A5**

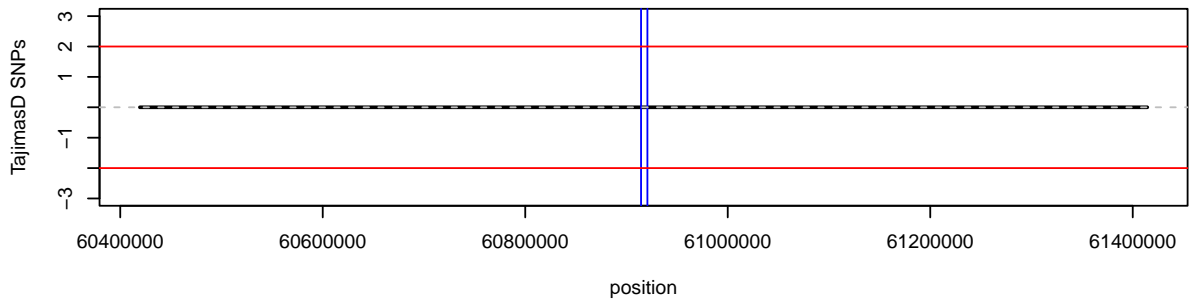

**21 YRI FAM75A5**

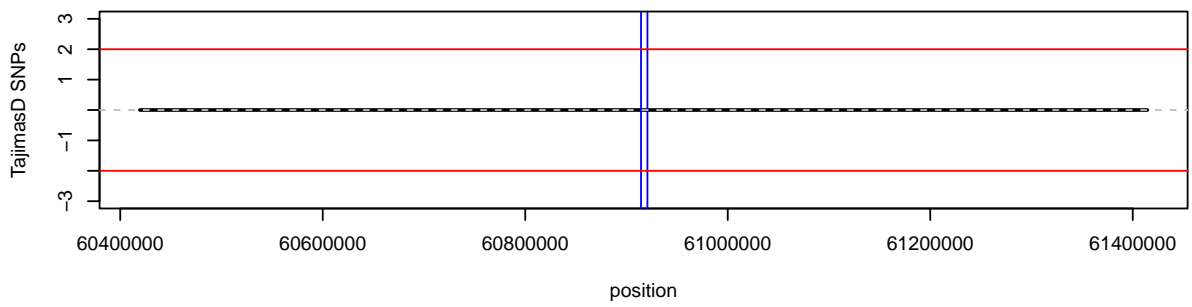

22 CEU FOXD4L2

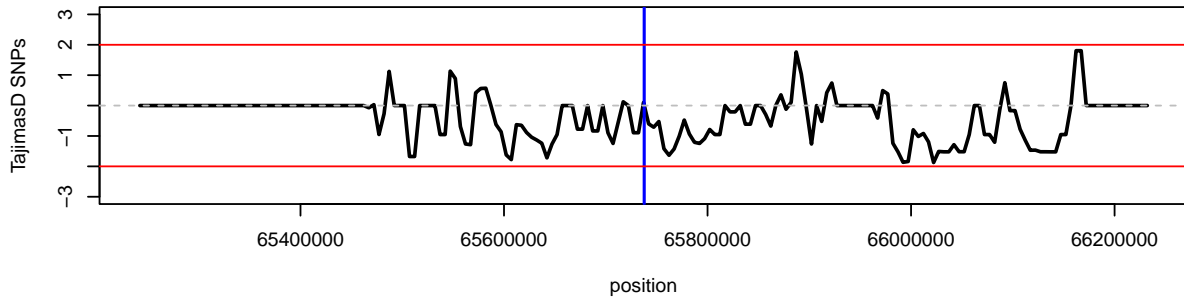

22 CHB FOXD4L2

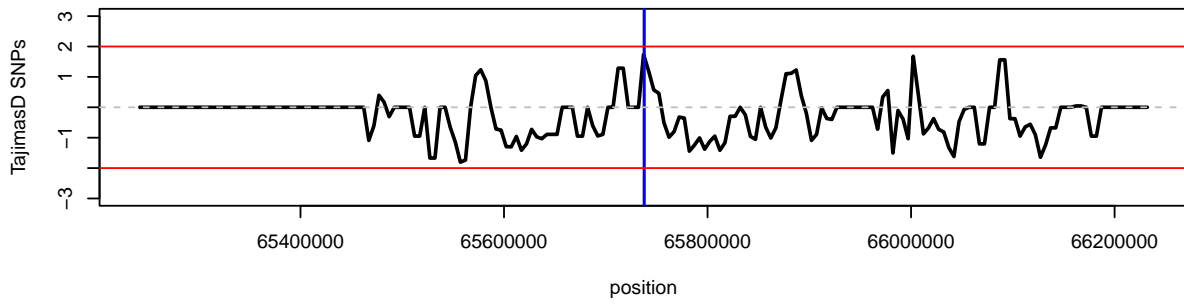

22 YRI FOXD4L2

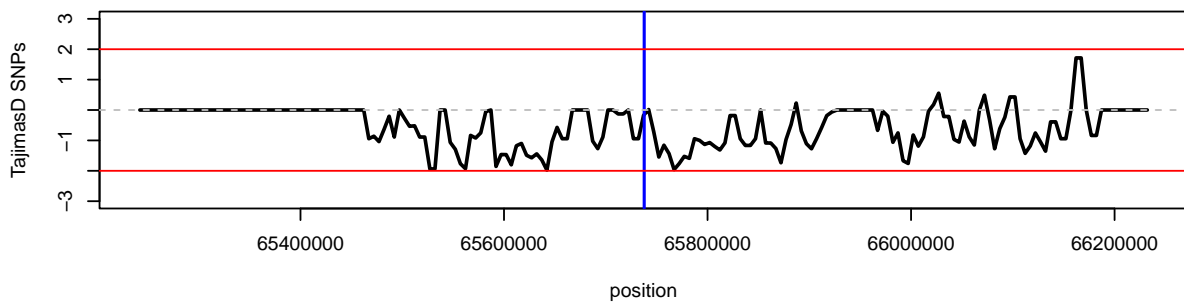

23 CEU FOXD4L2

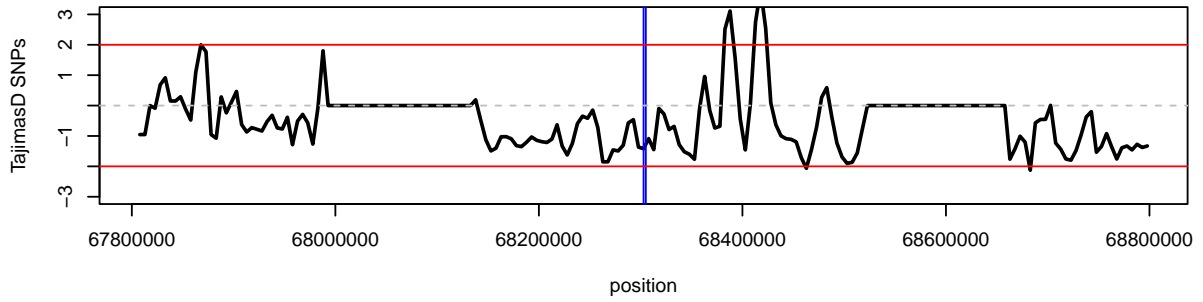

23 CHB FOXD4L2

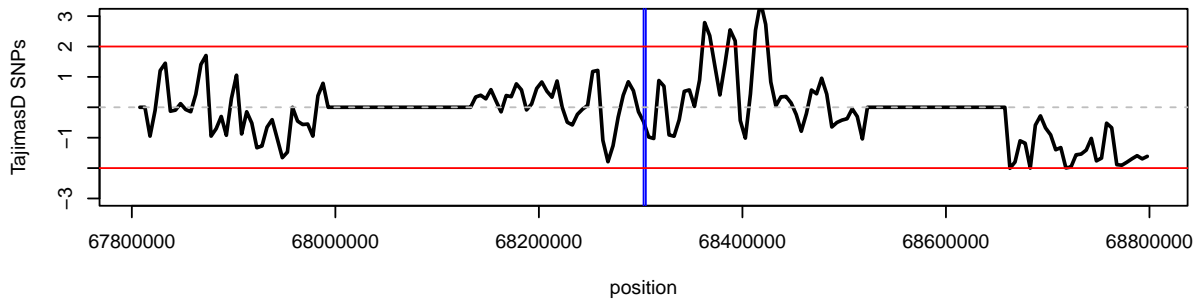

23 YRI FOXD4L2

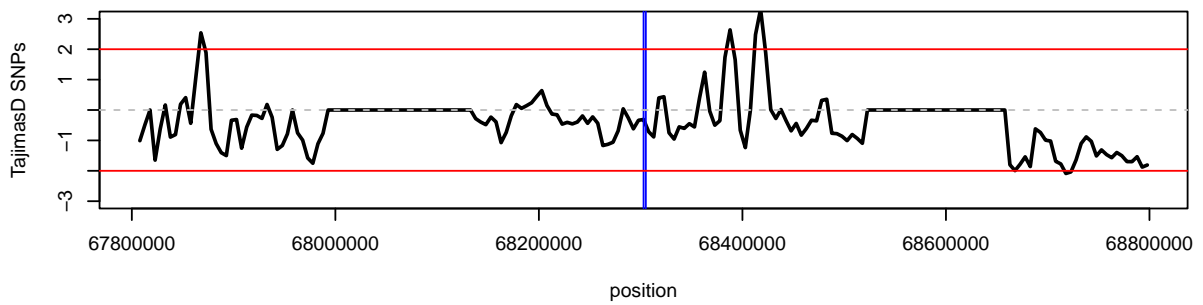

**24 CEU GOLGA6L9**

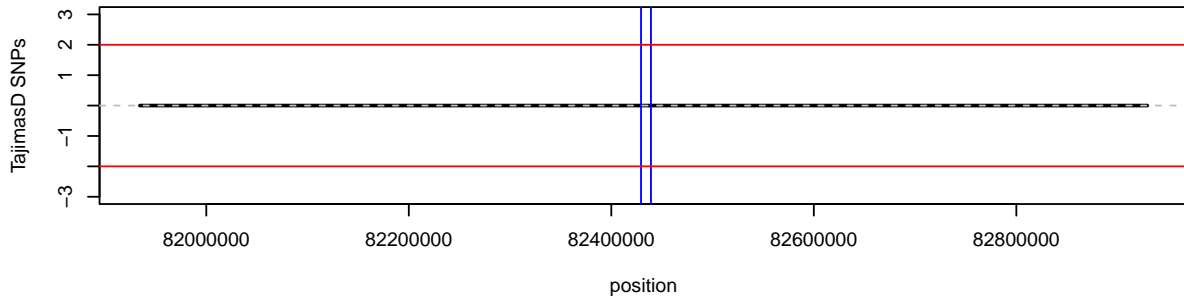

**24 CHB GOLGA6L9**

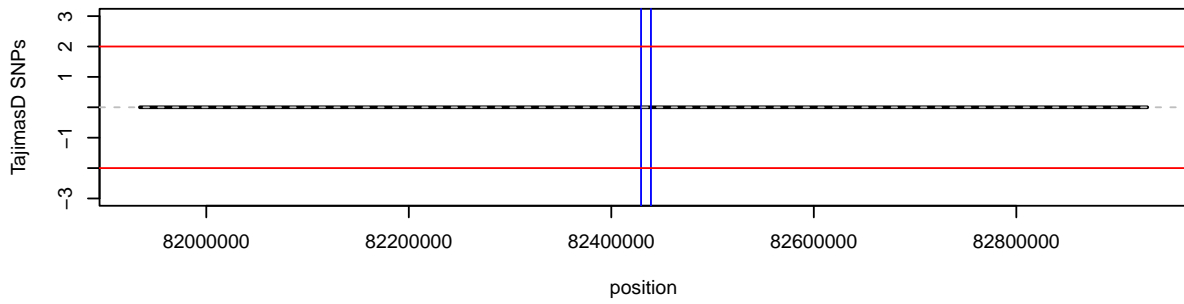

**24 YRI GOLGA6L9**

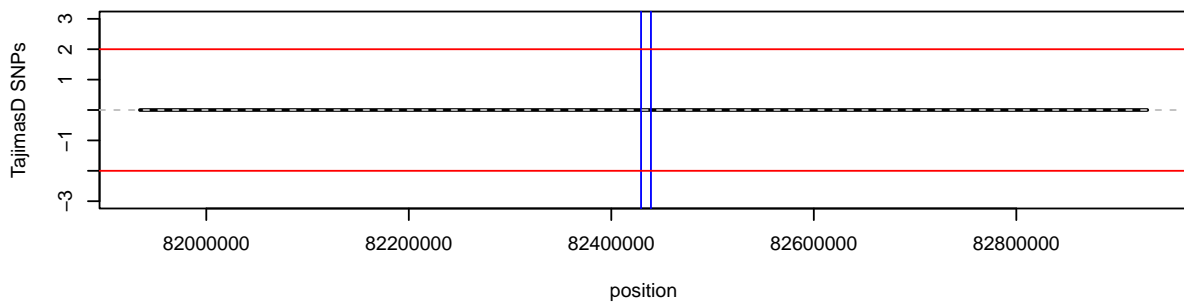

**25 CEU GOLGA8G**

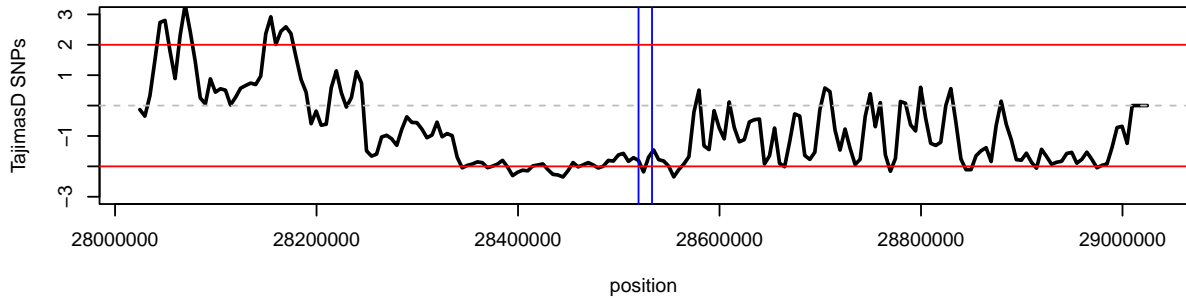

**25 CHB GOLGA8G**

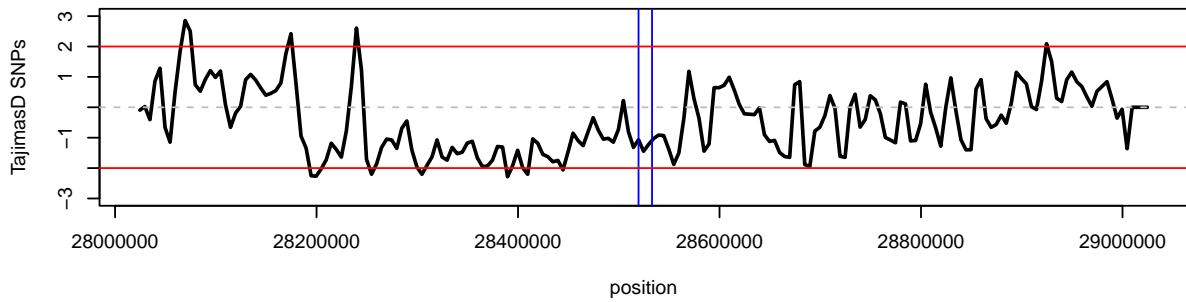

**25 YRI GOLGA8G**

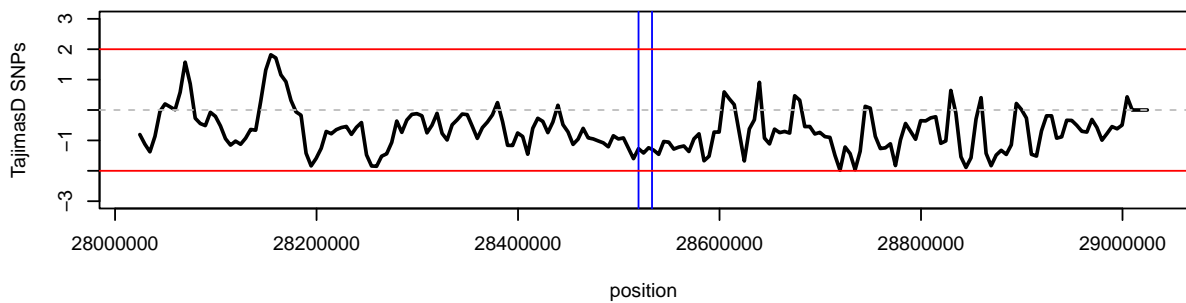

**26 CEU HIST2**

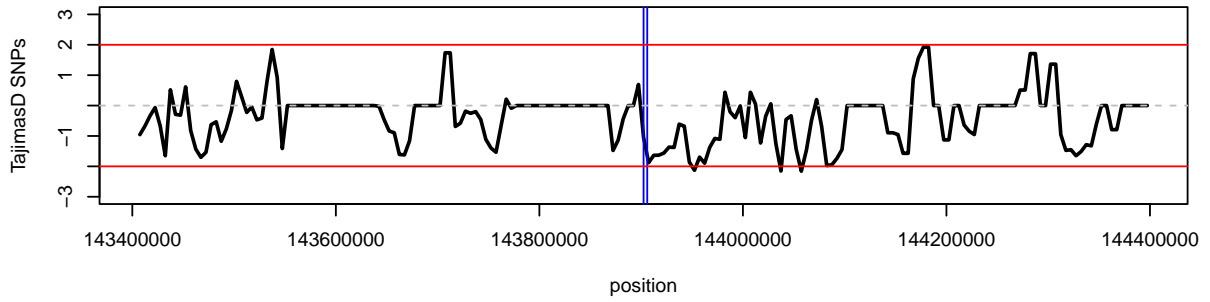

**26 CHB HIST2**

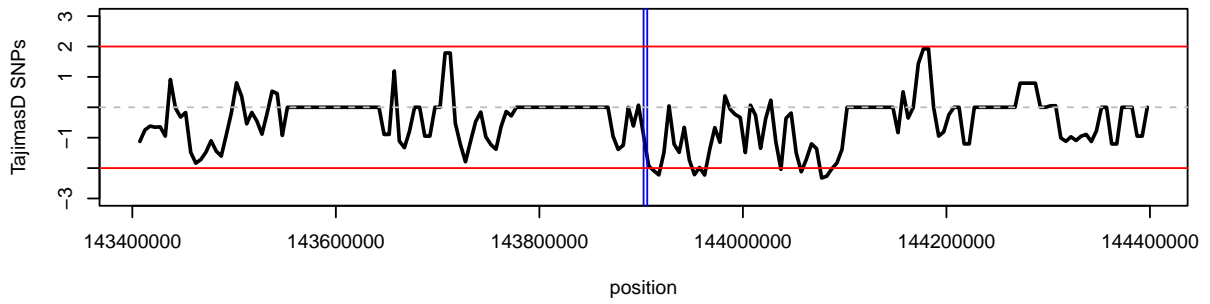

**26 YRI HIST2**

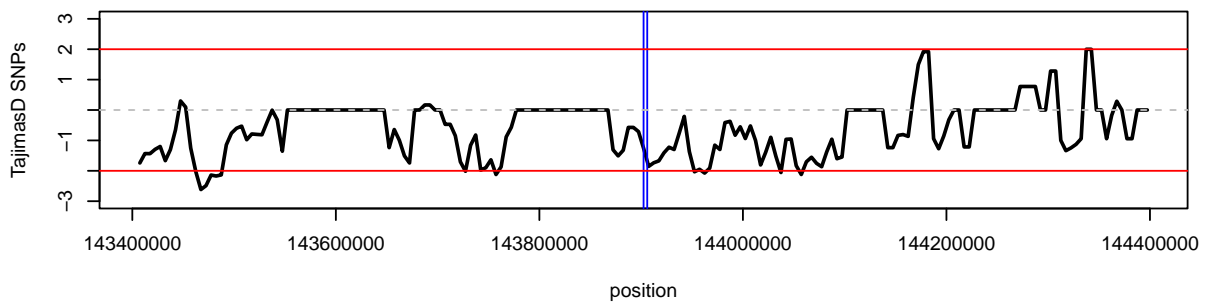

27 CEU HIST2

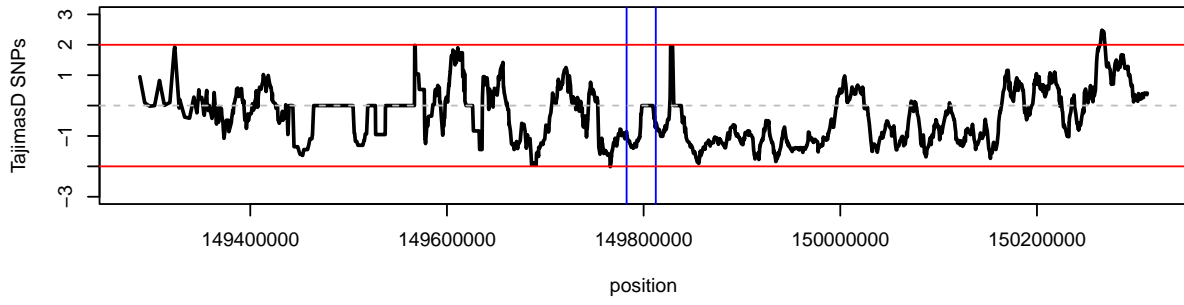

27 CHB HIST2

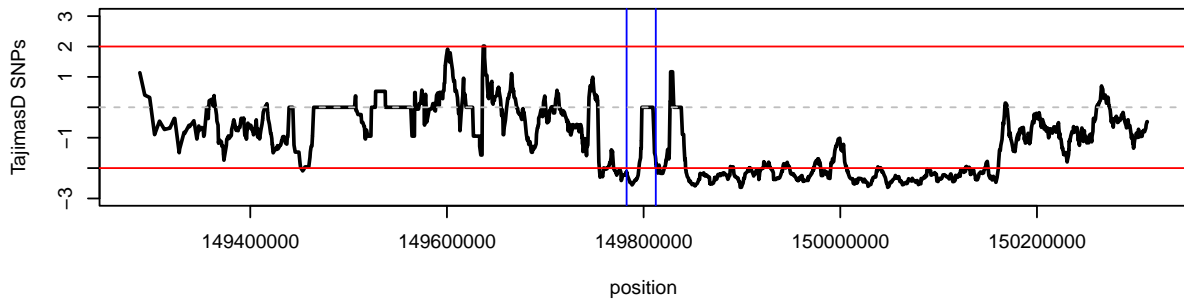

27 YRI HIST2

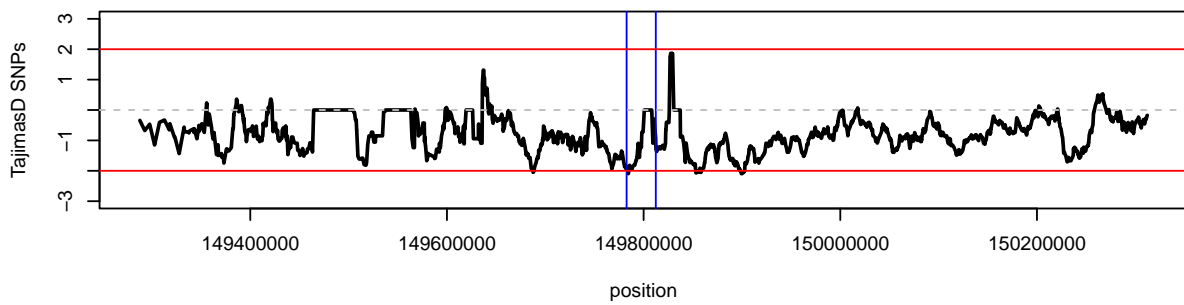



**28 CEU HIST2**

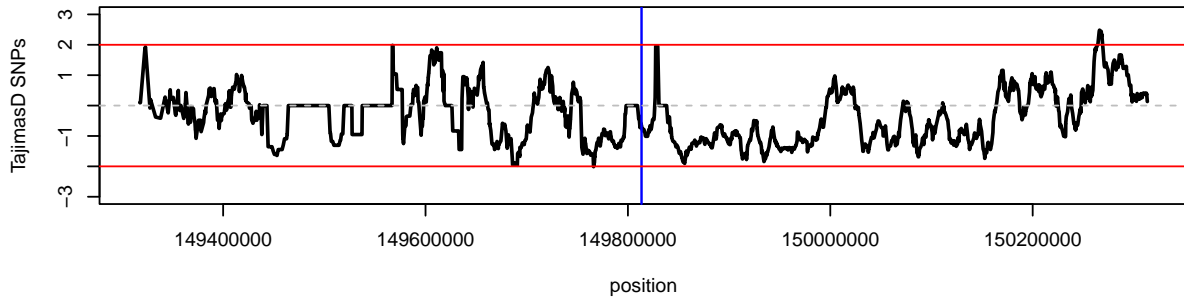

**28 CHB HIST2**

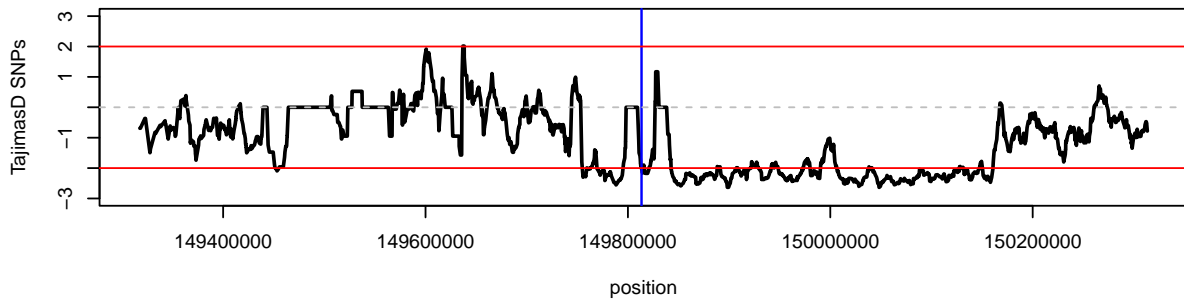

**28 YRI HIST2**

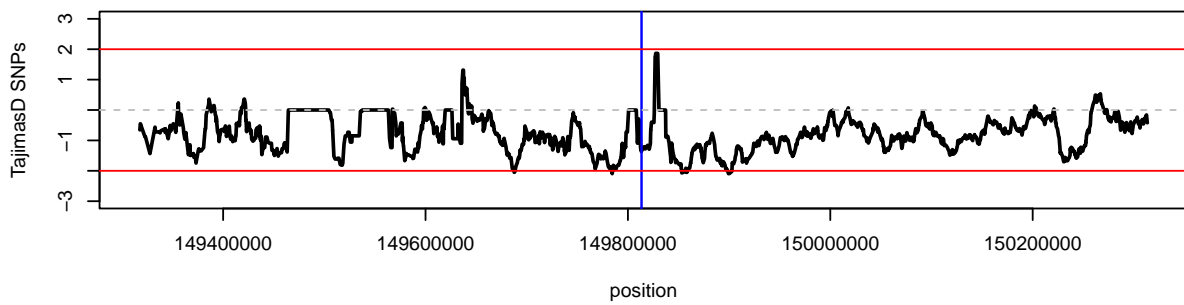

29 CEU HIST2

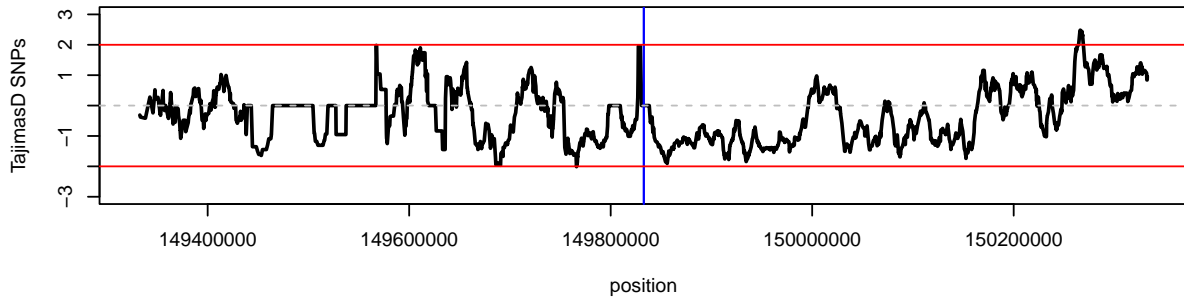

29 CHB HIST2

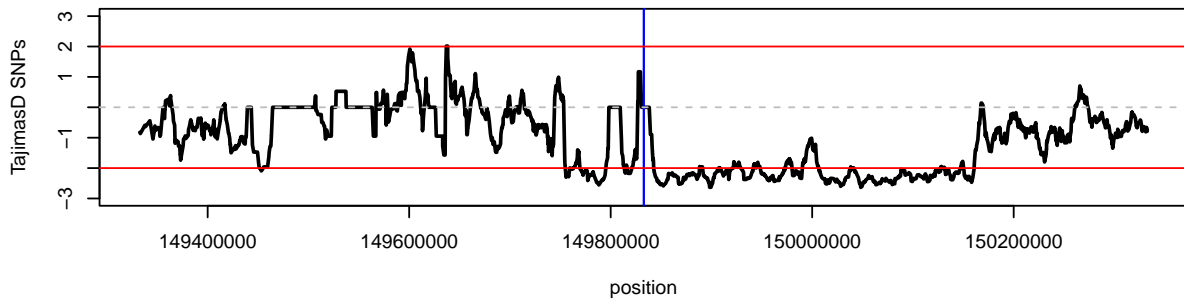

29 YRI HIST2

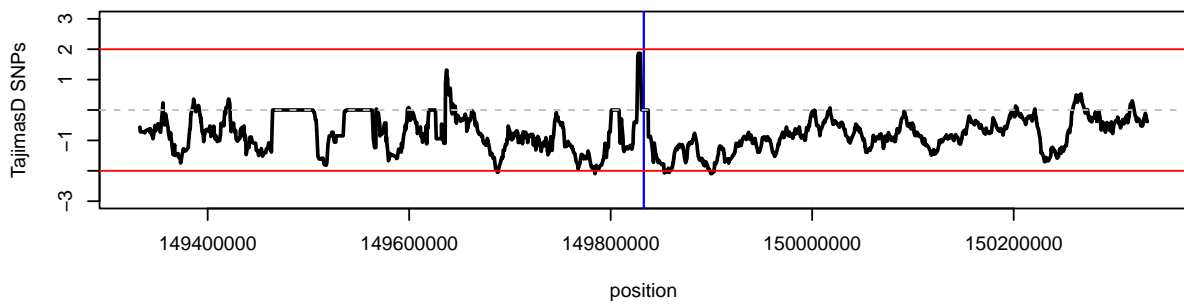

30 CEU HIST2

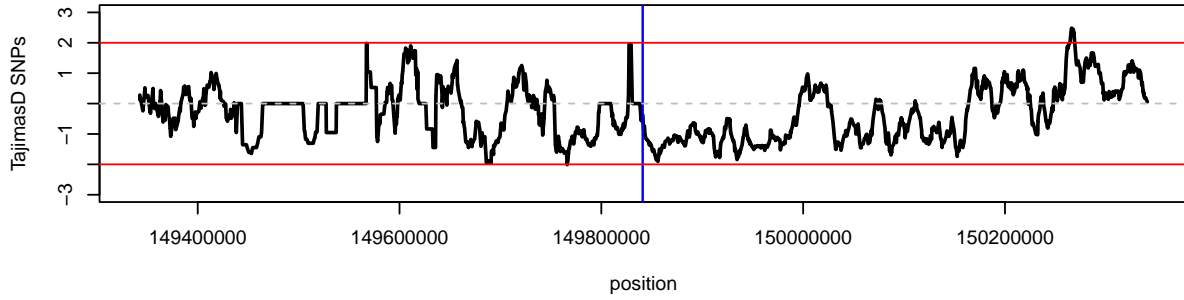

30 CHB HIST2

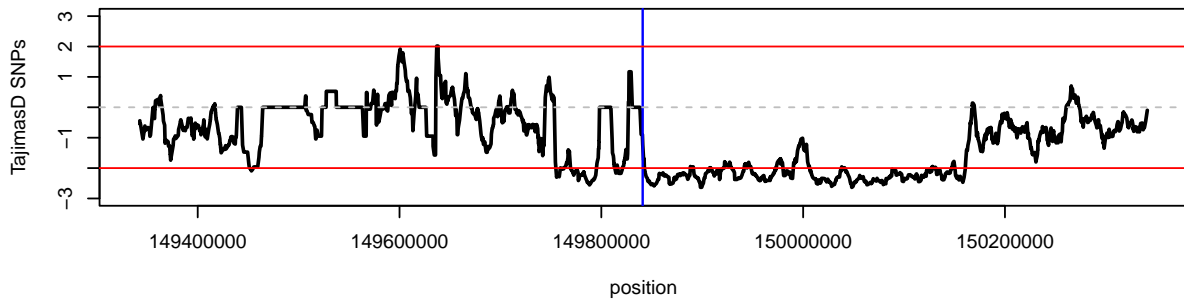

30 YRI HIST2

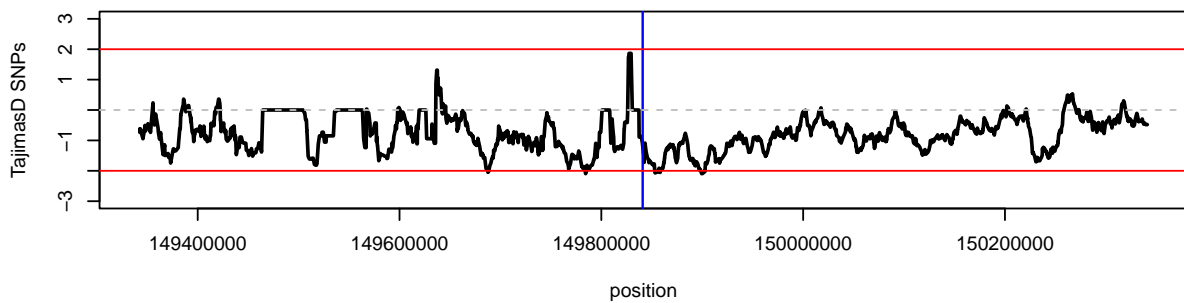

31 CEU HIST2

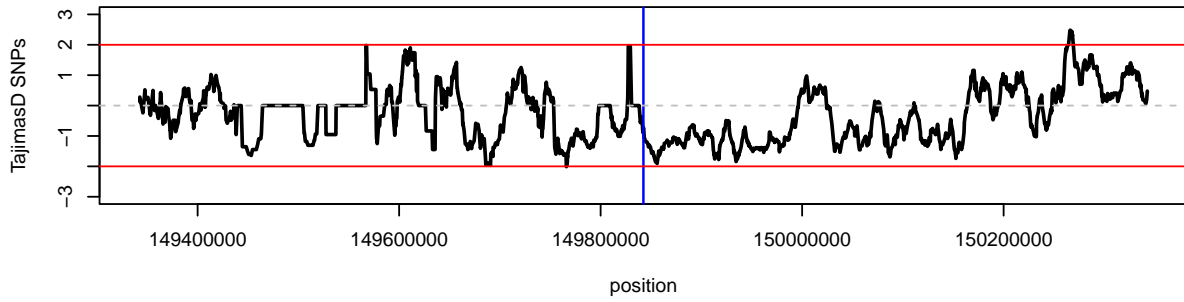

31 CHB HIST2

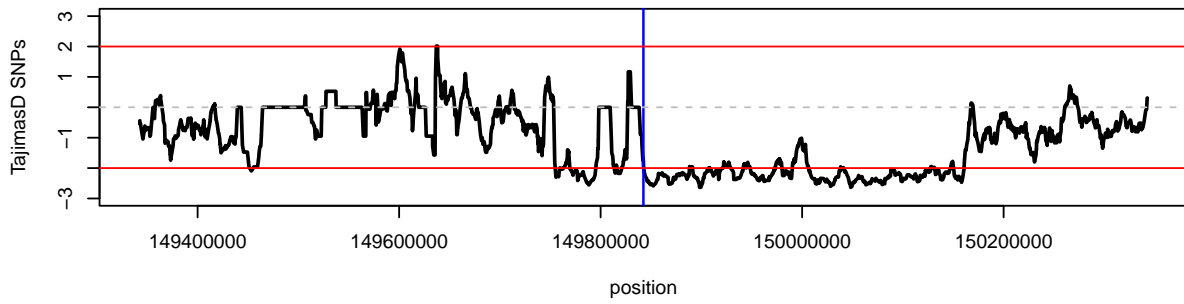

31 YRI HIST2

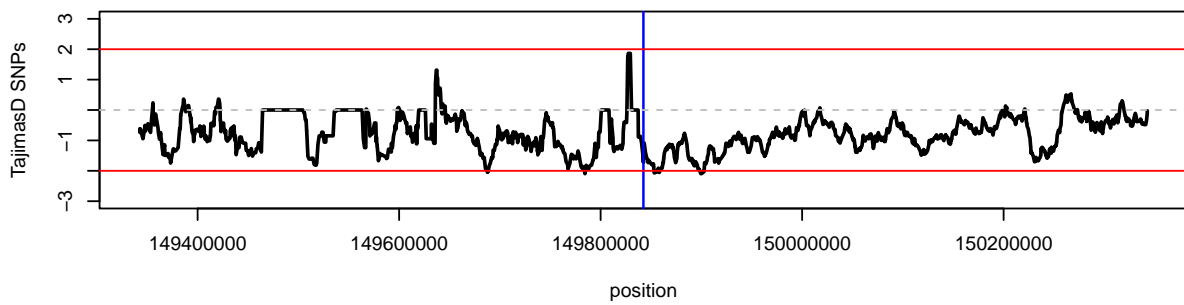

32 CEU HIST2

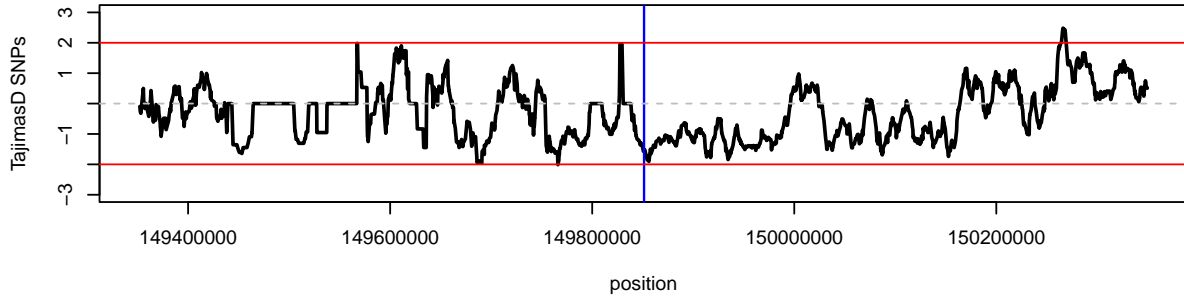

32 CHB HIST2

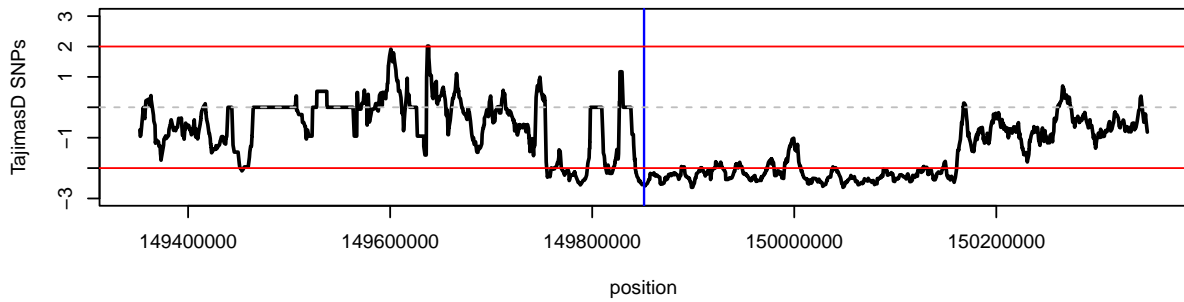

32 YRI HIST2

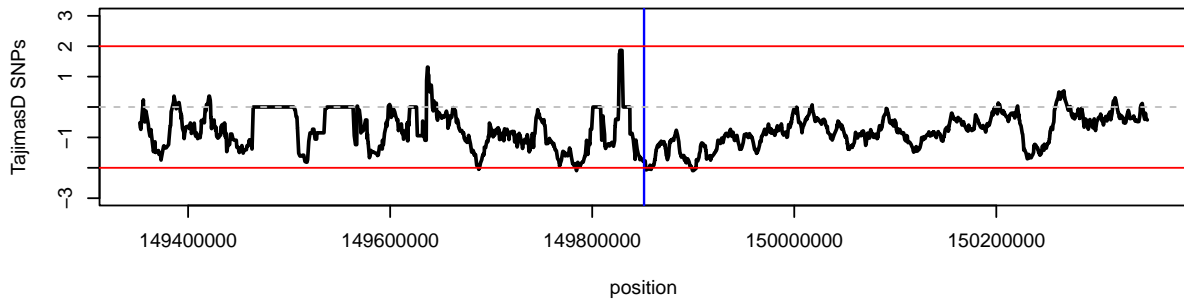

**33 CEU HIST2**

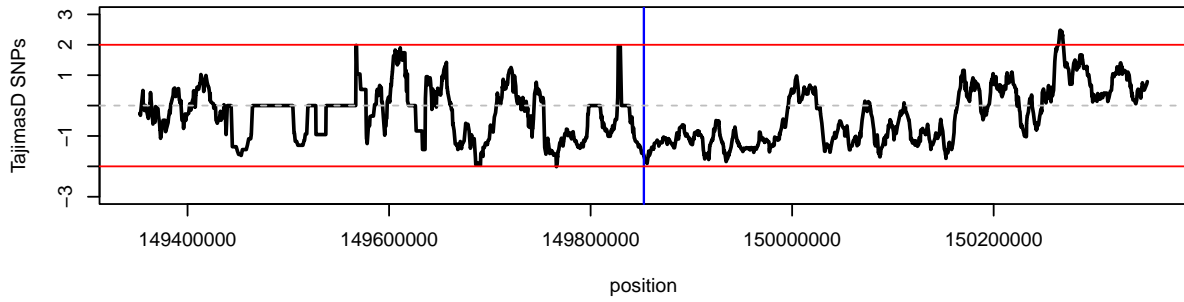

**33 CHB HIST2**

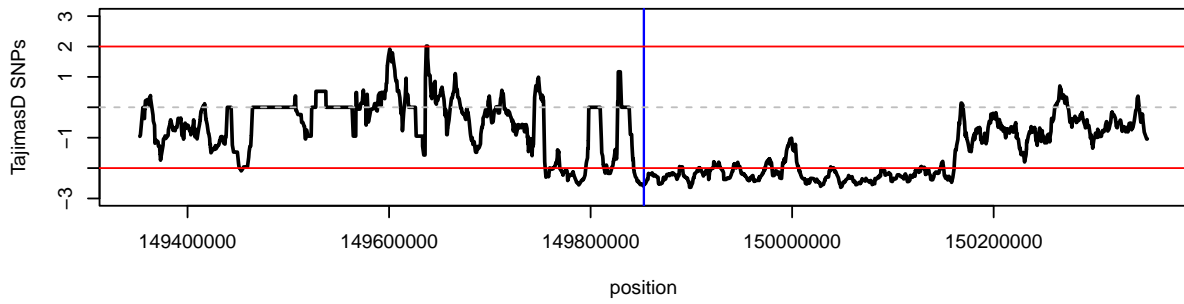

**33 YRI HIST2**

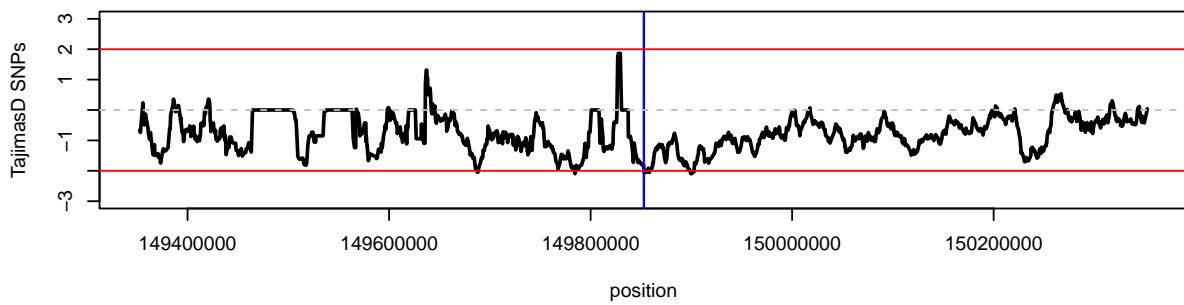

34 CEU HIST2

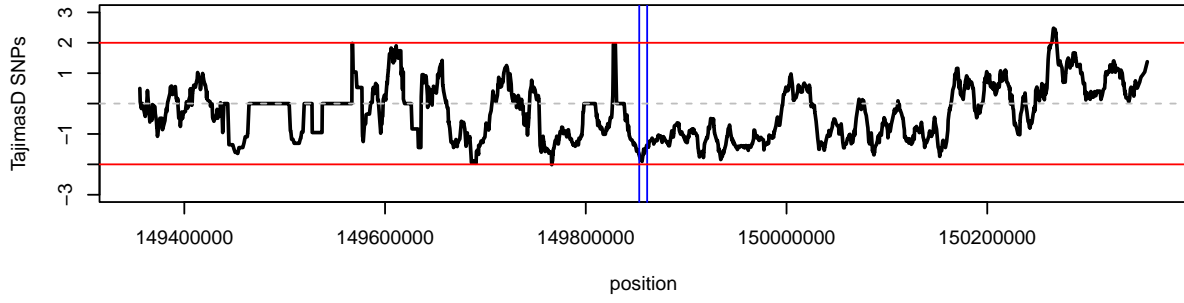

34 CHB HIST2

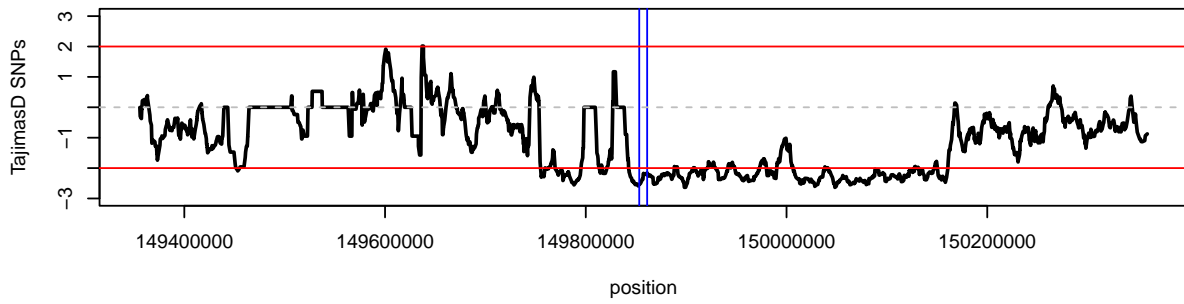

34 YRI HIST2

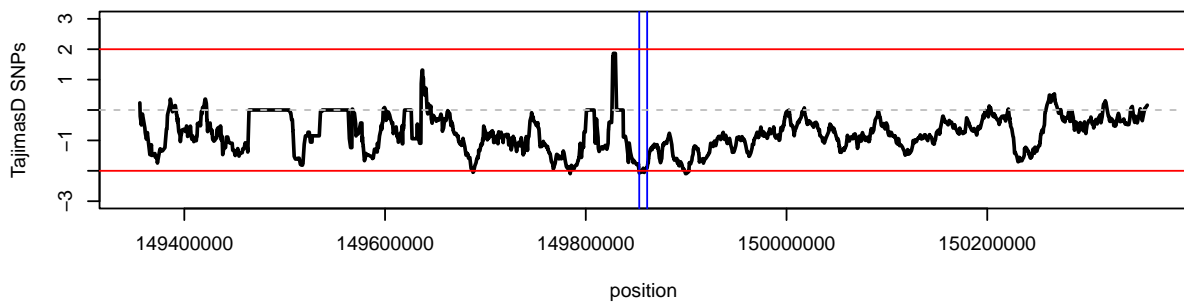

35 CEU HIST2

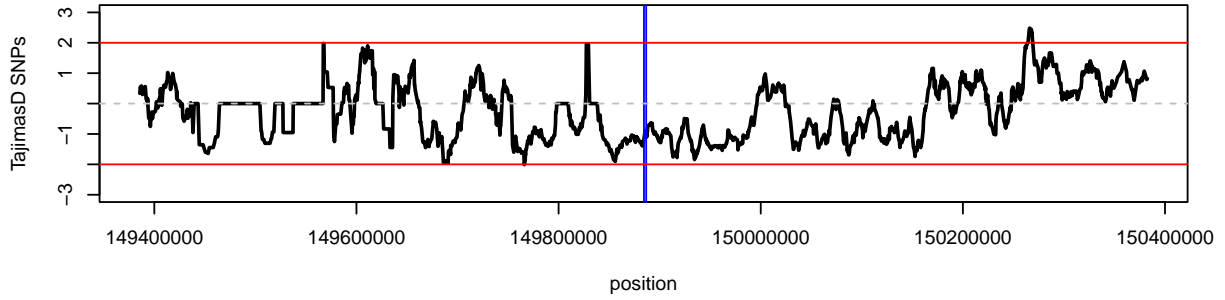

35 CHB HIST2

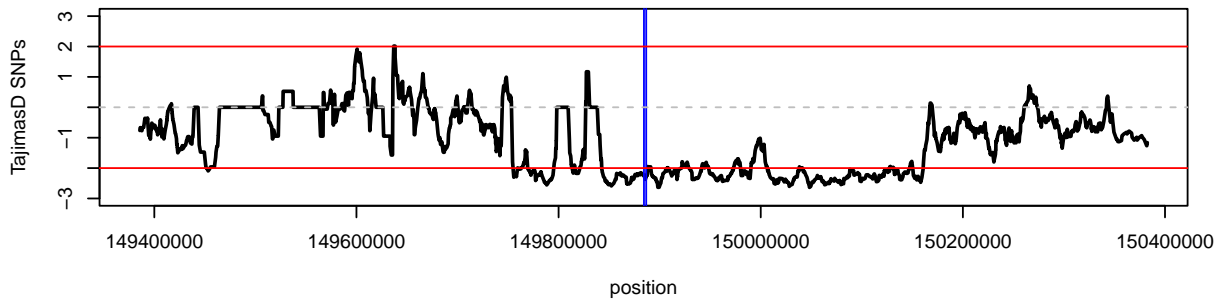

35 YRI HIST2

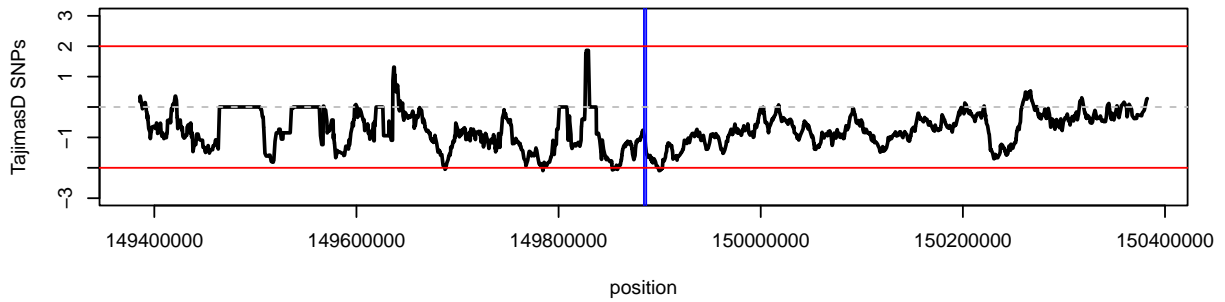



36 CEU HIST2

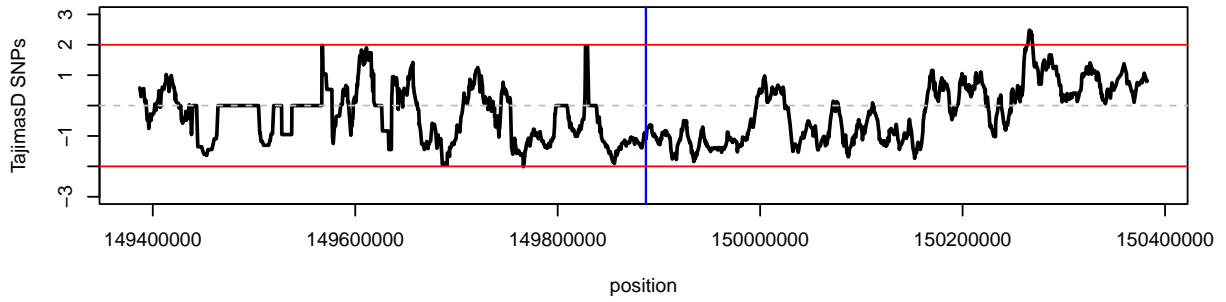

36 CHB HIST2

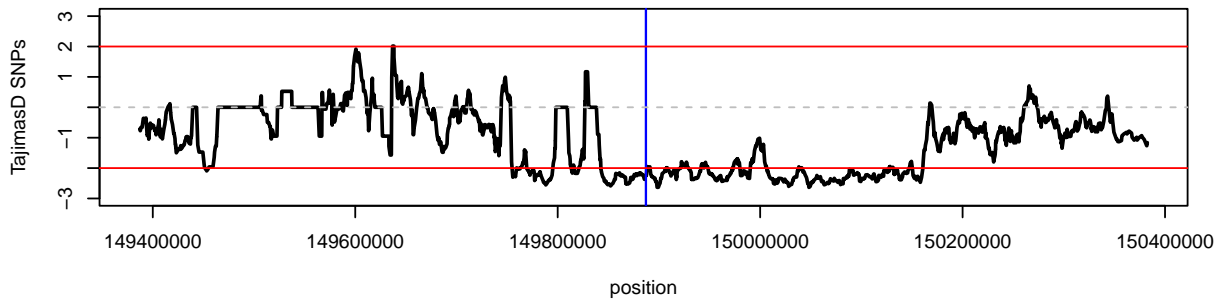

36 YRI HIST2

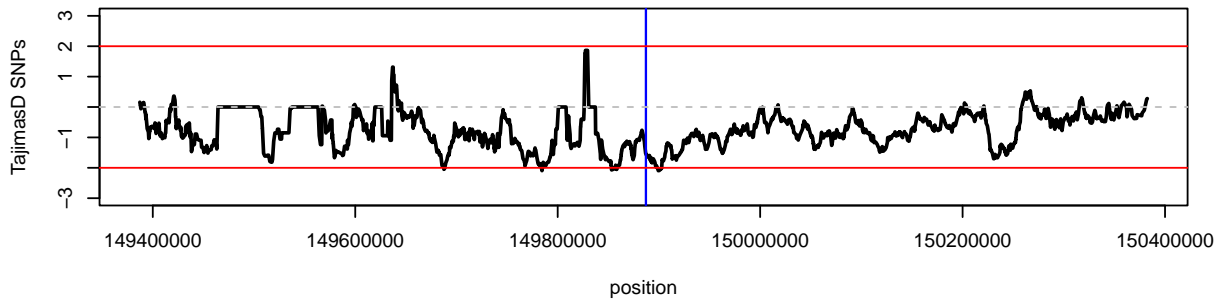

37 CEU HIST2

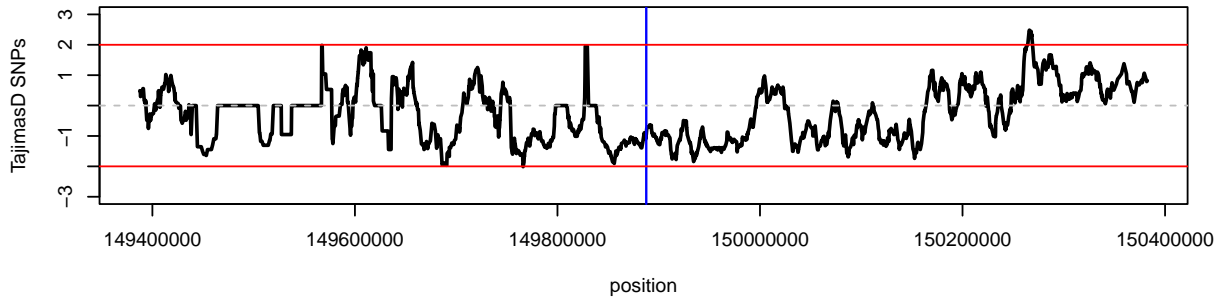

37 CHB HIST2

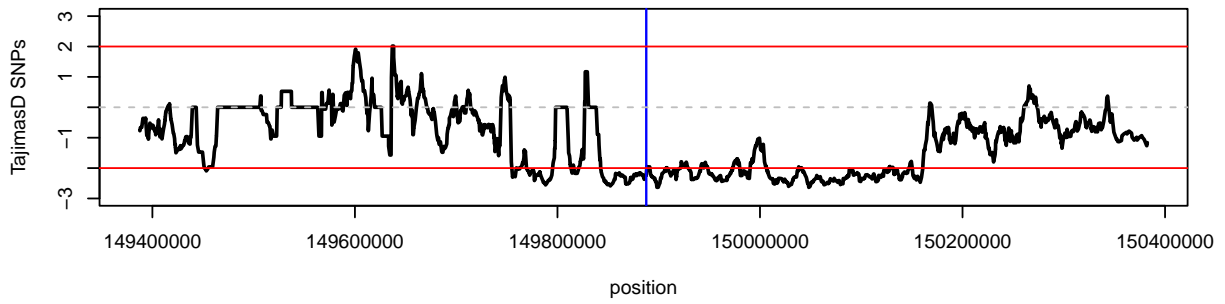

37 YRI HIST2

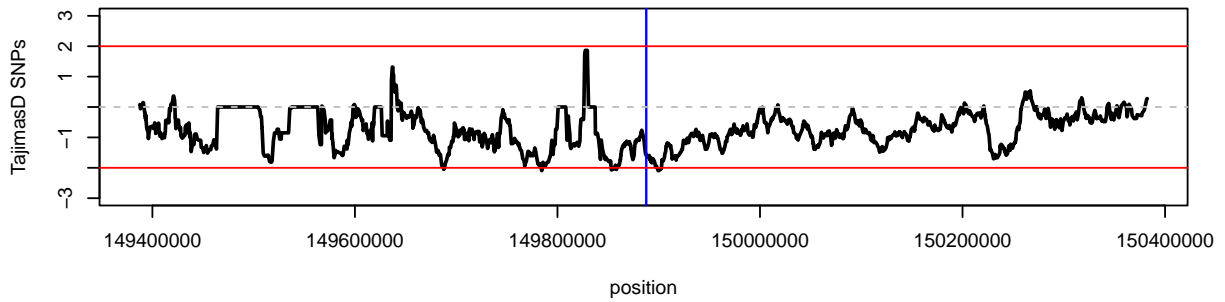

**38 CEU LIMS3**

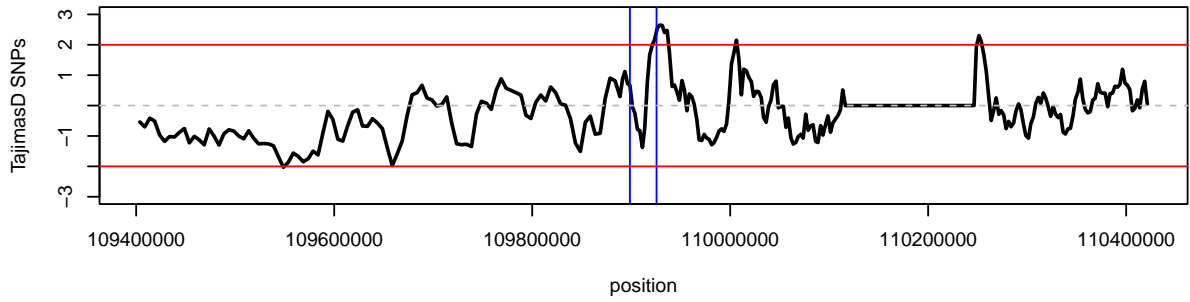

**38 CHB LIMS3**

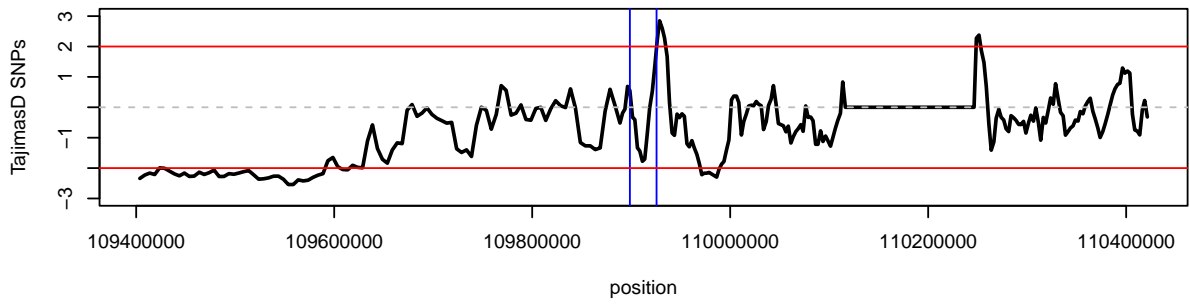

**38 YRI LIMS3**

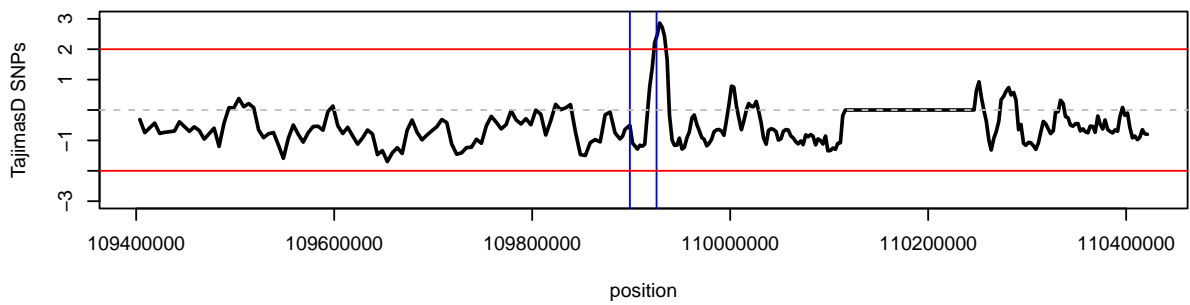

**39 CEU LIMS3**

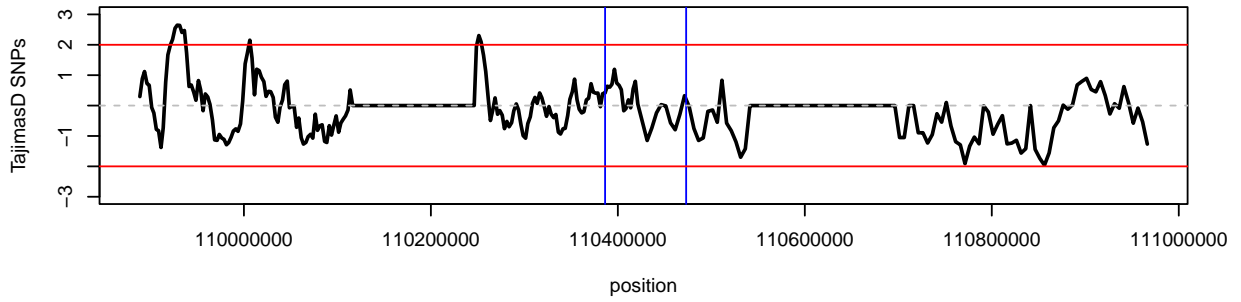

**39 CHB LIMS3**

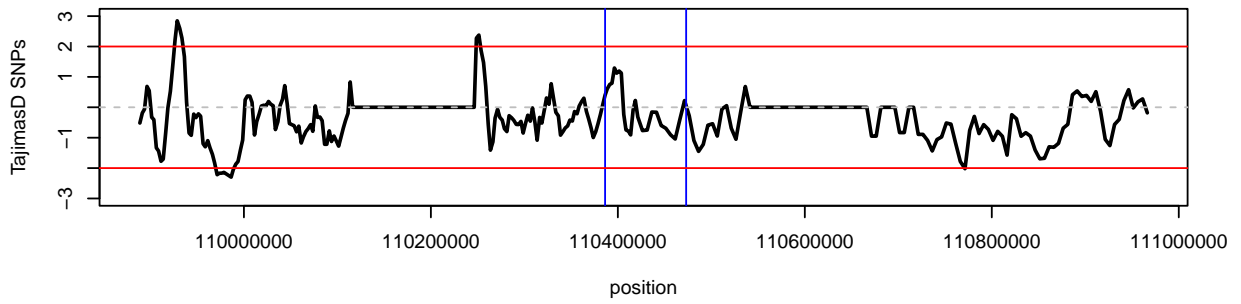

**39 YRI LIMS3**

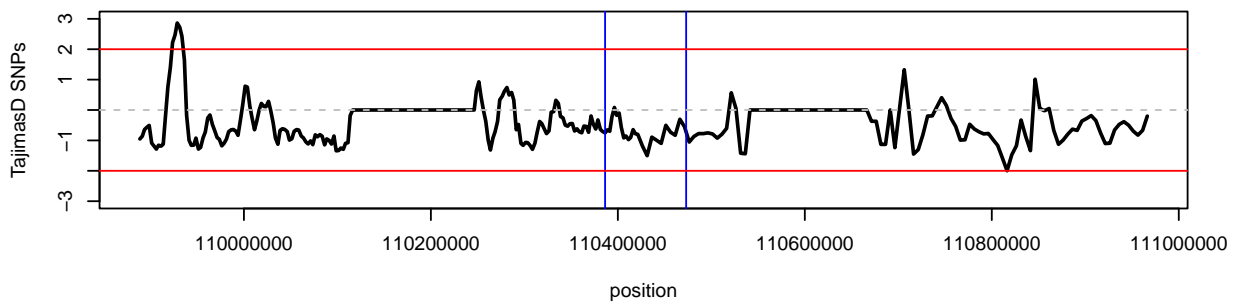

**40 CEU MUC12**

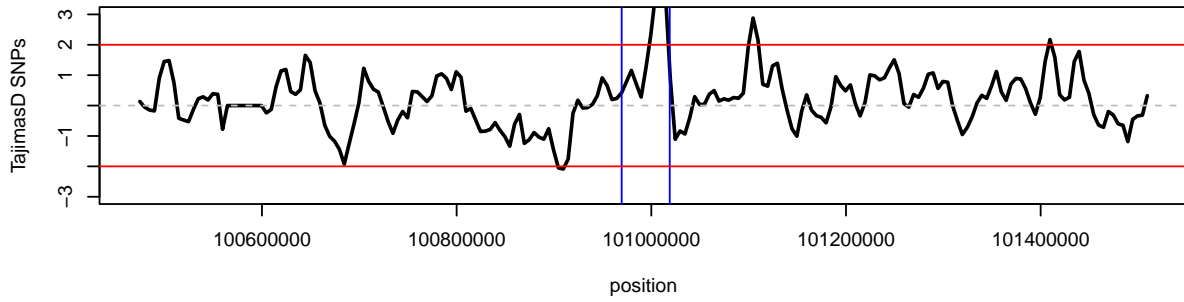

**40 CHB MUC12**

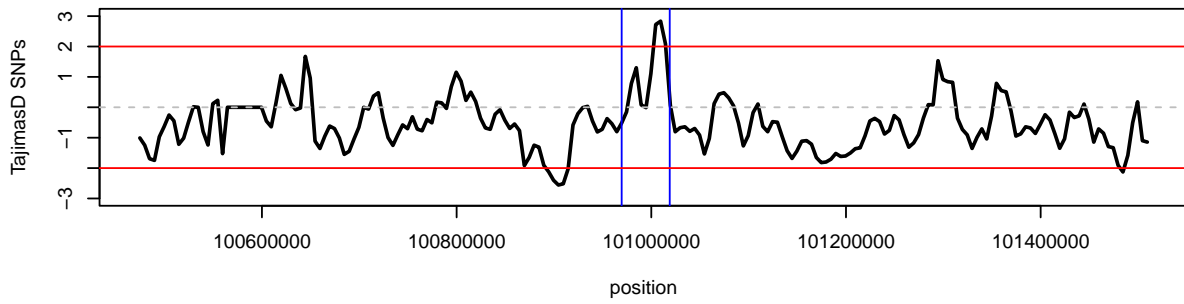

**40 YRI MUC12**

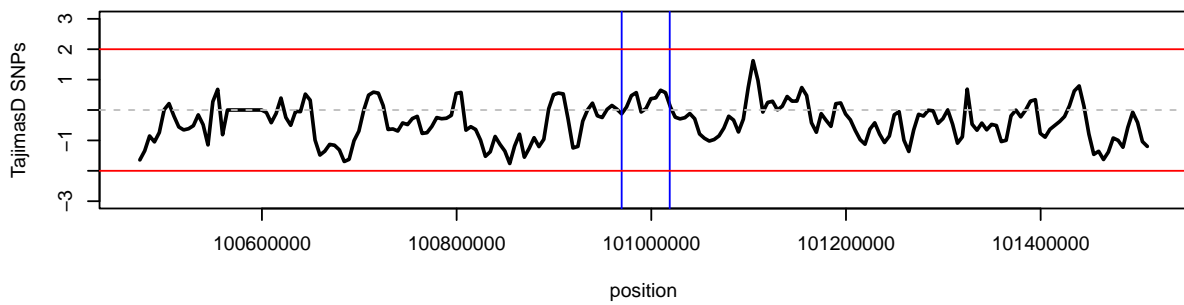

**41 CEU NBPF11**

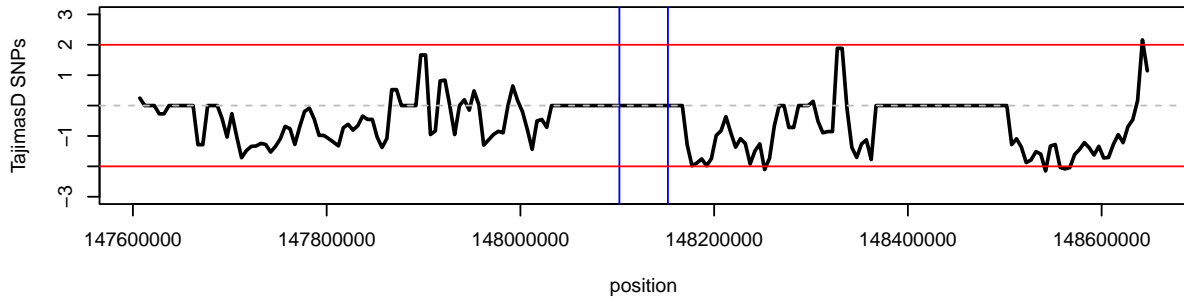

**41 CHB NBPF11**

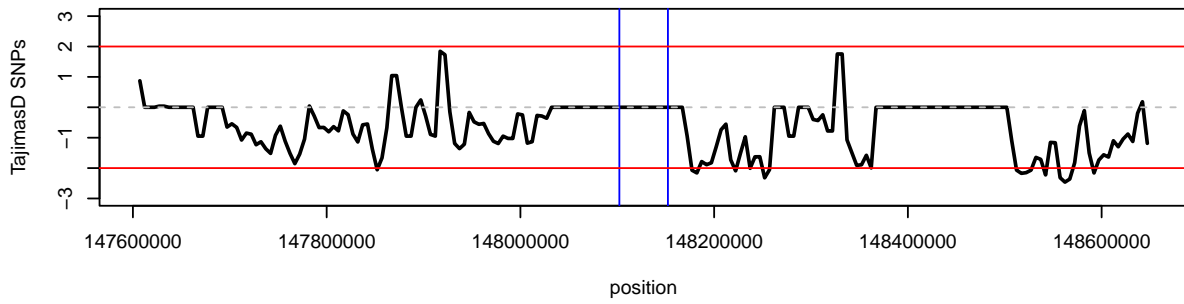

**41 YRI NBPF11**

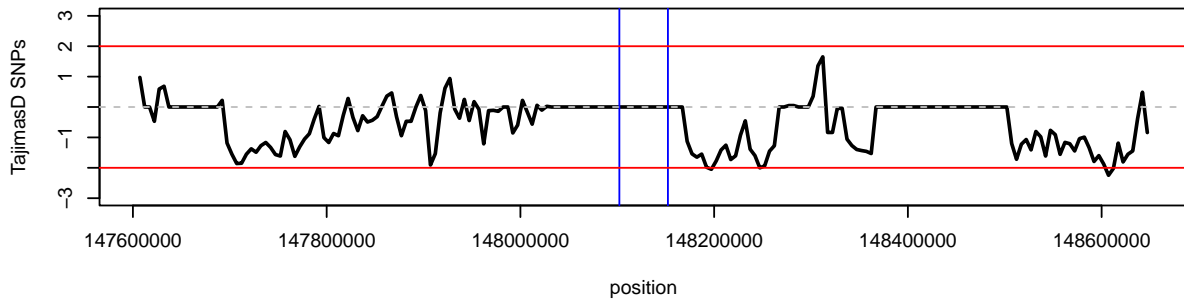

**42 CEU NBPF16**

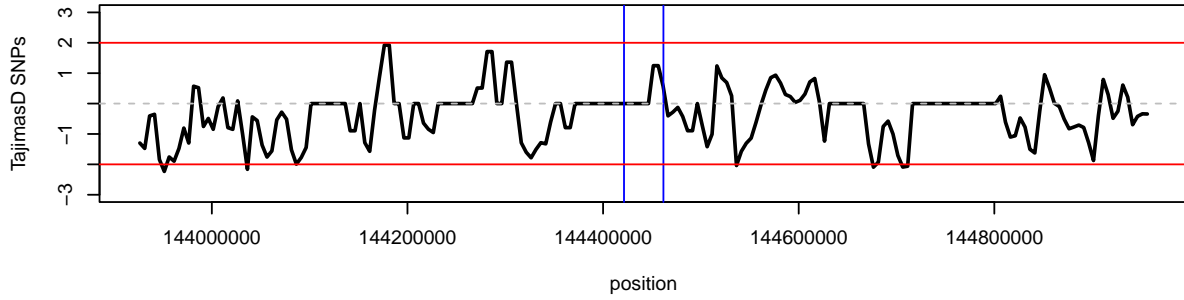

**42 CHB NBPF16**

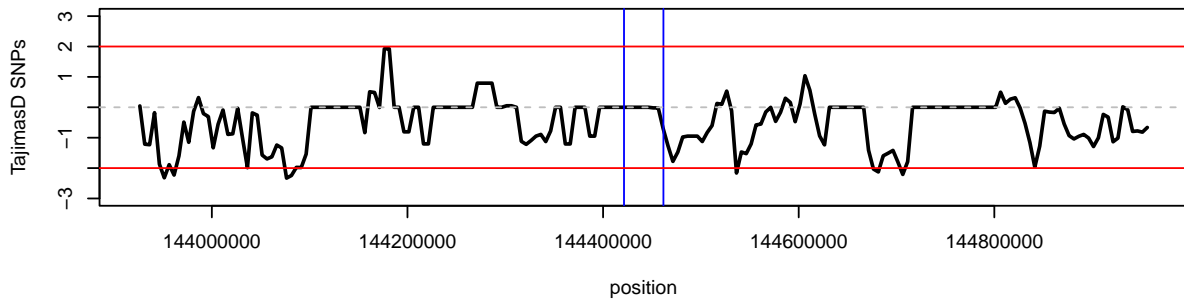

**42 YRI NBPF16**

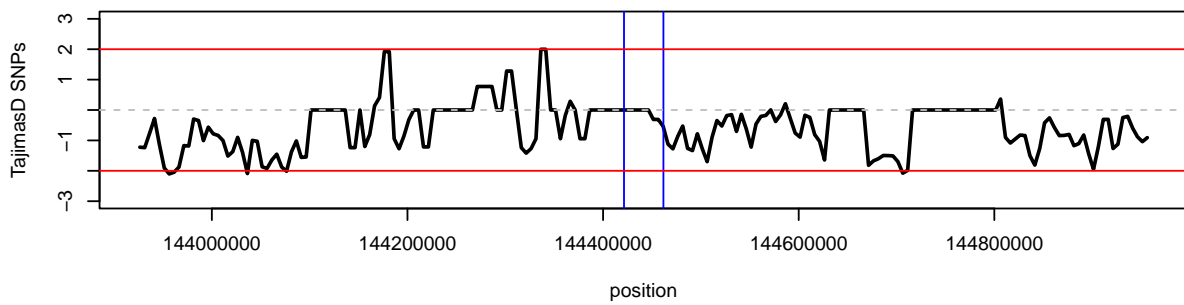

**43 CEU NPIP**

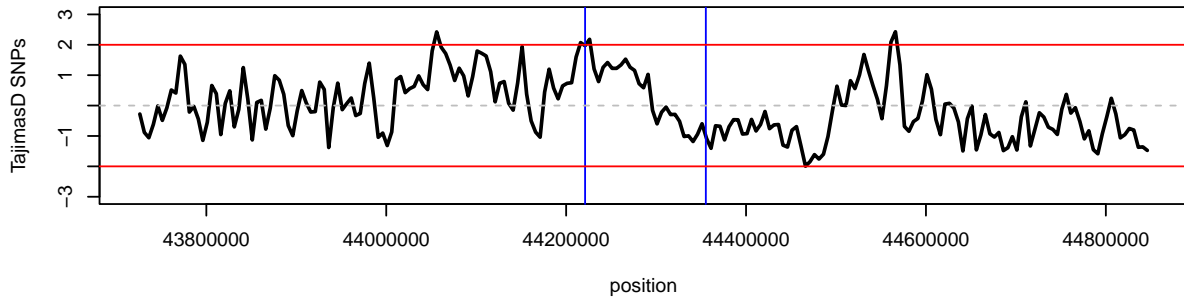

**43 CHB NPIP**

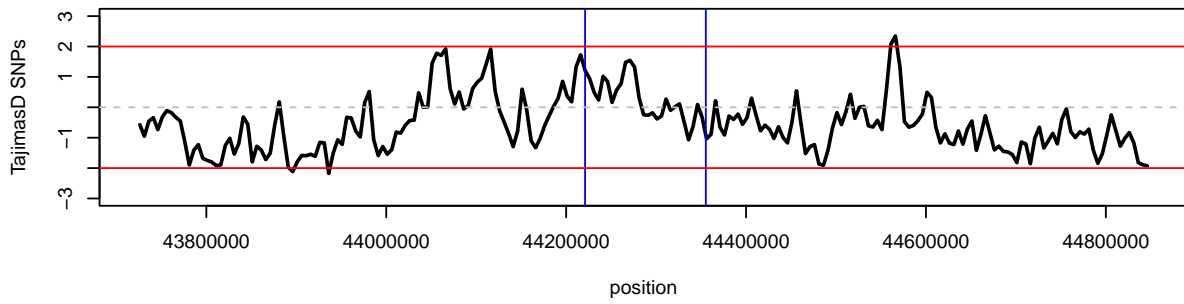

**43 YRI NPIP**

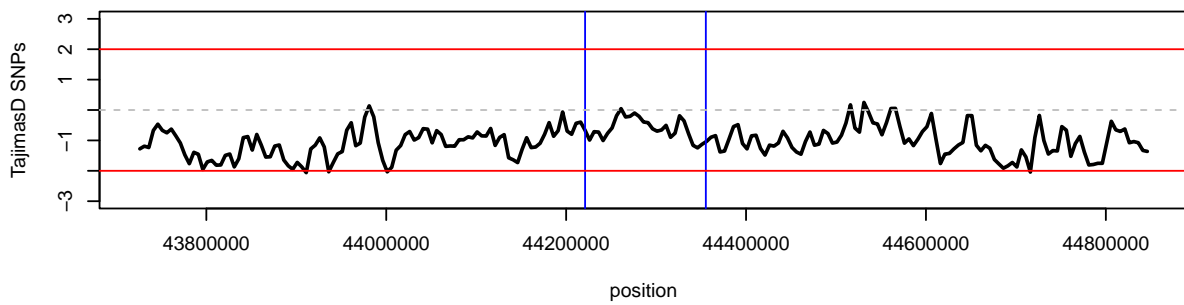



**44 CEU NPIP**

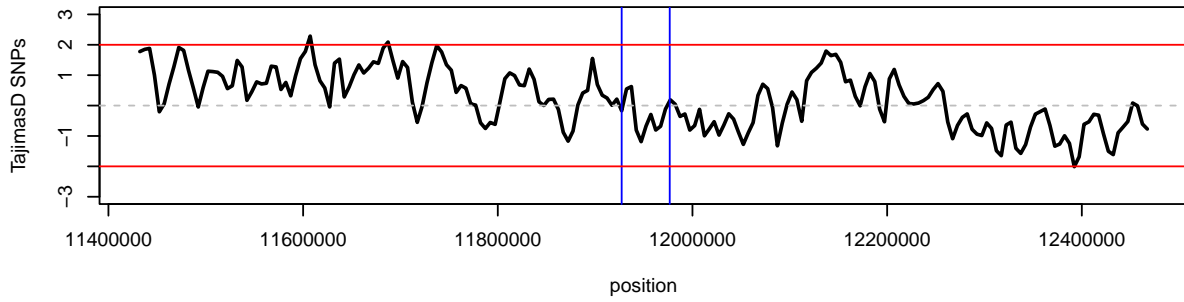

**44 CHB NPIP**

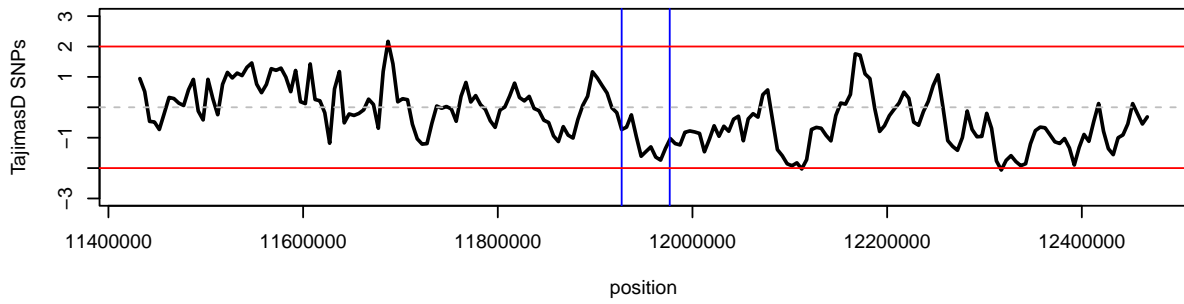

**44 YRI NPIP**

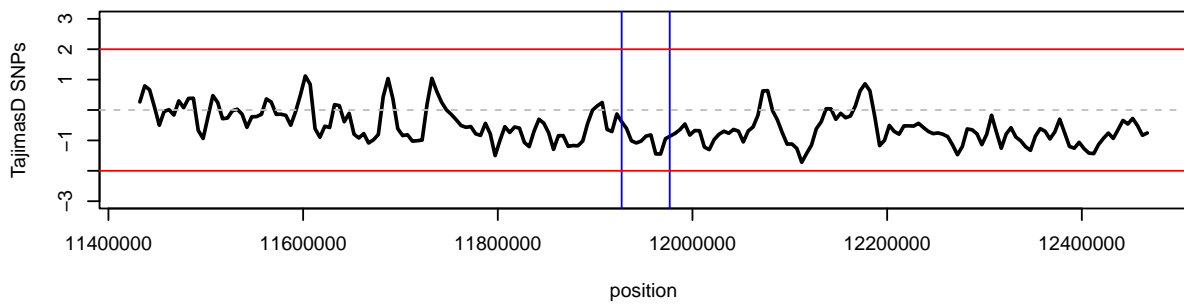

**45 CEU NPIP**

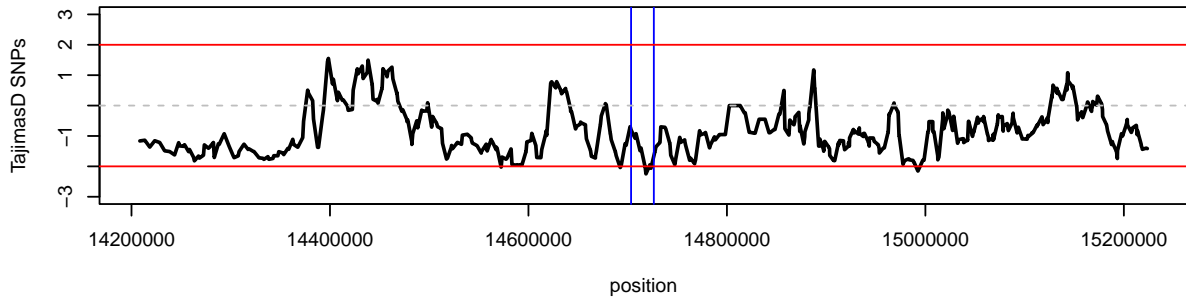

**45 CHB NPIP**

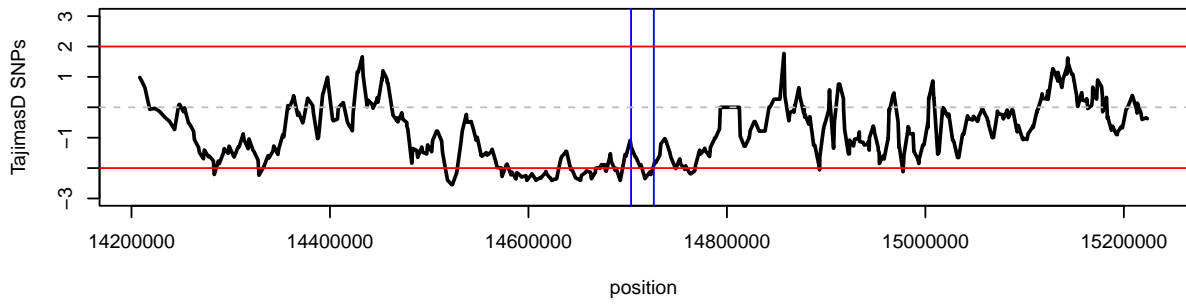

**45 YRI NPIP**

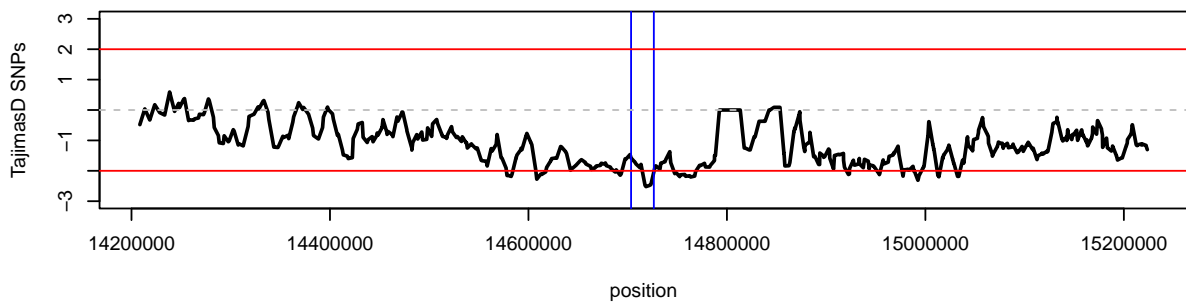

**46 CEU NPIP**

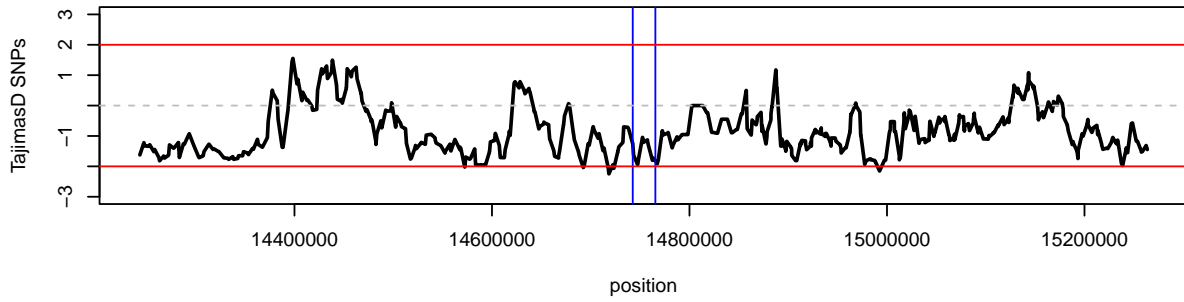

**46 CHB NPIP**

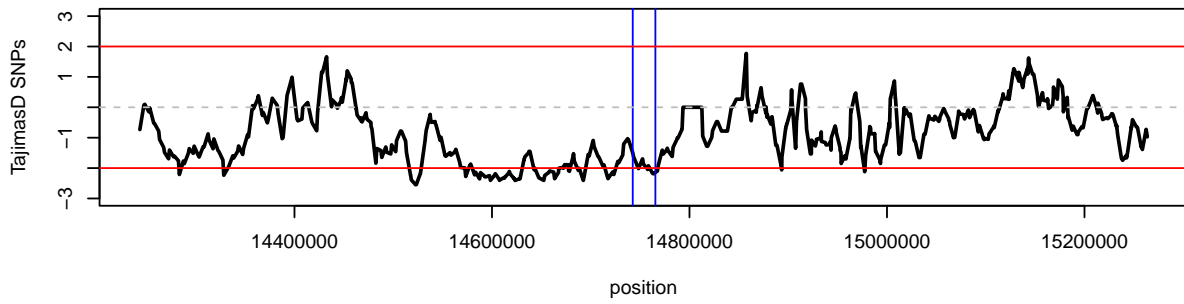

**46 YRI NPIP**

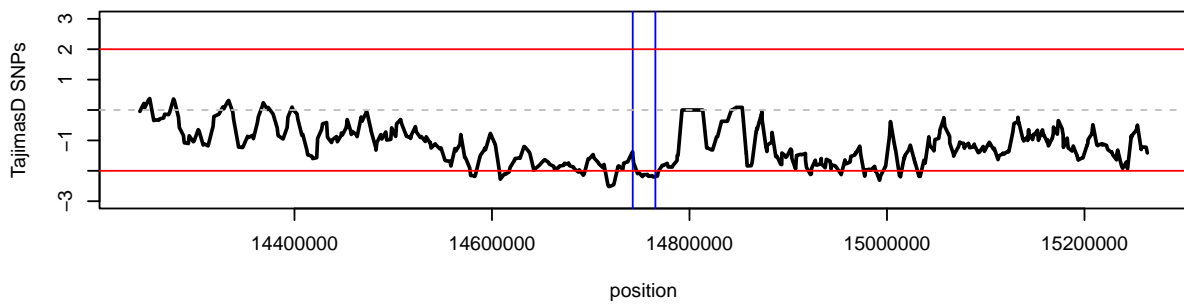

**47 CEU NPIP**

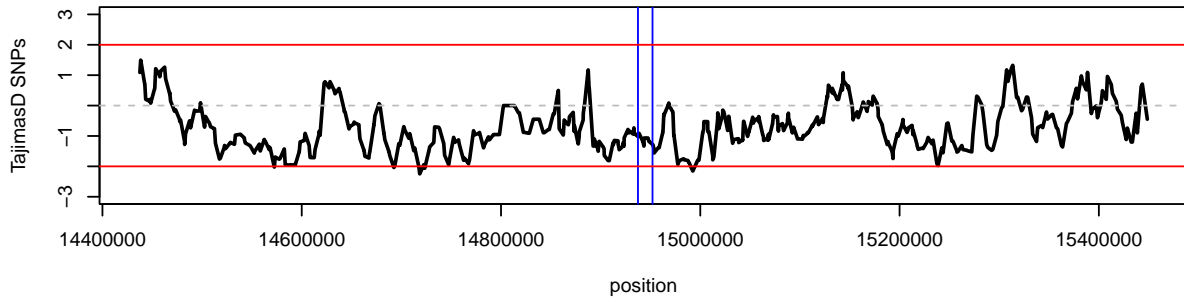

**47 CHB NPIP**

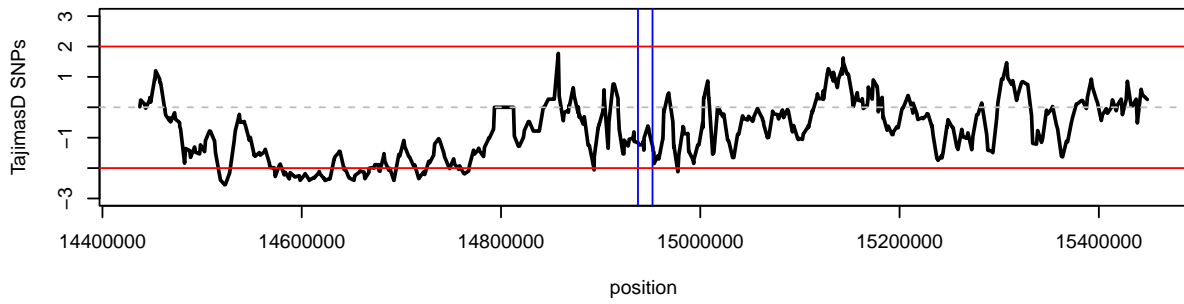

**47 YRI NPIP**

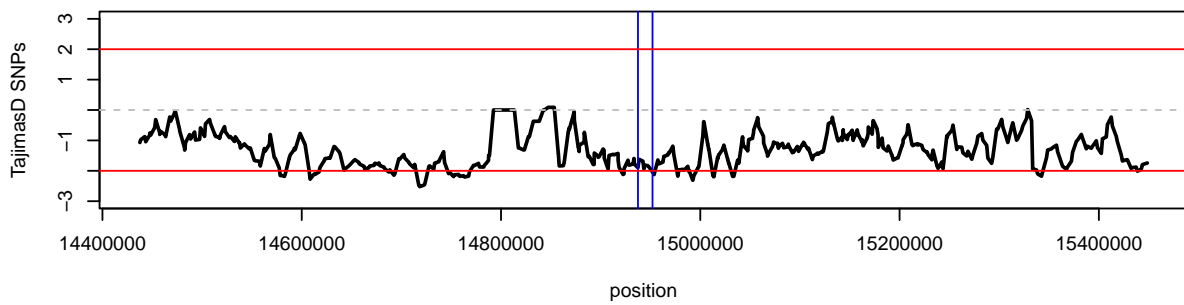

**48 CEU NPIP**

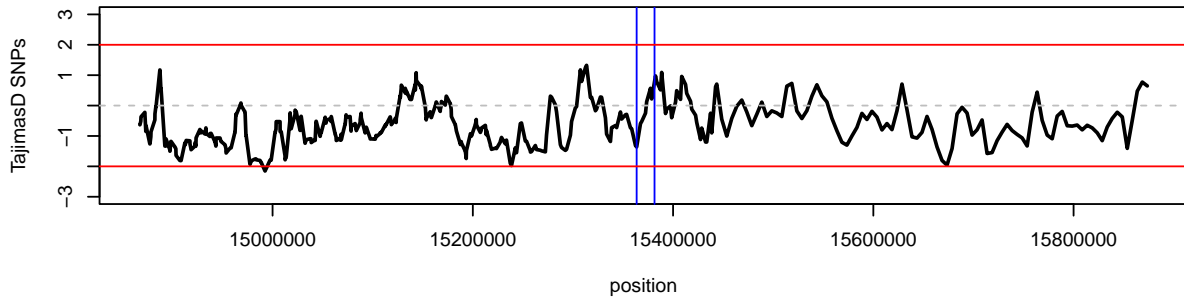

**48 CHB NPIP**

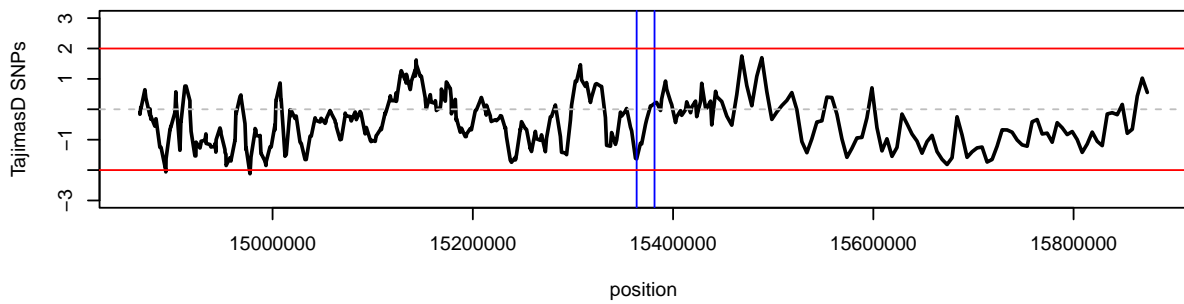

**48 YRI NPIP**

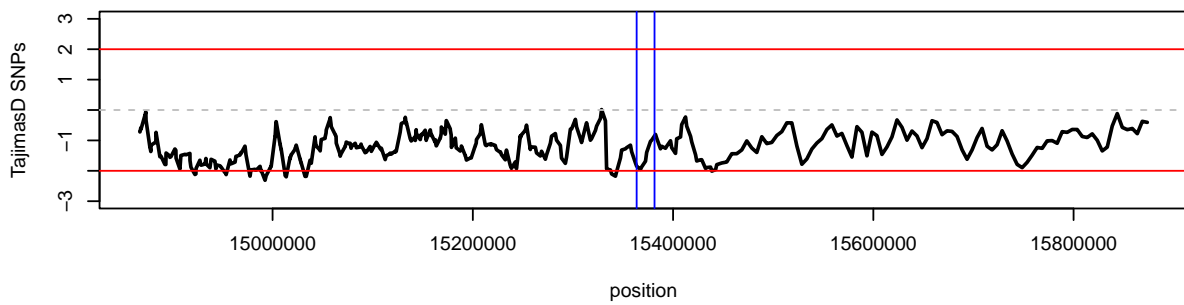

**49 CEU NPIP**

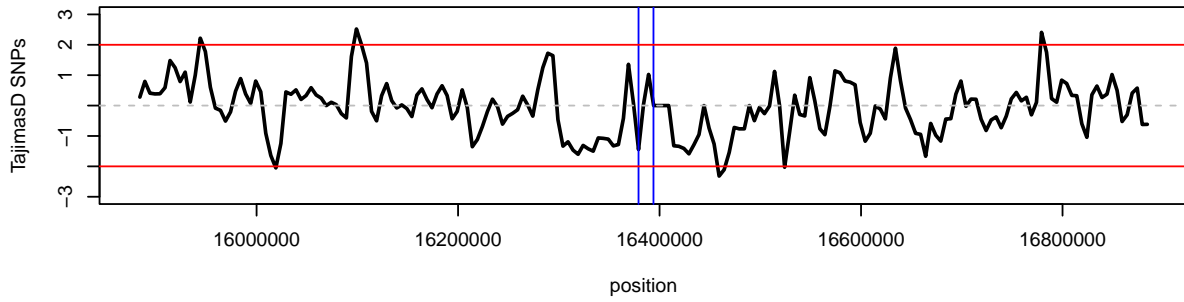

**49 CHB NPIP**

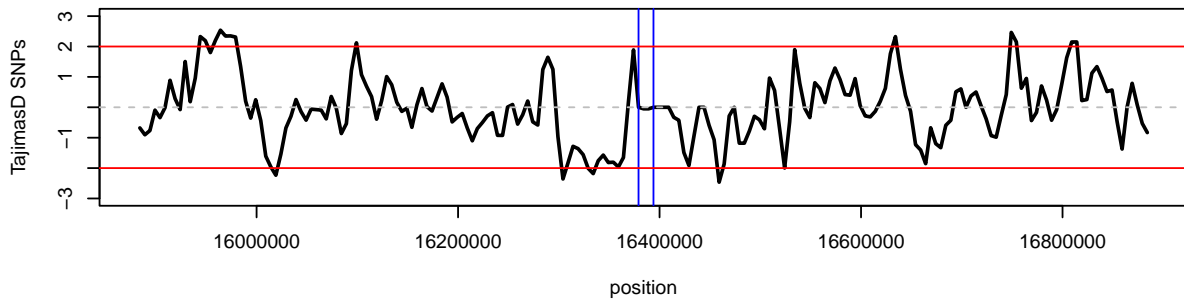

**49 YRI NPIP**

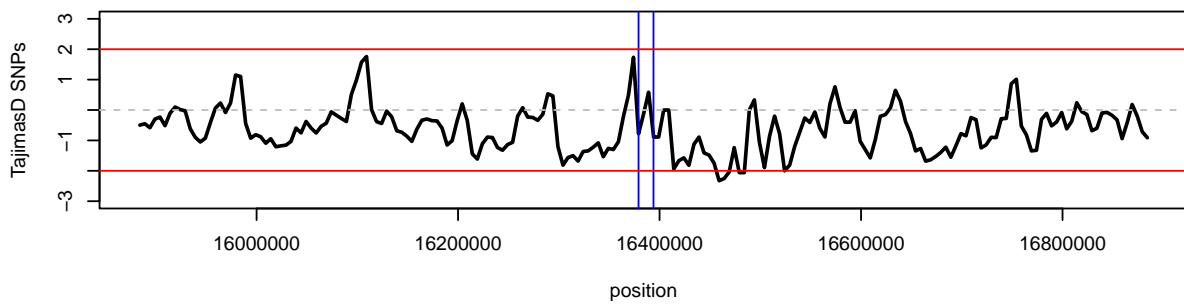

**50 CEU NPIP**

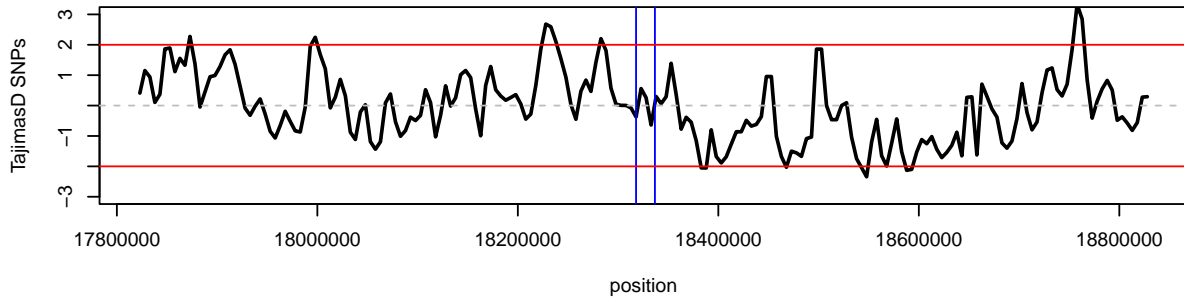

**50 CHB NPIP**

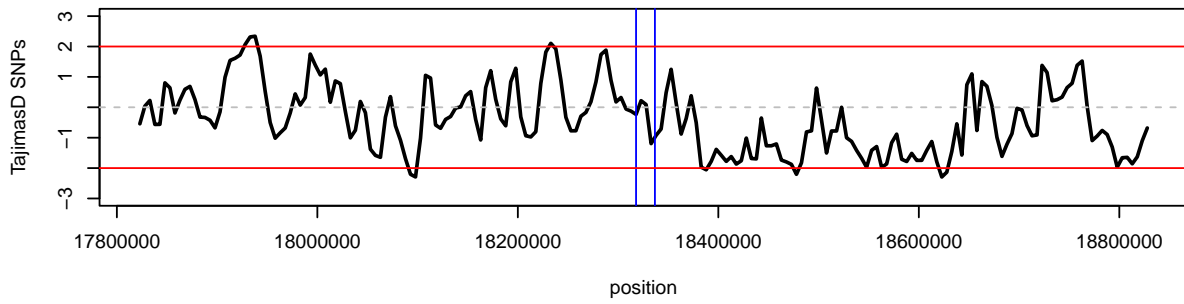

**50 YRI NPIP**

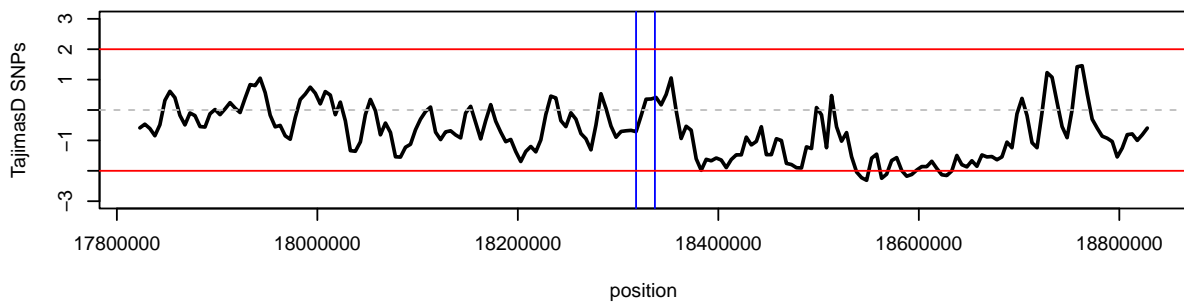

**51 CEU NPIP**

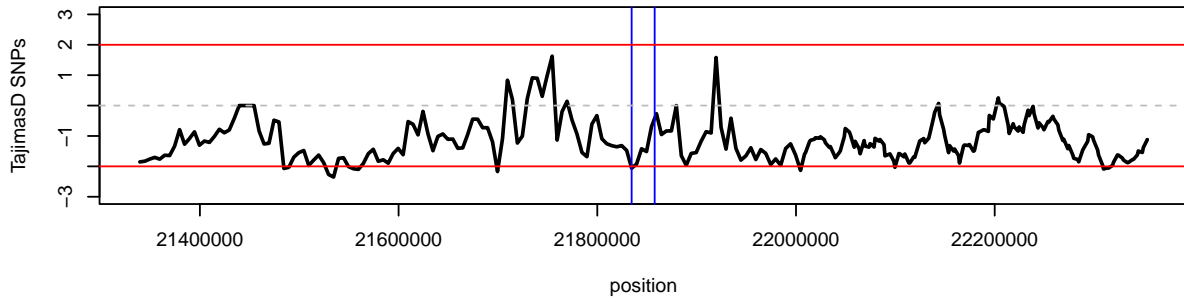

**51 CHB NPIP**

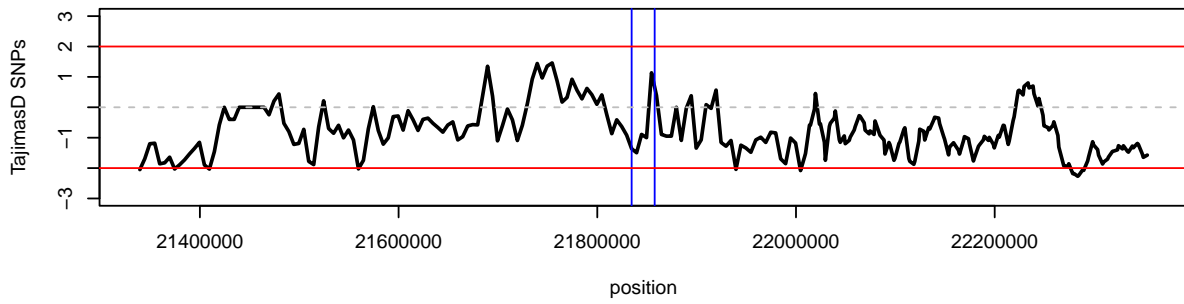

**51 YRI NPIP**

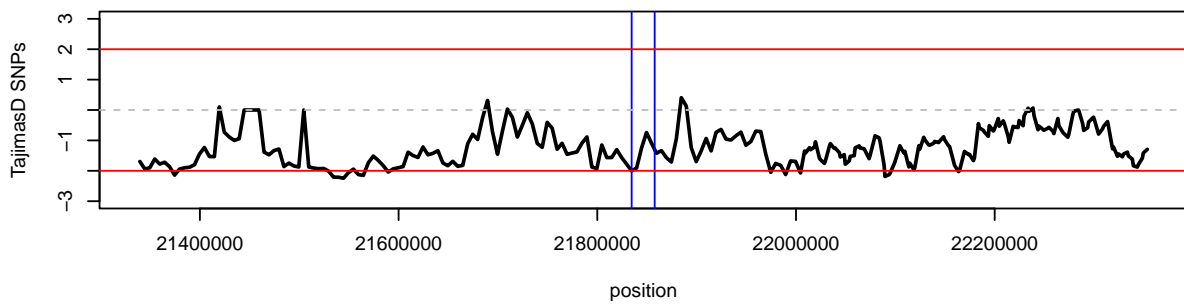



**52 CEU NPIP**

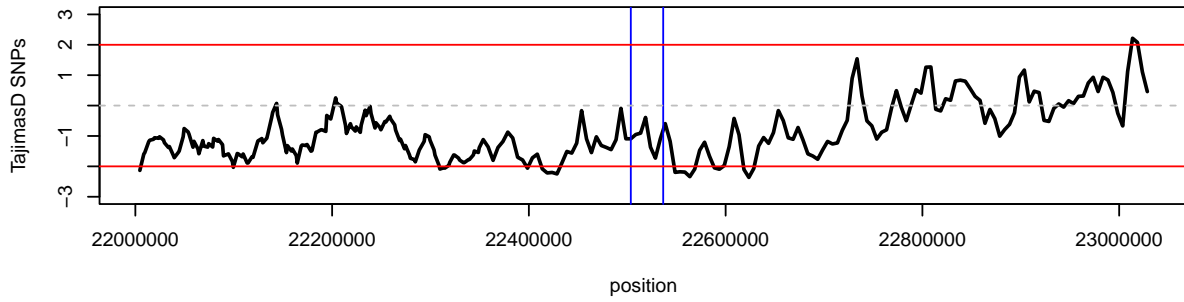

**52 CHB NPIP**

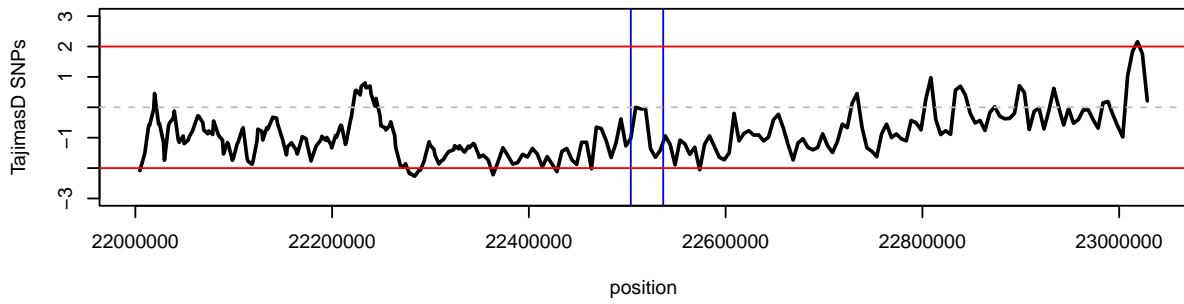

**52 YRI NPIP**

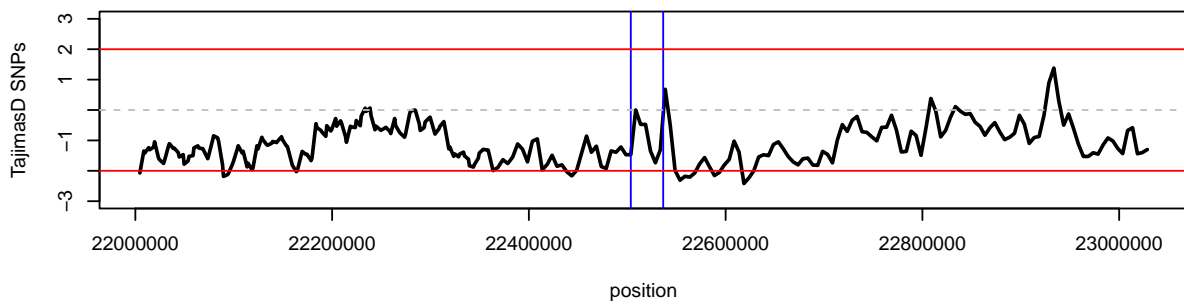

**53 CEU NPIP**

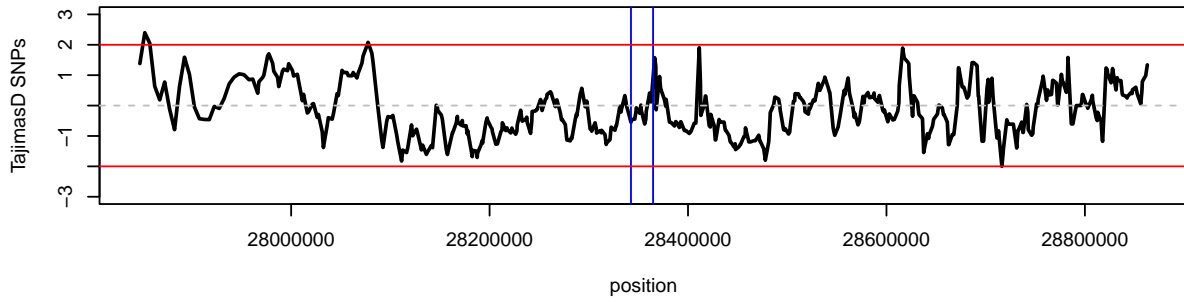

**53 CHB NPIP**

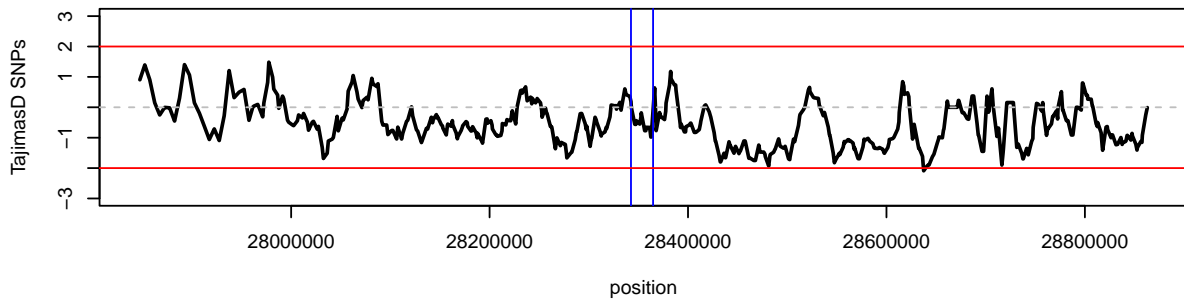

**53 YRI NPIP**

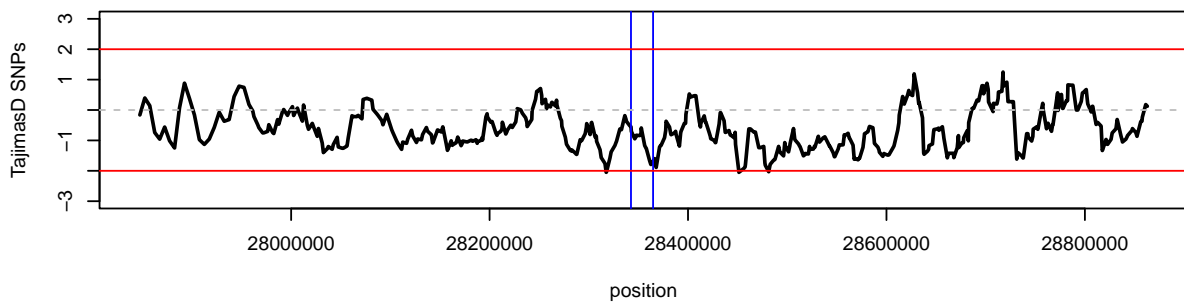

**54 CEU NPIP**

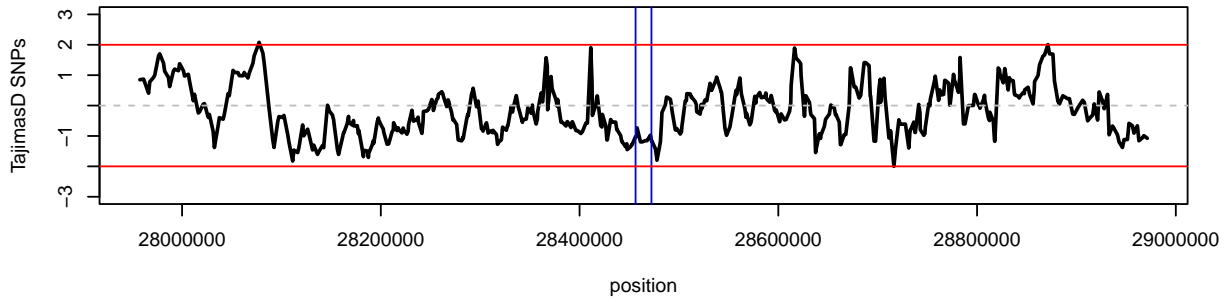

**54 CHB NPIP**

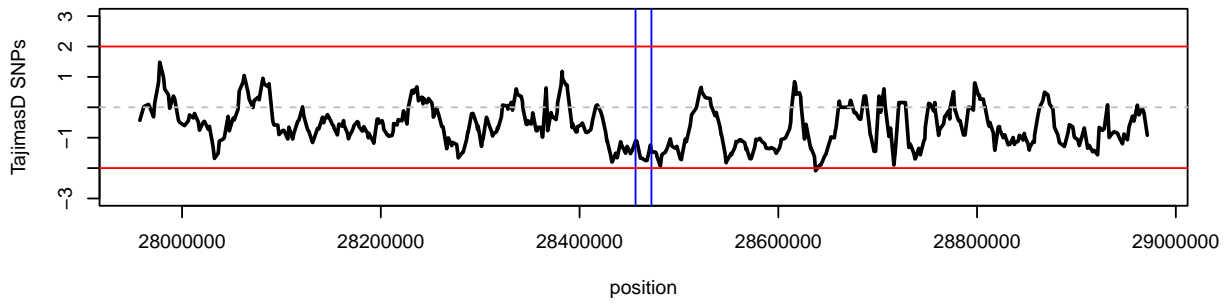

**54 YRI NPIP**

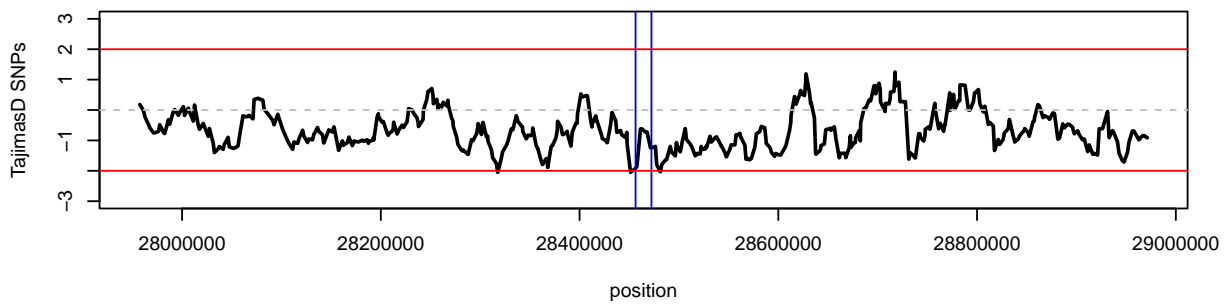

**55 CEU NPIP**

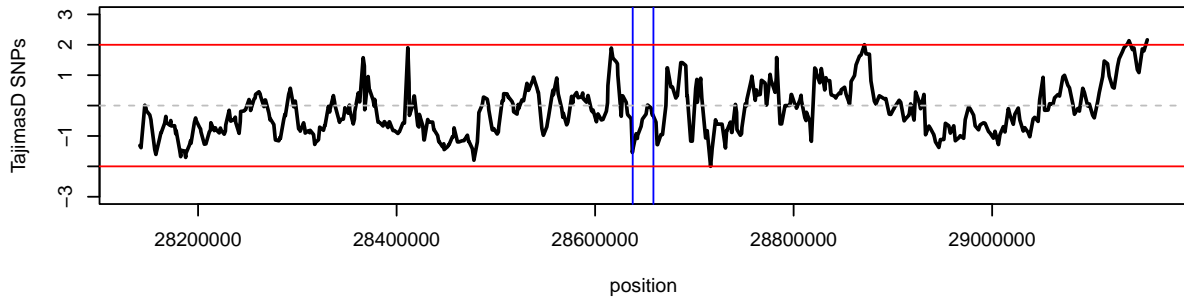

**55 CHB NPIP**

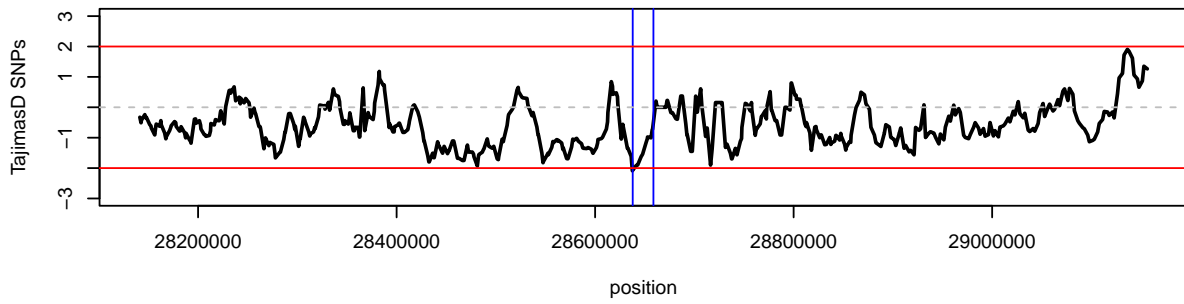

**55 YRI NPIP**

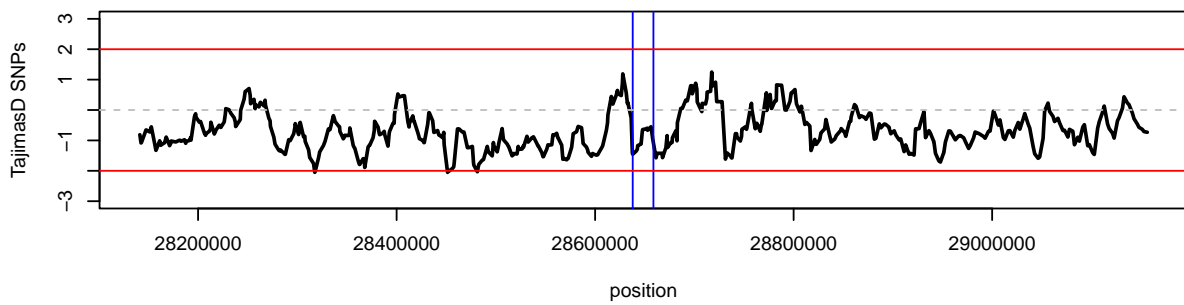

**56 CEU NPIP**

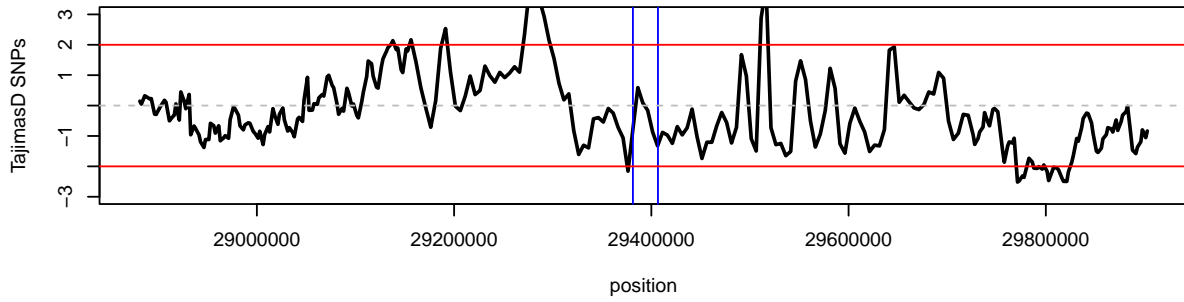

**56 CHB NPIP**

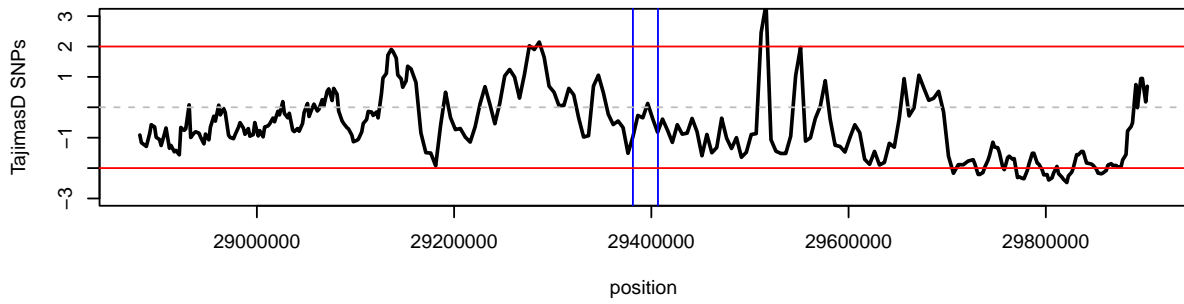

**56 YRI NPIP**

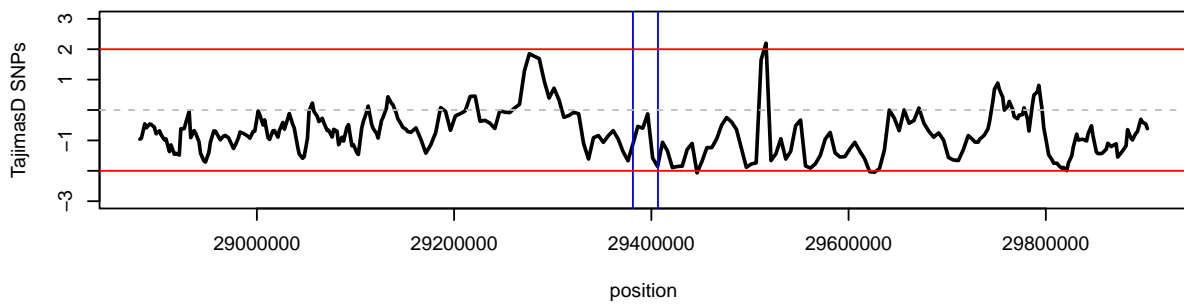

**57 CEU NPIP**

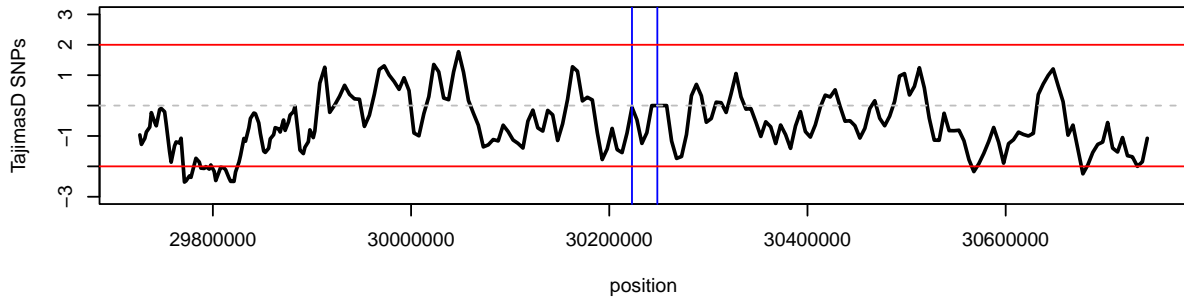

**57 CHB NPIP**

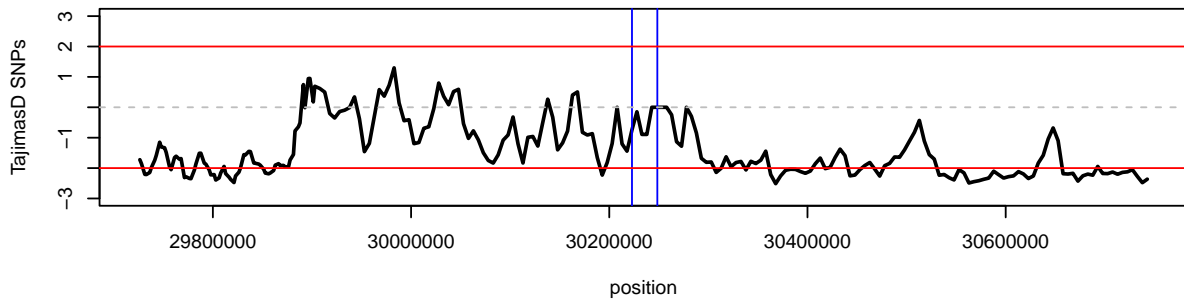

**57 YRI NPIP**

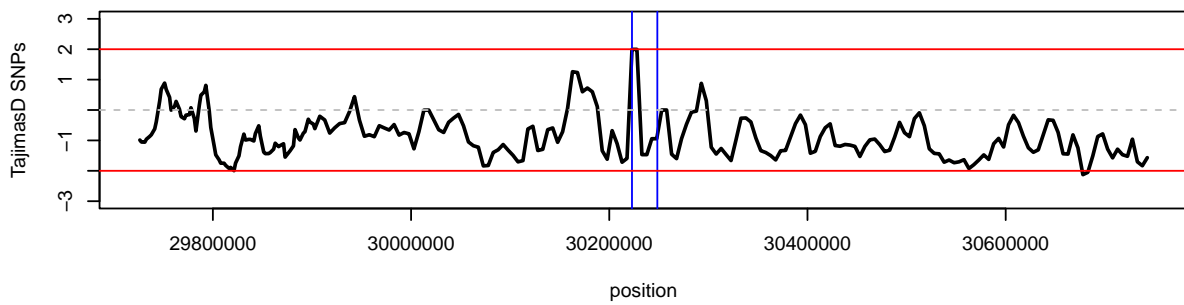

**58 CEU NPIP**

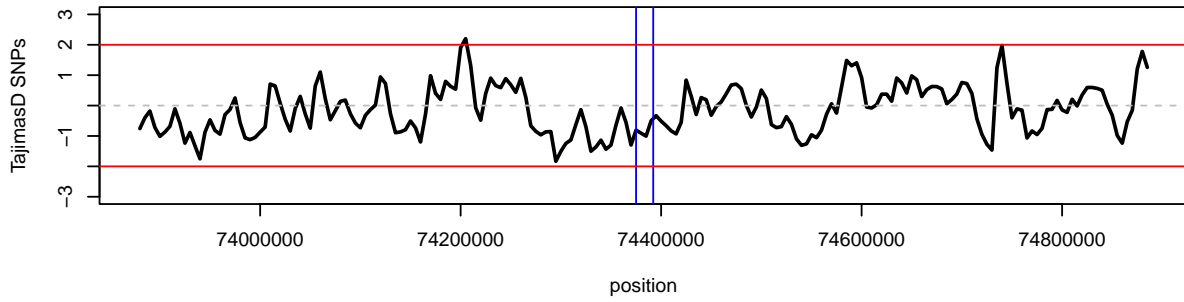

**58 CHB NPIP**

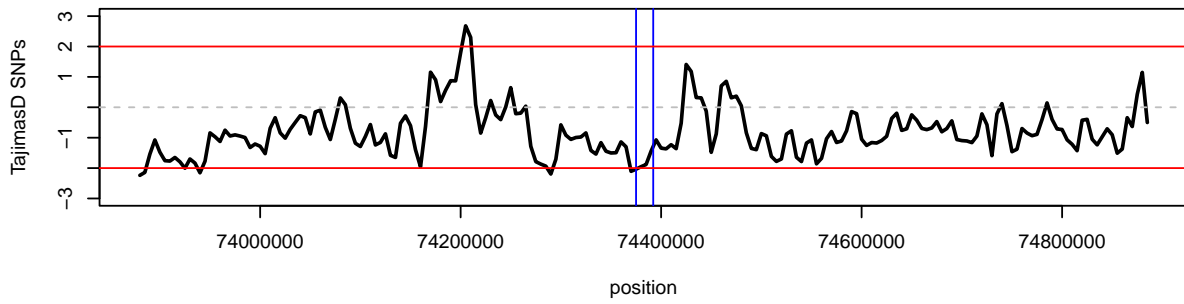

**58 YRI NPIP**

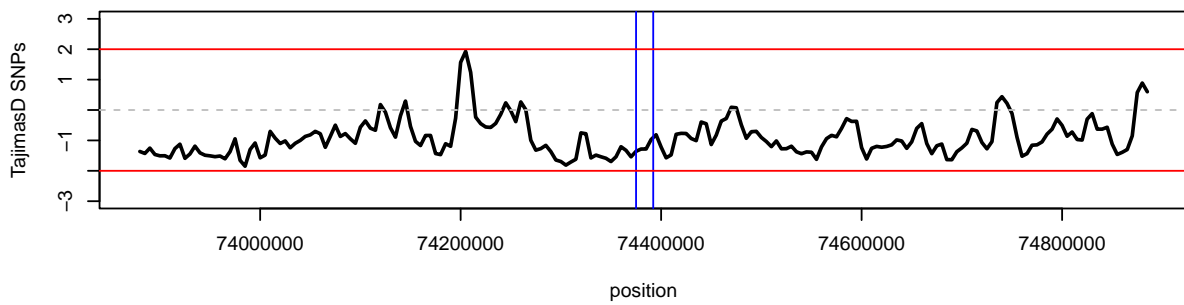

**59 CEU PGA3**

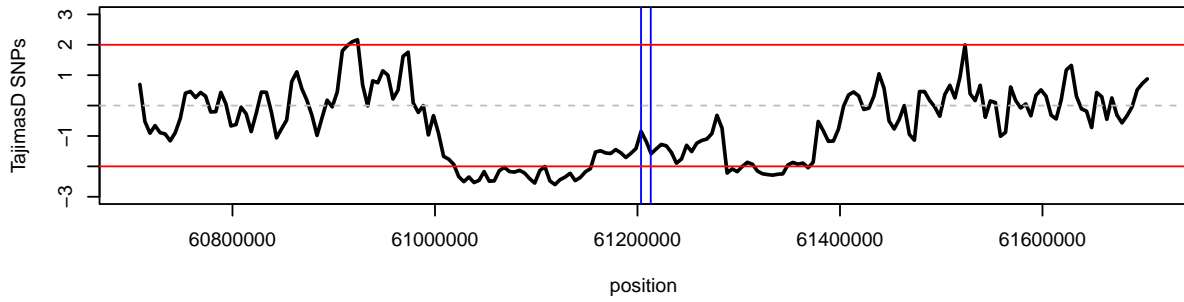

**59 CHB PGA3**

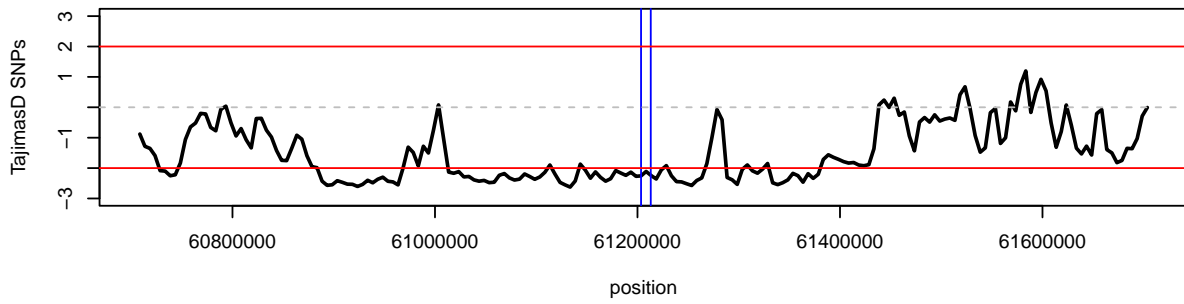

**59 YRI PGA3**

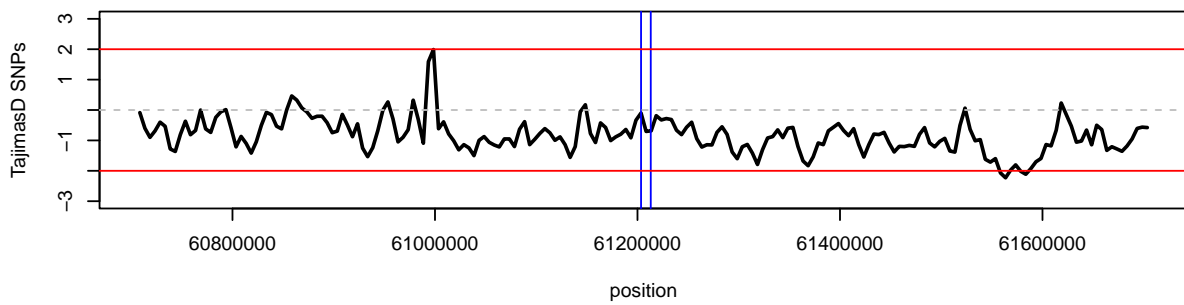



**60 CEU PRAMEF14**

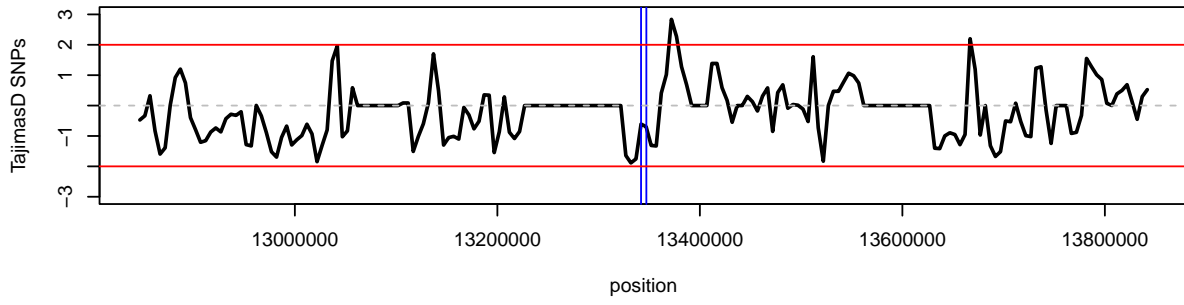

**60 CHB PRAMEF14**

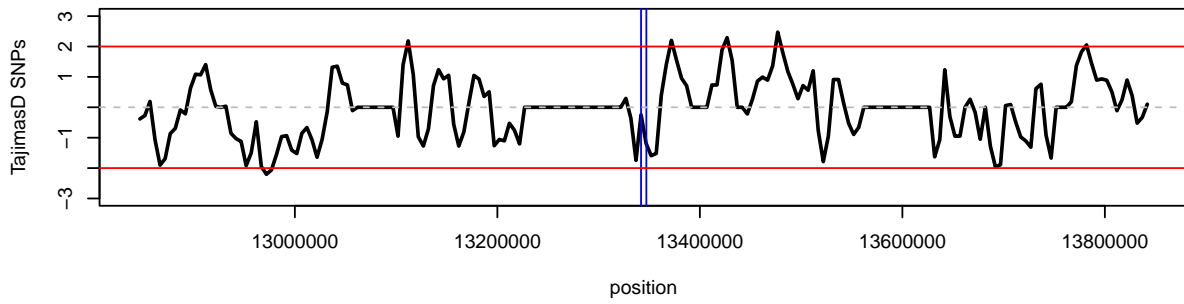

**60 YRI PRAMEF14**

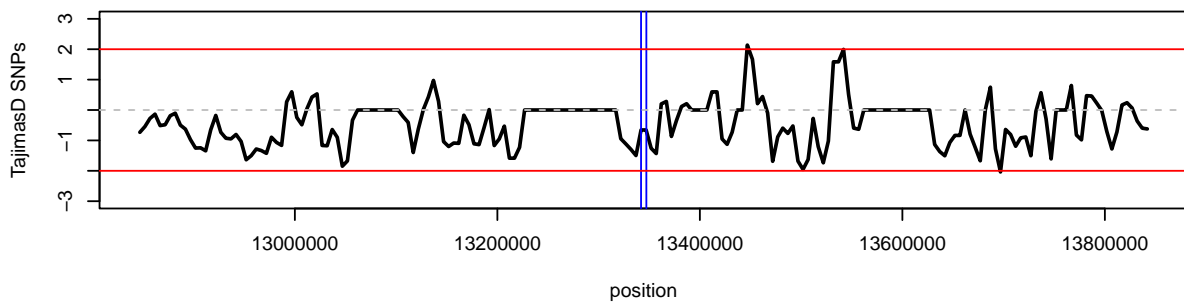

61 CEU PRAMEF20

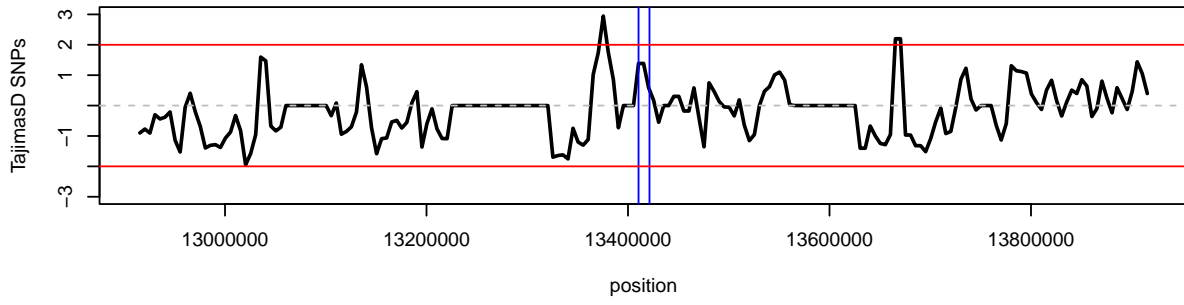

61 CHB PRAMEF20

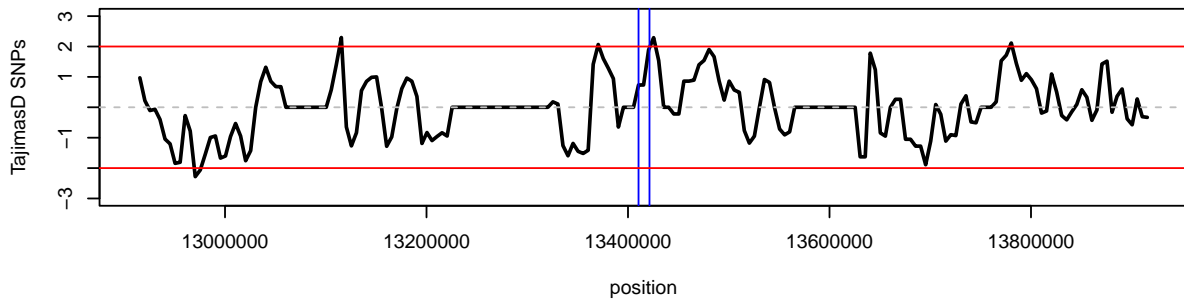

61 YRI PRAMEF20

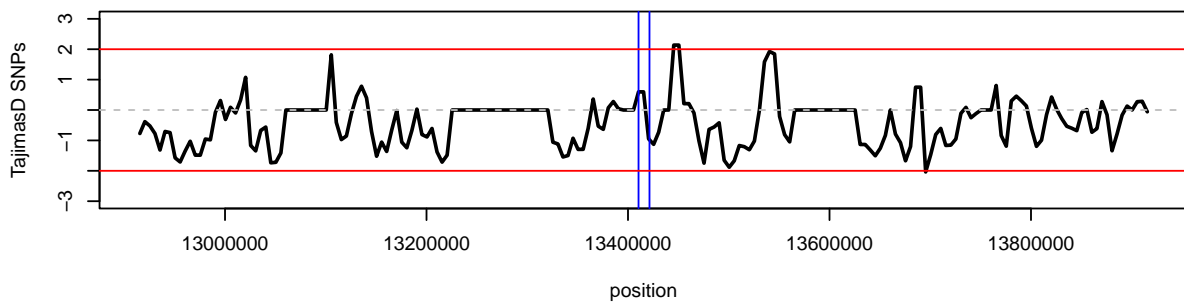

**62 CEU PRAMEF5**

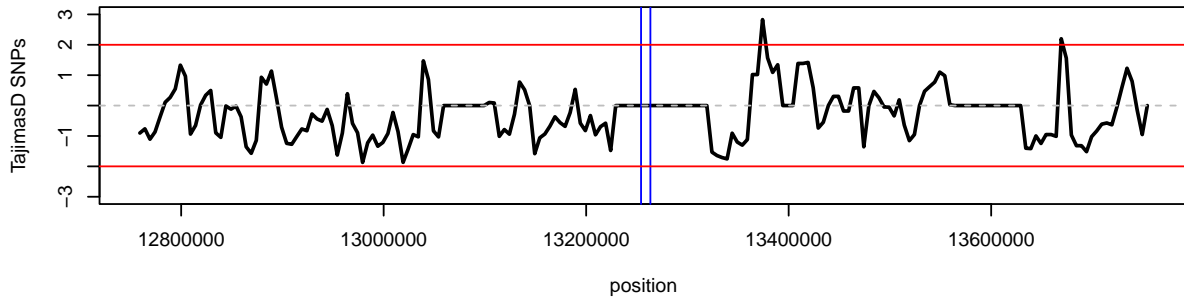

**62 CHB PRAMEF5**

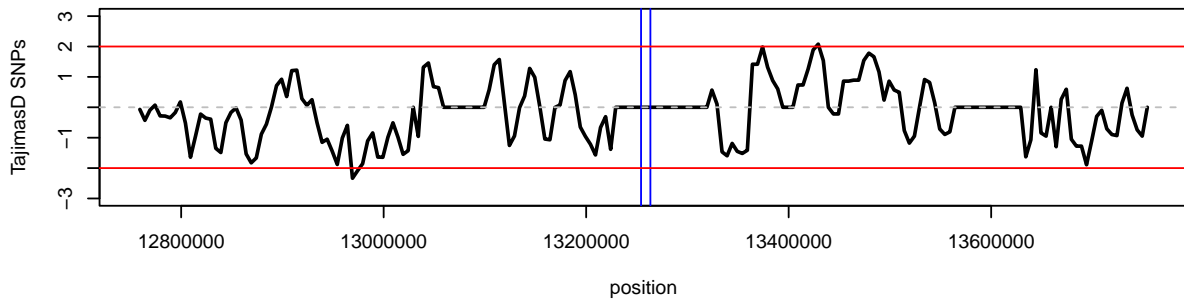

**62 YRI PRAMEF5**

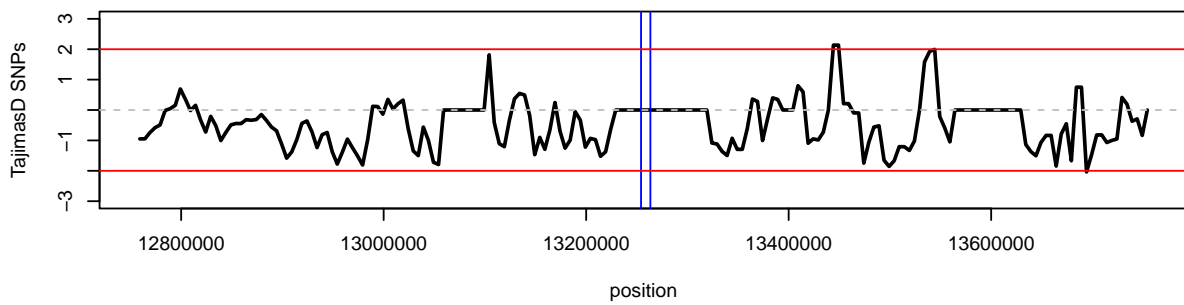

**63 CEU PRAMEF8**

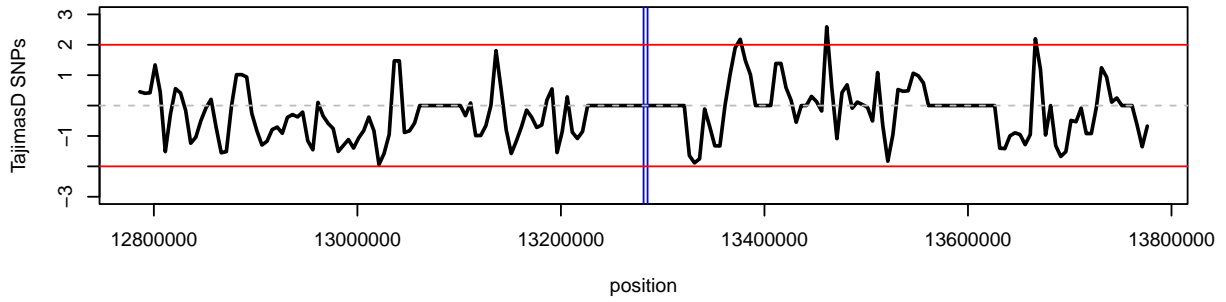

**63 CHB PRAMEF8**

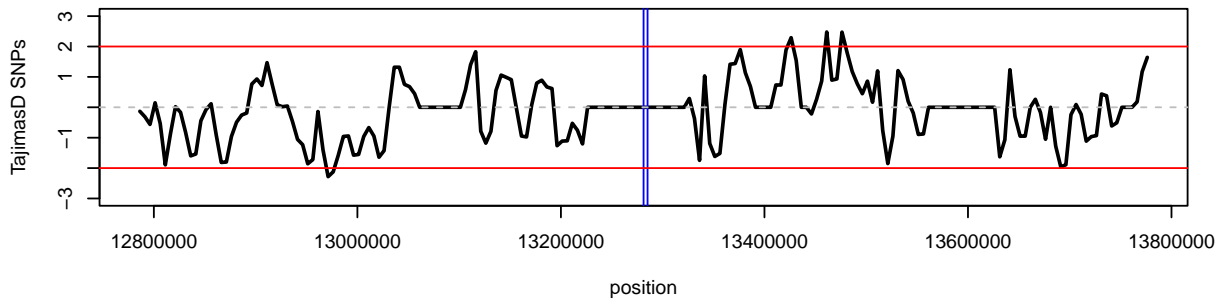

**63 YRI PRAMEF8**

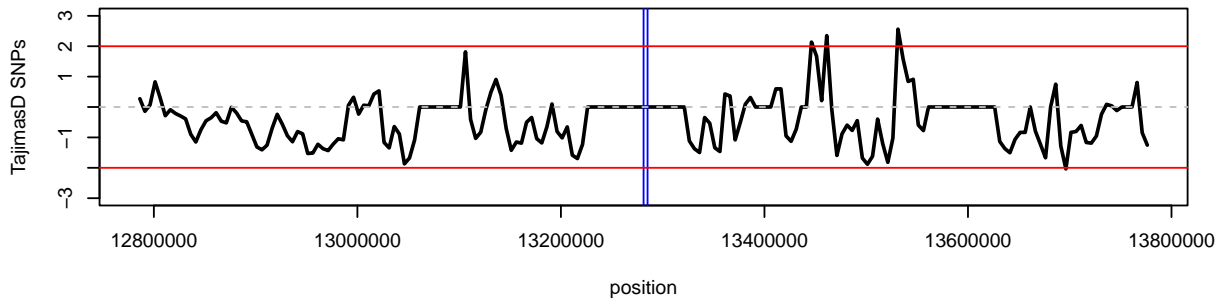

**64 CEU PRR11**

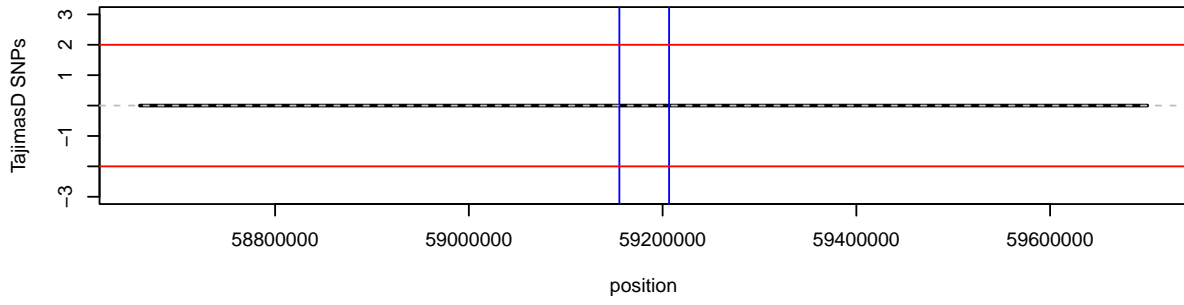

**64 CHB PRR11**

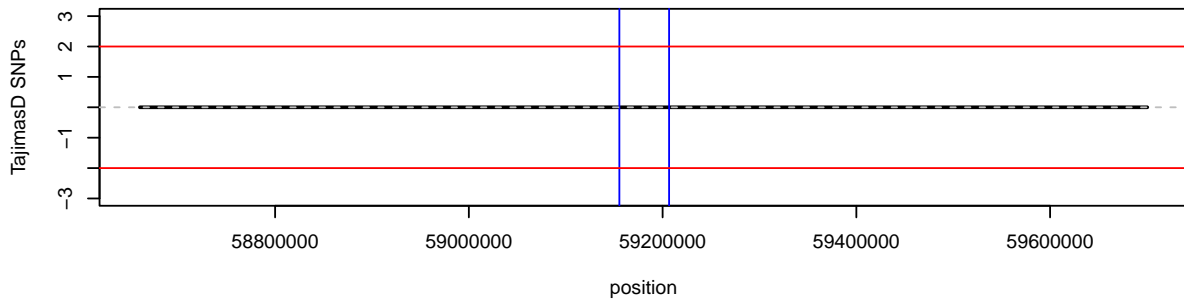

**64 YRI PRR11**

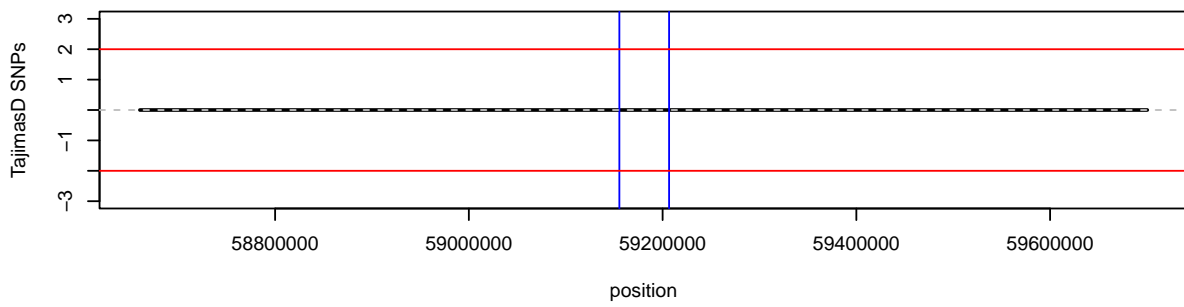

65 CEU PRR20A

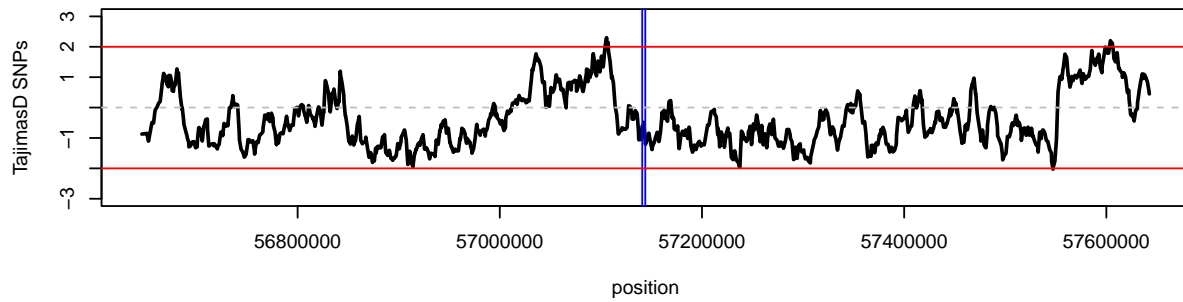

65 CHB PRR20A

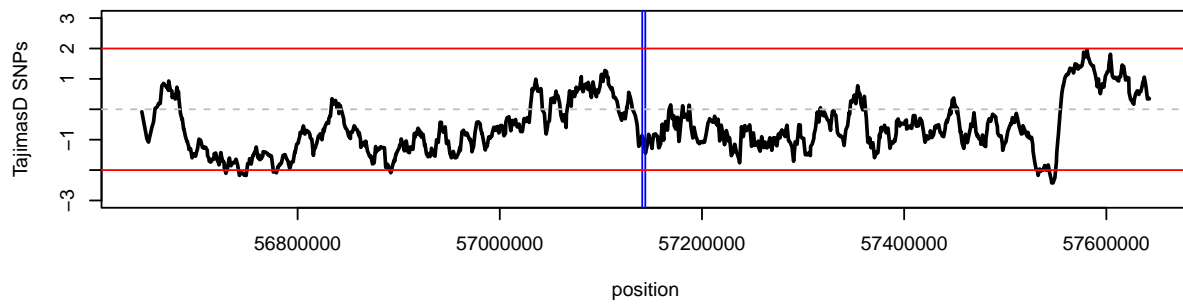

65 YRI PRR20A

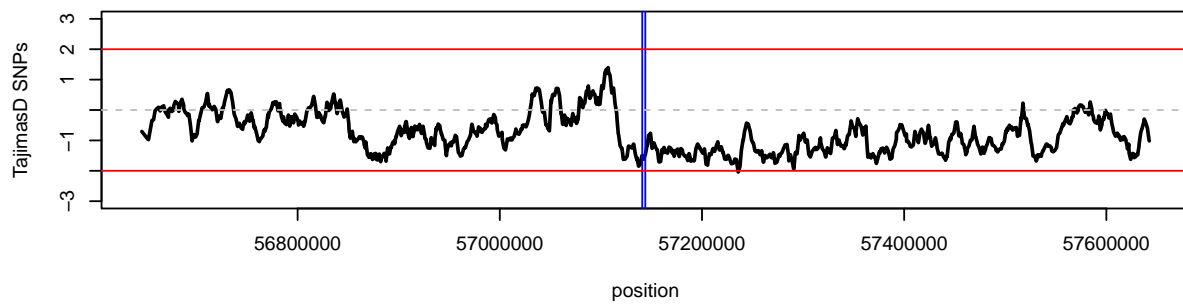

66 CEU PRR20A

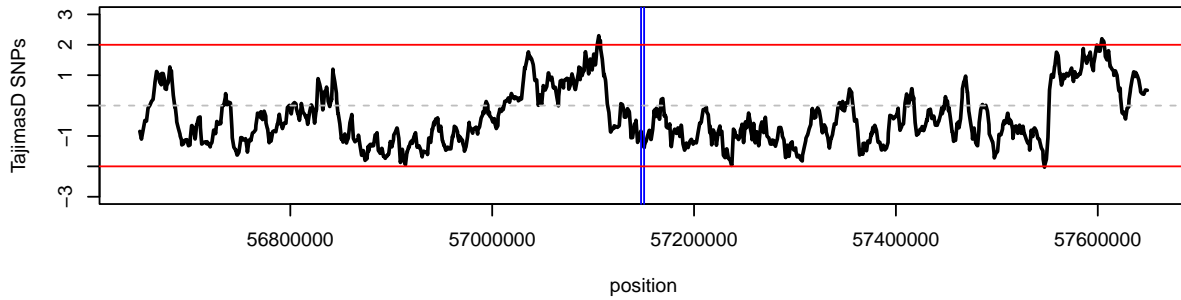

66 CHB PRR20A

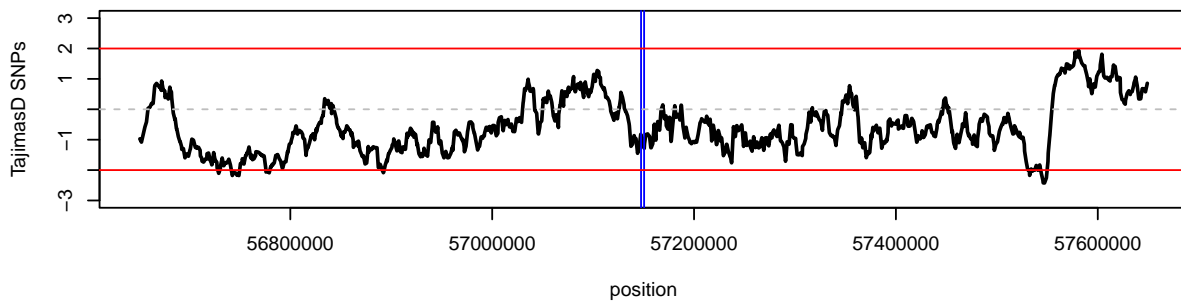

66 YRI PRR20A

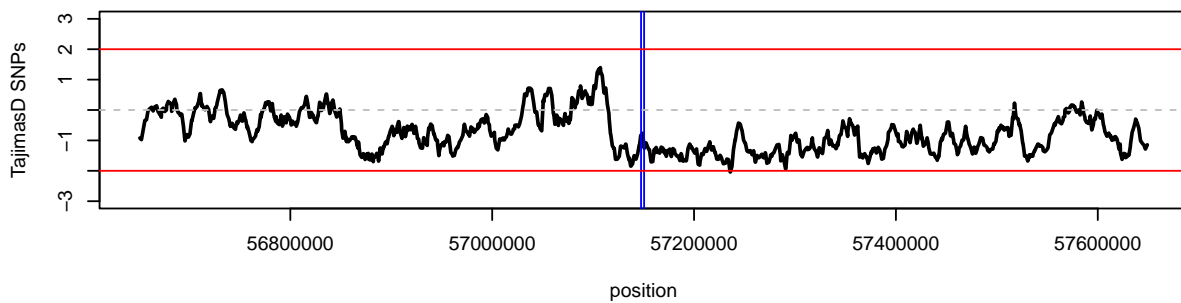

67 CEU PRR20A

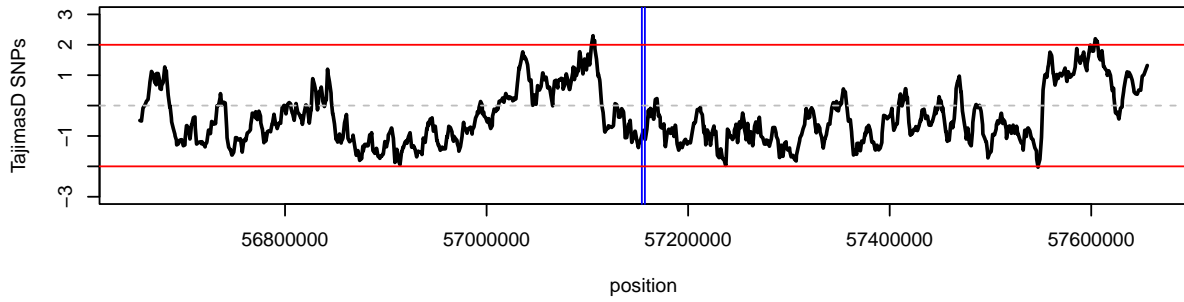

67 CHB PRR20A

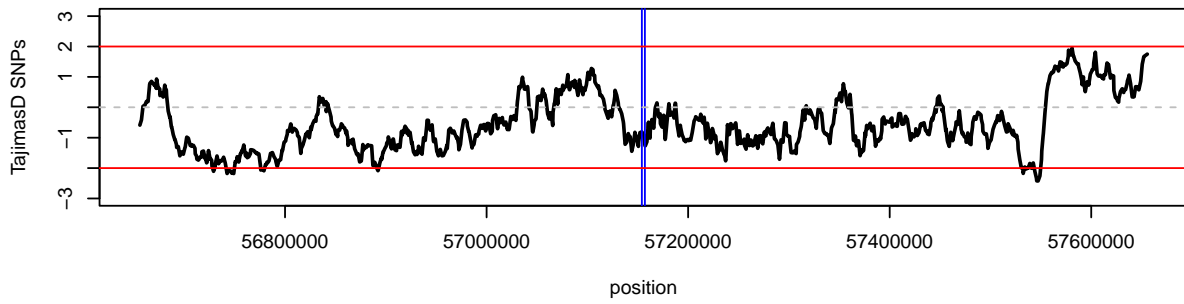

67 YRI PRR20A

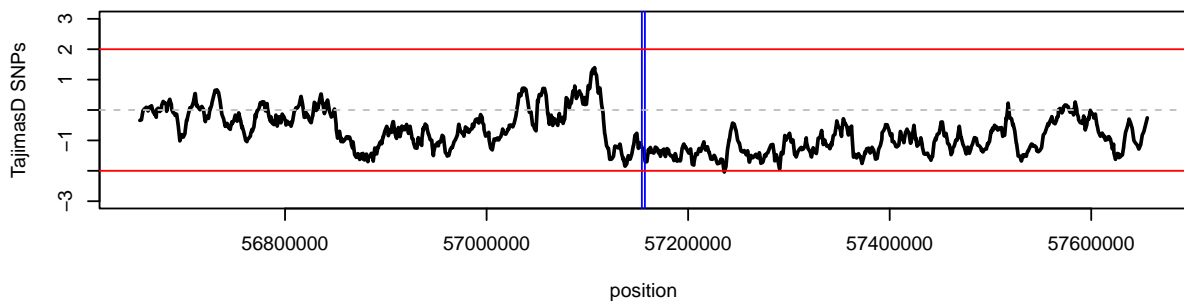



68 CEU PRR20A

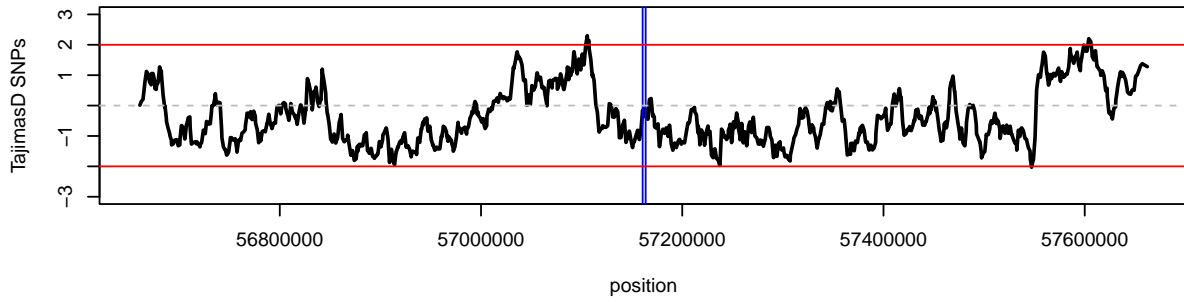

68 CHB PRR20A

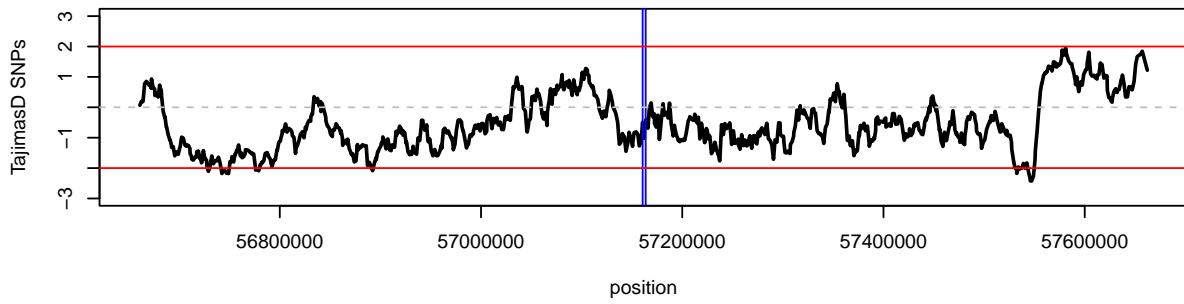

68 YRI PRR20A

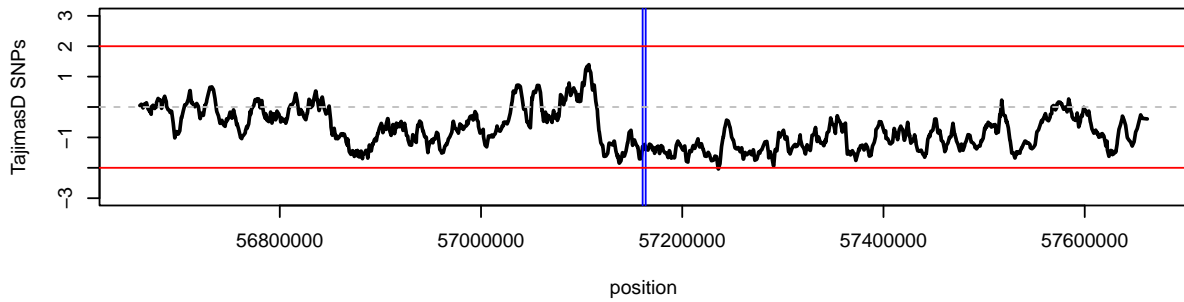

69 CEU PRR20A

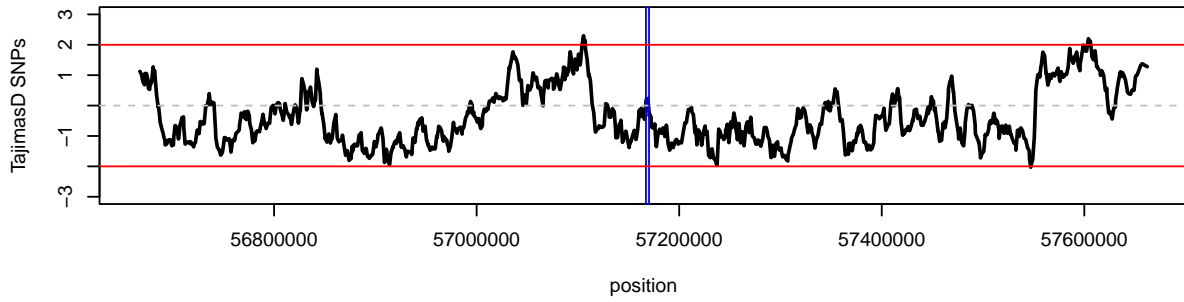

69 CHB PRR20A

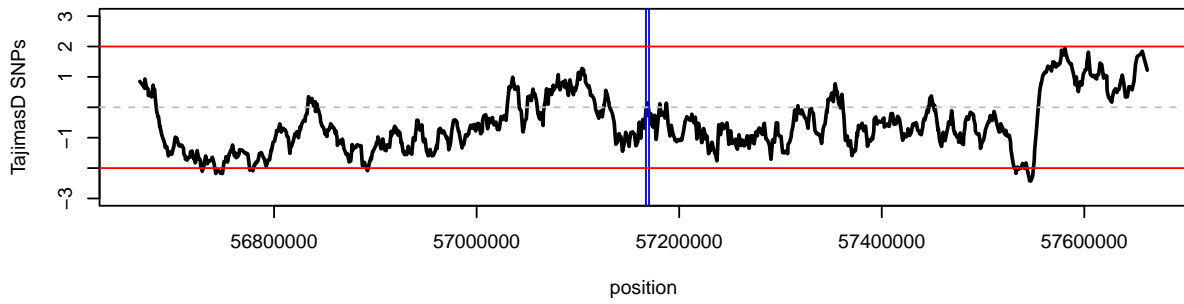

69 YRI PRR20A

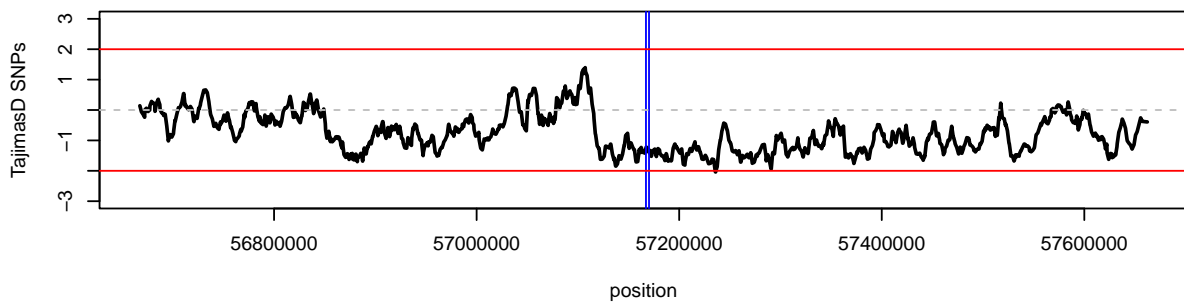

**70 CEU PSG3**

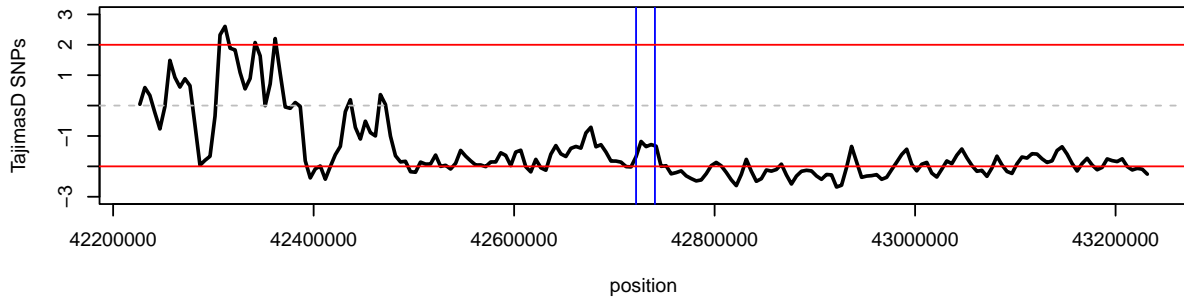

**70 CHB PSG3**

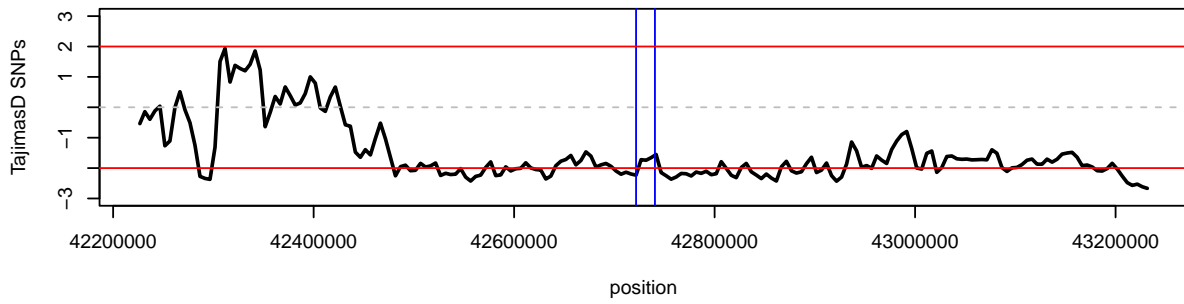

**70 YRI PSG3**

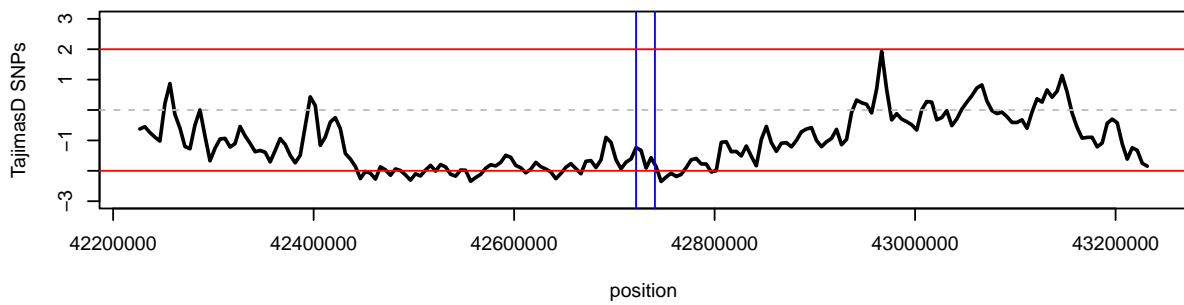

71 CEU RGPD1

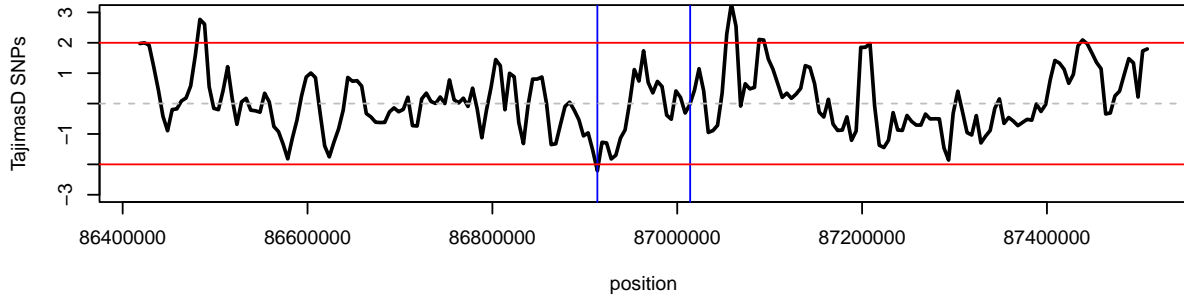

71 CHB RGPD1

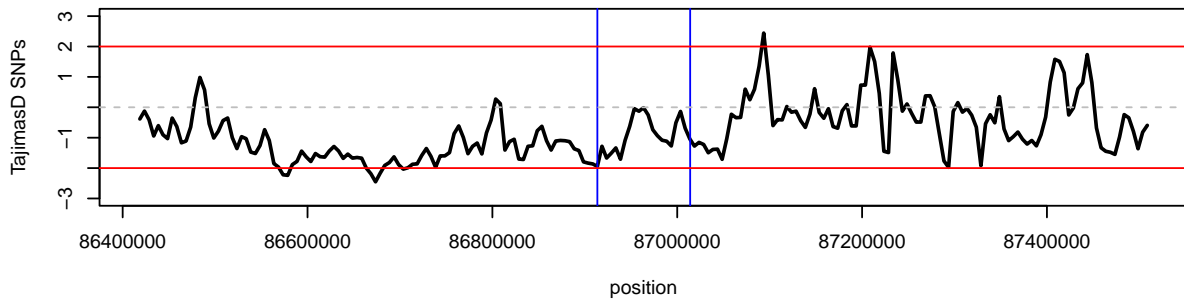

71 YRI RGPD1

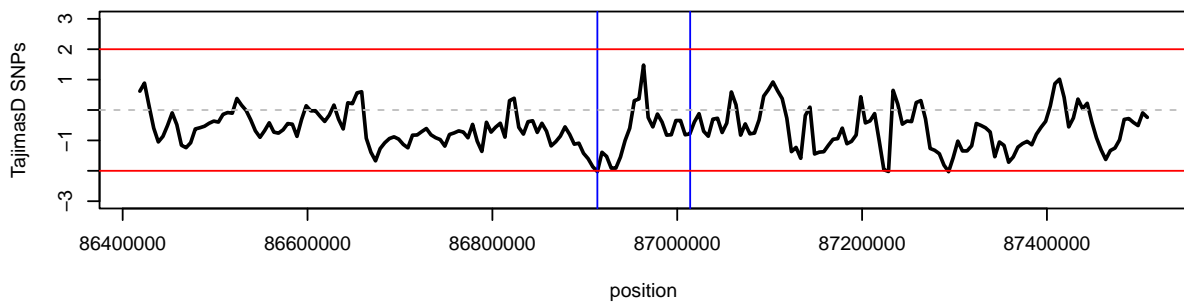

**72 CEU SPDYE3**

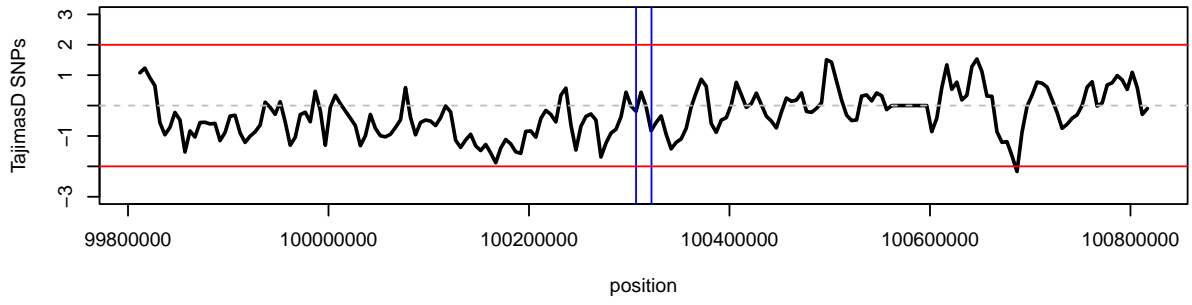

**72 CHB SPDYE3**

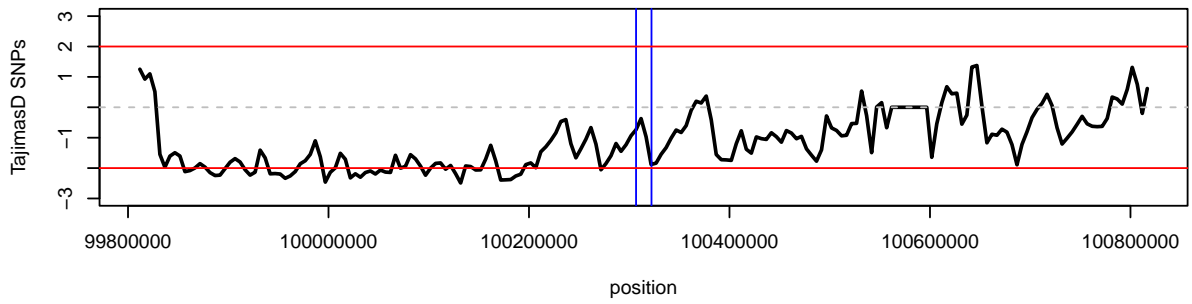

**72 YRI SPDYE3**

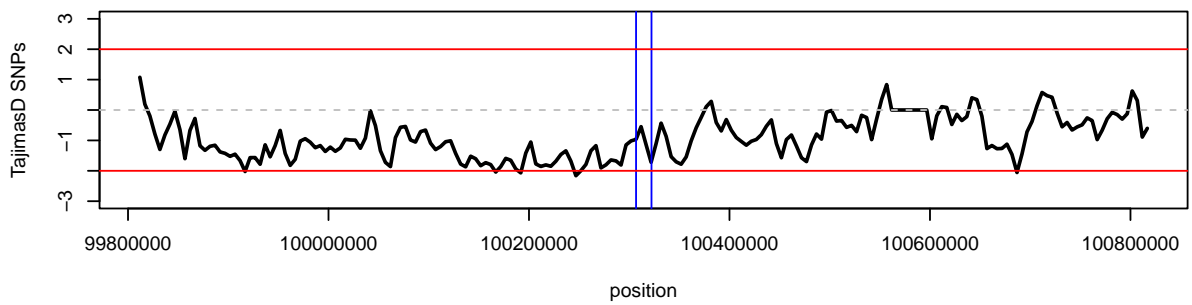

73 CEU SULT1A3

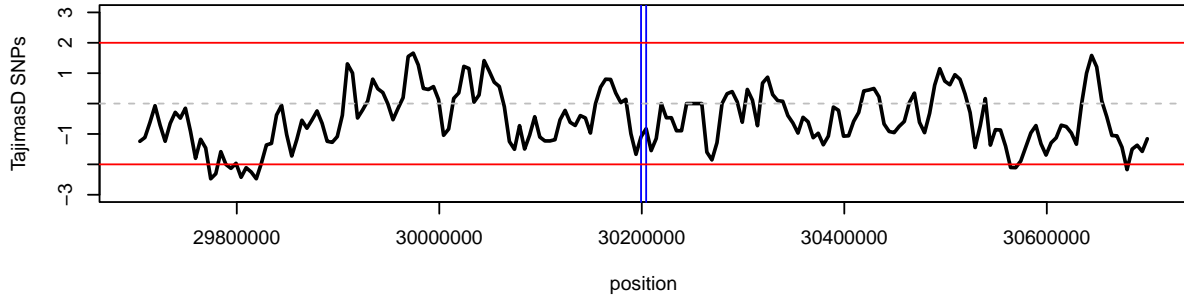

73 CHB SULT1A3

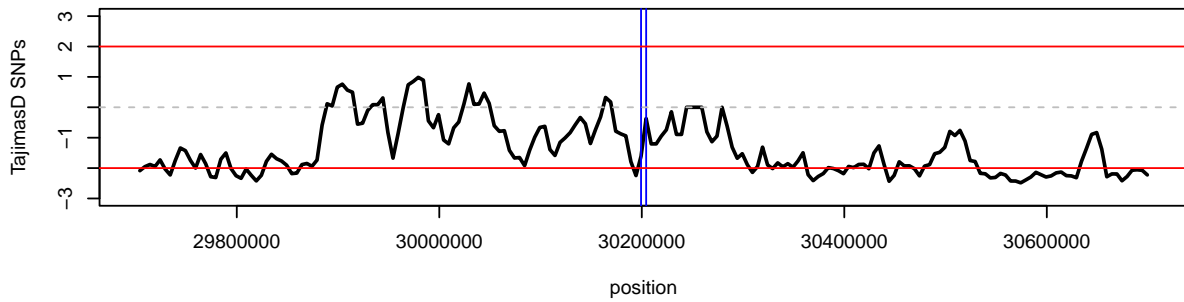

73 YRI SULT1A3

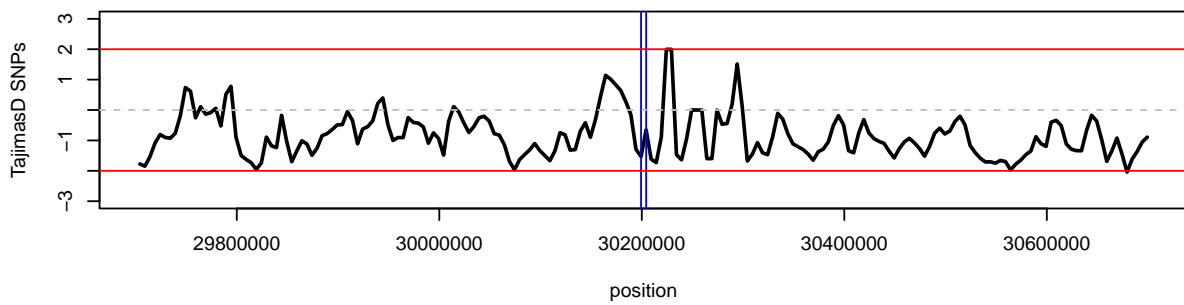

74 CEU TBC1D3

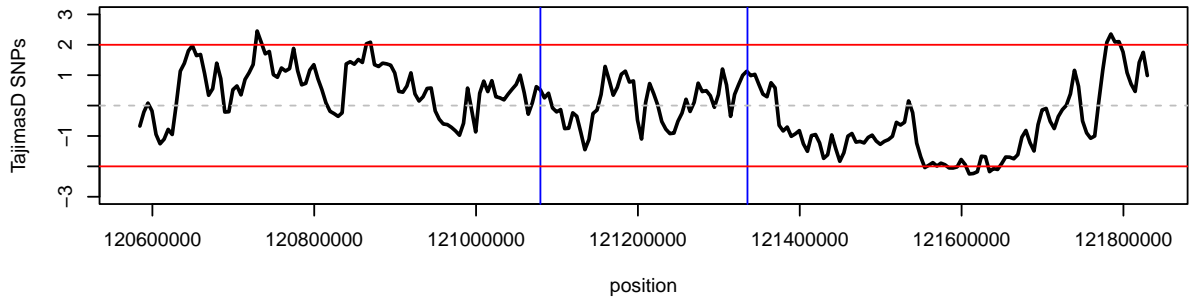

74 CHB TBC1D3

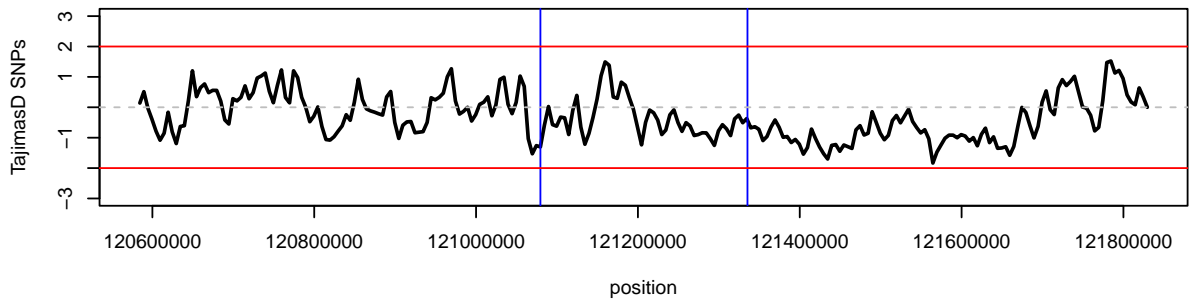

74 YRI TBC1D3

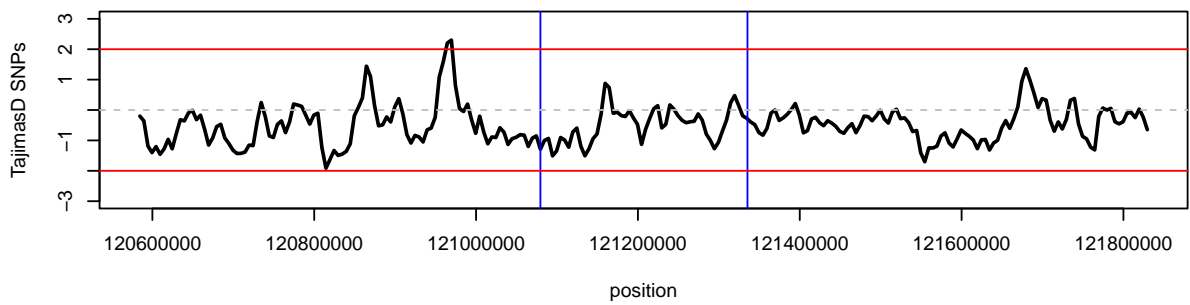

**75 CEU TBC1D3**

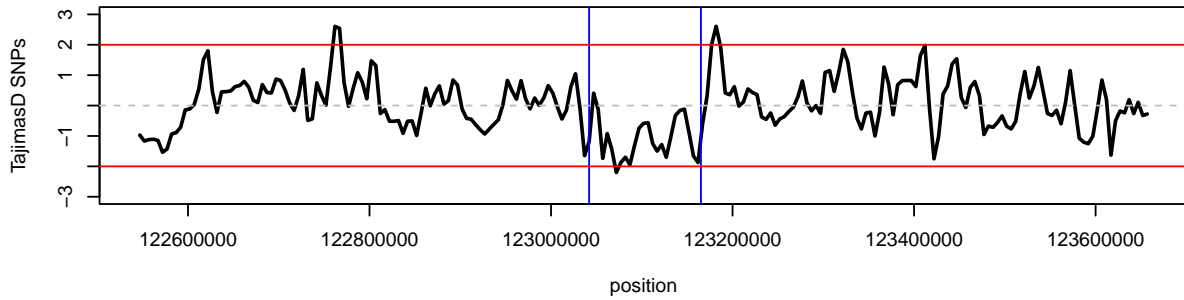

**75 CHB TBC1D3**

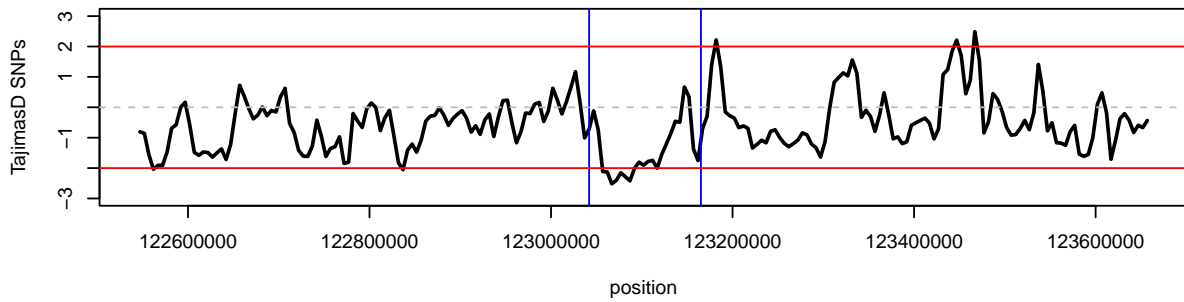

**75 YRI TBC1D3**

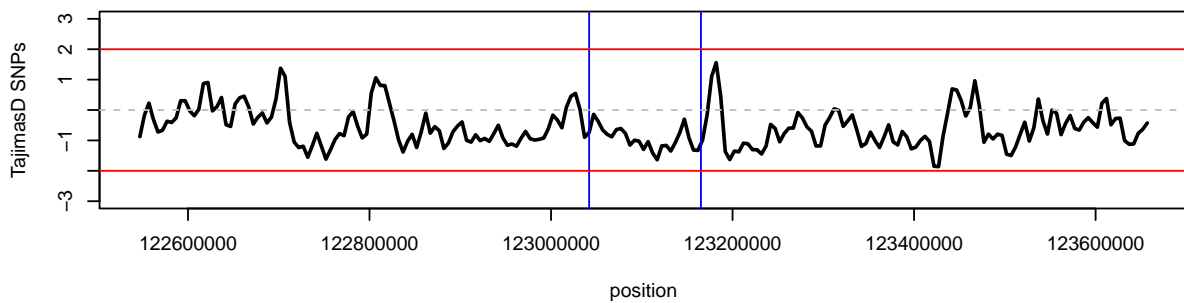



**76 CEU TBC1D3**

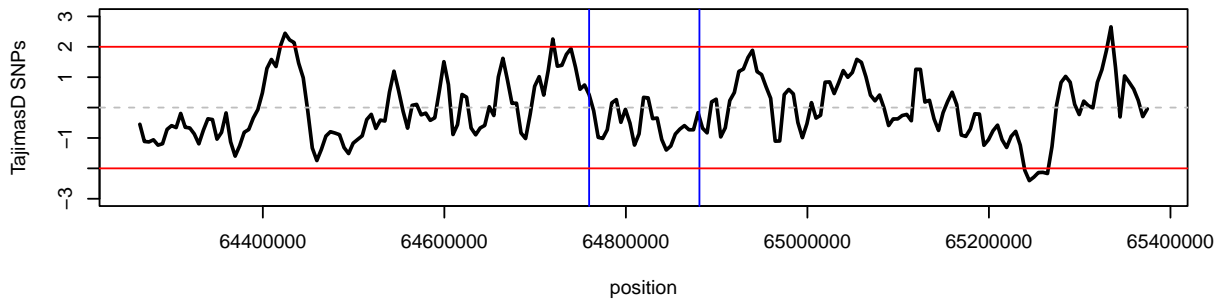

**76 CHB TBC1D3**

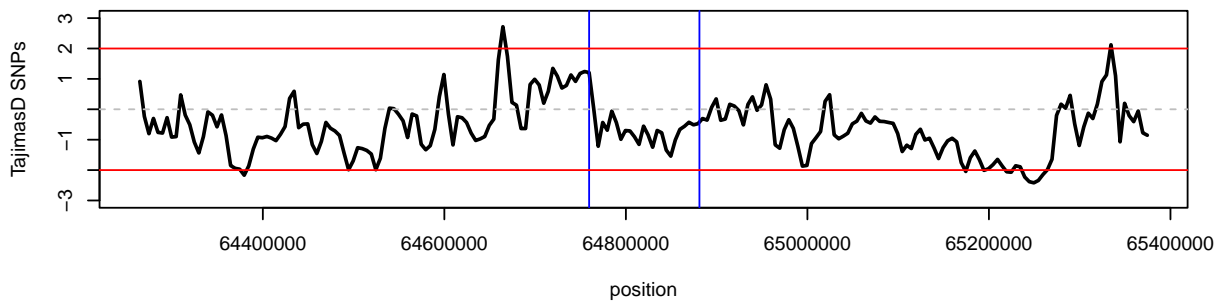

**76 YRI TBC1D3**

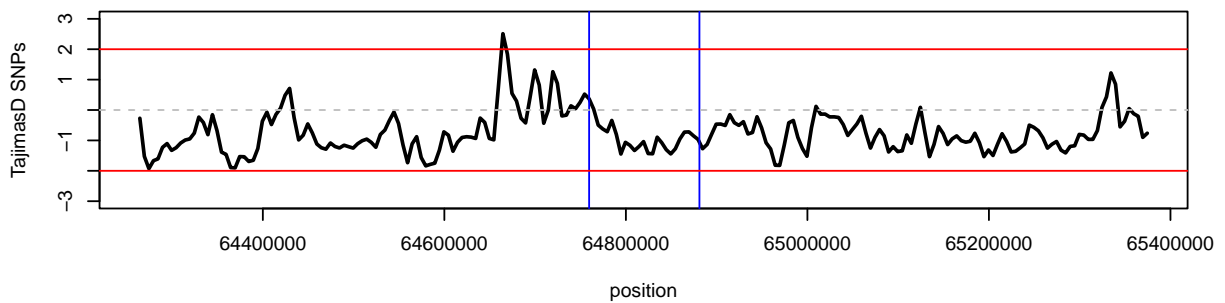

77 CEU TBC1D3

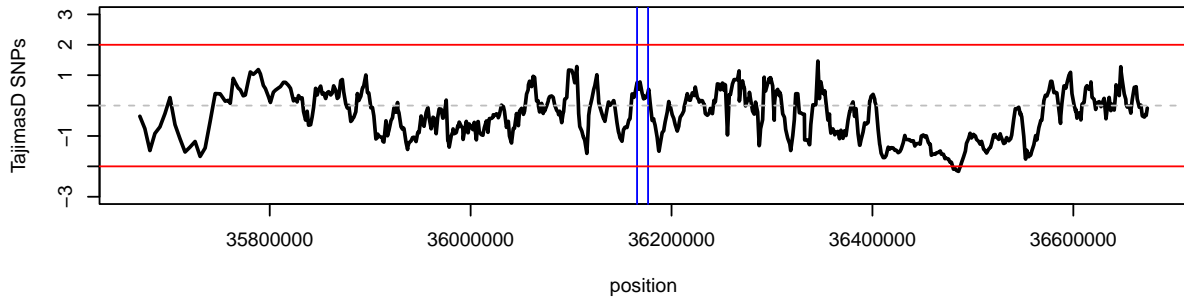

77 CHB TBC1D3

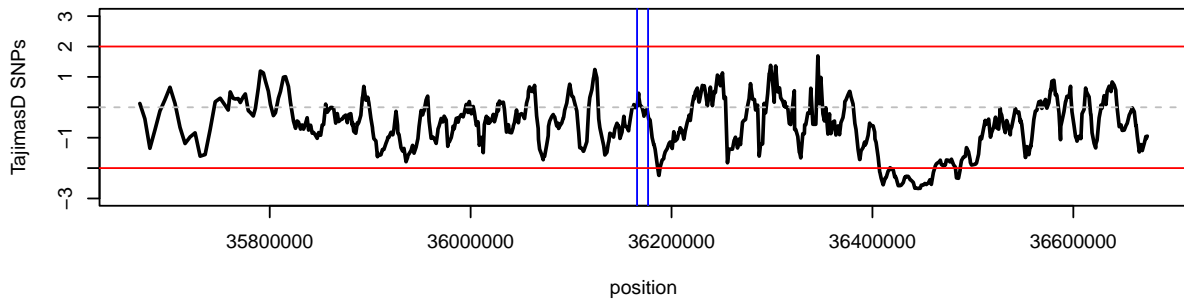

77 YRI TBC1D3

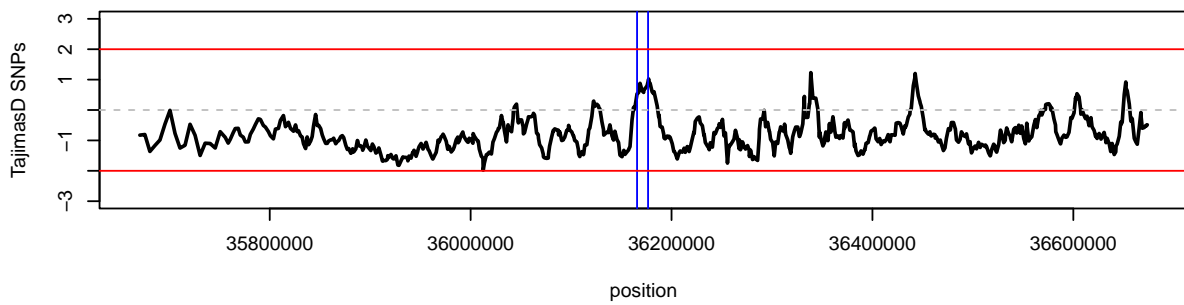

78 CEU TBC1D3

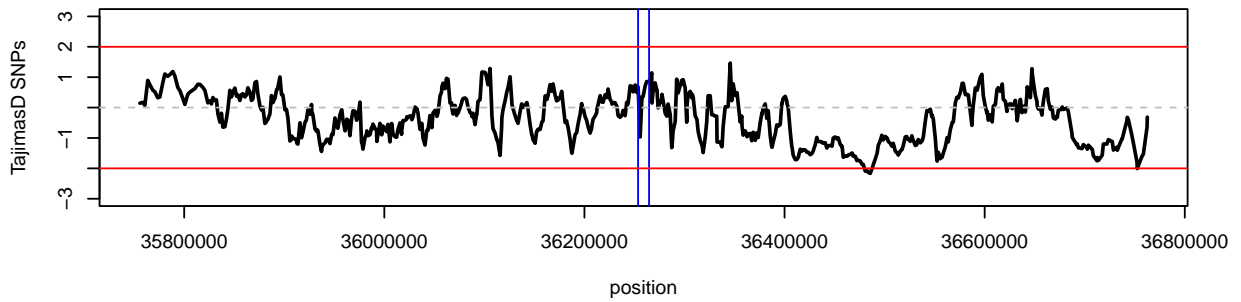

78 CHB TBC1D3

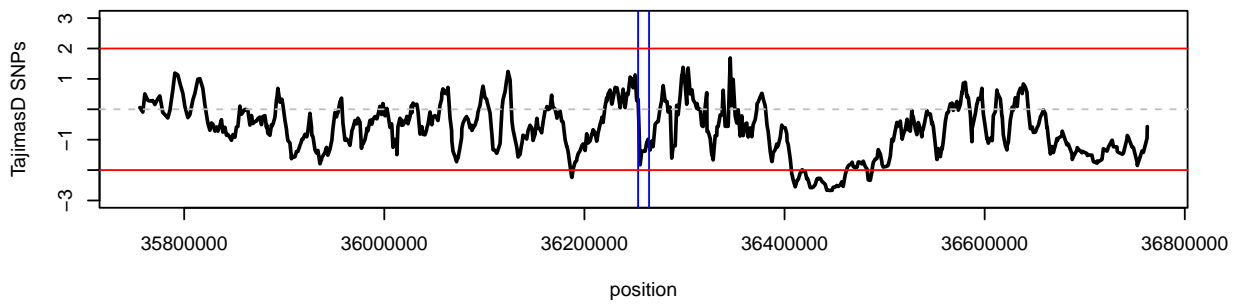

78 YRI TBC1D3

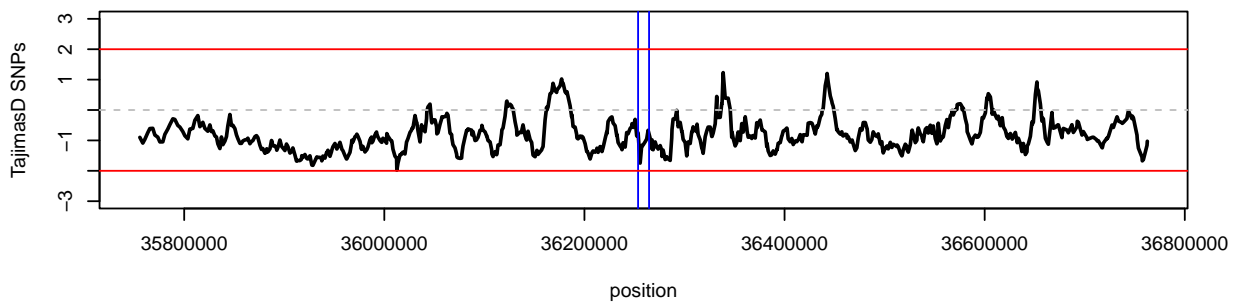

79 CEU TBC1D3

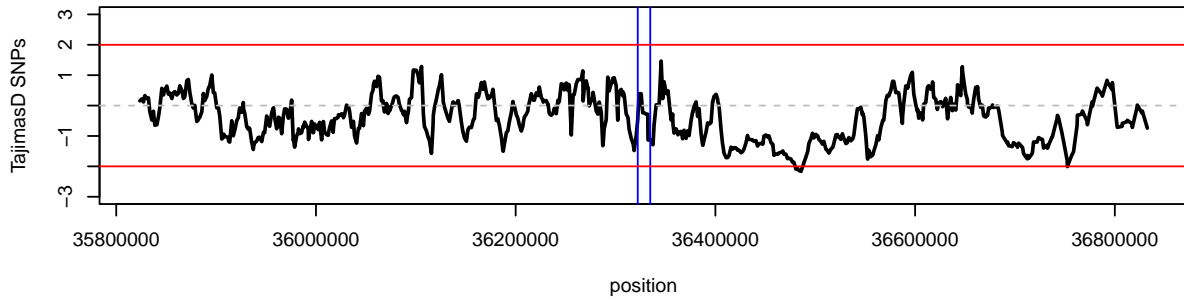

79 CHB TBC1D3

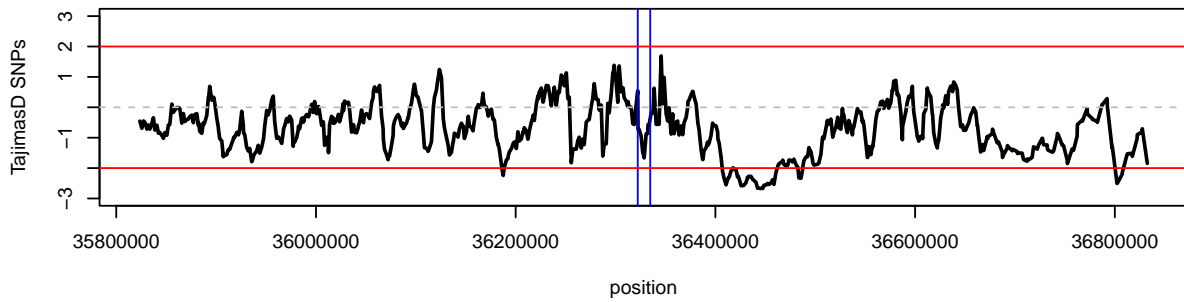

79 YRI TBC1D3

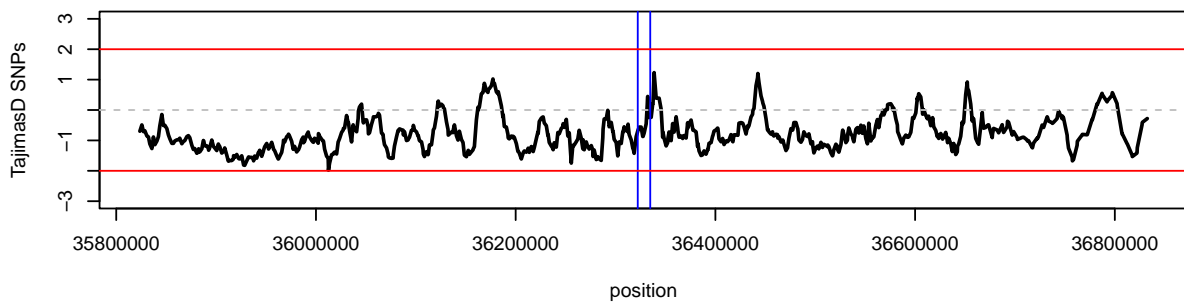

**80 CEU TBC1D3**

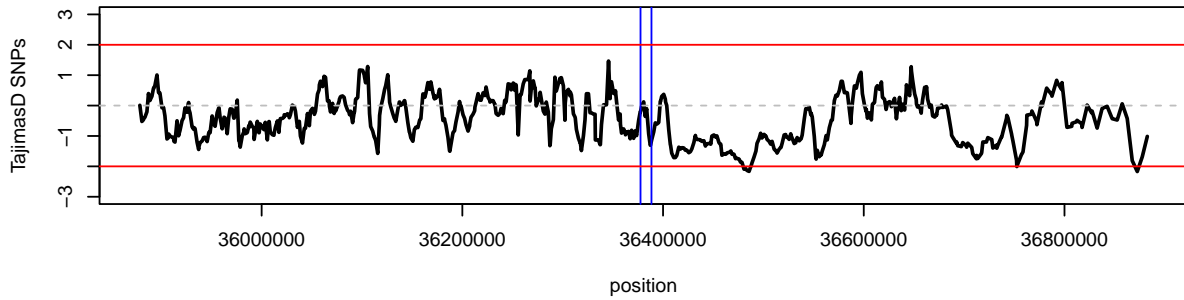

**80 CHB TBC1D3**

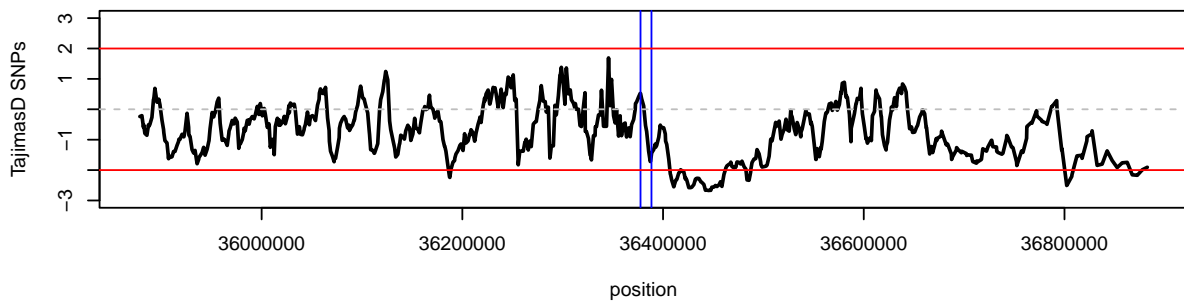

**80 YRI TBC1D3**

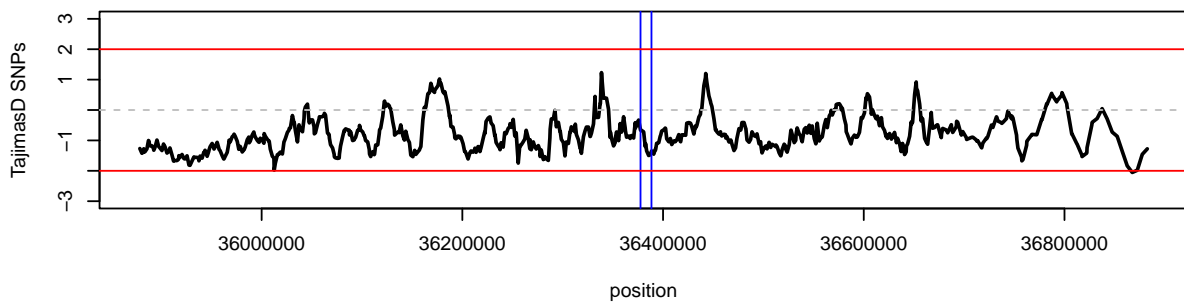

81 CEU TBC1D3

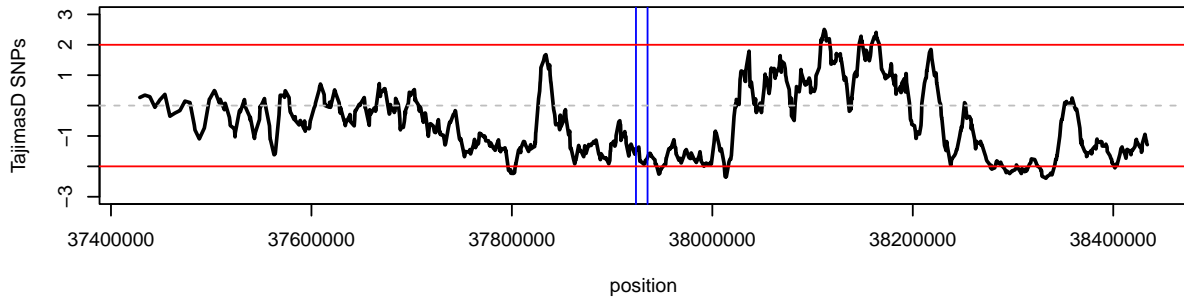

81 CHB TBC1D3

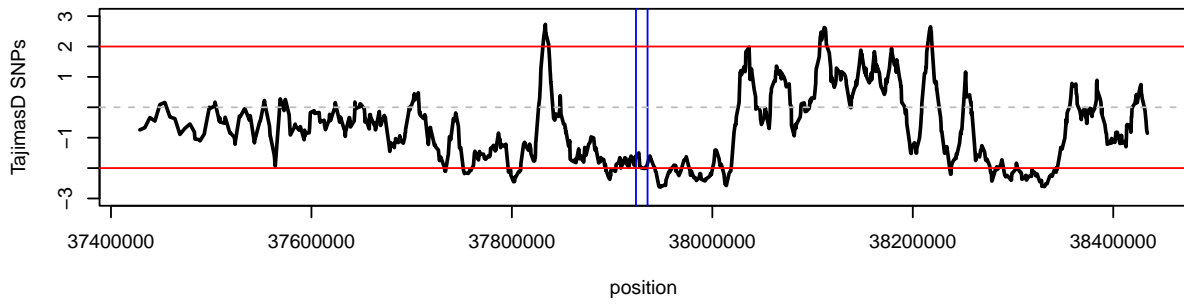

81 YRI TBC1D3

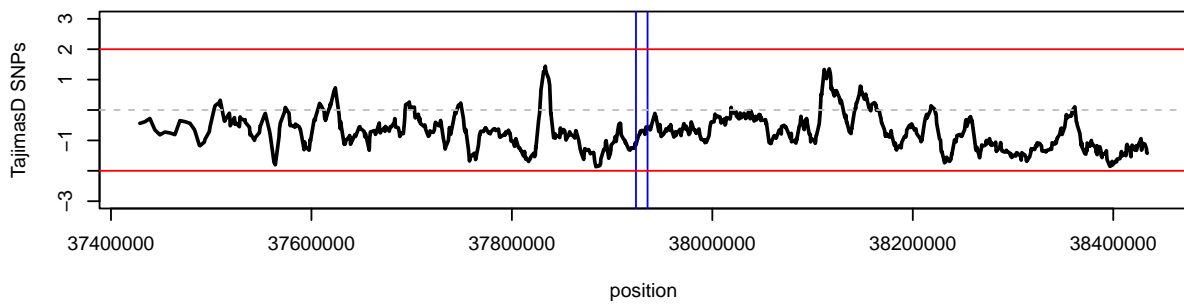

82 CEU TBC1D3

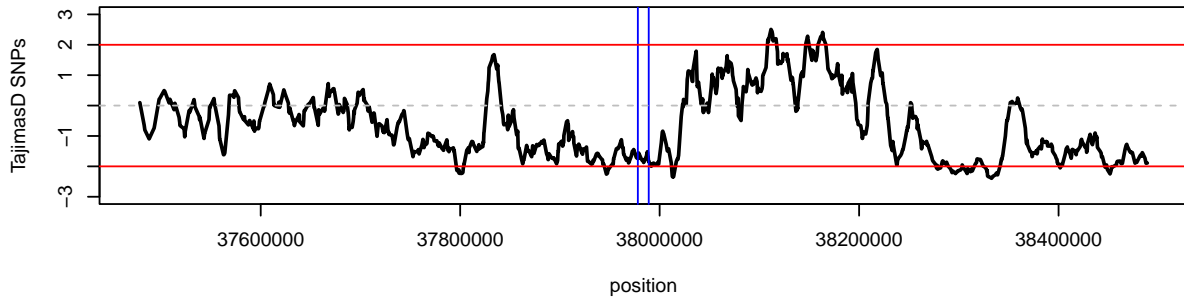

82 CHB TBC1D3

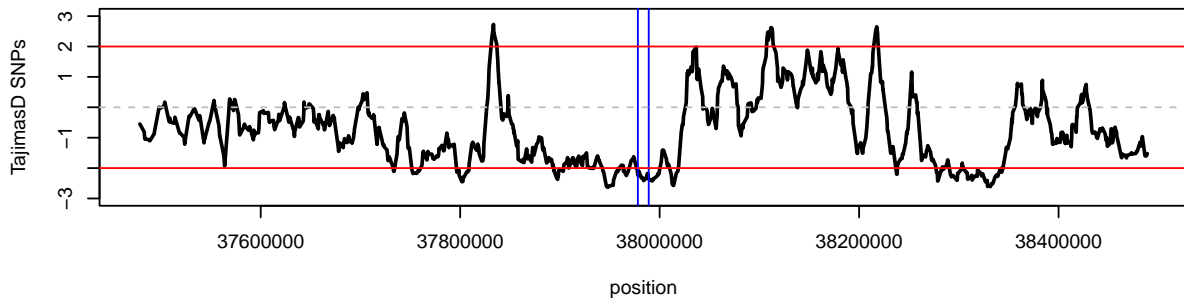

82 YRI TBC1D3

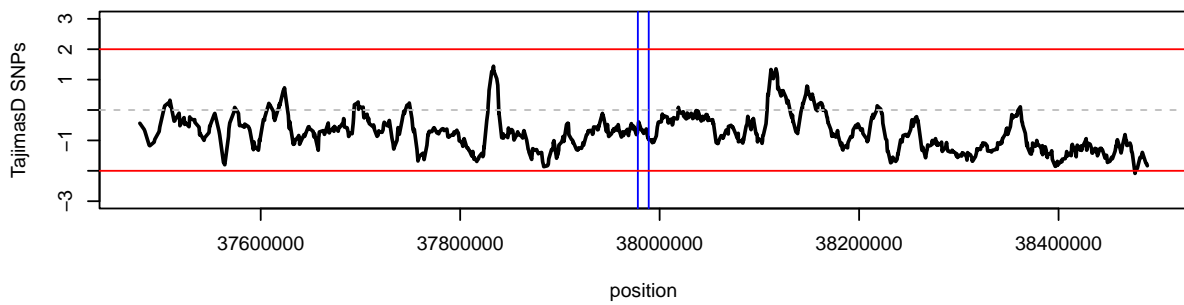

83 CEU TBC1D3

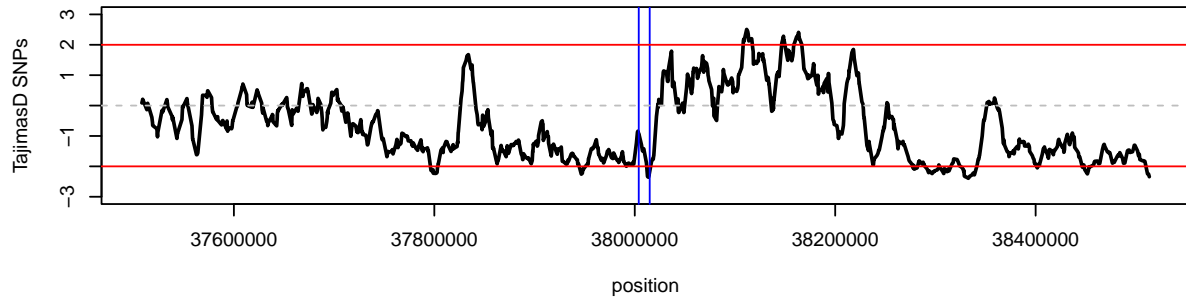

83 CHB TBC1D3

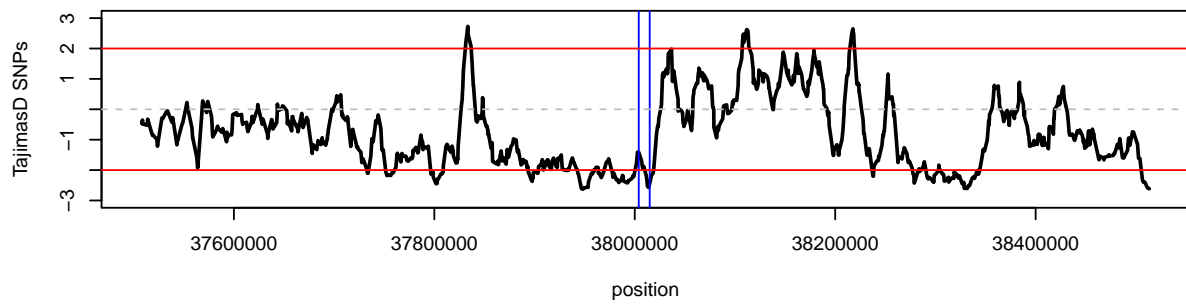

83 YRI TBC1D3

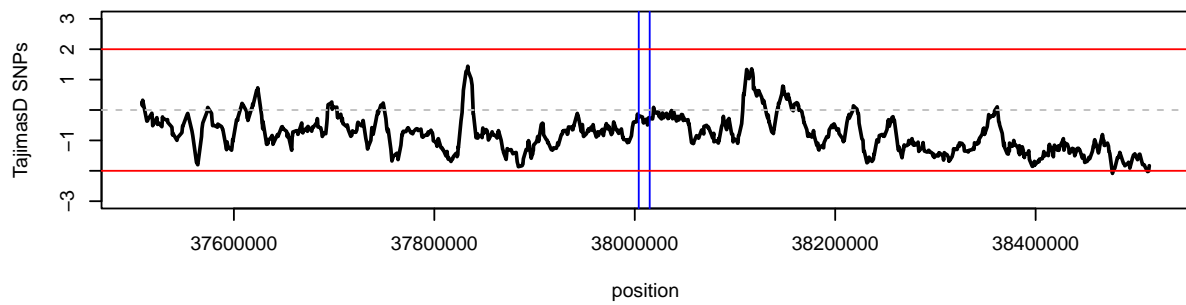



84 CEU TBC1D3

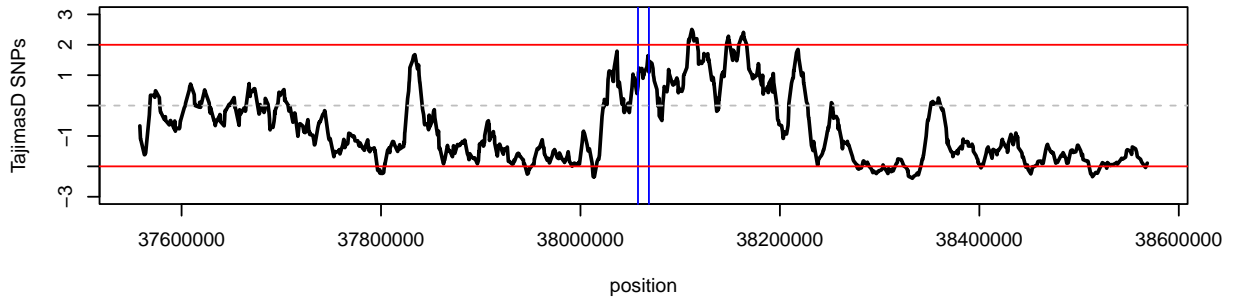

84 CHB TBC1D3

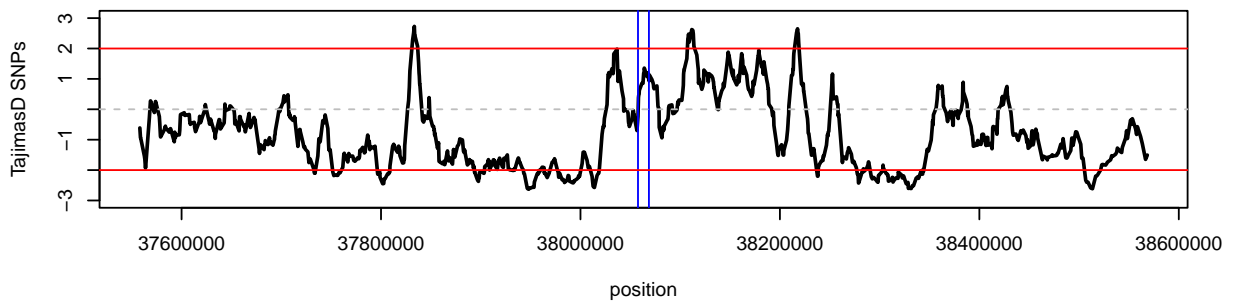

84 YRI TBC1D3

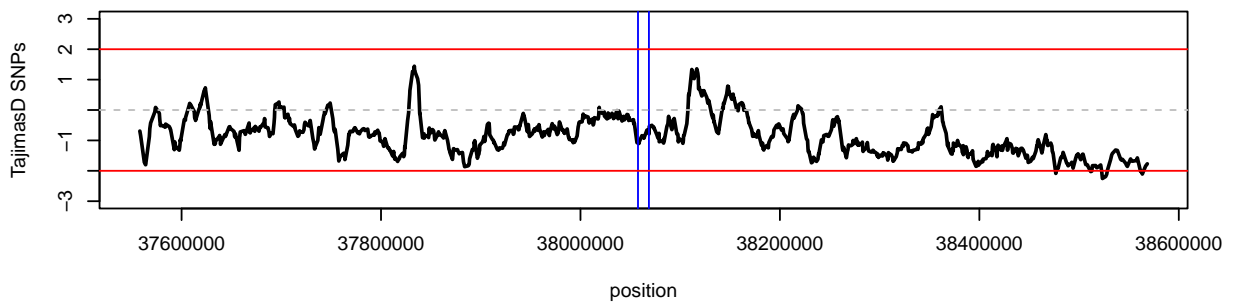

85 CEU TBC1D3

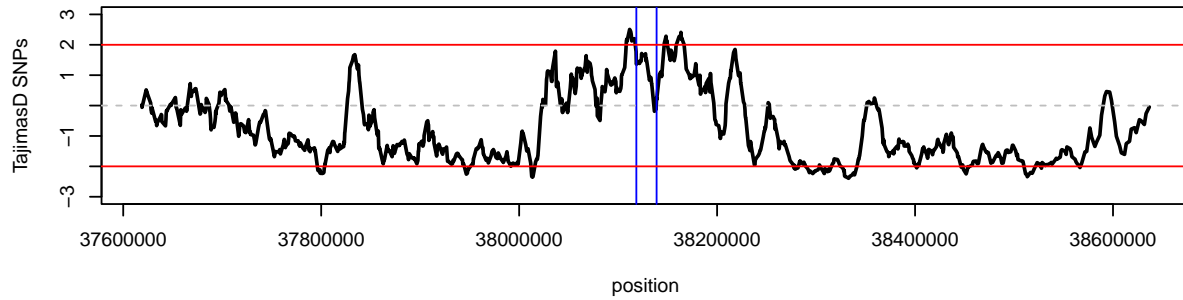

85 CHB TBC1D3

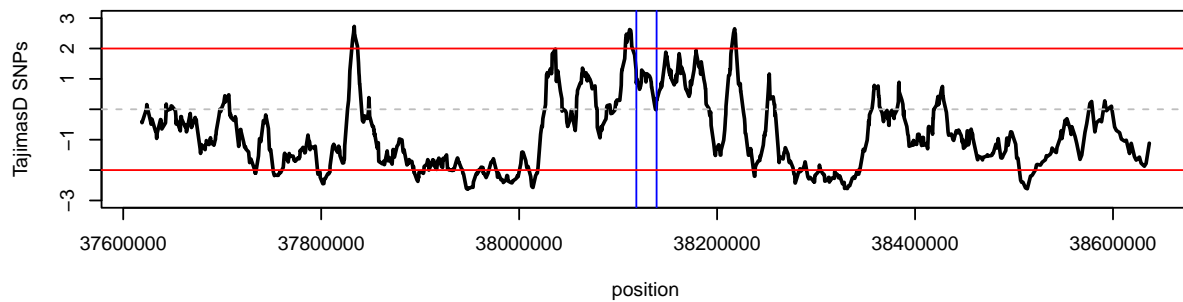

85 YRI TBC1D3

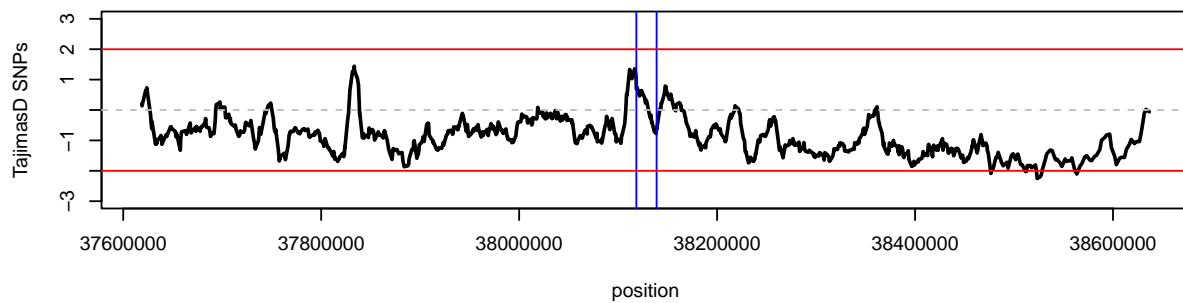

86 CEU TBC1D3

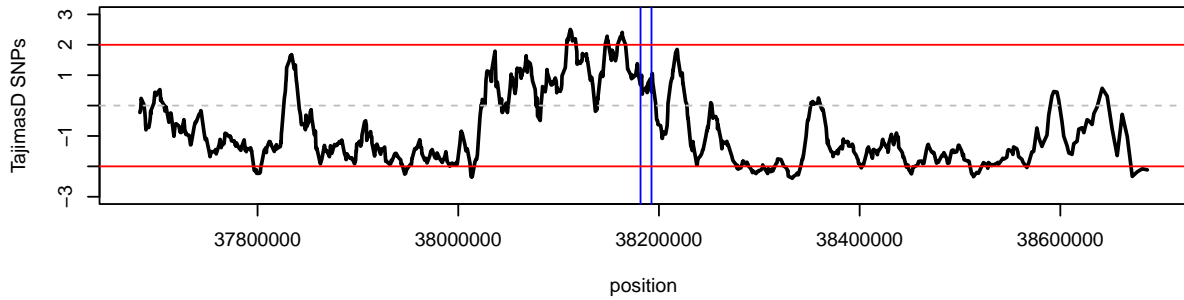

86 CHB TBC1D3

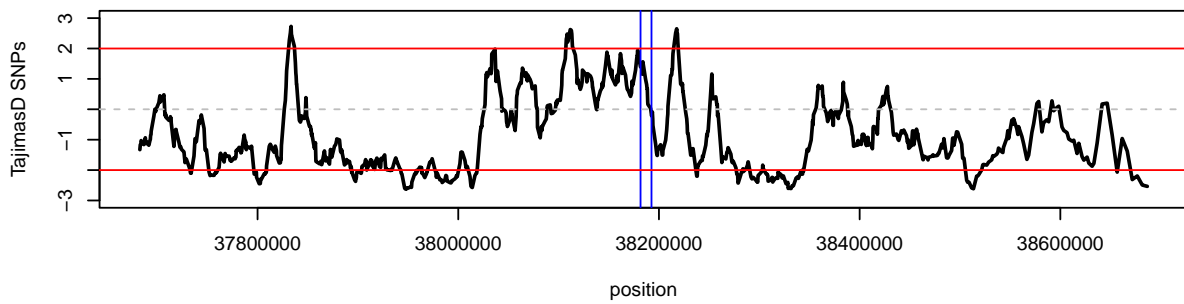

86 YRI TBC1D3

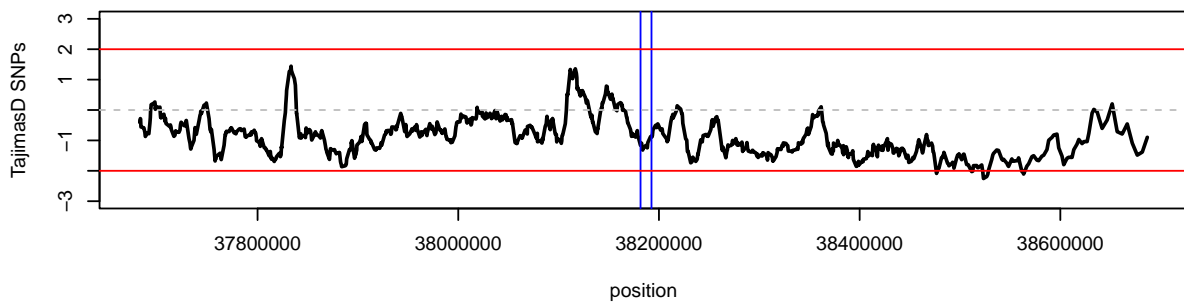

**87 CEU TP53TG3**

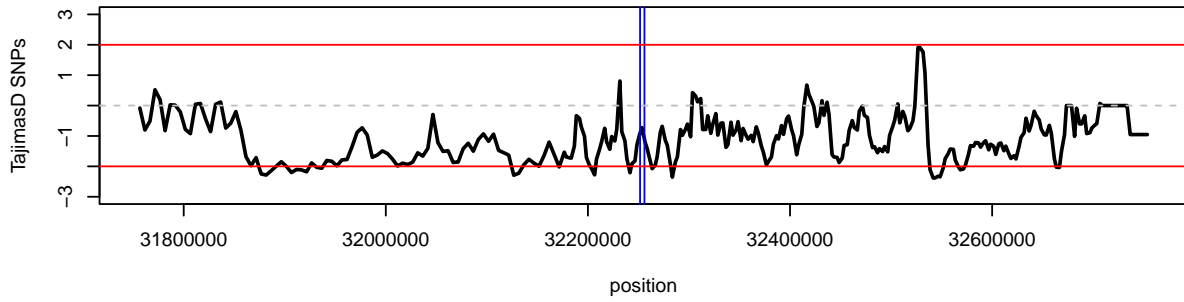

**87 CHB TP53TG3**

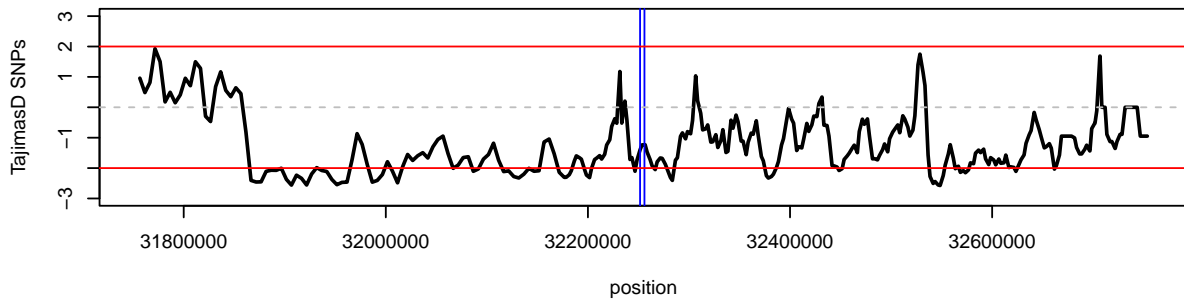

**87 YRI TP53TG3**

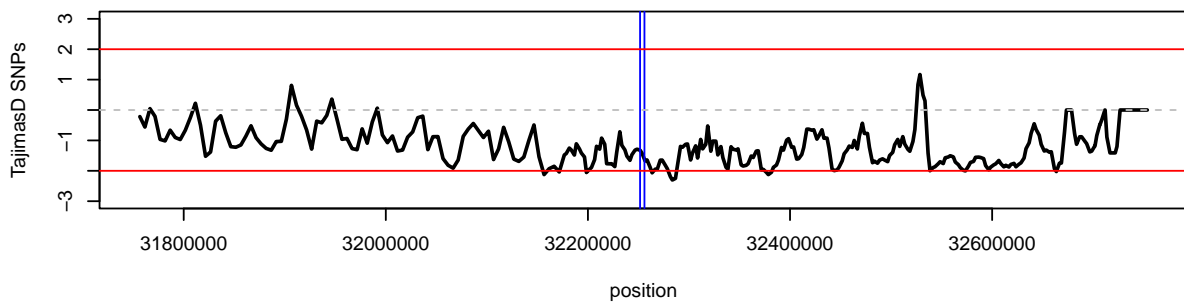

**88 CEU TP53TG3**

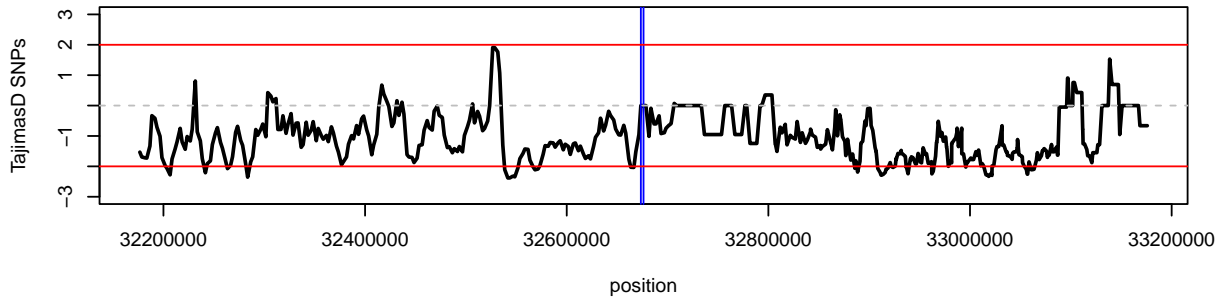

**88 CHB TP53TG3**

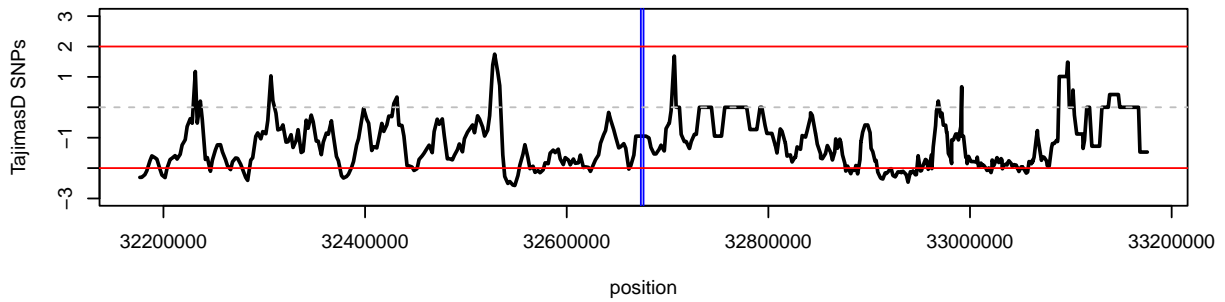

**88 YRI TP53TG3**

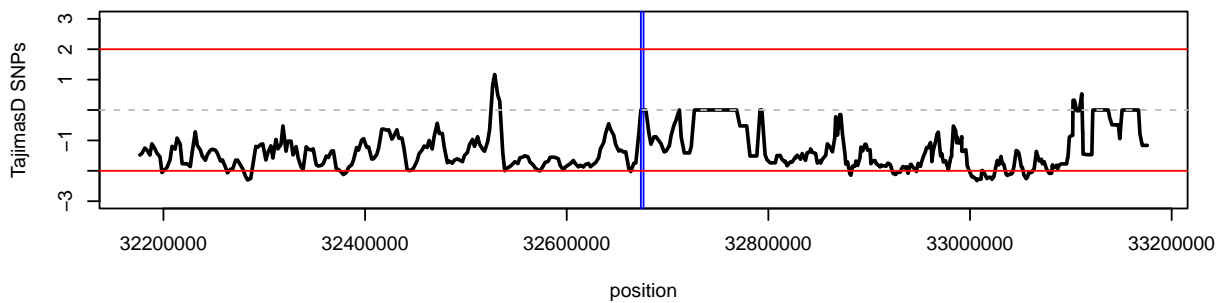

**89 CEU TP53TG3**

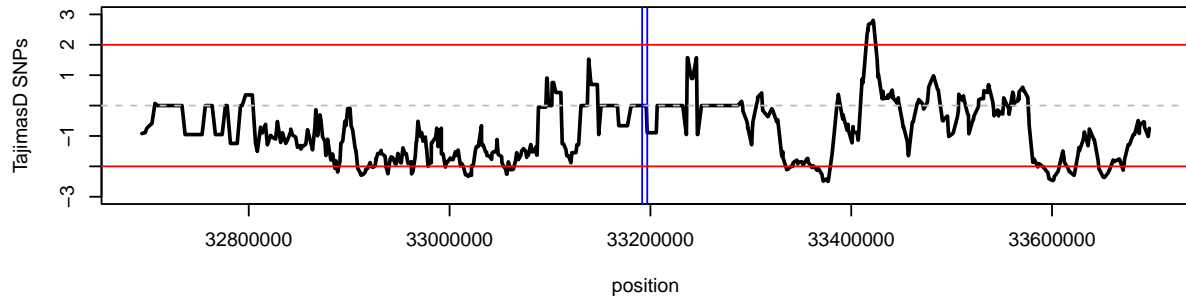

**89 CHB TP53TG3**

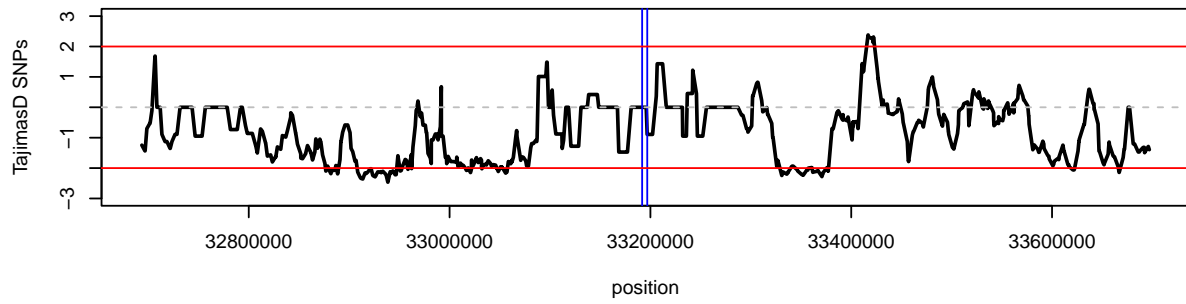

**89 YRI TP53TG3**

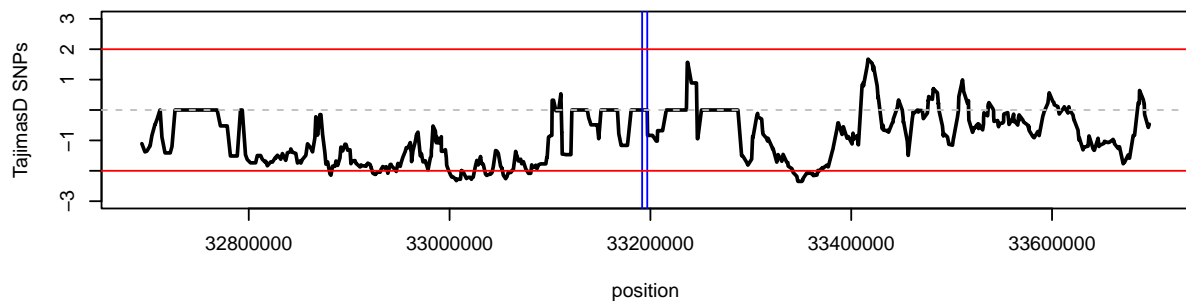

**90 CEU TP53TG3**

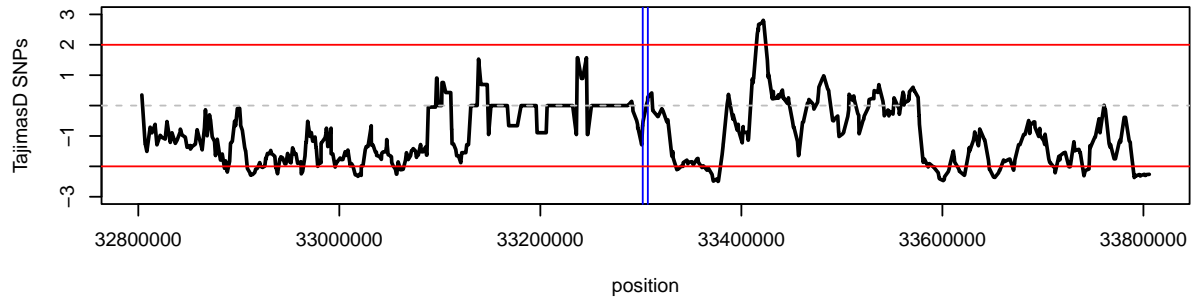

**90 CHB TP53TG3**

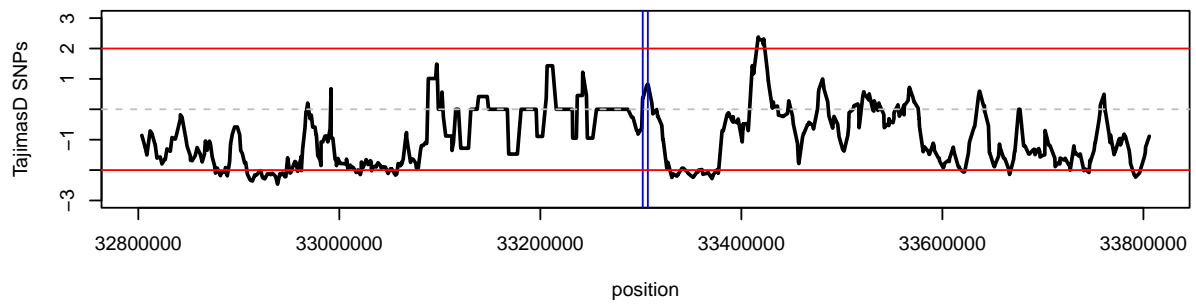

**90 YRI TP53TG3**

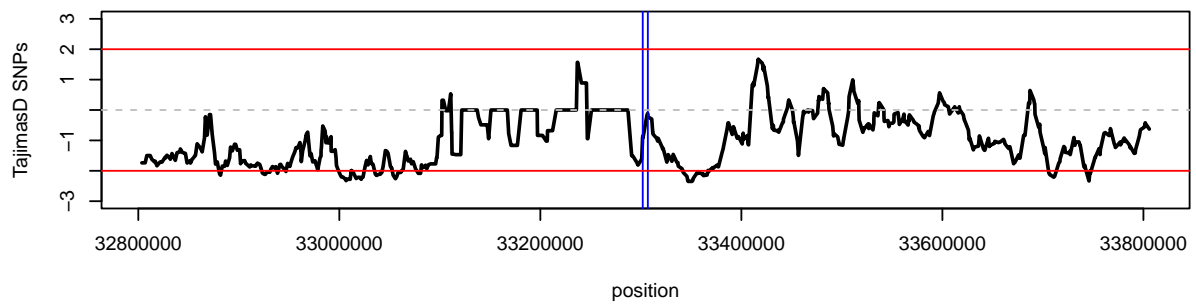

91 CEU TP53TG3

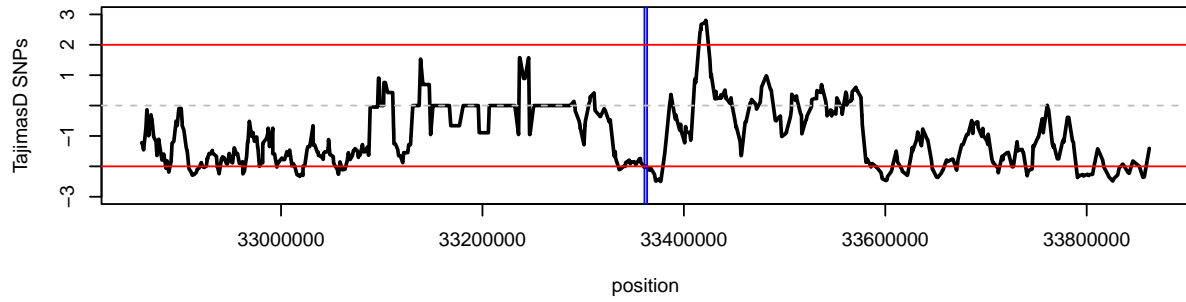

91 CHB TP53TG3

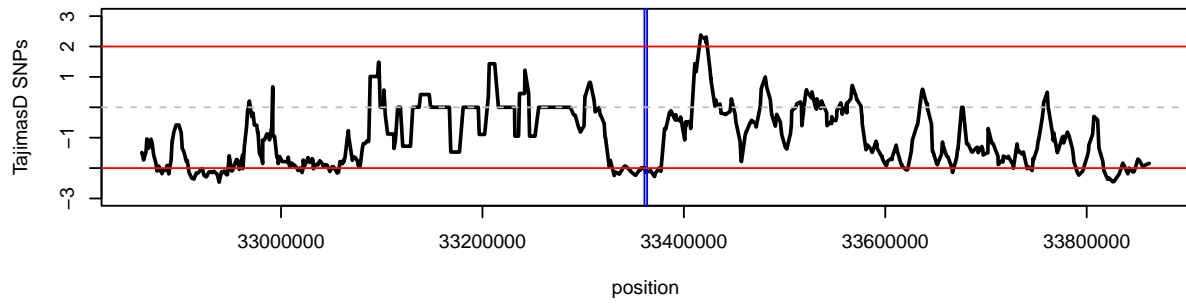

91 YRI TP53TG3

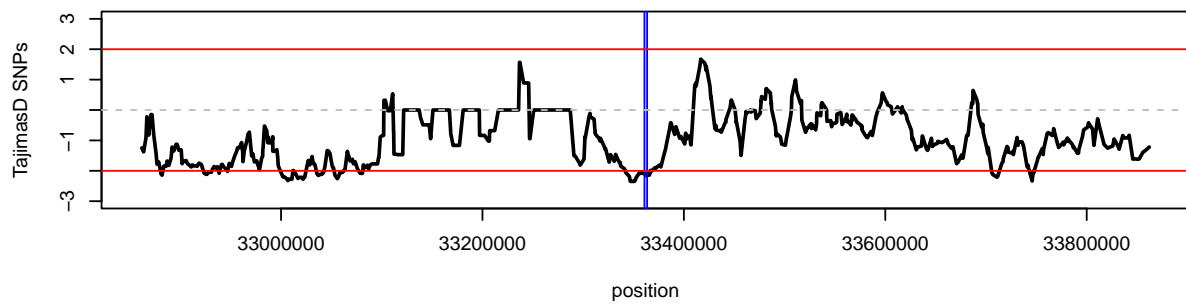



**92 CEU TP53TG3**

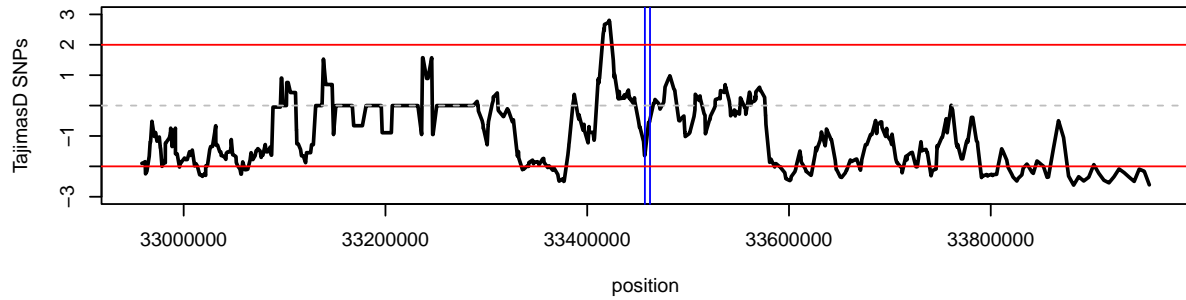

**92 CHB TP53TG3**

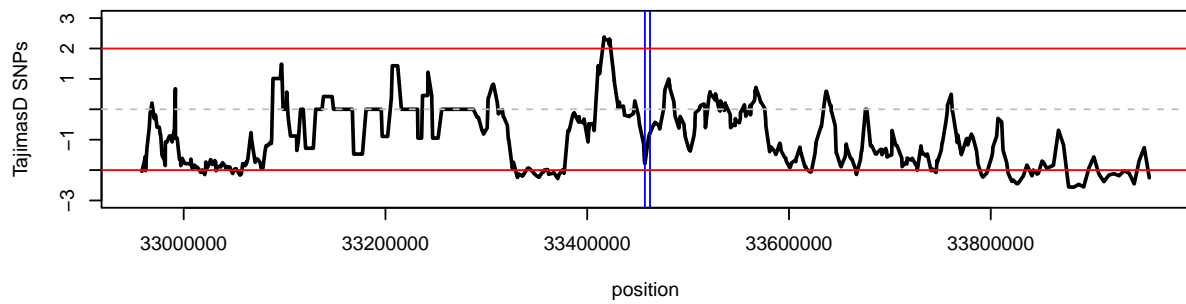

**92 YRI TP53TG3**

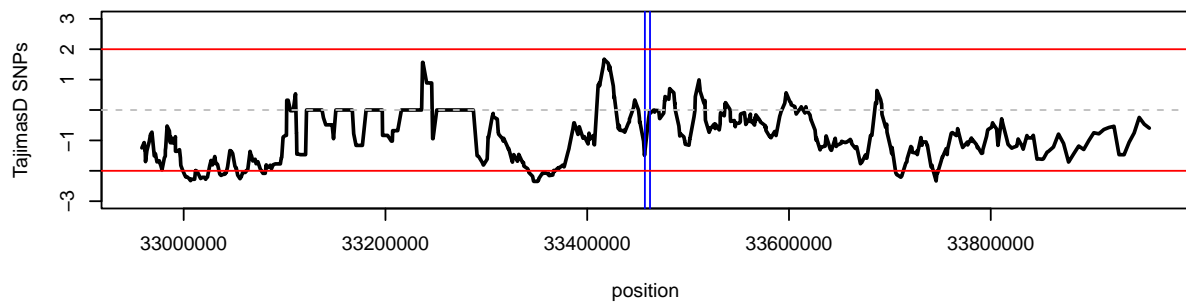

**93 CEU TRIM49L1**

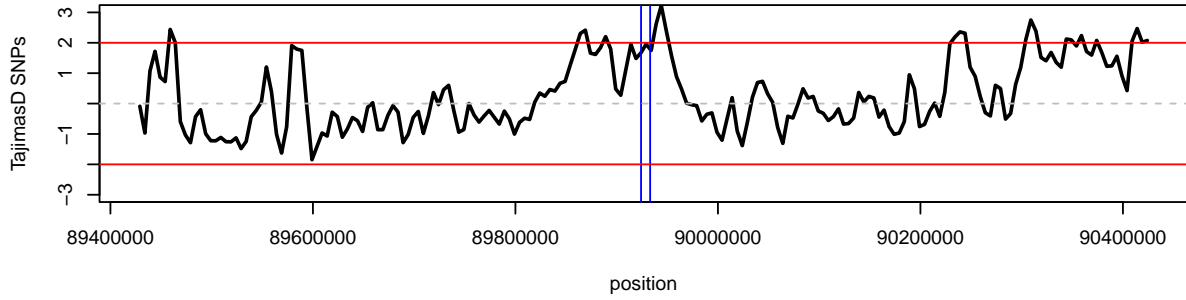

**93 CHB TRIM49L1**

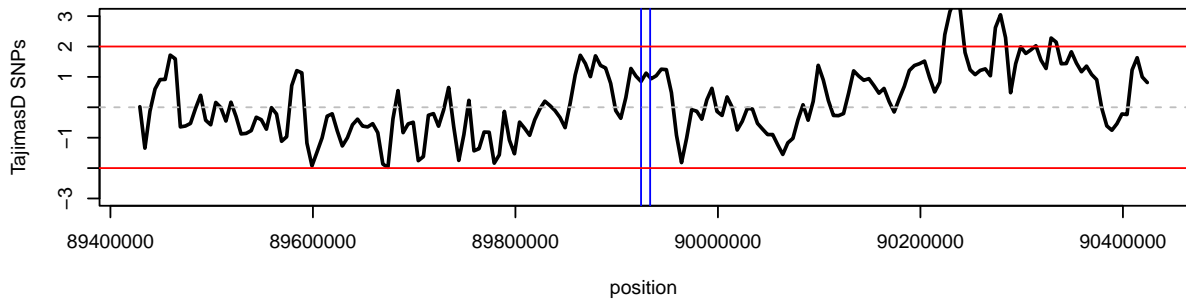

**93 YRI TRIM49L1**

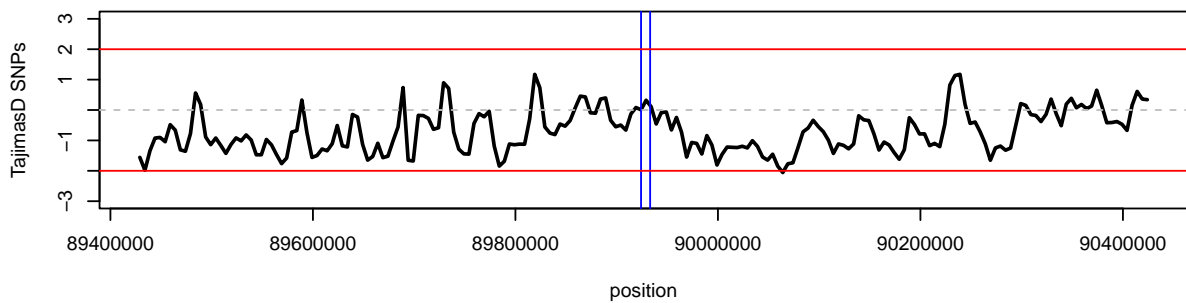

**CEU chr1 AMY1A**

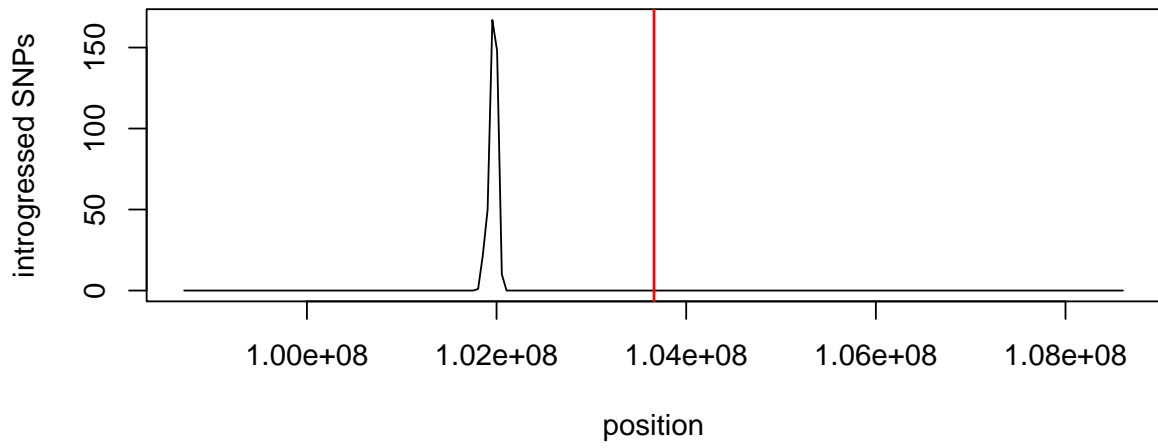

**CHB chr1 AMY1A**

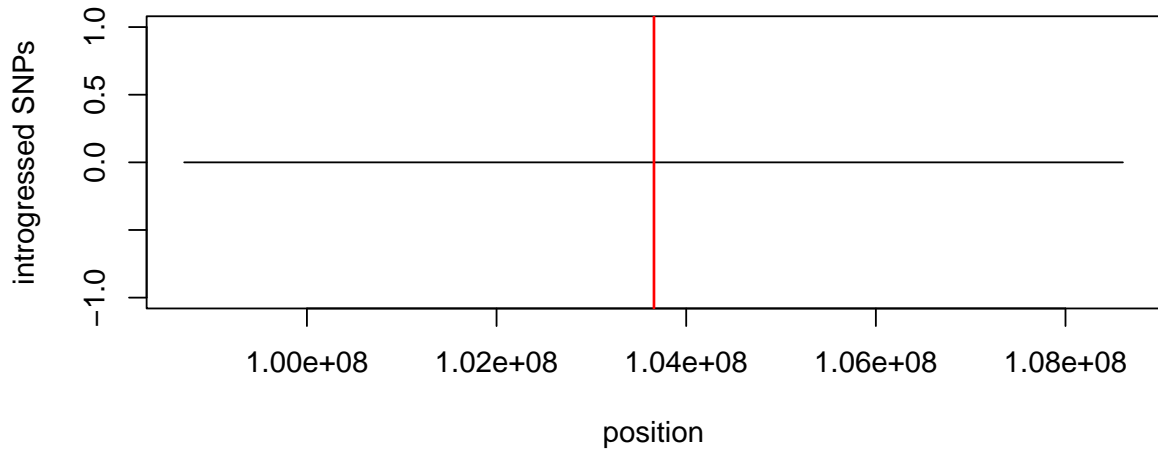

### CEU chr16 BOLA2B

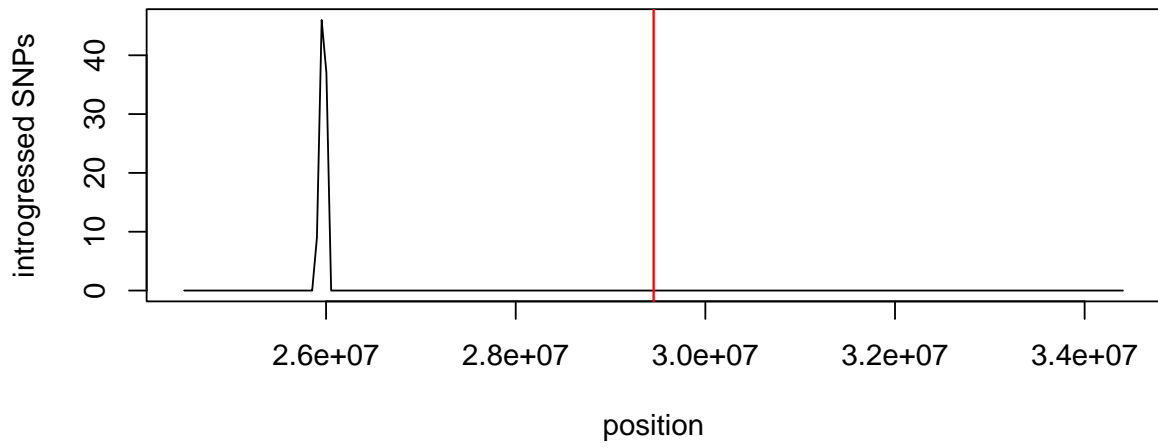

### CHB chr16 BOLA2B

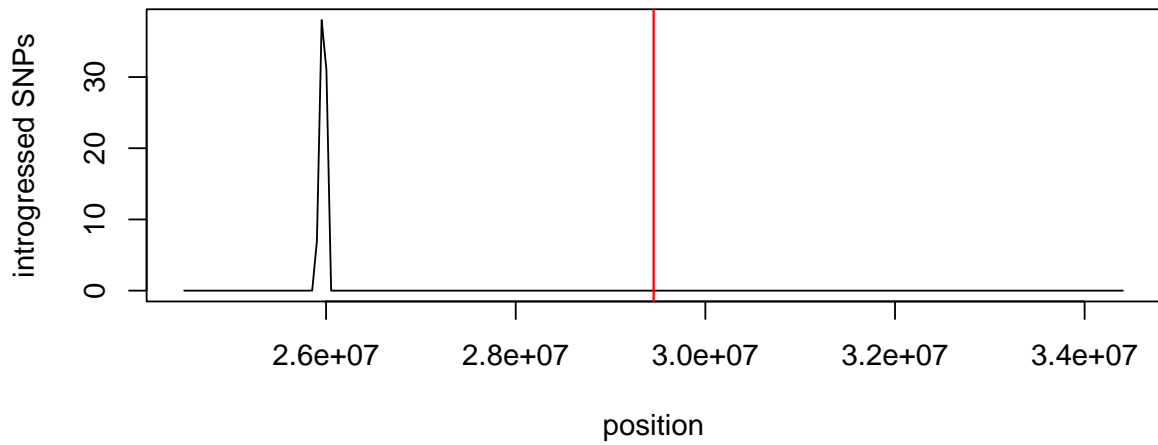

**CEU chr9 CBWD3**

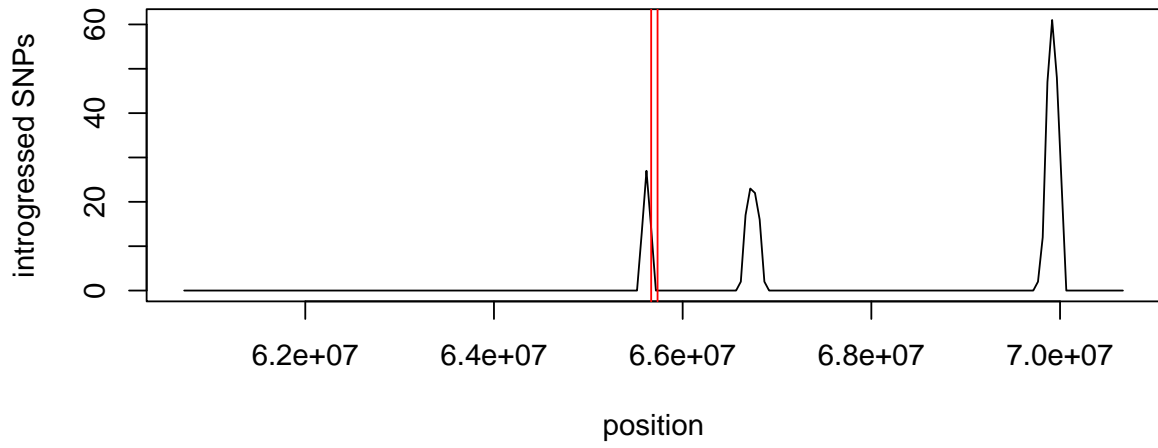

**CHB chr9 CBWD3**

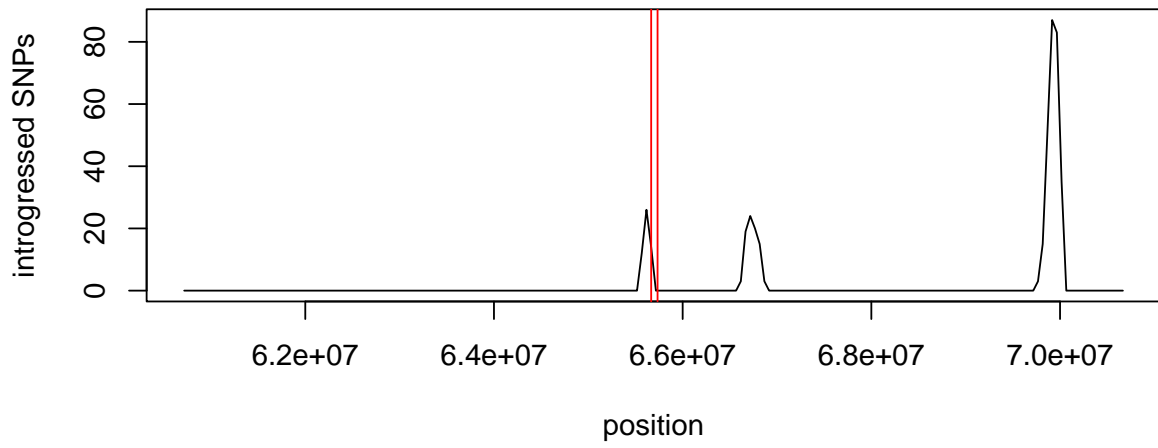

### CEU chr16 CLEC18A

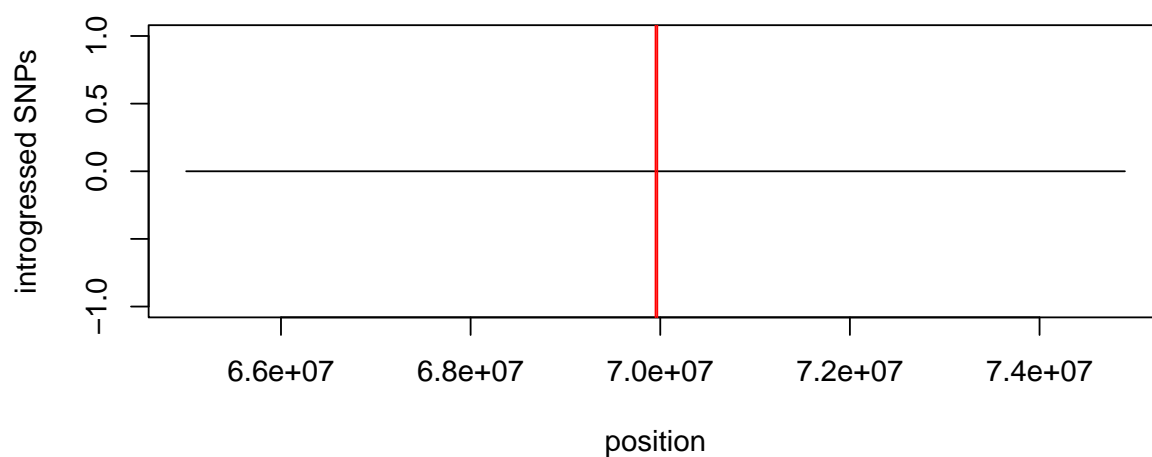

### CHB chr16 CLEC18A

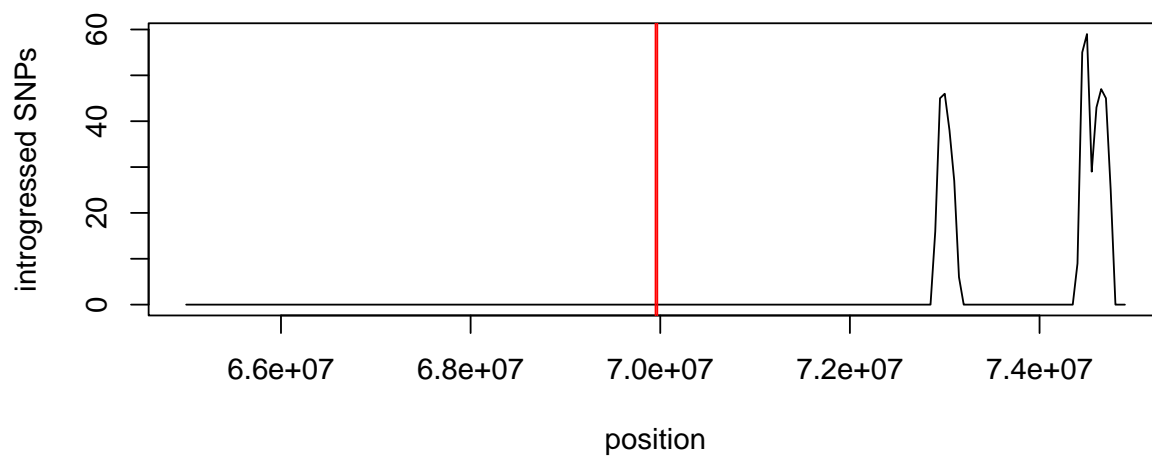

**CEU chr7 CSH**

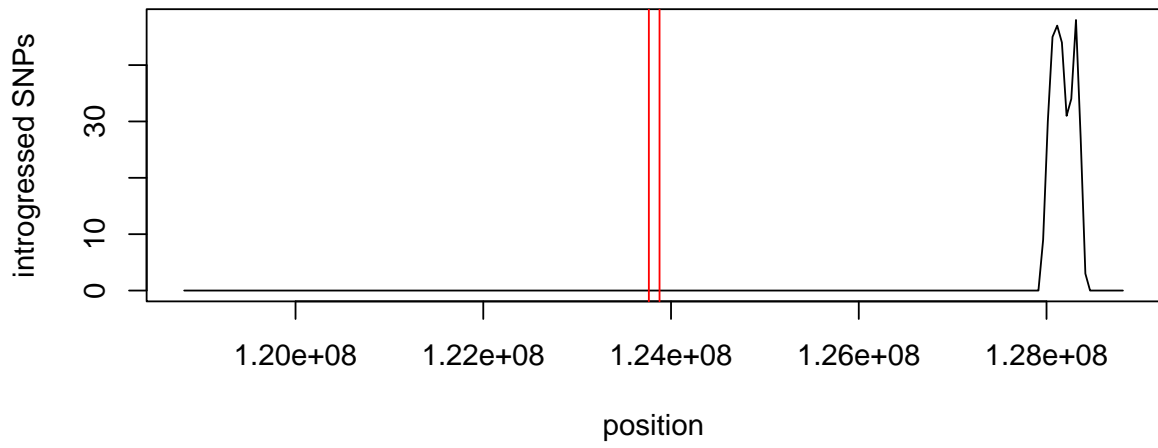

**CHB chr7 CSH**

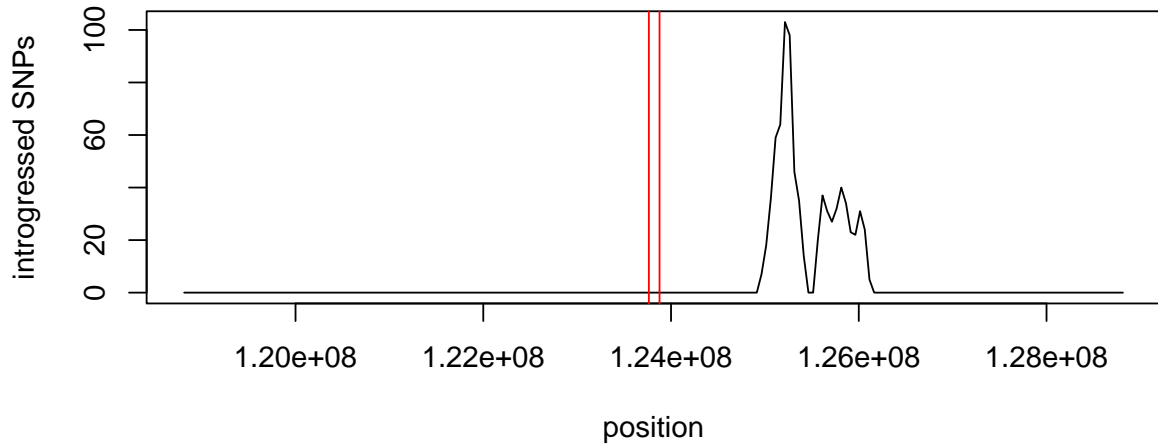

**CEU chr16 CSH**

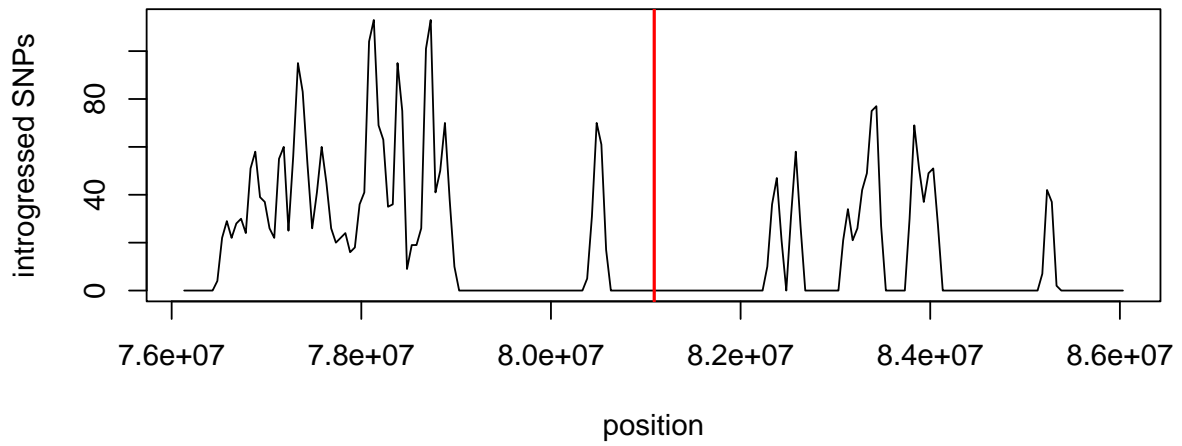

**CHB chr16 CSH**

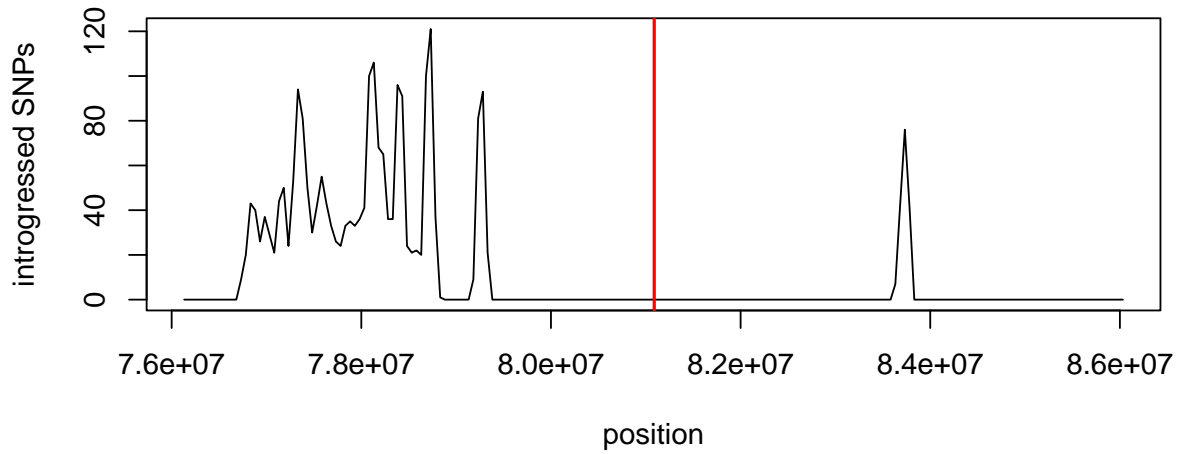



**CEU chr17 CSH**

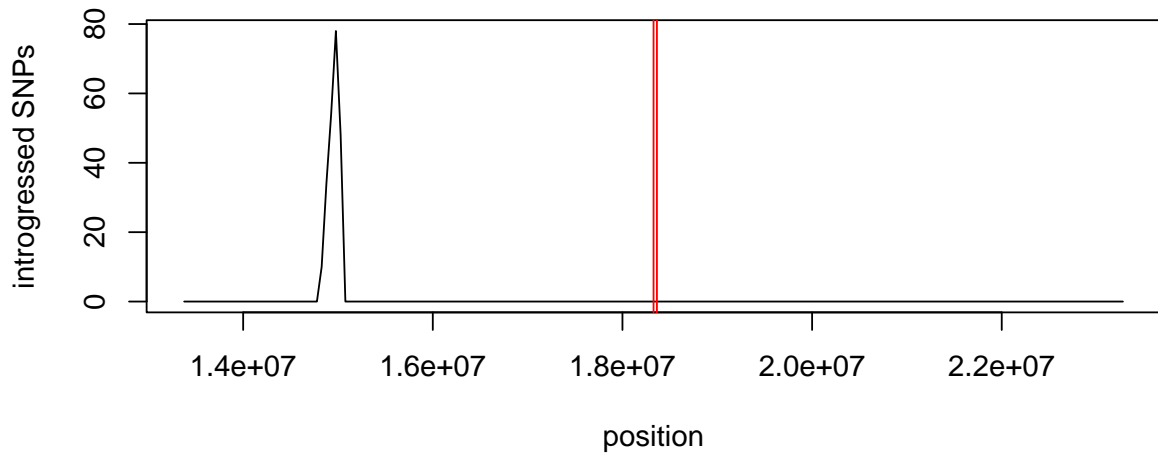

**CHB chr17 CSH**

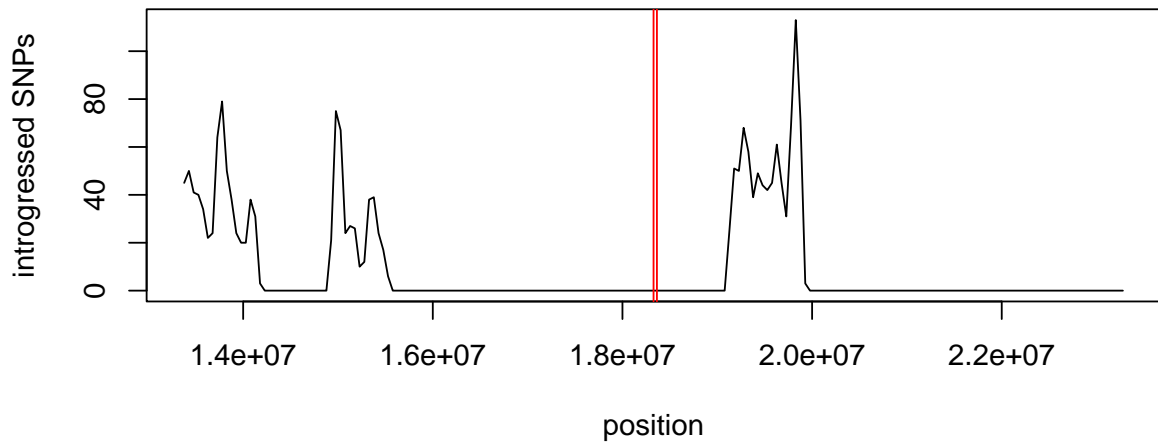

**CEU chr17 CSH**

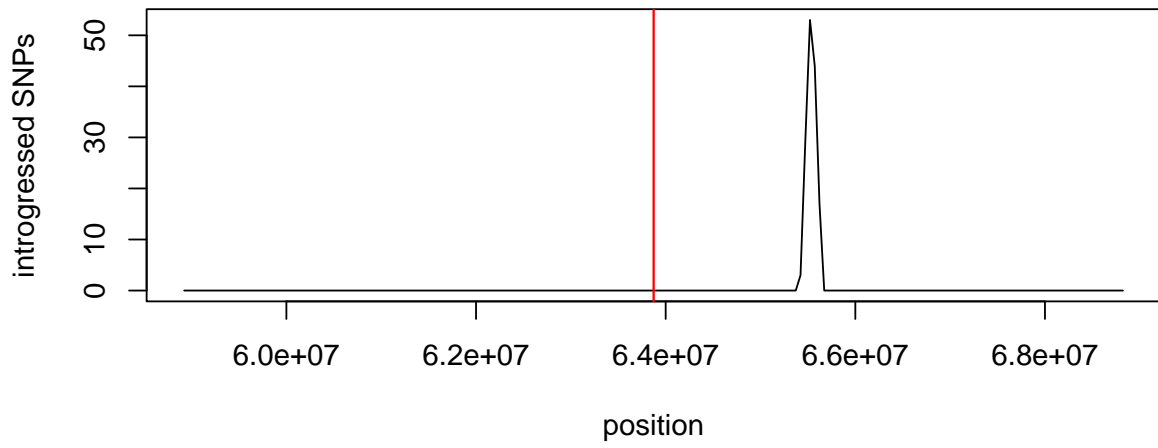

**CHB chr17 CSH**

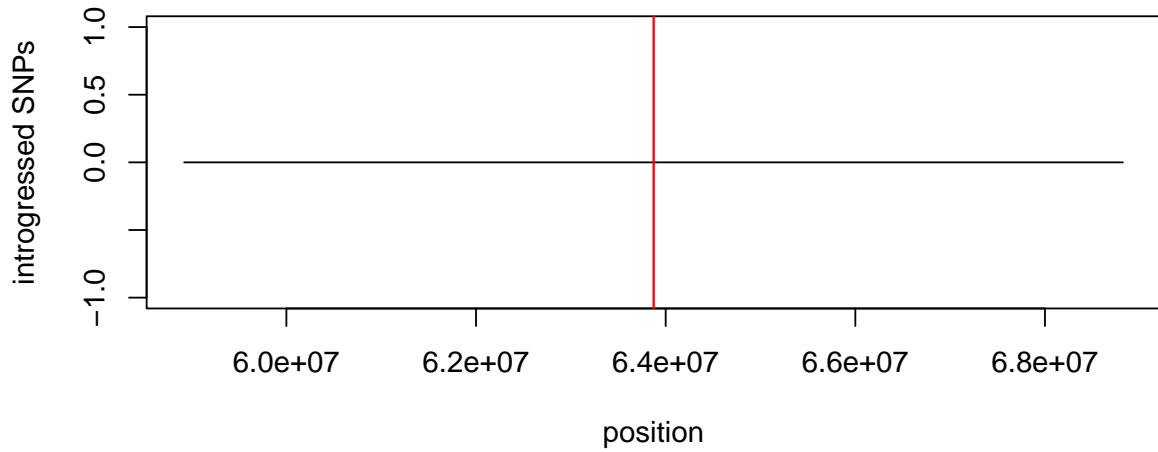

**CEU chr19 CSH**

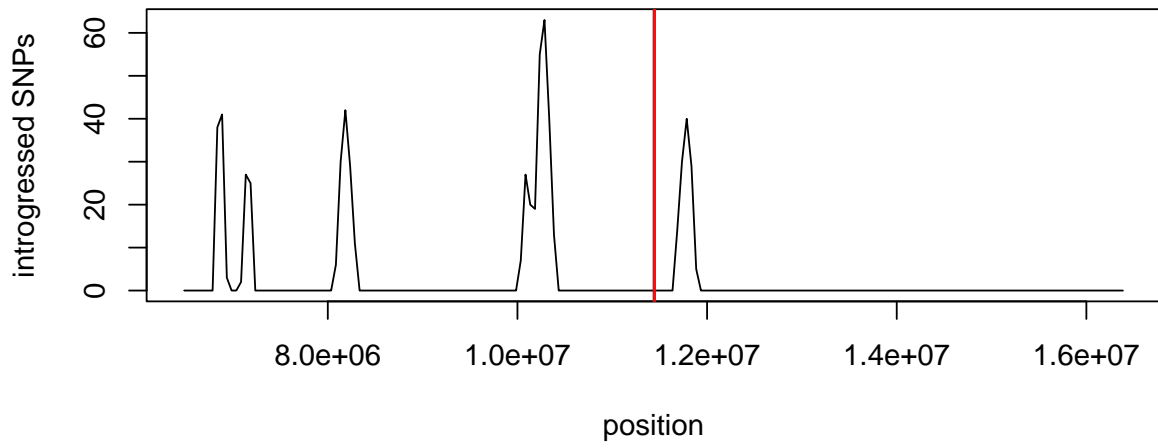

**CHB chr19 CSH**

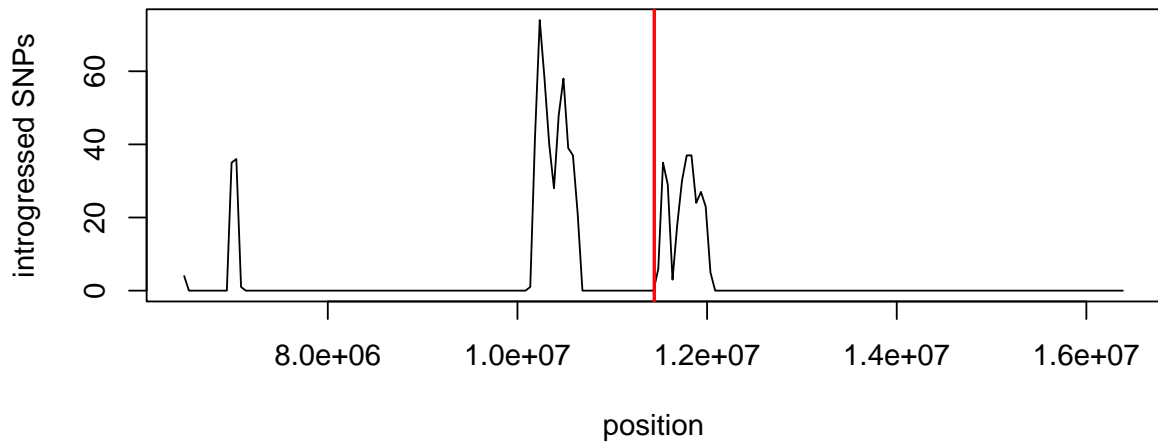

**CEU chr19 CSH**

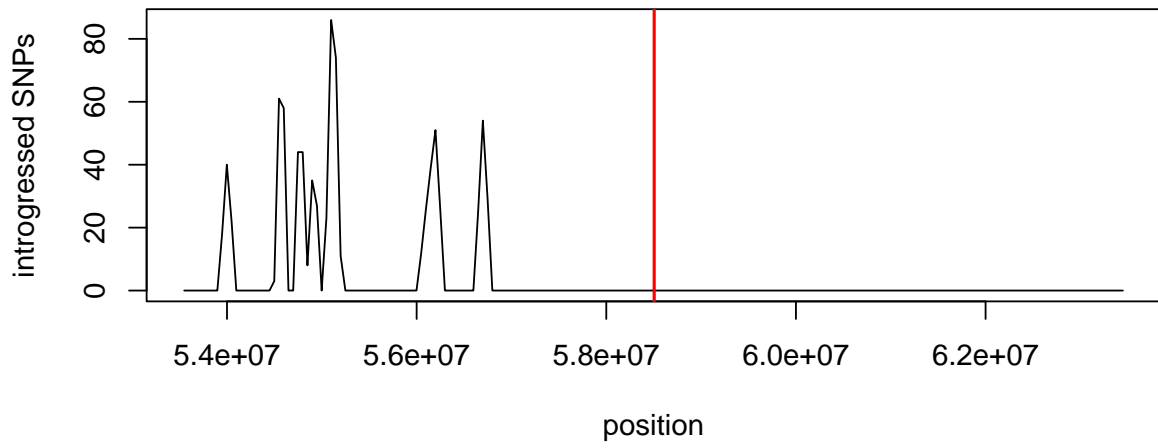

**CHB chr19 CSH**

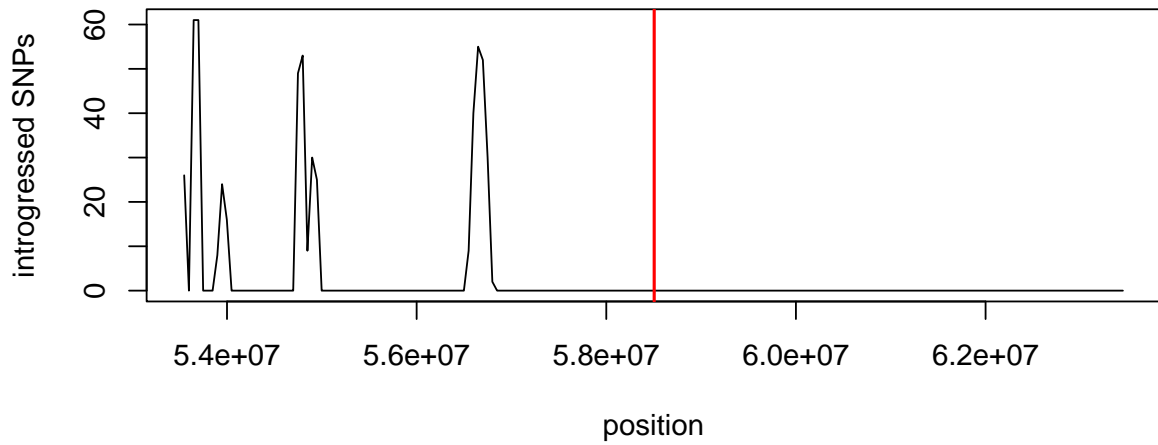

**CEU chr8 DEFA1**

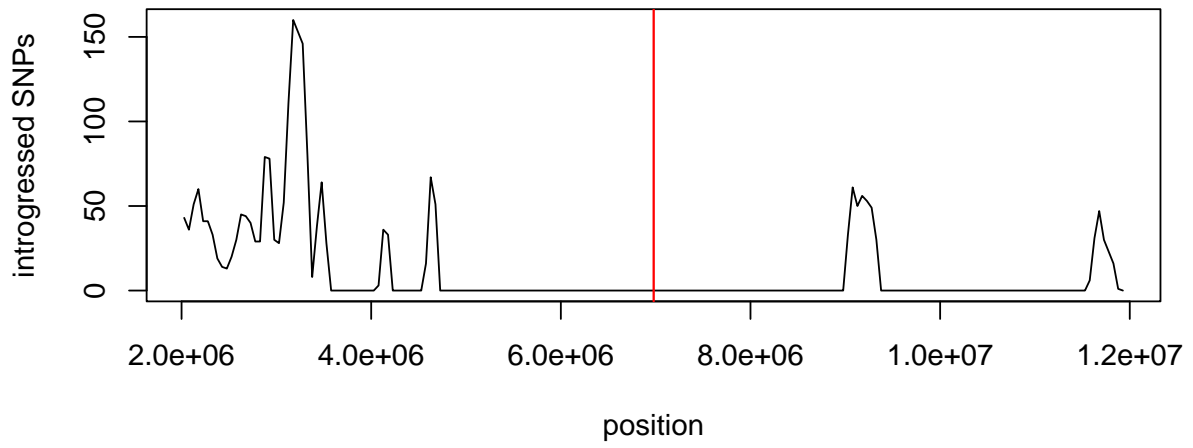

**CHB chr8 DEFA1**

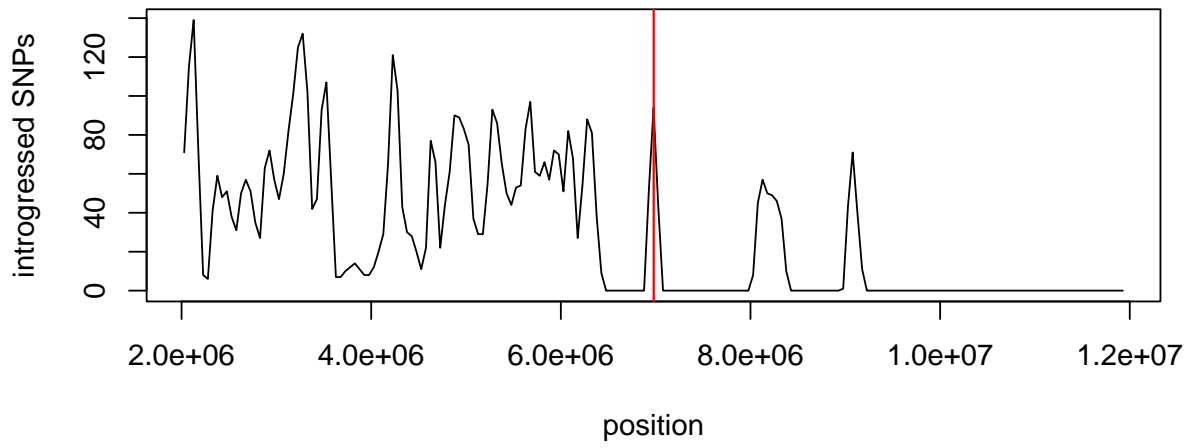

**CEU chr8 DEFB130**

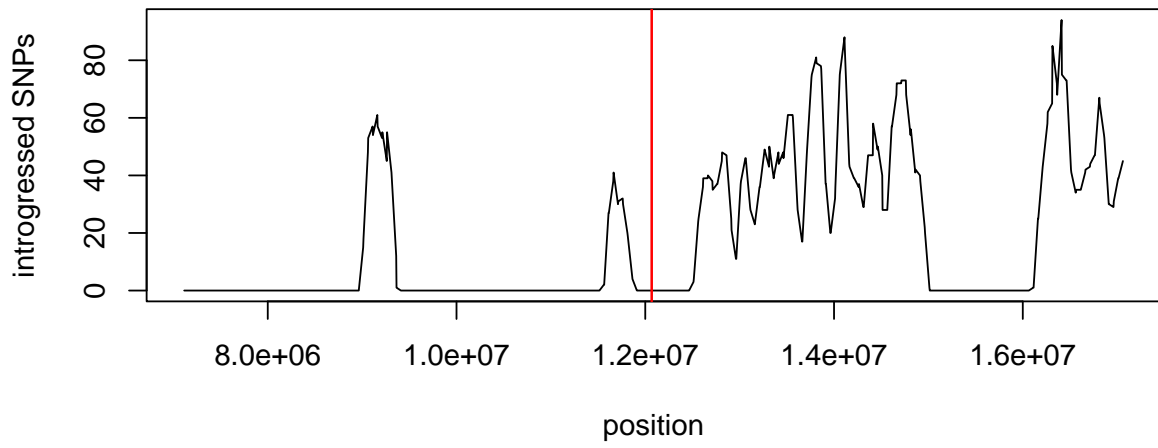

**CHB chr8 DEFB130**

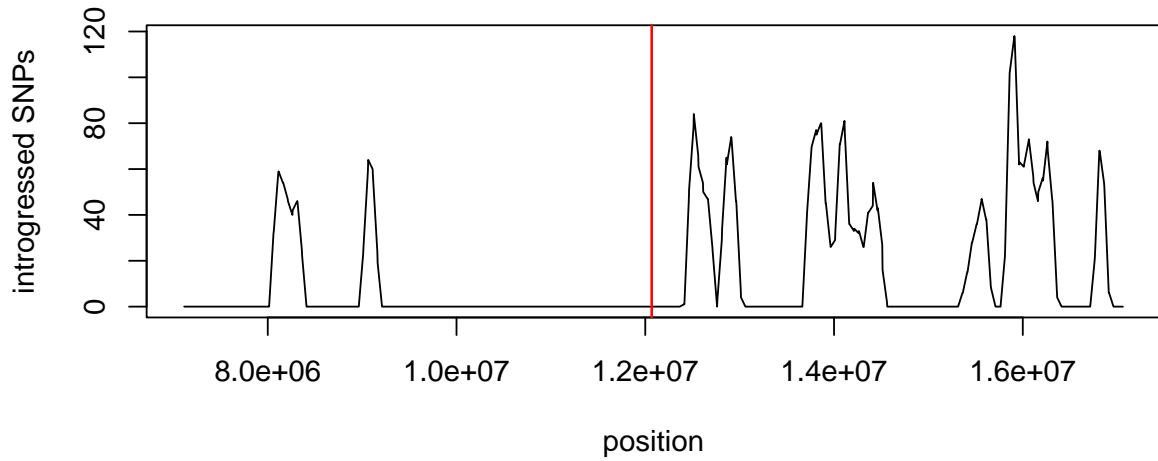

**CEU chr8 DEFB130**

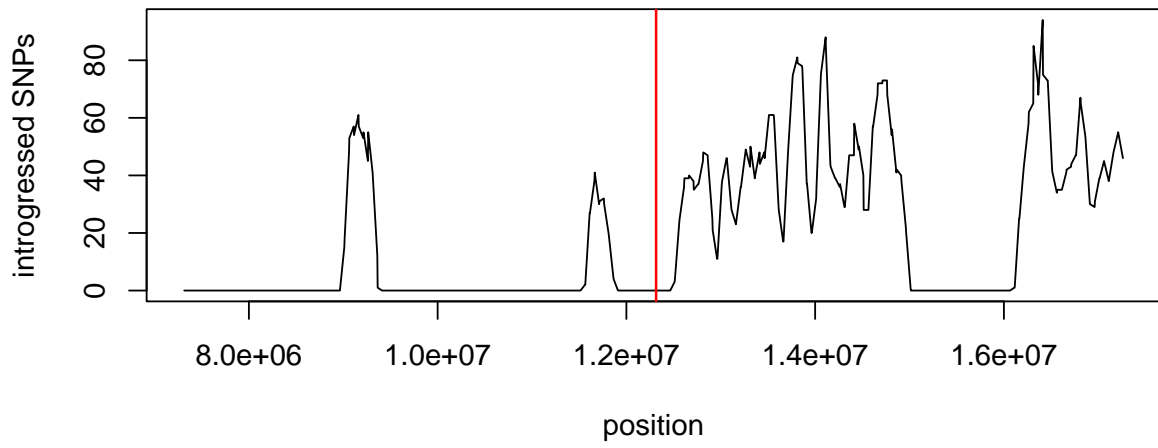

**CHB chr8 DEFB130**

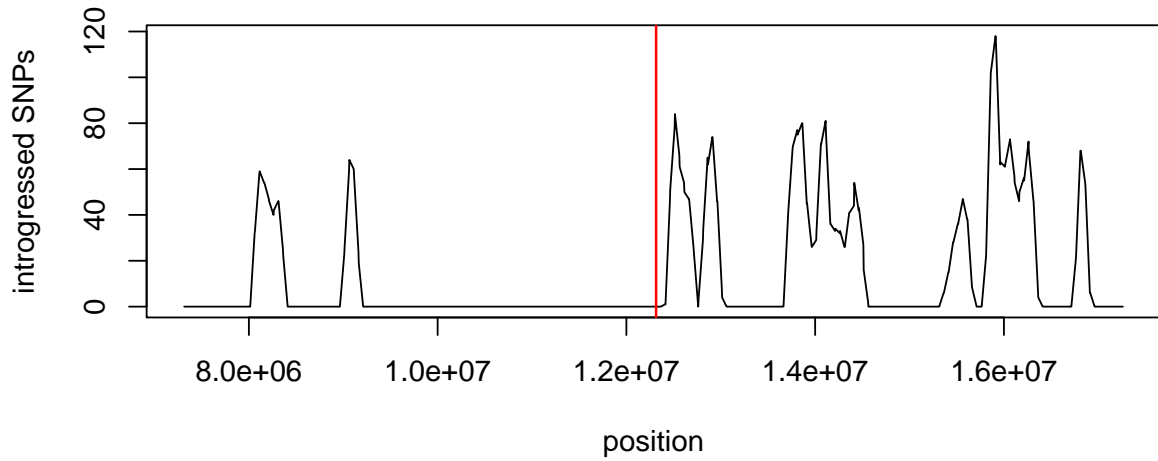

**CEU chr1 FAM72A**

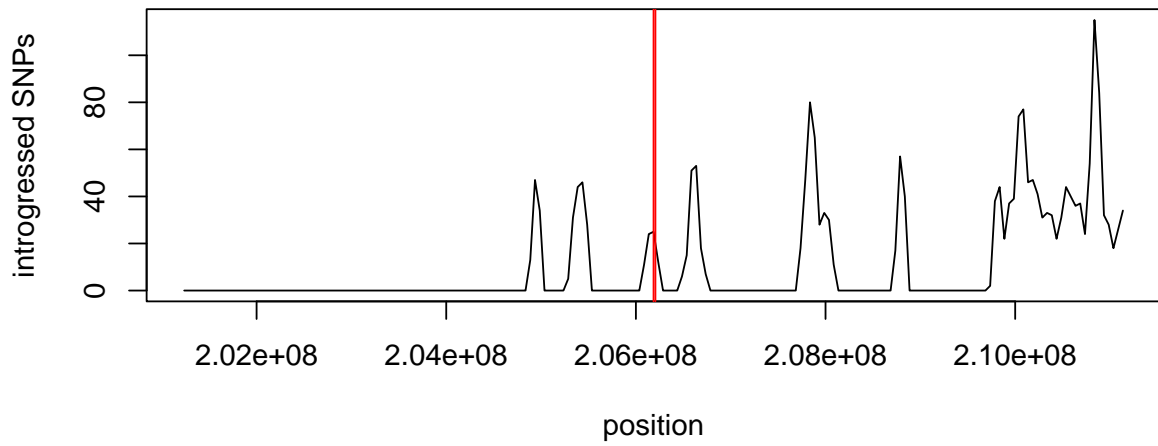

**CHB chr1 FAM72A**

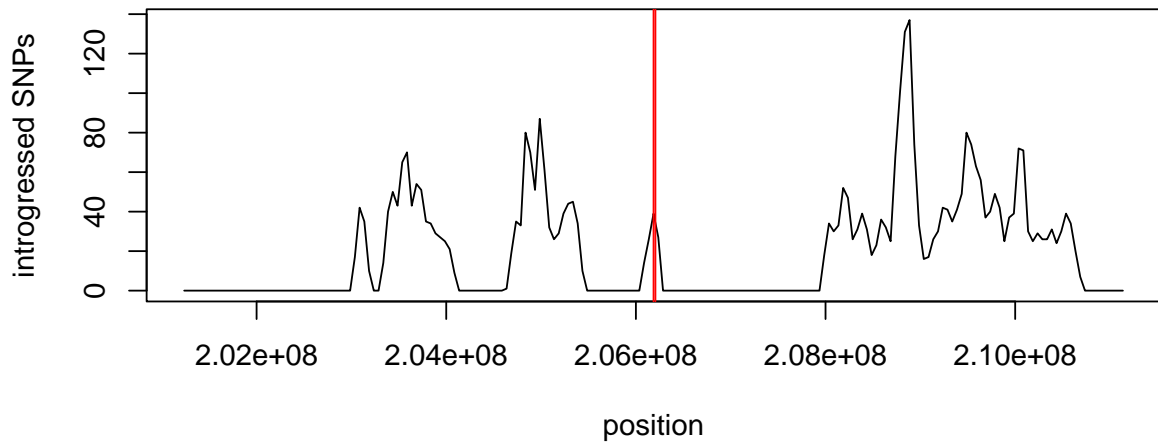



**CEU chr9 FAM75A1**

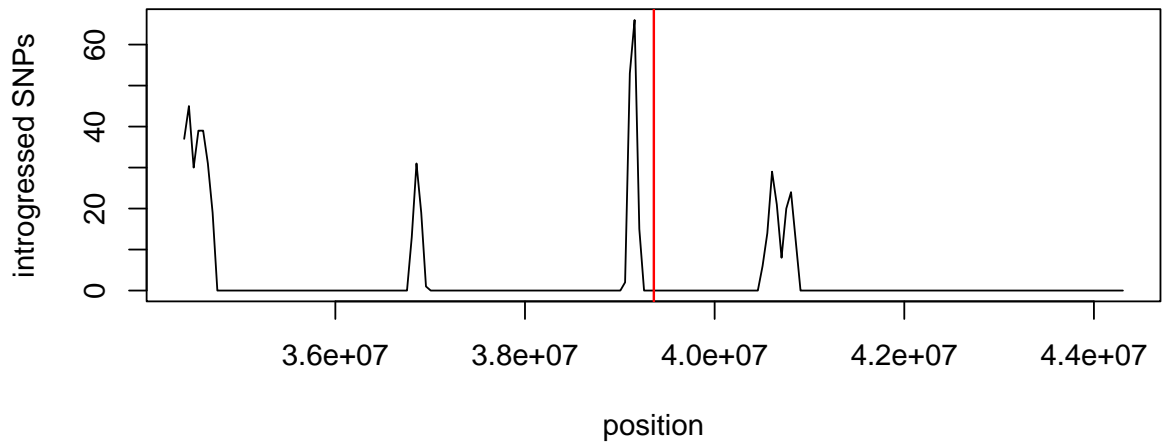

**CHB chr9 FAM75A1**

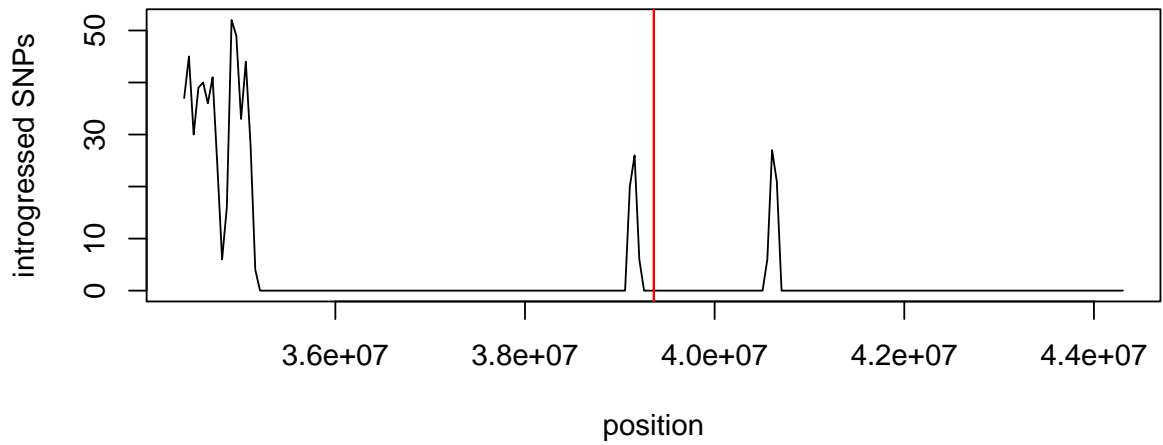

### CEU chr9 FAM75A5

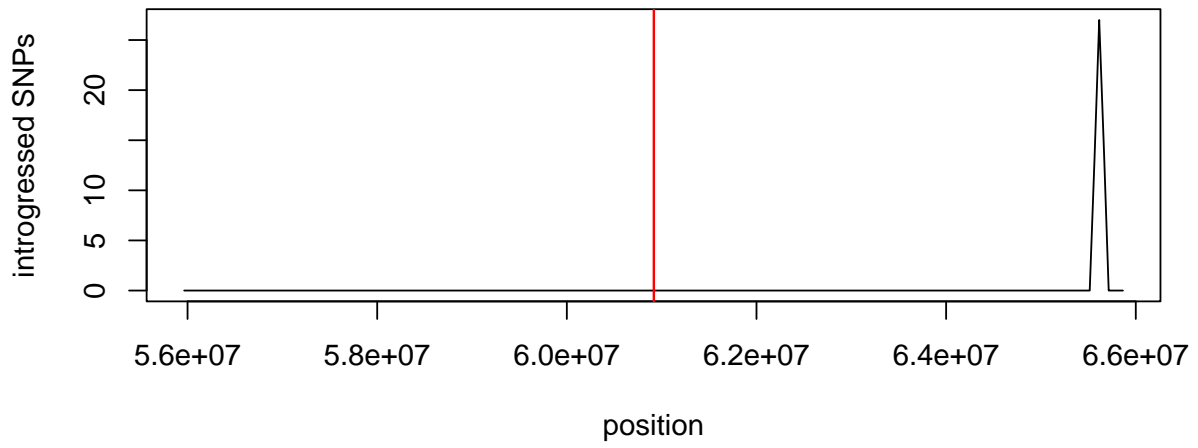

### CHB chr9 FAM75A5

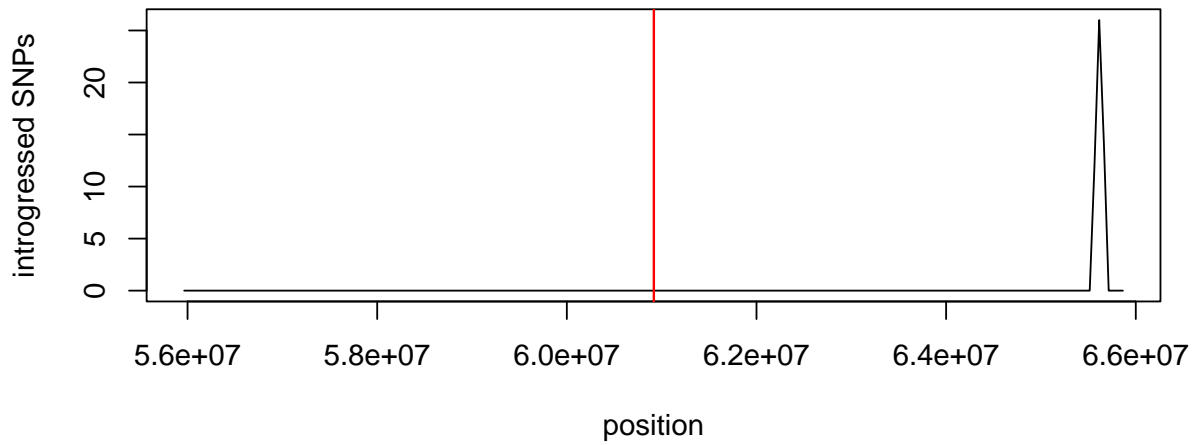

### CEU chr9 FOXD4L2

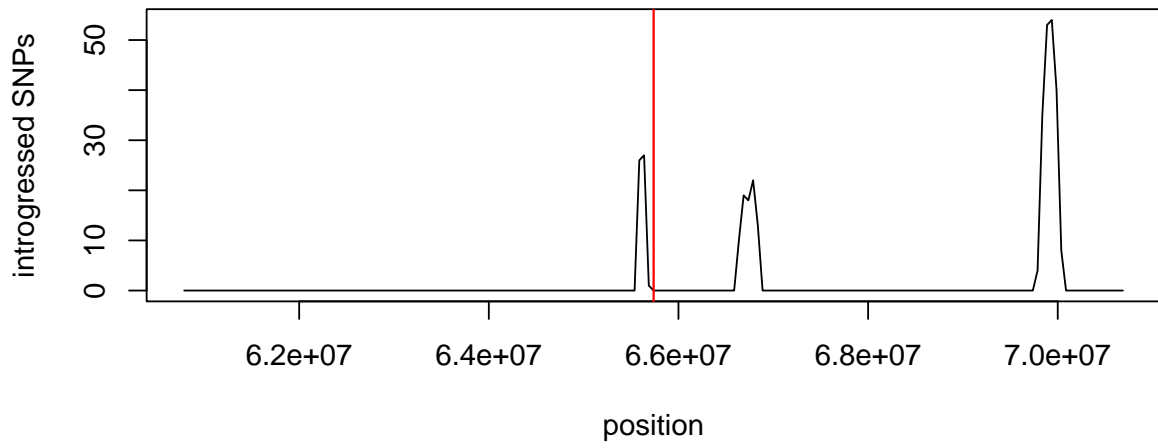

### CHB chr9 FOXD4L2

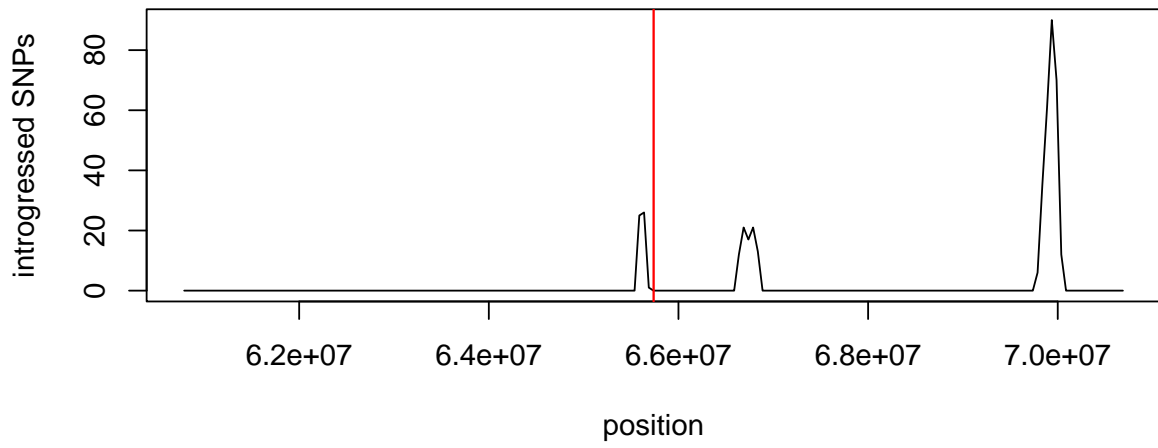

### CEU chr15 GOLGA6L9

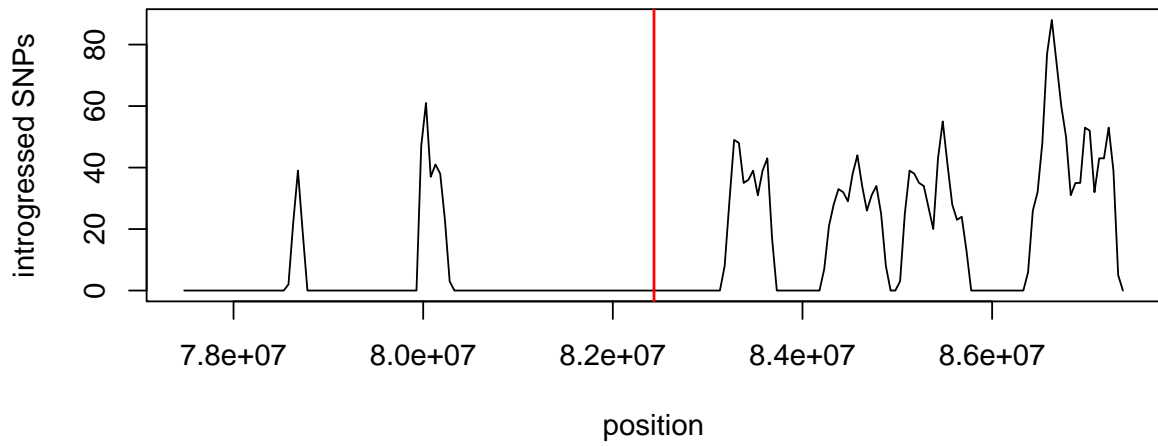

### CHB chr15 GOLGA6L9

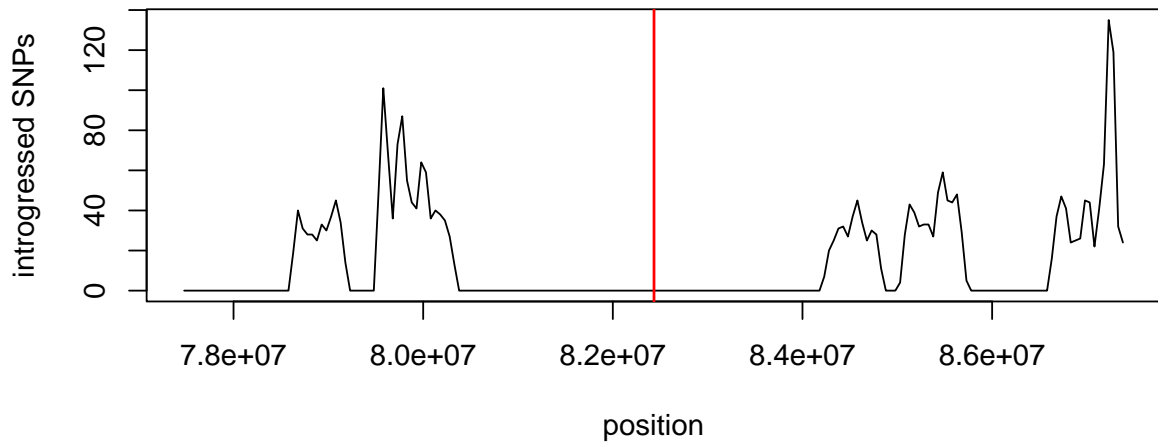

**CEU chr15 GOLGA8G**

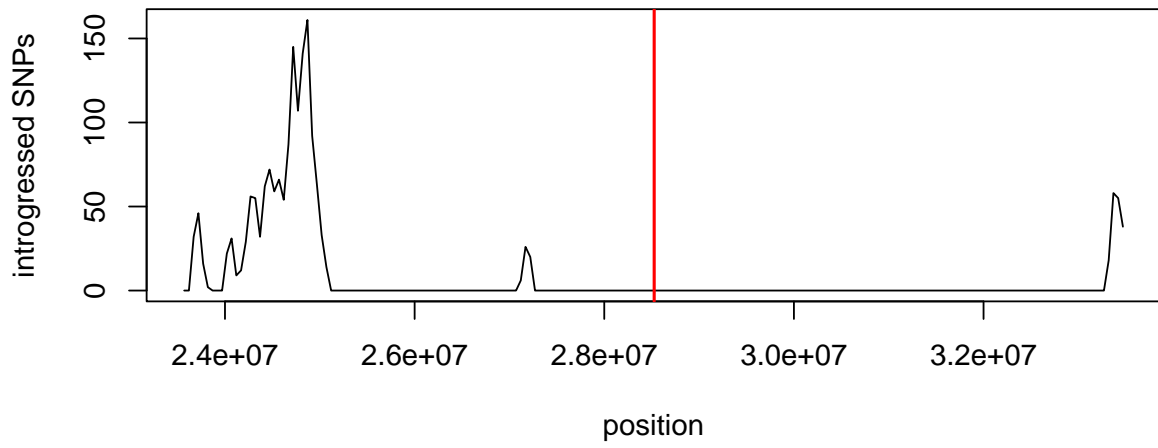

**CHB chr15 GOLGA8G**

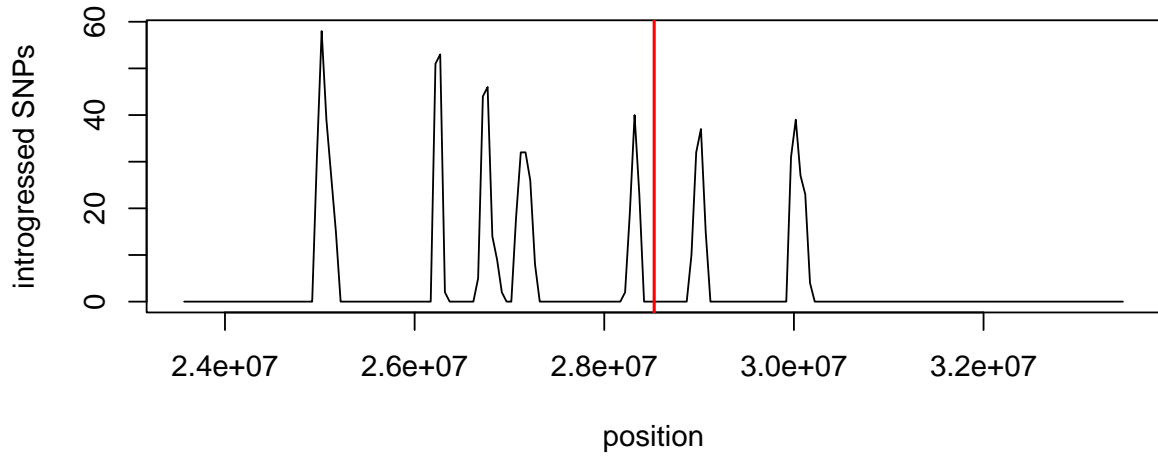

**CEU chr1 HIST2**

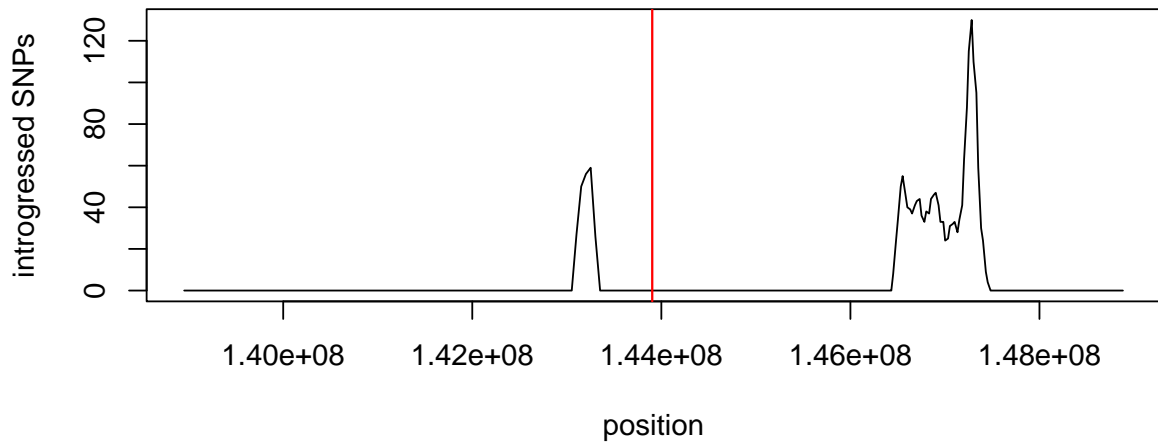

**CHB chr1 HIST2**

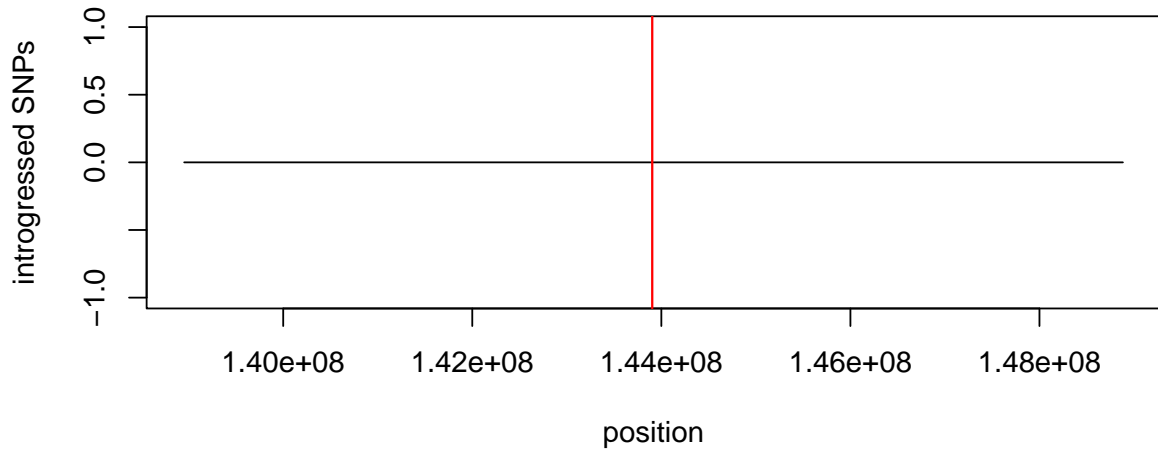

### CEU chr1 HIST2

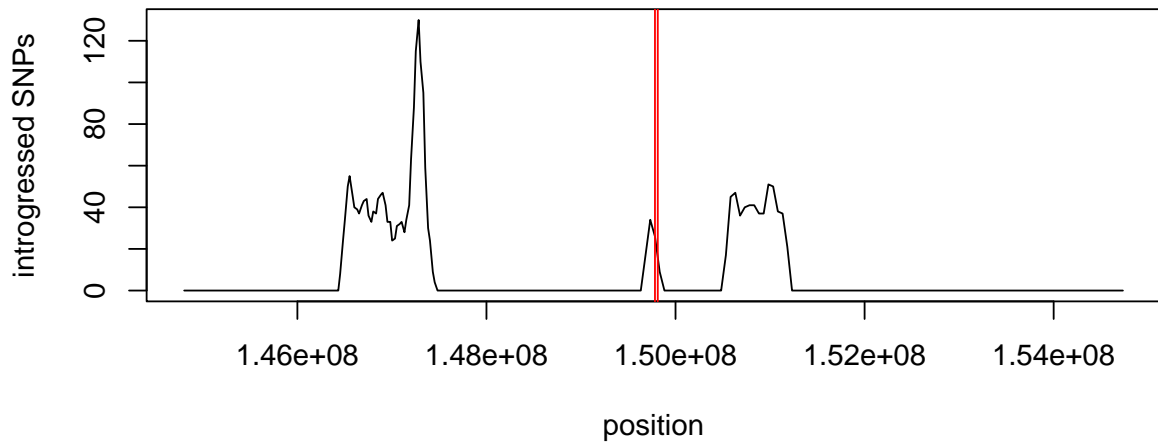

### CHB chr1 HIST2

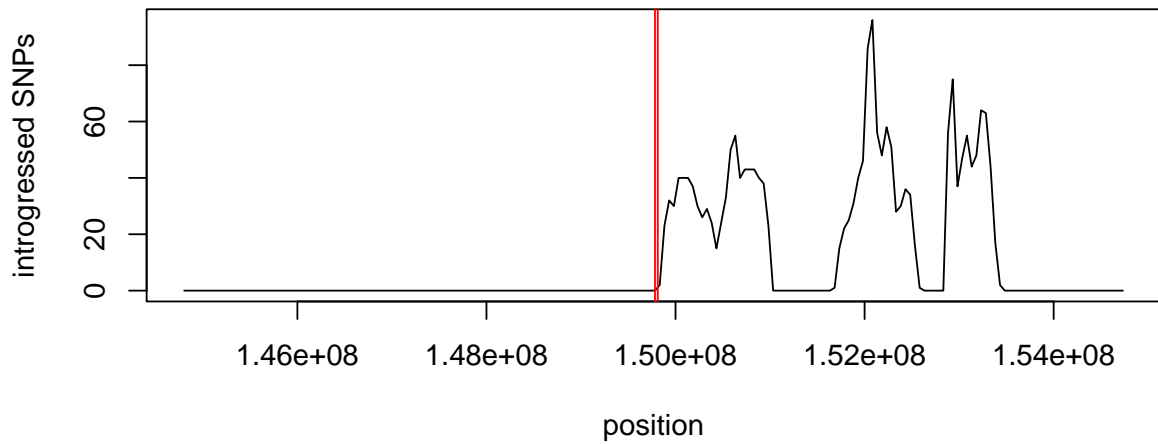

**CEU chr2 LIMS3**

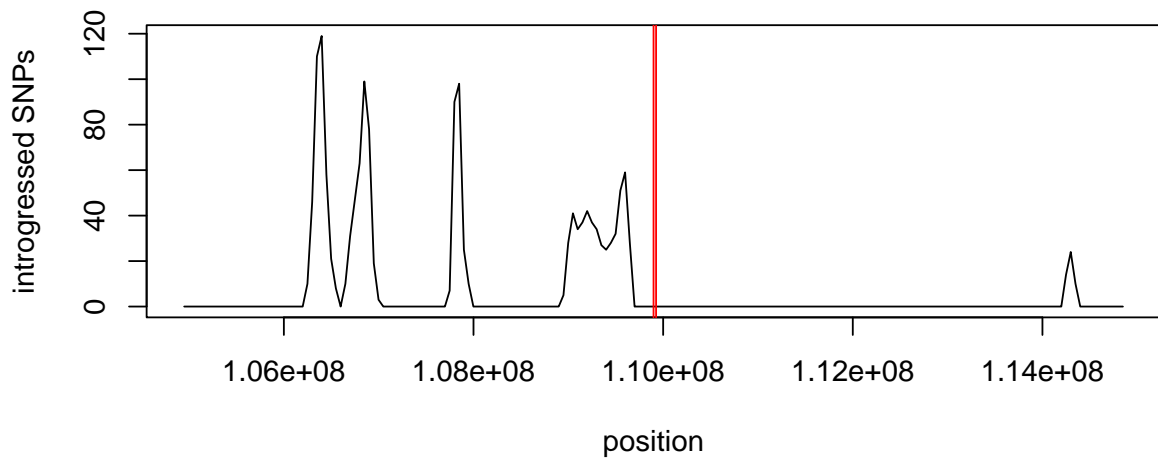

**CHB chr2 LIMS3**

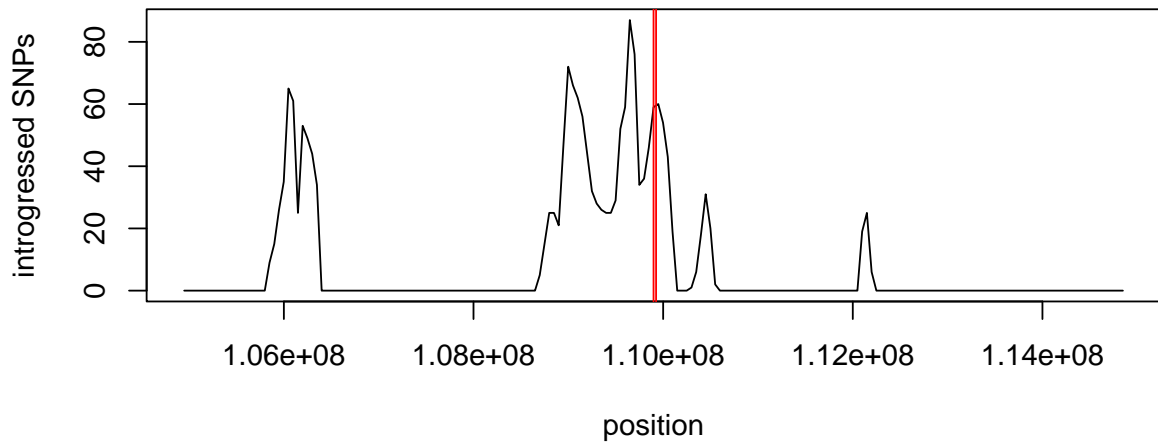



### CEU chr7 MUC12

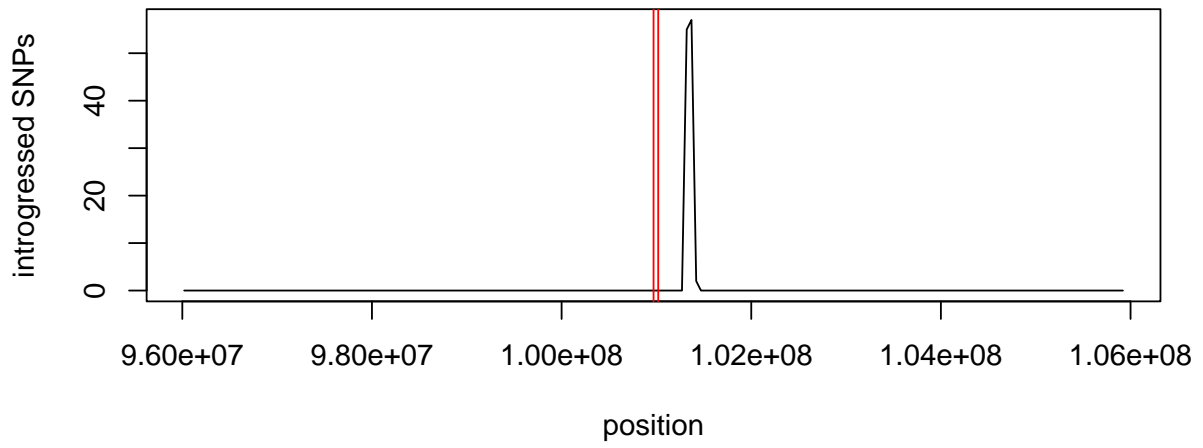

### CHB chr7 MUC12

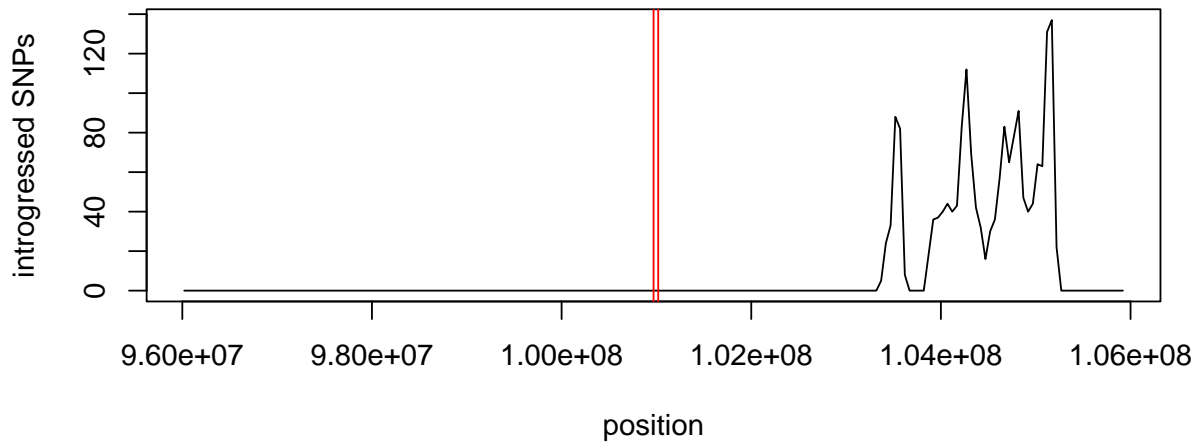

**CEU chr1 NBPF11**

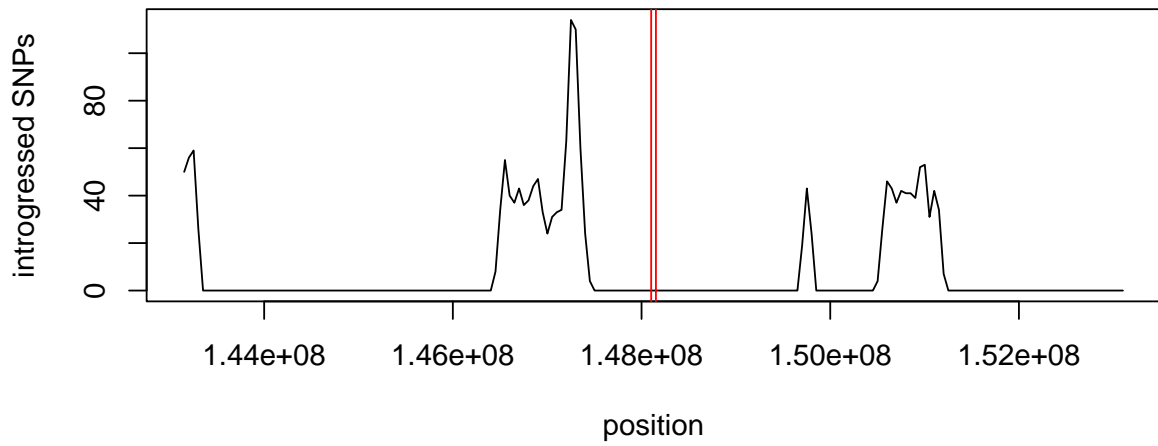

**CHB chr1 NBPF11**

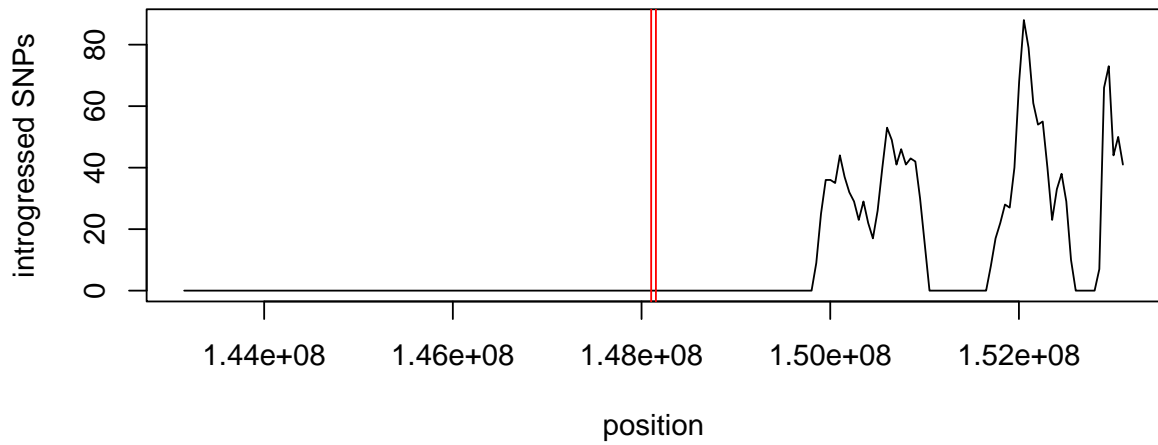

**CEU chr1 NBPF16**

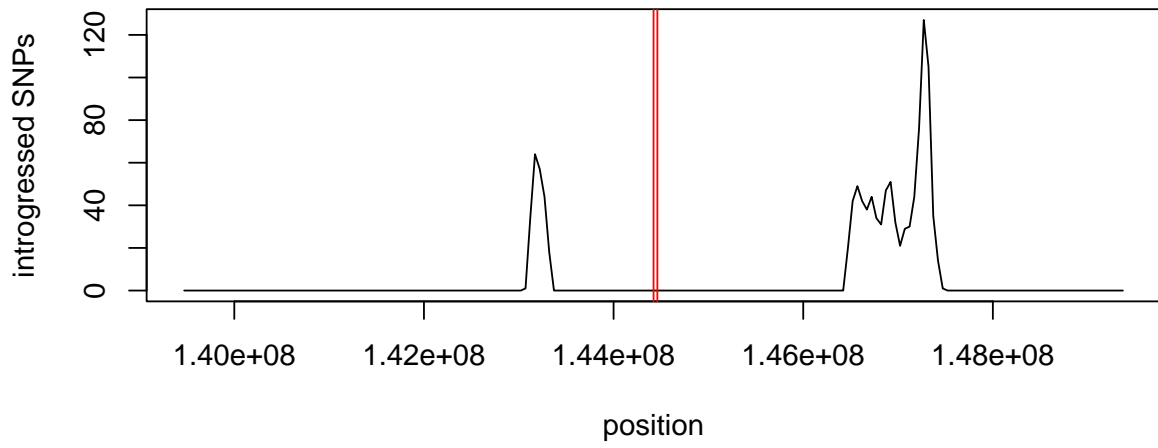

**CHB chr1 NBPF16**

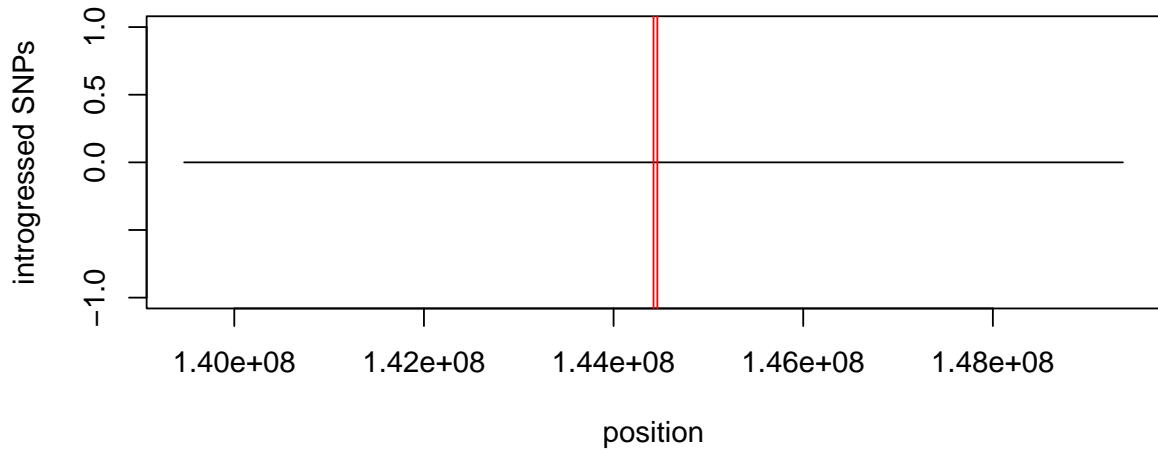

**CEU chr1 NPIP**

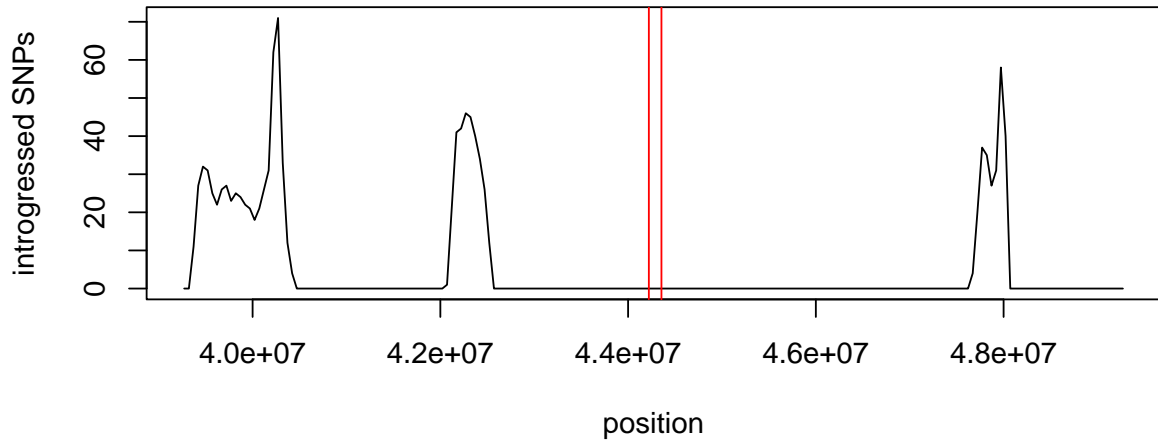

**CHB chr1 NPIP**

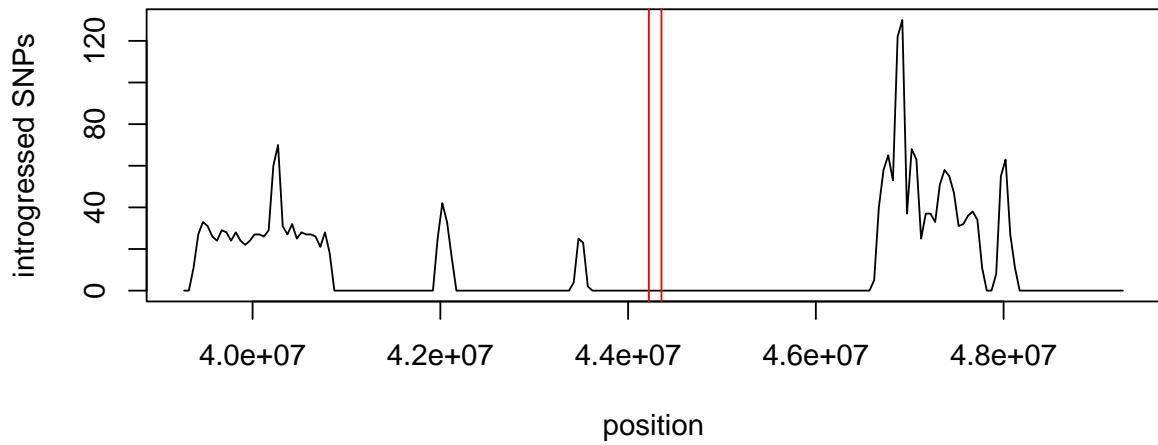

**CEU chr16 NPIP**

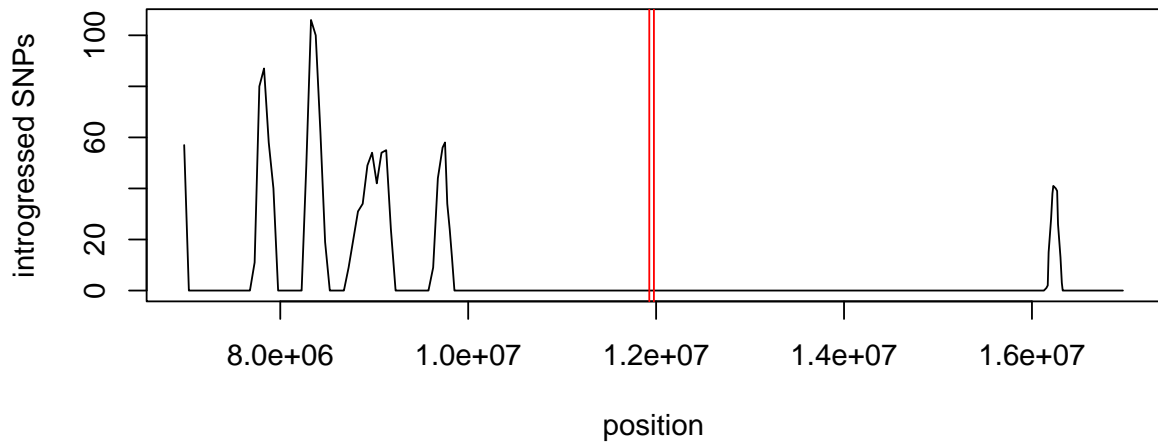

**CHB chr16 NPIP**

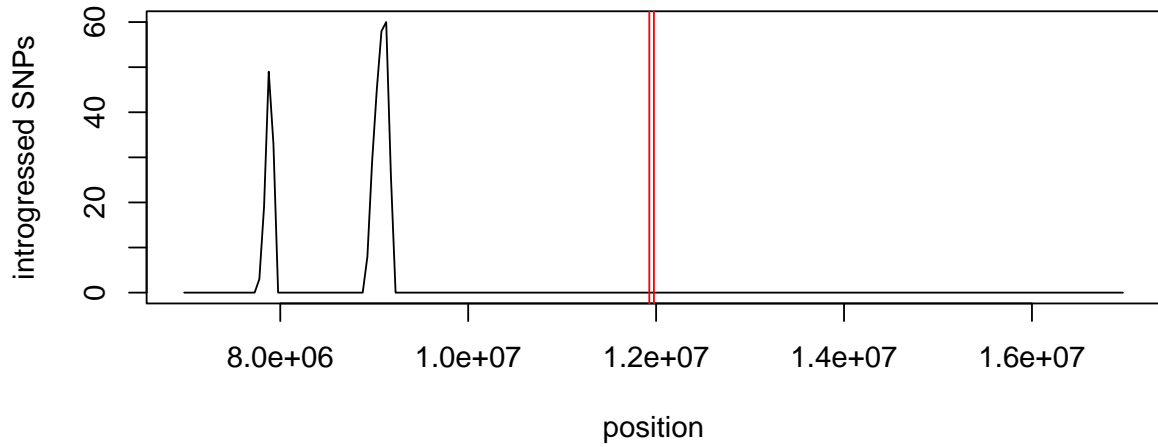

**CEU chr16 NPIP**

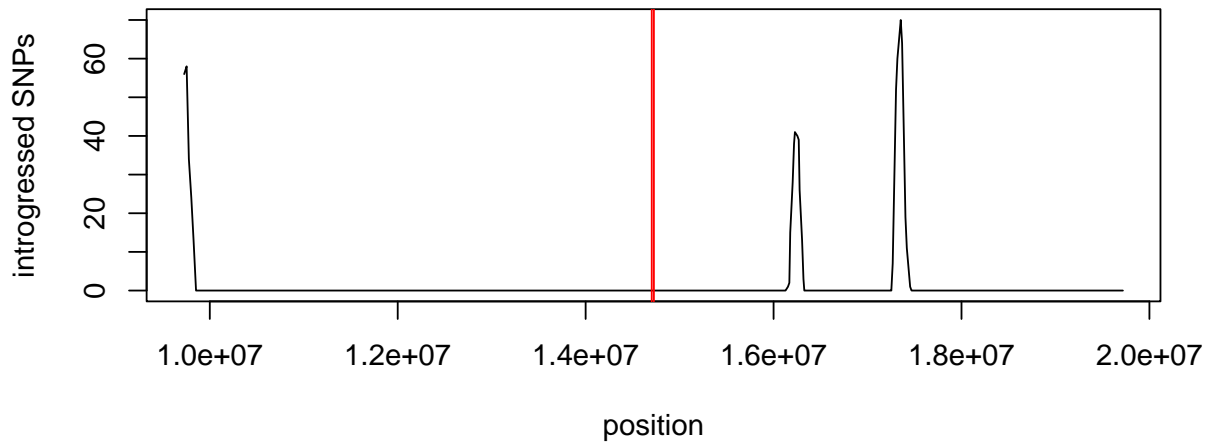

**CHB chr16 NPIP**

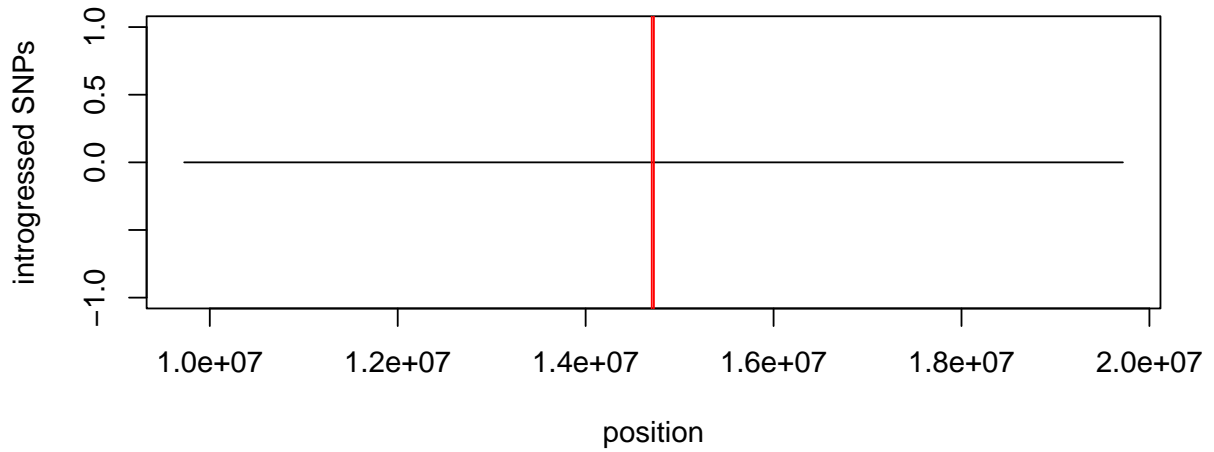

**CEU chr16 NPIP**

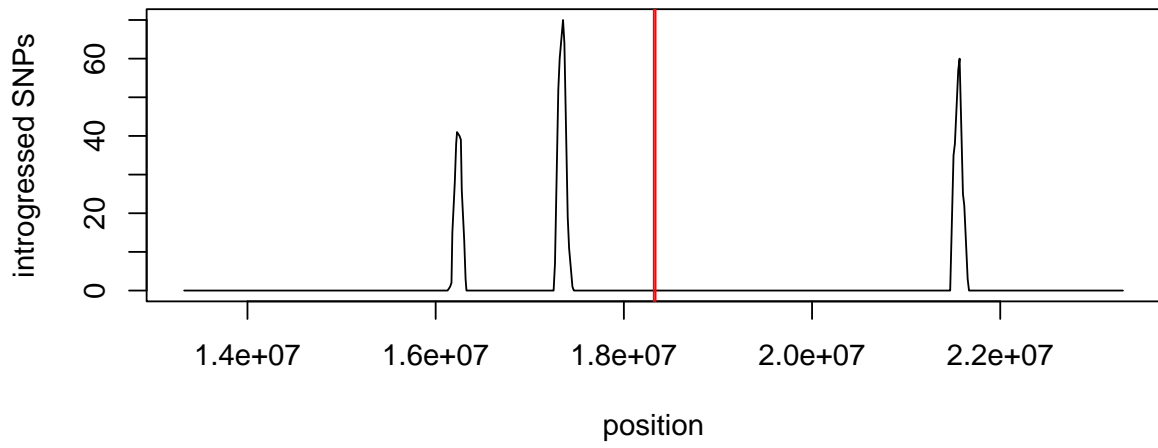

**CHB chr16 NPIP**

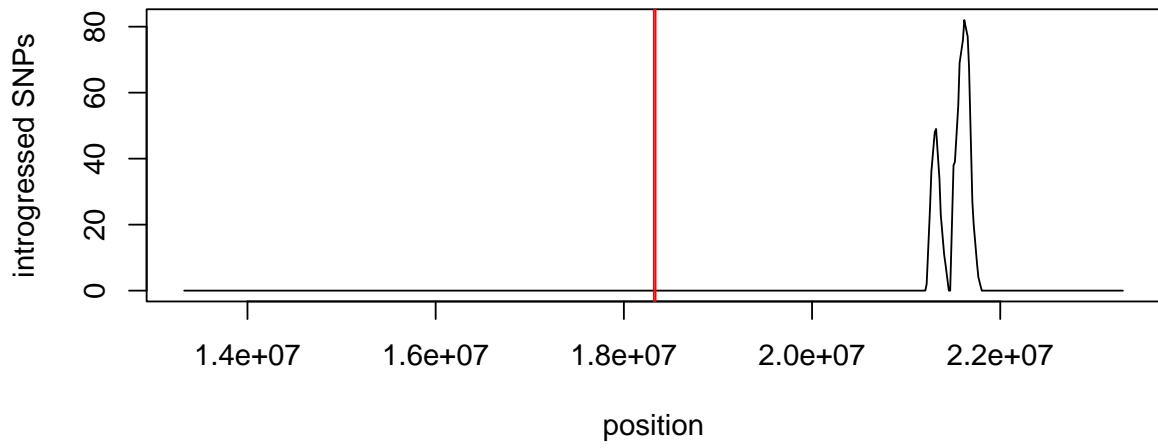

**CEU chr16 NPIP**

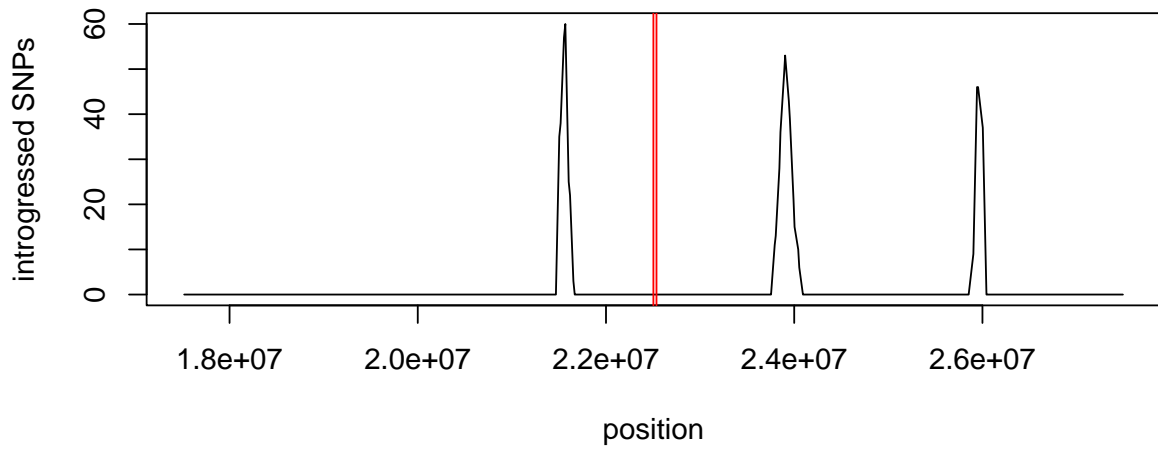

**CHB chr16 NPIP**

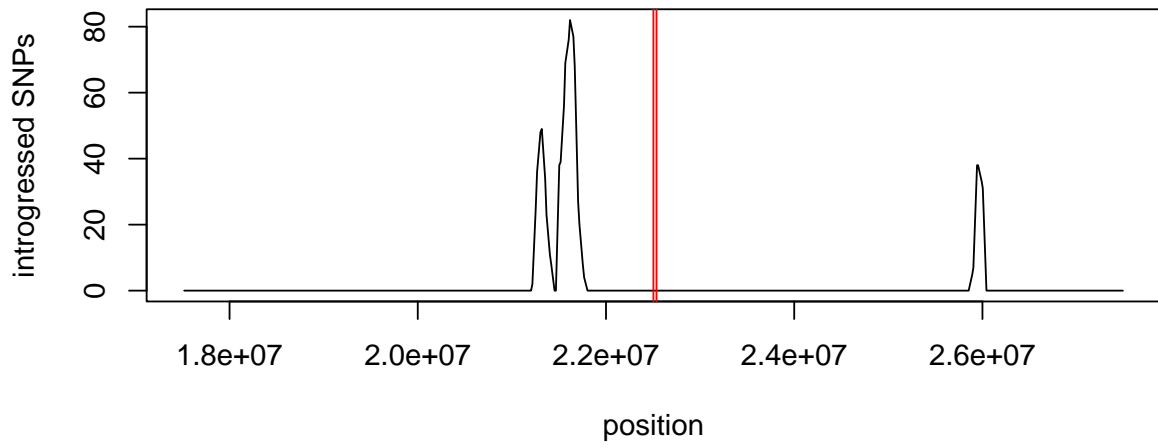



**CEU chr16 NPIP**

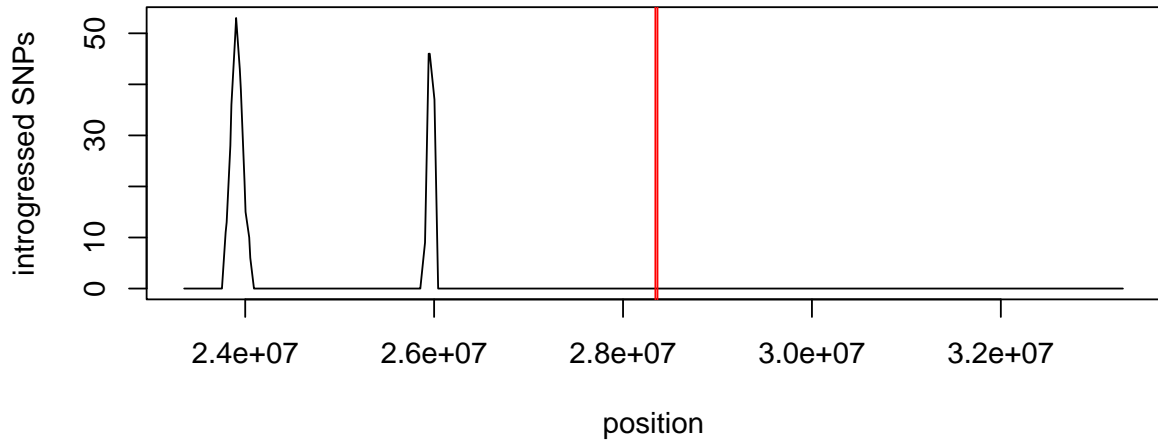

**CHB chr16 NPIP**

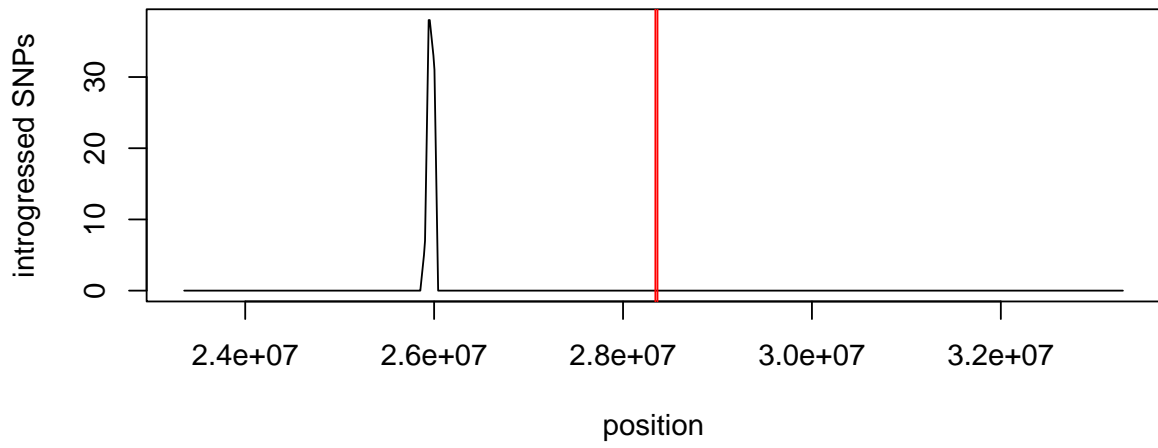

**CEU chr16 NPIP**

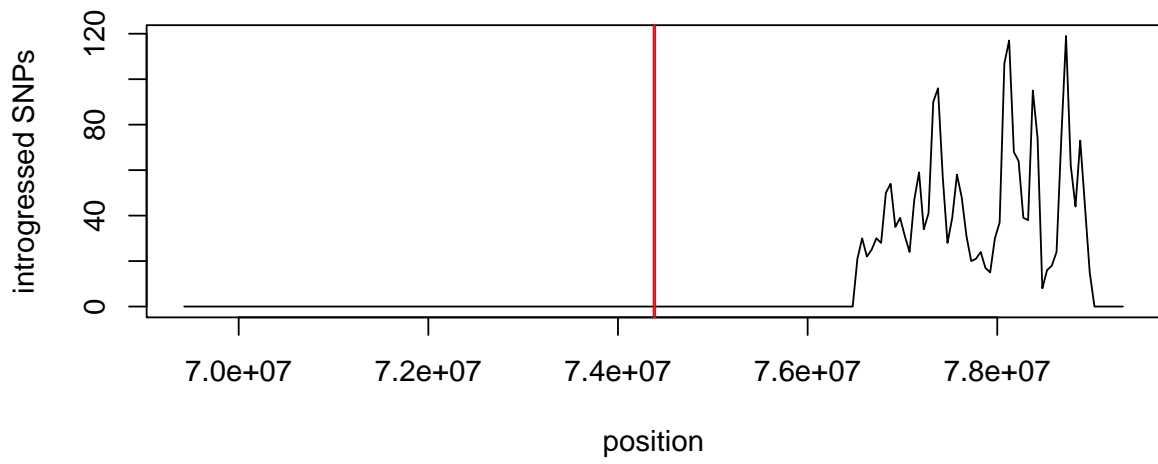

**CHB chr16 NPIP**

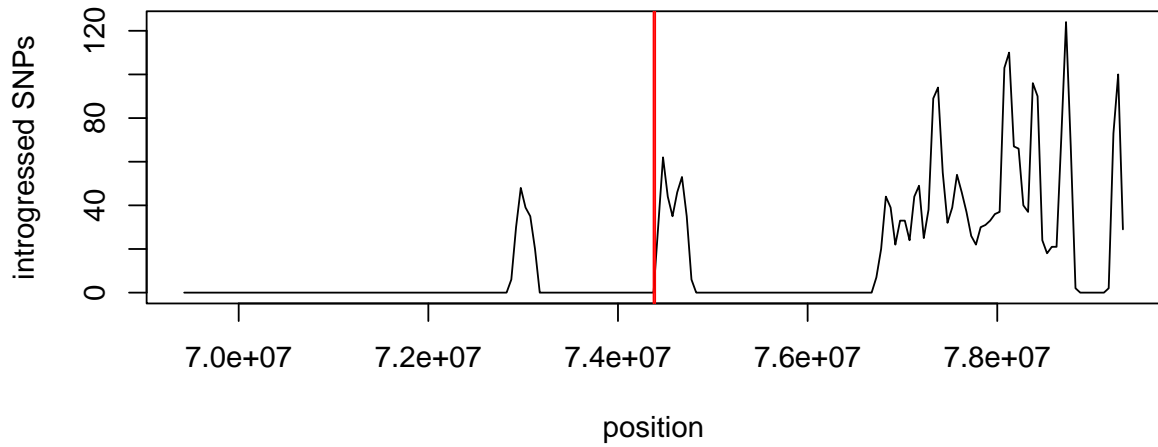

### CEU chr11 PGA3

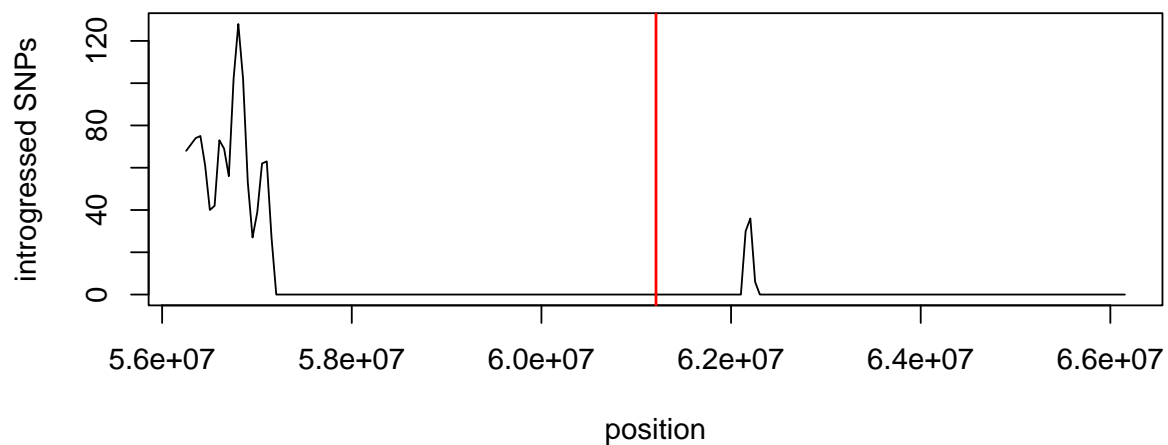

### CHB chr11 PGA3

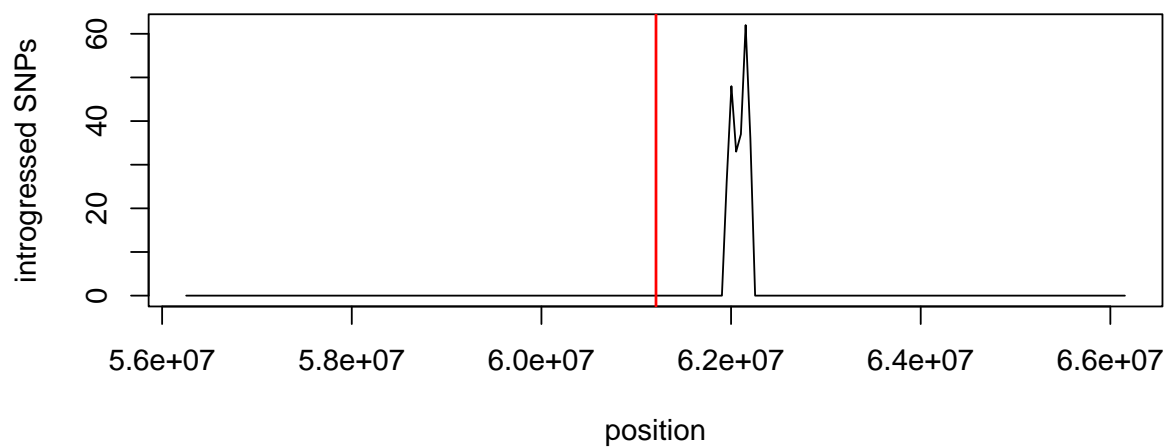

**CEU chr1 PRAMEF14**

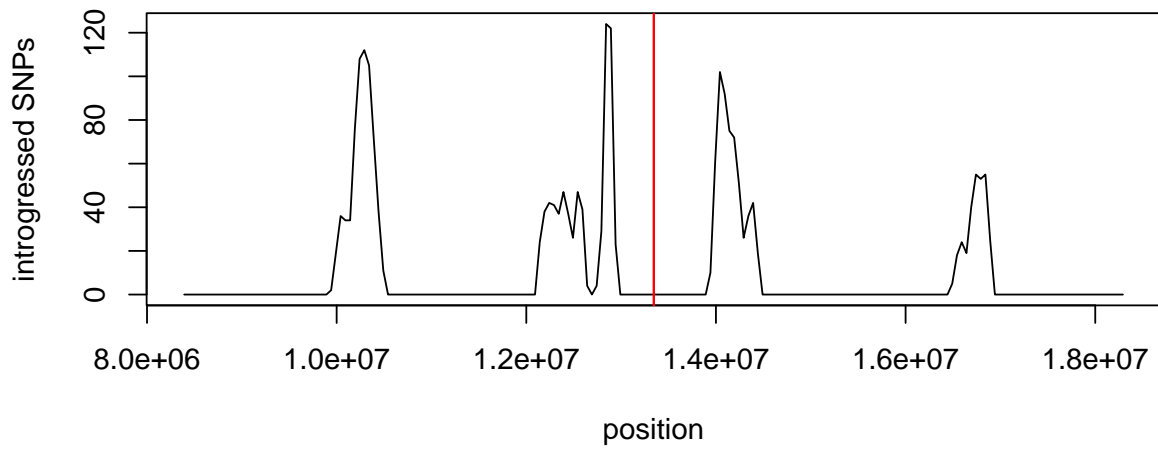

**CHB chr1 PRAMEF14**

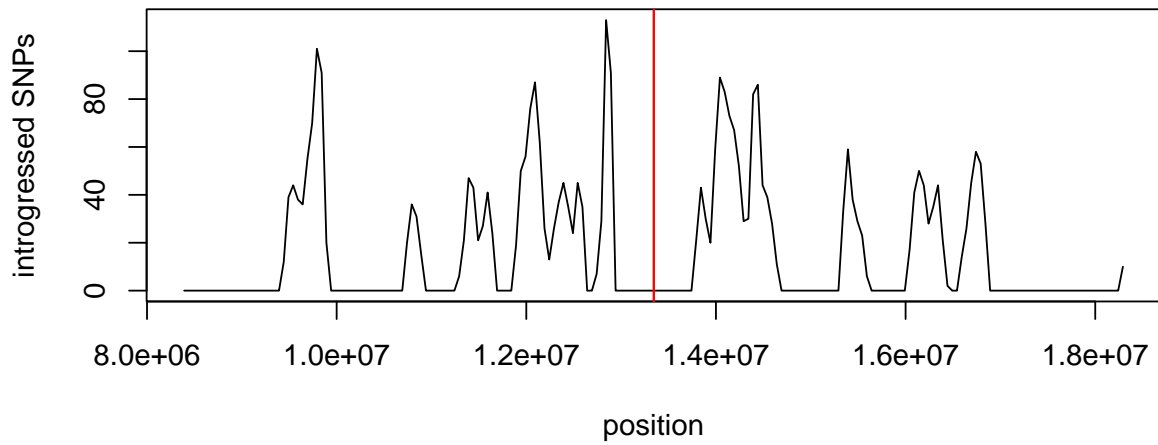

**CEU chr1 PRAMEF20**

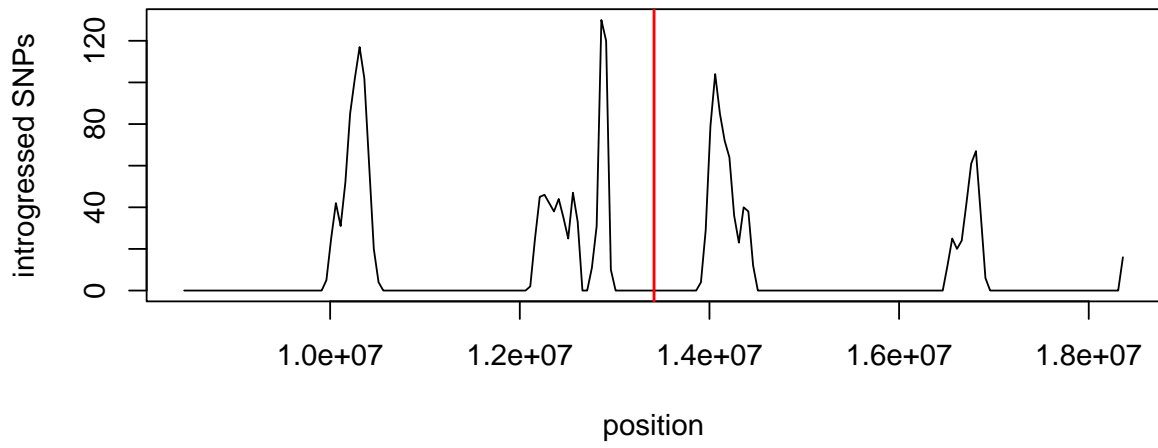

**CHB chr1 PRAMEF20**

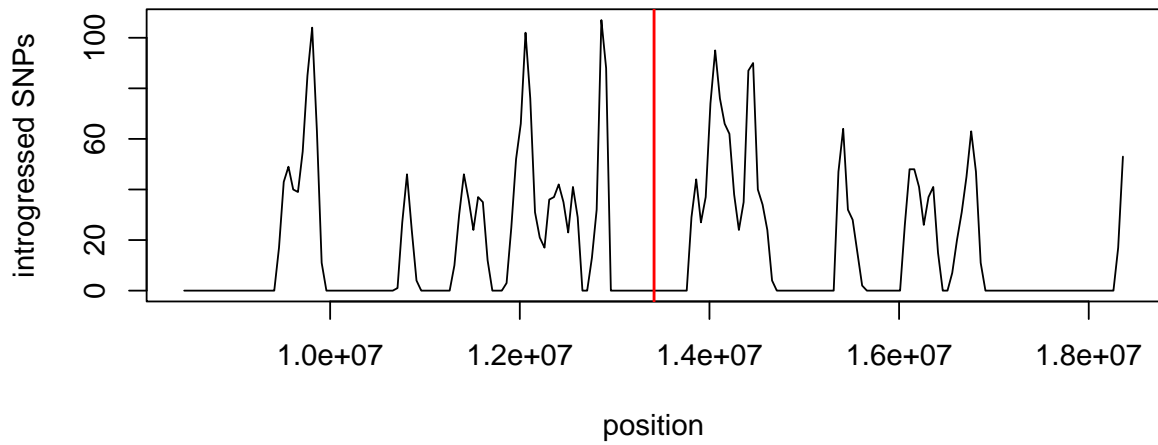

### CEU chr1 PRAMEF5

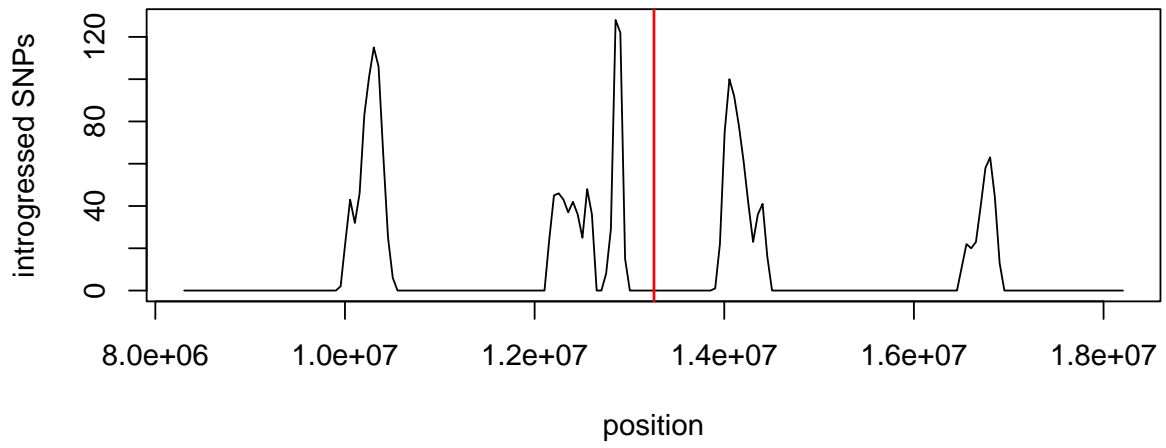

### CHB chr1 PRAMEF5

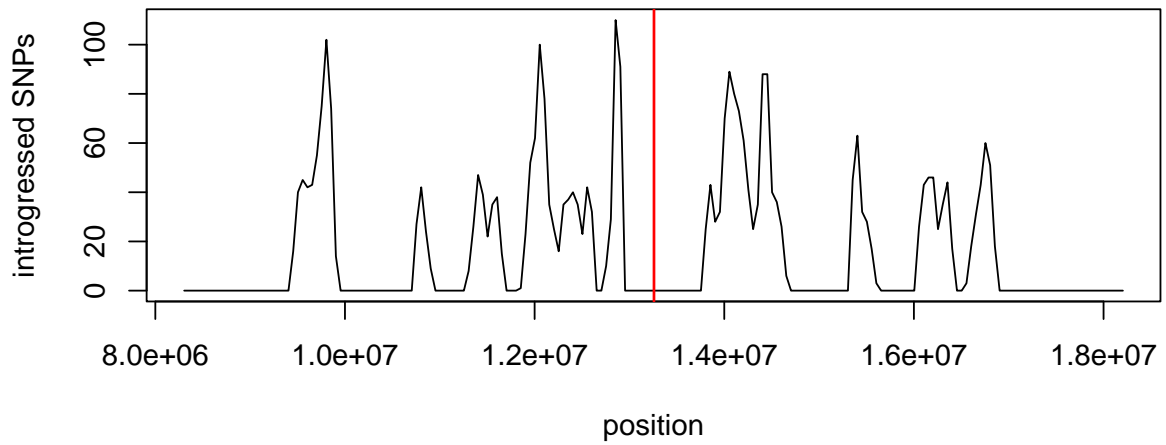

**CEU chr1 PRAMEF8**

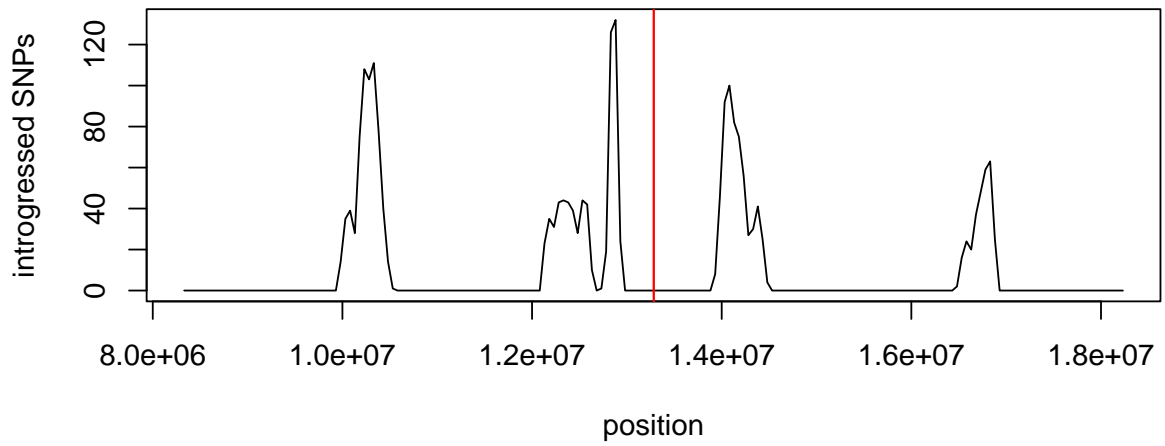

**CHB chr1 PRAMEF8**

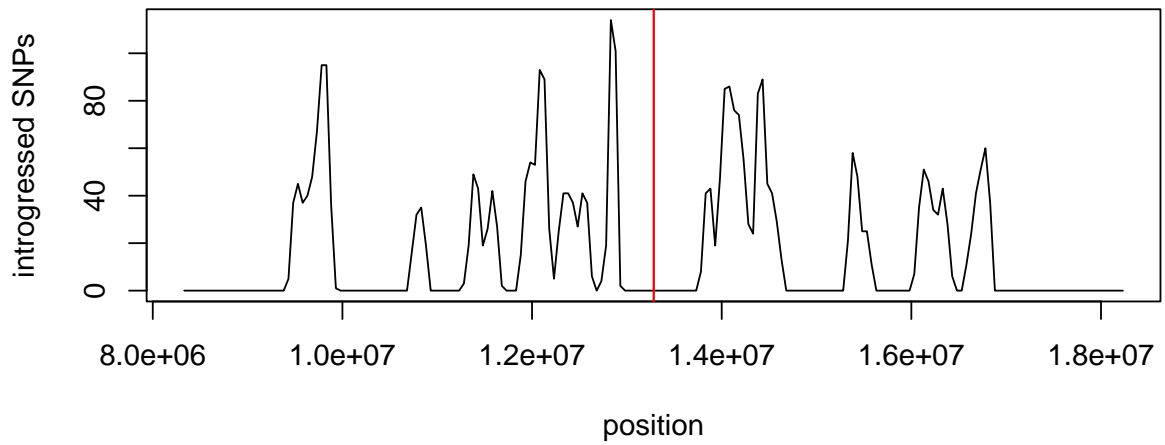

**CEU chr17 PRR11**

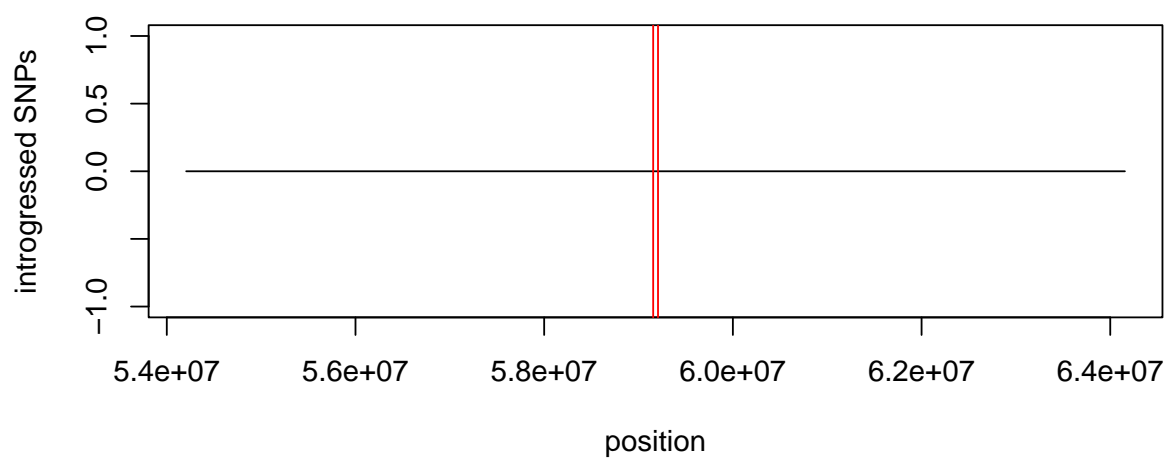

**CHB chr17 PRR11**

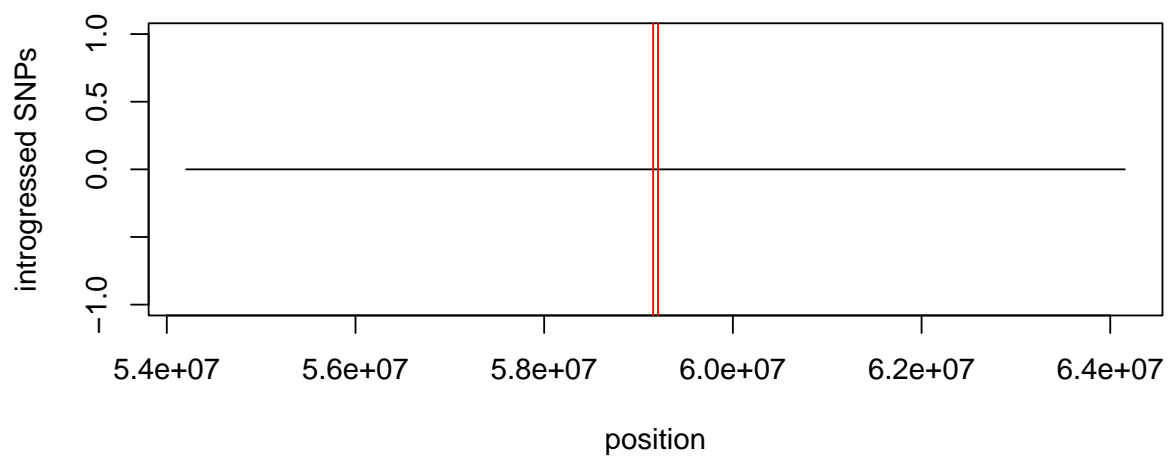



**CEU chr13 PRR20A**

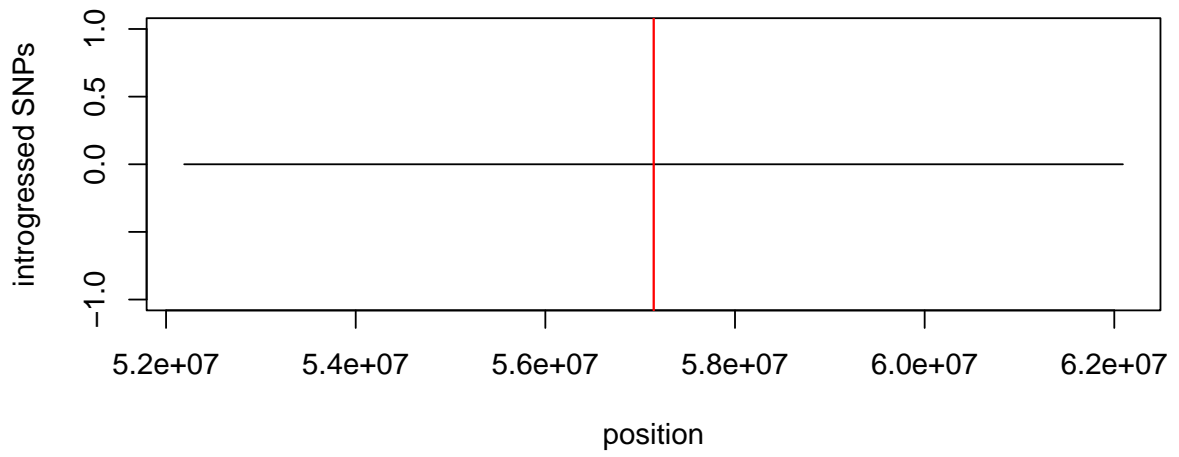

**CHB chr13 PRR20A**

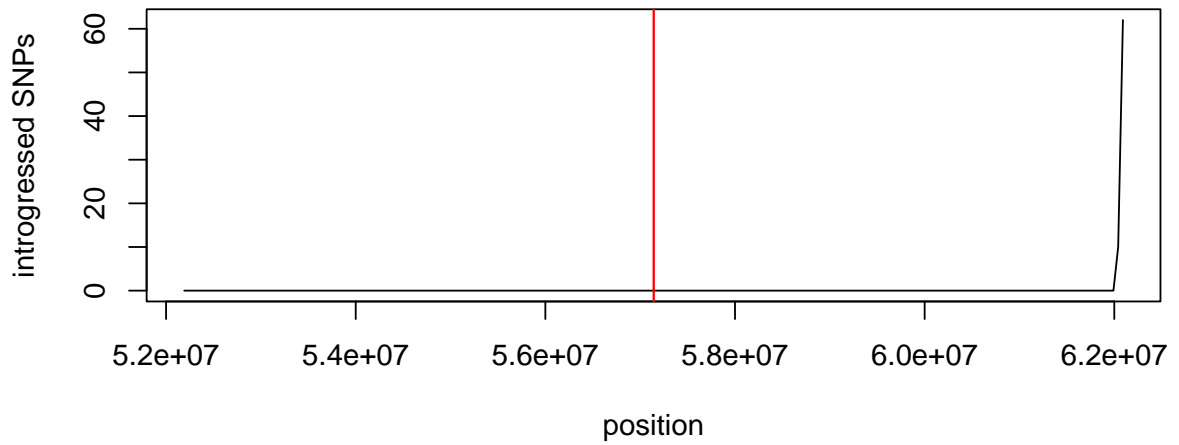

**CEU chr19 PSG3**

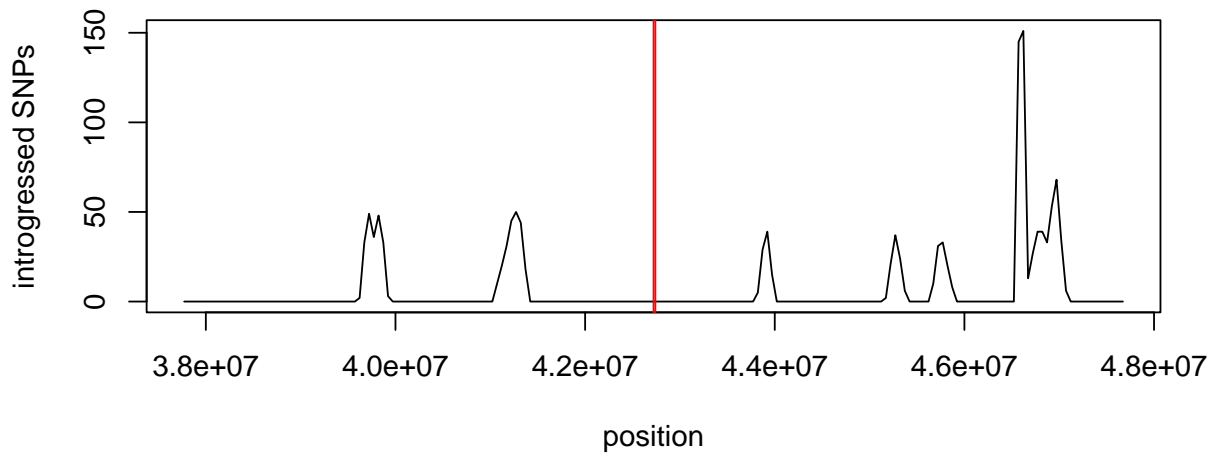

**CHB chr19 PSG3**

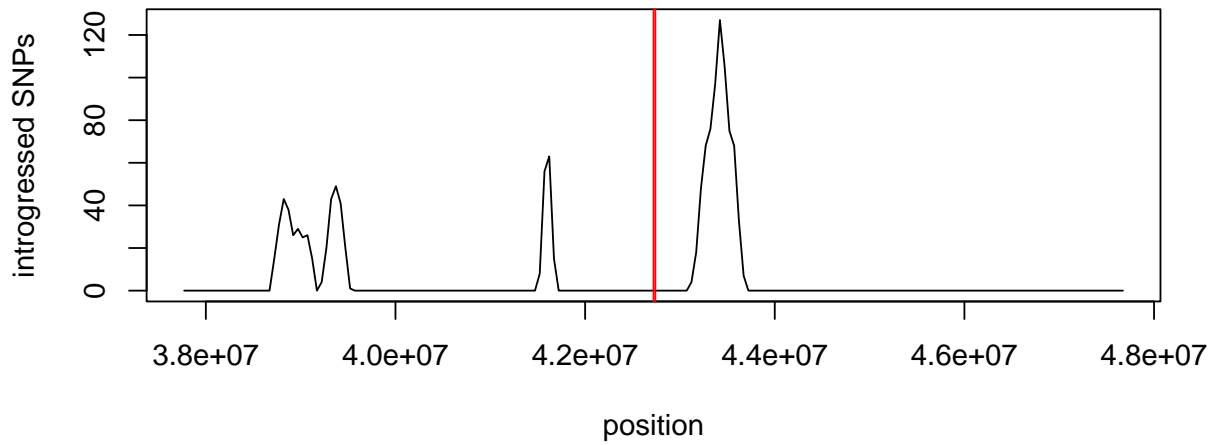

**CEU chr2 RGD1**

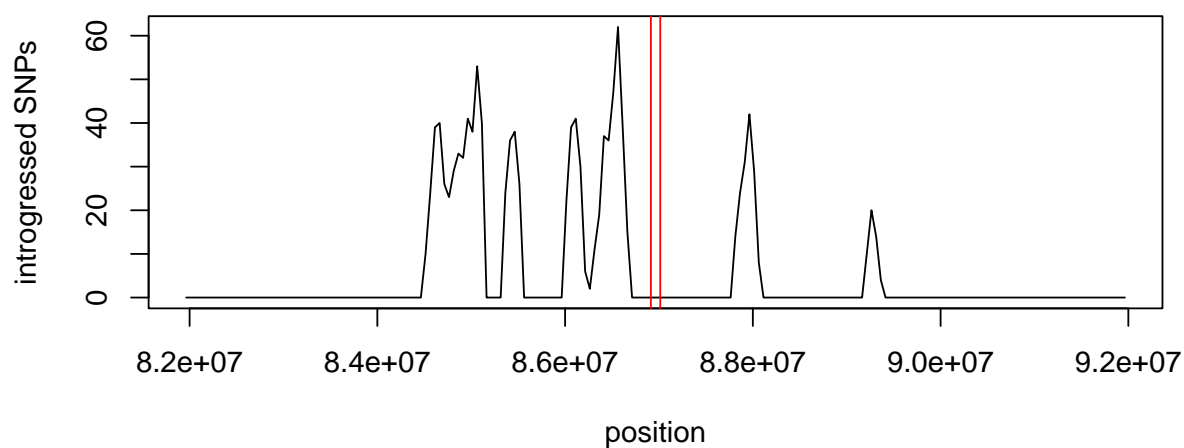

**CHB chr2 RGD1**

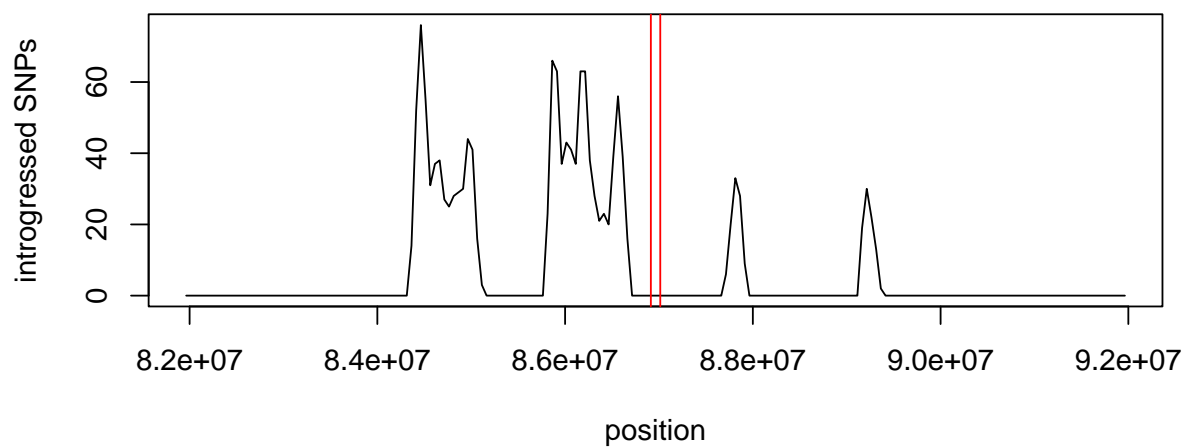

**CEU chr7 SPDYE3**

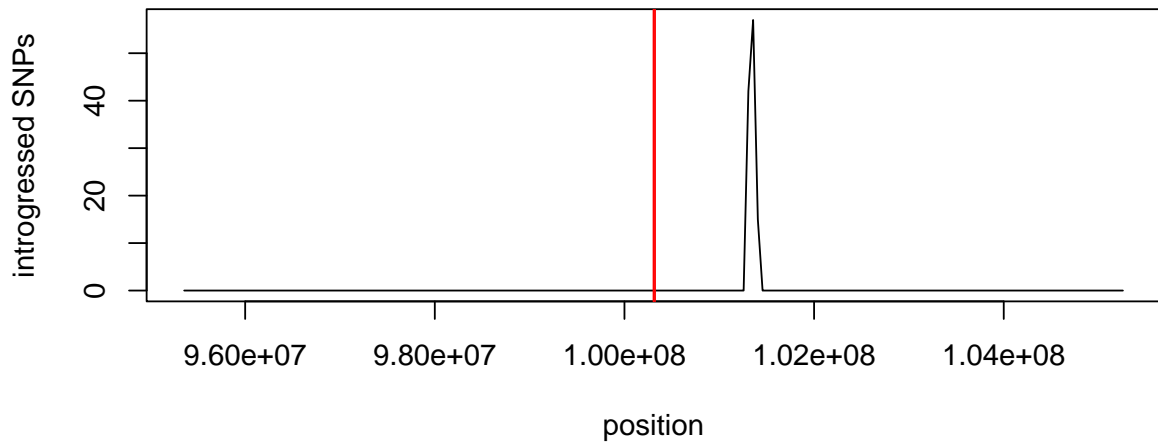

**CHB chr7 SPDYE3**

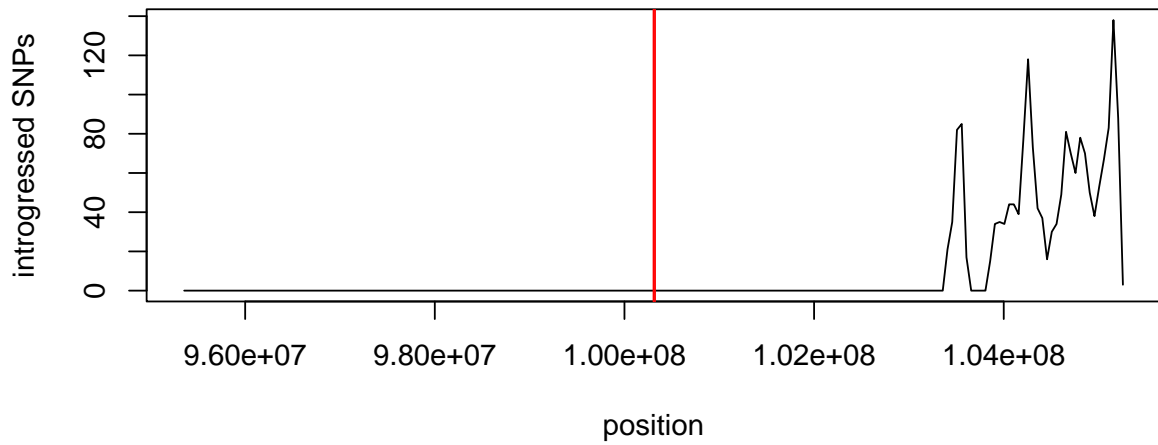

**CEU chr16 SULT1A3**

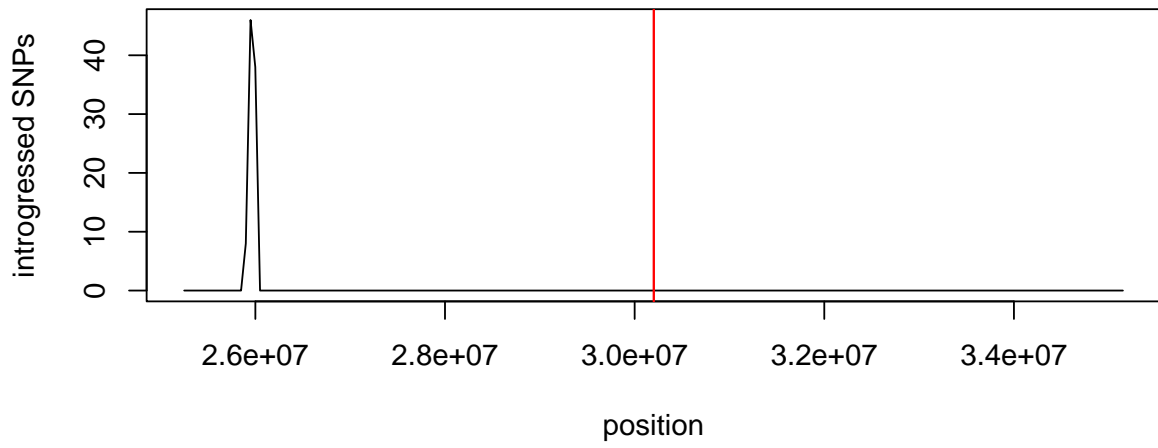

**CHB chr16 SULT1A3**

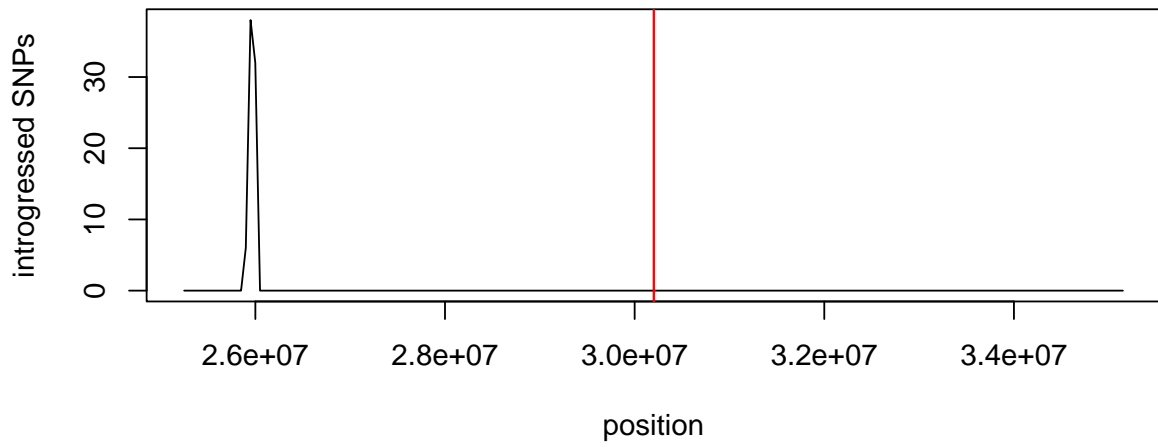

### CEU chr6 TBC1D3

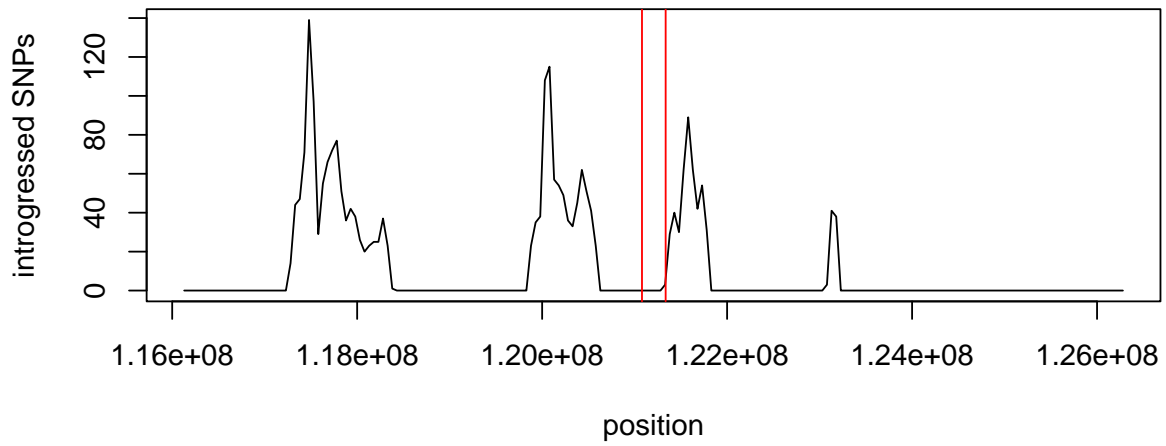

### CHB chr6 TBC1D3

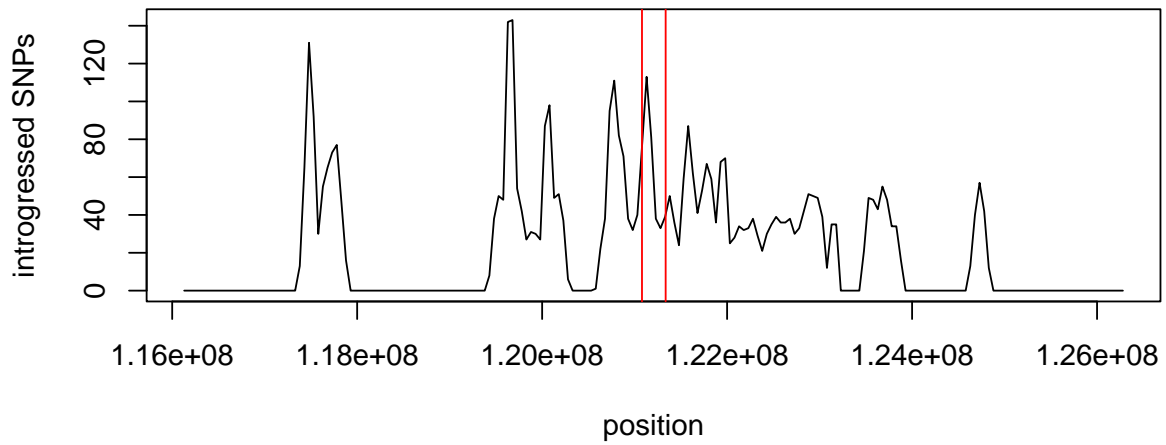

**CEU chr8 TBC1D3**

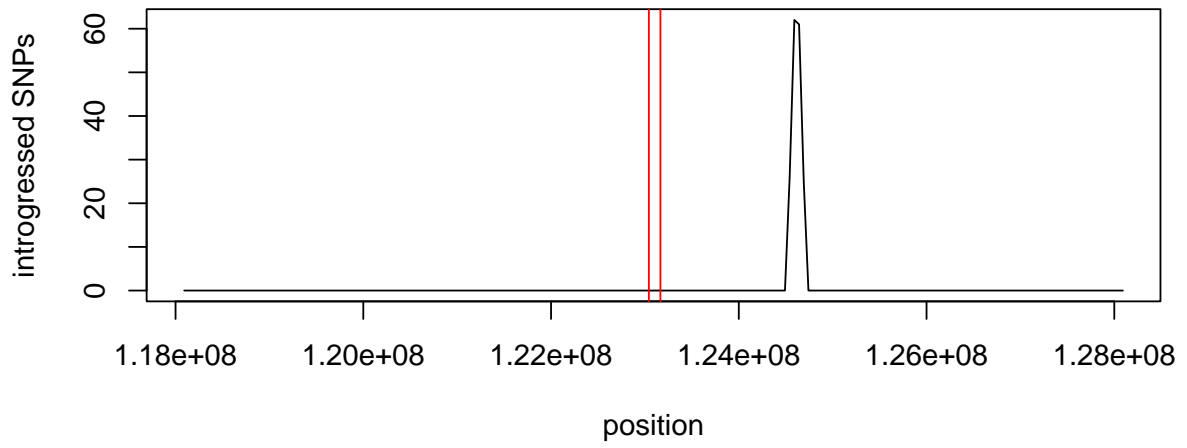

**CHB chr8 TBC1D3**

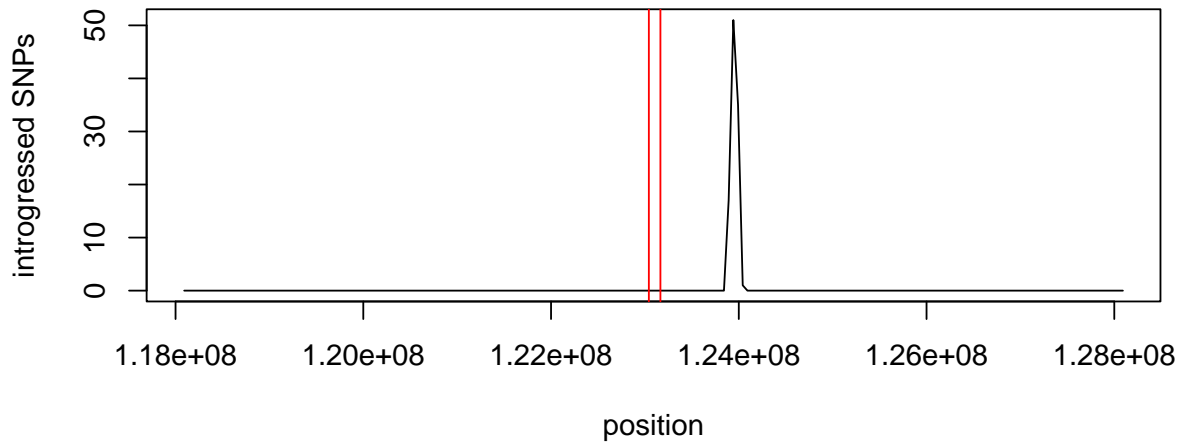

**CEU chr12 TBC1D3**

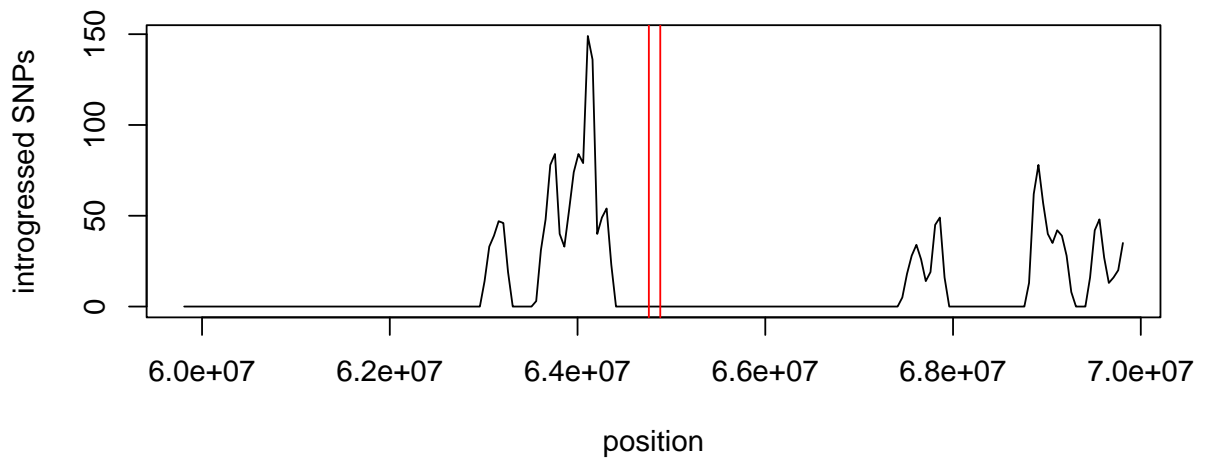

**CHB chr12 TBC1D3**

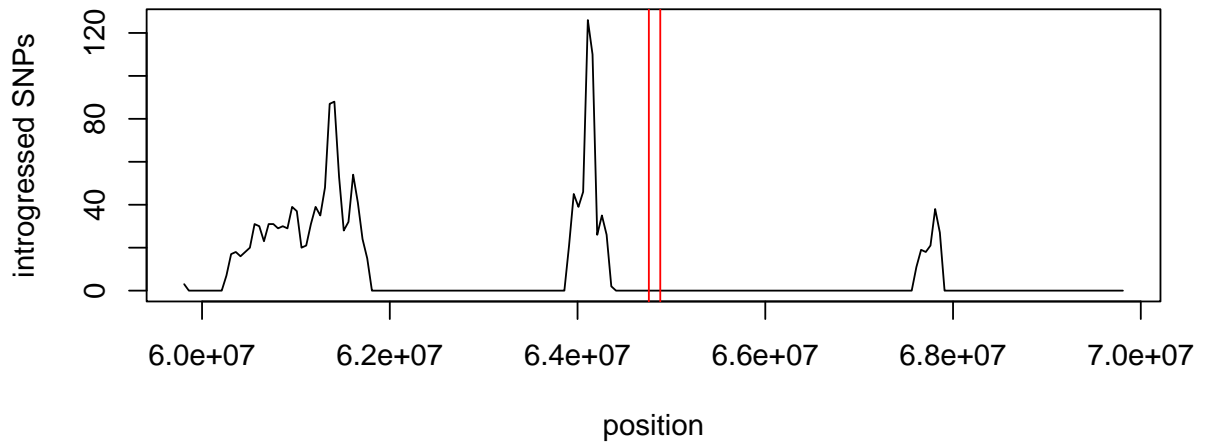



**CEU chr17 TBC1D3**

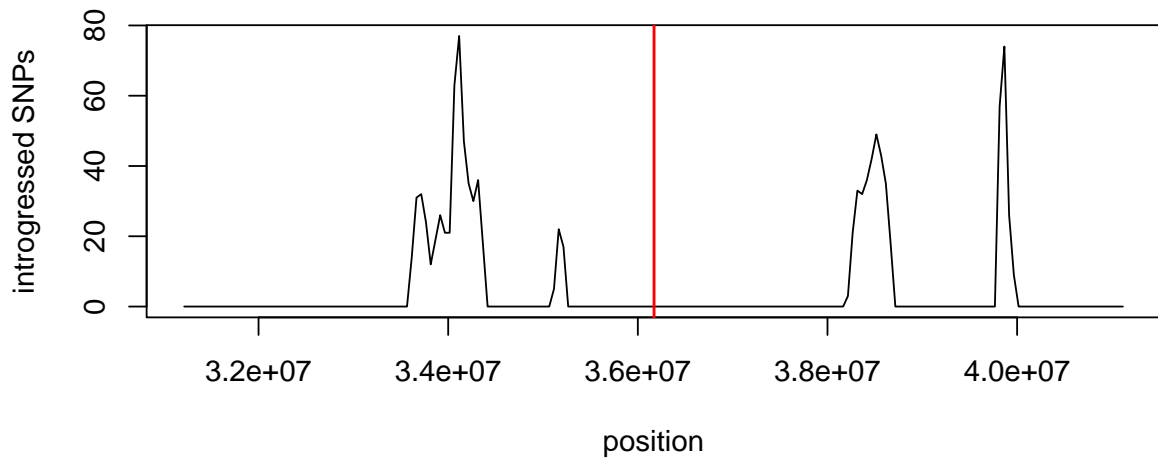

**CHB chr17 TBC1D3**

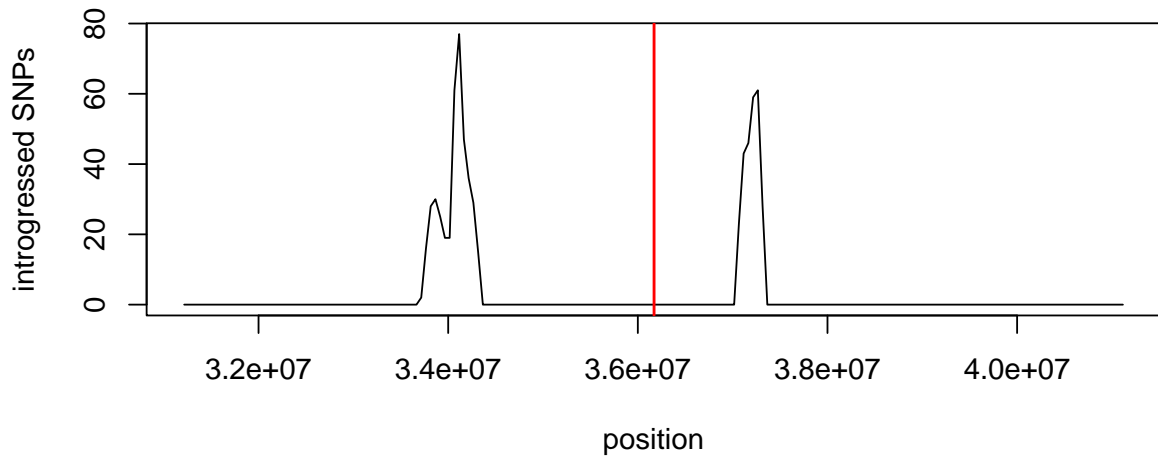

**CEU chr16 TP53TG3**

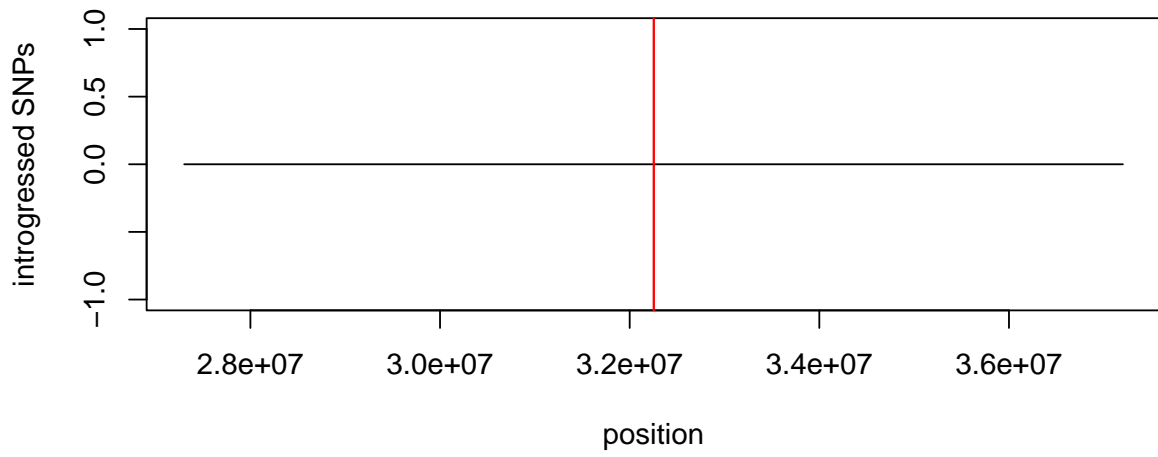

**CHB chr16 TP53TG3**

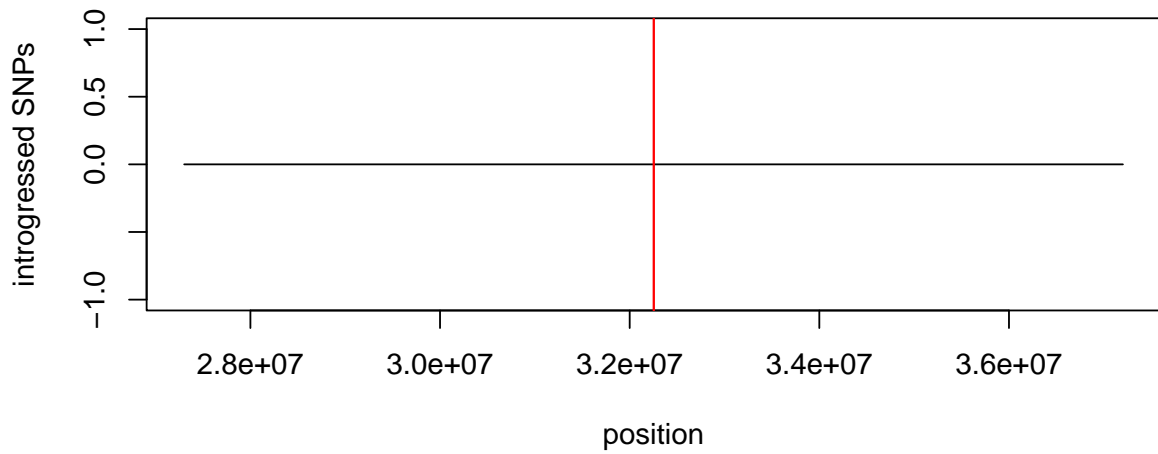

### CEU chr11 TRIM49L1

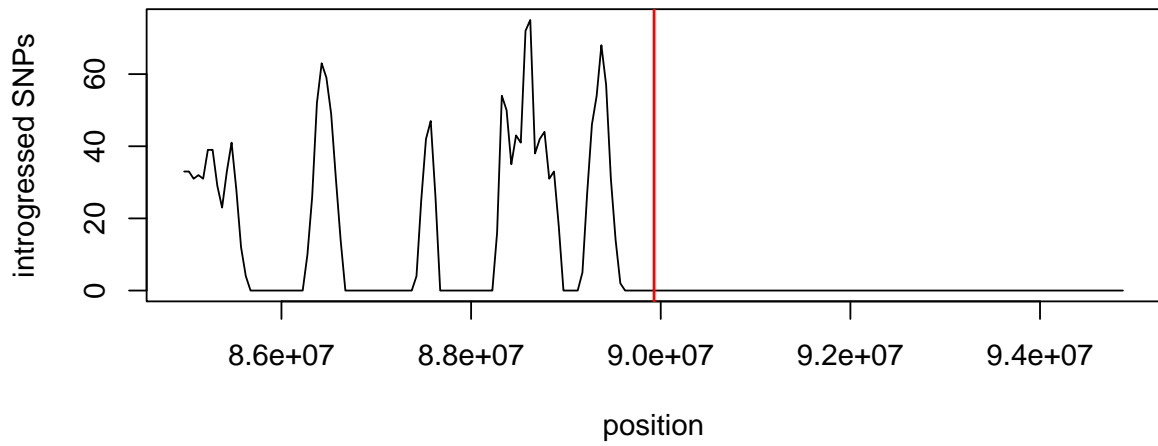

### CHB chr11 TRIM49L1

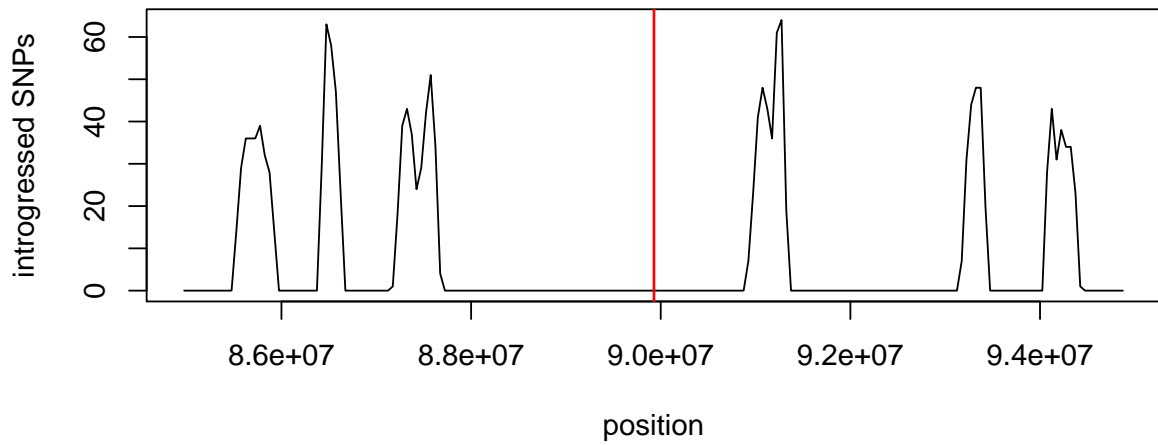

**CEU Cumulative introgressed SNPs**

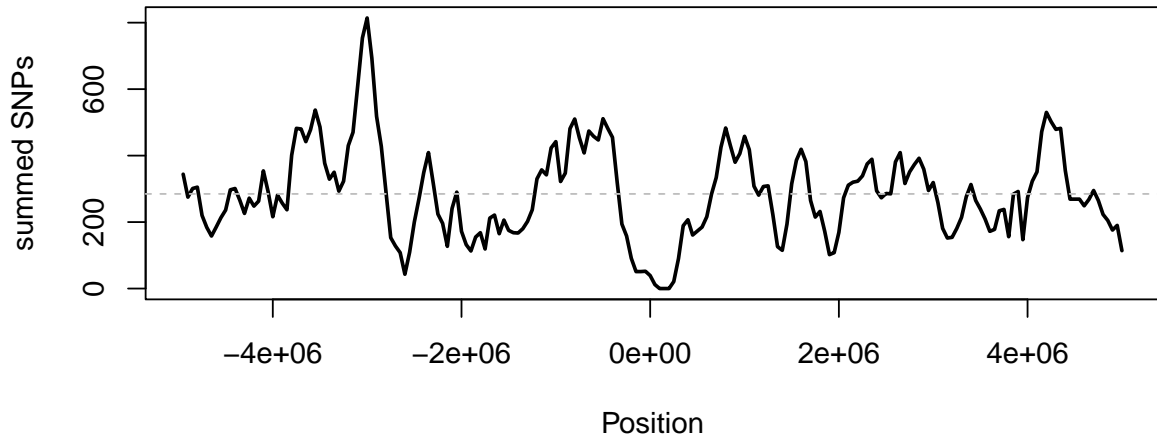

**CHB Cumulative introgressed SNPs**

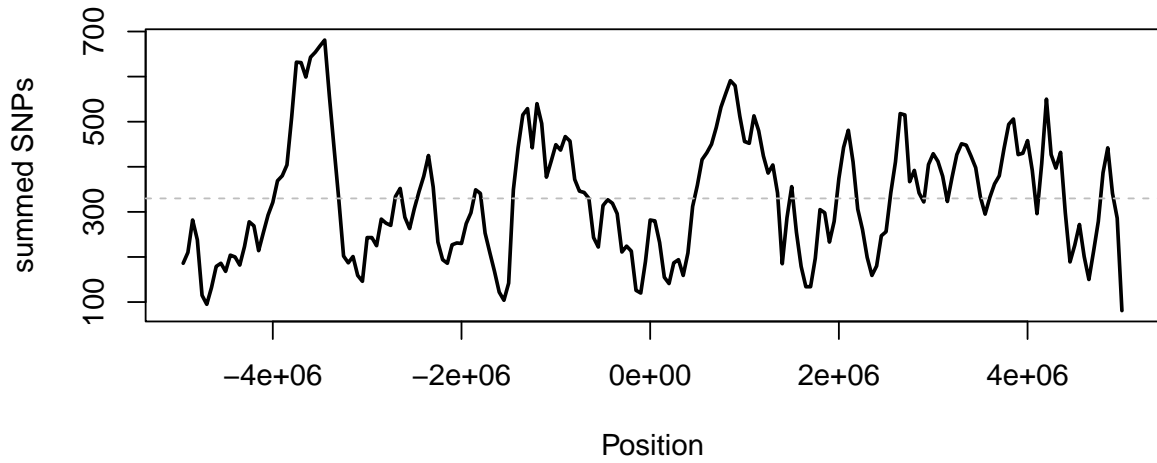

Supplement: 41439_2024_293_MOESM1_ESM.pdf [file 41439_2024_293_MOESM1_ESM.pdf]
