# Supplementary material for: Detecting adaptive changes in gene copy number distribution accompanying the human out-of-Africa expansion
Source: PubMed Central journal article supplement (PMC11420239; doi:10.1038/s41439-024-00293-w), 2024-09-23
Supplement: 41439_2024_293_MOESM2_ESM.pdf [file 41439_2024_293_MOESM2_ESM.pdf]

2\_TajimasD\_data

| POP | GENE  | POS       | theta_PI | theta_W | Tajimas_D |
|-----|-------|-----------|----------|---------|-----------|
| CEU | AMY1A | 103160519 | 5.3368   | 9.7221  | -1.3552   |
| CEU | AMY1A | 103165519 | 6.4319   | 10.916  | -1.2437   |
| CEU | AMY1A | 103170519 | 5.4791   | 11.7688 | -1.6255   |
| CEU | AMY1A | 103175519 | 5.8998   | 11.9394 | -1.5398   |
| CEU | AMY1A | 103180519 | 6.7934   | 14.1567 | -1.5979   |
| CEU | AMY1A | 103185519 | 7.3816   | 13.3039 | -1.3632   |
| CEU | AMY1A | 103190519 | 6.1482   | 9.0398  | -0.956    |
| CEU | AMY1A | 103195519 | 4.2663   | 7.6753  | -1.3103   |
| CEU | AMY1A | 103200519 | 4.3362   | 7.8459  | -1.3222   |
| CEU | AMY1A | 103205519 | 3.6663   | 8.0164  | -1.6067   |
| CEU | AMY1A | 103210519 | 4.208    | 10.0632 | -1.7522   |
| CEU | AMY1A | 103215519 | 7.972    | 11.7688 | -0.9812   |
| CEU | AMY1A | 103220519 | 7.208    | 9.3809  | -0.6942   |
| CEU | AMY1A | 103225519 | 6.1828   | 7.1636  | -0.4015   |
| CEU | AMY1A | 103230519 | 7.665    | 7.3342  | 0.1325    |
| CEU | AMY1A | 103235519 | 9.9311   | 10.0632 | -0.0395   |
| CEU | AMY1A | 103240519 | 10.3455  | 9.7221  | 0.1927    |
| CEU | AMY1A | 103245519 | 9.9046   | 8.5281  | 0.4803    |
| CEU | AMY1A | 103250519 | 11.1721  | 9.0398  | 0.705     |
| CEU | AMY1A | 103255519 | 9.8093   | 8.187   | 0.5877    |
| CEU | AMY1A | 103260519 | 10.0361  | 10.4043 | -0.1068   |
| CEU | AMY1A | 103265519 | 9.3457   | 10.0632 | -0.2147   |
| CEU | AMY1A | 103270519 | 9.1789   | 9.2104  | -0.0102   |
| CEU | AMY1A | 103275519 | 9.0866   | 9.5515  | -0.1461   |
| CEU | AMY1A | 103280519 | 9.3877   | 10.916  | -0.4239   |
| CEU | AMY1A | 103285519 | 9.8158   | 11.5982 | -0.467    |
| CEU | AMY1A | 103290519 | 7.5925   | 9.3809  | -0.5713   |
| CEU | AMY1A | 103295519 | 10.5248  | 10.4043 | 0.035     |
| CEU | AMY1A | 103300519 | 10.1752  | 10.4043 | -0.0665   |
| CEU | AMY1A | 103305519 | 6.6801   | 8.6987  | -0.6916   |
| CEU | AMY1A | 103310519 | 7.597    | 8.3576  | -0.2704   |
| CEU | AMY1A | 103315519 | 8.7326   | 9.8926  | -0.3527   |
| CEU | AMY1A | 103320519 | 9.3731   | 11.9394 | -0.6543   |
| CEU | AMY1A | 103325519 | 11.0973  | 13.3039 | -0.5079   |
| CEU | AMY1A | 103330519 | 10.4391  | 11.9394 | -0.3825   |
| CEU | AMY1A | 103335519 | 6.871    | 8.5281  | -0.5782   |
| CEU | AMY1A | 103340519 | 5.3593   | 6.4814  | -0.5029   |
| CEU | AMY1A | 103345519 | 6.6961   | 6.1402  | 0.2616    |
| CEU | AMY1A | 103350519 | 13.7085  | 9.8926  | 1.1603    |
| CEU | AMY1A | 103355519 | 13.8427  | 12.2805 | 0.3879    |
| CEU | AMY1A | 103360519 | 8.9955   | 12.4511 | -0.8468   |
| CEU | AMY1A | 103365519 | 8.2379   | 10.7454 | -0.7058   |
| CEU | AMY1A | 103370519 | 10.1418  | 12.6216 | -0.6      |
| CEU | AMY1A | 103375519 | 12.1265  | 15.3506 | -0.6478   |
| CEU | AMY1A | 103380519 | 12.9937  | 15.1801 | -0.444    |
| CEU | AMY1A | 103385519 | 11.5982  | 13.8156 | -0.4925   |
| CEU | AMY1A | 103390519 | 9.5329   | 12.9627 | -0.8091   |
| CEU | AMY1A | 103395519 | 11.4471  | 14.3272 | -0.6179   |

## 2\_TajimasD\_data

|     |       |           |         |         |         |
|-----|-------|-----------|---------|---------|---------|
| CEU | AMY1A | 103400519 | 14.7006 | 15.3506 | -0.1306 |
| CEU | AMY1A | 103405519 | 14.3811 | 12.6216 | 0.4257  |
| CEU | AMY1A | 103410519 | 10.0313 | 10.0632 | -0.0095 |
| CEU | AMY1A | 103415519 | 9.0082  | 13.4744 | -1.0157 |
| CEU | AMY1A | 103420519 | 9.3063  | 12.1099 | -0.7053 |
| CEU | AMY1A | 103425519 | 10.0089 | 8.8692  | 0.3835  |
| CEU | AMY1A | 103430519 | 7.6413  | 8.3576  | -0.2546 |
| CEU | AMY1A | 103435519 | 4.4543  | 7.8459  | -1.2777 |
| CEU | AMY1A | 103440519 | 7.032   | 8.6987  | -0.571  |
| CEU | AMY1A | 103445519 | 7.8273  | 8.8692  | -0.3506 |
| CEU | AMY1A | 103450519 | 8.0451  | 9.0398  | -0.3289 |
| CEU | AMY1A | 103455519 | 8.8355  | 10.7454 | -0.5376 |
| CEU | AMY1A | 103460519 | 5.6555  | 10.2337 | -1.3488 |
| CEU | AMY1A | 103465519 | 4.0324  | 9.7221  | -1.7583 |
| CEU | AMY1A | 103470519 | 5.0437  | 9.8926  | -1.4744 |
| CEU | AMY1A | 103475519 | 6.1216  | 10.5749 | -1.2724 |
| CEU | AMY1A | 103480519 | 5.0054  | 9.7221  | -1.4576 |
| CEU | AMY1A | 103485519 | 6.2441  | 12.2805 | -1.4987 |
| CEU | AMY1A | 103490519 | 9.3593  | 16.7151 | -1.3624 |
| CEU | AMY1A | 103495519 | 10.5338 | 16.8857 | -1.1651 |
| CEU | AMY1A | 103500519 | 9.5924  | 16.0329 | -1.2414 |
| CEU | AMY1A | 103505519 | 11.6117 | 16.5446 | -0.9227 |
| CEU | AMY1A | 103510519 | 13.7116 | 16.8857 | -0.5822 |
| CEU | AMY1A | 103515519 | 11.1976 | 14.3272 | -0.6715 |
| CEU | AMY1A | 103520519 | 8.5706  | 11.0866 | -0.6877 |
| CEU | AMY1A | 103525519 | 7.2995  | 9.8926  | -0.7885 |
| CEU | AMY1A | 103530519 | 9.0082  | 12.7922 | -0.9039 |
| CEU | AMY1A | 103535519 | 10.1712 | 13.4744 | -0.7512 |
| CEU | AMY1A | 103540519 | 12.485  | 12.7922 | -0.0734 |
| CEU | AMY1A | 103545519 | 13.2162 | 13.8156 | -0.1331 |
| CEU | AMY1A | 103550519 | 18.4352 | 14.1567 | 0.9285  |
| CEU | AMY1A | 103555519 | 14.4545 | 10.916  | 0.9814  |
| CEU | AMY1A | 103560519 | 3.5772  | 6.1402  | -1.2061 |
| CEU | AMY1A | 103565519 | 5.1123  | 7.6753  | -0.9851 |
| CEU | AMY1A | 103570519 | 5.9988  | 8.8692  | -0.9659 |
| CEU | AMY1A | 103575519 | 6.8297  | 8.0164  | -0.4383 |
| CEU | AMY1A | 103580519 | 7.3673  | 8.6987  | -0.4561 |
| CEU | AMY1A | 103585519 | 9.113   | 10.5749 | -0.4177 |
| CEU | AMY1A | 103590519 | 20.1008 | 13.9861 | 1.3423  |
| CEU | AMY1A | 103595519 | 27.3352 | 17.0562 | 1.8674  |
| CEU | AMY1A | 103600519 | 25.0282 | 18.2502 | 1.154   |
| CEU | AMY1A | 103605519 | 19.6487 | 18.9324 | 0.1177  |
| CEU | AMY1A | 103610519 | 18.4556 | 19.4441 | -0.1583 |
| CEU | AMY1A | 103615519 | 31.4051 | 19.9558 | 1.7887  |
| CEU | AMY1A | 103620519 | 32.578  | 16.8857 | 2.8783  |
| CEU | AMY1A | 103625519 | 20.9408 | 13.1333 | 1.8193  |
| CEU | AMY1A | 103630519 | 16.1927 | 13.8156 | 0.5279  |
| CEU | AMY1A | 103635519 | 16.6739 | 14.1567 | 0.5463  |
| CEU | AMY1A | 103640519 | 15.0155 | 11.7688 | 0.8391  |

## 2\_TajimasD\_data

|     |       |           |         |         |         |
|-----|-------|-----------|---------|---------|---------|
| CEU | AMY1A | 103645519 | 13.3721 | 10.4043 | 0.8609  |
| CEU | AMY1A | 103650519 | 16.5382 | 11.7688 | 1.2326  |
| CEU | AMY1A | 103655519 | 16.9316 | 11.5982 | 1.3974  |
| CEU | AMY1A | 103660519 | 17.7737 | 11.2571 | 1.756   |
| CEU | AMY1A | 103665519 | 18.0837 | 12.4511 | 1.3804  |
| CEU | AMY1A | 103670519 | 16.4684 | 12.6216 | 0.9307  |
| CEU | AMY1A | 103675519 | 12.397  | 9.2104  | 1.0355  |
| CEU | AMY1A | 103680519 | 7.4824  | 6.1402  | 0.6316  |
| CEU | AMY1A | 103685519 | 6.5376  | 6.1402  | 0.187   |
| CEU | AMY1A | 103690519 | 6.8382  | 7.3342  | -0.1987 |
| CEU | AMY1A | 103695519 | 6.3795  | 9.0398  | -0.8796 |
| CEU | AMY1A | 103700519 | 5.8413  | 9.0398  | -1.0575 |
| CEU | AMY1A | 103705519 | 4.2127  | 7.5047  | -1.2916 |
| CEU | AMY1A | 103710519 | 3.1348  | 5.458   | -1.2145 |
| CEU | AMY1A | 103715519 | 3.2381  | 6.4814  | -1.4537 |
| CEU | AMY1A | 103720519 | 3.8466  | 8.5281  | -1.6334 |
| CEU | AMY1A | 103725519 | 5.1938  | 9.2104  | -1.3052 |
| CEU | AMY1A | 103730519 | 6.8666  | 10.5749 | -1.0595 |
| CEU | AMY1A | 103735519 | 7.7054  | 12.4511 | -1.163  |
| CEU | AMY1A | 103740519 | 7.8407  | 11.5982 | -0.9845 |
| CEU | AMY1A | 103745519 | 10.1968 | 12.7922 | -0.62   |
| CEU | AMY1A | 103750519 | 16.2872 | 19.2736 | -0.4825 |
| CEU | AMY1A | 103755519 | 19.3753 | 17.9091 | 0.2542  |
| CEU | AMY1A | 103760519 | 16.918  | 12.7922 | 0.9856  |
| CEU | AMY1A | 103765519 | 12.1177 | 11.9394 | 0.0455  |
| CEU | AMY1A | 103770519 | 10.0202 | 14.6684 | -0.9752 |
| CEU | AMY1A | 103775519 | 9.187   | 20.6381 | -1.732  |
| CEU | AMY1A | 103780519 | 10.2406 | 19.9558 | -1.5178 |
| CEU | AMY1A | 103785519 | 6.5584  | 8.0164  | -0.5385 |
| CEU | AMY1A | 103790519 | 0       | 0       | 0       |
| CEU | AMY1A | 103795519 | 0.1833  | 0.1706  | 0.0754  |
| CEU | AMY1A | 103800519 | 0.1833  | 0.1706  | 0.0754  |
| CEU | AMY1A | 103805519 | 0       | 0       | 0       |
| CEU | AMY1A | 103810519 | 0       | 0       | 0       |
| CEU | AMY1A | 103815519 | 0       | 0       | 0       |
| CEU | AMY1A | 103820519 | 0       | 0       | 0       |
| CEU | AMY1A | 103825519 | 0       | 0       | 0       |
| CEU | AMY1A | 103830519 | 0       | 0       | 0       |
| CEU | AMY1A | 103835519 | 0       | 0       | 0       |
| CEU | AMY1A | 103840519 | 0       | 0       | 0       |
| CEU | AMY1A | 103845519 | 0       | 0       | 0       |
| CEU | AMY1A | 103850519 | 0       | 0       | 0       |
| CEU | AMY1A | 103855519 | 0       | 0       | 0       |
| CEU | AMY1A | 103860519 | 0       | 0       | 0       |
| CEU | AMY1A | 103865519 | 0       | 0       | 0       |
| CEU | AMY1A | 103870519 | 0       | 0       | 0       |
| CEU | AMY1A | 103875519 | 0       | 0       | 0       |
| CEU | AMY1A | 103880519 | 0       | 0       | 0       |
| CEU | AMY1A | 103885519 | 0       | 0       | 0       |

## 2\_TajimasD\_data

|     |       |           |        |        |         |
|-----|-------|-----------|--------|--------|---------|
| CEU | AMY1A | 103890519 | 0      | 0      | 0       |
| CEU | AMY1A | 103895519 | 0      | 0      | 0       |
| CEU | AMY1A | 103900519 | 0      | 0      | 0       |
| CEU | AMY1A | 103905519 | 0      | 0      | 0       |
| CEU | AMY1A | 103910519 | 0.0402 | 0.5117 | -1.4787 |
| CEU | AMY1A | 103915519 | 3.4987 | 3.9229 | -0.2959 |
| CEU | AMY1A | 103920519 | 5.6514 | 7.1636 | -0.619  |
| CEU | AMY1A | 103925519 | 2.1929 | 3.7524 | -1.1298 |
| CEU | AMY1A | 103930519 | 0      | 0      | 0       |
| CEU | AMY1A | 103935519 | 0      | 0      | 0       |
| CEU | AMY1A | 103940519 | 0      | 0      | 0       |
| CEU | AMY1A | 103945519 | 0      | 0      | 0       |
| CEU | AMY1A | 103950519 | 0      | 0      | 0       |
| CEU | AMY1A | 103955519 | 0      | 0      | 0       |
| CEU | AMY1A | 103960519 | 0      | 0      | 0       |
| CEU | AMY1A | 103965519 | 0      | 0      | 0       |
| CEU | AMY1A | 103970519 | 0      | 0      | 0       |
| CEU | AMY1A | 103975519 | 0      | 0      | 0       |
| CEU | AMY1A | 103980519 | 0      | 0      | 0       |
| CEU | AMY1A | 103985519 | 0      | 0      | 0       |
| CEU | AMY1A | 103990519 | 0      | 0      | 0       |
| CEU | AMY1A | 103995519 | 0      | 0      | 0       |
| CEU | AMY1A | 104000519 | 0      | 0      | 0       |
| CEU | AMY1A | 104005519 | 0      | 0      | 0       |
| CEU | AMY1A | 104010519 | 0      | 0      | 0       |
| CEU | AMY1A | 104015519 | 0      | 0      | 0       |
| CEU | AMY1A | 104020519 | 0      | 0      | 0       |
| CEU | AMY1A | 104025519 | 0      | 0      | 0       |
| CEU | AMY1A | 104030519 | 0      | 0      | 0       |
| CEU | AMY1A | 104035519 | 0      | 0      | 0       |
| CEU | AMY1A | 104040519 | 0      | 0      | 0       |
| CEU | AMY1A | 104045519 | 0      | 0      | 0       |
| CEU | AMY1A | 104050519 | 0      | 0      | 0       |
| CEU | AMY1A | 104055519 | 0      | 0      | 0       |
| CEU | AMY1A | 104060519 | 0      | 0      | 0       |
| CEU | AMY1A | 104065519 | 0      | 0      | 0       |
| CEU | AMY1A | 104070519 | 0      | 0      | 0       |
| CEU | AMY1A | 104075519 | 0      | 0      | 0       |
| CEU | AMY1A | 104080519 | 0      | 0      | 0       |
| CEU | AMY1A | 104085519 | 0      | 0      | 0       |
| CEU | AMY1A | 104090519 | 0      | 0      | 0       |
| CEU | AMY1A | 104095519 | 0      | 0      | 0       |
| CEU | AMY1A | 104100519 | 0      | 0      | 0       |
| CEU | AMY1A | 104105519 | 0      | 0      | 0       |
| CEU | AMY1A | 104110519 | 0      | 0      | 0       |
| CEU | AMY1A | 104115519 | 0      | 0      | 0       |
| CEU | AMY1A | 104120519 | 0      | 0      | 0       |
| CEU | AMY1A | 104125519 | 0      | 0      | 0       |
| CEU | AMY1A | 104130519 | 0      | 0      | 0       |

## 2\_TajimasD\_data

|     |       |           |         |         |         |
|-----|-------|-----------|---------|---------|---------|
| CEU | AMY1A | 104135519 | 0       | 0       | 0       |
| CEU | AMY1A | 104140519 | 0       | 0       | 0       |
| CEU | AMY1A | 104145519 | 0       | 0       | 0       |
| CEU | AMY1A | 104150519 | 0       | 0       | 0       |
| CEU | AMY1A | 104155519 | 0       | 0       | 0       |
| CHB | AMY1A | 103160519 | 8.72    | 12.3673 | -0.897  |
| CHB | AMY1A | 103165519 | 9.2071  | 13.3838 | -0.9532 |
| CHB | AMY1A | 103170519 | 7.8728  | 12.1979 | -1.0776 |
| CHB | AMY1A | 103175519 | 7.5248  | 10.1649 | -0.7804 |
| CHB | AMY1A | 103180519 | 8.3739  | 13.892  | -1.2156 |
| CHB | AMY1A | 103185519 | 9.154   | 14.9085 | -1.1854 |
| CHB | AMY1A | 103190519 | 8.5028  | 10.1649 | -0.4913 |
| CHB | AMY1A | 103195519 | 7.2349  | 9.3178  | -0.6676 |
| CHB | AMY1A | 103200519 | 5.6665  | 8.8096  | -1.0612 |
| CHB | AMY1A | 103205519 | 4.1127  | 7.2848  | -1.2751 |
| CHB | AMY1A | 103210519 | 4.6132  | 8.8096  | -1.4168 |
| CHB | AMY1A | 103215519 | 8.739   | 10.8426 | -0.5854 |
| CHB | AMY1A | 103220519 | 7.5684  | 9.3178  | -0.5607 |
| CHB | AMY1A | 103225519 | 5.3375  | 7.9625  | -0.9727 |
| CHB | AMY1A | 103230519 | 5.6472  | 8.1319  | -0.9031 |
| CHB | AMY1A | 103235519 | 8.1593  | 9.6567  | -0.4643 |
| CHB | AMY1A | 103240519 | 9.5283  | 9.3178  | 0.0675  |
| CHB | AMY1A | 103245519 | 8.8209  | 10.3343 | -0.4405 |
| CHB | AMY1A | 103250519 | 9.3958  | 10.8426 | -0.4027 |
| CHB | AMY1A | 103255519 | 7.5753  | 7.2848  | 0.1168  |
| CHB | AMY1A | 103260519 | 7.5538  | 8.6402  | -0.3734 |
| CHB | AMY1A | 103265519 | 8.8224  | 10.3343 | -0.4401 |
| CHB | AMY1A | 103270519 | 9.0923  | 10.8426 | -0.4871 |
| CHB | AMY1A | 103275519 | 7.9143  | 11.012  | -0.8497 |
| CHB | AMY1A | 103280519 | 8.0716  | 10.6731 | -0.7348 |
| CHB | AMY1A | 103285519 | 8.2349  | 10.8426 | -0.7257 |
| CHB | AMY1A | 103290519 | 6.1215  | 10.1649 | -1.1953 |
| CHB | AMY1A | 103295519 | 8.9254  | 12.5367 | -0.8768 |
| CHB | AMY1A | 103300519 | 10.0211 | 13.045  | -0.7071 |
| CHB | AMY1A | 103305519 | 8.0849  | 9.8261  | -0.5312 |
| CHB | AMY1A | 103310519 | 8.6764  | 9.4872  | -0.2556 |
| CHB | AMY1A | 103315519 | 8.1637  | 9.9955  | -0.5501 |
| CHB | AMY1A | 103320519 | 7.6872  | 10.6731 | -0.8433 |
| CHB | AMY1A | 103325519 | 11.5038 | 12.1979 | -0.1729 |
| CHB | AMY1A | 103330519 | 12.2346 | 10.8426 | 0.3874  |
| CHB | AMY1A | 103335519 | 8.3922  | 9.4872  | -0.3452 |
| CHB | AMY1A | 103340519 | 6.4786  | 7.9625  | -0.5499 |
| CHB | AMY1A | 103345519 | 7.2048  | 7.6237  | -0.1615 |
| CHB | AMY1A | 103350519 | 14.2246 | 11.012  | 0.8812  |
| CHB | AMY1A | 103355519 | 14.0887 | 12.7061 | 0.3314  |
| CHB | AMY1A | 103360519 | 8.6771  | 11.5202 | -0.7475 |
| CHB | AMY1A | 103365519 | 6.7531  | 10.3343 | -1.0424 |
| CHB | AMY1A | 103370519 | 6.2671  | 13.2144 | -1.6048 |
| CHB | AMY1A | 103375519 | 6.577   | 15.0779 | -1.7324 |

## 2\_TajimasD\_data

|     |       |           |         |         |         |
|-----|-------|-----------|---------|---------|---------|
| CHB | AMY1A | 103380519 | 6.917   | 16.2638 | -1.772  |
| CHB | AMY1A | 103385519 | 6.4776  | 15.2474 | -1.7683 |
| CHB | AMY1A | 103390519 | 5.4611  | 11.8591 | -1.6369 |
| CHB | AMY1A | 103395519 | 6.3223  | 14.2309 | -1.7028 |
| CHB | AMY1A | 103400519 | 7.7546  | 16.6027 | -1.6447 |
| CHB | AMY1A | 103405519 | 7.8319  | 12.8755 | -1.194  |
| CHB | AMY1A | 103410519 | 5.8677  | 11.6896 | -1.5098 |
| CHB | AMY1A | 103415519 | 4.6427  | 14.0615 | -2.0512 |
| CHB | AMY1A | 103420519 | 4.8985  | 12.3673 | -1.8367 |
| CHB | AMY1A | 103425519 | 5.7852  | 10.3343 | -1.3242 |
| CHB | AMY1A | 103430519 | 4.4711  | 9.8261  | -1.6338 |
| CHB | AMY1A | 103435519 | 2.688   | 8.6402  | -2.046  |
| CHB | AMY1A | 103440519 | 4.1696  | 8.979   | -1.5954 |
| CHB | AMY1A | 103445519 | 5.1173  | 10.8426 | -1.5934 |
| CHB | AMY1A | 103450519 | 4.9863  | 11.012  | -1.6528 |
| CHB | AMY1A | 103455519 | 6.1574  | 12.0285 | -1.4821 |
| CHB | AMY1A | 103460519 | 5.414   | 11.012  | -1.5355 |
| CHB | AMY1A | 103465519 | 3.7988  | 8.4708  | -1.6355 |
| CHB | AMY1A | 103470519 | 4.3857  | 9.4872  | -1.6081 |
| CHB | AMY1A | 103475519 | 4.8736  | 9.9955  | -1.538  |
| CHB | AMY1A | 103480519 | 3.7632  | 8.3013  | -1.6185 |
| CHB | AMY1A | 103485519 | 6.6969  | 13.045  | -1.4844 |
| CHB | AMY1A | 103490519 | 10.1704 | 16.4333 | -1.1756 |
| CHB | AMY1A | 103495519 | 10.5917 | 16.0944 | -1.0537 |
| CHB | AMY1A | 103500519 | 9.8618  | 16.7721 | -1.2721 |
| CHB | AMY1A | 103505519 | 9.3868  | 16.6027 | -1.3413 |
| CHB | AMY1A | 103510519 | 8.1871  | 16.9415 | -1.5961 |
| CHB | AMY1A | 103515519 | 5.569   | 15.7556 | -1.9907 |
| CHB | AMY1A | 103520519 | 4.3267  | 13.5532 | -2.0808 |
| CHB | AMY1A | 103525519 | 5.0296  | 13.3838 | -1.9066 |
| CHB | AMY1A | 103530519 | 6.9339  | 16.6027 | -1.7973 |
| CHB | AMY1A | 103535519 | 7.379   | 16.6027 | -1.7145 |
| CHB | AMY1A | 103540519 | 6.3523  | 14.9085 | -1.7625 |
| CHB | AMY1A | 103545519 | 4.6651  | 13.2144 | -1.9748 |
| CHB | AMY1A | 103550519 | 7.0845  | 14.9085 | -1.6117 |
| CHB | AMY1A | 103555519 | 6.2138  | 13.892  | -1.6915 |
| CHB | AMY1A | 103560519 | 2.2599  | 7.9625  | -2.1132 |
| CHB | AMY1A | 103565519 | 2.8014  | 8.3013  | -1.9615 |
| CHB | AMY1A | 103570519 | 2.9621  | 8.8096  | -1.9743 |
| CHB | AMY1A | 103575519 | 2.455   | 8.3013  | -2.0851 |
| CHB | AMY1A | 103580519 | 2.491   | 10.1649 | -2.2685 |
| CHB | AMY1A | 103585519 | 3.1789  | 11.012  | -2.1485 |
| CHB | AMY1A | 103590519 | 7.0366  | 13.7226 | -1.4902 |
| CHB | AMY1A | 103595519 | 9.7747  | 16.9415 | -1.3067 |
| CHB | AMY1A | 103600519 | 8.6431  | 16.7721 | -1.4964 |
| CHB | AMY1A | 103605519 | 6.0982  | 19.4827 | -2.1339 |
| CHB | AMY1A | 103610519 | 5.127   | 22.7016 | -2.4174 |
| CHB | AMY1A | 103615519 | 10.5846 | 22.871  | -1.6779 |
| CHB | AMY1A | 103620519 | 12.181  | 19.6521 | -1.1812 |

## 2\_TajimasD\_data

|     |       |           |         |         |         |
|-----|-------|-----------|---------|---------|---------|
| CHB | AMY1A | 103625519 | 8.3056  | 15.4168 | -1.4188 |
| CHB | AMY1A | 103630519 | 6.1876  | 13.5532 | -1.6611 |
| CHB | AMY1A | 103635519 | 6.7864  | 13.045  | -1.4635 |
| CHB | AMY1A | 103640519 | 6.5629  | 13.045  | -1.5157 |
| CHB | AMY1A | 103645519 | 5.2671  | 13.5532 | -1.8687 |
| CHB | AMY1A | 103650519 | 6.4849  | 14.0615 | -1.65   |
| CHB | AMY1A | 103655519 | 7.0573  | 13.5532 | -1.465  |
| CHB | AMY1A | 103660519 | 7.5188  | 14.7391 | -1.5036 |
| CHB | AMY1A | 103665519 | 7.1996  | 15.5862 | -1.6559 |
| CHB | AMY1A | 103670519 | 6.2877  | 14.9085 | -1.7758 |
| CHB | AMY1A | 103675519 | 5.059   | 13.3838 | -1.8999 |
| CHB | AMY1A | 103680519 | 3.2817  | 11.3508 | -2.1512 |
| CHB | AMY1A | 103685519 | 2.7944  | 9.9955  | -2.1624 |
| CHB | AMY1A | 103690519 | 3.201   | 10.6731 | -2.1104 |
| CHB | AMY1A | 103695519 | 3.474   | 12.0285 | -2.1596 |
| CHB | AMY1A | 103700519 | 3.2442  | 12.1979 | -2.2307 |
| CHB | AMY1A | 103705519 | 2.2119  | 10.8426 | -2.402  |
| CHB | AMY1A | 103710519 | 1.7173  | 9.1484  | -2.4228 |
| CHB | AMY1A | 103715519 | 1.9181  | 9.1484  | -2.3574 |
| CHB | AMY1A | 103720519 | 1.648   | 10.1649 | -2.5177 |
| CHB | AMY1A | 103725519 | 2.3221  | 10.8426 | -2.3713 |
| CHB | AMY1A | 103730519 | 3.3628  | 12.5367 | -2.2273 |
| CHB | AMY1A | 103735519 | 4.6156  | 14.2309 | -2.0703 |
| CHB | AMY1A | 103740519 | 5.6955  | 13.2144 | -1.7368 |
| CHB | AMY1A | 103745519 | 6.6077  | 13.3838 | -1.5465 |
| CHB | AMY1A | 103750519 | 10.1932 | 17.6192 | -1.304  |
| CHB | AMY1A | 103755519 | 12.4186 | 18.4662 | -1.0151 |
| CHB | AMY1A | 103760519 | 11.6503 | 16.2638 | -0.8746 |
| CHB | AMY1A | 103765519 | 8.6735  | 13.5532 | -1.1005 |
| CHB | AMY1A | 103770519 | 7.0088  | 15.7556 | -1.7093 |
| CHB | AMY1A | 103775519 | 6.316   | 21.8545 | -2.2174 |
| CHB | AMY1A | 103780519 | 5.3823  | 19.6521 | -2.2561 |
| CHB | AMY1A | 103785519 | 3.0407  | 7.9625  | -1.8239 |
| CHB | AMY1A | 103790519 | 0       | 0       | 0       |
| CHB | AMY1A | 103795519 | 0.2128  | 0.3388  | -0.5054 |
| CHB | AMY1A | 103800519 | 0.2128  | 0.3388  | -0.5054 |
| CHB | AMY1A | 103805519 | 0       | 0       | 0       |
| CHB | AMY1A | 103810519 | 0       | 0       | 0       |
| CHB | AMY1A | 103815519 | 0       | 0       | 0       |
| CHB | AMY1A | 103820519 | 0       | 0       | 0       |
| CHB | AMY1A | 103825519 | 0       | 0       | 0       |
| CHB | AMY1A | 103830519 | 0       | 0       | 0       |
| CHB | AMY1A | 103835519 | 0       | 0       | 0       |
| CHB | AMY1A | 103840519 | 0       | 0       | 0       |
| CHB | AMY1A | 103845519 | 0       | 0       | 0       |
| CHB | AMY1A | 103850519 | 0       | 0       | 0       |
| CHB | AMY1A | 103855519 | 0       | 0       | 0       |
| CHB | AMY1A | 103860519 | 0       | 0       | 0       |
| CHB | AMY1A | 103865519 | 0       | 0       | 0       |

## 2\_TajimasD\_data

|     |       |           |        |        |         |
|-----|-------|-----------|--------|--------|---------|
| CHB | AMY1A | 103870519 | 0      | 0      | 0       |
| CHB | AMY1A | 103875519 | 0      | 0      | 0       |
| CHB | AMY1A | 103880519 | 0      | 0      | 0       |
| CHB | AMY1A | 103885519 | 0      | 0      | 0       |
| CHB | AMY1A | 103890519 | 0      | 0      | 0       |
| CHB | AMY1A | 103895519 | 0      | 0      | 0       |
| CHB | AMY1A | 103900519 | 0      | 0      | 0       |
| CHB | AMY1A | 103905519 | 0      | 0      | 0       |
| CHB | AMY1A | 103910519 | 0.048  | 0.3388 | -1.1665 |
| CHB | AMY1A | 103915519 | 3.0489 | 3.8965 | -0.5928 |
| CHB | AMY1A | 103920519 | 4.763  | 6.2684 | -0.6933 |
| CHB | AMY1A | 103925519 | 1.762  | 2.7106 | -0.8989 |
| CHB | AMY1A | 103930519 | 0      | 0      | 0       |
| CHB | AMY1A | 103935519 | 0      | 0      | 0       |
| CHB | AMY1A | 103940519 | 0      | 0      | 0       |
| CHB | AMY1A | 103945519 | 0      | 0      | 0       |
| CHB | AMY1A | 103950519 | 0      | 0      | 0       |
| CHB | AMY1A | 103955519 | 0      | 0      | 0       |
| CHB | AMY1A | 103960519 | 0      | 0      | 0       |
| CHB | AMY1A | 103965519 | 0      | 0      | 0       |
| CHB | AMY1A | 103970519 | 0      | 0      | 0       |
| CHB | AMY1A | 103975519 | 0      | 0      | 0       |
| CHB | AMY1A | 103980519 | 0      | 0      | 0       |
| CHB | AMY1A | 103985519 | 0      | 0      | 0       |
| CHB | AMY1A | 103990519 | 0      | 0      | 0       |
| CHB | AMY1A | 103995519 | 0      | 0      | 0       |
| CHB | AMY1A | 104000519 | 0      | 0      | 0       |
| CHB | AMY1A | 104005519 | 0      | 0      | 0       |
| CHB | AMY1A | 104010519 | 0      | 0      | 0       |
| CHB | AMY1A | 104015519 | 0      | 0      | 0       |
| CHB | AMY1A | 104020519 | 0      | 0      | 0       |
| CHB | AMY1A | 104025519 | 0      | 0      | 0       |
| CHB | AMY1A | 104030519 | 0      | 0      | 0       |
| CHB | AMY1A | 104035519 | 0      | 0      | 0       |
| CHB | AMY1A | 104040519 | 0      | 0      | 0       |
| CHB | AMY1A | 104045519 | 0      | 0      | 0       |
| CHB | AMY1A | 104050519 | 0      | 0      | 0       |
| CHB | AMY1A | 104055519 | 0      | 0      | 0       |
| CHB | AMY1A | 104060519 | 0      | 0      | 0       |
| CHB | AMY1A | 104065519 | 0      | 0      | 0       |
| CHB | AMY1A | 104070519 | 0      | 0      | 0       |
| CHB | AMY1A | 104075519 | 0      | 0      | 0       |
| CHB | AMY1A | 104080519 | 0      | 0      | 0       |
| CHB | AMY1A | 104085519 | 0      | 0      | 0       |
| CHB | AMY1A | 104090519 | 0      | 0      | 0       |
| CHB | AMY1A | 104095519 | 0      | 0      | 0       |
| CHB | AMY1A | 104100519 | 0      | 0      | 0       |
| CHB | AMY1A | 104105519 | 0      | 0      | 0       |
| CHB | AMY1A | 104110519 | 0      | 0      | 0       |



## 2\_TajimasD\_data

|     |       |           |         |         |         |
|-----|-------|-----------|---------|---------|---------|
| CHB | AMY1A | 104115519 | 0       | 0       | 0       |
| CHB | AMY1A | 104120519 | 0       | 0       | 0       |
| CHB | AMY1A | 104125519 | 0       | 0       | 0       |
| CHB | AMY1A | 104130519 | 0       | 0       | 0       |
| CHB | AMY1A | 104135519 | 0       | 0       | 0       |
| CHB | AMY1A | 104140519 | 0       | 0       | 0       |
| CHB | AMY1A | 104145519 | 0       | 0       | 0       |
| CHB | AMY1A | 104150519 | 0       | 0       | 0       |
| CHB | AMY1A | 104155519 | 0       | 0       | 0       |
| YRI | AMY1A | 103160519 | 22.0319 | 26.2177 | -0.4991 |
| YRI | AMY1A | 103165519 | 21.759  | 28.5706 | -0.747  |
| YRI | AMY1A | 103170519 | 19.9013 | 27.5622 | -0.87   |
| YRI | AMY1A | 103175519 | 19.4212 | 26.3858 | -0.8252 |
| YRI | AMY1A | 103180519 | 18.9714 | 27.8983 | -1.0019 |
| YRI | AMY1A | 103185519 | 15.9857 | 23.3606 | -0.9834 |
| YRI | AMY1A | 103190519 | 14.9098 | 18.3188 | -0.5747 |
| YRI | AMY1A | 103195519 | 11.6637 | 16.134  | -0.8511 |
| YRI | AMY1A | 103200519 | 8.1146  | 15.1256 | -1.4197 |
| YRI | AMY1A | 103205519 | 7.9811  | 15.4617 | -1.4833 |
| YRI | AMY1A | 103210519 | 8.7096  | 18.991  | -1.6743 |
| YRI | AMY1A | 103215519 | 11.0738 | 20.1675 | -1.3976 |
| YRI | AMY1A | 103220519 | 10.4641 | 16.9743 | -1.1808 |
| YRI | AMY1A | 103225519 | 9.1141  | 16.4701 | -1.3732 |
| YRI | AMY1A | 103230519 | 11.5351 | 15.7978 | -0.8281 |
| YRI | AMY1A | 103235519 | 13.3987 | 15.4617 | -0.4091 |
| YRI | AMY1A | 103240519 | 13.017  | 17.1423 | -0.7412 |
| YRI | AMY1A | 103245519 | 13.6386 | 19.4952 | -0.93   |
| YRI | AMY1A | 103250519 | 14.0483 | 20.3355 | -0.9586 |
| YRI | AMY1A | 103255519 | 12.4478 | 16.8062 | -0.7981 |
| YRI | AMY1A | 103260519 | 15.3011 | 16.9743 | -0.3035 |
| YRI | AMY1A | 103265519 | 17.8881 | 19.8313 | -0.3035 |
| YRI | AMY1A | 103270519 | 16.2171 | 18.6549 | -0.4039 |
| YRI | AMY1A | 103275519 | 13.4284 | 15.2937 | -0.3737 |
| YRI | AMY1A | 103280519 | 15.1888 | 17.1423 | -0.351  |
| YRI | AMY1A | 103285519 | 16.607  | 19.8313 | -0.5036 |
| YRI | AMY1A | 103290519 | 13.6109 | 17.9827 | -0.7502 |
| YRI | AMY1A | 103295519 | 19.5821 | 22.6884 | -0.4261 |
| YRI | AMY1A | 103300519 | 18.8936 | 21.3439 | -0.3565 |
| YRI | AMY1A | 103305519 | 11.4404 | 17.3104 | -1.0448 |
| YRI | AMY1A | 103310519 | 11.9419 | 18.6549 | -1.1121 |
| YRI | AMY1A | 103315519 | 11.5799 | 17.8146 | -1.0796 |
| YRI | AMY1A | 103320519 | 11.1224 | 18.823  | -1.2648 |
| YRI | AMY1A | 103325519 | 15.6509 | 22.3523 | -0.9326 |
| YRI | AMY1A | 103330519 | 15.9553 | 21.512  | -0.8025 |
| YRI | AMY1A | 103335519 | 11.4879 | 16.9743 | -0.9951 |
| YRI | AMY1A | 103340519 | 8.8023  | 13.9492 | -1.1256 |
| YRI | AMY1A | 103345519 | 10.0032 | 13.9492 | -0.863  |
| YRI | AMY1A | 103350519 | 13.7879 | 16.302  | -0.474  |
| YRI | AMY1A | 103355519 | 15.6049 | 15.4617 | 0.0284  |

## 2\_TajimasD\_data

|     |       |           |         |         |         |
|-----|-------|-----------|---------|---------|---------|
| YRI | AMY1A | 103360519 | 16.187  | 15.2937 | 0.179   |
| YRI | AMY1A | 103365519 | 14.0445 | 14.2853 | -0.0515 |
| YRI | AMY1A | 103370519 | 12.6271 | 15.6298 | -0.5893 |
| YRI | AMY1A | 103375519 | 11.7939 | 18.4868 | -1.1185 |
| YRI | AMY1A | 103380519 | 12.0511 | 18.823  | -1.1123 |
| YRI | AMY1A | 103385519 | 12.5537 | 17.3104 | -0.8467 |
| YRI | AMY1A | 103390519 | 13.6568 | 17.3104 | -0.6503 |
| YRI | AMY1A | 103395519 | 16.5314 | 19.3272 | -0.4477 |
| YRI | AMY1A | 103400519 | 22.1693 | 20.1675 | 0.3077  |
| YRI | AMY1A | 103405519 | 21.2188 | 17.1423 | 0.7324  |
| YRI | AMY1A | 103410519 | 19.6707 | 19.4952 | 0.0279  |
| YRI | AMY1A | 103415519 | 19.6597 | 21.8481 | -0.3113 |
| YRI | AMY1A | 103420519 | 15.1782 | 18.823  | -0.5986 |
| YRI | AMY1A | 103425519 | 13.6723 | 19.4952 | -0.9246 |
| YRI | AMY1A | 103430519 | 10.2326 | 17.9827 | -1.33   |
| YRI | AMY1A | 103435519 | 8.5485  | 17.1423 | -1.544  |
| YRI | AMY1A | 103440519 | 11.7732 | 17.9827 | -1.0656 |
| YRI | AMY1A | 103445519 | 11.9045 | 17.4785 | -0.983  |
| YRI | AMY1A | 103450519 | 12.1323 | 17.1423 | -0.9001 |
| YRI | AMY1A | 103455519 | 14.5709 | 19.4952 | -0.7819 |
| YRI | AMY1A | 103460519 | 12.3999 | 16.6382 | -0.7836 |
| YRI | AMY1A | 103465519 | 9.742   | 14.2853 | -0.9714 |
| YRI | AMY1A | 103470519 | 9.366   | 15.9659 | -1.2692 |
| YRI | AMY1A | 103475519 | 9.2299  | 14.7895 | -1.1501 |
| YRI | AMY1A | 103480519 | 7.9471  | 14.1172 | -1.3341 |
| YRI | AMY1A | 103485519 | 13.6059 | 18.6549 | -0.8365 |
| YRI | AMY1A | 103490519 | 16.931  | 21.0078 | -0.6024 |
| YRI | AMY1A | 103495519 | 17.534  | 21.3439 | -0.5544 |
| YRI | AMY1A | 103500519 | 16.2548 | 21.3439 | -0.7405 |
| YRI | AMY1A | 103505519 | 17.404  | 20.1675 | -0.4247 |
| YRI | AMY1A | 103510519 | 21.5318 | 21.1758 | 0.0522  |
| YRI | AMY1A | 103515519 | 18.6059 | 20.8397 | -0.3326 |
| YRI | AMY1A | 103520519 | 15.0517 | 17.8146 | -0.4784 |
| YRI | AMY1A | 103525519 | 14.2458 | 18.3188 | -0.6867 |
| YRI | AMY1A | 103530519 | 18.0109 | 24.369  | -0.8138 |
| YRI | AMY1A | 103535519 | 17.5628 | 25.0413 | -0.9323 |
| YRI | AMY1A | 103540519 | 16.4056 | 23.0245 | -0.8951 |
| YRI | AMY1A | 103545519 | 15.9226 | 21.68   | -0.8252 |
| YRI | AMY1A | 103550519 | 18.0642 | 23.5287 | -0.7236 |
| YRI | AMY1A | 103555519 | 14.5469 | 21.1758 | -0.972  |
| YRI | AMY1A | 103560519 | 7.5798  | 15.4617 | -1.5629 |
| YRI | AMY1A | 103565519 | 11.2521 | 16.134  | -0.9295 |
| YRI | AMY1A | 103570519 | 11.4965 | 15.7978 | -0.8356 |
| YRI | AMY1A | 103575519 | 11.7091 | 15.1256 | -0.6918 |
| YRI | AMY1A | 103580519 | 13.1659 | 16.8062 | -0.6666 |
| YRI | AMY1A | 103585519 | 12.7031 | 17.9827 | -0.906  |
| YRI | AMY1A | 103590519 | 24.359  | 19.3272 | 0.8057  |
| YRI | AMY1A | 103595519 | 34.2078 | 22.8565 | 1.546   |
| YRI | AMY1A | 103600519 | 32.8547 | 25.3774 | 0.9201  |

## 2\_TajimasD\_data

|     |       |           |         |         |         |
|-----|-------|-----------|---------|---------|---------|
| YRI | AMY1A | 103605519 | 34.1614 | 26.3858 | 0.9213  |
| YRI | AMY1A | 103610519 | 38.5935 | 26.5538 | 1.4178  |
| YRI | AMY1A | 103615519 | 42.86   | 27.058  | 1.8271  |
| YRI | AMY1A | 103620519 | 34.7611 | 24.7051 | 1.2701  |
| YRI | AMY1A | 103625519 | 20.3814 | 20.8397 | -0.0682 |
| YRI | AMY1A | 103630519 | 17.8121 | 19.9994 | -0.3389 |
| YRI | AMY1A | 103635519 | 21.5257 | 17.9827 | 0.608   |
| YRI | AMY1A | 103640519 | 19.2593 | 17.4785 | 0.3141  |
| YRI | AMY1A | 103645519 | 19.0688 | 18.6549 | 0.0686  |
| YRI | AMY1A | 103650519 | 21.9121 | 18.823  | 0.5074  |
| YRI | AMY1A | 103655519 | 19.4406 | 17.8146 | 0.2816  |
| YRI | AMY1A | 103660519 | 20.0986 | 17.4785 | 0.4621  |
| YRI | AMY1A | 103665519 | 23.1772 | 21.3439 | 0.2668  |
| YRI | AMY1A | 103670519 | 20.8294 | 21.0078 | -0.0264 |
| YRI | AMY1A | 103675519 | 14.5023 | 14.9575 | -0.0932 |
| YRI | AMY1A | 103680519 | 10.5188 | 13.1089 | -0.6008 |
| YRI | AMY1A | 103685519 | 10.2142 | 15.4617 | -1.0405 |
| YRI | AMY1A | 103690519 | 12.287  | 19.1591 | -1.1097 |
| YRI | AMY1A | 103695519 | 15.2115 | 22.1842 | -0.9775 |
| YRI | AMY1A | 103700519 | 14.196  | 21.512  | -1.0565 |
| YRI | AMY1A | 103705519 | 10.6927 | 19.3272 | -1.3826 |
| YRI | AMY1A | 103710519 | 9.7532  | 16.8062 | -1.2915 |
| YRI | AMY1A | 103715519 | 8.7605  | 14.2853 | -1.1813 |
| YRI | AMY1A | 103720519 | 8.8724  | 14.9575 | -1.2454 |
| YRI | AMY1A | 103725519 | 12.2432 | 18.4868 | -1.0434 |
| YRI | AMY1A | 103730519 | 15.7306 | 19.6633 | -0.6193 |
| YRI | AMY1A | 103735519 | 16.1359 | 18.1507 | -0.3427 |
| YRI | AMY1A | 103740519 | 15.988  | 17.1423 | -0.2074 |
| YRI | AMY1A | 103745519 | 19.9243 | 18.991  | 0.152   |
| YRI | AMY1A | 103750519 | 30.349  | 24.5371 | 0.739   |
| YRI | AMY1A | 103755519 | 28.9091 | 25.5455 | 0.4113  |
| YRI | AMY1A | 103760519 | 17.9884 | 22.0162 | -0.5688 |
| YRI | AMY1A | 103765519 | 11.9966 | 17.3104 | -0.9458 |
| YRI | AMY1A | 103770519 | 10.9899 | 18.4868 | -1.2528 |
| YRI | AMY1A | 103775519 | 13.0207 | 24.7051 | -1.4758 |
| YRI | AMY1A | 103780519 | 13.1616 | 22.3523 | -1.279  |
| YRI | AMY1A | 103785519 | 6.8118  | 9.0754  | -0.741  |
| YRI | AMY1A | 103790519 | 0       | 0       | 0       |
| YRI | AMY1A | 103795519 | 0.4945  | 0.1681  | 1.9404  |
| YRI | AMY1A | 103800519 | 0.4945  | 0.1681  | 1.9404  |
| YRI | AMY1A | 103805519 | 0       | 0       | 0       |
| YRI | AMY1A | 103810519 | 0       | 0       | 0       |
| YRI | AMY1A | 103815519 | 0       | 0       | 0       |
| YRI | AMY1A | 103820519 | 0       | 0       | 0       |
| YRI | AMY1A | 103825519 | 0       | 0       | 0       |
| YRI | AMY1A | 103830519 | 0       | 0       | 0       |
| YRI | AMY1A | 103835519 | 0       | 0       | 0       |
| YRI | AMY1A | 103840519 | 0       | 0       | 0       |
| YRI | AMY1A | 103845519 | 0       | 0       | 0       |

## 2\_TajimasD\_data

|     |       |           |        |         |         |
|-----|-------|-----------|--------|---------|---------|
| YRI | AMY1A | 103850519 | 0      | 0       | 0       |
| YRI | AMY1A | 103855519 | 0      | 0       | 0       |
| YRI | AMY1A | 103860519 | 0      | 0       | 0       |
| YRI | AMY1A | 103865519 | 0      | 0       | 0       |
| YRI | AMY1A | 103870519 | 0      | 0       | 0       |
| YRI | AMY1A | 103875519 | 0      | 0       | 0       |
| YRI | AMY1A | 103880519 | 0      | 0       | 0       |
| YRI | AMY1A | 103885519 | 0      | 0       | 0       |
| YRI | AMY1A | 103890519 | 0      | 0       | 0       |
| YRI | AMY1A | 103895519 | 0      | 0       | 0       |
| YRI | AMY1A | 103900519 | 0      | 0       | 0       |
| YRI | AMY1A | 103905519 | 0      | 0       | 0       |
| YRI | AMY1A | 103910519 | 0.3281 | 0.6722  | -0.9008 |
| YRI | AMY1A | 103915519 | 2.8615 | 5.5461  | -1.3748 |
| YRI | AMY1A | 103920519 | 4.7981 | 10.4199 | -1.6183 |
| YRI | AMY1A | 103925519 | 2.2648 | 5.5461  | -1.6803 |
| YRI | AMY1A | 103930519 | 0      | 0       | 0       |
| YRI | AMY1A | 103935519 | 0      | 0       | 0       |
| YRI | AMY1A | 103940519 | 0      | 0       | 0       |
| YRI | AMY1A | 103945519 | 0      | 0       | 0       |
| YRI | AMY1A | 103950519 | 0      | 0       | 0       |
| YRI | AMY1A | 103955519 | 0      | 0       | 0       |
| YRI | AMY1A | 103960519 | 0      | 0       | 0       |
| YRI | AMY1A | 103965519 | 0      | 0       | 0       |
| YRI | AMY1A | 103970519 | 0      | 0       | 0       |
| YRI | AMY1A | 103975519 | 0      | 0       | 0       |
| YRI | AMY1A | 103980519 | 0      | 0       | 0       |
| YRI | AMY1A | 103985519 | 0      | 0       | 0       |
| YRI | AMY1A | 103990519 | 0      | 0       | 0       |
| YRI | AMY1A | 103995519 | 0      | 0       | 0       |
| YRI | AMY1A | 104000519 | 0      | 0       | 0       |
| YRI | AMY1A | 104005519 | 0      | 0       | 0       |
| YRI | AMY1A | 104010519 | 0      | 0       | 0       |
| YRI | AMY1A | 104015519 | 0      | 0       | 0       |
| YRI | AMY1A | 104020519 | 0      | 0       | 0       |
| YRI | AMY1A | 104025519 | 0      | 0       | 0       |
| YRI | AMY1A | 104030519 | 0      | 0       | 0       |
| YRI | AMY1A | 104035519 | 0      | 0       | 0       |
| YRI | AMY1A | 104040519 | 0      | 0       | 0       |
| YRI | AMY1A | 104045519 | 0      | 0       | 0       |
| YRI | AMY1A | 104050519 | 0      | 0       | 0       |
| YRI | AMY1A | 104055519 | 0      | 0       | 0       |
| YRI | AMY1A | 104060519 | 0      | 0       | 0       |
| YRI | AMY1A | 104065519 | 0      | 0       | 0       |
| YRI | AMY1A | 104070519 | 0      | 0       | 0       |
| YRI | AMY1A | 104075519 | 0      | 0       | 0       |
| YRI | AMY1A | 104080519 | 0      | 0       | 0       |
| YRI | AMY1A | 104085519 | 0      | 0       | 0       |
| YRI | AMY1A | 104090519 | 0      | 0       | 0       |

## 2\_TajimasD\_data

|     |        |           |         |         |         |
|-----|--------|-----------|---------|---------|---------|
| YRI | AMY1A  | 104095519 | 0       | 0       | 0       |
| YRI | AMY1A  | 104100519 | 0       | 0       | 0       |
| YRI | AMY1A  | 104105519 | 0       | 0       | 0       |
| YRI | AMY1A  | 104110519 | 0       | 0       | 0       |
| YRI | AMY1A  | 104115519 | 0       | 0       | 0       |
| YRI | AMY1A  | 104120519 | 0       | 0       | 0       |
| YRI | AMY1A  | 104125519 | 0       | 0       | 0       |
| YRI | AMY1A  | 104130519 | 0       | 0       | 0       |
| YRI | AMY1A  | 104135519 | 0       | 0       | 0       |
| YRI | AMY1A  | 104140519 | 0       | 0       | 0       |
| YRI | AMY1A  | 104145519 | 0       | 0       | 0       |
| YRI | AMY1A  | 104150519 | 0       | 0       | 0       |
| YRI | AMY1A  | 104155519 | 0       | 0       | 0       |
| CEU | BOLA2B | 28958588  | 5.1     | 7.1636  | -0.8447 |
| CEU | BOLA2B | 28963588  | 3.5677  | 6.1402  | -1.2105 |
| CEU | BOLA2B | 28968588  | 3.8477  | 5.1169  | -0.7025 |
| CEU | BOLA2B | 28973588  | 4.6588  | 5.2874  | -0.338  |
| CEU | BOLA2B | 28978588  | 5.8248  | 6.6519  | -0.3621 |
| CEU | BOLA2B | 28983588  | 6.0546  | 7.6753  | -0.623  |
| CEU | BOLA2B | 28988588  | 5.0515  | 6.3108  | -0.5782 |
| CEU | BOLA2B | 28993588  | 4.8291  | 5.9697  | -0.5505 |
| CEU | BOLA2B | 28998588  | 4.0682  | 6.4814  | -1.0816 |
| CEU | BOLA2B | 29003588  | 4.9847  | 8.0164  | -1.1198 |
| CEU | BOLA2B | 29008588  | 6.657   | 9.7221  | -0.9472 |
| CEU | BOLA2B | 29013588  | 6.2764  | 7.6753  | -0.5377 |
| CEU | BOLA2B | 29018588  | 6.1029  | 6.3108  | -0.0955 |
| CEU | BOLA2B | 29023588  | 5.6799  | 7.1636  | -0.6074 |
| CEU | BOLA2B | 29028588  | 5.3676  | 6.6519  | -0.5623 |
| CEU | BOLA2B | 29033588  | 5.6974  | 7.1636  | -0.6002 |
| CEU | BOLA2B | 29038588  | 4.9204  | 6.9931  | -0.8673 |
| CEU | BOLA2B | 29043588  | 5.0324  | 5.2874  | -0.1371 |
| CEU | BOLA2B | 29048588  | 2.6819  | 2.729   | -0.0445 |
| CEU | BOLA2B | 29053588  | 1.4886  | 2.0467  | -0.6641 |
| CEU | BOLA2B | 29058588  | 4.4125  | 4.0935  | 0.2145  |
| CEU | BOLA2B | 29063588  | 5.4372  | 4.6052  | 0.5051  |
| CEU | BOLA2B | 29068588  | 3.9961  | 3.7524  | 0.1766  |
| CEU | BOLA2B | 29073588  | 3.5865  | 2.729   | 0.8105  |
| CEU | BOLA2B | 29078588  | 4.9819  | 4.4346  | 0.3434  |
| CEU | BOLA2B | 29083588  | 5.5945  | 5.7991  | -0.1013 |
| CEU | BOLA2B | 29088588  | 6.37    | 5.7991  | 0.2828  |
| CEU | BOLA2B | 29093588  | 7.7555  | 7.1636  | 0.2423  |
| CEU | BOLA2B | 29098588  | 7.5582  | 7.5047  | 0.021   |
| CEU | BOLA2B | 29103588  | 7.2375  | 7.6753  | -0.1683 |
| CEU | BOLA2B | 29108588  | 8.6479  | 7.8459  | 0.3021  |
| CEU | BOLA2B | 29113588  | 12.2356 | 8.187   | 1.4667  |
| CEU | BOLA2B | 29118588  | 13.0272 | 10.0632 | 0.887   |
| CEU | BOLA2B | 29123588  | 11.5088 | 9.7221  | 0.5521  |
| CEU | BOLA2B | 29128588  | 17.517  | 11.0866 | 1.7577  |
| CEU | BOLA2B | 29133588  | 21.4607 | 12.7922 | 2.0708  |

## 2\_TajimasD\_data

|     |        |          |         |         |         |
|-----|--------|----------|---------|---------|---------|
| CEU | BOLA2B | 29138588 | 22.5897 | 13.4744 | 2.073   |
| CEU | BOLA2B | 29143588 | 18.488  | 11.7688 | 1.7365  |
| CEU | BOLA2B | 29148588 | 19.7491 | 14.3272 | 1.1633  |
| CEU | BOLA2B | 29153588 | 26.4475 | 16.7151 | 1.8026  |
| CEU | BOLA2B | 29158588 | 22.6479 | 12.6216 | 2.4257  |
| CEU | BOLA2B | 29163588 | 17.1286 | 12.1099 | 1.2626  |
| CEU | BOLA2B | 29168588 | 10.3531 | 10.2337 | 0.0352  |
| CEU | BOLA2B | 29173588 | 5.5914  | 7.5047  | -0.7507 |
| CEU | BOLA2B | 29178588 | 7.1777  | 7.5047  | -0.1283 |
| CEU | BOLA2B | 29183588 | 11.9642 | 8.3576  | 1.282   |
| CEU | BOLA2B | 29188588 | 21.3215 | 12.2805 | 2.2447  |
| CEU | BOLA2B | 29193588 | 18.7714 | 12.2805 | 1.6115  |
| CEU | BOLA2B | 29198588 | 9.1796  | 8.3576  | 0.2922  |
| CEU | BOLA2B | 29203588 | 10.6881 | 10.0632 | 0.187   |
| CEU | BOLA2B | 29208588 | 11.188  | 11.4277 | -0.0637 |
| CEU | BOLA2B | 29213588 | 11.8738 | 9.5515  | 0.7296  |
| CEU | BOLA2B | 29218588 | 10.0486 | 8.187   | 0.6744  |
| CEU | BOLA2B | 29223588 | 8.4972  | 7.3342  | 0.466   |
| CEU | BOLA2B | 29228588 | 12.9885 | 8.6987  | 1.4697  |
| CEU | BOLA2B | 29233588 | 15.7827 | 13.1333 | 0.6173  |
| CEU | BOLA2B | 29238588 | 16.2004 | 13.4744 | 0.62    |
| CEU | BOLA2B | 29243588 | 17.6704 | 12.6216 | 1.2215  |
| CEU | BOLA2B | 29248588 | 15.3148 | 11.2571 | 1.0934  |
| CEU | BOLA2B | 29253588 | 12.847  | 9.7221  | 0.9657  |
| CEU | BOLA2B | 29258588 | 15.5949 | 11.7688 | 0.9888  |
| CEU | BOLA2B | 29263588 | 22.3585 | 16.2034 | 1.1744  |
| CEU | BOLA2B | 29268588 | 26.8916 | 17.0562 | 1.7868  |
| CEU | BOLA2B | 29273588 | 34.733  | 16.8857 | 3.2736  |
| CEU | BOLA2B | 29278588 | 43.6731 | 18.9324 | 4.0662  |
| CEU | BOLA2B | 29283588 | 39.3886 | 17.7385 | 3.788   |
| CEU | BOLA2B | 29288588 | 26.6747 | 12.7922 | 3.3164  |
| CEU | BOLA2B | 29293588 | 19.8089 | 11.0866 | 2.3842  |
| CEU | BOLA2B | 29298588 | 21.1381 | 13.8156 | 1.6263  |
| CEU | BOLA2B | 29303588 | 16.1645 | 12.4511 | 0.91    |
| CEU | BOLA2B | 29308588 | 9.766   | 8.5281  | 0.4319  |
| CEU | BOLA2B | 29313588 | 11.3028 | 9.7221  | 0.4885  |
| CEU | BOLA2B | 29318588 | 12.6595 | 16.0329 | -0.6502 |
| CEU | BOLA2B | 29323588 | 9.3436  | 15.0095 | -1.163  |
| CEU | BOLA2B | 29328588 | 6.4659  | 9.8926  | -1.042  |
| CEU | BOLA2B | 29333588 | 6.1293  | 9.3809  | -1.0388 |
| CEU | BOLA2B | 29338588 | 6.6036  | 9.5515  | -0.9261 |
| CEU | BOLA2B | 29343588 | 7.8602  | 10.2337 | -0.6992 |
| CEU | BOLA2B | 29348588 | 8.3731  | 9.0398  | -0.2204 |
| CEU | BOLA2B | 29353588 | 6.9878  | 7.3342  | -0.1388 |
| CEU | BOLA2B | 29358588 | 5.2663  | 6.1402  | -0.4112 |
| CEU | BOLA2B | 29363588 | 3.0785  | 4.0935  | -0.6825 |
| CEU | BOLA2B | 29368588 | 2.4877  | 3.9229  | -1.001  |
| CEU | BOLA2B | 29373588 | 1.7631  | 3.2407  | -1.2116 |
| CEU | BOLA2B | 29378588 | 0.7172  | 2.5584  | -1.8341 |

## 2\_TajimasD\_data

|     |        |          |        |        |         |
|-----|--------|----------|--------|--------|---------|
| CEU | BOLA2B | 29383588 | 1.6774 | 2.3879 | -0.7482 |
| CEU | BOLA2B | 29388588 | 3.7462 | 2.5584 | 1.1832  |
| CEU | BOLA2B | 29393588 | 4.9052 | 4.4346 | 0.2953  |
| CEU | BOLA2B | 29398588 | 3.691  | 5.458  | -0.9237 |
| CEU | BOLA2B | 29403588 | 3.1272 | 4.7757 | -0.9695 |
| CEU | BOLA2B | 29408588 | 5.1478 | 6.4814 | -0.5977 |
| CEU | BOLA2B | 29413588 | 5.4677 | 9.7221 | -1.3147 |
| CEU | BOLA2B | 29418588 | 4.9324 | 8.6987 | -1.2903 |
| CEU | BOLA2B | 29423588 | 7.3614 | 7.8459 | -0.1825 |
| CEU | BOLA2B | 29428588 | 6.1717 | 8.0164 | -0.6813 |
| CEU | BOLA2B | 29433588 | 5.6516 | 9.3809 | -1.1914 |
| CEU | BOLA2B | 29438588 | 7.6745 | 9.5515 | -0.5897 |
| CEU | BOLA2B | 29443588 | 4.6817 | 4.9463 | -0.1509 |
| CEU | BOLA2B | 29448588 | 0.9221 | 2.0467 | -1.3382 |
| CEU | BOLA2B | 29453588 | 0.0705 | 0.8528 | -1.7617 |
| CEU | BOLA2B | 29458588 | 0.0402 | 0.3411 | -1.2062 |
| CEU | BOLA2B | 29463588 | 0.0101 | 0.1706 | -0.9534 |
| CEU | BOLA2B | 29468588 | 0.5362 | 0.5117 | 0.0768  |
| CEU | BOLA2B | 29473588 | 0.5955 | 0.6822 | -0.2264 |
| CEU | BOLA2B | 29478588 | 0.1288 | 0.5117 | -1.2009 |
| CEU | BOLA2B | 29483588 | 0.1192 | 0.5117 | -1.231  |
| CEU | BOLA2B | 29488588 | 0.0497 | 0.1706 | -0.7182 |
| CEU | BOLA2B | 29493588 | 1.0559 | 0.6822 | 0.9758  |
| CEU | BOLA2B | 29498588 | 1.0559 | 0.6822 | 0.9758  |
| CEU | BOLA2B | 29503588 | 0.1097 | 0.6822 | -1.495  |
| CEU | BOLA2B | 29508588 | 4.6875 | 2.3879 | 2.4217  |
| CEU | BOLA2B | 29513588 | 5.0765 | 1.8762 | 4.0745  |
| CEU | BOLA2B | 29518588 | 0.7565 | 0.3411 | 1.6652  |
| CEU | BOLA2B | 29523588 | 0.2781 | 0.5117 | -0.7326 |
| CEU | BOLA2B | 29528588 | 0.0303 | 0.5117 | -1.5098 |
| CEU | BOLA2B | 29533588 | 0.0303 | 0.3411 | -1.2459 |
| CEU | BOLA2B | 29538588 | 0.0505 | 0.6822 | -1.6496 |
| CEU | BOLA2B | 29543588 | 1.0012 | 0.8528 | 0.3342  |
| CEU | BOLA2B | 29548588 | 0.981  | 0.5117 | 1.4718  |
| CEU | BOLA2B | 29553588 | 0.5683 | 0.5117 | 0.1775  |
| CEU | BOLA2B | 29558588 | 1.4368 | 1.3645 | 0.117   |
| CEU | BOLA2B | 29563588 | 1.2022 | 2.2173 | -1.1341 |
| CEU | BOLA2B | 29568588 | 1.9029 | 2.729  | -0.7808 |
| CEU | BOLA2B | 29573588 | 2.7485 | 3.2407 | -0.4036 |
| CEU | BOLA2B | 29578588 | 3.6652 | 3.2407 | 0.3481  |
| CEU | BOLA2B | 29583588 | 4.235  | 3.0701 | 0.9992  |
| CEU | BOLA2B | 29588588 | 3.4387 | 4.9463 | -0.8598 |
| CEU | BOLA2B | 29593588 | 2.8584 | 5.9697 | -1.5016 |
| CEU | BOLA2B | 29598588 | 3.5741 | 5.2874 | -0.9212 |
| CEU | BOLA2B | 29603588 | 5.9654 | 6.6519 | -0.3006 |
| CEU | BOLA2B | 29608588 | 6.0827 | 7.6753 | -0.6122 |
| CEU | BOLA2B | 29613588 | 5.5092 | 7.3342 | -0.7312 |
| CEU | BOLA2B | 29618588 | 3.6885 | 5.2874 | -0.8597 |
| CEU | BOLA2B | 29623588 | 3.3886 | 4.7757 | -0.8158 |

## 2\_TajimasD\_data

|     |        |          |         |        |         |
|-----|--------|----------|---------|--------|---------|
| CEU | BOLA2B | 29628588 | 3.0517  | 5.9697 | -1.4083 |
| CEU | BOLA2B | 29633588 | 1.128   | 4.4346 | -2.0747 |
| CEU | BOLA2B | 29638588 | 6.2709  | 5.1169 | 0.6388  |
| CEU | BOLA2B | 29643588 | 11.4172 | 6.8225 | 1.9661  |
| CEU | BOLA2B | 29648588 | 8.0569  | 5.7991 | 1.1183  |
| CEU | BOLA2B | 29653588 | 6.0266  | 5.6286 | 0.2024  |
| CEU | BOLA2B | 29658588 | 7.6102  | 6.6519 | 0.4196  |
| CEU | BOLA2B | 29663588 | 5.7619  | 6.4814 | -0.3225 |
| CEU | BOLA2B | 29668588 | 6.6863  | 7.1636 | -0.1954 |
| CEU | BOLA2B | 29673588 | 8.1804  | 7.5047 | 0.2651  |
| CEU | BOLA2B | 29678588 | 8.851   | 7.6753 | 0.4519  |
| CEU | BOLA2B | 29683588 | 9.3043  | 8.187  | 0.4048  |
| CEU | BOLA2B | 29688588 | 8.6883  | 7.1636 | 0.6241  |
| CEU | BOLA2B | 29693588 | 7.6223  | 5.9697 | 0.7976  |
| CEU | BOLA2B | 29698588 | 6.4795  | 5.9697 | 0.246   |
| CEU | BOLA2B | 29703588 | 4.5516  | 6.3108 | -0.8077 |
| CEU | BOLA2B | 29708588 | 3.5749  | 6.4814 | -1.3027 |
| CEU | BOLA2B | 29713588 | 4.597   | 6.1402 | -0.7262 |
| CEU | BOLA2B | 29718588 | 4.9629  | 5.2874 | -0.1745 |
| CEU | BOLA2B | 29723588 | 6.0375  | 7.1636 | -0.461  |
| CEU | BOLA2B | 29728588 | 5.6116  | 9.3809 | -1.2041 |
| CEU | BOLA2B | 29733588 | 5.4655  | 7.5047 | -0.8001 |
| CEU | BOLA2B | 29738588 | 5.9074  | 6.3108 | -0.1852 |
| CEU | BOLA2B | 29743588 | 5.7926  | 6.9931 | -0.5023 |
| CEU | BOLA2B | 29748588 | 7.3245  | 7.5047 | -0.0707 |
| CEU | BOLA2B | 29753588 | 5.605   | 7.8459 | -0.8442 |
| CEU | BOLA2B | 29758588 | 3.0029  | 8.0164 | -1.8518 |
| CEU | BOLA2B | 29763588 | 5.1892  | 8.5281 | -1.165  |
| CEU | BOLA2B | 29768588 | 3.7376  | 6.6519 | -1.2759 |
| CEU | BOLA2B | 29773588 | 1.0287  | 6.6519 | -2.4619 |
| CEU | BOLA2B | 29778588 | 1.3115  | 6.8225 | -2.3581 |
| CEU | BOLA2B | 29783588 | 1.9359  | 5.2874 | -1.8021 |
| CEU | BOLA2B | 29788588 | 2.0245  | 6.6519 | -2.026  |
| CEU | BOLA2B | 29793588 | 2.0886  | 6.3108 | -1.9385 |
| CEU | BOLA2B | 29798588 | 1.4539  | 4.9463 | -1.9917 |
| CEU | BOLA2B | 29803588 | 0.522   | 4.6052 | -2.4791 |
| CEU | BOLA2B | 29808588 | 0.8291  | 3.4112 | -2.028  |
| CEU | BOLA2B | 29813588 | 0.5953  | 3.2407 | -2.1692 |
| CEU | BOLA2B | 29818588 | 0.8139  | 5.9697 | -2.4883 |
| CEU | BOLA2B | 29823588 | 1.8716  | 6.9931 | -2.1429 |
| CEU | BOLA2B | 29828588 | 3.5773  | 6.9931 | -1.4292 |
| CEU | BOLA2B | 29833588 | 4.4136  | 7.5047 | -1.2128 |
| CEU | BOLA2B | 29838588 | 4.6842  | 5.6286 | -0.4804 |
| CEU | BOLA2B | 29843588 | 4.1509  | 4.6052 | -0.2758 |
| CEU | BOLA2B | 29848588 | 2.8023  | 4.2641 | -0.9489 |
| CEU | BOLA2B | 29853588 | 2.3111  | 4.9463 | -1.5029 |
| CEU | BOLA2B | 29858588 | 3.1387  | 5.1169 | -1.095  |
| CEU | BOLA2B | 29863588 | 3.2548  | 4.4346 | -0.7402 |
| CEU | BOLA2B | 29868588 | 2.8079  | 4.0935 | -0.8645 |



## 2\_TajimasD\_data

|     |        |          |        |         |         |
|-----|--------|----------|--------|---------|---------|
| CEU | BOLA2B | 29873588 | 4.5764 | 5.1169  | -0.2992 |
| CEU | BOLA2B | 29878588 | 5.0138 | 5.7991  | -0.389  |
| CEU | BOLA2B | 29883588 | 3.9338 | 4.9463  | -0.5774 |
| CEU | BOLA2B | 29888588 | 2.9501 | 5.1169  | -1.1994 |
| CEU | BOLA2B | 29893588 | 3.3888 | 5.7991  | -1.1938 |
| CEU | BOLA2B | 29898588 | 4.1033 | 6.4814  | -1.0659 |
| CEU | BOLA2B | 29903588 | 4.2455 | 6.3108  | -0.9482 |
| CEU | BOLA2B | 29908588 | 6.6261 | 4.7757  | 1.0883  |
| CEU | BOLA2B | 29913588 | 6.9781 | 4.7757  | 1.2953  |
| CEU | BOLA2B | 29918588 | 5.6366 | 5.9697  | -0.1608 |
| CEU | BOLA2B | 29923588 | 5.9606 | 5.7991  | 0.08    |
| CEU | BOLA2B | 29928588 | 5.666  | 5.2874  | 0.2036  |
| CEU | BOLA2B | 29933588 | 7.6999 | 6.3108  | 0.6378  |
| CEU | BOLA2B | 29938588 | 8.5079 | 6.9931  | 0.6338  |
| CEU | BOLA2B | 29943588 | 6.65   | 6.3108  | 0.1557  |
| CEU | BOLA2B | 29948588 | 4.6924 | 4.9463  | -0.1448 |
| CHB | BOLA2B | 28958588 | 6.6773 | 7.1154  | -0.1799 |
| CHB | BOLA2B | 28963588 | 6.4967 | 7.1154  | -0.2541 |
| CHB | BOLA2B | 28968588 | 6.4203 | 7.1154  | -0.2855 |
| CHB | BOLA2B | 28973588 | 5.5509 | 7.7931  | -0.8474 |
| CHB | BOLA2B | 28978588 | 5.8751 | 7.9625  | -0.7735 |
| CHB | BOLA2B | 28983588 | 6.7866 | 8.4708  | -0.5896 |
| CHB | BOLA2B | 28988588 | 5.9395 | 9.1484  | -1.0462 |
| CHB | BOLA2B | 28993588 | 5.5102 | 7.6237  | -0.815  |
| CHB | BOLA2B | 28998588 | 5.0274 | 6.4378  | -0.6342 |
| CHB | BOLA2B | 29003588 | 6.7908 | 9.6567  | -0.8887 |
| CHB | BOLA2B | 29008588 | 8.016  | 10.5037 | -0.7132 |
| CHB | BOLA2B | 29013588 | 7.1108 | 7.9625  | -0.3156 |
| CHB | BOLA2B | 29018588 | 7.0647 | 7.4543  | -0.1534 |
| CHB | BOLA2B | 29023588 | 7.5743 | 8.4708  | -0.3138 |
| CHB | BOLA2B | 29028588 | 8.4719 | 9.4872  | -0.32   |
| CHB | BOLA2B | 29033588 | 8.1028 | 9.3178  | -0.3895 |
| CHB | BOLA2B | 29038588 | 5.5863 | 7.4543  | -0.7353 |
| CHB | BOLA2B | 29043588 | 4.2189 | 5.0825  | -0.4795 |
| CHB | BOLA2B | 29048588 | 2.0306 | 2.3718  | -0.3602 |
| CHB | BOLA2B | 29053588 | 1.5866 | 2.033   | -0.5323 |
| CHB | BOLA2B | 29058588 | 4.3627 | 4.066   | 0.2001  |
| CHB | BOLA2B | 29063588 | 4.9513 | 4.7436  | 0.1225  |
| CHB | BOLA2B | 29068588 | 3.996  | 4.066   | -0.0472 |
| CHB | BOLA2B | 29073588 | 3.9469 | 3.5577  | 0.2941  |
| CHB | BOLA2B | 29078588 | 4.739  | 3.5577  | 0.8928  |
| CHB | BOLA2B | 29083588 | 4.7521 | 5.0825  | -0.1834 |
| CHB | BOLA2B | 29088588 | 4.4338 | 5.7601  | -0.6589 |
| CHB | BOLA2B | 29093588 | 5.4578 | 6.946   | -0.6247 |
| CHB | BOLA2B | 29098588 | 5.7866 | 8.8096  | -1.0206 |
| CHB | BOLA2B | 29103588 | 5.8237 | 9.3178  | -1.12   |
| CHB | BOLA2B | 29108588 | 6.6438 | 8.8096  | -0.7312 |
| CHB | BOLA2B | 29113588 | 8.5585 | 8.8096  | -0.0848 |
| CHB | BOLA2B | 29118588 | 8.8561 | 9.8261  | -0.2959 |

## 2\_TajimasD\_data

|     |        |          |         |         |         |
|-----|--------|----------|---------|---------|---------|
| CHB | BOLA2B | 29123588 | 8.0158  | 8.979   | -0.3195 |
| CHB | BOLA2B | 29128588 | 16.0114 | 11.1814 | 1.306   |
| CHB | BOLA2B | 29133588 | 22.9497 | 14.2309 | 1.8773  |
| CHB | BOLA2B | 29138588 | 24.7619 | 15.925  | 1.7094  |
| CHB | BOLA2B | 29143588 | 18.5682 | 14.0615 | 0.9815  |
| CHB | BOLA2B | 29148588 | 18.7226 | 15.4168 | 0.6596  |
| CHB | BOLA2B | 29153588 | 24.7803 | 17.2803 | 1.3417  |
| CHB | BOLA2B | 29158588 | 21.9566 | 14.9085 | 1.4519  |
| CHB | BOLA2B | 29163588 | 15.9885 | 16.0944 | -0.0203 |
| CHB | BOLA2B | 29168588 | 7.3077  | 12.8755 | -1.3181 |
| CHB | BOLA2B | 29173588 | 3.6288  | 7.9625  | -1.6059 |
| CHB | BOLA2B | 29178588 | 5.0335  | 11.8591 | -1.7463 |
| CHB | BOLA2B | 29183588 | 7.7954  | 16.2638 | -1.6055 |
| CHB | BOLA2B | 29188588 | 17.9907 | 17.6192 | 0.0652  |
| CHB | BOLA2B | 29193588 | 16.558  | 15.5862 | 0.1919  |
| CHB | BOLA2B | 29198588 | 7.201   | 9.6567  | -0.7615 |
| CHB | BOLA2B | 29203588 | 9.1776  | 10.3343 | -0.3367 |
| CHB | BOLA2B | 29208588 | 10.2465 | 14.2309 | -0.8579 |
| CHB | BOLA2B | 29213588 | 10.4662 | 16.2638 | -1.0991 |
| CHB | BOLA2B | 29218588 | 8.7139  | 13.045  | -1.0128 |
| CHB | BOLA2B | 29223588 | 8.1374  | 8.3013  | -0.0585 |
| CHB | BOLA2B | 29228588 | 11.329  | 9.1484  | 0.711   |
| CHB | BOLA2B | 29233588 | 14.6743 | 14.4003 | 0.0583  |
| CHB | BOLA2B | 29238588 | 14.9762 | 16.6027 | -0.3023 |
| CHB | BOLA2B | 29243588 | 12.918  | 13.5532 | -0.1433 |
| CHB | BOLA2B | 29248588 | 12.3179 | 11.1814 | 0.3073  |
| CHB | BOLA2B | 29253588 | 14.1262 | 9.6567  | 1.3859  |
| CHB | BOLA2B | 29258588 | 16.2852 | 10.6731 | 1.5851  |
| CHB | BOLA2B | 29263588 | 20.7021 | 17.6192 | 0.5414  |
| CHB | BOLA2B | 29268588 | 24.7809 | 19.991  | 0.7449  |
| CHB | BOLA2B | 29273588 | 32.0339 | 21.5157 | 1.5238  |
| CHB | BOLA2B | 29278588 | 41.5412 | 25.2428 | 2.0228  |
| CHB | BOLA2B | 29283588 | 40.7064 | 24.0569 | 2.1651  |
| CHB | BOLA2B | 29288588 | 27.8093 | 17.958  | 1.6985  |
| CHB | BOLA2B | 29293588 | 20.172  | 14.4003 | 1.2288  |
| CHB | BOLA2B | 29298588 | 26.2417 | 20.3298 | 0.9047  |
| CHB | BOLA2B | 29303588 | 23.5283 | 22.1934 | 0.1877  |
| CHB | BOLA2B | 29308588 | 13.617  | 15.925  | -0.4465 |
| CHB | BOLA2B | 29313588 | 12.1483 | 11.8591 | 0.074   |
| CHB | BOLA2B | 29318588 | 19.5302 | 15.925  | 0.6974  |
| CHB | BOLA2B | 29323588 | 18.2599 | 16.4333 | 0.3429  |
| CHB | BOLA2B | 29328588 | 8.948   | 13.2144 | -0.9855 |
| CHB | BOLA2B | 29333588 | 7.2054  | 10.1649 | -0.8749 |
| CHB | BOLA2B | 29338588 | 7.7072  | 7.6237  | 0.0322  |
| CHB | BOLA2B | 29343588 | 11.1013 | 9.6567  | 0.4479  |
| CHB | BOLA2B | 29348588 | 11.774  | 9.4872  | 0.7208  |
| CHB | BOLA2B | 29353588 | 9.044   | 7.6237  | 0.5477  |
| CHB | BOLA2B | 29358588 | 6.4264  | 6.2684  | 0.0728  |
| CHB | BOLA2B | 29363588 | 3.1123  | 5.5907  | -1.2645 |

## 2\_TajimasD\_data

|     |        |          |        |         |         |
|-----|--------|----------|--------|---------|---------|
| CHB | BOLA2B | 29368588 | 3.0008 | 4.7436  | -1.028  |
| CHB | BOLA2B | 29373588 | 2.26   | 2.2024  | 0.0645  |
| CHB | BOLA2B | 29378588 | 1.3145 | 2.3718  | -1.1161 |
| CHB | BOLA2B | 29383588 | 2.3276 | 3.3883  | -0.8353 |
| CHB | BOLA2B | 29388588 | 4.1576 | 4.7436  | -0.3457 |
| CHB | BOLA2B | 29393588 | 4.9265 | 5.2519  | -0.1755 |
| CHB | BOLA2B | 29398588 | 4.435  | 4.7436  | -0.182  |
| CHB | BOLA2B | 29403588 | 4.5991 | 5.0825  | -0.2684 |
| CHB | BOLA2B | 29408588 | 6.9221 | 8.3013  | -0.4919 |
| CHB | BOLA2B | 29413588 | 7.5167 | 10.1649 | -0.7828 |
| CHB | BOLA2B | 29418588 | 5.6244 | 8.3013  | -0.9547 |
| CHB | BOLA2B | 29423588 | 7.2688 | 8.6402  | -0.4714 |
| CHB | BOLA2B | 29428588 | 5.7916 | 7.2848  | -0.6002 |
| CHB | BOLA2B | 29433588 | 4.7334 | 7.1154  | -0.9782 |
| CHB | BOLA2B | 29438588 | 6.3864 | 8.3013  | -0.6829 |
| CHB | BOLA2B | 29443588 | 3.8519 | 5.0825  | -0.6832 |
| CHB | BOLA2B | 29448588 | 0.6785 | 1.5247  | -1.2572 |
| CHB | BOLA2B | 29453588 | 0.0386 | 0.5082  | -1.4741 |
| CHB | BOLA2B | 29458588 | 0.0958 | 0.5082  | -1.2946 |
| CHB | BOLA2B | 29463588 | 0.0862 | 0.5082  | -1.3247 |
| CHB | BOLA2B | 29468588 | 0.5121 | 0.6777  | -0.4329 |
| CHB | BOLA2B | 29473588 | 0.5408 | 0.6777  | -0.3579 |
| CHB | BOLA2B | 29478588 | 0.1133 | 0.6777  | -1.4755 |
| CHB | BOLA2B | 29483588 | 0.2648 | 1.0165  | -1.4959 |
| CHB | BOLA2B | 29488588 | 0.19   | 0.5082  | -0.9989 |
| CHB | BOLA2B | 29493588 | 0.3564 | 1.1859  | -1.4806 |
| CHB | BOLA2B | 29498588 | 0.3758 | 1.5247  | -1.7069 |
| CHB | BOLA2B | 29503588 | 0.7002 | 1.1859  | -0.867  |
| CHB | BOLA2B | 29508588 | 4.8346 | 2.5412  | 2.2901  |
| CHB | BOLA2B | 29513588 | 4.6568 | 1.8636  | 3.5637  |
| CHB | BOLA2B | 29518588 | 0.7249 | 0.3388  | 1.5488  |
| CHB | BOLA2B | 29523588 | 0.2701 | 0.6777  | -1.0656 |
| CHB | BOLA2B | 29528588 | 0.0482 | 0.5082  | -1.444  |
| CHB | BOLA2B | 29533588 | 0.0967 | 0.6777  | -1.5189 |
| CHB | BOLA2B | 29538588 | 0.1064 | 0.8471  | -1.6703 |
| CHB | BOLA2B | 29543588 | 0.8397 | 0.5082  | 1.0406  |
| CHB | BOLA2B | 29548588 | 0.83   | 0.3388  | 1.9704  |
| CHB | BOLA2B | 29553588 | 0.6611 | 0.6777  | -0.0434 |
| CHB | BOLA2B | 29558588 | 1.3132 | 2.2024  | -0.9957 |
| CHB | BOLA2B | 29563588 | 1.874  | 3.3883  | -1.1925 |
| CHB | BOLA2B | 29568588 | 2.8662 | 3.0495  | -0.1576 |
| CHB | BOLA2B | 29573588 | 2.9098 | 2.033   | 1.0456  |
| CHB | BOLA2B | 29578588 | 2.3998 | 2.033   | 0.4374  |
| CHB | BOLA2B | 29583588 | 2.6878 | 4.5742  | -1.1487 |
| CHB | BOLA2B | 29588588 | 3.2376 | 5.7601  | -1.2532 |
| CHB | BOLA2B | 29593588 | 2.8894 | 5.9295  | -1.4718 |
| CHB | BOLA2B | 29598588 | 3.8612 | 7.4543  | -1.4143 |
| CHB | BOLA2B | 29603588 | 5.4417 | 6.7766  | -0.573  |
| CHB | BOLA2B | 29608588 | 3.8561 | 5.2519  | -0.7528 |

## 2\_TajimasD\_data

|     |        |          |         |         |         |
|-----|--------|----------|---------|---------|---------|
| CHB | BOLA2B | 29613588 | 3.2465  | 6.4378  | -1.4349 |
| CHB | BOLA2B | 29618588 | 2.5557  | 6.0989  | -1.6725 |
| CHB | BOLA2B | 29623588 | 2.4359  | 4.913   | -1.4169 |
| CHB | BOLA2B | 29628588 | 2.352   | 5.0825  | -1.5159 |
| CHB | BOLA2B | 29633588 | 0.9802  | 4.7436  | -2.2199 |
| CHB | BOLA2B | 29638588 | 3.1961  | 6.6072  | -1.4982 |
| CHB | BOLA2B | 29643588 | 4.6214  | 7.6237  | -1.1578 |
| CHB | BOLA2B | 29648588 | 4.5416  | 7.4543  | -1.1465 |
| CHB | BOLA2B | 29653588 | 8.1361  | 7.7931  | 0.1296  |
| CHB | BOLA2B | 29658588 | 10.3265 | 7.9625  | 0.876   |
| CHB | BOLA2B | 29663588 | 8.5332  | 8.8096  | -0.0933 |
| CHB | BOLA2B | 29668588 | 8.9166  | 8.8096  | 0.0361  |
| CHB | BOLA2B | 29673588 | 10.2576 | 7.4543  | 1.1035  |
| CHB | BOLA2B | 29678588 | 8.752   | 7.1154  | 0.6721  |
| CHB | BOLA2B | 29683588 | 7.3328  | 7.2848  | 0.0193  |
| CHB | BOLA2B | 29688588 | 7.8479  | 6.7766  | 0.4599  |
| CHB | BOLA2B | 29693588 | 7.7639  | 7.4543  | 0.1219  |
| CHB | BOLA2B | 29698588 | 5.1253  | 6.6072  | -0.6509 |
| CHB | BOLA2B | 29703588 | 1.7933  | 5.4213  | -1.9024 |
| CHB | BOLA2B | 29708588 | 1.8083  | 6.2684  | -2.0542 |
| CHB | BOLA2B | 29713588 | 2.787   | 7.7931  | -1.892  |
| CHB | BOLA2B | 29718588 | 3.3903  | 9.8261  | -1.9636 |
| CHB | BOLA2B | 29723588 | 3.9103  | 9.4872  | -1.758  |
| CHB | BOLA2B | 29728588 | 3.3086  | 9.4872  | -1.9476 |
| CHB | BOLA2B | 29733588 | 2.6773  | 10.1649 | -2.2134 |
| CHB | BOLA2B | 29738588 | 2.8968  | 7.7931  | -1.8505 |
| CHB | BOLA2B | 29743588 | 3.3962  | 6.4378  | -1.3676 |
| CHB | BOLA2B | 29748588 | 5.7889  | 10.8426 | -1.4065 |
| CHB | BOLA2B | 29753588 | 5.0171  | 11.1814 | -1.6668 |
| CHB | BOLA2B | 29758588 | 2.4495  | 7.7931  | -2.0196 |
| CHB | BOLA2B | 29763588 | 4.7114  | 9.6567  | -1.5334 |
| CHB | BOLA2B | 29768588 | 4.608   | 10.6731 | -1.713  |
| CHB | BOLA2B | 29773588 | 2.4932  | 10.3343 | -2.2824 |
| CHB | BOLA2B | 29778588 | 1.8993  | 9.4872  | -2.3919 |
| CHB | BOLA2B | 29783588 | 2.3786  | 6.7766  | -1.8879 |
| CHB | BOLA2B | 29788588 | 3.7184  | 7.6237  | -1.506  |
| CHB | BOLA2B | 29793588 | 3.2972  | 9.1484  | -1.9077 |
| CHB | BOLA2B | 29798588 | 1.9836  | 8.1319  | -2.2347 |
| CHB | BOLA2B | 29803588 | 1.106   | 5.9295  | -2.3351 |
| CHB | BOLA2B | 29808588 | 0.7872  | 3.5577  | -2.0938 |
| CHB | BOLA2B | 29813588 | 1.0992  | 4.7436  | -2.1497 |
| CHB | BOLA2B | 29818588 | 1.2378  | 6.946   | -2.3961 |
| CHB | BOLA2B | 29823588 | 1.4801  | 6.946   | -2.2944 |
| CHB | BOLA2B | 29828588 | 2.9214  | 7.6237  | -1.8133 |
| CHB | BOLA2B | 29833588 | 3.1085  | 6.7766  | -1.5746 |
| CHB | BOLA2B | 29838588 | 2.596   | 6.0989  | -1.6535 |
| CHB | BOLA2B | 29843588 | 2.3318  | 6.4378  | -1.8462 |
| CHB | BOLA2B | 29848588 | 1.6389  | 4.913   | -1.8728 |
| CHB | BOLA2B | 29853588 | 1.4201  | 5.5907  | -2.1279 |

## 2\_TajimasD\_data

|     |        |          |         |         |         |
|-----|--------|----------|---------|---------|---------|
| CHB | BOLA2B | 29858588 | 1.8239  | 6.946   | -2.1501 |
| CHB | BOLA2B | 29863588 | 2.5854  | 7.4543  | -1.9165 |
| CHB | BOLA2B | 29868588 | 2.0857  | 6.4378  | -1.9568 |
| CHB | BOLA2B | 29873588 | 2.4064  | 6.946   | -1.9055 |
| CHB | BOLA2B | 29878588 | 2.7243  | 6.6072  | -1.7054 |
| CHB | BOLA2B | 29883588 | 3.8719  | 5.2519  | -0.7443 |
| CHB | BOLA2B | 29888588 | 5.1228  | 5.4213  | -0.1565 |
| CHB | BOLA2B | 29893588 | 5.6636  | 5.7601  | -0.0479 |
| CHB | BOLA2B | 29898588 | 7.9364  | 6.2684  | 0.7682  |
| CHB | BOLA2B | 29903588 | 7.5711  | 5.9295  | 0.7947  |
| CHB | BOLA2B | 29908588 | 7.1485  | 6.0989  | 0.4955  |
| CHB | BOLA2B | 29913588 | 7.1658  | 5.9295  | 0.5985  |
| CHB | BOLA2B | 29918588 | 6.2994  | 6.6072  | -0.1352 |
| CHB | BOLA2B | 29923588 | 5.9629  | 6.946   | -0.4127 |
| CHB | BOLA2B | 29928588 | 5.6212  | 6.0989  | -0.2255 |
| CHB | BOLA2B | 29933588 | 7.1972  | 7.4543  | -0.1012 |
| CHB | BOLA2B | 29938588 | 7.5989  | 7.1154  | 0.1986  |
| CHB | BOLA2B | 29943588 | 6.3874  | 5.7601  | 0.3117  |
| CHB | BOLA2B | 29948588 | 4.3341  | 5.9295  | -0.7724 |
| YRI | BOLA2B | 28958588 | 8.0622  | 9.7476  | -0.5163 |
| YRI | BOLA2B | 28963588 | 7.7726  | 11.4282 | -0.9651 |
| YRI | BOLA2B | 28968588 | 8.1207  | 11.4282 | -0.8732 |
| YRI | BOLA2B | 28973588 | 6.9439  | 10.0837 | -0.9319 |
| YRI | BOLA2B | 28978588 | 6.8357  | 10.4199 | -1.0318 |
| YRI | BOLA2B | 28983588 | 8.8025  | 12.2685 | -0.8559 |
| YRI | BOLA2B | 28988588 | 8.8949  | 13.1089 | -0.9775 |
| YRI | BOLA2B | 28993588 | 6.891   | 9.5795  | -0.837  |
| YRI | BOLA2B | 28998588 | 7.235   | 8.7392  | -0.5099 |
| YRI | BOLA2B | 29003588 | 12.6551 | 13.445  | -0.1789 |
| YRI | BOLA2B | 29008588 | 12.7541 | 14.9575 | -0.4509 |
| YRI | BOLA2B | 29013588 | 8.0193  | 11.5963 | -0.9315 |
| YRI | BOLA2B | 29018588 | 8.0279  | 10.2518 | -0.65   |
| YRI | BOLA2B | 29023588 | 8.8918  | 11.0921 | -0.5974 |
| YRI | BOLA2B | 29028588 | 9.9347  | 12.1005 | -0.5418 |
| YRI | BOLA2B | 29033588 | 10.213  | 10.924  | -0.1958 |
| YRI | BOLA2B | 29038588 | 6.7662  | 8.7392  | -0.6688 |
| YRI | BOLA2B | 29043588 | 5.0361  | 9.4115  | -1.3848 |
| YRI | BOLA2B | 29048588 | 2.4714  | 5.7141  | -1.617  |
| YRI | BOLA2B | 29053588 | 1.9965  | 2.1848  | -0.2114 |
| YRI | BOLA2B | 29058588 | 4.2444  | 4.2016  | 0.028   |
| YRI | BOLA2B | 29063588 | 5.6892  | 6.2183  | -0.2446 |
| YRI | BOLA2B | 29068588 | 5.2812  | 6.3864  | -0.4988 |
| YRI | BOLA2B | 29073588 | 3.549   | 5.2099  | -0.899  |
| YRI | BOLA2B | 29078588 | 4.5209  | 5.7141  | -0.595  |
| YRI | BOLA2B | 29083588 | 5.1621  | 7.5628  | -0.9294 |
| YRI | BOLA2B | 29088588 | 6.0828  | 8.5712  | -0.8588 |
| YRI | BOLA2B | 29093588 | 8.5599  | 11.0921 | -0.6875 |
| YRI | BOLA2B | 29098588 | 7.7046  | 12.6047 | -1.1796 |
| YRI | BOLA2B | 29103588 | 6.6989  | 11.7644 | -1.3014 |

## 2\_TajimasD\_data

|     |        |          |         |         |         |
|-----|--------|----------|---------|---------|---------|
| YRI | BOLA2B | 29108588 | 9.1946  | 10.756  | -0.4363 |
| YRI | BOLA2B | 29113588 | 12.127  | 11.9324 | 0.0493  |
| YRI | BOLA2B | 29118588 | 11.4679 | 14.7895 | -0.6871 |
| YRI | BOLA2B | 29123588 | 10.8049 | 15.4617 | -0.9234 |
| YRI | BOLA2B | 29128588 | 16.1031 | 16.302  | -0.0375 |
| YRI | BOLA2B | 29133588 | 18.9053 | 16.8062 | 0.3844  |
| YRI | BOLA2B | 29138588 | 20.7801 | 20.1675 | 0.0942  |
| YRI | BOLA2B | 29143588 | 18.4842 | 20.6717 | -0.3283 |
| YRI | BOLA2B | 29148588 | 16.8641 | 21.0078 | -0.6123 |
| YRI | BOLA2B | 29153588 | 16.6197 | 21.68   | -0.7253 |
| YRI | BOLA2B | 29158588 | 14.9345 | 18.4868 | -0.5936 |
| YRI | BOLA2B | 29163588 | 17.9298 | 23.1926 | -0.7067 |
| YRI | BOLA2B | 29168588 | 14.4919 | 24.201  | -1.2511 |
| YRI | BOLA2B | 29173588 | 10.6263 | 18.823  | -1.3463 |
| YRI | BOLA2B | 29178588 | 12.7074 | 17.4785 | -0.8414 |
| YRI | BOLA2B | 29183588 | 15.9442 | 16.8062 | -0.1578 |
| YRI | BOLA2B | 29188588 | 18.8011 | 18.3188 | 0.0813  |
| YRI | BOLA2B | 29193588 | 15.0852 | 17.6465 | -0.4476 |
| YRI | BOLA2B | 29198588 | 10.0407 | 13.1089 | -0.7117 |
| YRI | BOLA2B | 29203588 | 13.5439 | 13.2769 | 0.0612  |
| YRI | BOLA2B | 29208588 | 17.3191 | 17.1423 | 0.0318  |
| YRI | BOLA2B | 29213588 | 23.6319 | 22.3523 | 0.1781  |
| YRI | BOLA2B | 29218588 | 23.8645 | 20.1675 | 0.5682  |
| YRI | BOLA2B | 29223588 | 15.7368 | 14.7895 | 0.196   |
| YRI | BOLA2B | 29228588 | 14.5449 | 17.4785 | -0.5174 |
| YRI | BOLA2B | 29233588 | 16.6537 | 21.3439 | -0.6825 |
| YRI | BOLA2B | 29238588 | 17.6439 | 22.1842 | -0.6365 |
| YRI | BOLA2B | 29243588 | 19.6373 | 20.3355 | -0.1065 |
| YRI | BOLA2B | 29248588 | 17.6875 | 17.6465 | 0.0072  |
| YRI | BOLA2B | 29253588 | 14.5706 | 15.9659 | -0.2683 |
| YRI | BOLA2B | 29258588 | 17.7523 | 16.9743 | 0.1411  |
| YRI | BOLA2B | 29263588 | 25.4461 | 22.8565 | 0.3527  |
| YRI | BOLA2B | 29268588 | 31.5816 | 26.5538 | 0.5921  |
| YRI | BOLA2B | 29273588 | 40.1235 | 27.3941 | 1.4543  |
| YRI | BOLA2B | 29278588 | 47.5042 | 28.7386 | 2.0462  |
| YRI | BOLA2B | 29283588 | 45.5556 | 29.2428 | 1.7488  |
| YRI | BOLA2B | 29288588 | 34.0826 | 24.0329 | 1.3038  |
| YRI | BOLA2B | 29293588 | 24.1633 | 19.9994 | 0.6451  |
| YRI | BOLA2B | 29298588 | 30.8824 | 24.369  | 0.8337  |
| YRI | BOLA2B | 29303588 | 35.8462 | 31.0915 | 0.4802  |
| YRI | BOLA2B | 29308588 | 23.5396 | 25.0413 | -0.1872 |
| YRI | BOLA2B | 29313588 | 13.5074 | 14.7895 | -0.2652 |
| YRI | BOLA2B | 29318588 | 21.7225 | 21.0078 | 0.1056  |
| YRI | BOLA2B | 29323588 | 22.191  | 22.6884 | -0.0682 |
| YRI | BOLA2B | 29328588 | 12.2539 | 16.8062 | -0.8336 |
| YRI | BOLA2B | 29333588 | 8.2151  | 13.7811 | -1.2314 |
| YRI | BOLA2B | 29338588 | 8.2439  | 14.2853 | -1.2917 |
| YRI | BOLA2B | 29343588 | 10.6909 | 16.4701 | -1.0789 |
| YRI | BOLA2B | 29348588 | 11.6227 | 16.6382 | -0.9273 |

## 2\_TajimasD\_data

|     |        |          |        |         |         |
|-----|--------|----------|--------|---------|---------|
| YRI | BOLA2B | 29353588 | 9.5837 | 13.613  | -0.9018 |
| YRI | BOLA2B | 29358588 | 6.9763 | 9.4115  | -0.7707 |
| YRI | BOLA2B | 29363588 | 6.388  | 9.2434  | -0.9189 |
| YRI | BOLA2B | 29368588 | 4.7996 | 8.235   | -1.2301 |
| YRI | BOLA2B | 29373588 | 2.1132 | 4.8738  | -1.5847 |
| YRI | BOLA2B | 29378588 | 1.7641 | 3.5293  | -1.3384 |
| YRI | BOLA2B | 29383588 | 2.5181 | 3.1932  | -0.5568 |
| YRI | BOLA2B | 29388588 | 4.4029 | 4.5377  | -0.0824 |
| YRI | BOLA2B | 29393588 | 5.1112 | 6.3864  | -0.5755 |
| YRI | BOLA2B | 29398588 | 4.3559 | 7.7309  | -1.2806 |
| YRI | BOLA2B | 29403588 | 4.0254 | 8.4031  | -1.5386 |
| YRI | BOLA2B | 29408588 | 5.7287 | 11.4282 | -1.5047 |
| YRI | BOLA2B | 29413588 | 7.3089 | 14.1172 | -1.4721 |
| YRI | BOLA2B | 29418588 | 6.1262 | 12.4366 | -1.5385 |
| YRI | BOLA2B | 29423588 | 5.607  | 11.5963 | -1.5597 |
| YRI | BOLA2B | 29428588 | 4.3744 | 10.924  | -1.8039 |
| YRI | BOLA2B | 29433588 | 5.7877 | 12.4366 | -1.621  |
| YRI | BOLA2B | 29438588 | 8.8861 | 14.7895 | -1.2212 |
| YRI | BOLA2B | 29443588 | 5.0323 | 8.5712  | -1.2213 |
| YRI | BOLA2B | 29448588 | 0.246  | 1.6806  | -1.9736 |
| YRI | BOLA2B | 29453588 | 0.0648 | 0.8403  | -1.7516 |
| YRI | BOLA2B | 29458588 | 0.0278 | 0.3361  | -1.2377 |
| YRI | BOLA2B | 29463588 | 0.0093 | 0.1681  | -0.944  |
| YRI | BOLA2B | 29468588 | 0.5154 | 0.5042  | 0.0352  |
| YRI | BOLA2B | 29473588 | 0.6211 | 0.8403  | -0.4951 |
| YRI | BOLA2B | 29478588 | 0.5323 | 0.8403  | -0.6957 |
| YRI | BOLA2B | 29483588 | 0.6036 | 0.8403  | -0.5346 |
| YRI | BOLA2B | 29488588 | 0.1771 | 0.3361  | -0.6383 |
| YRI | BOLA2B | 29493588 | 0.1831 | 1.3445  | -1.8863 |
| YRI | BOLA2B | 29498588 | 0.2291 | 1.8487  | -2.0716 |
| YRI | BOLA2B | 29503588 | 0.346  | 1.5126  | -1.7371 |
| YRI | BOLA2B | 29508588 | 4.3647 | 2.689   | 1.5925  |
| YRI | BOLA2B | 29513588 | 4.6604 | 2.3529  | 2.4426  |
| YRI | BOLA2B | 29518588 | 0.6502 | 0.8403  | -0.4294 |
| YRI | BOLA2B | 29523588 | 0.1006 | 0.6722  | -1.4964 |
| YRI | BOLA2B | 29528588 | 0.0554 | 0.6722  | -1.6147 |
| YRI | BOLA2B | 29533588 | 0.0093 | 0.1681  | -0.944  |
| YRI | BOLA2B | 29538588 | 0.2394 | 0.8403  | -1.3572 |
| YRI | BOLA2B | 29543588 | 0.8969 | 1.3445  | -0.727  |
| YRI | BOLA2B | 29548588 | 0.6939 | 0.8403  | -0.3307 |
| YRI | BOLA2B | 29553588 | 0.4892 | 1.1764  | -1.2291 |
| YRI | BOLA2B | 29558588 | 1.3441 | 4.5377  | -1.9514 |
| YRI | BOLA2B | 29563588 | 1.7269 | 6.2183  | -2.0763 |
| YRI | BOLA2B | 29568588 | 2.3405 | 4.2016  | -1.2157 |
| YRI | BOLA2B | 29573588 | 2.5275 | 3.3612  | -0.6587 |
| YRI | BOLA2B | 29578588 | 2.4417 | 4.3696  | -1.2173 |
| YRI | BOLA2B | 29583588 | 3.4399 | 6.5544  | -1.3731 |
| YRI | BOLA2B | 29588588 | 4.3013 | 7.8989  | -1.3384 |
| YRI | BOLA2B | 29593588 | 4.0948 | 8.4031  | -1.5142 |

## 2\_TajimasD\_data

|     |        |          |         |         |         |
|-----|--------|----------|---------|---------|---------|
| YRI | BOLA2B | 29598588 | 4.9926  | 10.0837 | -1.5111 |
| YRI | BOLA2B | 29603588 | 6.7787  | 10.924  | -1.1417 |
| YRI | BOLA2B | 29608588 | 5.0169  | 9.2434  | -1.3602 |
| YRI | BOLA2B | 29613588 | 3.8802  | 8.4031  | -1.5896 |
| YRI | BOLA2B | 29618588 | 3.7287  | 7.8989  | -1.5514 |
| YRI | BOLA2B | 29623588 | 3.0543  | 9.0754  | -1.971  |
| YRI | BOLA2B | 29628588 | 3.216   | 8.9073  | -1.8955 |
| YRI | BOLA2B | 29633588 | 2.243   | 6.7225  | -1.9302 |
| YRI | BOLA2B | 29638588 | 7.4627  | 9.4115  | -0.6168 |
| YRI | BOLA2B | 29643588 | 11.3332 | 10.5879 | 0.2114  |
| YRI | BOLA2B | 29648588 | 8.0409  | 10.5879 | -0.7223 |
| YRI | BOLA2B | 29653588 | 9.1338  | 11.7644 | -0.6758 |
| YRI | BOLA2B | 29658588 | 11.6292 | 11.7644 | -0.0347 |
| YRI | BOLA2B | 29663588 | 10.1236 | 11.4282 | -0.3444 |
| YRI | BOLA2B | 29668588 | 11.1081 | 12.2685 | -0.2866 |
| YRI | BOLA2B | 29673588 | 13.4124 | 13.2769 | 0.0311  |
| YRI | BOLA2B | 29678588 | 12.2016 | 14.2853 | -0.4455 |
| YRI | BOLA2B | 29683588 | 10.4299 | 14.6214 | -0.8766 |
| YRI | BOLA2B | 29688588 | 10.1057 | 12.6047 | -0.6016 |
| YRI | BOLA2B | 29693588 | 8.6706  | 12.1005 | -0.8581 |
| YRI | BOLA2B | 29698588 | 6.5837  | 11.7644 | -1.331  |
| YRI | BOLA2B | 29703588 | 4.5621  | 10.0837 | -1.6389 |
| YRI | BOLA2B | 29708588 | 3.5951  | 9.7476  | -1.8847 |
| YRI | BOLA2B | 29713588 | 5.9684  | 12.7727 | -1.6176 |
| YRI | BOLA2B | 29718588 | 7.5352  | 12.2685 | -1.1689 |
| YRI | BOLA2B | 29723588 | 7.4566  | 10.0837 | -0.7798 |
| YRI | BOLA2B | 29728588 | 9.9981  | 14.1172 | -0.8907 |
| YRI | BOLA2B | 29733588 | 10.1761 | 14.4534 | -0.9044 |
| YRI | BOLA2B | 29738588 | 7.5299  | 10.2518 | -0.7955 |
| YRI | BOLA2B | 29743588 | 7.7046  | 8.5712  | -0.2991 |
| YRI | BOLA2B | 29748588 | 17.2576 | 13.7811 | 0.7691  |
| YRI | BOLA2B | 29753588 | 19.0181 | 15.9659 | 0.587   |
| YRI | BOLA2B | 29758588 | 11.9286 | 13.1089 | -0.2738 |
| YRI | BOLA2B | 29763588 | 15.5565 | 14.2853 | 0.2718  |
| YRI | BOLA2B | 29768588 | 14.9366 | 15.7978 | -0.1673 |
| YRI | BOLA2B | 29773588 | 15.5987 | 16.302  | -0.1326 |
| YRI | BOLA2B | 29778588 | 15.689  | 15.4617 | 0.0451  |
| YRI | BOLA2B | 29783588 | 9.777   | 12.1005 | -0.5813 |
| YRI | BOLA2B | 29788588 | 12.9755 | 10.756  | 0.6202  |
| YRI | BOLA2B | 29793588 | 12.4509 | 9.9157  | 0.7644  |
| YRI | BOLA2B | 29798588 | 6.2764  | 8.4031  | -0.7474 |
| YRI | BOLA2B | 29803588 | 3.8738  | 8.067   | -1.5301 |
| YRI | BOLA2B | 29808588 | 3.4753  | 8.067   | -1.6755 |
| YRI | BOLA2B | 29813588 | 4.0855  | 9.2434  | -1.66   |
| YRI | BOLA2B | 29818588 | 4.6206  | 12.4366 | -1.9055 |
| YRI | BOLA2B | 29823588 | 4.7183  | 12.4366 | -1.8817 |
| YRI | BOLA2B | 29828588 | 6.8705  | 10.4199 | -1.0218 |
| YRI | BOLA2B | 29833588 | 8.672   | 13.1089 | -1.0292 |
| YRI | BOLA2B | 29838588 | 7.73    | 12.2685 | -1.1208 |



## 2\_TajimasD\_data

|     |        |          |        |         |         |
|-----|--------|----------|--------|---------|---------|
| YRI | BOLA2B | 29843588 | 5.87   | 7.2267  | -0.5475 |
| YRI | BOLA2B | 29848588 | 4.3924 | 6.7225  | -1.004  |
| YRI | BOLA2B | 29853588 | 4.2596 | 8.4031  | -1.4563 |
| YRI | BOLA2B | 29858588 | 5.3876 | 9.7476  | -1.3356 |
| YRI | BOLA2B | 29863588 | 7.4765 | 12.1005 | -1.1568 |
| YRI | BOLA2B | 29868588 | 6.2403 | 10.2518 | -1.1725 |
| YRI | BOLA2B | 29873588 | 6.116  | 10.5879 | -1.2682 |
| YRI | BOLA2B | 29878588 | 6.9065 | 12.2685 | -1.3241 |
| YRI | BOLA2B | 29883588 | 6.7479 | 9.7476  | -0.9189 |
| YRI | BOLA2B | 29888588 | 6.9275 | 9.5795  | -0.8257 |
| YRI | BOLA2B | 29893588 | 7.7685 | 10.0837 | -0.6872 |
| YRI | BOLA2B | 29898588 | 8.1875 | 9.4115  | -0.3874 |
| YRI | BOLA2B | 29903588 | 7.4684 | 9.5795  | -0.6573 |
| YRI | BOLA2B | 29908588 | 9.0464 | 9.9157  | -0.2621 |
| YRI | BOLA2B | 29913588 | 7.7639 | 7.8989  | -0.0502 |
| YRI | BOLA2B | 29918588 | 6.2738 | 8.235   | -0.7022 |
| YRI | BOLA2B | 29923588 | 6.9871 | 8.9073  | -0.6395 |
| YRI | BOLA2B | 29928588 | 7.2516 | 9.0754  | -0.597  |
| YRI | BOLA2B | 29933588 | 9.0954 | 10.924  | -0.5036 |
| YRI | BOLA2B | 29938588 | 9.6661 | 9.4115  | 0.0806  |
| YRI | BOLA2B | 29943588 | 9.1999 | 8.067   | 0.4134  |
| YRI | BOLA2B | 29948588 | 6.6833 | 7.8989  | -0.4522 |
| CEU | BOLA2B | 29697932 | 6.5549 | 5.7991  | 0.3743  |
| CEU | BOLA2B | 29702932 | 4.5617 | 6.3108  | -0.803  |
| CEU | BOLA2B | 29707932 | 3.5541 | 6.3108  | -1.2657 |
| CEU | BOLA2B | 29712932 | 4.5768 | 5.9697  | -0.6722 |
| CEU | BOLA2B | 29717932 | 4.9664 | 5.458   | -0.257  |
| CEU | BOLA2B | 29722932 | 5.9483 | 6.9931  | -0.4372 |
| CEU | BOLA2B | 29727932 | 4.7083 | 8.3576  | -1.2972 |
| CEU | BOLA2B | 29732932 | 5.2919 | 7.5047  | -0.8682 |
| CEU | BOLA2B | 29737932 | 6.2319 | 6.6519  | -0.1839 |
| CEU | BOLA2B | 29742932 | 5.5253 | 6.9931  | -0.6142 |
| CEU | BOLA2B | 29747932 | 7.7555 | 8.0164  | -0.0964 |
| CEU | BOLA2B | 29752932 | 6.1253 | 7.8459  | -0.6482 |
| CEU | BOLA2B | 29757932 | 3.0435 | 8.187   | -1.8634 |
| CEU | BOLA2B | 29762932 | 5.2092 | 8.6987  | -1.1955 |
| CEU | BOLA2B | 29767932 | 4.0851 | 6.4814  | -1.0741 |
| CEU | BOLA2B | 29772932 | 1.0287 | 6.8225  | -2.4792 |
| CEU | BOLA2B | 29777932 | 1.3113 | 6.9931  | -2.3774 |
| CEU | BOLA2B | 29782932 | 1.9058 | 4.9463  | -1.734  |
| CEU | BOLA2B | 29787932 | 2.0645 | 6.8225  | -2.0359 |
| CEU | BOLA2B | 29792932 | 2.1288 | 6.8225  | -2.0084 |
| CEU | BOLA2B | 29797932 | 1.4539 | 4.7757  | -1.9537 |
| CEU | BOLA2B | 29802932 | 0.502  | 4.4346  | -2.4674 |
| CEU | BOLA2B | 29807932 | 0.8291 | 3.4112  | -2.028  |
| CEU | BOLA2B | 29812932 | 0.6052 | 3.0701  | -2.1144 |
| CEU | BOLA2B | 29817932 | 0.7275 | 5.6286  | -2.493  |
| CEU | BOLA2B | 29822932 | 1.8817 | 7.3342  | -2.1847 |
| CEU | BOLA2B | 29827932 | 3.0626 | 6.9931  | -1.6446 |

## 2\_TajimasD\_data

|     |        |          |        |        |         |
|-----|--------|----------|--------|--------|---------|
| CEU | BOLA2B | 29832932 | 4.4035 | 7.3342 | -1.1742 |
| CEU | BOLA2B | 29837932 | 5.236  | 6.1402 | -0.4255 |
| CEU | BOLA2B | 29842932 | 3.8571 | 4.2641 | -0.2642 |
| CEU | BOLA2B | 29847932 | 2.8516 | 4.2641 | -0.9169 |
| CEU | BOLA2B | 29852932 | 2.5949 | 5.2874 | -1.4478 |
| CEU | BOLA2B | 29857932 | 3.1387 | 5.1169 | -1.095  |
| CEU | BOLA2B | 29862932 | 3.2748 | 4.6052 | -0.8077 |
| CEU | BOLA2B | 29867932 | 2.798  | 4.0935 | -0.8711 |
| CEU | BOLA2B | 29872932 | 3.2581 | 4.6052 | -0.8179 |
| CEU | BOLA2B | 29877932 | 5.0136 | 5.6286 | -0.3128 |
| CEU | BOLA2B | 29882932 | 5.242  | 5.2874 | -0.0244 |
| CEU | BOLA2B | 29887932 | 2.4708 | 5.1169 | -1.4647 |
| CEU | BOLA2B | 29892932 | 2.9332 | 5.6286 | -1.371  |
| CEU | BOLA2B | 29897932 | 4.5725 | 6.3108 | -0.7981 |
| CEU | BOLA2B | 29902932 | 4.4877 | 6.3108 | -0.837  |
| CEU | BOLA2B | 29907932 | 6.6564 | 5.2874 | 0.7361  |
| CEU | BOLA2B | 29912932 | 6.6832 | 4.6052 | 1.2616  |
| CEU | BOLA2B | 29917932 | 4.8701 | 5.2874 | -0.2244 |
| CEU | BOLA2B | 29922932 | 6.0023 | 5.9697 | 0.0157  |
| CEU | BOLA2B | 29927932 | 6.4224 | 5.7991 | 0.3087  |
| CEU | BOLA2B | 29932932 | 8.1767 | 6.6519 | 0.6676  |
| CEU | BOLA2B | 29937932 | 7.4966 | 6.6519 | 0.3698  |
| CEU | BOLA2B | 29942932 | 6.0602 | 5.6286 | 0.2195  |
| CEU | BOLA2B | 29947932 | 5.6741 | 5.2874 | 0.2079  |
| CEU | BOLA2B | 29952932 | 3.3416 | 4.4346 | -0.6858 |
| CEU | BOLA2B | 29957932 | 4.6933 | 5.2874 | -0.3195 |
| CEU | BOLA2B | 29962932 | 5.7857 | 5.1169 | 0.3702  |
| CEU | BOLA2B | 29967932 | 6.7925 | 4.7757 | 1.1862  |
| CEU | BOLA2B | 29972932 | 6.0373 | 4.0935 | 1.3071  |
| CEU | BOLA2B | 29977932 | 5.8081 | 4.2641 | 1.0023  |
| CEU | BOLA2B | 29982932 | 8.2482 | 6.4814 | 0.7919  |
| CEU | BOLA2B | 29987932 | 5.2839 | 4.4346 | 0.5329  |
| CEU | BOLA2B | 29992932 | 5.2352 | 3.9229 | 0.9153  |
| CEU | BOLA2B | 29997932 | 6.0082 | 5.1169 | 0.4934  |
| CEU | BOLA2B | 30002932 | 3.3638 | 4.9463 | -0.9025 |
| CEU | BOLA2B | 30007932 | 4.0804 | 6.1402 | -0.9693 |
| CEU | BOLA2B | 30012932 | 7.9262 | 8.6987 | -0.2647 |
| CEU | BOLA2B | 30017932 | 8.6331 | 7.8459 | 0.2965  |
| CEU | BOLA2B | 30022932 | 7.3191 | 4.9463 | 1.3532  |
| CEU | BOLA2B | 30027932 | 7.3529 | 5.2874 | 1.1106  |
| CEU | BOLA2B | 30032932 | 7.5958 | 7.1636 | 0.1769  |
| CEU | BOLA2B | 30037932 | 7.4529 | 6.9931 | 0.1924  |
| CEU | BOLA2B | 30042932 | 7.5448 | 5.1169 | 1.3439  |
| CEU | BOLA2B | 30047932 | 9.3781 | 5.9697 | 1.6449  |
| CEU | BOLA2B | 30052932 | 7.8081 | 5.7991 | 0.995   |
| CEU | BOLA2B | 30057932 | 5.5962 | 5.1169 | 0.2653  |
| CEU | BOLA2B | 30062932 | 5.608  | 6.1402 | -0.2504 |
| CEU | BOLA2B | 30067932 | 4.4895 | 5.7991 | -0.6486 |
| CEU | BOLA2B | 30072932 | 2.1697 | 4.2641 | -1.3596 |

## 2\_TajimasD\_data

|     |        |          |         |        |         |
|-----|--------|----------|---------|--------|---------|
| CEU | BOLA2B | 30077932 | 2.2727  | 4.2641 | -1.2927 |
| CEU | BOLA2B | 30082932 | 2.8771  | 4.7757 | -1.1166 |
| CEU | BOLA2B | 30087932 | 3.0146  | 5.1169 | -1.1637 |
| CEU | BOLA2B | 30092932 | 5.1789  | 6.6519 | -0.6449 |
| CEU | BOLA2B | 30097932 | 5.0773  | 7.1636 | -0.854  |
| CEU | BOLA2B | 30102932 | 3.7365  | 6.1402 | -1.1311 |
| CEU | BOLA2B | 30107932 | 2.7654  | 4.9463 | -1.2438 |
| CEU | BOLA2B | 30112932 | 2.3989  | 4.7757 | -1.3979 |
| CEU | BOLA2B | 30117932 | 6.4869  | 7.8459 | -0.512  |
| CEU | BOLA2B | 30122932 | 6.9615  | 7.3342 | -0.1493 |
| CEU | BOLA2B | 30127932 | 3.3944  | 4.6052 | -0.7351 |
| CEU | BOLA2B | 30132932 | 3.348   | 4.7757 | -0.8397 |
| CEU | BOLA2B | 30137932 | 6.1276  | 6.4814 | -0.1586 |
| CEU | BOLA2B | 30142932 | 6.1072  | 6.8225 | -0.3061 |
| CEU | BOLA2B | 30147932 | 3.0787  | 5.2874 | -1.1876 |
| CEU | BOLA2B | 30152932 | 5.5537  | 6.9931 | -0.6023 |
| CEU | BOLA2B | 30157932 | 7.9839  | 7.3342 | 0.2603  |
| CEU | BOLA2B | 30162932 | 10.9984 | 7.6753 | 1.2773  |
| CEU | BOLA2B | 30167932 | 11.0763 | 8.0164 | 1.1302  |
| CEU | BOLA2B | 30172932 | 6.1082  | 5.7991 | 0.1531  |
| CEU | BOLA2B | 30177932 | 5.7947  | 5.2874 | 0.2728  |
| CEU | BOLA2B | 30182932 | 6.173   | 5.7991 | 0.1852  |
| CEU | BOLA2B | 30187932 | 3.5114  | 5.1169 | -0.8887 |
| CEU | BOLA2B | 30192932 | 2.0614  | 5.458  | -1.7757 |
| CEU | BOLA2B | 30197932 | 2.4461  | 4.9463 | -1.4259 |
| CEU | BOLA2B | 30202932 | 1.1575  | 1.7056 | -0.7507 |
| CEU | BOLA2B | 30207932 | 0.0499  | 0.5117 | -1.4483 |
| CEU | BOLA2B | 30212932 | 0.1655  | 0.8528 | -1.5478 |
| CEU | BOLA2B | 30217932 | 0.1156  | 0.3411 | -0.904  |
| CEU | BOLA2B | 30222932 | 0.4937  | 0.5117 | -0.0565 |
| CEU | BOLA2B | 30227932 | 0.5038  | 0.6822 | -0.4659 |
| CEU | BOLA2B | 30232932 | 0.0303  | 0.3411 | -1.2459 |
| CEU | BOLA2B | 30237932 | 0.0202  | 0.1706 | -0.8934 |
| CEU | BOLA2B | 30242932 | 0       | 0      | 0       |
| CEU | BOLA2B | 30247932 | 0       | 0      | 0       |
| CEU | BOLA2B | 30252932 | 0       | 0      | 0       |
| CEU | BOLA2B | 30257932 | 0       | 0      | 0       |
| CEU | BOLA2B | 30262932 | 0.0499  | 0.3411 | -1.1673 |
| CEU | BOLA2B | 30267932 | 0.0802  | 0.8528 | -1.7399 |
| CEU | BOLA2B | 30272932 | 0.0404  | 0.6822 | -1.6759 |
| CEU | BOLA2B | 30277932 | 0.0101  | 0.1706 | -0.9534 |
| CEU | BOLA2B | 30282932 | 0.6151  | 0.5117 | 0.3243  |
| CEU | BOLA2B | 30287932 | 1.1631  | 0.8528 | 0.6988  |
| CEU | BOLA2B | 30292932 | 1.563   | 1.3645 | 0.3211  |
| CEU | BOLA2B | 30297932 | 1.0251  | 1.3645 | -0.5491 |
| CEU | BOLA2B | 30302932 | 0.5187  | 0.6822 | -0.4269 |
| CEU | BOLA2B | 30307932 | 1.0796  | 1.0234 | 0.1117  |
| CEU | BOLA2B | 30312932 | 1.0705  | 1.0234 | 0.0936  |
| CEU | BOLA2B | 30317932 | 1.5401  | 1.7056 | -0.2267 |

## 2\_TajimasD\_data

|     |        |          |        |        |         |
|-----|--------|----------|--------|--------|---------|
| CEU | BOLA2B | 30322932 | 3.9025 | 3.4112 | 0.3859  |
| CEU | BOLA2B | 30327932 | 6.5723 | 4.7757 | 1.0567  |
| CEU | BOLA2B | 30332932 | 7.122  | 6.4814 | 0.2871  |
| CEU | BOLA2B | 30337932 | 6.0561 | 6.3108 | -0.1169 |
| CEU | BOLA2B | 30342932 | 5.9314 | 6.1402 | -0.0983 |
| CEU | BOLA2B | 30347932 | 5.6988 | 6.9931 | -0.5416 |
| CEU | BOLA2B | 30352932 | 3.8633 | 5.9697 | -1.0166 |
| CEU | BOLA2B | 30357932 | 4.4385 | 5.458  | -0.533  |
| CEU | BOLA2B | 30362932 | 4.5203 | 5.9697 | -0.6995 |
| CEU | BOLA2B | 30367932 | 2.4444 | 4.4346 | -1.2487 |
| CEU | BOLA2B | 30372932 | 3.5529 | 4.6052 | -0.6389 |
| CEU | BOLA2B | 30377932 | 4.3673 | 6.6519 | -1.0002 |
| CEU | BOLA2B | 30382932 | 3.1472 | 6.1402 | -1.4084 |
| CEU | BOLA2B | 30387932 | 3.8813 | 4.9463 | -0.6074 |
| CEU | BOLA2B | 30392932 | 5.5545 | 5.9697 | -0.2004 |
| CEU | BOLA2B | 30397932 | 5.1973 | 7.3342 | -0.8562 |
| CEU | BOLA2B | 30402932 | 4.5143 | 6.9931 | -1.0372 |
| CEU | BOLA2B | 30407932 | 4.3781 | 5.6286 | -0.6361 |
| CEU | BOLA2B | 30412932 | 3.5121 | 3.5818 | -0.0525 |
| CEU | BOLA2B | 30417932 | 2.9031 | 2.5584 | 0.3434  |
| CEU | BOLA2B | 30422932 | 2.8409 | 2.5584 | 0.2814  |
| CEU | BOLA2B | 30427932 | 3.6755 | 3.0701 | 0.5193  |
| CEU | BOLA2B | 30432932 | 4.556  | 4.6052 | -0.0299 |
| CEU | BOLA2B | 30437932 | 3.9004 | 4.7757 | -0.5148 |
| CEU | BOLA2B | 30442932 | 3.7846 | 4.6052 | -0.4982 |
| CEU | BOLA2B | 30447932 | 4.5951 | 5.9697 | -0.6634 |
| CEU | BOLA2B | 30452932 | 3.5253 | 5.6286 | -1.0699 |
| CEU | BOLA2B | 30457932 | 4.691  | 6.4814 | -0.8025 |
| CEU | BOLA2B | 30462932 | 5.7695 | 5.9697 | -0.0966 |
| CEU | BOLA2B | 30467932 | 6.4686 | 5.9697 | 0.2408  |
| CEU | BOLA2B | 30472932 | 6.4395 | 7.5047 | -0.4179 |
| CEU | BOLA2B | 30477932 | 5.1342 | 6.6519 | -0.6645 |
| CEU | BOLA2B | 30482932 | 4.4842 | 5.1169 | -0.3502 |
| CEU | BOLA2B | 30487932 | 4.8275 | 4.6052 | 0.135   |
| CEU | BOLA2B | 30492932 | 7.0959 | 5.2874 | 0.9724  |
| CEU | BOLA2B | 30497932 | 7.697  | 5.6286 | 1.0521  |
| CEU | BOLA2B | 30502932 | 7.4463 | 6.6519 | 0.3478  |
| CEU | BOLA2B | 30507932 | 8.7965 | 6.9931 | 0.7546  |
| CEU | BOLA2B | 30512932 | 11.859 | 8.3576 | 1.2446  |
| CEU | BOLA2B | 30517932 | 9.7018 | 8.3576 | 0.4778  |
| CEU | BOLA2B | 30522932 | 4.2126 | 4.9463 | -0.4184 |
| CEU | BOLA2B | 30527932 | 2.7425 | 4.7757 | -1.1958 |
| CEU | BOLA2B | 30532932 | 3.1635 | 5.2874 | -1.142  |
| CEU | BOLA2B | 30537932 | 2.9225 | 3.0701 | -0.1266 |
| CEU | BOLA2B | 30542932 | 2.2358 | 3.2407 | -0.824  |
| CEU | BOLA2B | 30547932 | 3.4952 | 4.9463 | -0.8276 |
| CEU | BOLA2B | 30552932 | 4.9254 | 6.8225 | -0.8118 |
| CEU | BOLA2B | 30557932 | 4.0078 | 6.6519 | -1.1576 |
| CEU | BOLA2B | 30562932 | 2.1338 | 5.6286 | -1.7777 |

## 2\_TajimasD\_data

|     |        |          |         |         |         |
|-----|--------|----------|---------|---------|---------|
| CEU | BOLA2B | 30567932 | 1.6891  | 6.6519  | -2.1728 |
| CEU | BOLA2B | 30572932 | 1.8472  | 5.6286  | -1.9234 |
| CEU | BOLA2B | 30577932 | 1.4939  | 3.5818  | -1.5736 |
| CEU | BOLA2B | 30582932 | 1.9652  | 3.4112  | -1.1357 |
| CEU | BOLA2B | 30587932 | 3.0219  | 4.0935  | -0.7206 |
| CEU | BOLA2B | 30592932 | 2.616   | 4.6052  | -1.2077 |
| CEU | BOLA2B | 30597932 | 1.2773  | 4.0935  | -1.8937 |
| CEU | BOLA2B | 30602932 | 1.8159  | 3.4112  | -1.253  |
| CEU | BOLA2B | 30607932 | 2.0913  | 3.5818  | -1.1234 |
| CEU | BOLA2B | 30612932 | 2.4234  | 3.5818  | -0.8731 |
| CEU | BOLA2B | 30617932 | 1.9623  | 3.0701  | -0.9503 |
| CEU | BOLA2B | 30622932 | 1.9027  | 3.0701  | -1.0014 |
| CEU | BOLA2B | 30627932 | 2.3682  | 3.5818  | -0.9147 |
| CEU | BOLA2B | 30632932 | 4.6343  | 4.0935  | 0.3636  |
| CEU | BOLA2B | 30637932 | 6.1929  | 4.9463  | 0.7109  |
| CEU | BOLA2B | 30642932 | 8.9202  | 6.6519  | 0.9931  |
| CEU | BOLA2B | 30647932 | 10.5813 | 7.5047  | 1.2071  |
| CEU | BOLA2B | 30652932 | 5.6867  | 4.6052  | 0.6566  |
| CEU | BOLA2B | 30657932 | 2.3331  | 2.2173  | 0.1294  |
| CEU | BOLA2B | 30662932 | 1.6976  | 2.729   | -0.9749 |
| CEU | BOLA2B | 30667932 | 2.1855  | 2.8996  | -0.6422 |
| CEU | BOLA2B | 30672932 | 1.3896  | 3.0701  | -1.4415 |
| CEU | BOLA2B | 30677932 | 0.804   | 4.2641  | -2.2461 |
| CEU | BOLA2B | 30682932 | 1.5244  | 4.2641  | -1.7785 |
| CEU | BOLA2B | 30687932 | 2.0874  | 4.7757  | -1.5811 |
| CHB | BOLA2B | 29697932 | 5.4569  | 6.4378  | -0.441  |
| CHB | BOLA2B | 29702932 | 1.7933  | 5.2519  | -1.8653 |
| CHB | BOLA2B | 29707932 | 1.7976  | 6.0989  | -2.0304 |
| CHB | BOLA2B | 29712932 | 2.7579  | 7.4543  | -1.8486 |
| CHB | BOLA2B | 29717932 | 3.4298  | 10.1649 | -1.991  |
| CHB | BOLA2B | 29722932 | 3.9008  | 9.8261  | -1.8078 |
| CHB | BOLA2B | 29727932 | 2.8978  | 7.7931  | -1.8502 |
| CHB | BOLA2B | 29732932 | 2.5757  | 9.8261  | -2.2121 |
| CHB | BOLA2B | 29737932 | 2.9922  | 8.979   | -1.986  |
| CHB | BOLA2B | 29742932 | 3.0116  | 6.6072  | -1.5792 |
| CHB | BOLA2B | 29747932 | 5.9539  | 10.5037 | -1.3044 |
| CHB | BOLA2B | 29752932 | 5.4091  | 10.6731 | -1.4868 |
| CHB | BOLA2B | 29757932 | 2.4234  | 7.9625  | -2.0526 |
| CHB | BOLA2B | 29762932 | 4.806   | 10.3343 | -1.6092 |
| CHB | BOLA2B | 29767932 | 4.5374  | 10.3343 | -1.6874 |
| CHB | BOLA2B | 29772932 | 2.5315  | 10.5037 | -2.2856 |
| CHB | BOLA2B | 29777932 | 2.2644  | 10.3343 | -2.349  |
| CHB | BOLA2B | 29782932 | 2.0792  | 5.9295  | -1.864  |
| CHB | BOLA2B | 29787932 | 3.6156  | 7.4543  | -1.511  |
| CHB | BOLA2B | 29792932 | 3.558   | 9.4872  | -1.869  |
| CHB | BOLA2B | 29797932 | 1.8597  | 7.6237  | -2.2228 |
| CHB | BOLA2B | 29802932 | 1.1159  | 6.4378  | -2.3929 |
| CHB | BOLA2B | 29807932 | 0.9122  | 4.2354  | -2.1634 |
| CHB | BOLA2B | 29812932 | 1.0445  | 4.7436  | -2.182  |

## 2\_TajimasD\_data

|     |        |          |        |        |         |
|-----|--------|----------|--------|--------|---------|
| CHB | BOLA2B | 29817932 | 1.2545 | 6.7766 | -2.3704 |
| CHB | BOLA2B | 29822932 | 1.5635 | 6.946  | -2.2594 |
| CHB | BOLA2B | 29827932 | 2.3322 | 7.2848 | -1.9908 |
| CHB | BOLA2B | 29832932 | 3.0423 | 6.6072 | -1.5657 |
| CHB | BOLA2B | 29837932 | 3.1942 | 6.4378 | -1.4584 |
| CHB | BOLA2B | 29842932 | 2.268  | 6.2684 | -1.8424 |
| CHB | BOLA2B | 29847932 | 1.7245 | 5.4213 | -1.9385 |
| CHB | BOLA2B | 29852932 | 1.5599 | 6.0989 | -2.1426 |
| CHB | BOLA2B | 29857932 | 1.7855 | 6.7766 | -2.1425 |
| CHB | BOLA2B | 29862932 | 2.5854 | 7.4543 | -1.9165 |
| CHB | BOLA2B | 29867932 | 2.1047 | 6.2684 | -1.9177 |
| CHB | BOLA2B | 29872932 | 1.9429 | 6.0989 | -1.9618 |
| CHB | BOLA2B | 29877932 | 2.7341 | 6.7766 | -1.7353 |
| CHB | BOLA2B | 29882932 | 4.3257 | 5.9295 | -0.7764 |
| CHB | BOLA2B | 29887932 | 4.2983 | 5.2519 | -0.5143 |
| CHB | BOLA2B | 29892932 | 5.4059 | 5.5907 | -0.0943 |
| CHB | BOLA2B | 29897932 | 7.8932 | 5.9295 | 0.9507  |
| CHB | BOLA2B | 29902932 | 7.3587 | 5.9295 | 0.6919  |
| CHB | BOLA2B | 29907932 | 8.0162 | 6.6072 | 0.6188  |
| CHB | BOLA2B | 29912932 | 7.1456 | 5.9295 | 0.5887  |
| CHB | BOLA2B | 29917932 | 5.3476 | 5.7601 | -0.2049 |
| CHB | BOLA2B | 29922932 | 5.9558 | 6.7766 | -0.3523 |
| CHB | BOLA2B | 29927932 | 6.4498 | 6.7766 | -0.1403 |
| CHB | BOLA2B | 29932932 | 7.7044 | 7.9625 | -0.0956 |
| CHB | BOLA2B | 29937932 | 6.7487 | 6.7766 | -0.012  |
| CHB | BOLA2B | 29942932 | 5.8843 | 5.2519 | 0.3411  |
| CHB | BOLA2B | 29947932 | 5.288  | 6.0989 | -0.3828 |
| CHB | BOLA2B | 29952932 | 2.9143 | 5.9295 | -1.4597 |
| CHB | BOLA2B | 29957932 | 3.9006 | 6.6072 | -1.1888 |
| CHB | BOLA2B | 29962932 | 5.1532 | 5.7601 | -0.3015 |
| CHB | BOLA2B | 29967932 | 6.331  | 5.2519 | 0.582   |
| CHB | BOLA2B | 29972932 | 5.553  | 4.913  | 0.3661  |
| CHB | BOLA2B | 29977932 | 6.186  | 4.913  | 0.7282  |
| CHB | BOLA2B | 29982932 | 8.134  | 5.5907 | 1.2976  |
| CHB | BOLA2B | 29987932 | 4.6351 | 4.4048 | 0.1449  |
| CHB | BOLA2B | 29992932 | 4.7342 | 5.7601 | -0.5097 |
| CHB | BOLA2B | 29997932 | 5.2324 | 6.0989 | -0.409  |
| CHB | BOLA2B | 30002932 | 2.8117 | 4.7436 | -1.1396 |
| CHB | BOLA2B | 30007932 | 3.2315 | 5.5907 | -1.2037 |
| CHB | BOLA2B | 30012932 | 6.1112 | 8.1319 | -0.7345 |
| CHB | BOLA2B | 30017932 | 6.8892 | 8.6402 | -0.6019 |
| CHB | BOLA2B | 30022932 | 6.324  | 6.2684 | 0.0256  |
| CHB | BOLA2B | 30027932 | 6.3082 | 4.913  | 0.7981  |
| CHB | BOLA2B | 30032932 | 6.1108 | 5.4213 | 0.3616  |
| CHB | BOLA2B | 30037932 | 7.321  | 7.1154 | 0.0844  |
| CHB | BOLA2B | 30042932 | 8.0902 | 6.7766 | 0.5639  |
| CHB | BOLA2B | 30047932 | 8.1826 | 7.1154 | 0.4383  |
| CHB | BOLA2B | 30052932 | 6.1481 | 7.7931 | -0.6217 |
| CHB | BOLA2B | 30057932 | 4.1519 | 6.2684 | -0.9748 |

## 2\_TajimasD\_data

|     |        |          |        |        |         |
|-----|--------|----------|--------|--------|---------|
| CHB | BOLA2B | 30062932 | 4.7149 | 6.4378 | -0.7747 |
| CHB | BOLA2B | 30067932 | 4.7105 | 7.2848 | -1.0348 |
| CHB | BOLA2B | 30072932 | 2.9309 | 6.0989 | -1.4954 |
| CHB | BOLA2B | 30077932 | 3.0192 | 7.6237 | -1.7756 |
| CHB | BOLA2B | 30082932 | 2.7927 | 7.4543 | -1.8349 |
| CHB | BOLA2B | 30087932 | 2.5243 | 5.5907 | -1.5645 |
| CHB | BOLA2B | 30092932 | 5.1536 | 8.1319 | -1.0825 |
| CHB | BOLA2B | 30097932 | 5.008  | 7.1154 | -0.8654 |
| CHB | BOLA2B | 30102932 | 3.744  | 4.2354 | -0.3199 |
| CHB | BOLA2B | 30107932 | 3.1296 | 5.4213 | -1.2017 |
| CHB | BOLA2B | 30112932 | 2.0714 | 5.7601 | -1.8326 |
| CHB | BOLA2B | 30117932 | 5.2968 | 7.9625 | -0.9878 |
| CHB | BOLA2B | 30122932 | 5.7278 | 8.4708 | -0.9602 |
| CHB | BOLA2B | 30127932 | 2.7849 | 5.0825 | -1.2756 |
| CHB | BOLA2B | 30132932 | 3.7552 | 4.5742 | -0.4987 |
| CHB | BOLA2B | 30137932 | 6.8468 | 6.2684 | 0.2664  |
| CHB | BOLA2B | 30142932 | 6.1685 | 6.946  | -0.3264 |
| CHB | BOLA2B | 30147932 | 2.5799 | 5.4213 | -1.4899 |
| CHB | BOLA2B | 30152932 | 3.6164 | 6.0989 | -1.1718 |
| CHB | BOLA2B | 30157932 | 5.4517 | 7.1154 | -0.6832 |
| CHB | BOLA2B | 30162932 | 8.478  | 7.4543 | 0.403   |
| CHB | BOLA2B | 30167932 | 8.1498 | 6.946  | 0.5053  |
| CHB | BOLA2B | 30172932 | 4.4786 | 6.2684 | -0.8243 |
| CHB | BOLA2B | 30177932 | 4.8951 | 7.1154 | -0.9118 |
| CHB | BOLA2B | 30182932 | 5.0044 | 7.1154 | -0.8669 |
| CHB | BOLA2B | 30187932 | 3.0038 | 6.946  | -1.6548 |
| CHB | BOLA2B | 30192932 | 1.218  | 5.5907 | -2.231  |
| CHB | BOLA2B | 30197932 | 1.2254 | 3.7271 | -1.8174 |
| CHB | BOLA2B | 30202932 | 0.8251 | 1.6942 | -1.1927 |
| CHB | BOLA2B | 30207932 | 0.0097 | 0.1694 | -0.949  |
| CHB | BOLA2B | 30212932 | 0.0386 | 0.3388 | -1.2042 |
| CHB | BOLA2B | 30217932 | 0.0386 | 0.3388 | -1.2042 |
| CHB | BOLA2B | 30222932 | 0.1542 | 0.3388 | -0.7405 |
| CHB | BOLA2B | 30227932 | 0.1445 | 0.1694 | -0.148  |
| CHB | BOLA2B | 30232932 | 0.0192 | 0.1694 | -0.8925 |
| CHB | BOLA2B | 30237932 | 0.0192 | 0.1694 | -0.8925 |
| CHB | BOLA2B | 30242932 | 0      | 0      | 0       |
| CHB | BOLA2B | 30247932 | 0      | 0      | 0       |
| CHB | BOLA2B | 30252932 | 0      | 0      | 0       |
| CHB | BOLA2B | 30257932 | 0      | 0      | 0       |
| CHB | BOLA2B | 30262932 | 0.1277 | 0.1694 | -0.2478 |
| CHB | BOLA2B | 30267932 | 0.1472 | 0.5082 | -1.1332 |
| CHB | BOLA2B | 30272932 | 0.0194 | 0.3388 | -1.2812 |
| CHB | BOLA2B | 30277932 | 0      | 0      | 0       |
| CHB | BOLA2B | 30282932 | 0.5635 | 0.6777 | -0.2986 |
| CHB | BOLA2B | 30287932 | 0.8327 | 1.3553 | -0.847  |
| CHB | BOLA2B | 30292932 | 0.7049 | 2.2024 | -1.6768 |
| CHB | BOLA2B | 30297932 | 0.4455 | 1.8636 | -1.8093 |
| CHB | BOLA2B | 30302932 | 0.1776 | 1.1859 | -1.7998 |

## 2\_TajimasD\_data

|     |        |          |        |        |         |
|-----|--------|----------|--------|--------|---------|
| CHB | BOLA2B | 30307932 | 0.3954 | 2.5412 | -2.1427 |
| CHB | BOLA2B | 30312932 | 0.4217 | 2.3718 | -2.0585 |
| CHB | BOLA2B | 30317932 | 0.4287 | 1.5247 | -1.6283 |
| CHB | BOLA2B | 30322932 | 1.6657 | 5.2519 | -1.9342 |
| CHB | BOLA2B | 30327932 | 2.9103 | 7.6237 | -1.8176 |
| CHB | BOLA2B | 30332932 | 2.578  | 6.6072 | -1.7697 |
| CHB | BOLA2B | 30337932 | 2.0346 | 6.946  | -2.0616 |
| CHB | BOLA2B | 30342932 | 2.3362 | 6.0989 | -1.7762 |
| CHB | BOLA2B | 30347932 | 2.107  | 5.9295 | -1.8505 |
| CHB | BOLA2B | 30352932 | 2.0278 | 5.2519 | -1.7389 |
| CHB | BOLA2B | 30357932 | 2.5115 | 5.2519 | -1.478  |
| CHB | BOLA2B | 30362932 | 1.6722 | 6.946  | -2.2137 |
| CHB | BOLA2B | 30367932 | 0.7101 | 5.7601 | -2.509  |
| CHB | BOLA2B | 30372932 | 1.1123 | 5.4213 | -2.2595 |
| CHB | BOLA2B | 30377932 | 1.7704 | 6.2684 | -2.0716 |
| CHB | BOLA2B | 30382932 | 1.4734 | 5.2519 | -2.0379 |
| CHB | BOLA2B | 30387932 | 1.5252 | 5.4213 | -2.043  |
| CHB | BOLA2B | 30392932 | 1.8525 | 6.7766 | -2.1137 |
| CHB | BOLA2B | 30397932 | 1.7729 | 6.946  | -2.1715 |
| CHB | BOLA2B | 30402932 | 1.4795 | 5.5907 | -2.0976 |
| CHB | BOLA2B | 30407932 | 1.3122 | 4.066  | -1.857  |
| CHB | BOLA2B | 30412932 | 1.2675 | 3.3883 | -1.6702 |
| CHB | BOLA2B | 30417932 | 1.0729 | 4.066  | -2.0183 |
| CHB | BOLA2B | 30422932 | 1.4047 | 4.913  | -2.0067 |
| CHB | BOLA2B | 30427932 | 1.8624 | 4.5742 | -1.6513 |
| CHB | BOLA2B | 30432932 | 2.4963 | 4.7436 | -1.3256 |
| CHB | BOLA2B | 30437932 | 2.4727 | 5.5907 | -1.5909 |
| CHB | BOLA2B | 30442932 | 1.6846 | 7.4543 | -2.2711 |
| CHB | BOLA2B | 30447932 | 2.2596 | 8.979  | -2.229  |
| CHB | BOLA2B | 30452932 | 2.4168 | 7.7931 | -2.032  |
| CHB | BOLA2B | 30457932 | 2.3137 | 6.7766 | -1.9158 |
| CHB | BOLA2B | 30462932 | 2.6204 | 6.946  | -1.8157 |
| CHB | BOLA2B | 30467932 | 2.2749 | 7.2848 | -2.0138 |
| CHB | BOLA2B | 30472932 | 1.3552 | 6.2684 | -2.2628 |
| CHB | BOLA2B | 30477932 | 1.2168 | 4.066  | -1.9213 |
| CHB | BOLA2B | 30482932 | 1.3301 | 4.066  | -1.8449 |
| CHB | BOLA2B | 30487932 | 2.8028 | 6.4378 | -1.6344 |
| CHB | BOLA2B | 30492932 | 4.1907 | 9.3178 | -1.6434 |
| CHB | BOLA2B | 30497932 | 4.657  | 8.8096 | -1.402  |
| CHB | BOLA2B | 30502932 | 4.6292 | 7.4543 | -1.112  |
| CHB | BOLA2B | 30507932 | 4.8841 | 6.7766 | -0.8124 |
| CHB | BOLA2B | 30512932 | 7.2381 | 8.4708 | -0.4315 |
| CHB | BOLA2B | 30517932 | 5.1472 | 8.3013 | -1.1249 |
| CHB | BOLA2B | 30522932 | 2.1032 | 4.7436 | -1.5575 |
| CHB | BOLA2B | 30527932 | 1.5399 | 4.066  | -1.7034 |
| CHB | BOLA2B | 30532932 | 0.8532 | 4.4048 | -2.2348 |
| CHB | BOLA2B | 30537932 | 0.7971 | 4.2354 | -2.2383 |
| CHB | BOLA2B | 30542932 | 0.5378 | 3.7271 | -2.317  |
| CHB | BOLA2B | 30547932 | 0.853  | 5.2519 | -2.3725 |



## 2\_TajimasD\_data

|     |        |          |         |         |         |
|-----|--------|----------|---------|---------|---------|
| CHB | BOLA2B | 30552932 | 1.7537  | 6.0989  | -2.0511 |
| CHB | BOLA2B | 30557932 | 1.4194  | 5.7601  | -2.1566 |
| CHB | BOLA2B | 30562932 | 0.7472  | 5.7601  | -2.4905 |
| CHB | BOLA2B | 30567932 | 0.8348  | 5.7601  | -2.447  |
| CHB | BOLA2B | 30572932 | 0.6063  | 4.5742  | -2.4161 |
| CHB | BOLA2B | 30577932 | 0.861   | 5.2519  | -2.3682 |
| CHB | BOLA2B | 30582932 | 1.2104  | 6.2684  | -2.3295 |
| CHB | BOLA2B | 30587932 | 1.47    | 5.5907  | -2.1025 |
| CHB | BOLA2B | 30592932 | 1.1401  | 5.2519  | -2.2176 |
| CHB | BOLA2B | 30597932 | 0.5673  | 3.8965  | -2.3285 |
| CHB | BOLA2B | 30602932 | 0.7773  | 4.4048  | -2.2826 |
| CHB | BOLA2B | 30607932 | 0.7188  | 4.066   | -2.2571 |
| CHB | BOLA2B | 30612932 | 1.4436  | 5.5907  | -2.1159 |
| CHB | BOLA2B | 30617932 | 1.3459  | 5.7601  | -2.1931 |
| CHB | BOLA2B | 30622932 | 0.9259  | 5.5907  | -2.3801 |
| CHB | BOLA2B | 30627932 | 1.3588  | 6.2684  | -2.2612 |
| CHB | BOLA2B | 30632932 | 2.4089  | 6.2684  | -1.7775 |
| CHB | BOLA2B | 30637932 | 3.012   | 6.6072  | -1.5791 |
| CHB | BOLA2B | 30642932 | 3.7733  | 5.9295  | -1.0438 |
| CHB | BOLA2B | 30647932 | 5.0596  | 6.6072  | -0.6797 |
| CHB | BOLA2B | 30652932 | 3.1131  | 5.2519  | -1.1535 |
| CHB | BOLA2B | 30657932 | 0.8782  | 4.2354  | -2.1855 |
| CHB | BOLA2B | 30662932 | 1.1713  | 5.0825  | -2.1714 |
| CHB | BOLA2B | 30667932 | 1.506   | 6.2684  | -2.1934 |
| CHB | BOLA2B | 30672932 | 0.8713  | 5.7601  | -2.4289 |
| CHB | BOLA2B | 30677932 | 0.763   | 4.066   | -2.2273 |
| CHB | BOLA2B | 30682932 | 0.906   | 4.2354  | -2.1674 |
| CHB | BOLA2B | 30687932 | 1.0583  | 5.0825  | -2.2342 |
| YRI | BOLA2B | 29697932 | 6.9224  | 11.7644 | -1.2439 |
| YRI | BOLA2B | 29702932 | 4.4302  | 10.2518 | -1.7015 |
| YRI | BOLA2B | 29707932 | 3.5209  | 8.9073  | -1.794  |
| YRI | BOLA2B | 29712932 | 5.9979  | 12.1005 | -1.5267 |
| YRI | BOLA2B | 29717932 | 7.4137  | 13.1089 | -1.3211 |
| YRI | BOLA2B | 29722932 | 7.5865  | 10.756  | -0.8857 |
| YRI | BOLA2B | 29727932 | 7.8907  | 12.1005 | -1.0532 |
| YRI | BOLA2B | 29732932 | 9.6737  | 14.1172 | -0.9608 |
| YRI | BOLA2B | 29737932 | 8.3473  | 11.4282 | -0.8134 |
| YRI | BOLA2B | 29742932 | 7.8548  | 8.9073  | -0.3505 |
| YRI | BOLA2B | 29747932 | 17.295  | 14.2853 | 0.6435  |
| YRI | BOLA2B | 29752932 | 19.2376 | 15.7978 | 0.6682  |
| YRI | BOLA2B | 29757932 | 13.0797 | 12.9408 | 0.0326  |
| YRI | BOLA2B | 29762932 | 15.2446 | 13.9492 | 0.2833  |
| YRI | BOLA2B | 29767932 | 14.3692 | 15.4617 | -0.2166 |
| YRI | BOLA2B | 29772932 | 15.5751 | 16.4701 | -0.1671 |
| YRI | BOLA2B | 29777932 | 15.6639 | 15.2937 | 0.0742  |
| YRI | BOLA2B | 29782932 | 9.2227  | 12.2685 | -0.7522 |
| YRI | BOLA2B | 29787932 | 13.4678 | 11.5963 | 0.4873  |
| YRI | BOLA2B | 29792932 | 13.429  | 10.2518 | 0.9286  |
| YRI | BOLA2B | 29797932 | 6.3555  | 7.8989  | -0.5742 |

## 2\_TajimasD\_data

|     |        |          |         |         |         |
|-----|--------|----------|---------|---------|---------|
| YRI | BOLA2B | 29802932 | 3.9357  | 7.8989  | -1.4744 |
| YRI | BOLA2B | 29807932 | 3.4297  | 8.4031  | -1.748  |
| YRI | BOLA2B | 29812932 | 3.7304  | 9.5795  | -1.821  |
| YRI | BOLA2B | 29817932 | 4.4151  | 11.7644 | -1.8881 |
| YRI | BOLA2B | 29822932 | 5.1187  | 12.1005 | -1.7467 |
| YRI | BOLA2B | 29827932 | 6.4279  | 10.756  | -1.2095 |
| YRI | BOLA2B | 29832932 | 8.6355  | 12.9408 | -1.0109 |
| YRI | BOLA2B | 29837932 | 8.8255  | 12.9408 | -0.9663 |
| YRI | BOLA2B | 29842932 | 5.5425  | 7.3947  | -0.7319 |
| YRI | BOLA2B | 29847932 | 4.3567  | 6.2183  | -0.8606 |
| YRI | BOLA2B | 29852932 | 4.5801  | 8.7392  | -1.4098 |
| YRI | BOLA2B | 29857932 | 5.3703  | 10.0837 | -1.399  |
| YRI | BOLA2B | 29862932 | 7.4745  | 11.7644 | -1.1021 |
| YRI | BOLA2B | 29867932 | 6.2497  | 10.2518 | -1.1697 |
| YRI | BOLA2B | 29872932 | 5.0374  | 10.4199 | -1.5495 |
| YRI | BOLA2B | 29877932 | 7.0135  | 12.6047 | -1.346  |
| YRI | BOLA2B | 29882932 | 7.8122  | 10.0837 | -0.6742 |
| YRI | BOLA2B | 29887932 | 6.0021  | 8.9073  | -0.9676 |
| YRI | BOLA2B | 29892932 | 7.5091  | 9.7476  | -0.6857 |
| YRI | BOLA2B | 29897932 | 8.4594  | 9.7476  | -0.3946 |
| YRI | BOLA2B | 29902932 | 7.6085  | 9.5795  | -0.6136 |
| YRI | BOLA2B | 29907932 | 9.7092  | 10.4199 | -0.2046 |
| YRI | BOLA2B | 29912932 | 7.4686  | 8.4031  | -0.3284 |
| YRI | BOLA2B | 29917932 | 5.3455  | 7.2267  | -0.7591 |
| YRI | BOLA2B | 29922932 | 6.8697  | 8.5712  | -0.5872 |
| YRI | BOLA2B | 29927932 | 8.0026  | 9.4115  | -0.4459 |
| YRI | BOLA2B | 29932932 | 9.5601  | 11.0921 | -0.4159 |
| YRI | BOLA2B | 29937932 | 8.5884  | 8.7392  | -0.0511 |
| YRI | BOLA2B | 29942932 | 8.506   | 7.3947  | 0.4391  |
| YRI | BOLA2B | 29947932 | 7.9013  | 8.9073  | -0.3351 |
| YRI | BOLA2B | 29952932 | 5.4524  | 7.7309  | -0.8645 |
| YRI | BOLA2B | 29957932 | 5.9645  | 8.235   | -0.813  |
| YRI | BOLA2B | 29962932 | 5.782   | 8.235   | -0.8783 |
| YRI | BOLA2B | 29967932 | 7.2169  | 8.7392  | -0.516  |
| YRI | BOLA2B | 29972932 | 7.2754  | 9.0754  | -0.5892 |
| YRI | BOLA2B | 29977932 | 6.1289  | 7.8989  | -0.6585 |
| YRI | BOLA2B | 29982932 | 7.7577  | 9.2434  | -0.4781 |
| YRI | BOLA2B | 29987932 | 5.6971  | 8.067   | -0.8648 |
| YRI | BOLA2B | 29992932 | 5.4564  | 7.3947  | -0.7659 |
| YRI | BOLA2B | 29997932 | 5.7732  | 7.7309  | -0.7428 |
| YRI | BOLA2B | 30002932 | 4.0994  | 7.2267  | -1.2619 |
| YRI | BOLA2B | 30007932 | 6.8775  | 8.7392  | -0.6311 |
| YRI | BOLA2B | 30012932 | 10.7363 | 10.756  | -0.0055 |
| YRI | BOLA2B | 30017932 | 8.8666  | 9.0754  | -0.0683 |
| YRI | BOLA2B | 30022932 | 6.1231  | 6.8906  | -0.3234 |
| YRI | BOLA2B | 30027932 | 6.4209  | 8.235   | -0.6495 |
| YRI | BOLA2B | 30032932 | 7.3274  | 9.7476  | -0.7414 |
| YRI | BOLA2B | 30037932 | 7.9888  | 9.2434  | -0.4038 |
| YRI | BOLA2B | 30042932 | 8.7323  | 9.0754  | -0.1123 |

## 2\_TajimasD\_data

|     |        |          |         |         |         |
|-----|--------|----------|---------|---------|---------|
| YRI | BOLA2B | 30047932 | 9.5965  | 10.2518 | -0.1915 |
| YRI | BOLA2B | 30052932 | 9.1369  | 11.5963 | -0.6404 |
| YRI | BOLA2B | 30057932 | 8.4659  | 12.7727 | -1.0239 |
| YRI | BOLA2B | 30062932 | 7.6134  | 12.4366 | -1.1759 |
| YRI | BOLA2B | 30067932 | 6.068   | 10.2518 | -1.2228 |
| YRI | BOLA2B | 30072932 | 3.1724  | 8.4031  | -1.8384 |
| YRI | BOLA2B | 30077932 | 3.9363  | 10.0837 | -1.8246 |
| YRI | BOLA2B | 30082932 | 5.2799  | 9.9157  | -1.3977 |
| YRI | BOLA2B | 30087932 | 5.3808  | 9.5795  | -1.3072 |
| YRI | BOLA2B | 30092932 | 7.258   | 11.7644 | -1.1577 |
| YRI | BOLA2B | 30097932 | 5.5376  | 9.9157  | -1.32   |
| YRI | BOLA2B | 30102932 | 3.422   | 6.8906  | -1.4616 |
| YRI | BOLA2B | 30107932 | 3.5171  | 8.4031  | -1.7172 |
| YRI | BOLA2B | 30112932 | 3.9093  | 8.9073  | -1.6646 |
| YRI | BOLA2B | 30117932 | 7.9391  | 9.9157  | -0.5959 |
| YRI | BOLA2B | 30122932 | 8.4192  | 10.2518 | -0.5356 |
| YRI | BOLA2B | 30127932 | 5.1009  | 9.2434  | -1.3332 |
| YRI | BOLA2B | 30132932 | 4.6229  | 8.235   | -1.2933 |
| YRI | BOLA2B | 30137932 | 7.6366  | 9.7476  | -0.6467 |
| YRI | BOLA2B | 30142932 | 7.6856  | 9.5795  | -0.5896 |
| YRI | BOLA2B | 30147932 | 2.9103  | 4.7057  | -1.0628 |
| YRI | BOLA2B | 30152932 | 5.1925  | 6.8906  | -0.7155 |
| YRI | BOLA2B | 30157932 | 8.7311  | 8.7392  | -0.0027 |
| YRI | BOLA2B | 30162932 | 12.4587 | 8.7392  | 1.2608  |
| YRI | BOLA2B | 30167932 | 12.8313 | 8.9073  | 1.3069  |
| YRI | BOLA2B | 30172932 | 8.1155  | 6.7225  | 0.6002  |
| YRI | BOLA2B | 30177932 | 8.4006  | 6.7225  | 0.7231  |
| YRI | BOLA2B | 30182932 | 9.116   | 7.5628  | 0.6013  |
| YRI | BOLA2B | 30187932 | 6.6339  | 6.3864  | 0.1117  |
| YRI | BOLA2B | 30192932 | 3.5185  | 6.5544  | -1.3385 |
| YRI | BOLA2B | 30197932 | 2.5482  | 5.8822  | -1.62   |
| YRI | BOLA2B | 30202932 | 1.4488  | 2.0167  | -0.679  |
| YRI | BOLA2B | 30207932 | 0.179   | 0.6722  | -1.2912 |
| YRI | BOLA2B | 30212932 | 0.2158  | 1.1764  | -1.7181 |
| YRI | BOLA2B | 30217932 | 0.0369  | 0.5042  | -1.4686 |
| YRI | BOLA2B | 30222932 | 0.5038  | 0.1681  | 1.9956  |
| YRI | BOLA2B | 30227932 | 0.5038  | 0.1681  | 1.9956  |
| YRI | BOLA2B | 30232932 | 0.0369  | 0.5042  | -1.4686 |
| YRI | BOLA2B | 30237932 | 0.0369  | 0.5042  | -1.4686 |
| YRI | BOLA2B | 30242932 | 0.0093  | 0.1681  | -0.944  |
| YRI | BOLA2B | 30247932 | 0.0093  | 0.1681  | -0.944  |
| YRI | BOLA2B | 30252932 | 0       | 0       | 0       |
| YRI | BOLA2B | 30257932 | 0       | 0       | 0       |
| YRI | BOLA2B | 30262932 | 0.1966  | 0.8403  | -1.4539 |
| YRI | BOLA2B | 30267932 | 0.2059  | 1.0084  | -1.5999 |
| YRI | BOLA2B | 30272932 | 0.0093  | 0.1681  | -0.944  |
| YRI | BOLA2B | 30277932 | 0.0891  | 0.1681  | -0.4696 |
| YRI | BOLA2B | 30282932 | 1.1364  | 1.1764  | -0.0715 |
| YRI | BOLA2B | 30287932 | 2.3186  | 2.3529  | -0.0363 |

## 2\_TajimasD\_data

|     |        |          |         |         |         |
|-----|--------|----------|---------|---------|---------|
| YRI | BOLA2B | 30292932 | 4.2576  | 3.1932  | 0.8778  |
| YRI | BOLA2B | 30297932 | 3.5639  | 3.1932  | 0.3057  |
| YRI | BOLA2B | 30302932 | 1.1959  | 2.3529  | -1.2247 |
| YRI | BOLA2B | 30307932 | 1.4368  | 3.1932  | -1.4485 |
| YRI | BOLA2B | 30312932 | 1.3584  | 2.689   | -1.2646 |
| YRI | BOLA2B | 30317932 | 1.4136  | 3.1932  | -1.4677 |
| YRI | BOLA2B | 30322932 | 3.4273  | 7.8989  | -1.6635 |
| YRI | BOLA2B | 30327932 | 6.2004  | 9.2434  | -0.9793 |
| YRI | BOLA2B | 30332932 | 7.4818  | 8.235   | -0.2697 |
| YRI | BOLA2B | 30337932 | 6.2683  | 6.8906  | -0.2622 |
| YRI | BOLA2B | 30342932 | 5.5157  | 6.3864  | -0.393  |
| YRI | BOLA2B | 30347932 | 6.265   | 9.0754  | -0.92   |
| YRI | BOLA2B | 30352932 | 4.1088  | 7.5628  | -1.3371 |
| YRI | BOLA2B | 30357932 | 3.5727  | 6.8906  | -1.3981 |
| YRI | BOLA2B | 30362932 | 4.5209  | 9.2434  | -1.5198 |
| YRI | BOLA2B | 30367932 | 3.1575  | 7.2267  | -1.642  |
| YRI | BOLA2B | 30372932 | 3.7059  | 6.8906  | -1.3419 |
| YRI | BOLA2B | 30377932 | 4.7209  | 8.5712  | -1.3288 |
| YRI | BOLA2B | 30382932 | 4.6663  | 6.7225  | -0.886  |
| YRI | BOLA2B | 30387932 | 4.5275  | 5.378   | -0.4476 |
| YRI | BOLA2B | 30392932 | 6.178   | 6.5544  | -0.1659 |
| YRI | BOLA2B | 30397932 | 6.8902  | 8.235   | -0.4815 |
| YRI | BOLA2B | 30402932 | 5.1051  | 9.7476  | -1.4222 |
| YRI | BOLA2B | 30407932 | 4.8265  | 8.9073  | -1.3591 |
| YRI | BOLA2B | 30412932 | 5.5518  | 7.8989  | -0.8732 |
| YRI | BOLA2B | 30417932 | 5.0927  | 6.3864  | -0.5839 |
| YRI | BOLA2B | 30422932 | 4.2249  | 5.0419  | -0.4552 |
| YRI | BOLA2B | 30427932 | 3.585   | 6.0502  | -1.168  |
| YRI | BOLA2B | 30432932 | 4.3761  | 7.3947  | -1.1928 |
| YRI | BOLA2B | 30437932 | 4.416   | 7.2267  | -1.1342 |
| YRI | BOLA2B | 30442932 | 5.105   | 8.235   | -1.1207 |
| YRI | BOLA2B | 30447932 | 6.26    | 10.4199 | -1.1975 |
| YRI | BOLA2B | 30452932 | 4.7342  | 9.9157  | -1.5622 |
| YRI | BOLA2B | 30457932 | 5.7299  | 9.5795  | -1.1985 |
| YRI | BOLA2B | 30462932 | 5.4928  | 8.235   | -0.9819 |
| YRI | BOLA2B | 30467932 | 6.5706  | 9.9157  | -1.0086 |
| YRI | BOLA2B | 30472932 | 6.8964  | 11.0921 | -1.1392 |
| YRI | BOLA2B | 30477932 | 4.1288  | 7.7309  | -1.3667 |
| YRI | BOLA2B | 30482932 | 3.946   | 7.2267  | -1.3238 |
| YRI | BOLA2B | 30487932 | 6.4597  | 9.2434  | -0.8959 |
| YRI | BOLA2B | 30492932 | 9.7429  | 11.2602 | -0.4062 |
| YRI | BOLA2B | 30497932 | 8.2834  | 11.0921 | -0.7626 |
| YRI | BOLA2B | 30502932 | 7.2494  | 10.2518 | -0.8775 |
| YRI | BOLA2B | 30507932 | 9.5566  | 10.0837 | -0.1565 |
| YRI | BOLA2B | 30512932 | 12.5506 | 12.9408 | -0.0916 |
| YRI | BOLA2B | 30517932 | 10.3835 | 12.9408 | -0.6005 |
| YRI | BOLA2B | 30522932 | 5.1796  | 9.0754  | -1.2753 |
| YRI | BOLA2B | 30527932 | 3.7164  | 7.3947  | -1.4535 |
| YRI | BOLA2B | 30532932 | 4.2996  | 8.4031  | -1.4422 |

2\_TajimasD\_data

|     |        |          |        |         |         |
|-----|--------|----------|--------|---------|---------|
| YRI | BOLA2B | 30537932 | 4.9755 | 11.4282 | -1.7035 |
| YRI | BOLA2B | 30542932 | 4.1284 | 9.2434  | -1.6461 |
| YRI | BOLA2B | 30547932 | 3.7779 | 9.0754  | -1.7341 |
| YRI | BOLA2B | 30552932 | 4.0229 | 9.4115  | -1.7055 |
| YRI | BOLA2B | 30557932 | 4.0824 | 9.0754  | -1.6344 |
| YRI | BOLA2B | 30562932 | 3.5981 | 10.0837 | -1.925  |
| YRI | BOLA2B | 30567932 | 4.0997 | 10.2518 | -1.7981 |
| YRI | BOLA2B | 30572932 | 4.1331 | 9.2434  | -1.6446 |
| YRI | BOLA2B | 30577932 | 2.8454 | 5.8822  | -1.4756 |
| YRI | BOLA2B | 30582932 | 2.8675 | 6.5544  | -1.6255 |
| YRI | BOLA2B | 30587932 | 5.2471 | 8.4031  | -1.1092 |
| YRI | BOLA2B | 30592932 | 6.5814 | 9.5795  | -0.9334 |
| YRI | BOLA2B | 30597932 | 4.9406 | 8.4031  | -1.2169 |
| YRI | BOLA2B | 30602932 | 5.74   | 6.8906  | -0.4848 |
| YRI | BOLA2B | 30607932 | 5.3662 | 5.7141  | -0.1735 |
| YRI | BOLA2B | 30612932 | 6.0883 | 7.3947  | -0.5162 |
| YRI | BOLA2B | 30617932 | 5.8476 | 8.4031  | -0.8982 |
| YRI | BOLA2B | 30622932 | 5.0517 | 7.5628  | -0.9721 |
| YRI | BOLA2B | 30627932 | 4.9049 | 9.0754  | -1.3652 |
| YRI | BOLA2B | 30632932 | 5.5298 | 10.756  | -1.4604 |
| YRI | BOLA2B | 30637932 | 6.8328 | 9.4115  | -0.8161 |
| YRI | BOLA2B | 30642932 | 7.4871 | 8.4031  | -0.3219 |
| YRI | BOLA2B | 30647932 | 9.6902 | 10.924  | -0.3398 |
| YRI | BOLA2B | 30652932 | 6.8228 | 9.0754  | -0.7374 |
| YRI | BOLA2B | 30657932 | 3.0119 | 6.0502  | -1.4396 |
| YRI | BOLA2B | 30662932 | 3.3568 | 6.7225  | -1.4503 |
| YRI | BOLA2B | 30667932 | 4.9513 | 6.8906  | -0.8172 |
| YRI | BOLA2B | 30672932 | 3.9805 | 7.0586  | -1.2689 |
| YRI | BOLA2B | 30677932 | 2.6348 | 9.2434  | -2.1268 |
| YRI | BOLA2B | 30682932 | 3.6773 | 9.5795  | -1.8375 |
| YRI | BOLA2B | 30687932 | 4.9929 | 10.0837 | -1.511  |
| CEU | CBWD3  | 65171374 | 0      | 0       | 0       |
| CEU | CBWD3  | 65176374 | 0      | 0       | 0       |
| CEU | CBWD3  | 65181374 | 0      | 0       | 0       |
| CEU | CBWD3  | 65186374 | 0      | 0       | 0       |
| CEU | CBWD3  | 65191374 | 0      | 0       | 0       |
| CEU | CBWD3  | 65196374 | 0      | 0       | 0       |
| CEU | CBWD3  | 65201374 | 0      | 0       | 0       |
| CEU | CBWD3  | 65206374 | 0      | 0       | 0       |
| CEU | CBWD3  | 65211374 | 0      | 0       | 0       |
| CEU | CBWD3  | 65216374 | 0      | 0       | 0       |
| CEU | CBWD3  | 65221374 | 0      | 0       | 0       |
| CEU | CBWD3  | 65226374 | 0      | 0       | 0       |
| CEU | CBWD3  | 65231374 | 0      | 0       | 0       |
| CEU | CBWD3  | 65236374 | 0      | 0       | 0       |
| CEU | CBWD3  | 65241374 | 0      | 0       | 0       |
| CEU | CBWD3  | 65246374 | 0      | 0       | 0       |
| CEU | CBWD3  | 65251374 | 0      | 0       | 0       |
| CEU | CBWD3  | 65256374 | 0      | 0       | 0       |

## 2\_TajimasD\_data

|     |       |          |        |        |         |
|-----|-------|----------|--------|--------|---------|
| CEU | CBWD3 | 65261374 | 0      | 0      | 0       |
| CEU | CBWD3 | 65266374 | 0      | 0      | 0       |
| CEU | CBWD3 | 65271374 | 0      | 0      | 0       |
| CEU | CBWD3 | 65276374 | 0      | 0      | 0       |
| CEU | CBWD3 | 65281374 | 0      | 0      | 0       |
| CEU | CBWD3 | 65286374 | 0      | 0      | 0       |
| CEU | CBWD3 | 65291374 | 0      | 0      | 0       |
| CEU | CBWD3 | 65296374 | 0      | 0      | 0       |
| CEU | CBWD3 | 65301374 | 0      | 0      | 0       |
| CEU | CBWD3 | 65306374 | 0      | 0      | 0       |
| CEU | CBWD3 | 65311374 | 0      | 0      | 0       |
| CEU | CBWD3 | 65316374 | 0      | 0      | 0       |
| CEU | CBWD3 | 65321374 | 0      | 0      | 0       |
| CEU | CBWD3 | 65326374 | 0      | 0      | 0       |
| CEU | CBWD3 | 65331374 | 0      | 0      | 0       |
| CEU | CBWD3 | 65336374 | 0      | 0      | 0       |
| CEU | CBWD3 | 65341374 | 0      | 0      | 0       |
| CEU | CBWD3 | 65346374 | 0      | 0      | 0       |
| CEU | CBWD3 | 65351374 | 0      | 0      | 0       |
| CEU | CBWD3 | 65356374 | 0      | 0      | 0       |
| CEU | CBWD3 | 65361374 | 0      | 0      | 0       |
| CEU | CBWD3 | 65366374 | 0      | 0      | 0       |
| CEU | CBWD3 | 65371374 | 0      | 0      | 0       |
| CEU | CBWD3 | 65376374 | 0      | 0      | 0       |
| CEU | CBWD3 | 65381374 | 0      | 0      | 0       |
| CEU | CBWD3 | 65386374 | 0      | 0      | 0       |
| CEU | CBWD3 | 65391374 | 0      | 0      | 0       |
| CEU | CBWD3 | 65396374 | 0      | 0      | 0       |
| CEU | CBWD3 | 65401374 | 0      | 0      | 0       |
| CEU | CBWD3 | 65406374 | 0      | 0      | 0       |
| CEU | CBWD3 | 65411374 | 0      | 0      | 0       |
| CEU | CBWD3 | 65416374 | 0      | 0      | 0       |
| CEU | CBWD3 | 65421374 | 0      | 0      | 0       |
| CEU | CBWD3 | 65426374 | 0      | 0      | 0       |
| CEU | CBWD3 | 65431374 | 0      | 0      | 0       |
| CEU | CBWD3 | 65436374 | 0      | 0      | 0       |
| CEU | CBWD3 | 65441374 | 0      | 0      | 0       |
| CEU | CBWD3 | 65446374 | 0      | 0      | 0       |
| CEU | CBWD3 | 65451374 | 0      | 0      | 0       |
| CEU | CBWD3 | 65456374 | 0      | 0      | 0       |
| CEU | CBWD3 | 65461374 | 0      | 0      | 0       |
| CEU | CBWD3 | 65466374 | 0      | 0      | 0       |
| CEU | CBWD3 | 65471374 | 0.6937 | 0.6822 | 0.03    |
| CEU | CBWD3 | 65476374 | 0.8955 | 1.3645 | -0.7587 |
| CEU | CBWD3 | 65481374 | 1.3539 | 1.5351 | -0.2687 |
| CEU | CBWD3 | 65486374 | 1.1521 | 0.8528 | 0.674   |
| CEU | CBWD3 | 65491374 | 0      | 0      | 0       |
| CEU | CBWD3 | 65496374 | 0      | 0      | 0       |
| CEU | CBWD3 | 65501374 | 0      | 0      | 0       |

## 2\_TajimasD\_data

|     |       |          |        |         |         |
|-----|-------|----------|--------|---------|---------|
| CEU | CBWD3 | 65506374 | 0.0404 | 0.6822  | -1.6759 |
| CEU | CBWD3 | 65511374 | 0.0404 | 0.6822  | -1.6759 |
| CEU | CBWD3 | 65516374 | 0      | 0       | 0       |
| CEU | CBWD3 | 65521374 | 0      | 0       | 0       |
| CEU | CBWD3 | 65526374 | 0      | 0       | 0       |
| CEU | CBWD3 | 65531374 | 0      | 0       | 0       |
| CEU | CBWD3 | 65536374 | 0.0101 | 0.1706  | -0.9534 |
| CEU | CBWD3 | 65541374 | 0.0101 | 0.1706  | -0.9534 |
| CEU | CBWD3 | 65546374 | 0.873  | 0.5117  | 1.1331  |
| CEU | CBWD3 | 65551374 | 1.248  | 0.8528  | 0.89    |
| CEU | CBWD3 | 65556374 | 0.9382 | 1.3645  | -0.6897 |
| CEU | CBWD3 | 65561374 | 0.5834 | 1.3645  | -1.2637 |
| CEU | CBWD3 | 65566374 | 0.0202 | 0.3411  | -1.2864 |
| CEU | CBWD3 | 65571374 | 0.0101 | 0.1706  | -0.9534 |
| CEU | CBWD3 | 65576374 | 1.3063 | 1.0234  | 0.5621  |
| CEU | CBWD3 | 65581374 | 1.2962 | 0.8528  | 0.9985  |
| CEU | CBWD3 | 65586374 | 0      | 0       | 0       |
| CEU | CBWD3 | 65591374 | 1.5028 | 1.8762  | -0.4754 |
| CEU | CBWD3 | 65596374 | 3.8621 | 5.458   | -0.8343 |
| CEU | CBWD3 | 65601374 | 4.3185 | 9.3809  | -1.6172 |
| CEU | CBWD3 | 65606374 | 3.7846 | 8.3576  | -1.6256 |
| CEU | CBWD3 | 65611374 | 6.7862 | 8.6987  | -0.6552 |
| CEU | CBWD3 | 65616374 | 8.4875 | 11.2571 | -0.7463 |
| CEU | CBWD3 | 65621374 | 6.1843 | 8.8692  | -0.9035 |
| CEU | CBWD3 | 65626374 | 4.6458 | 8.187   | -1.2829 |
| CEU | CBWD3 | 65631374 | 6.1309 | 9.8926  | -1.1438 |
| CEU | CBWD3 | 65636374 | 4.8753 | 7.1636  | -0.9367 |
| CEU | CBWD3 | 65641374 | 0.8503 | 2.2173  | -1.5272 |
| CEU | CBWD3 | 65646374 | 0.1177 | 0.5117  | -1.2357 |
| CEU | CBWD3 | 65651374 | 0.0101 | 0.1706  | -0.9534 |
| CEU | CBWD3 | 65656374 | 0.0101 | 0.1706  | -0.9534 |
| CEU | CBWD3 | 65661374 | 0      | 0       | 0       |
| CEU | CBWD3 | 65666374 | 0      | 0       | 0       |
| CEU | CBWD3 | 65671374 | 0.04   | 0.1706  | -0.7758 |
| CEU | CBWD3 | 65676374 | 0.04   | 0.1706  | -0.7758 |
| CEU | CBWD3 | 65681374 | 0      | 0       | 0       |
| CEU | CBWD3 | 65686374 | 0.1328 | 0.3411  | -0.835  |
| CEU | CBWD3 | 65691374 | 0.1328 | 0.3411  | -0.835  |
| CEU | CBWD3 | 65696374 | 0      | 0       | 0       |
| CEU | CBWD3 | 65701374 | 0      | 0       | 0       |
| CEU | CBWD3 | 65706374 | 0.02   | 0.1706  | -0.8946 |
| CEU | CBWD3 | 65711374 | 0.2216 | 0.5117  | -0.9098 |
| CEU | CBWD3 | 65716374 | 0.2016 | 0.3411  | -0.5592 |
| CEU | CBWD3 | 65721374 | 0      | 0       | 0       |
| CEU | CBWD3 | 65726374 | 0      | 0       | 0       |
| CEU | CBWD3 | 65731374 | 0.0202 | 0.1706  | -0.8934 |
| CEU | CBWD3 | 65736374 | 0.3871 | 0.5117  | -0.3908 |
| CEU | CBWD3 | 65741374 | 0.5852 | 0.8528  | -0.6026 |
| CEU | CBWD3 | 65746374 | 0.4098 | 0.6822  | -0.7113 |

## 2\_TajimasD\_data

|     |       |          |        |        |         |
|-----|-------|----------|--------|--------|---------|
| CEU | CBWD3 | 65751374 | 0.3445 | 0.5117 | -0.5244 |
| CEU | CBWD3 | 65756374 | 0.2228 | 0.8528 | -1.4187 |
| CEU | CBWD3 | 65761374 | 0.1    | 0.6822 | -1.5203 |
| CEU | CBWD3 | 65766374 | 0.7547 | 1.8762 | -1.4279 |
| CEU | CBWD3 | 65771374 | 1.1459 | 2.2173 | -1.197  |
| CEU | CBWD3 | 65776374 | 0.4995 | 0.6822 | -0.4771 |
| CEU | CBWD3 | 65781374 | 0.1078 | 0.3411 | -0.9352 |
| CEU | CBWD3 | 65786374 | 0.0398 | 0.3411 | -1.2078 |
| CEU | CBWD3 | 65791374 | 0.0303 | 0.3411 | -1.2459 |
| CEU | CBWD3 | 65796374 | 0.1651 | 0.5117 | -1.087  |
| CEU | CBWD3 | 65801374 | 0.1449 | 0.3411 | -0.7865 |
| CEU | CBWD3 | 65806374 | 0.0101 | 0.1706 | -0.9534 |
| CEU | CBWD3 | 65811374 | 0.0101 | 0.1706 | -0.9534 |
| CEU | CBWD3 | 65816374 | 0      | 0      | 0       |
| CEU | CBWD3 | 65821374 | 0.4455 | 0.5117 | -0.2076 |
| CEU | CBWD3 | 65826374 | 0.4455 | 0.5117 | -0.2076 |
| CEU | CBWD3 | 65831374 | 0      | 0      | 0       |
| CEU | CBWD3 | 65836374 | 0.0676 | 0.1706 | -0.6118 |
| CEU | CBWD3 | 65841374 | 0.0676 | 0.1706 | -0.6118 |
| CEU | CBWD3 | 65846374 | 0      | 0      | 0       |
| CEU | CBWD3 | 65851374 | 0      | 0      | 0       |
| CEU | CBWD3 | 65856374 | 0.4185 | 0.3411 | 0.3103  |
| CEU | CBWD3 | 65861374 | 0.4185 | 0.5117 | -0.2923 |
| CEU | CBWD3 | 65866374 | 0.1348 | 0.5117 | -1.1821 |
| CEU | CBWD3 | 65871374 | 0.564  | 0.6822 | -0.3087 |
| CEU | CBWD3 | 65876374 | 1.5053 | 1.3645 | 0.2278  |
| CEU | CBWD3 | 65881374 | 1.0761 | 1.0234 | 0.1047  |
| CEU | CBWD3 | 65886374 | 0.4673 | 0.1706 | 1.7625  |
| CEU | CBWD3 | 65891374 | 1.4797 | 0.8528 | 1.4118  |
| CEU | CBWD3 | 65896374 | 1.6448 | 1.7056 | -0.0833 |
| CEU | CBWD3 | 65901374 | 0.6324 | 1.0234 | -0.7769 |
| CEU | CBWD3 | 65906374 | 0      | 0      | 0       |
| CEU | CBWD3 | 65911374 | 0      | 0      | 0       |
| CEU | CBWD3 | 65916374 | 1.8213 | 1.5351 | 0.4244  |
| CEU | CBWD3 | 65921374 | 1.8213 | 1.5351 | 0.4244  |
| CEU | CBWD3 | 65926374 | 0      | 0      | 0       |
| CEU | CBWD3 | 65931374 | 0      | 0      | 0       |
| CEU | CBWD3 | 65936374 | 0      | 0      | 0       |
| CEU | CBWD3 | 65941374 | 0      | 0      | 0       |
| CEU | CBWD3 | 65946374 | 0      | 0      | 0       |
| CEU | CBWD3 | 65951374 | 0      | 0      | 0       |
| CEU | CBWD3 | 65956374 | 0      | 0      | 0       |
| CEU | CBWD3 | 65961374 | 0      | 0      | 0       |
| CEU | CBWD3 | 65966374 | 0.0404 | 0.5117 | -1.4781 |
| CEU | CBWD3 | 65971374 | 2.0656 | 1.7056 | 0.4931  |
| CEU | CBWD3 | 65976374 | 2.2773 | 1.7056 | 0.783   |
| CEU | CBWD3 | 65981374 | 0.302  | 0.8528 | -1.2404 |
| CEU | CBWD3 | 65986374 | 0.1765 | 0.8528 | -1.523  |
| CEU | CBWD3 | 65991374 | 0.3434 | 1.7056 | -1.8657 |



## 2\_TajimasD\_data

|     |       |          |        |        |         |
|-----|-------|----------|--------|--------|---------|
| CEU | CBWD3 | 65996374 | 0.227  | 1.3645 | -1.8402 |
| CEU | CBWD3 | 66001374 | 0.2579 | 0.5117 | -0.796  |
| CEU | CBWD3 | 66006374 | 0.8932 | 1.5351 | -0.9518 |
| CEU | CBWD3 | 66011374 | 1.1857 | 1.8762 | -0.8791 |
| CEU | CBWD3 | 66016374 | 0.8108 | 1.7056 | -1.2255 |
| CEU | CBWD3 | 66021374 | 0.2705 | 1.0234 | -1.496  |
| CEU | CBWD3 | 66026374 | 0.0303 | 0.5117 | -1.5098 |
| CEU | CBWD3 | 66031374 | 0.1004 | 1.0234 | -1.834  |
| CEU | CBWD3 | 66036374 | 0.1771 | 0.8528 | -1.5217 |
| CEU | CBWD3 | 66041374 | 0.1171 | 0.5117 | -1.2376 |
| CEU | CBWD3 | 66046374 | 0.3317 | 1.0234 | -1.3744 |
| CEU | CBWD3 | 66051374 | 0.3418 | 1.1939 | -1.5185 |
| CEU | CBWD3 | 66056374 | 0.0202 | 0.3411 | -1.2864 |
| CEU | CBWD3 | 66061374 | 0      | 0      | 0       |
| CEU | CBWD3 | 66066374 | 0      | 0      | 0       |
| CEU | CBWD3 | 66071374 | 0.0101 | 0.1706 | -0.9534 |
| CEU | CBWD3 | 66076374 | 0.0101 | 0.1706 | -0.9534 |
| CEU | CBWD3 | 66081374 | 0.04   | 0.3411 | -1.207  |
| CEU | CBWD3 | 66086374 | 0.7912 | 0.8528 | -0.1387 |
| CEU | CBWD3 | 66091374 | 0.7512 | 0.5117 | 0.7511  |
| CEU | CBWD3 | 66096374 | 0.1183 | 0.5117 | -1.2338 |
| CEU | CBWD3 | 66101374 | 0.6184 | 0.6822 | -0.1666 |
| CEU | CBWD3 | 66106374 | 0.5399 | 0.3411 | 0.7969  |
| CEU | CBWD3 | 66111374 | 0.6613 | 1.3645 | -1.1376 |
| CEU | CBWD3 | 66116374 | 0.9928 | 2.3879 | -1.4692 |
| CEU | CBWD3 | 66121374 | 0.3713 | 1.1939 | -1.4659 |
| CEU | CBWD3 | 66126374 | 0.1002 | 0.6822 | -1.5198 |
| CEU | CBWD3 | 66131374 | 0.1002 | 0.6822 | -1.5198 |
| CEU | CBWD3 | 66136374 | 0.0992 | 0.6822 | -1.5224 |
| CEU | CBWD3 | 66141374 | 0.0992 | 0.6822 | -1.5224 |
| CEU | CBWD3 | 66146374 | 0      | 0      | 0       |
| CEU | CBWD3 | 66151374 | 0.0101 | 0.1706 | -0.9534 |
| CEU | CBWD3 | 66156374 | 0.0101 | 0.1706 | -0.9534 |
| CEU | CBWD3 | 66161374 | 0.4745 | 0.1706 | 1.8052  |
| CEU | CBWD3 | 66166374 | 0.4745 | 0.1706 | 1.8052  |
| CEU | CBWD3 | 66171374 | 0      | 0      | 0       |
| CEU | CBWD3 | 66176374 | 0      | 0      | 0       |
| CEU | CBWD3 | 66181374 | 0      | 0      | 0       |
| CEU | CBWD3 | 66186374 | 0      | 0      | 0       |
| CEU | CBWD3 | 66191374 | 0      | 0      | 0       |
| CEU | CBWD3 | 66196374 | 0      | 0      | 0       |
| CEU | CBWD3 | 66201374 | 0      | 0      | 0       |
| CEU | CBWD3 | 66206374 | 0      | 0      | 0       |
| CEU | CBWD3 | 66211374 | 0      | 0      | 0       |
| CEU | CBWD3 | 66216374 | 0      | 0      | 0       |
| CEU | CBWD3 | 66221374 | 0      | 0      | 0       |
| CEU | CBWD3 | 66226374 | 0      | 0      | 0       |
| CHB | CBWD3 | 65171374 | 0      | 0      | 0       |
| CHB | CBWD3 | 65176374 | 0      | 0      | 0       |

## 2\_TajimasD\_data

|     |       |          |   |   |   |
|-----|-------|----------|---|---|---|
| CHB | CBWD3 | 65181374 | 0 | 0 | 0 |
| CHB | CBWD3 | 65186374 | 0 | 0 | 0 |
| CHB | CBWD3 | 65191374 | 0 | 0 | 0 |
| CHB | CBWD3 | 65196374 | 0 | 0 | 0 |
| CHB | CBWD3 | 65201374 | 0 | 0 | 0 |
| CHB | CBWD3 | 65206374 | 0 | 0 | 0 |
| CHB | CBWD3 | 65211374 | 0 | 0 | 0 |
| CHB | CBWD3 | 65216374 | 0 | 0 | 0 |
| CHB | CBWD3 | 65221374 | 0 | 0 | 0 |
| CHB | CBWD3 | 65226374 | 0 | 0 | 0 |
| CHB | CBWD3 | 65231374 | 0 | 0 | 0 |
| CHB | CBWD3 | 65236374 | 0 | 0 | 0 |
| CHB | CBWD3 | 65241374 | 0 | 0 | 0 |
| CHB | CBWD3 | 65246374 | 0 | 0 | 0 |
| CHB | CBWD3 | 65251374 | 0 | 0 | 0 |
| CHB | CBWD3 | 65256374 | 0 | 0 | 0 |
| CHB | CBWD3 | 65261374 | 0 | 0 | 0 |
| CHB | CBWD3 | 65266374 | 0 | 0 | 0 |
| CHB | CBWD3 | 65271374 | 0 | 0 | 0 |
| CHB | CBWD3 | 65276374 | 0 | 0 | 0 |
| CHB | CBWD3 | 65281374 | 0 | 0 | 0 |
| CHB | CBWD3 | 65286374 | 0 | 0 | 0 |
| CHB | CBWD3 | 65291374 | 0 | 0 | 0 |
| CHB | CBWD3 | 65296374 | 0 | 0 | 0 |
| CHB | CBWD3 | 65301374 | 0 | 0 | 0 |
| CHB | CBWD3 | 65306374 | 0 | 0 | 0 |
| CHB | CBWD3 | 65311374 | 0 | 0 | 0 |
| CHB | CBWD3 | 65316374 | 0 | 0 | 0 |
| CHB | CBWD3 | 65321374 | 0 | 0 | 0 |
| CHB | CBWD3 | 65326374 | 0 | 0 | 0 |
| CHB | CBWD3 | 65331374 | 0 | 0 | 0 |
| CHB | CBWD3 | 65336374 | 0 | 0 | 0 |
| CHB | CBWD3 | 65341374 | 0 | 0 | 0 |
| CHB | CBWD3 | 65346374 | 0 | 0 | 0 |
| CHB | CBWD3 | 65351374 | 0 | 0 | 0 |
| CHB | CBWD3 | 65356374 | 0 | 0 | 0 |
| CHB | CBWD3 | 65361374 | 0 | 0 | 0 |
| CHB | CBWD3 | 65366374 | 0 | 0 | 0 |
| CHB | CBWD3 | 65371374 | 0 | 0 | 0 |
| CHB | CBWD3 | 65376374 | 0 | 0 | 0 |
| CHB | CBWD3 | 65381374 | 0 | 0 | 0 |
| CHB | CBWD3 | 65386374 | 0 | 0 | 0 |
| CHB | CBWD3 | 65391374 | 0 | 0 | 0 |
| CHB | CBWD3 | 65396374 | 0 | 0 | 0 |
| CHB | CBWD3 | 65401374 | 0 | 0 | 0 |
| CHB | CBWD3 | 65406374 | 0 | 0 | 0 |
| CHB | CBWD3 | 65411374 | 0 | 0 | 0 |
| CHB | CBWD3 | 65416374 | 0 | 0 | 0 |
| CHB | CBWD3 | 65421374 | 0 | 0 | 0 |

## 2\_TajimasD\_data

|     |       |          |        |         |         |
|-----|-------|----------|--------|---------|---------|
| CHB | CBWD3 | 65426374 | 0      | 0       | 0       |
| CHB | CBWD3 | 65431374 | 0      | 0       | 0       |
| CHB | CBWD3 | 65436374 | 0      | 0       | 0       |
| CHB | CBWD3 | 65441374 | 0      | 0       | 0       |
| CHB | CBWD3 | 65446374 | 0      | 0       | 0       |
| CHB | CBWD3 | 65451374 | 0      | 0       | 0       |
| CHB | CBWD3 | 65456374 | 0      | 0       | 0       |
| CHB | CBWD3 | 65461374 | 0      | 0       | 0       |
| CHB | CBWD3 | 65466374 | 0      | 0       | 0       |
| CHB | CBWD3 | 65471374 | 0.5772 | 0.8471  | -0.6086 |
| CHB | CBWD3 | 65476374 | 1.0893 | 1.1859  | -0.1724 |
| CHB | CBWD3 | 65481374 | 0.9219 | 0.8471  | 0.1687  |
| CHB | CBWD3 | 65486374 | 0.4099 | 0.5082  | -0.3086 |
| CHB | CBWD3 | 65491374 | 0      | 0       | 0       |
| CHB | CBWD3 | 65496374 | 0      | 0       | 0       |
| CHB | CBWD3 | 65501374 | 0      | 0       | 0       |
| CHB | CBWD3 | 65506374 | 0      | 0       | 0       |
| CHB | CBWD3 | 65511374 | 0      | 0       | 0       |
| CHB | CBWD3 | 65516374 | 0.0097 | 0.1694  | -0.949  |
| CHB | CBWD3 | 65521374 | 0.0097 | 0.1694  | -0.949  |
| CHB | CBWD3 | 65526374 | 0.0388 | 0.6777  | -1.6703 |
| CHB | CBWD3 | 65531374 | 0.0388 | 0.6777  | -1.6703 |
| CHB | CBWD3 | 65536374 | 0      | 0       | 0       |
| CHB | CBWD3 | 65541374 | 0      | 0       | 0       |
| CHB | CBWD3 | 65546374 | 0.5561 | 0.8471  | -0.6562 |
| CHB | CBWD3 | 65551374 | 0.8414 | 1.3553  | -0.8329 |
| CHB | CBWD3 | 65556374 | 0.4483 | 1.8636  | -1.8057 |
| CHB | CBWD3 | 65561374 | 0.163  | 1.3553  | -1.9324 |
| CHB | CBWD3 | 65566374 | 0      | 0       | 0       |
| CHB | CBWD3 | 65571374 | 0      | 0       | 0       |
| CHB | CBWD3 | 65576374 | 1.3939 | 0.8471  | 1.233   |
| CHB | CBWD3 | 65581374 | 1.3939 | 0.8471  | 1.233   |
| CHB | CBWD3 | 65586374 | 0      | 0       | 0       |
| CHB | CBWD3 | 65591374 | 1.8165 | 2.3718  | -0.5862 |
| CHB | CBWD3 | 65596374 | 3.9001 | 5.7601  | -0.9241 |
| CHB | CBWD3 | 65601374 | 3.6292 | 6.4378  | -1.2628 |
| CHB | CBWD3 | 65606374 | 3.3722 | 5.0825  | -0.9495 |
| CHB | CBWD3 | 65611374 | 5.1135 | 7.7931  | -1.0127 |
| CHB | CBWD3 | 65616374 | 5.1424 | 10.6731 | -1.5621 |
| CHB | CBWD3 | 65621374 | 4.5142 | 7.2848  | -1.1137 |
| CHB | CBWD3 | 65626374 | 4.7291 | 6.946   | -0.9306 |
| CHB | CBWD3 | 65631374 | 6.1519 | 9.1484  | -0.977  |
| CHB | CBWD3 | 65636374 | 4.1668 | 5.0825  | -0.5084 |
| CHB | CBWD3 | 65641374 | 0.1047 | 0.6777  | -1.498  |
| CHB | CBWD3 | 65646374 | 0.0194 | 0.1694  | -0.8913 |
| CHB | CBWD3 | 65651374 | 0.0194 | 0.1694  | -0.8913 |
| CHB | CBWD3 | 65656374 | 0.0194 | 0.1694  | -0.8913 |
| CHB | CBWD3 | 65661374 | 0      | 0       | 0       |
| CHB | CBWD3 | 65666374 | 0      | 0       | 0       |

## 2\_TajimasD\_data

|     |       |          |        |        |         |
|-----|-------|----------|--------|--------|---------|
| CHB | CBWD3 | 65671374 | 0.0097 | 0.1694 | -0.949  |
| CHB | CBWD3 | 65676374 | 0.0097 | 0.1694 | -0.949  |
| CHB | CBWD3 | 65681374 | 0      | 0      | 0       |
| CHB | CBWD3 | 65686374 | 0.1881 | 0.3388 | -0.6045 |
| CHB | CBWD3 | 65691374 | 0.2075 | 0.5082 | -0.9439 |
| CHB | CBWD3 | 65696374 | 0.0194 | 0.1694 | -0.8913 |
| CHB | CBWD3 | 65701374 | 0      | 0      | 0       |
| CHB | CBWD3 | 65706374 | 0      | 0      | 0       |
| CHB | CBWD3 | 65711374 | 0.3859 | 0.1694 | 1.2865  |
| CHB | CBWD3 | 65716374 | 0.3859 | 0.1694 | 1.2865  |
| CHB | CBWD3 | 65721374 | 0      | 0      | 0       |
| CHB | CBWD3 | 65726374 | 0      | 0      | 0       |
| CHB | CBWD3 | 65731374 | 0      | 0      | 0       |
| CHB | CBWD3 | 65736374 | 0.7717 | 0.3388 | 1.7365  |
| CHB | CBWD3 | 65741374 | 1.1342 | 0.6777 | 1.1934  |
| CHB | CBWD3 | 65746374 | 0.6901 | 0.5082 | 0.571   |
| CHB | CBWD3 | 65751374 | 0.6551 | 0.5082 | 0.4611  |
| CHB | CBWD3 | 65756374 | 0.3468 | 0.5082 | -0.5067 |
| CHB | CBWD3 | 65761374 | 0.0194 | 0.1694 | -0.8913 |
| CHB | CBWD3 | 65766374 | 0.6141 | 1.0165 | -0.8008 |
| CHB | CBWD3 | 65771374 | 1.1371 | 1.5247 | -0.5758 |
| CHB | CBWD3 | 65776374 | 0.5422 | 0.6777 | -0.3542 |
| CHB | CBWD3 | 65781374 | 0.0482 | 0.5082 | -1.444  |
| CHB | CBWD3 | 65786374 | 0.0289 | 0.3388 | -1.2431 |
| CHB | CBWD3 | 65791374 | 0      | 0.1694 | -1.0066 |
| CHB | CBWD3 | 65796374 | 0.1498 | 0.6777 | -1.3801 |
| CHB | CBWD3 | 65801374 | 0.1498 | 0.5082 | -1.1251 |
| CHB | CBWD3 | 65806374 | 0      | 0      | 0       |
| CHB | CBWD3 | 65811374 | 0.0579 | 0.5082 | -1.4136 |
| CHB | CBWD3 | 65816374 | 0.0579 | 0.5082 | -1.4136 |
| CHB | CBWD3 | 65821374 | 0.4139 | 0.5082 | -0.296  |
| CHB | CBWD3 | 65826374 | 0.4139 | 0.5082 | -0.296  |
| CHB | CBWD3 | 65831374 | 0      | 0      | 0       |
| CHB | CBWD3 | 65836374 | 0.1272 | 0.1694 | -0.2508 |
| CHB | CBWD3 | 65841374 | 0.2031 | 0.5082 | -0.9578 |
| CHB | CBWD3 | 65846374 | 0.076  | 0.3388 | -1.0542 |
| CHB | CBWD3 | 65851374 | 0      | 0      | 0       |
| CHB | CBWD3 | 65856374 | 0.1763 | 0.1694 | 0.041   |
| CHB | CBWD3 | 65861374 | 0.1763 | 0.3388 | -0.6518 |
| CHB | CBWD3 | 65866374 | 0.0097 | 0.3388 | -1.3201 |
| CHB | CBWD3 | 65871374 | 0.4064 | 0.5082 | -0.3196 |
| CHB | CBWD3 | 65876374 | 1.2606 | 0.8471 | 0.9324  |
| CHB | CBWD3 | 65881374 | 0.8639 | 0.5082 | 1.1166  |
| CHB | CBWD3 | 65886374 | 0.3758 | 0.1694 | 1.2265  |
| CHB | CBWD3 | 65891374 | 1.0484 | 0.8471 | 0.4539  |
| CHB | CBWD3 | 65896374 | 1.0739 | 1.1859 | -0.1999 |
| CHB | CBWD3 | 65901374 | 0.4207 | 0.6777 | -0.6719 |
| CHB | CBWD3 | 65906374 | 0.0194 | 0.1694 | -0.8913 |
| CHB | CBWD3 | 65911374 | 0      | 0      | 0       |

## 2\_TajimasD\_data

|     |       |          |        |        |         |
|-----|-------|----------|--------|--------|---------|
| CHB | CBWD3 | 65916374 | 1.1277 | 1.3553 | -0.3689 |
| CHB | CBWD3 | 65921374 | 1.1277 | 1.3553 | -0.3689 |
| CHB | CBWD3 | 65926374 | 0      | 0      | 0       |
| CHB | CBWD3 | 65931374 | 0      | 0      | 0       |
| CHB | CBWD3 | 65936374 | 0      | 0      | 0       |
| CHB | CBWD3 | 65941374 | 0      | 0      | 0       |
| CHB | CBWD3 | 65946374 | 0      | 0      | 0       |
| CHB | CBWD3 | 65951374 | 0      | 0      | 0       |
| CHB | CBWD3 | 65956374 | 0      | 0      | 0       |
| CHB | CBWD3 | 65961374 | 0      | 0      | 0       |
| CHB | CBWD3 | 65966374 | 0.1506 | 0.8471 | -1.5706 |
| CHB | CBWD3 | 65971374 | 2.1294 | 1.8636 | 0.3391  |
| CHB | CBWD3 | 65976374 | 1.9983 | 1.3553 | 1.0421  |
| CHB | CBWD3 | 65981374 | 0.0291 | 0.5082 | -1.504  |
| CHB | CBWD3 | 65986374 | 0.3128 | 0.3388 | -0.1043 |
| CHB | CBWD3 | 65991374 | 0.5285 | 0.6777 | -0.3901 |
| CHB | CBWD3 | 65996374 | 0.2825 | 0.6777 | -1.0332 |
| CHB | CBWD3 | 66001374 | 1.0436 | 0.5082 | 1.6807  |
| CHB | CBWD3 | 66006374 | 1.7295 | 0.8471 | 1.9898  |
| CHB | CBWD3 | 66011374 | 1.2046 | 1.8636 | -0.8408 |
| CHB | CBWD3 | 66016374 | 1.4097 | 2.5412 | -1.1299 |
| CHB | CBWD3 | 66021374 | 0.948  | 1.1859 | -0.4246 |
| CHB | CBWD3 | 66026374 | 0.0474 | 0.1694 | -0.7249 |
| CHB | CBWD3 | 66031374 | 0.4761 | 0.6777 | -0.527  |
| CHB | CBWD3 | 66036374 | 0.5351 | 1.3553 | -1.3293 |
| CHB | CBWD3 | 66041374 | 0.1161 | 1.0165 | -1.7918 |
| CHB | CBWD3 | 66046374 | 0.4959 | 0.6777 | -0.4753 |
| CHB | CBWD3 | 66051374 | 0.4862 | 0.5082 | -0.0691 |
| CHB | CBWD3 | 66056374 | 0      | 0      | 0       |
| CHB | CBWD3 | 66061374 | 0      | 0      | 0       |
| CHB | CBWD3 | 66066374 | 0.0388 | 0.3388 | -1.2034 |
| CHB | CBWD3 | 66071374 | 0.0388 | 0.3388 | -1.2034 |
| CHB | CBWD3 | 66076374 | 0      | 0      | 0       |
| CHB | CBWD3 | 66081374 | 0      | 0      | 0       |
| CHB | CBWD3 | 66086374 | 0.4323 | 0.1694 | 1.5622  |
| CHB | CBWD3 | 66091374 | 0.4323 | 0.1694 | 1.5622  |
| CHB | CBWD3 | 66096374 | 0.0485 | 0.5082 | -1.4431 |
| CHB | CBWD3 | 66101374 | 0.534  | 0.6777 | -0.3757 |
| CHB | CBWD3 | 66106374 | 0.4951 | 0.3388 | 0.627   |
| CHB | CBWD3 | 66111374 | 0.9564 | 1.3553 | -0.6465 |
| CHB | CBWD3 | 66116374 | 1.8431 | 2.3718 | -0.5581 |
| CHB | CBWD3 | 66121374 | 0.9061 | 1.3553 | -0.728  |
| CHB | CBWD3 | 66126374 | 0.0485 | 0.6777 | -1.6449 |
| CHB | CBWD3 | 66131374 | 0.0388 | 0.5082 | -1.4735 |
| CHB | CBWD3 | 66136374 | 0.0554 | 0.1694 | -0.6774 |
| CHB | CBWD3 | 66141374 | 0.0554 | 0.1694 | -0.6774 |
| CHB | CBWD3 | 66146374 | 0      | 0      | 0       |
| CHB | CBWD3 | 66151374 | 0      | 0      | 0       |
| CHB | CBWD3 | 66156374 | 0      | 0      | 0       |

## 2\_TajimasD\_data

|     |       |          |        |        |        |
|-----|-------|----------|--------|--------|--------|
| CHB | CBWD3 | 66161374 | 0.1769 | 0.1694 | 0.0446 |
| CHB | CBWD3 | 66166374 | 0.1769 | 0.1694 | 0.0446 |
| CHB | CBWD3 | 66171374 | 0      | 0      | 0      |
| CHB | CBWD3 | 66176374 | 0      | 0      | 0      |
| CHB | CBWD3 | 66181374 | 0.0097 | 0.1694 | -0.949 |
| CHB | CBWD3 | 66186374 | 0.0097 | 0.1694 | -0.949 |
| CHB | CBWD3 | 66191374 | 0      | 0      | 0      |
| CHB | CBWD3 | 66196374 | 0      | 0      | 0      |
| CHB | CBWD3 | 66201374 | 0      | 0      | 0      |
| CHB | CBWD3 | 66206374 | 0      | 0      | 0      |
| CHB | CBWD3 | 66211374 | 0      | 0      | 0      |
| CHB | CBWD3 | 66216374 | 0      | 0      | 0      |
| CHB | CBWD3 | 66221374 | 0      | 0      | 0      |
| CHB | CBWD3 | 66226374 | 0      | 0      | 0      |
| YRI | CBWD3 | 65171374 | 0      | 0      | 0      |
| YRI | CBWD3 | 65176374 | 0      | 0      | 0      |
| YRI | CBWD3 | 65181374 | 0      | 0      | 0      |
| YRI | CBWD3 | 65186374 | 0      | 0      | 0      |
| YRI | CBWD3 | 65191374 | 0      | 0      | 0      |
| YRI | CBWD3 | 65196374 | 0      | 0      | 0      |
| YRI | CBWD3 | 65201374 | 0      | 0      | 0      |
| YRI | CBWD3 | 65206374 | 0      | 0      | 0      |
| YRI | CBWD3 | 65211374 | 0      | 0      | 0      |
| YRI | CBWD3 | 65216374 | 0      | 0      | 0      |
| YRI | CBWD3 | 65221374 | 0      | 0      | 0      |
| YRI | CBWD3 | 65226374 | 0      | 0      | 0      |
| YRI | CBWD3 | 65231374 | 0      | 0      | 0      |
| YRI | CBWD3 | 65236374 | 0      | 0      | 0      |
| YRI | CBWD3 | 65241374 | 0      | 0      | 0      |
| YRI | CBWD3 | 65246374 | 0      | 0      | 0      |
| YRI | CBWD3 | 65251374 | 0      | 0      | 0      |
| YRI | CBWD3 | 65256374 | 0      | 0      | 0      |
| YRI | CBWD3 | 65261374 | 0      | 0      | 0      |
| YRI | CBWD3 | 65266374 | 0      | 0      | 0      |
| YRI | CBWD3 | 65271374 | 0      | 0      | 0      |
| YRI | CBWD3 | 65276374 | 0      | 0      | 0      |
| YRI | CBWD3 | 65281374 | 0      | 0      | 0      |
| YRI | CBWD3 | 65286374 | 0      | 0      | 0      |
| YRI | CBWD3 | 65291374 | 0      | 0      | 0      |
| YRI | CBWD3 | 65296374 | 0      | 0      | 0      |
| YRI | CBWD3 | 65301374 | 0      | 0      | 0      |
| YRI | CBWD3 | 65306374 | 0      | 0      | 0      |
| YRI | CBWD3 | 65311374 | 0      | 0      | 0      |
| YRI | CBWD3 | 65316374 | 0      | 0      | 0      |
| YRI | CBWD3 | 65321374 | 0      | 0      | 0      |
| YRI | CBWD3 | 65326374 | 0      | 0      | 0      |
| YRI | CBWD3 | 65331374 | 0      | 0      | 0      |
| YRI | CBWD3 | 65336374 | 0      | 0      | 0      |
| YRI | CBWD3 | 65341374 | 0      | 0      | 0      |

## 2\_TajimasD\_data

|     |       |          |        |        |         |
|-----|-------|----------|--------|--------|---------|
| YRI | CBWD3 | 65346374 | 0      | 0      | 0       |
| YRI | CBWD3 | 65351374 | 0      | 0      | 0       |
| YRI | CBWD3 | 65356374 | 0      | 0      | 0       |
| YRI | CBWD3 | 65361374 | 0      | 0      | 0       |
| YRI | CBWD3 | 65366374 | 0      | 0      | 0       |
| YRI | CBWD3 | 65371374 | 0      | 0      | 0       |
| YRI | CBWD3 | 65376374 | 0      | 0      | 0       |
| YRI | CBWD3 | 65381374 | 0      | 0      | 0       |
| YRI | CBWD3 | 65386374 | 0      | 0      | 0       |
| YRI | CBWD3 | 65391374 | 0      | 0      | 0       |
| YRI | CBWD3 | 65396374 | 0      | 0      | 0       |
| YRI | CBWD3 | 65401374 | 0      | 0      | 0       |
| YRI | CBWD3 | 65406374 | 0      | 0      | 0       |
| YRI | CBWD3 | 65411374 | 0      | 0      | 0       |
| YRI | CBWD3 | 65416374 | 0      | 0      | 0       |
| YRI | CBWD3 | 65421374 | 0      | 0      | 0       |
| YRI | CBWD3 | 65426374 | 0      | 0      | 0       |
| YRI | CBWD3 | 65431374 | 0      | 0      | 0       |
| YRI | CBWD3 | 65436374 | 0      | 0      | 0       |
| YRI | CBWD3 | 65441374 | 0      | 0      | 0       |
| YRI | CBWD3 | 65446374 | 0      | 0      | 0       |
| YRI | CBWD3 | 65451374 | 0      | 0      | 0       |
| YRI | CBWD3 | 65456374 | 0      | 0      | 0       |
| YRI | CBWD3 | 65461374 | 0      | 0      | 0       |
| YRI | CBWD3 | 65466374 | 0      | 0      | 0       |
| YRI | CBWD3 | 65471374 | 0.9335 | 1.5126 | -0.8623 |
| YRI | CBWD3 | 65476374 | 1.156  | 2.1848 | -1.1551 |
| YRI | CBWD3 | 65481374 | 0.9536 | 1.3445 | -0.6349 |
| YRI | CBWD3 | 65486374 | 0.7497 | 0.8403 | -0.2046 |
| YRI | CBWD3 | 65491374 | 0.0185 | 0.1681 | -0.8893 |
| YRI | CBWD3 | 65496374 | 0      | 0      | 0       |
| YRI | CBWD3 | 65501374 | 0      | 0      | 0       |
| YRI | CBWD3 | 65506374 | 0.2029 | 0.3361 | -0.5347 |
| YRI | CBWD3 | 65511374 | 0.2029 | 0.3361 | -0.5347 |
| YRI | CBWD3 | 65516374 | 0      | 0      | 0       |
| YRI | CBWD3 | 65521374 | 0.0185 | 0.1681 | -0.8893 |
| YRI | CBWD3 | 65526374 | 0.2901 | 1.8487 | -1.9936 |
| YRI | CBWD3 | 65531374 | 0.2715 | 1.6806 | -1.9385 |
| YRI | CBWD3 | 65536374 | 0      | 0      | 0       |
| YRI | CBWD3 | 65541374 | 0      | 0      | 0       |
| YRI | CBWD3 | 65546374 | 0.6899 | 1.3445 | -1.0632 |
| YRI | CBWD3 | 65551374 | 1.5091 | 2.8571 | -1.219  |
| YRI | CBWD3 | 65556374 | 1.275  | 3.6974 | -1.7656 |
| YRI | CBWD3 | 65561374 | 0.4834 | 2.3529 | -1.979  |
| YRI | CBWD3 | 65566374 | 0.0276 | 0.1681 | -0.8352 |
| YRI | CBWD3 | 65571374 | 0.0093 | 0.1681 | -0.944  |
| YRI | CBWD3 | 65576374 | 0.7565 | 1.1764 | -0.751  |
| YRI | CBWD3 | 65581374 | 0.7472 | 1.0084 | -0.5207 |
| YRI | CBWD3 | 65586374 | 0      | 0      | 0       |

## 2\_TajimasD\_data

|     |       |          |        |         |         |
|-----|-------|----------|--------|---------|---------|
| YRI | CBWD3 | 65591374 | 1.3191 | 3.6974  | -1.7335 |
| YRI | CBWD3 | 65596374 | 4.2391 | 8.9073  | -1.5548 |
| YRI | CBWD3 | 65601374 | 4.2741 | 9.0754  | -1.5717 |
| YRI | CBWD3 | 65606374 | 3.5053 | 7.5628  | -1.5708 |
| YRI | CBWD3 | 65611374 | 7.0987 | 11.9324 | -1.2253 |
| YRI | CBWD3 | 65616374 | 8.5476 | 13.9492 | -1.1813 |
| YRI | CBWD3 | 65621374 | 5.4186 | 10.2518 | -1.4126 |
| YRI | CBWD3 | 65626374 | 3.5619 | 9.9157  | -1.9157 |
| YRI | CBWD3 | 65631374 | 6.1178 | 11.9324 | -1.474  |
| YRI | CBWD3 | 65636374 | 4.8784 | 8.067   | -1.1635 |
| YRI | CBWD3 | 65641374 | 0.6676 | 2.3529  | -1.784  |
| YRI | CBWD3 | 65646374 | 0.1636 | 0.8403  | -1.5284 |
| YRI | CBWD3 | 65651374 | 0.072  | 0.1681  | -0.5713 |
| YRI | CBWD3 | 65656374 | 0.072  | 0.1681  | -0.5713 |
| YRI | CBWD3 | 65661374 | 0.0093 | 0.1681  | -0.944  |
| YRI | CBWD3 | 65666374 | 0.0093 | 0.1681  | -0.944  |
| YRI | CBWD3 | 65671374 | 0      | 0       | 0       |
| YRI | CBWD3 | 65676374 | 0      | 0       | 0       |
| YRI | CBWD3 | 65681374 | 0      | 0       | 0       |
| YRI | CBWD3 | 65686374 | 0.0813 | 0.3361  | -1.0229 |
| YRI | CBWD3 | 65691374 | 0.0996 | 0.5042  | -1.2715 |
| YRI | CBWD3 | 65696374 | 0.0183 | 0.1681  | -0.8905 |
| YRI | CBWD3 | 65701374 | 0      | 0       | 0       |
| YRI | CBWD3 | 65706374 | 0      | 0       | 0       |
| YRI | CBWD3 | 65711374 | 0.1463 | 0.1681  | -0.1296 |
| YRI | CBWD3 | 65716374 | 0.1463 | 0.1681  | -0.1296 |
| YRI | CBWD3 | 65721374 | 0      | 0       | 0       |
| YRI | CBWD3 | 65726374 | 0      | 0       | 0       |
| YRI | CBWD3 | 65731374 | 0.0093 | 0.1681  | -0.944  |
| YRI | CBWD3 | 65736374 | 0.3019 | 0.5042  | -0.6358 |
| YRI | CBWD3 | 65741374 | 0.8473 | 0.8403  | 0.0158  |
| YRI | CBWD3 | 65746374 | 0.776  | 1.1764  | -0.7161 |
| YRI | CBWD3 | 65751374 | 0.3025 | 1.0084  | -1.4073 |
| YRI | CBWD3 | 65756374 | 0.5291 | 1.1764  | -1.1577 |
| YRI | CBWD3 | 65761374 | 0.5757 | 1.5126  | -1.3951 |
| YRI | CBWD3 | 65766374 | 0.6255 | 2.689   | -1.9611 |
| YRI | CBWD3 | 65771374 | 0.8296 | 2.5209  | -1.6938 |
| YRI | CBWD3 | 65776374 | 0.3874 | 1.1764  | -1.4112 |
| YRI | CBWD3 | 65781374 | 0.0833 | 1.0084  | -1.8444 |
| YRI | CBWD3 | 65786374 | 0.0278 | 0.3361  | -1.2377 |
| YRI | CBWD3 | 65791374 | 0      | 0.1681  | -0.9993 |
| YRI | CBWD3 | 65796374 | 0.3386 | 0.8403  | -1.1332 |
| YRI | CBWD3 | 65801374 | 0.3662 | 0.8403  | -1.0708 |
| YRI | CBWD3 | 65806374 | 0.0369 | 0.3361  | -1.2012 |
| YRI | CBWD3 | 65811374 | 0.0278 | 0.3361  | -1.2377 |
| YRI | CBWD3 | 65816374 | 0.1603 | 0.5042  | -1.0808 |
| YRI | CBWD3 | 65821374 | 0.5879 | 0.8403  | -0.5701 |
| YRI | CBWD3 | 65826374 | 0.4462 | 0.5042  | -0.1823 |
| YRI | CBWD3 | 65831374 | 0.0093 | 0.1681  | -0.944  |



## 2\_TajimasD\_data

|     |       |          |        |        |         |
|-----|-------|----------|--------|--------|---------|
| YRI | CBWD3 | 65836374 | 0.0458 | 0.3361 | -1.1654 |
| YRI | CBWD3 | 65841374 | 0.0458 | 0.3361 | -1.1654 |
| YRI | CBWD3 | 65846374 | 0.0093 | 0.1681 | -0.944  |
| YRI | CBWD3 | 65851374 | 0      | 0      | 0       |
| YRI | CBWD3 | 65856374 | 0.1314 | 0.3361 | -0.8218 |
| YRI | CBWD3 | 65861374 | 0.1587 | 0.5042 | -1.0858 |
| YRI | CBWD3 | 65866374 | 0.0458 | 0.3361 | -1.1654 |
| YRI | CBWD3 | 65871374 | 0.1377 | 1.0084 | -1.7359 |
| YRI | CBWD3 | 65876374 | 1.1716 | 2.1848 | -1.1376 |
| YRI | CBWD3 | 65881374 | 1.0524 | 1.3445 | -0.4744 |
| YRI | CBWD3 | 65886374 | 0.2066 | 0.1681 | 0.2289  |
| YRI | CBWD3 | 65891374 | 0.6311 | 0.8403 | -0.4725 |
| YRI | CBWD3 | 65896374 | 0.9827 | 1.8487 | -1.1077 |
| YRI | CBWD3 | 65901374 | 0.5674 | 1.3445 | -1.2622 |
| YRI | CBWD3 | 65906374 | 0.0093 | 0.1681 | -0.944  |
| YRI | CBWD3 | 65911374 | 0      | 0      | 0       |
| YRI | CBWD3 | 65916374 | 1.7041 | 1.8487 | -0.185  |
| YRI | CBWD3 | 65921374 | 1.7041 | 1.8487 | -0.185  |
| YRI | CBWD3 | 65926374 | 0      | 0      | 0       |
| YRI | CBWD3 | 65931374 | 0      | 0      | 0       |
| YRI | CBWD3 | 65936374 | 0      | 0      | 0       |
| YRI | CBWD3 | 65941374 | 0      | 0      | 0       |
| YRI | CBWD3 | 65946374 | 0      | 0      | 0       |
| YRI | CBWD3 | 65951374 | 0      | 0      | 0       |
| YRI | CBWD3 | 65956374 | 0      | 0      | 0       |
| YRI | CBWD3 | 65961374 | 0      | 0      | 0       |
| YRI | CBWD3 | 65966374 | 0.1997 | 0.8403 | -1.4469 |
| YRI | CBWD3 | 65971374 | 1.9839 | 2.0167 | -0.0392 |
| YRI | CBWD3 | 65976374 | 1.8483 | 1.6806 | 0.2307  |
| YRI | CBWD3 | 65981374 | 0.5824 | 1.1764 | -1.0624 |
| YRI | CBWD3 | 65986374 | 0.6506 | 1.0084 | -0.7133 |
| YRI | CBWD3 | 65991374 | 0.6717 | 1.8487 | -1.5055 |
| YRI | CBWD3 | 65996374 | 0.724  | 2.3529 | -1.7243 |
| YRI | CBWD3 | 66001374 | 0.7442 | 1.5126 | -1.1442 |
| YRI | CBWD3 | 66006374 | 1.3696 | 2.8571 | -1.3452 |
| YRI | CBWD3 | 66011374 | 2.5039 | 3.6974 | -0.8699 |
| YRI | CBWD3 | 66016374 | 3.0739 | 3.1932 | -0.0984 |
| YRI | CBWD3 | 66021374 | 1.38   | 1.6806 | -0.4135 |
| YRI | CBWD3 | 66026374 | 0.474  | 0.3361 | 0.5536  |
| YRI | CBWD3 | 66031374 | 1.5378 | 1.5126 | 0.0375  |
| YRI | CBWD3 | 66036374 | 2.1512 | 2.3529 | -0.2135 |
| YRI | CBWD3 | 66041374 | 1.2129 | 1.8487 | -0.8132 |
| YRI | CBWD3 | 66046374 | 0.7947 | 1.3445 | -0.893  |
| YRI | CBWD3 | 66051374 | 0.6785 | 0.8403 | -0.3654 |
| YRI | CBWD3 | 66056374 | 0.2323 | 0.6722 | -1.1516 |
| YRI | CBWD3 | 66061374 | 0.2323 | 0.6722 | -1.1516 |
| YRI | CBWD3 | 66066374 | 0.6728 | 0.6722 | 0.0016  |
| YRI | CBWD3 | 66071374 | 1.0562 | 0.8403 | 0.4876  |
| YRI | CBWD3 | 66076374 | 0.3926 | 0.3361 | 0.2268  |

## 2\_TajimasD\_data

|     |       |          |        |        |         |
|-----|-------|----------|--------|--------|---------|
| YRI | CBWD3 | 66081374 | 0.0185 | 0.3361 | -1.275  |
| YRI | CBWD3 | 66086374 | 0.4464 | 0.8403 | -0.8897 |
| YRI | CBWD3 | 66091374 | 0.4279 | 0.5042 | -0.2398 |
| YRI | CBWD3 | 66096374 | 0.3471 | 0.5042 | -0.4937 |
| YRI | CBWD3 | 66101374 | 0.8368 | 0.6722 | 0.4309  |
| YRI | CBWD3 | 66106374 | 0.499  | 0.3361 | 0.654   |
| YRI | CBWD3 | 66111374 | 0.2929 | 1.0084 | -1.4265 |
| YRI | CBWD3 | 66116374 | 1.1321 | 2.1848 | -1.182  |
| YRI | CBWD3 | 66121374 | 0.9706 | 1.5126 | -0.8071 |
| YRI | CBWD3 | 66126374 | 0.4837 | 1.0084 | -1.0461 |
| YRI | CBWD3 | 66131374 | 0.3615 | 0.8403 | -1.0814 |
| YRI | CBWD3 | 66136374 | 0.2837 | 0.3361 | -0.2104 |
| YRI | CBWD3 | 66141374 | 0.3802 | 0.5042 | -0.3897 |
| YRI | CBWD3 | 66146374 | 0.0965 | 0.1681 | -0.4256 |
| YRI | CBWD3 | 66151374 | 0.0093 | 0.1681 | -0.944  |
| YRI | CBWD3 | 66156374 | 0.0093 | 0.1681 | -0.944  |
| YRI | CBWD3 | 66161374 | 0.4565 | 0.1681 | 1.7145  |
| YRI | CBWD3 | 66166374 | 0.4565 | 0.1681 | 1.7145  |
| YRI | CBWD3 | 66171374 | 0      | 0      | 0       |
| YRI | CBWD3 | 66176374 | 0      | 0      | 0       |
| YRI | CBWD3 | 66181374 | 0.0273 | 0.1681 | -0.837  |
| YRI | CBWD3 | 66186374 | 0.0273 | 0.1681 | -0.837  |
| YRI | CBWD3 | 66191374 | 0      | 0      | 0       |
| YRI | CBWD3 | 66196374 | 0      | 0      | 0       |
| YRI | CBWD3 | 66201374 | 0      | 0      | 0       |
| YRI | CBWD3 | 66206374 | 0      | 0      | 0       |
| YRI | CBWD3 | 66211374 | 0      | 0      | 0       |
| YRI | CBWD3 | 66216374 | 0      | 0      | 0       |
| YRI | CBWD3 | 66221374 | 0      | 0      | 0       |
| YRI | CBWD3 | 66226374 | 0      | 0      | 0       |
| CEU | CBWD3 | 67746866 | 0.4172 | 0.3411 | 0.3051  |
| CEU | CBWD3 | 67751866 | 0.404  | 0.1706 | 1.3864  |
| CEU | CBWD3 | 67756866 | 0.404  | 0.1706 | 1.3864  |
| CEU | CBWD3 | 67761866 | 0.0101 | 0.1706 | -0.9534 |
| CEU | CBWD3 | 67766866 | 0.7209 | 0.6822 | 0.1011  |
| CEU | CBWD3 | 67771866 | 0.7108 | 0.5117 | 0.6244  |
| CEU | CBWD3 | 67776866 | 0.0101 | 0.1706 | -0.9534 |
| CEU | CBWD3 | 67781866 | 0.0598 | 0.3411 | -1.1277 |
| CEU | CBWD3 | 67786866 | 0.5947 | 0.6822 | -0.2285 |
| CEU | CBWD3 | 67791866 | 0.7444 | 1.3645 | -1.0032 |
| CEU | CBWD3 | 67796866 | 0.8052 | 1.3645 | -0.9048 |
| CEU | CBWD3 | 67801866 | 0.6059 | 0.5117 | 0.2954  |
| CEU | CBWD3 | 67806866 | 0.0101 | 0.1706 | -0.9534 |
| CEU | CBWD3 | 67811866 | 0.0101 | 0.1706 | -0.9534 |
| CEU | CBWD3 | 67816866 | 0      | 0      | 0       |
| CEU | CBWD3 | 67821866 | 0.3191 | 0.3411 | -0.0882 |
| CEU | CBWD3 | 67826866 | 1.9955 | 1.5351 | 0.6827  |
| CEU | CBWD3 | 67831866 | 2.1519 | 1.5351 | 0.9146  |
| CEU | CBWD3 | 67836866 | 1.638  | 1.5351 | 0.1526  |

## 2\_TajimasD\_data

|     |       |          |        |        |         |
|-----|-------|----------|--------|--------|---------|
| CEU | CBWD3 | 67841866 | 1.9629 | 1.7056 | 0.3524  |
| CEU | CBWD3 | 67846866 | 1.9175 | 1.7056 | 0.2902  |
| CEU | CBWD3 | 67851866 | 1.1569 | 1.3645 | -0.3359 |
| CEU | CBWD3 | 67856866 | 0.2224 | 0.3411 | -0.4758 |
| CEU | CBWD3 | 67861866 | 0.449  | 0.3411 | 0.4325  |
| CEU | CBWD3 | 67866866 | 1.1495 | 0.5117 | 2.0003  |
| CEU | CBWD3 | 67871866 | 0.8831 | 0.3411 | 2.1727  |
| CEU | CBWD3 | 67876866 | 0.0101 | 0.1706 | -0.9534 |
| CEU | CBWD3 | 67881866 | 0.0303 | 0.3411 | -1.2459 |
| CEU | CBWD3 | 67886866 | 1.1668 | 1.0234 | 0.2849  |
| CEU | CBWD3 | 67891866 | 1.3078 | 1.3645 | -0.0917 |
| CEU | CBWD3 | 67896866 | 4.7798 | 4.4346 | 0.2166  |
| CEU | CBWD3 | 67901866 | 5.1847 | 4.6052 | 0.3518  |
| CEU | CBWD3 | 67906866 | 0.5762 | 0.8528 | -0.6229 |
| CEU | CBWD3 | 67911866 | 2.1006 | 2.729  | -0.594  |
| CEU | CBWD3 | 67916866 | 3.9041 | 4.9463 | -0.5944 |
| CEU | CBWD3 | 67921866 | 2.241  | 3.5818 | -1.0106 |
| CEU | CBWD3 | 67926866 | 1.0326 | 2.0467 | -1.2067 |
| CEU | CBWD3 | 67931866 | 2.1713 | 2.729  | -0.5271 |
| CEU | CBWD3 | 67936866 | 2.5452 | 2.8996 | -0.3187 |
| CEU | CBWD3 | 67941866 | 1.0394 | 1.5351 | -0.735  |
| CEU | CBWD3 | 67946866 | 1.2731 | 2.0467 | -0.9205 |
| CEU | CBWD3 | 67951866 | 1.7229 | 2.0467 | -0.3853 |
| CEU | CBWD3 | 67956866 | 0.5201 | 0.6822 | -0.4233 |
| CEU | CBWD3 | 67961866 | 1.0493 | 1.3645 | -0.5099 |
| CEU | CBWD3 | 67966866 | 1.5038 | 1.8762 | -0.4741 |
| CEU | CBWD3 | 67971866 | 0.4646 | 0.6822 | -0.5682 |
| CEU | CBWD3 | 67976866 | 0.1973 | 0.6822 | -1.2662 |
| CEU | CBWD3 | 67981866 | 0.9878 | 1.0234 | -0.0707 |
| CEU | CBWD3 | 67986866 | 0.7906 | 0.3411 | 1.8019  |
| CEU | CBWD3 | 67991866 | 0      | 0      | 0       |
| CEU | CBWD3 | 67996866 | 0      | 0      | 0       |
| CEU | CBWD3 | 68001866 | 0      | 0      | 0       |
| CEU | CBWD3 | 68006866 | 0      | 0      | 0       |
| CEU | CBWD3 | 68011866 | 0      | 0      | 0       |
| CEU | CBWD3 | 68016866 | 0      | 0      | 0       |
| CEU | CBWD3 | 68021866 | 0      | 0      | 0       |
| CEU | CBWD3 | 68026866 | 0      | 0      | 0       |
| CEU | CBWD3 | 68031866 | 0      | 0      | 0       |
| CEU | CBWD3 | 68036866 | 0      | 0      | 0       |
| CEU | CBWD3 | 68041866 | 0      | 0      | 0       |
| CEU | CBWD3 | 68046866 | 0      | 0      | 0       |
| CEU | CBWD3 | 68051866 | 0      | 0      | 0       |
| CEU | CBWD3 | 68056866 | 0      | 0      | 0       |
| CEU | CBWD3 | 68061866 | 0      | 0      | 0       |
| CEU | CBWD3 | 68066866 | 0      | 0      | 0       |
| CEU | CBWD3 | 68071866 | 0      | 0      | 0       |
| CEU | CBWD3 | 68076866 | 0      | 0      | 0       |
| CEU | CBWD3 | 68081866 | 0      | 0      | 0       |

## 2\_TajimasD\_data

|     |       |          |         |         |         |
|-----|-------|----------|---------|---------|---------|
| CEU | CBWD3 | 68086866 | 0       | 0       | 0       |
| CEU | CBWD3 | 68091866 | 0       | 0       | 0       |
| CEU | CBWD3 | 68096866 | 0       | 0       | 0       |
| CEU | CBWD3 | 68101866 | 0       | 0       | 0       |
| CEU | CBWD3 | 68106866 | 0       | 0       | 0       |
| CEU | CBWD3 | 68111866 | 0       | 0       | 0       |
| CEU | CBWD3 | 68116866 | 0       | 0       | 0       |
| CEU | CBWD3 | 68121866 | 0       | 0       | 0       |
| CEU | CBWD3 | 68126866 | 0       | 0       | 0       |
| CEU | CBWD3 | 68131866 | 0       | 0       | 0       |
| CEU | CBWD3 | 68136866 | 1.1185  | 1.0234  | 0.189   |
| CEU | CBWD3 | 68141866 | 2.4914  | 3.0701  | -0.4964 |
| CEU | CBWD3 | 68146866 | 2.6407  | 4.4346  | -1.1256 |
| CEU | CBWD3 | 68151866 | 3.4444  | 6.4814  | -1.3612 |
| CEU | CBWD3 | 68156866 | 3.4558  | 6.6519  | -1.3993 |
| CEU | CBWD3 | 68161866 | 2.3995  | 4.2641  | -1.2104 |
| CEU | CBWD3 | 68166866 | 2.9122  | 5.458   | -1.3309 |
| CEU | CBWD3 | 68171866 | 4.791   | 7.5047  | -1.0647 |
| CEU | CBWD3 | 68176866 | 5.6687  | 8.6987  | -1.0381 |
| CEU | CBWD3 | 68181866 | 4.1123  | 8.0164  | -1.442  |
| CEU | CBWD3 | 68186866 | 3.0954  | 5.2874  | -1.1786 |
| CEU | CBWD3 | 68191866 | 3.7805  | 5.458   | -0.877  |
| CEU | CBWD3 | 68196866 | 3.6782  | 6.3108  | -1.2087 |
| CEU | CBWD3 | 68201866 | 5.113   | 8.187   | -1.1136 |
| CEU | CBWD3 | 68206866 | 5.6836  | 9.7221  | -1.248  |
| CEU | CBWD3 | 68211866 | 3.9332  | 6.9931  | -1.2803 |
| CEU | CBWD3 | 68216866 | 4.4409  | 5.6286  | -0.6041 |
| CEU | CBWD3 | 68221866 | 4.8204  | 8.0164  | -1.1805 |
| CEU | CBWD3 | 68226866 | 3.7141  | 7.6753  | -1.5226 |
| CEU | CBWD3 | 68231866 | 2.4572  | 4.6052  | -1.3041 |
| CEU | CBWD3 | 68236866 | 3.5617  | 4.4346  | -0.5477 |
| CEU | CBWD3 | 68241866 | 3.6139  | 4.2641  | -0.4221 |
| CEU | CBWD3 | 68246866 | 2.8128  | 3.9229  | -0.7743 |
| CEU | CBWD3 | 68251866 | 5.382   | 5.7991  | -0.2066 |
| CEU | CBWD3 | 68256866 | 4.3851  | 5.1169  | -0.4051 |
| CEU | CBWD3 | 68261866 | 1.2573  | 3.7524  | -1.8076 |
| CEU | CBWD3 | 68266866 | 1.0175  | 3.7524  | -1.9814 |
| CEU | CBWD3 | 68271866 | 2.0486  | 4.9463  | -1.6526 |
| CEU | CBWD3 | 68276866 | 3.6392  | 6.8225  | -1.3621 |
| CEU | CBWD3 | 68281866 | 3.5861  | 6.3108  | -1.251  |
| CEU | CBWD3 | 68286866 | 5.0379  | 6.8225  | -0.7636 |
| CEU | CBWD3 | 68291866 | 5.2127  | 6.3108  | -0.5042 |
| CEU | CBWD3 | 68296866 | 3.4875  | 6.1402  | -1.2483 |
| CEU | CBWD3 | 68301866 | 3.7343  | 7.6753  | -1.5148 |
| CEU | CBWD3 | 68306866 | 3.1439  | 5.458   | -1.2098 |
| CEU | CBWD3 | 68311866 | 2.1045  | 4.0935  | -1.3375 |
| CEU | CBWD3 | 68316866 | 9.2319  | 9.2104  | 0.007   |
| CEU | CBWD3 | 68321866 | 10.7269 | 11.2571 | -0.1429 |
| CEU | CBWD3 | 68326866 | 4.7838  | 7.3342  | -1.0219 |

## 2\_TajimasD\_data

|     |       |          |         |         |         |
|-----|-------|----------|---------|---------|---------|
| CEU | CBWD3 | 68331866 | 5.3647  | 7.5047  | -0.8396 |
| CEU | CBWD3 | 68336866 | 4.2459  | 8.187   | -1.4278 |
| CEU | CBWD3 | 68341866 | 4.2298  | 8.5281  | -1.4997 |
| CEU | CBWD3 | 68346866 | 5.223   | 9.3809  | -1.3283 |
| CEU | CBWD3 | 68351866 | 3.4912  | 8.0164  | -1.6714 |
| CEU | CBWD3 | 68356866 | 7.979   | 9.3809  | -0.4479 |
| CEU | CBWD3 | 68361866 | 10.9724 | 8.8692  | 0.7077  |
| CEU | CBWD3 | 68366866 | 6.3968  | 6.3108  | 0.0395  |
| CEU | CBWD3 | 68371866 | 5.1565  | 6.6519  | -0.6547 |
| CEU | CBWD3 | 68376866 | 5.0115  | 5.9697  | -0.4624 |
| CEU | CBWD3 | 68381866 | 12.2486 | 7.1636  | 2.0815  |
| CEU | CBWD3 | 68386866 | 21.6935 | 10.916  | 2.9891  |
| CEU | CBWD3 | 68391866 | 16.0266 | 10.5749 | 1.5576  |
| CEU | CBWD3 | 68396866 | 7.0598  | 7.6753  | -0.2366 |
| CEU | CBWD3 | 68401866 | 4.3659  | 6.8225  | -1.0512 |
| CEU | CBWD3 | 68406866 | 4.6236  | 6.9931  | -0.9914 |
| CEU | CBWD3 | 68411866 | 25.0793 | 13.645  | 2.5696  |
| CEU | CBWD3 | 68416866 | 36.8209 | 16.2034 | 3.9339  |
| CEU | CBWD3 | 68421866 | 16.6734 | 8.8692  | 2.6261  |
| CEU | CBWD3 | 68426866 | 6.0719  | 5.9697  | 0.0493  |
| CEU | CBWD3 | 68431866 | 6.6473  | 7.6753  | -0.3951 |
| CEU | CBWD3 | 68436866 | 7.7858  | 11.2571 | -0.9354 |
| CEU | CBWD3 | 68441866 | 8.1936  | 12.4511 | -1.0434 |
| CEU | CBWD3 | 68446866 | 6.4923  | 10.2337 | -1.1022 |
| CEU | CBWD3 | 68451866 | 5.2618  | 9.2104  | -1.2831 |
| CEU | CBWD3 | 68456866 | 4.1214  | 10.0632 | -1.7782 |
| CEU | CBWD3 | 68461866 | 4.0206  | 10.0632 | -1.8083 |
| CEU | CBWD3 | 68466866 | 4.6059  | 8.187   | -1.2974 |
| CEU | CBWD3 | 68471866 | 5.4117  | 7.6753  | -0.8701 |
| CEU | CBWD3 | 68476866 | 8.6042  | 8.8692  | -0.0892 |
| CEU | CBWD3 | 68481866 | 7.9705  | 6.8225  | 0.4912  |
| CEU | CBWD3 | 68486866 | 6.7497  | 7.3342  | -0.2342 |
| CEU | CBWD3 | 68491866 | 7.012   | 9.5515  | -0.7978 |
| CEU | CBWD3 | 68496866 | 4.5172  | 9.7221  | -1.6085 |
| CEU | CBWD3 | 68501866 | 4.1154  | 11.0866 | -1.9056 |
| CEU | CBWD3 | 68506866 | 4.4743  | 11.5982 | -1.8665 |
| CEU | CBWD3 | 68511866 | 3.275   | 7.1636  | -1.5918 |
| CEU | CBWD3 | 68516866 | 0.5391  | 1.1939  | -1.1669 |
| CEU | CBWD3 | 68521866 | 0       | 0       | 0       |
| CEU | CBWD3 | 68526866 | 0       | 0       | 0       |
| CEU | CBWD3 | 68531866 | 0       | 0       | 0       |
| CEU | CBWD3 | 68536866 | 0       | 0       | 0       |
| CEU | CBWD3 | 68541866 | 0       | 0       | 0       |
| CEU | CBWD3 | 68546866 | 0       | 0       | 0       |
| CEU | CBWD3 | 68551866 | 0       | 0       | 0       |
| CEU | CBWD3 | 68556866 | 0       | 0       | 0       |
| CEU | CBWD3 | 68561866 | 0       | 0       | 0       |
| CEU | CBWD3 | 68566866 | 0       | 0       | 0       |
| CEU | CBWD3 | 68571866 | 0       | 0       | 0       |

## 2\_TajimasD\_data

|     |       |          |        |        |         |
|-----|-------|----------|--------|--------|---------|
| CEU | CBWD3 | 68576866 | 0      | 0      | 0       |
| CEU | CBWD3 | 68581866 | 0      | 0      | 0       |
| CEU | CBWD3 | 68586866 | 0      | 0      | 0       |
| CEU | CBWD3 | 68591866 | 0      | 0      | 0       |
| CEU | CBWD3 | 68596866 | 0      | 0      | 0       |
| CEU | CBWD3 | 68601866 | 0      | 0      | 0       |
| CEU | CBWD3 | 68606866 | 0      | 0      | 0       |
| CEU | CBWD3 | 68611866 | 0      | 0      | 0       |
| CEU | CBWD3 | 68616866 | 0      | 0      | 0       |
| CEU | CBWD3 | 68621866 | 0      | 0      | 0       |
| CEU | CBWD3 | 68626866 | 0      | 0      | 0       |
| CEU | CBWD3 | 68631866 | 0      | 0      | 0       |
| CEU | CBWD3 | 68636866 | 0      | 0      | 0       |
| CEU | CBWD3 | 68641866 | 0      | 0      | 0       |
| CEU | CBWD3 | 68646866 | 0      | 0      | 0       |
| CEU | CBWD3 | 68651866 | 0      | 0      | 0       |
| CEU | CBWD3 | 68656866 | 0      | 0      | 0       |
| CEU | CBWD3 | 68661866 | 0.2544 | 1.1939 | -1.6742 |
| CEU | CBWD3 | 68666866 | 2.0511 | 4.4346 | -1.4955 |
| CEU | CBWD3 | 68671866 | 2.4597 | 4.6052 | -1.3026 |
| CEU | CBWD3 | 68676866 | 1.4424 | 2.5584 | -1.1117 |
| CEU | CBWD3 | 68681866 | 0.8299 | 1.8762 | -1.3321 |
| CEU | CBWD3 | 68686866 | 1.9151 | 2.8996 | -0.8854 |
| CEU | CBWD3 | 68691866 | 2.9755 | 3.5818 | -0.457  |
| CEU | CBWD3 | 68696866 | 2.3028 | 2.3879 | -0.0896 |
| CEU | CBWD3 | 68701866 | 1.3791 | 1.5351 | -0.2313 |
| CEU | CBWD3 | 68706866 | 0.8951 | 1.7056 | -1.1101 |
| CEU | CBWD3 | 68711866 | 0.7483 | 1.8762 | -1.436  |
| CEU | CBWD3 | 68716866 | 0.3589 | 1.7056 | -1.8445 |
| CEU | CBWD3 | 68721866 | 0.455  | 1.7056 | -1.7128 |
| CEU | CBWD3 | 68726866 | 0.6273 | 1.7056 | -1.4769 |
| CEU | CBWD3 | 68731866 | 2.4455 | 3.2407 | -0.652  |
| CEU | CBWD3 | 68736866 | 2.596  | 4.2641 | -1.0828 |
| CEU | CBWD3 | 68741866 | 4.5585 | 5.7991 | -0.6145 |
| CEU | CBWD3 | 68746866 | 4.5847 | 5.7991 | -0.6015 |
| CEU | CBWD3 | 68751866 | 2.6063 | 5.1169 | -1.3897 |
| CEU | CBWD3 | 68756866 | 3.268  | 5.1169 | -1.0234 |
| CEU | CBWD3 | 68761866 | 1.6696 | 3.2407 | -1.2883 |
| CEU | CBWD3 | 68766866 | 1.0952 | 3.2407 | -1.7593 |
| CEU | CBWD3 | 68771866 | 1.7304 | 3.4112 | -1.3201 |
| CEU | CBWD3 | 68776866 | 1.6799 | 3.2407 | -1.2798 |
| CEU | CBWD3 | 68781866 | 2.678  | 5.6286 | -1.5009 |
| CEU | CBWD3 | 68786866 | 3.3754 | 6.8225 | -1.475  |
| CEU | CBWD3 | 68791866 | 3.1657 | 5.7991 | -1.3043 |
| CHB | CBWD3 | 67746866 | 0.5899 | 0.5082 | 0.2565  |
| CHB | CBWD3 | 67751866 | 0.3912 | 0.3388 | 0.2102  |
| CHB | CBWD3 | 67756866 | 0.3912 | 0.3388 | 0.2102  |
| CHB | CBWD3 | 67761866 | 0.0194 | 0.1694 | -0.8913 |
| CHB | CBWD3 | 67766866 | 0.7634 | 0.6777 | 0.224   |

## 2\_TajimasD\_data

|     |       |          |        |        |         |
|-----|-------|----------|--------|--------|---------|
| CHB | CBWD3 | 67771866 | 0.744  | 0.5082 | 0.7402  |
| CHB | CBWD3 | 67776866 | 0.2755 | 0.6777 | -1.0515 |
| CHB | CBWD3 | 67781866 | 0.2949 | 1.0165 | -1.436  |
| CHB | CBWD3 | 67786866 | 0.5785 | 1.1859 | -1.0842 |
| CHB | CBWD3 | 67791866 | 0.8102 | 1.5247 | -1.0615 |
| CHB | CBWD3 | 67796866 | 0.6773 | 1.1859 | -0.9078 |
| CHB | CBWD3 | 67801866 | 0.4262 | 0.5082 | -0.2574 |
| CHB | CBWD3 | 67806866 | 0      | 0      | 0       |
| CHB | CBWD3 | 67811866 | 0      | 0      | 0       |
| CHB | CBWD3 | 67816866 | 0.0097 | 0.1694 | -0.949  |
| CHB | CBWD3 | 67821866 | 0.6299 | 0.5082 | 0.382   |
| CHB | CBWD3 | 67826866 | 2.3377 | 1.5247 | 1.2078  |
| CHB | CBWD3 | 67831866 | 2.008  | 1.3553 | 1.0578  |
| CHB | CBWD3 | 67836866 | 1.1133 | 1.1859 | -0.1296 |
| CHB | CBWD3 | 67841866 | 1.5049 | 1.5247 | -0.0294 |
| CHB | CBWD3 | 67846866 | 1.7822 | 1.6942 | 0.1208  |
| CHB | CBWD3 | 67851866 | 1.1001 | 1.1859 | -0.1532 |
| CHB | CBWD3 | 67856866 | 0.1447 | 0.1694 | -0.1468 |
| CHB | CBWD3 | 67861866 | 0.4222 | 0.3388 | 0.3345  |
| CHB | CBWD3 | 67866866 | 0.9564 | 0.5082 | 1.407   |
| CHB | CBWD3 | 67871866 | 0.6789 | 0.3388 | 1.3643  |
| CHB | CBWD3 | 67876866 | 0.0097 | 0.1694 | -0.949  |
| CHB | CBWD3 | 67881866 | 0.0194 | 0.3388 | -1.2812 |
| CHB | CBWD3 | 67886866 | 1.3219 | 1.5247 | -0.3013 |
| CHB | CBWD3 | 67891866 | 1.4679 | 1.8636 | -0.5049 |
| CHB | CBWD3 | 67896866 | 3.7478 | 3.2189 | 0.4348  |
| CHB | CBWD3 | 67901866 | 4.1091 | 3.2189 | 0.7319  |
| CHB | CBWD3 | 67906866 | 0.5654 | 1.0165 | -0.8977 |
| CHB | CBWD3 | 67911866 | 1.8903 | 1.6942 | 0.2691  |
| CHB | CBWD3 | 67916866 | 3.2273 | 3.3883 | -0.1268 |
| CHB | CBWD3 | 67921866 | 1.5199 | 3.3883 | -1.4714 |
| CHB | CBWD3 | 67926866 | 0.7342 | 2.033  | -1.5488 |
| CHB | CBWD3 | 67931866 | 2.155  | 2.8801 | -0.6538 |
| CHB | CBWD3 | 67936866 | 2.3015 | 3.0495 | -0.6433 |
| CHB | CBWD3 | 67941866 | 0.8329 | 1.5247 | -1.0278 |
| CHB | CBWD3 | 67946866 | 0.525  | 1.3553 | -1.3457 |
| CHB | CBWD3 | 67951866 | 0.795  | 2.033  | -1.4763 |
| CHB | CBWD3 | 67956866 | 0.3566 | 1.1859 | -1.4803 |
| CHB | CBWD3 | 67961866 | 1.5069 | 1.8636 | -0.4551 |
| CHB | CBWD3 | 67966866 | 1.9735 | 2.5412 | -0.5669 |
| CHB | CBWD3 | 67971866 | 0.4666 | 0.6777 | -0.5519 |
| CHB | CBWD3 | 67976866 | 0.0097 | 0.1694 | -0.949  |
| CHB | CBWD3 | 67981866 | 1.1976 | 0.8471 | 0.7904  |
| CHB | CBWD3 | 67986866 | 1.1976 | 0.8471 | 0.7904  |
| CHB | CBWD3 | 67991866 | 0.0097 | 0.1694 | -0.949  |
| CHB | CBWD3 | 67996866 | 0      | 0      | 0       |
| CHB | CBWD3 | 68001866 | 0      | 0      | 0       |
| CHB | CBWD3 | 68006866 | 0      | 0      | 0       |
| CHB | CBWD3 | 68011866 | 0      | 0      | 0       |

## 2\_TajimasD\_data

|     |       |          |         |        |         |
|-----|-------|----------|---------|--------|---------|
| CHB | CBWD3 | 68016866 | 0       | 0      | 0       |
| CHB | CBWD3 | 68021866 | 0       | 0      | 0       |
| CHB | CBWD3 | 68026866 | 0       | 0      | 0       |
| CHB | CBWD3 | 68031866 | 0       | 0      | 0       |
| CHB | CBWD3 | 68036866 | 0       | 0      | 0       |
| CHB | CBWD3 | 68041866 | 0       | 0      | 0       |
| CHB | CBWD3 | 68046866 | 0       | 0      | 0       |
| CHB | CBWD3 | 68051866 | 0       | 0      | 0       |
| CHB | CBWD3 | 68056866 | 0       | 0      | 0       |
| CHB | CBWD3 | 68061866 | 0       | 0      | 0       |
| CHB | CBWD3 | 68066866 | 0       | 0      | 0       |
| CHB | CBWD3 | 68071866 | 0       | 0      | 0       |
| CHB | CBWD3 | 68076866 | 0       | 0      | 0       |
| CHB | CBWD3 | 68081866 | 0       | 0      | 0       |
| CHB | CBWD3 | 68086866 | 0       | 0      | 0       |
| CHB | CBWD3 | 68091866 | 0       | 0      | 0       |
| CHB | CBWD3 | 68096866 | 0       | 0      | 0       |
| CHB | CBWD3 | 68101866 | 0       | 0      | 0       |
| CHB | CBWD3 | 68106866 | 0       | 0      | 0       |
| CHB | CBWD3 | 68111866 | 0       | 0      | 0       |
| CHB | CBWD3 | 68116866 | 0       | 0      | 0       |
| CHB | CBWD3 | 68121866 | 0       | 0      | 0       |
| CHB | CBWD3 | 68126866 | 0       | 0      | 0       |
| CHB | CBWD3 | 68131866 | 0       | 0      | 0       |
| CHB | CBWD3 | 68136866 | 2.1289  | 1.8636 | 0.3385  |
| CHB | CBWD3 | 68141866 | 5.2292  | 4.4048 | 0.5188  |
| CHB | CBWD3 | 68146866 | 5.8667  | 5.2519 | 0.3316  |
| CHB | CBWD3 | 68151866 | 7.7929  | 6.4378 | 0.6093  |
| CHB | CBWD3 | 68156866 | 6.8985  | 6.6072 | 0.1279  |
| CHB | CBWD3 | 68161866 | 3.0445  | 4.4048 | -0.856  |
| CHB | CBWD3 | 68166866 | 5.2056  | 4.7436 | 0.2725  |
| CHB | CBWD3 | 68171866 | 8.2878  | 6.7766 | 0.6487  |
| CHB | CBWD3 | 68176866 | 10.2935 | 8.3013 | 0.7105  |
| CHB | CBWD3 | 68181866 | 10.3821 | 8.6402 | 0.5988  |
| CHB | CBWD3 | 68186866 | 7.0782  | 7.2848 | -0.083  |
| CHB | CBWD3 | 68191866 | 7.4698  | 6.946  | 0.2199  |
| CHB | CBWD3 | 68196866 | 10.0811 | 8.1319 | 0.7085  |
| CHB | CBWD3 | 68201866 | 10.744  | 8.979  | 0.5855  |
| CHB | CBWD3 | 68206866 | 9.3015  | 7.4543 | 0.7271  |
| CHB | CBWD3 | 68211866 | 6.6465  | 5.4213 | 0.6425  |
| CHB | CBWD3 | 68216866 | 7.0335  | 5.7601 | 0.6327  |
| CHB | CBWD3 | 68221866 | 8.4581  | 7.7931 | 0.2513  |
| CHB | CBWD3 | 68226866 | 7.71    | 8.6402 | -0.3197 |
| CHB | CBWD3 | 68231866 | 5.2753  | 6.6072 | -0.585  |
| CHB | CBWD3 | 68236866 | 3.9539  | 5.0825 | -0.6266 |
| CHB | CBWD3 | 68241866 | 4.411   | 5.0825 | -0.3728 |
| CHB | CBWD3 | 68246866 | 5.055   | 5.0825 | -0.0153 |
| CHB | CBWD3 | 68251866 | 8.7114  | 6.0989 | 1.2332  |
| CHB | CBWD3 | 68256866 | 6.9328  | 4.5742 | 1.4362  |



## 2\_TajimasD\_data

|     |       |          |         |         |         |
|-----|-------|----------|---------|---------|---------|
| CHB | CBWD3 | 68261866 | 1.7198  | 2.7106  | -0.9388 |
| CHB | CBWD3 | 68266866 | 1.4479  | 4.5742  | -1.9037 |
| CHB | CBWD3 | 68271866 | 3.4681  | 6.2684  | -1.2897 |
| CHB | CBWD3 | 68276866 | 6.505   | 7.2848  | -0.3135 |
| CHB | CBWD3 | 68281866 | 6.561   | 6.4378  | 0.0554  |
| CHB | CBWD3 | 68286866 | 7.8233  | 5.7601  | 1.025   |
| CHB | CBWD3 | 68291866 | 7.9846  | 6.2684  | 0.7904  |
| CHB | CBWD3 | 68296866 | 6.9246  | 7.2848  | -0.1448 |
| CHB | CBWD3 | 68301866 | 7.1965  | 8.3013  | -0.394  |
| CHB | CBWD3 | 68306866 | 4.7872  | 6.946   | -0.9062 |
| CHB | CBWD3 | 68311866 | 4.0032  | 6.6072  | -1.1437 |
| CHB | CBWD3 | 68316866 | 14.6313 | 11.6896 | 0.7629  |
| CHB | CBWD3 | 68321866 | 16.2589 | 13.5532 | 0.6102  |
| CHB | CBWD3 | 68326866 | 6.3899  | 9.3178  | -0.9385 |
| CHB | CBWD3 | 68331866 | 6.9269  | 9.8261  | -0.8845 |
| CHB | CBWD3 | 68336866 | 7.1968  | 8.4708  | -0.446  |
| CHB | CBWD3 | 68341866 | 7.2591  | 6.7766  | 0.2071  |
| CHB | CBWD3 | 68346866 | 10.6663 | 9.4872  | 0.3717  |
| CHB | CBWD3 | 68351866 | 8.9242  | 8.8096  | 0.0387  |
| CHB | CBWD3 | 68356866 | 10.9197 | 7.9625  | 1.0958  |
| CHB | CBWD3 | 68361866 | 12.4738 | 6.4378  | 2.714   |
| CHB | CBWD3 | 68366866 | 8.6069  | 4.5742  | 2.4556  |
| CHB | CBWD3 | 68371866 | 7.7647  | 4.913   | 1.6312  |
| CHB | CBWD3 | 68376866 | 6.7065  | 5.9295  | 0.3762  |
| CHB | CBWD3 | 68381866 | 13.3554 | 9.6567  | 1.1469  |
| CHB | CBWD3 | 68386866 | 23.0175 | 12.5367 | 2.5446  |
| CHB | CBWD3 | 68391866 | 16.4013 | 9.4872  | 2.1795  |
| CHB | CBWD3 | 68396866 | 6.7598  | 7.2848  | -0.211  |
| CHB | CBWD3 | 68401866 | 6.6189  | 8.4708  | -0.6483 |
| CHB | CBWD3 | 68406866 | 7.4485  | 9.1484  | -0.5542 |
| CHB | CBWD3 | 68411866 | 25.8505 | 14.9085 | 2.254   |
| CHB | CBWD3 | 68416866 | 37.1403 | 17.1109 | 3.6172  |
| CHB | CBWD3 | 68421866 | 17.4223 | 8.979   | 2.8009  |
| CHB | CBWD3 | 68426866 | 7.5804  | 6.2684  | 0.6043  |
| CHB | CBWD3 | 68431866 | 10.8804 | 9.6567  | 0.3794  |
| CHB | CBWD3 | 68436866 | 13.2827 | 12.3673 | 0.2251  |
| CHB | CBWD3 | 68441866 | 14.9397 | 13.3838 | 0.3551  |
| CHB | CBWD3 | 68446866 | 12.5696 | 11.3508 | 0.3249  |
| CHB | CBWD3 | 68451866 | 7.8968  | 9.1484  | -0.4081 |
| CHB | CBWD3 | 68456866 | 6.7792  | 8.979   | -0.7297 |
| CHB | CBWD3 | 68461866 | 7.7394  | 8.3013  | -0.2004 |
| CHB | CBWD3 | 68466866 | 8.5031  | 7.2848  | 0.4897  |
| CHB | CBWD3 | 68471866 | 9.8648  | 8.1319  | 0.6299  |
| CHB | CBWD3 | 68476866 | 11.6097 | 8.8096  | 0.9454  |
| CHB | CBWD3 | 68481866 | 9.1466  | 8.4708  | 0.2366  |
| CHB | CBWD3 | 68486866 | 8.3352  | 9.8261  | -0.4549 |
| CHB | CBWD3 | 68491866 | 9.3234  | 11.012  | -0.4632 |
| CHB | CBWD3 | 68496866 | 8.6948  | 10.6731 | -0.5587 |
| CHB | CBWD3 | 68501866 | 9.4316  | 9.9955  | -0.1693 |

## 2\_TajimasD\_data

|     |       |          |         |         |         |
|-----|-------|----------|---------|---------|---------|
| CHB | CBWD3 | 68506866 | 11.5064 | 11.8591 | -0.0902 |
| CHB | CBWD3 | 68511866 | 8.1294  | 8.979   | -0.2818 |
| CHB | CBWD3 | 68516866 | 0.6219  | 1.5247  | -1.3412 |
| CHB | CBWD3 | 68521866 | 0       | 0       | 0       |
| CHB | CBWD3 | 68526866 | 0       | 0       | 0       |
| CHB | CBWD3 | 68531866 | 0       | 0       | 0       |
| CHB | CBWD3 | 68536866 | 0       | 0       | 0       |
| CHB | CBWD3 | 68541866 | 0       | 0       | 0       |
| CHB | CBWD3 | 68546866 | 0       | 0       | 0       |
| CHB | CBWD3 | 68551866 | 0       | 0       | 0       |
| CHB | CBWD3 | 68556866 | 0       | 0       | 0       |
| CHB | CBWD3 | 68561866 | 0       | 0       | 0       |
| CHB | CBWD3 | 68566866 | 0       | 0       | 0       |
| CHB | CBWD3 | 68571866 | 0       | 0       | 0       |
| CHB | CBWD3 | 68576866 | 0       | 0       | 0       |
| CHB | CBWD3 | 68581866 | 0       | 0       | 0       |
| CHB | CBWD3 | 68586866 | 0       | 0       | 0       |
| CHB | CBWD3 | 68591866 | 0       | 0       | 0       |
| CHB | CBWD3 | 68596866 | 0       | 0       | 0       |
| CHB | CBWD3 | 68601866 | 0       | 0       | 0       |
| CHB | CBWD3 | 68606866 | 0       | 0       | 0       |
| CHB | CBWD3 | 68611866 | 0       | 0       | 0       |
| CHB | CBWD3 | 68616866 | 0       | 0       | 0       |
| CHB | CBWD3 | 68621866 | 0       | 0       | 0       |
| CHB | CBWD3 | 68626866 | 0       | 0       | 0       |
| CHB | CBWD3 | 68631866 | 0       | 0       | 0       |
| CHB | CBWD3 | 68636866 | 0       | 0       | 0       |
| CHB | CBWD3 | 68641866 | 0       | 0       | 0       |
| CHB | CBWD3 | 68646866 | 0       | 0       | 0       |
| CHB | CBWD3 | 68651866 | 0       | 0       | 0       |
| CHB | CBWD3 | 68656866 | 0       | 0       | 0       |
| CHB | CBWD3 | 68661866 | 0.1354  | 1.1859  | -1.8751 |
| CHB | CBWD3 | 68666866 | 1.119   | 3.5577  | -1.843  |
| CHB | CBWD3 | 68671866 | 1.6764  | 3.5577  | -1.4218 |
| CHB | CBWD3 | 68676866 | 1.1936  | 2.033   | -1.001  |
| CHB | CBWD3 | 68681866 | 0.8686  | 2.3718  | -1.5867 |
| CHB | CBWD3 | 68686866 | 2.0221  | 3.3883  | -1.0759 |
| CHB | CBWD3 | 68691866 | 2.7323  | 3.2189  | -0.4001 |
| CHB | CBWD3 | 68696866 | 2.0988  | 2.3718  | -0.2882 |
| CHB | CBWD3 | 68701866 | 1.2732  | 2.033   | -0.9061 |
| CHB | CBWD3 | 68706866 | 1.0482  | 2.3718  | -1.3972 |
| CHB | CBWD3 | 68711866 | 0.8249  | 1.8636  | -1.3252 |
| CHB | CBWD3 | 68716866 | 0.068   | 1.1859  | -1.9954 |
| CHB | CBWD3 | 68721866 | 0.1329  | 1.1859  | -1.8796 |
| CHB | CBWD3 | 68726866 | 0.5553  | 1.6942  | -1.563  |
| CHB | CBWD3 | 68731866 | 1.9518  | 3.7271  | -1.2897 |
| CHB | CBWD3 | 68736866 | 1.8803  | 5.2519  | -1.8184 |
| CHB | CBWD3 | 68741866 | 3.4607  | 6.2684  | -1.2931 |
| CHB | CBWD3 | 68746866 | 3.6206  | 6.6072  | -1.3117 |

## 2\_TajimasD\_data

|     |       |          |        |        |         |
|-----|-------|----------|--------|--------|---------|
| CHB | CBWD3 | 68751866 | 2.6254 | 6.0989 | -1.6396 |
| CHB | CBWD3 | 68756866 | 3.8578 | 4.7436 | -0.5225 |
| CHB | CBWD3 | 68761866 | 2.257  | 3.0495 | -0.6816 |
| CHB | CBWD3 | 68766866 | 1.1294 | 3.7271 | -1.8872 |
| CHB | CBWD3 | 68771866 | 1.4242 | 4.066  | -1.7815 |
| CHB | CBWD3 | 68776866 | 1.7637 | 4.5742 | -1.7114 |
| CHB | CBWD3 | 68781866 | 2.3023 | 6.0989 | -1.7922 |
| CHB | CBWD3 | 68786866 | 2.229  | 6.0989 | -1.8268 |
| CHB | CBWD3 | 68791866 | 2.3954 | 5.5907 | -1.6303 |
| YRI | CBWD3 | 67746866 | 0.5556 | 0.5042 | 0.1615  |
| YRI | CBWD3 | 67751866 | 0.5145 | 0.3361 | 0.7162  |
| YRI | CBWD3 | 67756866 | 0.5145 | 0.3361 | 0.7162  |
| YRI | CBWD3 | 67761866 | 0.0806 | 0.1681 | -0.5202 |
| YRI | CBWD3 | 67766866 | 0.9597 | 0.6722 | 0.7527  |
| YRI | CBWD3 | 67771866 | 0.8791 | 0.5042 | 1.1782  |
| YRI | CBWD3 | 67776866 | 0.3541 | 0.6722 | -0.8328 |
| YRI | CBWD3 | 67781866 | 0.4079 | 0.8403 | -0.9766 |
| YRI | CBWD3 | 67786866 | 1.0138 | 2.0167 | -1.1991 |
| YRI | CBWD3 | 67791866 | 1.4538 | 2.8571 | -1.2691 |
| YRI | CBWD3 | 67796866 | 1.0042 | 1.6806 | -0.9305 |
| YRI | CBWD3 | 67801866 | 0.598  | 0.8403 | -0.5473 |
| YRI | CBWD3 | 67806866 | 0.1832 | 0.5042 | -1.0088 |
| YRI | CBWD3 | 67811866 | 0.0956 | 0.3361 | -0.9655 |
| YRI | CBWD3 | 67816866 | 0      | 0      | 0       |
| YRI | CBWD3 | 67821866 | 0.2561 | 1.0084 | -1.4998 |
| YRI | CBWD3 | 67826866 | 2.1626 | 2.8571 | -0.6281 |
| YRI | CBWD3 | 67831866 | 2.3956 | 2.3529 | 0.0452  |
| YRI | CBWD3 | 67836866 | 1.2714 | 2.0167 | -0.8911 |
| YRI | CBWD3 | 67841866 | 1.5611 | 2.1848 | -0.7003 |
| YRI | CBWD3 | 67846866 | 1.7994 | 1.5126 | 0.4271  |
| YRI | CBWD3 | 67851866 | 1.0576 | 1.1764 | -0.2125 |
| YRI | CBWD3 | 67856866 | 0.5235 | 0.8403 | -0.7155 |
| YRI | CBWD3 | 67861866 | 0.8802 | 0.6722 | 0.5445  |
| YRI | CBWD3 | 67866866 | 1.3122 | 0.5042 | 2.5393  |
| YRI | CBWD3 | 67871866 | 0.9185 | 0.3361 | 2.3381  |
| YRI | CBWD3 | 67876866 | 0.1782 | 0.3361 | -0.6339 |
| YRI | CBWD3 | 67881866 | 0.1874 | 0.5042 | -0.9956 |
| YRI | CBWD3 | 67886866 | 1.0175 | 2.1848 | -1.3106 |
| YRI | CBWD3 | 67891866 | 1.1964 | 2.689  | -1.4185 |
| YRI | CBWD3 | 67896866 | 5.0366 | 5.7141 | -0.3378 |
| YRI | CBWD3 | 67901866 | 5.3022 | 6.2183 | -0.4235 |
| YRI | CBWD3 | 67906866 | 0.5796 | 1.5126 | -1.3893 |
| YRI | CBWD3 | 67911866 | 1.9399 | 2.1848 | -0.275  |
| YRI | CBWD3 | 67916866 | 3.2992 | 3.5293 | -0.1745 |
| YRI | CBWD3 | 67921866 | 2.044  | 2.5209 | -0.4776 |
| YRI | CBWD3 | 67926866 | 1.3557 | 1.5126 | -0.2336 |
| YRI | CBWD3 | 67931866 | 2.347  | 2.1848 | 0.1821  |
| YRI | CBWD3 | 67936866 | 2.4371 | 2.689  | -0.2394 |
| YRI | CBWD3 | 67941866 | 0.9332 | 2.0167 | -1.2955 |

## 2\_TajimasD\_data

|     |       |          |         |         |         |
|-----|-------|----------|---------|---------|---------|
| YRI | CBWD3 | 67946866 | 1.6292  | 3.0251  | -1.2042 |
| YRI | CBWD3 | 67951866 | 2.3664  | 3.3612  | -0.7859 |
| YRI | CBWD3 | 67956866 | 0.7835  | 1.1764  | -0.7027 |
| YRI | CBWD3 | 67961866 | 1.5137  | 2.1848  | -0.7535 |
| YRI | CBWD3 | 67966866 | 1.7606  | 2.8571  | -0.9916 |
| YRI | CBWD3 | 67971866 | 0.2931  | 1.1764  | -1.5798 |
| YRI | CBWD3 | 67976866 | 0.0646  | 0.8403  | -1.752  |
| YRI | CBWD3 | 67981866 | 0.7481  | 1.3445  | -0.9687 |
| YRI | CBWD3 | 67986866 | 0.7479  | 1.1764  | -0.7664 |
| YRI | CBWD3 | 67991866 | 0.0183  | 0.1681  | -0.8905 |
| YRI | CBWD3 | 67996866 | 0       | 0       | 0       |
| YRI | CBWD3 | 68001866 | 0       | 0       | 0       |
| YRI | CBWD3 | 68006866 | 0       | 0       | 0       |
| YRI | CBWD3 | 68011866 | 0       | 0       | 0       |
| YRI | CBWD3 | 68016866 | 0       | 0       | 0       |
| YRI | CBWD3 | 68021866 | 0       | 0       | 0       |
| YRI | CBWD3 | 68026866 | 0       | 0       | 0       |
| YRI | CBWD3 | 68031866 | 0       | 0       | 0       |
| YRI | CBWD3 | 68036866 | 0       | 0       | 0       |
| YRI | CBWD3 | 68041866 | 0       | 0       | 0       |
| YRI | CBWD3 | 68046866 | 0       | 0       | 0       |
| YRI | CBWD3 | 68051866 | 0       | 0       | 0       |
| YRI | CBWD3 | 68056866 | 0       | 0       | 0       |
| YRI | CBWD3 | 68061866 | 0       | 0       | 0       |
| YRI | CBWD3 | 68066866 | 0       | 0       | 0       |
| YRI | CBWD3 | 68071866 | 0       | 0       | 0       |
| YRI | CBWD3 | 68076866 | 0       | 0       | 0       |
| YRI | CBWD3 | 68081866 | 0       | 0       | 0       |
| YRI | CBWD3 | 68086866 | 0       | 0       | 0       |
| YRI | CBWD3 | 68091866 | 0       | 0       | 0       |
| YRI | CBWD3 | 68096866 | 0       | 0       | 0       |
| YRI | CBWD3 | 68101866 | 0       | 0       | 0       |
| YRI | CBWD3 | 68106866 | 0       | 0       | 0       |
| YRI | CBWD3 | 68111866 | 0       | 0       | 0       |
| YRI | CBWD3 | 68116866 | 0       | 0       | 0       |
| YRI | CBWD3 | 68121866 | 0       | 0       | 0       |
| YRI | CBWD3 | 68126866 | 0       | 0       | 0       |
| YRI | CBWD3 | 68131866 | 0       | 0       | 0       |
| YRI | CBWD3 | 68136866 | 1.7521  | 1.6806  | 0.0984  |
| YRI | CBWD3 | 68141866 | 5.1558  | 5.378   | -0.1169 |
| YRI | CBWD3 | 68146866 | 7.8968  | 9.7476  | -0.567  |
| YRI | CBWD3 | 68151866 | 10.4052 | 11.9324 | -0.3871 |
| YRI | CBWD3 | 68156866 | 8.0186  | 9.4115  | -0.4408 |
| YRI | CBWD3 | 68161866 | 3.8902  | 6.3864  | -1.1266 |
| YRI | CBWD3 | 68166866 | 6.5986  | 8.4031  | -0.6342 |
| YRI | CBWD3 | 68171866 | 9.7379  | 11.0921 | -0.3677 |
| YRI | CBWD3 | 68176866 | 12.1905 | 12.2685 | -0.0193 |
| YRI | CBWD3 | 68181866 | 13.1574 | 12.6047 | 0.1331  |
| YRI | CBWD3 | 68186866 | 8.7745  | 8.7392  | 0.012   |

## 2\_TajimasD\_data

|     |       |          |         |         |         |
|-----|-------|----------|---------|---------|---------|
| YRI | CBWD3 | 68191866 | 7.8885  | 7.0586  | 0.3421  |
| YRI | CBWD3 | 68196866 | 11.5904 | 9.4115  | 0.6896  |
| YRI | CBWD3 | 68201866 | 12.864  | 10.756  | 0.5891  |
| YRI | CBWD3 | 68206866 | 10.5823 | 9.7476  | 0.2557  |
| YRI | CBWD3 | 68211866 | 7.3838  | 7.7309  | -0.1317 |
| YRI | CBWD3 | 68216866 | 7.4991  | 8.5712  | -0.37   |
| YRI | CBWD3 | 68221866 | 9.499   | 10.924  | -0.3925 |
| YRI | CBWD3 | 68226866 | 10.1376 | 11.2602 | -0.3005 |
| YRI | CBWD3 | 68231866 | 7.5305  | 8.5712  | -0.3591 |
| YRI | CBWD3 | 68236866 | 4.9789  | 6.2183  | -0.573  |
| YRI | CBWD3 | 68241866 | 5.4335  | 6.7225  | -0.5554 |
| YRI | CBWD3 | 68246866 | 6.7224  | 7.5628  | -0.3253 |
| YRI | CBWD3 | 68251866 | 9.7797  | 9.9157  | -0.041  |
| YRI | CBWD3 | 68256866 | 8.2723  | 9.4115  | -0.3605 |
| YRI | CBWD3 | 68261866 | 3.5449  | 5.8822  | -1.1357 |
| YRI | CBWD3 | 68266866 | 3.0774  | 5.7141  | -1.3148 |
| YRI | CBWD3 | 68271866 | 5.0947  | 7.5628  | -0.9555 |
| YRI | CBWD3 | 68276866 | 8.9376  | 11.0921 | -0.585  |
| YRI | CBWD3 | 68281866 | 9.4098  | 10.2518 | -0.2461 |
| YRI | CBWD3 | 68286866 | 9.597   | 10.0837 | -0.1445 |
| YRI | CBWD3 | 68291866 | 9.6251  | 11.4282 | -0.476  |
| YRI | CBWD3 | 68296866 | 10.0322 | 11.9324 | -0.4817 |
| YRI | CBWD3 | 68301866 | 10.5025 | 11.5963 | -0.2848 |
| YRI | CBWD3 | 68306866 | 7.0769  | 8.7392  | -0.5635 |
| YRI | CBWD3 | 68311866 | 5.6404  | 8.235   | -0.929  |
| YRI | CBWD3 | 68316866 | 18.062  | 16.134  | 0.3671  |
| YRI | CBWD3 | 68321866 | 21.2808 | 18.6549 | 0.435   |
| YRI | CBWD3 | 68326866 | 9.2261  | 12.1005 | -0.7191 |
| YRI | CBWD3 | 68331866 | 9.4566  | 12.6047 | -0.7578 |
| YRI | CBWD3 | 68336866 | 9.1623  | 11.5963 | -0.6338 |
| YRI | CBWD3 | 68341866 | 8.3562  | 11.5963 | -0.8437 |
| YRI | CBWD3 | 68346866 | 11.7087 | 13.7811 | -0.4585 |
| YRI | CBWD3 | 68351866 | 10.1229 | 11.7644 | -0.4217 |
| YRI | CBWD3 | 68356866 | 12.0807 | 10.924  | 0.3186  |
| YRI | CBWD3 | 68361866 | 13.1223 | 9.5795  | 1.103   |
| YRI | CBWD3 | 68366866 | 9.4487  | 8.4031  | 0.3675  |
| YRI | CBWD3 | 68371866 | 8.1526  | 9.2434  | -0.351  |
| YRI | CBWD3 | 68376866 | 7.1841  | 9.5795  | -0.7458 |
| YRI | CBWD3 | 68381866 | 14.168  | 10.5879 | 1.0153  |
| YRI | CBWD3 | 68386866 | 23.7604 | 12.1005 | 2.9171  |
| YRI | CBWD3 | 68391866 | 17.8987 | 11.4282 | 1.7082  |
| YRI | CBWD3 | 68396866 | 7.8731  | 10.0837 | -0.6561 |
| YRI | CBWD3 | 68401866 | 7.9808  | 12.1005 | -1.0307 |
| YRI | CBWD3 | 68406866 | 10.3897 | 13.1089 | -0.6308 |
| YRI | CBWD3 | 68411866 | 28.3128 | 16.4701 | 2.2108  |
| YRI | CBWD3 | 68416866 | 38.2597 | 17.3104 | 3.7289  |
| YRI | CBWD3 | 68421866 | 18.1404 | 10.924  | 1.9875  |
| YRI | CBWD3 | 68426866 | 9.0228  | 9.5795  | -0.1733 |
| YRI | CBWD3 | 68431866 | 12.7673 | 13.2769 | -0.1168 |

## 2\_TajimasD\_data

|     |       |          |         |         |         |
|-----|-------|----------|---------|---------|---------|
| YRI | CBWD3 | 68436866 | 14.4831 | 15.6298 | -0.225  |
| YRI | CBWD3 | 68441866 | 15.8388 | 16.4701 | -0.1179 |
| YRI | CBWD3 | 68446866 | 13.7484 | 15.2937 | -0.3096 |
| YRI | CBWD3 | 68451866 | 8.974   | 12.2685 | -0.8136 |
| YRI | CBWD3 | 68456866 | 7.9519  | 11.5963 | -0.949  |
| YRI | CBWD3 | 68461866 | 9.1281  | 10.924  | -0.4946 |
| YRI | CBWD3 | 68466866 | 9.3637  | 10.2518 | -0.2596 |
| YRI | CBWD3 | 68471866 | 11.1385 | 12.2685 | -0.2791 |
| YRI | CBWD3 | 68476866 | 13.8298 | 12.9408 | 0.2088  |
| YRI | CBWD3 | 68481866 | 10.858  | 9.7476  | 0.3402  |
| YRI | CBWD3 | 68486866 | 9.9825  | 12.4366 | -0.5983 |
| YRI | CBWD3 | 68491866 | 10.9406 | 14.1172 | -0.6869 |
| YRI | CBWD3 | 68496866 | 9.5284  | 13.7811 | -0.9408 |
| YRI | CBWD3 | 68501866 | 11      | 15.9659 | -0.955  |
| YRI | CBWD3 | 68506866 | 13.7821 | 18.4868 | -0.7862 |
| YRI | CBWD3 | 68511866 | 9.5768  | 13.7811 | -0.9301 |
| YRI | CBWD3 | 68516866 | 1.1737  | 2.689   | -1.4401 |
| YRI | CBWD3 | 68521866 | 0       | 0       | 0       |
| YRI | CBWD3 | 68526866 | 0       | 0       | 0       |
| YRI | CBWD3 | 68531866 | 0       | 0       | 0       |
| YRI | CBWD3 | 68536866 | 0       | 0       | 0       |
| YRI | CBWD3 | 68541866 | 0       | 0       | 0       |
| YRI | CBWD3 | 68546866 | 0       | 0       | 0       |
| YRI | CBWD3 | 68551866 | 0       | 0       | 0       |
| YRI | CBWD3 | 68556866 | 0       | 0       | 0       |
| YRI | CBWD3 | 68561866 | 0       | 0       | 0       |
| YRI | CBWD3 | 68566866 | 0       | 0       | 0       |
| YRI | CBWD3 | 68571866 | 0       | 0       | 0       |
| YRI | CBWD3 | 68576866 | 0       | 0       | 0       |
| YRI | CBWD3 | 68581866 | 0       | 0       | 0       |
| YRI | CBWD3 | 68586866 | 0       | 0       | 0       |
| YRI | CBWD3 | 68591866 | 0       | 0       | 0       |
| YRI | CBWD3 | 68596866 | 0       | 0       | 0       |
| YRI | CBWD3 | 68601866 | 0       | 0       | 0       |
| YRI | CBWD3 | 68606866 | 0       | 0       | 0       |
| YRI | CBWD3 | 68611866 | 0       | 0       | 0       |
| YRI | CBWD3 | 68616866 | 0       | 0       | 0       |
| YRI | CBWD3 | 68621866 | 0       | 0       | 0       |
| YRI | CBWD3 | 68626866 | 0       | 0       | 0       |
| YRI | CBWD3 | 68631866 | 0       | 0       | 0       |
| YRI | CBWD3 | 68636866 | 0       | 0       | 0       |
| YRI | CBWD3 | 68641866 | 0       | 0       | 0       |
| YRI | CBWD3 | 68646866 | 0       | 0       | 0       |
| YRI | CBWD3 | 68651866 | 0       | 0       | 0       |
| YRI | CBWD3 | 68656866 | 0       | 0       | 0       |
| YRI | CBWD3 | 68661866 | 0.1464  | 1.3445  | -1.9459 |
| YRI | CBWD3 | 68666866 | 1.5378  | 5.2099  | -1.9876 |
| YRI | CBWD3 | 68671866 | 2.1106  | 5.7141  | -1.7969 |
| YRI | CBWD3 | 68676866 | 1.5687  | 3.6974  | -1.5516 |

## 2\_TajimasD\_data

|     |         |          |         |         |         |
|-----|---------|----------|---------|---------|---------|
| YRI | CBWD3   | 68681866 | 1.1047  | 3.1932  | -1.7224 |
| YRI | CBWD3   | 68686866 | 2.5445  | 3.8654  | -0.927  |
| YRI | CBWD3   | 68691866 | 3.2321  | 4.2016  | -0.6333 |
| YRI | CBWD3   | 68696866 | 2.4836  | 3.5293  | -0.7929 |
| YRI | CBWD3   | 68701866 | 1.7463  | 3.1932  | -1.1933 |
| YRI | CBWD3   | 68706866 | 1.1097  | 3.1932  | -1.7183 |
| YRI | CBWD3   | 68711866 | 1.0419  | 3.1932  | -1.7742 |
| YRI | CBWD3   | 68716866 | 0.1562  | 1.6806  | -2.0971 |
| YRI | CBWD3   | 68721866 | 0.173   | 1.5126  | -1.9947 |
| YRI | CBWD3   | 68726866 | 0.7739  | 2.0167  | -1.486  |
| YRI | CBWD3   | 68731866 | 2.7295  | 3.6974  | -0.7055 |
| YRI | CBWD3   | 68736866 | 2.9228  | 5.378   | -1.2921 |
| YRI | CBWD3   | 68741866 | 4.1517  | 7.2267  | -1.2408 |
| YRI | CBWD3   | 68746866 | 5.0221  | 7.8989  | -1.0702 |
| YRI | CBWD3   | 68751866 | 3.9614  | 7.2267  | -1.3176 |
| YRI | CBWD3   | 68756866 | 3.1629  | 6.5544  | -1.4952 |
| YRI | CBWD3   | 68761866 | 1.8086  | 4.3696  | -1.6171 |
| YRI | CBWD3   | 68766866 | 2.0718  | 4.2016  | -1.3912 |
| YRI | CBWD3   | 68771866 | 2.4153  | 5.2099  | -1.5127 |
| YRI | CBWD3   | 68776866 | 2.4765  | 5.8822  | -1.6549 |
| YRI | CBWD3   | 68781866 | 2.5496  | 6.3864  | -1.7317 |
| YRI | CBWD3   | 68786866 | 3.0416  | 7.3947  | -1.7201 |
| YRI | CBWD3   | 68791866 | 3.0102  | 7.0586  | -1.669  |
| CEU | CLEC18A | 69455232 | 7.8924  | 8.0164  | -0.0458 |
| CEU | CLEC18A | 69460232 | 11.8712 | 9.8926  | 0.6016  |
| CEU | CLEC18A | 69465232 | 11.1668 | 9.8926  | 0.3874  |
| CEU | CLEC18A | 69470232 | 10.3867 | 10.0632 | 0.0968  |
| CEU | CLEC18A | 69475232 | 12.7627 | 10.2337 | 0.7451  |
| CEU | CLEC18A | 69480232 | 11.1146 | 8.187   | 1.0606  |
| CEU | CLEC18A | 69485232 | 7.256   | 6.3108  | 0.434   |
| CEU | CLEC18A | 69490232 | 8.6207  | 6.6519  | 0.862   |
| CEU | CLEC18A | 69495232 | 7.8584  | 6.9931  | 0.3621  |
| CEU | CLEC18A | 69500232 | 8.3599  | 8.8692  | -0.1714 |
| CEU | CLEC18A | 69505232 | 10.2274 | 10.5749 | -0.0993 |
| CEU | CLEC18A | 69510232 | 9.5854  | 9.5515  | 0.0107  |
| CEU | CLEC18A | 69515232 | 9.355   | 8.187   | 0.4231  |
| CEU | CLEC18A | 69520232 | 8.6955  | 7.6753  | 0.3921  |
| CEU | CLEC18A | 69525232 | 6.8462  | 6.4814  | 0.1635  |
| CEU | CLEC18A | 69530232 | 9.162   | 8.3576  | 0.2859  |
| CEU | CLEC18A | 69535232 | 12.6184 | 11.9394 | 0.1731  |
| CEU | CLEC18A | 69540232 | 11.3315 | 10.5749 | 0.2162  |
| CEU | CLEC18A | 69545232 | 10.7949 | 8.5281  | 0.7909  |
| CEU | CLEC18A | 69550232 | 14.1789 | 11.2571 | 0.7873  |
| CEU | CLEC18A | 69555232 | 13.7217 | 12.1099 | 0.4055  |
| CEU | CLEC18A | 69560232 | 12.1173 | 9.7221  | 0.7402  |
| CEU | CLEC18A | 69565232 | 11.4583 | 8.8692  | 0.8712  |
| CEU | CLEC18A | 69570232 | 5.9903  | 6.9931  | -0.4196 |
| CEU | CLEC18A | 69575232 | 5.5391  | 6.3108  | -0.3543 |
| CEU | CLEC18A | 69580232 | 11.2286 | 8.8692  | 0.7939  |

## 2\_TajimasD\_data

|     |         |          |        |        |         |
|-----|---------|----------|--------|--------|---------|
| CEU | CLEC18A | 69585232 | 10.907 | 8.8692 | 0.6857  |
| CEU | CLEC18A | 69590232 | 6.4088 | 6.9931 | -0.2445 |
| CEU | CLEC18A | 69595232 | 6.3315 | 7.3342 | -0.4018 |
| CEU | CLEC18A | 69600232 | 6.9233 | 8.187  | -0.4578 |
| CEU | CLEC18A | 69605232 | 9.0614 | 8.8692 | 0.0647  |
| CEU | CLEC18A | 69610232 | 7.9542 | 7.5047 | 0.1764  |
| CEU | CLEC18A | 69615232 | 4.8369 | 6.4814 | -0.7371 |
| CEU | CLEC18A | 69620232 | 7.135  | 6.9931 | 0.0594  |
| CEU | CLEC18A | 69625232 | 8.0486 | 7.3342 | 0.2862  |
| CEU | CLEC18A | 69630232 | 8.37   | 8.187  | 0.0663  |
| CEU | CLEC18A | 69635232 | 7.22   | 7.3342 | -0.0458 |
| CEU | CLEC18A | 69640232 | 4.3125 | 6.1402 | -0.8601 |
| CEU | CLEC18A | 69645232 | 5.5584 | 7.1636 | -0.6571 |
| CEU | CLEC18A | 69650232 | 7.0959 | 7.6753 | -0.2227 |
| CEU | CLEC18A | 69655232 | 7.4162 | 7.6753 | -0.0996 |
| CEU | CLEC18A | 69660232 | 6.9922 | 6.4814 | 0.2289  |
| CEU | CLEC18A | 69665232 | 7.0903 | 6.3108 | 0.3579  |
| CEU | CLEC18A | 69670232 | 6.6895 | 6.6519 | 0.0165  |
| CEU | CLEC18A | 69675232 | 4.3364 | 4.7757 | -0.2584 |
| CEU | CLEC18A | 69680232 | 2.4803 | 4.2641 | -1.1579 |
| CEU | CLEC18A | 69685232 | 4.8487 | 6.4814 | -0.7318 |
| CEU | CLEC18A | 69690232 | 8.093  | 8.5281 | -0.1518 |
| CEU | CLEC18A | 69695232 | 8.0752 | 7.6753 | 0.1537  |
| CEU | CLEC18A | 69700232 | 8.7337 | 7.5047 | 0.4822  |
| CEU | CLEC18A | 69705232 | 7.0049 | 7.5047 | -0.1961 |
| CEU | CLEC18A | 69710232 | 4.8726 | 5.9697 | -0.5295 |
| CEU | CLEC18A | 69715232 | 7.546  | 7.3342 | 0.0849  |
| CEU | CLEC18A | 69720232 | 8.1221 | 8.0164 | 0.039   |
| CEU | CLEC18A | 69725232 | 3.988  | 5.1169 | -0.6249 |
| CEU | CLEC18A | 69730232 | 3.9965 | 4.6052 | -0.3696 |
| CEU | CLEC18A | 69735232 | 7.081  | 6.8225 | 0.1106  |
| CEU | CLEC18A | 69740232 | 6.6681 | 6.3108 | 0.164   |
| CEU | CLEC18A | 69745232 | 5.16   | 5.9697 | -0.3908 |
| CEU | CLEC18A | 69750232 | 5.4706 | 8.6987 | -1.1059 |
| CEU | CLEC18A | 69755232 | 6.0437 | 9.3809 | -1.0661 |
| CEU | CLEC18A | 69760232 | 6.0295 | 9.2104 | -1.0336 |
| CEU | CLEC18A | 69765232 | 6.5422 | 8.8692 | -0.783  |
| CEU | CLEC18A | 69770232 | 8.724  | 8.5281 | 0.0684  |
| CEU | CLEC18A | 69775232 | 7.2713 | 8.5281 | -0.4385 |
| CEU | CLEC18A | 69780232 | 5.6316 | 8.0164 | -0.8808 |
| CEU | CLEC18A | 69785232 | 7.0853 | 7.5047 | -0.1646 |
| CEU | CLEC18A | 69790232 | 5.0066 | 6.8225 | -0.777  |
| CEU | CLEC18A | 69795232 | 3.5929 | 6.4814 | -1.2947 |
| CEU | CLEC18A | 69800232 | 5.7755 | 6.8225 | -0.448  |
| CEU | CLEC18A | 69805232 | 5.568  | 6.4814 | -0.4094 |
| CEU | CLEC18A | 69810232 | 5.9879 | 6.9931 | -0.4206 |
| CEU | CLEC18A | 69815232 | 7.6122 | 8.5281 | -0.3196 |
| CEU | CLEC18A | 69820232 | 5.9394 | 7.3342 | -0.5589 |
| CEU | CLEC18A | 69825232 | 3.6151 | 5.7991 | -1.0817 |



## 2\_TajimasD\_data

|     |         |          |         |         |         |
|-----|---------|----------|---------|---------|---------|
| CEU | CLEC18A | 69830232 | 6.6013  | 6.3108  | 0.1334  |
| CEU | CLEC18A | 69835232 | 8.2618  | 6.1402  | 0.9984  |
| CEU | CLEC18A | 69840232 | 4.8978  | 5.1169  | -0.1213 |
| CEU | CLEC18A | 69845232 | 4.4721  | 5.458   | -0.5154 |
| CEU | CLEC18A | 69850232 | 5.0893  | 7.5047  | -0.9477 |
| CEU | CLEC18A | 69855232 | 7.129   | 8.5281  | -0.4882 |
| CEU | CLEC18A | 69860232 | 11.032  | 9.2104  | 0.5919  |
| CEU | CLEC18A | 69865232 | 9.133   | 8.3576  | 0.2756  |
| CEU | CLEC18A | 69870232 | 6.2946  | 7.5047  | -0.4748 |
| CEU | CLEC18A | 69875232 | 6.6228  | 8.0164  | -0.5147 |
| CEU | CLEC18A | 69880232 | 12.637  | 10.0632 | 0.7702  |
| CEU | CLEC18A | 69885232 | 15.3501 | 11.4277 | 1.0421  |
| CEU | CLEC18A | 69890232 | 9.1345  | 7.8459  | 0.4854  |
| CEU | CLEC18A | 69895232 | 11.6395 | 6.6519  | 2.1837  |
| CEU | CLEC18A | 69900232 | 15.71   | 9.2104  | 2.112   |
| CEU | CLEC18A | 69905232 | 12.2672 | 8.5281  | 1.3046  |
| CEU | CLEC18A | 69910232 | 8.4923  | 8.3576  | 0.0479  |
| CEU | CLEC18A | 69915232 | 6.6193  | 9.7221  | -0.9589 |
| CEU | CLEC18A | 69920232 | 4.8427  | 7.3342  | -0.9983 |
| CEU | CLEC18A | 69925232 | 5.1115  | 4.6052  | 0.3074  |
| CEU | CLEC18A | 69930232 | 5.5267  | 4.7757  | 0.4417  |
| CEU | CLEC18A | 69935232 | 3.88    | 5.7991  | -0.9505 |
| CEU | CLEC18A | 69940232 | 4.6368  | 6.9931  | -0.9859 |
| CEU | CLEC18A | 69945232 | 11.5424 | 8.8692  | 0.8995  |
| CEU | CLEC18A | 69950232 | 11.3791 | 8.3576  | 1.0741  |
| CEU | CLEC18A | 69955232 | 8.2651  | 7.8459  | 0.1579  |
| CEU | CLEC18A | 69960232 | 10.6799 | 8.0164  | 0.9838  |
| CEU | CLEC18A | 69965232 | 13.3927 | 8.6987  | 1.6081  |
| CEU | CLEC18A | 69970232 | 12.9882 | 8.6987  | 1.4696  |
| CEU | CLEC18A | 69975232 | 11.2381 | 8.0164  | 1.1899  |
| CEU | CLEC18A | 69980232 | 7.5737  | 5.7991  | 0.8789  |
| CEU | CLEC18A | 69985232 | 8.8644  | 6.3108  | 1.1724  |
| CEU | CLEC18A | 69990232 | 8.9116  | 5.2874  | 1.9487  |
| CEU | CLEC18A | 69995232 | 6.3968  | 4.2641  | 1.3844  |
| CEU | CLEC18A | 70000232 | 9.1894  | 6.6519  | 1.111   |
| CEU | CLEC18A | 70005232 | 10.6753 | 7.3342  | 1.3387  |
| CEU | CLEC18A | 70010232 | 15.384  | 11.5982 | 0.9919  |
| CEU | CLEC18A | 70015232 | 17.3568 | 12.9627 | 1.0366  |
| CEU | CLEC18A | 70020232 | 17.6479 | 11.2571 | 1.7221  |
| CEU | CLEC18A | 70025232 | 15.3515 | 10.0632 | 1.5826  |
| CEU | CLEC18A | 70030232 | 13.8143 | 8.5281  | 1.8444  |
| CEU | CLEC18A | 70035232 | 15.6745 | 8.187   | 2.7126  |
| CEU | CLEC18A | 70040232 | 11.8794 | 7.3342  | 1.8211  |
| CEU | CLEC18A | 70045232 | 11.0921 | 8.187   | 1.0525  |
| CEU | CLEC18A | 70050232 | 12.1097 | 8.0164  | 1.5119  |
| CEU | CLEC18A | 70055232 | 8.067   | 7.3342  | 0.2936  |
| CEU | CLEC18A | 70060232 | 9.1721  | 8.5281  | 0.2247  |
| CEU | CLEC18A | 70065232 | 9.4212  | 6.9931  | 1.016   |
| CEU | CLEC18A | 70070232 | 6.5939  | 5.2874  | 0.7025  |

## 2\_TajimasD\_data

|     |         |          |         |         |         |
|-----|---------|----------|---------|---------|---------|
| CEU | CLEC18A | 70075232 | 7.5242  | 5.6286  | 0.9642  |
| CEU | CLEC18A | 70080232 | 11.5267 | 7.1636  | 1.786   |
| CEU | CLEC18A | 70085232 | 13.5531 | 7.6753  | 2.2593  |
| CEU | CLEC18A | 70090232 | 11.6015 | 7.5047  | 1.6074  |
| CEU | CLEC18A | 70095232 | 9.5201  | 7.1636  | 0.9646  |
| CEU | CLEC18A | 70100232 | 10.2393 | 7.3342  | 1.164   |
| CEU | CLEC18A | 70105232 | 13.141  | 9.2104  | 1.2772  |
| CEU | CLEC18A | 70110232 | 13.8093 | 9.7221  | 1.2631  |
| CEU | CLEC18A | 70115232 | 14.3513 | 9.3809  | 1.5879  |
| CEU | CLEC18A | 70120232 | 10.4162 | 6.6519  | 1.6481  |
| CEU | CLEC18A | 70125232 | 4.5354  | 3.5818  | 0.7187  |
| CEU | CLEC18A | 70130232 | 5.8341  | 5.6286  | 0.1045  |
| CEU | CLEC18A | 70135232 | 9.31    | 7.6753  | 0.6283  |
| CEU | CLEC18A | 70140232 | 10.054  | 6.9931  | 1.2807  |
| CEU | CLEC18A | 70145232 | 11.2548 | 6.8225  | 1.8966  |
| CEU | CLEC18A | 70150232 | 13.572  | 7.5047  | 2.3805  |
| CEU | CLEC18A | 70155232 | 11.4638 | 8.6987  | 0.9473  |
| CEU | CLEC18A | 70160232 | 8.207   | 7.5047  | 0.2755  |
| CEU | CLEC18A | 70165232 | 8.3581  | 6.8225  | 0.6571  |
| CEU | CLEC18A | 70170232 | 5.1309  | 6.4814  | -0.6053 |
| CEU | CLEC18A | 70175232 | 3.1999  | 6.4814  | -1.4708 |
| CEU | CLEC18A | 70180232 | 6.3834  | 7.1636  | -0.3194 |
| CEU | CLEC18A | 70185232 | 11.23   | 8.187   | 1.1024  |
| CEU | CLEC18A | 70190232 | 12.7772 | 10.916  | 0.5162  |
| CEU | CLEC18A | 70195232 | 10.2224 | 11.5982 | -0.3605 |
| CEU | CLEC18A | 70200232 | 5.3929  | 7.3342  | -0.7778 |
| CEU | CLEC18A | 70205232 | 1.7613  | 3.4112  | -1.2959 |
| CEU | CLEC18A | 70210232 | 2.0167  | 2.729   | -0.6733 |
| CEU | CLEC18A | 70215232 | 1.1841  | 1.1939  | -0.0175 |
| CEU | CLEC18A | 70220232 | 0.6479  | 1.7056  | -1.4486 |
| CEU | CLEC18A | 70225232 | 2.1187  | 4.0935  | -1.3279 |
| CEU | CLEC18A | 70230232 | 4.04    | 5.7991  | -0.8713 |
| CEU | CLEC18A | 70235232 | 5.5209  | 9.5515  | -1.2663 |
| CEU | CLEC18A | 70240232 | 5.4552  | 9.3809  | -1.2541 |
| CEU | CLEC18A | 70245232 | 2.2791  | 5.1169  | -1.5708 |
| CEU | CLEC18A | 70250232 | 1.3542  | 3.9229  | -1.7916 |
| CEU | CLEC18A | 70255232 | 2.2816  | 2.8996  | -0.5558 |
| CEU | CLEC18A | 70260232 | 1.5819  | 3.0701  | -1.2766 |
| CEU | CLEC18A | 70265232 | 0.7951  | 3.7524  | -2.1425 |
| CEU | CLEC18A | 70270232 | 1.3785  | 4.2641  | -1.8732 |
| CEU | CLEC18A | 70275232 | 1.1431  | 3.5818  | -1.838  |
| CEU | CLEC18A | 70280232 | 1.8642  | 3.4112  | -1.215  |
| CEU | CLEC18A | 70285232 | 2.9138  | 4.9463  | -1.1591 |
| CEU | CLEC18A | 70290232 | 2.361   | 6.4814  | -1.8468 |
| CEU | CLEC18A | 70295232 | 2.638   | 6.1402  | -1.648  |
| CEU | CLEC18A | 70300232 | 3.2397  | 4.4346  | -0.7497 |
| CEU | CLEC18A | 70305232 | 3.1107  | 5.1169  | -1.1105 |
| CEU | CLEC18A | 70310232 | 1.477   | 4.2641  | -1.8092 |
| CEU | CLEC18A | 70315232 | 1.0664  | 4.0935  | -2.0355 |

## 2\_TajimasD\_data

|     |         |          |         |         |         |
|-----|---------|----------|---------|---------|---------|
| CEU | CLEC18A | 70320232 | 2.0557  | 4.6052  | -1.5479 |
| CEU | CLEC18A | 70325232 | 1.5104  | 3.0701  | -1.3379 |
| CEU | CLEC18A | 70330232 | 0.952   | 3.5818  | -1.9821 |
| CEU | CLEC18A | 70335232 | 1.5922  | 4.9463  | -1.9128 |
| CEU | CLEC18A | 70340232 | 2.8299  | 5.2874  | -1.3214 |
| CEU | CLEC18A | 70345232 | 2.1113  | 4.6052  | -1.5142 |
| CEU | CLEC18A | 70350232 | 2.3948  | 4.4346  | -1.2798 |
| CEU | CLEC18A | 70355232 | 2.2521  | 4.0935  | -1.2382 |
| CEU | CLEC18A | 70360232 | 1.8334  | 3.9229  | -1.4574 |
| CEU | CLEC18A | 70365232 | 2.416   | 4.7757  | -1.3878 |
| CEU | CLEC18A | 70370232 | 1.3504  | 4.4346  | -1.9351 |
| CEU | CLEC18A | 70375232 | 1.7559  | 4.6052  | -1.7299 |
| CEU | CLEC18A | 70380232 | 3.8503  | 5.2874  | -0.7727 |
| CEU | CLEC18A | 70385232 | 4.6654  | 5.1169  | -0.2499 |
| CEU | CLEC18A | 70390232 | 4.3342  | 4.6052  | -0.1645 |
| CEU | CLEC18A | 70395232 | 5.1315  | 4.4346  | 0.4373  |
| CEU | CLEC18A | 70400232 | 4.8743  | 4.9463  | -0.0411 |
| CEU | CLEC18A | 70405232 | 3.7089  | 5.6286  | -0.9765 |
| CEU | CLEC18A | 70410232 | 3.5663  | 7.3342  | -1.5097 |
| CEU | CLEC18A | 70415232 | 2.8229  | 6.8225  | -1.7114 |
| CEU | CLEC18A | 70420232 | 1.5389  | 4.2641  | -1.769  |
| CEU | CLEC18A | 70425232 | 3.0748  | 4.0935  | -0.685  |
| CEU | CLEC18A | 70430232 | 3.2484  | 4.4346  | -0.7443 |
| CEU | CLEC18A | 70435232 | 2.3894  | 3.7524  | -0.9875 |
| CEU | CLEC18A | 70440232 | 4.2902  | 4.4346  | -0.0906 |
| CEU | CLEC18A | 70445232 | 4.1569  | 5.458   | -0.6802 |
| CEU | CLEC18A | 70450232 | 2.3055  | 4.6052  | -1.3963 |
| CEU | CLEC18A | 70455232 | 1.6001  | 2.8996  | -1.1687 |
| CEU | CLEC18A | 70460232 | 1.6384  | 3.2407  | -1.3139 |
| CHB | CLEC18A | 69455232 | 6.1365  | 9.1484  | -0.982  |
| CHB | CLEC18A | 69460232 | 9.122   | 9.9955  | -0.2623 |
| CHB | CLEC18A | 69465232 | 7.2534  | 9.1484  | -0.6178 |
| CHB | CLEC18A | 69470232 | 6.1074  | 8.6402  | -0.8706 |
| CHB | CLEC18A | 69475232 | 9.2479  | 10.3343 | -0.3162 |
| CHB | CLEC18A | 69480232 | 8.248   | 9.3178  | -0.3429 |
| CHB | CLEC18A | 69485232 | 5.4306  | 7.9625  | -0.9382 |
| CHB | CLEC18A | 69490232 | 7.7986  | 9.9955  | -0.6597 |
| CHB | CLEC18A | 69495232 | 6.92    | 8.3013  | -0.4926 |
| CHB | CLEC18A | 69500232 | 6.9245  | 7.1154  | -0.0784 |
| CHB | CLEC18A | 69505232 | 8.008   | 10.6731 | -0.7527 |
| CHB | CLEC18A | 69510232 | 5.8572  | 11.012  | -1.4139 |
| CHB | CLEC18A | 69515232 | 6.3621  | 8.4708  | -0.7382 |
| CHB | CLEC18A | 69520232 | 8.1925  | 8.3013  | -0.0388 |
| CHB | CLEC18A | 69525232 | 6.7502  | 7.4543  | -0.2772 |
| CHB | CLEC18A | 69530232 | 7.3731  | 9.3178  | -0.6234 |
| CHB | CLEC18A | 69535232 | 10.7668 | 11.1814 | -0.1121 |
| CHB | CLEC18A | 69540232 | 9.5029  | 8.8096  | 0.2341  |
| CHB | CLEC18A | 69545232 | 7.7871  | 7.6237  | 0.063   |
| CHB | CLEC18A | 69550232 | 13.0166 | 10.5037 | 0.7204  |

## 2\_TajimasD\_data

|     |         |          |         |         |         |
|-----|---------|----------|---------|---------|---------|
| CHB | CLEC18A | 69555232 | 14.9949 | 10.8426 | 1.1556  |
| CHB | CLEC18A | 69560232 | 11.3373 | 9.3178  | 0.6473  |
| CHB | CLEC18A | 69565232 | 8.336   | 9.3178  | -0.3147 |
| CHB | CLEC18A | 69570232 | 4.3019  | 6.4378  | -0.9604 |
| CHB | CLEC18A | 69575232 | 4.242   | 6.6072  | -1.0388 |
| CHB | CLEC18A | 69580232 | 8.162   | 9.4872  | -0.4177 |
| CHB | CLEC18A | 69585232 | 7.6442  | 9.4872  | -0.581  |
| CHB | CLEC18A | 69590232 | 4.2054  | 8.8096  | -1.5545 |
| CHB | CLEC18A | 69595232 | 5.5761  | 8.4708  | -1.0134 |
| CHB | CLEC18A | 69600232 | 7.3958  | 7.2848  | 0.0446  |
| CHB | CLEC18A | 69605232 | 9.0495  | 7.1154  | 0.7943  |
| CHB | CLEC18A | 69610232 | 7.2362  | 6.6072  | 0.2763  |
| CHB | CLEC18A | 69615232 | 5.0855  | 6.6072  | -0.6683 |
| CHB | CLEC18A | 69620232 | 8.4274  | 7.7931  | 0.2397  |
| CHB | CLEC18A | 69625232 | 8.833   | 8.6402  | 0.0663  |
| CHB | CLEC18A | 69630232 | 9.3735  | 8.4708  | 0.316   |
| CHB | CLEC18A | 69635232 | 8.1744  | 7.2848  | 0.3576  |
| CHB | CLEC18A | 69640232 | 3.8085  | 7.7931  | -1.506  |
| CHB | CLEC18A | 69645232 | 5.605   | 9.1484  | -1.1553 |
| CHB | CLEC18A | 69650232 | 7.5553  | 8.979   | -0.4723 |
| CHB | CLEC18A | 69655232 | 7.0084  | 8.3013  | -0.4611 |
| CHB | CLEC18A | 69660232 | 6.7702  | 6.4378  | 0.1495  |
| CHB | CLEC18A | 69665232 | 7.538   | 7.2848  | 0.1018  |
| CHB | CLEC18A | 69670232 | 8.3646  | 8.1319  | 0.0846  |
| CHB | CLEC18A | 69675232 | 7.032   | 6.6072  | 0.1866  |
| CHB | CLEC18A | 69680232 | 4.0516  | 4.7436  | -0.4082 |
| CHB | CLEC18A | 69685232 | 5.1551  | 5.5907  | -0.2223 |
| CHB | CLEC18A | 69690232 | 9.3699  | 8.8096  | 0.1892  |
| CHB | CLEC18A | 69695232 | 9.9901  | 9.4872  | 0.1585  |
| CHB | CLEC18A | 69700232 | 9.8519  | 9.6567  | 0.0605  |
| CHB | CLEC18A | 69705232 | 9.0409  | 8.6402  | 0.1377  |
| CHB | CLEC18A | 69710232 | 6.4005  | 7.7931  | -0.5263 |
| CHB | CLEC18A | 69715232 | 8.9542  | 10.1649 | -0.3579 |
| CHB | CLEC18A | 69720232 | 11.2061 | 9.8261  | 0.421   |
| CHB | CLEC18A | 69725232 | 5.7636  | 5.5907  | 0.0882  |
| CHB | CLEC18A | 69730232 | 4.79    | 3.8965  | 0.6249  |
| CHB | CLEC18A | 69735232 | 8.2088  | 6.4378  | 0.7963  |
| CHB | CLEC18A | 69740232 | 7.9633  | 7.1154  | 0.3482  |
| CHB | CLEC18A | 69745232 | 6.1616  | 6.0989  | 0.0296  |
| CHB | CLEC18A | 69750232 | 8.2161  | 6.7766  | 0.6179  |
| CHB | CLEC18A | 69755232 | 9.2947  | 7.9625  | 0.4937  |
| CHB | CLEC18A | 69760232 | 8.7114  | 8.979   | -0.0888 |
| CHB | CLEC18A | 69765232 | 10.2225 | 9.4872  | 0.2318  |
| CHB | CLEC18A | 69770232 | 11.1159 | 8.979   | 0.7089  |
| CHB | CLEC18A | 69775232 | 7.6659  | 9.1484  | -0.4834 |
| CHB | CLEC18A | 69780232 | 7.3158  | 9.4872  | -0.6845 |
| CHB | CLEC18A | 69785232 | 9.9621  | 7.6237  | 0.9018  |
| CHB | CLEC18A | 69790232 | 5.9254  | 6.2684  | -0.158  |
| CHB | CLEC18A | 69795232 | 3.4161  | 5.4213  | -1.0515 |

## 2\_TajimasD\_data

|     |         |          |         |         |         |
|-----|---------|----------|---------|---------|---------|
| CHB | CLEC18A | 69800232 | 6.4085  | 6.6072  | -0.0873 |
| CHB | CLEC18A | 69805232 | 6.817   | 7.6237  | -0.3111 |
| CHB | CLEC18A | 69810232 | 9.1002  | 9.1484  | -0.0157 |
| CHB | CLEC18A | 69815232 | 12.3404 | 10.1649 | 0.6431  |
| CHB | CLEC18A | 69820232 | 9.787   | 8.4708  | 0.4608  |
| CHB | CLEC18A | 69825232 | 6.873   | 8.6402  | -0.6075 |
| CHB | CLEC18A | 69830232 | 8.6419  | 10.6731 | -0.5737 |
| CHB | CLEC18A | 69835232 | 9.6596  | 9.4872  | 0.0543  |
| CHB | CLEC18A | 69840232 | 5.9337  | 7.2848  | -0.5431 |
| CHB | CLEC18A | 69845232 | 5.0694  | 8.6402  | -1.2274 |
| CHB | CLEC18A | 69850232 | 4.7421  | 8.4708  | -1.3053 |
| CHB | CLEC18A | 69855232 | 6.1993  | 8.3013  | -0.7497 |
| CHB | CLEC18A | 69860232 | 12.4129 | 9.4872  | 0.9222  |
| CHB | CLEC18A | 69865232 | 13.5951 | 8.979   | 1.5313  |
| CHB | CLEC18A | 69870232 | 9.8886  | 7.2848  | 1.0466  |
| CHB | CLEC18A | 69875232 | 8.281   | 7.1154  | 0.4787  |
| CHB | CLEC18A | 69880232 | 14.7302 | 11.6896 | 0.7885  |
| CHB | CLEC18A | 69885232 | 19.4954 | 12.3673 | 1.753   |
| CHB | CLEC18A | 69890232 | 10.5087 | 8.979   | 0.5074  |
| CHB | CLEC18A | 69895232 | 5.7491  | 9.4872  | -1.1783 |
| CHB | CLEC18A | 69900232 | 6.8323  | 11.1814 | -1.176  |
| CHB | CLEC18A | 69905232 | 5.5288  | 10.3343 | -1.3988 |
| CHB | CLEC18A | 69910232 | 4.446   | 8.8096  | -1.4733 |
| CHB | CLEC18A | 69915232 | 2.9157  | 8.1319  | -1.896  |
| CHB | CLEC18A | 69920232 | 2.4133  | 6.0989  | -1.7398 |
| CHB | CLEC18A | 69925232 | 3.2972  | 4.913   | -0.9242 |
| CHB | CLEC18A | 69930232 | 3.3398  | 5.7601  | -1.2025 |
| CHB | CLEC18A | 69935232 | 3.6429  | 6.946   | -1.3865 |
| CHB | CLEC18A | 69940232 | 5.1913  | 8.979   | -1.2565 |
| CHB | CLEC18A | 69945232 | 5.9484  | 11.1814 | -1.415  |
| CHB | CLEC18A | 69950232 | 4.8155  | 8.979   | -1.3812 |
| CHB | CLEC18A | 69955232 | 5.4794  | 7.2848  | -0.7257 |
| CHB | CLEC18A | 69960232 | 6.7355  | 8.3013  | -0.5584 |
| CHB | CLEC18A | 69965232 | 5.9945  | 10.1649 | -1.2328 |
| CHB | CLEC18A | 69970232 | 5.3977  | 11.3508 | -1.5871 |
| CHB | CLEC18A | 69975232 | 6.1761  | 10.3343 | -1.2104 |
| CHB | CLEC18A | 69980232 | 4.6865  | 6.2684  | -0.7286 |
| CHB | CLEC18A | 69985232 | 5.1571  | 6.6072  | -0.6369 |
| CHB | CLEC18A | 69990232 | 5.1963  | 5.7601  | -0.2801 |
| CHB | CLEC18A | 69995232 | 4.2157  | 4.066   | 0.1009  |
| CHB | CLEC18A | 70000232 | 5.5616  | 6.7766  | -0.5216 |
| CHB | CLEC18A | 70005232 | 6.6541  | 7.4543  | -0.315  |
| CHB | CLEC18A | 70010232 | 10.3817 | 12.1979 | -0.4525 |
| CHB | CLEC18A | 70015232 | 9.4358  | 14.7391 | -1.1044 |
| CHB | CLEC18A | 70020232 | 8.6556  | 13.3838 | -1.0791 |
| CHB | CLEC18A | 70025232 | 8.3151  | 11.8591 | -0.9067 |
| CHB | CLEC18A | 70030232 | 5.6943  | 9.9955  | -1.2916 |
| CHB | CLEC18A | 70035232 | 6.968   | 11.1814 | -1.1393 |
| CHB | CLEC18A | 70040232 | 5.9585  | 10.8426 | -1.3593 |

## 2\_TajimasD\_data

|     |         |          |         |         |         |
|-----|---------|----------|---------|---------|---------|
| CHB | CLEC18A | 70045232 | 5.0636  | 10.8426 | -1.6083 |
| CHB | CLEC18A | 70050232 | 5.8597  | 12.1979 | -1.5791 |
| CHB | CLEC18A | 70055232 | 3.8254  | 9.8261  | -1.8308 |
| CHB | CLEC18A | 70060232 | 5.2096  | 9.1484  | -1.2842 |
| CHB | CLEC18A | 70065232 | 5.8568  | 8.8096  | -0.9969 |
| CHB | CLEC18A | 70070232 | 4.6469  | 7.7931  | -1.1891 |
| CHB | CLEC18A | 70075232 | 4.5229  | 8.1319  | -1.3118 |
| CHB | CLEC18A | 70080232 | 5.1359  | 10.1649 | -1.4866 |
| CHB | CLEC18A | 70085232 | 7.2515  | 11.6896 | -1.1509 |
| CHB | CLEC18A | 70090232 | 6.4108  | 9.4872  | -0.9697 |
| CHB | CLEC18A | 70095232 | 5.2332  | 8.6402  | -1.1711 |
| CHB | CLEC18A | 70100232 | 6.7516  | 10.8426 | -1.1385 |
| CHB | CLEC18A | 70105232 | 7.4361  | 10.8426 | -0.948  |
| CHB | CLEC18A | 70110232 | 6.7878  | 9.4872  | -0.8509 |
| CHB | CLEC18A | 70115232 | 8.8381  | 10.3343 | -0.4355 |
| CHB | CLEC18A | 70120232 | 8.206   | 9.6567  | -0.4498 |
| CHB | CLEC18A | 70125232 | 4.1116  | 6.0989  | -0.9381 |
| CHB | CLEC18A | 70130232 | 4.7885  | 6.0989  | -0.6186 |
| CHB | CLEC18A | 70135232 | 7.281   | 7.4543  | -0.0682 |
| CHB | CLEC18A | 70140232 | 7.3451  | 6.7766  | 0.244   |
| CHB | CLEC18A | 70145232 | 8.0213  | 8.4708  | -0.1574 |
| CHB | CLEC18A | 70150232 | 10.2637 | 11.8591 | -0.4082 |
| CHB | CLEC18A | 70155232 | 9.0497  | 10.6731 | -0.4585 |
| CHB | CLEC18A | 70160232 | 6.8148  | 8.6402  | -0.6275 |
| CHB | CLEC18A | 70165232 | 8.1022  | 10.8426 | -0.7627 |
| CHB | CLEC18A | 70170232 | 6.1656  | 9.1484  | -0.9725 |
| CHB | CLEC18A | 70175232 | 3.7333  | 7.7931  | -1.5344 |
| CHB | CLEC18A | 70180232 | 5.398   | 8.979   | -1.1879 |
| CHB | CLEC18A | 70185232 | 9.0526  | 9.8261  | -0.236  |
| CHB | CLEC18A | 70190232 | 10.7716 | 11.3508 | -0.1544 |
| CHB | CLEC18A | 70195232 | 8.8077  | 12.0285 | -0.8131 |
| CHB | CLEC18A | 70200232 | 4.5705  | 7.2848  | -1.0911 |
| CHB | CLEC18A | 70205232 | 1.8007  | 3.3883  | -1.2503 |
| CHB | CLEC18A | 70210232 | 1.6195  | 3.3883  | -1.393  |
| CHB | CLEC18A | 70215232 | 0.5271  | 1.5247  | -1.4821 |
| CHB | CLEC18A | 70220232 | 0.6914  | 1.6942  | -1.3762 |
| CHB | CLEC18A | 70225232 | 2.1626  | 5.0825  | -1.6211 |
| CHB | CLEC18A | 70230232 | 3.1517  | 7.9625  | -1.7827 |
| CHB | CLEC18A | 70235232 | 4.8972  | 10.6731 | -1.6313 |
| CHB | CLEC18A | 70240232 | 5.7293  | 12.3673 | -1.6324 |
| CHB | CLEC18A | 70245232 | 2.5974  | 8.4708  | -2.0561 |
| CHB | CLEC18A | 70250232 | 1.5313  | 5.5907  | -2.0712 |
| CHB | CLEC18A | 70255232 | 2.3507  | 5.5907  | -1.6531 |
| CHB | CLEC18A | 70260232 | 1.7129  | 5.7601  | -2.0107 |
| CHB | CLEC18A | 70265232 | 1.4184  | 6.4378  | -2.2569 |
| CHB | CLEC18A | 70270232 | 1.8865  | 7.1154  | -2.1474 |
| CHB | CLEC18A | 70275232 | 1.5148  | 7.2848  | -2.3193 |
| CHB | CLEC18A | 70280232 | 2.1626  | 7.9625  | -2.1493 |
| CHB | CLEC18A | 70285232 | 3.0579  | 7.9625  | -1.8175 |

## 2\_TajimasD\_data

|     |         |          |         |         |         |
|-----|---------|----------|---------|---------|---------|
| CHB | CLEC18A | 70290232 | 2.4209  | 7.1154  | -1.9279 |
| CHB | CLEC18A | 70295232 | 2.9465  | 7.6237  | -1.8037 |
| CHB | CLEC18A | 70300232 | 3.5121  | 8.4708  | -1.7359 |
| CHB | CLEC18A | 70305232 | 3.4198  | 10.8426 | -2.0658 |
| CHB | CLEC18A | 70310232 | 2.3676  | 9.9955  | -2.2905 |
| CHB | CLEC18A | 70315232 | 1.6973  | 7.9625  | -2.3217 |
| CHB | CLEC18A | 70320232 | 2.3853  | 7.4543  | -1.9953 |
| CHB | CLEC18A | 70325232 | 2.1782  | 7.4543  | -2.0768 |
| CHB | CLEC18A | 70330232 | 1.7752  | 7.1154  | -2.1931 |
| CHB | CLEC18A | 70335232 | 2.2907  | 6.2684  | -1.832  |
| CHB | CLEC18A | 70340232 | 2.5611  | 8.1319  | -2.0248 |
| CHB | CLEC18A | 70345232 | 1.7821  | 8.6402  | -2.3574 |
| CHB | CLEC18A | 70350232 | 3.1382  | 7.9625  | -1.7877 |
| CHB | CLEC18A | 70355232 | 3.3809  | 6.7766  | -1.4577 |
| CHB | CLEC18A | 70360232 | 3.1352  | 7.6237  | -1.7309 |
| CHB | CLEC18A | 70365232 | 3.1603  | 7.9625  | -1.7795 |
| CHB | CLEC18A | 70370232 | 1.491   | 6.7766  | -2.2689 |
| CHB | CLEC18A | 70375232 | 1.5245  | 6.0989  | -2.1593 |
| CHB | CLEC18A | 70380232 | 3.2913  | 7.6237  | -1.6707 |
| CHB | CLEC18A | 70385232 | 4.4724  | 8.6402  | -1.4326 |
| CHB | CLEC18A | 70390232 | 4.346   | 6.6072  | -0.9931 |
| CHB | CLEC18A | 70395232 | 4.3328  | 5.9295  | -0.773  |
| CHB | CLEC18A | 70400232 | 4.1807  | 7.1154  | -1.2052 |
| CHB | CLEC18A | 70405232 | 3.4514  | 7.6237  | -1.609  |
| CHB | CLEC18A | 70410232 | 3.2477  | 6.4378  | -1.4344 |
| CHB | CLEC18A | 70415232 | 2.6381  | 5.5907  | -1.5065 |
| CHB | CLEC18A | 70420232 | 1.2751  | 5.2519  | -2.1448 |
| CHB | CLEC18A | 70425232 | 2.2035  | 5.5907  | -1.7282 |
| CHB | CLEC18A | 70430232 | 2.2859  | 5.9295  | -1.7639 |
| CHB | CLEC18A | 70435232 | 2.5978  | 6.946   | -1.8252 |
| CHB | CLEC18A | 70440232 | 4.7061  | 8.4708  | -1.3179 |
| CHB | CLEC18A | 70445232 | 4.3543  | 10.8426 | -1.8057 |
| CHB | CLEC18A | 70450232 | 2.3533  | 10.5037 | -2.3367 |
| CHB | CLEC18A | 70455232 | 1.5646  | 7.9625  | -2.3709 |
| CHB | CLEC18A | 70460232 | 1.9532  | 6.7766  | -2.0705 |
| YRI | CLEC18A | 69455232 | 8.1326  | 11.7644 | -0.933  |
| YRI | CLEC18A | 69460232 | 11.1871 | 13.1089 | -0.4458 |
| YRI | CLEC18A | 69465232 | 11.2313 | 11.9324 | -0.1777 |
| YRI | CLEC18A | 69470232 | 11.416  | 11.9324 | -0.1309 |
| YRI | CLEC18A | 69475232 | 13.2491 | 14.2853 | -0.2215 |
| YRI | CLEC18A | 69480232 | 10.8607 | 12.7727 | -0.4545 |
| YRI | CLEC18A | 69485232 | 8.197   | 10.4199 | -0.6399 |
| YRI | CLEC18A | 69490232 | 8.7743  | 11.5963 | -0.7349 |
| YRI | CLEC18A | 69495232 | 6.7747  | 9.5795  | -0.8732 |
| YRI | CLEC18A | 69500232 | 7.5088  | 10.0837 | -0.7643 |
| YRI | CLEC18A | 69505232 | 9.6916  | 12.6047 | -0.7013 |
| YRI | CLEC18A | 69510232 | 9.5684  | 11.9324 | -0.5993 |
| YRI | CLEC18A | 69515232 | 9.893   | 12.7727 | -0.6846 |
| YRI | CLEC18A | 69520232 | 9.704   | 13.613  | -0.8749 |

## 2\_TajimasD\_data

|     |         |          |         |         |         |
|-----|---------|----------|---------|---------|---------|
| YRI | CLEC18A | 69525232 | 7.5032  | 11.9324 | -1.1228 |
| YRI | CLEC18A | 69530232 | 11.7573 | 15.1256 | -0.6821 |
| YRI | CLEC18A | 69535232 | 15.9047 | 16.302  | -0.0749 |
| YRI | CLEC18A | 69540232 | 13.209  | 14.9575 | -0.3578 |
| YRI | CLEC18A | 69545232 | 12.338  | 15.4617 | -0.6194 |
| YRI | CLEC18A | 69550232 | 16.1328 | 16.9743 | -0.1526 |
| YRI | CLEC18A | 69555232 | 14.625  | 15.2937 | -0.134  |
| YRI | CLEC18A | 69560232 | 11.1792 | 12.7727 | -0.3788 |
| YRI | CLEC18A | 69565232 | 10.9538 | 13.7811 | -0.6255 |
| YRI | CLEC18A | 69570232 | 7.1449  | 10.5879 | -0.9764 |
| YRI | CLEC18A | 69575232 | 7.8096  | 11.7644 | -1.016  |
| YRI | CLEC18A | 69580232 | 14.1974 | 16.134  | -0.3687 |
| YRI | CLEC18A | 69585232 | 13.588  | 15.1256 | -0.3114 |
| YRI | CLEC18A | 69590232 | 8.0716  | 13.613  | -1.2403 |
| YRI | CLEC18A | 69595232 | 8.0691  | 13.2769 | -1.1936 |
| YRI | CLEC18A | 69600232 | 8.2312  | 11.0921 | -0.7767 |
| YRI | CLEC18A | 69605232 | 9.6036  | 11.9324 | -0.5903 |
| YRI | CLEC18A | 69610232 | 9.1263  | 12.1005 | -0.7441 |
| YRI | CLEC18A | 69615232 | 6.2786  | 9.5795  | -1.0277 |
| YRI | CLEC18A | 69620232 | 9.0534  | 10.5879 | -0.4352 |
| YRI | CLEC18A | 69625232 | 10.8127 | 11.5963 | -0.2041 |
| YRI | CLEC18A | 69630232 | 10.0139 | 11.0921 | -0.2927 |
| YRI | CLEC18A | 69635232 | 9.5215  | 10.924  | -0.3863 |
| YRI | CLEC18A | 69640232 | 7.7221  | 9.7476  | -0.6205 |
| YRI | CLEC18A | 69645232 | 8.7696  | 9.4115  | -0.2032 |
| YRI | CLEC18A | 69650232 | 10.2522 | 10.924  | -0.185  |
| YRI | CLEC18A | 69655232 | 9.0139  | 11.4282 | -0.6374 |
| YRI | CLEC18A | 69660232 | 7.5419  | 8.7392  | -0.4059 |
| YRI | CLEC18A | 69665232 | 8.6894  | 9.9157  | -0.3697 |
| YRI | CLEC18A | 69670232 | 11.2445 | 12.9408 | -0.3983 |
| YRI | CLEC18A | 69675232 | 9.1415  | 10.0837 | -0.2797 |
| YRI | CLEC18A | 69680232 | 5.5341  | 8.067   | -0.9243 |
| YRI | CLEC18A | 69685232 | 7.7586  | 9.5795  | -0.5669 |
| YRI | CLEC18A | 69690232 | 11.2405 | 12.4366 | -0.2916 |
| YRI | CLEC18A | 69695232 | 10.7118 | 13.2769 | -0.5879 |
| YRI | CLEC18A | 69700232 | 10.3531 | 12.4366 | -0.508  |
| YRI | CLEC18A | 69705232 | 9.1929  | 10.5879 | -0.3956 |
| YRI | CLEC18A | 69710232 | 7.328   | 8.9073  | -0.526  |
| YRI | CLEC18A | 69715232 | 11.7442 | 10.756  | 0.2761  |
| YRI | CLEC18A | 69720232 | 13.3026 | 11.7644 | 0.3952  |
| YRI | CLEC18A | 69725232 | 6.2343  | 7.0586  | -0.3398 |
| YRI | CLEC18A | 69730232 | 4.3886  | 5.2099  | -0.4446 |
| YRI | CLEC18A | 69735232 | 8.1899  | 9.5795  | -0.4326 |
| YRI | CLEC18A | 69740232 | 8.4455  | 10.4199 | -0.5684 |
| YRI | CLEC18A | 69745232 | 7.4483  | 9.9157  | -0.7439 |
| YRI | CLEC18A | 69750232 | 7.9953  | 10.0837 | -0.6199 |
| YRI | CLEC18A | 69755232 | 8.9383  | 10.756  | -0.508  |
| YRI | CLEC18A | 69760232 | 10.3066 | 14.7895 | -0.9274 |
| YRI | CLEC18A | 69765232 | 9.534   | 14.7895 | -1.0872 |



## 2\_TajimasD\_data

|     |         |          |         |         |         |
|-----|---------|----------|---------|---------|---------|
| YRI | CLEC18A | 69770232 | 9.594   | 12.4366 | -0.693  |
| YRI | CLEC18A | 69775232 | 8.0943  | 12.2685 | -1.0308 |
| YRI | CLEC18A | 69780232 | 7.0887  | 12.7727 | -1.3513 |
| YRI | CLEC18A | 69785232 | 8.1107  | 11.4282 | -0.8758 |
| YRI | CLEC18A | 69790232 | 6.7459  | 10.2518 | -1.0247 |
| YRI | CLEC18A | 69795232 | 5.5038  | 11.5963 | -1.5865 |
| YRI | CLEC18A | 69800232 | 6.5383  | 11.2602 | -1.2641 |
| YRI | CLEC18A | 69805232 | 7.2715  | 8.7392  | -0.4975 |
| YRI | CLEC18A | 69810232 | 10.4022 | 11.5963 | -0.311  |
| YRI | CLEC18A | 69815232 | 13.0286 | 14.6214 | -0.3331 |
| YRI | CLEC18A | 69820232 | 9.7169  | 12.9408 | -0.757  |
| YRI | CLEC18A | 69825232 | 10.1205 | 14.9575 | -0.9899 |
| YRI | CLEC18A | 69830232 | 16.3495 | 16.4701 | -0.0225 |
| YRI | CLEC18A | 69835232 | 16.4447 | 13.9492 | 0.5458  |
| YRI | CLEC18A | 69840232 | 10.7798 | 11.4282 | -0.1712 |
| YRI | CLEC18A | 69845232 | 10.1007 | 13.2769 | -0.7279 |
| YRI | CLEC18A | 69850232 | 7.3589  | 12.4366 | -1.2379 |
| YRI | CLEC18A | 69855232 | 7.7134  | 11.5963 | -1.0111 |
| YRI | CLEC18A | 69860232 | 13.4766 | 14.7895 | -0.2716 |
| YRI | CLEC18A | 69865232 | 13.1294 | 14.9575 | -0.3741 |
| YRI | CLEC18A | 69870232 | 9.3239  | 11.4282 | -0.5555 |
| YRI | CLEC18A | 69875232 | 7.6931  | 10.756  | -0.8559 |
| YRI | CLEC18A | 69880232 | 15.3345 | 16.302  | -0.1824 |
| YRI | CLEC18A | 69885232 | 18.6351 | 16.4701 | 0.4042  |
| YRI | CLEC18A | 69890232 | 13.6989 | 13.9492 | -0.0547 |
| YRI | CLEC18A | 69895232 | 14.6944 | 14.9575 | -0.0538 |
| YRI | CLEC18A | 69900232 | 15.3713 | 17.9827 | -0.4481 |
| YRI | CLEC18A | 69905232 | 11.5966 | 17.6465 | -1.0572 |
| YRI | CLEC18A | 69910232 | 10.0278 | 15.9659 | -1.142  |
| YRI | CLEC18A | 69915232 | 11.2401 | 17.4785 | -1.1002 |
| YRI | CLEC18A | 69920232 | 10.4245 | 16.302  | -1.108  |
| YRI | CLEC18A | 69925232 | 13.0829 | 17.1423 | -0.7293 |
| YRI | CLEC18A | 69930232 | 15.3367 | 17.9827 | -0.4541 |
| YRI | CLEC18A | 69935232 | 10.5066 | 14.4534 | -0.8345 |
| YRI | CLEC18A | 69940232 | 8.935   | 14.2853 | -1.1439 |
| YRI | CLEC18A | 69945232 | 9.7633  | 15.4617 | -1.13   |
| YRI | CLEC18A | 69950232 | 9.2739  | 12.1005 | -0.7072 |
| YRI | CLEC18A | 69955232 | 10.6057 | 11.0921 | -0.1321 |
| YRI | CLEC18A | 69960232 | 9.2323  | 12.1005 | -0.7176 |
| YRI | CLEC18A | 69965232 | 9.0995  | 14.1172 | -1.085  |
| YRI | CLEC18A | 69970232 | 10.3429 | 14.6214 | -0.8948 |
| YRI | CLEC18A | 69975232 | 8.2174  | 11.7644 | -0.9112 |
| YRI | CLEC18A | 69980232 | 5.2296  | 7.5628  | -0.9032 |
| YRI | CLEC18A | 69985232 | 6.4166  | 9.0754  | -0.8703 |
| YRI | CLEC18A | 69990232 | 5.99    | 7.8989  | -0.7102 |
| YRI | CLEC18A | 69995232 | 4.8184  | 5.8822  | -0.5169 |
| YRI | CLEC18A | 70000232 | 7.34    | 10.4199 | -0.8866 |
| YRI | CLEC18A | 70005232 | 8.3423  | 11.7644 | -0.8792 |
| YRI | CLEC18A | 70010232 | 12.189  | 16.134  | -0.7511 |

## 2\_TajimasD\_data

|     |         |          |         |         |         |
|-----|---------|----------|---------|---------|---------|
| YRI | CLEC18A | 70015232 | 13.9732 | 17.6465 | -0.6419 |
| YRI | CLEC18A | 70020232 | 10.6038 | 15.7978 | -1.009  |
| YRI | CLEC18A | 70025232 | 7.067   | 15.1256 | -1.6318 |
| YRI | CLEC18A | 70030232 | 5.1901  | 13.613  | -1.8852 |
| YRI | CLEC18A | 70035232 | 8.8488  | 15.4617 | -1.3113 |
| YRI | CLEC18A | 70040232 | 9.3917  | 13.613  | -0.9448 |
| YRI | CLEC18A | 70045232 | 5.7757  | 10.924  | -1.4179 |
| YRI | CLEC18A | 70050232 | 8.2049  | 12.4366 | -1.0317 |
| YRI | CLEC18A | 70055232 | 8.8161  | 10.924  | -0.5806 |
| YRI | CLEC18A | 70060232 | 11.1435 | 10.2518 | 0.2606  |
| YRI | CLEC18A | 70065232 | 12.4254 | 10.756  | 0.4665  |
| YRI | CLEC18A | 70070232 | 8.4594  | 10.0837 | -0.4821 |
| YRI | CLEC18A | 70075232 | 8.675   | 9.5795  | -0.2816 |
| YRI | CLEC18A | 70080232 | 14.7657 | 11.9324 | 0.7182  |
| YRI | CLEC18A | 70085232 | 15.9984 | 12.6047 | 0.817   |
| YRI | CLEC18A | 70090232 | 10.2728 | 11.2602 | -0.2643 |
| YRI | CLEC18A | 70095232 | 9.2807  | 10.4199 | -0.3279 |
| YRI | CLEC18A | 70100232 | 11.411  | 12.6047 | -0.2874 |
| YRI | CLEC18A | 70105232 | 12.6002 | 15.2937 | -0.5397 |
| YRI | CLEC18A | 70110232 | 12.6385 | 13.7811 | -0.2528 |
| YRI | CLEC18A | 70115232 | 12.2478 | 13.7811 | -0.3392 |
| YRI | CLEC18A | 70120232 | 10.8812 | 13.2769 | -0.5491 |
| YRI | CLEC18A | 70125232 | 7.992   | 9.9157  | -0.58   |
| YRI | CLEC18A | 70130232 | 6.4153  | 8.5712  | -0.744  |
| YRI | CLEC18A | 70135232 | 7.0318  | 9.9157  | -0.8695 |
| YRI | CLEC18A | 70140232 | 9.0539  | 11.0921 | -0.5534 |
| YRI | CLEC18A | 70145232 | 12.2165 | 12.1005 | 0.029   |
| YRI | CLEC18A | 70150232 | 15.6096 | 14.2853 | 0.2831  |
| YRI | CLEC18A | 70155232 | 14.1009 | 16.9743 | -0.5212 |
| YRI | CLEC18A | 70160232 | 9.6722  | 13.9492 | -0.9354 |
| YRI | CLEC18A | 70165232 | 11.0366 | 11.9324 | -0.2271 |
| YRI | CLEC18A | 70170232 | 8.8706  | 12.9408 | -0.9557 |
| YRI | CLEC18A | 70175232 | 5.4889  | 10.5879 | -1.4461 |
| YRI | CLEC18A | 70180232 | 7.9976  | 10.5879 | -0.7346 |
| YRI | CLEC18A | 70185232 | 11.4218 | 14.4534 | -0.641  |
| YRI | CLEC18A | 70190232 | 12.3169 | 16.8062 | -0.822  |
| YRI | CLEC18A | 70195232 | 11.9067 | 16.6382 | -0.8747 |
| YRI | CLEC18A | 70200232 | 6.6724  | 11.7644 | -1.3082 |
| YRI | CLEC18A | 70205232 | 2.0288  | 6.0502  | -1.9054 |
| YRI | CLEC18A | 70210232 | 2.4973  | 4.5377  | -1.2468 |
| YRI | CLEC18A | 70215232 | 1.1516  | 2.3529  | -1.2716 |
| YRI | CLEC18A | 70220232 | 2.7808  | 2.689   | 0.0872  |
| YRI | CLEC18A | 70225232 | 7.3298  | 8.4031  | -0.3772 |
| YRI | CLEC18A | 70230232 | 10.9573 | 12.6047 | -0.3966 |
| YRI | CLEC18A | 70235232 | 13.6751 | 15.4617 | -0.3543 |
| YRI | CLEC18A | 70240232 | 15.3426 | 17.1423 | -0.3233 |
| YRI | CLEC18A | 70245232 | 9.7229  | 12.9408 | -0.7556 |
| YRI | CLEC18A | 70250232 | 6.0834  | 9.5795  | -1.0884 |
| YRI | CLEC18A | 70255232 | 8.9187  | 9.9157  | -0.3006 |

## 2\_TajimasD\_data

|     |         |           |         |         |         |
|-----|---------|-----------|---------|---------|---------|
| YRI | CLEC18A | 70260232  | 8.9756  | 9.5795  | -0.188  |
| YRI | CLEC18A | 70265232  | 8.8489  | 11.7644 | -0.749  |
| YRI | CLEC18A | 70270232  | 9.3423  | 13.445  | -0.9291 |
| YRI | CLEC18A | 70275232  | 10.1148 | 11.7644 | -0.4238 |
| YRI | CLEC18A | 70280232  | 11.3604 | 12.4366 | -0.2624 |
| YRI | CLEC18A | 70285232  | 10.3934 | 11.9324 | -0.3901 |
| YRI | CLEC18A | 70290232  | 7.6369  | 10.2518 | -0.7643 |
| YRI | CLEC18A | 70295232  | 8.5489  | 11.9324 | -0.8577 |
| YRI | CLEC18A | 70300232  | 11.7519 | 11.7644 | -0.0032 |
| YRI | CLEC18A | 70305232  | 13.1085 | 14.2853 | -0.2516 |
| YRI | CLEC18A | 70310232  | 9.5896  | 14.1172 | -0.979  |
| YRI | CLEC18A | 70315232  | 9.2498  | 10.5879 | -0.3795 |
| YRI | CLEC18A | 70320232  | 10.8885 | 10.756  | 0.037   |
| YRI | CLEC18A | 70325232  | 11.3864 | 10.4199 | 0.2782  |
| YRI | CLEC18A | 70330232  | 11.6873 | 10.2518 | 0.4196  |
| YRI | CLEC18A | 70335232  | 9.3994  | 9.9157  | -0.1557 |
| YRI | CLEC18A | 70340232  | 8.6005  | 10.2518 | -0.4826 |
| YRI | CLEC18A | 70345232  | 9.4817  | 11.4282 | -0.5139 |
| YRI | CLEC18A | 70350232  | 9.1044  | 11.4282 | -0.6135 |
| YRI | CLEC18A | 70355232  | 6.0991  | 8.5712  | -0.8531 |
| YRI | CLEC18A | 70360232  | 7.7671  | 9.9157  | -0.6478 |
| YRI | CLEC18A | 70365232  | 8.4454  | 12.4366 | -0.973  |
| YRI | CLEC18A | 70370232  | 7.3756  | 10.2518 | -0.8406 |
| YRI | CLEC18A | 70375232  | 6.8858  | 9.9157  | -0.9135 |
| YRI | CLEC18A | 70380232  | 6.5369  | 11.4282 | -1.2913 |
| YRI | CLEC18A | 70385232  | 6.4459  | 9.9157  | -1.0461 |
| YRI | CLEC18A | 70390232  | 7.5813  | 8.067   | -0.1772 |
| YRI | CLEC18A | 70395232  | 8.0287  | 9.5795  | -0.4828 |
| YRI | CLEC18A | 70400232  | 7.3271  | 10.756  | -0.9582 |
| YRI | CLEC18A | 70405232  | 8.8929  | 12.7727 | -0.9224 |
| YRI | CLEC18A | 70410232  | 7.1608  | 12.6047 | -1.3105 |
| YRI | CLEC18A | 70415232  | 5.8911  | 8.7392  | -0.9654 |
| YRI | CLEC18A | 70420232  | 5.5287  | 8.067   | -0.9262 |
| YRI | CLEC18A | 70425232  | 5.4668  | 7.8989  | -0.9048 |
| YRI | CLEC18A | 70430232  | 5.4878  | 7.0586  | -0.6476 |
| YRI | CLEC18A | 70435232  | 6.4743  | 10.0837 | -1.0713 |
| YRI | CLEC18A | 70440232  | 8.7255  | 12.4366 | -0.9048 |
| YRI | CLEC18A | 70445232  | 12.6803 | 12.9408 | -0.0612 |
| YRI | CLEC18A | 70450232  | 12.6295 | 11.7644 | 0.2222  |
| YRI | CLEC18A | 70455232  | 10.7134 | 9.0754  | 0.5362  |
| YRI | CLEC18A | 70460232  | 9.673   | 10.0837 | -0.1219 |
| CEU | CSH     | 123268708 | 7.3874  | 6.8225  | 0.2417  |
| CEU | CSH     | 123273708 | 6.6348  | 6.1402  | 0.2327  |
| CEU | CSH     | 123278708 | 2.4787  | 4.0935  | -1.0858 |
| CEU | CSH     | 123283708 | 2.2764  | 3.9229  | -1.1484 |
| CEU | CSH     | 123288708 | 5.0221  | 6.1402  | -0.5261 |
| CEU | CSH     | 123293708 | 6.6988  | 7.3342  | -0.2546 |
| CEU | CSH     | 123298708 | 6.1921  | 5.1169  | 0.5951  |
| CEU | CSH     | 123303708 | 8.2801  | 6.1402  | 1.007   |

## 2\_TajimasD\_data

|     |     |           |         |        |         |
|-----|-----|-----------|---------|--------|---------|
| CEU | CSH | 123308708 | 8.2863  | 7.3342 | 0.3815  |
| CEU | CSH | 123313708 | 8.2218  | 6.6519 | 0.6873  |
| CEU | CSH | 123318708 | 10.4933 | 7.8459 | 0.9973  |
| CEU | CSH | 123323708 | 10.6052 | 8.5281 | 0.7247  |
| CEU | CSH | 123328708 | 9.094   | 8.0164 | 0.398   |
| CEU | CSH | 123333708 | 7.7489  | 7.5047 | 0.0958  |
| CEU | CSH | 123338708 | 7.9505  | 6.9931 | 0.4006  |
| CEU | CSH | 123343708 | 7.94    | 6.4814 | 0.6538  |
| CEU | CSH | 123348708 | 7.1222  | 5.2874 | 0.9866  |
| CEU | CSH | 123353708 | 8.1872  | 6.1402 | 0.9633  |
| CEU | CSH | 123358708 | 9.4968  | 7.6753 | 0.7001  |
| CEU | CSH | 123363708 | 8.9431  | 7.3342 | 0.6446  |
| CEU | CSH | 123368708 | 8.3644  | 6.6519 | 0.7498  |
| CEU | CSH | 123373708 | 11.856  | 8.5281 | 1.1611  |
| CEU | CSH | 123378708 | 12.6419 | 9.8926 | 0.836   |
| CEU | CSH | 123383708 | 7.2447  | 7.5047 | -0.102  |
| CEU | CSH | 123388708 | 5.6382  | 6.1402 | -0.2362 |
| CEU | CSH | 123393708 | 7.6324  | 6.3108 | 0.6068  |
| CEU | CSH | 123398708 | 10.6582 | 7.6753 | 1.1465  |
| CEU | CSH | 123403708 | 10.6226 | 8.187  | 0.8824  |
| CEU | CSH | 123408708 | 6.805   | 7.3342 | -0.212  |
| CEU | CSH | 123413708 | 6.074   | 7.6753 | -0.6155 |
| CEU | CSH | 123418708 | 7.7809  | 7.3342 | 0.179   |
| CEU | CSH | 123423708 | 9.1909  | 8.187  | 0.3637  |
| CEU | CSH | 123428708 | 8.9025  | 8.6987 | 0.0698  |
| CEU | CSH | 123433708 | 5.5974  | 6.3108 | -0.3275 |
| CEU | CSH | 123438708 | 6.0493  | 5.7991 | 0.1239  |
| CEU | CSH | 123443708 | 8.8707  | 7.3342 | 0.6156  |
| CEU | CSH | 123448708 | 5.3931  | 5.7991 | -0.2011 |
| CEU | CSH | 123453708 | 3.6234  | 5.9697 | -1.1324 |
| CEU | CSH | 123458708 | 4.3206  | 6.8225 | -1.0706 |
| CEU | CSH | 123463708 | 4.5154  | 6.3108 | -0.8243 |
| CEU | CSH | 123468708 | 3.7662  | 5.6286 | -0.9473 |
| CEU | CSH | 123473708 | 4.0775  | 5.458  | -0.7217 |
| CEU | CSH | 123478708 | 5.6597  | 6.6519 | -0.4344 |
| CEU | CSH | 123483708 | 4.0899  | 5.7991 | -0.8466 |
| CEU | CSH | 123488708 | 3.7609  | 5.2874 | -0.8208 |
| CEU | CSH | 123493708 | 6.3791  | 6.6519 | -0.1194 |
| CEU | CSH | 123498708 | 4.7223  | 5.458  | -0.3846 |
| CEU | CSH | 123503708 | 2.6129  | 4.4346 | -1.143  |
| CEU | CSH | 123508708 | 4.9316  | 6.8225 | -0.8091 |
| CEU | CSH | 123513708 | 5.549   | 6.8225 | -0.5449 |
| CEU | CSH | 123518708 | 3.952   | 5.2874 | -0.7181 |
| CEU | CSH | 123523708 | 4.174   | 5.7991 | -0.8049 |
| CEU | CSH | 123528708 | 6.6193  | 7.1636 | -0.2228 |
| CEU | CSH | 123533708 | 8.4886  | 9.0398 | -0.1822 |
| CEU | CSH | 123538708 | 9.4065  | 9.8926 | -0.1478 |
| CEU | CSH | 123543708 | 7.3325  | 7.3342 | -0.0007 |
| CEU | CSH | 123548708 | 5.5106  | 5.1169 | 0.2179  |

## 2\_TajimasD\_data

|     |     |           |         |         |         |
|-----|-----|-----------|---------|---------|---------|
| CEU | CSH | 123553708 | 5.0973  | 4.9463  | 0.0861  |
| CEU | CSH | 123558708 | 2.5925  | 3.5818  | -0.7456 |
| CEU | CSH | 123563708 | 1.5793  | 2.8996  | -1.1874 |
| CEU | CSH | 123568708 | 3.174   | 4.0935  | -0.6183 |
| CEU | CSH | 123573708 | 7.7572  | 8.0164  | -0.0957 |
| CEU | CSH | 123578708 | 7.8957  | 8.8692  | -0.3276 |
| CEU | CSH | 123583708 | 6.1435  | 5.7991  | 0.1706  |
| CEU | CSH | 123588708 | 7.0625  | 5.6286  | 0.7294  |
| CEU | CSH | 123593708 | 5.122   | 5.6286  | -0.2577 |
| CEU | CSH | 123598708 | 6.5099  | 5.9697  | 0.2607  |
| CEU | CSH | 123603708 | 11.9813 | 9.7221  | 0.6982  |
| CEU | CSH | 123608708 | 12.5774 | 10.916  | 0.4608  |
| CEU | CSH | 123613708 | 7.4298  | 8.0164  | -0.2167 |
| CEU | CSH | 123618708 | 4.3873  | 6.1402  | -0.8249 |
| CEU | CSH | 123623708 | 5.4282  | 6.4814  | -0.4721 |
| CEU | CSH | 123628708 | 4.6376  | 6.9931  | -0.9856 |
| CEU | CSH | 123633708 | 3.3342  | 5.458   | -1.1103 |
| CEU | CSH | 123638708 | 4.6112  | 5.9697  | -0.6556 |
| CEU | CSH | 123643708 | 4.9594  | 6.9931  | -0.8509 |
| CEU | CSH | 123648708 | 4.2109  | 5.9697  | -0.8488 |
| CEU | CSH | 123653708 | 3.4378  | 4.6052  | -0.7088 |
| CEU | CSH | 123658708 | 6.491   | 6.1402  | 0.1651  |
| CEU | CSH | 123663708 | 7.9295  | 6.4814  | 0.6491  |
| CEU | CSH | 123668708 | 5.3423  | 4.7757  | 0.3332  |
| CEU | CSH | 123673708 | 8.3214  | 7.6753  | 0.2483  |
| CEU | CSH | 123678708 | 9.8517  | 8.6987  | 0.395   |
| CEU | CSH | 123683708 | 9.1486  | 6.8225  | 0.9953  |
| CEU | CSH | 123688708 | 10.5326 | 7.8459  | 1.0121  |
| CEU | CSH | 123693708 | 10.2838 | 8.8692  | 0.476   |
| CEU | CSH | 123698708 | 12.6677 | 9.0398  | 1.1995  |
| CEU | CSH | 123703708 | 14.1643 | 10.5749 | 1.0256  |
| CEU | CSH | 123708708 | 10.1839 | 9.3809  | 0.2565  |
| CEU | CSH | 123713708 | 9.3537  | 7.3342  | 0.8092  |
| CEU | CSH | 123718708 | 7.2086  | 8.6987  | -0.5105 |
| CEU | CSH | 123723708 | 1.8955  | 7.1636  | -2.1565 |
| CEU | CSH | 123728708 | 2.2148  | 5.458   | -1.6955 |
| CEU | CSH | 123733708 | 3.3593  | 6.6519  | -1.4416 |
| CEU | CSH | 123738708 | 4.953   | 8.5281  | -1.2474 |
| CEU | CSH | 123743708 | 6.046   | 10.4043 | -1.2643 |
| CEU | CSH | 123748708 | 3.7392  | 7.1636  | -1.4018 |
| CEU | CSH | 123753708 | 4.5479  | 5.458   | -0.4758 |
| CEU | CSH | 123758708 | 6.7541  | 6.6519  | 0.0447  |
| CEU | CSH | 123763708 | 8.6236  | 6.6519  | 0.8632  |
| CEU | CSH | 123768708 | 20.2797 | 9.8926  | 3.1584  |
| CEU | CSH | 123773708 | 38.5914 | 15.3506 | 4.6694  |
| CEU | CSH | 123778708 | 42.9278 | 17.9091 | 4.3374  |
| CEU | CSH | 123783708 | 37.1193 | 17.7385 | 3.3909  |
| CEU | CSH | 123788708 | 34.0988 | 16.5446 | 3.2834  |
| CEU | CSH | 123793708 | 21.5995 | 11.0866 | 2.8737  |

## 2\_TajimasD\_data

|     |     |           |         |         |         |
|-----|-----|-----------|---------|---------|---------|
| CEU | CSH | 123798708 | 10.8691 | 7.6753  | 1.2276  |
| CEU | CSH | 123803708 | 9.6964  | 8.3576  | 0.4759  |
| CEU | CSH | 123808708 | 8.1202  | 8.0164  | 0.0383  |
| CEU | CSH | 123813708 | 9.3612  | 7.5047  | 0.7284  |
| CEU | CSH | 123818708 | 10.4702 | 7.3342  | 1.2565  |
| CEU | CSH | 123823708 | 8.8955  | 7.5047  | 0.5457  |
| CEU | CSH | 123828708 | 8.1062  | 7.1636  | 0.3859  |
| CEU | CSH | 123833708 | 8.6803  | 6.6519  | 0.8881  |
| CEU | CSH | 123838708 | 11.6797 | 8.187   | 1.2653  |
| CEU | CSH | 123843708 | 13.2542 | 9.2104  | 1.314   |
| CEU | CSH | 123848708 | 13.1218 | 10.2337 | 0.8509  |
| CEU | CSH | 123853708 | 14.5071 | 11.0866 | 0.935   |
| CEU | CSH | 123858708 | 13.0006 | 10.5749 | 0.6931  |
| CEU | CSH | 123863708 | 12.1497 | 10.7454 | 0.3953  |
| CEU | CSH | 123868708 | 11.4929 | 11.4277 | 0.0173  |
| CEU | CSH | 123873708 | 10.4378 | 12.7922 | -0.5624 |
| CEU | CSH | 123878708 | 13.2752 | 13.8156 | -0.12   |
| CEU | CSH | 123883708 | 11.3354 | 11.2571 | 0.0211  |
| CEU | CSH | 123888708 | 7.8011  | 8.3576  | -0.1978 |
| CEU | CSH | 123893708 | 10.1313 | 8.3576  | 0.6305  |
| CEU | CSH | 123898708 | 9.9705  | 8.3576  | 0.5733  |
| CEU | CSH | 123903708 | 12.8423 | 11.0866 | 0.4799  |
| CEU | CSH | 123908708 | 13.4758 | 11.2571 | 0.5979  |
| CEU | CSH | 123913708 | 10.6242 | 9.0398  | 0.5238  |
| CEU | CSH | 123918708 | 11.4082 | 10.0632 | 0.4025  |
| CEU | CSH | 123923708 | 11.6848 | 10.0632 | 0.4853  |
| CEU | CSH | 123928708 | 12.6749 | 10.4043 | 0.6587  |
| CEU | CSH | 123933708 | 11.4601 | 8.6987  | 0.946   |
| CEU | CSH | 123938708 | 10.0045 | 8.3576  | 0.5854  |
| CEU | CSH | 123943708 | 9.5867  | 9.3809  | 0.0657  |
| CEU | CSH | 123948708 | 8.0106  | 6.9931  | 0.4257  |
| CEU | CSH | 123953708 | 8.7315  | 8.8692  | -0.0463 |
| CEU | CSH | 123958708 | 8.2055  | 9.5515  | -0.4229 |
| CEU | CSH | 123963708 | 9.6786  | 8.187   | 0.5404  |
| CEU | CSH | 123968708 | 15.9163 | 11.0866 | 1.3202  |
| CEU | CSH | 123973708 | 19.5086 | 14.1567 | 1.1614  |
| CEU | CSH | 123978708 | 19.6178 | 15.1801 | 0.9011  |
| CEU | CSH | 123983708 | 16.1754 | 16.0329 | 0.0275  |
| CEU | CSH | 123988708 | 12.1612 | 12.9627 | -0.1891 |
| CEU | CSH | 123993708 | 12.3633 | 10.7454 | 0.4554  |
| CEU | CSH | 123998708 | 21.5155 | 16.2034 | 1.0136  |
| CEU | CSH | 124003708 | 22.128  | 16.2034 | 1.1304  |
| CEU | CSH | 124008708 | 13.4273 | 11.2571 | 0.5848  |
| CEU | CSH | 124013708 | 9.7411  | 9.3809  | 0.1151  |
| CEU | CSH | 124018708 | 7.6621  | 8.6987  | -0.3551 |
| CEU | CSH | 124023708 | 9.4367  | 9.3809  | 0.0178  |
| CEU | CSH | 124028708 | 15.6142 | 11.9394 | 0.9369  |
| CEU | CSH | 124033708 | 19.6574 | 15.3506 | 0.8653  |
| CEU | CSH | 124038708 | 13.7759 | 13.4744 | 0.0686  |

## 2\_TajimasD\_data

|     |     |           |         |         |         |
|-----|-----|-----------|---------|---------|---------|
| CEU | CSH | 124043708 | 6.5564  | 10.0632 | -1.0495 |
| CEU | CSH | 124048708 | 6.8837  | 10.5749 | -1.0546 |
| CEU | CSH | 124053708 | 9.309   | 10.916  | -0.4457 |
| CEU | CSH | 124058708 | 12.2641 | 13.4744 | -0.2752 |
| CEU | CSH | 124063708 | 11.7741 | 13.4744 | -0.3867 |
| CEU | CSH | 124068708 | 7.6461  | 9.5515  | -0.5986 |
| CEU | CSH | 124073708 | 7.5828  | 9.7221  | -0.6611 |
| CEU | CSH | 124078708 | 6.0604  | 9.0398  | -0.9851 |
| CEU | CSH | 124083708 | 4.502   | 6.8225  | -0.9929 |
| CEU | CSH | 124088708 | 4.1086  | 5.7991  | -0.8373 |
| CEU | CSH | 124093708 | 4.4354  | 5.7991  | -0.6754 |
| CEU | CSH | 124098708 | 8.4974  | 8.8692  | -0.1251 |
| CEU | CSH | 124103708 | 10.6619 | 10.5749 | 0.0249  |
| CEU | CSH | 124108708 | 13.24   | 11.5982 | 0.4302  |
| CEU | CSH | 124113708 | 11.4952 | 10.916  | 0.1606  |
| CEU | CSH | 124118708 | 6.5704  | 7.8459  | -0.4805 |
| CEU | CSH | 124123708 | 9.0897  | 8.6987  | 0.134   |
| CEU | CSH | 124128708 | 13.8355 | 10.5749 | 0.9316  |
| CEU | CSH | 124133708 | 19.5294 | 12.1099 | 1.8665  |
| CEU | CSH | 124138708 | 13.8724 | 11.0866 | 0.7615  |
| CEU | CSH | 124143708 | 5.2641  | 8.6987  | -1.1767 |
| CEU | CSH | 124148708 | 13.4389 | 11.4277 | 0.5343  |
| CEU | CSH | 124153708 | 17.1117 | 12.2805 | 1.1995  |
| CEU | CSH | 124158708 | 12.2771 | 9.5515  | 0.8563  |
| CEU | CSH | 124163708 | 13.0499 | 9.0398  | 1.3258  |
| CEU | CSH | 124168708 | 14.778  | 9.8926  | 1.4855  |
| CEU | CSH | 124173708 | 16.1552 | 11.5982 | 1.194   |
| CEU | CSH | 124178708 | 14.1181 | 10.4043 | 1.0774  |
| CEU | CSH | 124183708 | 11.1325 | 8.5281  | 0.9087  |
| CEU | CSH | 124188708 | 10.826  | 8.0164  | 1.0377  |
| CEU | CSH | 124193708 | 10.6644 | 7.3342  | 1.3343  |
| CEU | CSH | 124198708 | 10.1486 | 6.4814  | 1.6437  |
| CEU | CSH | 124203708 | 11.5852 | 8.3576  | 1.1473  |
| CEU | CSH | 124208708 | 12.824  | 9.5515  | 1.0281  |
| CEU | CSH | 124213708 | 11.5312 | 7.1636  | 1.7879  |
| CEU | CSH | 124218708 | 10.8491 | 6.8225  | 1.723   |
| CEU | CSH | 124223708 | 9.717   | 8.0164  | 0.6281  |
| CEU | CSH | 124228708 | 10.1247 | 9.0398  | 0.3587  |
| CEU | CSH | 124233708 | 10.819  | 8.5281  | 0.7993  |
| CEU | CSH | 124238708 | 7.0765  | 6.6519  | 0.1859  |
| CEU | CSH | 124243708 | 5.8013  | 7.1636  | -0.5577 |
| CEU | CSH | 124248708 | 8.8953  | 9.0398  | -0.0478 |
| CEU | CSH | 124253708 | 10.1855 | 8.187   | 0.724   |
| CEU | CSH | 124258708 | 11.1577 | 7.5047  | 1.4333  |
| CEU | CSH | 124263708 | 10.8889 | 8.0164  | 1.061   |
| CEU | CSH | 124268708 | 17.3117 | 11.4277 | 1.5633  |
| CEU | CSH | 124273708 | 15.7489 | 10.2337 | 1.6248  |
| CEU | CSH | 124278708 | 6.1563  | 6.3108  | -0.0709 |
| CEU | CSH | 124283708 | 6.9433  | 6.6519  | 0.1276  |

## 2\_TajimasD\_data

|     |     |           |         |         |         |
|-----|-----|-----------|---------|---------|---------|
| CEU | CSH | 124288708 | 7.569   | 6.4814  | 0.4875  |
| CEU | CSH | 124293708 | 6.0231  | 6.9931  | -0.4059 |
| CEU | CSH | 124298708 | 12.1453 | 12.9627 | -0.1928 |
| CEU | CSH | 124303708 | 17.1095 | 15.0095 | 0.4311  |
| CEU | CSH | 124308708 | 11.1985 | 8.8692  | 0.7838  |
| CEU | CSH | 124313708 | 8.027   | 8.0164  | 0.0039  |
| CEU | CSH | 124318708 | 8.2062  | 8.187   | 0.007   |
| CEU | CSH | 124323708 | 8.9073  | 7.1636  | 0.7138  |
| CEU | CSH | 124328708 | 9.5259  | 7.3342  | 0.8781  |
| CEU | CSH | 124333708 | 8.7893  | 6.9931  | 0.7516  |
| CEU | CSH | 124338708 | 6.1697  | 6.4814  | -0.1397 |
| CEU | CSH | 124343708 | 8.9812  | 8.8692  | 0.0377  |
| CEU | CSH | 124348708 | 11.4203 | 9.7221  | 0.5248  |
| CEU | CSH | 124353708 | 9.3243  | 8.187   | 0.412   |
| CEU | CSH | 124358708 | 7.9231  | 7.1636  | 0.3109  |
| CEU | CSH | 124363708 | 10.9004 | 8.3576  | 0.9039  |
| CEU | CSH | 124368708 | 19.9885 | 14.3272 | 1.2147  |
| CHB | CSH | 123268708 | 6.8888  | 6.6072  | 0.1237  |
| CHB | CSH | 123273708 | 6.2867  | 8.1319  | -0.6707 |
| CHB | CSH | 123278708 | 1.9772  | 5.4213  | -1.806  |
| CHB | CSH | 123283708 | 1.8045  | 2.7106  | -0.8586 |
| CHB | CSH | 123288708 | 4.6596  | 4.5742  | 0.052   |
| CHB | CSH | 123293708 | 5.6994  | 5.9295  | -0.1114 |
| CHB | CSH | 123298708 | 5.505   | 5.4213  | 0.0439  |
| CHB | CSH | 123303708 | 7.8862  | 5.7601  | 1.0563  |
| CHB | CSH | 123308708 | 7.2501  | 6.2684  | 0.4521  |
| CHB | CSH | 123313708 | 7.265   | 7.6237  | -0.1383 |
| CHB | CSH | 123318708 | 9.4489  | 8.6402  | 0.278   |
| CHB | CSH | 123323708 | 9.395   | 7.6237  | 0.6831  |
| CHB | CSH | 123328708 | 8.1361  | 6.946   | 0.4996  |
| CHB | CSH | 123333708 | 7.2747  | 6.946   | 0.138   |
| CHB | CSH | 123338708 | 7.7384  | 7.4543  | 0.1118  |
| CHB | CSH | 123343708 | 7.6943  | 7.4543  | 0.0945  |
| CHB | CSH | 123348708 | 6.8233  | 7.2848  | -0.1855 |
| CHB | CSH | 123353708 | 6.9315  | 6.2684  | 0.3054  |
| CHB | CSH | 123358708 | 8.3746  | 6.946   | 0.5997  |
| CHB | CSH | 123363708 | 8.3328  | 7.1154  | 0.4999  |
| CHB | CSH | 123368708 | 7.7698  | 6.4378  | 0.5989  |
| CHB | CSH | 123373708 | 10.997  | 8.6402  | 0.8101  |
| CHB | CSH | 123378708 | 11.0412 | 8.8096  | 0.7534  |
| CHB | CSH | 123383708 | 5.83    | 6.6072  | -0.3414 |
| CHB | CSH | 123388708 | 5.0366  | 5.9295  | -0.4323 |
| CHB | CSH | 123393708 | 7.0114  | 7.6237  | -0.2361 |
| CHB | CSH | 123398708 | 9.285   | 11.1814 | -0.5128 |
| CHB | CSH | 123403708 | 10.1055 | 11.3508 | -0.332  |
| CHB | CSH | 123408708 | 7.1974  | 8.3013  | -0.3937 |
| CHB | CSH | 123413708 | 6.0293  | 7.6237  | -0.6148 |
| CHB | CSH | 123418708 | 7.5174  | 6.946   | 0.2399  |
| CHB | CSH | 123423708 | 8.506   | 7.4543  | 0.414   |



## 2\_TajimasD\_data

|     |     |           |        |         |         |
|-----|-----|-----------|--------|---------|---------|
| CHB | CSH | 123428708 | 8.8317 | 9.8261  | -0.3034 |
| CHB | CSH | 123433708 | 5.8487 | 7.6237  | -0.6845 |
| CHB | CSH | 123438708 | 5.2248 | 6.2684  | -0.4806 |
| CHB | CSH | 123443708 | 8.2269 | 8.6402  | -0.1421 |
| CHB | CSH | 123448708 | 5.3699 | 6.2684  | -0.4138 |
| CHB | CSH | 123453708 | 3.072  | 4.2354  | -0.7574 |
| CHB | CSH | 123458708 | 4.1942 | 4.7436  | -0.3241 |
| CHB | CSH | 123463708 | 4.6269 | 5.5907  | -0.4918 |
| CHB | CSH | 123468708 | 3.6592 | 5.2519  | -0.859  |
| CHB | CSH | 123473708 | 4.3417 | 5.0825  | -0.4113 |
| CHB | CSH | 123478708 | 6.2648 | 7.9625  | -0.6291 |
| CHB | CSH | 123483708 | 4.446  | 7.4543  | -1.1841 |
| CHB | CSH | 123488708 | 3.6115 | 4.7436  | -0.6678 |
| CHB | CSH | 123493708 | 5.8789 | 6.7766  | -0.3854 |
| CHB | CSH | 123498708 | 4.1519 | 6.2684  | -0.9748 |
| CHB | CSH | 123503708 | 1.8934 | 4.4048  | -1.5803 |
| CHB | CSH | 123508708 | 1.917  | 5.0825  | -1.7574 |
| CHB | CSH | 123513708 | 2.3815 | 4.7436  | -1.3933 |
| CHB | CSH | 123518708 | 1.9669 | 3.7271  | -1.2787 |
| CHB | CSH | 123523708 | 1.6196 | 3.7271  | -1.5311 |
| CHB | CSH | 123528708 | 2.0891 | 4.5742  | -1.5132 |
| CHB | CSH | 123533708 | 2.4076 | 5.5907  | -1.6241 |
| CHB | CSH | 123538708 | 2.6313 | 5.2519  | -1.4134 |
| CHB | CSH | 123543708 | 1.7668 | 3.3883  | -1.277  |
| CHB | CSH | 123548708 | 1.2935 | 2.7106  | -1.3428 |
| CHB | CSH | 123553708 | 1.9937 | 2.8801  | -0.7992 |
| CHB | CSH | 123558708 | 1.9899 | 4.4048  | -1.5196 |
| CHB | CSH | 123563708 | 1.0613 | 4.4048  | -2.1039 |
| CHB | CSH | 123568708 | 2.2857 | 4.4048  | -1.3334 |
| CHB | CSH | 123573708 | 5.8024 | 8.1319  | -0.8467 |
| CHB | CSH | 123578708 | 6.1966 | 7.6237  | -0.5503 |
| CHB | CSH | 123583708 | 5.2776 | 4.5742  | 0.4283  |
| CHB | CSH | 123588708 | 5.5818 | 5.7601  | -0.0886 |
| CHB | CSH | 123593708 | 4.5471 | 6.2684  | -0.7928 |
| CHB | CSH | 123598708 | 4.558  | 7.6237  | -1.1822 |
| CHB | CSH | 123603708 | 5.5561 | 11.5202 | -1.5681 |
| CHB | CSH | 123608708 | 4.2979 | 11.012  | -1.8416 |
| CHB | CSH | 123613708 | 2.2416 | 7.2848  | -2.0272 |
| CHB | CSH | 123618708 | 2.4485 | 6.946   | -1.8879 |
| CHB | CSH | 123623708 | 3.3189 | 7.7931  | -1.691  |
| CHB | CSH | 123628708 | 2.304  | 6.2684  | -1.8259 |
| CHB | CSH | 123633708 | 1.9041 | 5.9295  | -1.9488 |
| CHB | CSH | 123638708 | 2.9029 | 7.6237  | -1.8205 |
| CHB | CSH | 123643708 | 2.1847 | 7.9625  | -2.1411 |
| CHB | CSH | 123648708 | 1.605  | 6.6072  | -2.197  |
| CHB | CSH | 123653708 | 1.5028 | 4.4048  | -1.8261 |
| CHB | CSH | 123658708 | 2.1877 | 6.2684  | -1.8794 |
| CHB | CSH | 123663708 | 2.9063 | 7.4543  | -1.7902 |
| CHB | CSH | 123668708 | 2.0406 | 5.2519  | -1.732  |

## 2\_TajimasD\_data

|     |     |           |         |         |         |
|-----|-----|-----------|---------|---------|---------|
| CHB | CSH | 123673708 | 2.3115  | 6.6072  | -1.8867 |
| CHB | CSH | 123678708 | 4.2067  | 8.6402  | -1.524  |
| CHB | CSH | 123683708 | 6.846   | 7.4543  | -0.2394 |
| CHB | CSH | 123688708 | 8.6504  | 7.7931  | 0.324   |
| CHB | CSH | 123693708 | 8.034   | 8.6402  | -0.2084 |
| CHB | CSH | 123698708 | 9.0788  | 8.8096  | 0.0909  |
| CHB | CSH | 123703708 | 10.1114 | 9.6567  | 0.141   |
| CHB | CSH | 123708708 | 6.9429  | 8.3013  | -0.4845 |
| CHB | CSH | 123713708 | 7.1723  | 7.4543  | -0.111  |
| CHB | CSH | 123718708 | 6.0251  | 9.9955  | -1.1922 |
| CHB | CSH | 123723708 | 1.3815  | 8.4708  | -2.4818 |
| CHB | CSH | 123728708 | 1.8153  | 5.4213  | -1.8909 |
| CHB | CSH | 123733708 | 2.7453  | 6.6072  | -1.6962 |
| CHB | CSH | 123738708 | 3.7017  | 7.7931  | -1.5463 |
| CHB | CSH | 123743708 | 4.5342  | 9.1484  | -1.5044 |
| CHB | CSH | 123748708 | 2.9966  | 7.7931  | -1.8128 |
| CHB | CSH | 123753708 | 3.8565  | 5.9295  | -1.0036 |
| CHB | CSH | 123758708 | 5.3427  | 6.2684  | -0.4263 |
| CHB | CSH | 123763708 | 7.6648  | 7.6237  | 0.0158  |
| CHB | CSH | 123768708 | 19.0213 | 11.1814 | 2.1198  |
| CHB | CSH | 123773708 | 35.6686 | 16.9415 | 3.4144  |
| CHB | CSH | 123778708 | 40.5266 | 18.6357 | 3.6425  |
| CHB | CSH | 123783708 | 34.1809 | 16.4333 | 3.3315  |
| CHB | CSH | 123788708 | 29.959  | 16.0944 | 2.6549  |
| CHB | CSH | 123793708 | 19.8907 | 11.3508 | 2.2767  |
| CHB | CSH | 123798708 | 10.4618 | 8.1319  | 0.8469  |
| CHB | CSH | 123803708 | 8.5713  | 8.3013  | 0.0963  |
| CHB | CSH | 123808708 | 7.3135  | 5.4213  | 0.9922  |
| CHB | CSH | 123813708 | 9.4165  | 6.4378  | 1.3393  |
| CHB | CSH | 123818708 | 10.4677 | 7.7931  | 1.0109  |
| CHB | CSH | 123823708 | 7.2397  | 6.7766  | 0.1988  |
| CHB | CSH | 123828708 | 5.9608  | 7.1154  | -0.4742 |
| CHB | CSH | 123833708 | 6.739   | 7.2848  | -0.2194 |
| CHB | CSH | 123838708 | 9.7048  | 9.4872  | 0.0686  |
| CHB | CSH | 123843708 | 11.7932 | 10.1649 | 0.4813  |
| CHB | CSH | 123848708 | 13.748  | 9.6567  | 1.2686  |
| CHB | CSH | 123853708 | 16.0813 | 9.6567  | 1.9921  |
| CHB | CSH | 123858708 | 13.1144 | 9.4872  | 1.1434  |
| CHB | CSH | 123863708 | 12.6056 | 10.1649 | 0.7215  |
| CHB | CSH | 123868708 | 14.4531 | 9.4872  | 1.5654  |
| CHB | CSH | 123873708 | 14.0742 | 9.9955  | 1.2248  |
| CHB | CSH | 123878708 | 16.5237 | 12.0285 | 1.1348  |
| CHB | CSH | 123883708 | 13.1468 | 9.3178  | 1.2273  |
| CHB | CSH | 123888708 | 7.1018  | 7.1154  | -0.0056 |
| CHB | CSH | 123893708 | 9.3151  | 8.8096  | 0.1707  |
| CHB | CSH | 123898708 | 8.8888  | 9.4872  | -0.1886 |
| CHB | CSH | 123903708 | 12.4718 | 11.6896 | 0.2028  |
| CHB | CSH | 123908708 | 14.9533 | 11.3508 | 0.9604  |
| CHB | CSH | 123913708 | 11.8254 | 9.6567  | 0.6725  |

## 2\_TajimasD\_data

|     |     |           |         |         |         |
|-----|-----|-----------|---------|---------|---------|
| CHB | CSH | 123918708 | 12.6541 | 10.5037 | 0.6165  |
| CHB | CSH | 123923708 | 11.649  | 10.8426 | 0.2244  |
| CHB | CSH | 123928708 | 13.0067 | 11.8591 | 0.2936  |
| CHB | CSH | 123933708 | 13.4793 | 11.1814 | 0.6213  |
| CHB | CSH | 123938708 | 11.3914 | 9.6567  | 0.5379  |
| CHB | CSH | 123943708 | 10.4889 | 9.6567  | 0.258   |
| CHB | CSH | 123948708 | 8.6345  | 9.6567  | -0.317  |
| CHB | CSH | 123953708 | 10.5246 | 12.3673 | -0.4532 |
| CHB | CSH | 123958708 | 10.0873 | 11.8591 | -0.4533 |
| CHB | CSH | 123963708 | 10.7196 | 10.5037 | 0.0619  |
| CHB | CSH | 123968708 | 17.0739 | 13.5532 | 0.794   |
| CHB | CSH | 123973708 | 19.9305 | 15.2474 | 0.9443  |
| CHB | CSH | 123978708 | 20.6486 | 15.4168 | 1.0438  |
| CHB | CSH | 123983708 | 20.0211 | 16.2638 | 0.7123  |
| CHB | CSH | 123988708 | 15.4447 | 13.7226 | 0.3838  |
| CHB | CSH | 123993708 | 15.9821 | 12.1979 | 0.9428  |
| CHB | CSH | 123998708 | 24.4779 | 16.2638 | 1.5573  |
| CHB | CSH | 124003708 | 22.3306 | 15.925  | 1.2391  |
| CHB | CSH | 124008708 | 13.7811 | 11.8591 | 0.4917  |
| CHB | CSH | 124013708 | 10.4746 | 8.6402  | 0.6306  |
| CHB | CSH | 124018708 | 9.0609  | 7.4543  | 0.6324  |
| CHB | CSH | 124023708 | 11.5087 | 8.3013  | 1.1439  |
| CHB | CSH | 124028708 | 17.57   | 11.6896 | 1.525   |
| CHB | CSH | 124033708 | 22.4135 | 16.4333 | 1.1226  |
| CHB | CSH | 124038708 | 18.2216 | 13.7226 | 1.0027  |
| CHB | CSH | 124043708 | 10.6943 | 9.4872  | 0.3805  |
| CHB | CSH | 124048708 | 11.4026 | 10.1649 | 0.3659  |
| CHB | CSH | 124053708 | 15.2621 | 10.1649 | 1.5068  |
| CHB | CSH | 124058708 | 22.4763 | 13.045  | 2.2054  |
| CHB | CSH | 124063708 | 21.4285 | 13.2144 | 1.8974  |
| CHB | CSH | 124068708 | 11.4493 | 9.3178  | 0.6832  |
| CHB | CSH | 124073708 | 9.9975  | 9.8261  | 0.0523  |
| CHB | CSH | 124078708 | 8.2452  | 9.6567  | -0.4377 |
| CHB | CSH | 124083708 | 5.4693  | 7.2848  | -0.7298 |
| CHB | CSH | 124088708 | 4.331   | 6.0989  | -0.8345 |
| CHB | CSH | 124093708 | 5.2934  | 6.7766  | -0.6367 |
| CHB | CSH | 124098708 | 9.1732  | 8.6402  | 0.1832  |
| CHB | CSH | 124103708 | 9.9347  | 11.3508 | -0.3775 |
| CHB | CSH | 124108708 | 14.1826 | 11.5202 | 0.7     |
| CHB | CSH | 124113708 | 15.6366 | 8.979   | 2.2085  |
| CHB | CSH | 124118708 | 9.566   | 7.2848  | 0.917   |
| CHB | CSH | 124123708 | 10.7308 | 7.6237  | 1.1982  |
| CHB | CSH | 124128708 | 14.5237 | 9.3178  | 1.6687  |
| CHB | CSH | 124133708 | 19.9979 | 13.2144 | 1.567   |
| CHB | CSH | 124138708 | 16.5717 | 11.1814 | 1.4575  |
| CHB | CSH | 124143708 | 8.8134  | 5.7601  | 1.5169  |
| CHB | CSH | 124148708 | 9.2899  | 9.8261  | -0.1636 |
| CHB | CSH | 124153708 | 12.4531 | 13.2144 | -0.1759 |
| CHB | CSH | 124158708 | 12.0491 | 11.012  | 0.2845  |

## 2\_TajimasD\_data

|     |     |           |         |         |         |
|-----|-----|-----------|---------|---------|---------|
| CHB | CSH | 124163708 | 9.9895  | 9.8261  | 0.0499  |
| CHB | CSH | 124168708 | 10.8865 | 10.5037 | 0.1097  |
| CHB | CSH | 124173708 | 13.8475 | 12.0285 | 0.4592  |
| CHB | CSH | 124178708 | 12.728  | 9.9955  | 0.8205  |
| CHB | CSH | 124183708 | 8.9968  | 8.4708  | 0.1841  |
| CHB | CSH | 124188708 | 8.6025  | 9.8261  | -0.3733 |
| CHB | CSH | 124193708 | 9.0284  | 8.8096  | 0.0739  |
| CHB | CSH | 124198708 | 9.0739  | 8.1319  | 0.3424  |
| CHB | CSH | 124203708 | 11.8378 | 9.9955  | 0.5532  |
| CHB | CSH | 124208708 | 12.3735 | 10.1649 | 0.6529  |
| CHB | CSH | 124213708 | 9.1725  | 8.6402  | 0.183   |
| CHB | CSH | 124218708 | 9.8536  | 8.8096  | 0.3525  |
| CHB | CSH | 124223708 | 8.9642  | 7.1154  | 0.7592  |
| CHB | CSH | 124228708 | 9.0602  | 7.4543  | 0.6321  |
| CHB | CSH | 124233708 | 9.268   | 8.979   | 0.0959  |
| CHB | CSH | 124238708 | 6.7186  | 6.946   | -0.0955 |
| CHB | CSH | 124243708 | 5.2854  | 8.3013  | -1.0756 |
| CHB | CSH | 124248708 | 7.091   | 9.8261  | -0.8345 |
| CHB | CSH | 124253708 | 8.5814  | 8.6402  | -0.0202 |
| CHB | CSH | 124258708 | 9.7529  | 9.1484  | 0.1971  |
| CHB | CSH | 124263708 | 10.2507 | 9.3178  | 0.299   |
| CHB | CSH | 124268708 | 16.792  | 13.2144 | 0.8264  |
| CHB | CSH | 124273708 | 14.3787 | 11.3508 | 0.8072  |
| CHB | CSH | 124278708 | 5.3318  | 5.5907  | -0.1321 |
| CHB | CSH | 124283708 | 7.0923  | 6.4378  | 0.2943  |
| CHB | CSH | 124288708 | 6.7651  | 5.7601  | 0.4993  |
| CHB | CSH | 124293708 | 5.7954  | 5.2519  | 0.2931  |
| CHB | CSH | 124298708 | 12.8241 | 10.6731 | 0.6075  |
| CHB | CSH | 124303708 | 18.0047 | 13.5532 | 1.0039  |
| CHB | CSH | 124308708 | 12.0622 | 8.6402  | 1.1763  |
| CHB | CSH | 124313708 | 9.6966  | 7.4543  | 0.8826  |
| CHB | CSH | 124318708 | 10.0692 | 8.6402  | 0.4912  |
| CHB | CSH | 124323708 | 9.6034  | 8.8096  | 0.268   |
| CHB | CSH | 124328708 | 9.4057  | 8.1319  | 0.463   |
| CHB | CSH | 124333708 | 7.5389  | 6.7766  | 0.3272  |
| CHB | CSH | 124338708 | 5.3122  | 5.5907  | -0.1421 |
| CHB | CSH | 124343708 | 8.1734  | 6.946   | 0.5152  |
| CHB | CSH | 124348708 | 10.8136 | 8.1319  | 0.9747  |
| CHB | CSH | 124353708 | 8.909   | 7.7931  | 0.4218  |
| CHB | CSH | 124358708 | 7.1698  | 6.6072  | 0.2471  |
| CHB | CSH | 124363708 | 9.7769  | 6.0989  | 1.7362  |
| CHB | CSH | 124368708 | 16.8858 | 12.5367 | 1.0559  |
| YRI | CSH | 123268708 | 7.4349  | 10.2518 | -0.8233 |
| YRI | CSH | 123273708 | 7.2769  | 9.7476  | -0.7569 |
| YRI | CSH | 123278708 | 4.4058  | 9.7476  | -1.6364 |
| YRI | CSH | 123283708 | 3.6749  | 9.4115  | -1.8156 |
| YRI | CSH | 123288708 | 6.589   | 9.9157  | -1.003  |
| YRI | CSH | 123293708 | 7.9026  | 11.0921 | -0.866  |
| YRI | CSH | 123298708 | 6.7699  | 8.235   | -0.5246 |

## 2\_TajimasD\_data

|     |     |           |         |         |         |
|-----|-----|-----------|---------|---------|---------|
| YRI | CSH | 123303708 | 9.107   | 8.7392  | 0.1247  |
| YRI | CSH | 123308708 | 8.1512  | 10.2518 | -0.6139 |
| YRI | CSH | 123313708 | 8.0275  | 11.7644 | -0.96   |
| YRI | CSH | 123318708 | 10.8879 | 11.9324 | -0.2648 |
| YRI | CSH | 123323708 | 11.0035 | 11.9324 | -0.2355 |
| YRI | CSH | 123328708 | 10.1058 | 13.1089 | -0.6966 |
| YRI | CSH | 123333708 | 8.1733  | 11.9324 | -0.9529 |
| YRI | CSH | 123338708 | 7.5828  | 10.4199 | -0.8167 |
| YRI | CSH | 123343708 | 7.762   | 8.7392  | -0.3312 |
| YRI | CSH | 123348708 | 7.3935  | 9.2434  | -0.5953 |
| YRI | CSH | 123353708 | 8.4875  | 11.7644 | -0.8419 |
| YRI | CSH | 123358708 | 9.8393  | 12.9408 | -0.7283 |
| YRI | CSH | 123363708 | 9.6461  | 13.7811 | -0.9148 |
| YRI | CSH | 123368708 | 8.4789  | 12.2685 | -0.9358 |
| YRI | CSH | 123373708 | 11.7937 | 12.2685 | -0.1173 |
| YRI | CSH | 123378708 | 13.0331 | 13.7811 | -0.1655 |
| YRI | CSH | 123383708 | 8.091   | 10.924  | -0.7803 |
| YRI | CSH | 123388708 | 6.3917  | 7.7309  | -0.5081 |
| YRI | CSH | 123393708 | 8.2549  | 9.5795  | -0.4124 |
| YRI | CSH | 123398708 | 11.2363 | 13.9492 | -0.5933 |
| YRI | CSH | 123403708 | 10.2343 | 14.6214 | -0.9175 |
| YRI | CSH | 123408708 | 6.0864  | 13.445  | -1.6665 |
| YRI | CSH | 123413708 | 4.8937  | 13.1089 | -1.9056 |
| YRI | CSH | 123418708 | 6.2214  | 13.1089 | -1.5977 |
| YRI | CSH | 123423708 | 7.6012  | 12.1005 | -1.1256 |
| YRI | CSH | 123428708 | 8.4984  | 11.4282 | -0.7735 |
| YRI | CSH | 123433708 | 6.6244  | 9.7476  | -0.9568 |
| YRI | CSH | 123438708 | 6.4629  | 8.235   | -0.6345 |
| YRI | CSH | 123443708 | 8.7987  | 10.2518 | -0.4247 |
| YRI | CSH | 123448708 | 6.2558  | 12.7727 | -1.5493 |
| YRI | CSH | 123453708 | 4.4654  | 11.5963 | -1.8569 |
| YRI | CSH | 123458708 | 4.1798  | 7.3947  | -1.2704 |
| YRI | CSH | 123463708 | 4.9842  | 7.8989  | -1.0843 |
| YRI | CSH | 123468708 | 4.8766  | 8.067   | -1.1642 |
| YRI | CSH | 123473708 | 5.3296  | 7.8989  | -0.9558 |
| YRI | CSH | 123478708 | 7.3948  | 10.0837 | -0.7981 |
| YRI | CSH | 123483708 | 6.3925  | 9.7476  | -1.0278 |
| YRI | CSH | 123488708 | 6.0789  | 9.2434  | -1.0184 |
| YRI | CSH | 123493708 | 8.3733  | 10.0837 | -0.5077 |
| YRI | CSH | 123498708 | 8.4619  | 8.9073  | -0.1483 |
| YRI | CSH | 123503708 | 5.8669  | 8.7392  | -0.9736 |
| YRI | CSH | 123508708 | 5.0164  | 10.4199 | -1.5555 |
| YRI | CSH | 123513708 | 5.952   | 11.5963 | -1.4698 |
| YRI | CSH | 123518708 | 4.8781  | 10.5879 | -1.6193 |
| YRI | CSH | 123523708 | 4.0794  | 9.0754  | -1.6354 |
| YRI | CSH | 123528708 | 5.7068  | 9.9157  | -1.269  |
| YRI | CSH | 123533708 | 7.5771  | 11.7644 | -1.0757 |
| YRI | CSH | 123538708 | 8.8323  | 12.9408 | -0.9647 |
| YRI | CSH | 123543708 | 7.4772  | 9.9157  | -0.7352 |

## 2\_TajimasD\_data

|     |     |           |         |         |         |
|-----|-----|-----------|---------|---------|---------|
| YRI | CSH | 123548708 | 6.3491  | 8.7392  | -0.8102 |
| YRI | CSH | 123553708 | 7.1483  | 11.9324 | -1.2128 |
| YRI | CSH | 123558708 | 4.9601  | 10.0837 | -1.5208 |
| YRI | CSH | 123563708 | 2.8403  | 8.9073  | -2.0207 |
| YRI | CSH | 123568708 | 3.6533  | 8.235   | -1.6405 |
| YRI | CSH | 123573708 | 7.5033  | 8.5712  | -0.3685 |
| YRI | CSH | 123578708 | 8.0166  | 9.9157  | -0.5726 |
| YRI | CSH | 123583708 | 6.3474  | 7.2267  | -0.3548 |
| YRI | CSH | 123588708 | 7.4727  | 7.8989  | -0.1586 |
| YRI | CSH | 123593708 | 5.7324  | 8.7392  | -1.0192 |
| YRI | CSH | 123598708 | 8.2953  | 10.5879 | -0.6502 |
| YRI | CSH | 123603708 | 16.8197 | 13.7811 | 0.6722  |
| YRI | CSH | 123608708 | 18.9455 | 15.6298 | 0.6507  |
| YRI | CSH | 123613708 | 11.6187 | 13.1089 | -0.3457 |
| YRI | CSH | 123618708 | 7.7452  | 11.0921 | -0.9087 |
| YRI | CSH | 123623708 | 10.3186 | 13.9492 | -0.794  |
| YRI | CSH | 123628708 | 8.697   | 13.445  | -1.0753 |
| YRI | CSH | 123633708 | 6.3181  | 10.756  | -1.2402 |
| YRI | CSH | 123638708 | 8.512   | 10.5879 | -0.5887 |
| YRI | CSH | 123643708 | 8.83    | 10.924  | -0.5767 |
| YRI | CSH | 123648708 | 7.8111  | 11.2602 | -0.9233 |
| YRI | CSH | 123653708 | 8.7404  | 11.9324 | -0.8092 |
| YRI | CSH | 123658708 | 12.0429 | 11.9324 | 0.028   |
| YRI | CSH | 123663708 | 12.6893 | 12.1005 | 0.1473  |
| YRI | CSH | 123668708 | 9.6717  | 11.7644 | -0.5376 |
| YRI | CSH | 123673708 | 11.3387 | 11.0921 | 0.067   |
| YRI | CSH | 123678708 | 12.9948 | 12.6047 | 0.0939  |
| YRI | CSH | 123683708 | 12.0112 | 12.1005 | -0.0223 |
| YRI | CSH | 123688708 | 10.7708 | 9.9157  | 0.2578  |
| YRI | CSH | 123693708 | 9.9881  | 10.4199 | -0.1243 |
| YRI | CSH | 123698708 | 13.0488 | 13.2769 | -0.0523 |
| YRI | CSH | 123703708 | 14.256  | 15.1256 | -0.1761 |
| YRI | CSH | 123708708 | 9.8206  | 12.2685 | -0.6045 |
| YRI | CSH | 123713708 | 9.922   | 11.2602 | -0.3582 |
| YRI | CSH | 123718708 | 11.2552 | 13.2769 | -0.4633 |
| YRI | CSH | 123723708 | 7.022   | 11.9324 | -1.2448 |
| YRI | CSH | 123728708 | 5.7375  | 9.2434  | -1.1283 |
| YRI | CSH | 123733708 | 7.9515  | 10.2518 | -0.6723 |
| YRI | CSH | 123738708 | 10.8443 | 12.4366 | -0.3882 |
| YRI | CSH | 123743708 | 12.1134 | 12.6047 | -0.1183 |
| YRI | CSH | 123748708 | 9.1103  | 9.9157  | -0.2428 |
| YRI | CSH | 123753708 | 7.8326  | 9.4115  | -0.4997 |
| YRI | CSH | 123758708 | 10.0112 | 10.0837 | -0.0215 |
| YRI | CSH | 123763708 | 10.9163 | 11.0921 | -0.0477 |
| YRI | CSH | 123768708 | 19.863  | 15.1256 | 0.9593  |
| YRI | CSH | 123773708 | 38.1721 | 19.9994 | 2.8156  |
| YRI | CSH | 123778708 | 42.9804 | 21.68   | 3.053   |
| YRI | CSH | 123783708 | 36.1546 | 18.991  | 2.795   |
| YRI | CSH | 123788708 | 33.3974 | 18.1507 | 2.5932  |

## 2\_TajimasD\_data

|     |     |           |         |         |         |
|-----|-----|-----------|---------|---------|---------|
| YRI | CSH | 123793708 | 21.4446 | 15.1256 | 1.2795  |
| YRI | CSH | 123798708 | 11.7175 | 13.9492 | -0.4881 |
| YRI | CSH | 123803708 | 11.6244 | 14.7895 | -0.6548 |
| YRI | CSH | 123808708 | 8.1729  | 11.9324 | -0.953  |
| YRI | CSH | 123813708 | 8.8333  | 11.0921 | -0.6133 |
| YRI | CSH | 123818708 | 10.338  | 11.2602 | -0.2469 |
| YRI | CSH | 123823708 | 10.2152 | 11.9324 | -0.4353 |
| YRI | CSH | 123828708 | 10.3673 | 13.445  | -0.697  |
| YRI | CSH | 123833708 | 10.2462 | 12.4366 | -0.534  |
| YRI | CSH | 123838708 | 12.542  | 12.9408 | -0.0936 |
| YRI | CSH | 123843708 | 14.0305 | 14.9575 | -0.1897 |
| YRI | CSH | 123848708 | 13.1451 | 16.4701 | -0.6207 |
| YRI | CSH | 123853708 | 12.0198 | 16.4701 | -0.8308 |
| YRI | CSH | 123858708 | 11.7248 | 17.8146 | -1.0545 |
| YRI | CSH | 123863708 | 13.8402 | 16.9743 | -0.5684 |
| YRI | CSH | 123868708 | 12.4799 | 16.302  | -0.7205 |
| YRI | CSH | 123873708 | 10.4984 | 21.1758 | -1.5656 |
| YRI | CSH | 123878708 | 15.2396 | 25.0413 | -1.2219 |
| YRI | CSH | 123883708 | 13.286  | 21.3439 | -1.1725 |
| YRI | CSH | 123888708 | 8.4965  | 13.7811 | -1.1691 |
| YRI | CSH | 123893708 | 11.2042 | 13.445  | -0.5075 |
| YRI | CSH | 123898708 | 12.3806 | 15.6298 | -0.6377 |
| YRI | CSH | 123903708 | 15.8761 | 17.1423 | -0.2275 |
| YRI | CSH | 123908708 | 16.3579 | 16.9743 | -0.1118 |
| YRI | CSH | 123913708 | 13.6421 | 15.2937 | -0.3309 |
| YRI | CSH | 123918708 | 14.0832 | 13.613  | 0.1052  |
| YRI | CSH | 123923708 | 14.1613 | 15.2937 | -0.2269 |
| YRI | CSH | 123928708 | 15.4258 | 17.4785 | -0.362  |
| YRI | CSH | 123933708 | 14.2306 | 13.9492 | 0.0615  |
| YRI | CSH | 123938708 | 11.4851 | 12.2685 | -0.1935 |
| YRI | CSH | 123943708 | 11.5723 | 13.2769 | -0.3907 |
| YRI | CSH | 123948708 | 14.0679 | 14.6214 | -0.1158 |
| YRI | CSH | 123953708 | 18.5924 | 19.9994 | -0.218  |
| YRI | CSH | 123958708 | 16.6561 | 19.3272 | -0.4277 |
| YRI | CSH | 123963708 | 15.1732 | 15.2937 | -0.0241 |
| YRI | CSH | 123968708 | 21.0106 | 15.4617 | 1.1003  |
| YRI | CSH | 123973708 | 26.0877 | 17.3104 | 1.5623  |
| YRI | CSH | 123978708 | 26.4053 | 19.4952 | 1.0973  |
| YRI | CSH | 123983708 | 21.5683 | 19.1591 | 0.389   |
| YRI | CSH | 123988708 | 16.9064 | 17.4785 | -0.1009 |
| YRI | CSH | 123993708 | 16.3097 | 15.9659 | 0.0661  |
| YRI | CSH | 123998708 | 29.0164 | 18.3188 | 1.8035  |
| YRI | CSH | 124003708 | 32.6686 | 18.6549 | 2.3216  |
| YRI | CSH | 124008708 | 19.7224 | 15.2937 | 0.8874  |
| YRI | CSH | 124013708 | 11.8482 | 12.2685 | -0.1038 |
| YRI | CSH | 124018708 | 9.5892  | 11.4282 | -0.4855 |
| YRI | CSH | 124023708 | 12.0617 | 11.5963 | 0.1212  |
| YRI | CSH | 124028708 | 20.1066 | 14.4534 | 1.1953  |
| YRI | CSH | 124033708 | 25.7176 | 17.8146 | 1.3685  |

## 2\_TajimasD\_data

|     |     |           |         |         |         |
|-----|-----|-----------|---------|---------|---------|
| YRI | CSH | 124038708 | 18.8864 | 15.2937 | 0.7199  |
| YRI | CSH | 124043708 | 9.8628  | 12.7727 | -0.6918 |
| YRI | CSH | 124048708 | 10.7412 | 13.7811 | -0.6725 |
| YRI | CSH | 124053708 | 14.679  | 15.1256 | -0.0904 |
| YRI | CSH | 124058708 | 21.9334 | 17.9827 | 0.678   |
| YRI | CSH | 124063708 | 19.9784 | 15.9659 | 0.7717  |
| YRI | CSH | 124068708 | 9.357   | 11.5963 | -0.5831 |
| YRI | CSH | 124073708 | 9.5562  | 12.7727 | -0.7647 |
| YRI | CSH | 124078708 | 8.3784  | 11.4282 | -0.8052 |
| YRI | CSH | 124083708 | 6.1652  | 9.0754  | -0.9526 |
| YRI | CSH | 124088708 | 4.8291  | 8.235   | -1.2195 |
| YRI | CSH | 124093708 | 5.9637  | 9.7476  | -1.1592 |
| YRI | CSH | 124098708 | 10.4765 | 13.2769 | -0.6418 |
| YRI | CSH | 124103708 | 11.5898 | 16.6382 | -0.9333 |
| YRI | CSH | 124108708 | 14.3876 | 18.3188 | -0.6627 |
| YRI | CSH | 124113708 | 14.1949 | 16.302  | -0.3972 |
| YRI | CSH | 124118708 | 9.8142  | 13.2769 | -0.7936 |
| YRI | CSH | 124123708 | 10.9148 | 11.7644 | -0.2183 |
| YRI | CSH | 124128708 | 14.1389 | 13.1089 | 0.2389  |
| YRI | CSH | 124133708 | 16.8268 | 16.8062 | 0.0038  |
| YRI | CSH | 124138708 | 13.3245 | 16.6382 | -0.6126 |
| YRI | CSH | 124143708 | 9.9055  | 16.302  | -1.2059 |
| YRI | CSH | 124148708 | 18.267  | 19.4952 | -0.195  |
| YRI | CSH | 124153708 | 21.0999 | 20.6717 | 0.0643  |
| YRI | CSH | 124158708 | 14.7731 | 17.6465 | -0.5021 |
| YRI | CSH | 124163708 | 12.3078 | 14.1172 | -0.3912 |
| YRI | CSH | 124168708 | 13.0607 | 15.2937 | -0.4474 |
| YRI | CSH | 124173708 | 17.4704 | 16.4701 | 0.1867  |
| YRI | CSH | 124178708 | 15.1966 | 12.2685 | 0.7231  |
| YRI | CSH | 124183708 | 12.0854 | 10.924  | 0.3199  |
| YRI | CSH | 124188708 | 13.0615 | 13.445  | -0.0869 |
| YRI | CSH | 124193708 | 10.1712 | 13.9492 | -0.8262 |
| YRI | CSH | 124198708 | 9.4714  | 13.613  | -0.927  |
| YRI | CSH | 124203708 | 12.589  | 15.4617 | -0.5696 |
| YRI | CSH | 124208708 | 14.24   | 15.4617 | -0.2423 |
| YRI | CSH | 124213708 | 11.4548 | 11.4282 | 0.007   |
| YRI | CSH | 124218708 | 9.3812  | 10.4199 | -0.299  |
| YRI | CSH | 124223708 | 8.9139  | 11.0921 | -0.5914 |
| YRI | CSH | 124228708 | 11.5537 | 13.1089 | -0.3608 |
| YRI | CSH | 124233708 | 13.4883 | 14.4534 | -0.2041 |
| YRI | CSH | 124238708 | 9.9994  | 12.1005 | -0.5257 |
| YRI | CSH | 124243708 | 10.6882 | 13.613  | -0.6546 |
| YRI | CSH | 124248708 | 12.5012 | 15.7978 | -0.6404 |
| YRI | CSH | 124253708 | 12.5106 | 14.6214 | -0.4414 |
| YRI | CSH | 124258708 | 14.5355 | 13.9492 | 0.1282  |
| YRI | CSH | 124263708 | 14.0022 | 14.6214 | -0.1295 |
| YRI | CSH | 124268708 | 19.7978 | 18.6549 | 0.1893  |
| YRI | CSH | 124273708 | 17.571  | 17.1423 | 0.077   |
| YRI | CSH | 124278708 | 10.8619 | 13.445  | -0.585  |



## 2\_TajimasD\_data

|     |     |           |         |         |         |
|-----|-----|-----------|---------|---------|---------|
| YRI | CSH | 124283708 | 11.7322 | 14.2853 | -0.5459 |
| YRI | CSH | 124288708 | 8.9775  | 12.4366 | -0.8433 |
| YRI | CSH | 124293708 | 8.4656  | 11.0921 | -0.7131 |
| YRI | CSH | 124298708 | 18.843  | 19.8313 | -0.1544 |
| YRI | CSH | 124303708 | 23.2848 | 22.8565 | 0.0583  |
| YRI | CSH | 124308708 | 14.9033 | 14.7895 | 0.0235  |
| YRI | CSH | 124313708 | 11.8254 | 12.7727 | -0.2252 |
| YRI | CSH | 124318708 | 11.7558 | 12.6047 | -0.2044 |
| YRI | CSH | 124323708 | 12.5787 | 12.4366 | 0.0346  |
| YRI | CSH | 124328708 | 11.7426 | 11.9324 | -0.0481 |
| YRI | CSH | 124333708 | 9.0592  | 11.0921 | -0.5519 |
| YRI | CSH | 124338708 | 6.1991  | 11.5963 | -1.4055 |
| YRI | CSH | 124343708 | 9.1911  | 13.1089 | -0.9088 |
| YRI | CSH | 124348708 | 11.6453 | 13.9492 | -0.5039 |
| YRI | CSH | 124353708 | 9.5582  | 13.9492 | -0.9603 |
| YRI | CSH | 124358708 | 8.9911  | 14.7895 | -1.1995 |
| YRI | CSH | 124363708 | 10.6477 | 15.9659 | -1.0228 |
| YRI | CSH | 124368708 | 18.3023 | 23.1926 | -0.6567 |
| CEU | CSH | 80586945  | 10.3585 | 12.6216 | -0.5475 |
| CEU | CSH | 80591945  | 8.8089  | 11.9394 | -0.7981 |
| CEU | CSH | 80596945  | 11.1833 | 10.7454 | 0.1233  |
| CEU | CSH | 80601945  | 8.4234  | 8.0164  | 0.1503  |
| CEU | CSH | 80606945  | 7.4113  | 8.6987  | -0.4411 |
| CEU | CSH | 80611945  | 10.5723 | 11.4277 | -0.2273 |
| CEU | CSH | 80616945  | 8.7396  | 8.6987  | 0.014   |
| CEU | CSH | 80621945  | 8.0854  | 7.3342  | 0.301   |
| CEU | CSH | 80626945  | 7.8597  | 8.0164  | -0.0579 |
| CEU | CSH | 80631945  | 7.752   | 7.5047  | 0.097   |
| CEU | CSH | 80636945  | 14.7353 | 11.0866 | 0.9974  |
| CEU | CSH | 80641945  | 12.9227 | 12.1099 | 0.2045  |
| CEU | CSH | 80646945  | 7.1227  | 9.7221  | -0.8033 |
| CEU | CSH | 80651945  | 9.334   | 10.2337 | -0.2651 |
| CEU | CSH | 80656945  | 9.8975  | 10.2337 | -0.099  |
| CEU | CSH | 80661945  | 8.303   | 9.7221  | -0.4385 |
| CEU | CSH | 80666945  | 10.1828 | 12.7922 | -0.6234 |
| CEU | CSH | 80671945  | 11.4315 | 14.1567 | -0.5914 |
| CEU | CSH | 80676945  | 12.7785 | 12.2805 | 0.1236  |
| CEU | CSH | 80681945  | 11.7548 | 10.2337 | 0.4481  |
| CEU | CSH | 80686945  | 8.3913  | 9.5515  | -0.3645 |
| CEU | CSH | 80691945  | 8.0757  | 9.0398  | -0.3188 |
| CEU | CSH | 80696945  | 10.2261 | 9.7221  | 0.1558  |
| CEU | CSH | 80701945  | 17.2602 | 13.4744 | 0.861   |
| CEU | CSH | 80706945  | 17.395  | 16.7151 | 0.1259  |
| CEU | CSH | 80711945  | 11.8384 | 15.1801 | -0.6786 |
| CEU | CSH | 80716945  | 10.8437 | 12.4511 | -0.3939 |
| CEU | CSH | 80721945  | 10.494  | 12.9627 | -0.5824 |
| CEU | CSH | 80726945  | 10.7991 | 11.5982 | -0.2094 |
| CEU | CSH | 80731945  | 10.4137 | 10.0632 | 0.1049  |
| CEU | CSH | 80736945  | 7.0763  | 9.7221  | -0.8176 |

## 2\_TajimasD\_data

|     |     |          |         |         |         |
|-----|-----|----------|---------|---------|---------|
| CEU | CSH | 80741945 | 8.719   | 12.2805 | -0.8842 |
| CEU | CSH | 80746945 | 10.2705 | 12.2805 | -0.499  |
| CEU | CSH | 80751945 | 8.6308  | 9.8926  | -0.3837 |
| CEU | CSH | 80756945 | 9.7015  | 10.7454 | -0.2938 |
| CEU | CSH | 80761945 | 14.4191 | 12.7922 | 0.3886  |
| CEU | CSH | 80766945 | 14.8035 | 11.7688 | 0.7843  |
| CEU | CSH | 80771945 | 9.6595  | 9.7221  | -0.0193 |
| CEU | CSH | 80776945 | 8.7598  | 9.8926  | -0.3444 |
| CEU | CSH | 80781945 | 11.5215 | 9.3809  | 0.6838  |
| CEU | CSH | 80786945 | 12.0237 | 10.4043 | 0.4698  |
| CEU | CSH | 80791945 | 9.4824  | 12.4511 | -0.7275 |
| CEU | CSH | 80796945 | 7.9175  | 10.5749 | -0.7593 |
| CEU | CSH | 80801945 | 6.0989  | 8.6987  | -0.8907 |
| CEU | CSH | 80806945 | 6.9261  | 11.5982 | -1.2241 |
| CEU | CSH | 80811945 | 7.9485  | 12.1099 | -1.0469 |
| CEU | CSH | 80816945 | 6.4041  | 9.3809  | -0.951  |
| CEU | CSH | 80821945 | 4.8093  | 7.3342  | -1.0117 |
| CEU | CSH | 80826945 | 2.9759  | 6.9931  | -1.6809 |
| CEU | CSH | 80831945 | 3.7557  | 7.8459  | -1.5408 |
| CEU | CSH | 80836945 | 7.2523  | 10.2337 | -0.8783 |
| CEU | CSH | 80841945 | 11.235  | 12.1099 | -0.2201 |
| CEU | CSH | 80846945 | 9.9899  | 9.3809  | 0.1946  |
| CEU | CSH | 80851945 | 6.3016  | 6.6519  | -0.1534 |
| CEU | CSH | 80856945 | 4.5611  | 6.9931  | -1.0176 |
| CEU | CSH | 80861945 | 6.348   | 10.2337 | -1.1448 |
| CEU | CSH | 80866945 | 7.5968  | 11.0866 | -0.9539 |
| CEU | CSH | 80871945 | 5.7271  | 9.5515  | -1.2015 |
| CEU | CSH | 80876945 | 5.691   | 9.0398  | -1.1072 |
| CEU | CSH | 80881945 | 8.3302  | 8.5281  | -0.069  |
| CEU | CSH | 80886945 | 13.4263 | 11.9394 | 0.3791  |
| CEU | CSH | 80891945 | 25.3354 | 16.7151 | 1.5966  |
| CEU | CSH | 80896945 | 32.5995 | 17.9091 | 2.5468  |
| CEU | CSH | 80901945 | 25.853  | 15.5212 | 2.054   |
| CEU | CSH | 80906945 | 17.9872 | 13.8156 | 0.9265  |
| CEU | CSH | 80911945 | 14.5537 | 13.4744 | 0.2455  |
| CEU | CSH | 80916945 | 13.0522 | 12.9627 | 0.0211  |
| CEU | CSH | 80921945 | 14.3228 | 12.7922 | 0.3656  |
| CEU | CSH | 80926945 | 17.2016 | 13.9861 | 0.7059  |
| CEU | CSH | 80931945 | 21.3501 | 17.0562 | 0.7801  |
| CEU | CSH | 80936945 | 21.1215 | 17.0562 | 0.7385  |
| CEU | CSH | 80941945 | 12.9229 | 14.6684 | -0.3662 |
| CEU | CSH | 80946945 | 8.3865  | 15.5212 | -1.4184 |
| CEU | CSH | 80951945 | 8.9437  | 14.3272 | -1.155  |
| CEU | CSH | 80956945 | 9.7976  | 12.1099 | -0.5817 |
| CEU | CSH | 80961945 | 13.0229 | 13.645  | -0.1398 |
| CEU | CSH | 80966945 | 16.9891 | 14.3272 | 0.5711  |
| CEU | CSH | 80971945 | 12.6595 | 12.2805 | 0.0941  |
| CEU | CSH | 80976945 | 7.382   | 11.4277 | -1.0749 |
| CEU | CSH | 80981945 | 7.9973  | 14.4978 | -1.3791 |

## 2\_TajimasD\_data

|     |     |          |         |         |         |
|-----|-----|----------|---------|---------|---------|
| CEU | CSH | 80986945 | 19.6477 | 21.1497 | -0.2219 |
| CEU | CSH | 80991945 | 23.8654 | 21.832  | 0.2913  |
| CEU | CSH | 80996945 | 20.482  | 20.2969 | 0.0284  |
| CEU | CSH | 81001945 | 23.3408 | 21.1497 | 0.3237  |
| CEU | CSH | 81006945 | 15.6444 | 15.6917 | -0.0093 |
| CEU | CSH | 81011945 | 8.7941  | 12.4511 | -0.8962 |
| CEU | CSH | 81016945 | 10.8048 | 13.3039 | -0.5753 |
| CEU | CSH | 81021945 | 19.7924 | 16.5446 | 0.6075  |
| CEU | CSH | 81026945 | 23.0569 | 16.8857 | 1.1319  |
| CEU | CSH | 81031945 | 23.9532 | 18.0796 | 1.0091  |
| CEU | CSH | 81036945 | 22.0844 | 17.9091 | 0.7239  |
| CEU | CSH | 81041945 | 13.7321 | 12.7922 | 0.2245  |
| CEU | CSH | 81046945 | 12.6498 | 12.2805 | 0.0917  |
| CEU | CSH | 81051945 | 10.8773 | 11.2571 | -0.1023 |
| CEU | CSH | 81056945 | 8.5842  | 10.2337 | -0.486  |
| CEU | CSH | 81061945 | 8.4329  | 11.2571 | -0.761  |
| CEU | CSH | 81066945 | 6.893   | 11.4277 | -1.2048 |
| CEU | CSH | 81071945 | 4.0674  | 9.8926  | -1.7713 |
| CEU | CSH | 81076945 | 4.0198  | 9.5515  | -1.7378 |
| CEU | CSH | 81081945 | 5.0177  | 9.7221  | -1.4538 |
| CEU | CSH | 81086945 | 7.4399  | 12.1099 | -1.1748 |
| CEU | CSH | 81091945 | 7.4762  | 12.1099 | -1.1657 |
| CEU | CSH | 81096945 | 5.4661  | 9.7221  | -1.3152 |
| CEU | CSH | 81101945 | 5.9392  | 10.916  | -1.3803 |
| CEU | CSH | 81106945 | 7.0369  | 11.5982 | -1.1951 |
| CEU | CSH | 81111945 | 13.7105 | 17.0562 | -0.6078 |
| CEU | CSH | 81116945 | 16.5095 | 20.1264 | -0.5605 |
| CEU | CSH | 81121945 | 8.4605  | 13.3039 | -1.1149 |
| CEU | CSH | 81126945 | 7.8728  | 14.8389 | -1.4455 |
| CEU | CSH | 81131945 | 7.9419  | 14.1567 | -1.3487 |
| CEU | CSH | 81136945 | 5.7854  | 9.0398  | -1.076  |
| CEU | CSH | 81141945 | 15.1126 | 13.9861 | 0.2473  |
| CEU | CSH | 81146945 | 18.6539 | 19.4441 | -0.1266 |
| CEU | CSH | 81151945 | 14.928  | 22.6848 | -1.0708 |
| CEU | CSH | 81156945 | 24.8987 | 23.3671 | 0.2055  |
| CEU | CSH | 81161945 | 27.2278 | 21.1497 | 0.8978  |
| CEU | CSH | 81166945 | 24.0472 | 22.6848 | 0.1881  |
| CEU | CSH | 81171945 | 26.8598 | 24.2199 | 0.342   |
| CEU | CSH | 81176945 | 20.7394 | 20.9792 | -0.0357 |
| CEU | CSH | 81181945 | 20.8103 | 25.7549 | -0.6035 |
| CEU | CSH | 81186945 | 25.2136 | 30.1896 | -0.5204 |
| CEU | CSH | 81191945 | 21.9584 | 21.832  | 0.0181  |
| CEU | CSH | 81196945 | 31.5632 | 19.103  | 2.0303  |
| CEU | CSH | 81201945 | 45.7918 | 23.8787 | 2.8784  |
| CEU | CSH | 81206945 | 39.2177 | 25.0727 | 1.7722  |
| CEU | CSH | 81211945 | 23.9546 | 22.0026 | 0.2775  |
| CEU | CSH | 81216945 | 15.3317 | 19.103  | -0.6145 |
| CEU | CSH | 81221945 | 15.3865 | 17.2268 | -0.3312 |
| CEU | CSH | 81226945 | 14.7835 | 16.7151 | -0.3578 |

## 2\_TajimasD\_data

|     |     |          |         |         |         |
|-----|-----|----------|---------|---------|---------|
| CEU | CSH | 81231945 | 12.1429 | 16.374  | -0.7993 |
| CEU | CSH | 81236945 | 31.2088 | 22.3437 | 1.2418  |
| CEU | CSH | 81241945 | 56.831  | 30.7012 | 2.6881  |
| CEU | CSH | 81246945 | 45.3506 | 23.0259 | 3.0376  |
| CEU | CSH | 81251945 | 32.4692 | 17.0562 | 2.8     |
| CEU | CSH | 81256945 | 36.4492 | 18.7619 | 2.9324  |
| CEU | CSH | 81261945 | 26.041  | 14.6684 | 2.386   |
| CEU | CSH | 81266945 | 11.6436 | 9.2104  | 0.7907  |
| CEU | CSH | 81271945 | 11.6858 | 10.4043 | 0.3718  |
| CEU | CSH | 81276945 | 19.2962 | 14.8389 | 0.9249  |
| CEU | CSH | 81281945 | 21.9256 | 16.5446 | 1.0065  |
| CEU | CSH | 81286945 | 15.3911 | 13.1333 | 0.5261  |
| CEU | CSH | 81291945 | 7.9897  | 7.8459  | 0.0542  |
| CEU | CSH | 81296945 | 8.1449  | 8.8692  | -0.2437 |
| CEU | CSH | 81301945 | 11.0908 | 12.9627 | -0.4416 |
| CEU | CSH | 81306945 | 12.3989 | 11.7688 | 0.1628  |
| CEU | CSH | 81311945 | 9.9296  | 8.8692  | 0.3568  |
| CEU | CSH | 81316945 | 7.4393  | 8.5281  | -0.3799 |
| CEU | CSH | 81321945 | 5.658   | 7.6753  | -0.7754 |
| CEU | CSH | 81326945 | 7.8932  | 8.187   | -0.1064 |
| CEU | CSH | 81331945 | 10.8341 | 9.8926  | 0.2863  |
| CEU | CSH | 81336945 | 9.8563  | 9.5515  | 0.0958  |
| CEU | CSH | 81341945 | 7.1715  | 8.8692  | -0.5713 |
| CEU | CSH | 81346945 | 5.3438  | 10.5749 | -1.4946 |
| CEU | CSH | 81351945 | 6.6098  | 12.6216 | -1.4545 |
| CEU | CSH | 81356945 | 8.6211  | 14.4978 | -1.2468 |
| CEU | CSH | 81361945 | 10.3741 | 16.5446 | -1.1541 |
| CEU | CSH | 81366945 | 13.9344 | 17.5679 | -0.6417 |
| CEU | CSH | 81371945 | 16.1674 | 16.5446 | -0.0706 |
| CEU | CSH | 81376945 | 11.757  | 13.3039 | -0.3561 |
| CEU | CSH | 81381945 | 9.584   | 13.1333 | -0.827  |
| CEU | CSH | 81386945 | 10.3878 | 14.4978 | -0.8719 |
| CEU | CSH | 81391945 | 12.4993 | 16.2034 | -0.7068 |
| CEU | CSH | 81396945 | 15.33   | 14.6684 | 0.1388  |
| CEU | CSH | 81401945 | 14.5733 | 13.4744 | 0.2499  |
| CEU | CSH | 81406945 | 13.3135 | 15.1801 | -0.379  |
| CEU | CSH | 81411945 | 9.8604  | 13.1333 | -0.7626 |
| CEU | CSH | 81416945 | 7.3552  | 10.7454 | -0.9542 |
| CEU | CSH | 81421945 | 14.9167 | 13.9861 | 0.2043  |
| CEU | CSH | 81426945 | 22.0802 | 19.4441 | 0.4223  |
| CEU | CSH | 81431945 | 20.0297 | 16.5446 | 0.6519  |
| CEU | CSH | 81436945 | 20.0963 | 14.1567 | 1.2889  |
| CEU | CSH | 81441945 | 19.4036 | 16.374  | 0.5723  |
| CEU | CSH | 81446945 | 15.9361 | 17.5679 | -0.2882 |
| CEU | CSH | 81451945 | 15.9524 | 16.8857 | -0.1712 |
| CEU | CSH | 81456945 | 14.9592 | 14.6684 | 0.061   |
| CEU | CSH | 81461945 | 11.3774 | 12.7922 | -0.338  |
| CEU | CSH | 81466945 | 8.9823  | 10.5749 | -0.455  |
| CEU | CSH | 81471945 | 7.9738  | 9.8926  | -0.5834 |

## 2\_TajimasD\_data

|     |     |          |         |         |         |
|-----|-----|----------|---------|---------|---------|
| CEU | CSH | 81476945 | 5.2412  | 8.3576  | -1.1078 |
| CEU | CSH | 81481945 | 5.5861  | 7.8459  | -0.8513 |
| CEU | CSH | 81486945 | 10.1909 | 11.0866 | -0.2448 |
| CEU | CSH | 81491945 | 11.6142 | 13.1333 | -0.354  |
| CEU | CSH | 81496945 | 12.6319 | 12.9627 | -0.078  |
| CEU | CSH | 81501945 | 14.258  | 13.4744 | 0.1782  |
| CEU | CSH | 81506945 | 19.2361 | 16.5446 | 0.5034  |
| CEU | CSH | 81511945 | 22.364  | 17.2268 | 0.9244  |
| CEU | CSH | 81516945 | 20.5939 | 16.7151 | 0.7184  |
| CEU | CSH | 81521945 | 14.5051 | 12.9627 | 0.3639  |
| CEU | CSH | 81526945 | 11.659  | 10.2337 | 0.4199  |
| CEU | CSH | 81531945 | 12.6312 | 10.916  | 0.4757  |
| CEU | CSH | 81536945 | 10.1334 | 9.8926  | 0.0732  |
| CEU | CSH | 81541945 | 11.0169 | 12.2805 | -0.3137 |
| CEU | CSH | 81546945 | 13.7044 | 13.645  | 0.0133  |
| CEU | CSH | 81551945 | 11.0425 | 10.916  | 0.0351  |
| CEU | CSH | 81556945 | 9.8081  | 11.7688 | -0.5067 |
| CEU | CSH | 81561945 | 13.2171 | 13.645  | -0.0962 |
| CEU | CSH | 81566945 | 13.2991 | 12.4511 | 0.2078  |
| CEU | CSH | 81571945 | 12.187  | 11.0866 | 0.3008  |
| CEU | CSH | 81576945 | 11.5885 | 10.4043 | 0.3435  |
| CEU | CSH | 81581945 | 9.8858  | 10.5749 | -0.1969 |
| CEU | CSH | 81586945 | 16.9411 | 15.3506 | 0.3196  |
| CHB | CSH | 80586945 | 7.087   | 13.5532 | -1.4583 |
| CHB | CSH | 80591945 | 4.8488  | 15.4168 | -2.1085 |
| CHB | CSH | 80596945 | 6.4533  | 16.2638 | -1.8599 |
| CHB | CSH | 80601945 | 4.9825  | 11.3508 | -1.6978 |
| CHB | CSH | 80606945 | 4.0781  | 10.3343 | -1.8211 |
| CHB | CSH | 80611945 | 6.1132  | 13.7226 | -1.696  |
| CHB | CSH | 80616945 | 6.8526  | 13.3838 | -1.4906 |
| CHB | CSH | 80621945 | 8.462   | 13.892  | -1.1962 |
| CHB | CSH | 80626945 | 7.0855  | 13.045  | -1.3935 |
| CHB | CSH | 80631945 | 6.416   | 11.1814 | -1.2885 |
| CHB | CSH | 80636945 | 12.6469 | 16.0944 | -0.6602 |
| CHB | CSH | 80641945 | 13.0809 | 15.7556 | -0.5227 |
| CHB | CSH | 80646945 | 9.0883  | 13.3838 | -0.9803 |
| CHB | CSH | 80651945 | 11.6398 | 14.5697 | -0.6169 |
| CHB | CSH | 80656945 | 14.5184 | 15.4168 | -0.1792 |
| CHB | CSH | 80661945 | 14.759  | 22.3628 | -1.0613 |
| CHB | CSH | 80666945 | 19.8142 | 33.883  | -1.3107 |
| CHB | CSH | 80671945 | 18.4837 | 34.3913 | -1.4606 |
| CHB | CSH | 80676945 | 13.5244 | 20.6686 | -1.0759 |
| CHB | CSH | 80681945 | 12.0469 | 13.5532 | -0.3397 |
| CHB | CSH | 80686945 | 10.6665 | 17.2803 | -1.1832 |
| CHB | CSH | 80691945 | 11.2715 | 18.2968 | -1.1897 |
| CHB | CSH | 80696945 | 11.4101 | 14.7391 | -0.6933 |
| CHB | CSH | 80701945 | 16.438  | 14.4003 | 0.4338  |
| CHB | CSH | 80706945 | 15.8072 | 17.4498 | -0.2911 |
| CHB | CSH | 80711945 | 11.2859 | 17.1109 | -1.052  |

## 2\_TajimasD\_data

|     |     |          |         |         |         |
|-----|-----|----------|---------|---------|---------|
| CHB | CSH | 80716945 | 11.526  | 16.7721 | -0.9657 |
| CHB | CSH | 80721945 | 10.5339 | 16.2638 | -1.0863 |
| CHB | CSH | 80726945 | 10.0658 | 13.3838 | -0.7572 |
| CHB | CSH | 80731945 | 10.5128 | 13.045  | -0.5921 |
| CHB | CSH | 80736945 | 8.7065  | 12.0285 | -0.8386 |
| CHB | CSH | 80741945 | 11.3021 | 12.7061 | -0.3366 |
| CHB | CSH | 80746945 | 10.6103 | 13.3838 | -0.633  |
| CHB | CSH | 80751945 | 7.6202  | 11.3508 | -0.9946 |
| CHB | CSH | 80756945 | 9.9375  | 11.8591 | -0.4916 |
| CHB | CSH | 80761945 | 14.7016 | 15.2474 | -0.1101 |
| CHB | CSH | 80766945 | 14.5365 | 14.4003 | 0.029   |
| CHB | CSH | 80771945 | 10.1966 | 13.7226 | -0.7859 |
| CHB | CSH | 80776945 | 10.2852 | 12.5367 | -0.5466 |
| CHB | CSH | 80781945 | 11.5399 | 12.3673 | -0.2035 |
| CHB | CSH | 80786945 | 10.8405 | 14.2309 | -0.73   |
| CHB | CSH | 80791945 | 9.1885  | 14.4003 | -1.1096 |
| CHB | CSH | 80796945 | 8.9376  | 14.5697 | -1.1858 |
| CHB | CSH | 80801945 | 6.6158  | 12.5367 | -1.4375 |
| CHB | CSH | 80806945 | 6.1989  | 13.2144 | -1.6205 |
| CHB | CSH | 80811945 | 7.7932  | 14.5697 | -1.4268 |
| CHB | CSH | 80816945 | 8.453   | 14.5697 | -1.2879 |
| CHB | CSH | 80821945 | 6.6766  | 12.5367 | -1.4227 |
| CHB | CSH | 80826945 | 3.7472  | 9.8261  | -1.8547 |
| CHB | CSH | 80831945 | 4.4569  | 9.8261  | -1.6381 |
| CHB | CSH | 80836945 | 7.4634  | 10.1649 | -0.7986 |
| CHB | CSH | 80841945 | 11.0234 | 10.3343 | 0.2006  |
| CHB | CSH | 80846945 | 10.1302 | 11.3508 | -0.3254 |
| CHB | CSH | 80851945 | 7.0238  | 10.6731 | -1.0307 |
| CHB | CSH | 80856945 | 4.5201  | 7.9625  | -1.2756 |
| CHB | CSH | 80861945 | 4.9336  | 9.4872  | -1.4354 |
| CHB | CSH | 80866945 | 7.1631  | 11.1814 | -1.0865 |
| CHB | CSH | 80871945 | 5.9387  | 8.3013  | -0.8426 |
| CHB | CSH | 80876945 | 5.1982  | 8.3013  | -1.1067 |
| CHB | CSH | 80881945 | 7.9842  | 12.0285 | -1.021  |
| CHB | CSH | 80886945 | 12.2758 | 13.892  | -0.356  |
| CHB | CSH | 80891945 | 23.4191 | 17.4498 | 1.058   |
| CHB | CSH | 80896945 | 31.6222 | 20.6686 | 1.6497  |
| CHB | CSH | 80901945 | 25.5662 | 18.4662 | 1.1918  |
| CHB | CSH | 80906945 | 17.8051 | 16.9415 | 0.1575  |
| CHB | CSH | 80911945 | 15.2835 | 16.0944 | -0.1553 |
| CHB | CSH | 80916945 | 13.415  | 12.7061 | 0.1699  |
| CHB | CSH | 80921945 | 14.8799 | 12.5367 | 0.5689  |
| CHB | CSH | 80926945 | 17.8806 | 17.2803 | 0.1074  |
| CHB | CSH | 80931945 | 21.5622 | 21.1769 | 0.0567  |
| CHB | CSH | 80936945 | 22.435  | 19.3133 | 0.5019  |
| CHB | CSH | 80941945 | 13.8761 | 14.4003 | -0.1116 |
| CHB | CSH | 80946945 | 11.3828 | 14.7391 | -0.6989 |
| CHB | CSH | 80951945 | 15.3626 | 16.9415 | -0.2879 |
| CHB | CSH | 80956945 | 15.3815 | 16.4333 | -0.1974 |

## 2\_TajimasD\_data

|     |     |          |         |         |         |
|-----|-----|----------|---------|---------|---------|
| CHB | CSH | 80961945 | 16.6104 | 15.0779 | 0.3123  |
| CHB | CSH | 80966945 | 20.188  | 16.4333 | 0.7048  |
| CHB | CSH | 80971945 | 15.1957 | 16.4333 | -0.2323 |
| CHB | CSH | 80976945 | 10.4415 | 14.0615 | -0.7884 |
| CHB | CSH | 80981945 | 14.8152 | 15.7556 | -0.1838 |
| CHB | CSH | 80986945 | 26.5561 | 22.1934 | 0.6134  |
| CHB | CSH | 80991945 | 28.9468 | 25.4123 | 0.4358  |
| CHB | CSH | 80996945 | 26.4749 | 23.8875 | 0.3388  |
| CHB | CSH | 81001945 | 29.2215 | 21.3463 | 1.1497  |
| CHB | CSH | 81006945 | 20.4169 | 15.4168 | 0.9976  |
| CHB | CSH | 81011945 | 12.5328 | 14.0615 | -0.3329 |
| CHB | CSH | 81016945 | 14.7405 | 15.4168 | -0.1349 |
| CHB | CSH | 81021945 | 29.7452 | 19.1439 | 1.7189  |
| CHB | CSH | 81026945 | 35.247  | 21.1769 | 2.0699  |
| CHB | CSH | 81031945 | 33.1755 | 21.3463 | 1.7269  |
| CHB | CSH | 81036945 | 30.4799 | 21.3463 | 1.3334  |
| CHB | CSH | 81041945 | 20.7824 | 15.925  | 0.9396  |
| CHB | CSH | 81046945 | 18.4719 | 13.7226 | 1.0585  |
| CHB | CSH | 81051945 | 15.4575 | 14.4003 | 0.2251  |
| CHB | CSH | 81056945 | 12.4671 | 13.045  | -0.1351 |
| CHB | CSH | 81061945 | 12.0521 | 12.3673 | -0.0775 |
| CHB | CSH | 81066945 | 9.8014  | 11.6896 | -0.4897 |
| CHB | CSH | 81071945 | 5.3925  | 10.3343 | -1.4385 |
| CHB | CSH | 81076945 | 6.7841  | 12.0285 | -1.3239 |
| CHB | CSH | 81081945 | 9.4163  | 13.2144 | -0.8773 |
| CHB | CSH | 81086945 | 12.904  | 17.7886 | -0.8499 |
| CHB | CSH | 81091945 | 12.8352 | 19.4827 | -1.0598 |
| CHB | CSH | 81096945 | 8.249   | 14.0615 | -1.2658 |
| CHB | CSH | 81101945 | 7.9751  | 12.3673 | -1.0801 |
| CHB | CSH | 81106945 | 10.0581 | 13.892  | -0.8446 |
| CHB | CSH | 81111945 | 23.2713 | 20.1604 | 0.4799  |
| CHB | CSH | 81116945 | 29.3718 | 28.8006 | 0.0624  |
| CHB | CSH | 81121945 | 16.5119 | 29.3088 | -1.3735 |
| CHB | CSH | 81126945 | 10.4258 | 23.5487 | -1.7422 |
| CHB | CSH | 81131945 | 8.6706  | 16.4333 | -1.4572 |
| CHB | CSH | 81136945 | 6.6077  | 12.1979 | -1.3928 |
| CHB | CSH | 81141945 | 20.0418 | 18.8051 | 0.204   |
| CHB | CSH | 81146945 | 28.9146 | 24.904  | 0.5043  |
| CHB | CSH | 81151945 | 21.3154 | 24.904  | -0.4513 |
| CHB | CSH | 81156945 | 30.1746 | 25.0734 | 0.6373  |
| CHB | CSH | 81161945 | 32.2583 | 22.024  | 1.4496  |
| CHB | CSH | 81166945 | 23.6257 | 21.8545 | 0.2528  |
| CHB | CSH | 81171945 | 27.2288 | 25.7511 | 0.1799  |
| CHB | CSH | 81176945 | 28.5291 | 25.5817 | 0.3611  |
| CHB | CSH | 81181945 | 39.6708 | 30.4947 | 0.9475  |
| CHB | CSH | 81186945 | 47.6945 | 33.0359 | 1.3999  |
| CHB | CSH | 81191945 | 31.6614 | 23.8875 | 1.0179  |
| CHB | CSH | 81196945 | 25.5487 | 23.5487 | 0.2655  |
| CHB | CSH | 81201945 | 31.574  | 27.2758 | 0.4948  |

## 2\_TajimasD\_data

|     |     |          |         |         |         |
|-----|-----|----------|---------|---------|---------|
| CHB | CSH | 81206945 | 29.9621 | 27.1064 | 0.3307  |
| CHB | CSH | 81211945 | 19.8353 | 22.871  | -0.4146 |
| CHB | CSH | 81216945 | 9.0402  | 19.3133 | -1.6516 |
| CHB | CSH | 81221945 | 11.0152 | 18.9745 | -1.3016 |
| CHB | CSH | 81226945 | 12.0817 | 17.6192 | -0.9724 |
| CHB | CSH | 81231945 | 7.2707  | 14.7391 | -1.5553 |
| CHB | CSH | 81236945 | 22.3476 | 22.1934 | 0.0217  |
| CHB | CSH | 81241945 | 46.6296 | 33.3748 | 1.2532  |
| CHB | CSH | 81246945 | 41.0707 | 25.0734 | 1.9985  |
| CHB | CSH | 81251945 | 32.8003 | 18.1274 | 2.5072  |
| CHB | CSH | 81256945 | 23.3406 | 19.4827 | 0.6151  |
| CHB | CSH | 81261945 | 10.1405 | 15.925  | -1.1189 |
| CHB | CSH | 81266945 | 8.3101  | 10.6731 | -0.6674 |
| CHB | CSH | 81271945 | 10.8528 | 11.8591 | -0.2575 |
| CHB | CSH | 81276945 | 18.2583 | 17.2803 | 0.175   |
| CHB | CSH | 81281945 | 20.0508 | 17.2803 | 0.4956  |
| CHB | CSH | 81286945 | 13.799  | 12.8755 | 0.2186  |
| CHB | CSH | 81291945 | 6.9353  | 12.0285 | -1.2858 |
| CHB | CSH | 81296945 | 5.1424  | 12.7061 | -1.8132 |
| CHB | CSH | 81301945 | 8.5702  | 13.7226 | -1.1484 |
| CHB | CSH | 81306945 | 10.2821 | 13.045  | -0.6461 |
| CHB | CSH | 81311945 | 6.846   | 9.6567  | -0.8715 |
| CHB | CSH | 81316945 | 4.7669  | 9.6567  | -1.5162 |
| CHB | CSH | 81321945 | 3.6089  | 9.6567  | -1.8753 |
| CHB | CSH | 81326945 | 7.2197  | 10.1649 | -0.8706 |
| CHB | CSH | 81331945 | 8.4019  | 10.1649 | -0.5212 |
| CHB | CSH | 81336945 | 5.6168  | 9.8261  | -1.2843 |
| CHB | CSH | 81341945 | 5.2199  | 10.1649 | -1.4618 |
| CHB | CSH | 81346945 | 5.068   | 9.4872  | -1.393  |
| CHB | CSH | 81351945 | 5.7822  | 10.3343 | -1.3251 |
| CHB | CSH | 81356945 | 10.1799 | 13.3838 | -0.7312 |
| CHB | CSH | 81361945 | 14.3786 | 15.5862 | -0.2384 |
| CHB | CSH | 81366945 | 15.4864 | 16.2638 | -0.1474 |
| CHB | CSH | 81371945 | 15.7619 | 17.7886 | -0.3526 |
| CHB | CSH | 81376945 | 11.7611 | 16.2638 | -0.8536 |
| CHB | CSH | 81381945 | 10.6682 | 16.0944 | -1.0391 |
| CHB | CSH | 81386945 | 12.1009 | 17.7886 | -0.9896 |
| CHB | CSH | 81391945 | 14.9391 | 18.6357 | -0.6151 |
| CHB | CSH | 81396945 | 13.9667 | 16.0944 | -0.4074 |
| CHB | CSH | 81401945 | 11.3166 | 14.0615 | -0.5978 |
| CHB | CSH | 81406945 | 13.0272 | 17.7886 | -0.8285 |
| CHB | CSH | 81411945 | 10.9069 | 16.6027 | -1.0588 |
| CHB | CSH | 81416945 | 8.5972  | 12.8755 | -1.0129 |
| CHB | CSH | 81421945 | 11.0754 | 16.9415 | -1.0695 |
| CHB | CSH | 81426945 | 15.5518 | 20.1604 | -0.7109 |
| CHB | CSH | 81431945 | 19.8545 | 18.4662 | 0.233   |
| CHB | CSH | 81436945 | 22.3844 | 19.1439 | 0.5254  |
| CHB | CSH | 81441945 | 22.4386 | 21.0075 | 0.2122  |
| CHB | CSH | 81446945 | 18.7363 | 19.6521 | -0.1448 |



## 2\_TajimasD\_data

|     |     |          |         |         |         |
|-----|-----|----------|---------|---------|---------|
| CHB | CSH | 81451945 | 16.5728 | 18.8051 | -0.3682 |
| CHB | CSH | 81456945 | 16.0426 | 18.1274 | -0.3562 |
| CHB | CSH | 81461945 | 12.7542 | 14.4003 | -0.3505 |
| CHB | CSH | 81466945 | 10.0527 | 11.3508 | -0.3461 |
| CHB | CSH | 81471945 | 8.9914  | 11.012  | -0.5542 |
| CHB | CSH | 81476945 | 7.4736  | 9.3178  | -0.5911 |
| CHB | CSH | 81481945 | 7.3531  | 9.8261  | -0.7545 |
| CHB | CSH | 81486945 | 12.4091 | 14.9085 | -0.5149 |
| CHB | CSH | 81491945 | 14.3872 | 16.6027 | -0.4118 |
| CHB | CSH | 81496945 | 15.5385 | 16.2638 | -0.1375 |
| CHB | CSH | 81501945 | 16.8401 | 15.2474 | 0.3211  |
| CHB | CSH | 81506945 | 19.2632 | 17.4498 | 0.3214  |
| CHB | CSH | 81511945 | 18.847  | 18.2968 | 0.0932  |
| CHB | CSH | 81516945 | 14.2098 | 14.9085 | -0.1439 |
| CHB | CSH | 81521945 | 10.142  | 11.012  | -0.2386 |
| CHB | CSH | 81526945 | 10.6217 | 11.012  | -0.1071 |
| CHB | CSH | 81531945 | 11.7986 | 11.1814 | 0.1669  |
| CHB | CSH | 81536945 | 10.1289 | 10.8426 | -0.1986 |
| CHB | CSH | 81541945 | 9.9874  | 12.5367 | -0.6189 |
| CHB | CSH | 81546945 | 10.8538 | 12.5367 | -0.4086 |
| CHB | CSH | 81551945 | 11.071  | 12.5367 | -0.3558 |
| CHB | CSH | 81556945 | 12.0346 | 13.7226 | -0.3762 |
| CHB | CSH | 81561945 | 13.4611 | 14.0615 | -0.1308 |
| CHB | CSH | 81566945 | 12.9549 | 12.7061 | 0.0596  |
| CHB | CSH | 81571945 | 12.0851 | 12.3673 | -0.0694 |
| CHB | CSH | 81576945 | 10.6524 | 13.5532 | -0.6542 |
| CHB | CSH | 81581945 | 8.6465  | 13.2144 | -1.0552 |
| CHB | CSH | 81586945 | 16.9518 | 16.7721 | 0.0331  |
| YRI | CSH | 80586945 | 17.7652 | 19.3272 | -0.2501 |
| YRI | CSH | 80591945 | 16.6449 | 20.8397 | -0.6246 |
| YRI | CSH | 80596945 | 16.1466 | 22.6884 | -0.8973 |
| YRI | CSH | 80601945 | 15.1322 | 21.0078 | -0.8682 |
| YRI | CSH | 80606945 | 16.1631 | 21.0078 | -0.7158 |
| YRI | CSH | 80611945 | 16.7757 | 19.9994 | -0.4995 |
| YRI | CSH | 80616945 | 18.5138 | 18.1507 | 0.0618  |
| YRI | CSH | 80621945 | 21.0887 | 19.6633 | 0.2245  |
| YRI | CSH | 80626945 | 16.1844 | 17.1423 | -0.1721 |
| YRI | CSH | 80631945 | 12.9948 | 15.9659 | -0.5714 |
| YRI | CSH | 80636945 | 23.1102 | 23.8648 | -0.0986 |
| YRI | CSH | 80641945 | 23.0168 | 25.0413 | -0.2524 |
| YRI | CSH | 80646945 | 19.7718 | 22.0162 | -0.3169 |
| YRI | CSH | 80651945 | 19.2651 | 21.68   | -0.3461 |
| YRI | CSH | 80656945 | 20.4998 | 22.1842 | -0.2361 |
| YRI | CSH | 80661945 | 36.4306 | 28.4025 | 0.8855  |
| YRI | CSH | 80666945 | 55.6888 | 40.6711 | 1.166   |
| YRI | CSH | 80671945 | 51.2739 | 43.192  | 0.5915  |
| YRI | CSH | 80676945 | 27.6908 | 28.9067 | -0.1318 |
| YRI | CSH | 80681945 | 13.7961 | 20.1675 | -0.9792 |
| YRI | CSH | 80686945 | 15.1211 | 23.1926 | -1.0839 |

## 2\_TajimasD\_data

|     |     |          |         |         |         |
|-----|-----|----------|---------|---------|---------|
| YRI | CSH | 80691945 | 17.4303 | 25.8816 | -1.0203 |
| YRI | CSH | 80696945 | 14.8759 | 24.0329 | -1.1879 |
| YRI | CSH | 80701945 | 17.491  | 24.5371 | -0.8959 |
| YRI | CSH | 80706945 | 18.1863 | 25.2093 | -0.8698 |
| YRI | CSH | 80711945 | 15.8122 | 21.8481 | -0.8587 |
| YRI | CSH | 80716945 | 14.9556 | 20.1675 | -0.801  |
| YRI | CSH | 80721945 | 14.571  | 23.0245 | -1.1432 |
| YRI | CSH | 80726945 | 14.1362 | 23.8648 | -1.2707 |
| YRI | CSH | 80731945 | 13.7214 | 21.0078 | -1.0766 |
| YRI | CSH | 80736945 | 12.0915 | 20.1675 | -1.2412 |
| YRI | CSH | 80741945 | 12.8666 | 23.3606 | -1.3993 |
| YRI | CSH | 80746945 | 11.7153 | 23.3606 | -1.5529 |
| YRI | CSH | 80751945 | 8.5826  | 20.3355 | -1.7919 |
| YRI | CSH | 80756945 | 11.7603 | 20.5036 | -1.3225 |
| YRI | CSH | 80761945 | 16.7045 | 24.5371 | -0.9959 |
| YRI | CSH | 80766945 | 14.9881 | 23.1926 | -1.1017 |
| YRI | CSH | 80771945 | 13.3591 | 23.6968 | -1.3595 |
| YRI | CSH | 80776945 | 15.0347 | 23.8648 | -1.1534 |
| YRI | CSH | 80781945 | 14.8358 | 19.4952 | -0.7399 |
| YRI | CSH | 80786945 | 15.8127 | 18.991  | -0.5176 |
| YRI | CSH | 80791945 | 16.0183 | 22.3523 | -0.8815 |
| YRI | CSH | 80796945 | 14.8076 | 23.3606 | -1.1405 |
| YRI | CSH | 80801945 | 12.8728 | 21.8481 | -1.2769 |
| YRI | CSH | 80806945 | 12.7162 | 20.8397 | -1.2097 |
| YRI | CSH | 80811945 | 14.9895 | 20.6717 | -0.8528 |
| YRI | CSH | 80816945 | 14.5085 | 22.6884 | -1.122  |
| YRI | CSH | 80821945 | 10.7267 | 21.1758 | -1.5321 |
| YRI | CSH | 80826945 | 8.5949  | 17.4785 | -1.5667 |
| YRI | CSH | 80831945 | 9.0607  | 13.445  | -0.9929 |
| YRI | CSH | 80836945 | 11.086  | 11.7644 | -0.1743 |
| YRI | CSH | 80841945 | 16.7337 | 13.9492 | 0.609   |
| YRI | CSH | 80846945 | 18.0423 | 17.4785 | 0.0994  |
| YRI | CSH | 80851945 | 13.9079 | 18.1507 | -0.7216 |
| YRI | CSH | 80856945 | 12.2253 | 18.3188 | -1.0273 |
| YRI | CSH | 80861945 | 13.4682 | 19.9994 | -1.0119 |
| YRI | CSH | 80866945 | 12.8822 | 19.6633 | -1.0679 |
| YRI | CSH | 80871945 | 10.9016 | 16.4701 | -1.0395 |
| YRI | CSH | 80876945 | 10.5575 | 16.302  | -1.083  |
| YRI | CSH | 80881945 | 11.7623 | 16.8062 | -0.9236 |
| YRI | CSH | 80886945 | 14.6899 | 17.8146 | -0.5411 |
| YRI | CSH | 80891945 | 27.4075 | 24.7051 | 0.3413  |
| YRI | CSH | 80896945 | 33.7282 | 26.7219 | 0.82    |
| YRI | CSH | 80901945 | 26.0154 | 24.8732 | 0.1433  |
| YRI | CSH | 80906945 | 21.0231 | 23.3606 | -0.3117 |
| YRI | CSH | 80911945 | 20.4303 | 23.0245 | -0.3508 |
| YRI | CSH | 80916945 | 25.3654 | 27.3941 | -0.2318 |
| YRI | CSH | 80921945 | 26.3486 | 27.058  | -0.082  |
| YRI | CSH | 80926945 | 22.035  | 25.0413 | -0.3748 |
| YRI | CSH | 80931945 | 22.6293 | 27.5622 | -0.5602 |

## 2\_TajimasD\_data

|     |     |          |         |         |         |
|-----|-----|----------|---------|---------|---------|
| YRI | CSH | 80936945 | 21.9952 | 27.058  | -0.5854 |
| YRI | CSH | 80941945 | 15.649  | 21.8481 | -0.8819 |
| YRI | CSH | 80946945 | 16.0884 | 21.68   | -0.8015 |
| YRI | CSH | 80951945 | 22.5629 | 26.0496 | -0.4183 |
| YRI | CSH | 80956945 | 19.272  | 23.8648 | -0.5999 |
| YRI | CSH | 80961945 | 15.5834 | 20.5036 | -0.7442 |
| YRI | CSH | 80966945 | 17.2582 | 20.1675 | -0.4471 |
| YRI | CSH | 80971945 | 14.3602 | 18.1507 | -0.6447 |
| YRI | CSH | 80976945 | 16.0993 | 15.7978 | 0.0586  |
| YRI | CSH | 80981945 | 25.9236 | 17.8146 | 1.4042  |
| YRI | CSH | 80986945 | 43.0054 | 24.7051 | 2.3114  |
| YRI | CSH | 80991945 | 46.142  | 26.0496 | 2.4105  |
| YRI | CSH | 80996945 | 42.6103 | 27.5622 | 1.709   |
| YRI | CSH | 81001945 | 43.1585 | 26.3858 | 1.9874  |
| YRI | CSH | 81006945 | 26.3834 | 22.0162 | 0.6167  |
| YRI | CSH | 81011945 | 14.8222 | 25.8816 | -1.3352 |
| YRI | CSH | 81016945 | 19.0888 | 25.2093 | -0.7581 |
| YRI | CSH | 81021945 | 33.0876 | 24.7051 | 1.0588  |
| YRI | CSH | 81026945 | 37.4259 | 26.0496 | 1.3648  |
| YRI | CSH | 81031945 | 36.1353 | 27.3941 | 0.9986  |
| YRI | CSH | 81036945 | 33.4425 | 28.5706 | 0.5343  |
| YRI | CSH | 81041945 | 20.9828 | 24.369  | -0.4334 |
| YRI | CSH | 81046945 | 17.9686 | 23.0245 | -0.6837 |
| YRI | CSH | 81051945 | 16.8243 | 19.9994 | -0.4919 |
| YRI | CSH | 81056945 | 15.9894 | 16.302  | -0.0589 |
| YRI | CSH | 81061945 | 16.1871 | 17.9827 | -0.3081 |
| YRI | CSH | 81066945 | 13.6816 | 17.8146 | -0.7157 |
| YRI | CSH | 81071945 | 10.4289 | 15.2937 | -0.9748 |
| YRI | CSH | 81076945 | 11.5916 | 15.6298 | -0.7925 |
| YRI | CSH | 81081945 | 14.0229 | 18.3188 | -0.7242 |
| YRI | CSH | 81086945 | 22.6615 | 23.1926 | -0.0713 |
| YRI | CSH | 81091945 | 24.3989 | 26.3858 | -0.2354 |
| YRI | CSH | 81096945 | 16.7067 | 23.3606 | -0.8873 |
| YRI | CSH | 81101945 | 14.3042 | 20.5036 | -0.9377 |
| YRI | CSH | 81106945 | 13.4535 | 20.1675 | -1.0319 |
| YRI | CSH | 81111945 | 24.8088 | 25.5455 | -0.0901 |
| YRI | CSH | 81116945 | 36.1364 | 35.125  | 0.0907  |
| YRI | CSH | 81121945 | 31.7044 | 35.7973 | -0.3601 |
| YRI | CSH | 81126945 | 24.6886 | 30.5873 | -0.6053 |
| YRI | CSH | 81131945 | 16.1253 | 22.6884 | -0.9003 |
| YRI | CSH | 81136945 | 11.9896 | 20.1675 | -1.2569 |
| YRI | CSH | 81141945 | 28.2441 | 29.9151 | -0.1752 |
| YRI | CSH | 81146945 | 36.918  | 33.9486 | 0.2752  |
| YRI | CSH | 81151945 | 27.7604 | 31.0915 | -0.3364 |
| YRI | CSH | 81156945 | 28.607  | 33.2763 | -0.4413 |
| YRI | CSH | 81161945 | 28.773  | 30.9234 | -0.2183 |
| YRI | CSH | 81166945 | 29.7801 | 31.7638 | -0.1962 |
| YRI | CSH | 81171945 | 33.1436 | 34.6208 | -0.1343 |
| YRI | CSH | 81176945 | 28.9694 | 32.0999 | -0.3064 |

## 2\_TajimasD\_data

|     |     |          |         |         |         |
|-----|-----|----------|---------|---------|---------|
| YRI | CSH | 81181945 | 36.3696 | 35.2931 | 0.096   |
| YRI | CSH | 81186945 | 45.4169 | 38.9904 | 0.5201  |
| YRI | CSH | 81191945 | 35.2463 | 35.6292 | -0.0338 |
| YRI | CSH | 81196945 | 35.3927 | 35.125  | 0.024   |
| YRI | CSH | 81201945 | 46.3088 | 35.6292 | 0.944   |
| YRI | CSH | 81206945 | 44.9518 | 36.6376 | 0.7151  |
| YRI | CSH | 81211945 | 37.2681 | 38.6543 | -0.1131 |
| YRI | CSH | 81216945 | 26.5874 | 34.6208 | -0.7304 |
| YRI | CSH | 81221945 | 21.2554 | 28.4025 | -0.7883 |
| YRI | CSH | 81226945 | 19.1855 | 24.5371 | -0.6804 |
| YRI | CSH | 81231945 | 17.9224 | 25.7135 | -0.9466 |
| YRI | CSH | 81236945 | 39.6734 | 35.4611 | 0.3741  |
| YRI | CSH | 81241945 | 64.3214 | 43.8642 | 1.4747  |
| YRI | CSH | 81246945 | 54.1986 | 37.6459 | 1.3864  |
| YRI | CSH | 81251945 | 42.8976 | 30.7554 | 1.2393  |
| YRI | CSH | 81256945 | 36.5715 | 27.2261 | 1.0741  |
| YRI | CSH | 81261945 | 24.2355 | 23.1926 | 0.14    |
| YRI | CSH | 81266945 | 15.7598 | 18.3188 | -0.4314 |
| YRI | CSH | 81271945 | 17.6864 | 18.1507 | -0.079  |
| YRI | CSH | 81276945 | 26.5173 | 23.1926 | 0.4464  |
| YRI | CSH | 81281945 | 29.0438 | 24.5371 | 0.573   |
| YRI | CSH | 81286945 | 23.3353 | 21.8481 | 0.2116  |
| YRI | CSH | 81291945 | 15.4937 | 20.5036 | -0.7578 |
| YRI | CSH | 81296945 | 14.4566 | 18.6549 | -0.6955 |
| YRI | CSH | 81301945 | 15.4916 | 17.3104 | -0.3237 |
| YRI | CSH | 81306945 | 14.2878 | 18.3188 | -0.6796 |
| YRI | CSH | 81311945 | 11.0245 | 15.6298 | -0.9038 |
| YRI | CSH | 81316945 | 9.2673  | 13.613  | -0.9727 |
| YRI | CSH | 81321945 | 7.2751  | 13.445  | -1.3973 |
| YRI | CSH | 81326945 | 7.9739  | 13.9492 | -1.3068 |
| YRI | CSH | 81331945 | 9.6695  | 14.7895 | -1.0592 |
| YRI | CSH | 81336945 | 8.0537  | 13.7811 | -1.2671 |
| YRI | CSH | 81341945 | 8.2324  | 13.445  | -1.1805 |
| YRI | CSH | 81346945 | 9.3512  | 15.9659 | -1.2721 |
| YRI | CSH | 81351945 | 10.2542 | 17.8146 | -1.3092 |
| YRI | CSH | 81356945 | 14.5523 | 21.3439 | -0.9883 |
| YRI | CSH | 81361945 | 18.4675 | 22.5203 | -0.5599 |
| YRI | CSH | 81366945 | 18.2798 | 21.8481 | -0.5076 |
| YRI | CSH | 81371945 | 18.1141 | 23.1926 | -0.6819 |
| YRI | CSH | 81376945 | 13.0866 | 19.4952 | -1.0176 |
| YRI | CSH | 81381945 | 11.966  | 18.823  | -1.1262 |
| YRI | CSH | 81386945 | 14.7738 | 22.5203 | -1.0702 |
| YRI | CSH | 81391945 | 16.5447 | 25.2093 | -1.0731 |
| YRI | CSH | 81396945 | 18.4724 | 25.5455 | -0.8648 |
| YRI | CSH | 81401945 | 16.1462 | 24.369  | -1.0525 |
| YRI | CSH | 81406945 | 17.2485 | 26.3858 | -1.0827 |
| YRI | CSH | 81411945 | 16.0876 | 22.5203 | -0.8887 |
| YRI | CSH | 81416945 | 13.0645 | 18.823  | -0.9458 |
| YRI | CSH | 81421945 | 18.8493 | 23.1926 | -0.5832 |

## 2\_TajimasD\_data

|     |     |          |         |         |         |
|-----|-----|----------|---------|---------|---------|
| YRI | CSH | 81426945 | 22.5929 | 24.5371 | -0.2472 |
| YRI | CSH | 81431945 | 23.3272 | 23.0245 | 0.0409  |
| YRI | CSH | 81436945 | 24.3232 | 24.5371 | -0.0272 |
| YRI | CSH | 81441945 | 27.385  | 28.5706 | -0.13   |
| YRI | CSH | 81446945 | 24.725  | 26.2177 | -0.178  |
| YRI | CSH | 81451945 | 20.7997 | 24.0329 | -0.4194 |
| YRI | CSH | 81456945 | 19.2548 | 22.1842 | -0.4107 |
| YRI | CSH | 81461945 | 13.0221 | 19.8313 | -1.0636 |
| YRI | CSH | 81466945 | 11.4215 | 19.4952 | -1.282  |
| YRI | CSH | 81471945 | 12.0793 | 17.8146 | -0.9931 |
| YRI | CSH | 81476945 | 9.99    | 15.4617 | -1.085  |
| YRI | CSH | 81481945 | 9.0089  | 12.7727 | -0.8948 |
| YRI | CSH | 81486945 | 11.0214 | 17.9827 | -1.1946 |
| YRI | CSH | 81491945 | 11.7802 | 21.68   | -1.419  |
| YRI | CSH | 81496945 | 12.7527 | 21.3439 | -1.2501 |
| YRI | CSH | 81501945 | 13.7705 | 21.68   | -1.1337 |
| YRI | CSH | 81506945 | 20.1014 | 24.5371 | -0.564  |
| YRI | CSH | 81511945 | 21.7059 | 24.369  | -0.3409 |
| YRI | CSH | 81516945 | 17.2418 | 22.0162 | -0.6742 |
| YRI | CSH | 81521945 | 12.8925 | 18.823  | -0.9741 |
| YRI | CSH | 81526945 | 13.4496 | 17.6465 | -0.7334 |
| YRI | CSH | 81531945 | 14.2259 | 17.8146 | -0.6214 |
| YRI | CSH | 81536945 | 11.5829 | 16.302  | -0.8897 |
| YRI | CSH | 81541945 | 13.2221 | 17.8146 | -0.7953 |
| YRI | CSH | 81546945 | 12.3123 | 19.4952 | -1.1406 |
| YRI | CSH | 81551945 | 11.5477 | 18.4868 | -1.1596 |
| YRI | CSH | 81556945 | 12.8026 | 18.1507 | -0.9096 |
| YRI | CSH | 81561945 | 12.6477 | 19.1591 | -1.0514 |
| YRI | CSH | 81566945 | 11.9607 | 16.4701 | -0.8418 |
| YRI | CSH | 81571945 | 13.7137 | 16.4701 | -0.5146 |
| YRI | CSH | 81576945 | 13.5212 | 19.8313 | -0.9856 |
| YRI | CSH | 81581945 | 10.9367 | 19.9994 | -1.4041 |
| YRI | CSH | 81586945 | 19.9545 | 23.6968 | -0.4922 |
| CEU | CSH | 17832873 | 7.3686  | 6.4814  | 0.3977  |
| CEU | CSH | 17837873 | 4.6994  | 4.2641  | 0.2826  |
| CEU | CSH | 17842873 | 4.7669  | 4.9463  | -0.1023 |
| CEU | CSH | 17847873 | 8.1705  | 6.4814  | 0.7571  |
| CEU | CSH | 17852873 | 9.6425  | 7.5047  | 0.8388  |
| CEU | CSH | 17857873 | 7.0738  | 7.1636  | -0.0368 |
| CEU | CSH | 17862873 | 6.3393  | 6.1402  | 0.0937  |
| CEU | CSH | 17867873 | 7.053   | 6.3108  | 0.3408  |
| CEU | CSH | 17872873 | 8.2248  | 6.8225  | 0.6     |
| CEU | CSH | 17877873 | 7.5099  | 6.3108  | 0.5505  |
| CEU | CSH | 17882873 | 6.167   | 5.6286  | 0.2739  |
| CEU | CSH | 17887873 | 4.0491  | 3.4112  | 0.501   |
| CEU | CSH | 17892873 | 3.9262  | 3.9229  | 0.0023  |
| CEU | CSH | 17897873 | 5.8456  | 5.9697  | -0.0599 |
| CEU | CSH | 17902873 | 7.1439  | 7.8459  | -0.2645 |
| CEU | CSH | 17907873 | 6.0606  | 7.5047  | -0.5666 |

## 2\_TajimasD\_data

|     |     |          |         |         |         |
|-----|-----|----------|---------|---------|---------|
| CEU | CSH | 17912873 | 3.7333  | 4.6052  | -0.5294 |
| CEU | CSH | 17917873 | 3.6887  | 5.6286  | -0.9868 |
| CEU | CSH | 17922873 | 3.4603  | 5.6286  | -1.1029 |
| CEU | CSH | 17927873 | 3.1835  | 4.0935  | -0.6119 |
| CEU | CSH | 17932873 | 2.6722  | 3.2407  | -0.4662 |
| CEU | CSH | 17937873 | 3.7186  | 3.0701  | 0.5563  |
| CEU | CSH | 17942873 | 5.1983  | 3.7524  | 1.0475  |
| CEU | CSH | 17947873 | 7.9951  | 5.7991  | 1.0877  |
| CEU | CSH | 17952873 | 9.8233  | 7.1636  | 1.0887  |
| CEU | CSH | 17957873 | 7.269   | 5.7991  | 0.728   |
| CEU | CSH | 17962873 | 6.0202  | 5.9697  | 0.0244  |
| CEU | CSH | 17967873 | 5.4826  | 5.9697  | -0.2351 |
| CEU | CSH | 17972873 | 7.4486  | 7.6753  | -0.0871 |
| CEU | CSH | 17977873 | 9.1358  | 8.3576  | 0.2766  |
| CEU | CSH | 17982873 | 7.6842  | 5.7991  | 0.9337  |
| CEU | CSH | 17987873 | 9.1567  | 5.7991  | 1.663   |
| CEU | CSH | 17992873 | 8.5624  | 6.4814  | 0.9327  |
| CEU | CSH | 17997873 | 4.2612  | 5.7991  | -0.7617 |
| CEU | CSH | 18002873 | 4.3781  | 4.9463  | -0.324  |
| CEU | CSH | 18007873 | 7.9503  | 5.9697  | 0.9559  |
| CEU | CSH | 18012873 | 7.9336  | 7.8459  | 0.033   |
| CEU | CSH | 18017873 | 7.5976  | 7.5047  | 0.0364  |
| CEU | CSH | 18022873 | 7.5461  | 5.9697  | 0.7608  |
| CEU | CSH | 18027873 | 7.1375  | 5.9697  | 0.5636  |
| CEU | CSH | 18032873 | 5.2226  | 4.7757  | 0.2628  |
| CEU | CSH | 18037873 | 4.0282  | 4.7757  | -0.4396 |
| CEU | CSH | 18042873 | 8.6768  | 7.8459  | 0.313   |
| CEU | CSH | 18047873 | 7.4682  | 6.8225  | 0.2763  |
| CEU | CSH | 18052873 | 5.2847  | 5.1169  | 0.0929  |
| CEU | CSH | 18057873 | 6.6246  | 4.7757  | 1.0874  |
| CEU | CSH | 18062873 | 7.3741  | 5.6286  | 0.8879  |
| CEU | CSH | 18067873 | 10.2045 | 8.6987  | 0.5159  |
| CEU | CSH | 18072873 | 9.8231  | 9.3809  | 0.1413  |
| CEU | CSH | 18077873 | 7.778   | 7.1636  | 0.2515  |
| CEU | CSH | 18082873 | 5.7763  | 4.7757  | 0.5885  |
| CEU | CSH | 18087873 | 6.0336  | 7.3342  | -0.5211 |
| CEU | CSH | 18092873 | 8.3892  | 9.7221  | -0.4119 |
| CEU | CSH | 18097873 | 7.7079  | 8.0164  | -0.1139 |
| CEU | CSH | 18102873 | 10.6813 | 8.6987  | 0.6792  |
| CEU | CSH | 18107873 | 14.3709 | 10.4043 | 1.1507  |
| CEU | CSH | 18112873 | 11.9256 | 10.2337 | 0.4984  |
| CEU | CSH | 18117873 | 8.2224  | 9.2104  | -0.321  |
| CEU | CSH | 18122873 | 8.9738  | 9.3809  | -0.1301 |
| CEU | CSH | 18127873 | 11.9946 | 10.2337 | 0.5188  |
| CEU | CSH | 18132873 | 12.4816 | 10.4043 | 0.6026  |
| CEU | CSH | 18137873 | 9.7811  | 10.2337 | -0.1333 |
| CEU | CSH | 18142873 | 6.5234  | 9.3809  | -0.9129 |
| CEU | CSH | 18147873 | 5.5609  | 8.3576  | -0.9941 |
| CEU | CSH | 18152873 | 6.1099  | 6.8225  | -0.3049 |

## 2\_TajimasD\_data

|     |     |          |         |         |         |
|-----|-----|----------|---------|---------|---------|
| CEU | CSH | 18157873 | 4.6745  | 6.1402  | -0.6897 |
| CEU | CSH | 18162873 | 4.8681  | 7.1636  | -0.9397 |
| CEU | CSH | 18167873 | 7.168   | 8.6987  | -0.5244 |
| CEU | CSH | 18172873 | 8.2707  | 9.7221  | -0.4485 |
| CEU | CSH | 18177873 | 8.5834  | 9.7221  | -0.3519 |
| CEU | CSH | 18182873 | 8.3836  | 9.5515  | -0.3669 |
| CEU | CSH | 18187873 | 11.107  | 9.7221  | 0.428   |
| CEU | CSH | 18192873 | 9.8707  | 8.3576  | 0.5379  |
| CEU | CSH | 18197873 | 9.7489  | 8.5281  | 0.426   |
| CEU | CSH | 18202873 | 8.1055  | 8.187   | -0.0295 |
| CEU | CSH | 18207873 | 8.7223  | 8.6987  | 0.0081  |
| CEU | CSH | 18212873 | 12.2791 | 10.5749 | 0.4869  |
| CEU | CSH | 18217873 | 11.5844 | 10.0632 | 0.4552  |
| CEU | CSH | 18222873 | 14.9608 | 10.916  | 1.1218  |
| CEU | CSH | 18227873 | 12.5925 | 9.0398  | 1.1746  |
| CEU | CSH | 18232873 | 6.3655  | 6.6519  | -0.1254 |
| CEU | CSH | 18237873 | 7.7112  | 8.5281  | -0.285  |
| CEU | CSH | 18242873 | 10.0992 | 8.8692  | 0.4139  |
| CEU | CSH | 18247873 | 8.9384  | 8.3576  | 0.2065  |
| CEU | CSH | 18252873 | 14.0113 | 12.1099 | 0.4783  |
| CEU | CSH | 18257873 | 16.2043 | 12.7922 | 0.8151  |
| CEU | CSH | 18262873 | 12.524  | 10.0632 | 0.7364  |
| CEU | CSH | 18267873 | 15.4534 | 11.2571 | 1.1307  |
| CEU | CSH | 18272873 | 11.9618 | 9.5515  | 0.7572  |
| CEU | CSH | 18277873 | 5.1841  | 6.1402  | -0.4499 |
| CEU | CSH | 18282873 | 4.8767  | 6.8225  | -0.8326 |
| CEU | CSH | 18287873 | 25.8551 | 13.3039 | 2.8891  |
| CEU | CSH | 18292873 | 35.6059 | 15.0095 | 4.2277  |
| CEU | CSH | 18297873 | 16.3232 | 8.8692  | 2.5083  |
| CEU | CSH | 18302873 | 9.0355  | 7.5047  | 0.6006  |
| CEU | CSH | 18307873 | 7.6001  | 7.3342  | 0.1065  |
| CEU | CSH | 18312873 | 4.8668  | 5.7991  | -0.4618 |
| CEU | CSH | 18317873 | 3.86    | 5.458   | -0.8354 |
| CEU | CSH | 18322873 | 4.2228  | 5.9697  | -0.8431 |
| CEU | CSH | 18327873 | 4.1859  | 5.2874  | -0.5923 |
| CEU | CSH | 18332873 | 3.2105  | 3.0701  | 0.1204  |
| CEU | CSH | 18337873 | 3.0167  | 1.5351  | 2.1969  |
| CEU | CSH | 18342873 | 4.7899  | 2.3879  | 2.5296  |
| CEU | CSH | 18347873 | 4.6976  | 4.0935  | 0.4062  |
| CEU | CSH | 18352873 | 11.3581 | 7.1636  | 1.717   |
| CEU | CSH | 18357873 | 12.8806 | 7.5047  | 2.1092  |
| CEU | CSH | 18362873 | 5.1148  | 5.458   | -0.1794 |
| CEU | CSH | 18367873 | 4.9169  | 6.1402  | -0.5757 |
| CEU | CSH | 18372873 | 2.7976  | 4.0935  | -0.8714 |
| CEU | CSH | 18377873 | 1.7666  | 3.4112  | -1.2917 |
| CEU | CSH | 18382873 | 2.6277  | 4.9463  | -1.3223 |
| CEU | CSH | 18387873 | 2.6805  | 4.4346  | -1.1006 |
| CEU | CSH | 18392873 | 5.5213  | 4.6052  | 0.5562  |
| CEU | CSH | 18397873 | 4.383   | 3.9229  | 0.3209  |

## 2\_TajimasD\_data

|     |     |          |         |         |         |
|-----|-----|----------|---------|---------|---------|
| CEU | CSH | 18402873 | 1.9105  | 2.729   | -0.7737 |
| CEU | CSH | 18407873 | 1.5265  | 2.3879  | -0.9071 |
| CEU | CSH | 18412873 | 1.6834  | 2.729   | -0.9883 |
| CEU | CSH | 18417873 | 2.73    | 3.7524  | -0.7407 |
| CEU | CSH | 18422873 | 1.9701  | 2.8996  | -0.8359 |
| CEU | CSH | 18427873 | 1.0243  | 2.2173  | -1.3328 |
| CEU | CSH | 18432873 | 0.6621  | 2.729   | -1.9537 |
| CEU | CSH | 18437873 | 0.7205  | 2.3879  | -1.7559 |
| CEU | CSH | 18442873 | 0.623   | 2.0467  | -1.694  |
| CEU | CSH | 18447873 | 0.6768  | 1.7056  | -1.4091 |
| CEU | CSH | 18452873 | 0.7238  | 1.3645  | -1.0365 |
| CEU | CSH | 18457873 | 0.3847  | 1.3645  | -1.5851 |
| CEU | CSH | 18462873 | 1.686   | 2.0467  | -0.4292 |
| CEU | CSH | 18467873 | 2.1128  | 3.9229  | -1.2625 |
| CEU | CSH | 18472873 | 2.67    | 5.458   | -1.4575 |
| CEU | CSH | 18477873 | 3.2     | 3.7524  | -0.4002 |
| CEU | CSH | 18482873 | 1.8992  | 2.2173  | -0.3554 |
| CEU | CSH | 18487873 | 2.1     | 2.3879  | -0.3032 |
| CEU | CSH | 18492873 | 3.8322  | 4.0935  | -0.1757 |
| CEU | CSH | 18497873 | 5.5799  | 5.9697  | -0.1881 |
| CEU | CSH | 18502873 | 5.6238  | 4.9463  | 0.3864  |
| CEU | CSH | 18507873 | 2.9895  | 3.2407  | -0.206  |
| CEU | CSH | 18512873 | 1.8481  | 4.2641  | -1.5683 |
| CEU | CSH | 18517873 | 2.8864  | 4.6052  | -1.0436 |
| CEU | CSH | 18522873 | 3.2746  | 4.0935  | -0.5507 |
| CEU | CSH | 18527873 | 4.946   | 5.2874  | -0.1836 |
| CEU | CSH | 18532873 | 5.2338  | 4.9463  | 0.164   |
| CEU | CSH | 18537873 | 9.0981  | 7.1636  | 0.7919  |
| CEU | CSH | 18542873 | 12.1523 | 10.2337 | 0.5652  |
| CEU | CSH | 18547873 | 10.6617 | 10.7454 | -0.0236 |
| CEU | CSH | 18552873 | 7.6696  | 8.6987  | -0.3526 |
| CEU | CSH | 18557873 | 9.619   | 8.187   | 0.5188  |
| CEU | CSH | 18562873 | 9.4816  | 7.1636  | 0.9489  |
| CEU | CSH | 18567873 | 6.0303  | 5.2874  | 0.3995  |
| CEU | CSH | 18572873 | 10.7535 | 6.9931  | 1.5734  |
| CEU | CSH | 18577873 | 12.0293 | 10.916  | 0.3088  |
| CEU | CSH | 18582873 | 15.1853 | 12.9627 | 0.5243  |
| CEU | CSH | 18587873 | 20.2626 | 12.1099 | 2.051   |
| CEU | CSH | 18592873 | 17.1831 | 9.8926  | 2.2168  |
| CEU | CSH | 18597873 | 11.4669 | 7.8459  | 1.3641  |
| CEU | CSH | 18602873 | 7.9814  | 7.6753  | 0.1177  |
| CEU | CSH | 18607873 | 6.1119  | 6.3108  | -0.0913 |
| CEU | CSH | 18612873 | 5.1717  | 5.7991  | -0.3107 |
| CEU | CSH | 18617873 | 9.7619  | 9.5515  | 0.0661  |
| CEU | CSH | 18622873 | 10.4156 | 9.5515  | 0.2715  |
| CEU | CSH | 18627873 | 8.2191  | 7.1636  | 0.4321  |
| CEU | CSH | 18632873 | 9.1214  | 7.1636  | 0.8014  |
| CEU | CSH | 18637873 | 9.625   | 6.9931  | 1.1012  |
| CEU | CSH | 18642873 | 9.7289  | 7.1636  | 1.0501  |



## 2\_TajimasD\_data

|     |     |          |         |         |         |
|-----|-----|----------|---------|---------|---------|
| CEU | CSH | 18647873 | 7.7974  | 7.3342  | 0.1856  |
| CEU | CSH | 18652873 | 7.9182  | 7.8459  | 0.0272  |
| CEU | CSH | 18657873 | 8.7931  | 8.3576  | 0.1548  |
| CEU | CSH | 18662873 | 10.2901 | 9.5515  | 0.232   |
| CEU | CSH | 18667873 | 10.0773 | 8.8692  | 0.4065  |
| CEU | CSH | 18672873 | 9.6465  | 8.5281  | 0.3902  |
| CEU | CSH | 18677873 | 11.7667 | 9.0398  | 0.9016  |
| CEU | CSH | 18682873 | 15.4617 | 9.2104  | 2.0313  |
| CEU | CSH | 18687873 | 13.399  | 7.6753  | 2.2     |
| CEU | CSH | 18692873 | 7.8871  | 5.9697  | 0.9254  |
| CEU | CSH | 18697873 | 9.3348  | 7.8459  | 0.5609  |
| CEU | CSH | 18702873 | 12.0672 | 9.5515  | 0.7903  |
| CEU | CSH | 18707873 | 9.2109  | 8.0164  | 0.4412  |
| CEU | CSH | 18712873 | 7.7803  | 6.1402  | 0.7718  |
| CEU | CSH | 18717873 | 7.3603  | 4.9463  | 1.3767  |
| CEU | CSH | 18722873 | 7.3265  | 5.2874  | 1.0964  |
| CEU | CSH | 18727873 | 6.9114  | 5.6286  | 0.6525  |
| CEU | CSH | 18732873 | 3.3443  | 4.2641  | -0.5971 |
| CEU | CSH | 18737873 | 4.7318  | 5.7991  | -0.5286 |
| CEU | CSH | 18742873 | 4.737   | 5.2874  | -0.296  |
| CEU | CSH | 18747873 | 5.1602  | 5.2874  | -0.0684 |
| CEU | CSH | 18752873 | 8.4636  | 7.1636  | 0.5322  |
| CEU | CSH | 18757873 | 11.9584 | 7.5047  | 1.7474  |
| CEU | CSH | 18762873 | 17.0954 | 10.5749 | 1.863   |
| CEU | CSH | 18767873 | 18.8435 | 11.9394 | 1.7602  |
| CEU | CSH | 18772873 | 20.188  | 11.9394 | 2.103   |
| CEU | CSH | 18777873 | 16.733  | 9.7221  | 2.1666  |
| CEU | CSH | 18782873 | 13.6879 | 8.5281  | 1.8003  |
| CEU | CSH | 18787873 | 15.853  | 10.4043 | 1.5806  |
| CEU | CSH | 18792873 | 15.8189 | 10.2337 | 1.6454  |
| CEU | CSH | 18797873 | 13.1436 | 8.5281  | 1.6104  |
| CEU | CSH | 18802873 | 10.4063 | 7.6753  | 1.0497  |
| CEU | CSH | 18807873 | 11.529  | 8.3576  | 1.1273  |
| CEU | CSH | 18812873 | 12.1532 | 9.0398  | 1.0294  |
| CEU | CSH | 18817873 | 11.2694 | 10.0632 | 0.361   |
| CEU | CSH | 18822873 | 8.4787  | 9.2104  | -0.2378 |
| CEU | CSH | 18827873 | 7.0161  | 8.0164  | -0.3695 |
| CEU | CSH | 18832873 | 7.5807  | 8.187   | -0.2196 |
| CEU | CSH | 18837873 | 7.9659  | 8.8692  | -0.304  |
| CEU | CSH | 18842873 | 12.936  | 10.0632 | 0.8597  |
| CEU | CSH | 18847873 | 13.8582 | 10.4043 | 1.002   |
| CEU | CSH | 18852873 | 10.6277 | 11.2571 | -0.1696 |
| CEU | CSH | 18857873 | 7.3523  | 9.8926  | -0.7724 |
| CHB | CSH | 17832873 | 3.8578  | 7.9625  | -1.5211 |
| CHB | CSH | 17837873 | 3.5186  | 6.6072  | -1.3565 |
| CHB | CSH | 17842873 | 3.2153  | 6.4378  | -1.4489 |
| CHB | CSH | 17847873 | 5.2509  | 9.8261  | -1.3959 |
| CHB | CSH | 17852873 | 6.746   | 10.5037 | -1.0773 |
| CHB | CSH | 17857873 | 4.961   | 8.4708  | -1.2287 |

## 2\_TajimasD\_data

|     |     |          |         |         |         |
|-----|-----|----------|---------|---------|---------|
| CHB | CSH | 17862873 | 4.8835  | 8.3013  | -1.2189 |
| CHB | CSH | 17867873 | 5.6948  | 7.2848  | -0.6391 |
| CHB | CSH | 17872873 | 5.6525  | 7.4543  | -0.7092 |
| CHB | CSH | 17877873 | 4.7096  | 7.9625  | -1.2054 |
| CHB | CSH | 17882873 | 5.9516  | 8.8096  | -0.9649 |
| CHB | CSH | 17887873 | 4.8985  | 7.4543  | -1.006  |
| CHB | CSH | 17892873 | 2.7223  | 6.2684  | -1.6332 |
| CHB | CSH | 17897873 | 4.2246  | 7.6237  | -1.3108 |
| CHB | CSH | 17902873 | 5.4061  | 9.3178  | -1.2538 |
| CHB | CSH | 17907873 | 4.2389  | 7.6237  | -1.3053 |
| CHB | CSH | 17912873 | 3.1186  | 5.9295  | -1.3608 |
| CHB | CSH | 17917873 | 3.1022  | 8.3013  | -1.8542 |
| CHB | CSH | 17922873 | 2.4196  | 7.9625  | -2.054  |
| CHB | CSH | 17927873 | 2.9591  | 6.2684  | -1.5241 |
| CHB | CSH | 17932873 | 2.9602  | 5.4213  | -1.2905 |
| CHB | CSH | 17937873 | 2.9109  | 6.0989  | -1.5049 |
| CHB | CSH | 17942873 | 3.1569  | 6.6072  | -1.5154 |
| CHB | CSH | 17947873 | 4.1721  | 7.6237  | -1.331  |
| CHB | CSH | 17952873 | 5.8616  | 8.979   | -1.0341 |
| CHB | CSH | 17957873 | 4.4555  | 7.2848  | -1.1373 |
| CHB | CSH | 17962873 | 3.3143  | 6.7766  | -1.4862 |
| CHB | CSH | 17967873 | 3.6792  | 8.8096  | -1.7322 |
| CHB | CSH | 17972873 | 5.9852  | 10.3343 | -1.266  |
| CHB | CSH | 17977873 | 8.0718  | 9.4872  | -0.4462 |
| CHB | CSH | 17982873 | 7.7283  | 8.3013  | -0.2044 |
| CHB | CSH | 17987873 | 9.9079  | 10.5037 | -0.1708 |
| CHB | CSH | 17992873 | 8.853   | 11.1814 | -0.6296 |
| CHB | CSH | 17997873 | 4.6613  | 7.1154  | -1.0078 |
| CHB | CSH | 18002873 | 6.004   | 7.2848  | -0.5148 |
| CHB | CSH | 18007873 | 7.688   | 9.4872  | -0.5671 |
| CHB | CSH | 18012873 | 8.5856  | 9.6567  | -0.3321 |
| CHB | CSH | 18017873 | 10.2393 | 8.6402  | 0.5497  |
| CHB | CSH | 18022873 | 8.9457  | 6.7766  | 0.9311  |
| CHB | CSH | 18027873 | 8.6804  | 8.1319  | 0.1994  |
| CHB | CSH | 18032873 | 6.0067  | 7.4543  | -0.5698 |
| CHB | CSH | 18037873 | 4.2968  | 5.9295  | -0.7904 |
| CHB | CSH | 18042873 | 9.4283  | 7.6237  | 0.6959  |
| CHB | CSH | 18047873 | 7.1354  | 6.7766  | 0.154   |
| CHB | CSH | 18052873 | 3.5328  | 5.7601  | -1.1066 |
| CHB | CSH | 18057873 | 4.2857  | 5.7601  | -0.7325 |
| CHB | CSH | 18062873 | 3.2243  | 7.1154  | -1.598  |
| CHB | CSH | 18067873 | 4.8192  | 8.979   | -1.3799 |
| CHB | CSH | 18072873 | 5.7188  | 7.6237  | -0.7346 |
| CHB | CSH | 18077873 | 4.1072  | 7.1154  | -1.2354 |
| CHB | CSH | 18082873 | 3.7373  | 5.7601  | -1.005  |
| CHB | CSH | 18087873 | 4.3333  | 5.7601  | -0.7089 |
| CHB | CSH | 18092873 | 5.0293  | 7.9625  | -1.087  |
| CHB | CSH | 18097873 | 4.2178  | 6.0989  | -0.888  |
| CHB | CSH | 18102873 | 3.657   | 8.6402  | -1.7129 |

## 2\_TajimasD\_data

|     |     |          |         |         |         |
|-----|-----|----------|---------|---------|---------|
| CHB | CSH | 18107873 | 5.9661  | 11.8591 | -1.5077 |
| CHB | CSH | 18112873 | 5.3695  | 7.9625  | -0.9609 |
| CHB | CSH | 18117873 | 3.6288  | 5.5907  | -1.001  |
| CHB | CSH | 18122873 | 4.3055  | 9.4872  | -1.6334 |
| CHB | CSH | 18127873 | 7.6522  | 11.8591 | -1.0763 |
| CHB | CSH | 18132873 | 11.1274 | 10.1649 | 0.2845  |
| CHB | CSH | 18137873 | 9.7521  | 9.6567  | 0.0296  |
| CHB | CSH | 18142873 | 6.8119  | 8.4708  | -0.5807 |
| CHB | CSH | 18147873 | 5.5938  | 9.1484  | -1.1589 |
| CHB | CSH | 18152873 | 6.5717  | 9.8261  | -0.9929 |
| CHB | CSH | 18157873 | 4.8096  | 6.4378  | -0.7321 |
| CHB | CSH | 18162873 | 3.984   | 5.5907  | -0.8198 |
| CHB | CSH | 18167873 | 5.8176  | 8.3013  | -0.8858 |
| CHB | CSH | 18172873 | 7.2435  | 11.1814 | -1.0648 |
| CHB | CSH | 18177873 | 6.649   | 11.1814 | -1.2255 |
| CHB | CSH | 18182873 | 4.8119  | 9.8261  | -1.5298 |
| CHB | CSH | 18187873 | 7.0051  | 11.1814 | -1.1292 |
| CHB | CSH | 18192873 | 6.8073  | 10.1649 | -0.9925 |
| CHB | CSH | 18197873 | 6.4512  | 10.6731 | -1.1924 |
| CHB | CSH | 18202873 | 5.3156  | 9.4872  | -1.315  |
| CHB | CSH | 18207873 | 7.3194  | 9.8261  | -0.7648 |
| CHB | CSH | 18212873 | 10.0282 | 12.3673 | -0.5752 |
| CHB | CSH | 18217873 | 8.6242  | 9.9955  | -0.4118 |
| CHB | CSH | 18222873 | 10.8094 | 9.9955  | 0.2444  |
| CHB | CSH | 18227873 | 8.1772  | 9.3178  | -0.3656 |
| CHB | CSH | 18232873 | 3.7765  | 7.6237  | -1.4836 |
| CHB | CSH | 18237873 | 5.0908  | 7.9625  | -1.0642 |
| CHB | CSH | 18242873 | 7.0872  | 8.3013  | -0.433  |
| CHB | CSH | 18247873 | 7.5168  | 8.3013  | -0.2798 |
| CHB | CSH | 18252873 | 13.0482 | 11.5202 | 0.4017  |
| CHB | CSH | 18257873 | 15.648  | 12.5367 | 0.7554  |
| CHB | CSH | 18262873 | 11.6699 | 11.1814 | 0.1321  |
| CHB | CSH | 18267873 | 14.3879 | 13.5532 | 0.1882  |
| CHB | CSH | 18272873 | 12.4779 | 12.3673 | 0.0272  |
| CHB | CSH | 18277873 | 5.9792  | 9.8261  | -1.1737 |
| CHB | CSH | 18282873 | 4.7004  | 9.4872  | -1.5089 |
| CHB | CSH | 18287873 | 18.2096 | 15.7556 | 0.4796  |
| CHB | CSH | 18292873 | 24.2519 | 17.6192 | 1.1647  |
| CHB | CSH | 18297873 | 11.5952 | 9.6567  | 0.6011  |
| CHB | CSH | 18302873 | 7.1885  | 7.9625  | -0.2868 |
| CHB | CSH | 18307873 | 5.5535  | 7.2848  | -0.6959 |
| CHB | CSH | 18312873 | 3.9947  | 6.946   | -1.2388 |
| CHB | CSH | 18317873 | 4.4578  | 8.3013  | -1.3708 |
| CHB | CSH | 18322873 | 4.7314  | 8.1319  | -1.236  |
| CHB | CSH | 18327873 | 3.8572  | 5.7601  | -0.9454 |
| CHB | CSH | 18332873 | 3.0735  | 2.7106  | 0.3439  |
| CHB | CSH | 18337873 | 3.1696  | 1.8636  | 1.6663  |
| CHB | CSH | 18342873 | 4.7868  | 3.3883  | 1.1013  |
| CHB | CSH | 18347873 | 4.5761  | 4.4048  | 0.1078  |

## 2\_TajimasD\_data

|     |     |          |         |         |         |
|-----|-----|----------|---------|---------|---------|
| CHB | CSH | 18352873 | 10.2646 | 7.2848  | 1.1978  |
| CHB | CSH | 18357873 | 11.6402 | 9.3178  | 0.7444  |
| CHB | CSH | 18362873 | 5.7754  | 7.4543  | -0.6609 |
| CHB | CSH | 18367873 | 5.2182  | 5.9295  | -0.3444 |
| CHB | CSH | 18372873 | 2.2073  | 3.8965  | -1.1815 |
| CHB | CSH | 18377873 | 0.833   | 3.3883  | -2.0124 |
| CHB | CSH | 18382873 | 1.8496  | 3.8965  | -1.4316 |
| CHB | CSH | 18387873 | 3.1192  | 6.0989  | -1.4065 |
| CHB | CSH | 18392873 | 3.8024  | 8.4708  | -1.6343 |
| CHB | CSH | 18397873 | 2.2547  | 6.6072  | -1.9117 |
| CHB | CSH | 18402873 | 1.4622  | 3.7271  | -1.6454 |
| CHB | CSH | 18407873 | 1.6212  | 2.8801  | -1.135  |
| CHB | CSH | 18412873 | 1.5989  | 3.0495  | -1.2475 |
| CHB | CSH | 18417873 | 1.4535  | 3.7271  | -1.6517 |
| CHB | CSH | 18422873 | 1.2353  | 3.3883  | -1.6955 |
| CHB | CSH | 18427873 | 0.8028  | 2.033   | -1.467  |
| CHB | CSH | 18432873 | 0.0583  | 1.0165  | -1.9069 |
| CHB | CSH | 18437873 | 0.7215  | 1.8636  | -1.4572 |
| CHB | CSH | 18442873 | 0.77    | 2.7106  | -1.8388 |
| CHB | CSH | 18447873 | 0.6686  | 3.2189  | -2.0967 |
| CHB | CSH | 18452873 | 0.6973  | 3.2189  | -2.0731 |
| CHB | CSH | 18457873 | 0.6469  | 2.033   | -1.6529 |
| CHB | CSH | 18462873 | 1.8808  | 3.7271  | -1.3413 |
| CHB | CSH | 18467873 | 1.9728  | 5.0825  | -1.7264 |
| CHB | CSH | 18472873 | 1.2187  | 4.4048  | -2.0049 |
| CHB | CSH | 18477873 | 0.9383  | 3.2189  | -1.875  |
| CHB | CSH | 18482873 | 0.6608  | 2.5412  | -1.8777 |
| CHB | CSH | 18487873 | 0.6358  | 3.0495  | -2.0758 |
| CHB | CSH | 18492873 | 1.9023  | 3.7271  | -1.3257 |
| CHB | CSH | 18497873 | 2.7481  | 4.066   | -0.8887 |
| CHB | CSH | 18502873 | 2.3208  | 4.2354  | -1.2464 |
| CHB | CSH | 18507873 | 1.2975  | 3.3883  | -1.6466 |
| CHB | CSH | 18512873 | 0.7114  | 3.2189  | -2.0615 |
| CHB | CSH | 18517873 | 1.1167  | 3.5577  | -1.8448 |
| CHB | CSH | 18522873 | 2.4342  | 5.0825  | -1.4703 |
| CHB | CSH | 18527873 | 2.6347  | 6.6072  | -1.7448 |
| CHB | CSH | 18532873 | 2.0251  | 5.9295  | -1.8902 |
| CHB | CSH | 18537873 | 3.3739  | 7.4543  | -1.6062 |
| CHB | CSH | 18542873 | 3.7594  | 9.1484  | -1.757  |
| CHB | CSH | 18547873 | 5.1173  | 11.012  | -1.6169 |
| CHB | CSH | 18552873 | 7.1649  | 10.5037 | -0.9572 |
| CHB | CSH | 18557873 | 10.9202 | 9.1484  | 0.5777  |
| CHB | CSH | 18562873 | 9.4896  | 11.012  | -0.4176 |
| CHB | CSH | 18567873 | 6.4666  | 16.0944 | -1.8436 |
| CHB | CSH | 18572873 | 11.0314 | 17.958  | -1.1943 |
| CHB | CSH | 18577873 | 9.3179  | 15.925  | -1.2781 |
| CHB | CSH | 18582873 | 9.596   | 14.7391 | -1.071  |
| CHB | CSH | 18587873 | 16.0215 | 14.5697 | 0.3057  |
| CHB | CSH | 18592873 | 15.762  | 12.1979 | 0.888   |

## 2\_TajimasD\_data

|     |     |          |         |         |         |
|-----|-----|----------|---------|---------|---------|
| CHB | CSH | 18597873 | 12.3929 | 8.979   | 1.1325  |
| CHB | CSH | 18602873 | 9.9336  | 8.8096  | 0.3795  |
| CHB | CSH | 18607873 | 6.6929  | 7.1154  | -0.1735 |
| CHB | CSH | 18612873 | 4.439   | 4.913   | -0.2711 |
| CHB | CSH | 18617873 | 8.9001  | 7.7931  | 0.4184  |
| CHB | CSH | 18622873 | 8.7754  | 7.6237  | 0.4441  |
| CHB | CSH | 18627873 | 6.751   | 5.5907  | 0.592   |
| CHB | CSH | 18632873 | 8.4245  | 6.6072  | 0.7982  |
| CHB | CSH | 18637873 | 9.3307  | 7.7931  | 0.5811  |
| CHB | CSH | 18642873 | 10.6431 | 9.6567  | 0.3059  |
| CHB | CSH | 18647873 | 7.7171  | 7.7931  | -0.0287 |
| CHB | CSH | 18652873 | 5.6507  | 5.7601  | -0.0544 |
| CHB | CSH | 18657873 | 6.8076  | 6.4378  | 0.1663  |
| CHB | CSH | 18662873 | 9.3816  | 10.3343 | -0.2773 |
| CHB | CSH | 18667873 | 8.6779  | 10.5037 | -0.5235 |
| CHB | CSH | 18672873 | 7.7451  | 8.3013  | -0.1984 |
| CHB | CSH | 18677873 | 11.4249 | 8.8096  | 0.883   |
| CHB | CSH | 18682873 | 14.2538 | 10.1649 | 1.2087  |
| CHB | CSH | 18687873 | 11.187  | 8.4708  | 0.9509  |
| CHB | CSH | 18692873 | 7.092   | 6.0989  | 0.4688  |
| CHB | CSH | 18697873 | 9.4289  | 8.3013  | 0.4022  |
| CHB | CSH | 18702873 | 12.9556 | 11.3508 | 0.4278  |
| CHB | CSH | 18707873 | 9.6183  | 10.1649 | -0.1616 |
| CHB | CSH | 18712873 | 7.5842  | 7.2848  | 0.1203  |
| CHB | CSH | 18717873 | 6.7192  | 7.2848  | -0.2274 |
| CHB | CSH | 18722873 | 5.7425  | 7.9625  | -0.8227 |
| CHB | CSH | 18727873 | 5.5034  | 6.6072  | -0.4848 |
| CHB | CSH | 18732873 | 2.3299  | 4.066   | -1.1707 |
| CHB | CSH | 18737873 | 2.8917  | 5.9295  | -1.4706 |
| CHB | CSH | 18742873 | 2.7204  | 5.5907  | -1.4645 |
| CHB | CSH | 18747873 | 3.7373  | 4.913   | -0.6725 |
| CHB | CSH | 18752873 | 7.0735  | 8.1319  | -0.3847 |
| CHB | CSH | 18757873 | 10.8214 | 9.4872  | 0.4206  |
| CHB | CSH | 18762873 | 15.6408 | 11.8591 | 0.9675  |
| CHB | CSH | 18767873 | 18.7868 | 13.3838 | 1.2331  |
| CHB | CSH | 18772873 | 20.0058 | 14.0615 | 1.2945  |
| CHB | CSH | 18777873 | 14.8286 | 12.0285 | 0.7069  |
| CHB | CSH | 18782873 | 12.3105 | 10.8426 | 0.4085  |
| CHB | CSH | 18787873 | 14.0615 | 12.0285 | 0.5132  |
| CHB | CSH | 18792873 | 13.4224 | 11.3508 | 0.5523  |
| CHB | CSH | 18797873 | 10.8772 | 10.3343 | 0.158   |
| CHB | CSH | 18802873 | 9.6033  | 9.4872  | 0.0366  |
| CHB | CSH | 18807873 | 10.4274 | 9.1484  | 0.417   |
| CHB | CSH | 18812873 | 9.4268  | 8.6402  | 0.2704  |
| CHB | CSH | 18817873 | 9.7539  | 9.8261  | -0.022  |
| CHB | CSH | 18822873 | 7.9022  | 9.4872  | -0.4996 |
| CHB | CSH | 18827873 | 6.264   | 9.1484  | -0.9404 |
| CHB | CSH | 18832873 | 6.1847  | 8.4708  | -0.8003 |
| CHB | CSH | 18837873 | 6.1704  | 7.2848  | -0.448  |

## 2\_TajimasD\_data

|     |     |          |         |         |         |
|-----|-----|----------|---------|---------|---------|
| CHB | CSH | 18842873 | 10.5385 | 9.1484  | 0.4532  |
| CHB | CSH | 18847873 | 10.8675 | 9.8261  | 0.3177  |
| CHB | CSH | 18852873 | 11.3156 | 9.3178  | 0.6404  |
| CHB | CSH | 18857873 | 10.0725 | 7.4543  | 1.0306  |
| YRI | CSH | 17832873 | 10.3284 | 11.2602 | -0.2494 |
| YRI | CSH | 17837873 | 6.8799  | 9.0754  | -0.7187 |
| YRI | CSH | 17842873 | 6.2785  | 8.5712  | -0.7912 |
| YRI | CSH | 17847873 | 10.4134 | 10.4199 | -0.0019 |
| YRI | CSH | 17852873 | 12.6228 | 11.0921 | 0.4156  |
| YRI | CSH | 17857873 | 9.6327  | 10.0837 | -0.1339 |
| YRI | CSH | 17862873 | 9.3752  | 10.4199 | -0.3007 |
| YRI | CSH | 17867873 | 10.8534 | 12.1005 | -0.312  |
| YRI | CSH | 17872873 | 12.1346 | 11.2602 | 0.2341  |
| YRI | CSH | 17877873 | 10.8537 | 9.2434  | 0.5182  |
| YRI | CSH | 17882873 | 9.0003  | 10.4199 | -0.4087 |
| YRI | CSH | 17887873 | 6.3971  | 10.0837 | -1.0942 |
| YRI | CSH | 17892873 | 6.2354  | 9.4115  | -1.0052 |
| YRI | CSH | 17897873 | 8.6801  | 9.7476  | -0.327  |
| YRI | CSH | 17902873 | 10.1223 | 10.924  | -0.2208 |
| YRI | CSH | 17907873 | 8.6376  | 10.0837 | -0.4292 |
| YRI | CSH | 17912873 | 6.0642  | 8.067   | -0.7308 |
| YRI | CSH | 17917873 | 7.0601  | 11.7644 | -1.2086 |
| YRI | CSH | 17922873 | 6.5793  | 11.9324 | -1.357  |
| YRI | CSH | 17927873 | 4.9699  | 7.8989  | -1.0897 |
| YRI | CSH | 17932873 | 4.0604  | 6.8906  | -1.1926 |
| YRI | CSH | 17937873 | 5.7989  | 8.4031  | -0.9153 |
| YRI | CSH | 17942873 | 7.4263  | 9.0754  | -0.5398 |
| YRI | CSH | 17947873 | 10.593  | 10.924  | -0.0912 |
| YRI | CSH | 17952873 | 12.4161 | 11.5963 | 0.2135  |
| YRI | CSH | 17957873 | 8.3621  | 8.067   | 0.1077  |
| YRI | CSH | 17962873 | 7.1776  | 7.0586  | 0.0491  |
| YRI | CSH | 17967873 | 7.7606  | 10.2518 | -0.7281 |
| YRI | CSH | 17972873 | 10.6354 | 13.1089 | -0.5738 |
| YRI | CSH | 17977873 | 12.9218 | 12.7727 | 0.0354  |
| YRI | CSH | 17982873 | 11.1867 | 10.924  | 0.0724  |
| YRI | CSH | 17987873 | 11.8473 | 13.613  | -0.3952 |
| YRI | CSH | 17992873 | 10.5871 | 13.7811 | -0.7066 |
| YRI | CSH | 17997873 | 6.8306  | 10.0837 | -0.9656 |
| YRI | CSH | 18002873 | 7.9836  | 12.7727 | -1.1385 |
| YRI | CSH | 18007873 | 10.072  | 14.6214 | -0.9514 |
| YRI | CSH | 18012873 | 10.1002 | 14.7895 | -0.9701 |
| YRI | CSH | 18017873 | 10.5777 | 14.9575 | -0.8964 |
| YRI | CSH | 18022873 | 10.0573 | 13.9492 | -0.8512 |
| YRI | CSH | 18027873 | 9.8677  | 13.7811 | -0.8658 |
| YRI | CSH | 18032873 | 7.0612  | 11.4282 | -1.1529 |
| YRI | CSH | 18037873 | 5.018   | 8.9073  | -1.2954 |
| YRI | CSH | 18042873 | 8.6011  | 10.0837 | -0.4401 |
| YRI | CSH | 18047873 | 7.1848  | 8.9073  | -0.5737 |
| YRI | CSH | 18052873 | 5.5897  | 7.2267  | -0.6606 |

## 2\_TajimasD\_data

|     |     |          |         |         |         |
|-----|-----|----------|---------|---------|---------|
| YRI | CSH | 18057873 | 6.8208  | 9.2434  | -0.7797 |
| YRI | CSH | 18062873 | 7.7561  | 10.756  | -0.8383 |
| YRI | CSH | 18067873 | 11.407  | 12.4366 | -0.251  |
| YRI | CSH | 18072873 | 10.7424 | 11.7644 | -0.2626 |
| YRI | CSH | 18077873 | 8.3014  | 11.2602 | -0.7921 |
| YRI | CSH | 18082873 | 6.865   | 11.9324 | -1.2846 |
| YRI | CSH | 18087873 | 7.0776  | 12.2685 | -1.2819 |
| YRI | CSH | 18092873 | 9.5221  | 13.445  | -0.8884 |
| YRI | CSH | 18097873 | 8.4078  | 10.756  | -0.6562 |
| YRI | CSH | 18102873 | 11.1948 | 11.9324 | -0.187  |
| YRI | CSH | 18107873 | 14.944  | 14.2853 | 0.1408  |
| YRI | CSH | 18112873 | 11.8557 | 11.9324 | -0.0194 |
| YRI | CSH | 18117873 | 7.724   | 10.0837 | -0.7004 |
| YRI | CSH | 18122873 | 9.0694  | 12.6047 | -0.851  |
| YRI | CSH | 18127873 | 12.6827 | 15.9659 | -0.6314 |
| YRI | CSH | 18132873 | 12.9741 | 15.1256 | -0.4357 |
| YRI | CSH | 18137873 | 9.9659  | 12.7727 | -0.6673 |
| YRI | CSH | 18142873 | 7.5162  | 12.1005 | -1.1469 |
| YRI | CSH | 18147873 | 7.2927  | 11.7644 | -1.1488 |
| YRI | CSH | 18152873 | 7.5013  | 10.924  | -0.9427 |
| YRI | CSH | 18157873 | 6.7349  | 9.5795  | -0.8856 |
| YRI | CSH | 18162873 | 6.0567  | 10.2518 | -1.2261 |
| YRI | CSH | 18167873 | 7.8743  | 12.9408 | -1.1897 |
| YRI | CSH | 18172873 | 11.2837 | 14.6214 | -0.698  |
| YRI | CSH | 18177873 | 13.215  | 14.4534 | -0.2619 |
| YRI | CSH | 18182873 | 11.9122 | 11.5963 | 0.0823  |
| YRI | CSH | 18187873 | 14.1721 | 12.7727 | 0.3327  |
| YRI | CSH | 18192873 | 12.7688 | 13.7811 | -0.224  |
| YRI | CSH | 18197873 | 12.0342 | 13.1089 | -0.2493 |
| YRI | CSH | 18202873 | 10.5961 | 12.2685 | -0.413  |
| YRI | CSH | 18207873 | 10.6795 | 12.7727 | -0.4976 |
| YRI | CSH | 18212873 | 14.5077 | 14.1172 | 0.0844  |
| YRI | CSH | 18217873 | 13.0504 | 12.6047 | 0.1073  |
| YRI | CSH | 18222873 | 14.2164 | 13.2769 | 0.2153  |
| YRI | CSH | 18227873 | 13.4136 | 12.9408 | 0.111   |
| YRI | CSH | 18232873 | 10.7161 | 11.9324 | -0.3083 |
| YRI | CSH | 18237873 | 11.7689 | 12.7727 | -0.2386 |
| YRI | CSH | 18242873 | 12.3465 | 13.1089 | -0.1769 |
| YRI | CSH | 18247873 | 10.8023 | 12.2685 | -0.3621 |
| YRI | CSH | 18252873 | 14.1057 | 13.1089 | 0.2312  |
| YRI | CSH | 18257873 | 14.321  | 13.9492 | 0.0813  |
| YRI | CSH | 18262873 | 12.3457 | 15.4617 | -0.6179 |
| YRI | CSH | 18267873 | 17.3201 | 19.3272 | -0.3214 |
| YRI | CSH | 18272873 | 15.5478 | 16.8062 | -0.2304 |
| YRI | CSH | 18277873 | 10.3203 | 13.613  | -0.737  |
| YRI | CSH | 18282873 | 9.8383  | 13.445  | -0.8168 |
| YRI | CSH | 18287873 | 28.6207 | 19.4952 | 1.4491  |
| YRI | CSH | 18292873 | 35.1227 | 19.6633 | 2.4346  |
| YRI | CSH | 18297873 | 17.3138 | 10.4199 | 1.9845  |

## 2\_TajimasD\_data

|     |     |          |         |         |         |
|-----|-----|----------|---------|---------|---------|
| YRI | CSH | 18302873 | 15.1714 | 10.4199 | 1.3678  |
| YRI | CSH | 18307873 | 14.3949 | 12.6047 | 0.431   |
| YRI | CSH | 18312873 | 9.5439  | 13.445  | -0.8835 |
| YRI | CSH | 18317873 | 7.5817  | 12.9408 | -1.2584 |
| YRI | CSH | 18322873 | 6.4815  | 10.4199 | -1.1337 |
| YRI | CSH | 18327873 | 4.9467  | 7.2267  | -0.92   |
| YRI | CSH | 18332873 | 3.3114  | 4.0335  | -0.4886 |
| YRI | CSH | 18337873 | 3.5796  | 2.8571  | 0.6534  |
| YRI | CSH | 18342873 | 6.8554  | 5.5461  | 0.6705  |
| YRI | CSH | 18347873 | 7.2042  | 9.2434  | -0.6563 |
| YRI | CSH | 18352873 | 11.7355 | 11.4282 | 0.0811  |
| YRI | CSH | 18357873 | 14.5869 | 13.445  | 0.2586  |
| YRI | CSH | 18362873 | 9.6039  | 12.1005 | -0.6246 |
| YRI | CSH | 18367873 | 7.8297  | 11.5963 | -0.9808 |
| YRI | CSH | 18372873 | 4.369   | 8.5712  | -1.4502 |
| YRI | CSH | 18377873 | 3.4793  | 8.235   | -1.7028 |
| YRI | CSH | 18382873 | 4.8416  | 9.5795  | -1.4751 |
| YRI | CSH | 18387873 | 5.7814  | 8.5712  | -0.9628 |
| YRI | CSH | 18392873 | 5.5224  | 9.5795  | -1.2631 |
| YRI | CSH | 18397873 | 3.491   | 7.7309  | -1.6087 |
| YRI | CSH | 18402873 | 3.1512  | 5.7141  | -1.278  |
| YRI | CSH | 18407873 | 2.4414  | 5.8822  | -1.6719 |
| YRI | CSH | 18412873 | 2.7995  | 7.5628  | -1.844  |
| YRI | CSH | 18417873 | 3.616   | 8.5712  | -1.7101 |
| YRI | CSH | 18422873 | 4.1179  | 6.8906  | -1.1683 |
| YRI | CSH | 18427873 | 3.974   | 7.2267  | -1.3125 |
| YRI | CSH | 18432873 | 4.0431  | 8.7392  | -1.5919 |
| YRI | CSH | 18437873 | 4.7441  | 8.4031  | -1.286  |
| YRI | CSH | 18442873 | 3.6666  | 7.2267  | -1.4366 |
| YRI | CSH | 18447873 | 3.7658  | 7.0586  | -1.3575 |
| YRI | CSH | 18452873 | 4.265   | 9.4115  | -1.6288 |
| YRI | CSH | 18457873 | 3.0633  | 8.067   | -1.8259 |
| YRI | CSH | 18462873 | 4.0453  | 7.7309  | -1.3984 |
| YRI | CSH | 18467873 | 4.5271  | 8.5712  | -1.3956 |
| YRI | CSH | 18472873 | 3.3657  | 8.7392  | -1.8215 |
| YRI | CSH | 18477873 | 3.494   | 8.9073  | -1.8029 |
| YRI | CSH | 18482873 | 2.983   | 7.2267  | -1.7124 |
| YRI | CSH | 18487873 | 2.8677  | 6.8906  | -1.6951 |
| YRI | CSH | 18492873 | 3.4841  | 6.3864  | -1.3099 |
| YRI | CSH | 18497873 | 5.1089  | 8.067   | -1.0794 |
| YRI | CSH | 18502873 | 6.1886  | 8.235   | -0.7327 |
| YRI | CSH | 18507873 | 3.7763  | 7.0586  | -1.3531 |
| YRI | CSH | 18512873 | 2.8449  | 9.5795  | -2.0967 |
| YRI | CSH | 18517873 | 3.4307  | 8.5712  | -1.774  |
| YRI | CSH | 18522873 | 4.1816  | 8.4031  | -1.4837 |
| YRI | CSH | 18527873 | 5.0376  | 10.756  | -1.598  |
| YRI | CSH | 18532873 | 4.2079  | 9.0754  | -1.5934 |
| YRI | CSH | 18537873 | 7.218   | 11.2602 | -1.0821 |
| YRI | CSH | 18542873 | 10.9634 | 14.4534 | -0.7379 |



## 2\_TajimasD\_data

|     |     |          |         |         |         |
|-----|-----|----------|---------|---------|---------|
| YRI | CSH | 18547873 | 14.5592 | 16.134  | -0.2998 |
| YRI | CSH | 18552873 | 13.9512 | 14.2853 | -0.0714 |
| YRI | CSH | 18557873 | 13.3531 | 12.2685 | 0.2678  |
| YRI | CSH | 18562873 | 14.7574 | 13.7811 | 0.216   |
| YRI | CSH | 18567873 | 20.8823 | 16.4701 | 0.8237  |
| YRI | CSH | 18572873 | 26.5774 | 19.6633 | 1.0889  |
| YRI | CSH | 18577873 | 25.0178 | 19.6633 | 0.8433  |
| YRI | CSH | 18582873 | 23.1037 | 18.991  | 0.6697  |
| YRI | CSH | 18587873 | 20.7432 | 19.8313 | 0.1424  |
| YRI | CSH | 18592873 | 17.3227 | 17.8146 | -0.0852 |
| YRI | CSH | 18597873 | 13.0411 | 13.613  | -0.128  |
| YRI | CSH | 18602873 | 10.2735 | 10.5879 | -0.0892 |
| YRI | CSH | 18607873 | 7.5665  | 9.2434  | -0.5397 |
| YRI | CSH | 18612873 | 5.6971  | 8.9073  | -1.0692 |
| YRI | CSH | 18617873 | 9.7464  | 10.5879 | -0.2386 |
| YRI | CSH | 18622873 | 10.8062 | 11.7644 | -0.2462 |
| YRI | CSH | 18627873 | 8.0144  | 11.7644 | -0.9634 |
| YRI | CSH | 18632873 | 9.192   | 12.4366 | -0.791  |
| YRI | CSH | 18637873 | 10.6878 | 12.4366 | -0.4264 |
| YRI | CSH | 18642873 | 12.1799 | 13.445  | -0.2865 |
| YRI | CSH | 18647873 | 10.4162 | 12.2685 | -0.4574 |
| YRI | CSH | 18652873 | 8.4776  | 10.924  | -0.6738 |
| YRI | CSH | 18657873 | 8.9884  | 10.4199 | -0.4121 |
| YRI | CSH | 18662873 | 10.7591 | 11.5963 | -0.218  |
| YRI | CSH | 18667873 | 10.6263 | 11.9324 | -0.3311 |
| YRI | CSH | 18672873 | 11.1008 | 12.7727 | -0.3975 |
| YRI | CSH | 18677873 | 14.3724 | 13.7811 | 0.1308  |
| YRI | CSH | 18682873 | 16.6213 | 13.7811 | 0.6283  |
| YRI | CSH | 18687873 | 12.9507 | 12.6047 | 0.0833  |
| YRI | CSH | 18692873 | 8.6469  | 10.5879 | -0.5505 |
| YRI | CSH | 18697873 | 11.222  | 11.2602 | -0.0102 |
| YRI | CSH | 18702873 | 13.6571 | 12.7727 | 0.2103  |
| YRI | CSH | 18707873 | 10.5284 | 11.7644 | -0.3175 |
| YRI | CSH | 18712873 | 8.8529  | 10.924  | -0.5704 |
| YRI | CSH | 18717873 | 9.1671  | 11.7644 | -0.6673 |
| YRI | CSH | 18722873 | 9.3796  | 12.4366 | -0.7453 |
| YRI | CSH | 18727873 | 8.0025  | 10.756  | -0.7695 |
| YRI | CSH | 18732873 | 5.0366  | 9.0754  | -1.3221 |
| YRI | CSH | 18737873 | 7.7506  | 10.2518 | -0.731  |
| YRI | CSH | 18742873 | 7.0541  | 9.2434  | -0.7046 |
| YRI | CSH | 18747873 | 6.2103  | 10.2518 | -1.1812 |
| YRI | CSH | 18752873 | 9.3493  | 13.9492 | -1.006  |
| YRI | CSH | 18757873 | 11.8228 | 13.7811 | -0.4332 |
| YRI | CSH | 18762873 | 17.481  | 14.6214 | 0.598   |
| YRI | CSH | 18767873 | 20.0749 | 16.4701 | 0.6729  |
| YRI | CSH | 18772873 | 20.9489 | 16.9743 | 0.7209  |
| YRI | CSH | 18777873 | 17.412  | 16.134  | 0.2433  |
| YRI | CSH | 18782873 | 15.031  | 14.9575 | 0.015   |
| YRI | CSH | 18787873 | 16.9988 | 14.7895 | 0.457   |

## 2\_TajimasD\_data

|     |     |          |         |         |         |
|-----|-----|----------|---------|---------|---------|
| YRI | CSH | 18792873 | 16.6565 | 13.9492 | 0.5921  |
| YRI | CSH | 18797873 | 14.4161 | 13.1089 | 0.3032  |
| YRI | CSH | 18802873 | 12.287  | 13.9492 | -0.3635 |
| YRI | CSH | 18807873 | 12.6361 | 14.2853 | -0.3526 |
| YRI | CSH | 18812873 | 12.6828 | 11.7644 | 0.2359  |
| YRI | CSH | 18817873 | 12.5559 | 11.9324 | 0.1581  |
| YRI | CSH | 18822873 | 10.7969 | 12.9408 | -0.5034 |
| YRI | CSH | 18827873 | 8.1658  | 10.4199 | -0.6489 |
| YRI | CSH | 18832873 | 7.1977  | 10.2518 | -0.8926 |
| YRI | CSH | 18837873 | 8.208   | 10.756  | -0.712  |
| YRI | CSH | 18842873 | 13.3631 | 13.445  | -0.0185 |
| YRI | CSH | 18847873 | 14.2668 | 14.7895 | -0.1081 |
| YRI | CSH | 18852873 | 11.4687 | 14.2853 | -0.6022 |
| YRI | CSH | 18857873 | 11.9885 | 14.7895 | -0.5794 |
| CEU | CSH | 63377012 | 0       | 0       | 0       |
| CEU | CSH | 63382012 | 0       | 0       | 0       |
| CEU | CSH | 63387012 | 0       | 0       | 0       |
| CEU | CSH | 63392012 | 0       | 0       | 0       |
| CEU | CSH | 63397012 | 0       | 0       | 0       |
| CEU | CSH | 63402012 | 0       | 0       | 0       |
| CEU | CSH | 63407012 | 0       | 0       | 0       |
| CEU | CSH | 63412012 | 0       | 0       | 0       |
| CEU | CSH | 63417012 | 0       | 0       | 0       |
| CEU | CSH | 63422012 | 0       | 0       | 0       |
| CEU | CSH | 63427012 | 0       | 0       | 0       |
| CEU | CSH | 63432012 | 0       | 0       | 0       |
| CEU | CSH | 63437012 | 0       | 0       | 0       |
| CEU | CSH | 63442012 | 0       | 0       | 0       |
| CEU | CSH | 63447012 | 0       | 0       | 0       |
| CEU | CSH | 63452012 | 0       | 0       | 0       |
| CEU | CSH | 63457012 | 0       | 0       | 0       |
| CEU | CSH | 63462012 | 0       | 0       | 0       |
| CEU | CSH | 63467012 | 0       | 0       | 0       |
| CEU | CSH | 63472012 | 0       | 0       | 0       |
| CEU | CSH | 63477012 | 0       | 0       | 0       |
| CEU | CSH | 63482012 | 0       | 0       | 0       |
| CEU | CSH | 63487012 | 0       | 0       | 0       |
| CEU | CSH | 63492012 | 0       | 0       | 0       |
| CEU | CSH | 63497012 | 0       | 0       | 0       |
| CEU | CSH | 63502012 | 0       | 0       | 0       |
| CEU | CSH | 63507012 | 0       | 0       | 0       |
| CEU | CSH | 63512012 | 0       | 0       | 0       |
| CEU | CSH | 63517012 | 0       | 0       | 0       |
| CEU | CSH | 63522012 | 0       | 0       | 0       |
| CEU | CSH | 63527012 | 0       | 0       | 0       |
| CEU | CSH | 63532012 | 0       | 0       | 0       |
| CEU | CSH | 63537012 | 0       | 0       | 0       |
| CEU | CSH | 63542012 | 0       | 0       | 0       |
| CEU | CSH | 63547012 | 0       | 0       | 0       |

## 2\_TajimasD\_data

|     |     |          |   |   |   |
|-----|-----|----------|---|---|---|
| CEU | CSH | 63552012 | 0 | 0 | 0 |
| CEU | CSH | 63557012 | 0 | 0 | 0 |
| CEU | CSH | 63562012 | 0 | 0 | 0 |
| CEU | CSH | 63567012 | 0 | 0 | 0 |
| CEU | CSH | 63572012 | 0 | 0 | 0 |
| CEU | CSH | 63577012 | 0 | 0 | 0 |
| CEU | CSH | 63582012 | 0 | 0 | 0 |
| CEU | CSH | 63587012 | 0 | 0 | 0 |
| CEU | CSH | 63592012 | 0 | 0 | 0 |
| CEU | CSH | 63597012 | 0 | 0 | 0 |
| CEU | CSH | 63602012 | 0 | 0 | 0 |
| CEU | CSH | 63607012 | 0 | 0 | 0 |
| CEU | CSH | 63612012 | 0 | 0 | 0 |
| CEU | CSH | 63617012 | 0 | 0 | 0 |
| CEU | CSH | 63622012 | 0 | 0 | 0 |
| CEU | CSH | 63627012 | 0 | 0 | 0 |
| CEU | CSH | 63632012 | 0 | 0 | 0 |
| CEU | CSH | 63637012 | 0 | 0 | 0 |
| CEU | CSH | 63642012 | 0 | 0 | 0 |
| CEU | CSH | 63647012 | 0 | 0 | 0 |
| CEU | CSH | 63652012 | 0 | 0 | 0 |
| CEU | CSH | 63657012 | 0 | 0 | 0 |
| CEU | CSH | 63662012 | 0 | 0 | 0 |
| CEU | CSH | 63667012 | 0 | 0 | 0 |
| CEU | CSH | 63672012 | 0 | 0 | 0 |
| CEU | CSH | 63677012 | 0 | 0 | 0 |
| CEU | CSH | 63682012 | 0 | 0 | 0 |
| CEU | CSH | 63687012 | 0 | 0 | 0 |
| CEU | CSH | 63692012 | 0 | 0 | 0 |
| CEU | CSH | 63697012 | 0 | 0 | 0 |
| CEU | CSH | 63702012 | 0 | 0 | 0 |
| CEU | CSH | 63707012 | 0 | 0 | 0 |
| CEU | CSH | 63712012 | 0 | 0 | 0 |
| CEU | CSH | 63717012 | 0 | 0 | 0 |
| CEU | CSH | 63722012 | 0 | 0 | 0 |
| CEU | CSH | 63727012 | 0 | 0 | 0 |
| CEU | CSH | 63732012 | 0 | 0 | 0 |
| CEU | CSH | 63737012 | 0 | 0 | 0 |
| CEU | CSH | 63742012 | 0 | 0 | 0 |
| CEU | CSH | 63747012 | 0 | 0 | 0 |
| CEU | CSH | 63752012 | 0 | 0 | 0 |
| CEU | CSH | 63757012 | 0 | 0 | 0 |
| CEU | CSH | 63762012 | 0 | 0 | 0 |
| CEU | CSH | 63767012 | 0 | 0 | 0 |
| CEU | CSH | 63772012 | 0 | 0 | 0 |
| CEU | CSH | 63777012 | 0 | 0 | 0 |
| CEU | CSH | 63782012 | 0 | 0 | 0 |
| CEU | CSH | 63787012 | 0 | 0 | 0 |
| CEU | CSH | 63792012 | 0 | 0 | 0 |

## 2\_TajimasD\_data

|     |     |          |   |   |   |
|-----|-----|----------|---|---|---|
| CEU | CSH | 63797012 | 0 | 0 | 0 |
| CEU | CSH | 63802012 | 0 | 0 | 0 |
| CEU | CSH | 63807012 | 0 | 0 | 0 |
| CEU | CSH | 63812012 | 0 | 0 | 0 |
| CEU | CSH | 63817012 | 0 | 0 | 0 |
| CEU | CSH | 63822012 | 0 | 0 | 0 |
| CEU | CSH | 63827012 | 0 | 0 | 0 |
| CEU | CSH | 63832012 | 0 | 0 | 0 |
| CEU | CSH | 63837012 | 0 | 0 | 0 |
| CEU | CSH | 63842012 | 0 | 0 | 0 |
| CEU | CSH | 63847012 | 0 | 0 | 0 |
| CEU | CSH | 63852012 | 0 | 0 | 0 |
| CEU | CSH | 63857012 | 0 | 0 | 0 |
| CEU | CSH | 63862012 | 0 | 0 | 0 |
| CEU | CSH | 63867012 | 0 | 0 | 0 |
| CEU | CSH | 63872012 | 0 | 0 | 0 |
| CEU | CSH | 63877012 | 0 | 0 | 0 |
| CEU | CSH | 63882012 | 0 | 0 | 0 |
| CEU | CSH | 63887012 | 0 | 0 | 0 |
| CEU | CSH | 63892012 | 0 | 0 | 0 |
| CEU | CSH | 63897012 | 0 | 0 | 0 |
| CEU | CSH | 63902012 | 0 | 0 | 0 |
| CEU | CSH | 63907012 | 0 | 0 | 0 |
| CEU | CSH | 63912012 | 0 | 0 | 0 |
| CEU | CSH | 63917012 | 0 | 0 | 0 |
| CEU | CSH | 63922012 | 0 | 0 | 0 |
| CEU | CSH | 63927012 | 0 | 0 | 0 |
| CEU | CSH | 63932012 | 0 | 0 | 0 |
| CEU | CSH | 63937012 | 0 | 0 | 0 |
| CEU | CSH | 63942012 | 0 | 0 | 0 |
| CEU | CSH | 63947012 | 0 | 0 | 0 |
| CEU | CSH | 63952012 | 0 | 0 | 0 |
| CEU | CSH | 63957012 | 0 | 0 | 0 |
| CEU | CSH | 63962012 | 0 | 0 | 0 |
| CEU | CSH | 63967012 | 0 | 0 | 0 |
| CEU | CSH | 63972012 | 0 | 0 | 0 |
| CEU | CSH | 63977012 | 0 | 0 | 0 |
| CEU | CSH | 63982012 | 0 | 0 | 0 |
| CEU | CSH | 63987012 | 0 | 0 | 0 |
| CEU | CSH | 63992012 | 0 | 0 | 0 |
| CEU | CSH | 63997012 | 0 | 0 | 0 |
| CEU | CSH | 64002012 | 0 | 0 | 0 |
| CEU | CSH | 64007012 | 0 | 0 | 0 |
| CEU | CSH | 64012012 | 0 | 0 | 0 |
| CEU | CSH | 64017012 | 0 | 0 | 0 |
| CEU | CSH | 64022012 | 0 | 0 | 0 |
| CEU | CSH | 64027012 | 0 | 0 | 0 |
| CEU | CSH | 64032012 | 0 | 0 | 0 |
| CEU | CSH | 64037012 | 0 | 0 | 0 |

## 2\_TajimasD\_data

|     |     |          |   |   |   |
|-----|-----|----------|---|---|---|
| CEU | CSH | 64042012 | 0 | 0 | 0 |
| CEU | CSH | 64047012 | 0 | 0 | 0 |
| CEU | CSH | 64052012 | 0 | 0 | 0 |
| CEU | CSH | 64057012 | 0 | 0 | 0 |
| CEU | CSH | 64062012 | 0 | 0 | 0 |
| CEU | CSH | 64067012 | 0 | 0 | 0 |
| CEU | CSH | 64072012 | 0 | 0 | 0 |
| CEU | CSH | 64077012 | 0 | 0 | 0 |
| CEU | CSH | 64082012 | 0 | 0 | 0 |
| CEU | CSH | 64087012 | 0 | 0 | 0 |
| CEU | CSH | 64092012 | 0 | 0 | 0 |
| CEU | CSH | 64097012 | 0 | 0 | 0 |
| CEU | CSH | 64102012 | 0 | 0 | 0 |
| CEU | CSH | 64107012 | 0 | 0 | 0 |
| CEU | CSH | 64112012 | 0 | 0 | 0 |
| CEU | CSH | 64117012 | 0 | 0 | 0 |
| CEU | CSH | 64122012 | 0 | 0 | 0 |
| CEU | CSH | 64127012 | 0 | 0 | 0 |
| CEU | CSH | 64132012 | 0 | 0 | 0 |
| CEU | CSH | 64137012 | 0 | 0 | 0 |
| CEU | CSH | 64142012 | 0 | 0 | 0 |
| CEU | CSH | 64147012 | 0 | 0 | 0 |
| CEU | CSH | 64152012 | 0 | 0 | 0 |
| CEU | CSH | 64157012 | 0 | 0 | 0 |
| CEU | CSH | 64162012 | 0 | 0 | 0 |
| CEU | CSH | 64167012 | 0 | 0 | 0 |
| CEU | CSH | 64172012 | 0 | 0 | 0 |
| CEU | CSH | 64177012 | 0 | 0 | 0 |
| CEU | CSH | 64182012 | 0 | 0 | 0 |
| CEU | CSH | 64187012 | 0 | 0 | 0 |
| CEU | CSH | 64192012 | 0 | 0 | 0 |
| CEU | CSH | 64197012 | 0 | 0 | 0 |
| CEU | CSH | 64202012 | 0 | 0 | 0 |
| CEU | CSH | 64207012 | 0 | 0 | 0 |
| CEU | CSH | 64212012 | 0 | 0 | 0 |
| CEU | CSH | 64217012 | 0 | 0 | 0 |
| CEU | CSH | 64222012 | 0 | 0 | 0 |
| CEU | CSH | 64227012 | 0 | 0 | 0 |
| CEU | CSH | 64232012 | 0 | 0 | 0 |
| CEU | CSH | 64237012 | 0 | 0 | 0 |
| CEU | CSH | 64242012 | 0 | 0 | 0 |
| CEU | CSH | 64247012 | 0 | 0 | 0 |
| CEU | CSH | 64252012 | 0 | 0 | 0 |
| CEU | CSH | 64257012 | 0 | 0 | 0 |
| CEU | CSH | 64262012 | 0 | 0 | 0 |
| CEU | CSH | 64267012 | 0 | 0 | 0 |
| CEU | CSH | 64272012 | 0 | 0 | 0 |
| CEU | CSH | 64277012 | 0 | 0 | 0 |
| CEU | CSH | 64282012 | 0 | 0 | 0 |

## 2\_TajimasD\_data

|     |     |          |   |   |   |
|-----|-----|----------|---|---|---|
| CEU | CSH | 64287012 | 0 | 0 | 0 |
| CEU | CSH | 64292012 | 0 | 0 | 0 |
| CEU | CSH | 64297012 | 0 | 0 | 0 |
| CEU | CSH | 64302012 | 0 | 0 | 0 |
| CEU | CSH | 64307012 | 0 | 0 | 0 |
| CEU | CSH | 64312012 | 0 | 0 | 0 |
| CEU | CSH | 64317012 | 0 | 0 | 0 |
| CEU | CSH | 64322012 | 0 | 0 | 0 |
| CEU | CSH | 64327012 | 0 | 0 | 0 |
| CEU | CSH | 64332012 | 0 | 0 | 0 |
| CEU | CSH | 64337012 | 0 | 0 | 0 |
| CEU | CSH | 64342012 | 0 | 0 | 0 |
| CEU | CSH | 64347012 | 0 | 0 | 0 |
| CEU | CSH | 64352012 | 0 | 0 | 0 |
| CEU | CSH | 64357012 | 0 | 0 | 0 |
| CEU | CSH | 64362012 | 0 | 0 | 0 |
| CEU | CSH | 64367012 | 0 | 0 | 0 |
| CHB | CSH | 63377012 | 0 | 0 | 0 |
| CHB | CSH | 63382012 | 0 | 0 | 0 |
| CHB | CSH | 63387012 | 0 | 0 | 0 |
| CHB | CSH | 63392012 | 0 | 0 | 0 |
| CHB | CSH | 63397012 | 0 | 0 | 0 |
| CHB | CSH | 63402012 | 0 | 0 | 0 |
| CHB | CSH | 63407012 | 0 | 0 | 0 |
| CHB | CSH | 63412012 | 0 | 0 | 0 |
| CHB | CSH | 63417012 | 0 | 0 | 0 |
| CHB | CSH | 63422012 | 0 | 0 | 0 |
| CHB | CSH | 63427012 | 0 | 0 | 0 |
| CHB | CSH | 63432012 | 0 | 0 | 0 |
| CHB | CSH | 63437012 | 0 | 0 | 0 |
| CHB | CSH | 63442012 | 0 | 0 | 0 |
| CHB | CSH | 63447012 | 0 | 0 | 0 |
| CHB | CSH | 63452012 | 0 | 0 | 0 |
| CHB | CSH | 63457012 | 0 | 0 | 0 |
| CHB | CSH | 63462012 | 0 | 0 | 0 |
| CHB | CSH | 63467012 | 0 | 0 | 0 |
| CHB | CSH | 63472012 | 0 | 0 | 0 |
| CHB | CSH | 63477012 | 0 | 0 | 0 |
| CHB | CSH | 63482012 | 0 | 0 | 0 |
| CHB | CSH | 63487012 | 0 | 0 | 0 |
| CHB | CSH | 63492012 | 0 | 0 | 0 |
| CHB | CSH | 63497012 | 0 | 0 | 0 |
| CHB | CSH | 63502012 | 0 | 0 | 0 |
| CHB | CSH | 63507012 | 0 | 0 | 0 |
| CHB | CSH | 63512012 | 0 | 0 | 0 |
| CHB | CSH | 63517012 | 0 | 0 | 0 |
| CHB | CSH | 63522012 | 0 | 0 | 0 |
| CHB | CSH | 63527012 | 0 | 0 | 0 |
| CHB | CSH | 63532012 | 0 | 0 | 0 |

## 2\_TajimasD\_data

|     |     |          |   |   |   |
|-----|-----|----------|---|---|---|
| CHB | CSH | 63537012 | 0 | 0 | 0 |
| CHB | CSH | 63542012 | 0 | 0 | 0 |
| CHB | CSH | 63547012 | 0 | 0 | 0 |
| CHB | CSH | 63552012 | 0 | 0 | 0 |
| CHB | CSH | 63557012 | 0 | 0 | 0 |
| CHB | CSH | 63562012 | 0 | 0 | 0 |
| CHB | CSH | 63567012 | 0 | 0 | 0 |
| CHB | CSH | 63572012 | 0 | 0 | 0 |
| CHB | CSH | 63577012 | 0 | 0 | 0 |
| CHB | CSH | 63582012 | 0 | 0 | 0 |
| CHB | CSH | 63587012 | 0 | 0 | 0 |
| CHB | CSH | 63592012 | 0 | 0 | 0 |
| CHB | CSH | 63597012 | 0 | 0 | 0 |
| CHB | CSH | 63602012 | 0 | 0 | 0 |
| CHB | CSH | 63607012 | 0 | 0 | 0 |
| CHB | CSH | 63612012 | 0 | 0 | 0 |
| CHB | CSH | 63617012 | 0 | 0 | 0 |
| CHB | CSH | 63622012 | 0 | 0 | 0 |
| CHB | CSH | 63627012 | 0 | 0 | 0 |
| CHB | CSH | 63632012 | 0 | 0 | 0 |
| CHB | CSH | 63637012 | 0 | 0 | 0 |
| CHB | CSH | 63642012 | 0 | 0 | 0 |
| CHB | CSH | 63647012 | 0 | 0 | 0 |
| CHB | CSH | 63652012 | 0 | 0 | 0 |
| CHB | CSH | 63657012 | 0 | 0 | 0 |
| CHB | CSH | 63662012 | 0 | 0 | 0 |
| CHB | CSH | 63667012 | 0 | 0 | 0 |
| CHB | CSH | 63672012 | 0 | 0 | 0 |
| CHB | CSH | 63677012 | 0 | 0 | 0 |
| CHB | CSH | 63682012 | 0 | 0 | 0 |
| CHB | CSH | 63687012 | 0 | 0 | 0 |
| CHB | CSH | 63692012 | 0 | 0 | 0 |
| CHB | CSH | 63697012 | 0 | 0 | 0 |
| CHB | CSH | 63702012 | 0 | 0 | 0 |
| CHB | CSH | 63707012 | 0 | 0 | 0 |
| CHB | CSH | 63712012 | 0 | 0 | 0 |
| CHB | CSH | 63717012 | 0 | 0 | 0 |
| CHB | CSH | 63722012 | 0 | 0 | 0 |
| CHB | CSH | 63727012 | 0 | 0 | 0 |
| CHB | CSH | 63732012 | 0 | 0 | 0 |
| CHB | CSH | 63737012 | 0 | 0 | 0 |
| CHB | CSH | 63742012 | 0 | 0 | 0 |
| CHB | CSH | 63747012 | 0 | 0 | 0 |
| CHB | CSH | 63752012 | 0 | 0 | 0 |
| CHB | CSH | 63757012 | 0 | 0 | 0 |
| CHB | CSH | 63762012 | 0 | 0 | 0 |
| CHB | CSH | 63767012 | 0 | 0 | 0 |
| CHB | CSH | 63772012 | 0 | 0 | 0 |
| CHB | CSH | 63777012 | 0 | 0 | 0 |

## 2\_TajimasD\_data

|     |     |          |   |   |   |
|-----|-----|----------|---|---|---|
| CHB | CSH | 63782012 | 0 | 0 | 0 |
| CHB | CSH | 63787012 | 0 | 0 | 0 |
| CHB | CSH | 63792012 | 0 | 0 | 0 |
| CHB | CSH | 63797012 | 0 | 0 | 0 |
| CHB | CSH | 63802012 | 0 | 0 | 0 |
| CHB | CSH | 63807012 | 0 | 0 | 0 |
| CHB | CSH | 63812012 | 0 | 0 | 0 |
| CHB | CSH | 63817012 | 0 | 0 | 0 |
| CHB | CSH | 63822012 | 0 | 0 | 0 |
| CHB | CSH | 63827012 | 0 | 0 | 0 |
| CHB | CSH | 63832012 | 0 | 0 | 0 |
| CHB | CSH | 63837012 | 0 | 0 | 0 |
| CHB | CSH | 63842012 | 0 | 0 | 0 |
| CHB | CSH | 63847012 | 0 | 0 | 0 |
| CHB | CSH | 63852012 | 0 | 0 | 0 |
| CHB | CSH | 63857012 | 0 | 0 | 0 |
| CHB | CSH | 63862012 | 0 | 0 | 0 |
| CHB | CSH | 63867012 | 0 | 0 | 0 |
| CHB | CSH | 63872012 | 0 | 0 | 0 |
| CHB | CSH | 63877012 | 0 | 0 | 0 |
| CHB | CSH | 63882012 | 0 | 0 | 0 |
| CHB | CSH | 63887012 | 0 | 0 | 0 |
| CHB | CSH | 63892012 | 0 | 0 | 0 |
| CHB | CSH | 63897012 | 0 | 0 | 0 |
| CHB | CSH | 63902012 | 0 | 0 | 0 |
| CHB | CSH | 63907012 | 0 | 0 | 0 |
| CHB | CSH | 63912012 | 0 | 0 | 0 |
| CHB | CSH | 63917012 | 0 | 0 | 0 |
| CHB | CSH | 63922012 | 0 | 0 | 0 |
| CHB | CSH | 63927012 | 0 | 0 | 0 |
| CHB | CSH | 63932012 | 0 | 0 | 0 |
| CHB | CSH | 63937012 | 0 | 0 | 0 |
| CHB | CSH | 63942012 | 0 | 0 | 0 |
| CHB | CSH | 63947012 | 0 | 0 | 0 |
| CHB | CSH | 63952012 | 0 | 0 | 0 |
| CHB | CSH | 63957012 | 0 | 0 | 0 |
| CHB | CSH | 63962012 | 0 | 0 | 0 |
| CHB | CSH | 63967012 | 0 | 0 | 0 |
| CHB | CSH | 63972012 | 0 | 0 | 0 |
| CHB | CSH | 63977012 | 0 | 0 | 0 |
| CHB | CSH | 63982012 | 0 | 0 | 0 |
| CHB | CSH | 63987012 | 0 | 0 | 0 |
| CHB | CSH | 63992012 | 0 | 0 | 0 |
| CHB | CSH | 63997012 | 0 | 0 | 0 |
| CHB | CSH | 64002012 | 0 | 0 | 0 |
| CHB | CSH | 64007012 | 0 | 0 | 0 |
| CHB | CSH | 64012012 | 0 | 0 | 0 |
| CHB | CSH | 64017012 | 0 | 0 | 0 |
| CHB | CSH | 64022012 | 0 | 0 | 0 |



## 2\_TajimasD\_data

|     |     |          |   |   |   |
|-----|-----|----------|---|---|---|
| CHB | CSH | 64027012 | 0 | 0 | 0 |
| CHB | CSH | 64032012 | 0 | 0 | 0 |
| CHB | CSH | 64037012 | 0 | 0 | 0 |
| CHB | CSH | 64042012 | 0 | 0 | 0 |
| CHB | CSH | 64047012 | 0 | 0 | 0 |
| CHB | CSH | 64052012 | 0 | 0 | 0 |
| CHB | CSH | 64057012 | 0 | 0 | 0 |
| CHB | CSH | 64062012 | 0 | 0 | 0 |
| CHB | CSH | 64067012 | 0 | 0 | 0 |
| CHB | CSH | 64072012 | 0 | 0 | 0 |
| CHB | CSH | 64077012 | 0 | 0 | 0 |
| CHB | CSH | 64082012 | 0 | 0 | 0 |
| CHB | CSH | 64087012 | 0 | 0 | 0 |
| CHB | CSH | 64092012 | 0 | 0 | 0 |
| CHB | CSH | 64097012 | 0 | 0 | 0 |
| CHB | CSH | 64102012 | 0 | 0 | 0 |
| CHB | CSH | 64107012 | 0 | 0 | 0 |
| CHB | CSH | 64112012 | 0 | 0 | 0 |
| CHB | CSH | 64117012 | 0 | 0 | 0 |
| CHB | CSH | 64122012 | 0 | 0 | 0 |
| CHB | CSH | 64127012 | 0 | 0 | 0 |
| CHB | CSH | 64132012 | 0 | 0 | 0 |
| CHB | CSH | 64137012 | 0 | 0 | 0 |
| CHB | CSH | 64142012 | 0 | 0 | 0 |
| CHB | CSH | 64147012 | 0 | 0 | 0 |
| CHB | CSH | 64152012 | 0 | 0 | 0 |
| CHB | CSH | 64157012 | 0 | 0 | 0 |
| CHB | CSH | 64162012 | 0 | 0 | 0 |
| CHB | CSH | 64167012 | 0 | 0 | 0 |
| CHB | CSH | 64172012 | 0 | 0 | 0 |
| CHB | CSH | 64177012 | 0 | 0 | 0 |
| CHB | CSH | 64182012 | 0 | 0 | 0 |
| CHB | CSH | 64187012 | 0 | 0 | 0 |
| CHB | CSH | 64192012 | 0 | 0 | 0 |
| CHB | CSH | 64197012 | 0 | 0 | 0 |
| CHB | CSH | 64202012 | 0 | 0 | 0 |
| CHB | CSH | 64207012 | 0 | 0 | 0 |
| CHB | CSH | 64212012 | 0 | 0 | 0 |
| CHB | CSH | 64217012 | 0 | 0 | 0 |
| CHB | CSH | 64222012 | 0 | 0 | 0 |
| CHB | CSH | 64227012 | 0 | 0 | 0 |
| CHB | CSH | 64232012 | 0 | 0 | 0 |
| CHB | CSH | 64237012 | 0 | 0 | 0 |
| CHB | CSH | 64242012 | 0 | 0 | 0 |
| CHB | CSH | 64247012 | 0 | 0 | 0 |
| CHB | CSH | 64252012 | 0 | 0 | 0 |
| CHB | CSH | 64257012 | 0 | 0 | 0 |
| CHB | CSH | 64262012 | 0 | 0 | 0 |
| CHB | CSH | 64267012 | 0 | 0 | 0 |

## 2\_TajimasD\_data

|     |     |          |   |   |   |
|-----|-----|----------|---|---|---|
| CHB | CSH | 64272012 | 0 | 0 | 0 |
| CHB | CSH | 64277012 | 0 | 0 | 0 |
| CHB | CSH | 64282012 | 0 | 0 | 0 |
| CHB | CSH | 64287012 | 0 | 0 | 0 |
| CHB | CSH | 64292012 | 0 | 0 | 0 |
| CHB | CSH | 64297012 | 0 | 0 | 0 |
| CHB | CSH | 64302012 | 0 | 0 | 0 |
| CHB | CSH | 64307012 | 0 | 0 | 0 |
| CHB | CSH | 64312012 | 0 | 0 | 0 |
| CHB | CSH | 64317012 | 0 | 0 | 0 |
| CHB | CSH | 64322012 | 0 | 0 | 0 |
| CHB | CSH | 64327012 | 0 | 0 | 0 |
| CHB | CSH | 64332012 | 0 | 0 | 0 |
| CHB | CSH | 64337012 | 0 | 0 | 0 |
| CHB | CSH | 64342012 | 0 | 0 | 0 |
| CHB | CSH | 64347012 | 0 | 0 | 0 |
| CHB | CSH | 64352012 | 0 | 0 | 0 |
| CHB | CSH | 64357012 | 0 | 0 | 0 |
| CHB | CSH | 64362012 | 0 | 0 | 0 |
| CHB | CSH | 64367012 | 0 | 0 | 0 |
| YRI | CSH | 63377012 | 0 | 0 | 0 |
| YRI | CSH | 63382012 | 0 | 0 | 0 |
| YRI | CSH | 63387012 | 0 | 0 | 0 |
| YRI | CSH | 63392012 | 0 | 0 | 0 |
| YRI | CSH | 63397012 | 0 | 0 | 0 |
| YRI | CSH | 63402012 | 0 | 0 | 0 |
| YRI | CSH | 63407012 | 0 | 0 | 0 |
| YRI | CSH | 63412012 | 0 | 0 | 0 |
| YRI | CSH | 63417012 | 0 | 0 | 0 |
| YRI | CSH | 63422012 | 0 | 0 | 0 |
| YRI | CSH | 63427012 | 0 | 0 | 0 |
| YRI | CSH | 63432012 | 0 | 0 | 0 |
| YRI | CSH | 63437012 | 0 | 0 | 0 |
| YRI | CSH | 63442012 | 0 | 0 | 0 |
| YRI | CSH | 63447012 | 0 | 0 | 0 |
| YRI | CSH | 63452012 | 0 | 0 | 0 |
| YRI | CSH | 63457012 | 0 | 0 | 0 |
| YRI | CSH | 63462012 | 0 | 0 | 0 |
| YRI | CSH | 63467012 | 0 | 0 | 0 |
| YRI | CSH | 63472012 | 0 | 0 | 0 |
| YRI | CSH | 63477012 | 0 | 0 | 0 |
| YRI | CSH | 63482012 | 0 | 0 | 0 |
| YRI | CSH | 63487012 | 0 | 0 | 0 |
| YRI | CSH | 63492012 | 0 | 0 | 0 |
| YRI | CSH | 63497012 | 0 | 0 | 0 |
| YRI | CSH | 63502012 | 0 | 0 | 0 |
| YRI | CSH | 63507012 | 0 | 0 | 0 |
| YRI | CSH | 63512012 | 0 | 0 | 0 |
| YRI | CSH | 63517012 | 0 | 0 | 0 |

## 2\_TajimasD\_data

|     |     |          |   |   |   |
|-----|-----|----------|---|---|---|
| YRI | CSH | 63522012 | 0 | 0 | 0 |
| YRI | CSH | 63527012 | 0 | 0 | 0 |
| YRI | CSH | 63532012 | 0 | 0 | 0 |
| YRI | CSH | 63537012 | 0 | 0 | 0 |
| YRI | CSH | 63542012 | 0 | 0 | 0 |
| YRI | CSH | 63547012 | 0 | 0 | 0 |
| YRI | CSH | 63552012 | 0 | 0 | 0 |
| YRI | CSH | 63557012 | 0 | 0 | 0 |
| YRI | CSH | 63562012 | 0 | 0 | 0 |
| YRI | CSH | 63567012 | 0 | 0 | 0 |
| YRI | CSH | 63572012 | 0 | 0 | 0 |
| YRI | CSH | 63577012 | 0 | 0 | 0 |
| YRI | CSH | 63582012 | 0 | 0 | 0 |
| YRI | CSH | 63587012 | 0 | 0 | 0 |
| YRI | CSH | 63592012 | 0 | 0 | 0 |
| YRI | CSH | 63597012 | 0 | 0 | 0 |
| YRI | CSH | 63602012 | 0 | 0 | 0 |
| YRI | CSH | 63607012 | 0 | 0 | 0 |
| YRI | CSH | 63612012 | 0 | 0 | 0 |
| YRI | CSH | 63617012 | 0 | 0 | 0 |
| YRI | CSH | 63622012 | 0 | 0 | 0 |
| YRI | CSH | 63627012 | 0 | 0 | 0 |
| YRI | CSH | 63632012 | 0 | 0 | 0 |
| YRI | CSH | 63637012 | 0 | 0 | 0 |
| YRI | CSH | 63642012 | 0 | 0 | 0 |
| YRI | CSH | 63647012 | 0 | 0 | 0 |
| YRI | CSH | 63652012 | 0 | 0 | 0 |
| YRI | CSH | 63657012 | 0 | 0 | 0 |
| YRI | CSH | 63662012 | 0 | 0 | 0 |
| YRI | CSH | 63667012 | 0 | 0 | 0 |
| YRI | CSH | 63672012 | 0 | 0 | 0 |
| YRI | CSH | 63677012 | 0 | 0 | 0 |
| YRI | CSH | 63682012 | 0 | 0 | 0 |
| YRI | CSH | 63687012 | 0 | 0 | 0 |
| YRI | CSH | 63692012 | 0 | 0 | 0 |
| YRI | CSH | 63697012 | 0 | 0 | 0 |
| YRI | CSH | 63702012 | 0 | 0 | 0 |
| YRI | CSH | 63707012 | 0 | 0 | 0 |
| YRI | CSH | 63712012 | 0 | 0 | 0 |
| YRI | CSH | 63717012 | 0 | 0 | 0 |
| YRI | CSH | 63722012 | 0 | 0 | 0 |
| YRI | CSH | 63727012 | 0 | 0 | 0 |
| YRI | CSH | 63732012 | 0 | 0 | 0 |
| YRI | CSH | 63737012 | 0 | 0 | 0 |
| YRI | CSH | 63742012 | 0 | 0 | 0 |
| YRI | CSH | 63747012 | 0 | 0 | 0 |
| YRI | CSH | 63752012 | 0 | 0 | 0 |
| YRI | CSH | 63757012 | 0 | 0 | 0 |
| YRI | CSH | 63762012 | 0 | 0 | 0 |

## 2\_TajimasD\_data

|     |     |          |   |   |   |
|-----|-----|----------|---|---|---|
| YRI | CSH | 63767012 | 0 | 0 | 0 |
| YRI | CSH | 63772012 | 0 | 0 | 0 |
| YRI | CSH | 63777012 | 0 | 0 | 0 |
| YRI | CSH | 63782012 | 0 | 0 | 0 |
| YRI | CSH | 63787012 | 0 | 0 | 0 |
| YRI | CSH | 63792012 | 0 | 0 | 0 |
| YRI | CSH | 63797012 | 0 | 0 | 0 |
| YRI | CSH | 63802012 | 0 | 0 | 0 |
| YRI | CSH | 63807012 | 0 | 0 | 0 |
| YRI | CSH | 63812012 | 0 | 0 | 0 |
| YRI | CSH | 63817012 | 0 | 0 | 0 |
| YRI | CSH | 63822012 | 0 | 0 | 0 |
| YRI | CSH | 63827012 | 0 | 0 | 0 |
| YRI | CSH | 63832012 | 0 | 0 | 0 |
| YRI | CSH | 63837012 | 0 | 0 | 0 |
| YRI | CSH | 63842012 | 0 | 0 | 0 |
| YRI | CSH | 63847012 | 0 | 0 | 0 |
| YRI | CSH | 63852012 | 0 | 0 | 0 |
| YRI | CSH | 63857012 | 0 | 0 | 0 |
| YRI | CSH | 63862012 | 0 | 0 | 0 |
| YRI | CSH | 63867012 | 0 | 0 | 0 |
| YRI | CSH | 63872012 | 0 | 0 | 0 |
| YRI | CSH | 63877012 | 0 | 0 | 0 |
| YRI | CSH | 63882012 | 0 | 0 | 0 |
| YRI | CSH | 63887012 | 0 | 0 | 0 |
| YRI | CSH | 63892012 | 0 | 0 | 0 |
| YRI | CSH | 63897012 | 0 | 0 | 0 |
| YRI | CSH | 63902012 | 0 | 0 | 0 |
| YRI | CSH | 63907012 | 0 | 0 | 0 |
| YRI | CSH | 63912012 | 0 | 0 | 0 |
| YRI | CSH | 63917012 | 0 | 0 | 0 |
| YRI | CSH | 63922012 | 0 | 0 | 0 |
| YRI | CSH | 63927012 | 0 | 0 | 0 |
| YRI | CSH | 63932012 | 0 | 0 | 0 |
| YRI | CSH | 63937012 | 0 | 0 | 0 |
| YRI | CSH | 63942012 | 0 | 0 | 0 |
| YRI | CSH | 63947012 | 0 | 0 | 0 |
| YRI | CSH | 63952012 | 0 | 0 | 0 |
| YRI | CSH | 63957012 | 0 | 0 | 0 |
| YRI | CSH | 63962012 | 0 | 0 | 0 |
| YRI | CSH | 63967012 | 0 | 0 | 0 |
| YRI | CSH | 63972012 | 0 | 0 | 0 |
| YRI | CSH | 63977012 | 0 | 0 | 0 |
| YRI | CSH | 63982012 | 0 | 0 | 0 |
| YRI | CSH | 63987012 | 0 | 0 | 0 |
| YRI | CSH | 63992012 | 0 | 0 | 0 |
| YRI | CSH | 63997012 | 0 | 0 | 0 |
| YRI | CSH | 64002012 | 0 | 0 | 0 |
| YRI | CSH | 64007012 | 0 | 0 | 0 |

## 2\_TajimasD\_data

|     |     |          |   |   |   |
|-----|-----|----------|---|---|---|
| YRI | CSH | 64012012 | 0 | 0 | 0 |
| YRI | CSH | 64017012 | 0 | 0 | 0 |
| YRI | CSH | 64022012 | 0 | 0 | 0 |
| YRI | CSH | 64027012 | 0 | 0 | 0 |
| YRI | CSH | 64032012 | 0 | 0 | 0 |
| YRI | CSH | 64037012 | 0 | 0 | 0 |
| YRI | CSH | 64042012 | 0 | 0 | 0 |
| YRI | CSH | 64047012 | 0 | 0 | 0 |
| YRI | CSH | 64052012 | 0 | 0 | 0 |
| YRI | CSH | 64057012 | 0 | 0 | 0 |
| YRI | CSH | 64062012 | 0 | 0 | 0 |
| YRI | CSH | 64067012 | 0 | 0 | 0 |
| YRI | CSH | 64072012 | 0 | 0 | 0 |
| YRI | CSH | 64077012 | 0 | 0 | 0 |
| YRI | CSH | 64082012 | 0 | 0 | 0 |
| YRI | CSH | 64087012 | 0 | 0 | 0 |
| YRI | CSH | 64092012 | 0 | 0 | 0 |
| YRI | CSH | 64097012 | 0 | 0 | 0 |
| YRI | CSH | 64102012 | 0 | 0 | 0 |
| YRI | CSH | 64107012 | 0 | 0 | 0 |
| YRI | CSH | 64112012 | 0 | 0 | 0 |
| YRI | CSH | 64117012 | 0 | 0 | 0 |
| YRI | CSH | 64122012 | 0 | 0 | 0 |
| YRI | CSH | 64127012 | 0 | 0 | 0 |
| YRI | CSH | 64132012 | 0 | 0 | 0 |
| YRI | CSH | 64137012 | 0 | 0 | 0 |
| YRI | CSH | 64142012 | 0 | 0 | 0 |
| YRI | CSH | 64147012 | 0 | 0 | 0 |
| YRI | CSH | 64152012 | 0 | 0 | 0 |
| YRI | CSH | 64157012 | 0 | 0 | 0 |
| YRI | CSH | 64162012 | 0 | 0 | 0 |
| YRI | CSH | 64167012 | 0 | 0 | 0 |
| YRI | CSH | 64172012 | 0 | 0 | 0 |
| YRI | CSH | 64177012 | 0 | 0 | 0 |
| YRI | CSH | 64182012 | 0 | 0 | 0 |
| YRI | CSH | 64187012 | 0 | 0 | 0 |
| YRI | CSH | 64192012 | 0 | 0 | 0 |
| YRI | CSH | 64197012 | 0 | 0 | 0 |
| YRI | CSH | 64202012 | 0 | 0 | 0 |
| YRI | CSH | 64207012 | 0 | 0 | 0 |
| YRI | CSH | 64212012 | 0 | 0 | 0 |
| YRI | CSH | 64217012 | 0 | 0 | 0 |
| YRI | CSH | 64222012 | 0 | 0 | 0 |
| YRI | CSH | 64227012 | 0 | 0 | 0 |
| YRI | CSH | 64232012 | 0 | 0 | 0 |
| YRI | CSH | 64237012 | 0 | 0 | 0 |
| YRI | CSH | 64242012 | 0 | 0 | 0 |
| YRI | CSH | 64247012 | 0 | 0 | 0 |
| YRI | CSH | 64252012 | 0 | 0 | 0 |

## 2\_TajimasD\_data

|     |     |          |   |   |   |
|-----|-----|----------|---|---|---|
| YRI | CSH | 64257012 | 0 | 0 | 0 |
| YRI | CSH | 64262012 | 0 | 0 | 0 |
| YRI | CSH | 64267012 | 0 | 0 | 0 |
| YRI | CSH | 64272012 | 0 | 0 | 0 |
| YRI | CSH | 64277012 | 0 | 0 | 0 |
| YRI | CSH | 64282012 | 0 | 0 | 0 |
| YRI | CSH | 64287012 | 0 | 0 | 0 |
| YRI | CSH | 64292012 | 0 | 0 | 0 |
| YRI | CSH | 64297012 | 0 | 0 | 0 |
| YRI | CSH | 64302012 | 0 | 0 | 0 |
| YRI | CSH | 64307012 | 0 | 0 | 0 |
| YRI | CSH | 64312012 | 0 | 0 | 0 |
| YRI | CSH | 64317012 | 0 | 0 | 0 |
| YRI | CSH | 64322012 | 0 | 0 | 0 |
| YRI | CSH | 64327012 | 0 | 0 | 0 |
| YRI | CSH | 64332012 | 0 | 0 | 0 |
| YRI | CSH | 64337012 | 0 | 0 | 0 |
| YRI | CSH | 64342012 | 0 | 0 | 0 |
| YRI | CSH | 64347012 | 0 | 0 | 0 |
| YRI | CSH | 64352012 | 0 | 0 | 0 |
| YRI | CSH | 64357012 | 0 | 0 | 0 |
| YRI | CSH | 64362012 | 0 | 0 | 0 |
| YRI | CSH | 64367012 | 0 | 0 | 0 |
| CEU | CSH | 63399918 | 0 | 0 | 0 |
| CEU | CSH | 63404918 | 0 | 0 | 0 |
| CEU | CSH | 63409918 | 0 | 0 | 0 |
| CEU | CSH | 63414918 | 0 | 0 | 0 |
| CEU | CSH | 63419918 | 0 | 0 | 0 |
| CEU | CSH | 63424918 | 0 | 0 | 0 |
| CEU | CSH | 63429918 | 0 | 0 | 0 |
| CEU | CSH | 63434918 | 0 | 0 | 0 |
| CEU | CSH | 63439918 | 0 | 0 | 0 |
| CEU | CSH | 63444918 | 0 | 0 | 0 |
| CEU | CSH | 63449918 | 0 | 0 | 0 |
| CEU | CSH | 63454918 | 0 | 0 | 0 |
| CEU | CSH | 63459918 | 0 | 0 | 0 |
| CEU | CSH | 63464918 | 0 | 0 | 0 |
| CEU | CSH | 63469918 | 0 | 0 | 0 |
| CEU | CSH | 63474918 | 0 | 0 | 0 |
| CEU | CSH | 63479918 | 0 | 0 | 0 |
| CEU | CSH | 63484918 | 0 | 0 | 0 |
| CEU | CSH | 63489918 | 0 | 0 | 0 |
| CEU | CSH | 63494918 | 0 | 0 | 0 |
| CEU | CSH | 63499918 | 0 | 0 | 0 |
| CEU | CSH | 63504918 | 0 | 0 | 0 |
| CEU | CSH | 63509918 | 0 | 0 | 0 |
| CEU | CSH | 63514918 | 0 | 0 | 0 |
| CEU | CSH | 63519918 | 0 | 0 | 0 |
| CEU | CSH | 63524918 | 0 | 0 | 0 |

## 2\_TajimasD\_data

|     |     |          |   |   |   |
|-----|-----|----------|---|---|---|
| CEU | CSH | 63529918 | 0 | 0 | 0 |
| CEU | CSH | 63534918 | 0 | 0 | 0 |
| CEU | CSH | 63539918 | 0 | 0 | 0 |
| CEU | CSH | 63544918 | 0 | 0 | 0 |
| CEU | CSH | 63549918 | 0 | 0 | 0 |
| CEU | CSH | 63554918 | 0 | 0 | 0 |
| CEU | CSH | 63559918 | 0 | 0 | 0 |
| CEU | CSH | 63564918 | 0 | 0 | 0 |
| CEU | CSH | 63569918 | 0 | 0 | 0 |
| CEU | CSH | 63574918 | 0 | 0 | 0 |
| CEU | CSH | 63579918 | 0 | 0 | 0 |
| CEU | CSH | 63584918 | 0 | 0 | 0 |
| CEU | CSH | 63589918 | 0 | 0 | 0 |
| CEU | CSH | 63594918 | 0 | 0 | 0 |
| CEU | CSH | 63599918 | 0 | 0 | 0 |
| CEU | CSH | 63604918 | 0 | 0 | 0 |
| CEU | CSH | 63609918 | 0 | 0 | 0 |
| CEU | CSH | 63614918 | 0 | 0 | 0 |
| CEU | CSH | 63619918 | 0 | 0 | 0 |
| CEU | CSH | 63624918 | 0 | 0 | 0 |
| CEU | CSH | 63629918 | 0 | 0 | 0 |
| CEU | CSH | 63634918 | 0 | 0 | 0 |
| CEU | CSH | 63639918 | 0 | 0 | 0 |
| CEU | CSH | 63644918 | 0 | 0 | 0 |
| CEU | CSH | 63649918 | 0 | 0 | 0 |
| CEU | CSH | 63654918 | 0 | 0 | 0 |
| CEU | CSH | 63659918 | 0 | 0 | 0 |
| CEU | CSH | 63664918 | 0 | 0 | 0 |
| CEU | CSH | 63669918 | 0 | 0 | 0 |
| CEU | CSH | 63674918 | 0 | 0 | 0 |
| CEU | CSH | 63679918 | 0 | 0 | 0 |
| CEU | CSH | 63684918 | 0 | 0 | 0 |
| CEU | CSH | 63689918 | 0 | 0 | 0 |
| CEU | CSH | 63694918 | 0 | 0 | 0 |
| CEU | CSH | 63699918 | 0 | 0 | 0 |
| CEU | CSH | 63704918 | 0 | 0 | 0 |
| CEU | CSH | 63709918 | 0 | 0 | 0 |
| CEU | CSH | 63714918 | 0 | 0 | 0 |
| CEU | CSH | 63719918 | 0 | 0 | 0 |
| CEU | CSH | 63724918 | 0 | 0 | 0 |
| CEU | CSH | 63729918 | 0 | 0 | 0 |
| CEU | CSH | 63734918 | 0 | 0 | 0 |
| CEU | CSH | 63739918 | 0 | 0 | 0 |
| CEU | CSH | 63744918 | 0 | 0 | 0 |
| CEU | CSH | 63749918 | 0 | 0 | 0 |
| CEU | CSH | 63754918 | 0 | 0 | 0 |
| CEU | CSH | 63759918 | 0 | 0 | 0 |
| CEU | CSH | 63764918 | 0 | 0 | 0 |
| CEU | CSH | 63769918 | 0 | 0 | 0 |

## 2\_TajimasD\_data

|     |     |          |   |   |   |
|-----|-----|----------|---|---|---|
| CEU | CSH | 63774918 | 0 | 0 | 0 |
| CEU | CSH | 63779918 | 0 | 0 | 0 |
| CEU | CSH | 63784918 | 0 | 0 | 0 |
| CEU | CSH | 63789918 | 0 | 0 | 0 |
| CEU | CSH | 63794918 | 0 | 0 | 0 |
| CEU | CSH | 63799918 | 0 | 0 | 0 |
| CEU | CSH | 63804918 | 0 | 0 | 0 |
| CEU | CSH | 63809918 | 0 | 0 | 0 |
| CEU | CSH | 63814918 | 0 | 0 | 0 |
| CEU | CSH | 63819918 | 0 | 0 | 0 |
| CEU | CSH | 63824918 | 0 | 0 | 0 |
| CEU | CSH | 63829918 | 0 | 0 | 0 |
| CEU | CSH | 63834918 | 0 | 0 | 0 |
| CEU | CSH | 63839918 | 0 | 0 | 0 |
| CEU | CSH | 63844918 | 0 | 0 | 0 |
| CEU | CSH | 63849918 | 0 | 0 | 0 |
| CEU | CSH | 63854918 | 0 | 0 | 0 |
| CEU | CSH | 63859918 | 0 | 0 | 0 |
| CEU | CSH | 63864918 | 0 | 0 | 0 |
| CEU | CSH | 63869918 | 0 | 0 | 0 |
| CEU | CSH | 63874918 | 0 | 0 | 0 |
| CEU | CSH | 63879918 | 0 | 0 | 0 |
| CEU | CSH | 63884918 | 0 | 0 | 0 |
| CEU | CSH | 63889918 | 0 | 0 | 0 |
| CEU | CSH | 63894918 | 0 | 0 | 0 |
| CEU | CSH | 63899918 | 0 | 0 | 0 |
| CEU | CSH | 63904918 | 0 | 0 | 0 |
| CEU | CSH | 63909918 | 0 | 0 | 0 |
| CEU | CSH | 63914918 | 0 | 0 | 0 |
| CEU | CSH | 63919918 | 0 | 0 | 0 |
| CEU | CSH | 63924918 | 0 | 0 | 0 |
| CEU | CSH | 63929918 | 0 | 0 | 0 |
| CEU | CSH | 63934918 | 0 | 0 | 0 |
| CEU | CSH | 63939918 | 0 | 0 | 0 |
| CEU | CSH | 63944918 | 0 | 0 | 0 |
| CEU | CSH | 63949918 | 0 | 0 | 0 |
| CEU | CSH | 63954918 | 0 | 0 | 0 |
| CEU | CSH | 63959918 | 0 | 0 | 0 |
| CEU | CSH | 63964918 | 0 | 0 | 0 |
| CEU | CSH | 63969918 | 0 | 0 | 0 |
| CEU | CSH | 63974918 | 0 | 0 | 0 |
| CEU | CSH | 63979918 | 0 | 0 | 0 |
| CEU | CSH | 63984918 | 0 | 0 | 0 |
| CEU | CSH | 63989918 | 0 | 0 | 0 |
| CEU | CSH | 63994918 | 0 | 0 | 0 |
| CEU | CSH | 63999918 | 0 | 0 | 0 |
| CEU | CSH | 64004918 | 0 | 0 | 0 |
| CEU | CSH | 64009918 | 0 | 0 | 0 |
| CEU | CSH | 64014918 | 0 | 0 | 0 |



## 2\_TajimasD\_data

|     |     |          |   |   |   |
|-----|-----|----------|---|---|---|
| CEU | CSH | 64019918 | 0 | 0 | 0 |
| CEU | CSH | 64024918 | 0 | 0 | 0 |
| CEU | CSH | 64029918 | 0 | 0 | 0 |
| CEU | CSH | 64034918 | 0 | 0 | 0 |
| CEU | CSH | 64039918 | 0 | 0 | 0 |
| CEU | CSH | 64044918 | 0 | 0 | 0 |
| CEU | CSH | 64049918 | 0 | 0 | 0 |
| CEU | CSH | 64054918 | 0 | 0 | 0 |
| CEU | CSH | 64059918 | 0 | 0 | 0 |
| CEU | CSH | 64064918 | 0 | 0 | 0 |
| CEU | CSH | 64069918 | 0 | 0 | 0 |
| CEU | CSH | 64074918 | 0 | 0 | 0 |
| CEU | CSH | 64079918 | 0 | 0 | 0 |
| CEU | CSH | 64084918 | 0 | 0 | 0 |
| CEU | CSH | 64089918 | 0 | 0 | 0 |
| CEU | CSH | 64094918 | 0 | 0 | 0 |
| CEU | CSH | 64099918 | 0 | 0 | 0 |
| CEU | CSH | 64104918 | 0 | 0 | 0 |
| CEU | CSH | 64109918 | 0 | 0 | 0 |
| CEU | CSH | 64114918 | 0 | 0 | 0 |
| CEU | CSH | 64119918 | 0 | 0 | 0 |
| CEU | CSH | 64124918 | 0 | 0 | 0 |
| CEU | CSH | 64129918 | 0 | 0 | 0 |
| CEU | CSH | 64134918 | 0 | 0 | 0 |
| CEU | CSH | 64139918 | 0 | 0 | 0 |
| CEU | CSH | 64144918 | 0 | 0 | 0 |
| CEU | CSH | 64149918 | 0 | 0 | 0 |
| CEU | CSH | 64154918 | 0 | 0 | 0 |
| CEU | CSH | 64159918 | 0 | 0 | 0 |
| CEU | CSH | 64164918 | 0 | 0 | 0 |
| CEU | CSH | 64169918 | 0 | 0 | 0 |
| CEU | CSH | 64174918 | 0 | 0 | 0 |
| CEU | CSH | 64179918 | 0 | 0 | 0 |
| CEU | CSH | 64184918 | 0 | 0 | 0 |
| CEU | CSH | 64189918 | 0 | 0 | 0 |
| CEU | CSH | 64194918 | 0 | 0 | 0 |
| CEU | CSH | 64199918 | 0 | 0 | 0 |
| CEU | CSH | 64204918 | 0 | 0 | 0 |
| CEU | CSH | 64209918 | 0 | 0 | 0 |
| CEU | CSH | 64214918 | 0 | 0 | 0 |
| CEU | CSH | 64219918 | 0 | 0 | 0 |
| CEU | CSH | 64224918 | 0 | 0 | 0 |
| CEU | CSH | 64229918 | 0 | 0 | 0 |
| CEU | CSH | 64234918 | 0 | 0 | 0 |
| CEU | CSH | 64239918 | 0 | 0 | 0 |
| CEU | CSH | 64244918 | 0 | 0 | 0 |
| CEU | CSH | 64249918 | 0 | 0 | 0 |
| CEU | CSH | 64254918 | 0 | 0 | 0 |
| CEU | CSH | 64259918 | 0 | 0 | 0 |

## 2\_TajimasD\_data

|     |     |          |   |   |   |
|-----|-----|----------|---|---|---|
| CEU | CSH | 64264918 | 0 | 0 | 0 |
| CEU | CSH | 64269918 | 0 | 0 | 0 |
| CEU | CSH | 64274918 | 0 | 0 | 0 |
| CEU | CSH | 64279918 | 0 | 0 | 0 |
| CEU | CSH | 64284918 | 0 | 0 | 0 |
| CEU | CSH | 64289918 | 0 | 0 | 0 |
| CEU | CSH | 64294918 | 0 | 0 | 0 |
| CEU | CSH | 64299918 | 0 | 0 | 0 |
| CEU | CSH | 64304918 | 0 | 0 | 0 |
| CEU | CSH | 64309918 | 0 | 0 | 0 |
| CEU | CSH | 64314918 | 0 | 0 | 0 |
| CEU | CSH | 64319918 | 0 | 0 | 0 |
| CEU | CSH | 64324918 | 0 | 0 | 0 |
| CEU | CSH | 64329918 | 0 | 0 | 0 |
| CEU | CSH | 64334918 | 0 | 0 | 0 |
| CEU | CSH | 64339918 | 0 | 0 | 0 |
| CEU | CSH | 64344918 | 0 | 0 | 0 |
| CEU | CSH | 64349918 | 0 | 0 | 0 |
| CEU | CSH | 64354918 | 0 | 0 | 0 |
| CEU | CSH | 64359918 | 0 | 0 | 0 |
| CEU | CSH | 64364918 | 0 | 0 | 0 |
| CEU | CSH | 64369918 | 0 | 0 | 0 |
| CEU | CSH | 64374918 | 0 | 0 | 0 |
| CEU | CSH | 64379918 | 0 | 0 | 0 |
| CEU | CSH | 64384918 | 0 | 0 | 0 |
| CEU | CSH | 64389918 | 0 | 0 | 0 |
| CHB | CSH | 63399918 | 0 | 0 | 0 |
| CHB | CSH | 63404918 | 0 | 0 | 0 |
| CHB | CSH | 63409918 | 0 | 0 | 0 |
| CHB | CSH | 63414918 | 0 | 0 | 0 |
| CHB | CSH | 63419918 | 0 | 0 | 0 |
| CHB | CSH | 63424918 | 0 | 0 | 0 |
| CHB | CSH | 63429918 | 0 | 0 | 0 |
| CHB | CSH | 63434918 | 0 | 0 | 0 |
| CHB | CSH | 63439918 | 0 | 0 | 0 |
| CHB | CSH | 63444918 | 0 | 0 | 0 |
| CHB | CSH | 63449918 | 0 | 0 | 0 |
| CHB | CSH | 63454918 | 0 | 0 | 0 |
| CHB | CSH | 63459918 | 0 | 0 | 0 |
| CHB | CSH | 63464918 | 0 | 0 | 0 |
| CHB | CSH | 63469918 | 0 | 0 | 0 |
| CHB | CSH | 63474918 | 0 | 0 | 0 |
| CHB | CSH | 63479918 | 0 | 0 | 0 |
| CHB | CSH | 63484918 | 0 | 0 | 0 |
| CHB | CSH | 63489918 | 0 | 0 | 0 |
| CHB | CSH | 63494918 | 0 | 0 | 0 |
| CHB | CSH | 63499918 | 0 | 0 | 0 |
| CHB | CSH | 63504918 | 0 | 0 | 0 |
| CHB | CSH | 63509918 | 0 | 0 | 0 |

## 2\_TajimasD\_data

|     |     |          |   |   |   |
|-----|-----|----------|---|---|---|
| CHB | CSH | 63514918 | 0 | 0 | 0 |
| CHB | CSH | 63519918 | 0 | 0 | 0 |
| CHB | CSH | 63524918 | 0 | 0 | 0 |
| CHB | CSH | 63529918 | 0 | 0 | 0 |
| CHB | CSH | 63534918 | 0 | 0 | 0 |
| CHB | CSH | 63539918 | 0 | 0 | 0 |
| CHB | CSH | 63544918 | 0 | 0 | 0 |
| CHB | CSH | 63549918 | 0 | 0 | 0 |
| CHB | CSH | 63554918 | 0 | 0 | 0 |
| CHB | CSH | 63559918 | 0 | 0 | 0 |
| CHB | CSH | 63564918 | 0 | 0 | 0 |
| CHB | CSH | 63569918 | 0 | 0 | 0 |
| CHB | CSH | 63574918 | 0 | 0 | 0 |
| CHB | CSH | 63579918 | 0 | 0 | 0 |
| CHB | CSH | 63584918 | 0 | 0 | 0 |
| CHB | CSH | 63589918 | 0 | 0 | 0 |
| CHB | CSH | 63594918 | 0 | 0 | 0 |
| CHB | CSH | 63599918 | 0 | 0 | 0 |
| CHB | CSH | 63604918 | 0 | 0 | 0 |
| CHB | CSH | 63609918 | 0 | 0 | 0 |
| CHB | CSH | 63614918 | 0 | 0 | 0 |
| CHB | CSH | 63619918 | 0 | 0 | 0 |
| CHB | CSH | 63624918 | 0 | 0 | 0 |
| CHB | CSH | 63629918 | 0 | 0 | 0 |
| CHB | CSH | 63634918 | 0 | 0 | 0 |
| CHB | CSH | 63639918 | 0 | 0 | 0 |
| CHB | CSH | 63644918 | 0 | 0 | 0 |
| CHB | CSH | 63649918 | 0 | 0 | 0 |
| CHB | CSH | 63654918 | 0 | 0 | 0 |
| CHB | CSH | 63659918 | 0 | 0 | 0 |
| CHB | CSH | 63664918 | 0 | 0 | 0 |
| CHB | CSH | 63669918 | 0 | 0 | 0 |
| CHB | CSH | 63674918 | 0 | 0 | 0 |
| CHB | CSH | 63679918 | 0 | 0 | 0 |
| CHB | CSH | 63684918 | 0 | 0 | 0 |
| CHB | CSH | 63689918 | 0 | 0 | 0 |
| CHB | CSH | 63694918 | 0 | 0 | 0 |
| CHB | CSH | 63699918 | 0 | 0 | 0 |
| CHB | CSH | 63704918 | 0 | 0 | 0 |
| CHB | CSH | 63709918 | 0 | 0 | 0 |
| CHB | CSH | 63714918 | 0 | 0 | 0 |
| CHB | CSH | 63719918 | 0 | 0 | 0 |
| CHB | CSH | 63724918 | 0 | 0 | 0 |
| CHB | CSH | 63729918 | 0 | 0 | 0 |
| CHB | CSH | 63734918 | 0 | 0 | 0 |
| CHB | CSH | 63739918 | 0 | 0 | 0 |
| CHB | CSH | 63744918 | 0 | 0 | 0 |
| CHB | CSH | 63749918 | 0 | 0 | 0 |
| CHB | CSH | 63754918 | 0 | 0 | 0 |

## 2\_TajimasD\_data

|     |     |          |   |   |   |
|-----|-----|----------|---|---|---|
| CHB | CSH | 63759918 | 0 | 0 | 0 |
| CHB | CSH | 63764918 | 0 | 0 | 0 |
| CHB | CSH | 63769918 | 0 | 0 | 0 |
| CHB | CSH | 63774918 | 0 | 0 | 0 |
| CHB | CSH | 63779918 | 0 | 0 | 0 |
| CHB | CSH | 63784918 | 0 | 0 | 0 |
| CHB | CSH | 63789918 | 0 | 0 | 0 |
| CHB | CSH | 63794918 | 0 | 0 | 0 |
| CHB | CSH | 63799918 | 0 | 0 | 0 |
| CHB | CSH | 63804918 | 0 | 0 | 0 |
| CHB | CSH | 63809918 | 0 | 0 | 0 |
| CHB | CSH | 63814918 | 0 | 0 | 0 |
| CHB | CSH | 63819918 | 0 | 0 | 0 |
| CHB | CSH | 63824918 | 0 | 0 | 0 |
| CHB | CSH | 63829918 | 0 | 0 | 0 |
| CHB | CSH | 63834918 | 0 | 0 | 0 |
| CHB | CSH | 63839918 | 0 | 0 | 0 |
| CHB | CSH | 63844918 | 0 | 0 | 0 |
| CHB | CSH | 63849918 | 0 | 0 | 0 |
| CHB | CSH | 63854918 | 0 | 0 | 0 |
| CHB | CSH | 63859918 | 0 | 0 | 0 |
| CHB | CSH | 63864918 | 0 | 0 | 0 |
| CHB | CSH | 63869918 | 0 | 0 | 0 |
| CHB | CSH | 63874918 | 0 | 0 | 0 |
| CHB | CSH | 63879918 | 0 | 0 | 0 |
| CHB | CSH | 63884918 | 0 | 0 | 0 |
| CHB | CSH | 63889918 | 0 | 0 | 0 |
| CHB | CSH | 63894918 | 0 | 0 | 0 |
| CHB | CSH | 63899918 | 0 | 0 | 0 |
| CHB | CSH | 63904918 | 0 | 0 | 0 |
| CHB | CSH | 63909918 | 0 | 0 | 0 |
| CHB | CSH | 63914918 | 0 | 0 | 0 |
| CHB | CSH | 63919918 | 0 | 0 | 0 |
| CHB | CSH | 63924918 | 0 | 0 | 0 |
| CHB | CSH | 63929918 | 0 | 0 | 0 |
| CHB | CSH | 63934918 | 0 | 0 | 0 |
| CHB | CSH | 63939918 | 0 | 0 | 0 |
| CHB | CSH | 63944918 | 0 | 0 | 0 |
| CHB | CSH | 63949918 | 0 | 0 | 0 |
| CHB | CSH | 63954918 | 0 | 0 | 0 |
| CHB | CSH | 63959918 | 0 | 0 | 0 |
| CHB | CSH | 63964918 | 0 | 0 | 0 |
| CHB | CSH | 63969918 | 0 | 0 | 0 |
| CHB | CSH | 63974918 | 0 | 0 | 0 |
| CHB | CSH | 63979918 | 0 | 0 | 0 |
| CHB | CSH | 63984918 | 0 | 0 | 0 |
| CHB | CSH | 63989918 | 0 | 0 | 0 |
| CHB | CSH | 63994918 | 0 | 0 | 0 |
| CHB | CSH | 63999918 | 0 | 0 | 0 |

## 2\_TajimasD\_data

|     |     |          |   |   |   |
|-----|-----|----------|---|---|---|
| CHB | CSH | 64004918 | 0 | 0 | 0 |
| CHB | CSH | 64009918 | 0 | 0 | 0 |
| CHB | CSH | 64014918 | 0 | 0 | 0 |
| CHB | CSH | 64019918 | 0 | 0 | 0 |
| CHB | CSH | 64024918 | 0 | 0 | 0 |
| CHB | CSH | 64029918 | 0 | 0 | 0 |
| CHB | CSH | 64034918 | 0 | 0 | 0 |
| CHB | CSH | 64039918 | 0 | 0 | 0 |
| CHB | CSH | 64044918 | 0 | 0 | 0 |
| CHB | CSH | 64049918 | 0 | 0 | 0 |
| CHB | CSH | 64054918 | 0 | 0 | 0 |
| CHB | CSH | 64059918 | 0 | 0 | 0 |
| CHB | CSH | 64064918 | 0 | 0 | 0 |
| CHB | CSH | 64069918 | 0 | 0 | 0 |
| CHB | CSH | 64074918 | 0 | 0 | 0 |
| CHB | CSH | 64079918 | 0 | 0 | 0 |
| CHB | CSH | 64084918 | 0 | 0 | 0 |
| CHB | CSH | 64089918 | 0 | 0 | 0 |
| CHB | CSH | 64094918 | 0 | 0 | 0 |
| CHB | CSH | 64099918 | 0 | 0 | 0 |
| CHB | CSH | 64104918 | 0 | 0 | 0 |
| CHB | CSH | 64109918 | 0 | 0 | 0 |
| CHB | CSH | 64114918 | 0 | 0 | 0 |
| CHB | CSH | 64119918 | 0 | 0 | 0 |
| CHB | CSH | 64124918 | 0 | 0 | 0 |
| CHB | CSH | 64129918 | 0 | 0 | 0 |
| CHB | CSH | 64134918 | 0 | 0 | 0 |
| CHB | CSH | 64139918 | 0 | 0 | 0 |
| CHB | CSH | 64144918 | 0 | 0 | 0 |
| CHB | CSH | 64149918 | 0 | 0 | 0 |
| CHB | CSH | 64154918 | 0 | 0 | 0 |
| CHB | CSH | 64159918 | 0 | 0 | 0 |
| CHB | CSH | 64164918 | 0 | 0 | 0 |
| CHB | CSH | 64169918 | 0 | 0 | 0 |
| CHB | CSH | 64174918 | 0 | 0 | 0 |
| CHB | CSH | 64179918 | 0 | 0 | 0 |
| CHB | CSH | 64184918 | 0 | 0 | 0 |
| CHB | CSH | 64189918 | 0 | 0 | 0 |
| CHB | CSH | 64194918 | 0 | 0 | 0 |
| CHB | CSH | 64199918 | 0 | 0 | 0 |
| CHB | CSH | 64204918 | 0 | 0 | 0 |
| CHB | CSH | 64209918 | 0 | 0 | 0 |
| CHB | CSH | 64214918 | 0 | 0 | 0 |
| CHB | CSH | 64219918 | 0 | 0 | 0 |
| CHB | CSH | 64224918 | 0 | 0 | 0 |
| CHB | CSH | 64229918 | 0 | 0 | 0 |
| CHB | CSH | 64234918 | 0 | 0 | 0 |
| CHB | CSH | 64239918 | 0 | 0 | 0 |
| CHB | CSH | 64244918 | 0 | 0 | 0 |

## 2\_TajimasD\_data

|     |     |          |   |   |   |
|-----|-----|----------|---|---|---|
| CHB | CSH | 64249918 | 0 | 0 | 0 |
| CHB | CSH | 64254918 | 0 | 0 | 0 |
| CHB | CSH | 64259918 | 0 | 0 | 0 |
| CHB | CSH | 64264918 | 0 | 0 | 0 |
| CHB | CSH | 64269918 | 0 | 0 | 0 |
| CHB | CSH | 64274918 | 0 | 0 | 0 |
| CHB | CSH | 64279918 | 0 | 0 | 0 |
| CHB | CSH | 64284918 | 0 | 0 | 0 |
| CHB | CSH | 64289918 | 0 | 0 | 0 |
| CHB | CSH | 64294918 | 0 | 0 | 0 |
| CHB | CSH | 64299918 | 0 | 0 | 0 |
| CHB | CSH | 64304918 | 0 | 0 | 0 |
| CHB | CSH | 64309918 | 0 | 0 | 0 |
| CHB | CSH | 64314918 | 0 | 0 | 0 |
| CHB | CSH | 64319918 | 0 | 0 | 0 |
| CHB | CSH | 64324918 | 0 | 0 | 0 |
| CHB | CSH | 64329918 | 0 | 0 | 0 |
| CHB | CSH | 64334918 | 0 | 0 | 0 |
| CHB | CSH | 64339918 | 0 | 0 | 0 |
| CHB | CSH | 64344918 | 0 | 0 | 0 |
| CHB | CSH | 64349918 | 0 | 0 | 0 |
| CHB | CSH | 64354918 | 0 | 0 | 0 |
| CHB | CSH | 64359918 | 0 | 0 | 0 |
| CHB | CSH | 64364918 | 0 | 0 | 0 |
| CHB | CSH | 64369918 | 0 | 0 | 0 |
| CHB | CSH | 64374918 | 0 | 0 | 0 |
| CHB | CSH | 64379918 | 0 | 0 | 0 |
| CHB | CSH | 64384918 | 0 | 0 | 0 |
| CHB | CSH | 64389918 | 0 | 0 | 0 |
| YRI | CSH | 63399918 | 0 | 0 | 0 |
| YRI | CSH | 63404918 | 0 | 0 | 0 |
| YRI | CSH | 63409918 | 0 | 0 | 0 |
| YRI | CSH | 63414918 | 0 | 0 | 0 |
| YRI | CSH | 63419918 | 0 | 0 | 0 |
| YRI | CSH | 63424918 | 0 | 0 | 0 |
| YRI | CSH | 63429918 | 0 | 0 | 0 |
| YRI | CSH | 63434918 | 0 | 0 | 0 |
| YRI | CSH | 63439918 | 0 | 0 | 0 |
| YRI | CSH | 63444918 | 0 | 0 | 0 |
| YRI | CSH | 63449918 | 0 | 0 | 0 |
| YRI | CSH | 63454918 | 0 | 0 | 0 |
| YRI | CSH | 63459918 | 0 | 0 | 0 |
| YRI | CSH | 63464918 | 0 | 0 | 0 |
| YRI | CSH | 63469918 | 0 | 0 | 0 |
| YRI | CSH | 63474918 | 0 | 0 | 0 |
| YRI | CSH | 63479918 | 0 | 0 | 0 |
| YRI | CSH | 63484918 | 0 | 0 | 0 |
| YRI | CSH | 63489918 | 0 | 0 | 0 |
| YRI | CSH | 63494918 | 0 | 0 | 0 |

## 2\_TajimasD\_data

|     |     |          |   |   |   |
|-----|-----|----------|---|---|---|
| YRI | CSH | 63499918 | 0 | 0 | 0 |
| YRI | CSH | 63504918 | 0 | 0 | 0 |
| YRI | CSH | 63509918 | 0 | 0 | 0 |
| YRI | CSH | 63514918 | 0 | 0 | 0 |
| YRI | CSH | 63519918 | 0 | 0 | 0 |
| YRI | CSH | 63524918 | 0 | 0 | 0 |
| YRI | CSH | 63529918 | 0 | 0 | 0 |
| YRI | CSH | 63534918 | 0 | 0 | 0 |
| YRI | CSH | 63539918 | 0 | 0 | 0 |
| YRI | CSH | 63544918 | 0 | 0 | 0 |
| YRI | CSH | 63549918 | 0 | 0 | 0 |
| YRI | CSH | 63554918 | 0 | 0 | 0 |
| YRI | CSH | 63559918 | 0 | 0 | 0 |
| YRI | CSH | 63564918 | 0 | 0 | 0 |
| YRI | CSH | 63569918 | 0 | 0 | 0 |
| YRI | CSH | 63574918 | 0 | 0 | 0 |
| YRI | CSH | 63579918 | 0 | 0 | 0 |
| YRI | CSH | 63584918 | 0 | 0 | 0 |
| YRI | CSH | 63589918 | 0 | 0 | 0 |
| YRI | CSH | 63594918 | 0 | 0 | 0 |
| YRI | CSH | 63599918 | 0 | 0 | 0 |
| YRI | CSH | 63604918 | 0 | 0 | 0 |
| YRI | CSH | 63609918 | 0 | 0 | 0 |
| YRI | CSH | 63614918 | 0 | 0 | 0 |
| YRI | CSH | 63619918 | 0 | 0 | 0 |
| YRI | CSH | 63624918 | 0 | 0 | 0 |
| YRI | CSH | 63629918 | 0 | 0 | 0 |
| YRI | CSH | 63634918 | 0 | 0 | 0 |
| YRI | CSH | 63639918 | 0 | 0 | 0 |
| YRI | CSH | 63644918 | 0 | 0 | 0 |
| YRI | CSH | 63649918 | 0 | 0 | 0 |
| YRI | CSH | 63654918 | 0 | 0 | 0 |
| YRI | CSH | 63659918 | 0 | 0 | 0 |
| YRI | CSH | 63664918 | 0 | 0 | 0 |
| YRI | CSH | 63669918 | 0 | 0 | 0 |
| YRI | CSH | 63674918 | 0 | 0 | 0 |
| YRI | CSH | 63679918 | 0 | 0 | 0 |
| YRI | CSH | 63684918 | 0 | 0 | 0 |
| YRI | CSH | 63689918 | 0 | 0 | 0 |
| YRI | CSH | 63694918 | 0 | 0 | 0 |
| YRI | CSH | 63699918 | 0 | 0 | 0 |
| YRI | CSH | 63704918 | 0 | 0 | 0 |
| YRI | CSH | 63709918 | 0 | 0 | 0 |
| YRI | CSH | 63714918 | 0 | 0 | 0 |
| YRI | CSH | 63719918 | 0 | 0 | 0 |
| YRI | CSH | 63724918 | 0 | 0 | 0 |
| YRI | CSH | 63729918 | 0 | 0 | 0 |
| YRI | CSH | 63734918 | 0 | 0 | 0 |
| YRI | CSH | 63739918 | 0 | 0 | 0 |

## 2\_TajimasD\_data

|     |     |          |   |   |   |
|-----|-----|----------|---|---|---|
| YRI | CSH | 63744918 | 0 | 0 | 0 |
| YRI | CSH | 63749918 | 0 | 0 | 0 |
| YRI | CSH | 63754918 | 0 | 0 | 0 |
| YRI | CSH | 63759918 | 0 | 0 | 0 |
| YRI | CSH | 63764918 | 0 | 0 | 0 |
| YRI | CSH | 63769918 | 0 | 0 | 0 |
| YRI | CSH | 63774918 | 0 | 0 | 0 |
| YRI | CSH | 63779918 | 0 | 0 | 0 |
| YRI | CSH | 63784918 | 0 | 0 | 0 |
| YRI | CSH | 63789918 | 0 | 0 | 0 |
| YRI | CSH | 63794918 | 0 | 0 | 0 |
| YRI | CSH | 63799918 | 0 | 0 | 0 |
| YRI | CSH | 63804918 | 0 | 0 | 0 |
| YRI | CSH | 63809918 | 0 | 0 | 0 |
| YRI | CSH | 63814918 | 0 | 0 | 0 |
| YRI | CSH | 63819918 | 0 | 0 | 0 |
| YRI | CSH | 63824918 | 0 | 0 | 0 |
| YRI | CSH | 63829918 | 0 | 0 | 0 |
| YRI | CSH | 63834918 | 0 | 0 | 0 |
| YRI | CSH | 63839918 | 0 | 0 | 0 |
| YRI | CSH | 63844918 | 0 | 0 | 0 |
| YRI | CSH | 63849918 | 0 | 0 | 0 |
| YRI | CSH | 63854918 | 0 | 0 | 0 |
| YRI | CSH | 63859918 | 0 | 0 | 0 |
| YRI | CSH | 63864918 | 0 | 0 | 0 |
| YRI | CSH | 63869918 | 0 | 0 | 0 |
| YRI | CSH | 63874918 | 0 | 0 | 0 |
| YRI | CSH | 63879918 | 0 | 0 | 0 |
| YRI | CSH | 63884918 | 0 | 0 | 0 |
| YRI | CSH | 63889918 | 0 | 0 | 0 |
| YRI | CSH | 63894918 | 0 | 0 | 0 |
| YRI | CSH | 63899918 | 0 | 0 | 0 |
| YRI | CSH | 63904918 | 0 | 0 | 0 |
| YRI | CSH | 63909918 | 0 | 0 | 0 |
| YRI | CSH | 63914918 | 0 | 0 | 0 |
| YRI | CSH | 63919918 | 0 | 0 | 0 |
| YRI | CSH | 63924918 | 0 | 0 | 0 |
| YRI | CSH | 63929918 | 0 | 0 | 0 |
| YRI | CSH | 63934918 | 0 | 0 | 0 |
| YRI | CSH | 63939918 | 0 | 0 | 0 |
| YRI | CSH | 63944918 | 0 | 0 | 0 |
| YRI | CSH | 63949918 | 0 | 0 | 0 |
| YRI | CSH | 63954918 | 0 | 0 | 0 |
| YRI | CSH | 63959918 | 0 | 0 | 0 |
| YRI | CSH | 63964918 | 0 | 0 | 0 |
| YRI | CSH | 63969918 | 0 | 0 | 0 |
| YRI | CSH | 63974918 | 0 | 0 | 0 |
| YRI | CSH | 63979918 | 0 | 0 | 0 |
| YRI | CSH | 63984918 | 0 | 0 | 0 |



## 2\_TajimasD\_data

|     |     |          |   |   |   |
|-----|-----|----------|---|---|---|
| YRI | CSH | 63989918 | 0 | 0 | 0 |
| YRI | CSH | 63994918 | 0 | 0 | 0 |
| YRI | CSH | 63999918 | 0 | 0 | 0 |
| YRI | CSH | 64004918 | 0 | 0 | 0 |
| YRI | CSH | 64009918 | 0 | 0 | 0 |
| YRI | CSH | 64014918 | 0 | 0 | 0 |
| YRI | CSH | 64019918 | 0 | 0 | 0 |
| YRI | CSH | 64024918 | 0 | 0 | 0 |
| YRI | CSH | 64029918 | 0 | 0 | 0 |
| YRI | CSH | 64034918 | 0 | 0 | 0 |
| YRI | CSH | 64039918 | 0 | 0 | 0 |
| YRI | CSH | 64044918 | 0 | 0 | 0 |
| YRI | CSH | 64049918 | 0 | 0 | 0 |
| YRI | CSH | 64054918 | 0 | 0 | 0 |
| YRI | CSH | 64059918 | 0 | 0 | 0 |
| YRI | CSH | 64064918 | 0 | 0 | 0 |
| YRI | CSH | 64069918 | 0 | 0 | 0 |
| YRI | CSH | 64074918 | 0 | 0 | 0 |
| YRI | CSH | 64079918 | 0 | 0 | 0 |
| YRI | CSH | 64084918 | 0 | 0 | 0 |
| YRI | CSH | 64089918 | 0 | 0 | 0 |
| YRI | CSH | 64094918 | 0 | 0 | 0 |
| YRI | CSH | 64099918 | 0 | 0 | 0 |
| YRI | CSH | 64104918 | 0 | 0 | 0 |
| YRI | CSH | 64109918 | 0 | 0 | 0 |
| YRI | CSH | 64114918 | 0 | 0 | 0 |
| YRI | CSH | 64119918 | 0 | 0 | 0 |
| YRI | CSH | 64124918 | 0 | 0 | 0 |
| YRI | CSH | 64129918 | 0 | 0 | 0 |
| YRI | CSH | 64134918 | 0 | 0 | 0 |
| YRI | CSH | 64139918 | 0 | 0 | 0 |
| YRI | CSH | 64144918 | 0 | 0 | 0 |
| YRI | CSH | 64149918 | 0 | 0 | 0 |
| YRI | CSH | 64154918 | 0 | 0 | 0 |
| YRI | CSH | 64159918 | 0 | 0 | 0 |
| YRI | CSH | 64164918 | 0 | 0 | 0 |
| YRI | CSH | 64169918 | 0 | 0 | 0 |
| YRI | CSH | 64174918 | 0 | 0 | 0 |
| YRI | CSH | 64179918 | 0 | 0 | 0 |
| YRI | CSH | 64184918 | 0 | 0 | 0 |
| YRI | CSH | 64189918 | 0 | 0 | 0 |
| YRI | CSH | 64194918 | 0 | 0 | 0 |
| YRI | CSH | 64199918 | 0 | 0 | 0 |
| YRI | CSH | 64204918 | 0 | 0 | 0 |
| YRI | CSH | 64209918 | 0 | 0 | 0 |
| YRI | CSH | 64214918 | 0 | 0 | 0 |
| YRI | CSH | 64219918 | 0 | 0 | 0 |
| YRI | CSH | 64224918 | 0 | 0 | 0 |
| YRI | CSH | 64229918 | 0 | 0 | 0 |

## 2\_TajimasD\_data

|     |     |          |   |   |   |
|-----|-----|----------|---|---|---|
| YRI | CSH | 64234918 | 0 | 0 | 0 |
| YRI | CSH | 64239918 | 0 | 0 | 0 |
| YRI | CSH | 64244918 | 0 | 0 | 0 |
| YRI | CSH | 64249918 | 0 | 0 | 0 |
| YRI | CSH | 64254918 | 0 | 0 | 0 |
| YRI | CSH | 64259918 | 0 | 0 | 0 |
| YRI | CSH | 64264918 | 0 | 0 | 0 |
| YRI | CSH | 64269918 | 0 | 0 | 0 |
| YRI | CSH | 64274918 | 0 | 0 | 0 |
| YRI | CSH | 64279918 | 0 | 0 | 0 |
| YRI | CSH | 64284918 | 0 | 0 | 0 |
| YRI | CSH | 64289918 | 0 | 0 | 0 |
| YRI | CSH | 64294918 | 0 | 0 | 0 |
| YRI | CSH | 64299918 | 0 | 0 | 0 |
| YRI | CSH | 64304918 | 0 | 0 | 0 |
| YRI | CSH | 64309918 | 0 | 0 | 0 |
| YRI | CSH | 64314918 | 0 | 0 | 0 |
| YRI | CSH | 64319918 | 0 | 0 | 0 |
| YRI | CSH | 64324918 | 0 | 0 | 0 |
| YRI | CSH | 64329918 | 0 | 0 | 0 |
| YRI | CSH | 64334918 | 0 | 0 | 0 |
| YRI | CSH | 64339918 | 0 | 0 | 0 |
| YRI | CSH | 64344918 | 0 | 0 | 0 |
| YRI | CSH | 64349918 | 0 | 0 | 0 |
| YRI | CSH | 64354918 | 0 | 0 | 0 |
| YRI | CSH | 64359918 | 0 | 0 | 0 |
| YRI | CSH | 64364918 | 0 | 0 | 0 |
| YRI | CSH | 64369918 | 0 | 0 | 0 |
| YRI | CSH | 64374918 | 0 | 0 | 0 |
| YRI | CSH | 64379918 | 0 | 0 | 0 |
| YRI | CSH | 64384918 | 0 | 0 | 0 |
| YRI | CSH | 64389918 | 0 | 0 | 0 |
| CEU | CSH | 63414602 | 0 | 0 | 0 |
| CEU | CSH | 63419602 | 0 | 0 | 0 |
| CEU | CSH | 63424602 | 0 | 0 | 0 |
| CEU | CSH | 63429602 | 0 | 0 | 0 |
| CEU | CSH | 63434602 | 0 | 0 | 0 |
| CEU | CSH | 63439602 | 0 | 0 | 0 |
| CEU | CSH | 63444602 | 0 | 0 | 0 |
| CEU | CSH | 63449602 | 0 | 0 | 0 |
| CEU | CSH | 63454602 | 0 | 0 | 0 |
| CEU | CSH | 63459602 | 0 | 0 | 0 |
| CEU | CSH | 63464602 | 0 | 0 | 0 |
| CEU | CSH | 63469602 | 0 | 0 | 0 |
| CEU | CSH | 63474602 | 0 | 0 | 0 |
| CEU | CSH | 63479602 | 0 | 0 | 0 |
| CEU | CSH | 63484602 | 0 | 0 | 0 |
| CEU | CSH | 63489602 | 0 | 0 | 0 |
| CEU | CSH | 63494602 | 0 | 0 | 0 |

## 2\_TajimasD\_data

|     |     |          |   |   |   |
|-----|-----|----------|---|---|---|
| CEU | CSH | 63499602 | 0 | 0 | 0 |
| CEU | CSH | 63504602 | 0 | 0 | 0 |
| CEU | CSH | 63509602 | 0 | 0 | 0 |
| CEU | CSH | 63514602 | 0 | 0 | 0 |
| CEU | CSH | 63519602 | 0 | 0 | 0 |
| CEU | CSH | 63524602 | 0 | 0 | 0 |
| CEU | CSH | 63529602 | 0 | 0 | 0 |
| CEU | CSH | 63534602 | 0 | 0 | 0 |
| CEU | CSH | 63539602 | 0 | 0 | 0 |
| CEU | CSH | 63544602 | 0 | 0 | 0 |
| CEU | CSH | 63549602 | 0 | 0 | 0 |
| CEU | CSH | 63554602 | 0 | 0 | 0 |
| CEU | CSH | 63559602 | 0 | 0 | 0 |
| CEU | CSH | 63564602 | 0 | 0 | 0 |
| CEU | CSH | 63569602 | 0 | 0 | 0 |
| CEU | CSH | 63574602 | 0 | 0 | 0 |
| CEU | CSH | 63579602 | 0 | 0 | 0 |
| CEU | CSH | 63584602 | 0 | 0 | 0 |
| CEU | CSH | 63589602 | 0 | 0 | 0 |
| CEU | CSH | 63594602 | 0 | 0 | 0 |
| CEU | CSH | 63599602 | 0 | 0 | 0 |
| CEU | CSH | 63604602 | 0 | 0 | 0 |
| CEU | CSH | 63609602 | 0 | 0 | 0 |
| CEU | CSH | 63614602 | 0 | 0 | 0 |
| CEU | CSH | 63619602 | 0 | 0 | 0 |
| CEU | CSH | 63624602 | 0 | 0 | 0 |
| CEU | CSH | 63629602 | 0 | 0 | 0 |
| CEU | CSH | 63634602 | 0 | 0 | 0 |
| CEU | CSH | 63639602 | 0 | 0 | 0 |
| CEU | CSH | 63644602 | 0 | 0 | 0 |
| CEU | CSH | 63649602 | 0 | 0 | 0 |
| CEU | CSH | 63654602 | 0 | 0 | 0 |
| CEU | CSH | 63659602 | 0 | 0 | 0 |
| CEU | CSH | 63664602 | 0 | 0 | 0 |
| CEU | CSH | 63669602 | 0 | 0 | 0 |
| CEU | CSH | 63674602 | 0 | 0 | 0 |
| CEU | CSH | 63679602 | 0 | 0 | 0 |
| CEU | CSH | 63684602 | 0 | 0 | 0 |
| CEU | CSH | 63689602 | 0 | 0 | 0 |
| CEU | CSH | 63694602 | 0 | 0 | 0 |
| CEU | CSH | 63699602 | 0 | 0 | 0 |
| CEU | CSH | 63704602 | 0 | 0 | 0 |
| CEU | CSH | 63709602 | 0 | 0 | 0 |
| CEU | CSH | 63714602 | 0 | 0 | 0 |
| CEU | CSH | 63719602 | 0 | 0 | 0 |
| CEU | CSH | 63724602 | 0 | 0 | 0 |
| CEU | CSH | 63729602 | 0 | 0 | 0 |
| CEU | CSH | 63734602 | 0 | 0 | 0 |
| CEU | CSH | 63739602 | 0 | 0 | 0 |

## 2\_TajimasD\_data

|     |     |          |   |   |   |
|-----|-----|----------|---|---|---|
| CEU | CSH | 63744602 | 0 | 0 | 0 |
| CEU | CSH | 63749602 | 0 | 0 | 0 |
| CEU | CSH | 63754602 | 0 | 0 | 0 |
| CEU | CSH | 63759602 | 0 | 0 | 0 |
| CEU | CSH | 63764602 | 0 | 0 | 0 |
| CEU | CSH | 63769602 | 0 | 0 | 0 |
| CEU | CSH | 63774602 | 0 | 0 | 0 |
| CEU | CSH | 63779602 | 0 | 0 | 0 |
| CEU | CSH | 63784602 | 0 | 0 | 0 |
| CEU | CSH | 63789602 | 0 | 0 | 0 |
| CEU | CSH | 63794602 | 0 | 0 | 0 |
| CEU | CSH | 63799602 | 0 | 0 | 0 |
| CEU | CSH | 63804602 | 0 | 0 | 0 |
| CEU | CSH | 63809602 | 0 | 0 | 0 |
| CEU | CSH | 63814602 | 0 | 0 | 0 |
| CEU | CSH | 63819602 | 0 | 0 | 0 |
| CEU | CSH | 63824602 | 0 | 0 | 0 |
| CEU | CSH | 63829602 | 0 | 0 | 0 |
| CEU | CSH | 63834602 | 0 | 0 | 0 |
| CEU | CSH | 63839602 | 0 | 0 | 0 |
| CEU | CSH | 63844602 | 0 | 0 | 0 |
| CEU | CSH | 63849602 | 0 | 0 | 0 |
| CEU | CSH | 63854602 | 0 | 0 | 0 |
| CEU | CSH | 63859602 | 0 | 0 | 0 |
| CEU | CSH | 63864602 | 0 | 0 | 0 |
| CEU | CSH | 63869602 | 0 | 0 | 0 |
| CEU | CSH | 63874602 | 0 | 0 | 0 |
| CEU | CSH | 63879602 | 0 | 0 | 0 |
| CEU | CSH | 63884602 | 0 | 0 | 0 |
| CEU | CSH | 63889602 | 0 | 0 | 0 |
| CEU | CSH | 63894602 | 0 | 0 | 0 |
| CEU | CSH | 63899602 | 0 | 0 | 0 |
| CEU | CSH | 63904602 | 0 | 0 | 0 |
| CEU | CSH | 63909602 | 0 | 0 | 0 |
| CEU | CSH | 63914602 | 0 | 0 | 0 |
| CEU | CSH | 63919602 | 0 | 0 | 0 |
| CEU | CSH | 63924602 | 0 | 0 | 0 |
| CEU | CSH | 63929602 | 0 | 0 | 0 |
| CEU | CSH | 63934602 | 0 | 0 | 0 |
| CEU | CSH | 63939602 | 0 | 0 | 0 |
| CEU | CSH | 63944602 | 0 | 0 | 0 |
| CEU | CSH | 63949602 | 0 | 0 | 0 |
| CEU | CSH | 63954602 | 0 | 0 | 0 |
| CEU | CSH | 63959602 | 0 | 0 | 0 |
| CEU | CSH | 63964602 | 0 | 0 | 0 |
| CEU | CSH | 63969602 | 0 | 0 | 0 |
| CEU | CSH | 63974602 | 0 | 0 | 0 |
| CEU | CSH | 63979602 | 0 | 0 | 0 |
| CEU | CSH | 63984602 | 0 | 0 | 0 |

## 2\_TajimasD\_data

|     |     |          |   |   |   |
|-----|-----|----------|---|---|---|
| CEU | CSH | 63989602 | 0 | 0 | 0 |
| CEU | CSH | 63994602 | 0 | 0 | 0 |
| CEU | CSH | 63999602 | 0 | 0 | 0 |
| CEU | CSH | 64004602 | 0 | 0 | 0 |
| CEU | CSH | 64009602 | 0 | 0 | 0 |
| CEU | CSH | 64014602 | 0 | 0 | 0 |
| CEU | CSH | 64019602 | 0 | 0 | 0 |
| CEU | CSH | 64024602 | 0 | 0 | 0 |
| CEU | CSH | 64029602 | 0 | 0 | 0 |
| CEU | CSH | 64034602 | 0 | 0 | 0 |
| CEU | CSH | 64039602 | 0 | 0 | 0 |
| CEU | CSH | 64044602 | 0 | 0 | 0 |
| CEU | CSH | 64049602 | 0 | 0 | 0 |
| CEU | CSH | 64054602 | 0 | 0 | 0 |
| CEU | CSH | 64059602 | 0 | 0 | 0 |
| CEU | CSH | 64064602 | 0 | 0 | 0 |
| CEU | CSH | 64069602 | 0 | 0 | 0 |
| CEU | CSH | 64074602 | 0 | 0 | 0 |
| CEU | CSH | 64079602 | 0 | 0 | 0 |
| CEU | CSH | 64084602 | 0 | 0 | 0 |
| CEU | CSH | 64089602 | 0 | 0 | 0 |
| CEU | CSH | 64094602 | 0 | 0 | 0 |
| CEU | CSH | 64099602 | 0 | 0 | 0 |
| CEU | CSH | 64104602 | 0 | 0 | 0 |
| CEU | CSH | 64109602 | 0 | 0 | 0 |
| CEU | CSH | 64114602 | 0 | 0 | 0 |
| CEU | CSH | 64119602 | 0 | 0 | 0 |
| CEU | CSH | 64124602 | 0 | 0 | 0 |
| CEU | CSH | 64129602 | 0 | 0 | 0 |
| CEU | CSH | 64134602 | 0 | 0 | 0 |
| CEU | CSH | 64139602 | 0 | 0 | 0 |
| CEU | CSH | 64144602 | 0 | 0 | 0 |
| CEU | CSH | 64149602 | 0 | 0 | 0 |
| CEU | CSH | 64154602 | 0 | 0 | 0 |
| CEU | CSH | 64159602 | 0 | 0 | 0 |
| CEU | CSH | 64164602 | 0 | 0 | 0 |
| CEU | CSH | 64169602 | 0 | 0 | 0 |
| CEU | CSH | 64174602 | 0 | 0 | 0 |
| CEU | CSH | 64179602 | 0 | 0 | 0 |
| CEU | CSH | 64184602 | 0 | 0 | 0 |
| CEU | CSH | 64189602 | 0 | 0 | 0 |
| CEU | CSH | 64194602 | 0 | 0 | 0 |
| CEU | CSH | 64199602 | 0 | 0 | 0 |
| CEU | CSH | 64204602 | 0 | 0 | 0 |
| CEU | CSH | 64209602 | 0 | 0 | 0 |
| CEU | CSH | 64214602 | 0 | 0 | 0 |
| CEU | CSH | 64219602 | 0 | 0 | 0 |
| CEU | CSH | 64224602 | 0 | 0 | 0 |
| CEU | CSH | 64229602 | 0 | 0 | 0 |

## 2\_TajimasD\_data

|     |     |          |   |   |   |
|-----|-----|----------|---|---|---|
| CEU | CSH | 64234602 | 0 | 0 | 0 |
| CEU | CSH | 64239602 | 0 | 0 | 0 |
| CEU | CSH | 64244602 | 0 | 0 | 0 |
| CEU | CSH | 64249602 | 0 | 0 | 0 |
| CEU | CSH | 64254602 | 0 | 0 | 0 |
| CEU | CSH | 64259602 | 0 | 0 | 0 |
| CEU | CSH | 64264602 | 0 | 0 | 0 |
| CEU | CSH | 64269602 | 0 | 0 | 0 |
| CEU | CSH | 64274602 | 0 | 0 | 0 |
| CEU | CSH | 64279602 | 0 | 0 | 0 |
| CEU | CSH | 64284602 | 0 | 0 | 0 |
| CEU | CSH | 64289602 | 0 | 0 | 0 |
| CEU | CSH | 64294602 | 0 | 0 | 0 |
| CEU | CSH | 64299602 | 0 | 0 | 0 |
| CEU | CSH | 64304602 | 0 | 0 | 0 |
| CEU | CSH | 64309602 | 0 | 0 | 0 |
| CEU | CSH | 64314602 | 0 | 0 | 0 |
| CEU | CSH | 64319602 | 0 | 0 | 0 |
| CEU | CSH | 64324602 | 0 | 0 | 0 |
| CEU | CSH | 64329602 | 0 | 0 | 0 |
| CEU | CSH | 64334602 | 0 | 0 | 0 |
| CEU | CSH | 64339602 | 0 | 0 | 0 |
| CEU | CSH | 64344602 | 0 | 0 | 0 |
| CEU | CSH | 64349602 | 0 | 0 | 0 |
| CEU | CSH | 64354602 | 0 | 0 | 0 |
| CEU | CSH | 64359602 | 0 | 0 | 0 |
| CEU | CSH | 64364602 | 0 | 0 | 0 |
| CEU | CSH | 64369602 | 0 | 0 | 0 |
| CEU | CSH | 64374602 | 0 | 0 | 0 |
| CEU | CSH | 64379602 | 0 | 0 | 0 |
| CEU | CSH | 64384602 | 0 | 0 | 0 |
| CEU | CSH | 64389602 | 0 | 0 | 0 |
| CEU | CSH | 64394602 | 0 | 0 | 0 |
| CEU | CSH | 64399602 | 0 | 0 | 0 |
| CEU | CSH | 64404602 | 0 | 0 | 0 |
| CHB | CSH | 63414602 | 0 | 0 | 0 |
| CHB | CSH | 63419602 | 0 | 0 | 0 |
| CHB | CSH | 63424602 | 0 | 0 | 0 |
| CHB | CSH | 63429602 | 0 | 0 | 0 |
| CHB | CSH | 63434602 | 0 | 0 | 0 |
| CHB | CSH | 63439602 | 0 | 0 | 0 |
| CHB | CSH | 63444602 | 0 | 0 | 0 |
| CHB | CSH | 63449602 | 0 | 0 | 0 |
| CHB | CSH | 63454602 | 0 | 0 | 0 |
| CHB | CSH | 63459602 | 0 | 0 | 0 |
| CHB | CSH | 63464602 | 0 | 0 | 0 |
| CHB | CSH | 63469602 | 0 | 0 | 0 |
| CHB | CSH | 63474602 | 0 | 0 | 0 |
| CHB | CSH | 63479602 | 0 | 0 | 0 |

## 2\_TajimasD\_data

|     |     |          |   |   |   |
|-----|-----|----------|---|---|---|
| CHB | CSH | 63484602 | 0 | 0 | 0 |
| CHB | CSH | 63489602 | 0 | 0 | 0 |
| CHB | CSH | 63494602 | 0 | 0 | 0 |
| CHB | CSH | 63499602 | 0 | 0 | 0 |
| CHB | CSH | 63504602 | 0 | 0 | 0 |
| CHB | CSH | 63509602 | 0 | 0 | 0 |
| CHB | CSH | 63514602 | 0 | 0 | 0 |
| CHB | CSH | 63519602 | 0 | 0 | 0 |
| CHB | CSH | 63524602 | 0 | 0 | 0 |
| CHB | CSH | 63529602 | 0 | 0 | 0 |
| CHB | CSH | 63534602 | 0 | 0 | 0 |
| CHB | CSH | 63539602 | 0 | 0 | 0 |
| CHB | CSH | 63544602 | 0 | 0 | 0 |
| CHB | CSH | 63549602 | 0 | 0 | 0 |
| CHB | CSH | 63554602 | 0 | 0 | 0 |
| CHB | CSH | 63559602 | 0 | 0 | 0 |
| CHB | CSH | 63564602 | 0 | 0 | 0 |
| CHB | CSH | 63569602 | 0 | 0 | 0 |
| CHB | CSH | 63574602 | 0 | 0 | 0 |
| CHB | CSH | 63579602 | 0 | 0 | 0 |
| CHB | CSH | 63584602 | 0 | 0 | 0 |
| CHB | CSH | 63589602 | 0 | 0 | 0 |
| CHB | CSH | 63594602 | 0 | 0 | 0 |
| CHB | CSH | 63599602 | 0 | 0 | 0 |
| CHB | CSH | 63604602 | 0 | 0 | 0 |
| CHB | CSH | 63609602 | 0 | 0 | 0 |
| CHB | CSH | 63614602 | 0 | 0 | 0 |
| CHB | CSH | 63619602 | 0 | 0 | 0 |
| CHB | CSH | 63624602 | 0 | 0 | 0 |
| CHB | CSH | 63629602 | 0 | 0 | 0 |
| CHB | CSH | 63634602 | 0 | 0 | 0 |
| CHB | CSH | 63639602 | 0 | 0 | 0 |
| CHB | CSH | 63644602 | 0 | 0 | 0 |
| CHB | CSH | 63649602 | 0 | 0 | 0 |
| CHB | CSH | 63654602 | 0 | 0 | 0 |
| CHB | CSH | 63659602 | 0 | 0 | 0 |
| CHB | CSH | 63664602 | 0 | 0 | 0 |
| CHB | CSH | 63669602 | 0 | 0 | 0 |
| CHB | CSH | 63674602 | 0 | 0 | 0 |
| CHB | CSH | 63679602 | 0 | 0 | 0 |
| CHB | CSH | 63684602 | 0 | 0 | 0 |
| CHB | CSH | 63689602 | 0 | 0 | 0 |
| CHB | CSH | 63694602 | 0 | 0 | 0 |
| CHB | CSH | 63699602 | 0 | 0 | 0 |
| CHB | CSH | 63704602 | 0 | 0 | 0 |
| CHB | CSH | 63709602 | 0 | 0 | 0 |
| CHB | CSH | 63714602 | 0 | 0 | 0 |
| CHB | CSH | 63719602 | 0 | 0 | 0 |
| CHB | CSH | 63724602 | 0 | 0 | 0 |

## 2\_TajimasD\_data

|     |     |          |   |   |   |
|-----|-----|----------|---|---|---|
| CHB | CSH | 63729602 | 0 | 0 | 0 |
| CHB | CSH | 63734602 | 0 | 0 | 0 |
| CHB | CSH | 63739602 | 0 | 0 | 0 |
| CHB | CSH | 63744602 | 0 | 0 | 0 |
| CHB | CSH | 63749602 | 0 | 0 | 0 |
| CHB | CSH | 63754602 | 0 | 0 | 0 |
| CHB | CSH | 63759602 | 0 | 0 | 0 |
| CHB | CSH | 63764602 | 0 | 0 | 0 |
| CHB | CSH | 63769602 | 0 | 0 | 0 |
| CHB | CSH | 63774602 | 0 | 0 | 0 |
| CHB | CSH | 63779602 | 0 | 0 | 0 |
| CHB | CSH | 63784602 | 0 | 0 | 0 |
| CHB | CSH | 63789602 | 0 | 0 | 0 |
| CHB | CSH | 63794602 | 0 | 0 | 0 |
| CHB | CSH | 63799602 | 0 | 0 | 0 |
| CHB | CSH | 63804602 | 0 | 0 | 0 |
| CHB | CSH | 63809602 | 0 | 0 | 0 |
| CHB | CSH | 63814602 | 0 | 0 | 0 |
| CHB | CSH | 63819602 | 0 | 0 | 0 |
| CHB | CSH | 63824602 | 0 | 0 | 0 |
| CHB | CSH | 63829602 | 0 | 0 | 0 |
| CHB | CSH | 63834602 | 0 | 0 | 0 |
| CHB | CSH | 63839602 | 0 | 0 | 0 |
| CHB | CSH | 63844602 | 0 | 0 | 0 |
| CHB | CSH | 63849602 | 0 | 0 | 0 |
| CHB | CSH | 63854602 | 0 | 0 | 0 |
| CHB | CSH | 63859602 | 0 | 0 | 0 |
| CHB | CSH | 63864602 | 0 | 0 | 0 |
| CHB | CSH | 63869602 | 0 | 0 | 0 |
| CHB | CSH | 63874602 | 0 | 0 | 0 |
| CHB | CSH | 63879602 | 0 | 0 | 0 |
| CHB | CSH | 63884602 | 0 | 0 | 0 |
| CHB | CSH | 63889602 | 0 | 0 | 0 |
| CHB | CSH | 63894602 | 0 | 0 | 0 |
| CHB | CSH | 63899602 | 0 | 0 | 0 |
| CHB | CSH | 63904602 | 0 | 0 | 0 |
| CHB | CSH | 63909602 | 0 | 0 | 0 |
| CHB | CSH | 63914602 | 0 | 0 | 0 |
| CHB | CSH | 63919602 | 0 | 0 | 0 |
| CHB | CSH | 63924602 | 0 | 0 | 0 |
| CHB | CSH | 63929602 | 0 | 0 | 0 |
| CHB | CSH | 63934602 | 0 | 0 | 0 |
| CHB | CSH | 63939602 | 0 | 0 | 0 |
| CHB | CSH | 63944602 | 0 | 0 | 0 |
| CHB | CSH | 63949602 | 0 | 0 | 0 |
| CHB | CSH | 63954602 | 0 | 0 | 0 |
| CHB | CSH | 63959602 | 0 | 0 | 0 |
| CHB | CSH | 63964602 | 0 | 0 | 0 |
| CHB | CSH | 63969602 | 0 | 0 | 0 |



## 2\_TajimasD\_data

|     |     |          |   |   |   |
|-----|-----|----------|---|---|---|
| CHB | CSH | 63974602 | 0 | 0 | 0 |
| CHB | CSH | 63979602 | 0 | 0 | 0 |
| CHB | CSH | 63984602 | 0 | 0 | 0 |
| CHB | CSH | 63989602 | 0 | 0 | 0 |
| CHB | CSH | 63994602 | 0 | 0 | 0 |
| CHB | CSH | 63999602 | 0 | 0 | 0 |
| CHB | CSH | 64004602 | 0 | 0 | 0 |
| CHB | CSH | 64009602 | 0 | 0 | 0 |
| CHB | CSH | 64014602 | 0 | 0 | 0 |
| CHB | CSH | 64019602 | 0 | 0 | 0 |
| CHB | CSH | 64024602 | 0 | 0 | 0 |
| CHB | CSH | 64029602 | 0 | 0 | 0 |
| CHB | CSH | 64034602 | 0 | 0 | 0 |
| CHB | CSH | 64039602 | 0 | 0 | 0 |
| CHB | CSH | 64044602 | 0 | 0 | 0 |
| CHB | CSH | 64049602 | 0 | 0 | 0 |
| CHB | CSH | 64054602 | 0 | 0 | 0 |
| CHB | CSH | 64059602 | 0 | 0 | 0 |
| CHB | CSH | 64064602 | 0 | 0 | 0 |
| CHB | CSH | 64069602 | 0 | 0 | 0 |
| CHB | CSH | 64074602 | 0 | 0 | 0 |
| CHB | CSH | 64079602 | 0 | 0 | 0 |
| CHB | CSH | 64084602 | 0 | 0 | 0 |
| CHB | CSH | 64089602 | 0 | 0 | 0 |
| CHB | CSH | 64094602 | 0 | 0 | 0 |
| CHB | CSH | 64099602 | 0 | 0 | 0 |
| CHB | CSH | 64104602 | 0 | 0 | 0 |
| CHB | CSH | 64109602 | 0 | 0 | 0 |
| CHB | CSH | 64114602 | 0 | 0 | 0 |
| CHB | CSH | 64119602 | 0 | 0 | 0 |
| CHB | CSH | 64124602 | 0 | 0 | 0 |
| CHB | CSH | 64129602 | 0 | 0 | 0 |
| CHB | CSH | 64134602 | 0 | 0 | 0 |
| CHB | CSH | 64139602 | 0 | 0 | 0 |
| CHB | CSH | 64144602 | 0 | 0 | 0 |
| CHB | CSH | 64149602 | 0 | 0 | 0 |
| CHB | CSH | 64154602 | 0 | 0 | 0 |
| CHB | CSH | 64159602 | 0 | 0 | 0 |
| CHB | CSH | 64164602 | 0 | 0 | 0 |
| CHB | CSH | 64169602 | 0 | 0 | 0 |
| CHB | CSH | 64174602 | 0 | 0 | 0 |
| CHB | CSH | 64179602 | 0 | 0 | 0 |
| CHB | CSH | 64184602 | 0 | 0 | 0 |
| CHB | CSH | 64189602 | 0 | 0 | 0 |
| CHB | CSH | 64194602 | 0 | 0 | 0 |
| CHB | CSH | 64199602 | 0 | 0 | 0 |
| CHB | CSH | 64204602 | 0 | 0 | 0 |
| CHB | CSH | 64209602 | 0 | 0 | 0 |
| CHB | CSH | 64214602 | 0 | 0 | 0 |

## 2\_TajimasD\_data

|     |     |          |   |   |   |
|-----|-----|----------|---|---|---|
| CHB | CSH | 64219602 | 0 | 0 | 0 |
| CHB | CSH | 64224602 | 0 | 0 | 0 |
| CHB | CSH | 64229602 | 0 | 0 | 0 |
| CHB | CSH | 64234602 | 0 | 0 | 0 |
| CHB | CSH | 64239602 | 0 | 0 | 0 |
| CHB | CSH | 64244602 | 0 | 0 | 0 |
| CHB | CSH | 64249602 | 0 | 0 | 0 |
| CHB | CSH | 64254602 | 0 | 0 | 0 |
| CHB | CSH | 64259602 | 0 | 0 | 0 |
| CHB | CSH | 64264602 | 0 | 0 | 0 |
| CHB | CSH | 64269602 | 0 | 0 | 0 |
| CHB | CSH | 64274602 | 0 | 0 | 0 |
| CHB | CSH | 64279602 | 0 | 0 | 0 |
| CHB | CSH | 64284602 | 0 | 0 | 0 |
| CHB | CSH | 64289602 | 0 | 0 | 0 |
| CHB | CSH | 64294602 | 0 | 0 | 0 |
| CHB | CSH | 64299602 | 0 | 0 | 0 |
| CHB | CSH | 64304602 | 0 | 0 | 0 |
| CHB | CSH | 64309602 | 0 | 0 | 0 |
| CHB | CSH | 64314602 | 0 | 0 | 0 |
| CHB | CSH | 64319602 | 0 | 0 | 0 |
| CHB | CSH | 64324602 | 0 | 0 | 0 |
| CHB | CSH | 64329602 | 0 | 0 | 0 |
| CHB | CSH | 64334602 | 0 | 0 | 0 |
| CHB | CSH | 64339602 | 0 | 0 | 0 |
| CHB | CSH | 64344602 | 0 | 0 | 0 |
| CHB | CSH | 64349602 | 0 | 0 | 0 |
| CHB | CSH | 64354602 | 0 | 0 | 0 |
| CHB | CSH | 64359602 | 0 | 0 | 0 |
| CHB | CSH | 64364602 | 0 | 0 | 0 |
| CHB | CSH | 64369602 | 0 | 0 | 0 |
| CHB | CSH | 64374602 | 0 | 0 | 0 |
| CHB | CSH | 64379602 | 0 | 0 | 0 |
| CHB | CSH | 64384602 | 0 | 0 | 0 |
| CHB | CSH | 64389602 | 0 | 0 | 0 |
| CHB | CSH | 64394602 | 0 | 0 | 0 |
| CHB | CSH | 64399602 | 0 | 0 | 0 |
| CHB | CSH | 64404602 | 0 | 0 | 0 |
| YRI | CSH | 63414602 | 0 | 0 | 0 |
| YRI | CSH | 63419602 | 0 | 0 | 0 |
| YRI | CSH | 63424602 | 0 | 0 | 0 |
| YRI | CSH | 63429602 | 0 | 0 | 0 |
| YRI | CSH | 63434602 | 0 | 0 | 0 |
| YRI | CSH | 63439602 | 0 | 0 | 0 |
| YRI | CSH | 63444602 | 0 | 0 | 0 |
| YRI | CSH | 63449602 | 0 | 0 | 0 |
| YRI | CSH | 63454602 | 0 | 0 | 0 |
| YRI | CSH | 63459602 | 0 | 0 | 0 |
| YRI | CSH | 63464602 | 0 | 0 | 0 |

## 2\_TajimasD\_data

|     |     |          |   |   |   |
|-----|-----|----------|---|---|---|
| YRI | CSH | 63469602 | 0 | 0 | 0 |
| YRI | CSH | 63474602 | 0 | 0 | 0 |
| YRI | CSH | 63479602 | 0 | 0 | 0 |
| YRI | CSH | 63484602 | 0 | 0 | 0 |
| YRI | CSH | 63489602 | 0 | 0 | 0 |
| YRI | CSH | 63494602 | 0 | 0 | 0 |
| YRI | CSH | 63499602 | 0 | 0 | 0 |
| YRI | CSH | 63504602 | 0 | 0 | 0 |
| YRI | CSH | 63509602 | 0 | 0 | 0 |
| YRI | CSH | 63514602 | 0 | 0 | 0 |
| YRI | CSH | 63519602 | 0 | 0 | 0 |
| YRI | CSH | 63524602 | 0 | 0 | 0 |
| YRI | CSH | 63529602 | 0 | 0 | 0 |
| YRI | CSH | 63534602 | 0 | 0 | 0 |
| YRI | CSH | 63539602 | 0 | 0 | 0 |
| YRI | CSH | 63544602 | 0 | 0 | 0 |
| YRI | CSH | 63549602 | 0 | 0 | 0 |
| YRI | CSH | 63554602 | 0 | 0 | 0 |
| YRI | CSH | 63559602 | 0 | 0 | 0 |
| YRI | CSH | 63564602 | 0 | 0 | 0 |
| YRI | CSH | 63569602 | 0 | 0 | 0 |
| YRI | CSH | 63574602 | 0 | 0 | 0 |
| YRI | CSH | 63579602 | 0 | 0 | 0 |
| YRI | CSH | 63584602 | 0 | 0 | 0 |
| YRI | CSH | 63589602 | 0 | 0 | 0 |
| YRI | CSH | 63594602 | 0 | 0 | 0 |
| YRI | CSH | 63599602 | 0 | 0 | 0 |
| YRI | CSH | 63604602 | 0 | 0 | 0 |
| YRI | CSH | 63609602 | 0 | 0 | 0 |
| YRI | CSH | 63614602 | 0 | 0 | 0 |
| YRI | CSH | 63619602 | 0 | 0 | 0 |
| YRI | CSH | 63624602 | 0 | 0 | 0 |
| YRI | CSH | 63629602 | 0 | 0 | 0 |
| YRI | CSH | 63634602 | 0 | 0 | 0 |
| YRI | CSH | 63639602 | 0 | 0 | 0 |
| YRI | CSH | 63644602 | 0 | 0 | 0 |
| YRI | CSH | 63649602 | 0 | 0 | 0 |
| YRI | CSH | 63654602 | 0 | 0 | 0 |
| YRI | CSH | 63659602 | 0 | 0 | 0 |
| YRI | CSH | 63664602 | 0 | 0 | 0 |
| YRI | CSH | 63669602 | 0 | 0 | 0 |
| YRI | CSH | 63674602 | 0 | 0 | 0 |
| YRI | CSH | 63679602 | 0 | 0 | 0 |
| YRI | CSH | 63684602 | 0 | 0 | 0 |
| YRI | CSH | 63689602 | 0 | 0 | 0 |
| YRI | CSH | 63694602 | 0 | 0 | 0 |
| YRI | CSH | 63699602 | 0 | 0 | 0 |
| YRI | CSH | 63704602 | 0 | 0 | 0 |
| YRI | CSH | 63709602 | 0 | 0 | 0 |

## 2\_TajimasD\_data

|     |     |          |   |   |   |
|-----|-----|----------|---|---|---|
| YRI | CSH | 63714602 | 0 | 0 | 0 |
| YRI | CSH | 63719602 | 0 | 0 | 0 |
| YRI | CSH | 63724602 | 0 | 0 | 0 |
| YRI | CSH | 63729602 | 0 | 0 | 0 |
| YRI | CSH | 63734602 | 0 | 0 | 0 |
| YRI | CSH | 63739602 | 0 | 0 | 0 |
| YRI | CSH | 63744602 | 0 | 0 | 0 |
| YRI | CSH | 63749602 | 0 | 0 | 0 |
| YRI | CSH | 63754602 | 0 | 0 | 0 |
| YRI | CSH | 63759602 | 0 | 0 | 0 |
| YRI | CSH | 63764602 | 0 | 0 | 0 |
| YRI | CSH | 63769602 | 0 | 0 | 0 |
| YRI | CSH | 63774602 | 0 | 0 | 0 |
| YRI | CSH | 63779602 | 0 | 0 | 0 |
| YRI | CSH | 63784602 | 0 | 0 | 0 |
| YRI | CSH | 63789602 | 0 | 0 | 0 |
| YRI | CSH | 63794602 | 0 | 0 | 0 |
| YRI | CSH | 63799602 | 0 | 0 | 0 |
| YRI | CSH | 63804602 | 0 | 0 | 0 |
| YRI | CSH | 63809602 | 0 | 0 | 0 |
| YRI | CSH | 63814602 | 0 | 0 | 0 |
| YRI | CSH | 63819602 | 0 | 0 | 0 |
| YRI | CSH | 63824602 | 0 | 0 | 0 |
| YRI | CSH | 63829602 | 0 | 0 | 0 |
| YRI | CSH | 63834602 | 0 | 0 | 0 |
| YRI | CSH | 63839602 | 0 | 0 | 0 |
| YRI | CSH | 63844602 | 0 | 0 | 0 |
| YRI | CSH | 63849602 | 0 | 0 | 0 |
| YRI | CSH | 63854602 | 0 | 0 | 0 |
| YRI | CSH | 63859602 | 0 | 0 | 0 |
| YRI | CSH | 63864602 | 0 | 0 | 0 |
| YRI | CSH | 63869602 | 0 | 0 | 0 |
| YRI | CSH | 63874602 | 0 | 0 | 0 |
| YRI | CSH | 63879602 | 0 | 0 | 0 |
| YRI | CSH | 63884602 | 0 | 0 | 0 |
| YRI | CSH | 63889602 | 0 | 0 | 0 |
| YRI | CSH | 63894602 | 0 | 0 | 0 |
| YRI | CSH | 63899602 | 0 | 0 | 0 |
| YRI | CSH | 63904602 | 0 | 0 | 0 |
| YRI | CSH | 63909602 | 0 | 0 | 0 |
| YRI | CSH | 63914602 | 0 | 0 | 0 |
| YRI | CSH | 63919602 | 0 | 0 | 0 |
| YRI | CSH | 63924602 | 0 | 0 | 0 |
| YRI | CSH | 63929602 | 0 | 0 | 0 |
| YRI | CSH | 63934602 | 0 | 0 | 0 |
| YRI | CSH | 63939602 | 0 | 0 | 0 |
| YRI | CSH | 63944602 | 0 | 0 | 0 |
| YRI | CSH | 63949602 | 0 | 0 | 0 |
| YRI | CSH | 63954602 | 0 | 0 | 0 |

## 2\_TajimasD\_data

|     |     |          |   |   |   |
|-----|-----|----------|---|---|---|
| YRI | CSH | 63959602 | 0 | 0 | 0 |
| YRI | CSH | 63964602 | 0 | 0 | 0 |
| YRI | CSH | 63969602 | 0 | 0 | 0 |
| YRI | CSH | 63974602 | 0 | 0 | 0 |
| YRI | CSH | 63979602 | 0 | 0 | 0 |
| YRI | CSH | 63984602 | 0 | 0 | 0 |
| YRI | CSH | 63989602 | 0 | 0 | 0 |
| YRI | CSH | 63994602 | 0 | 0 | 0 |
| YRI | CSH | 63999602 | 0 | 0 | 0 |
| YRI | CSH | 64004602 | 0 | 0 | 0 |
| YRI | CSH | 64009602 | 0 | 0 | 0 |
| YRI | CSH | 64014602 | 0 | 0 | 0 |
| YRI | CSH | 64019602 | 0 | 0 | 0 |
| YRI | CSH | 64024602 | 0 | 0 | 0 |
| YRI | CSH | 64029602 | 0 | 0 | 0 |
| YRI | CSH | 64034602 | 0 | 0 | 0 |
| YRI | CSH | 64039602 | 0 | 0 | 0 |
| YRI | CSH | 64044602 | 0 | 0 | 0 |
| YRI | CSH | 64049602 | 0 | 0 | 0 |
| YRI | CSH | 64054602 | 0 | 0 | 0 |
| YRI | CSH | 64059602 | 0 | 0 | 0 |
| YRI | CSH | 64064602 | 0 | 0 | 0 |
| YRI | CSH | 64069602 | 0 | 0 | 0 |
| YRI | CSH | 64074602 | 0 | 0 | 0 |
| YRI | CSH | 64079602 | 0 | 0 | 0 |
| YRI | CSH | 64084602 | 0 | 0 | 0 |
| YRI | CSH | 64089602 | 0 | 0 | 0 |
| YRI | CSH | 64094602 | 0 | 0 | 0 |
| YRI | CSH | 64099602 | 0 | 0 | 0 |
| YRI | CSH | 64104602 | 0 | 0 | 0 |
| YRI | CSH | 64109602 | 0 | 0 | 0 |
| YRI | CSH | 64114602 | 0 | 0 | 0 |
| YRI | CSH | 64119602 | 0 | 0 | 0 |
| YRI | CSH | 64124602 | 0 | 0 | 0 |
| YRI | CSH | 64129602 | 0 | 0 | 0 |
| YRI | CSH | 64134602 | 0 | 0 | 0 |
| YRI | CSH | 64139602 | 0 | 0 | 0 |
| YRI | CSH | 64144602 | 0 | 0 | 0 |
| YRI | CSH | 64149602 | 0 | 0 | 0 |
| YRI | CSH | 64154602 | 0 | 0 | 0 |
| YRI | CSH | 64159602 | 0 | 0 | 0 |
| YRI | CSH | 64164602 | 0 | 0 | 0 |
| YRI | CSH | 64169602 | 0 | 0 | 0 |
| YRI | CSH | 64174602 | 0 | 0 | 0 |
| YRI | CSH | 64179602 | 0 | 0 | 0 |
| YRI | CSH | 64184602 | 0 | 0 | 0 |
| YRI | CSH | 64189602 | 0 | 0 | 0 |
| YRI | CSH | 64194602 | 0 | 0 | 0 |
| YRI | CSH | 64199602 | 0 | 0 | 0 |

## 2\_TajimasD\_data

|     |     |          |        |        |         |
|-----|-----|----------|--------|--------|---------|
| YRI | CSH | 64204602 | 0      | 0      | 0       |
| YRI | CSH | 64209602 | 0      | 0      | 0       |
| YRI | CSH | 64214602 | 0      | 0      | 0       |
| YRI | CSH | 64219602 | 0      | 0      | 0       |
| YRI | CSH | 64224602 | 0      | 0      | 0       |
| YRI | CSH | 64229602 | 0      | 0      | 0       |
| YRI | CSH | 64234602 | 0      | 0      | 0       |
| YRI | CSH | 64239602 | 0      | 0      | 0       |
| YRI | CSH | 64244602 | 0      | 0      | 0       |
| YRI | CSH | 64249602 | 0      | 0      | 0       |
| YRI | CSH | 64254602 | 0      | 0      | 0       |
| YRI | CSH | 64259602 | 0      | 0      | 0       |
| YRI | CSH | 64264602 | 0      | 0      | 0       |
| YRI | CSH | 64269602 | 0      | 0      | 0       |
| YRI | CSH | 64274602 | 0      | 0      | 0       |
| YRI | CSH | 64279602 | 0      | 0      | 0       |
| YRI | CSH | 64284602 | 0      | 0      | 0       |
| YRI | CSH | 64289602 | 0      | 0      | 0       |
| YRI | CSH | 64294602 | 0      | 0      | 0       |
| YRI | CSH | 64299602 | 0      | 0      | 0       |
| YRI | CSH | 64304602 | 0      | 0      | 0       |
| YRI | CSH | 64309602 | 0      | 0      | 0       |
| YRI | CSH | 64314602 | 0      | 0      | 0       |
| YRI | CSH | 64319602 | 0      | 0      | 0       |
| YRI | CSH | 64324602 | 0      | 0      | 0       |
| YRI | CSH | 64329602 | 0      | 0      | 0       |
| YRI | CSH | 64334602 | 0      | 0      | 0       |
| YRI | CSH | 64339602 | 0      | 0      | 0       |
| YRI | CSH | 64344602 | 0      | 0      | 0       |
| YRI | CSH | 64349602 | 0      | 0      | 0       |
| YRI | CSH | 64354602 | 0      | 0      | 0       |
| YRI | CSH | 64359602 | 0      | 0      | 0       |
| YRI | CSH | 64364602 | 0      | 0      | 0       |
| YRI | CSH | 64369602 | 0      | 0      | 0       |
| YRI | CSH | 64374602 | 0      | 0      | 0       |
| YRI | CSH | 64379602 | 0      | 0      | 0       |
| YRI | CSH | 64384602 | 0      | 0      | 0       |
| YRI | CSH | 64389602 | 0      | 0      | 0       |
| YRI | CSH | 64394602 | 0      | 0      | 0       |
| YRI | CSH | 64399602 | 0      | 0      | 0       |
| YRI | CSH | 64404602 | 0      | 0      | 0       |
| CEU | CSH | 10940290 | 2.0291 | 4.9463 | -1.6637 |
| CEU | CSH | 10945290 | 2.3393 | 4.2641 | -1.2495 |
| CEU | CSH | 10950290 | 3.7615 | 4.4346 | -0.4223 |
| CEU | CSH | 10955290 | 3.8866 | 5.6286 | -0.8861 |
| CEU | CSH | 10960290 | 5.5088 | 6.1402 | -0.2971 |
| CEU | CSH | 10965290 | 6.3131 | 6.6519 | -0.1483 |
| CEU | CSH | 10970290 | 4.1886 | 6.1402 | -0.9184 |
| CEU | CSH | 10975290 | 3.7196 | 5.7991 | -1.03   |

## 2\_TajimasD\_data

|     |     |          |         |         |         |
|-----|-----|----------|---------|---------|---------|
| CEU | CSH | 10980290 | 3.5659  | 6.1402  | -1.2114 |
| CEU | CSH | 10985290 | 4.0917  | 5.458   | -0.7143 |
| CEU | CSH | 10990290 | 4.5568  | 5.9697  | -0.6819 |
| CEU | CSH | 10995290 | 3.6116  | 5.1169  | -0.8332 |
| CEU | CSH | 11000290 | 4.5203  | 6.9931  | -1.0347 |
| CEU | CSH | 11005290 | 4.7749  | 7.6753  | -1.1148 |
| CEU | CSH | 11010290 | 3.7833  | 5.7991  | -0.9984 |
| CEU | CSH | 11015290 | 4.8835  | 5.7991  | -0.4535 |
| CEU | CSH | 11020290 | 4.847   | 6.3108  | -0.6721 |
| CEU | CSH | 11025290 | 4.329   | 7.8459  | -1.3249 |
| CEU | CSH | 11030290 | 3.8382  | 7.1636  | -1.3613 |
| CEU | CSH | 11035290 | 2.0726  | 5.1169  | -1.6851 |
| CEU | CSH | 11040290 | 6.3395  | 7.8459  | -0.5675 |
| CEU | CSH | 11045290 | 8.9705  | 9.2104  | -0.078  |
| CEU | CSH | 11050290 | 7.4253  | 6.6519  | 0.3386  |
| CEU | CSH | 11055290 | 7.2593  | 7.6753  | -0.1599 |
| CEU | CSH | 11060290 | 7.4527  | 9.7221  | -0.7013 |
| CEU | CSH | 11065290 | 13.2059 | 11.4277 | 0.4724  |
| CEU | CSH | 11070290 | 13.377  | 10.4043 | 0.8624  |
| CEU | CSH | 11075290 | 7.3375  | 7.8459  | -0.1915 |
| CEU | CSH | 11080290 | 6.2457  | 7.6753  | -0.5495 |
| CEU | CSH | 11085290 | 6.4426  | 8.5281  | -0.7277 |
| CEU | CSH | 11090290 | 4.4271  | 7.5047  | -1.2075 |
| CEU | CSH | 11095290 | 3.1198  | 7.3342  | -1.6886 |
| CEU | CSH | 11100290 | 3.8532  | 8.187   | -1.57   |
| CEU | CSH | 11105290 | 4.8112  | 7.1636  | -0.963  |
| CEU | CSH | 11110290 | 7.1614  | 9.0398  | -0.621  |
| CEU | CSH | 11115290 | 7.0379  | 9.3809  | -0.7485 |
| CEU | CSH | 11120290 | 3.7398  | 7.1636  | -1.4015 |
| CEU | CSH | 11125290 | 5.2989  | 7.8459  | -0.9595 |
| CEU | CSH | 11130290 | 6.1758  | 7.6753  | -0.5764 |
| CEU | CSH | 11135290 | 6.1703  | 7.1636  | -0.4066 |
| CEU | CSH | 11140290 | 4.9922  | 6.3108  | -0.6054 |
| CEU | CSH | 11145290 | 4.176   | 7.1636  | -1.223  |
| CEU | CSH | 11150290 | 6.0672  | 8.187   | -0.768  |
| CEU | CSH | 11155290 | 6.6945  | 9.3809  | -0.8582 |
| CEU | CSH | 11160290 | 9.9159  | 10.916  | -0.2774 |
| CEU | CSH | 11165290 | 12.6751 | 11.4277 | 0.3314  |
| CEU | CSH | 11170290 | 13.6743 | 13.1333 | 0.1261  |
| CEU | CSH | 11175290 | 11.9779 | 12.2805 | -0.0751 |
| CEU | CSH | 11180290 | 8.4158  | 8.8692  | -0.1526 |
| CEU | CSH | 11185290 | 8.4566  | 10.7454 | -0.6442 |
| CEU | CSH | 11190290 | 9.7926  | 15.1801 | -1.094  |
| CEU | CSH | 11195290 | 6.2266  | 11.5982 | -1.4074 |
| CEU | CSH | 11200290 | 2.7019  | 6.1402  | -1.618  |
| CEU | CSH | 11205290 | 5.2923  | 8.5281  | -1.129  |
| CEU | CSH | 11210290 | 5.7215  | 9.5515  | -1.2032 |
| CEU | CSH | 11215290 | 4.1156  | 7.5047  | -1.3297 |
| CEU | CSH | 11220290 | 7.0338  | 9.2104  | -0.7073 |

## 2\_TajimasD\_data

|     |     |          |         |         |         |
|-----|-----|----------|---------|---------|---------|
| CEU | CSH | 11225290 | 17.7434 | 13.9861 | 0.8248  |
| CEU | CSH | 11230290 | 22.5624 | 16.374  | 1.169   |
| CEU | CSH | 11235290 | 20.5436 | 16.0329 | 0.8694  |
| CEU | CSH | 11240290 | 23.584  | 16.7151 | 1.2722  |
| CEU | CSH | 11245290 | 26.0074 | 17.2268 | 1.58    |
| CEU | CSH | 11250290 | 16.8891 | 14.3272 | 0.5497  |
| CEU | CSH | 11255290 | 9.2305  | 13.3039 | -0.9376 |
| CEU | CSH | 11260290 | 15.4997 | 16.5446 | -0.1954 |
| CEU | CSH | 11265290 | 18.7378 | 15.5212 | 0.6395  |
| CEU | CSH | 11270290 | 17.1132 | 12.4511 | 1.1425  |
| CEU | CSH | 11275290 | 14.557  | 12.2805 | 0.5652  |
| CEU | CSH | 11280290 | 10.0276 | 10.916  | -0.2464 |
| CEU | CSH | 11285290 | 5.8907  | 8.0164  | -0.7851 |
| CEU | CSH | 11290290 | 9.5152  | 11.7688 | -0.5824 |
| CEU | CSH | 11295290 | 14.778  | 17.0562 | -0.4139 |
| CEU | CSH | 11300290 | 14.4001 | 15.1801 | -0.1584 |
| CEU | CSH | 11305290 | 11.5799 | 11.4277 | 0.0404  |
| CEU | CSH | 11310290 | 8.2041  | 8.5281  | -0.113  |
| CEU | CSH | 11315290 | 8.8905  | 8.187   | 0.2549  |
| CEU | CSH | 11320290 | 9.8802  | 8.5281  | 0.4718  |
| CEU | CSH | 11325290 | 12.0214 | 9.0398  | 0.9858  |
| CEU | CSH | 11330290 | 9.9217  | 10.2337 | -0.0919 |
| CEU | CSH | 11335290 | 4.1676  | 9.5515  | -1.6914 |
| CEU | CSH | 11340290 | 4.7231  | 8.6987  | -1.362  |
| CEU | CSH | 11345290 | 4.9808  | 8.0164  | -1.1212 |
| CEU | CSH | 11350290 | 3.1767  | 6.3108  | -1.4389 |
| CEU | CSH | 11355290 | 3.6267  | 5.6286  | -1.0183 |
| CEU | CSH | 11360290 | 4.8761  | 5.2874  | -0.2212 |
| CEU | CSH | 11365290 | 7.644   | 7.3342  | 0.1241  |
| CEU | CSH | 11370290 | 8.4343  | 9.0398  | -0.2002 |
| CEU | CSH | 11375290 | 6.6096  | 7.1636  | -0.2268 |
| CEU | CSH | 11380290 | 21.2696 | 13.645  | 1.7134  |
| CEU | CSH | 11385290 | 28.2523 | 18.7619 | 1.5734  |
| CEU | CSH | 11390290 | 20.1016 | 16.2034 | 0.7438  |
| CEU | CSH | 11395290 | 14.9953 | 16.5446 | -0.2898 |
| CEU | CSH | 11400290 | 9.3405  | 15.5212 | -1.2288 |
| CEU | CSH | 11405290 | 11.0645 | 11.2571 | -0.0519 |
| CEU | CSH | 11410290 | 14.2061 | 10.2337 | 1.1703  |
| CEU | CSH | 11415290 | 8.7464  | 8.187   | 0.2027  |
| CEU | CSH | 11420290 | 4.6046  | 5.2874  | -0.3671 |
| CEU | CSH | 11425290 | 6.4317  | 7.8459  | -0.5327 |
| CEU | CSH | 11430290 | 6.1163  | 10.0632 | -1.1812 |
| CEU | CSH | 11435290 | 4.7326  | 9.3809  | -1.485  |
| CEU | CSH | 11440290 | 3.8792  | 8.3576  | -1.5919 |
| CEU | CSH | 11445290 | 5.1171  | 10.0632 | -1.4802 |
| CEU | CSH | 11450290 | 5.348   | 9.5515  | -1.3206 |
| CEU | CSH | 11455290 | 3.6386  | 6.4814  | -1.2742 |
| CEU | CSH | 11460290 | 3.2099  | 5.7991  | -1.2824 |
| CEU | CSH | 11465290 | 4.2301  | 5.9697  | -0.8396 |



## 2\_TajimasD\_data

|     |     |          |         |         |         |
|-----|-----|----------|---------|---------|---------|
| CEU | CSH | 11470290 | 4.3727  | 6.8225  | -1.0483 |
| CEU | CSH | 11475290 | 2.4288  | 7.6753  | -2.0166 |
| CEU | CSH | 11480290 | 2.6518  | 7.6753  | -1.9309 |
| CEU | CSH | 11485290 | 2.176   | 5.2874  | -1.673  |
| CEU | CSH | 11490290 | 0.7401  | 4.2641  | -2.2876 |
| CEU | CSH | 11495290 | 2.1123  | 6.3108  | -1.9276 |
| CEU | CSH | 11500290 | 3.8827  | 8.187   | -1.5594 |
| CEU | CSH | 11505290 | 6.4766  | 13.645  | -1.6109 |
| CEU | CSH | 11510290 | 6.3764  | 13.3039 | -1.5946 |
| CEU | CSH | 11515290 | 2.8598  | 7.5047  | -1.8224 |
| CEU | CSH | 11520290 | 3.2995  | 8.0164  | -1.7422 |
| CEU | CSH | 11525290 | 5.4096  | 9.0398  | -1.2002 |
| CEU | CSH | 11530290 | 3.785   | 7.5047  | -1.4594 |
| CEU | CSH | 11535290 | 3.5327  | 10.0632 | -1.9543 |
| CEU | CSH | 11540290 | 5.824   | 12.2805 | -1.603  |
| CEU | CSH | 11545290 | 5.1936  | 10.0632 | -1.4573 |
| CEU | CSH | 11550290 | 3.2181  | 8.187   | -1.8001 |
| CEU | CSH | 11555290 | 3.827   | 8.6987  | -1.669  |
| CEU | CSH | 11560290 | 4.5551  | 8.8692  | -1.4517 |
| CEU | CSH | 11565290 | 5.3845  | 8.8692  | -1.1726 |
| CEU | CSH | 11570290 | 7.3094  | 12.1099 | -1.2077 |
| CEU | CSH | 11575290 | 7.0837  | 13.645  | -1.4745 |
| CEU | CSH | 11580290 | 5.6895  | 11.7688 | -1.5711 |
| CEU | CSH | 11585290 | 3.8227  | 8.187   | -1.5811 |
| CEU | CSH | 11590290 | 2.3271  | 5.7991  | -1.7197 |
| CEU | CSH | 11595290 | 3.8854  | 10.0632 | -1.8488 |
| CEU | CSH | 11600290 | 4.9456  | 11.7688 | -1.7633 |
| CEU | CSH | 11605290 | 3.6496  | 8.187   | -1.6438 |
| CEU | CSH | 11610290 | 4.0557  | 8.8692  | -1.6198 |
| CEU | CSH | 11615290 | 4.706   | 9.2104  | -1.4637 |
| CEU | CSH | 11620290 | 4.0076  | 8.3576  | -1.5463 |
| CEU | CSH | 11625290 | 4.3144  | 9.2104  | -1.5909 |
| CEU | CSH | 11630290 | 3.746   | 10.0632 | -1.8905 |
| CEU | CSH | 11635290 | 1.8462  | 7.1636  | -2.1767 |
| CEU | CSH | 11640290 | 2.5214  | 6.8225  | -1.8404 |
| CEU | CSH | 11645290 | 4.5416  | 10.5749 | -1.7238 |
| CEU | CSH | 11650290 | 4.4661  | 11.7688 | -1.8873 |
| CEU | CSH | 11655290 | 3.4106  | 10.5749 | -2.047  |
| CEU | CSH | 11660290 | 4.3284  | 10.4043 | -1.7626 |
| CEU | CSH | 11665290 | 4.2137  | 8.8692  | -1.5666 |
| CEU | CSH | 11670290 | 4.0236  | 7.6753  | -1.4036 |
| CEU | CSH | 11675290 | 7.5951  | 9.2104  | -0.5249 |
| CEU | CSH | 11680290 | 12.1653 | 9.8926  | 0.6911  |
| CEU | CSH | 11685290 | 10.4834 | 8.0164  | 0.9112  |
| CEU | CSH | 11690290 | 9.1408  | 9.0398  | 0.0334  |
| CEU | CSH | 11695290 | 9.5323  | 10.916  | -0.3838 |
| CEU | CSH | 11700290 | 10.1581 | 9.7221  | 0.1347  |
| CEU | CSH | 11705290 | 13.1655 | 9.7221  | 1.0641  |
| CEU | CSH | 11710290 | 14.8332 | 9.7221  | 1.5795  |

## 2\_TajimasD\_data

|     |     |          |         |         |         |
|-----|-----|----------|---------|---------|---------|
| CEU | CSH | 11715290 | 15.9619 | 9.2104  | 2.1939  |
| CEU | CSH | 11720290 | 12.4451 | 7.5047  | 1.9384  |
| CEU | CSH | 11725290 | 12.1325 | 7.5047  | 1.8157  |
| CEU | CSH | 11730290 | 20.1022 | 10.2337 | 2.9073  |
| CEU | CSH | 11735290 | 21.9152 | 12.7922 | 2.1794  |
| CEU | CSH | 11740290 | 11.9271 | 10.2337 | 0.4989  |
| CEU | CSH | 11745290 | 5.9503  | 7.6753  | -0.663  |
| CEU | CSH | 11750290 | 8.9875  | 9.3809  | -0.1257 |
| CEU | CSH | 11755290 | 11.165  | 9.2104  | 0.6351  |
| CEU | CSH | 11760290 | 9.6013  | 6.9931  | 1.0913  |
| CEU | CSH | 11765290 | 11.7273 | 9.2104  | 0.8179  |
| CEU | CSH | 11770290 | 18.946  | 12.2805 | 1.6549  |
| CEU | CSH | 11775290 | 17.1554 | 10.7454 | 1.8042  |
| CEU | CSH | 11780290 | 7.2731  | 8.0164  | -0.2745 |
| CEU | CSH | 11785290 | 7.1579  | 10.916  | -1.0423 |
| CEU | CSH | 11790290 | 7.6026  | 12.1099 | -1.1339 |
| CEU | CSH | 11795290 | 4.9687  | 8.8692  | -1.3125 |
| CEU | CSH | 11800290 | 5.4523  | 8.5281  | -1.0732 |
| CEU | CSH | 11805290 | 5.0445  | 8.0164  | -1.0977 |
| CEU | CSH | 11810290 | 5.0229  | 6.8225  | -0.77   |
| CEU | CSH | 11815290 | 4.7166  | 5.7991  | -0.5362 |
| CEU | CSH | 11820290 | 7.4995  | 8.187   | -0.2491 |
| CEU | CSH | 11825290 | 7.3979  | 9.3809  | -0.6335 |
| CEU | CSH | 11830290 | 4.176   | 7.5047  | -1.306  |
| CEU | CSH | 11835290 | 6.1821  | 8.6987  | -0.8622 |
| CEU | CSH | 11840290 | 7.0943  | 8.6987  | -0.5497 |
| CEU | CSH | 11845290 | 7.0332  | 8.3576  | -0.4708 |
| CEU | CSH | 11850290 | 6.2175  | 11.2571 | -1.358  |
| CEU | CSH | 11855290 | 4.1537  | 15.6917 | -2.27   |
| CEU | CSH | 11860290 | 3.9704  | 15.0095 | -2.2659 |
| CEU | CSH | 11865290 | 2.9963  | 12.1099 | -2.2927 |
| CEU | CSH | 11870290 | 14.1785 | 13.8156 | 0.0806  |
| CEU | CSH | 11875290 | 17.5499 | 10.2337 | 2.1554  |
| CEU | CSH | 11880290 | 21.1205 | 14.4978 | 1.405   |
| CEU | CSH | 11885290 | 22.4974 | 15.3506 | 1.4359  |
| CEU | CSH | 11890290 | 10.5673 | 7.1636  | 1.3933  |
| CEU | CSH | 11895290 | 6.0519  | 7.5047  | -0.57   |
| CEU | CSH | 11900290 | 3.8994  | 8.0164  | -1.5206 |
| CEU | CSH | 11905290 | 7.1142  | 7.8459  | -0.2756 |
| CEU | CSH | 11910290 | 9.8435  | 7.6753  | 0.8334  |
| CEU | CSH | 11915290 | 6.8266  | 6.3108  | 0.2368  |
| CEU | CSH | 11920290 | 5.8229  | 6.4814  | -0.2951 |
| CEU | CSH | 11925290 | 7.6287  | 8.3576  | -0.2591 |
| CEU | CSH | 11930290 | 7.5108  | 8.5281  | -0.3549 |
| CEU | CSH | 11935290 | 15.2723 | 10.0632 | 1.5589  |
| CEU | CSH | 11940290 | 21.9157 | 11.7688 | 2.6223  |
| CEU | CSH | 11945290 | 17.3185 | 10.5749 | 1.9268  |
| CHB | CSH | 10940290 | 6.3598  | 8.8096  | -0.8271 |
| CHB | CSH | 10945290 | 5.3929  | 8.3013  | -1.0373 |

## 2\_TajimasD\_data

|     |     |          |         |         |         |
|-----|-----|----------|---------|---------|---------|
| CHB | CSH | 10950290 | 6.4156  | 7.9625  | -0.5732 |
| CHB | CSH | 10955290 | 6.2549  | 8.1319  | -0.6822 |
| CHB | CSH | 10960290 | 7.7441  | 9.6567  | -0.5931 |
| CHB | CSH | 10965290 | 7.6573  | 9.4872  | -0.5768 |
| CHB | CSH | 10970290 | 6.1445  | 7.6237  | -0.5704 |
| CHB | CSH | 10975290 | 6.5132  | 7.4543  | -0.3704 |
| CHB | CSH | 10980290 | 5.1296  | 7.2848  | -0.8663 |
| CHB | CSH | 10985290 | 4.4719  | 6.0989  | -0.768  |
| CHB | CSH | 10990290 | 4.4948  | 6.4378  | -0.8736 |
| CHB | CSH | 10995290 | 4.2147  | 7.4543  | -1.2752 |
| CHB | CSH | 11000290 | 5.9109  | 9.1484  | -1.0555 |
| CHB | CSH | 11005290 | 5.3826  | 9.6567  | -1.3253 |
| CHB | CSH | 11010290 | 4.9218  | 9.9955  | -1.5235 |
| CHB | CSH | 11015290 | 6.5939  | 9.3178  | -0.8731 |
| CHB | CSH | 11020290 | 5.0474  | 6.7766  | -0.7423 |
| CHB | CSH | 11025290 | 4.0044  | 6.2684  | -1.0427 |
| CHB | CSH | 11030290 | 4.0204  | 7.2848  | -1.3122 |
| CHB | CSH | 11035290 | 3.5955  | 7.7931  | -1.5865 |
| CHB | CSH | 11040290 | 8.8519  | 9.8261  | -0.2972 |
| CHB | CSH | 11045290 | 11.0636 | 10.3343 | 0.2123  |
| CHB | CSH | 11050290 | 8.0327  | 8.4708  | -0.1534 |
| CHB | CSH | 11055290 | 6.6551  | 8.3013  | -0.5871 |
| CHB | CSH | 11060290 | 6.6217  | 7.7931  | -0.4427 |
| CHB | CSH | 11065290 | 11.6514 | 10.8426 | 0.2251  |
| CHB | CSH | 11070290 | 11.2115 | 10.3343 | 0.2553  |
| CHB | CSH | 11075290 | 6.616   | 8.1319  | -0.551  |
| CHB | CSH | 11080290 | 6.0731  | 9.1484  | -1.0027 |
| CHB | CSH | 11085290 | 5.7851  | 8.3013  | -0.8974 |
| CHB | CSH | 11090290 | 3.57    | 7.2848  | -1.4932 |
| CHB | CSH | 11095290 | 1.0257  | 5.5907  | -2.3292 |
| CHB | CSH | 11100290 | 1.807   | 5.9295  | -1.9958 |
| CHB | CSH | 11105290 | 3.9952  | 6.2684  | -1.047  |
| CHB | CSH | 11110290 | 6.569   | 7.7931  | -0.4626 |
| CHB | CSH | 11115290 | 5.909   | 8.6402  | -0.9388 |
| CHB | CSH | 11120290 | 2.6269  | 7.1154  | -1.8433 |
| CHB | CSH | 11125290 | 3.8072  | 7.4543  | -1.4356 |
| CHB | CSH | 11130290 | 5.0202  | 6.6072  | -0.697  |
| CHB | CSH | 11135290 | 6.1226  | 6.946   | -0.3456 |
| CHB | CSH | 11140290 | 5.4121  | 6.6072  | -0.5249 |
| CHB | CSH | 11145290 | 4.8534  | 7.2848  | -0.9773 |
| CHB | CSH | 11150290 | 6.3023  | 8.1319  | -0.665  |
| CHB | CSH | 11155290 | 5.9695  | 10.1649 | -1.2402 |
| CHB | CSH | 11160290 | 7.2212  | 13.7226 | -1.449  |
| CHB | CSH | 11165290 | 7.2496  | 13.5532 | -1.4216 |
| CHB | CSH | 11170290 | 6.3284  | 14.5697 | -1.7352 |
| CHB | CSH | 11175290 | 5.4407  | 14.5697 | -1.9221 |
| CHB | CSH | 11180290 | 4.3636  | 11.5202 | -1.8816 |
| CHB | CSH | 11185290 | 4.154   | 14.0615 | -2.1576 |
| CHB | CSH | 11190290 | 4.4019  | 17.2803 | -2.3039 |

## 2\_TajimasD\_data

|     |     |          |         |         |         |
|-----|-----|----------|---------|---------|---------|
| CHB | CSH | 11195290 | 3.2178  | 12.7061 | -2.2746 |
| CHB | CSH | 11200290 | 1.8968  | 9.8261  | -2.4192 |
| CHB | CSH | 11205290 | 4.5735  | 9.6567  | -1.5762 |
| CHB | CSH | 11210290 | 6.4836  | 8.1319  | -0.5991 |
| CHB | CSH | 11215290 | 6.8982  | 7.7931  | -0.3382 |
| CHB | CSH | 11220290 | 8.5976  | 9.1484  | -0.1796 |
| CHB | CSH | 11225290 | 18.0225 | 15.5862 | 0.481   |
| CHB | CSH | 11230290 | 21.608  | 17.7886 | 0.6646  |
| CHB | CSH | 11235290 | 19.5165 | 15.2474 | 0.8608  |
| CHB | CSH | 11240290 | 25.2277 | 16.4333 | 1.6508  |
| CHB | CSH | 11245290 | 27.4224 | 18.6357 | 1.462   |
| CHB | CSH | 11250290 | 18.1978 | 15.925  | 0.4396  |
| CHB | CSH | 11255290 | 11.6832 | 14.0615 | -0.5179 |
| CHB | CSH | 11260290 | 18.8348 | 16.9415 | 0.3452  |
| CHB | CSH | 11265290 | 22.0253 | 17.958  | 0.7013  |
| CHB | CSH | 11270290 | 19.2621 | 19.3133 | -0.0082 |
| CHB | CSH | 11275290 | 16.8172 | 17.958  | -0.1967 |
| CHB | CSH | 11280290 | 12.4203 | 15.7556 | -0.6518 |
| CHB | CSH | 11285290 | 8.2825  | 13.892  | -1.2358 |
| CHB | CSH | 11290290 | 7.5858  | 13.892  | -1.3893 |
| CHB | CSH | 11295290 | 9.8855  | 15.925  | -1.1683 |
| CHB | CSH | 11300290 | 11.6131 | 16.2638 | -0.8817 |
| CHB | CSH | 11305290 | 10.521  | 13.3838 | -0.6534 |
| CHB | CSH | 11310290 | 8.8987  | 9.9955  | -0.3293 |
| CHB | CSH | 11315290 | 10.8726 | 9.8261  | 0.3193  |
| CHB | CSH | 11320290 | 11.7306 | 10.1649 | 0.4628  |
| CHB | CSH | 11325290 | 13.3849 | 11.3508 | 0.5423  |
| CHB | CSH | 11330290 | 13.2239 | 11.3508 | 0.4994  |
| CHB | CSH | 11335290 | 8.2393  | 12.1979 | -0.9863 |
| CHB | CSH | 11340290 | 9.1597  | 12.1979 | -0.7569 |
| CHB | CSH | 11345290 | 10.186  | 10.8426 | -0.1827 |
| CHB | CSH | 11350290 | 6.3524  | 10.5037 | -1.1902 |
| CHB | CSH | 11355290 | 5.3982  | 8.8096  | -1.1518 |
| CHB | CSH | 11360290 | 6.8283  | 7.9625  | -0.4203 |
| CHB | CSH | 11365290 | 9.4131  | 9.9955  | -0.1749 |
| CHB | CSH | 11370290 | 10.4373 | 10.6731 | -0.0666 |
| CHB | CSH | 11375290 | 8.861   | 9.6567  | -0.2467 |
| CHB | CSH | 11380290 | 24.4344 | 15.5862 | 1.7471  |
| CHB | CSH | 11385290 | 30.822  | 18.4662 | 2.074   |
| CHB | CSH | 11390290 | 18.8667 | 14.7391 | 0.8596  |
| CHB | CSH | 11395290 | 12.132  | 13.3838 | -0.2857 |
| CHB | CSH | 11400290 | 7.3995  | 11.1814 | -1.0226 |
| CHB | CSH | 11405290 | 10.0221 | 11.012  | -0.2715 |
| CHB | CSH | 11410290 | 13.4401 | 11.8591 | 0.4045  |
| CHB | CSH | 11415290 | 8.4333  | 8.4708  | -0.0131 |
| CHB | CSH | 11420290 | 4.7322  | 6.2684  | -0.7075 |
| CHB | CSH | 11425290 | 6.8765  | 7.7931  | -0.3464 |
| CHB | CSH | 11430290 | 7.8348  | 9.1484  | -0.4283 |
| CHB | CSH | 11435290 | 5.9197  | 9.1484  | -1.0527 |

## 2\_TajimasD\_data

|     |     |          |         |         |         |
|-----|-----|----------|---------|---------|---------|
| CHB | CSH | 11440290 | 4.2012  | 8.3013  | -1.4623 |
| CHB | CSH | 11445290 | 3.9819  | 9.3178  | -1.7104 |
| CHB | CSH | 11450290 | 3.1243  | 8.6402  | -1.896  |
| CHB | CSH | 11455290 | 2.696   | 6.2684  | -1.6453 |
| CHB | CSH | 11460290 | 2.4727  | 5.7601  | -1.6333 |
| CHB | CSH | 11465290 | 3.2237  | 6.946   | -1.5625 |
| CHB | CSH | 11470290 | 4.3718  | 8.1319  | -1.3667 |
| CHB | CSH | 11475290 | 3.9983  | 7.1154  | -1.2801 |
| CHB | CSH | 11480290 | 3.8315  | 7.1154  | -1.3486 |
| CHB | CSH | 11485290 | 2.451   | 4.5742  | -1.2929 |
| CHB | CSH | 11490290 | 0.7154  | 3.0495  | -2.0073 |
| CHB | CSH | 11495290 | 2.9515  | 6.0989  | -1.4857 |
| CHB | CSH | 11500290 | 6.1157  | 9.1484  | -0.9888 |
| CHB | CSH | 11505290 | 13.2629 | 13.045  | 0.051   |
| CHB | CSH | 11510290 | 14.8308 | 12.5367 | 0.557   |
| CHB | CSH | 11515290 | 6.7559  | 8.3013  | -0.5512 |
| CHB | CSH | 11520290 | 6.406   | 8.1319  | -0.6273 |
| CHB | CSH | 11525290 | 7.4339  | 9.1484  | -0.559  |
| CHB | CSH | 11530290 | 3.5452  | 8.6402  | -1.7513 |
| CHB | CSH | 11535290 | 4.5387  | 16.4333 | -2.2328 |
| CHB | CSH | 11540290 | 7.6891  | 16.9415 | -1.6869 |
| CHB | CSH | 11545290 | 5.8338  | 10.3343 | -1.31   |
| CHB | CSH | 11550290 | 3.151   | 11.1814 | -2.1713 |
| CHB | CSH | 11555290 | 3.6004  | 11.3508 | -2.0663 |
| CHB | CSH | 11560290 | 4.2658  | 9.9955  | -1.7205 |
| CHB | CSH | 11565290 | 3.7333  | 9.8261  | -1.8589 |
| CHB | CSH | 11570290 | 4.1371  | 12.5367 | -2.0393 |
| CHB | CSH | 11575290 | 4.889   | 13.7226 | -1.9688 |
| CHB | CSH | 11580290 | 5.6246  | 12.5367 | -1.6781 |
| CHB | CSH | 11585290 | 4.8367  | 9.8261  | -1.5223 |
| CHB | CSH | 11590290 | 3.0664  | 7.1154  | -1.6628 |
| CHB | CSH | 11595290 | 4.3151  | 9.3178  | -1.6036 |
| CHB | CSH | 11600290 | 5.6705  | 12.0285 | -1.6051 |
| CHB | CSH | 11605290 | 5.6107  | 11.1814 | -1.5063 |
| CHB | CSH | 11610290 | 6.7167  | 11.6896 | -1.2896 |
| CHB | CSH | 11615290 | 6.7567  | 10.5037 | -1.0743 |
| CHB | CSH | 11620290 | 5.2915  | 10.1649 | -1.4406 |
| CHB | CSH | 11625290 | 5.8982  | 11.6896 | -1.5019 |
| CHB | CSH | 11630290 | 4.4304  | 8.979   | -1.5089 |
| CHB | CSH | 11635290 | 2.2905  | 6.6072  | -1.8959 |
| CHB | CSH | 11640290 | 3.7864  | 8.3013  | -1.6102 |
| CHB | CSH | 11645290 | 5.5791  | 10.6731 | -1.4387 |
| CHB | CSH | 11650290 | 6.449   | 13.045  | -1.5424 |
| CHB | CSH | 11655290 | 6.2411  | 13.892  | -1.6855 |
| CHB | CSH | 11660290 | 7.762   | 14.0615 | -1.3719 |
| CHB | CSH | 11665290 | 6.6322  | 10.6731 | -1.1413 |
| CHB | CSH | 11670290 | 5.004   | 7.9625  | -1.0963 |
| CHB | CSH | 11675290 | 8.0977  | 10.6731 | -0.7274 |
| CHB | CSH | 11680290 | 11.8152 | 13.3838 | -0.358  |

## 2\_TajimasD\_data

|     |     |          |         |         |         |
|-----|-----|----------|---------|---------|---------|
| CHB | CSH | 11685290 | 10.1308 | 12.3673 | -0.55   |
| CHB | CSH | 11690290 | 9.8846  | 11.5202 | -0.43   |
| CHB | CSH | 11695290 | 11.2842 | 12.8755 | -0.3767 |
| CHB | CSH | 11700290 | 12.821  | 13.5532 | -0.1651 |
| CHB | CSH | 11705290 | 14.378  | 11.6896 | 0.6972  |
| CHB | CSH | 11710290 | 12.3204 | 9.8261  | 0.761   |
| CHB | CSH | 11715290 | 12.0253 | 10.5037 | 0.4362  |
| CHB | CSH | 11720290 | 9.3491  | 9.4872  | -0.0435 |
| CHB | CSH | 11725290 | 10.324  | 8.8096  | 0.5113  |
| CHB | CSH | 11730290 | 19.1864 | 11.8591 | 1.8746  |
| CHB | CSH | 11735290 | 18.8426 | 15.4168 | 0.6835  |
| CHB | CSH | 11740290 | 8.2871  | 11.012  | -0.7474 |
| CHB | CSH | 11745290 | 3.6166  | 7.7931  | -1.5785 |
| CHB | CSH | 11750290 | 5.5237  | 10.6731 | -1.4544 |
| CHB | CSH | 11755290 | 6.6404  | 11.6896 | -1.3094 |
| CHB | CSH | 11760290 | 5.5271  | 9.8261  | -1.3116 |
| CHB | CSH | 11765290 | 7.8622  | 10.1649 | -0.6807 |
| CHB | CSH | 11770290 | 14.6526 | 12.7061 | 0.4666  |
| CHB | CSH | 11775290 | 13.5618 | 11.5202 | 0.5368  |
| CHB | CSH | 11780290 | 5.7179  | 9.3178  | -1.1539 |
| CHB | CSH | 11785290 | 5.3861  | 16.6027 | -2.085  |
| CHB | CSH | 11790290 | 6.262   | 17.7886 | -2.0056 |
| CHB | CSH | 11795290 | 5.7625  | 10.1649 | -1.3014 |
| CHB | CSH | 11800290 | 5.9048  | 10.1649 | -1.2593 |
| CHB | CSH | 11805290 | 5.5226  | 9.6567  | -1.2819 |
| CHB | CSH | 11810290 | 5.5989  | 8.979   | -1.1213 |
| CHB | CSH | 11815290 | 4.9952  | 8.6402  | -1.2529 |
| CHB | CSH | 11820290 | 8.3497  | 9.6567  | -0.4053 |
| CHB | CSH | 11825290 | 9.6097  | 9.8261  | -0.066  |
| CHB | CSH | 11830290 | 6.7923  | 7.2848  | -0.198  |
| CHB | CSH | 11835290 | 7.2989  | 9.6567  | -0.7311 |
| CHB | CSH | 11840290 | 7.2983  | 9.4872  | -0.69   |
| CHB | CSH | 11845290 | 7.0197  | 9.1484  | -0.694  |
| CHB | CSH | 11850290 | 6.3369  | 12.7061 | -1.5269 |
| CHB | CSH | 11855290 | 5.7725  | 17.4498 | -2.0696 |
| CHB | CSH | 11860290 | 5.0815  | 16.4333 | -2.1309 |
| CHB | CSH | 11865290 | 3.2893  | 11.8591 | -2.1925 |
| CHB | CSH | 11870290 | 16.0919 | 15.0779 | 0.2066  |
| CHB | CSH | 11875290 | 18.1063 | 15.7556 | 0.4594  |
| CHB | CSH | 11880290 | 30.6989 | 20.3298 | 1.5867  |
| CHB | CSH | 11885290 | 33.087  | 18.8051 | 2.3558  |
| CHB | CSH | 11890290 | 10.7952 | 8.8096  | 0.6704  |
| CHB | CSH | 11895290 | 9.8796  | 8.3013  | 0.5629  |
| CHB | CSH | 11900290 | 10.1964 | 9.1484  | 0.3417  |
| CHB | CSH | 11905290 | 11.3107 | 7.7931  | 1.3295  |
| CHB | CSH | 11910290 | 12.633  | 9.4872  | 0.9916  |
| CHB | CSH | 11915290 | 8.1315  | 9.1484  | -0.3315 |
| CHB | CSH | 11920290 | 6.2467  | 6.946   | -0.2935 |
| CHB | CSH | 11925290 | 7.5431  | 8.6402  | -0.3771 |

## 2\_TajimasD\_data

|     |     |          |         |         |         |
|-----|-----|----------|---------|---------|---------|
| CHB | CSH | 11930290 | 7.1007  | 10.1649 | -0.9058 |
| CHB | CSH | 11935290 | 11.9642 | 12.1979 | -0.0582 |
| CHB | CSH | 11940290 | 16.3666 | 13.892  | 0.5452  |
| CHB | CSH | 11945290 | 13.5856 | 12.5367 | 0.2547  |
| YRI | CSH | 10940290 | 4.2831  | 10.4199 | -1.7666 |
| YRI | CSH | 10945290 | 4.9249  | 10.4199 | -1.5818 |
| YRI | CSH | 10950290 | 5.9372  | 9.5795  | -1.134  |
| YRI | CSH | 10955290 | 5.2265  | 8.235   | -1.0772 |
| YRI | CSH | 10960290 | 6.0112  | 10.924  | -1.3531 |
| YRI | CSH | 10965290 | 6.8912  | 12.2685 | -1.3279 |
| YRI | CSH | 10970290 | 5.0072  | 12.1005 | -1.7746 |
| YRI | CSH | 10975290 | 4.6501  | 11.9324 | -1.846  |
| YRI | CSH | 10980290 | 4.5598  | 11.0921 | -1.7736 |
| YRI | CSH | 10985290 | 5.0802  | 10.756  | -1.5861 |
| YRI | CSH | 10990290 | 4.6012  | 10.924  | -1.7414 |
| YRI | CSH | 10995290 | 3.7772  | 12.7727 | -2.1385 |
| YRI | CSH | 11000290 | 4.9039  | 13.1089 | -1.9033 |
| YRI | CSH | 11005290 | 4.9518  | 11.9324 | -1.7696 |
| YRI | CSH | 11010290 | 4.4895  | 10.5879 | -1.7295 |
| YRI | CSH | 11015290 | 4.6134  | 9.7476  | -1.5728 |
| YRI | CSH | 11020290 | 4.891   | 10.0837 | -1.5413 |
| YRI | CSH | 11025290 | 4.5162  | 10.0837 | -1.6525 |
| YRI | CSH | 11030290 | 3.5067  | 10.2518 | -1.9714 |
| YRI | CSH | 11035290 | 2.6473  | 10.5879 | -2.2519 |
| YRI | CSH | 11040290 | 5.4888  | 13.1089 | -1.7676 |
| YRI | CSH | 11045290 | 7.17    | 13.2769 | -1.3996 |
| YRI | CSH | 11050290 | 6.5129  | 11.4282 | -1.2977 |
| YRI | CSH | 11055290 | 6.3885  | 10.4199 | -1.1605 |
| YRI | CSH | 11060290 | 6.9357  | 9.0754  | -0.7004 |
| YRI | CSH | 11065290 | 12.7781 | 12.2685 | 0.1258  |
| YRI | CSH | 11070290 | 13.5132 | 12.9408 | 0.1344  |
| YRI | CSH | 11075290 | 7.9226  | 11.5963 | -0.9567 |
| YRI | CSH | 11080290 | 6.0646  | 11.7644 | -1.4643 |
| YRI | CSH | 11085290 | 6.8771  | 11.4282 | -1.2015 |
| YRI | CSH | 11090290 | 5.6196  | 10.0837 | -1.325  |
| YRI | CSH | 11095290 | 3.4245  | 10.2518 | -1.9954 |
| YRI | CSH | 11100290 | 3.4112  | 11.2602 | -2.1012 |
| YRI | CSH | 11105290 | 5.0696  | 10.756  | -1.589  |
| YRI | CSH | 11110290 | 7.8883  | 12.4366 | -1.1089 |
| YRI | CSH | 11115290 | 7.5639  | 11.4282 | -1.0202 |
| YRI | CSH | 11120290 | 3.7493  | 9.2434  | -1.7682 |
| YRI | CSH | 11125290 | 4.4297  | 10.756  | -1.7679 |
| YRI | CSH | 11130290 | 6.365   | 9.7476  | -1.0362 |
| YRI | CSH | 11135290 | 6.3832  | 9.2434  | -0.9205 |
| YRI | CSH | 11140290 | 5.7388  | 10.924  | -1.4281 |
| YRI | CSH | 11145290 | 5.3484  | 11.5963 | -1.627  |
| YRI | CSH | 11150290 | 5.8489  | 11.2602 | -1.4486 |
| YRI | CSH | 11155290 | 6.6702  | 13.7811 | -1.5731 |
| YRI | CSH | 11160290 | 9.9207  | 16.9743 | -1.2793 |

## 2\_TajimasD\_data

|     |     |          |         |         |         |
|-----|-----|----------|---------|---------|---------|
| YRI | CSH | 11165290 | 14.7345 | 18.991  | -0.6932 |
| YRI | CSH | 11170290 | 15.3791 | 19.9994 | -0.7159 |
| YRI | CSH | 11175290 | 13.6872 | 18.4868 | -0.8021 |
| YRI | CSH | 11180290 | 11.4066 | 14.9575 | -0.7267 |
| YRI | CSH | 11185290 | 15.9916 | 18.823  | -0.465  |
| YRI | CSH | 11190290 | 22.6333 | 23.8648 | -0.1609 |
| YRI | CSH | 11195290 | 14.9938 | 17.1423 | -0.386  |
| YRI | CSH | 11200290 | 7.8015  | 13.1089 | -1.2311 |
| YRI | CSH | 11205290 | 7.6297  | 14.9575 | -1.4997 |
| YRI | CSH | 11210290 | 7.5828  | 14.2853 | -1.4331 |
| YRI | CSH | 11215290 | 6.2663  | 10.5879 | -1.2256 |
| YRI | CSH | 11220290 | 8.8179  | 12.6047 | -0.9116 |
| YRI | CSH | 11225290 | 19.4995 | 19.8313 | -0.0518 |
| YRI | CSH | 11230290 | 22.8421 | 21.512  | 0.1921  |
| YRI | CSH | 11235290 | 20.7492 | 19.1591 | 0.2568  |
| YRI | CSH | 11240290 | 24.0197 | 19.4952 | 0.7185  |
| YRI | CSH | 11245290 | 25.052  | 22.6884 | 0.3242  |
| YRI | CSH | 11250290 | 16.4771 | 18.823  | -0.3853 |
| YRI | CSH | 11255290 | 13.7748 | 16.8062 | -0.5551 |
| YRI | CSH | 11260290 | 21.7779 | 21.512  | 0.0384  |
| YRI | CSH | 11265290 | 23.8329 | 21.512  | 0.3352  |
| YRI | CSH | 11270290 | 21.9457 | 21.68   | 0.0381  |
| YRI | CSH | 11275290 | 19.4623 | 20.1675 | -0.1084 |
| YRI | CSH | 11280290 | 15.1304 | 17.9827 | -0.4895 |
| YRI | CSH | 11285290 | 10.9681 | 17.8146 | -1.1856 |
| YRI | CSH | 11290290 | 12.184  | 19.1591 | -1.1263 |
| YRI | CSH | 11295290 | 17.0754 | 21.0078 | -0.581  |
| YRI | CSH | 11300290 | 15.8729 | 17.8146 | -0.3362 |
| YRI | CSH | 11305290 | 11.625  | 14.1172 | -0.5389 |
| YRI | CSH | 11310290 | 9.5144  | 13.1089 | -0.8338 |
| YRI | CSH | 11315290 | 9.7431  | 13.1089 | -0.7808 |
| YRI | CSH | 11320290 | 11.5882 | 13.7811 | -0.4851 |
| YRI | CSH | 11325290 | 14.8501 | 15.2937 | -0.0889 |
| YRI | CSH | 11330290 | 15.1593 | 14.1172 | 0.2253  |
| YRI | CSH | 11335290 | 11.4056 | 13.1089 | -0.3951 |
| YRI | CSH | 11340290 | 11.9161 | 13.9492 | -0.4446 |
| YRI | CSH | 11345290 | 12.7639 | 13.7811 | -0.225  |
| YRI | CSH | 11350290 | 9.5819  | 14.7895 | -1.0773 |
| YRI | CSH | 11355290 | 7.2007  | 13.1089 | -1.3705 |
| YRI | CSH | 11360290 | 7.9104  | 12.2685 | -1.0762 |
| YRI | CSH | 11365290 | 12.1305 | 14.7895 | -0.5501 |
| YRI | CSH | 11370290 | 13.6766 | 14.4534 | -0.1643 |
| YRI | CSH | 11375290 | 12.7547 | 13.9492 | -0.2612 |
| YRI | CSH | 11380290 | 24.1752 | 21.0078 | 0.468   |
| YRI | CSH | 11385290 | 33.6675 | 24.5371 | 1.1609  |
| YRI | CSH | 11390290 | 29.4682 | 21.512  | 1.149   |
| YRI | CSH | 11395290 | 25.1386 | 21.8481 | 0.4681  |
| YRI | CSH | 11400290 | 22.9264 | 21.0078 | 0.2835  |
| YRI | CSH | 11405290 | 20.8019 | 18.4868 | 0.3869  |



## 2\_TajimasD\_data

|     |     |          |         |         |         |
|-----|-----|----------|---------|---------|---------|
| YRI | CSH | 11410290 | 19.9183 | 17.3104 | 0.4642  |
| YRI | CSH | 11415290 | 13.953  | 15.2937 | -0.2686 |
| YRI | CSH | 11420290 | 7.4476  | 10.2518 | -0.8196 |
| YRI | CSH | 11425290 | 9.4093  | 9.9157  | -0.1527 |
| YRI | CSH | 11430290 | 14.242  | 15.1256 | -0.1789 |
| YRI | CSH | 11435290 | 17.8576 | 17.6465 | 0.0369  |
| YRI | CSH | 11440290 | 14.9333 | 14.6214 | 0.0652  |
| YRI | CSH | 11445290 | 12.1732 | 14.2853 | -0.4516 |
| YRI | CSH | 11450290 | 11.3964 | 15.4617 | -0.8061 |
| YRI | CSH | 11455290 | 7.4144  | 12.2685 | -1.1987 |
| YRI | CSH | 11460290 | 5.1741  | 9.7476  | -1.401  |
| YRI | CSH | 11465290 | 5.8223  | 10.924  | -1.4051 |
| YRI | CSH | 11470290 | 6.2899  | 12.4366 | -1.4986 |
| YRI | CSH | 11475290 | 5.734   | 11.0921 | -1.4548 |
| YRI | CSH | 11480290 | 5.6276  | 12.1005 | -1.6194 |
| YRI | CSH | 11485290 | 3.943   | 10.0837 | -1.8227 |
| YRI | CSH | 11490290 | 2.5011  | 7.7309  | -1.9843 |
| YRI | CSH | 11495290 | 6.5583  | 9.9157  | -1.0123 |
| YRI | CSH | 11500290 | 9.3658  | 11.7644 | -0.6162 |
| YRI | CSH | 11505290 | 18.3886 | 16.134  | 0.4293  |
| YRI | CSH | 11510290 | 22.6354 | 17.4785 | 0.9095  |
| YRI | CSH | 11515290 | 10.78   | 14.1172 | -0.7216 |
| YRI | CSH | 11520290 | 6.8229  | 13.613  | -1.5198 |
| YRI | CSH | 11525290 | 7.8211  | 13.7811 | -1.3185 |
| YRI | CSH | 11530290 | 6.7999  | 12.4366 | -1.3742 |
| YRI | CSH | 11535290 | 21.5697 | 24.0329 | -0.3196 |
| YRI | CSH | 11540290 | 24.9711 | 25.8816 | -0.1099 |
| YRI | CSH | 11545290 | 10.1927 | 14.7895 | -0.9509 |
| YRI | CSH | 11550290 | 5.2904  | 12.7727 | -1.7788 |
| YRI | CSH | 11555290 | 5.0146  | 10.756  | -1.6044 |
| YRI | CSH | 11560290 | 6.0633  | 10.756  | -1.3114 |
| YRI | CSH | 11565290 | 10.4345 | 14.6214 | -0.8756 |
| YRI | CSH | 11570290 | 19.4544 | 18.1507 | 0.2217  |
| YRI | CSH | 11575290 | 22.8879 | 18.823  | 0.6676  |
| YRI | CSH | 11580290 | 15.6195 | 16.8062 | -0.2173 |
| YRI | CSH | 11585290 | 9.4213  | 12.4366 | -0.7351 |
| YRI | CSH | 11590290 | 8.0211  | 9.0754  | -0.3451 |
| YRI | CSH | 11595290 | 11.0474 | 12.9408 | -0.4446 |
| YRI | CSH | 11600290 | 11.8918 | 16.134  | -0.8077 |
| YRI | CSH | 11605290 | 10.3727 | 15.2937 | -0.986  |
| YRI | CSH | 11610290 | 12.8767 | 16.302  | -0.6457 |
| YRI | CSH | 11615290 | 11.6012 | 12.1005 | -0.1249 |
| YRI | CSH | 11620290 | 12.0157 | 10.0837 | 0.5734  |
| YRI | CSH | 11625290 | 15.6335 | 14.4534 | 0.2495  |
| YRI | CSH | 11630290 | 12.2557 | 13.9492 | -0.3704 |
| YRI | CSH | 11635290 | 7.2028  | 11.4282 | -1.1155 |
| YRI | CSH | 11640290 | 9.2615  | 12.1005 | -0.7103 |
| YRI | CSH | 11645290 | 10.963  | 14.2853 | -0.7103 |
| YRI | CSH | 11650290 | 12.3764 | 17.9827 | -0.9621 |

## 2\_TajimasD\_data

|     |     |          |         |         |         |
|-----|-----|----------|---------|---------|---------|
| YRI | CSH | 11655290 | 12.527  | 17.8146 | -0.9156 |
| YRI | CSH | 11660290 | 12.6546 | 17.8146 | -0.8935 |
| YRI | CSH | 11665290 | 10.9357 | 14.2853 | -0.7162 |
| YRI | CSH | 11670290 | 9.8814  | 11.2602 | -0.3691 |
| YRI | CSH | 11675290 | 12.3776 | 14.2853 | -0.4079 |
| YRI | CSH | 11680290 | 14.3274 | 16.6382 | -0.4272 |
| YRI | CSH | 11685290 | 12.0607 | 15.2937 | -0.6478 |
| YRI | CSH | 11690290 | 10.2344 | 13.7811 | -0.7846 |
| YRI | CSH | 11695290 | 9.8796  | 15.4617 | -1.1069 |
| YRI | CSH | 11700290 | 12.5041 | 16.302  | -0.716  |
| YRI | CSH | 11705290 | 16.7247 | 18.4868 | -0.2945 |
| YRI | CSH | 11710290 | 15.6269 | 17.4785 | -0.3265 |
| YRI | CSH | 11715290 | 14.5827 | 13.7811 | 0.1773  |
| YRI | CSH | 11720290 | 12.019  | 14.6214 | -0.5442 |
| YRI | CSH | 11725290 | 12.3446 | 17.1423 | -0.862  |
| YRI | CSH | 11730290 | 18.1722 | 18.823  | -0.1069 |
| YRI | CSH | 11735290 | 21.8737 | 18.991  | 0.4694  |
| YRI | CSH | 11740290 | 13.8491 | 14.4534 | -0.1278 |
| YRI | CSH | 11745290 | 7.6225  | 12.2685 | -1.1473 |
| YRI | CSH | 11750290 | 12.0008 | 15.7978 | -0.7376 |
| YRI | CSH | 11755290 | 14.6046 | 17.8146 | -0.5559 |
| YRI | CSH | 11760290 | 12.8054 | 14.6214 | -0.3798 |
| YRI | CSH | 11765290 | 11.9184 | 14.4534 | -0.536  |
| YRI | CSH | 11770290 | 15.2214 | 18.4868 | -0.5457 |
| YRI | CSH | 11775290 | 16.2276 | 16.4701 | -0.0453 |
| YRI | CSH | 11780290 | 13.6423 | 14.1172 | -0.1027 |
| YRI | CSH | 11785290 | 21.7787 | 21.68   | 0.0141  |
| YRI | CSH | 11790290 | 21.5108 | 22.0162 | -0.0714 |
| YRI | CSH | 11795290 | 11.9485 | 14.7895 | -0.5877 |
| YRI | CSH | 11800290 | 12.8875 | 14.7895 | -0.3935 |
| YRI | CSH | 11805290 | 12.1554 | 14.6214 | -0.5157 |
| YRI | CSH | 11810290 | 10.9659 | 13.1089 | -0.4971 |
| YRI | CSH | 11815290 | 10.7165 | 12.7727 | -0.4888 |
| YRI | CSH | 11820290 | 11.1701 | 14.2853 | -0.6661 |
| YRI | CSH | 11825290 | 9.845   | 15.1256 | -1.0693 |
| YRI | CSH | 11830290 | 6.3024  | 12.7727 | -1.5382 |
| YRI | CSH | 11835290 | 12.1577 | 13.613  | -0.3257 |
| YRI | CSH | 11840290 | 12.9293 | 14.2853 | -0.2899 |
| YRI | CSH | 11845290 | 10.8539 | 14.1172 | -0.7056 |
| YRI | CSH | 11850290 | 18.7371 | 17.1423 | 0.2865  |
| YRI | CSH | 11855290 | 30.8233 | 22.0162 | 1.2437  |
| YRI | CSH | 11860290 | 29.7846 | 19.6633 | 1.594   |
| YRI | CSH | 11865290 | 23.2247 | 15.4617 | 1.5393  |
| YRI | CSH | 11870290 | 29.3862 | 21.0078 | 1.238   |
| YRI | CSH | 11875290 | 24.5569 | 21.1758 | 0.4958  |
| YRI | CSH | 11880290 | 32.068  | 24.369  | 0.9854  |
| YRI | CSH | 11885290 | 29.2697 | 22.8565 | 0.8734  |
| YRI | CSH | 11890290 | 10.4884 | 13.2769 | -0.6391 |
| YRI | CSH | 11895290 | 11.2853 | 13.2769 | -0.4564 |

## 2\_TajimasD\_data

|     |     |          |         |         |         |
|-----|-----|----------|---------|---------|---------|
| YRI | CSH | 11900290 | 12.8405 | 13.2769 | -0.1    |
| YRI | CSH | 11905290 | 13.777  | 11.0921 | 0.729   |
| YRI | CSH | 11910290 | 13.0123 | 11.5963 | 0.3687  |
| YRI | CSH | 11915290 | 8.6767  | 10.4199 | -0.5018 |
| YRI | CSH | 11920290 | 7.881   | 10.0837 | -0.6538 |
| YRI | CSH | 11925290 | 10.4412 | 12.4366 | -0.4865 |
| YRI | CSH | 11930290 | 11.8099 | 14.9575 | -0.6442 |
| YRI | CSH | 11935290 | 19.4178 | 18.1507 | 0.2155  |
| YRI | CSH | 11940290 | 24.0197 | 17.9827 | 1.036   |
| YRI | CSH | 11945290 | 19.8207 | 16.134  | 0.7019  |
| CEU | CSH | 58003333 | 0       | 0       | 0       |
| CEU | CSH | 58008333 | 0       | 0       | 0       |
| CEU | CSH | 58013333 | 0       | 0       | 0       |
| CEU | CSH | 58018333 | 0       | 0       | 0       |
| CEU | CSH | 58023333 | 0       | 0       | 0       |
| CEU | CSH | 58028333 | 0       | 0       | 0       |
| CEU | CSH | 58033333 | 0       | 0       | 0       |
| CEU | CSH | 58038333 | 0       | 0       | 0       |
| CEU | CSH | 58043333 | 0       | 0       | 0       |
| CEU | CSH | 58048333 | 0       | 0       | 0       |
| CEU | CSH | 58053333 | 0       | 0       | 0       |
| CEU | CSH | 58058333 | 0       | 0       | 0       |
| CEU | CSH | 58063333 | 0       | 0       | 0       |
| CEU | CSH | 58068333 | 0       | 0       | 0       |
| CEU | CSH | 58073333 | 0       | 0       | 0       |
| CEU | CSH | 58078333 | 0       | 0       | 0       |
| CEU | CSH | 58083333 | 0       | 0       | 0       |
| CEU | CSH | 58088333 | 0       | 0       | 0       |
| CEU | CSH | 58093333 | 0       | 0       | 0       |
| CEU | CSH | 58098333 | 0       | 0       | 0       |
| CEU | CSH | 58103333 | 0       | 0       | 0       |
| CEU | CSH | 58108333 | 0       | 0       | 0       |
| CEU | CSH | 58113333 | 0       | 0       | 0       |
| CEU | CSH | 58118333 | 0       | 0       | 0       |
| CEU | CSH | 58123333 | 0       | 0       | 0       |
| CEU | CSH | 58128333 | 0       | 0       | 0       |
| CEU | CSH | 58133333 | 0       | 0       | 0       |
| CEU | CSH | 58138333 | 0       | 0       | 0       |
| CEU | CSH | 58143333 | 0       | 0       | 0       |
| CEU | CSH | 58148333 | 0       | 0       | 0       |
| CEU | CSH | 58153333 | 0       | 0       | 0       |
| CEU | CSH | 58158333 | 0       | 0       | 0       |
| CEU | CSH | 58163333 | 0       | 0       | 0       |
| CEU | CSH | 58168333 | 0       | 0       | 0       |
| CEU | CSH | 58173333 | 0       | 0       | 0       |
| CEU | CSH | 58178333 | 0       | 0       | 0       |
| CEU | CSH | 58183333 | 0       | 0       | 0       |
| CEU | CSH | 58188333 | 0       | 0       | 0       |
| CEU | CSH | 58193333 | 0       | 0       | 0       |

## 2\_TajimasD\_data

|     |     |          |   |   |   |
|-----|-----|----------|---|---|---|
| CEU | CSH | 58198333 | 0 | 0 | 0 |
| CEU | CSH | 58203333 | 0 | 0 | 0 |
| CEU | CSH | 58208333 | 0 | 0 | 0 |
| CEU | CSH | 58213333 | 0 | 0 | 0 |
| CEU | CSH | 58218333 | 0 | 0 | 0 |
| CEU | CSH | 58223333 | 0 | 0 | 0 |
| CEU | CSH | 58228333 | 0 | 0 | 0 |
| CEU | CSH | 58233333 | 0 | 0 | 0 |
| CEU | CSH | 58238333 | 0 | 0 | 0 |
| CEU | CSH | 58243333 | 0 | 0 | 0 |
| CEU | CSH | 58248333 | 0 | 0 | 0 |
| CEU | CSH | 58253333 | 0 | 0 | 0 |
| CEU | CSH | 58258333 | 0 | 0 | 0 |
| CEU | CSH | 58263333 | 0 | 0 | 0 |
| CEU | CSH | 58268333 | 0 | 0 | 0 |
| CEU | CSH | 58273333 | 0 | 0 | 0 |
| CEU | CSH | 58278333 | 0 | 0 | 0 |
| CEU | CSH | 58283333 | 0 | 0 | 0 |
| CEU | CSH | 58288333 | 0 | 0 | 0 |
| CEU | CSH | 58293333 | 0 | 0 | 0 |
| CEU | CSH | 58298333 | 0 | 0 | 0 |
| CEU | CSH | 58303333 | 0 | 0 | 0 |
| CEU | CSH | 58308333 | 0 | 0 | 0 |
| CEU | CSH | 58313333 | 0 | 0 | 0 |
| CEU | CSH | 58318333 | 0 | 0 | 0 |
| CEU | CSH | 58323333 | 0 | 0 | 0 |
| CEU | CSH | 58328333 | 0 | 0 | 0 |
| CEU | CSH | 58333333 | 0 | 0 | 0 |
| CEU | CSH | 58338333 | 0 | 0 | 0 |
| CEU | CSH | 58343333 | 0 | 0 | 0 |
| CEU | CSH | 58348333 | 0 | 0 | 0 |
| CEU | CSH | 58353333 | 0 | 0 | 0 |
| CEU | CSH | 58358333 | 0 | 0 | 0 |
| CEU | CSH | 58363333 | 0 | 0 | 0 |
| CEU | CSH | 58368333 | 0 | 0 | 0 |
| CEU | CSH | 58373333 | 0 | 0 | 0 |
| CEU | CSH | 58378333 | 0 | 0 | 0 |
| CEU | CSH | 58383333 | 0 | 0 | 0 |
| CEU | CSH | 58388333 | 0 | 0 | 0 |
| CEU | CSH | 58393333 | 0 | 0 | 0 |
| CEU | CSH | 58398333 | 0 | 0 | 0 |
| CEU | CSH | 58403333 | 0 | 0 | 0 |
| CEU | CSH | 58408333 | 0 | 0 | 0 |
| CEU | CSH | 58413333 | 0 | 0 | 0 |
| CEU | CSH | 58418333 | 0 | 0 | 0 |
| CEU | CSH | 58423333 | 0 | 0 | 0 |
| CEU | CSH | 58428333 | 0 | 0 | 0 |
| CEU | CSH | 58433333 | 0 | 0 | 0 |
| CEU | CSH | 58438333 | 0 | 0 | 0 |

## 2\_TajimasD\_data

|     |     |          |   |   |   |
|-----|-----|----------|---|---|---|
| CEU | CSH | 58443333 | 0 | 0 | 0 |
| CEU | CSH | 58448333 | 0 | 0 | 0 |
| CEU | CSH | 58453333 | 0 | 0 | 0 |
| CEU | CSH | 58458333 | 0 | 0 | 0 |
| CEU | CSH | 58463333 | 0 | 0 | 0 |
| CEU | CSH | 58468333 | 0 | 0 | 0 |
| CEU | CSH | 58473333 | 0 | 0 | 0 |
| CEU | CSH | 58478333 | 0 | 0 | 0 |
| CEU | CSH | 58483333 | 0 | 0 | 0 |
| CEU | CSH | 58488333 | 0 | 0 | 0 |
| CEU | CSH | 58493333 | 0 | 0 | 0 |
| CEU | CSH | 58498333 | 0 | 0 | 0 |
| CEU | CSH | 58503333 | 0 | 0 | 0 |
| CEU | CSH | 58508333 | 0 | 0 | 0 |
| CEU | CSH | 58513333 | 0 | 0 | 0 |
| CEU | CSH | 58518333 | 0 | 0 | 0 |
| CEU | CSH | 58523333 | 0 | 0 | 0 |
| CEU | CSH | 58528333 | 0 | 0 | 0 |
| CEU | CSH | 58533333 | 0 | 0 | 0 |
| CEU | CSH | 58538333 | 0 | 0 | 0 |
| CEU | CSH | 58543333 | 0 | 0 | 0 |
| CEU | CSH | 58548333 | 0 | 0 | 0 |
| CEU | CSH | 58553333 | 0 | 0 | 0 |
| CEU | CSH | 58558333 | 0 | 0 | 0 |
| CEU | CSH | 58563333 | 0 | 0 | 0 |
| CEU | CSH | 58568333 | 0 | 0 | 0 |
| CEU | CSH | 58573333 | 0 | 0 | 0 |
| CEU | CSH | 58578333 | 0 | 0 | 0 |
| CEU | CSH | 58583333 | 0 | 0 | 0 |
| CEU | CSH | 58588333 | 0 | 0 | 0 |
| CEU | CSH | 58593333 | 0 | 0 | 0 |
| CEU | CSH | 58598333 | 0 | 0 | 0 |
| CEU | CSH | 58603333 | 0 | 0 | 0 |
| CEU | CSH | 58608333 | 0 | 0 | 0 |
| CEU | CSH | 58613333 | 0 | 0 | 0 |
| CEU | CSH | 58618333 | 0 | 0 | 0 |
| CEU | CSH | 58623333 | 0 | 0 | 0 |
| CEU | CSH | 58628333 | 0 | 0 | 0 |
| CEU | CSH | 58633333 | 0 | 0 | 0 |
| CEU | CSH | 58638333 | 0 | 0 | 0 |
| CEU | CSH | 58643333 | 0 | 0 | 0 |
| CEU | CSH | 58648333 | 0 | 0 | 0 |
| CEU | CSH | 58653333 | 0 | 0 | 0 |
| CEU | CSH | 58658333 | 0 | 0 | 0 |
| CEU | CSH | 58663333 | 0 | 0 | 0 |
| CEU | CSH | 58668333 | 0 | 0 | 0 |
| CEU | CSH | 58673333 | 0 | 0 | 0 |
| CEU | CSH | 58678333 | 0 | 0 | 0 |
| CEU | CSH | 58683333 | 0 | 0 | 0 |

## 2\_TajimasD\_data

|     |     |          |   |   |   |
|-----|-----|----------|---|---|---|
| CEU | CSH | 58688333 | 0 | 0 | 0 |
| CEU | CSH | 58693333 | 0 | 0 | 0 |
| CEU | CSH | 58698333 | 0 | 0 | 0 |
| CEU | CSH | 58703333 | 0 | 0 | 0 |
| CEU | CSH | 58708333 | 0 | 0 | 0 |
| CEU | CSH | 58713333 | 0 | 0 | 0 |
| CEU | CSH | 58718333 | 0 | 0 | 0 |
| CEU | CSH | 58723333 | 0 | 0 | 0 |
| CEU | CSH | 58728333 | 0 | 0 | 0 |
| CEU | CSH | 58733333 | 0 | 0 | 0 |
| CEU | CSH | 58738333 | 0 | 0 | 0 |
| CEU | CSH | 58743333 | 0 | 0 | 0 |
| CEU | CSH | 58748333 | 0 | 0 | 0 |
| CEU | CSH | 58753333 | 0 | 0 | 0 |
| CEU | CSH | 58758333 | 0 | 0 | 0 |
| CEU | CSH | 58763333 | 0 | 0 | 0 |
| CEU | CSH | 58768333 | 0 | 0 | 0 |
| CEU | CSH | 58773333 | 0 | 0 | 0 |
| CEU | CSH | 58778333 | 0 | 0 | 0 |
| CEU | CSH | 58783333 | 0 | 0 | 0 |
| CEU | CSH | 58788333 | 0 | 0 | 0 |
| CEU | CSH | 58793333 | 0 | 0 | 0 |
| CEU | CSH | 58798333 | 0 | 0 | 0 |
| CEU | CSH | 58803333 | 0 | 0 | 0 |
| CEU | CSH | 58808333 | 0 | 0 | 0 |
| CEU | CSH | 58813333 | 0 | 0 | 0 |
| CEU | CSH | 58818333 | 0 | 0 | 0 |
| CEU | CSH | 58823333 | 0 | 0 | 0 |
| CEU | CSH | 58828333 | 0 | 0 | 0 |
| CEU | CSH | 58833333 | 0 | 0 | 0 |
| CEU | CSH | 58838333 | 0 | 0 | 0 |
| CEU | CSH | 58843333 | 0 | 0 | 0 |
| CEU | CSH | 58848333 | 0 | 0 | 0 |
| CEU | CSH | 58853333 | 0 | 0 | 0 |
| CEU | CSH | 58858333 | 0 | 0 | 0 |
| CEU | CSH | 58863333 | 0 | 0 | 0 |
| CEU | CSH | 58868333 | 0 | 0 | 0 |
| CEU | CSH | 58873333 | 0 | 0 | 0 |
| CEU | CSH | 58878333 | 0 | 0 | 0 |
| CEU | CSH | 58883333 | 0 | 0 | 0 |
| CEU | CSH | 58888333 | 0 | 0 | 0 |
| CEU | CSH | 58893333 | 0 | 0 | 0 |
| CEU | CSH | 58898333 | 0 | 0 | 0 |
| CEU | CSH | 58903333 | 0 | 0 | 0 |
| CEU | CSH | 58908333 | 0 | 0 | 0 |
| CEU | CSH | 58913333 | 0 | 0 | 0 |
| CEU | CSH | 58918333 | 0 | 0 | 0 |
| CEU | CSH | 58923333 | 0 | 0 | 0 |
| CEU | CSH | 58928333 | 0 | 0 | 0 |

## 2\_TajimasD\_data

|     |     |          |   |   |   |
|-----|-----|----------|---|---|---|
| CEU | CSH | 58933333 | 0 | 0 | 0 |
| CEU | CSH | 58938333 | 0 | 0 | 0 |
| CEU | CSH | 58943333 | 0 | 0 | 0 |
| CEU | CSH | 58948333 | 0 | 0 | 0 |
| CEU | CSH | 58953333 | 0 | 0 | 0 |
| CEU | CSH | 58958333 | 0 | 0 | 0 |
| CEU | CSH | 58963333 | 0 | 0 | 0 |
| CEU | CSH | 58968333 | 0 | 0 | 0 |
| CEU | CSH | 58973333 | 0 | 0 | 0 |
| CEU | CSH | 58978333 | 0 | 0 | 0 |
| CEU | CSH | 58983333 | 0 | 0 | 0 |
| CEU | CSH | 58988333 | 0 | 0 | 0 |
| CEU | CSH | 58993333 | 0 | 0 | 0 |
| CEU | CSH | 58998333 | 0 | 0 | 0 |
| CEU | CSH | 59003333 | 0 | 0 | 0 |
| CHB | CSH | 58003333 | 0 | 0 | 0 |
| CHB | CSH | 58008333 | 0 | 0 | 0 |
| CHB | CSH | 58013333 | 0 | 0 | 0 |
| CHB | CSH | 58018333 | 0 | 0 | 0 |
| CHB | CSH | 58023333 | 0 | 0 | 0 |
| CHB | CSH | 58028333 | 0 | 0 | 0 |
| CHB | CSH | 58033333 | 0 | 0 | 0 |
| CHB | CSH | 58038333 | 0 | 0 | 0 |
| CHB | CSH | 58043333 | 0 | 0 | 0 |
| CHB | CSH | 58048333 | 0 | 0 | 0 |
| CHB | CSH | 58053333 | 0 | 0 | 0 |
| CHB | CSH | 58058333 | 0 | 0 | 0 |
| CHB | CSH | 58063333 | 0 | 0 | 0 |
| CHB | CSH | 58068333 | 0 | 0 | 0 |
| CHB | CSH | 58073333 | 0 | 0 | 0 |
| CHB | CSH | 58078333 | 0 | 0 | 0 |
| CHB | CSH | 58083333 | 0 | 0 | 0 |
| CHB | CSH | 58088333 | 0 | 0 | 0 |
| CHB | CSH | 58093333 | 0 | 0 | 0 |
| CHB | CSH | 58098333 | 0 | 0 | 0 |
| CHB | CSH | 58103333 | 0 | 0 | 0 |
| CHB | CSH | 58108333 | 0 | 0 | 0 |
| CHB | CSH | 58113333 | 0 | 0 | 0 |
| CHB | CSH | 58118333 | 0 | 0 | 0 |
| CHB | CSH | 58123333 | 0 | 0 | 0 |
| CHB | CSH | 58128333 | 0 | 0 | 0 |
| CHB | CSH | 58133333 | 0 | 0 | 0 |
| CHB | CSH | 58138333 | 0 | 0 | 0 |
| CHB | CSH | 58143333 | 0 | 0 | 0 |
| CHB | CSH | 58148333 | 0 | 0 | 0 |
| CHB | CSH | 58153333 | 0 | 0 | 0 |
| CHB | CSH | 58158333 | 0 | 0 | 0 |
| CHB | CSH | 58163333 | 0 | 0 | 0 |
| CHB | CSH | 58168333 | 0 | 0 | 0 |

## 2\_TajimasD\_data

|     |     |          |   |   |   |
|-----|-----|----------|---|---|---|
| CHB | CSH | 58173333 | 0 | 0 | 0 |
| CHB | CSH | 58178333 | 0 | 0 | 0 |
| CHB | CSH | 58183333 | 0 | 0 | 0 |
| CHB | CSH | 58188333 | 0 | 0 | 0 |
| CHB | CSH | 58193333 | 0 | 0 | 0 |
| CHB | CSH | 58198333 | 0 | 0 | 0 |
| CHB | CSH | 58203333 | 0 | 0 | 0 |
| CHB | CSH | 58208333 | 0 | 0 | 0 |
| CHB | CSH | 58213333 | 0 | 0 | 0 |
| CHB | CSH | 58218333 | 0 | 0 | 0 |
| CHB | CSH | 58223333 | 0 | 0 | 0 |
| CHB | CSH | 58228333 | 0 | 0 | 0 |
| CHB | CSH | 58233333 | 0 | 0 | 0 |
| CHB | CSH | 58238333 | 0 | 0 | 0 |
| CHB | CSH | 58243333 | 0 | 0 | 0 |
| CHB | CSH | 58248333 | 0 | 0 | 0 |
| CHB | CSH | 58253333 | 0 | 0 | 0 |
| CHB | CSH | 58258333 | 0 | 0 | 0 |
| CHB | CSH | 58263333 | 0 | 0 | 0 |
| CHB | CSH | 58268333 | 0 | 0 | 0 |
| CHB | CSH | 58273333 | 0 | 0 | 0 |
| CHB | CSH | 58278333 | 0 | 0 | 0 |
| CHB | CSH | 58283333 | 0 | 0 | 0 |
| CHB | CSH | 58288333 | 0 | 0 | 0 |
| CHB | CSH | 58293333 | 0 | 0 | 0 |
| CHB | CSH | 58298333 | 0 | 0 | 0 |
| CHB | CSH | 58303333 | 0 | 0 | 0 |
| CHB | CSH | 58308333 | 0 | 0 | 0 |
| CHB | CSH | 58313333 | 0 | 0 | 0 |
| CHB | CSH | 58318333 | 0 | 0 | 0 |
| CHB | CSH | 58323333 | 0 | 0 | 0 |
| CHB | CSH | 58328333 | 0 | 0 | 0 |
| CHB | CSH | 58333333 | 0 | 0 | 0 |
| CHB | CSH | 58338333 | 0 | 0 | 0 |
| CHB | CSH | 58343333 | 0 | 0 | 0 |
| CHB | CSH | 58348333 | 0 | 0 | 0 |
| CHB | CSH | 58353333 | 0 | 0 | 0 |
| CHB | CSH | 58358333 | 0 | 0 | 0 |
| CHB | CSH | 58363333 | 0 | 0 | 0 |
| CHB | CSH | 58368333 | 0 | 0 | 0 |
| CHB | CSH | 58373333 | 0 | 0 | 0 |
| CHB | CSH | 58378333 | 0 | 0 | 0 |
| CHB | CSH | 58383333 | 0 | 0 | 0 |
| CHB | CSH | 58388333 | 0 | 0 | 0 |
| CHB | CSH | 58393333 | 0 | 0 | 0 |
| CHB | CSH | 58398333 | 0 | 0 | 0 |
| CHB | CSH | 58403333 | 0 | 0 | 0 |
| CHB | CSH | 58408333 | 0 | 0 | 0 |
| CHB | CSH | 58413333 | 0 | 0 | 0 |



## 2\_TajimasD\_data

|     |     |          |   |   |   |
|-----|-----|----------|---|---|---|
| CHB | CSH | 58418333 | 0 | 0 | 0 |
| CHB | CSH | 58423333 | 0 | 0 | 0 |
| CHB | CSH | 58428333 | 0 | 0 | 0 |
| CHB | CSH | 58433333 | 0 | 0 | 0 |
| CHB | CSH | 58438333 | 0 | 0 | 0 |
| CHB | CSH | 58443333 | 0 | 0 | 0 |
| CHB | CSH | 58448333 | 0 | 0 | 0 |
| CHB | CSH | 58453333 | 0 | 0 | 0 |
| CHB | CSH | 58458333 | 0 | 0 | 0 |
| CHB | CSH | 58463333 | 0 | 0 | 0 |
| CHB | CSH | 58468333 | 0 | 0 | 0 |
| CHB | CSH | 58473333 | 0 | 0 | 0 |
| CHB | CSH | 58478333 | 0 | 0 | 0 |
| CHB | CSH | 58483333 | 0 | 0 | 0 |
| CHB | CSH | 58488333 | 0 | 0 | 0 |
| CHB | CSH | 58493333 | 0 | 0 | 0 |
| CHB | CSH | 58498333 | 0 | 0 | 0 |
| CHB | CSH | 58503333 | 0 | 0 | 0 |
| CHB | CSH | 58508333 | 0 | 0 | 0 |
| CHB | CSH | 58513333 | 0 | 0 | 0 |
| CHB | CSH | 58518333 | 0 | 0 | 0 |
| CHB | CSH | 58523333 | 0 | 0 | 0 |
| CHB | CSH | 58528333 | 0 | 0 | 0 |
| CHB | CSH | 58533333 | 0 | 0 | 0 |
| CHB | CSH | 58538333 | 0 | 0 | 0 |
| CHB | CSH | 58543333 | 0 | 0 | 0 |
| CHB | CSH | 58548333 | 0 | 0 | 0 |
| CHB | CSH | 58553333 | 0 | 0 | 0 |
| CHB | CSH | 58558333 | 0 | 0 | 0 |
| CHB | CSH | 58563333 | 0 | 0 | 0 |
| CHB | CSH | 58568333 | 0 | 0 | 0 |
| CHB | CSH | 58573333 | 0 | 0 | 0 |
| CHB | CSH | 58578333 | 0 | 0 | 0 |
| CHB | CSH | 58583333 | 0 | 0 | 0 |
| CHB | CSH | 58588333 | 0 | 0 | 0 |
| CHB | CSH | 58593333 | 0 | 0 | 0 |
| CHB | CSH | 58598333 | 0 | 0 | 0 |
| CHB | CSH | 58603333 | 0 | 0 | 0 |
| CHB | CSH | 58608333 | 0 | 0 | 0 |
| CHB | CSH | 58613333 | 0 | 0 | 0 |
| CHB | CSH | 58618333 | 0 | 0 | 0 |
| CHB | CSH | 58623333 | 0 | 0 | 0 |
| CHB | CSH | 58628333 | 0 | 0 | 0 |
| CHB | CSH | 58633333 | 0 | 0 | 0 |
| CHB | CSH | 58638333 | 0 | 0 | 0 |
| CHB | CSH | 58643333 | 0 | 0 | 0 |
| CHB | CSH | 58648333 | 0 | 0 | 0 |
| CHB | CSH | 58653333 | 0 | 0 | 0 |
| CHB | CSH | 58658333 | 0 | 0 | 0 |

## 2\_TajimasD\_data

|     |     |          |   |   |   |
|-----|-----|----------|---|---|---|
| CHB | CSH | 58663333 | 0 | 0 | 0 |
| CHB | CSH | 58668333 | 0 | 0 | 0 |
| CHB | CSH | 58673333 | 0 | 0 | 0 |
| CHB | CSH | 58678333 | 0 | 0 | 0 |
| CHB | CSH | 58683333 | 0 | 0 | 0 |
| CHB | CSH | 58688333 | 0 | 0 | 0 |
| CHB | CSH | 58693333 | 0 | 0 | 0 |
| CHB | CSH | 58698333 | 0 | 0 | 0 |
| CHB | CSH | 58703333 | 0 | 0 | 0 |
| CHB | CSH | 58708333 | 0 | 0 | 0 |
| CHB | CSH | 58713333 | 0 | 0 | 0 |
| CHB | CSH | 58718333 | 0 | 0 | 0 |
| CHB | CSH | 58723333 | 0 | 0 | 0 |
| CHB | CSH | 58728333 | 0 | 0 | 0 |
| CHB | CSH | 58733333 | 0 | 0 | 0 |
| CHB | CSH | 58738333 | 0 | 0 | 0 |
| CHB | CSH | 58743333 | 0 | 0 | 0 |
| CHB | CSH | 58748333 | 0 | 0 | 0 |
| CHB | CSH | 58753333 | 0 | 0 | 0 |
| CHB | CSH | 58758333 | 0 | 0 | 0 |
| CHB | CSH | 58763333 | 0 | 0 | 0 |
| CHB | CSH | 58768333 | 0 | 0 | 0 |
| CHB | CSH | 58773333 | 0 | 0 | 0 |
| CHB | CSH | 58778333 | 0 | 0 | 0 |
| CHB | CSH | 58783333 | 0 | 0 | 0 |
| CHB | CSH | 58788333 | 0 | 0 | 0 |
| CHB | CSH | 58793333 | 0 | 0 | 0 |
| CHB | CSH | 58798333 | 0 | 0 | 0 |
| CHB | CSH | 58803333 | 0 | 0 | 0 |
| CHB | CSH | 58808333 | 0 | 0 | 0 |
| CHB | CSH | 58813333 | 0 | 0 | 0 |
| CHB | CSH | 58818333 | 0 | 0 | 0 |
| CHB | CSH | 58823333 | 0 | 0 | 0 |
| CHB | CSH | 58828333 | 0 | 0 | 0 |
| CHB | CSH | 58833333 | 0 | 0 | 0 |
| CHB | CSH | 58838333 | 0 | 0 | 0 |
| CHB | CSH | 58843333 | 0 | 0 | 0 |
| CHB | CSH | 58848333 | 0 | 0 | 0 |
| CHB | CSH | 58853333 | 0 | 0 | 0 |
| CHB | CSH | 58858333 | 0 | 0 | 0 |
| CHB | CSH | 58863333 | 0 | 0 | 0 |
| CHB | CSH | 58868333 | 0 | 0 | 0 |
| CHB | CSH | 58873333 | 0 | 0 | 0 |
| CHB | CSH | 58878333 | 0 | 0 | 0 |
| CHB | CSH | 58883333 | 0 | 0 | 0 |
| CHB | CSH | 58888333 | 0 | 0 | 0 |
| CHB | CSH | 58893333 | 0 | 0 | 0 |
| CHB | CSH | 58898333 | 0 | 0 | 0 |
| CHB | CSH | 58903333 | 0 | 0 | 0 |

## 2\_TajimasD\_data

|     |     |          |   |   |   |
|-----|-----|----------|---|---|---|
| CHB | CSH | 58908333 | 0 | 0 | 0 |
| CHB | CSH | 58913333 | 0 | 0 | 0 |
| CHB | CSH | 58918333 | 0 | 0 | 0 |
| CHB | CSH | 58923333 | 0 | 0 | 0 |
| CHB | CSH | 58928333 | 0 | 0 | 0 |
| CHB | CSH | 58933333 | 0 | 0 | 0 |
| CHB | CSH | 58938333 | 0 | 0 | 0 |
| CHB | CSH | 58943333 | 0 | 0 | 0 |
| CHB | CSH | 58948333 | 0 | 0 | 0 |
| CHB | CSH | 58953333 | 0 | 0 | 0 |
| CHB | CSH | 58958333 | 0 | 0 | 0 |
| CHB | CSH | 58963333 | 0 | 0 | 0 |
| CHB | CSH | 58968333 | 0 | 0 | 0 |
| CHB | CSH | 58973333 | 0 | 0 | 0 |
| CHB | CSH | 58978333 | 0 | 0 | 0 |
| CHB | CSH | 58983333 | 0 | 0 | 0 |
| CHB | CSH | 58988333 | 0 | 0 | 0 |
| CHB | CSH | 58993333 | 0 | 0 | 0 |
| CHB | CSH | 58998333 | 0 | 0 | 0 |
| CHB | CSH | 59003333 | 0 | 0 | 0 |
| YRI | CSH | 58003333 | 0 | 0 | 0 |
| YRI | CSH | 58008333 | 0 | 0 | 0 |
| YRI | CSH | 58013333 | 0 | 0 | 0 |
| YRI | CSH | 58018333 | 0 | 0 | 0 |
| YRI | CSH | 58023333 | 0 | 0 | 0 |
| YRI | CSH | 58028333 | 0 | 0 | 0 |
| YRI | CSH | 58033333 | 0 | 0 | 0 |
| YRI | CSH | 58038333 | 0 | 0 | 0 |
| YRI | CSH | 58043333 | 0 | 0 | 0 |
| YRI | CSH | 58048333 | 0 | 0 | 0 |
| YRI | CSH | 58053333 | 0 | 0 | 0 |
| YRI | CSH | 58058333 | 0 | 0 | 0 |
| YRI | CSH | 58063333 | 0 | 0 | 0 |
| YRI | CSH | 58068333 | 0 | 0 | 0 |
| YRI | CSH | 58073333 | 0 | 0 | 0 |
| YRI | CSH | 58078333 | 0 | 0 | 0 |
| YRI | CSH | 58083333 | 0 | 0 | 0 |
| YRI | CSH | 58088333 | 0 | 0 | 0 |
| YRI | CSH | 58093333 | 0 | 0 | 0 |
| YRI | CSH | 58098333 | 0 | 0 | 0 |
| YRI | CSH | 58103333 | 0 | 0 | 0 |
| YRI | CSH | 58108333 | 0 | 0 | 0 |
| YRI | CSH | 58113333 | 0 | 0 | 0 |
| YRI | CSH | 58118333 | 0 | 0 | 0 |
| YRI | CSH | 58123333 | 0 | 0 | 0 |
| YRI | CSH | 58128333 | 0 | 0 | 0 |
| YRI | CSH | 58133333 | 0 | 0 | 0 |
| YRI | CSH | 58138333 | 0 | 0 | 0 |
| YRI | CSH | 58143333 | 0 | 0 | 0 |

## 2\_TajimasD\_data

|     |     |          |   |   |   |
|-----|-----|----------|---|---|---|
| YRI | CSH | 58148333 | 0 | 0 | 0 |
| YRI | CSH | 58153333 | 0 | 0 | 0 |
| YRI | CSH | 58158333 | 0 | 0 | 0 |
| YRI | CSH | 58163333 | 0 | 0 | 0 |
| YRI | CSH | 58168333 | 0 | 0 | 0 |
| YRI | CSH | 58173333 | 0 | 0 | 0 |
| YRI | CSH | 58178333 | 0 | 0 | 0 |
| YRI | CSH | 58183333 | 0 | 0 | 0 |
| YRI | CSH | 58188333 | 0 | 0 | 0 |
| YRI | CSH | 58193333 | 0 | 0 | 0 |
| YRI | CSH | 58198333 | 0 | 0 | 0 |
| YRI | CSH | 58203333 | 0 | 0 | 0 |
| YRI | CSH | 58208333 | 0 | 0 | 0 |
| YRI | CSH | 58213333 | 0 | 0 | 0 |
| YRI | CSH | 58218333 | 0 | 0 | 0 |
| YRI | CSH | 58223333 | 0 | 0 | 0 |
| YRI | CSH | 58228333 | 0 | 0 | 0 |
| YRI | CSH | 58233333 | 0 | 0 | 0 |
| YRI | CSH | 58238333 | 0 | 0 | 0 |
| YRI | CSH | 58243333 | 0 | 0 | 0 |
| YRI | CSH | 58248333 | 0 | 0 | 0 |
| YRI | CSH | 58253333 | 0 | 0 | 0 |
| YRI | CSH | 58258333 | 0 | 0 | 0 |
| YRI | CSH | 58263333 | 0 | 0 | 0 |
| YRI | CSH | 58268333 | 0 | 0 | 0 |
| YRI | CSH | 58273333 | 0 | 0 | 0 |
| YRI | CSH | 58278333 | 0 | 0 | 0 |
| YRI | CSH | 58283333 | 0 | 0 | 0 |
| YRI | CSH | 58288333 | 0 | 0 | 0 |
| YRI | CSH | 58293333 | 0 | 0 | 0 |
| YRI | CSH | 58298333 | 0 | 0 | 0 |
| YRI | CSH | 58303333 | 0 | 0 | 0 |
| YRI | CSH | 58308333 | 0 | 0 | 0 |
| YRI | CSH | 58313333 | 0 | 0 | 0 |
| YRI | CSH | 58318333 | 0 | 0 | 0 |
| YRI | CSH | 58323333 | 0 | 0 | 0 |
| YRI | CSH | 58328333 | 0 | 0 | 0 |
| YRI | CSH | 58333333 | 0 | 0 | 0 |
| YRI | CSH | 58338333 | 0 | 0 | 0 |
| YRI | CSH | 58343333 | 0 | 0 | 0 |
| YRI | CSH | 58348333 | 0 | 0 | 0 |
| YRI | CSH | 58353333 | 0 | 0 | 0 |
| YRI | CSH | 58358333 | 0 | 0 | 0 |
| YRI | CSH | 58363333 | 0 | 0 | 0 |
| YRI | CSH | 58368333 | 0 | 0 | 0 |
| YRI | CSH | 58373333 | 0 | 0 | 0 |
| YRI | CSH | 58378333 | 0 | 0 | 0 |
| YRI | CSH | 58383333 | 0 | 0 | 0 |
| YRI | CSH | 58388333 | 0 | 0 | 0 |

## 2\_TajimasD\_data

|     |     |          |   |   |   |
|-----|-----|----------|---|---|---|
| YRI | CSH | 58393333 | 0 | 0 | 0 |
| YRI | CSH | 58398333 | 0 | 0 | 0 |
| YRI | CSH | 58403333 | 0 | 0 | 0 |
| YRI | CSH | 58408333 | 0 | 0 | 0 |
| YRI | CSH | 58413333 | 0 | 0 | 0 |
| YRI | CSH | 58418333 | 0 | 0 | 0 |
| YRI | CSH | 58423333 | 0 | 0 | 0 |
| YRI | CSH | 58428333 | 0 | 0 | 0 |
| YRI | CSH | 58433333 | 0 | 0 | 0 |
| YRI | CSH | 58438333 | 0 | 0 | 0 |
| YRI | CSH | 58443333 | 0 | 0 | 0 |
| YRI | CSH | 58448333 | 0 | 0 | 0 |
| YRI | CSH | 58453333 | 0 | 0 | 0 |
| YRI | CSH | 58458333 | 0 | 0 | 0 |
| YRI | CSH | 58463333 | 0 | 0 | 0 |
| YRI | CSH | 58468333 | 0 | 0 | 0 |
| YRI | CSH | 58473333 | 0 | 0 | 0 |
| YRI | CSH | 58478333 | 0 | 0 | 0 |
| YRI | CSH | 58483333 | 0 | 0 | 0 |
| YRI | CSH | 58488333 | 0 | 0 | 0 |
| YRI | CSH | 58493333 | 0 | 0 | 0 |
| YRI | CSH | 58498333 | 0 | 0 | 0 |
| YRI | CSH | 58503333 | 0 | 0 | 0 |
| YRI | CSH | 58508333 | 0 | 0 | 0 |
| YRI | CSH | 58513333 | 0 | 0 | 0 |
| YRI | CSH | 58518333 | 0 | 0 | 0 |
| YRI | CSH | 58523333 | 0 | 0 | 0 |
| YRI | CSH | 58528333 | 0 | 0 | 0 |
| YRI | CSH | 58533333 | 0 | 0 | 0 |
| YRI | CSH | 58538333 | 0 | 0 | 0 |
| YRI | CSH | 58543333 | 0 | 0 | 0 |
| YRI | CSH | 58548333 | 0 | 0 | 0 |
| YRI | CSH | 58553333 | 0 | 0 | 0 |
| YRI | CSH | 58558333 | 0 | 0 | 0 |
| YRI | CSH | 58563333 | 0 | 0 | 0 |
| YRI | CSH | 58568333 | 0 | 0 | 0 |
| YRI | CSH | 58573333 | 0 | 0 | 0 |
| YRI | CSH | 58578333 | 0 | 0 | 0 |
| YRI | CSH | 58583333 | 0 | 0 | 0 |
| YRI | CSH | 58588333 | 0 | 0 | 0 |
| YRI | CSH | 58593333 | 0 | 0 | 0 |
| YRI | CSH | 58598333 | 0 | 0 | 0 |
| YRI | CSH | 58603333 | 0 | 0 | 0 |
| YRI | CSH | 58608333 | 0 | 0 | 0 |
| YRI | CSH | 58613333 | 0 | 0 | 0 |
| YRI | CSH | 58618333 | 0 | 0 | 0 |
| YRI | CSH | 58623333 | 0 | 0 | 0 |
| YRI | CSH | 58628333 | 0 | 0 | 0 |
| YRI | CSH | 58633333 | 0 | 0 | 0 |

## 2\_TajimasD\_data

|     |     |          |   |   |   |
|-----|-----|----------|---|---|---|
| YRI | CSH | 58638333 | 0 | 0 | 0 |
| YRI | CSH | 58643333 | 0 | 0 | 0 |
| YRI | CSH | 58648333 | 0 | 0 | 0 |
| YRI | CSH | 58653333 | 0 | 0 | 0 |
| YRI | CSH | 58658333 | 0 | 0 | 0 |
| YRI | CSH | 58663333 | 0 | 0 | 0 |
| YRI | CSH | 58668333 | 0 | 0 | 0 |
| YRI | CSH | 58673333 | 0 | 0 | 0 |
| YRI | CSH | 58678333 | 0 | 0 | 0 |
| YRI | CSH | 58683333 | 0 | 0 | 0 |
| YRI | CSH | 58688333 | 0 | 0 | 0 |
| YRI | CSH | 58693333 | 0 | 0 | 0 |
| YRI | CSH | 58698333 | 0 | 0 | 0 |
| YRI | CSH | 58703333 | 0 | 0 | 0 |
| YRI | CSH | 58708333 | 0 | 0 | 0 |
| YRI | CSH | 58713333 | 0 | 0 | 0 |
| YRI | CSH | 58718333 | 0 | 0 | 0 |
| YRI | CSH | 58723333 | 0 | 0 | 0 |
| YRI | CSH | 58728333 | 0 | 0 | 0 |
| YRI | CSH | 58733333 | 0 | 0 | 0 |
| YRI | CSH | 58738333 | 0 | 0 | 0 |
| YRI | CSH | 58743333 | 0 | 0 | 0 |
| YRI | CSH | 58748333 | 0 | 0 | 0 |
| YRI | CSH | 58753333 | 0 | 0 | 0 |
| YRI | CSH | 58758333 | 0 | 0 | 0 |
| YRI | CSH | 58763333 | 0 | 0 | 0 |
| YRI | CSH | 58768333 | 0 | 0 | 0 |
| YRI | CSH | 58773333 | 0 | 0 | 0 |
| YRI | CSH | 58778333 | 0 | 0 | 0 |
| YRI | CSH | 58783333 | 0 | 0 | 0 |
| YRI | CSH | 58788333 | 0 | 0 | 0 |
| YRI | CSH | 58793333 | 0 | 0 | 0 |
| YRI | CSH | 58798333 | 0 | 0 | 0 |
| YRI | CSH | 58803333 | 0 | 0 | 0 |
| YRI | CSH | 58808333 | 0 | 0 | 0 |
| YRI | CSH | 58813333 | 0 | 0 | 0 |
| YRI | CSH | 58818333 | 0 | 0 | 0 |
| YRI | CSH | 58823333 | 0 | 0 | 0 |
| YRI | CSH | 58828333 | 0 | 0 | 0 |
| YRI | CSH | 58833333 | 0 | 0 | 0 |
| YRI | CSH | 58838333 | 0 | 0 | 0 |
| YRI | CSH | 58843333 | 0 | 0 | 0 |
| YRI | CSH | 58848333 | 0 | 0 | 0 |
| YRI | CSH | 58853333 | 0 | 0 | 0 |
| YRI | CSH | 58858333 | 0 | 0 | 0 |
| YRI | CSH | 58863333 | 0 | 0 | 0 |
| YRI | CSH | 58868333 | 0 | 0 | 0 |
| YRI | CSH | 58873333 | 0 | 0 | 0 |
| YRI | CSH | 58878333 | 0 | 0 | 0 |

## 2\_TajimasD\_data

|     |       |          |         |         |         |
|-----|-------|----------|---------|---------|---------|
| YRI | CSH   | 58883333 | 0       | 0       | 0       |
| YRI | CSH   | 58888333 | 0       | 0       | 0       |
| YRI | CSH   | 58893333 | 0       | 0       | 0       |
| YRI | CSH   | 58898333 | 0       | 0       | 0       |
| YRI | CSH   | 58903333 | 0       | 0       | 0       |
| YRI | CSH   | 58908333 | 0       | 0       | 0       |
| YRI | CSH   | 58913333 | 0       | 0       | 0       |
| YRI | CSH   | 58918333 | 0       | 0       | 0       |
| YRI | CSH   | 58923333 | 0       | 0       | 0       |
| YRI | CSH   | 58928333 | 0       | 0       | 0       |
| YRI | CSH   | 58933333 | 0       | 0       | 0       |
| YRI | CSH   | 58938333 | 0       | 0       | 0       |
| YRI | CSH   | 58943333 | 0       | 0       | 0       |
| YRI | CSH   | 58948333 | 0       | 0       | 0       |
| YRI | CSH   | 58953333 | 0       | 0       | 0       |
| YRI | CSH   | 58958333 | 0       | 0       | 0       |
| YRI | CSH   | 58963333 | 0       | 0       | 0       |
| YRI | CSH   | 58968333 | 0       | 0       | 0       |
| YRI | CSH   | 58973333 | 0       | 0       | 0       |
| YRI | CSH   | 58978333 | 0       | 0       | 0       |
| YRI | CSH   | 58983333 | 0       | 0       | 0       |
| YRI | CSH   | 58988333 | 0       | 0       | 0       |
| YRI | CSH   | 58993333 | 0       | 0       | 0       |
| YRI | CSH   | 58998333 | 0       | 0       | 0       |
| YRI | CSH   | 59003333 | 0       | 0       | 0       |
| CEU | DEFA1 | 6482649  | 13.4754 | 15.5212 | -0.4067 |
| CEU | DEFA1 | 6487649  | 16.6397 | 14.1567 | 0.5388  |
| CEU | DEFA1 | 6492649  | 18.7572 | 15.1801 | 0.7264  |
| CEU | DEFA1 | 6497649  | 11.8169 | 11.9394 | -0.0312 |
| CEU | DEFA1 | 6502649  | 9.5963  | 11.4277 | -0.4866 |
| CEU | DEFA1 | 6507649  | 13.8632 | 15.5212 | -0.3296 |
| CEU | DEFA1 | 6512649  | 20.8192 | 17.2268 | 0.6464  |
| CEU | DEFA1 | 6517649  | 21.0388 | 17.3974 | 0.6491  |
| CEU | DEFA1 | 6522649  | 13.8895 | 15.8623 | -0.3842 |
| CEU | DEFA1 | 6527649  | 13.1338 | 13.9861 | -0.1871 |
| CEU | DEFA1 | 6532649  | 15.3651 | 14.3272 | 0.2227  |
| CEU | DEFA1 | 6537649  | 11.6726 | 15.8623 | -0.8158 |
| CEU | DEFA1 | 6542649  | 6.8151  | 15.1801 | -1.6986 |
| CEU | DEFA1 | 6547649  | 7.3579  | 15.5212 | -1.6229 |
| CEU | DEFA1 | 6552649  | 14.2181 | 16.7151 | -0.4625 |
| CEU | DEFA1 | 6557649  | 18.6533 | 15.5212 | 0.6227  |
| CEU | DEFA1 | 6562649  | 15.3933 | 15.5212 | -0.0254 |
| CEU | DEFA1 | 6567649  | 14.5817 | 15.3506 | -0.1545 |
| CEU | DEFA1 | 6572649  | 13.7877 | 12.4511 | 0.3276  |
| CEU | DEFA1 | 6577649  | 12.7972 | 10.916  | 0.5218  |
| CEU | DEFA1 | 6582649  | 13.5846 | 10.2337 | 0.9872  |
| CEU | DEFA1 | 6587649  | 11.9555 | 10.4043 | 0.45    |
| CEU | DEFA1 | 6592649  | 10.255  | 10.5749 | -0.0914 |
| CEU | DEFA1 | 6597649  | 7.659   | 8.0164  | -0.132  |

## 2\_TajimasD\_data

|     |       |         |         |         |         |
|-----|-------|---------|---------|---------|---------|
| CEU | DEFA1 | 6602649 | 8.0322  | 8.187   | -0.0561 |
| CEU | DEFA1 | 6607649 | 9.3927  | 8.6987  | 0.2378  |
| CEU | DEFA1 | 6612649 | 6.5797  | 6.1402  | 0.2068  |
| CEU | DEFA1 | 6617649 | 5.867   | 7.1636  | -0.5308 |
| CEU | DEFA1 | 6622649 | 7.5217  | 9.7221  | -0.68   |
| CEU | DEFA1 | 6627649 | 17.6922 | 15.0095 | 0.5507  |
| CEU | DEFA1 | 6632649 | 25.5523 | 21.3203 | 0.6203  |
| CEU | DEFA1 | 6637649 | 20.3496 | 18.9324 | 0.2329  |
| CEU | DEFA1 | 6642649 | 21.3558 | 15.8623 | 1.0697  |
| CEU | DEFA1 | 6647649 | 23.8586 | 15.5212 | 1.6575  |
| CEU | DEFA1 | 6652649 | 16.9021 | 12.1099 | 1.2056  |
| CEU | DEFA1 | 6657649 | 12.6543 | 11.0866 | 0.4285  |
| CEU | DEFA1 | 6662649 | 13.7481 | 14.3272 | -0.1242 |
| CEU | DEFA1 | 6667649 | 9.3795  | 13.3039 | -0.9033 |
| CEU | DEFA1 | 6672649 | 8.733   | 11.5982 | -0.7507 |
| CEU | DEFA1 | 6677649 | 11.7351 | 11.7688 | -0.0087 |
| CEU | DEFA1 | 6682649 | 11.3777 | 10.7454 | 0.178   |
| CEU | DEFA1 | 6687649 | 12.0509 | 11.5982 | 0.1186  |
| CEU | DEFA1 | 6692649 | 17.0456 | 14.1567 | 0.6269  |
| CEU | DEFA1 | 6697649 | 19.4739 | 15.5212 | 0.7858  |
| CEU | DEFA1 | 6702649 | 16.7415 | 14.6684 | 0.4349  |
| CEU | DEFA1 | 6707649 | 18.888  | 14.8389 | 0.8402  |
| CEU | DEFA1 | 6712649 | 34.5561 | 24.3904 | 1.3082  |
| CEU | DEFA1 | 6717649 | 41.0641 | 27.4606 | 1.5601  |
| CEU | DEFA1 | 6722649 | 37.2237 | 22.5142 | 2.0454  |
| CEU | DEFA1 | 6727649 | 40.6333 | 26.7783 | 1.6283  |
| CEU | DEFA1 | 6732649 | 39.8578 | 26.9489 | 1.5078  |
| CEU | DEFA1 | 6737649 | 38.0344 | 23.5376 | 1.931   |
| CEU | DEFA1 | 6742649 | 25.0103 | 22.0026 | 0.4276  |
| CEU | DEFA1 | 6747649 | 15.3368 | 20.2969 | -0.7624 |
| CEU | DEFA1 | 6752649 | 18.9493 | 19.2736 | -0.0524 |
| CEU | DEFA1 | 6757649 | 25.1563 | 22.1731 | 0.421   |
| CEU | DEFA1 | 6762649 | 45.3649 | 28.9956 | 1.7805  |
| CEU | DEFA1 | 6767649 | 33.8788 | 21.1497 | 1.8803  |
| CEU | DEFA1 | 6772649 | 7.8559  | 11.0866 | -0.8831 |
| CEU | DEFA1 | 6777649 | 12.9202 | 14.4978 | -0.3347 |
| CEU | DEFA1 | 6782649 | 16.5707 | 15.0095 | 0.3205  |
| CEU | DEFA1 | 6787649 | 22.1341 | 17.0562 | 0.9225  |
| CEU | DEFA1 | 6792649 | 22.2635 | 17.7385 | 0.7917  |
| CEU | DEFA1 | 6797649 | 17.1449 | 14.3272 | 0.6045  |
| CEU | DEFA1 | 6802649 | 14.3342 | 12.1099 | 0.5596  |
| CEU | DEFA1 | 6807649 | 14.1826 | 12.9627 | 0.2878  |
| CEU | DEFA1 | 6812649 | 13.8844 | 12.6216 | 0.3055  |
| CEU | DEFA1 | 6817649 | 12.6889 | 11.2571 | 0.3858  |
| CEU | DEFA1 | 6822649 | 20.6764 | 15.6917 | 0.9807  |
| CEU | DEFA1 | 6827649 | 20.5277 | 14.8389 | 1.1805  |
| CEU | DEFA1 | 6832649 | 8.9546  | 6.6519  | 1.0082  |
| CEU | DEFA1 | 6837649 | 4.6733  | 3.4112  | 0.9913  |
| CEU | DEFA1 | 6842649 | 5.3805  | 3.5818  | 1.3557  |



## 2\_TajimasD\_data

|     |       |         |         |         |         |
|-----|-------|---------|---------|---------|---------|
| CEU | DEFA1 | 6847649 | 2.5501  | 1.7056  | 1.1566  |
| CEU | DEFA1 | 6852649 | 1.5194  | 1.3645  | 0.2506  |
| CEU | DEFA1 | 6857649 | 4.4947  | 2.729   | 1.669   |
| CEU | DEFA1 | 6862649 | 4.5306  | 2.5584  | 1.9646  |
| CEU | DEFA1 | 6867649 | 1.5504  | 0.8528  | 1.571   |
| CEU | DEFA1 | 6872649 | 9.2688  | 7.8459  | 0.536   |
| CEU | DEFA1 | 6877649 | 16.0395 | 16.0329 | 0.0013  |
| CEU | DEFA1 | 6882649 | 11.8923 | 13.3039 | -0.3249 |
| CEU | DEFA1 | 6887649 | 12.3603 | 11.7688 | 0.1529  |
| CEU | DEFA1 | 6892649 | 23.8623 | 17.3974 | 1.1524  |
| CEU | DEFA1 | 6897649 | 38.8999 | 24.0493 | 1.9373  |
| CEU | DEFA1 | 6902649 | 40.1443 | 24.3904 | 2.0273  |
| CEU | DEFA1 | 6907649 | 28.9238 | 19.2736 | 1.559   |
| CEU | DEFA1 | 6912649 | 17.3838 | 13.9861 | 0.7459  |
| CEU | DEFA1 | 6917649 | 9.2161  | 11.0866 | -0.5113 |
| CEU | DEFA1 | 6922649 | 9.407   | 13.4744 | -0.925  |
| CEU | DEFA1 | 6927649 | 13.3486 | 16.2034 | -0.5447 |
| CEU | DEFA1 | 6932649 | 13.7993 | 17.5679 | -0.6655 |
| CEU | DEFA1 | 6937649 | 15.3585 | 25.0727 | -1.217  |
| CEU | DEFA1 | 6942649 | 22.8008 | 27.1194 | -0.5013 |
| CEU | DEFA1 | 6947649 | 32.0404 | 27.29   | 0.5481  |
| CEU | DEFA1 | 6952649 | 30.7001 | 28.4839 | 0.2453  |
| CEU | DEFA1 | 6957649 | 27.9021 | 25.4138 | 0.3077  |
| CEU | DEFA1 | 6962649 | 26.3469 | 22.3437 | 0.5608  |
| CEU | DEFA1 | 6967649 | 17.4552 | 18.7619 | -0.2166 |
| CEU | DEFA1 | 6972649 | 15.7877 | 17.7385 | -0.3413 |
| CEU | DEFA1 | 6977649 | 23.007  | 19.4441 | 0.5707  |
| CEU | DEFA1 | 6982649 | 31.2177 | 28.9956 | 0.2417  |
| CEU | DEFA1 | 6987649 | 31.9101 | 29.3367 | 0.2767  |
| CEU | DEFA1 | 6992649 | 27.0808 | 21.3203 | 0.8444  |
| CEU | DEFA1 | 6997649 | 28.6197 | 26.0961 | 0.3041  |
| CEU | DEFA1 | 7002649 | 31.1882 | 29.8484 | 0.1417  |
| CEU | DEFA1 | 7007649 | 32.7392 | 26.4372 | 0.7499  |
| CEU | DEFA1 | 7012649 | 19.7168 | 16.7151 | 0.556   |
| CEU | DEFA1 | 7017649 | 4.3882  | 7.3342  | -1.1804 |
| CEU | DEFA1 | 7022649 | 9.1808  | 7.8459  | 0.5029  |
| CEU | DEFA1 | 7027649 | 11.679  | 9.0398  | 0.8726  |
| CEU | DEFA1 | 7032649 | 5.1872  | 9.8926  | -1.4308 |
| CEU | DEFA1 | 7037649 | 1.8852  | 8.0164  | -2.2646 |
| CEU | DEFA1 | 7042649 | 4.3597  | 6.8225  | -1.0538 |
| CEU | DEFA1 | 7047649 | 6.3671  | 7.1636  | -0.326  |
| CEU | DEFA1 | 7052649 | 8.1016  | 7.8459  | 0.0963  |
| CEU | DEFA1 | 7057649 | 14.1429 | 11.0866 | 0.8354  |
| CEU | DEFA1 | 7062649 | 15.4989 | 11.0866 | 1.2061  |
| CEU | DEFA1 | 7067649 | 6.7124  | 5.9697  | 0.3584  |
| CEU | DEFA1 | 7072649 | 1.5026  | 1.7056  | -0.278  |
| CEU | DEFA1 | 7077649 | 3.9981  | 3.2407  | 0.6211  |
| CEU | DEFA1 | 7082649 | 7.0882  | 5.2874  | 0.9683  |
| CEU | DEFA1 | 7087649 | 4.6285  | 3.0701  | 1.3368  |

## 2\_TajimasD\_data

|     |       |         |        |         |         |
|-----|-------|---------|--------|---------|---------|
| CEU | DEFA1 | 7092649 | 0.6883 | 0.8528  | -0.3704 |
| CEU | DEFA1 | 7097649 | 0.2041 | 0.5117  | -0.9647 |
| CEU | DEFA1 | 7102649 | 0.1552 | 0.5117  | -1.1181 |
| CEU | DEFA1 | 7107649 | 1.8433 | 2.3879  | -0.5735 |
| CEU | DEFA1 | 7112649 | 1.6881 | 1.8762  | -0.2395 |
| CEU | DEFA1 | 7117649 | 0      | 0       | 0       |
| CEU | DEFA1 | 7122649 | 0      | 0       | 0       |
| CEU | DEFA1 | 7127649 | 2.6009 | 1.5351  | 1.5804  |
| CEU | DEFA1 | 7132649 | 2.6009 | 1.5351  | 1.5804  |
| CEU | DEFA1 | 7137649 | 0      | 0       | 0       |
| CEU | DEFA1 | 7142649 | 0.0392 | 0.1706  | -0.7805 |
| CEU | DEFA1 | 7147649 | 0.8489 | 1.0234  | -0.3467 |
| CEU | DEFA1 | 7152649 | 7.5154 | 15.8623 | -1.6253 |
| CEU | DEFA1 | 7157649 | 7.5485 | 16.2034 | -1.6514 |
| CEU | DEFA1 | 7162649 | 1.6213 | 2.729   | -1.047  |
| CEU | DEFA1 | 7167649 | 1.2896 | 3.2407  | -1.5999 |
| CEU | DEFA1 | 7172649 | 1.4704 | 4.7757  | -1.944  |
| CEU | DEFA1 | 7177649 | 1.6726 | 4.9463  | -1.867  |
| CEU | DEFA1 | 7182649 | 1.5209 | 4.2641  | -1.7807 |
| CEU | DEFA1 | 7187649 | 1.8396 | 7.1636  | -2.1794 |
| CEU | DEFA1 | 7192649 | 2.4026 | 8.3576  | -2.1168 |
| CEU | DEFA1 | 7197649 | 2.852  | 9.0398  | -2.0458 |
| CEU | DEFA1 | 7202649 | 2.3298 | 8.8692  | -2.2005 |
| CEU | DEFA1 | 7207649 | 3.0793 | 7.5047  | -1.7363 |
| CEU | DEFA1 | 7212649 | 4.8647 | 10.2337 | -1.5817 |
| CEU | DEFA1 | 7217649 | 4.9542 | 11.7688 | -1.7611 |
| CEU | DEFA1 | 7222649 | 4.6042 | 11.9394 | -1.8702 |
| CEU | DEFA1 | 7227649 | 4.4267 | 9.0398  | -1.5252 |
| CEU | DEFA1 | 7232649 | 3.5844 | 5.7991  | -1.0969 |
| CEU | DEFA1 | 7237649 | 2.7594 | 6.4814  | -1.6683 |
| CEU | DEFA1 | 7242649 | 3.5024 | 7.5047  | -1.5703 |
| CEU | DEFA1 | 7247649 | 2.9149 | 6.8225  | -1.6721 |
| CEU | DEFA1 | 7252649 | 3.5065 | 6.3108  | -1.2875 |
| CEU | DEFA1 | 7257649 | 5.4313 | 5.9697  | -0.2598 |
| CEU | DEFA1 | 7262649 | 5.1408 | 5.2874  | -0.0788 |
| CEU | DEFA1 | 7267649 | 3.477  | 4.6052  | -0.685  |
| CEU | DEFA1 | 7272649 | 3.4607 | 6.4814  | -1.3539 |
| CEU | DEFA1 | 7277649 | 2.9971 | 6.8225  | -1.6369 |
| CEU | DEFA1 | 7282649 | 1.0738 | 2.8996  | -1.642  |
| CEU | DEFA1 | 7287649 | 2.0107 | 2.3879  | -0.3972 |
| CEU | DEFA1 | 7292649 | 3.1911 | 2.729   | 0.4368  |
| CEU | DEFA1 | 7297649 | 1.9944 | 1.8762  | 0.1505  |
| CEU | DEFA1 | 7302649 | 0.3774 | 1.3645  | -1.5969 |
| CEU | DEFA1 | 7307649 | 0.9652 | 1.7056  | -1.0141 |
| CEU | DEFA1 | 7312649 | 1.2847 | 2.3879  | -1.1618 |
| CEU | DEFA1 | 7317649 | 0.4389 | 1.5351  | -1.6254 |
| CEU | DEFA1 | 7322649 | 0.529  | 0.5117  | 0.0543  |
| CEU | DEFA1 | 7327649 | 2.7547 | 2.729   | 0.0243  |
| CEU | DEFA1 | 7332649 | 2.3941 | 3.7524  | -0.9841 |

## 2\_TajimasD\_data

|     |       |         |         |         |         |
|-----|-------|---------|---------|---------|---------|
| CEU | DEFA1 | 7337649 | 1.3208  | 3.5818  | -1.7041 |
| CEU | DEFA1 | 7342649 | 1.6871  | 2.5584  | -0.868  |
| CEU | DEFA1 | 7347649 | 0.6378  | 0.5117  | 0.3955  |
| CEU | DEFA1 | 7352649 | 0.9992  | 2.2173  | -1.3608 |
| CEU | DEFA1 | 7357649 | 0.926   | 2.2173  | -1.4426 |
| CEU | DEFA1 | 7362649 | 1.5067  | 1.1939  | 0.5574  |
| CEU | DEFA1 | 7367649 | 1.8141  | 1.8762  | -0.0791 |
| CEU | DEFA1 | 7372649 | 1.9695  | 2.0467  | -0.0919 |
| CEU | DEFA1 | 7377649 | 1.6221  | 1.1939  | 0.7631  |
| CEU | DEFA1 | 7382649 | 1.1406  | 0.5117  | 1.9724  |
| CEU | DEFA1 | 7387649 | 1.9326  | 1.0234  | 1.8066  |
| CEU | DEFA1 | 7392649 | 0.9322  | 0.6822  | 0.6528  |
| CEU | DEFA1 | 7397649 | 0.1503  | 0.3411  | -0.7649 |
| CEU | DEFA1 | 7402649 | 1.9163  | 2.5584  | -0.6396 |
| CEU | DEFA1 | 7407649 | 1.9062  | 2.3879  | -0.5073 |
| CEU | DEFA1 | 7412649 | 0       | 0       | 0       |
| CEU | DEFA1 | 7417649 | 0       | 0       | 0       |
| CEU | DEFA1 | 7422649 | 0.04    | 0.3411  | -1.207  |
| CEU | DEFA1 | 7427649 | 0.12    | 0.6822  | -1.4681 |
| CEU | DEFA1 | 7432649 | 0.08    | 0.3411  | -1.0467 |
| CEU | DEFA1 | 7437649 | 0.0101  | 0.1706  | -0.9534 |
| CEU | DEFA1 | 7442649 | 0.5135  | 0.8528  | -0.7641 |
| CEU | DEFA1 | 7447649 | 1.4587  | 2.2173  | -0.8475 |
| CEU | DEFA1 | 7452649 | 1.5993  | 2.2173  | -0.6904 |
| CEU | DEFA1 | 7457649 | 0.6743  | 1.1939  | -0.9259 |
| CEU | DEFA1 | 7462649 | 0.784   | 1.8762  | -1.3906 |
| CEU | DEFA1 | 7467649 | 1.5001  | 2.2173  | -0.8012 |
| CEU | DEFA1 | 7472649 | 1.322   | 1.7056  | -0.5254 |
| CHB | DEFA1 | 6482649 | 14.0772 | 14.5697 | -0.1037 |
| CHB | DEFA1 | 6487649 | 13.6936 | 13.892  | -0.0437 |
| CHB | DEFA1 | 6492649 | 16.3468 | 17.958  | -0.2778 |
| CHB | DEFA1 | 6497649 | 9.3381  | 14.7391 | -1.1247 |
| CHB | DEFA1 | 6502649 | 7.0833  | 11.3508 | -1.1377 |
| CHB | DEFA1 | 6507649 | 11.3751 | 16.6027 | -0.9717 |
| CHB | DEFA1 | 6512649 | 16.809  | 24.2264 | -0.958  |
| CHB | DEFA1 | 6517649 | 17.0372 | 23.2099 | -0.8311 |
| CHB | DEFA1 | 6522649 | 13.3071 | 17.6192 | -0.7572 |
| CHB | DEFA1 | 6527649 | 13.999  | 16.2638 | -0.4294 |
| CHB | DEFA1 | 6532649 | 15.85   | 17.958  | -0.3635 |
| CHB | DEFA1 | 6537649 | 11.958  | 17.6192 | -0.9941 |
| CHB | DEFA1 | 6542649 | 8.0388  | 15.7556 | -1.508  |
| CHB | DEFA1 | 6547649 | 7.6273  | 15.7556 | -1.5884 |
| CHB | DEFA1 | 6552649 | 9.2012  | 16.6027 | -1.3758 |
| CHB | DEFA1 | 6557649 | 15.7763 | 19.1439 | -0.546  |
| CHB | DEFA1 | 6562649 | 17.9764 | 18.1274 | -0.0258 |
| CHB | DEFA1 | 6567649 | 19.0525 | 17.7886 | 0.2199  |
| CHB | DEFA1 | 6572649 | 16.7512 | 18.4662 | -0.2879 |
| CHB | DEFA1 | 6577649 | 12.6242 | 15.2474 | -0.5289 |
| CHB | DEFA1 | 6582649 | 12.6895 | 13.892  | -0.2649 |

## 2\_TajimasD\_data

|     |       |         |         |         |         |
|-----|-------|---------|---------|---------|---------|
| CHB | DEFA1 | 6587649 | 11.6589 | 13.2144 | -0.3593 |
| CHB | DEFA1 | 6592649 | 10.8547 | 12.7061 | -0.4438 |
| CHB | DEFA1 | 6597649 | 8.8188  | 11.6896 | -0.7445 |
| CHB | DEFA1 | 6602649 | 8.2555  | 10.6731 | -0.6828 |
| CHB | DEFA1 | 6607649 | 10.8608 | 13.892  | -0.6678 |
| CHB | DEFA1 | 6612649 | 10.9191 | 16.4333 | -1.0351 |
| CHB | DEFA1 | 6617649 | 10.7226 | 14.4003 | -0.783  |
| CHB | DEFA1 | 6622649 | 9.7131  | 12.8755 | -0.7487 |
| CHB | DEFA1 | 6627649 | 17.8174 | 17.958  | -0.0242 |
| CHB | DEFA1 | 6632649 | 29.2486 | 22.1934 | 0.992   |
| CHB | DEFA1 | 6637649 | 30.8273 | 23.3793 | 0.9957  |
| CHB | DEFA1 | 6642649 | 29.6716 | 22.7016 | 0.9587  |
| CHB | DEFA1 | 6647649 | 26.7632 | 20.8381 | 0.8853  |
| CHB | DEFA1 | 6652649 | 19.1315 | 18.8051 | 0.0538  |
| CHB | DEFA1 | 6657649 | 16.0268 | 14.9085 | 0.2304  |
| CHB | DEFA1 | 6662649 | 21.2538 | 15.5862 | 1.1191  |
| CHB | DEFA1 | 6667649 | 13.7443 | 12.3673 | 0.3386  |
| CHB | DEFA1 | 6672649 | 9.4616  | 10.6731 | -0.3422 |
| CHB | DEFA1 | 6677649 | 13.1064 | 12.3673 | 0.1818  |
| CHB | DEFA1 | 6682649 | 12.9729 | 12.3673 | 0.1489  |
| CHB | DEFA1 | 6687649 | 14.5892 | 17.6192 | -0.5321 |
| CHB | DEFA1 | 6692649 | 22.8874 | 24.2264 | -0.1729 |
| CHB | DEFA1 | 6697649 | 25.1432 | 23.3793 | 0.2358  |
| CHB | DEFA1 | 6702649 | 17.7474 | 19.1439 | -0.2264 |
| CHB | DEFA1 | 6707649 | 19.4139 | 21.3463 | -0.2821 |
| CHB | DEFA1 | 6712649 | 27.3501 | 26.7676 | 0.0683  |
| CHB | DEFA1 | 6717649 | 27.7076 | 27.9535 | -0.0276 |
| CHB | DEFA1 | 6722649 | 30.6552 | 26.937  | 0.4332  |
| CHB | DEFA1 | 6727649 | 35.6383 | 27.6147 | 0.9126  |
| CHB | DEFA1 | 6732649 | 33.8709 | 26.7676 | 0.8328  |
| CHB | DEFA1 | 6737649 | 31.9208 | 23.8875 | 1.0518  |
| CHB | DEFA1 | 6742649 | 22.1376 | 20.4992 | 0.2487  |
| CHB | DEFA1 | 6747649 | 15.9098 | 18.2968 | -0.4042 |
| CHB | DEFA1 | 6752649 | 18.6387 | 18.4662 | 0.029   |
| CHB | DEFA1 | 6757649 | 23.2804 | 22.3628 | 0.1281  |
| CHB | DEFA1 | 6762649 | 44.304  | 27.9535 | 1.8377  |
| CHB | DEFA1 | 6767649 | 36.7794 | 21.8545 | 2.1299  |
| CHB | DEFA1 | 6772649 | 10.9132 | 14.0615 | -0.6856 |
| CHB | DEFA1 | 6777649 | 14.9634 | 15.0779 | -0.0233 |
| CHB | DEFA1 | 6782649 | 18.4711 | 16.4333 | 0.3825  |
| CHB | DEFA1 | 6787649 | 23.8409 | 20.4992 | 0.5073  |
| CHB | DEFA1 | 6792649 | 22.47   | 17.6192 | 0.8518  |
| CHB | DEFA1 | 6797649 | 15.5871 | 14.4003 | 0.2527  |
| CHB | DEFA1 | 6802649 | 12.7834 | 14.7391 | -0.4073 |
| CHB | DEFA1 | 6807649 | 9.9332  | 12.0285 | -0.529  |
| CHB | DEFA1 | 6812649 | 9.0228  | 11.1814 | -0.5837 |
| CHB | DEFA1 | 6817649 | 10.8795 | 12.7061 | -0.4379 |
| CHB | DEFA1 | 6822649 | 17.7478 | 18.8051 | -0.1744 |
| CHB | DEFA1 | 6827649 | 18.7485 | 19.8216 | -0.1683 |

## 2\_TajimasD\_data

|     |       |         |         |         |         |
|-----|-------|---------|---------|---------|---------|
| CHB | DEFA1 | 6832649 | 8.5778  | 9.9955  | -0.4257 |
| CHB | DEFA1 | 6837649 | 1.7794  | 3.7271  | -1.415  |
| CHB | DEFA1 | 6842649 | 3.2305  | 3.0495  | 0.1557  |
| CHB | DEFA1 | 6847649 | 2.2878  | 1.6942  | 0.8146  |
| CHB | DEFA1 | 6852649 | 0.3116  | 1.3553  | -1.6915 |
| CHB | DEFA1 | 6857649 | 2.6271  | 2.7106  | -0.0791 |
| CHB | DEFA1 | 6862649 | 3.344   | 2.7106  | 0.6002  |
| CHB | DEFA1 | 6867649 | 1.367   | 1.1859  | 0.3233  |
| CHB | DEFA1 | 6872649 | 6.3956  | 5.5907  | 0.4107  |
| CHB | DEFA1 | 6877649 | 13.1302 | 13.7226 | -0.132  |
| CHB | DEFA1 | 6882649 | 12.0264 | 14.4003 | -0.5054 |
| CHB | DEFA1 | 6887649 | 12.4682 | 12.3673 | 0.0248  |
| CHB | DEFA1 | 6892649 | 28.9863 | 19.1439 | 1.5959  |
| CHB | DEFA1 | 6897649 | 44.7263 | 26.937  | 2.0728  |
| CHB | DEFA1 | 6902649 | 39.0327 | 23.5487 | 2.0557  |
| CHB | DEFA1 | 6907649 | 26.3301 | 16.2638 | 1.9084  |
| CHB | DEFA1 | 6912649 | 14.9435 | 11.6896 | 0.8438  |
| CHB | DEFA1 | 6917649 | 8.5393  | 11.5202 | -0.7837 |
| CHB | DEFA1 | 6922649 | 11.5705 | 16.0944 | -0.8663 |
| CHB | DEFA1 | 6927649 | 16.0197 | 18.4662 | -0.4107 |
| CHB | DEFA1 | 6932649 | 15.6795 | 18.8051 | -0.5156 |
| CHB | DEFA1 | 6937649 | 17.4275 | 24.2264 | -0.8781 |
| CHB | DEFA1 | 6942649 | 21.5372 | 27.7841 | -0.7063 |
| CHB | DEFA1 | 6947649 | 30.0515 | 31.5112 | -0.146  |
| CHB | DEFA1 | 6952649 | 29.1772 | 30.8335 | -0.1692 |
| CHB | DEFA1 | 6957649 | 21.741  | 26.7676 | -0.5893 |
| CHB | DEFA1 | 6962649 | 18.5019 | 25.9205 | -0.8973 |
| CHB | DEFA1 | 6967649 | 11.7801 | 22.3628 | -1.477  |
| CHB | DEFA1 | 6972649 | 12.3343 | 21.3463 | -1.3156 |
| CHB | DEFA1 | 6977649 | 18.2402 | 23.0404 | -0.6509 |
| CHB | DEFA1 | 6982649 | 27.0204 | 30.4947 | -0.3588 |
| CHB | DEFA1 | 6987649 | 30.3074 | 29.8171 | 0.0517  |
| CHB | DEFA1 | 6992649 | 26.1784 | 22.1934 | 0.5603  |
| CHB | DEFA1 | 6997649 | 25.4698 | 25.2428 | 0.0282  |
| CHB | DEFA1 | 7002649 | 30.6944 | 30.3253 | 0.0383  |
| CHB | DEFA1 | 7007649 | 38.8762 | 32.0194 | 0.6751  |
| CHB | DEFA1 | 7012649 | 24.4889 | 21.8545 | 0.3759  |
| CHB | DEFA1 | 7017649 | 5.2039  | 8.8096  | -1.2174 |
| CHB | DEFA1 | 7022649 | 8.5201  | 8.3013  | 0.078   |
| CHB | DEFA1 | 7027649 | 12.2945 | 8.4708  | 1.3386  |
| CHB | DEFA1 | 7032649 | 8.6731  | 7.9625  | 0.2633  |
| CHB | DEFA1 | 7037649 | 3.6244  | 6.4378  | -1.265  |
| CHB | DEFA1 | 7042649 | 5.118   | 7.2848  | -0.871  |
| CHB | DEFA1 | 7047649 | 8.4422  | 8.6402  | -0.0681 |
| CHB | DEFA1 | 7052649 | 11.5852 | 9.6567  | 0.598   |
| CHB | DEFA1 | 7057649 | 16.0539 | 11.6896 | 1.1318  |
| CHB | DEFA1 | 7062649 | 15.2686 | 11.5202 | 0.9855  |
| CHB | DEFA1 | 7067649 | 7.2421  | 7.1154  | 0.052   |
| CHB | DEFA1 | 7072649 | 2.0933  | 3.5577  | -1.1067 |

## 2\_TajimasD\_data

|     |       |         |        |         |         |
|-----|-------|---------|--------|---------|---------|
| CHB | DEFA1 | 7077649 | 4.5551 | 8.6402  | -1.4042 |
| CHB | DEFA1 | 7082649 | 7.4365 | 8.1319  | -0.2528 |
| CHB | DEFA1 | 7087649 | 4.849  | 2.5412  | 2.3045  |
| CHB | DEFA1 | 7092649 | 0.8643 | 0.6777  | 0.4878  |
| CHB | DEFA1 | 7097649 | 0.3859 | 0.1694  | 1.2865  |
| CHB | DEFA1 | 7102649 | 0.446  | 0.5082  | -0.1953 |
| CHB | DEFA1 | 7107649 | 2.6326 | 2.7106  | -0.0739 |
| CHB | DEFA1 | 7112649 | 2.1866 | 2.2024  | -0.0177 |
| CHB | DEFA1 | 7117649 | 0      | 0       | 0       |
| CHB | DEFA1 | 7122649 | 0      | 0       | 0       |
| CHB | DEFA1 | 7127649 | 1.2524 | 1.3553  | -0.1668 |
| CHB | DEFA1 | 7132649 | 1.2621 | 1.5247  | -0.3901 |
| CHB | DEFA1 | 7137649 | 0.0097 | 0.1694  | -0.949  |
| CHB | DEFA1 | 7142649 | 0.0659 | 0.1694  | -0.615  |
| CHB | DEFA1 | 7147649 | 0.7006 | 0.6777  | 0.0599  |
| CHB | DEFA1 | 7152649 | 7.1462 | 15.925  | -1.6981 |
| CHB | DEFA1 | 7157649 | 7.1715 | 16.9415 | -1.7813 |
| CHB | DEFA1 | 7162649 | 0.8321 | 2.8801  | -1.8465 |
| CHB | DEFA1 | 7167649 | 0.4205 | 3.2189  | -2.3007 |
| CHB | DEFA1 | 7172649 | 0.6602 | 4.7436  | -2.4087 |
| CHB | DEFA1 | 7177649 | 0.518  | 4.066   | -2.3925 |
| CHB | DEFA1 | 7182649 | 0.6054 | 2.2024  | -1.7882 |
| CHB | DEFA1 | 7187649 | 1.5574 | 5.5907  | -2.0579 |
| CHB | DEFA1 | 7192649 | 2.0182 | 7.4543  | -2.1398 |
| CHB | DEFA1 | 7197649 | 2.8406 | 8.3013  | -1.9475 |
| CHB | DEFA1 | 7202649 | 3.7451 | 12.7061 | -2.1482 |
| CHB | DEFA1 | 7207649 | 4.3061 | 12.3673 | -1.9824 |
| CHB | DEFA1 | 7212649 | 4.5389 | 8.6402  | -1.4098 |
| CHB | DEFA1 | 7217649 | 4.3573 | 9.3178  | -1.59   |
| CHB | DEFA1 | 7222649 | 3.9254 | 10.1649 | -1.8445 |
| CHB | DEFA1 | 7227649 | 3.4457 | 5.5907  | -1.0944 |
| CHB | DEFA1 | 7232649 | 3.003  | 3.5577  | -0.4192 |
| CHB | DEFA1 | 7237649 | 2.509  | 6.4378  | -1.7665 |
| CHB | DEFA1 | 7242649 | 3.7687 | 7.9625  | -1.5541 |
| CHB | DEFA1 | 7247649 | 3.1129 | 7.1154  | -1.6437 |
| CHB | DEFA1 | 7252649 | 3.5521 | 7.1154  | -1.4633 |
| CHB | DEFA1 | 7257649 | 5.1845 | 6.0989  | -0.4316 |
| CHB | DEFA1 | 7262649 | 4.8197 | 5.0825  | -0.1459 |
| CHB | DEFA1 | 7267649 | 3.7799 | 5.2519  | -0.7939 |
| CHB | DEFA1 | 7272649 | 2.7411 | 7.1154  | -1.7964 |
| CHB | DEFA1 | 7277649 | 1.9187 | 7.7931  | -2.2202 |
| CHB | DEFA1 | 7282649 | 0.6585 | 3.2189  | -2.105  |
| CHB | DEFA1 | 7287649 | 1.206  | 1.6942  | -0.67   |
| CHB | DEFA1 | 7292649 | 2.6849 | 2.5412  | 0.1435  |
| CHB | DEFA1 | 7297649 | 1.7756 | 1.6942  | 0.1117  |
| CHB | DEFA1 | 7302649 | 0.1249 | 1.1859  | -1.8939 |
| CHB | DEFA1 | 7307649 | 0.8469 | 2.033   | -1.4144 |
| CHB | DEFA1 | 7312649 | 0.8934 | 2.033   | -1.359  |
| CHB | DEFA1 | 7317649 | 0.1711 | 1.0165  | -1.6824 |

## 2\_TajimasD\_data

|     |       |         |         |         |         |
|-----|-------|---------|---------|---------|---------|
| CHB | DEFA1 | 7322649 | 0.3356  | 1.0165  | -1.355  |
| CHB | DEFA1 | 7327649 | 2.1317  | 2.5412  | -0.4089 |
| CHB | DEFA1 | 7332649 | 2.333   | 4.4048  | -1.3037 |
| CHB | DEFA1 | 7337649 | 1.4778  | 3.0495  | -1.3517 |
| CHB | DEFA1 | 7342649 | 1.5406  | 1.5247  | 0.0236  |
| CHB | DEFA1 | 7347649 | 0.6632  | 1.1859  | -0.933  |
| CHB | DEFA1 | 7352649 | 0.7613  | 2.3718  | -1.7    |
| CHB | DEFA1 | 7357649 | 0.831   | 2.5412  | -1.7078 |
| CHB | DEFA1 | 7362649 | 1.841   | 2.033   | -0.229  |
| CHB | DEFA1 | 7367649 | 1.9457  | 3.0495  | -0.9493 |
| CHB | DEFA1 | 7372649 | 1.6276  | 2.7106  | -1.0262 |
| CHB | DEFA1 | 7377649 | 1.351   | 1.1859  | 0.2947  |
| CHB | DEFA1 | 7382649 | 1.0529  | 0.8471  | 0.4641  |
| CHB | DEFA1 | 7387649 | 1.6688  | 1.6942  | -0.0349 |
| CHB | DEFA1 | 7392649 | 0.7122  | 1.8636  | -1.469  |
| CHB | DEFA1 | 7397649 | 0.1157  | 1.3553  | -2.009  |
| CHB | DEFA1 | 7402649 | 1.9393  | 2.2024  | -0.2946 |
| CHB | DEFA1 | 7407649 | 1.9199  | 1.8636  | 0.0718  |
| CHB | DEFA1 | 7412649 | 0       | 0       | 0       |
| CHB | DEFA1 | 7417649 | 0       | 0       | 0       |
| CHB | DEFA1 | 7422649 | 0       | 0       | 0       |
| CHB | DEFA1 | 7427649 | 0.0097  | 0.1694  | -0.949  |
| CHB | DEFA1 | 7432649 | 0.0097  | 0.1694  | -0.949  |
| CHB | DEFA1 | 7437649 | 0.134   | 0.1694  | -0.2104 |
| CHB | DEFA1 | 7442649 | 0.6669  | 1.0165  | -0.6957 |
| CHB | DEFA1 | 7447649 | 1.8987  | 2.2024  | -0.3401 |
| CHB | DEFA1 | 7452649 | 1.9585  | 2.3718  | -0.4363 |
| CHB | DEFA1 | 7457649 | 0.612   | 1.1859  | -1.0244 |
| CHB | DEFA1 | 7462649 | 0.5089  | 1.5247  | -1.5091 |
| CHB | DEFA1 | 7467649 | 1.0417  | 2.7106  | -1.5814 |
| CHB | DEFA1 | 7472649 | 1.056   | 1.5247  | -0.6963 |
| YRI | DEFA1 | 6482649 | 18.8686 | 30.7554 | -1.2132 |
| YRI | DEFA1 | 6487649 | 18.9227 | 25.7135 | -0.8251 |
| YRI | DEFA1 | 6492649 | 20.0849 | 24.8732 | -0.6008 |
| YRI | DEFA1 | 6497649 | 14.0208 | 22.5203 | -1.1743 |
| YRI | DEFA1 | 6502649 | 11.4621 | 20.3355 | -1.3529 |
| YRI | DEFA1 | 6507649 | 15.2039 | 25.3774 | -1.2519 |
| YRI | DEFA1 | 6512649 | 25.2336 | 35.4611 | -0.9083 |
| YRI | DEFA1 | 6517649 | 27.5771 | 33.4444 | -0.5518 |
| YRI | DEFA1 | 6522649 | 19.7617 | 23.5287 | -0.4988 |
| YRI | DEFA1 | 6527649 | 18.1825 | 22.1842 | -0.561  |
| YRI | DEFA1 | 6532649 | 20.2625 | 27.3941 | -0.8147 |
| YRI | DEFA1 | 6537649 | 18.803  | 28.7386 | -1.0834 |
| YRI | DEFA1 | 6542649 | 14.1635 | 23.1926 | -1.2124 |
| YRI | DEFA1 | 6547649 | 12.31   | 25.5455 | -1.6183 |
| YRI | DEFA1 | 6552649 | 15.1388 | 27.3941 | -1.4001 |
| YRI | DEFA1 | 6557649 | 20.058  | 23.0245 | -0.4012 |
| YRI | DEFA1 | 6562649 | 21.6777 | 22.8565 | -0.1605 |
| YRI | DEFA1 | 6567649 | 20.2303 | 26.89   | -0.7747 |

## 2\_TajimasD\_data

|     |       |         |         |         |         |
|-----|-------|---------|---------|---------|---------|
| YRI | DEFA1 | 6572649 | 19.4544 | 30.4193 | -1.1312 |
| YRI | DEFA1 | 6577649 | 20.2901 | 30.0831 | -1.0213 |
| YRI | DEFA1 | 6582649 | 19.3186 | 27.058  | -0.8949 |
| YRI | DEFA1 | 6587649 | 14.1623 | 21.68   | -1.0775 |
| YRI | DEFA1 | 6592649 | 13.6407 | 19.9994 | -0.9852 |
| YRI | DEFA1 | 6597649 | 12.4535 | 20.6717 | -1.2334 |
| YRI | DEFA1 | 6602649 | 11.3294 | 20.1675 | -1.3583 |
| YRI | DEFA1 | 6607649 | 13.9857 | 19.8313 | -0.9131 |
| YRI | DEFA1 | 6612649 | 13.3356 | 18.6549 | -0.8812 |
| YRI | DEFA1 | 6617649 | 14.2085 | 20.8397 | -0.9874 |
| YRI | DEFA1 | 6622649 | 13.2586 | 21.68   | -1.2071 |
| YRI | DEFA1 | 6627649 | 22.1358 | 28.9067 | -0.7341 |
| YRI | DEFA1 | 6632649 | 35.3697 | 36.8056 | -0.123  |
| YRI | DEFA1 | 6637649 | 40.1643 | 32.6041 | 0.7289  |
| YRI | DEFA1 | 6642649 | 36.2388 | 27.5622 | 0.9854  |
| YRI | DEFA1 | 6647649 | 28.4601 | 26.3858 | 0.2458  |
| YRI | DEFA1 | 6652649 | 19.7249 | 23.0245 | -0.4462 |
| YRI | DEFA1 | 6657649 | 15.3827 | 21.3439 | -0.8674 |
| YRI | DEFA1 | 6662649 | 23.6953 | 25.2093 | -0.1875 |
| YRI | DEFA1 | 6667649 | 19.6409 | 23.1926 | -0.4769 |
| YRI | DEFA1 | 6672649 | 14.1476 | 22.0162 | -1.1112 |
| YRI | DEFA1 | 6677649 | 16.5205 | 22.1842 | -0.794  |
| YRI | DEFA1 | 6682649 | 17.7735 | 22.6884 | -0.6742 |
| YRI | DEFA1 | 6687649 | 22.9099 | 27.8983 | -0.5599 |
| YRI | DEFA1 | 6692649 | 32.5306 | 34.2847 | -0.161  |
| YRI | DEFA1 | 6697649 | 32.0889 | 34.2847 | -0.2015 |
| YRI | DEFA1 | 6702649 | 23.7436 | 31.2596 | -0.755  |
| YRI | DEFA1 | 6707649 | 27.7157 | 36.6376 | -0.7674 |
| YRI | DEFA1 | 6712649 | 49.3491 | 43.5281 | 0.4228  |
| YRI | DEFA1 | 6717649 | 56.2682 | 42.8559 | 0.9892  |
| YRI | DEFA1 | 6722649 | 44.7397 | 40.1669 | 0.3594  |
| YRI | DEFA1 | 6727649 | 37.7014 | 42.0156 | -0.3244 |
| YRI | DEFA1 | 6732649 | 33.0659 | 40.8391 | -0.6011 |
| YRI | DEFA1 | 6737649 | 35.0029 | 37.1417 | -0.1815 |
| YRI | DEFA1 | 6742649 | 28.7421 | 33.1083 | -0.4147 |
| YRI | DEFA1 | 6747649 | 21.2409 | 32.6041 | -1.0955 |
| YRI | DEFA1 | 6752649 | 20.9097 | 30.5873 | -0.993  |
| YRI | DEFA1 | 6757649 | 33.7259 | 33.9486 | -0.0206 |
| YRI | DEFA1 | 6762649 | 53.4136 | 41.6794 | 0.8894  |
| YRI | DEFA1 | 6767649 | 37.2749 | 33.1083 | 0.3957  |
| YRI | DEFA1 | 6772649 | 14.6033 | 23.3606 | -1.1677 |
| YRI | DEFA1 | 6777649 | 17.1853 | 25.0413 | -0.9793 |
| YRI | DEFA1 | 6782649 | 19.6796 | 26.3858 | -0.7946 |
| YRI | DEFA1 | 6787649 | 23.0519 | 27.2261 | -0.4797 |
| YRI | DEFA1 | 6792649 | 21.2222 | 26.89   | -0.6593 |
| YRI | DEFA1 | 6797649 | 16.002  | 26.89   | -1.2666 |
| YRI | DEFA1 | 6802649 | 14.2471 | 24.7051 | -1.3209 |
| YRI | DEFA1 | 6807649 | 14.0294 | 21.512  | -1.0806 |
| YRI | DEFA1 | 6812649 | 14.8413 | 23.6968 | -1.1646 |



## 2\_TajimasD\_data

|     |       |         |         |         |         |
|-----|-------|---------|---------|---------|---------|
| YRI | DEFA1 | 6817649 | 17.2059 | 24.201  | -0.9014 |
| YRI | DEFA1 | 6822649 | 23.6394 | 28.2345 | -0.5098 |
| YRI | DEFA1 | 6827649 | 22.6097 | 26.0496 | -0.4127 |
| YRI | DEFA1 | 6832649 | 11.3332 | 11.7644 | -0.1108 |
| YRI | DEFA1 | 6837649 | 4.7804  | 5.7141  | -0.4656 |
| YRI | DEFA1 | 6842649 | 4.9347  | 5.5461  | -0.3131 |
| YRI | DEFA1 | 6847649 | 3.4184  | 2.8571  | 0.5076  |
| YRI | DEFA1 | 6852649 | 1.3512  | 2.5209  | -1.1714 |
| YRI | DEFA1 | 6857649 | 3.9575  | 5.2099  | -0.6779 |
| YRI | DEFA1 | 6862649 | 5.1205  | 5.378   | -0.1355 |
| YRI | DEFA1 | 6867649 | 2.1398  | 2.689   | -0.5219 |
| YRI | DEFA1 | 6872649 | 7.9984  | 9.7476  | -0.5358 |
| YRI | DEFA1 | 6877649 | 17.922  | 24.5371 | -0.8411 |
| YRI | DEFA1 | 6882649 | 16.5678 | 27.3941 | -1.2368 |
| YRI | DEFA1 | 6887649 | 13.7046 | 23.8648 | -1.3271 |
| YRI | DEFA1 | 6892649 | 29.028  | 31.0915 | -0.2084 |
| YRI | DEFA1 | 6897649 | 45.7533 | 38.8224 | 0.5633  |
| YRI | DEFA1 | 6902649 | 41.3769 | 34.1166 | 0.6696  |
| YRI | DEFA1 | 6907649 | 27.9571 | 27.3941 | 0.0643  |
| YRI | DEFA1 | 6912649 | 15.5806 | 22.3523 | -0.9424 |
| YRI | DEFA1 | 6917649 | 12.4665 | 20.5036 | -1.2157 |
| YRI | DEFA1 | 6922649 | 19.3963 | 29.4109 | -1.0677 |
| YRI | DEFA1 | 6927649 | 24.3819 | 35.4611 | -0.9839 |
| YRI | DEFA1 | 6932649 | 22.899  | 34.7889 | -1.0759 |
| YRI | DEFA1 | 6937649 | 21.0881 | 34.9569 | -1.249  |
| YRI | DEFA1 | 6942649 | 22.498  | 35.7973 | -1.1702 |
| YRI | DEFA1 | 6947649 | 32.5973 | 42.0156 | -0.7083 |
| YRI | DEFA1 | 6952649 | 33.1663 | 41.5114 | -0.6351 |
| YRI | DEFA1 | 6957649 | 26.4933 | 35.9653 | -0.8296 |
| YRI | DEFA1 | 6962649 | 23.1577 | 32.7721 | -0.9223 |
| YRI | DEFA1 | 6967649 | 16.688  | 29.4109 | -1.3564 |
| YRI | DEFA1 | 6972649 | 17.9316 | 31.5957 | -1.3584 |
| YRI | DEFA1 | 6977649 | 23.877  | 31.9318 | -0.7925 |
| YRI | DEFA1 | 6982649 | 29.3527 | 39.9988 | -0.8402 |
| YRI | DEFA1 | 6987649 | 28.5245 | 39.8307 | -0.896  |
| YRI | DEFA1 | 6992649 | 23.0741 | 28.7386 | -0.6177 |
| YRI | DEFA1 | 6997649 | 26.9312 | 34.7889 | -0.711  |
| YRI | DEFA1 | 7002649 | 38.6209 | 41.0072 | -0.1838 |
| YRI | DEFA1 | 7007649 | 45.393  | 41.8475 | 0.2677  |
| YRI | DEFA1 | 7012649 | 27.9497 | 28.4025 | -0.0499 |
| YRI | DEFA1 | 7017649 | 9.8027  | 13.2769 | -0.7962 |
| YRI | DEFA1 | 7022649 | 12.1483 | 12.6047 | -0.1099 |
| YRI | DEFA1 | 7027649 | 13.1542 | 12.6047 | 0.1323  |
| YRI | DEFA1 | 7032649 | 11.9106 | 13.2769 | -0.3131 |
| YRI | DEFA1 | 7037649 | 8.1468  | 9.7476  | -0.4904 |
| YRI | DEFA1 | 7042649 | 8.0455  | 10.5879 | -0.721  |
| YRI | DEFA1 | 7047649 | 11.894  | 13.1089 | -0.2818 |
| YRI | DEFA1 | 7052649 | 15.99   | 16.6382 | -0.1198 |
| YRI | DEFA1 | 7057649 | 21.5738 | 20.1675 | 0.2161  |

## 2\_TajimasD\_data

|     |       |         |         |         |         |
|-----|-------|---------|---------|---------|---------|
| YRI | DEFA1 | 7062649 | 19.5686 | 16.302  | 0.6158  |
| YRI | DEFA1 | 7067649 | 8.9983  | 8.4031  | 0.2092  |
| YRI | DEFA1 | 7072649 | 2.5808  | 3.6974  | -0.8139 |
| YRI | DEFA1 | 7077649 | 4.3475  | 7.3947  | -1.2041 |
| YRI | DEFA1 | 7082649 | 6.4872  | 7.7309  | -0.4719 |
| YRI | DEFA1 | 7087649 | 4.4196  | 4.0335  | 0.2612  |
| YRI | DEFA1 | 7092649 | 0.9667  | 1.5126  | -0.8129 |
| YRI | DEFA1 | 7097649 | 0.2903  | 1.0084  | -1.4317 |
| YRI | DEFA1 | 7102649 | 0.764   | 2.3529  | -1.6819 |
| YRI | DEFA1 | 7107649 | 2.2594  | 5.8822  | -1.7604 |
| YRI | DEFA1 | 7112649 | 1.6968  | 4.3696  | -1.6877 |
| YRI | DEFA1 | 7117649 | 0       | 0       | 0       |
| YRI | DEFA1 | 7122649 | 0       | 0       | 0       |
| YRI | DEFA1 | 7127649 | 1.6231  | 1.5126  | 0.1645  |
| YRI | DEFA1 | 7132649 | 1.6783  | 1.8487  | -0.218  |
| YRI | DEFA1 | 7137649 | 0.0552  | 0.3361  | -1.1277 |
| YRI | DEFA1 | 7142649 | 0.1681  | 0.1681  | 0       |
| YRI | DEFA1 | 7147649 | 1.6615  | 1.0084  | 1.3021  |
| YRI | DEFA1 | 7152649 | 11.4297 | 18.991  | -1.2313 |
| YRI | DEFA1 | 7157649 | 10.8502 | 21.0078 | -1.5009 |
| YRI | DEFA1 | 7162649 | 3.2063  | 5.2099  | -1.0845 |
| YRI | DEFA1 | 7167649 | 5.0123  | 6.3864  | -0.6202 |
| YRI | DEFA1 | 7172649 | 4.703   | 8.4031  | -1.3004 |
| YRI | DEFA1 | 7177649 | 3.6383  | 6.2183  | -1.1927 |
| YRI | DEFA1 | 7182649 | 2.3609  | 3.8654  | -1.0558 |
| YRI | DEFA1 | 7187649 | 5.1223  | 9.7476  | -1.4169 |
| YRI | DEFA1 | 7192649 | 7.3507  | 11.4282 | -1.0765 |
| YRI | DEFA1 | 7197649 | 10.3949 | 11.5963 | -0.3129 |
| YRI | DEFA1 | 7202649 | 13.4241 | 17.9827 | -0.7823 |
| YRI | DEFA1 | 7207649 | 10.6011 | 16.4701 | -1.0956 |
| YRI | DEFA1 | 7212649 | 8.6394  | 14.1172 | -1.1844 |
| YRI | DEFA1 | 7217649 | 8.0842  | 16.4701 | -1.5655 |
| YRI | DEFA1 | 7222649 | 8.0033  | 18.3188 | -1.7391 |
| YRI | DEFA1 | 7227649 | 6.662   | 12.9408 | -1.4744 |
| YRI | DEFA1 | 7232649 | 4.1183  | 5.7141  | -0.7958 |
| YRI | DEFA1 | 7237649 | 4.2027  | 8.7392  | -1.5378 |
| YRI | DEFA1 | 7242649 | 6.3645  | 14.2853 | -1.6935 |
| YRI | DEFA1 | 7247649 | 5.3532  | 13.613  | -1.8487 |
| YRI | DEFA1 | 7252649 | 5.6303  | 12.1005 | -1.6187 |
| YRI | DEFA1 | 7257649 | 6.9081  | 9.9157  | -0.9068 |
| YRI | DEFA1 | 7262649 | 5.0813  | 6.2183  | -0.5256 |
| YRI | DEFA1 | 7267649 | 3.5136  | 6.3864  | -1.2966 |
| YRI | DEFA1 | 7272649 | 3.7943  | 10.924  | -1.9637 |
| YRI | DEFA1 | 7277649 | 4.1374  | 12.9408 | -2.0672 |
| YRI | DEFA1 | 7282649 | 2.1944  | 6.5544  | -1.9222 |
| YRI | DEFA1 | 7287649 | 1.816   | 2.689   | -0.8297 |
| YRI | DEFA1 | 7292649 | 2.9284  | 4.0335  | -0.7477 |
| YRI | DEFA1 | 7297649 | 2.1385  | 5.0419  | -1.6177 |
| YRI | DEFA1 | 7302649 | 1.1899  | 6.2183  | -2.3246 |

## 2\_TajimasD\_data

|     |       |         |         |         |         |
|-----|-------|---------|---------|---------|---------|
| YRI | DEFA1 | 7307649 | 1.6533  | 6.2183  | -2.1104 |
| YRI | DEFA1 | 7312649 | 1.4905  | 4.3696  | -1.8179 |
| YRI | DEFA1 | 7317649 | 0.365   | 1.8487  | -1.8978 |
| YRI | DEFA1 | 7322649 | 0.7639  | 1.1764  | -0.7378 |
| YRI | DEFA1 | 7327649 | 2.908   | 4.5377  | -0.9958 |
| YRI | DEFA1 | 7332649 | 3.5086  | 7.8989  | -1.6333 |
| YRI | DEFA1 | 7337649 | 2.2474  | 6.5544  | -1.8989 |
| YRI | DEFA1 | 7342649 | 1.8812  | 3.5293  | -1.2496 |
| YRI | DEFA1 | 7347649 | 1.0442  | 2.0167  | -1.1628 |
| YRI | DEFA1 | 7352649 | 2.093   | 3.6974  | -1.1694 |
| YRI | DEFA1 | 7357649 | 2.4375  | 3.5293  | -0.8278 |
| YRI | DEFA1 | 7362649 | 1.7831  | 2.0167  | -0.2793 |
| YRI | DEFA1 | 7367649 | 3.0507  | 3.3612  | -0.2453 |
| YRI | DEFA1 | 7372649 | 3.7848  | 3.6974  | 0.0637  |
| YRI | DEFA1 | 7377649 | 2.0897  | 1.6806  | 0.5628  |
| YRI | DEFA1 | 7382649 | 0.6723  | 1.1764  | -0.9016 |
| YRI | DEFA1 | 7387649 | 1.3384  | 2.1848  | -0.9503 |
| YRI | DEFA1 | 7392649 | 0.8767  | 2.689   | -1.7223 |
| YRI | DEFA1 | 7397649 | 0.3182  | 2.0167  | -2.0308 |
| YRI | DEFA1 | 7402649 | 2.0421  | 6.5544  | -1.9894 |
| YRI | DEFA1 | 7407649 | 1.9345  | 6.2183  | -1.9804 |
| YRI | DEFA1 | 7412649 | 0       | 0       | 0       |
| YRI | DEFA1 | 7417649 | 0       | 0       | 0       |
| YRI | DEFA1 | 7422649 | 0.0369  | 0.3361  | -1.2012 |
| YRI | DEFA1 | 7427649 | 0.1648  | 1.3445  | -1.9161 |
| YRI | DEFA1 | 7432649 | 0.1557  | 1.5126  | -2.0205 |
| YRI | DEFA1 | 7437649 | 0.1527  | 1.1764  | -1.8309 |
| YRI | DEFA1 | 7442649 | 0.9824  | 2.1848  | -1.35   |
| YRI | DEFA1 | 7447649 | 1.7621  | 3.0251  | -1.0895 |
| YRI | DEFA1 | 7452649 | 2.5801  | 3.1932  | -0.5056 |
| YRI | DEFA1 | 7457649 | 1.7125  | 2.1848  | -0.5303 |
| YRI | DEFA1 | 7462649 | 1.4165  | 3.3612  | -1.5364 |
| YRI | DEFA1 | 7467649 | 2.887   | 4.3696  | -0.9362 |
| YRI | DEFA1 | 7472649 | 1.7622  | 2.0167  | -0.3043 |
| CEU | DEFA1 | 6501766 | 8.9047  | 11.7688 | -0.7402 |
| CEU | DEFA1 | 6506766 | 13.736  | 16.0329 | -0.4427 |
| CEU | DEFA1 | 6511766 | 17.6553 | 16.0329 | 0.3127  |
| CEU | DEFA1 | 6516766 | 19.9852 | 16.0329 | 0.7618  |
| CEU | DEFA1 | 6521766 | 17.4341 | 17.2268 | 0.0373  |
| CEU | DEFA1 | 6526766 | 13.0872 | 14.1567 | -0.2321 |
| CEU | DEFA1 | 6531766 | 16.4045 | 14.3272 | 0.4457  |
| CEU | DEFA1 | 6536766 | 13.2604 | 15.0095 | -0.359  |
| CEU | DEFA1 | 6541766 | 6.0495  | 14.6684 | -1.8083 |
| CEU | DEFA1 | 6546766 | 6.7207  | 16.7151 | -1.8511 |
| CEU | DEFA1 | 6551766 | 13.8248 | 17.0562 | -0.587  |
| CEU | DEFA1 | 6556766 | 18.471  | 15.3506 | 0.6269  |
| CEU | DEFA1 | 6561766 | 14.6953 | 15.3506 | -0.1317 |
| CEU | DEFA1 | 6566766 | 13.9025 | 14.8389 | -0.1943 |
| CEU | DEFA1 | 6571766 | 14.2834 | 12.7922 | 0.3562  |

## 2\_TajimasD\_data

|     |       |         |         |         |         |
|-----|-------|---------|---------|---------|---------|
| CEU | DEFA1 | 6576766 | 12.5624 | 11.5982 | 0.2526  |
| CEU | DEFA1 | 6581766 | 13.2208 | 10.5749 | 0.756   |
| CEU | DEFA1 | 6586766 | 12.2117 | 9.7221  | 0.7694  |
| CEU | DEFA1 | 6591766 | 11.6026 | 10.7454 | 0.2413  |
| CEU | DEFA1 | 6596766 | 9.1965  | 9.2104  | -0.0045 |
| CEU | DEFA1 | 6601766 | 7.4927  | 7.8459  | -0.1331 |
| CEU | DEFA1 | 6606766 | 9.1315  | 8.8692  | 0.0883  |
| CEU | DEFA1 | 6611766 | 7.5945  | 6.8225  | 0.3303  |
| CEU | DEFA1 | 6616766 | 5.2059  | 6.4814  | -0.5717 |
| CEU | DEFA1 | 6621766 | 7.0752  | 9.2104  | -0.6938 |
| CEU | DEFA1 | 6626766 | 14.2014 | 13.8156 | 0.0857  |
| CEU | DEFA1 | 6631766 | 25.335  | 21.4909 | 0.5591  |
| CEU | DEFA1 | 6636766 | 24.5199 | 20.8086 | 0.5569  |
| CEU | DEFA1 | 6641766 | 18.5094 | 14.8389 | 0.7617  |
| CEU | DEFA1 | 6646766 | 22.9353 | 15.1801 | 1.5748  |
| CEU | DEFA1 | 6651766 | 18.1262 | 11.9394 | 1.5774  |
| CEU | DEFA1 | 6656766 | 13.3886 | 10.7454 | 0.744   |
| CEU | DEFA1 | 6661766 | 15.2608 | 15.5212 | -0.0518 |
| CEU | DEFA1 | 6666766 | 9.7019  | 12.9627 | -0.7693 |
| CEU | DEFA1 | 6671766 | 7.0299  | 10.4043 | -0.9789 |
| CEU | DEFA1 | 6676766 | 11.8052 | 12.4511 | -0.1583 |
| CEU | DEFA1 | 6681766 | 13.0058 | 11.9394 | 0.2719  |
| CEU | DEFA1 | 6686766 | 11.6085 | 11.7688 | -0.0414 |
| CEU | DEFA1 | 6691766 | 14.3348 | 12.6216 | 0.4145  |
| CEU | DEFA1 | 6696766 | 19.4527 | 15.6917 | 0.74    |
| CEU | DEFA1 | 6701766 | 19.3226 | 15.8623 | 0.6738  |
| CEU | DEFA1 | 6706766 | 18.8562 | 14.3272 | 0.9717  |
| CEU | DEFA1 | 6711766 | 33.622  | 23.5376 | 1.3432  |
| CEU | DEFA1 | 6716766 | 36.7333 | 26.0961 | 1.2819  |
| CEU | DEFA1 | 6721766 | 36.5609 | 22.8554 | 1.8783  |
| CEU | DEFA1 | 6726766 | 41.8097 | 26.6077 | 1.7978  |
| CEU | DEFA1 | 6731766 | 38.2432 | 26.0961 | 1.4639  |
| CEU | DEFA1 | 6736766 | 38.9161 | 23.7082 | 2.0116  |
| CEU | DEFA1 | 6741766 | 28.8934 | 23.5376 | 0.7134  |
| CEU | DEFA1 | 6746766 | 15.8211 | 20.1264 | -0.6671 |
| CEU | DEFA1 | 6751766 | 16.9287 | 17.5679 | -0.1129 |
| CEU | DEFA1 | 6756766 | 25.2212 | 22.5142 | 0.3764  |
| CEU | DEFA1 | 6761766 | 46.1954 | 30.7012 | 1.5939  |
| CEU | DEFA1 | 6766766 | 36.102  | 23.0259 | 1.7792  |
| CEU | DEFA1 | 6771766 | 9.1769  | 11.4277 | -0.598  |
| CEU | DEFA1 | 6776766 | 11.7376 | 13.8156 | -0.4615 |
| CEU | DEFA1 | 6781766 | 14.6565 | 14.4978 | 0.0337  |
| CEU | DEFA1 | 6786766 | 20.4157 | 16.5446 | 0.7241  |
| CEU | DEFA1 | 6791766 | 23.6448 | 18.4207 | 0.8815  |
| CEU | DEFA1 | 6796766 | 17.7722 | 14.1567 | 0.7846  |
| CEU | DEFA1 | 6801766 | 14.0326 | 11.4277 | 0.6921  |
| CEU | DEFA1 | 6806766 | 14.6817 | 13.1333 | 0.3608  |
| CEU | DEFA1 | 6811766 | 14.3579 | 12.6216 | 0.4201  |
| CEU | DEFA1 | 6816766 | 12.8306 | 11.5982 | 0.3229  |

## 2\_TajimasD\_data

|     |       |         |         |         |         |
|-----|-------|---------|---------|---------|---------|
| CEU | DEFA1 | 6821766 | 18.9592 | 15.5212 | 0.6835  |
| CEU | DEFA1 | 6826766 | 21.8322 | 15.8623 | 1.1625  |
| CEU | DEFA1 | 6831766 | 10.1373 | 7.1636  | 1.2173  |
| CEU | DEFA1 | 6836766 | 5.1175  | 3.5818  | 1.1575  |
| CEU | DEFA1 | 6841766 | 5.7506  | 4.0935  | 1.1143  |
| CEU | DEFA1 | 6846766 | 2.5501  | 1.7056  | 1.1566  |
| CEU | DEFA1 | 6851766 | 1.232   | 1.0234  | 0.4145  |
| CEU | DEFA1 | 6856766 | 4.4947  | 2.729   | 1.669   |
| CEU | DEFA1 | 6861766 | 4.8458  | 2.729   | 2.0008  |
| CEU | DEFA1 | 6866766 | 1.1723  | 0.6822  | 1.2798  |
| CEU | DEFA1 | 6871766 | 7.5347  | 6.4814  | 0.4721  |
| CEU | DEFA1 | 6876766 | 15.7484 | 15.0095 | 0.1517  |
| CEU | DEFA1 | 6881766 | 13.7193 | 14.6684 | -0.1991 |
| CEU | DEFA1 | 6886766 | 11.7027 | 11.9394 | -0.0603 |
| CEU | DEFA1 | 6891766 | 22.8279 | 16.374  | 1.2192  |
| CEU | DEFA1 | 6896766 | 36.6233 | 22.3437 | 2.0003  |
| CEU | DEFA1 | 6901766 | 37.4935 | 23.5376 | 1.8589  |
| CEU | DEFA1 | 6906766 | 31.4557 | 21.1497 | 1.5224  |
| CEU | DEFA1 | 6911766 | 21.2387 | 15.8623 | 1.0469  |
| CEU | DEFA1 | 6916766 | 9.8577  | 10.7454 | -0.2499 |
| CEU | DEFA1 | 6921766 | 8.8146  | 12.4511 | -0.8912 |
| CEU | DEFA1 | 6926766 | 11.9889 | 15.8623 | -0.7542 |
| CEU | DEFA1 | 6931766 | 13.5723 | 17.7385 | -0.7289 |
| CEU | DEFA1 | 6936766 | 15.8064 | 24.561  | -1.119  |
| CEU | DEFA1 | 6941766 | 22.4886 | 26.2666 | -0.4524 |
| CEU | DEFA1 | 6946766 | 30.9371 | 27.6311 | 0.3769  |
| CEU | DEFA1 | 6951766 | 31.0689 | 29.1662 | 0.2058  |
| CEU | DEFA1 | 6956766 | 27.59   | 25.2432 | 0.2921  |
| CEU | DEFA1 | 6961766 | 26.45   | 22.5142 | 0.5473  |
| CEU | DEFA1 | 6966766 | 18.9194 | 18.7619 | 0.0261  |
| CEU | DEFA1 | 6971766 | 16.5347 | 17.3974 | -0.1538 |
| CEU | DEFA1 | 6976766 | 22.7706 | 19.6147 | 0.5013  |
| CEU | DEFA1 | 6981766 | 30.2554 | 29.3367 | 0.0988  |
| CEU | DEFA1 | 6986766 | 30.4997 | 29.6779 | 0.0874  |
| CEU | DEFA1 | 6991766 | 25.2016 | 20.2969 | 0.7539  |
| CEU | DEFA1 | 6996766 | 30.545  | 25.9255 | 0.5603  |
| CEU | DEFA1 | 7001766 | 30.7454 | 28.8251 | 0.2101  |
| CEU | DEFA1 | 7006766 | 31.0148 | 26.0961 | 0.5928  |
| CEU | DEFA1 | 7011766 | 23.0237 | 18.9324 | 0.6724  |
| CEU | DEFA1 | 7016766 | 7.1169  | 9.0398  | -0.6358 |
| CEU | DEFA1 | 7021766 | 8.966   | 8.5281  | 0.1528  |
| CEU | DEFA1 | 7026766 | 11.3321 | 9.0398  | 0.7579  |
| CEU | DEFA1 | 7031766 | 5.6036  | 9.5515  | -1.2403 |
| CEU | DEFA1 | 7036766 | 1.7796  | 7.5047  | -2.2463 |
| CEU | DEFA1 | 7041766 | 4.5184  | 7.5047  | -1.1717 |
| CEU | DEFA1 | 7046766 | 6.6961  | 7.5047  | -0.3173 |
| CEU | DEFA1 | 7051766 | 6.035   | 7.1636  | -0.462  |
| CEU | DEFA1 | 7056766 | 12.2787 | 10.0632 | 0.663   |
| CEU | DEFA1 | 7061766 | 17.5756 | 11.9394 | 1.437   |

## 2\_TajimasD\_data

|     |       |         |        |         |         |
|-----|-------|---------|--------|---------|---------|
| CEU | DEFA1 | 7066766 | 8.7001 | 7.1636  | 0.629   |
| CEU | DEFA1 | 7071766 | 1.5026 | 1.7056  | -0.278  |
| CEU | DEFA1 | 7076766 | 3.9485 | 3.0701  | 0.7535  |
| CEU | DEFA1 | 7081766 | 7.0882 | 5.2874  | 0.9683  |
| CEU | DEFA1 | 7086766 | 4.6883 | 3.4112  | 1.0031  |
| CEU | DEFA1 | 7091766 | 0.6782 | 0.6822  | -0.0104 |
| CEU | DEFA1 | 7096766 | 0.2041 | 0.5117  | -0.9647 |
| CEU | DEFA1 | 7101766 | 0.1653 | 0.6822  | -1.3498 |
| CEU | DEFA1 | 7106766 | 1.8433 | 2.3879  | -0.5735 |
| CEU | DEFA1 | 7111766 | 1.6881 | 1.8762  | -0.2395 |
| CEU | DEFA1 | 7116766 | 0      | 0       | 0       |
| CEU | DEFA1 | 7121766 | 0      | 0       | 0       |
| CEU | DEFA1 | 7126766 | 2.6009 | 1.5351  | 1.5804  |
| CEU | DEFA1 | 7131766 | 2.6009 | 1.5351  | 1.5804  |
| CEU | DEFA1 | 7136766 | 0      | 0       | 0       |
| CEU | DEFA1 | 7141766 | 0.0392 | 0.1706  | -0.7805 |
| CEU | DEFA1 | 7146766 | 0.8489 | 1.0234  | -0.3467 |
| CEU | DEFA1 | 7151766 | 7.3243 | 15.6917 | -1.6462 |
| CEU | DEFA1 | 7156766 | 7.5384 | 16.0329 | -1.6373 |
| CEU | DEFA1 | 7161766 | 1.8124 | 2.8996  | -0.9778 |
| CEU | DEFA1 | 7166766 | 1.2997 | 3.4112  | -1.6584 |
| CEU | DEFA1 | 7171766 | 1.0606 | 3.5818  | -1.9002 |
| CEU | DEFA1 | 7176766 | 1.6726 | 4.9463  | -1.867  |
| CEU | DEFA1 | 7181766 | 1.8512 | 4.9463  | -1.7651 |
| CEU | DEFA1 | 7186766 | 1.3067 | 5.7991  | -2.2251 |
| CEU | DEFA1 | 7191766 | 2.442  | 8.5281  | -2.1235 |
| CEU | DEFA1 | 7196766 | 3.1004 | 9.2104  | -1.9854 |
| CEU | DEFA1 | 7201766 | 2.37   | 9.2104  | -2.2228 |
| CEU | DEFA1 | 7206766 | 2.3032 | 7.5047  | -2.0408 |
| CEU | DEFA1 | 7211766 | 4.1277 | 9.0398  | -1.6241 |
| CEU | DEFA1 | 7216766 | 5.3322 | 11.4277 | -1.6195 |
| CEU | DEFA1 | 7221766 | 4.7728 | 12.2805 | -1.864  |
| CEU | DEFA1 | 7226766 | 4.8545 | 10.2337 | -1.5847 |
| CEU | DEFA1 | 7231766 | 3.5405 | 5.7991  | -1.1187 |
| CEU | DEFA1 | 7236766 | 2.8994 | 6.6519  | -1.6429 |
| CEU | DEFA1 | 7241766 | 3.8757 | 7.6753  | -1.4605 |
| CEU | DEFA1 | 7246766 | 2.9029 | 6.6519  | -1.6414 |
| CEU | DEFA1 | 7251766 | 3.7454 | 6.9931  | -1.3589 |
| CEU | DEFA1 | 7256766 | 4.0503 | 4.6052  | -0.3369 |
| CEU | DEFA1 | 7261766 | 4.6792 | 5.1169  | -0.2423 |
| CEU | DEFA1 | 7266766 | 4.9443 | 5.6286  | -0.3481 |
| CEU | DEFA1 | 7271766 | 3.1694 | 5.9697  | -1.3515 |
| CEU | DEFA1 | 7276766 | 3.0375 | 7.5047  | -1.7527 |
| CEU | DEFA1 | 7281766 | 1.8266 | 3.5818  | -1.3229 |
| CEU | DEFA1 | 7286766 | 1.5805 | 2.0467  | -0.5547 |
| CEU | DEFA1 | 7291766 | 3.1911 | 2.729   | 0.4368  |
| CEU | DEFA1 | 7296766 | 2.4146 | 2.0467  | 0.4378  |
| CEU | DEFA1 | 7301766 | 0.3774 | 1.3645  | -1.5969 |
| CEU | DEFA1 | 7306766 | 0.9753 | 1.8762  | -1.147  |

## 2\_TajimasD\_data

|     |       |         |         |         |         |
|-----|-------|---------|---------|---------|---------|
| CEU | DEFA1 | 7311766 | 1.2445  | 2.0467  | -0.9545 |
| CEU | DEFA1 | 7316766 | 0.4389  | 1.5351  | -1.6254 |
| CEU | DEFA1 | 7321766 | 0.4644  | 0.6822  | -0.5687 |
| CEU | DEFA1 | 7326766 | 2.2189  | 2.0467  | 0.2049  |
| CEU | DEFA1 | 7331766 | 2.4989  | 3.9229  | -0.9932 |
| CEU | DEFA1 | 7336766 | 1.8464  | 4.0935  | -1.511  |
| CEU | DEFA1 | 7341766 | 1.1624  | 2.2173  | -1.1785 |
| CEU | DEFA1 | 7346766 | 0.6479  | 0.6822  | -0.0896 |
| CEU | DEFA1 | 7351766 | 1.5238  | 2.5584  | -1.0306 |
| CEU | DEFA1 | 7356766 | 0.926   | 2.2173  | -1.4426 |
| CEU | DEFA1 | 7361766 | 0.5955  | 0.8528  | -0.5794 |
| CEU | DEFA1 | 7366766 | 1.699   | 1.7056  | -0.009  |
| CEU | DEFA1 | 7371766 | 2.8806  | 2.3879  | 0.5189  |
| CEU | DEFA1 | 7376766 | 1.7372  | 1.3645  | 0.6029  |
| CEU | DEFA1 | 7381766 | 1.1406  | 0.5117  | 1.9724  |
| CEU | DEFA1 | 7386766 | 1.9126  | 0.8528  | 2.3866  |
| CEU | DEFA1 | 7391766 | 0.9322  | 0.6822  | 0.6528  |
| CEU | DEFA1 | 7396766 | 0.1703  | 0.5117  | -1.0707 |
| CEU | DEFA1 | 7401766 | 1.9163  | 2.5584  | -0.6396 |
| CEU | DEFA1 | 7406766 | 1.9062  | 2.3879  | -0.5073 |
| CEU | DEFA1 | 7411766 | 0       | 0       | 0       |
| CEU | DEFA1 | 7416766 | 0       | 0       | 0       |
| CEU | DEFA1 | 7421766 | 0       | 0       | 0       |
| CEU | DEFA1 | 7426766 | 0.04    | 0.3411  | -1.207  |
| CEU | DEFA1 | 7431766 | 0.12    | 0.6822  | -1.4681 |
| CEU | DEFA1 | 7436766 | 0.0901  | 0.5117  | -1.3222 |
| CEU | DEFA1 | 7441766 | 0.5034  | 0.6822  | -0.4669 |
| CEU | DEFA1 | 7446766 | 1.4587  | 2.2173  | -0.8475 |
| CEU | DEFA1 | 7451766 | 1.6094  | 2.3879  | -0.8198 |
| CEU | DEFA1 | 7456766 | 0.6642  | 1.0234  | -0.7137 |
| CEU | DEFA1 | 7461766 | 0.3496  | 1.7056  | -1.8572 |
| CEU | DEFA1 | 7466766 | 1.5001  | 2.2173  | -0.8012 |
| CEU | DEFA1 | 7471766 | 1.7563  | 1.8762  | -0.1527 |
| CEU | DEFA1 | 7476766 | 0.5857  | 1.0234  | -0.8697 |
| CEU | DEFA1 | 7481766 | 0       | 0       | 0       |
| CEU | DEFA1 | 7486766 | 0       | 0       | 0       |
| CEU | DEFA1 | 7491766 | 0       | 0       | 0       |
| CHB | DEFA1 | 6501766 | 6.425   | 11.3508 | -1.3132 |
| CHB | DEFA1 | 6506766 | 11.4684 | 16.6027 | -0.9544 |
| CHB | DEFA1 | 6511766 | 14.7515 | 22.5322 | -1.078  |
| CHB | DEFA1 | 6516766 | 15.3685 | 22.1934 | -0.9596 |
| CHB | DEFA1 | 6521766 | 15.4436 | 18.6357 | -0.5311 |
| CHB | DEFA1 | 6526766 | 13.704  | 16.4333 | -0.5123 |
| CHB | DEFA1 | 6531766 | 16.9345 | 18.8051 | -0.3086 |
| CHB | DEFA1 | 6536766 | 13.977  | 17.958  | -0.6864 |
| CHB | DEFA1 | 6541766 | 6.8726  | 15.2474 | -1.6886 |
| CHB | DEFA1 | 6546766 | 7.4316  | 15.925  | -1.6429 |
| CHB | DEFA1 | 6551766 | 9.8433  | 15.925  | -1.1764 |
| CHB | DEFA1 | 6556766 | 14.7754 | 18.2968 | -0.5964 |

## 2\_TajimasD\_data

|     |       |         |         |         |         |
|-----|-------|---------|---------|---------|---------|
| CHB | DEFA1 | 6561766 | 16.9119 | 18.9745 | -0.3373 |
| CHB | DEFA1 | 6566766 | 18.5871 | 16.6027 | 0.3689  |
| CHB | DEFA1 | 6571766 | 17.139  | 17.7886 | -0.113  |
| CHB | DEFA1 | 6576766 | 13.1176 | 17.4498 | -0.7678 |
| CHB | DEFA1 | 6581766 | 12.9709 | 15.0779 | -0.4294 |
| CHB | DEFA1 | 6586766 | 11.185  | 12.5367 | -0.3282 |
| CHB | DEFA1 | 6591766 | 11.8561 | 12.8755 | -0.2413 |
| CHB | DEFA1 | 6596766 | 10.6429 | 13.045  | -0.5617 |
| CHB | DEFA1 | 6601766 | 7.7988  | 9.9955  | -0.6596 |
| CHB | DEFA1 | 6606766 | 10.1551 | 12.8755 | -0.644  |
| CHB | DEFA1 | 6611766 | 11.7105 | 17.2803 | -0.9964 |
| CHB | DEFA1 | 6616766 | 9.8176  | 14.5697 | -1.0006 |
| CHB | DEFA1 | 6621766 | 9.588   | 12.3673 | -0.6835 |
| CHB | DEFA1 | 6626766 | 14.6246 | 16.6027 | -0.3677 |
| CHB | DEFA1 | 6631766 | 28.7596 | 22.1934 | 0.9232  |
| CHB | DEFA1 | 6636766 | 35.1557 | 24.904  | 1.2891  |
| CHB | DEFA1 | 6641766 | 27.3573 | 21.8545 | 0.7853  |
| CHB | DEFA1 | 6646766 | 25.7436 | 20.6686 | 0.7643  |
| CHB | DEFA1 | 6651766 | 19.6872 | 18.9745 | 0.1166  |
| CHB | DEFA1 | 6656766 | 15.7569 | 14.7391 | 0.212   |
| CHB | DEFA1 | 6661766 | 22.8717 | 16.4333 | 1.2086  |
| CHB | DEFA1 | 6666766 | 15.4898 | 13.2144 | 0.5256  |
| CHB | DEFA1 | 6671766 | 7.7657  | 9.9955  | -0.6696 |
| CHB | DEFA1 | 6676766 | 12.292  | 11.6896 | 0.1562  |
| CHB | DEFA1 | 6681766 | 14.3321 | 12.7061 | 0.3898  |
| CHB | DEFA1 | 6686766 | 14.6484 | 16.9415 | -0.4181 |
| CHB | DEFA1 | 6691766 | 19.7294 | 22.7016 | -0.4088 |
| CHB | DEFA1 | 6696766 | 25.2642 | 23.7181 | 0.2038  |
| CHB | DEFA1 | 6701766 | 21.0621 | 20.3298 | 0.1121  |
| CHB | DEFA1 | 6706766 | 19.42   | 21.8545 | -0.3474 |
| CHB | DEFA1 | 6711766 | 26.8915 | 25.7511 | 0.1388  |
| CHB | DEFA1 | 6716766 | 25.8919 | 26.4288 | -0.0637 |
| CHB | DEFA1 | 6721766 | 29.6023 | 27.4452 | 0.2468  |
| CHB | DEFA1 | 6726766 | 35.2846 | 28.1229 | 0.8002  |
| CHB | DEFA1 | 6731766 | 32.5648 | 26.937  | 0.6558  |
| CHB | DEFA1 | 6736766 | 32.6212 | 24.0569 | 1.1137  |
| CHB | DEFA1 | 6741766 | 25.379  | 20.6686 | 0.7094  |
| CHB | DEFA1 | 6746766 | 16.3495 | 17.958  | -0.2773 |
| CHB | DEFA1 | 6751766 | 16.7101 | 17.958  | -0.2152 |
| CHB | DEFA1 | 6756766 | 22.8841 | 23.2099 | -0.0439 |
| CHB | DEFA1 | 6761766 | 45.4017 | 28.97   | 1.7837  |
| CHB | DEFA1 | 6766766 | 38.8523 | 22.871  | 2.1825  |
| CHB | DEFA1 | 6771766 | 11.957  | 14.7391 | -0.5794 |
| CHB | DEFA1 | 6776766 | 13.9282 | 15.0779 | -0.2343 |
| CHB | DEFA1 | 6781766 | 16.8229 | 15.7556 | 0.2086  |
| CHB | DEFA1 | 6786766 | 22.1221 | 19.6521 | 0.3905  |
| CHB | DEFA1 | 6791766 | 24.0786 | 18.6357 | 0.9057  |
| CHB | DEFA1 | 6796766 | 15.9838 | 14.4003 | 0.3371  |
| CHB | DEFA1 | 6801766 | 12.5321 | 14.2309 | -0.3658 |



## 2\_TajimasD\_data

|     |       |         |         |         |         |
|-----|-------|---------|---------|---------|---------|
| CHB | DEFA1 | 6806766 | 10.6301 | 11.8591 | -0.3144 |
| CHB | DEFA1 | 6811766 | 9.1041  | 11.012  | -0.5233 |
| CHB | DEFA1 | 6816766 | 10.4417 | 12.0285 | -0.4006 |
| CHB | DEFA1 | 6821766 | 16.3619 | 18.1274 | -0.3017 |
| CHB | DEFA1 | 6826766 | 20.407  | 21.8545 | -0.2066 |
| CHB | DEFA1 | 6831766 | 10.0571 | 10.5037 | -0.128  |
| CHB | DEFA1 | 6836766 | 2.2482  | 3.8965  | -1.1529 |
| CHB | DEFA1 | 6841766 | 3.1437  | 3.8965  | -0.5265 |
| CHB | DEFA1 | 6846766 | 2.2878  | 1.6942  | 0.8146  |
| CHB | DEFA1 | 6851766 | 0.8498  | 1.5247  | -1.0027 |
| CHB | DEFA1 | 6856766 | 2.6271  | 2.7106  | -0.0791 |
| CHB | DEFA1 | 6861766 | 2.999   | 2.5412  | 0.4571  |
| CHB | DEFA1 | 6866766 | 0.9994  | 0.8471  | 0.3434  |
| CHB | DEFA1 | 6871766 | 4.6156  | 4.7436  | -0.0755 |
| CHB | DEFA1 | 6876766 | 12.6811 | 12.8755 | -0.046  |
| CHB | DEFA1 | 6881766 | 13.4385 | 14.5697 | -0.2382 |
| CHB | DEFA1 | 6886766 | 11.9915 | 12.3673 | -0.0924 |
| CHB | DEFA1 | 6891766 | 28.6038 | 18.6357 | 1.6586  |
| CHB | DEFA1 | 6896766 | 41.9539 | 25.7511 | 1.9724  |
| CHB | DEFA1 | 6901766 | 36.4634 | 22.5322 | 1.9302  |
| CHB | DEFA1 | 6906766 | 29.0421 | 17.4498 | 2.0545  |
| CHB | DEFA1 | 6911766 | 17.8252 | 13.7226 | 0.9144  |
| CHB | DEFA1 | 6916766 | 9.7959  | 11.012  | -0.3336 |
| CHB | DEFA1 | 6921766 | 10.2366 | 14.5697 | -0.9123 |
| CHB | DEFA1 | 6926766 | 14.644  | 18.9745 | -0.7082 |
| CHB | DEFA1 | 6931766 | 17.0623 | 18.2968 | -0.2091 |
| CHB | DEFA1 | 6936766 | 17.7853 | 23.7181 | -0.7822 |
| CHB | DEFA1 | 6941766 | 21.0036 | 27.6147 | -0.7519 |
| CHB | DEFA1 | 6946766 | 29.0266 | 31.003  | -0.2008 |
| CHB | DEFA1 | 6951766 | 30.1942 | 32.5277 | -0.2262 |
| CHB | DEFA1 | 6956766 | 21.5566 | 26.4288 | -0.5783 |
| CHB | DEFA1 | 6961766 | 17.8575 | 24.7346 | -0.8705 |
| CHB | DEFA1 | 6966766 | 13.4463 | 22.871  | -1.2871 |
| CHB | DEFA1 | 6971766 | 13.1963 | 21.3463 | -1.1898 |
| CHB | DEFA1 | 6976766 | 17.6155 | 23.5487 | -0.7877 |
| CHB | DEFA1 | 6981766 | 25.4868 | 30.6641 | -0.5317 |
| CHB | DEFA1 | 6986766 | 29.2286 | 29.6476 | -0.0445 |
| CHB | DEFA1 | 6991766 | 24.6391 | 22.3628 | 0.3177  |
| CHB | DEFA1 | 6996766 | 26.5907 | 25.7511 | 0.1022  |
| CHB | DEFA1 | 7001766 | 29.901  | 29.3088 | 0.0636  |
| CHB | DEFA1 | 7006766 | 35.0934 | 29.1394 | 0.6427  |
| CHB | DEFA1 | 7011766 | 28.0509 | 22.871  | 0.7074  |
| CHB | DEFA1 | 7016766 | 10.2081 | 12.5367 | -0.5653 |
| CHB | DEFA1 | 7021766 | 8.554   | 9.6567  | -0.3419 |
| CHB | DEFA1 | 7026766 | 11.8142 | 8.6402  | 1.091   |
| CHB | DEFA1 | 7031766 | 8.5062  | 7.4543  | 0.4141  |
| CHB | DEFA1 | 7036766 | 3.9478  | 5.9295  | -0.9594 |
| CHB | DEFA1 | 7041766 | 5.7476  | 8.1319  | -0.8666 |
| CHB | DEFA1 | 7046766 | 8.1022  | 8.3013  | -0.071  |

## 2\_TajimasD\_data

|     |       |         |         |         |         |
|-----|-------|---------|---------|---------|---------|
| CHB | DEFA1 | 7051766 | 9.5566  | 8.6402  | 0.315   |
| CHB | DEFA1 | 7056766 | 14.582  | 11.3508 | 0.8614  |
| CHB | DEFA1 | 7061766 | 17.3069 | 12.7061 | 1.1029  |
| CHB | DEFA1 | 7066766 | 9.2303  | 8.4708  | 0.2659  |
| CHB | DEFA1 | 7071766 | 2.0642  | 3.0495  | -0.8474 |
| CHB | DEFA1 | 7076766 | 4.4586  | 7.6237  | -1.2205 |
| CHB | DEFA1 | 7081766 | 7.4656  | 8.6402  | -0.4038 |
| CHB | DEFA1 | 7086766 | 4.9456  | 3.5577  | 1.0489  |
| CHB | DEFA1 | 7091766 | 0.8643  | 0.6777  | 0.4878  |
| CHB | DEFA1 | 7096766 | 0.3859  | 0.1694  | 1.2865  |
| CHB | DEFA1 | 7101766 | 0.446   | 0.5082  | -0.1953 |
| CHB | DEFA1 | 7106766 | 2.6326  | 2.7106  | -0.0739 |
| CHB | DEFA1 | 7111766 | 2.1866  | 2.2024  | -0.0177 |
| CHB | DEFA1 | 7116766 | 0       | 0       | 0       |
| CHB | DEFA1 | 7121766 | 0       | 0       | 0       |
| CHB | DEFA1 | 7126766 | 1.2524  | 1.3553  | -0.1668 |
| CHB | DEFA1 | 7131766 | 1.2621  | 1.5247  | -0.3901 |
| CHB | DEFA1 | 7136766 | 0.0097  | 0.1694  | -0.949  |
| CHB | DEFA1 | 7141766 | 0.0659  | 0.1694  | -0.615  |
| CHB | DEFA1 | 7146766 | 0.7006  | 0.6777  | 0.0599  |
| CHB | DEFA1 | 7151766 | 7.1365  | 15.7556 | -1.6844 |
| CHB | DEFA1 | 7156766 | 7.1715  | 16.9415 | -1.7813 |
| CHB | DEFA1 | 7161766 | 0.7756  | 2.8801  | -1.8974 |
| CHB | DEFA1 | 7166766 | 0.4205  | 3.2189  | -2.3007 |
| CHB | DEFA1 | 7171766 | 0.5635  | 3.8965  | -2.3312 |
| CHB | DEFA1 | 7176766 | 0.518   | 4.066   | -2.3925 |
| CHB | DEFA1 | 7181766 | 0.7586  | 3.0495  | -1.9702 |
| CHB | DEFA1 | 7186766 | 0.8707  | 4.2354  | -2.1904 |
| CHB | DEFA1 | 7191766 | 2.0182  | 7.4543  | -2.1398 |
| CHB | DEFA1 | 7196766 | 3.1391  | 8.3013  | -1.8411 |
| CHB | DEFA1 | 7201766 | 3.5368  | 11.3508 | -2.0832 |
| CHB | DEFA1 | 7206766 | 3.5753  | 12.1979 | -2.1483 |
| CHB | DEFA1 | 7211766 | 4.2098  | 9.1484  | -1.6102 |
| CHB | DEFA1 | 7216766 | 4.9966  | 9.9955  | -1.5011 |
| CHB | DEFA1 | 7221766 | 3.9084  | 10.6731 | -1.9106 |
| CHB | DEFA1 | 7226766 | 3.9254  | 6.4378  | -1.1297 |
| CHB | DEFA1 | 7231766 | 2.897   | 2.3718  | 0.5544  |
| CHB | DEFA1 | 7236766 | 2.4702  | 5.7601  | -1.6345 |
| CHB | DEFA1 | 7241766 | 4.0086  | 8.8096  | -1.6209 |
| CHB | DEFA1 | 7246766 | 3.142   | 7.6237  | -1.7283 |
| CHB | DEFA1 | 7251766 | 3.9823  | 7.9625  | -1.4749 |
| CHB | DEFA1 | 7256766 | 3.8083  | 4.913   | -0.6319 |
| CHB | DEFA1 | 7261766 | 4.3063  | 4.7436  | -0.258  |
| CHB | DEFA1 | 7266766 | 5.098   | 5.7601  | -0.3289 |
| CHB | DEFA1 | 7271766 | 2.7915  | 6.6072  | -1.6759 |
| CHB | DEFA1 | 7276766 | 1.8995  | 7.6237  | -2.2074 |
| CHB | DEFA1 | 7281766 | 1.1215  | 4.066   | -1.9856 |
| CHB | DEFA1 | 7286766 | 0.8787  | 2.2024  | -1.4822 |
| CHB | DEFA1 | 7291766 | 2.6849  | 2.5412  | 0.1435  |

## 2\_TajimasD\_data

|     |       |         |         |         |         |
|-----|-------|---------|---------|---------|---------|
| CHB | DEFA1 | 7296766 | 2.1801  | 2.033   | 0.1754  |
| CHB | DEFA1 | 7301766 | 0.1249  | 1.1859  | -1.8939 |
| CHB | DEFA1 | 7306766 | 0.8469  | 2.033   | -1.4144 |
| CHB | DEFA1 | 7311766 | 0.8934  | 2.033   | -1.359  |
| CHB | DEFA1 | 7316766 | 0.1808  | 1.1859  | -1.7941 |
| CHB | DEFA1 | 7321766 | 0.3259  | 0.8471  | -1.1753 |
| CHB | DEFA1 | 7326766 | 1.665   | 1.8636  | -0.2534 |
| CHB | DEFA1 | 7331766 | 2.333   | 4.4048  | -1.3037 |
| CHB | DEFA1 | 7336766 | 1.9446  | 3.7271  | -1.2949 |
| CHB | DEFA1 | 7341766 | 0.999   | 1.0165  | -0.0348 |
| CHB | DEFA1 | 7346766 | 0.6632  | 1.1859  | -0.933  |
| CHB | DEFA1 | 7351766 | 1.3126  | 3.0495  | -1.4937 |
| CHB | DEFA1 | 7356766 | 0.831   | 2.5412  | -1.7078 |
| CHB | DEFA1 | 7361766 | 0.8479  | 1.3553  | -0.8223 |
| CHB | DEFA1 | 7366766 | 1.898   | 2.8801  | -0.8855 |
| CHB | DEFA1 | 7371766 | 2.6208  | 3.3883  | -0.6044 |
| CHB | DEFA1 | 7376766 | 1.3988  | 1.3553  | 0.0705  |
| CHB | DEFA1 | 7381766 | 1.0529  | 0.8471  | 0.4641  |
| CHB | DEFA1 | 7386766 | 1.6688  | 1.6942  | -0.0349 |
| CHB | DEFA1 | 7391766 | 0.7122  | 1.8636  | -1.469  |
| CHB | DEFA1 | 7396766 | 0.106   | 1.1859  | -1.9276 |
| CHB | DEFA1 | 7401766 | 1.9393  | 2.2024  | -0.2946 |
| CHB | DEFA1 | 7406766 | 1.9296  | 2.033   | -0.1233 |
| CHB | DEFA1 | 7411766 | 0       | 0       | 0       |
| CHB | DEFA1 | 7416766 | 0       | 0       | 0       |
| CHB | DEFA1 | 7421766 | 0       | 0       | 0       |
| CHB | DEFA1 | 7426766 | 0.0097  | 0.1694  | -0.949  |
| CHB | DEFA1 | 7431766 | 0.0097  | 0.1694  | -0.949  |
| CHB | DEFA1 | 7436766 | 0.134   | 0.1694  | -0.2104 |
| CHB | DEFA1 | 7441766 | 0.6669  | 1.0165  | -0.6957 |
| CHB | DEFA1 | 7446766 | 1.8987  | 2.2024  | -0.3401 |
| CHB | DEFA1 | 7451766 | 1.9585  | 2.3718  | -0.4363 |
| CHB | DEFA1 | 7456766 | 0.5926  | 1.0165  | -0.8436 |
| CHB | DEFA1 | 7461766 | 0.2178  | 1.3553  | -1.8435 |
| CHB | DEFA1 | 7466766 | 1.0417  | 2.7106  | -1.5814 |
| CHB | DEFA1 | 7471766 | 1.347   | 1.6942  | -0.4765 |
| CHB | DEFA1 | 7476766 | 0.5231  | 0.3388  | 0.7393  |
| CHB | DEFA1 | 7481766 | 0       | 0       | 0       |
| CHB | DEFA1 | 7486766 | 0       | 0       | 0       |
| CHB | DEFA1 | 7491766 | 0       | 0       | 0       |
| YRI | DEFA1 | 6501766 | 10.988  | 20.1675 | -1.4108 |
| YRI | DEFA1 | 6506766 | 15.4367 | 26.0496 | -1.2733 |
| YRI | DEFA1 | 6511766 | 21.5507 | 33.4444 | -1.1185 |
| YRI | DEFA1 | 6516766 | 25.0959 | 31.4276 | -0.6327 |
| YRI | DEFA1 | 6521766 | 22.9545 | 25.3774 | -0.2982 |
| YRI | DEFA1 | 6526766 | 18.3587 | 22.5203 | -0.575  |
| YRI | DEFA1 | 6531766 | 21.7015 | 27.3941 | -0.6504 |
| YRI | DEFA1 | 6536766 | 20.089  | 28.4025 | -0.9169 |
| YRI | DEFA1 | 6541766 | 13.2122 | 23.6968 | -1.3789 |

## 2\_TajimasD\_data

|     |       |         |         |         |         |
|-----|-------|---------|---------|---------|---------|
| YRI | DEFA1 | 6546766 | 13.0577 | 26.3858 | -1.5792 |
| YRI | DEFA1 | 6551766 | 14.5317 | 26.5538 | -1.4157 |
| YRI | DEFA1 | 6556766 | 18.5035 | 23.1926 | -0.6297 |
| YRI | DEFA1 | 6561766 | 22.0661 | 24.0329 | -0.2552 |
| YRI | DEFA1 | 6566766 | 20.9048 | 25.8816 | -0.6008 |
| YRI | DEFA1 | 6571766 | 20.5299 | 29.747  | -0.9718 |
| YRI | DEFA1 | 6576766 | 20.5954 | 31.2596 | -1.0713 |
| YRI | DEFA1 | 6581766 | 18.794  | 27.2261 | -0.9691 |
| YRI | DEFA1 | 6586766 | 13.535  | 21.1758 | -1.1203 |
| YRI | DEFA1 | 6591766 | 13.8667 | 20.5036 | -1.0039 |
| YRI | DEFA1 | 6596766 | 14.2136 | 21.512  | -1.054  |
| YRI | DEFA1 | 6601766 | 11.4079 | 19.9994 | -1.3311 |
| YRI | DEFA1 | 6606766 | 13.6481 | 19.8313 | -0.9658 |
| YRI | DEFA1 | 6611766 | 13.7903 | 19.6633 | -0.9249 |
| YRI | DEFA1 | 6616766 | 12.6475 | 18.991  | -1.033  |
| YRI | DEFA1 | 6621766 | 13.3396 | 20.1675 | -1.0494 |
| YRI | DEFA1 | 6626766 | 19.0719 | 28.2345 | -1.0164 |
| YRI | DEFA1 | 6631766 | 35.0368 | 37.1417 | -0.1786 |
| YRI | DEFA1 | 6636766 | 44.6732 | 34.7889 | 0.8944  |
| YRI | DEFA1 | 6641766 | 34.3911 | 26.7219 | 0.8976  |
| YRI | DEFA1 | 6646766 | 28.0068 | 26.5538 | 0.1711  |
| YRI | DEFA1 | 6651766 | 20.5219 | 23.0245 | -0.3384 |
| YRI | DEFA1 | 6656766 | 14.396  | 20.5036 | -0.9238 |
| YRI | DEFA1 | 6661766 | 24.8476 | 26.2177 | -0.1634 |
| YRI | DEFA1 | 6666766 | 20.6816 | 23.5287 | -0.377  |
| YRI | DEFA1 | 6671766 | 12.6433 | 21.68   | -1.2952 |
| YRI | DEFA1 | 6676766 | 16.9157 | 22.8565 | -0.8091 |
| YRI | DEFA1 | 6681766 | 18.2994 | 22.6884 | -0.602  |
| YRI | DEFA1 | 6686766 | 22.0286 | 26.2177 | -0.4994 |
| YRI | DEFA1 | 6691766 | 30.1861 | 33.1083 | -0.2775 |
| YRI | DEFA1 | 6696766 | 32.6373 | 34.7889 | -0.1947 |
| YRI | DEFA1 | 6701766 | 26.2831 | 31.5957 | -0.5281 |
| YRI | DEFA1 | 6706766 | 27.5403 | 36.1334 | -0.7492 |
| YRI | DEFA1 | 6711766 | 45.8215 | 43.0239 | 0.2055  |
| YRI | DEFA1 | 6716766 | 51.5717 | 42.1836 | 0.7033  |
| YRI | DEFA1 | 6721766 | 46.7506 | 41.0072 | 0.4423  |
| YRI | DEFA1 | 6726766 | 41.4846 | 42.5197 | -0.0769 |
| YRI | DEFA1 | 6731766 | 32.7927 | 40.6711 | -0.6117 |
| YRI | DEFA1 | 6736766 | 34.3429 | 36.9737 | -0.2243 |
| YRI | DEFA1 | 6741766 | 31.0376 | 33.6124 | -0.241  |
| YRI | DEFA1 | 6746766 | 21.7786 | 33.1083 | -1.076  |
| YRI | DEFA1 | 6751766 | 20.6488 | 30.5873 | -1.0198 |
| YRI | DEFA1 | 6756766 | 32.9123 | 33.1083 | -0.0186 |
| YRI | DEFA1 | 6761766 | 52.9746 | 41.8475 | 0.8401  |
| YRI | DEFA1 | 6766766 | 40.0197 | 35.2931 | 0.4217  |
| YRI | DEFA1 | 6771766 | 15.8247 | 24.5371 | -1.1077 |
| YRI | DEFA1 | 6776766 | 16.5618 | 25.0413 | -1.0571 |
| YRI | DEFA1 | 6781766 | 18.4352 | 25.7135 | -0.8843 |
| YRI | DEFA1 | 6786766 | 21.4649 | 25.8816 | -0.5332 |

## 2\_TajimasD\_data

|     |       |         |         |         |         |
|-----|-------|---------|---------|---------|---------|
| YRI | DEFA1 | 6791766 | 22.8998 | 27.058  | -0.4808 |
| YRI | DEFA1 | 6796766 | 16.8463 | 26.7219 | -1.1558 |
| YRI | DEFA1 | 6801766 | 13.3183 | 24.369  | -1.4144 |
| YRI | DEFA1 | 6806766 | 14.0523 | 22.6884 | -1.1846 |
| YRI | DEFA1 | 6811766 | 15.0406 | 24.201  | -1.1804 |
| YRI | DEFA1 | 6816766 | 16.8337 | 24.0329 | -0.934  |
| YRI | DEFA1 | 6821766 | 22.3846 | 27.7303 | -0.6035 |
| YRI | DEFA1 | 6826766 | 24.3358 | 27.8983 | -0.3998 |
| YRI | DEFA1 | 6831766 | 11.5238 | 12.2685 | -0.1839 |
| YRI | DEFA1 | 6836766 | 5.1313  | 5.8822  | -0.3649 |
| YRI | DEFA1 | 6841766 | 6.3125  | 6.5544  | -0.1066 |
| YRI | DEFA1 | 6846766 | 3.4277  | 3.0251  | 0.3473  |
| YRI | DEFA1 | 6851766 | 1.8816  | 2.1848  | -0.3404 |
| YRI | DEFA1 | 6856766 | 3.9575  | 5.2099  | -0.6779 |
| YRI | DEFA1 | 6861766 | 4.7219  | 5.5461  | -0.4221 |
| YRI | DEFA1 | 6866766 | 1.7998  | 1.6806  | 0.164   |
| YRI | DEFA1 | 6871766 | 6.1326  | 8.235   | -0.7528 |
| YRI | DEFA1 | 6876766 | 17.2471 | 23.8648 | -0.8644 |
| YRI | DEFA1 | 6881766 | 17.8149 | 27.3941 | -1.0944 |
| YRI | DEFA1 | 6886766 | 13.6625 | 23.1926 | -1.2797 |
| YRI | DEFA1 | 6891766 | 28.265  | 30.4193 | -0.2222 |
| YRI | DEFA1 | 6896766 | 42.9058 | 36.9737 | 0.5057  |
| YRI | DEFA1 | 6901766 | 39.2234 | 33.7805 | 0.5069  |
| YRI | DEFA1 | 6906766 | 31.0789 | 30.5873 | 0.0504  |
| YRI | DEFA1 | 6911766 | 19.2356 | 24.5371 | -0.6741 |
| YRI | DEFA1 | 6916766 | 10.5634 | 19.3272 | -1.4033 |
| YRI | DEFA1 | 6921766 | 16.4294 | 27.3941 | -1.2527 |
| YRI | DEFA1 | 6926766 | 25.1268 | 34.9569 | -0.8853 |
| YRI | DEFA1 | 6931766 | 23.8214 | 34.1166 | -0.9495 |
| YRI | DEFA1 | 6936766 | 22.163  | 35.6292 | -1.1904 |
| YRI | DEFA1 | 6941766 | 22.4908 | 35.9653 | -1.1802 |
| YRI | DEFA1 | 6946766 | 30.6481 | 40.8391 | -0.7881 |
| YRI | DEFA1 | 6951766 | 35.1211 | 43.3601 | -0.6007 |
| YRI | DEFA1 | 6956766 | 26.7518 | 36.9737 | -0.8714 |
| YRI | DEFA1 | 6961766 | 22.6198 | 31.5957 | -0.8923 |
| YRI | DEFA1 | 6966766 | 18.028  | 28.9067 | -1.1795 |
| YRI | DEFA1 | 6971766 | 17.462  | 32.2679 | -1.4419 |
| YRI | DEFA1 | 6976766 | 24.1084 | 32.2679 | -0.7947 |
| YRI | DEFA1 | 6981766 | 30.0002 | 38.8224 | -0.717  |
| YRI | DEFA1 | 6986766 | 27.6224 | 39.9988 | -0.9768 |
| YRI | DEFA1 | 6991766 | 22.4547 | 30.2512 | -0.8087 |
| YRI | DEFA1 | 6996766 | 27.3478 | 35.125  | -0.6971 |
| YRI | DEFA1 | 7001766 | 36.0627 | 39.6627 | -0.2865 |
| YRI | DEFA1 | 7006766 | 41.5664 | 39.3266 | 0.1797  |
| YRI | DEFA1 | 7011766 | 30.641  | 28.9067 | 0.188   |
| YRI | DEFA1 | 7016766 | 14.1804 | 16.134  | -0.372  |
| YRI | DEFA1 | 7021766 | 13.1128 | 14.4534 | -0.2835 |
| YRI | DEFA1 | 7026766 | 13.5294 | 13.7811 | -0.0557 |
| YRI | DEFA1 | 7031766 | 11.4194 | 13.445  | -0.4587 |

## 2\_TajimasD\_data

|     |       |         |         |         |         |
|-----|-------|---------|---------|---------|---------|
| YRI | DEFA1 | 7036766 | 7.7202  | 9.2434  | -0.4902 |
| YRI | DEFA1 | 7041766 | 8.9617  | 11.0921 | -0.5784 |
| YRI | DEFA1 | 7046766 | 11.6805 | 12.6047 | -0.2225 |
| YRI | DEFA1 | 7051766 | 13.5603 | 14.9575 | -0.2859 |
| YRI | DEFA1 | 7056766 | 20.6814 | 20.1675 | 0.079   |
| YRI | DEFA1 | 7061766 | 22.3043 | 18.3188 | 0.6719  |
| YRI | DEFA1 | 7066766 | 11.0479 | 9.5795  | 0.4572  |
| YRI | DEFA1 | 7071766 | 2.5808  | 3.6974  | -0.8139 |
| YRI | DEFA1 | 7076766 | 4.3288  | 7.2267  | -1.1694 |
| YRI | DEFA1 | 7081766 | 6.4872  | 7.7309  | -0.4719 |
| YRI | DEFA1 | 7086766 | 4.4656  | 4.3696  | 0.0606  |
| YRI | DEFA1 | 7091766 | 0.9667  | 1.5126  | -0.8129 |
| YRI | DEFA1 | 7096766 | 0.2903  | 1.0084  | -1.4317 |
| YRI | DEFA1 | 7101766 | 0.764   | 2.3529  | -1.6819 |
| YRI | DEFA1 | 7106766 | 2.2594  | 5.8822  | -1.7604 |
| YRI | DEFA1 | 7111766 | 1.6968  | 4.3696  | -1.6877 |
| YRI | DEFA1 | 7116766 | 0       | 0       | 0       |
| YRI | DEFA1 | 7121766 | 0       | 0       | 0       |
| YRI | DEFA1 | 7126766 | 1.6231  | 1.5126  | 0.1645  |
| YRI | DEFA1 | 7131766 | 1.6783  | 1.8487  | -0.218  |
| YRI | DEFA1 | 7136766 | 0.0552  | 0.3361  | -1.1277 |
| YRI | DEFA1 | 7141766 | 0.1681  | 0.1681  | 0       |
| YRI | DEFA1 | 7146766 | 1.6615  | 1.0084  | 1.3021  |
| YRI | DEFA1 | 7151766 | 11.175  | 18.823  | -1.2561 |
| YRI | DEFA1 | 7156766 | 10.8409 | 20.8397 | -1.4889 |
| YRI | DEFA1 | 7161766 | 3.4242  | 5.0419  | -0.9013 |
| YRI | DEFA1 | 7166766 | 5.0215  | 6.5544  | -0.6758 |
| YRI | DEFA1 | 7171766 | 4.1957  | 7.3947  | -1.2641 |
| YRI | DEFA1 | 7176766 | 3.6383  | 6.2183  | -1.1927 |
| YRI | DEFA1 | 7181766 | 2.6581  | 4.7057  | -1.2121 |
| YRI | DEFA1 | 7186766 | 4.1205  | 8.4031  | -1.5052 |
| YRI | DEFA1 | 7191766 | 7.1548  | 11.5963 | -1.1566 |
| YRI | DEFA1 | 7196766 | 10.6021 | 11.2602 | -0.1762 |
| YRI | DEFA1 | 7201766 | 13.0225 | 15.9659 | -0.5661 |
| YRI | DEFA1 | 7206766 | 9.9641  | 16.9743 | -1.2715 |
| YRI | DEFA1 | 7211766 | 8.8005  | 15.2937 | -1.301  |
| YRI | DEFA1 | 7216766 | 8.2451  | 15.6298 | -1.4493 |
| YRI | DEFA1 | 7221766 | 7.7904  | 17.4785 | -1.7086 |
| YRI | DEFA1 | 7226766 | 7.7811  | 14.4534 | -1.4108 |
| YRI | DEFA1 | 7231766 | 4.1423  | 6.7225  | -1.1118 |
| YRI | DEFA1 | 7236766 | 4.1936  | 8.4031  | -1.4795 |
| YRI | DEFA1 | 7241766 | 7.0628  | 14.1172 | -1.5254 |
| YRI | DEFA1 | 7246766 | 5.2253  | 13.2769 | -1.8453 |
| YRI | DEFA1 | 7251766 | 5.8043  | 13.2769 | -1.7126 |
| YRI | DEFA1 | 7256766 | 5.5512  | 9.0754  | -1.1536 |
| YRI | DEFA1 | 7261766 | 4.718   | 5.8822  | -0.5657 |
| YRI | DEFA1 | 7266766 | 4.8547  | 7.0586  | -0.9086 |
| YRI | DEFA1 | 7271766 | 3.6422  | 10.756  | -1.9879 |
| YRI | DEFA1 | 7276766 | 3.5357  | 11.7644 | -2.114  |

## 2\_TajimasD\_data

|     |         |          |         |        |         |
|-----|---------|----------|---------|--------|---------|
| YRI | DEFA1   | 7281766  | 2.7098  | 7.0586 | -1.7928 |
| YRI | DEFA1   | 7286766  | 2.3109  | 4.7057 | -1.4176 |
| YRI | DEFA1   | 7291766  | 2.8648  | 3.6974 | -0.6069 |
| YRI | DEFA1   | 7296766  | 2.5311  | 5.2099 | -1.45   |
| YRI | DEFA1   | 7301766  | 1.1443  | 6.0502 | -2.3244 |
| YRI | DEFA1   | 7306766  | 1.5523  | 6.3864 | -2.1818 |
| YRI | DEFA1   | 7311766  | 1.5904  | 4.7057 | -1.8441 |
| YRI | DEFA1   | 7316766  | 0.4846  | 2.0167 | -1.8319 |
| YRI | DEFA1   | 7321766  | 0.651   | 1.1764 | -0.9397 |
| YRI | DEFA1   | 7326766  | 2.533   | 3.1932 | -0.5445 |
| YRI | DEFA1   | 7331766  | 3.6308  | 8.067  | -1.6188 |
| YRI | DEFA1   | 7336766  | 2.6132  | 7.7309 | -1.9418 |
| YRI | DEFA1   | 7341766  | 1.0648  | 3.1932 | -1.7553 |
| YRI | DEFA1   | 7346766  | 1.035   | 1.8487 | -1.0408 |
| YRI | DEFA1   | 7351766  | 2.9094  | 4.0335 | -0.7606 |
| YRI | DEFA1   | 7356766  | 2.456   | 3.8654 | -0.9891 |
| YRI | DEFA1   | 7361766  | 1.213   | 1.6806 | -0.6433 |
| YRI | DEFA1   | 7366766  | 2.6877  | 3.1932 | -0.4169 |
| YRI | DEFA1   | 7371766  | 4.355   | 4.0335 | 0.2175  |
| YRI | DEFA1   | 7376766  | 2.4528  | 1.8487 | 0.7727  |
| YRI | DEFA1   | 7381766  | 0.6447  | 1.0084 | -0.7251 |
| YRI | DEFA1   | 7386766  | 1.3384  | 2.1848 | -0.9503 |
| YRI | DEFA1   | 7391766  | 0.9043  | 2.8571 | -1.766  |
| YRI | DEFA1   | 7396766  | 0.2997  | 1.8487 | -1.9813 |
| YRI | DEFA1   | 7401766  | 2.0421  | 6.5544 | -1.9894 |
| YRI | DEFA1   | 7406766  | 1.953   | 6.3864 | -2.0009 |
| YRI | DEFA1   | 7411766  | 0       | 0      | 0       |
| YRI | DEFA1   | 7416766  | 0       | 0      | 0       |
| YRI | DEFA1   | 7421766  | 0       | 0      | 0       |
| YRI | DEFA1   | 7426766  | 0.0914  | 0.6722 | -1.5205 |
| YRI | DEFA1   | 7431766  | 0.1833  | 1.6806 | -2.0598 |
| YRI | DEFA1   | 7436766  | 0.2261  | 1.8487 | -2.0755 |
| YRI | DEFA1   | 7441766  | 0.808   | 2.0167 | -1.4452 |
| YRI | DEFA1   | 7446766  | 1.7621  | 3.0251 | -1.0895 |
| YRI | DEFA1   | 7451766  | 2.7455  | 3.3612 | -0.4864 |
| YRI | DEFA1   | 7456766  | 1.7125  | 2.1848 | -0.5303 |
| YRI | DEFA1   | 7461766  | 1.4165  | 3.3612 | -1.5364 |
| YRI | DEFA1   | 7466766  | 2.7501  | 4.2016 | -0.9482 |
| YRI | DEFA1   | 7471766  | 1.7805  | 2.1848 | -0.4539 |
| YRI | DEFA1   | 7476766  | 0.3916  | 0.6722 | -0.7346 |
| YRI | DEFA1   | 7481766  | 0       | 0      | 0       |
| YRI | DEFA1   | 7486766  | 0       | 0      | 0       |
| YRI | DEFA1   | 7491766  | 0       | 0      | 0       |
| CEU | DEFB130 | 11569389 | 4.496   | 6.6519 | -0.9439 |
| CEU | DEFB130 | 11574389 | 3.9458  | 6.8225 | -1.2309 |
| CEU | DEFB130 | 11579389 | 6.7642  | 8.8692 | -0.7083 |
| CEU | DEFB130 | 11584389 | 10.2406 | 9.7221 | 0.1602  |
| CEU | DEFB130 | 11589389 | 10.7904 | 9.0398 | 0.5788  |
| CEU | DEFB130 | 11594389 | 10.3581 | 8.5281 | 0.6385  |

## 2\_TajimasD\_data

|     |         |          |         |         |         |
|-----|---------|----------|---------|---------|---------|
| CEU | DEFB130 | 11599389 | 10.4705 | 8.8692  | 0.5388  |
| CEU | DEFB130 | 11604389 | 14.1691 | 10.2337 | 1.1594  |
| CEU | DEFB130 | 11609389 | 22.335  | 14.1567 | 1.7748  |
| CEU | DEFB130 | 11614389 | 24.7462 | 16.7151 | 1.4875  |
| CEU | DEFB130 | 11619389 | 20.1043 | 15.3506 | 0.9551  |
| CEU | DEFB130 | 11624389 | 20.8586 | 15.3506 | 1.1066  |
| CEU | DEFB130 | 11629389 | 20.1111 | 15.6917 | 0.8695  |
| CEU | DEFB130 | 11634389 | 13.5336 | 15.0095 | -0.3029 |
| CEU | DEFB130 | 11639389 | 11.6649 | 14.1567 | -0.5407 |
| CEU | DEFB130 | 11644389 | 19.5271 | 15.8623 | 0.7136  |
| CEU | DEFB130 | 11649389 | 26.4897 | 22.5142 | 0.5528  |
| CEU | DEFB130 | 11654389 | 24.5346 | 23.8787 | 0.0862  |
| CEU | DEFB130 | 11659389 | 19.6316 | 19.103  | 0.0861  |
| CEU | DEFB130 | 11664389 | 20.4554 | 19.103  | 0.2204  |
| CEU | DEFB130 | 11669389 | 21.1022 | 20.1264 | 0.1512  |
| CEU | DEFB130 | 11674389 | 21.1274 | 19.2736 | 0.2995  |
| CEU | DEFB130 | 11679389 | 20.7046 | 19.4441 | 0.2019  |
| CEU | DEFB130 | 11684389 | 19.5426 | 19.7852 | -0.0382 |
| CEU | DEFB130 | 11689389 | 20.0198 | 18.0796 | 0.3333  |
| CEU | DEFB130 | 11694389 | 15.5743 | 16.0329 | -0.0884 |
| CEU | DEFB130 | 11699389 | 20.5939 | 19.6147 | 0.1555  |
| CEU | DEFB130 | 11704389 | 28.6578 | 22.8554 | 0.7952  |
| CEU | DEFB130 | 11709389 | 23.8287 | 18.7619 | 0.84    |
| CEU | DEFB130 | 11714389 | 12.1323 | 11.7688 | 0.0939  |
| CEU | DEFB130 | 11719389 | 8.2245  | 10.4043 | -0.6323 |
| CEU | DEFB130 | 11724389 | 8.9751  | 11.5982 | -0.6873 |
| CEU | DEFB130 | 11729389 | 10.8458 | 12.9627 | -0.4994 |
| CEU | DEFB130 | 11734389 | 18.1093 | 15.5212 | 0.5145  |
| CEU | DEFB130 | 11739389 | 19.6731 | 14.4978 | 1.098   |
| CEU | DEFB130 | 11744389 | 21.6909 | 16.374  | 1.0044  |
| CEU | DEFB130 | 11749389 | 23.9679 | 15.6917 | 1.6283  |
| CEU | DEFB130 | 11754389 | 17.2061 | 10.7454 | 1.8185  |
| CEU | DEFB130 | 11759389 | 8.4168  | 9.5515  | -0.3565 |
| CEU | DEFB130 | 11764389 | 24.222  | 17.0562 | 1.3018  |
| CEU | DEFB130 | 11769389 | 43.1055 | 24.0493 | 2.4859  |
| CEU | DEFB130 | 11774389 | 32.9464 | 24.0493 | 1.1606  |
| CEU | DEFB130 | 11779389 | 43.6205 | 29.8484 | 1.4563  |
| CEU | DEFB130 | 11784389 | 64.1099 | 33.9419 | 2.8137  |
| CEU | DEFB130 | 11789389 | 74.2839 | 37.6943 | 3.0797  |
| CEU | DEFB130 | 11794389 | 65.2346 | 34.1125 | 2.8885  |
| CEU | DEFB130 | 11799389 | 31.4016 | 20.8086 | 1.5895  |
| CEU | DEFB130 | 11804389 | 16.677  | 15.0095 | 0.3423  |
| CEU | DEFB130 | 11809389 | 17.5308 | 13.645  | 0.8732  |
| CEU | DEFB130 | 11814389 | 21.8076 | 14.6684 | 1.4978  |
| CEU | DEFB130 | 11819389 | 21.775  | 13.4744 | 1.8877  |
| CEU | DEFB130 | 11824389 | 17.3327 | 12.1099 | 1.3139  |
| CEU | DEFB130 | 11829389 | 16.3791 | 12.2805 | 1.0176  |
| CEU | DEFB130 | 11834389 | 14.4879 | 11.5982 | 0.7571  |
| CEU | DEFB130 | 11839389 | 9.4735  | 10.7454 | -0.358  |



## 2\_TajimasD\_data

|     |         |          |         |         |         |
|-----|---------|----------|---------|---------|---------|
| CEU | DEFB130 | 11844389 | 7.9878  | 8.5281  | -0.1885 |
| CEU | DEFB130 | 11849389 | 11.7442 | 8.8692  | 0.9674  |
| CEU | DEFB130 | 11854389 | 13.1785 | 10.916  | 0.6275  |
| CEU | DEFB130 | 11859389 | 11.2329 | 11.5982 | -0.0957 |
| CEU | DEFB130 | 11864389 | 9.0635  | 11.9394 | -0.7332 |
| CEU | DEFB130 | 11869389 | 20.1284 | 19.103  | 0.1671  |
| CEU | DEFB130 | 11874389 | 21.7817 | 20.2969 | 0.2282  |
| CEU | DEFB130 | 11879389 | 12.8231 | 16.2034 | -0.645  |
| CEU | DEFB130 | 11884389 | 13.8569 | 17.7385 | -0.6791 |
| CEU | DEFB130 | 11889389 | 22.4224 | 18.4207 | 0.6752  |
| CEU | DEFB130 | 11894389 | 28.0305 | 16.2034 | 2.2567  |
| CEU | DEFB130 | 11899389 | 12.4545 | 6.8225  | 2.4099  |
| CEU | DEFB130 | 11904389 | 2.1492  | 1.8762  | 0.3476  |
| CEU | DEFB130 | 11909389 | 3.5331  | 2.5584  | 0.971   |
| CEU | DEFB130 | 11914389 | 2.7458  | 2.0467  | 0.8319  |
| CEU | DEFB130 | 11919389 | 2.1664  | 1.7056  | 0.6311  |
| CEU | DEFB130 | 11924389 | 1.267   | 0.8528  | 0.9328  |
| CEU | DEFB130 | 11929389 | 1.7518  | 1.1939  | 0.9942  |
| CEU | DEFB130 | 11934389 | 2.4566  | 1.5351  | 1.3664  |
| CEU | DEFB130 | 11939389 | 1.1674  | 0.8528  | 0.7085  |
| CEU | DEFB130 | 11944389 | 2.7899  | 2.0467  | 0.8843  |
| CEU | DEFB130 | 11949389 | 6.1453  | 3.7524  | 1.7336  |
| CEU | DEFB130 | 11954389 | 3.981   | 2.2173  | 1.9704  |
| CEU | DEFB130 | 11959389 | 1.0196  | 0.8528  | 0.3756  |
| CEU | DEFB130 | 11964389 | 0.5026  | 1.3645  | -1.3944 |
| CEU | DEFB130 | 11969389 | 1.5861  | 1.8762  | -0.3693 |
| CEU | DEFB130 | 11974389 | 9.6054  | 5.9697  | 1.7546  |
| CEU | DEFB130 | 11979389 | 12.6685 | 9.3809  | 1.0503  |
| CEU | DEFB130 | 11984389 | 11.2707 | 12.4511 | -0.2893 |
| CEU | DEFB130 | 11989389 | 18.5784 | 20.6381 | -0.3115 |
| CEU | DEFB130 | 11994389 | 27.4574 | 24.7316 | 0.3461  |
| CEU | DEFB130 | 11999389 | 25.4329 | 19.4441 | 0.9593  |
| CEU | DEFB130 | 12004389 | 13.9796 | 12.6216 | 0.3285  |
| CEU | DEFB130 | 12009389 | 5.765   | 6.6519  | -0.3883 |
| CEU | DEFB130 | 12014389 | 2.2195  | 2.3879  | -0.1773 |
| CEU | DEFB130 | 12019389 | 0.872   | 1.5351  | -0.9832 |
| CEU | DEFB130 | 12024389 | 0.342   | 1.1939  | -1.5181 |
| CEU | DEFB130 | 12029389 | 3.8075  | 4.2641  | -0.2964 |
| CEU | DEFB130 | 12034389 | 10.7085 | 10.7454 | -0.0104 |
| CEU | DEFB130 | 12039389 | 9.3148  | 9.5515  | -0.0744 |
| CEU | DEFB130 | 12044389 | 2.5955  | 3.7524  | -0.8381 |
| CEU | DEFB130 | 12049389 | 1.5358  | 2.729   | -1.1278 |
| CEU | DEFB130 | 12054389 | 2.6514  | 2.8996  | -0.2232 |
| CEU | DEFB130 | 12059389 | 2.9569  | 2.5584  | 0.397   |
| CEU | DEFB130 | 12064389 | 2.4807  | 2.3879  | 0.0977  |
| CEU | DEFB130 | 12069389 | 3.4768  | 3.4112  | 0.0515  |
| CEU | DEFB130 | 12074389 | 4.3729  | 3.4112  | 0.7553  |
| CEU | DEFB130 | 12079389 | 3.1754  | 2.8996  | 0.248   |
| CEU | DEFB130 | 12084389 | 8.3624  | 9.7221  | -0.4202 |

## 2\_TajimasD\_data

|     |         |          |         |         |         |
|-----|---------|----------|---------|---------|---------|
| CEU | DEFB130 | 12089389 | 7.2645  | 9.5515  | -0.7185 |
| CEU | DEFB130 | 12094389 | 0.2797  | 1.3645  | -1.755  |
| CEU | DEFB130 | 12099389 | 0       | 0       | 0       |
| CEU | DEFB130 | 12104389 | 0       | 0       | 0       |
| CEU | DEFB130 | 12109389 | 0       | 0       | 0       |
| CEU | DEFB130 | 12114389 | 0       | 0       | 0       |
| CEU | DEFB130 | 12119389 | 0       | 0       | 0       |
| CEU | DEFB130 | 12124389 | 0       | 0       | 0       |
| CEU | DEFB130 | 12129389 | 0       | 0       | 0       |
| CEU | DEFB130 | 12134389 | 0       | 0       | 0       |
| CEU | DEFB130 | 12139389 | 3.059   | 1.5351  | 2.2596  |
| CEU | DEFB130 | 12144389 | 8.2109  | 4.6052  | 2.1892  |
| CEU | DEFB130 | 12149389 | 5.3826  | 3.9229  | 1.0181  |
| CEU | DEFB130 | 12154389 | 0.7986  | 2.3879  | -1.6737 |
| CEU | DEFB130 | 12159389 | 0.5679  | 1.5351  | -1.4342 |
| CEU | DEFB130 | 12164389 | 4.4679  | 1.8762  | 3.2997  |
| CEU | DEFB130 | 12169389 | 5.3816  | 2.3879  | 3.1527  |
| CEU | DEFB130 | 12174389 | 4.7535  | 4.2641  | 0.3177  |
| CEU | DEFB130 | 12179389 | 13.2933 | 9.8926  | 1.034   |
| CEU | DEFB130 | 12184389 | 16.0138 | 10.4043 | 1.6273  |
| CEU | DEFB130 | 12189389 | 8.6479  | 6.4814  | 0.9711  |
| CEU | DEFB130 | 12194389 | 3.5156  | 3.7524  | -0.1716 |
| CEU | DEFB130 | 12199389 | 3.8905  | 3.0701  | 0.7037  |
| CEU | DEFB130 | 12204389 | 2.9287  | 2.3879  | 0.5695  |
| CEU | DEFB130 | 12209389 | 0.8231  | 1.3645  | -0.8759 |
| CEU | DEFB130 | 12214389 | 2.4898  | 3.0701  | -0.4978 |
| CEU | DEFB130 | 12219389 | 2.7972  | 3.5818  | -0.5914 |
| CEU | DEFB130 | 12224389 | 3.9126  | 3.7524  | 0.1161  |
| CEU | DEFB130 | 12229389 | 12.4997 | 9.3809  | 0.9963  |
| CEU | DEFB130 | 12234389 | 24.8153 | 19.6147 | 0.8261  |
| CEU | DEFB130 | 12239389 | 26.476  | 24.0493 | 0.3166  |
| CEU | DEFB130 | 12244389 | 19.899  | 18.7619 | 0.1885  |
| CEU | DEFB130 | 12249389 | 10.2503 | 9.0398  | 0.4002  |
| CEU | DEFB130 | 12254389 | 1.9705  | 2.3879  | -0.4396 |
| CEU | DEFB130 | 12259389 | 2.0019  | 2.5584  | -0.5544 |
| CEU | DEFB130 | 12264389 | 1.335   | 2.0467  | -0.8468 |
| CEU | DEFB130 | 12269389 | 1.1831  | 2.8996  | -1.5437 |
| CEU | DEFB130 | 12274389 | 6.8343  | 9.2104  | -0.7721 |
| CEU | DEFB130 | 12279389 | 7.852   | 9.2104  | -0.4414 |
| CEU | DEFB130 | 12284389 | 7.2552  | 7.5047  | -0.0979 |
| CEU | DEFB130 | 12289389 | 7.7706  | 7.3342  | 0.1749  |
| CEU | DEFB130 | 12294389 | 4.5951  | 3.5818  | 0.7637  |
| CEU | DEFB130 | 12299389 | 3.5055  | 2.729   | 0.734   |
| CEU | DEFB130 | 12304389 | 5.4954  | 3.9229  | 1.0968  |
| CEU | DEFB130 | 12309389 | 5.3076  | 4.2641  | 0.6774  |
| CEU | DEFB130 | 12314389 | 1.792   | 2.8996  | -0.9961 |
| CEU | DEFB130 | 12319389 | 0.6999  | 2.2173  | -1.6952 |
| CEU | DEFB130 | 12324389 | 0.3463  | 1.3645  | -1.6472 |
| CEU | DEFB130 | 12329389 | 0.6446  | 0.8528  | -0.4689 |

## 2\_TajimasD\_data

|     |         |          |         |         |         |
|-----|---------|----------|---------|---------|---------|
| CEU | DEFB130 | 12334389 | 1.3783  | 1.3645  | 0.0223  |
| CEU | DEFB130 | 12339389 | 6.9297  | 4.6052  | 1.4113  |
| CEU | DEFB130 | 12344389 | 7.1637  | 5.6286  | 0.7808  |
| CEU | DEFB130 | 12349389 | 1.7592  | 2.8996  | -1.0256 |
| CEU | DEFB130 | 12354389 | 0.9118  | 1.5351  | -0.9242 |
| CEU | DEFB130 | 12359389 | 0.7681  | 1.7056  | -1.284  |
| CEU | DEFB130 | 12364389 | 0.6679  | 1.8762  | -1.5384 |
| CEU | DEFB130 | 12369389 | 0.4783  | 2.0467  | -1.8662 |
| CEU | DEFB130 | 12374389 | 2.3315  | 2.8996  | -0.5109 |
| CEU | DEFB130 | 12379389 | 3.8479  | 3.7524  | 0.0692  |
| CEU | DEFB130 | 12384389 | 2.6671  | 3.4112  | -0.5844 |
| CEU | DEFB130 | 12389389 | 1.3054  | 1.3645  | -0.0956 |
| CEU | DEFB130 | 12394389 | 6.0092  | 4.0935  | 1.2882  |
| CEU | DEFB130 | 12399389 | 11.3886 | 7.5047  | 1.5239  |
| CEU | DEFB130 | 12404389 | 10.0748 | 5.9697  | 1.9812  |
| CEU | DEFB130 | 12409389 | 6.012   | 3.9229  | 1.4571  |
| CEU | DEFB130 | 12414389 | 6.6056  | 4.4346  | 1.3622  |
| CEU | DEFB130 | 12419389 | 8.8705  | 5.2874  | 1.9266  |
| CEU | DEFB130 | 12424389 | 8.1748  | 6.6519  | 0.6668  |
| CEU | DEFB130 | 12429389 | 8.8602  | 7.3342  | 0.6114  |
| CEU | DEFB130 | 12434389 | 8.6289  | 6.9931  | 0.6844  |
| CEU | DEFB130 | 12439389 | 6.031   | 5.9697  | 0.0296  |
| CEU | DEFB130 | 12444389 | 4.2493  | 5.1169  | -0.4802 |
| CEU | DEFB130 | 12449389 | 5.5824  | 6.6519  | -0.4682 |
| CEU | DEFB130 | 12454389 | 6.0787  | 6.3108  | -0.1066 |
| CEU | DEFB130 | 12459389 | 2.6411  | 3.2407  | -0.4917 |
| CEU | DEFB130 | 12464389 | 3.894   | 4.2641  | -0.2402 |
| CEU | DEFB130 | 12469389 | 12.1556 | 11.5982 | 0.146   |
| CEU | DEFB130 | 12474389 | 19.3221 | 17.2268 | 0.377   |
| CEU | DEFB130 | 12479389 | 20.9638 | 20.8086 | 0.0233  |
| CEU | DEFB130 | 12484389 | 18.9215 | 19.6147 | -0.1101 |
| CEU | DEFB130 | 12489389 | 23.8084 | 19.103  | 0.7667  |
| CEU | DEFB130 | 12494389 | 23.8358 | 19.9558 | 0.6062  |
| CEU | DEFB130 | 12499389 | 17.9798 | 17.2268 | 0.1355  |
| CEU | DEFB130 | 12504389 | 19.3562 | 18.0796 | 0.2193  |
| CEU | DEFB130 | 12509389 | 17.6776 | 16.374  | 0.2463  |
| CEU | DEFB130 | 12514389 | 20.899  | 18.7619 | 0.3543  |
| CEU | DEFB130 | 12519389 | 20.3211 | 21.4909 | -0.1702 |
| CEU | DEFB130 | 12524389 | 16.6099 | 17.3974 | -0.1404 |
| CEU | DEFB130 | 12529389 | 21.5121 | 18.5913 | 0.4885  |
| CEU | DEFB130 | 12534389 | 24.9239 | 21.3203 | 0.5282  |
| CEU | DEFB130 | 12539389 | 26.5483 | 19.2736 | 1.1753  |
| CEU | DEFB130 | 12544389 | 21.9011 | 22.0026 | -0.0144 |
| CEU | DEFB130 | 12549389 | 15.8718 | 22.6848 | -0.9405 |
| CEU | DEFB130 | 12554389 | 11.7301 | 17.3974 | -1.0102 |
| CEU | DEFB130 | 12559389 | 6.6457  | 14.6684 | -1.6832 |
| CEU | DEFB130 | 12564389 | 6.1646  | 16.8857 | -1.9665 |
| CHB | DEFB130 | 11569389 | 3.8886  | 7.4543  | -1.4036 |
| CHB | DEFB130 | 11574389 | 2.5884  | 6.4378  | -1.7308 |

## 2\_TajimasD\_data

|     |         |          |         |         |         |
|-----|---------|----------|---------|---------|---------|
| CHB | DEFB130 | 11579389 | 5.2273  | 8.4708  | -1.1355 |
| CHB | DEFB130 | 11584389 | 9.0607  | 11.6896 | -0.6818 |
| CHB | DEFB130 | 11589389 | 8.446   | 10.1649 | -0.5081 |
| CHB | DEFB130 | 11594389 | 6.4434  | 9.9955  | -1.0666 |
| CHB | DEFB130 | 11599389 | 6.6616  | 12.7061 | -1.449  |
| CHB | DEFB130 | 11604389 | 10.2106 | 15.0779 | -0.9919 |
| CHB | DEFB130 | 11609389 | 16.8523 | 19.1439 | -0.3716 |
| CHB | DEFB130 | 11614389 | 19.9804 | 21.5157 | -0.2224 |
| CHB | DEFB130 | 11619389 | 17.4776 | 18.8051 | -0.219  |
| CHB | DEFB130 | 11624389 | 15.8791 | 17.7886 | -0.3322 |
| CHB | DEFB130 | 11629389 | 14.9054 | 16.4333 | -0.2868 |
| CHB | DEFB130 | 11634389 | 14.5128 | 15.2474 | -0.1481 |
| CHB | DEFB130 | 11639389 | 14.8961 | 16.2638 | -0.2593 |
| CHB | DEFB130 | 11644389 | 20.9908 | 19.6521 | 0.2117  |
| CHB | DEFB130 | 11649389 | 23.7928 | 23.0404 | 0.102   |
| CHB | DEFB130 | 11654389 | 19.8161 | 21.6851 | -0.2687 |
| CHB | DEFB130 | 11659389 | 17.7424 | 20.4992 | -0.4185 |
| CHB | DEFB130 | 11664389 | 19.9027 | 21.6851 | -0.2563 |
| CHB | DEFB130 | 11669389 | 15.5802 | 22.1934 | -0.9298 |
| CHB | DEFB130 | 11674389 | 10.6486 | 22.1934 | -1.6232 |
| CHB | DEFB130 | 11679389 | 12.4627 | 22.3628 | -1.3817 |
| CHB | DEFB130 | 11684389 | 12.887  | 22.7016 | -1.35   |
| CHB | DEFB130 | 11689389 | 15.0784 | 21.1769 | -0.8972 |
| CHB | DEFB130 | 11694389 | 12.5003 | 20.8381 | -1.2459 |
| CHB | DEFB130 | 11699389 | 12.2075 | 25.5817 | -1.6385 |
| CHB | DEFB130 | 11704389 | 20.1614 | 28.1229 | -0.8896 |
| CHB | DEFB130 | 11709389 | 16.3463 | 22.871  | -0.8911 |
| CHB | DEFB130 | 11714389 | 6.1748  | 14.4003 | -1.7513 |
| CHB | DEFB130 | 11719389 | 7.2909  | 10.8426 | -0.9885 |
| CHB | DEFB130 | 11724389 | 8.6067  | 10.3343 | -0.5029 |
| CHB | DEFB130 | 11729389 | 11.0617 | 10.6731 | 0.1098  |
| CHB | DEFB130 | 11734389 | 16.2294 | 12.1979 | 1.0044  |
| CHB | DEFB130 | 11739389 | 15.0933 | 13.045  | 0.479   |
| CHB | DEFB130 | 11744389 | 17.3394 | 16.6027 | 0.1369  |
| CHB | DEFB130 | 11749389 | 21.6238 | 17.2803 | 0.777   |
| CHB | DEFB130 | 11754389 | 13.2686 | 13.3838 | -0.0263 |
| CHB | DEFB130 | 11759389 | 4.9261  | 12.1979 | -1.8117 |
| CHB | DEFB130 | 11764389 | 23.3607 | 19.4827 | 0.6183  |
| CHB | DEFB130 | 11769389 | 40.9284 | 25.7511 | 1.8476  |
| CHB | DEFB130 | 11774389 | 26.3855 | 26.7676 | -0.0448 |
| CHB | DEFB130 | 11779389 | 11.3147 | 33.3748 | -2.0858 |
| CHB | DEFB130 | 11784389 | 12.3762 | 35.5772 | -2.0607 |
| CHB | DEFB130 | 11789389 | 15.4852 | 38.1184 | -1.8789 |
| CHB | DEFB130 | 11794389 | 11.877  | 34.3913 | -2.0672 |
| CHB | DEFB130 | 11799389 | 6.34    | 20.6686 | -2.1579 |
| CHB | DEFB130 | 11804389 | 4.4055  | 15.925  | -2.2283 |
| CHB | DEFB130 | 11809389 | 8.4991  | 15.2474 | -1.3607 |
| CHB | DEFB130 | 11814389 | 18.3344 | 16.9415 | 0.254   |
| CHB | DEFB130 | 11819389 | 20.1777 | 16.6027 | 0.6645  |

## 2\_TajimasD\_data

|     |         |          |         |         |         |
|-----|---------|----------|---------|---------|---------|
| CHB | DEFB130 | 11824389 | 14.617  | 15.5862 | -0.1914 |
| CHB | DEFB130 | 11829389 | 10.0042 | 16.9415 | -1.2648 |
| CHB | DEFB130 | 11834389 | 6.3345  | 15.925  | -1.8552 |
| CHB | DEFB130 | 11839389 | 4.0432  | 14.0615 | -2.1818 |
| CHB | DEFB130 | 11844389 | 3.314   | 12.5367 | -2.2391 |
| CHB | DEFB130 | 11849389 | 4.7568  | 11.6896 | -1.7979 |
| CHB | DEFB130 | 11854389 | 5.2352  | 13.2144 | -1.8432 |
| CHB | DEFB130 | 11859389 | 4.6961  | 16.6027 | -2.2132 |
| CHB | DEFB130 | 11864389 | 4.5724  | 18.8051 | -2.3477 |
| CHB | DEFB130 | 11869389 | 7.8025  | 26.4288 | -2.2109 |
| CHB | DEFB130 | 11874389 | 7.3134  | 26.2593 | -2.2629 |
| CHB | DEFB130 | 11879389 | 4.329   | 24.3958 | -2.5744 |
| CHB | DEFB130 | 11884389 | 5.3883  | 27.9535 | -2.5362 |
| CHB | DEFB130 | 11889389 | 6.4212  | 28.2923 | -2.4296 |
| CHB | DEFB130 | 11894389 | 5.441   | 23.8875 | -2.4153 |
| CHB | DEFB130 | 11899389 | 2.119   | 9.1484  | -2.2919 |
| CHB | DEFB130 | 11904389 | 0.7601  | 4.2354  | -2.2624 |
| CHB | DEFB130 | 11909389 | 1.202   | 5.7601  | -2.2646 |
| CHB | DEFB130 | 11914389 | 1.3263  | 5.7601  | -2.2028 |
| CHB | DEFB130 | 11919389 | 1.3529  | 7.2848  | -2.3844 |
| CHB | DEFB130 | 11924389 | 0.6408  | 4.4048  | -2.3685 |
| CHB | DEFB130 | 11929389 | 0.8745  | 2.8801  | -1.8083 |
| CHB | DEFB130 | 11934389 | 1.2545  | 2.3718  | -1.1794 |
| CHB | DEFB130 | 11939389 | 0.533   | 0.6777  | -0.3783 |
| CHB | DEFB130 | 11944389 | 1.5334  | 2.2024  | -0.7491 |
| CHB | DEFB130 | 11949389 | 5       | 3.5577  | 1.09    |
| CHB | DEFB130 | 11954389 | 4.0259  | 1.8636  | 2.7588  |
| CHB | DEFB130 | 11959389 | 1.0367  | 0.8471  | 0.4275  |
| CHB | DEFB130 | 11964389 | 1.127   | 1.5247  | -0.5908 |
| CHB | DEFB130 | 11969389 | 2.0647  | 1.6942  | 0.5085  |
| CHB | DEFB130 | 11974389 | 9.8964  | 5.2519  | 2.5049  |
| CHB | DEFB130 | 11979389 | 12.8574 | 10.1649 | 0.7959  |
| CHB | DEFB130 | 11984389 | 10.7843 | 14.7391 | -0.8236 |
| CHB | DEFB130 | 11989389 | 15.8131 | 21.1769 | -0.7891 |
| CHB | DEFB130 | 11994389 | 25.1272 | 25.5817 | -0.0557 |
| CHB | DEFB130 | 11999389 | 24.842  | 20.6686 | 0.6285  |
| CHB | DEFB130 | 12004389 | 13.1393 | 12.0285 | 0.2804  |
| CHB | DEFB130 | 12009389 | 5.1058  | 6.6072  | -0.6594 |
| CHB | DEFB130 | 12014389 | 2.0291  | 3.7271  | -1.2336 |
| CHB | DEFB130 | 12019389 | 1.0685  | 2.5412  | -1.4706 |
| CHB | DEFB130 | 12024389 | 0.174   | 0.8471  | -1.5178 |
| CHB | DEFB130 | 12029389 | 2.3371  | 6.0989  | -1.7757 |
| CHB | DEFB130 | 12034389 | 9.4108  | 11.1814 | -0.4788 |
| CHB | DEFB130 | 12039389 | 9.5795  | 8.979   | 0.1992  |
| CHB | DEFB130 | 12044389 | 2.7896  | 4.4048  | -1.0164 |
| CHB | DEFB130 | 12049389 | 1.1148  | 2.3718  | -1.3269 |
| CHB | DEFB130 | 12054389 | 1.585   | 3.3883  | -1.4201 |
| CHB | DEFB130 | 12059389 | 2.4576  | 3.0495  | -0.509  |
| CHB | DEFB130 | 12064389 | 2.3251  | 1.8636  | 0.5888  |

## 2\_TajimasD\_data

|     |         |          |         |         |         |
|-----|---------|----------|---------|---------|---------|
| CHB | DEFB130 | 12069389 | 2.8171  | 3.0495  | -0.1999 |
| CHB | DEFB130 | 12074389 | 4.4483  | 3.3883  | 0.8348  |
| CHB | DEFB130 | 12079389 | 3.1397  | 2.2024  | 1.0495  |
| CHB | DEFB130 | 12084389 | 3.1445  | 10.3343 | -2.0928 |
| CHB | DEFB130 | 12089389 | 2.7921  | 12.8755 | -2.3872 |
| CHB | DEFB130 | 12094389 | 0.5151  | 3.7271  | -2.3334 |
| CHB | DEFB130 | 12099389 | 0       | 0       | 0       |
| CHB | DEFB130 | 12104389 | 0       | 0       | 0       |
| CHB | DEFB130 | 12109389 | 0       | 0       | 0       |
| CHB | DEFB130 | 12114389 | 0       | 0       | 0       |
| CHB | DEFB130 | 12119389 | 0       | 0       | 0       |
| CHB | DEFB130 | 12124389 | 0       | 0       | 0       |
| CHB | DEFB130 | 12129389 | 0       | 0       | 0       |
| CHB | DEFB130 | 12134389 | 0       | 0       | 0       |
| CHB | DEFB130 | 12139389 | 0.3225  | 2.5412  | -2.2155 |
| CHB | DEFB130 | 12144389 | 1.4346  | 6.0989  | -2.2018 |
| CHB | DEFB130 | 12149389 | 1.2073  | 4.4048  | -2.012  |
| CHB | DEFB130 | 12154389 | 0.7464  | 1.8636  | -1.4254 |
| CHB | DEFB130 | 12159389 | 0.6804  | 1.5247  | -1.2543 |
| CHB | DEFB130 | 12164389 | 1.2745  | 4.2354  | -1.9276 |
| CHB | DEFB130 | 12169389 | 2.0025  | 4.7436  | -1.6169 |
| CHB | DEFB130 | 12174389 | 1.9577  | 6.7766  | -2.0686 |
| CHB | DEFB130 | 12179389 | 3.0156  | 14.5697 | -2.4327 |
| CHB | DEFB130 | 12184389 | 3.0853  | 13.892  | -2.3807 |
| CHB | DEFB130 | 12189389 | 1.7352  | 7.7931  | -2.2896 |
| CHB | DEFB130 | 12194389 | 1.3071  | 5.2519  | -2.1276 |
| CHB | DEFB130 | 12199389 | 1.3623  | 3.7271  | -1.718  |
| CHB | DEFB130 | 12204389 | 0.5395  | 1.5247  | -1.4637 |
| CHB | DEFB130 | 12209389 | 0.0485  | 0.6777  | -1.6449 |
| CHB | DEFB130 | 12214389 | 0.9134  | 2.3718  | -1.5395 |
| CHB | DEFB130 | 12219389 | 1.1317  | 3.5577  | -1.8334 |
| CHB | DEFB130 | 12224389 | 0.5176  | 4.2354  | -2.4203 |
| CHB | DEFB130 | 12229389 | 4.5957  | 9.9955  | -1.6215 |
| CHB | DEFB130 | 12234389 | 14.0725 | 18.4662 | -0.7375 |
| CHB | DEFB130 | 12239389 | 19.1938 | 22.1934 | -0.4217 |
| CHB | DEFB130 | 12244389 | 15.2895 | 18.6357 | -0.5568 |
| CHB | DEFB130 | 12249389 | 6.4434  | 9.8261  | -1.0321 |
| CHB | DEFB130 | 12254389 | 1.1152  | 2.7106  | -1.5117 |
| CHB | DEFB130 | 12259389 | 1.7655  | 2.033   | -0.319  |
| CHB | DEFB130 | 12264389 | 1.2509  | 1.5247  | -0.4068 |
| CHB | DEFB130 | 12269389 | 1.1843  | 2.2024  | -1.14   |
| CHB | DEFB130 | 12274389 | 5.824   | 8.1319  | -0.8389 |
| CHB | DEFB130 | 12279389 | 7.3391  | 8.6402  | -0.4472 |
| CHB | DEFB130 | 12284389 | 7.9374  | 7.2848  | 0.2623  |
| CHB | DEFB130 | 12289389 | 6.5656  | 6.2684  | 0.1369  |
| CHB | DEFB130 | 12294389 | 2.478   | 3.3883  | -0.7169 |
| CHB | DEFB130 | 12299389 | 2.4238  | 2.8801  | -0.4114 |
| CHB | DEFB130 | 12304389 | 4.8989  | 3.5577  | 1.0136  |
| CHB | DEFB130 | 12309389 | 4.819   | 3.3883  | 1.1267  |

## 2\_TajimasD\_data

|     |         |          |         |         |         |
|-----|---------|----------|---------|---------|---------|
| CHB | DEFB130 | 12314389 | 1.8058  | 1.3553  | 0.7301  |
| CHB | DEFB130 | 12319389 | 0.8247  | 1.0165  | -0.3817 |
| CHB | DEFB130 | 12324389 | 0.3063  | 1.0165  | -1.4133 |
| CHB | DEFB130 | 12329389 | 0.624   | 1.1859  | -1.003  |
| CHB | DEFB130 | 12334389 | 1.3394  | 1.8636  | -0.6688 |
| CHB | DEFB130 | 12339389 | 6.6337  | 5.5907  | 0.5322  |
| CHB | DEFB130 | 12344389 | 6.2779  | 6.2684  | 0.0044  |
| CHB | DEFB130 | 12349389 | 1.5673  | 3.0495  | -1.2747 |
| CHB | DEFB130 | 12354389 | 1.2199  | 2.3718  | -1.2159 |
| CHB | DEFB130 | 12359389 | 0.7291  | 2.033   | -1.5549 |
| CHB | DEFB130 | 12364389 | 0.7729  | 1.5247  | -1.1169 |
| CHB | DEFB130 | 12369389 | 0.684   | 1.0165  | -0.6617 |
| CHB | DEFB130 | 12374389 | 2.3493  | 2.2024  | 0.1645  |
| CHB | DEFB130 | 12379389 | 3.7639  | 3.3883  | 0.2958  |
| CHB | DEFB130 | 12384389 | 2.4708  | 2.5412  | -0.0703 |
| CHB | DEFB130 | 12389389 | 1.2462  | 1.6942  | -0.6148 |
| CHB | DEFB130 | 12394389 | 5.59    | 5.0825  | 0.2818  |
| CHB | DEFB130 | 12399389 | 10.5321 | 7.7931  | 1.0352  |
| CHB | DEFB130 | 12404389 | 9.747   | 6.7766  | 1.2751  |
| CHB | DEFB130 | 12409389 | 5.8629  | 5.0825  | 0.4333  |
| CHB | DEFB130 | 12414389 | 6.3937  | 5.2519  | 0.6158  |
| CHB | DEFB130 | 12419389 | 8.0624  | 6.4378  | 0.7305  |
| CHB | DEFB130 | 12424389 | 7.4687  | 8.6402  | -0.4027 |
| CHB | DEFB130 | 12429389 | 8.8742  | 9.1484  | -0.0894 |
| CHB | DEFB130 | 12434389 | 8.8009  | 9.3178  | -0.1657 |
| CHB | DEFB130 | 12439389 | 6.2448  | 7.6237  | -0.5317 |
| CHB | DEFB130 | 12444389 | 4.2269  | 4.066   | 0.1085  |
| CHB | DEFB130 | 12449389 | 6.0261  | 5.4213  | 0.3171  |
| CHB | DEFB130 | 12454389 | 6.3488  | 6.2684  | 0.037   |
| CHB | DEFB130 | 12459389 | 2.3994  | 3.5577  | -0.8754 |
| CHB | DEFB130 | 12464389 | 3.5431  | 4.7436  | -0.7081 |
| CHB | DEFB130 | 12469389 | 10.7342 | 13.045  | -0.5403 |
| CHB | DEFB130 | 12474389 | 16.6687 | 19.8216 | -0.4944 |
| CHB | DEFB130 | 12479389 | 18.1511 | 26.7676 | -1.0102 |
| CHB | DEFB130 | 12484389 | 17.0626 | 27.4452 | -1.188  |
| CHB | DEFB130 | 12489389 | 21.0072 | 28.8006 | -0.8509 |
| CHB | DEFB130 | 12494389 | 22.1559 | 31.5112 | -0.9356 |
| CHB | DEFB130 | 12499389 | 18.333  | 26.4288 | -0.961  |
| CHB | DEFB130 | 12504389 | 19.2658 | 28.2923 | -1.0027 |
| CHB | DEFB130 | 12509389 | 20.0704 | 29.3088 | -0.9916 |
| CHB | DEFB130 | 12514389 | 24.2928 | 29.3088 | -0.5384 |
| CHB | DEFB130 | 12519389 | 23.8245 | 32.3583 | -0.8316 |
| CHB | DEFB130 | 12524389 | 21.0533 | 31.6806 | -1.0573 |
| CHB | DEFB130 | 12529389 | 24.7523 | 30.8335 | -0.6212 |
| CHB | DEFB130 | 12534389 | 27.2367 | 29.9865 | -0.2886 |
| CHB | DEFB130 | 12539389 | 30.2529 | 31.3418 | -0.1095 |
| CHB | DEFB130 | 12544389 | 25.9749 | 34.0524 | -0.7489 |
| CHB | DEFB130 | 12549389 | 20.4262 | 28.6311 | -0.9009 |
| CHB | DEFB130 | 12554389 | 13.7459 | 24.904  | -1.4031 |

## 2\_TajimasD\_data

|     |         |          |         |         |         |
|-----|---------|----------|---------|---------|---------|
| CHB | DEFB130 | 12559389 | 6.2939  | 24.904  | -2.3402 |
| CHB | DEFB130 | 12564389 | 7.151   | 27.2758 | -2.3166 |
| YRI | DEFB130 | 11569389 | 8.2131  | 13.1089 | -1.1357 |
| YRI | DEFB130 | 11574389 | 7.911   | 11.2602 | -0.8966 |
| YRI | DEFB130 | 11579389 | 10.4157 | 16.134  | -1.0888 |
| YRI | DEFB130 | 11584389 | 12.267  | 20.8397 | -1.2765 |
| YRI | DEFB130 | 11589389 | 13.1051 | 18.4868 | -0.8994 |
| YRI | DEFB130 | 11594389 | 15.0888 | 16.8062 | -0.3145 |
| YRI | DEFB130 | 11599389 | 13.6805 | 18.1507 | -0.7603 |
| YRI | DEFB130 | 11604389 | 14.8798 | 19.3272 | -0.7121 |
| YRI | DEFB130 | 11609389 | 25.3892 | 24.0329 | 0.176   |
| YRI | DEFB130 | 11614389 | 27.9517 | 27.2261 | 0.0834  |
| YRI | DEFB130 | 11619389 | 20.9967 | 22.8565 | -0.2533 |
| YRI | DEFB130 | 11624389 | 22.9293 | 24.5371 | -0.2044 |
| YRI | DEFB130 | 11629389 | 21.815  | 24.369  | -0.3269 |
| YRI | DEFB130 | 11634389 | 13.8011 | 21.0078 | -1.0649 |
| YRI | DEFB130 | 11639389 | 13.6392 | 21.512  | -1.1369 |
| YRI | DEFB130 | 11644389 | 20.8666 | 24.369  | -0.4483 |
| YRI | DEFB130 | 11649389 | 26.7457 | 31.7638 | -0.4963 |
| YRI | DEFB130 | 11654389 | 25.6474 | 34.9569 | -0.8384 |
| YRI | DEFB130 | 11659389 | 21.0562 | 30.2512 | -0.9537 |
| YRI | DEFB130 | 11664389 | 21.4323 | 25.7135 | -0.5201 |
| YRI | DEFB130 | 11669389 | 23.0025 | 26.3858 | -0.4009 |
| YRI | DEFB130 | 11674389 | 24.8754 | 28.5706 | -0.4052 |
| YRI | DEFB130 | 11679389 | 25.2653 | 29.747  | -0.4725 |
| YRI | DEFB130 | 11684389 | 26.8498 | 33.4444 | -0.6202 |
| YRI | DEFB130 | 11689389 | 25.4496 | 32.2679 | -0.664  |
| YRI | DEFB130 | 11694389 | 18.5153 | 28.9067 | -1.1266 |
| YRI | DEFB130 | 11699389 | 23.0952 | 34.7889 | -1.0581 |
| YRI | DEFB130 | 11704389 | 30.8647 | 36.8056 | -0.5087 |
| YRI | DEFB130 | 11709389 | 23.7613 | 28.9067 | -0.5579 |
| YRI | DEFB130 | 11714389 | 12.2321 | 20.8397 | -1.2817 |
| YRI | DEFB130 | 11719389 | 11.2548 | 19.1591 | -1.2763 |
| YRI | DEFB130 | 11724389 | 13.3911 | 19.4952 | -0.9693 |
| YRI | DEFB130 | 11729389 | 13.0956 | 17.9827 | -0.8387 |
| YRI | DEFB130 | 11734389 | 15.7562 | 20.5036 | -0.7181 |
| YRI | DEFB130 | 11739389 | 17.6649 | 20.6717 | -0.4512 |
| YRI | DEFB130 | 11744389 | 22.4025 | 20.8397 | 0.2327  |
| YRI | DEFB130 | 11749389 | 26.3705 | 22.6884 | 0.5051  |
| YRI | DEFB130 | 11754389 | 20.7916 | 21.8481 | -0.1503 |
| YRI | DEFB130 | 11759389 | 14.9672 | 23.8648 | -1.1622 |
| YRI | DEFB130 | 11764389 | 32.6912 | 34.1166 | -0.1315 |
| YRI | DEFB130 | 11769389 | 48.5666 | 38.9904 | 0.7749  |
| YRI | DEFB130 | 11774389 | 43.6106 | 39.4946 | 0.3289  |
| YRI | DEFB130 | 11779389 | 60.3292 | 48.4019 | 0.7805  |
| YRI | DEFB130 | 11784389 | 65.2191 | 51.5951 | 0.8372  |
| YRI | DEFB130 | 11789389 | 61.2047 | 56.805  | 0.2459  |
| YRI | DEFB130 | 11794389 | 59.1567 | 52.7715 | 0.3837  |
| YRI | DEFB130 | 11799389 | 34.5308 | 35.4611 | -0.0826 |



## 2\_TajimasD\_data

|     |         |          |         |         |         |
|-----|---------|----------|---------|---------|---------|
| YRI | DEFB130 | 11804389 | 21.2753 | 26.5538 | -0.6216 |
| YRI | DEFB130 | 11809389 | 21.8505 | 24.7051 | -0.3606 |
| YRI | DEFB130 | 11814389 | 24.381  | 25.3774 | -0.1226 |
| YRI | DEFB130 | 11819389 | 24.4477 | 23.0245 | 0.1925  |
| YRI | DEFB130 | 11824389 | 24.2368 | 23.0245 | 0.1639  |
| YRI | DEFB130 | 11829389 | 22.6951 | 23.6968 | -0.1317 |
| YRI | DEFB130 | 11834389 | 17.8519 | 21.3439 | -0.5081 |
| YRI | DEFB130 | 11839389 | 17.8812 | 20.5036 | -0.3967 |
| YRI | DEFB130 | 11844389 | 17.2809 | 18.991  | -0.2785 |
| YRI | DEFB130 | 11849389 | 15.437  | 17.6465 | -0.3861 |
| YRI | DEFB130 | 11854389 | 16.8414 | 19.8313 | -0.467  |
| YRI | DEFB130 | 11859389 | 18.1544 | 24.369  | -0.7954 |
| YRI | DEFB130 | 11864389 | 20.3603 | 30.7554 | -1.061  |
| YRI | DEFB130 | 11869389 | 32.0489 | 45.3768 | -0.9293 |
| YRI | DEFB130 | 11874389 | 30.7072 | 43.8642 | -0.9485 |
| YRI | DEFB130 | 11879389 | 21.4187 | 33.2763 | -1.1206 |
| YRI | DEFB130 | 11884389 | 28.8992 | 36.8056 | -0.677  |
| YRI | DEFB130 | 11889389 | 32.3846 | 37.3098 | -0.4162 |
| YRI | DEFB130 | 11894389 | 29.2221 | 32.436  | -0.3114 |
| YRI | DEFB130 | 11899389 | 15.0079 | 15.6298 | -0.1221 |
| YRI | DEFB130 | 11904389 | 7.3473  | 6.8906  | 0.1924  |
| YRI | DEFB130 | 11909389 | 8.1741  | 9.2434  | -0.3441 |
| YRI | DEFB130 | 11914389 | 7.8227  | 8.9073  | -0.3612 |
| YRI | DEFB130 | 11919389 | 10.1587 | 9.2434  | 0.2946  |
| YRI | DEFB130 | 11924389 | 4.9645  | 4.8738  | 0.0521  |
| YRI | DEFB130 | 11929389 | 3.7476  | 4.2016  | -0.2966 |
| YRI | DEFB130 | 11934389 | 5.1938  | 5.7141  | -0.2595 |
| YRI | DEFB130 | 11939389 | 2.9372  | 3.3612  | -0.335  |
| YRI | DEFB130 | 11944389 | 5.2003  | 3.6974  | 1.0954  |
| YRI | DEFB130 | 11949389 | 6.9875  | 5.7141  | 0.635   |
| YRI | DEFB130 | 11954389 | 3.4667  | 4.2016  | -0.4801 |
| YRI | DEFB130 | 11959389 | 1.4226  | 1.8487  | -0.545  |
| YRI | DEFB130 | 11964389 | 1.0755  | 2.1848  | -1.2455 |
| YRI | DEFB130 | 11969389 | 2.249   | 3.6974  | -1.0557 |
| YRI | DEFB130 | 11974389 | 9.7669  | 8.9073  | 0.2863  |
| YRI | DEFB130 | 11979389 | 13.0726 | 14.6214 | -0.3239 |
| YRI | DEFB130 | 11984389 | 15.8209 | 23.5287 | -1.0207 |
| YRI | DEFB130 | 11989389 | 26.1283 | 34.4528 | -0.7604 |
| YRI | DEFB130 | 11994389 | 31.6603 | 37.814  | -0.5132 |
| YRI | DEFB130 | 11999389 | 25.0852 | 32.436  | -0.7123 |
| YRI | DEFB130 | 12004389 | 14.187  | 20.3355 | -0.9374 |
| YRI | DEFB130 | 12009389 | 8.4995  | 9.7476  | -0.3823 |
| YRI | DEFB130 | 12014389 | 4.278   | 5.0419  | -0.4256 |
| YRI | DEFB130 | 12019389 | 2.0513  | 3.5293  | -1.1206 |
| YRI | DEFB130 | 12024389 | 0.9843  | 2.1848  | -1.3479 |
| YRI | DEFB130 | 12029389 | 5.29    | 7.5628  | -0.8799 |
| YRI | DEFB130 | 12034389 | 13.3648 | 15.1256 | -0.3565 |
| YRI | DEFB130 | 12039389 | 12.4292 | 12.9408 | -0.1201 |
| YRI | DEFB130 | 12044389 | 5.3658  | 6.7225  | -0.5846 |

## 2\_TajimasD\_data

|     |         |          |         |         |         |
|-----|---------|----------|---------|---------|---------|
| YRI | DEFB130 | 12049389 | 3.6571  | 5.5461  | -0.9673 |
| YRI | DEFB130 | 12054389 | 4.2159  | 6.3864  | -0.9796 |
| YRI | DEFB130 | 12059389 | 3.4491  | 5.0419  | -0.8875 |
| YRI | DEFB130 | 12064389 | 2.5584  | 4.5377  | -1.2094 |
| YRI | DEFB130 | 12069389 | 3.6292  | 5.5461  | -0.9816 |
| YRI | DEFB130 | 12074389 | 3.8222  | 3.8654  | -0.0303 |
| YRI | DEFB130 | 12079389 | 2.8816  | 2.3529  | 0.5597  |
| YRI | DEFB130 | 12084389 | 16.1756 | 19.8313 | -0.571  |
| YRI | DEFB130 | 12089389 | 21.1568 | 24.8732 | -0.4663 |
| YRI | DEFB130 | 12094389 | 6.7102  | 6.3864  | 0.1461  |
| YRI | DEFB130 | 12099389 | 0       | 0       | 0       |
| YRI | DEFB130 | 12104389 | 0       | 0       | 0       |
| YRI | DEFB130 | 12109389 | 0       | 0       | 0       |
| YRI | DEFB130 | 12114389 | 0       | 0       | 0       |
| YRI | DEFB130 | 12119389 | 0       | 0       | 0       |
| YRI | DEFB130 | 12124389 | 0       | 0       | 0       |
| YRI | DEFB130 | 12129389 | 0       | 0       | 0       |
| YRI | DEFB130 | 12134389 | 0       | 0       | 0       |
| YRI | DEFB130 | 12139389 | 3.4109  | 4.2016  | -0.5165 |
| YRI | DEFB130 | 12144389 | 10.9207 | 8.7392  | 0.7395  |
| YRI | DEFB130 | 12149389 | 8.8729  | 6.5544  | 1.0222  |
| YRI | DEFB130 | 12154389 | 2.6285  | 3.1932  | -0.4657 |
| YRI | DEFB130 | 12159389 | 2.444   | 2.3529  | 0.0964  |
| YRI | DEFB130 | 12164389 | 7.8984  | 5.378   | 1.3264  |
| YRI | DEFB130 | 12169389 | 7.6445  | 5.5461  | 1.0746  |
| YRI | DEFB130 | 12174389 | 8.6495  | 10.924  | -0.6264 |
| YRI | DEFB130 | 12179389 | 15.7719 | 20.1675 | -0.6756 |
| YRI | DEFB130 | 12184389 | 13.3944 | 17.3104 | -0.697  |
| YRI | DEFB130 | 12189389 | 8.0192  | 10.5879 | -0.7285 |
| YRI | DEFB130 | 12194389 | 4.9909  | 6.8906  | -0.8005 |
| YRI | DEFB130 | 12199389 | 4.6558  | 6.0502  | -0.6607 |
| YRI | DEFB130 | 12204389 | 3.0813  | 4.0335  | -0.6443 |
| YRI | DEFB130 | 12209389 | 1.1774  | 1.5126  | -0.4991 |
| YRI | DEFB130 | 12214389 | 3.8452  | 4.0335  | -0.1274 |
| YRI | DEFB130 | 12219389 | 5.1063  | 6.3864  | -0.5777 |
| YRI | DEFB130 | 12224389 | 6.3765  | 7.3947  | -0.4023 |
| YRI | DEFB130 | 12229389 | 17.2068 | 17.6465 | -0.0768 |
| YRI | DEFB130 | 12234389 | 35.0714 | 34.6208 | 0.041   |
| YRI | DEFB130 | 12239389 | 36.146  | 38.3182 | -0.1788 |
| YRI | DEFB130 | 12244389 | 25.5021 | 27.7303 | -0.2516 |
| YRI | DEFB130 | 12249389 | 15.2325 | 15.7978 | -0.1098 |
| YRI | DEFB130 | 12254389 | 4.4845  | 7.3947  | -1.15   |
| YRI | DEFB130 | 12259389 | 2.7625  | 4.8738  | -1.212  |
| YRI | DEFB130 | 12264389 | 1.9004  | 3.5293  | -1.235  |
| YRI | DEFB130 | 12269389 | 2.9122  | 5.2099  | -1.2437 |
| YRI | DEFB130 | 12274389 | 9.7421  | 14.6214 | -1.0204 |
| YRI | DEFB130 | 12279389 | 11.3232 | 14.7895 | -0.7171 |
| YRI | DEFB130 | 12284389 | 12.3746 | 12.4366 | -0.0151 |
| YRI | DEFB130 | 12289389 | 10.7381 | 11.0921 | -0.0961 |

## 2\_TajimasD\_data

|     |         |          |         |         |         |
|-----|---------|----------|---------|---------|---------|
| YRI | DEFB130 | 12294389 | 4.357   | 5.378   | -0.5373 |
| YRI | DEFB130 | 12299389 | 3.5331  | 4.7057  | -0.6941 |
| YRI | DEFB130 | 12304389 | 6.109   | 6.2183  | -0.0505 |
| YRI | DEFB130 | 12309389 | 5.828   | 6.8906  | -0.4477 |
| YRI | DEFB130 | 12314389 | 2.2839  | 4.7057  | -1.4336 |
| YRI | DEFB130 | 12319389 | 1.9562  | 3.0251  | -0.9221 |
| YRI | DEFB130 | 12324389 | 1.8149  | 3.1932  | -1.1367 |
| YRI | DEFB130 | 12329389 | 1.5948  | 4.2016  | -1.7028 |
| YRI | DEFB130 | 12334389 | 1.7703  | 4.8738  | -1.7815 |
| YRI | DEFB130 | 12339389 | 7.9837  | 8.067   | -0.0304 |
| YRI | DEFB130 | 12344389 | 9.2461  | 8.4031  | 0.2963  |
| YRI | DEFB130 | 12349389 | 2.7411  | 4.5377  | -1.0978 |
| YRI | DEFB130 | 12354389 | 0.9774  | 1.8487  | -1.1145 |
| YRI | DEFB130 | 12359389 | 2.2693  | 2.1848  | 0.0949  |
| YRI | DEFB130 | 12364389 | 2.0574  | 2.8571  | -0.7232 |
| YRI | DEFB130 | 12369389 | 1.4209  | 1.8487  | -0.5472 |
| YRI | DEFB130 | 12374389 | 3.9843  | 3.6974  | 0.2091  |
| YRI | DEFB130 | 12379389 | 5.1864  | 5.378   | -0.1008 |
| YRI | DEFB130 | 12384389 | 2.9049  | 3.5293  | -0.4734 |
| YRI | DEFB130 | 12389389 | 1.2811  | 1.3445  | -0.103  |
| YRI | DEFB130 | 12394389 | 6.0429  | 6.0502  | -0.0035 |
| YRI | DEFB130 | 12399389 | 11.1155 | 9.7476  | 0.419   |
| YRI | DEFB130 | 12404389 | 10.9199 | 8.4031  | 0.8846  |
| YRI | DEFB130 | 12409389 | 6.9504  | 7.3947  | -0.1756 |
| YRI | DEFB130 | 12414389 | 6.2741  | 8.067   | -0.6542 |
| YRI | DEFB130 | 12419389 | 7.557   | 7.8989  | -0.1272 |
| YRI | DEFB130 | 12424389 | 8.1694  | 7.3947  | 0.3061  |
| YRI | DEFB130 | 12429389 | 9.6879  | 9.0754  | 0.2005  |
| YRI | DEFB130 | 12434389 | 10.4444 | 10.756  | -0.0871 |
| YRI | DEFB130 | 12439389 | 9.0334  | 10.5879 | -0.4408 |
| YRI | DEFB130 | 12444389 | 6.3715  | 8.5712  | -0.7591 |
| YRI | DEFB130 | 12449389 | 7.5904  | 8.7392  | -0.3894 |
| YRI | DEFB130 | 12454389 | 7.6589  | 8.5712  | -0.3148 |
| YRI | DEFB130 | 12459389 | 4.1896  | 5.0419  | -0.4749 |
| YRI | DEFB130 | 12464389 | 6.4155  | 9.2434  | -0.9101 |
| YRI | DEFB130 | 12469389 | 13.5864 | 21.68   | -1.1601 |
| YRI | DEFB130 | 12474389 | 19.1947 | 26.7219 | -0.881  |
| YRI | DEFB130 | 12479389 | 23.7531 | 32.6041 | -0.8533 |
| YRI | DEFB130 | 12484389 | 23.7802 | 37.814  | -1.1703 |
| YRI | DEFB130 | 12489389 | 31.1582 | 43.3601 | -0.8897 |
| YRI | DEFB130 | 12494389 | 31.1972 | 41.3433 | -0.7752 |
| YRI | DEFB130 | 12499389 | 23.4494 | 34.7889 | -1.0261 |
| YRI | DEFB130 | 12504389 | 25.241  | 37.6459 | -1.039  |
| YRI | DEFB130 | 12509389 | 23.2966 | 37.1417 | -1.175  |
| YRI | DEFB130 | 12514389 | 25.9193 | 44.2004 | -1.308  |
| YRI | DEFB130 | 12519389 | 25.8293 | 49.7464 | -1.5234 |
| YRI | DEFB130 | 12524389 | 25.3811 | 44.8726 | -1.3741 |
| YRI | DEFB130 | 12529389 | 30.6192 | 42.5197 | -0.8845 |
| YRI | DEFB130 | 12534389 | 30.1407 | 39.4946 | -0.7475 |

## 2\_TajimasD\_data

|     |         |          |         |         |         |
|-----|---------|----------|---------|---------|---------|
| YRI | DEFB130 | 12539389 | 31.776  | 38.9904 | -0.5838 |
| YRI | DEFB130 | 12544389 | 33.5315 | 44.7045 | -0.7906 |
| YRI | DEFB130 | 12549389 | 29.2015 | 41.1752 | -0.9185 |
| YRI | DEFB130 | 12554389 | 26.0377 | 34.6208 | -0.7803 |
| YRI | DEFB130 | 12559389 | 24.2719 | 34.1166 | -0.908  |
| YRI | DEFB130 | 12564389 | 25.8642 | 35.2931 | -0.8413 |
| CEU | DEFB130 | 11815962 | 21.138  | 14.4978 | 1.4087  |
| CEU | DEFB130 | 11820962 | 19.3714 | 12.1099 | 1.8268  |
| CEU | DEFB130 | 11825962 | 18.2272 | 13.3039 | 1.1333  |
| CEU | DEFB130 | 11830962 | 14.9342 | 11.4277 | 0.9316  |
| CEU | DEFB130 | 11835962 | 12.6607 | 11.2571 | 0.3782  |
| CEU | DEFB130 | 11840962 | 9.8155  | 10.916  | -0.3052 |
| CEU | DEFB130 | 11845962 | 9.5986  | 8.5281  | 0.3735  |
| CEU | DEFB130 | 11850962 | 11.9138 | 9.5515  | 0.7421  |
| CEU | DEFB130 | 11855962 | 13.2373 | 10.916  | 0.6438  |
| CEU | DEFB130 | 11860962 | 10.7135 | 11.0866 | -0.102  |
| CEU | DEFB130 | 11865962 | 10.0996 | 13.9861 | -0.8532 |
| CEU | DEFB130 | 11870962 | 20.2142 | 19.2736 | 0.152   |
| CEU | DEFB130 | 11875962 | 20.6131 | 19.2736 | 0.2164  |
| CEU | DEFB130 | 11880962 | 13.3941 | 17.7385 | -0.7601 |
| CEU | DEFB130 | 11885962 | 14.8343 | 16.5446 | -0.3199 |
| CEU | DEFB130 | 11890962 | 30.1474 | 19.7852 | 1.6323  |
| CEU | DEFB130 | 11895962 | 24.1115 | 14.3272 | 2.0993  |
| CEU | DEFB130 | 11900962 | 4.2039  | 3.4112  | 0.6226  |
| CEU | DEFB130 | 11905962 | 2.9314  | 2.2173  | 0.7978  |
| CEU | DEFB130 | 11910962 | 1.9476  | 1.5351  | 0.6117  |
| CEU | DEFB130 | 11915962 | 1.9637  | 1.7056  | 0.3535  |
| CEU | DEFB130 | 11920962 | 1.8883  | 1.5351  | 0.5237  |
| CEU | DEFB130 | 11925962 | 1.7549  | 1.0234  | 1.4535  |
| CEU | DEFB130 | 11930962 | 2.86    | 1.7056  | 1.5811  |
| CEU | DEFB130 | 11935962 | 1.9687  | 1.5351  | 0.6429  |
| CEU | DEFB130 | 11940962 | 0.0592  | 0.3411  | -1.1301 |
| CEU | DEFB130 | 11945962 | 3.0359  | 2.3879  | 0.6824  |
| CEU | DEFB130 | 11950962 | 6.1453  | 3.7524  | 1.7336  |
| CEU | DEFB130 | 11955962 | 3.7351  | 1.7056  | 2.7796  |
| CEU | DEFB130 | 11960962 | 1.0596  | 1.1939  | -0.2393 |
| CEU | DEFB130 | 11965962 | 0.8771  | 1.7056  | -1.1347 |
| CEU | DEFB130 | 11970962 | 3.523   | 2.5584  | 0.9609  |
| CEU | DEFB130 | 11975962 | 11.1538 | 6.9931  | 1.7409  |
| CEU | DEFB130 | 11980962 | 11.5279 | 10.0632 | 0.4383  |
| CEU | DEFB130 | 11985962 | 12.0087 | 14.4978 | -0.5281 |
| CEU | DEFB130 | 11990962 | 20.7607 | 21.3203 | -0.082  |
| CEU | DEFB130 | 11995962 | 27.0282 | 23.0259 | 0.5446  |
| CEU | DEFB130 | 12000962 | 24.8802 | 19.4441 | 0.8708  |
| CEU | DEFB130 | 12005962 | 12.972  | 11.9394 | 0.2633  |
| CEU | DEFB130 | 12010962 | 3.3288  | 4.4346  | -0.6938 |
| CEU | DEFB130 | 12015962 | 1.0744  | 1.7056  | -0.8645 |
| CEU | DEFB130 | 12020962 | 0.8423  | 1.3645  | -0.8448 |
| CEU | DEFB130 | 12025962 | 1.3502  | 2.2173  | -0.9687 |

## 2\_TajimasD\_data

|     |         |          |         |         |         |
|-----|---------|----------|---------|---------|---------|
| CEU | DEFB130 | 12030962 | 5.7368  | 5.6286  | 0.055   |
| CEU | DEFB130 | 12035962 | 10.7067 | 10.4043 | 0.0877  |
| CEU | DEFB130 | 12040962 | 7.6073  | 8.8692  | -0.4246 |
| CEU | DEFB130 | 12045962 | 1.5102  | 2.729   | -1.152  |
| CEU | DEFB130 | 12050962 | 1.7984  | 2.5584  | -0.7571 |
| CEU | DEFB130 | 12055962 | 4.1903  | 3.5818  | 0.4586  |
| CEU | DEFB130 | 12060962 | 3.2373  | 2.8996  | 0.3037  |
| CEU | DEFB130 | 12065962 | 1.4442  | 1.8762  | -0.55   |
| CEU | DEFB130 | 12070962 | 3.9658  | 3.2407  | 0.5946  |
| CEU | DEFB130 | 12075962 | 4.597   | 3.7524  | 0.6119  |
| CEU | DEFB130 | 12080962 | 4.5234  | 5.6286  | -0.5622 |
| CEU | DEFB130 | 12085962 | 7.9056  | 10.4043 | -0.7249 |
| CEU | DEFB130 | 12090962 | 4.6627  | 6.1402  | -0.6953 |
| CEU | DEFB130 | 12095962 | 0.0101  | 0.1706  | -0.9534 |
| CEU | DEFB130 | 12100962 | 0       | 0       | 0       |
| CEU | DEFB130 | 12105962 | 0       | 0       | 0       |
| CEU | DEFB130 | 12110962 | 0       | 0       | 0       |
| CEU | DEFB130 | 12115962 | 0       | 0       | 0       |
| CEU | DEFB130 | 12120962 | 0       | 0       | 0       |
| CEU | DEFB130 | 12125962 | 0       | 0       | 0       |
| CEU | DEFB130 | 12130962 | 0       | 0       | 0       |
| CEU | DEFB130 | 12135962 | 0       | 0       | 0       |
| CEU | DEFB130 | 12140962 | 3.7271  | 2.3879  | 1.4103  |
| CEU | DEFB130 | 12145962 | 8.221   | 4.7757  | 2.0263  |
| CEU | DEFB130 | 12150962 | 5.242   | 4.0935  | 0.7723  |
| CEU | DEFB130 | 12155962 | 0.7885  | 2.2173  | -1.5962 |
| CEU | DEFB130 | 12160962 | 2.0635  | 1.5351  | 0.7835  |
| CEU | DEFB130 | 12165962 | 4.4679  | 1.8762  | 3.2997  |
| CEU | DEFB130 | 12170962 | 3.4084  | 1.7056  | 2.3322  |
| CEU | DEFB130 | 12175962 | 8.6562  | 6.3108  | 1.0768  |
| CEU | DEFB130 | 12180962 | 17.5106 | 11.9394 | 1.4204  |
| CEU | DEFB130 | 12185962 | 12.3335 | 8.5281  | 1.3278  |
| CEU | DEFB130 | 12190962 | 4.9087  | 4.6052  | 0.1843  |
| CEU | DEFB130 | 12195962 | 4.315   | 4.2641  | 0.033   |
| CEU | DEFB130 | 12200962 | 3.3727  | 2.729   | 0.6084  |
| CEU | DEFB130 | 12205962 | 1.9068  | 1.7056  | 0.2756  |
| CEU | DEFB130 | 12210962 | 1.5191  | 2.0467  | -0.6278 |
| CEU | DEFB130 | 12215962 | 2.4999  | 3.2407  | -0.6074 |
| CEU | DEFB130 | 12220962 | 2.9503  | 3.5818  | -0.476  |
| CEU | DEFB130 | 12225962 | 5.223   | 4.2641  | 0.6225  |
| CEU | DEFB130 | 12230962 | 17.7322 | 14.4978 | 0.6862  |
| CEU | DEFB130 | 12235962 | 28.5182 | 22.8554 | 0.7761  |
| CEU | DEFB130 | 12240962 | 24.0853 | 21.1497 | 0.4336  |
| CEU | DEFB130 | 12245962 | 15.3177 | 15.5212 | -0.0405 |
| CEU | DEFB130 | 12250962 | 7.2461  | 6.8225  | 0.1813  |
| CEU | DEFB130 | 12255962 | 2.4721  | 2.3879  | 0.0887  |
| CEU | DEFB130 | 12260962 | 1.3249  | 1.8762  | -0.7019 |
| CEU | DEFB130 | 12265962 | 0.3913  | 1.3645  | -1.5744 |
| CEU | DEFB130 | 12270962 | 3.1047  | 5.6286  | -1.2838 |

## 2\_TajimasD\_data

|     |         |          |         |         |         |
|-----|---------|----------|---------|---------|---------|
| CEU | DEFB130 | 12275962 | 7.8481  | 9.8926  | -0.6217 |
| CEU | DEFB130 | 12280962 | 8.3212  | 8.3576  | -0.0129 |
| CEU | DEFB130 | 12285962 | 6.2414  | 6.8225  | -0.2487 |
| CEU | DEFB130 | 12290962 | 5.7751  | 5.6286  | 0.0745  |
| CEU | DEFB130 | 12295962 | 4.6052  | 3.7524  | 0.6178  |
| CEU | DEFB130 | 12300962 | 3.5793  | 2.729   | 0.8037  |
| CEU | DEFB130 | 12305962 | 6.4459  | 4.0935  | 1.5818  |
| CEU | DEFB130 | 12310962 | 5.1142  | 4.7757  | 0.1991  |
| CEU | DEFB130 | 12315962 | 0.8314  | 2.5584  | -1.7204 |
| CEU | DEFB130 | 12320962 | 0.424   | 1.5351  | -1.6475 |
| CEU | DEFB130 | 12325962 | 0.8439  | 1.5351  | -1.0249 |
| CEU | DEFB130 | 12330962 | 0.6246  | 0.6822  | -0.1504 |
| CEU | DEFB130 | 12335962 | 2.2412  | 2.0467  | 0.2314  |
| CEU | DEFB130 | 12340962 | 7.2422  | 5.7991  | 0.7148  |
| CEU | DEFB130 | 12345962 | 5.8031  | 4.7757  | 0.6043  |
| CEU | DEFB130 | 12350962 | 1.4568  | 1.8762  | -0.534  |
| CEU | DEFB130 | 12355962 | 1.2288  | 1.8762  | -0.8242 |
| CEU | DEFB130 | 12360962 | 0.7681  | 1.7056  | -1.284  |
| CEU | DEFB130 | 12365962 | 0.361   | 1.7056  | -1.8416 |
| CEU | DEFB130 | 12370962 | 1.3474  | 2.2173  | -0.9718 |
| CEU | DEFB130 | 12375962 | 3.2787  | 3.7524  | -0.3432 |
| CEU | DEFB130 | 12380962 | 3.1938  | 3.9229  | -0.5085 |
| CEU | DEFB130 | 12385962 | 2.2827  | 2.5584  | -0.2746 |
| CEU | DEFB130 | 12390962 | 4.0619  | 2.2173  | 2.0608  |
| CEU | DEFB130 | 12395962 | 6.428   | 4.4346  | 1.2507  |
| CEU | DEFB130 | 12400962 | 9.9645  | 6.8225  | 1.3445  |
| CEU | DEFB130 | 12405962 | 10.4463 | 6.1402  | 2.0263  |
| CEU | DEFB130 | 12410962 | 5.4989  | 3.9229  | 1.0992  |
| CEU | DEFB130 | 12415962 | 7.2964  | 4.6052  | 1.6339  |
| CEU | DEFB130 | 12420962 | 10.3267 | 7.1636  | 1.2948  |
| CEU | DEFB130 | 12425962 | 7.8215  | 6.4814  | 0.6007  |
| CEU | DEFB130 | 12430962 | 6.3696  | 5.1169  | 0.6934  |
| CEU | DEFB130 | 12435962 | 6.9586  | 6.8225  | 0.0582  |
| CEU | DEFB130 | 12440962 | 6.0807  | 6.4814  | -0.1796 |
| CEU | DEFB130 | 12445962 | 4.5635  | 5.458   | -0.4676 |
| CEU | DEFB130 | 12450962 | 6.4418  | 7.1636  | -0.2955 |
| CEU | DEFB130 | 12455962 | 5.8716  | 5.9697  | -0.0473 |
| CEU | DEFB130 | 12460962 | 1.8108  | 2.2173  | -0.4541 |
| CEU | DEFB130 | 12465962 | 6.4168  | 6.8225  | -0.1736 |
| CEU | DEFB130 | 12470962 | 16.1722 | 14.4978 | 0.3552  |
| CEU | DEFB130 | 12475962 | 18.5016 | 16.374  | 0.4019  |
| CEU | DEFB130 | 12480962 | 18.7396 | 19.9558 | -0.19   |
| CEU | DEFB130 | 12485962 | 22.1435 | 20.1264 | 0.3126  |
| CEU | DEFB130 | 12490962 | 23.9787 | 19.6147 | 0.6932  |
| CEU | DEFB130 | 12495962 | 21.6099 | 20.4675 | 0.1742  |
| CEU | DEFB130 | 12500962 | 19.5207 | 16.7151 | 0.5196  |
| CEU | DEFB130 | 12505962 | 17.9182 | 16.374  | 0.2917  |
| CEU | DEFB130 | 12510962 | 20.0909 | 17.9091 | 0.3782  |
| CEU | DEFB130 | 12515962 | 21.282  | 19.6147 | 0.2648  |

## 2\_TajimasD\_data

|     |         |          |         |         |         |
|-----|---------|----------|---------|---------|---------|
| CEU | DEFB130 | 12520962 | 17.0551 | 20.6381 | -0.5419 |
| CEU | DEFB130 | 12525962 | 17.1038 | 18.2502 | -0.1952 |
| CEU | DEFB130 | 12530962 | 23.1802 | 19.4441 | 0.5985  |
| CEU | DEFB130 | 12535962 | 27.4199 | 20.6381 | 1.0257  |
| CEU | DEFB130 | 12540962 | 27.0635 | 20.1264 | 1.0749  |
| CEU | DEFB130 | 12545962 | 20.8351 | 23.3671 | -0.3396 |
| CEU | DEFB130 | 12550962 | 11.9546 | 20.1264 | -1.2663 |
| CEU | DEFB130 | 12555962 | 8.7165  | 16.2034 | -1.4285 |
| CEU | DEFB130 | 12560962 | 6.4101  | 14.1567 | -1.6811 |
| CEU | DEFB130 | 12565962 | 7.6744  | 18.0796 | -1.7876 |
| CEU | DEFB130 | 12570962 | 10.781  | 20.6381 | -1.4909 |
| CEU | DEFB130 | 12575962 | 8.1408  | 12.6216 | -1.0841 |
| CEU | DEFB130 | 12580962 | 6.3496  | 9.0398  | -0.8894 |
| CEU | DEFB130 | 12585962 | 7.0936  | 8.5281  | -0.5005 |
| CEU | DEFB130 | 12590962 | 5.6926  | 8.8692  | -1.0689 |
| CEU | DEFB130 | 12595962 | 4.8477  | 10.2337 | -1.5868 |
| CEU | DEFB130 | 12600962 | 9.3243  | 14.4978 | -1.0976 |
| CEU | DEFB130 | 12605962 | 9.3676  | 13.4744 | -0.934  |
| CEU | DEFB130 | 12610962 | 5.8839  | 9.2104  | -1.0809 |
| CEU | DEFB130 | 12615962 | 9.9676  | 10.4043 | -0.1267 |
| CEU | DEFB130 | 12620962 | 11.874  | 9.5515  | 0.7296  |
| CEU | DEFB130 | 12625962 | 18.1086 | 10.4043 | 2.235   |
| CEU | DEFB130 | 12630962 | 22.632  | 13.4744 | 2.0826  |
| CEU | DEFB130 | 12635962 | 18.858  | 12.2805 | 1.633   |
| CEU | DEFB130 | 12640962 | 18.182  | 11.2571 | 1.866   |
| CEU | DEFB130 | 12645962 | 14.4649 | 10.5749 | 1.1114  |
| CEU | DEFB130 | 12650962 | 11.0676 | 9.5515  | 0.4763  |
| CEU | DEFB130 | 12655962 | 10.5531 | 10.2337 | 0.0941  |
| CEU | DEFB130 | 12660962 | 14.1579 | 12.7922 | 0.3262  |
| CEU | DEFB130 | 12665962 | 13.76   | 12.1099 | 0.4151  |
| CEU | DEFB130 | 12670962 | 11.234  | 11.9394 | -0.1798 |
| CEU | DEFB130 | 12675962 | 12.2373 | 12.4511 | -0.0524 |
| CEU | DEFB130 | 12680962 | 13.2249 | 12.2805 | 0.2345  |
| CEU | DEFB130 | 12685962 | 16.9219 | 15.3506 | 0.3157  |
| CEU | DEFB130 | 12690962 | 16.9853 | 15.5212 | 0.2911  |
| CEU | DEFB130 | 12695962 | 11.8366 | 14.6684 | -0.5941 |
| CEU | DEFB130 | 12700962 | 13.4073 | 16.7151 | -0.6127 |
| CEU | DEFB130 | 12705962 | 14.8786 | 15.6917 | -0.16   |
| CEU | DEFB130 | 12710962 | 13.5382 | 16.0329 | -0.4808 |
| CEU | DEFB130 | 12715962 | 13.7551 | 16.374  | -0.4947 |
| CEU | DEFB130 | 12720962 | 10.3647 | 12.6216 | -0.546  |
| CEU | DEFB130 | 12725962 | 8.4317  | 11.7688 | -0.8624 |
| CEU | DEFB130 | 12730962 | 8.4244  | 11.9394 | -0.8962 |
| CEU | DEFB130 | 12735962 | 9.2834  | 12.6216 | -0.8076 |
| CEU | DEFB130 | 12740962 | 9.8637  | 13.3039 | -0.7919 |
| CEU | DEFB130 | 12745962 | 9.9002  | 14.4978 | -0.9754 |
| CEU | DEFB130 | 12750962 | 8.5199  | 13.8156 | -1.1761 |
| CEU | DEFB130 | 12755962 | 7.51    | 11.9394 | -1.1293 |
| CEU | DEFB130 | 12760962 | 11.2336 | 12.9627 | -0.4079 |

## 2\_TajimasD\_data

|     |         |          |         |         |         |
|-----|---------|----------|---------|---------|---------|
| CEU | DEFB130 | 12765962 | 12.9058 | 13.645  | -0.1661 |
| CEU | DEFB130 | 12770962 | 11.3459 | 12.4511 | -0.2708 |
| CEU | DEFB130 | 12775962 | 11.3958 | 11.9394 | -0.1386 |
| CEU | DEFB130 | 12780962 | 10.8732 | 11.7688 | -0.2315 |
| CEU | DEFB130 | 12785962 | 13.1016 | 11.7688 | 0.3444  |
| CEU | DEFB130 | 12790962 | 16.2509 | 14.3272 | 0.4127  |
| CEU | DEFB130 | 12795962 | 16.2731 | 14.3272 | 0.4175  |
| CEU | DEFB130 | 12800962 | 13.068  | 10.7454 | 0.6537  |
| CEU | DEFB130 | 12805962 | 13.6675 | 11.9394 | 0.4406  |
| CEU | DEFB130 | 12810962 | 15.6801 | 15.0095 | 0.1376  |
| CHB | DEFB130 | 11815962 | 19.6371 | 17.1109 | 0.4562  |
| CHB | DEFB130 | 11820962 | 18.6793 | 16.0944 | 0.495   |
| CHB | DEFB130 | 11825962 | 14.1447 | 17.4498 | -0.5858 |
| CHB | DEFB130 | 11830962 | 7.3889  | 14.9085 | -1.549  |
| CHB | DEFB130 | 11835962 | 5.347   | 15.0779 | -1.9831 |
| CHB | DEFB130 | 11840962 | 4.0235  | 15.2474 | -2.2631 |
| CHB | DEFB130 | 11845962 | 3.6565  | 11.6896 | -2.0832 |
| CHB | DEFB130 | 11850962 | 4.8086  | 10.8426 | -1.6793 |
| CHB | DEFB130 | 11855962 | 5.3146  | 14.2309 | -1.9198 |
| CHB | DEFB130 | 11860962 | 5.347   | 17.2803 | -2.1348 |
| CHB | DEFB130 | 11865962 | 4.853   | 19.991  | -2.3543 |
| CHB | DEFB130 | 11870962 | 7.0047  | 26.2593 | -2.2998 |
| CHB | DEFB130 | 11875962 | 6.8783  | 27.4452 | -2.3533 |
| CHB | DEFB130 | 11880962 | 4.7274  | 26.937  | -2.5879 |
| CHB | DEFB130 | 11885962 | 5.2223  | 26.4288 | -2.5172 |
| CHB | DEFB130 | 11890962 | 7.1035  | 28.6311 | -2.3638 |
| CHB | DEFB130 | 11895962 | 4.7876  | 20.4992 | -2.3851 |
| CHB | DEFB130 | 11900962 | 0.9998  | 6.2684  | -2.4265 |
| CHB | DEFB130 | 11905962 | 0.9526  | 4.913   | -2.2653 |
| CHB | DEFB130 | 11910962 | 0.7834  | 3.7271  | -2.1385 |
| CHB | DEFB130 | 11915962 | 1.2022  | 6.7766  | -2.3929 |
| CHB | DEFB130 | 11920962 | 1.3061  | 6.946   | -2.3674 |
| CHB | DEFB130 | 11925962 | 1.0685  | 3.5577  | -1.8812 |
| CHB | DEFB130 | 11930962 | 1.0402  | 3.0495  | -1.728  |
| CHB | DEFB130 | 11935962 | 0.7489  | 1.5247  | -1.1526 |
| CHB | DEFB130 | 11940962 | 0.3385  | 0.3388  | -0.0012 |
| CHB | DEFB130 | 11945962 | 1.5142  | 2.2024  | -0.7706 |
| CHB | DEFB130 | 11950962 | 5       | 3.5577  | 1.09    |
| CHB | DEFB130 | 11955962 | 4.0259  | 1.8636  | 2.7588  |
| CHB | DEFB130 | 11960962 | 1.0853  | 1.3553  | -0.4376 |
| CHB | DEFB130 | 11965962 | 1.6128  | 1.5247  | 0.1309  |
| CHB | DEFB130 | 11970962 | 4.1494  | 2.2024  | 2.1801  |
| CHB | DEFB130 | 11975962 | 10.858  | 7.1154  | 1.537   |
| CHB | DEFB130 | 11980962 | 11.4651 | 10.8426 | 0.1732  |
| CHB | DEFB130 | 11985962 | 11.3908 | 16.9415 | -1.012  |
| CHB | DEFB130 | 11990962 | 17.9813 | 23.2099 | -0.704  |
| CHB | DEFB130 | 11995962 | 25.0773 | 23.5487 | 0.2029  |
| CHB | DEFB130 | 12000962 | 24.2136 | 18.6357 | 0.9281  |
| CHB | DEFB130 | 12005962 | 11.9918 | 11.012  | 0.2687  |



## 2\_TajimasD\_data

|     |         |          |         |         |         |
|-----|---------|----------|---------|---------|---------|
| CHB | DEFB130 | 12010962 | 2.9027  | 6.0989  | -1.5087 |
| CHB | DEFB130 | 12015962 | 1.3078  | 2.8801  | -1.4176 |
| CHB | DEFB130 | 12020962 | 0.9909  | 1.3553  | -0.5906 |
| CHB | DEFB130 | 12025962 | 0.4647  | 2.5412  | -2.0735 |
| CHB | DEFB130 | 12030962 | 4.2816  | 7.2848  | -1.2072 |
| CHB | DEFB130 | 12035962 | 9.944   | 10.3343 | -0.1136 |
| CHB | DEFB130 | 12040962 | 7.9286  | 8.4708  | -0.1898 |
| CHB | DEFB130 | 12045962 | 1.8791  | 4.066   | -1.4747 |
| CHB | DEFB130 | 12050962 | 1.2404  | 2.8801  | -1.4784 |
| CHB | DEFB130 | 12055962 | 3.1917  | 3.5577  | -0.2766 |
| CHB | DEFB130 | 12060962 | 2.6794  | 2.5412  | 0.138   |
| CHB | DEFB130 | 12065962 | 1.1649  | 1.0165  | 0.2953  |
| CHB | DEFB130 | 12070962 | 3.9591  | 3.0495  | 0.7823  |
| CHB | DEFB130 | 12075962 | 4.3202  | 3.8965  | 0.2963  |
| CHB | DEFB130 | 12080962 | 2.2633  | 5.2519  | -1.6118 |
| CHB | DEFB130 | 12085962 | 3.2734  | 13.2144 | -2.2963 |
| CHB | DEFB130 | 12090962 | 1.8856  | 9.1484  | -2.368  |
| CHB | DEFB130 | 12095962 | 0.0097  | 0.1694  | -0.949  |
| CHB | DEFB130 | 12100962 | 0       | 0       | 0       |
| CHB | DEFB130 | 12105962 | 0       | 0       | 0       |
| CHB | DEFB130 | 12110962 | 0       | 0       | 0       |
| CHB | DEFB130 | 12115962 | 0       | 0       | 0       |
| CHB | DEFB130 | 12120962 | 0       | 0       | 0       |
| CHB | DEFB130 | 12125962 | 0       | 0       | 0       |
| CHB | DEFB130 | 12130962 | 0       | 0       | 0       |
| CHB | DEFB130 | 12135962 | 0       | 0       | 0       |
| CHB | DEFB130 | 12140962 | 0.5926  | 3.3883  | -2.2017 |
| CHB | DEFB130 | 12145962 | 1.4443  | 6.2684  | -2.2218 |
| CHB | DEFB130 | 12150962 | 1.5222  | 4.4048  | -1.8139 |
| CHB | DEFB130 | 12155962 | 0.7367  | 1.6942  | -1.3141 |
| CHB | DEFB130 | 12160962 | 0.7401  | 2.8801  | -1.9294 |
| CHB | DEFB130 | 12165962 | 1.2745  | 4.2354  | -1.9276 |
| CHB | DEFB130 | 12170962 | 1.4809  | 3.3883  | -1.5021 |
| CHB | DEFB130 | 12175962 | 2.5553  | 9.3178  | -2.1676 |
| CHB | DEFB130 | 12180962 | 3.554   | 16.9415 | -2.4408 |
| CHB | DEFB130 | 12185962 | 2.5915  | 12.0285 | -2.3824 |
| CHB | DEFB130 | 12190962 | 1.1609  | 5.7601  | -2.285  |
| CHB | DEFB130 | 12195962 | 1.4407  | 5.0825  | -2.0219 |
| CHB | DEFB130 | 12200962 | 1.2751  | 2.5412  | -1.2643 |
| CHB | DEFB130 | 12205962 | 0.3021  | 1.0165  | -1.4217 |
| CHB | DEFB130 | 12210962 | 0.5543  | 1.0165  | -0.9198 |
| CHB | DEFB130 | 12215962 | 0.9425  | 2.7106  | -1.6754 |
| CHB | DEFB130 | 12220962 | 0.6745  | 3.7271  | -2.2176 |
| CHB | DEFB130 | 12225962 | 0.6387  | 4.5742  | -2.3964 |
| CHB | DEFB130 | 12230962 | 8.004   | 13.892  | -1.2971 |
| CHB | DEFB130 | 12235962 | 18.3499 | 22.1934 | -0.5404 |
| CHB | DEFB130 | 12240962 | 18.2166 | 21.3463 | -0.4569 |
| CHB | DEFB130 | 12245962 | 11.0114 | 15.0779 | -0.8287 |
| CHB | DEFB130 | 12250962 | 4.4782  | 6.7766  | -0.9866 |

## 2\_TajimasD\_data

|     |         |          |         |         |         |
|-----|---------|----------|---------|---------|---------|
| CHB | DEFB130 | 12255962 | 1.8296  | 2.7106  | -0.8348 |
| CHB | DEFB130 | 12260962 | 1.2509  | 1.5247  | -0.4068 |
| CHB | DEFB130 | 12265962 | 0.3967  | 0.8471  | -1.0156 |
| CHB | DEFB130 | 12270962 | 2.6617  | 4.5742  | -1.1646 |
| CHB | DEFB130 | 12275962 | 6.9346  | 8.979   | -0.6782 |
| CHB | DEFB130 | 12280962 | 8.204   | 8.3013  | -0.0347 |
| CHB | DEFB130 | 12285962 | 6.8268  | 6.4378  | 0.1749  |
| CHB | DEFB130 | 12290962 | 4.3076  | 4.5742  | -0.1623 |
| CHB | DEFB130 | 12295962 | 2.478   | 3.3883  | -0.7169 |
| CHB | DEFB130 | 12300962 | 2.8144  | 2.7106  | 0.0984  |
| CHB | DEFB130 | 12305962 | 5.7339  | 3.7271  | 1.4579  |
| CHB | DEFB130 | 12310962 | 4.7716  | 3.3883  | 1.0894  |
| CHB | DEFB130 | 12315962 | 0.9612  | 1.0165  | -0.1101 |
| CHB | DEFB130 | 12320962 | 0.4814  | 1.0165  | -1.0649 |
| CHB | DEFB130 | 12325962 | 0.7974  | 1.1859  | -0.6935 |
| CHB | DEFB130 | 12330962 | 0.5494  | 1.1859  | -1.1361 |
| CHB | DEFB130 | 12335962 | 2.657   | 2.8801  | -0.2011 |
| CHB | DEFB130 | 12340962 | 6.7843  | 6.6072  | 0.0778  |
| CHB | DEFB130 | 12345962 | 4.4693  | 5.0825  | -0.3404 |
| CHB | DEFB130 | 12350962 | 1.4455  | 2.033   | -0.7006 |
| CHB | DEFB130 | 12355962 | 1.3878  | 2.7106  | -1.2534 |
| CHB | DEFB130 | 12360962 | 0.831   | 2.2024  | -1.5356 |
| CHB | DEFB130 | 12365962 | 0.605   | 1.1859  | -1.0369 |
| CHB | DEFB130 | 12370962 | 1.3579  | 1.1859  | 0.307   |
| CHB | DEFB130 | 12375962 | 3.3503  | 2.8801  | 0.4239  |
| CHB | DEFB130 | 12380962 | 3.0723  | 3.3883  | -0.2489 |
| CHB | DEFB130 | 12385962 | 2.1939  | 2.7106  | -0.4896 |
| CHB | DEFB130 | 12390962 | 3.5969  | 2.5412  | 1.0542  |
| CHB | DEFB130 | 12395962 | 5.8768  | 5.4213  | 0.2389  |
| CHB | DEFB130 | 12400962 | 9.6107  | 7.6237  | 0.7662  |
| CHB | DEFB130 | 12405962 | 9.9684  | 6.2684  | 1.7041  |
| CHB | DEFB130 | 12410962 | 5.2947  | 4.4048  | 0.56    |
| CHB | DEFB130 | 12415962 | 6.699   | 5.7601  | 0.4665  |
| CHB | DEFB130 | 12420962 | 9.4194  | 8.3013  | 0.3988  |
| CHB | DEFB130 | 12425962 | 7.7717  | 8.6402  | -0.2985 |
| CHB | DEFB130 | 12430962 | 6.6014  | 7.7931  | -0.4504 |
| CHB | DEFB130 | 12435962 | 6.9602  | 8.3013  | -0.4783 |
| CHB | DEFB130 | 12440962 | 6.206   | 7.1154  | -0.3735 |
| CHB | DEFB130 | 12445962 | 4.6362  | 4.7436  | -0.0634 |
| CHB | DEFB130 | 12450962 | 6.9353  | 6.0989  | 0.3948  |
| CHB | DEFB130 | 12455962 | 6.0798  | 5.7601  | 0.1588  |
| CHB | DEFB130 | 12460962 | 1.5281  | 2.7106  | -1.1205 |
| CHB | DEFB130 | 12465962 | 5.8035  | 7.1154  | -0.5388 |
| CHB | DEFB130 | 12470962 | 14.5489 | 15.5862 | -0.2048 |
| CHB | DEFB130 | 12475962 | 15.6677 | 20.1604 | -0.6931 |
| CHB | DEFB130 | 12480962 | 16.0215 | 26.7676 | -1.2598 |
| CHB | DEFB130 | 12485962 | 19.3908 | 29.8171 | -1.1005 |
| CHB | DEFB130 | 12490962 | 21.8424 | 29.4782 | -0.815  |
| CHB | DEFB130 | 12495962 | 21.6973 | 30.3253 | -0.8958 |

## 2\_TajimasD\_data

|     |         |          |         |         |         |
|-----|---------|----------|---------|---------|---------|
| CHB | DEFB130 | 12500962 | 18.9918 | 27.4452 | -0.9672 |
| CHB | DEFB130 | 12505962 | 18.3602 | 27.1064 | -1.0129 |
| CHB | DEFB130 | 12510962 | 23.0899 | 31.003  | -0.804  |
| CHB | DEFB130 | 12515962 | 23.9733 | 29.9865 | -0.6312 |
| CHB | DEFB130 | 12520962 | 20.6063 | 31.6806 | -1.1017 |
| CHB | DEFB130 | 12525962 | 21.2412 | 32.3583 | -1.0834 |
| CHB | DEFB130 | 12530962 | 26.1336 | 29.8171 | -0.3888 |
| CHB | DEFB130 | 12535962 | 30.4138 | 29.8171 | 0.063   |
| CHB | DEFB130 | 12540962 | 30.6753 | 33.7136 | -0.2844 |
| CHB | DEFB130 | 12545962 | 25.3394 | 33.7136 | -0.784  |
| CHB | DEFB130 | 12550962 | 16.3147 | 25.4123 | -1.1218 |
| CHB | DEFB130 | 12555962 | 9.505   | 24.2264 | -1.9014 |
| CHB | DEFB130 | 12560962 | 6.1407  | 24.904  | -2.3595 |
| CHB | DEFB130 | 12565962 | 8.3935  | 28.6311 | -2.2222 |
| CHB | DEFB130 | 12570962 | 11.0946 | 26.4288 | -1.8201 |
| CHB | DEFB130 | 12575962 | 7.9614  | 16.4333 | -1.5903 |
| CHB | DEFB130 | 12580962 | 4.895   | 14.2309 | -2.0102 |
| CHB | DEFB130 | 12585962 | 6.0385  | 13.045  | -1.6384 |
| CHB | DEFB130 | 12590962 | 6.1622  | 11.3508 | -1.3833 |
| CHB | DEFB130 | 12595962 | 4.5854  | 12.3673 | -1.9137 |
| CHB | DEFB130 | 12600962 | 6.7955  | 15.7556 | -1.751  |
| CHB | DEFB130 | 12605962 | 7.2539  | 15.0779 | -1.5945 |
| CHB | DEFB130 | 12610962 | 4.1085  | 10.5037 | -1.8335 |
| CHB | DEFB130 | 12615962 | 7.333   | 10.3343 | -0.8736 |
| CHB | DEFB130 | 12620962 | 9.1038  | 10.6731 | -0.4432 |
| CHB | DEFB130 | 12625962 | 15.6149 | 14.0615 | 0.3383  |
| CHB | DEFB130 | 12630962 | 23.1483 | 16.6027 | 1.2167  |
| CHB | DEFB130 | 12635962 | 20.9585 | 15.5862 | 1.0608  |
| CHB | DEFB130 | 12640962 | 17.4148 | 13.5532 | 0.8709  |
| CHB | DEFB130 | 12645962 | 12.1264 | 10.3343 | 0.5217  |
| CHB | DEFB130 | 12650962 | 9.2427  | 11.5202 | -0.5988 |
| CHB | DEFB130 | 12655962 | 9.3923  | 15.0779 | -1.1587 |
| CHB | DEFB130 | 12660962 | 13.7068 | 15.7556 | -0.4004 |
| CHB | DEFB130 | 12665962 | 13.7044 | 14.2309 | -0.1134 |
| CHB | DEFB130 | 12670962 | 11.5387 | 14.0615 | -0.5494 |
| CHB | DEFB130 | 12675962 | 13.4363 | 14.2309 | -0.1711 |
| CHB | DEFB130 | 12680962 | 13.901  | 14.7391 | -0.1745 |
| CHB | DEFB130 | 12685962 | 17.1354 | 16.6027 | 0.099   |
| CHB | DEFB130 | 12690962 | 17.5636 | 16.9415 | 0.1134  |
| CHB | DEFB130 | 12695962 | 11.7437 | 15.7556 | -0.784  |
| CHB | DEFB130 | 12700962 | 13.1397 | 17.7886 | -0.8089 |
| CHB | DEFB130 | 12705962 | 15.3484 | 16.4333 | -0.2037 |
| CHB | DEFB130 | 12710962 | 13.8643 | 14.7391 | -0.1822 |
| CHB | DEFB130 | 12715962 | 12.5106 | 16.0944 | -0.6863 |
| CHB | DEFB130 | 12720962 | 8.4763  | 13.7226 | -1.1693 |
| CHB | DEFB130 | 12725962 | 7.7607  | 10.1649 | -0.7107 |
| CHB | DEFB130 | 12730962 | 10.8233 | 9.9955  | 0.2486  |
| CHB | DEFB130 | 12735962 | 12.2269 | 13.5532 | -0.2991 |
| CHB | DEFB130 | 12740962 | 12.3708 | 13.892  | -0.3351 |

## 2\_TajimasD\_data

|     |         |          |         |         |         |
|-----|---------|----------|---------|---------|---------|
| CHB | DEFB130 | 12745962 | 13.973  | 12.8755 | 0.2598  |
| CHB | DEFB130 | 12750962 | 13.7392 | 13.7226 | 0.0037  |
| CHB | DEFB130 | 12755962 | 12.3352 | 13.892  | -0.343  |
| CHB | DEFB130 | 12760962 | 14.1785 | 14.9085 | -0.1504 |
| CHB | DEFB130 | 12765962 | 20.0572 | 14.5697 | 1.1554  |
| CHB | DEFB130 | 12770962 | 16.5047 | 12.7061 | 0.9106  |
| CHB | DEFB130 | 12775962 | 10.5111 | 11.1814 | -0.1812 |
| CHB | DEFB130 | 12780962 | 10.9884 | 9.1484  | 0.5999  |
| CHB | DEFB130 | 12785962 | 13.916  | 10.5037 | 0.9783  |
| CHB | DEFB130 | 12790962 | 15.4959 | 14.5697 | 0.195   |
| CHB | DEFB130 | 12795962 | 12.0992 | 13.5532 | -0.3279 |
| CHB | DEFB130 | 12800962 | 9.1032  | 12.0285 | -0.7385 |
| CHB | DEFB130 | 12805962 | 10.9768 | 13.892  | -0.6422 |
| CHB | DEFB130 | 12810962 | 14.2006 | 14.0615 | 0.0303  |
| YRI | DEFB130 | 11815962 | 23.3406 | 23.8648 | -0.0685 |
| YRI | DEFB130 | 11820962 | 23.2688 | 20.8397 | 0.3617  |
| YRI | DEFB130 | 11825962 | 24.9336 | 24.5371 | 0.0504  |
| YRI | DEFB130 | 11830962 | 19.1198 | 22.3523 | -0.4498 |
| YRI | DEFB130 | 11835962 | 18.3635 | 20.1675 | -0.2773 |
| YRI | DEFB130 | 11840962 | 19.3058 | 21.68   | -0.3403 |
| YRI | DEFB130 | 11845962 | 16.2621 | 18.6549 | -0.3964 |
| YRI | DEFB130 | 11850962 | 15.3123 | 18.3188 | -0.5069 |
| YRI | DEFB130 | 11855962 | 16.7315 | 20.3355 | -0.5495 |
| YRI | DEFB130 | 11860962 | 20.2536 | 25.5455 | -0.6471 |
| YRI | DEFB130 | 11865962 | 22.7388 | 34.6208 | -1.0803 |
| YRI | DEFB130 | 11870962 | 30.3784 | 45.5449 | -1.0537 |
| YRI | DEFB130 | 11875962 | 29.616  | 42.8559 | -0.9765 |
| YRI | DEFB130 | 11880962 | 23.494  | 34.4528 | -1.0011 |
| YRI | DEFB130 | 11885962 | 29.4925 | 36.6376 | -0.6146 |
| YRI | DEFB130 | 11890962 | 36.4933 | 38.6543 | -0.1764 |
| YRI | DEFB130 | 11895962 | 24.7764 | 27.058  | -0.2638 |
| YRI | DEFB130 | 11900962 | 10.3597 | 11.0921 | -0.1989 |
| YRI | DEFB130 | 11905962 | 7.9868  | 7.3947  | 0.234   |
| YRI | DEFB130 | 11910962 | 4.6056  | 7.0586  | -1.0112 |
| YRI | DEFB130 | 11915962 | 9.7048  | 9.4115  | 0.0928  |
| YRI | DEFB130 | 11920962 | 9.0643  | 8.235   | 0.2969  |
| YRI | DEFB130 | 11925962 | 3.2347  | 4.7057  | -0.8708 |
| YRI | DEFB130 | 11930962 | 5.1416  | 5.5461  | -0.2071 |
| YRI | DEFB130 | 11935962 | 4.6448  | 4.7057  | -0.0361 |
| YRI | DEFB130 | 11940962 | 1.5432  | 2.0167  | -0.5661 |
| YRI | DEFB130 | 11945962 | 4.6986  | 3.5293  | 0.8866  |
| YRI | DEFB130 | 11950962 | 7.0151  | 5.8822  | 0.5505  |
| YRI | DEFB130 | 11955962 | 3.3596  | 3.8654  | -0.3549 |
| YRI | DEFB130 | 11960962 | 1.5046  | 2.3529  | -0.898  |
| YRI | DEFB130 | 11965962 | 1.1437  | 2.1848  | -1.1689 |
| YRI | DEFB130 | 11970962 | 3.7917  | 4.5377  | -0.4558 |
| YRI | DEFB130 | 11975962 | 11.3523 | 11.4282 | -0.02   |
| YRI | DEFB130 | 11980962 | 12.8622 | 16.302  | -0.6485 |
| YRI | DEFB130 | 11985962 | 19.0227 | 25.8816 | -0.8281 |

## 2\_TajimasD\_data

|     |         |          |         |         |         |
|-----|---------|----------|---------|---------|---------|
| YRI | DEFB130 | 11990962 | 28.3129 | 37.4779 | -0.771  |
| YRI | DEFB130 | 11995962 | 29.693  | 36.4695 | -0.5855 |
| YRI | DEFB130 | 12000962 | 24.5777 | 30.0831 | -0.5741 |
| YRI | DEFB130 | 12005962 | 13.398  | 18.1507 | -0.8084 |
| YRI | DEFB130 | 12010962 | 6.0813  | 7.2267  | -0.4622 |
| YRI | DEFB130 | 12015962 | 2.6055  | 4.2016  | -1.0426 |
| YRI | DEFB130 | 12020962 | 1.3506  | 2.1848  | -0.9366 |
| YRI | DEFB130 | 12025962 | 2.122   | 4.0335  | -1.2933 |
| YRI | DEFB130 | 12030962 | 6.8519  | 9.5795  | -0.8492 |
| YRI | DEFB130 | 12035962 | 12.6282 | 13.613  | -0.2204 |
| YRI | DEFB130 | 12040962 | 11.8381 | 12.1005 | -0.0656 |
| YRI | DEFB130 | 12045962 | 4.8957  | 6.3864  | -0.6728 |
| YRI | DEFB130 | 12050962 | 3.3527  | 6.0502  | -1.2781 |
| YRI | DEFB130 | 12055962 | 5.3287  | 6.3864  | -0.4774 |
| YRI | DEFB130 | 12060962 | 3.6704  | 5.8822  | -1.0747 |
| YRI | DEFB130 | 12065962 | 1.559   | 4.3696  | -1.7747 |
| YRI | DEFB130 | 12070962 | 3.5745  | 3.6974  | -0.0896 |
| YRI | DEFB130 | 12075962 | 4.2847  | 3.8654  | 0.2942  |
| YRI | DEFB130 | 12080962 | 8.5128  | 8.9073  | -0.1314 |
| YRI | DEFB130 | 12085962 | 21.7265 | 25.2093 | -0.4314 |
| YRI | DEFB130 | 12090962 | 14.6926 | 17.6465 | -0.5162 |
| YRI | DEFB130 | 12095962 | 0.1802  | 0.5042  | -1.0182 |
| YRI | DEFB130 | 12100962 | 0       | 0       | 0       |
| YRI | DEFB130 | 12105962 | 0       | 0       | 0       |
| YRI | DEFB130 | 12110962 | 0       | 0       | 0       |
| YRI | DEFB130 | 12115962 | 0       | 0       | 0       |
| YRI | DEFB130 | 12120962 | 0       | 0       | 0       |
| YRI | DEFB130 | 12125962 | 0       | 0       | 0       |
| YRI | DEFB130 | 12130962 | 0       | 0       | 0       |
| YRI | DEFB130 | 12135962 | 0       | 0       | 0       |
| YRI | DEFB130 | 12140962 | 4.9144  | 4.8738  | 0.0233  |
| YRI | DEFB130 | 12145962 | 11.4207 | 9.0754  | 0.7677  |
| YRI | DEFB130 | 12150962 | 8.1069  | 6.5544  | 0.6845  |
| YRI | DEFB130 | 12155962 | 2.4465  | 3.5293  | -0.821  |
| YRI | DEFB130 | 12160962 | 5.5174  | 3.8654  | 1.1593  |
| YRI | DEFB130 | 12165962 | 7.5804  | 4.7057  | 1.7017  |
| YRI | DEFB130 | 12170962 | 3.9683  | 4.2016  | -0.1524 |
| YRI | DEFB130 | 12175962 | 12.0405 | 14.2853 | -0.48   |
| YRI | DEFB130 | 12180962 | 18.2294 | 22.8565 | -0.6302 |
| YRI | DEFB130 | 12185962 | 10.4749 | 15.2937 | -0.9655 |
| YRI | DEFB130 | 12190962 | 6.7929  | 8.5712  | -0.6137 |
| YRI | DEFB130 | 12195962 | 5.3633  | 6.7225  | -0.5857 |
| YRI | DEFB130 | 12200962 | 3.3629  | 4.8738  | -0.8673 |
| YRI | DEFB130 | 12205962 | 2.2375  | 2.8571  | -0.5603 |
| YRI | DEFB130 | 12210962 | 1.8062  | 2.8571  | -0.9504 |
| YRI | DEFB130 | 12215962 | 4.2002  | 5.2099  | -0.5465 |
| YRI | DEFB130 | 12220962 | 5.8557  | 6.3864  | -0.2395 |
| YRI | DEFB130 | 12225962 | 7.8738  | 7.5628  | 0.1204  |
| YRI | DEFB130 | 12230962 | 25.6553 | 23.6968 | 0.2576  |

## 2\_TajimasD\_data

|     |         |          |         |         |         |
|-----|---------|----------|---------|---------|---------|
| YRI | DEFB130 | 12235962 | 39.3353 | 39.3266 | 0.0007  |
| YRI | DEFB130 | 12240962 | 30.6039 | 34.1166 | -0.324  |
| YRI | DEFB130 | 12245962 | 20.6286 | 24.8732 | -0.5326 |
| YRI | DEFB130 | 12250962 | 11.8287 | 13.2769 | -0.3319 |
| YRI | DEFB130 | 12255962 | 3.8087  | 5.2099  | -0.7584 |
| YRI | DEFB130 | 12260962 | 1.8086  | 3.8654  | -1.4434 |
| YRI | DEFB130 | 12265962 | 1.406   | 2.8571  | -1.3123 |
| YRI | DEFB130 | 12270962 | 5.857   | 9.5795  | -1.1589 |
| YRI | DEFB130 | 12275962 | 11.1243 | 16.134  | -0.9538 |
| YRI | DEFB130 | 12280962 | 12.3559 | 12.7727 | -0.0991 |
| YRI | DEFB130 | 12285962 | 10.9995 | 10.756  | 0.068   |
| YRI | DEFB130 | 12290962 | 7.2922  | 9.4115  | -0.6707 |
| YRI | DEFB130 | 12295962 | 4.4919  | 6.2183  | -0.7981 |
| YRI | DEFB130 | 12300962 | 3.2467  | 4.8738  | -0.934  |
| YRI | DEFB130 | 12305962 | 6.7325  | 6.2183  | 0.2377  |
| YRI | DEFB130 | 12310962 | 5.9567  | 7.5628  | -0.6218 |
| YRI | DEFB130 | 12315962 | 1.446   | 3.6974  | -1.641  |
| YRI | DEFB130 | 12320962 | 1.8101  | 2.689   | -0.8353 |
| YRI | DEFB130 | 12325962 | 2.375   | 4.0335  | -1.1222 |
| YRI | DEFB130 | 12330962 | 1.4408  | 3.8654  | -1.7015 |
| YRI | DEFB130 | 12335962 | 2.8487  | 5.7141  | -1.4288 |
| YRI | DEFB130 | 12340962 | 8.9941  | 8.9073  | 0.0289  |
| YRI | DEFB130 | 12345962 | 7.6076  | 6.7225  | 0.3814  |
| YRI | DEFB130 | 12350962 | 1.6568  | 2.8571  | -1.0855 |
| YRI | DEFB130 | 12355962 | 1.1642  | 2.3529  | -1.2583 |
| YRI | DEFB130 | 12360962 | 2.3694  | 2.689   | -0.3037 |
| YRI | DEFB130 | 12365962 | 1.8705  | 2.3529  | -0.5106 |
| YRI | DEFB130 | 12370962 | 1.9328  | 2.0167  | -0.1003 |
| YRI | DEFB130 | 12375962 | 4.4436  | 4.2016  | 0.1581  |
| YRI | DEFB130 | 12380962 | 4.744   | 5.2099  | -0.2522 |
| YRI | DEFB130 | 12385962 | 3.2985  | 3.3612  | -0.0495 |
| YRI | DEFB130 | 12390962 | 3.4696  | 2.1848  | 1.4426  |
| YRI | DEFB130 | 12395962 | 6.1428  | 6.3864  | -0.1099 |
| YRI | DEFB130 | 12400962 | 10.8453 | 10.0837 | 0.2261  |
| YRI | DEFB130 | 12405962 | 11.0754 | 9.4115  | 0.5266  |
| YRI | DEFB130 | 12410962 | 5.8678  | 6.7225  | -0.3683 |
| YRI | DEFB130 | 12415962 | 6.4228  | 7.5628  | -0.4413 |
| YRI | DEFB130 | 12420962 | 9.1488  | 9.5795  | -0.1341 |
| YRI | DEFB130 | 12425962 | 8.4885  | 7.8989  | 0.2193  |
| YRI | DEFB130 | 12430962 | 7.4259  | 7.7309  | -0.1157 |
| YRI | DEFB130 | 12435962 | 8.9951  | 9.7476  | -0.2305 |
| YRI | DEFB130 | 12440962 | 9.2521  | 10.5879 | -0.3788 |
| YRI | DEFB130 | 12445962 | 7.1256  | 9.2434  | -0.6816 |
| YRI | DEFB130 | 12450962 | 8.0419  | 8.9073  | -0.2882 |
| YRI | DEFB130 | 12455962 | 7.3409  | 7.8989  | -0.2076 |
| YRI | DEFB130 | 12460962 | 3.4643  | 4.7057  | -0.7349 |
| YRI | DEFB130 | 12465962 | 9.194   | 13.613  | -0.9891 |
| YRI | DEFB130 | 12470962 | 17.0062 | 25.3774 | -1.0301 |
| YRI | DEFB130 | 12475962 | 19.1551 | 26.5538 | -0.8713 |

## 2\_TajimasD\_data

|     |         |          |         |         |         |
|-----|---------|----------|---------|---------|---------|
| YRI | DEFB130 | 12480962 | 22.3448 | 31.7638 | -0.9315 |
| YRI | DEFB130 | 12485962 | 28.1456 | 41.0072 | -0.9906 |
| YRI | DEFB130 | 12490962 | 30.9402 | 43.8642 | -0.9317 |
| YRI | DEFB130 | 12495962 | 26.3583 | 37.6459 | -0.9454 |
| YRI | DEFB130 | 12500962 | 24.5429 | 35.9653 | -1.0005 |
| YRI | DEFB130 | 12505962 | 25.2128 | 39.4946 | -1.1413 |
| YRI | DEFB130 | 12510962 | 26.5446 | 40.1669 | -1.0707 |
| YRI | DEFB130 | 12515962 | 24.6605 | 43.0239 | -1.3492 |
| YRI | DEFB130 | 12520962 | 23.472  | 47.3935 | -1.5981 |
| YRI | DEFB130 | 12525962 | 27.9131 | 46.7213 | -1.2743 |
| YRI | DEFB130 | 12530962 | 30.8612 | 41.1752 | -0.7912 |
| YRI | DEFB130 | 12535962 | 31.984  | 38.9904 | -0.567  |
| YRI | DEFB130 | 12540962 | 32.2686 | 42.3517 | -0.7524 |
| YRI | DEFB130 | 12545962 | 33.0117 | 43.8642 | -0.7823 |
| YRI | DEFB130 | 12550962 | 27.0413 | 36.8056 | -0.8361 |
| YRI | DEFB130 | 12555962 | 23.5625 | 33.2763 | -0.918  |
| YRI | DEFB130 | 12560962 | 24.7773 | 34.9569 | -0.9168 |
| YRI | DEFB130 | 12565962 | 27.971  | 37.3098 | -0.7891 |
| YRI | DEFB130 | 12570962 | 25.6637 | 33.9486 | -0.7678 |
| YRI | DEFB130 | 12575962 | 12.5717 | 23.0245 | -1.4135 |
| YRI | DEFB130 | 12580962 | 10.0036 | 16.9743 | -1.2643 |
| YRI | DEFB130 | 12585962 | 12.2649 | 16.302  | -0.7611 |
| YRI | DEFB130 | 12590962 | 9.9654  | 15.2937 | -1.0676 |
| YRI | DEFB130 | 12595962 | 10.9565 | 15.1256 | -0.8442 |
| YRI | DEFB130 | 12600962 | 18.8883 | 21.512  | -0.3789 |
| YRI | DEFB130 | 12605962 | 18.4769 | 22.6884 | -0.5777 |
| YRI | DEFB130 | 12610962 | 11.222  | 16.134  | -0.9352 |
| YRI | DEFB130 | 12615962 | 10.6516 | 16.6382 | -1.1068 |
| YRI | DEFB130 | 12620962 | 10.3913 | 20.5036 | -1.5296 |
| YRI | DEFB130 | 12625962 | 19.6359 | 23.5287 | -0.5155 |
| YRI | DEFB130 | 12630962 | 25.9525 | 23.3606 | 0.3456  |
| YRI | DEFB130 | 12635962 | 22.452  | 21.512  | 0.1357  |
| YRI | DEFB130 | 12640962 | 19.7304 | 21.0078 | -0.1887 |
| YRI | DEFB130 | 12645962 | 13.747  | 19.4952 | -0.9128 |
| YRI | DEFB130 | 12650962 | 11.4069 | 20.6717 | -1.3904 |
| YRI | DEFB130 | 12655962 | 12.2305 | 24.369  | -1.5537 |
| YRI | DEFB130 | 12660962 | 16.2561 | 24.8732 | -1.0813 |
| YRI | DEFB130 | 12665962 | 16.8722 | 19.8313 | -0.4622 |
| YRI | DEFB130 | 12670962 | 15.1896 | 17.9827 | -0.4793 |
| YRI | DEFB130 | 12675962 | 14.3155 | 17.3104 | -0.5331 |
| YRI | DEFB130 | 12680962 | 14.4565 | 18.6549 | -0.6955 |
| YRI | DEFB130 | 12685962 | 20.2482 | 22.5203 | -0.3139 |
| YRI | DEFB130 | 12690962 | 20.9595 | 21.512  | -0.0798 |
| YRI | DEFB130 | 12695962 | 16.8556 | 21.68   | -0.6915 |
| YRI | DEFB130 | 12700962 | 21.8572 | 25.3774 | -0.4332 |
| YRI | DEFB130 | 12705962 | 21.9245 | 23.3606 | -0.1915 |
| YRI | DEFB130 | 12710962 | 17.7047 | 22.3523 | -0.6468 |
| YRI | DEFB130 | 12715962 | 17.8545 | 26.0496 | -0.9832 |
| YRI | DEFB130 | 12720962 | 14.5645 | 23.5287 | -1.1871 |

## 2\_TajimasD\_data

|     |         |           |         |         |         |
|-----|---------|-----------|---------|---------|---------|
| YRI | DEFB130 | 12725962  | 12.9138 | 21.1758 | -1.2114 |
| YRI | DEFB130 | 12730962  | 14.4809 | 22.6884 | -1.1258 |
| YRI | DEFB130 | 12735962  | 16.6931 | 23.8648 | -0.9367 |
| YRI | DEFB130 | 12740962  | 15.3083 | 21.1758 | -0.8603 |
| YRI | DEFB130 | 12745962  | 14.7099 | 19.8313 | -0.8    |
| YRI | DEFB130 | 12750962  | 16.2736 | 20.3355 | -0.6193 |
| YRI | DEFB130 | 12755962  | 14.3589 | 20.6717 | -0.9474 |
| YRI | DEFB130 | 12760962  | 14.0871 | 22.3523 | -1.1502 |
| YRI | DEFB130 | 12765962  | 21.0522 | 22.5203 | -0.2028 |
| YRI | DEFB130 | 12770962  | 20.25   | 22.3523 | -0.2926 |
| YRI | DEFB130 | 12775962  | 13.4983 | 19.3272 | -0.9333 |
| YRI | DEFB130 | 12780962  | 11.8351 | 17.3104 | -0.9746 |
| YRI | DEFB130 | 12785962  | 12.5835 | 20.1675 | -1.1656 |
| YRI | DEFB130 | 12790962  | 15.4033 | 21.8481 | -0.9169 |
| YRI | DEFB130 | 12795962  | 16.304  | 21.68   | -0.7706 |
| YRI | DEFB130 | 12800962  | 15.4176 | 22.0162 | -0.9318 |
| YRI | DEFB130 | 12805962  | 17.9598 | 22.6884 | -0.6486 |
| YRI | DEFB130 | 12810962  | 20.9005 | 23.8648 | -0.3872 |
| CEU | FAM72A  | 205691179 | 5.2791  | 7.8459  | -0.9669 |
| CEU | FAM72A  | 205696179 | 4.6545  | 8.187   | -1.2797 |
| CEU | FAM72A  | 205701179 | 3.6263  | 6.8225  | -1.3676 |
| CEU | FAM72A  | 205706179 | 3.57    | 6.6519  | -1.3493 |
| CEU | FAM72A  | 205711179 | 7.1744  | 8.6987  | -0.5222 |
| CEU | FAM72A  | 205716179 | 8.5409  | 9.3809  | -0.2683 |
| CEU | FAM72A  | 205721179 | 7.9763  | 8.187   | -0.0763 |
| CEU | FAM72A  | 205726179 | 6.7388  | 8.0164  | -0.4719 |
| CEU | FAM72A  | 205731179 | 5.0202  | 8.6987  | -1.2602 |
| CEU | FAM72A  | 205736179 | 7.5558  | 10.916  | -0.932  |
| CEU | FAM72A  | 205741179 | 9.388   | 10.4043 | -0.2948 |
| CEU | FAM72A  | 205746179 | 7.153   | 8.3576  | -0.4282 |
| CEU | FAM72A  | 205751179 | 10.3292 | 10.0632 | 0.0796  |
| CEU | FAM72A  | 205756179 | 11.482  | 9.7221  | 0.5439  |
| CEU | FAM72A  | 205761179 | 7.6342  | 8.6987  | -0.3647 |
| CEU | FAM72A  | 205766179 | 5.7954  | 7.5047  | -0.6706 |
| CEU | FAM72A  | 205771179 | 6.0954  | 7.8459  | -0.6594 |
| CEU | FAM72A  | 205776179 | 5.826   | 8.3576  | -0.8999 |
| CEU | FAM72A  | 205781179 | 4.0099  | 5.2874  | -0.6869 |
| CEU | FAM72A  | 205786179 | 6.3457  | 6.1402  | 0.0967  |
| CEU | FAM72A  | 205791179 | 8.6265  | 8.187   | 0.1592  |
| CEU | FAM72A  | 205796179 | 7.9588  | 8.0164  | -0.0213 |
| CEU | FAM72A  | 205801179 | 4.8303  | 5.7991  | -0.4798 |
| CEU | FAM72A  | 205806179 | 4.6291  | 5.458   | -0.4333 |
| CEU | FAM72A  | 205811179 | 6.1699  | 7.5047  | -0.5237 |
| CEU | FAM72A  | 205816179 | 7.8922  | 8.5281  | -0.2219 |
| CEU | FAM72A  | 205821179 | 8.4677  | 11.4277 | -0.7864 |
| CEU | FAM72A  | 205826179 | 6.4451  | 10.916  | -1.24   |
| CEU | FAM72A  | 205831179 | 5.6698  | 8.0164  | -0.8667 |
| CEU | FAM72A  | 205836179 | 5.7641  | 7.1636  | -0.5729 |
| CEU | FAM72A  | 205841179 | 7.6903  | 9.0398  | -0.4462 |



## 2\_TajimasD\_data

|     |        |           |         |         |         |
|-----|--------|-----------|---------|---------|---------|
| CEU | FAM72A | 205846179 | 9.4616  | 11.2571 | -0.4838 |
| CEU | FAM72A | 205851179 | 7.791   | 10.916  | -0.8667 |
| CEU | FAM72A | 205856179 | 6.2004  | 10.2337 | -1.1882 |
| CEU | FAM72A | 205861179 | 5.2016  | 8.0164  | -1.0397 |
| CEU | FAM72A | 205866179 | 5.2321  | 7.5047  | -0.8917 |
| CEU | FAM72A | 205871179 | 5.4593  | 6.8225  | -0.5833 |
| CEU | FAM72A | 205876179 | 4.2804  | 5.458   | -0.6156 |
| CEU | FAM72A | 205881179 | 5.3799  | 8.187   | -1.017  |
| CEU | FAM72A | 205886179 | 8.9392  | 11.9394 | -0.7649 |
| CEU | FAM72A | 205891179 | 11.462  | 11.5982 | -0.0357 |
| CEU | FAM72A | 205896179 | 11.4172 | 11.4277 | -0.0028 |
| CEU | FAM72A | 205901179 | 8.1037  | 10.5749 | -0.7061 |
| CEU | FAM72A | 205906179 | 11.9854 | 11.0866 | 0.2457  |
| CEU | FAM72A | 205911179 | 15.96   | 11.5982 | 1.1428  |
| CEU | FAM72A | 205916179 | 11.6855 | 9.3809  | 0.7362  |
| CEU | FAM72A | 205921179 | 6.5237  | 6.1402  | 0.1805  |
| CEU | FAM72A | 205926179 | 1.7621  | 1.7056  | 0.0774  |
| CEU | FAM72A | 205931179 | 0       | 0       | 0       |
| CEU | FAM72A | 205936179 | 0       | 0       | 0       |
| CEU | FAM72A | 205941179 | 0       | 0       | 0       |
| CEU | FAM72A | 205946179 | 0       | 0       | 0       |
| CEU | FAM72A | 205951179 | 0       | 0       | 0       |
| CEU | FAM72A | 205956179 | 0       | 0       | 0       |
| CEU | FAM72A | 205961179 | 0       | 0       | 0       |
| CEU | FAM72A | 205966179 | 0       | 0       | 0       |
| CEU | FAM72A | 205971179 | 0       | 0       | 0       |
| CEU | FAM72A | 205976179 | 0       | 0       | 0       |
| CEU | FAM72A | 205981179 | 0       | 0       | 0       |
| CEU | FAM72A | 205986179 | 0       | 0       | 0       |
| CEU | FAM72A | 205991179 | 0       | 0       | 0       |
| CEU | FAM72A | 205996179 | 0       | 0       | 0       |
| CEU | FAM72A | 206001179 | 0       | 0       | 0       |
| CEU | FAM72A | 206006179 | 0       | 0       | 0       |
| CEU | FAM72A | 206011179 | 0       | 0       | 0       |
| CEU | FAM72A | 206016179 | 0       | 0       | 0       |
| CEU | FAM72A | 206021179 | 0       | 0       | 0       |
| CEU | FAM72A | 206026179 | 0       | 0       | 0       |
| CEU | FAM72A | 206031179 | 0       | 0       | 0       |
| CEU | FAM72A | 206036179 | 0       | 0       | 0       |
| CEU | FAM72A | 206041179 | 0       | 0       | 0       |
| CEU | FAM72A | 206046179 | 0       | 0       | 0       |
| CEU | FAM72A | 206051179 | 0       | 0       | 0       |
| CEU | FAM72A | 206056179 | 0       | 0       | 0       |
| CEU | FAM72A | 206061179 | 0       | 0       | 0       |
| CEU | FAM72A | 206066179 | 0       | 0       | 0       |
| CEU | FAM72A | 206071179 | 1.2531  | 1.5351  | -0.4182 |
| CEU | FAM72A | 206076179 | 2.9272  | 3.2407  | -0.2571 |
| CEU | FAM72A | 206081179 | 6.046   | 3.9229  | 1.4808  |
| CEU | FAM72A | 206086179 | 5.3898  | 3.4112  | 1.554   |

## 2\_TajimasD\_data

|     |        |           |        |         |         |
|-----|--------|-----------|--------|---------|---------|
| CEU | FAM72A | 206091179 | 2.683  | 2.5584  | 0.1241  |
| CEU | FAM72A | 206096179 | 4.4548 | 3.5818  | 0.658   |
| CEU | FAM72A | 206101179 | 4.3401 | 4.0935  | 0.1658  |
| CEU | FAM72A | 206106179 | 1.8771 | 2.8996  | -0.9196 |
| CEU | FAM72A | 206111179 | 0.6392 | 1.8762  | -1.5749 |
| CEU | FAM72A | 206116179 | 1.9845 | 2.729   | -0.7037 |
| CEU | FAM72A | 206121179 | 1.831  | 3.0701  | -1.0629 |
| CEU | FAM72A | 206126179 | 0.5329 | 3.2407  | -2.2203 |
| CEU | FAM72A | 206131179 | 0.7947 | 2.8996  | -1.893  |
| CEU | FAM72A | 206136179 | 1.5972 | 1.8762  | -0.3552 |
| CEU | FAM72A | 206141179 | 1.4842 | 2.729   | -1.1766 |
| CEU | FAM72A | 206146179 | 0.7405 | 2.5584  | -1.8109 |
| CEU | FAM72A | 206151179 | 0.5747 | 1.1939  | -1.1034 |
| CEU | FAM72A | 206156179 | 0.5886 | 1.7056  | -1.5299 |
| CEU | FAM72A | 206161179 | 0.5165 | 1.7056  | -1.6286 |
| CEU | FAM72A | 206166179 | 0.3381 | 1.3645  | -1.6605 |
| CEU | FAM72A | 206171179 | 2.2472 | 3.5818  | -1.0059 |
| CEU | FAM72A | 206176179 | 2.289  | 3.5818  | -0.9744 |
| CEU | FAM72A | 206181179 | 0.7108 | 2.5584  | -1.8405 |
| CEU | FAM72A | 206186179 | 1.5158 | 4.6052  | -1.8757 |
| CEU | FAM72A | 206191179 | 2.3329 | 6.8225  | -1.9211 |
| CEU | FAM72A | 206196179 | 2.6999 | 8.3576  | -2.0111 |
| CEU | FAM72A | 206201179 | 2.6957 | 8.6987  | -2.0566 |
| CEU | FAM72A | 206206179 | 6.7553 | 11.2571 | -1.2131 |
| CEU | FAM72A | 206211179 | 9.8683 | 13.3039 | -0.7908 |
| CEU | FAM72A | 206216179 | 8.4554 | 11.7688 | -0.8563 |
| CEU | FAM72A | 206221179 | 6.6003 | 9.0398  | -0.8066 |
| CEU | FAM72A | 206226179 | 7.2832 | 10.5749 | -0.9405 |
| CEU | FAM72A | 206231179 | 8.5027 | 11.5982 | -0.811  |
| CEU | FAM72A | 206236179 | 6.2603 | 9.7221  | -1.0698 |
| CEU | FAM72A | 206241179 | 4.2999 | 8.8692  | -1.5376 |
| CEU | FAM72A | 206246179 | 2.9485 | 5.9697  | -1.4581 |
| CEU | FAM72A | 206251179 | 1.5271 | 3.9229  | -1.671  |
| CEU | FAM72A | 206256179 | 2.1905 | 4.4346  | -1.408  |
| CEU | FAM72A | 206261179 | 3.2125 | 4.9463  | -0.9888 |
| CEU | FAM72A | 206266179 | 2.7345 | 4.7757  | -1.2005 |
| CEU | FAM72A | 206271179 | 2.0557 | 5.1169  | -1.6944 |
| CEU | FAM72A | 206276179 | 2.2426 | 5.7991  | -1.7615 |
| CEU | FAM72A | 206281179 | 6.4376 | 8.187   | -0.6338 |
| CEU | FAM72A | 206286179 | 6.9817 | 9.0398  | -0.6805 |
| CEU | FAM72A | 206291179 | 4.2323 | 8.187   | -1.4327 |
| CEU | FAM72A | 206296179 | 2.6751 | 8.3576  | -2.02   |
| CEU | FAM72A | 206301179 | 1.4525 | 9.2104  | -2.5209 |
| CEU | FAM72A | 206306179 | 1.7471 | 9.8926  | -2.4768 |
| CEU | FAM72A | 206311179 | 1.529  | 10.916  | -2.6035 |
| CEU | FAM72A | 206316179 | 1.2845 | 9.5515  | -2.5972 |
| CEU | FAM72A | 206321179 | 3.5553 | 6.8225  | -1.398  |
| CEU | FAM72A | 206326179 | 6.6448 | 5.9697  | 0.3258  |
| CEU | FAM72A | 206331179 | 3.8693 | 3.5818  | 0.2167  |

## 2\_TajimasD\_data

|     |        |           |        |        |         |
|-----|--------|-----------|--------|--------|---------|
| CEU | FAM72A | 206336179 | 0.153  | 0.6822 | -1.3819 |
| CEU | FAM72A | 206341179 | 0      | 0      | 0       |
| CEU | FAM72A | 206346179 | 0      | 0      | 0       |
| CEU | FAM72A | 206351179 | 0      | 0      | 0       |
| CEU | FAM72A | 206356179 | 0      | 0      | 0       |
| CEU | FAM72A | 206361179 | 0      | 0      | 0       |
| CEU | FAM72A | 206366179 | 0      | 0      | 0       |
| CEU | FAM72A | 206371179 | 0      | 0      | 0       |
| CEU | FAM72A | 206376179 | 0      | 0      | 0       |
| CEU | FAM72A | 206381179 | 0      | 0      | 0       |
| CEU | FAM72A | 206386179 | 0      | 0      | 0       |
| CEU | FAM72A | 206391179 | 0      | 0      | 0       |
| CEU | FAM72A | 206396179 | 0      | 0      | 0       |
| CEU | FAM72A | 206401179 | 0      | 0      | 0       |
| CEU | FAM72A | 206406179 | 0      | 0      | 0       |
| CEU | FAM72A | 206411179 | 0      | 0      | 0       |
| CEU | FAM72A | 206416179 | 0      | 0      | 0       |
| CEU | FAM72A | 206421179 | 0      | 0      | 0       |
| CEU | FAM72A | 206426179 | 0      | 0      | 0       |
| CEU | FAM72A | 206431179 | 0      | 0      | 0       |
| CEU | FAM72A | 206436179 | 0      | 0      | 0       |
| CEU | FAM72A | 206441179 | 0      | 0      | 0       |
| CEU | FAM72A | 206446179 | 0      | 0      | 0       |
| CEU | FAM72A | 206451179 | 0      | 0      | 0       |
| CEU | FAM72A | 206456179 | 0      | 0      | 0       |
| CEU | FAM72A | 206461179 | 0      | 0      | 0       |
| CEU | FAM72A | 206466179 | 0      | 0      | 0       |
| CEU | FAM72A | 206471179 | 0      | 0      | 0       |
| CEU | FAM72A | 206476179 | 0      | 0      | 0       |
| CEU | FAM72A | 206481179 | 0.5321 | 1.5351 | -1.4873 |
| CEU | FAM72A | 206486179 | 1.8258 | 3.4112 | -1.2452 |
| CEU | FAM72A | 206491179 | 1.9171 | 2.8996 | -0.8836 |
| CEU | FAM72A | 206496179 | 1.3851 | 2.2173 | -0.9297 |
| CEU | FAM72A | 206501179 | 0.8211 | 1.3645 | -0.8791 |
| CEU | FAM72A | 206506179 | 0.3364 | 1.8762 | -1.9604 |
| CEU | FAM72A | 206511179 | 1.9476 | 3.7524 | -1.3075 |
| CEU | FAM72A | 206516179 | 2.7992 | 4.0935 | -0.8703 |
| CEU | FAM72A | 206521179 | 2.6947 | 3.7524 | -0.7663 |
| CEU | FAM72A | 206526179 | 2.8984 | 4.0935 | -0.8036 |
| CEU | FAM72A | 206531179 | 1.8064 | 4.0935 | -1.5379 |
| CEU | FAM72A | 206536179 | 2.2946 | 3.5818 | -0.9702 |
| CEU | FAM72A | 206541179 | 4.0159 | 4.4346 | -0.2627 |
| CEU | FAM72A | 206546179 | 2.3845 | 3.9229 | -1.073  |
| CEU | FAM72A | 206551179 | 0.8598 | 2.5584 | -1.6921 |
| CEU | FAM72A | 206556179 | 1.4135 | 4.0935 | -1.8021 |
| CEU | FAM72A | 206561179 | 1.3723 | 4.0935 | -1.8298 |
| CEU | FAM72A | 206566179 | 1.6465 | 3.4112 | -1.386  |
| CEU | FAM72A | 206571179 | 1.2915 | 3.0701 | -1.5257 |
| CEU | FAM72A | 206576179 | 0.7718 | 1.1939 | -0.7522 |

## 2\_TajimasD\_data

|     |        |           |         |         |         |
|-----|--------|-----------|---------|---------|---------|
| CEU | FAM72A | 206581179 | 1.3434  | 3.4112  | -1.6241 |
| CEU | FAM72A | 206586179 | 1.3228  | 8.187   | -2.4868 |
| CEU | FAM72A | 206591179 | 2.484   | 8.6987  | -2.1291 |
| CEU | FAM72A | 206596179 | 4.1713  | 10.4043 | -1.8082 |
| CEU | FAM72A | 206601179 | 4.3935  | 11.0866 | -1.8295 |
| CEU | FAM72A | 206606179 | 3.497   | 7.8459  | -1.6383 |
| CEU | FAM72A | 206611179 | 2.8617  | 7.3342  | -1.792  |
| CEU | FAM72A | 206616179 | 5.06    | 6.8225  | -0.7542 |
| CEU | FAM72A | 206621179 | 11.8128 | 9.2104  | 0.8456  |
| CEU | FAM72A | 206626179 | 11.3634 | 8.8692  | 0.8393  |
| CEU | FAM72A | 206631179 | 6.1828  | 6.4814  | -0.1338 |
| CEU | FAM72A | 206636179 | 8.3059  | 8.8692  | -0.1896 |
| CEU | FAM72A | 206641179 | 9.3307  | 10.2337 | -0.266  |
| CEU | FAM72A | 206646179 | 10.4964 | 11.0866 | -0.1613 |
| CEU | FAM72A | 206651179 | 10.3412 | 10.916  | -0.1594 |
| CEU | FAM72A | 206656179 | 7.1534  | 8.6987  | -0.5294 |
| CEU | FAM72A | 206661179 | 4.4047  | 7.1636  | -1.1294 |
| CEU | FAM72A | 206666179 | 8.5741  | 8.8692  | -0.0993 |
| CEU | FAM72A | 206671179 | 12.0225 | 8.8692  | 1.0611  |
| CEU | FAM72A | 206676179 | 11.3894 | 7.8459  | 1.3349  |
| CEU | FAM72A | 206681179 | 9.8233  | 6.6519  | 1.3885  |
| CEU | FAM72A | 206686179 | 5.0177  | 4.7757  | 0.1423  |
| CEU | FAM72A | 206691179 | 6.1785  | 6.3108  | -0.0607 |
| CEU | FAM72A | 206696179 | 6.6955  | 7.1636  | -0.1916 |
| CHB | FAM72A | 205691179 | 3.9193  | 5.7601  | -0.9146 |
| CHB | FAM72A | 205696179 | 5.6467  | 5.9295  | -0.1369 |
| CHB | FAM72A | 205701179 | 3.146   | 5.0825  | -1.0751 |
| CHB | FAM72A | 205706179 | 1.7299  | 5.2519  | -1.8995 |
| CHB | FAM72A | 205711179 | 6.984   | 6.946   | 0.016   |
| CHB | FAM72A | 205716179 | 8.5991  | 5.9295  | 1.2924  |
| CHB | FAM72A | 205721179 | 9.4904  | 6.7766  | 1.1649  |
| CHB | FAM72A | 205726179 | 9.9753  | 7.7931  | 0.8248  |
| CHB | FAM72A | 205731179 | 9.3516  | 6.946   | 1.0098  |
| CHB | FAM72A | 205736179 | 12.9777 | 9.6567  | 1.0298  |
| CHB | FAM72A | 205741179 | 10.9025 | 8.8096  | 0.7066  |
| CHB | FAM72A | 205746179 | 6.2621  | 6.0989  | 0.077   |
| CHB | FAM72A | 205751179 | 13.0841 | 8.979   | 1.3618  |
| CHB | FAM72A | 205756179 | 14.0409 | 8.4708  | 1.9499  |
| CHB | FAM72A | 205761179 | 7.6737  | 6.6072  | 0.4684  |
| CHB | FAM72A | 205766179 | 6.055   | 7.1154  | -0.4355 |
| CHB | FAM72A | 205771179 | 7.2753  | 7.6237  | -0.1344 |
| CHB | FAM72A | 205776179 | 7.6354  | 6.2684  | 0.6296  |
| CHB | FAM72A | 205781179 | 4.6189  | 4.7436  | -0.0736 |
| CHB | FAM72A | 205786179 | 4.248   | 6.7766  | -1.0854 |
| CHB | FAM72A | 205791179 | 6.344   | 7.7931  | -0.5477 |
| CHB | FAM72A | 205796179 | 6.6926  | 6.946   | -0.1064 |
| CHB | FAM72A | 205801179 | 3.0093  | 5.0825  | -1.151  |
| CHB | FAM72A | 205806179 | 3.5924  | 4.2354  | -0.4186 |
| CHB | FAM72A | 205811179 | 6.331   | 6.0989  | 0.1096  |

## 2\_TajimasD\_data

|     |        |           |         |         |         |
|-----|--------|-----------|---------|---------|---------|
| CHB | FAM72A | 205816179 | 9.4272  | 8.6402  | 0.2705  |
| CHB | FAM72A | 205821179 | 11.9417 | 9.3178  | 0.8411  |
| CHB | FAM72A | 205826179 | 9.7881  | 8.979   | 0.2684  |
| CHB | FAM72A | 205831179 | 6.9212  | 7.4543  | -0.2098 |
| CHB | FAM72A | 205836179 | 6.083   | 7.2848  | -0.4831 |
| CHB | FAM72A | 205841179 | 7.9838  | 8.979   | -0.3301 |
| CHB | FAM72A | 205846179 | 9.7472  | 9.6567  | 0.0281  |
| CHB | FAM72A | 205851179 | 7.4752  | 8.8096  | -0.4505 |
| CHB | FAM72A | 205856179 | 6.8747  | 7.9625  | -0.4031 |
| CHB | FAM72A | 205861179 | 7.0339  | 6.946   | 0.0369  |
| CHB | FAM72A | 205866179 | 6.569   | 7.2848  | -0.2877 |
| CHB | FAM72A | 205871179 | 6.7017  | 7.2848  | -0.2344 |
| CHB | FAM72A | 205876179 | 5.0849  | 7.1154  | -0.8339 |
| CHB | FAM72A | 205881179 | 6.0941  | 9.1484  | -0.9958 |
| CHB | FAM72A | 205886179 | 7.9517  | 12.3673 | -1.0859 |
| CHB | FAM72A | 205891179 | 11.0961 | 13.892  | -0.6159 |
| CHB | FAM72A | 205896179 | 12.8938 | 11.8591 | 0.2647  |
| CHB | FAM72A | 205901179 | 8.695   | 9.6567  | -0.2982 |
| CHB | FAM72A | 205906179 | 8.1753  | 11.1814 | -0.8128 |
| CHB | FAM72A | 205911179 | 9.3918  | 11.012  | -0.4444 |
| CHB | FAM72A | 205916179 | 6.4769  | 9.3178  | -0.9106 |
| CHB | FAM72A | 205921179 | 3.3373  | 6.6072  | -1.4362 |
| CHB | FAM72A | 205926179 | 1.0683  | 1.5247  | -0.678  |
| CHB | FAM72A | 205931179 | 0       | 0       | 0       |
| CHB | FAM72A | 205936179 | 0       | 0       | 0       |
| CHB | FAM72A | 205941179 | 0       | 0       | 0       |
| CHB | FAM72A | 205946179 | 0       | 0       | 0       |
| CHB | FAM72A | 205951179 | 0       | 0       | 0       |
| CHB | FAM72A | 205956179 | 0       | 0       | 0       |
| CHB | FAM72A | 205961179 | 0       | 0       | 0       |
| CHB | FAM72A | 205966179 | 0       | 0       | 0       |
| CHB | FAM72A | 205971179 | 0       | 0       | 0       |
| CHB | FAM72A | 205976179 | 0       | 0       | 0       |
| CHB | FAM72A | 205981179 | 0       | 0       | 0       |
| CHB | FAM72A | 205986179 | 0       | 0       | 0       |
| CHB | FAM72A | 205991179 | 0       | 0       | 0       |
| CHB | FAM72A | 205996179 | 0       | 0       | 0       |
| CHB | FAM72A | 206001179 | 0       | 0       | 0       |
| CHB | FAM72A | 206006179 | 0       | 0       | 0       |
| CHB | FAM72A | 206011179 | 0       | 0       | 0       |
| CHB | FAM72A | 206016179 | 0       | 0       | 0       |
| CHB | FAM72A | 206021179 | 0       | 0       | 0       |
| CHB | FAM72A | 206026179 | 0       | 0       | 0       |
| CHB | FAM72A | 206031179 | 0       | 0       | 0       |
| CHB | FAM72A | 206036179 | 0       | 0       | 0       |
| CHB | FAM72A | 206041179 | 0       | 0       | 0       |
| CHB | FAM72A | 206046179 | 0       | 0       | 0       |
| CHB | FAM72A | 206051179 | 0       | 0       | 0       |
| CHB | FAM72A | 206056179 | 0       | 0       | 0       |

## 2\_TajimasD\_data

|     |        |           |         |         |         |
|-----|--------|-----------|---------|---------|---------|
| CHB | FAM72A | 206061179 | 0       | 0       | 0       |
| CHB | FAM72A | 206066179 | 0       | 0       | 0       |
| CHB | FAM72A | 206071179 | 1.2085  | 1.8636  | -0.8358 |
| CHB | FAM72A | 206076179 | 2.7716  | 3.5577  | -0.5941 |
| CHB | FAM72A | 206081179 | 5.5745  | 4.913   | 0.3784  |
| CHB | FAM72A | 206086179 | 5.0742  | 5.4213  | -0.182  |
| CHB | FAM72A | 206091179 | 2.4824  | 3.5577  | -0.8127 |
| CHB | FAM72A | 206096179 | 3.6503  | 3.8965  | -0.1722 |
| CHB | FAM72A | 206101179 | 3.2658  | 4.066   | -0.5396 |
| CHB | FAM72A | 206106179 | 1.2935  | 2.8801  | -1.4305 |
| CHB | FAM72A | 206111179 | 0.7531  | 3.5577  | -2.1196 |
| CHB | FAM72A | 206116179 | 2.1618  | 4.066   | -1.2841 |
| CHB | FAM72A | 206121179 | 1.981   | 3.0495  | -0.9189 |
| CHB | FAM72A | 206126179 | 0.5722  | 3.0495  | -2.1305 |
| CHB | FAM72A | 206131179 | 0.7874  | 3.8965  | -2.1746 |
| CHB | FAM72A | 206136179 | 1.6566  | 3.3883  | -1.3638 |
| CHB | FAM72A | 206141179 | 1.4609  | 3.2189  | -1.4453 |
| CHB | FAM72A | 206146179 | 0.6179  | 3.5577  | -2.2218 |
| CHB | FAM72A | 206151179 | 0.6297  | 2.5412  | -1.9088 |
| CHB | FAM72A | 206156179 | 0.5322  | 1.5247  | -1.4745 |
| CHB | FAM72A | 206161179 | 0.4952  | 2.8801  | -2.1502 |
| CHB | FAM72A | 206166179 | 0.5637  | 3.5577  | -2.2627 |
| CHB | FAM72A | 206171179 | 1.8627  | 3.7271  | -1.3544 |
| CHB | FAM72A | 206176179 | 2.5707  | 5.9295  | -1.626  |
| CHB | FAM72A | 206181179 | 1.6859  | 5.7601  | -2.0242 |
| CHB | FAM72A | 206186179 | 1.6421  | 5.7601  | -2.0459 |
| CHB | FAM72A | 206191179 | 2.2102  | 6.7766  | -1.9602 |
| CHB | FAM72A | 206196179 | 2.2498  | 7.1154  | -1.9982 |
| CHB | FAM72A | 206201179 | 2.7512  | 7.7931  | -1.9056 |
| CHB | FAM72A | 206206179 | 9.663   | 13.045  | -0.7908 |
| CHB | FAM72A | 206211179 | 14.0899 | 18.1274 | -0.6899 |
| CHB | FAM72A | 206216179 | 10.4234 | 16.4333 | -1.1281 |
| CHB | FAM72A | 206221179 | 5.9701  | 12.1979 | -1.5516 |
| CHB | FAM72A | 206226179 | 5.6472  | 12.3673 | -1.6526 |
| CHB | FAM72A | 206231179 | 7.0238  | 15.7556 | -1.7064 |
| CHB | FAM72A | 206236179 | 7.252   | 15.2474 | -1.6121 |
| CHB | FAM72A | 206241179 | 7.6891  | 14.0615 | -1.3878 |
| CHB | FAM72A | 206246179 | 5.4633  | 10.8426 | -1.4971 |
| CHB | FAM72A | 206251179 | 2.5606  | 7.9625  | -2.0018 |
| CHB | FAM72A | 206256179 | 2.8959  | 7.4543  | -1.7943 |
| CHB | FAM72A | 206261179 | 3.9534  | 7.1154  | -1.2985 |
| CHB | FAM72A | 206266179 | 3.6092  | 8.4708  | -1.7019 |
| CHB | FAM72A | 206271179 | 2.6221  | 8.8096  | -2.0891 |
| CHB | FAM72A | 206276179 | 3.3969  | 9.6567  | -1.941  |
| CHB | FAM72A | 206281179 | 7.8205  | 11.012  | -0.8754 |
| CHB | FAM72A | 206286179 | 6.3533  | 11.012  | -1.2778 |
| CHB | FAM72A | 206291179 | 2.0649  | 8.6402  | -2.2602 |
| CHB | FAM72A | 206296179 | 1.4911  | 7.7931  | -2.3818 |
| CHB | FAM72A | 206301179 | 1.5696  | 11.012  | -2.59   |

## 2\_TajimasD\_data

|     |        |           |        |         |         |
|-----|--------|-----------|--------|---------|---------|
| CHB | FAM72A | 206306179 | 1.6364 | 11.6896 | -2.6071 |
| CHB | FAM72A | 206311179 | 0.9861 | 8.6402  | -2.631  |
| CHB | FAM72A | 206316179 | 0.7818 | 6.4378  | -2.5431 |
| CHB | FAM72A | 206321179 | 1.7624 | 7.6237  | -2.2603 |
| CHB | FAM72A | 206326179 | 2.2985 | 8.4708  | -2.1608 |
| CHB | FAM72A | 206331179 | 1.0367 | 4.4048  | -2.1194 |
| CHB | FAM72A | 206336179 | 0.0386 | 0.5082  | -1.4741 |
| CHB | FAM72A | 206341179 | 0      | 0       | 0       |
| CHB | FAM72A | 206346179 | 0      | 0       | 0       |
| CHB | FAM72A | 206351179 | 0      | 0       | 0       |
| CHB | FAM72A | 206356179 | 0      | 0       | 0       |
| CHB | FAM72A | 206361179 | 0      | 0       | 0       |
| CHB | FAM72A | 206366179 | 0      | 0       | 0       |
| CHB | FAM72A | 206371179 | 0      | 0       | 0       |
| CHB | FAM72A | 206376179 | 0      | 0       | 0       |
| CHB | FAM72A | 206381179 | 0      | 0       | 0       |
| CHB | FAM72A | 206386179 | 0      | 0       | 0       |
| CHB | FAM72A | 206391179 | 0      | 0       | 0       |
| CHB | FAM72A | 206396179 | 0      | 0       | 0       |
| CHB | FAM72A | 206401179 | 0      | 0       | 0       |
| CHB | FAM72A | 206406179 | 0      | 0       | 0       |
| CHB | FAM72A | 206411179 | 0      | 0       | 0       |
| CHB | FAM72A | 206416179 | 0      | 0       | 0       |
| CHB | FAM72A | 206421179 | 0      | 0       | 0       |
| CHB | FAM72A | 206426179 | 0      | 0       | 0       |
| CHB | FAM72A | 206431179 | 0      | 0       | 0       |
| CHB | FAM72A | 206436179 | 0      | 0       | 0       |
| CHB | FAM72A | 206441179 | 0      | 0       | 0       |
| CHB | FAM72A | 206446179 | 0      | 0       | 0       |
| CHB | FAM72A | 206451179 | 0      | 0       | 0       |
| CHB | FAM72A | 206456179 | 0      | 0       | 0       |
| CHB | FAM72A | 206461179 | 0      | 0       | 0       |
| CHB | FAM72A | 206466179 | 0      | 0       | 0       |
| CHB | FAM72A | 206471179 | 0      | 0       | 0       |
| CHB | FAM72A | 206476179 | 0      | 0       | 0       |
| CHB | FAM72A | 206481179 | 0.5722 | 2.2024  | -1.8254 |
| CHB | FAM72A | 206486179 | 1.7658 | 3.5577  | -1.3542 |
| CHB | FAM72A | 206491179 | 1.8915 | 3.2189  | -1.0913 |
| CHB | FAM72A | 206496179 | 1.422  | 3.3883  | -1.5485 |
| CHB | FAM72A | 206501179 | 0.7719 | 1.6942  | -1.2657 |
| CHB | FAM72A | 206506179 | 0.3219 | 1.8636  | -1.967  |
| CHB | FAM72A | 206511179 | 1.712  | 4.913   | -1.831  |
| CHB | FAM72A | 206516179 | 2.6598 | 6.0989  | -1.6234 |
| CHB | FAM72A | 206521179 | 2.5024 | 4.4048  | -1.1971 |
| CHB | FAM72A | 206526179 | 2.5085 | 3.8965  | -0.9708 |
| CHB | FAM72A | 206531179 | 1.6269 | 5.2519  | -1.9551 |
| CHB | FAM72A | 206536179 | 2.4289 | 4.7436  | -1.3654 |
| CHB | FAM72A | 206541179 | 3.6073 | 3.7271  | -0.087  |
| CHB | FAM72A | 206546179 | 1.9341 | 3.7271  | -1.3026 |

## 2\_TajimasD\_data

|     |        |           |         |         |         |
|-----|--------|-----------|---------|---------|---------|
| CHB | FAM72A | 206551179 | 0.9328  | 2.8801  | -1.7557 |
| CHB | FAM72A | 206556179 | 1.0095  | 3.3883  | -1.8734 |
| CHB | FAM72A | 206561179 | 1.1342  | 3.7271  | -1.8837 |
| CHB | FAM72A | 206566179 | 1.4997  | 3.8965  | -1.6764 |
| CHB | FAM72A | 206571179 | 0.8766  | 3.5577  | -2.0262 |
| CHB | FAM72A | 206576179 | 0.7245  | 2.2024  | -1.6548 |
| CHB | FAM72A | 206581179 | 1.6929  | 3.5577  | -1.4093 |
| CHB | FAM72A | 206586179 | 1.7381  | 6.6072  | -2.1386 |
| CHB | FAM72A | 206591179 | 2.7986  | 9.8261  | -2.1441 |
| CHB | FAM72A | 206596179 | 4.6699  | 11.8591 | -1.8393 |
| CHB | FAM72A | 206601179 | 4.7719  | 11.3508 | -1.7539 |
| CHB | FAM72A | 206606179 | 3.2688  | 8.6402  | -1.8463 |
| CHB | FAM72A | 206611179 | 3.0415  | 7.7931  | -1.7959 |
| CHB | FAM72A | 206616179 | 4.2256  | 8.6402  | -1.5175 |
| CHB | FAM72A | 206621179 | 9.8799  | 11.012  | -0.3105 |
| CHB | FAM72A | 206626179 | 10.2283 | 8.979   | 0.4144  |
| CHB | FAM72A | 206631179 | 5.0434  | 5.5907  | -0.2792 |
| CHB | FAM72A | 206636179 | 6.4578  | 8.6402  | -0.7502 |
| CHB | FAM72A | 206641179 | 8.4118  | 10.8426 | -0.6765 |
| CHB | FAM72A | 206646179 | 10.1359 | 12.1979 | -0.5137 |
| CHB | FAM72A | 206651179 | 10.2956 | 13.2144 | -0.6742 |
| CHB | FAM72A | 206656179 | 7.6918  | 10.3343 | -0.7692 |
| CHB | FAM72A | 206661179 | 7.1976  | 8.1319  | -0.3396 |
| CHB | FAM72A | 206666179 | 10.6345 | 10.1649 | 0.1388  |
| CHB | FAM72A | 206671179 | 10.9372 | 11.012  | -0.0205 |
| CHB | FAM72A | 206676179 | 10.5309 | 10.3343 | 0.0572  |
| CHB | FAM72A | 206681179 | 9.9713  | 9.1484  | 0.2683  |
| CHB | FAM72A | 206686179 | 5.348   | 7.1154  | -0.7258 |
| CHB | FAM72A | 206691179 | 6.2145  | 8.6402  | -0.8338 |
| CHB | FAM72A | 206696179 | 7.4215  | 9.9955  | -0.7729 |
| YRI | FAM72A | 205691179 | 6.3972  | 9.2434  | -0.916  |
| YRI | FAM72A | 205696179 | 7.2374  | 11.4282 | -1.1064 |
| YRI | FAM72A | 205701179 | 5.4874  | 10.4199 | -1.4199 |
| YRI | FAM72A | 205706179 | 4.8223  | 10.2518 | -1.5869 |
| YRI | FAM72A | 205711179 | 10.472  | 13.613  | -0.703  |
| YRI | FAM72A | 205716179 | 11.6001 | 13.9492 | -0.5137 |
| YRI | FAM72A | 205721179 | 11.6408 | 13.445  | -0.4086 |
| YRI | FAM72A | 205726179 | 12.6886 | 12.9408 | -0.0592 |
| YRI | FAM72A | 205731179 | 13.1591 | 11.9324 | 0.311   |
| YRI | FAM72A | 205736179 | 17.6538 | 13.9492 | 0.8102  |
| YRI | FAM72A | 205741179 | 15.4729 | 15.1256 | 0.0703  |
| YRI | FAM72A | 205746179 | 8.3958  | 15.1256 | -1.3627 |
| YRI | FAM72A | 205751179 | 13.0368 | 16.134  | -0.5897 |
| YRI | FAM72A | 205756179 | 14.6495 | 14.1172 | 0.1151  |
| YRI | FAM72A | 205761179 | 10.9677 | 12.1005 | -0.2834 |
| YRI | FAM72A | 205766179 | 8.7016  | 10.5879 | -0.5349 |
| YRI | FAM72A | 205771179 | 9.248   | 10.924  | -0.4616 |
| YRI | FAM72A | 205776179 | 9.8531  | 12.2685 | -0.5965 |
| YRI | FAM72A | 205781179 | 5.953   | 11.5963 | -1.4695 |



## 2\_TajimasD\_data

|     |        |           |         |         |         |
|-----|--------|-----------|---------|---------|---------|
| YRI | FAM72A | 205786179 | 7.2499  | 10.756  | -0.9798 |
| YRI | FAM72A | 205791179 | 10.5264 | 9.7476  | 0.2386  |
| YRI | FAM72A | 205796179 | 10.1927 | 9.5795  | 0.1909  |
| YRI | FAM72A | 205801179 | 5.4176  | 7.8989  | -0.9231 |
| YRI | FAM72A | 205806179 | 5.7035  | 8.4031  | -0.9488 |
| YRI | FAM72A | 205811179 | 8.4756  | 11.9324 | -0.8763 |
| YRI | FAM72A | 205816179 | 9.992   | 14.1172 | -0.892  |
| YRI | FAM72A | 205821179 | 10.5247 | 16.4701 | -1.1099 |
| YRI | FAM72A | 205826179 | 9.2265  | 14.9575 | -1.1729 |
| YRI | FAM72A | 205831179 | 7.0183  | 12.1005 | -1.2715 |
| YRI | FAM72A | 205836179 | 6.6565  | 14.4534 | -1.6486 |
| YRI | FAM72A | 205841179 | 9.5026  | 15.9659 | -1.243  |
| YRI | FAM72A | 205846179 | 12.398  | 16.302  | -0.736  |
| YRI | FAM72A | 205851179 | 11.5734 | 16.6382 | -0.9364 |
| YRI | FAM72A | 205856179 | 10.398  | 15.6298 | -1.0268 |
| YRI | FAM72A | 205861179 | 9.8268  | 13.613  | -0.8474 |
| YRI | FAM72A | 205866179 | 9.8467  | 11.7644 | -0.4927 |
| YRI | FAM72A | 205871179 | 9.5456  | 11.7644 | -0.57   |
| YRI | FAM72A | 205876179 | 8.0951  | 13.7811 | -1.2579 |
| YRI | FAM72A | 205881179 | 9.8066  | 14.9575 | -1.0542 |
| YRI | FAM72A | 205886179 | 13.9249 | 17.3104 | -0.6026 |
| YRI | FAM72A | 205891179 | 15.9716 | 17.4785 | -0.2658 |
| YRI | FAM72A | 205896179 | 15.8718 | 16.134  | -0.0499 |
| YRI | FAM72A | 205901179 | 11.7501 | 14.4534 | -0.5716 |
| YRI | FAM72A | 205906179 | 13.6772 | 16.6382 | -0.5474 |
| YRI | FAM72A | 205911179 | 16.5439 | 17.3104 | -0.1364 |
| YRI | FAM72A | 205916179 | 12.231  | 13.613  | -0.3093 |
| YRI | FAM72A | 205921179 | 7.4183  | 9.0754  | -0.5424 |
| YRI | FAM72A | 205926179 | 2.183   | 2.1848  | -0.002  |
| YRI | FAM72A | 205931179 | 0       | 0       | 0       |
| YRI | FAM72A | 205936179 | 0       | 0       | 0       |
| YRI | FAM72A | 205941179 | 0       | 0       | 0       |
| YRI | FAM72A | 205946179 | 0       | 0       | 0       |
| YRI | FAM72A | 205951179 | 0       | 0       | 0       |
| YRI | FAM72A | 205956179 | 0       | 0       | 0       |
| YRI | FAM72A | 205961179 | 0       | 0       | 0       |
| YRI | FAM72A | 205966179 | 0       | 0       | 0       |
| YRI | FAM72A | 205971179 | 0       | 0       | 0       |
| YRI | FAM72A | 205976179 | 0       | 0       | 0       |
| YRI | FAM72A | 205981179 | 0       | 0       | 0       |
| YRI | FAM72A | 205986179 | 0       | 0       | 0       |
| YRI | FAM72A | 205991179 | 0       | 0       | 0       |
| YRI | FAM72A | 205996179 | 0       | 0       | 0       |
| YRI | FAM72A | 206001179 | 0       | 0       | 0       |
| YRI | FAM72A | 206006179 | 0       | 0       | 0       |
| YRI | FAM72A | 206011179 | 0       | 0       | 0       |
| YRI | FAM72A | 206016179 | 0       | 0       | 0       |
| YRI | FAM72A | 206021179 | 0       | 0       | 0       |
| YRI | FAM72A | 206026179 | 0       | 0       | 0       |

## 2\_TajimasD\_data

|     |        |           |         |         |         |
|-----|--------|-----------|---------|---------|---------|
| YRI | FAM72A | 206031179 | 0       | 0       | 0       |
| YRI | FAM72A | 206036179 | 0       | 0       | 0       |
| YRI | FAM72A | 206041179 | 0       | 0       | 0       |
| YRI | FAM72A | 206046179 | 0       | 0       | 0       |
| YRI | FAM72A | 206051179 | 0       | 0       | 0       |
| YRI | FAM72A | 206056179 | 0       | 0       | 0       |
| YRI | FAM72A | 206061179 | 0       | 0       | 0       |
| YRI | FAM72A | 206066179 | 0       | 0       | 0       |
| YRI | FAM72A | 206071179 | 3.0707  | 3.0251  | 0.0393  |
| YRI | FAM72A | 206076179 | 5.2291  | 5.7141  | -0.2418 |
| YRI | FAM72A | 206081179 | 7.7016  | 7.8989  | -0.0734 |
| YRI | FAM72A | 206086179 | 7.3602  | 8.067   | -0.2579 |
| YRI | FAM72A | 206091179 | 4.0151  | 5.5461  | -0.784  |
| YRI | FAM72A | 206096179 | 6.528   | 6.7225  | -0.0838 |
| YRI | FAM72A | 206101179 | 6.6791  | 7.2267  | -0.221  |
| YRI | FAM72A | 206106179 | 2.981   | 5.0419  | -1.1483 |
| YRI | FAM72A | 206111179 | 1.9645  | 5.7141  | -1.8698 |
| YRI | FAM72A | 206116179 | 3.6179  | 7.0586  | -1.4184 |
| YRI | FAM72A | 206121179 | 2.9357  | 5.378   | -1.2853 |
| YRI | FAM72A | 206126179 | 2.0392  | 4.7057  | -1.5784 |
| YRI | FAM72A | 206131179 | 3.2414  | 5.2099  | -1.0655 |
| YRI | FAM72A | 206136179 | 3.0967  | 5.0419  | -1.0838 |
| YRI | FAM72A | 206141179 | 2.3912  | 4.5377  | -1.3116 |
| YRI | FAM72A | 206146179 | 2.171   | 4.0335  | -1.2602 |
| YRI | FAM72A | 206151179 | 1.3334  | 3.5293  | -1.6649 |
| YRI | FAM72A | 206156179 | 1.2739  | 3.6974  | -1.7664 |
| YRI | FAM72A | 206161179 | 1.9631  | 5.378   | -1.7972 |
| YRI | FAM72A | 206166179 | 2.1481  | 5.378   | -1.6998 |
| YRI | FAM72A | 206171179 | 4.0015  | 6.7225  | -1.1725 |
| YRI | FAM72A | 206176179 | 5.2905  | 8.5712  | -1.1322 |
| YRI | FAM72A | 206181179 | 3.8321  | 6.3864  | -1.1528 |
| YRI | FAM72A | 206186179 | 4.4746  | 6.7225  | -0.9686 |
| YRI | FAM72A | 206191179 | 5.8529  | 10.0837 | -1.2558 |
| YRI | FAM72A | 206196179 | 8.0121  | 13.2769 | -1.2066 |
| YRI | FAM72A | 206201179 | 11.6314 | 15.4617 | -0.7595 |
| YRI | FAM72A | 206206179 | 23.6469 | 21.512  | 0.3083  |
| YRI | FAM72A | 206211179 | 31.3647 | 24.7051 | 0.8411  |
| YRI | FAM72A | 206216179 | 25.0518 | 20.5036 | 0.688   |
| YRI | FAM72A | 206221179 | 18.4437 | 16.9743 | 0.2665  |
| YRI | FAM72A | 206226179 | 21.2442 | 17.4785 | 0.6641  |
| YRI | FAM72A | 206231179 | 20.6198 | 18.1507 | 0.42    |
| YRI | FAM72A | 206236179 | 17.2667 | 18.4868 | -0.2039 |
| YRI | FAM72A | 206241179 | 17.0003 | 18.1507 | -0.1957 |
| YRI | FAM72A | 206246179 | 11.26   | 13.7811 | -0.5577 |
| YRI | FAM72A | 206251179 | 6.8344  | 10.756  | -1.0959 |
| YRI | FAM72A | 206256179 | 7.1353  | 10.924  | -1.0435 |
| YRI | FAM72A | 206261179 | 7.892   | 10.924  | -0.8351 |
| YRI | FAM72A | 206266179 | 9.7516  | 12.4366 | -0.6546 |
| YRI | FAM72A | 206271179 | 10.1258 | 12.9408 | -0.661  |

## 2\_TajimasD\_data

|     |        |           |         |         |         |
|-----|--------|-----------|---------|---------|---------|
| YRI | FAM72A | 206276179 | 11.567  | 15.4617 | -0.7723 |
| YRI | FAM72A | 206281179 | 14.0591 | 16.302  | -0.4228 |
| YRI | FAM72A | 206286179 | 11.3635 | 15.1256 | -0.7618 |
| YRI | FAM72A | 206291179 | 11.3665 | 16.134  | -0.9077 |
| YRI | FAM72A | 206296179 | 12.9889 | 13.613  | -0.1397 |
| YRI | FAM72A | 206301179 | 18.2289 | 14.7895 | 0.7115  |
| YRI | FAM72A | 206306179 | 19.2802 | 16.4701 | 0.5246  |
| YRI | FAM72A | 206311179 | 14.7582 | 16.302  | -0.291  |
| YRI | FAM72A | 206316179 | 11.3358 | 14.9575 | -0.7412 |
| YRI | FAM72A | 206321179 | 10.6324 | 14.7895 | -0.86   |
| YRI | FAM72A | 206326179 | 12.1674 | 16.9743 | -0.8718 |
| YRI | FAM72A | 206331179 | 7.1205  | 10.5879 | -0.9833 |
| YRI | FAM72A | 206336179 | 0.8795  | 1.8487  | -1.2397 |
| YRI | FAM72A | 206341179 | 0       | 0       | 0       |
| YRI | FAM72A | 206346179 | 0       | 0       | 0       |
| YRI | FAM72A | 206351179 | 0       | 0       | 0       |
| YRI | FAM72A | 206356179 | 0       | 0       | 0       |
| YRI | FAM72A | 206361179 | 0       | 0       | 0       |
| YRI | FAM72A | 206366179 | 0       | 0       | 0       |
| YRI | FAM72A | 206371179 | 0       | 0       | 0       |
| YRI | FAM72A | 206376179 | 0       | 0       | 0       |
| YRI | FAM72A | 206381179 | 0       | 0       | 0       |
| YRI | FAM72A | 206386179 | 0       | 0       | 0       |
| YRI | FAM72A | 206391179 | 0       | 0       | 0       |
| YRI | FAM72A | 206396179 | 0       | 0       | 0       |
| YRI | FAM72A | 206401179 | 0       | 0       | 0       |
| YRI | FAM72A | 206406179 | 0       | 0       | 0       |
| YRI | FAM72A | 206411179 | 0       | 0       | 0       |
| YRI | FAM72A | 206416179 | 0       | 0       | 0       |
| YRI | FAM72A | 206421179 | 0       | 0       | 0       |
| YRI | FAM72A | 206426179 | 0       | 0       | 0       |
| YRI | FAM72A | 206431179 | 0       | 0       | 0       |
| YRI | FAM72A | 206436179 | 0       | 0       | 0       |
| YRI | FAM72A | 206441179 | 0       | 0       | 0       |
| YRI | FAM72A | 206446179 | 0       | 0       | 0       |
| YRI | FAM72A | 206451179 | 0       | 0       | 0       |
| YRI | FAM72A | 206456179 | 0       | 0       | 0       |
| YRI | FAM72A | 206461179 | 0       | 0       | 0       |
| YRI | FAM72A | 206466179 | 0       | 0       | 0       |
| YRI | FAM72A | 206471179 | 0       | 0       | 0       |
| YRI | FAM72A | 206476179 | 0       | 0       | 0       |
| YRI | FAM72A | 206481179 | 2.7929  | 5.8822  | -1.5011 |
| YRI | FAM72A | 206486179 | 5.3107  | 8.9073  | -1.1979 |
| YRI | FAM72A | 206491179 | 5.2542  | 5.378   | -0.0652 |
| YRI | FAM72A | 206496179 | 4.33    | 5.0419  | -0.3966 |
| YRI | FAM72A | 206501179 | 1.8072  | 2.8571  | -0.9495 |
| YRI | FAM72A | 206506179 | 1.55    | 2.5209  | -0.9723 |
| YRI | FAM72A | 206511179 | 4.9017  | 7.3947  | -0.9851 |
| YRI | FAM72A | 206516179 | 5.2226  | 8.7392  | -1.192  |

## 2\_TajimasD\_data

|     |         |           |         |         |         |
|-----|---------|-----------|---------|---------|---------|
| YRI | FAM72A  | 206521179 | 4.2763  | 6.5544  | -1.0044 |
| YRI | FAM72A  | 206526179 | 4.5594  | 7.3947  | -1.1204 |
| YRI | FAM72A  | 206531179 | 3.3218  | 9.4115  | -1.9273 |
| YRI | FAM72A  | 206536179 | 3.5144  | 8.067   | -1.6613 |
| YRI | FAM72A  | 206541179 | 5.8015  | 6.8906  | -0.4589 |
| YRI | FAM72A  | 206546179 | 5.1114  | 6.3864  | -0.5754 |
| YRI | FAM72A  | 206551179 | 2.5579  | 5.378   | -1.4842 |
| YRI | FAM72A  | 206556179 | 3.715   | 7.5628  | -1.4896 |
| YRI | FAM72A  | 206561179 | 3.9029  | 7.8989  | -1.4866 |
| YRI | FAM72A  | 206566179 | 4.0399  | 7.0586  | -1.2445 |
| YRI | FAM72A  | 206571179 | 3.8389  | 6.2183  | -1.1    |
| YRI | FAM72A  | 206576179 | 1.962   | 3.5293  | -1.1883 |
| YRI | FAM72A  | 206581179 | 3.825   | 5.7141  | -0.942  |
| YRI | FAM72A  | 206586179 | 8.2785  | 11.9324 | -0.9263 |
| YRI | FAM72A  | 206591179 | 11.3397 | 15.2937 | -0.7923 |
| YRI | FAM72A  | 206596179 | 12.0349 | 16.9743 | -0.8959 |
| YRI | FAM72A  | 206601179 | 9.8339  | 17.1423 | -1.3131 |
| YRI | FAM72A  | 206606179 | 6.6334  | 13.445  | -1.5426 |
| YRI | FAM72A  | 206611179 | 5.1564  | 10.4199 | -1.5152 |
| YRI | FAM72A  | 206616179 | 6.6123  | 10.924  | -1.1875 |
| YRI | FAM72A  | 206621179 | 14.478  | 15.4617 | -0.1951 |
| YRI | FAM72A  | 206626179 | 13.2936 | 12.9408 | 0.0828  |
| YRI | FAM72A  | 206631179 | 7.169   | 9.2434  | -0.6676 |
| YRI | FAM72A  | 206636179 | 9.8636  | 12.7727 | -0.6916 |
| YRI | FAM72A  | 206641179 | 11.0087 | 15.4617 | -0.883  |
| YRI | FAM72A  | 206646179 | 12.0552 | 18.1507 | -1.0368 |
| YRI | FAM72A  | 206651179 | 12.9808 | 17.6465 | -0.8153 |
| YRI | FAM72A  | 206656179 | 9.2881  | 13.445  | -0.9414 |
| YRI | FAM72A  | 206661179 | 7.6475  | 12.2685 | -1.1411 |
| YRI | FAM72A  | 206666179 | 15.2299 | 14.9575 | 0.0557  |
| YRI | FAM72A  | 206671179 | 16.6816 | 13.9492 | 0.5976  |
| YRI | FAM72A  | 206676179 | 13.6847 | 13.1089 | 0.1336  |
| YRI | FAM72A  | 206681179 | 12.1631 | 12.7727 | -0.1449 |
| YRI | FAM72A  | 206686179 | 7.8596  | 10.0837 | -0.6601 |
| YRI | FAM72A  | 206691179 | 8.6672  | 12.1005 | -0.8589 |
| YRI | FAM72A  | 206696179 | 10.2958 | 14.7895 | -0.9296 |
| CEU | FAM75A1 | 38860667  | 0.1093  | 0.6822  | -1.496  |
| CEU | FAM75A1 | 38865667  | 0.4422  | 1.1939  | -1.3395 |
| CEU | FAM75A1 | 38870667  | 1.5473  | 1.3645  | 0.2957  |
| CEU | FAM75A1 | 38875667  | 4.455   | 2.729   | 1.6314  |
| CEU | FAM75A1 | 38880667  | 3.7417  | 2.5584  | 1.1788  |
| CEU | FAM75A1 | 38885667  | 1.3465  | 1.5351  | -0.2797 |
| CEU | FAM75A1 | 38890667  | 0.8555  | 1.0234  | -0.3336 |
| CEU | FAM75A1 | 38895667  | 0.7355  | 0.8528  | -0.2642 |
| CEU | FAM75A1 | 38900667  | 0.7456  | 1.0234  | -0.552  |
| CEU | FAM75A1 | 38905667  | 0.0101  | 0.1706  | -0.9534 |
| CEU | FAM75A1 | 38910667  | 1.9256  | 1.1939  | 1.3039  |
| CEU | FAM75A1 | 38915667  | 5.8487  | 5.6286  | 0.112   |
| CEU | FAM75A1 | 38920667  | 6.5912  | 7.6753  | -0.4167 |

## 2\_TajimasD\_data

|     |         |          |         |         |         |
|-----|---------|----------|---------|---------|---------|
| CEU | FAM75A1 | 38925667 | 3.1394  | 3.7524  | -0.4441 |
| CEU | FAM75A1 | 38930667 | 2.6162  | 2.3879  | 0.2404  |
| CEU | FAM75A1 | 38935667 | 2.4426  | 2.5584  | -0.1154 |
| CEU | FAM75A1 | 38940667 | 0.2977  | 0.6822  | -1.004  |
| CEU | FAM75A1 | 38945667 | 0.7374  | 1.0234  | -0.5683 |
| CEU | FAM75A1 | 38950667 | 1.2212  | 2.0467  | -0.9823 |
| CEU | FAM75A1 | 38955667 | 2.3715  | 2.729   | -0.3379 |
| CEU | FAM75A1 | 38960667 | 2.9942  | 2.8996  | 0.0851  |
| CEU | FAM75A1 | 38965667 | 1.638   | 2.0467  | -0.4863 |
| CEU | FAM75A1 | 38970667 | 0.6982  | 1.0234  | -0.6462 |
| CEU | FAM75A1 | 38975667 | 0.1971  | 0.6822  | -1.2667 |
| CEU | FAM75A1 | 38980667 | 0.0701  | 0.6822  | -1.5984 |
| CEU | FAM75A1 | 38985667 | 0.1488  | 0.6822  | -1.3929 |
| CEU | FAM75A1 | 38990667 | 1.1177  | 2.5584  | -1.4352 |
| CEU | FAM75A1 | 38995667 | 3.7188  | 5.458   | -0.9092 |
| CEU | FAM75A1 | 39000667 | 6.6298  | 7.6753  | -0.4019 |
| CEU | FAM75A1 | 39005667 | 10.0429 | 11.9394 | -0.4835 |
| CEU | FAM75A1 | 39010667 | 12.5141 | 14.6684 | -0.452  |
| CEU | FAM75A1 | 39015667 | 12.0534 | 13.3039 | -0.2878 |
| CEU | FAM75A1 | 39020667 | 11.4467 | 12.6216 | -0.2843 |
| CEU | FAM75A1 | 39025667 | 7.7963  | 9.8926  | -0.6374 |
| CEU | FAM75A1 | 39030667 | 2.6502  | 5.7991  | -1.5596 |
| CEU | FAM75A1 | 39035667 | 2.6667  | 6.1402  | -1.6345 |
| CEU | FAM75A1 | 39040667 | 3.6482  | 7.6753  | -1.5479 |
| CEU | FAM75A1 | 39045667 | 3.5062  | 6.8225  | -1.419  |
| CEU | FAM75A1 | 39050667 | 5.3521  | 8.187   | -1.027  |
| CEU | FAM75A1 | 39055667 | 8.1657  | 12.2805 | -1.0216 |
| CEU | FAM75A1 | 39060667 | 5.8442  | 9.2104  | -1.0938 |
| CEU | FAM75A1 | 39065667 | 1.2905  | 2.3879  | -1.1557 |
| CEU | FAM75A1 | 39070667 | 4.7108  | 4.6052  | 0.0641  |
| CEU | FAM75A1 | 39075667 | 11.0818 | 10.5749 | 0.1448  |
| CEU | FAM75A1 | 39080667 | 17.1004 | 14.8389 | 0.4693  |
| CEU | FAM75A1 | 39085667 | 18.7225 | 15.6917 | 0.5963  |
| CEU | FAM75A1 | 39090667 | 18.5945 | 13.9861 | 1.0116  |
| CEU | FAM75A1 | 39095667 | 23.2033 | 14.8389 | 1.7357  |
| CEU | FAM75A1 | 39100667 | 17.7627 | 15.3506 | 0.4846  |
| CEU | FAM75A1 | 39105667 | 7.2587  | 11.9394 | -1.1934 |
| CEU | FAM75A1 | 39110667 | 5.7007  | 10.4043 | -1.3645 |
| CEU | FAM75A1 | 39115667 | 8.2094  | 11.7688 | -0.9199 |
| CEU | FAM75A1 | 39120667 | 7.6871  | 11.4277 | -0.9938 |
| CEU | FAM75A1 | 39125667 | 5.5005  | 9.8926  | -1.3355 |
| CEU | FAM75A1 | 39130667 | 6.0237  | 9.3809  | -1.0725 |
| CEU | FAM75A1 | 39135667 | 7.3452  | 10.916  | -0.9904 |
| CEU | FAM75A1 | 39140667 | 7.7148  | 9.2104  | -0.486  |
| CEU | FAM75A1 | 39145667 | 9.6584  | 10.2337 | -0.1695 |
| CEU | FAM75A1 | 39150667 | 10.9817 | 14.3272 | -0.7178 |
| CEU | FAM75A1 | 39155667 | 7.3449  | 12.2805 | -1.2254 |
| CEU | FAM75A1 | 39160667 | 4.6271  | 9.7221  | -1.5745 |
| CEU | FAM75A1 | 39165667 | 4.2397  | 8.3576  | -1.4638 |

## 2\_TajimasD\_data

|     |         |          |        |        |         |
|-----|---------|----------|--------|--------|---------|
| CEU | FAM75A1 | 39170667 | 2.6054 | 6.4814 | -1.7373 |
| CEU | FAM75A1 | 39175667 | 2.0971 | 6.6519 | -1.9942 |
| CEU | FAM75A1 | 39180667 | 2.3286 | 5.9697 | -1.7572 |
| CEU | FAM75A1 | 39185667 | 1.0293 | 2.2173 | -1.3272 |
| CEU | FAM75A1 | 39190667 | 0      | 0      | 0       |
| CEU | FAM75A1 | 39195667 | 0      | 0      | 0       |
| CEU | FAM75A1 | 39200667 | 0.3562 | 0.3411 | 0.0605  |
| CEU | FAM75A1 | 39205667 | 0.3562 | 0.3411 | 0.0605  |
| CEU | FAM75A1 | 39210667 | 0.3004 | 0.1706 | 0.771   |
| CEU | FAM75A1 | 39215667 | 0.4585 | 0.3411 | 0.4706  |
| CEU | FAM75A1 | 39220667 | 0.1581 | 0.1706 | -0.0743 |
| CEU | FAM75A1 | 39225667 | 0.8543 | 0.5117 | 1.0745  |
| CEU | FAM75A1 | 39230667 | 0.8543 | 0.5117 | 1.0745  |
| CEU | FAM75A1 | 39235667 | 0      | 0      | 0       |
| CEU | FAM75A1 | 39240667 | 0.3131 | 0.3411 | -0.1122 |
| CEU | FAM75A1 | 39245667 | 1.3179 | 0.6822 | 1.66    |
| CEU | FAM75A1 | 39250667 | 1.3051 | 0.5117 | 2.4883  |
| CEU | FAM75A1 | 39255667 | 1.3051 | 0.5117 | 2.4883  |
| CEU | FAM75A1 | 39260667 | 1.0047 | 0.3411 | 2.6602  |
| CEU | FAM75A1 | 39265667 | 0.9528 | 0.6822 | 0.7066  |
| CEU | FAM75A1 | 39270667 | 0.9728 | 0.8528 | 0.2702  |
| CEU | FAM75A1 | 39275667 | 0.4343 | 0.5117 | -0.2427 |
| CEU | FAM75A1 | 39280667 | 0.4143 | 0.3411 | 0.2934  |
| CEU | FAM75A1 | 39285667 | 1.3121 | 0.6822 | 1.6449  |
| CEU | FAM75A1 | 39290667 | 1.3222 | 0.8528 | 1.0571  |
| CEU | FAM75A1 | 39295667 | 0.9458 | 1.8762 | -1.1846 |
| CEU | FAM75A1 | 39300667 | 1.2426 | 1.8762 | -0.8067 |
| CEU | FAM75A1 | 39305667 | 0.3069 | 0.1706 | 0.8097  |
| CEU | FAM75A1 | 39310667 | 0      | 0      | 0       |
| CEU | FAM75A1 | 39315667 | 0      | 0      | 0       |
| CEU | FAM75A1 | 39320667 | 0      | 0      | 0       |
| CEU | FAM75A1 | 39325667 | 0      | 0      | 0       |
| CEU | FAM75A1 | 39330667 | 0      | 0      | 0       |
| CEU | FAM75A1 | 39335667 | 0      | 0      | 0       |
| CEU | FAM75A1 | 39340667 | 0      | 0      | 0       |
| CEU | FAM75A1 | 39345667 | 0      | 0      | 0       |
| CEU | FAM75A1 | 39350667 | 1.2158 | 1.0234 | 0.3823  |
| CEU | FAM75A1 | 39355667 | 2.1101 | 2.3879 | -0.2926 |
| CEU | FAM75A1 | 39360667 | 0.8942 | 1.3645 | -0.7608 |
| CEU | FAM75A1 | 39365667 | 0.0101 | 0.1706 | -0.9534 |
| CEU | FAM75A1 | 39370667 | 0.2406 | 0.5117 | -0.8502 |
| CEU | FAM75A1 | 39375667 | 0.5086 | 0.5117 | -0.0097 |
| CEU | FAM75A1 | 39380667 | 0.2781 | 0.1706 | 0.6386  |
| CEU | FAM75A1 | 39385667 | 0.0101 | 0.1706 | -0.9534 |
| CEU | FAM75A1 | 39390667 | 0.0101 | 0.1706 | -0.9534 |
| CEU | FAM75A1 | 39395667 | 0      | 0      | 0       |
| CEU | FAM75A1 | 39400667 | 0      | 0      | 0       |
| CEU | FAM75A1 | 39405667 | 0.0101 | 0.1706 | -0.9534 |
| CEU | FAM75A1 | 39410667 | 0.0303 | 0.3411 | -1.2459 |

## 2\_TajimasD\_data

|     |         |          |        |        |         |
|-----|---------|----------|--------|--------|---------|
| CEU | FAM75A1 | 39415667 | 0.0202 | 0.1706 | -0.8934 |
| CEU | FAM75A1 | 39420667 | 0      | 0      | 0       |
| CEU | FAM75A1 | 39425667 | 0      | 0      | 0       |
| CEU | FAM75A1 | 39430667 | 0      | 0      | 0       |
| CEU | FAM75A1 | 39435667 | 0      | 0      | 0       |
| CEU | FAM75A1 | 39440667 | 0      | 0      | 0       |
| CEU | FAM75A1 | 39445667 | 0.0977 | 0.3411 | -0.9757 |
| CEU | FAM75A1 | 39450667 | 0.128  | 0.6822 | -1.4472 |
| CEU | FAM75A1 | 39455667 | 0.1583 | 0.6822 | -1.3681 |
| CEU | FAM75A1 | 39460667 | 0.2882 | 0.6822 | -1.0289 |
| CEU | FAM75A1 | 39465667 | 0.1602 | 0.3411 | -0.7252 |
| CEU | FAM75A1 | 39470667 | 0      | 0      | 0       |
| CEU | FAM75A1 | 39475667 | 0.0202 | 0.3411 | -1.2864 |
| CEU | FAM75A1 | 39480667 | 0.2639 | 0.8528 | -1.3262 |
| CEU | FAM75A1 | 39485667 | 0.3034 | 0.8528 | -1.2372 |
| CEU | FAM75A1 | 39490667 | 0.0598 | 0.3411 | -1.1277 |
| CEU | FAM75A1 | 39495667 | 0      | 0      | 0       |
| CEU | FAM75A1 | 39500667 | 0      | 0      | 0       |
| CEU | FAM75A1 | 39505667 | 0      | 0      | 0       |
| CEU | FAM75A1 | 39510667 | 0      | 0      | 0       |
| CEU | FAM75A1 | 39515667 | 0      | 0      | 0       |
| CEU | FAM75A1 | 39520667 | 0      | 0      | 0       |
| CEU | FAM75A1 | 39525667 | 0      | 0      | 0       |
| CEU | FAM75A1 | 39530667 | 0      | 0      | 0       |
| CEU | FAM75A1 | 39535667 | 0      | 0      | 0       |
| CEU | FAM75A1 | 39540667 | 0      | 0      | 0       |
| CEU | FAM75A1 | 39545667 | 0      | 0      | 0       |
| CEU | FAM75A1 | 39550667 | 0.9858 | 1.3645 | -0.6127 |
| CEU | FAM75A1 | 39555667 | 2.283  | 2.8996 | -0.5545 |
| CEU | FAM75A1 | 39560667 | 1.2973 | 1.5351 | -0.3526 |
| CEU | FAM75A1 | 39565667 | 0.0961 | 0.1706 | -0.4425 |
| CEU | FAM75A1 | 39570667 | 0.1361 | 0.3411 | -0.8218 |
| CEU | FAM75A1 | 39575667 | 0.0903 | 0.8528 | -1.7171 |
| CEU | FAM75A1 | 39580667 | 0.1375 | 0.8528 | -1.6108 |
| CEU | FAM75A1 | 39585667 | 0.1173 | 0.5117 | -1.2369 |
| CEU | FAM75A1 | 39590667 | 0.5321 | 0.6822 | -0.392  |
| CEU | FAM75A1 | 39595667 | 0.5121 | 0.5117 | 0.0013  |
| CEU | FAM75A1 | 39600667 | 0.0101 | 0.1706 | -0.9534 |
| CEU | FAM75A1 | 39605667 | 0      | 0      | 0       |
| CEU | FAM75A1 | 39610667 | 0.5032 | 0.1706 | 1.9757  |
| CEU | FAM75A1 | 39615667 | 0.5032 | 0.1706 | 1.9757  |
| CEU | FAM75A1 | 39620667 | 0.0101 | 0.1706 | -0.9534 |
| CEU | FAM75A1 | 39625667 | 0.0101 | 0.1706 | -0.9534 |
| CEU | FAM75A1 | 39630667 | 0.0684 | 0.1706 | -0.6071 |
| CEU | FAM75A1 | 39635667 | 0.0684 | 0.1706 | -0.6071 |
| CEU | FAM75A1 | 39640667 | 0.0101 | 0.1706 | -0.9534 |
| CEU | FAM75A1 | 39645667 | 0.0101 | 0.1706 | -0.9534 |
| CEU | FAM75A1 | 39650667 | 0      | 0      | 0       |
| CEU | FAM75A1 | 39655667 | 0      | 0      | 0       |

## 2\_TajimasD\_data

|     |         |          |        |        |         |
|-----|---------|----------|--------|--------|---------|
| CEU | FAM75A1 | 39660667 | 0.1573 | 0.1706 | -0.079  |
| CEU | FAM75A1 | 39665667 | 0.1573 | 0.1706 | -0.079  |
| CEU | FAM75A1 | 39670667 | 0      | 0      | 0       |
| CEU | FAM75A1 | 39675667 | 0      | 0      | 0       |
| CEU | FAM75A1 | 39680667 | 0      | 0      | 0       |
| CEU | FAM75A1 | 39685667 | 0      | 0      | 0       |
| CEU | FAM75A1 | 39690667 | 0      | 0      | 0       |
| CEU | FAM75A1 | 39695667 | 0      | 0      | 0       |
| CEU | FAM75A1 | 39700667 | 0      | 0      | 0       |
| CEU | FAM75A1 | 39705667 | 0      | 0      | 0       |
| CEU | FAM75A1 | 39710667 | 0      | 0      | 0       |
| CEU | FAM75A1 | 39715667 | 0      | 0      | 0       |
| CEU | FAM75A1 | 39720667 | 0      | 0      | 0       |
| CEU | FAM75A1 | 39725667 | 0.04   | 0.3411 | -1.207  |
| CEU | FAM75A1 | 39730667 | 0.8233 | 1.5351 | -1.0555 |
| CEU | FAM75A1 | 39735667 | 0.7934 | 1.3645 | -0.9239 |
| CEU | FAM75A1 | 39740667 | 0.3861 | 2.0467 | -1.9759 |
| CEU | FAM75A1 | 39745667 | 0.6704 | 2.5584 | -1.8808 |
| CEU | FAM75A1 | 39750667 | 0.2944 | 0.6822 | -1.0127 |
| CEU | FAM75A1 | 39755667 | 0.1833 | 0.1706 | 0.0754  |
| CEU | FAM75A1 | 39760667 | 0.2235 | 0.5117 | -0.9039 |
| CEU | FAM75A1 | 39765667 | 0.1109 | 1.0234 | -1.8132 |
| CEU | FAM75A1 | 39770667 | 0.7196 | 1.7056 | -1.3504 |
| CEU | FAM75A1 | 39775667 | 2.368  | 4.4346 | -1.2967 |
| CEU | FAM75A1 | 39780667 | 2.6316 | 5.1169 | -1.3757 |
| CEU | FAM75A1 | 39785667 | 1.1492 | 2.3879 | -1.3045 |
| CEU | FAM75A1 | 39790667 | 0.5969 | 1.3645 | -1.2418 |
| CEU | FAM75A1 | 39795667 | 0.6641 | 1.7056 | -1.4265 |
| CEU | FAM75A1 | 39800667 | 0.7227 | 2.0467 | -1.5754 |
| CEU | FAM75A1 | 39805667 | 0.556  | 1.5351 | -1.4518 |
| CEU | FAM75A1 | 39810667 | 0.2696 | 0.6822 | -1.0774 |
| CEU | FAM75A1 | 39815667 | 0.5986 | 0.6822 | -0.2183 |
| CEU | FAM75A1 | 39820667 | 0.545  | 0.8528 | -0.6932 |
| CEU | FAM75A1 | 39825667 | 0.1391 | 0.6822 | -1.4182 |
| CEU | FAM75A1 | 39830667 | 0.0602 | 0.3411 | -1.126  |
| CEU | FAM75A1 | 39835667 | 0      | 0      | 0       |
| CEU | FAM75A1 | 39840667 | 0      | 0      | 0       |
| CEU | FAM75A1 | 39845667 | 0.0202 | 0.1706 | -0.8934 |
| CEU | FAM75A1 | 39850667 | 0.0202 | 0.1706 | -0.8934 |
| CEU | FAM75A1 | 39855667 | 0      | 0      | 0       |
| CHB | FAM75A1 | 38860667 | 0.0773 | 1.0165 | -1.8691 |
| CHB | FAM75A1 | 38865667 | 0.1927 | 1.6942 | -2.0606 |
| CHB | FAM75A1 | 38870667 | 0.688  | 1.3553 | -1.0815 |
| CHB | FAM75A1 | 38875667 | 2.4498 | 2.7106 | -0.2471 |
| CHB | FAM75A1 | 38880667 | 2.4911 | 2.5412 | -0.05   |
| CHB | FAM75A1 | 38885667 | 1.0476 | 1.1859 | -0.2469 |
| CHB | FAM75A1 | 38890667 | 0.4531 | 1.0165 | -1.1212 |
| CHB | FAM75A1 | 38895667 | 0.7476 | 1.1859 | -0.7824 |
| CHB | FAM75A1 | 38900667 | 0.8389 | 1.0165 | -0.3534 |



## 2\_TajimasD\_data

|     |         |          |         |         |         |
|-----|---------|----------|---------|---------|---------|
| CHB | FAM75A1 | 38905667 | 0.1108  | 0.1694  | -0.3482 |
| CHB | FAM75A1 | 38910667 | 1.3705  | 1.0165  | 0.7045  |
| CHB | FAM75A1 | 38915667 | 3.5102  | 4.4048  | -0.5629 |
| CHB | FAM75A1 | 38920667 | 4.0725  | 6.6072  | -1.1133 |
| CHB | FAM75A1 | 38925667 | 2.4304  | 4.066   | -1.1029 |
| CHB | FAM75A1 | 38930667 | 2.4866  | 2.033   | 0.5409  |
| CHB | FAM75A1 | 38935667 | 2.0461  | 1.5247  | 0.7746  |
| CHB | FAM75A1 | 38940667 | 0.0571  | 0.3388  | -1.13   |
| CHB | FAM75A1 | 38945667 | 0.5069  | 0.5082  | -0.0041 |
| CHB | FAM75A1 | 38950667 | 1.0491  | 1.0165  | 0.0649  |
| CHB | FAM75A1 | 38955667 | 2.8561  | 2.2024  | 0.732   |
| CHB | FAM75A1 | 38960667 | 3.442   | 2.7106  | 0.693   |
| CHB | FAM75A1 | 38965667 | 1.6615  | 1.6942  | -0.0449 |
| CHB | FAM75A1 | 38970667 | 0.9781  | 1.0165  | -0.0764 |
| CHB | FAM75A1 | 38975667 | 0.5578  | 1.0165  | -0.9128 |
| CHB | FAM75A1 | 38980667 | 0.1131  | 0.6777  | -1.476  |
| CHB | FAM75A1 | 38985667 | 0.2519  | 0.5082  | -0.8046 |
| CHB | FAM75A1 | 38990667 | 3.1949  | 2.8801  | 0.2838  |
| CHB | FAM75A1 | 38995667 | 6.0461  | 5.9295  | 0.0564  |
| CHB | FAM75A1 | 39000667 | 12.5184 | 10.5037 | 0.5776  |
| CHB | FAM75A1 | 39005667 | 23.6598 | 16.4333 | 1.3565  |
| CHB | FAM75A1 | 39010667 | 29.0276 | 19.8216 | 1.4435  |
| CHB | FAM75A1 | 39015667 | 27.4469 | 19.6521 | 1.2324  |
| CHB | FAM75A1 | 39020667 | 24.2733 | 16.2638 | 1.5185  |
| CHB | FAM75A1 | 39025667 | 15.5113 | 11.6896 | 0.9911  |
| CHB | FAM75A1 | 39030667 | 5.1211  | 6.946   | -0.766  |
| CHB | FAM75A1 | 39035667 | 4.8789  | 6.0989  | -0.5759 |
| CHB | FAM75A1 | 39040667 | 7.3713  | 6.946   | 0.1785  |
| CHB | FAM75A1 | 39045667 | 7.5236  | 7.6237  | -0.0386 |
| CHB | FAM75A1 | 39050667 | 9.6056  | 8.979   | 0.2079  |
| CHB | FAM75A1 | 39055667 | 15.185  | 10.6731 | 1.2743  |
| CHB | FAM75A1 | 39060667 | 11.3817 | 8.3013  | 1.0986  |
| CHB | FAM75A1 | 39065667 | 2.1611  | 2.3718  | -0.2224 |
| CHB | FAM75A1 | 39070667 | 5.5205  | 4.7436  | 0.4583  |
| CHB | FAM75A1 | 39075667 | 12.8928 | 9.4872  | 1.0735  |
| CHB | FAM75A1 | 39080667 | 20.2064 | 13.2144 | 1.6151  |
| CHB | FAM75A1 | 39085667 | 22.5049 | 15.4168 | 1.4142  |
| CHB | FAM75A1 | 39090667 | 22.0281 | 13.892  | 1.7924  |
| CHB | FAM75A1 | 39095667 | 27.0706 | 13.892  | 2.9032  |
| CHB | FAM75A1 | 39100667 | 20.0394 | 13.892  | 1.3543  |
| CHB | FAM75A1 | 39105667 | 7.4776  | 10.6731 | -0.9025 |
| CHB | FAM75A1 | 39110667 | 7.6419  | 10.3343 | -0.7837 |
| CHB | FAM75A1 | 39115667 | 11.059  | 12.5367 | -0.3588 |
| CHB | FAM75A1 | 39120667 | 8.6857  | 10.1649 | -0.4373 |
| CHB | FAM75A1 | 39125667 | 6.3887  | 8.979   | -0.8593 |
| CHB | FAM75A1 | 39130667 | 7.321   | 9.4872  | -0.6828 |
| CHB | FAM75A1 | 39135667 | 8.349   | 8.6402  | -0.1001 |
| CHB | FAM75A1 | 39140667 | 8.286   | 7.2848  | 0.4024  |
| CHB | FAM75A1 | 39145667 | 9.6224  | 8.6402  | 0.3376  |

## 2\_TajimasD\_data

|     |         |          |         |         |         |
|-----|---------|----------|---------|---------|---------|
| CHB | FAM75A1 | 39150667 | 11.1619 | 11.5202 | -0.0942 |
| CHB | FAM75A1 | 39155667 | 8.7582  | 11.5202 | -0.7262 |
| CHB | FAM75A1 | 39160667 | 7.91    | 11.012  | -0.8508 |
| CHB | FAM75A1 | 39165667 | 6.8664  | 8.979   | -0.7008 |
| CHB | FAM75A1 | 39170667 | 3.246   | 5.9295  | -1.2991 |
| CHB | FAM75A1 | 39175667 | 2.4704  | 4.913   | -1.3972 |
| CHB | FAM75A1 | 39180667 | 2.6621  | 4.4048  | -1.0966 |
| CHB | FAM75A1 | 39185667 | 1.0779  | 1.8636  | -1.0024 |
| CHB | FAM75A1 | 39190667 | 0       | 0       | 0       |
| CHB | FAM75A1 | 39195667 | 0       | 0       | 0       |
| CHB | FAM75A1 | 39200667 | 0.0388  | 0.3388  | -1.2034 |
| CHB | FAM75A1 | 39205667 | 0.0388  | 0.3388  | -1.2034 |
| CHB | FAM75A1 | 39210667 | 0       | 0       | 0       |
| CHB | FAM75A1 | 39215667 | 0       | 0       | 0       |
| CHB | FAM75A1 | 39220667 | 0       | 0       | 0       |
| CHB | FAM75A1 | 39225667 | 0.4877  | 0.3388  | 0.5973  |
| CHB | FAM75A1 | 39230667 | 0.4877  | 0.3388  | 0.5973  |
| CHB | FAM75A1 | 39235667 | 0       | 0       | 0       |
| CHB | FAM75A1 | 39240667 | 0.0097  | 0.3388  | -1.3201 |
| CHB | FAM75A1 | 39245667 | 1.015   | 0.8471  | 0.3786  |
| CHB | FAM75A1 | 39250667 | 1.0053  | 0.5082  | 1.5605  |
| CHB | FAM75A1 | 39255667 | 1.0048  | 0.3388  | 2.6715  |
| CHB | FAM75A1 | 39260667 | 1.0048  | 0.3388  | 2.6715  |
| CHB | FAM75A1 | 39265667 | 0.1108  | 0.1694  | -0.3482 |
| CHB | FAM75A1 | 39270667 | 0.1108  | 0.1694  | -0.3482 |
| CHB | FAM75A1 | 39275667 | 0.2975  | 0.1694  | 0.7612  |
| CHB | FAM75A1 | 39280667 | 0.2975  | 0.1694  | 0.7612  |
| CHB | FAM75A1 | 39285667 | 1.2227  | 0.8471  | 0.847   |
| CHB | FAM75A1 | 39290667 | 1.2324  | 1.0165  | 0.4297  |
| CHB | FAM75A1 | 39295667 | 0.4923  | 1.1859  | -1.2381 |
| CHB | FAM75A1 | 39300667 | 0.4826  | 1.0165  | -1.0625 |
| CHB | FAM75A1 | 39305667 | 0       | 0       | 0       |
| CHB | FAM75A1 | 39310667 | 0       | 0       | 0       |
| CHB | FAM75A1 | 39315667 | 0       | 0       | 0       |
| CHB | FAM75A1 | 39320667 | 0       | 0       | 0       |
| CHB | FAM75A1 | 39325667 | 0       | 0       | 0       |
| CHB | FAM75A1 | 39330667 | 0       | 0       | 0       |
| CHB | FAM75A1 | 39335667 | 0       | 0       | 0       |
| CHB | FAM75A1 | 39340667 | 0       | 0       | 0       |
| CHB | FAM75A1 | 39345667 | 0       | 0       | 0       |
| CHB | FAM75A1 | 39350667 | 0.7259  | 1.0165  | -0.5783 |
| CHB | FAM75A1 | 39355667 | 1.2629  | 1.6942  | -0.5919 |
| CHB | FAM75A1 | 39360667 | 0.537   | 0.6777  | -0.3678 |
| CHB | FAM75A1 | 39365667 | 0       | 0       | 0       |
| CHB | FAM75A1 | 39370667 | 0.3208  | 0.6777  | -0.933  |
| CHB | FAM75A1 | 39375667 | 0.4885  | 1.0165  | -1.0507 |
| CHB | FAM75A1 | 39380667 | 0.1677  | 0.3388  | -0.6863 |
| CHB | FAM75A1 | 39385667 | 0.0194  | 0.3388  | -1.2812 |
| CHB | FAM75A1 | 39390667 | 0.0194  | 0.3388  | -1.2812 |

## 2\_TajimasD\_data

|     |         |          |        |        |         |
|-----|---------|----------|--------|--------|---------|
| CHB | FAM75A1 | 39395667 | 0      | 0      | 0       |
| CHB | FAM75A1 | 39400667 | 0      | 0      | 0       |
| CHB | FAM75A1 | 39405667 | 0.0097 | 0.1694 | -0.949  |
| CHB | FAM75A1 | 39410667 | 0.0771 | 0.5082 | -1.3533 |
| CHB | FAM75A1 | 39415667 | 0.0674 | 0.3388 | -1.0887 |
| CHB | FAM75A1 | 39420667 | 0      | 0      | 0       |
| CHB | FAM75A1 | 39425667 | 0      | 0      | 0       |
| CHB | FAM75A1 | 39430667 | 0      | 0      | 0       |
| CHB | FAM75A1 | 39435667 | 0      | 0      | 0       |
| CHB | FAM75A1 | 39440667 | 0      | 0      | 0       |
| CHB | FAM75A1 | 39445667 | 0.0097 | 0.1694 | -0.949  |
| CHB | FAM75A1 | 39450667 | 0.0097 | 0.1694 | -0.949  |
| CHB | FAM75A1 | 39455667 | 0.102  | 0.1694 | -0.4005 |
| CHB | FAM75A1 | 39460667 | 0.1403 | 0.5082 | -1.1549 |
| CHB | FAM75A1 | 39465667 | 0.0383 | 0.3388 | -1.2054 |
| CHB | FAM75A1 | 39470667 | 0      | 0      | 0       |
| CHB | FAM75A1 | 39475667 | 0.0097 | 0.1694 | -0.949  |
| CHB | FAM75A1 | 39480667 | 0.1319 | 0.5082 | -1.1813 |
| CHB | FAM75A1 | 39485667 | 0.1416 | 0.6777 | -1.4015 |
| CHB | FAM75A1 | 39490667 | 0.0194 | 0.3388 | -1.2812 |
| CHB | FAM75A1 | 39495667 | 0      | 0      | 0       |
| CHB | FAM75A1 | 39500667 | 0      | 0      | 0       |
| CHB | FAM75A1 | 39505667 | 0      | 0      | 0       |
| CHB | FAM75A1 | 39510667 | 0      | 0      | 0       |
| CHB | FAM75A1 | 39515667 | 0      | 0      | 0       |
| CHB | FAM75A1 | 39520667 | 0      | 0      | 0       |
| CHB | FAM75A1 | 39525667 | 0      | 0      | 0       |
| CHB | FAM75A1 | 39530667 | 0      | 0      | 0       |
| CHB | FAM75A1 | 39535667 | 0      | 0      | 0       |
| CHB | FAM75A1 | 39540667 | 0      | 0      | 0       |
| CHB | FAM75A1 | 39545667 | 0      | 0      | 0       |
| CHB | FAM75A1 | 39550667 | 1.5612 | 1.1859 | 0.6699  |
| CHB | FAM75A1 | 39555667 | 3.4034 | 2.2024 | 1.3448  |
| CHB | FAM75A1 | 39560667 | 1.8519 | 1.1859 | 1.1888  |
| CHB | FAM75A1 | 39565667 | 0.3859 | 0.3388 | 0.1889  |
| CHB | FAM75A1 | 39570667 | 0.3954 | 0.3388 | 0.227   |
| CHB | FAM75A1 | 39575667 | 0.1437 | 0.8471 | -1.5862 |
| CHB | FAM75A1 | 39580667 | 0.5056 | 0.8471 | -0.7701 |
| CHB | FAM75A1 | 39585667 | 0.4005 | 0.6777 | -0.7247 |
| CHB | FAM75A1 | 39590667 | 0.5262 | 1.0165 | -0.9757 |
| CHB | FAM75A1 | 39595667 | 0.5165 | 0.6777 | -0.4214 |
| CHB | FAM75A1 | 39600667 | 0.0097 | 0.1694 | -0.949  |
| CHB | FAM75A1 | 39605667 | 0      | 0      | 0       |
| CHB | FAM75A1 | 39610667 | 0.4891 | 0.1694 | 1.8997  |
| CHB | FAM75A1 | 39615667 | 0.4891 | 0.1694 | 1.8997  |
| CHB | FAM75A1 | 39620667 | 0      | 0      | 0       |
| CHB | FAM75A1 | 39625667 | 0      | 0      | 0       |
| CHB | FAM75A1 | 39630667 | 0      | 0      | 0       |
| CHB | FAM75A1 | 39635667 | 0      | 0      | 0       |

## 2\_TajimasD\_data

|     |         |          |        |        |         |
|-----|---------|----------|--------|--------|---------|
| CHB | FAM75A1 | 39640667 | 0.0097 | 0.1694 | -0.949  |
| CHB | FAM75A1 | 39645667 | 0.0097 | 0.1694 | -0.949  |
| CHB | FAM75A1 | 39650667 | 0      | 0      | 0       |
| CHB | FAM75A1 | 39655667 | 0      | 0      | 0       |
| CHB | FAM75A1 | 39660667 | 0.0097 | 0.1694 | -0.949  |
| CHB | FAM75A1 | 39665667 | 0.0097 | 0.1694 | -0.949  |
| CHB | FAM75A1 | 39670667 | 0      | 0      | 0       |
| CHB | FAM75A1 | 39675667 | 0      | 0      | 0       |
| CHB | FAM75A1 | 39680667 | 0      | 0      | 0       |
| CHB | FAM75A1 | 39685667 | 0      | 0      | 0       |
| CHB | FAM75A1 | 39690667 | 0      | 0      | 0       |
| CHB | FAM75A1 | 39695667 | 0      | 0      | 0       |
| CHB | FAM75A1 | 39700667 | 0      | 0      | 0       |
| CHB | FAM75A1 | 39705667 | 0      | 0      | 0       |
| CHB | FAM75A1 | 39710667 | 0      | 0      | 0       |
| CHB | FAM75A1 | 39715667 | 0      | 0      | 0       |
| CHB | FAM75A1 | 39720667 | 0.0194 | 0.3388 | -1.2812 |
| CHB | FAM75A1 | 39725667 | 0.0194 | 0.3388 | -1.2812 |
| CHB | FAM75A1 | 39730667 | 0.665  | 0.8471 | -0.4106 |
| CHB | FAM75A1 | 39735667 | 0.6939 | 1.0165 | -0.642  |
| CHB | FAM75A1 | 39740667 | 0.4862 | 1.1859 | -1.249  |
| CHB | FAM75A1 | 39745667 | 0.5235 | 1.1859 | -1.1824 |
| CHB | FAM75A1 | 39750667 | 0.0662 | 0.1694 | -0.6132 |
| CHB | FAM75A1 | 39755667 | 0.0097 | 0.1694 | -0.949  |
| CHB | FAM75A1 | 39760667 | 0.0291 | 0.5082 | -1.504  |
| CHB | FAM75A1 | 39765667 | 0.0194 | 0.3388 | -1.2812 |
| CHB | FAM75A1 | 39770667 | 1.0282 | 1.3553 | -0.5301 |
| CHB | FAM75A1 | 39775667 | 3.9707 | 3.7271 | 0.177   |
| CHB | FAM75A1 | 39780667 | 3.5641 | 3.8965 | -0.2325 |
| CHB | FAM75A1 | 39785667 | 1.1196 | 2.5412 | -1.4196 |
| CHB | FAM75A1 | 39790667 | 0.7906 | 1.8636 | -1.369  |
| CHB | FAM75A1 | 39795667 | 0.5168 | 1.3553 | -1.359  |
| CHB | FAM75A1 | 39800667 | 0.7582 | 1.1859 | -0.7634 |
| CHB | FAM75A1 | 39805667 | 1.3225 | 2.3718 | -1.1076 |
| CHB | FAM75A1 | 39810667 | 0.8369 | 2.2024 | -1.529  |
| CHB | FAM75A1 | 39815667 | 1.2254 | 1.5247 | -0.4447 |
| CHB | FAM75A1 | 39820667 | 1.4832 | 1.3553 | 0.2073  |
| CHB | FAM75A1 | 39825667 | 0.5273 | 0.6777 | -0.3932 |
| CHB | FAM75A1 | 39830667 | 0.2212 | 0.3388 | -0.4717 |
| CHB | FAM75A1 | 39835667 | 0      | 0      | 0       |
| CHB | FAM75A1 | 39840667 | 0      | 0      | 0       |
| CHB | FAM75A1 | 39845667 | 0.0097 | 0.1694 | -0.949  |
| CHB | FAM75A1 | 39850667 | 0.0097 | 0.1694 | -0.949  |
| CHB | FAM75A1 | 39855667 | 0      | 0      | 0       |
| YRI | FAM75A1 | 38860667 | 0.8499 | 1.0084 | -0.316  |
| YRI | FAM75A1 | 38865667 | 0.9679 | 1.6806 | -0.9805 |
| YRI | FAM75A1 | 38870667 | 0.5503 | 1.5126 | -1.4329 |
| YRI | FAM75A1 | 38875667 | 2.5025 | 3.6974 | -0.8709 |
| YRI | FAM75A1 | 38880667 | 2.5828 | 3.6974 | -0.8124 |

## 2\_TajimasD\_data

|     |         |          |         |         |         |
|-----|---------|----------|---------|---------|---------|
| YRI | FAM75A1 | 38885667 | 1.2195  | 2.0167  | -0.9532 |
| YRI | FAM75A1 | 38890667 | 0.7068  | 1.1764  | -0.8399 |
| YRI | FAM75A1 | 38895667 | 0.3789  | 1.0084  | -1.255  |
| YRI | FAM75A1 | 38900667 | 0.5242  | 1.1764  | -1.1665 |
| YRI | FAM75A1 | 38905667 | 0.1638  | 0.3361  | -0.6917 |
| YRI | FAM75A1 | 38910667 | 1.4102  | 2.5209  | -1.1123 |
| YRI | FAM75A1 | 38915667 | 5.7443  | 8.9073  | -1.0535 |
| YRI | FAM75A1 | 38920667 | 7.2414  | 9.7476  | -0.7677 |
| YRI | FAM75A1 | 38925667 | 3.3109  | 4.5377  | -0.7496 |
| YRI | FAM75A1 | 38930667 | 2.2065  | 3.8654  | -1.1641 |
| YRI | FAM75A1 | 38935667 | 1.9689  | 3.3612  | -1.1    |
| YRI | FAM75A1 | 38940667 | 0.2031  | 1.1764  | -1.7408 |
| YRI | FAM75A1 | 38945667 | 0.6183  | 1.5126  | -1.3317 |
| YRI | FAM75A1 | 38950667 | 1.0629  | 2.689   | -1.5454 |
| YRI | FAM75A1 | 38955667 | 2.5123  | 4.2016  | -1.1035 |
| YRI | FAM75A1 | 38960667 | 3.5068  | 4.5377  | -0.6299 |
| YRI | FAM75A1 | 38965667 | 2.9316  | 3.1932  | -0.2157 |
| YRI | FAM75A1 | 38970667 | 1.6279  | 1.5126  | 0.1717  |
| YRI | FAM75A1 | 38975667 | 0.3313  | 0.8403  | -1.1497 |
| YRI | FAM75A1 | 38980667 | 0.1772  | 0.6722  | -1.2959 |
| YRI | FAM75A1 | 38985667 | 0.8437  | 1.1764  | -0.5951 |
| YRI | FAM75A1 | 38990667 | 5.545   | 3.8654  | 1.1787  |
| YRI | FAM75A1 | 38995667 | 9.3024  | 7.2267  | 0.8376  |
| YRI | FAM75A1 | 39000667 | 15.7488 | 12.1005 | 0.9127  |
| YRI | FAM75A1 | 39005667 | 27.4127 | 19.1591 | 1.3327  |
| YRI | FAM75A1 | 39010667 | 33.6685 | 23.0245 | 1.4394  |
| YRI | FAM75A1 | 39015667 | 30.7945 | 21.8481 | 1.2728  |
| YRI | FAM75A1 | 39020667 | 25.2885 | 21.0078 | 0.6325  |
| YRI | FAM75A1 | 39025667 | 17.9732 | 16.8062 | 0.2137  |
| YRI | FAM75A1 | 39030667 | 8.0726  | 9.0754  | -0.3283 |
| YRI | FAM75A1 | 39035667 | 6.2024  | 9.9157  | -1.1196 |
| YRI | FAM75A1 | 39040667 | 7.9095  | 15.1256 | -1.4612 |
| YRI | FAM75A1 | 39045667 | 8.7557  | 15.9659 | -1.3866 |
| YRI | FAM75A1 | 39050667 | 12.5434 | 14.9575 | -0.4941 |
| YRI | FAM75A1 | 39055667 | 18.4181 | 16.4701 | 0.3637  |
| YRI | FAM75A1 | 39060667 | 13.5778 | 13.613  | -0.0079 |
| YRI | FAM75A1 | 39065667 | 3.1793  | 4.7057  | -0.9036 |
| YRI | FAM75A1 | 39070667 | 6.7154  | 6.0502  | 0.3152  |
| YRI | FAM75A1 | 39075667 | 14.1036 | 13.2769 | 0.1895  |
| YRI | FAM75A1 | 39080667 | 20.2779 | 18.3188 | 0.3303  |
| YRI | FAM75A1 | 39085667 | 23.2816 | 22.8565 | 0.0579  |
| YRI | FAM75A1 | 39090667 | 22.4506 | 22.5203 | -0.0096 |
| YRI | FAM75A1 | 39095667 | 23.9271 | 19.4952 | 0.7038  |
| YRI | FAM75A1 | 39100667 | 19.2576 | 19.4952 | -0.0377 |
| YRI | FAM75A1 | 39105667 | 10.6996 | 18.823  | -1.3342 |
| YRI | FAM75A1 | 39110667 | 11.0274 | 20.5036 | -1.4334 |
| YRI | FAM75A1 | 39115667 | 13.0799 | 22.5203 | -1.3043 |
| YRI | FAM75A1 | 39120667 | 9.7063  | 19.9994 | -1.5948 |
| YRI | FAM75A1 | 39125667 | 8.0856  | 17.4785 | -1.6565 |

## 2\_TajimasD\_data

|     |         |          |         |         |         |
|-----|---------|----------|---------|---------|---------|
| YRI | FAM75A1 | 39130667 | 9.0354  | 15.4617 | -1.2743 |
| YRI | FAM75A1 | 39135667 | 10.6386 | 16.302  | -1.0677 |
| YRI | FAM75A1 | 39140667 | 9.2404  | 16.9743 | -1.4027 |
| YRI | FAM75A1 | 39145667 | 9.4959  | 19.1591 | -1.5603 |
| YRI | FAM75A1 | 39150667 | 11.9036 | 19.6633 | -1.222  |
| YRI | FAM75A1 | 39155667 | 11.6757 | 17.4785 | -1.0234 |
| YRI | FAM75A1 | 39160667 | 11.4624 | 17.1423 | -1.0205 |
| YRI | FAM75A1 | 39165667 | 8.5787  | 15.9659 | -1.4206 |
| YRI | FAM75A1 | 39170667 | 7.5405  | 17.6465 | -1.766  |
| YRI | FAM75A1 | 39175667 | 7.7715  | 17.4785 | -1.7119 |
| YRI | FAM75A1 | 39180667 | 6.4296  | 13.613  | -1.6078 |
| YRI | FAM75A1 | 39185667 | 3.1814  | 6.0502  | -1.3593 |
| YRI | FAM75A1 | 39190667 | 0.0185  | 0.3361  | -1.275  |
| YRI | FAM75A1 | 39195667 | 0.0185  | 0.3361  | -1.275  |
| YRI | FAM75A1 | 39200667 | 0.9887  | 1.5126  | -0.7801 |
| YRI | FAM75A1 | 39205667 | 1.1432  | 1.8487  | -0.9024 |
| YRI | FAM75A1 | 39210667 | 0.2187  | 0.6722  | -1.1872 |
| YRI | FAM75A1 | 39215667 | 0.0641  | 0.3361  | -1.092  |
| YRI | FAM75A1 | 39220667 | 0.0185  | 0.1681  | -0.8893 |
| YRI | FAM75A1 | 39225667 | 0.5102  | 0.5042  | 0.0189  |
| YRI | FAM75A1 | 39230667 | 0.8378  | 0.5042  | 1.0484  |
| YRI | FAM75A1 | 39235667 | 0.3461  | 0.1681  | 1.0582  |
| YRI | FAM75A1 | 39240667 | 0.7134  | 0.6722  | 0.1079  |
| YRI | FAM75A1 | 39245667 | 1.3911  | 1.1764  | 0.384   |
| YRI | FAM75A1 | 39250667 | 1.0918  | 1.1764  | -0.1513 |
| YRI | FAM75A1 | 39255667 | 1.5869  | 1.8487  | -0.3349 |
| YRI | FAM75A1 | 39260667 | 1.1727  | 1.1764  | -0.0066 |
| YRI | FAM75A1 | 39265667 | 0.1003  | 0.6722  | -1.4972 |
| YRI | FAM75A1 | 39270667 | 0.7529  | 1.6806  | -1.2762 |
| YRI | FAM75A1 | 39275667 | 1.2128  | 1.5126  | -0.4464 |
| YRI | FAM75A1 | 39280667 | 0.5601  | 0.5042  | 0.1757  |
| YRI | FAM75A1 | 39285667 | 1.6255  | 1.3445  | 0.4564  |
| YRI | FAM75A1 | 39290667 | 1.7067  | 1.6806  | 0.0359  |
| YRI | FAM75A1 | 39295667 | 0.7217  | 2.0167  | -1.5484 |
| YRI | FAM75A1 | 39300667 | 0.6588  | 1.8487  | -1.522  |
| YRI | FAM75A1 | 39305667 | 0.0183  | 0.1681  | -0.8905 |
| YRI | FAM75A1 | 39310667 | 0       | 0       | 0       |
| YRI | FAM75A1 | 39315667 | 0       | 0       | 0       |
| YRI | FAM75A1 | 39320667 | 0       | 0       | 0       |
| YRI | FAM75A1 | 39325667 | 0       | 0       | 0       |
| YRI | FAM75A1 | 39330667 | 0       | 0       | 0       |
| YRI | FAM75A1 | 39335667 | 0       | 0       | 0       |
| YRI | FAM75A1 | 39340667 | 0       | 0       | 0       |
| YRI | FAM75A1 | 39345667 | 0       | 0       | 0       |
| YRI | FAM75A1 | 39350667 | 1.2085  | 1.0084  | 0.3989  |
| YRI | FAM75A1 | 39355667 | 1.8867  | 1.8487  | 0.0486  |
| YRI | FAM75A1 | 39360667 | 0.7058  | 1.1764  | -0.8417 |
| YRI | FAM75A1 | 39365667 | 0.1071  | 0.5042  | -1.248  |
| YRI | FAM75A1 | 39370667 | 0.3718  | 0.8403  | -1.0582 |

## 2\_TajimasD\_data

|     |         |          |        |        |         |
|-----|---------|----------|--------|--------|---------|
| YRI | FAM75A1 | 39375667 | 0.4776 | 1.0084 | -1.0582 |
| YRI | FAM75A1 | 39380667 | 0.231  | 0.5042 | -0.8586 |
| YRI | FAM75A1 | 39385667 | 0.1351 | 0.5042 | -1.16   |
| YRI | FAM75A1 | 39390667 | 0.0895 | 0.3361 | -0.99   |
| YRI | FAM75A1 | 39395667 | 0      | 0      | 0       |
| YRI | FAM75A1 | 39400667 | 0      | 0      | 0       |
| YRI | FAM75A1 | 39405667 | 0      | 0      | 0       |
| YRI | FAM75A1 | 39410667 | 0.3253 | 0.6722 | -0.9082 |
| YRI | FAM75A1 | 39415667 | 0.3253 | 0.6722 | -0.9082 |
| YRI | FAM75A1 | 39420667 | 0      | 0      | 0       |
| YRI | FAM75A1 | 39425667 | 0      | 0      | 0       |
| YRI | FAM75A1 | 39430667 | 0      | 0      | 0       |
| YRI | FAM75A1 | 39435667 | 0      | 0      | 0       |
| YRI | FAM75A1 | 39440667 | 0      | 0      | 0       |
| YRI | FAM75A1 | 39445667 | 0.0638 | 0.3361 | -1.0932 |
| YRI | FAM75A1 | 39450667 | 0.073  | 0.5042 | -1.3551 |
| YRI | FAM75A1 | 39455667 | 0.0895 | 0.3361 | -0.99   |
| YRI | FAM75A1 | 39460667 | 0.163  | 1.0084 | -1.6855 |
| YRI | FAM75A1 | 39465667 | 0.2536 | 1.1764 | -1.6505 |
| YRI | FAM75A1 | 39470667 | 0.1708 | 0.3361 | -0.6636 |
| YRI | FAM75A1 | 39475667 | 0.1083 | 0.6722 | -1.4762 |
| YRI | FAM75A1 | 39480667 | 0.1452 | 1.1764 | -1.8444 |
| YRI | FAM75A1 | 39485667 | 0.2419 | 1.0084 | -1.5282 |
| YRI | FAM75A1 | 39490667 | 0.205  | 0.5042 | -0.9403 |
| YRI | FAM75A1 | 39495667 | 0      | 0      | 0       |
| YRI | FAM75A1 | 39500667 | 0      | 0      | 0       |
| YRI | FAM75A1 | 39505667 | 0      | 0      | 0       |
| YRI | FAM75A1 | 39510667 | 0      | 0      | 0       |
| YRI | FAM75A1 | 39515667 | 0      | 0      | 0       |
| YRI | FAM75A1 | 39520667 | 0      | 0      | 0       |
| YRI | FAM75A1 | 39525667 | 0      | 0      | 0       |
| YRI | FAM75A1 | 39530667 | 0      | 0      | 0       |
| YRI | FAM75A1 | 39535667 | 0      | 0      | 0       |
| YRI | FAM75A1 | 39540667 | 0      | 0      | 0       |
| YRI | FAM75A1 | 39545667 | 0      | 0      | 0       |
| YRI | FAM75A1 | 39550667 | 2.5017 | 1.8487 | 0.8352  |
| YRI | FAM75A1 | 39555667 | 4.1909 | 3.6974 | 0.3597  |
| YRI | FAM75A1 | 39560667 | 1.7612 | 2.0167 | -0.3055 |
| YRI | FAM75A1 | 39565667 | 0.2183 | 0.3361 | -0.4729 |
| YRI | FAM75A1 | 39570667 | 0.1739 | 0.3361 | -0.6512 |
| YRI | FAM75A1 | 39575667 | 1.1476 | 1.0084 | 0.2775  |
| YRI | FAM75A1 | 39580667 | 1.3114 | 1.1764 | 0.2415  |
| YRI | FAM75A1 | 39585667 | 0.4752 | 1.0084 | -1.063  |
| YRI | FAM75A1 | 39590667 | 0.857  | 1.3445 | -0.7918 |
| YRI | FAM75A1 | 39595667 | 0.5918 | 0.8403 | -0.5613 |
| YRI | FAM75A1 | 39600667 | 0.0185 | 0.1681 | -0.8893 |
| YRI | FAM75A1 | 39605667 | 0.0093 | 0.1681 | -0.944  |
| YRI | FAM75A1 | 39610667 | 0.237  | 0.3361 | -0.3978 |
| YRI | FAM75A1 | 39615667 | 0.2278 | 0.1681 | 0.3549  |

## 2\_TajimasD\_data

|     |         |          |        |        |         |
|-----|---------|----------|--------|--------|---------|
| YRI | FAM75A1 | 39620667 | 0.1258 | 0.5042 | -1.1892 |
| YRI | FAM75A1 | 39625667 | 0.1258 | 0.5042 | -1.1892 |
| YRI | FAM75A1 | 39630667 | 0.0093 | 0.1681 | -0.944  |
| YRI | FAM75A1 | 39635667 | 0.037  | 0.6722 | -1.6629 |
| YRI | FAM75A1 | 39640667 | 0.0554 | 0.6722 | -1.6147 |
| YRI | FAM75A1 | 39645667 | 0.0276 | 0.1681 | -0.8352 |
| YRI | FAM75A1 | 39650667 | 0      | 0      | 0       |
| YRI | FAM75A1 | 39655667 | 0      | 0      | 0       |
| YRI | FAM75A1 | 39660667 | 0.2541 | 0.1681 | 0.5112  |
| YRI | FAM75A1 | 39665667 | 0.2541 | 0.1681 | 0.5112  |
| YRI | FAM75A1 | 39670667 | 0      | 0      | 0       |
| YRI | FAM75A1 | 39675667 | 0      | 0      | 0       |
| YRI | FAM75A1 | 39680667 | 0      | 0      | 0       |
| YRI | FAM75A1 | 39685667 | 0      | 0      | 0       |
| YRI | FAM75A1 | 39690667 | 0      | 0      | 0       |
| YRI | FAM75A1 | 39695667 | 0      | 0      | 0       |
| YRI | FAM75A1 | 39700667 | 0      | 0      | 0       |
| YRI | FAM75A1 | 39705667 | 0      | 0      | 0       |
| YRI | FAM75A1 | 39710667 | 0      | 0      | 0       |
| YRI | FAM75A1 | 39715667 | 0.1616 | 0.1681 | -0.0386 |
| YRI | FAM75A1 | 39720667 | 0.1616 | 0.1681 | -0.0386 |
| YRI | FAM75A1 | 39725667 | 0      | 0      | 0       |
| YRI | FAM75A1 | 39730667 | 0.3205 | 1.5126 | -1.7751 |
| YRI | FAM75A1 | 39735667 | 0.4121 | 2.0167 | -1.9185 |
| YRI | FAM75A1 | 39740667 | 0.8923 | 2.5209 | -1.631  |
| YRI | FAM75A1 | 39745667 | 1.609  | 4.0335 | -1.6404 |
| YRI | FAM75A1 | 39750667 | 1.123  | 2.1848 | -1.1922 |
| YRI | FAM75A1 | 39755667 | 0.3332 | 0.5042 | -0.5374 |
| YRI | FAM75A1 | 39760667 | 0.3647 | 1.0084 | -1.2833 |
| YRI | FAM75A1 | 39765667 | 0.411  | 1.6806 | -1.7466 |
| YRI | FAM75A1 | 39770667 | 1.0999 | 2.689  | -1.5102 |
| YRI | FAM75A1 | 39775667 | 4.6388 | 5.7141 | -0.5362 |
| YRI | FAM75A1 | 39780667 | 5.1645 | 6.3864 | -0.5515 |
| YRI | FAM75A1 | 39785667 | 2.6113 | 4.0335 | -0.9623 |
| YRI | FAM75A1 | 39790667 | 1.3153 | 2.3529 | -1.0983 |
| YRI | FAM75A1 | 39795667 | 0.7971 | 1.3445 | -0.8891 |
| YRI | FAM75A1 | 39800667 | 0.932  | 1.6806 | -1.0299 |
| YRI | FAM75A1 | 39805667 | 1.0721 | 2.0167 | -1.1294 |
| YRI | FAM75A1 | 39810667 | 0.7181 | 1.3445 | -1.0174 |
| YRI | FAM75A1 | 39815667 | 1.1289 | 2.3529 | -1.2957 |
| YRI | FAM75A1 | 39820667 | 1.233  | 2.3529 | -1.1855 |
| YRI | FAM75A1 | 39825667 | 0.3616 | 1.0084 | -1.2895 |
| YRI | FAM75A1 | 39830667 | 0.4172 | 0.8403 | -0.9556 |
| YRI | FAM75A1 | 39835667 | 0.2148 | 0.3361 | -0.487  |
| YRI | FAM75A1 | 39840667 | 0.0093 | 0.1681 | -0.944  |
| YRI | FAM75A1 | 39845667 | 0      | 0      | 0       |
| YRI | FAM75A1 | 39850667 | 0      | 0      | 0       |
| YRI | FAM75A1 | 39855667 | 0      | 0      | 0       |
| CEU | FAM75A5 | 60419372 | 0      | 0      | 0       |



## 2\_TajimasD\_data

|     |         |          |   |   |   |
|-----|---------|----------|---|---|---|
| CEU | FAM75A5 | 60424372 | 0 | 0 | 0 |
| CEU | FAM75A5 | 60429372 | 0 | 0 | 0 |
| CEU | FAM75A5 | 60434372 | 0 | 0 | 0 |
| CEU | FAM75A5 | 60439372 | 0 | 0 | 0 |
| CEU | FAM75A5 | 60444372 | 0 | 0 | 0 |
| CEU | FAM75A5 | 60449372 | 0 | 0 | 0 |
| CEU | FAM75A5 | 60454372 | 0 | 0 | 0 |
| CEU | FAM75A5 | 60459372 | 0 | 0 | 0 |
| CEU | FAM75A5 | 60464372 | 0 | 0 | 0 |
| CEU | FAM75A5 | 60469372 | 0 | 0 | 0 |
| CEU | FAM75A5 | 60474372 | 0 | 0 | 0 |
| CEU | FAM75A5 | 60479372 | 0 | 0 | 0 |
| CEU | FAM75A5 | 60484372 | 0 | 0 | 0 |
| CEU | FAM75A5 | 60489372 | 0 | 0 | 0 |
| CEU | FAM75A5 | 60494372 | 0 | 0 | 0 |
| CEU | FAM75A5 | 60499372 | 0 | 0 | 0 |
| CEU | FAM75A5 | 60504372 | 0 | 0 | 0 |
| CEU | FAM75A5 | 60509372 | 0 | 0 | 0 |
| CEU | FAM75A5 | 60514372 | 0 | 0 | 0 |
| CEU | FAM75A5 | 60519372 | 0 | 0 | 0 |
| CEU | FAM75A5 | 60524372 | 0 | 0 | 0 |
| CEU | FAM75A5 | 60529372 | 0 | 0 | 0 |
| CEU | FAM75A5 | 60534372 | 0 | 0 | 0 |
| CEU | FAM75A5 | 60539372 | 0 | 0 | 0 |
| CEU | FAM75A5 | 60544372 | 0 | 0 | 0 |
| CEU | FAM75A5 | 60549372 | 0 | 0 | 0 |
| CEU | FAM75A5 | 60554372 | 0 | 0 | 0 |
| CEU | FAM75A5 | 60559372 | 0 | 0 | 0 |
| CEU | FAM75A5 | 60564372 | 0 | 0 | 0 |
| CEU | FAM75A5 | 60569372 | 0 | 0 | 0 |
| CEU | FAM75A5 | 60574372 | 0 | 0 | 0 |
| CEU | FAM75A5 | 60579372 | 0 | 0 | 0 |
| CEU | FAM75A5 | 60584372 | 0 | 0 | 0 |
| CEU | FAM75A5 | 60589372 | 0 | 0 | 0 |
| CEU | FAM75A5 | 60594372 | 0 | 0 | 0 |
| CEU | FAM75A5 | 60599372 | 0 | 0 | 0 |
| CEU | FAM75A5 | 60604372 | 0 | 0 | 0 |
| CEU | FAM75A5 | 60609372 | 0 | 0 | 0 |
| CEU | FAM75A5 | 60614372 | 0 | 0 | 0 |
| CEU | FAM75A5 | 60619372 | 0 | 0 | 0 |
| CEU | FAM75A5 | 60624372 | 0 | 0 | 0 |
| CEU | FAM75A5 | 60629372 | 0 | 0 | 0 |
| CEU | FAM75A5 | 60634372 | 0 | 0 | 0 |
| CEU | FAM75A5 | 60639372 | 0 | 0 | 0 |
| CEU | FAM75A5 | 60644372 | 0 | 0 | 0 |
| CEU | FAM75A5 | 60649372 | 0 | 0 | 0 |
| CEU | FAM75A5 | 60654372 | 0 | 0 | 0 |
| CEU | FAM75A5 | 60659372 | 0 | 0 | 0 |
| CEU | FAM75A5 | 60664372 | 0 | 0 | 0 |

## 2\_TajimasD\_data

|     |         |          |   |   |   |
|-----|---------|----------|---|---|---|
| CEU | FAM75A5 | 60669372 | 0 | 0 | 0 |
| CEU | FAM75A5 | 60674372 | 0 | 0 | 0 |
| CEU | FAM75A5 | 60679372 | 0 | 0 | 0 |
| CEU | FAM75A5 | 60684372 | 0 | 0 | 0 |
| CEU | FAM75A5 | 60689372 | 0 | 0 | 0 |
| CEU | FAM75A5 | 60694372 | 0 | 0 | 0 |
| CEU | FAM75A5 | 60699372 | 0 | 0 | 0 |
| CEU | FAM75A5 | 60704372 | 0 | 0 | 0 |
| CEU | FAM75A5 | 60709372 | 0 | 0 | 0 |
| CEU | FAM75A5 | 60714372 | 0 | 0 | 0 |
| CEU | FAM75A5 | 60719372 | 0 | 0 | 0 |
| CEU | FAM75A5 | 60724372 | 0 | 0 | 0 |
| CEU | FAM75A5 | 60729372 | 0 | 0 | 0 |
| CEU | FAM75A5 | 60734372 | 0 | 0 | 0 |
| CEU | FAM75A5 | 60739372 | 0 | 0 | 0 |
| CEU | FAM75A5 | 60744372 | 0 | 0 | 0 |
| CEU | FAM75A5 | 60749372 | 0 | 0 | 0 |
| CEU | FAM75A5 | 60754372 | 0 | 0 | 0 |
| CEU | FAM75A5 | 60759372 | 0 | 0 | 0 |
| CEU | FAM75A5 | 60764372 | 0 | 0 | 0 |
| CEU | FAM75A5 | 60769372 | 0 | 0 | 0 |
| CEU | FAM75A5 | 60774372 | 0 | 0 | 0 |
| CEU | FAM75A5 | 60779372 | 0 | 0 | 0 |
| CEU | FAM75A5 | 60784372 | 0 | 0 | 0 |
| CEU | FAM75A5 | 60789372 | 0 | 0 | 0 |
| CEU | FAM75A5 | 60794372 | 0 | 0 | 0 |
| CEU | FAM75A5 | 60799372 | 0 | 0 | 0 |
| CEU | FAM75A5 | 60804372 | 0 | 0 | 0 |
| CEU | FAM75A5 | 60809372 | 0 | 0 | 0 |
| CEU | FAM75A5 | 60814372 | 0 | 0 | 0 |
| CEU | FAM75A5 | 60819372 | 0 | 0 | 0 |
| CEU | FAM75A5 | 60824372 | 0 | 0 | 0 |
| CEU | FAM75A5 | 60829372 | 0 | 0 | 0 |
| CEU | FAM75A5 | 60834372 | 0 | 0 | 0 |
| CEU | FAM75A5 | 60839372 | 0 | 0 | 0 |
| CEU | FAM75A5 | 60844372 | 0 | 0 | 0 |
| CEU | FAM75A5 | 60849372 | 0 | 0 | 0 |
| CEU | FAM75A5 | 60854372 | 0 | 0 | 0 |
| CEU | FAM75A5 | 60859372 | 0 | 0 | 0 |
| CEU | FAM75A5 | 60864372 | 0 | 0 | 0 |
| CEU | FAM75A5 | 60869372 | 0 | 0 | 0 |
| CEU | FAM75A5 | 60874372 | 0 | 0 | 0 |
| CEU | FAM75A5 | 60879372 | 0 | 0 | 0 |
| CEU | FAM75A5 | 60884372 | 0 | 0 | 0 |
| CEU | FAM75A5 | 60889372 | 0 | 0 | 0 |
| CEU | FAM75A5 | 60894372 | 0 | 0 | 0 |
| CEU | FAM75A5 | 60899372 | 0 | 0 | 0 |
| CEU | FAM75A5 | 60904372 | 0 | 0 | 0 |
| CEU | FAM75A5 | 60909372 | 0 | 0 | 0 |

## 2\_TajimasD\_data

|     |         |          |   |   |   |
|-----|---------|----------|---|---|---|
| CEU | FAM75A5 | 60914372 | 0 | 0 | 0 |
| CEU | FAM75A5 | 60919372 | 0 | 0 | 0 |
| CEU | FAM75A5 | 60924372 | 0 | 0 | 0 |
| CEU | FAM75A5 | 60929372 | 0 | 0 | 0 |
| CEU | FAM75A5 | 60934372 | 0 | 0 | 0 |
| CEU | FAM75A5 | 60939372 | 0 | 0 | 0 |
| CEU | FAM75A5 | 60944372 | 0 | 0 | 0 |
| CEU | FAM75A5 | 60949372 | 0 | 0 | 0 |
| CEU | FAM75A5 | 60954372 | 0 | 0 | 0 |
| CEU | FAM75A5 | 60959372 | 0 | 0 | 0 |
| CEU | FAM75A5 | 60964372 | 0 | 0 | 0 |
| CEU | FAM75A5 | 60969372 | 0 | 0 | 0 |
| CEU | FAM75A5 | 60974372 | 0 | 0 | 0 |
| CEU | FAM75A5 | 60979372 | 0 | 0 | 0 |
| CEU | FAM75A5 | 60984372 | 0 | 0 | 0 |
| CEU | FAM75A5 | 60989372 | 0 | 0 | 0 |
| CEU | FAM75A5 | 60994372 | 0 | 0 | 0 |
| CEU | FAM75A5 | 60999372 | 0 | 0 | 0 |
| CEU | FAM75A5 | 61004372 | 0 | 0 | 0 |
| CEU | FAM75A5 | 61009372 | 0 | 0 | 0 |
| CEU | FAM75A5 | 61014372 | 0 | 0 | 0 |
| CEU | FAM75A5 | 61019372 | 0 | 0 | 0 |
| CEU | FAM75A5 | 61024372 | 0 | 0 | 0 |
| CEU | FAM75A5 | 61029372 | 0 | 0 | 0 |
| CEU | FAM75A5 | 61034372 | 0 | 0 | 0 |
| CEU | FAM75A5 | 61039372 | 0 | 0 | 0 |
| CEU | FAM75A5 | 61044372 | 0 | 0 | 0 |
| CEU | FAM75A5 | 61049372 | 0 | 0 | 0 |
| CEU | FAM75A5 | 61054372 | 0 | 0 | 0 |
| CEU | FAM75A5 | 61059372 | 0 | 0 | 0 |
| CEU | FAM75A5 | 61064372 | 0 | 0 | 0 |
| CEU | FAM75A5 | 61069372 | 0 | 0 | 0 |
| CEU | FAM75A5 | 61074372 | 0 | 0 | 0 |
| CEU | FAM75A5 | 61079372 | 0 | 0 | 0 |
| CEU | FAM75A5 | 61084372 | 0 | 0 | 0 |
| CEU | FAM75A5 | 61089372 | 0 | 0 | 0 |
| CEU | FAM75A5 | 61094372 | 0 | 0 | 0 |
| CEU | FAM75A5 | 61099372 | 0 | 0 | 0 |
| CEU | FAM75A5 | 61104372 | 0 | 0 | 0 |
| CEU | FAM75A5 | 61109372 | 0 | 0 | 0 |
| CEU | FAM75A5 | 61114372 | 0 | 0 | 0 |
| CEU | FAM75A5 | 61119372 | 0 | 0 | 0 |
| CEU | FAM75A5 | 61124372 | 0 | 0 | 0 |
| CEU | FAM75A5 | 61129372 | 0 | 0 | 0 |
| CEU | FAM75A5 | 61134372 | 0 | 0 | 0 |
| CEU | FAM75A5 | 61139372 | 0 | 0 | 0 |
| CEU | FAM75A5 | 61144372 | 0 | 0 | 0 |
| CEU | FAM75A5 | 61149372 | 0 | 0 | 0 |
| CEU | FAM75A5 | 61154372 | 0 | 0 | 0 |

## 2\_TajimasD\_data

|     |         |          |   |   |   |
|-----|---------|----------|---|---|---|
| CEU | FAM75A5 | 61159372 | 0 | 0 | 0 |
| CEU | FAM75A5 | 61164372 | 0 | 0 | 0 |
| CEU | FAM75A5 | 61169372 | 0 | 0 | 0 |
| CEU | FAM75A5 | 61174372 | 0 | 0 | 0 |
| CEU | FAM75A5 | 61179372 | 0 | 0 | 0 |
| CEU | FAM75A5 | 61184372 | 0 | 0 | 0 |
| CEU | FAM75A5 | 61189372 | 0 | 0 | 0 |
| CEU | FAM75A5 | 61194372 | 0 | 0 | 0 |
| CEU | FAM75A5 | 61199372 | 0 | 0 | 0 |
| CEU | FAM75A5 | 61204372 | 0 | 0 | 0 |
| CEU | FAM75A5 | 61209372 | 0 | 0 | 0 |
| CEU | FAM75A5 | 61214372 | 0 | 0 | 0 |
| CEU | FAM75A5 | 61219372 | 0 | 0 | 0 |
| CEU | FAM75A5 | 61224372 | 0 | 0 | 0 |
| CEU | FAM75A5 | 61229372 | 0 | 0 | 0 |
| CEU | FAM75A5 | 61234372 | 0 | 0 | 0 |
| CEU | FAM75A5 | 61239372 | 0 | 0 | 0 |
| CEU | FAM75A5 | 61244372 | 0 | 0 | 0 |
| CEU | FAM75A5 | 61249372 | 0 | 0 | 0 |
| CEU | FAM75A5 | 61254372 | 0 | 0 | 0 |
| CEU | FAM75A5 | 61259372 | 0 | 0 | 0 |
| CEU | FAM75A5 | 61264372 | 0 | 0 | 0 |
| CEU | FAM75A5 | 61269372 | 0 | 0 | 0 |
| CEU | FAM75A5 | 61274372 | 0 | 0 | 0 |
| CEU | FAM75A5 | 61279372 | 0 | 0 | 0 |
| CEU | FAM75A5 | 61284372 | 0 | 0 | 0 |
| CEU | FAM75A5 | 61289372 | 0 | 0 | 0 |
| CEU | FAM75A5 | 61294372 | 0 | 0 | 0 |
| CEU | FAM75A5 | 61299372 | 0 | 0 | 0 |
| CEU | FAM75A5 | 61304372 | 0 | 0 | 0 |
| CEU | FAM75A5 | 61309372 | 0 | 0 | 0 |
| CEU | FAM75A5 | 61314372 | 0 | 0 | 0 |
| CEU | FAM75A5 | 61319372 | 0 | 0 | 0 |
| CEU | FAM75A5 | 61324372 | 0 | 0 | 0 |
| CEU | FAM75A5 | 61329372 | 0 | 0 | 0 |
| CEU | FAM75A5 | 61334372 | 0 | 0 | 0 |
| CEU | FAM75A5 | 61339372 | 0 | 0 | 0 |
| CEU | FAM75A5 | 61344372 | 0 | 0 | 0 |
| CEU | FAM75A5 | 61349372 | 0 | 0 | 0 |
| CEU | FAM75A5 | 61354372 | 0 | 0 | 0 |
| CEU | FAM75A5 | 61359372 | 0 | 0 | 0 |
| CEU | FAM75A5 | 61364372 | 0 | 0 | 0 |
| CEU | FAM75A5 | 61369372 | 0 | 0 | 0 |
| CEU | FAM75A5 | 61374372 | 0 | 0 | 0 |
| CEU | FAM75A5 | 61379372 | 0 | 0 | 0 |
| CEU | FAM75A5 | 61384372 | 0 | 0 | 0 |
| CEU | FAM75A5 | 61389372 | 0 | 0 | 0 |
| CEU | FAM75A5 | 61394372 | 0 | 0 | 0 |
| CEU | FAM75A5 | 61399372 | 0 | 0 | 0 |

## 2\_TajimasD\_data

|     |         |          |   |   |   |
|-----|---------|----------|---|---|---|
| CEU | FAM75A5 | 61404372 | 0 | 0 | 0 |
| CEU | FAM75A5 | 61409372 | 0 | 0 | 0 |
| CEU | FAM75A5 | 61414372 | 0 | 0 | 0 |
| CHB | FAM75A5 | 60419372 | 0 | 0 | 0 |
| CHB | FAM75A5 | 60424372 | 0 | 0 | 0 |
| CHB | FAM75A5 | 60429372 | 0 | 0 | 0 |
| CHB | FAM75A5 | 60434372 | 0 | 0 | 0 |
| CHB | FAM75A5 | 60439372 | 0 | 0 | 0 |
| CHB | FAM75A5 | 60444372 | 0 | 0 | 0 |
| CHB | FAM75A5 | 60449372 | 0 | 0 | 0 |
| CHB | FAM75A5 | 60454372 | 0 | 0 | 0 |
| CHB | FAM75A5 | 60459372 | 0 | 0 | 0 |
| CHB | FAM75A5 | 60464372 | 0 | 0 | 0 |
| CHB | FAM75A5 | 60469372 | 0 | 0 | 0 |
| CHB | FAM75A5 | 60474372 | 0 | 0 | 0 |
| CHB | FAM75A5 | 60479372 | 0 | 0 | 0 |
| CHB | FAM75A5 | 60484372 | 0 | 0 | 0 |
| CHB | FAM75A5 | 60489372 | 0 | 0 | 0 |
| CHB | FAM75A5 | 60494372 | 0 | 0 | 0 |
| CHB | FAM75A5 | 60499372 | 0 | 0 | 0 |
| CHB | FAM75A5 | 60504372 | 0 | 0 | 0 |
| CHB | FAM75A5 | 60509372 | 0 | 0 | 0 |
| CHB | FAM75A5 | 60514372 | 0 | 0 | 0 |
| CHB | FAM75A5 | 60519372 | 0 | 0 | 0 |
| CHB | FAM75A5 | 60524372 | 0 | 0 | 0 |
| CHB | FAM75A5 | 60529372 | 0 | 0 | 0 |
| CHB | FAM75A5 | 60534372 | 0 | 0 | 0 |
| CHB | FAM75A5 | 60539372 | 0 | 0 | 0 |
| CHB | FAM75A5 | 60544372 | 0 | 0 | 0 |
| CHB | FAM75A5 | 60549372 | 0 | 0 | 0 |
| CHB | FAM75A5 | 60554372 | 0 | 0 | 0 |
| CHB | FAM75A5 | 60559372 | 0 | 0 | 0 |
| CHB | FAM75A5 | 60564372 | 0 | 0 | 0 |
| CHB | FAM75A5 | 60569372 | 0 | 0 | 0 |
| CHB | FAM75A5 | 60574372 | 0 | 0 | 0 |
| CHB | FAM75A5 | 60579372 | 0 | 0 | 0 |
| CHB | FAM75A5 | 60584372 | 0 | 0 | 0 |
| CHB | FAM75A5 | 60589372 | 0 | 0 | 0 |
| CHB | FAM75A5 | 60594372 | 0 | 0 | 0 |
| CHB | FAM75A5 | 60599372 | 0 | 0 | 0 |
| CHB | FAM75A5 | 60604372 | 0 | 0 | 0 |
| CHB | FAM75A5 | 60609372 | 0 | 0 | 0 |
| CHB | FAM75A5 | 60614372 | 0 | 0 | 0 |
| CHB | FAM75A5 | 60619372 | 0 | 0 | 0 |
| CHB | FAM75A5 | 60624372 | 0 | 0 | 0 |
| CHB | FAM75A5 | 60629372 | 0 | 0 | 0 |
| CHB | FAM75A5 | 60634372 | 0 | 0 | 0 |
| CHB | FAM75A5 | 60639372 | 0 | 0 | 0 |
| CHB | FAM75A5 | 60644372 | 0 | 0 | 0 |

## 2\_TajimasD\_data

|     |         |          |   |   |   |
|-----|---------|----------|---|---|---|
| CHB | FAM75A5 | 60649372 | 0 | 0 | 0 |
| CHB | FAM75A5 | 60654372 | 0 | 0 | 0 |
| CHB | FAM75A5 | 60659372 | 0 | 0 | 0 |
| CHB | FAM75A5 | 60664372 | 0 | 0 | 0 |
| CHB | FAM75A5 | 60669372 | 0 | 0 | 0 |
| CHB | FAM75A5 | 60674372 | 0 | 0 | 0 |
| CHB | FAM75A5 | 60679372 | 0 | 0 | 0 |
| CHB | FAM75A5 | 60684372 | 0 | 0 | 0 |
| CHB | FAM75A5 | 60689372 | 0 | 0 | 0 |
| CHB | FAM75A5 | 60694372 | 0 | 0 | 0 |
| CHB | FAM75A5 | 60699372 | 0 | 0 | 0 |
| CHB | FAM75A5 | 60704372 | 0 | 0 | 0 |
| CHB | FAM75A5 | 60709372 | 0 | 0 | 0 |
| CHB | FAM75A5 | 60714372 | 0 | 0 | 0 |
| CHB | FAM75A5 | 60719372 | 0 | 0 | 0 |
| CHB | FAM75A5 | 60724372 | 0 | 0 | 0 |
| CHB | FAM75A5 | 60729372 | 0 | 0 | 0 |
| CHB | FAM75A5 | 60734372 | 0 | 0 | 0 |
| CHB | FAM75A5 | 60739372 | 0 | 0 | 0 |
| CHB | FAM75A5 | 60744372 | 0 | 0 | 0 |
| CHB | FAM75A5 | 60749372 | 0 | 0 | 0 |
| CHB | FAM75A5 | 60754372 | 0 | 0 | 0 |
| CHB | FAM75A5 | 60759372 | 0 | 0 | 0 |
| CHB | FAM75A5 | 60764372 | 0 | 0 | 0 |
| CHB | FAM75A5 | 60769372 | 0 | 0 | 0 |
| CHB | FAM75A5 | 60774372 | 0 | 0 | 0 |
| CHB | FAM75A5 | 60779372 | 0 | 0 | 0 |
| CHB | FAM75A5 | 60784372 | 0 | 0 | 0 |
| CHB | FAM75A5 | 60789372 | 0 | 0 | 0 |
| CHB | FAM75A5 | 60794372 | 0 | 0 | 0 |
| CHB | FAM75A5 | 60799372 | 0 | 0 | 0 |
| CHB | FAM75A5 | 60804372 | 0 | 0 | 0 |
| CHB | FAM75A5 | 60809372 | 0 | 0 | 0 |
| CHB | FAM75A5 | 60814372 | 0 | 0 | 0 |
| CHB | FAM75A5 | 60819372 | 0 | 0 | 0 |
| CHB | FAM75A5 | 60824372 | 0 | 0 | 0 |
| CHB | FAM75A5 | 60829372 | 0 | 0 | 0 |
| CHB | FAM75A5 | 60834372 | 0 | 0 | 0 |
| CHB | FAM75A5 | 60839372 | 0 | 0 | 0 |
| CHB | FAM75A5 | 60844372 | 0 | 0 | 0 |
| CHB | FAM75A5 | 60849372 | 0 | 0 | 0 |
| CHB | FAM75A5 | 60854372 | 0 | 0 | 0 |
| CHB | FAM75A5 | 60859372 | 0 | 0 | 0 |
| CHB | FAM75A5 | 60864372 | 0 | 0 | 0 |
| CHB | FAM75A5 | 60869372 | 0 | 0 | 0 |
| CHB | FAM75A5 | 60874372 | 0 | 0 | 0 |
| CHB | FAM75A5 | 60879372 | 0 | 0 | 0 |
| CHB | FAM75A5 | 60884372 | 0 | 0 | 0 |
| CHB | FAM75A5 | 60889372 | 0 | 0 | 0 |

## 2\_TajimasD\_data

|     |         |          |   |   |   |
|-----|---------|----------|---|---|---|
| CHB | FAM75A5 | 60894372 | 0 | 0 | 0 |
| CHB | FAM75A5 | 60899372 | 0 | 0 | 0 |
| CHB | FAM75A5 | 60904372 | 0 | 0 | 0 |
| CHB | FAM75A5 | 60909372 | 0 | 0 | 0 |
| CHB | FAM75A5 | 60914372 | 0 | 0 | 0 |
| CHB | FAM75A5 | 60919372 | 0 | 0 | 0 |
| CHB | FAM75A5 | 60924372 | 0 | 0 | 0 |
| CHB | FAM75A5 | 60929372 | 0 | 0 | 0 |
| CHB | FAM75A5 | 60934372 | 0 | 0 | 0 |
| CHB | FAM75A5 | 60939372 | 0 | 0 | 0 |
| CHB | FAM75A5 | 60944372 | 0 | 0 | 0 |
| CHB | FAM75A5 | 60949372 | 0 | 0 | 0 |
| CHB | FAM75A5 | 60954372 | 0 | 0 | 0 |
| CHB | FAM75A5 | 60959372 | 0 | 0 | 0 |
| CHB | FAM75A5 | 60964372 | 0 | 0 | 0 |
| CHB | FAM75A5 | 60969372 | 0 | 0 | 0 |
| CHB | FAM75A5 | 60974372 | 0 | 0 | 0 |
| CHB | FAM75A5 | 60979372 | 0 | 0 | 0 |
| CHB | FAM75A5 | 60984372 | 0 | 0 | 0 |
| CHB | FAM75A5 | 60989372 | 0 | 0 | 0 |
| CHB | FAM75A5 | 60994372 | 0 | 0 | 0 |
| CHB | FAM75A5 | 60999372 | 0 | 0 | 0 |
| CHB | FAM75A5 | 61004372 | 0 | 0 | 0 |
| CHB | FAM75A5 | 61009372 | 0 | 0 | 0 |
| CHB | FAM75A5 | 61014372 | 0 | 0 | 0 |
| CHB | FAM75A5 | 61019372 | 0 | 0 | 0 |
| CHB | FAM75A5 | 61024372 | 0 | 0 | 0 |
| CHB | FAM75A5 | 61029372 | 0 | 0 | 0 |
| CHB | FAM75A5 | 61034372 | 0 | 0 | 0 |
| CHB | FAM75A5 | 61039372 | 0 | 0 | 0 |
| CHB | FAM75A5 | 61044372 | 0 | 0 | 0 |
| CHB | FAM75A5 | 61049372 | 0 | 0 | 0 |
| CHB | FAM75A5 | 61054372 | 0 | 0 | 0 |
| CHB | FAM75A5 | 61059372 | 0 | 0 | 0 |
| CHB | FAM75A5 | 61064372 | 0 | 0 | 0 |
| CHB | FAM75A5 | 61069372 | 0 | 0 | 0 |
| CHB | FAM75A5 | 61074372 | 0 | 0 | 0 |
| CHB | FAM75A5 | 61079372 | 0 | 0 | 0 |
| CHB | FAM75A5 | 61084372 | 0 | 0 | 0 |
| CHB | FAM75A5 | 61089372 | 0 | 0 | 0 |
| CHB | FAM75A5 | 61094372 | 0 | 0 | 0 |
| CHB | FAM75A5 | 61099372 | 0 | 0 | 0 |
| CHB | FAM75A5 | 61104372 | 0 | 0 | 0 |
| CHB | FAM75A5 | 61109372 | 0 | 0 | 0 |
| CHB | FAM75A5 | 61114372 | 0 | 0 | 0 |
| CHB | FAM75A5 | 61119372 | 0 | 0 | 0 |
| CHB | FAM75A5 | 61124372 | 0 | 0 | 0 |
| CHB | FAM75A5 | 61129372 | 0 | 0 | 0 |
| CHB | FAM75A5 | 61134372 | 0 | 0 | 0 |

## 2\_TajimasD\_data

|     |         |          |   |   |   |
|-----|---------|----------|---|---|---|
| CHB | FAM75A5 | 61139372 | 0 | 0 | 0 |
| CHB | FAM75A5 | 61144372 | 0 | 0 | 0 |
| CHB | FAM75A5 | 61149372 | 0 | 0 | 0 |
| CHB | FAM75A5 | 61154372 | 0 | 0 | 0 |
| CHB | FAM75A5 | 61159372 | 0 | 0 | 0 |
| CHB | FAM75A5 | 61164372 | 0 | 0 | 0 |
| CHB | FAM75A5 | 61169372 | 0 | 0 | 0 |
| CHB | FAM75A5 | 61174372 | 0 | 0 | 0 |
| CHB | FAM75A5 | 61179372 | 0 | 0 | 0 |
| CHB | FAM75A5 | 61184372 | 0 | 0 | 0 |
| CHB | FAM75A5 | 61189372 | 0 | 0 | 0 |
| CHB | FAM75A5 | 61194372 | 0 | 0 | 0 |
| CHB | FAM75A5 | 61199372 | 0 | 0 | 0 |
| CHB | FAM75A5 | 61204372 | 0 | 0 | 0 |
| CHB | FAM75A5 | 61209372 | 0 | 0 | 0 |
| CHB | FAM75A5 | 61214372 | 0 | 0 | 0 |
| CHB | FAM75A5 | 61219372 | 0 | 0 | 0 |
| CHB | FAM75A5 | 61224372 | 0 | 0 | 0 |
| CHB | FAM75A5 | 61229372 | 0 | 0 | 0 |
| CHB | FAM75A5 | 61234372 | 0 | 0 | 0 |
| CHB | FAM75A5 | 61239372 | 0 | 0 | 0 |
| CHB | FAM75A5 | 61244372 | 0 | 0 | 0 |
| CHB | FAM75A5 | 61249372 | 0 | 0 | 0 |
| CHB | FAM75A5 | 61254372 | 0 | 0 | 0 |
| CHB | FAM75A5 | 61259372 | 0 | 0 | 0 |
| CHB | FAM75A5 | 61264372 | 0 | 0 | 0 |
| CHB | FAM75A5 | 61269372 | 0 | 0 | 0 |
| CHB | FAM75A5 | 61274372 | 0 | 0 | 0 |
| CHB | FAM75A5 | 61279372 | 0 | 0 | 0 |
| CHB | FAM75A5 | 61284372 | 0 | 0 | 0 |
| CHB | FAM75A5 | 61289372 | 0 | 0 | 0 |
| CHB | FAM75A5 | 61294372 | 0 | 0 | 0 |
| CHB | FAM75A5 | 61299372 | 0 | 0 | 0 |
| CHB | FAM75A5 | 61304372 | 0 | 0 | 0 |
| CHB | FAM75A5 | 61309372 | 0 | 0 | 0 |
| CHB | FAM75A5 | 61314372 | 0 | 0 | 0 |
| CHB | FAM75A5 | 61319372 | 0 | 0 | 0 |
| CHB | FAM75A5 | 61324372 | 0 | 0 | 0 |
| CHB | FAM75A5 | 61329372 | 0 | 0 | 0 |
| CHB | FAM75A5 | 61334372 | 0 | 0 | 0 |
| CHB | FAM75A5 | 61339372 | 0 | 0 | 0 |
| CHB | FAM75A5 | 61344372 | 0 | 0 | 0 |
| CHB | FAM75A5 | 61349372 | 0 | 0 | 0 |
| CHB | FAM75A5 | 61354372 | 0 | 0 | 0 |
| CHB | FAM75A5 | 61359372 | 0 | 0 | 0 |
| CHB | FAM75A5 | 61364372 | 0 | 0 | 0 |
| CHB | FAM75A5 | 61369372 | 0 | 0 | 0 |
| CHB | FAM75A5 | 61374372 | 0 | 0 | 0 |
| CHB | FAM75A5 | 61379372 | 0 | 0 | 0 |



## 2\_TajimasD\_data

|     |         |          |   |   |   |
|-----|---------|----------|---|---|---|
| CHB | FAM75A5 | 61384372 | 0 | 0 | 0 |
| CHB | FAM75A5 | 61389372 | 0 | 0 | 0 |
| CHB | FAM75A5 | 61394372 | 0 | 0 | 0 |
| CHB | FAM75A5 | 61399372 | 0 | 0 | 0 |
| CHB | FAM75A5 | 61404372 | 0 | 0 | 0 |
| CHB | FAM75A5 | 61409372 | 0 | 0 | 0 |
| CHB | FAM75A5 | 61414372 | 0 | 0 | 0 |
| YRI | FAM75A5 | 60419372 | 0 | 0 | 0 |
| YRI | FAM75A5 | 60424372 | 0 | 0 | 0 |
| YRI | FAM75A5 | 60429372 | 0 | 0 | 0 |
| YRI | FAM75A5 | 60434372 | 0 | 0 | 0 |
| YRI | FAM75A5 | 60439372 | 0 | 0 | 0 |
| YRI | FAM75A5 | 60444372 | 0 | 0 | 0 |
| YRI | FAM75A5 | 60449372 | 0 | 0 | 0 |
| YRI | FAM75A5 | 60454372 | 0 | 0 | 0 |
| YRI | FAM75A5 | 60459372 | 0 | 0 | 0 |
| YRI | FAM75A5 | 60464372 | 0 | 0 | 0 |
| YRI | FAM75A5 | 60469372 | 0 | 0 | 0 |
| YRI | FAM75A5 | 60474372 | 0 | 0 | 0 |
| YRI | FAM75A5 | 60479372 | 0 | 0 | 0 |
| YRI | FAM75A5 | 60484372 | 0 | 0 | 0 |
| YRI | FAM75A5 | 60489372 | 0 | 0 | 0 |
| YRI | FAM75A5 | 60494372 | 0 | 0 | 0 |
| YRI | FAM75A5 | 60499372 | 0 | 0 | 0 |
| YRI | FAM75A5 | 60504372 | 0 | 0 | 0 |
| YRI | FAM75A5 | 60509372 | 0 | 0 | 0 |
| YRI | FAM75A5 | 60514372 | 0 | 0 | 0 |
| YRI | FAM75A5 | 60519372 | 0 | 0 | 0 |
| YRI | FAM75A5 | 60524372 | 0 | 0 | 0 |
| YRI | FAM75A5 | 60529372 | 0 | 0 | 0 |
| YRI | FAM75A5 | 60534372 | 0 | 0 | 0 |
| YRI | FAM75A5 | 60539372 | 0 | 0 | 0 |
| YRI | FAM75A5 | 60544372 | 0 | 0 | 0 |
| YRI | FAM75A5 | 60549372 | 0 | 0 | 0 |
| YRI | FAM75A5 | 60554372 | 0 | 0 | 0 |
| YRI | FAM75A5 | 60559372 | 0 | 0 | 0 |
| YRI | FAM75A5 | 60564372 | 0 | 0 | 0 |
| YRI | FAM75A5 | 60569372 | 0 | 0 | 0 |
| YRI | FAM75A5 | 60574372 | 0 | 0 | 0 |
| YRI | FAM75A5 | 60579372 | 0 | 0 | 0 |
| YRI | FAM75A5 | 60584372 | 0 | 0 | 0 |
| YRI | FAM75A5 | 60589372 | 0 | 0 | 0 |
| YRI | FAM75A5 | 60594372 | 0 | 0 | 0 |
| YRI | FAM75A5 | 60599372 | 0 | 0 | 0 |
| YRI | FAM75A5 | 60604372 | 0 | 0 | 0 |
| YRI | FAM75A5 | 60609372 | 0 | 0 | 0 |
| YRI | FAM75A5 | 60614372 | 0 | 0 | 0 |
| YRI | FAM75A5 | 60619372 | 0 | 0 | 0 |
| YRI | FAM75A5 | 60624372 | 0 | 0 | 0 |

## 2\_TajimasD\_data

|     |         |          |   |   |   |
|-----|---------|----------|---|---|---|
| YRI | FAM75A5 | 60629372 | 0 | 0 | 0 |
| YRI | FAM75A5 | 60634372 | 0 | 0 | 0 |
| YRI | FAM75A5 | 60639372 | 0 | 0 | 0 |
| YRI | FAM75A5 | 60644372 | 0 | 0 | 0 |
| YRI | FAM75A5 | 60649372 | 0 | 0 | 0 |
| YRI | FAM75A5 | 60654372 | 0 | 0 | 0 |
| YRI | FAM75A5 | 60659372 | 0 | 0 | 0 |
| YRI | FAM75A5 | 60664372 | 0 | 0 | 0 |
| YRI | FAM75A5 | 60669372 | 0 | 0 | 0 |
| YRI | FAM75A5 | 60674372 | 0 | 0 | 0 |
| YRI | FAM75A5 | 60679372 | 0 | 0 | 0 |
| YRI | FAM75A5 | 60684372 | 0 | 0 | 0 |
| YRI | FAM75A5 | 60689372 | 0 | 0 | 0 |
| YRI | FAM75A5 | 60694372 | 0 | 0 | 0 |
| YRI | FAM75A5 | 60699372 | 0 | 0 | 0 |
| YRI | FAM75A5 | 60704372 | 0 | 0 | 0 |
| YRI | FAM75A5 | 60709372 | 0 | 0 | 0 |
| YRI | FAM75A5 | 60714372 | 0 | 0 | 0 |
| YRI | FAM75A5 | 60719372 | 0 | 0 | 0 |
| YRI | FAM75A5 | 60724372 | 0 | 0 | 0 |
| YRI | FAM75A5 | 60729372 | 0 | 0 | 0 |
| YRI | FAM75A5 | 60734372 | 0 | 0 | 0 |
| YRI | FAM75A5 | 60739372 | 0 | 0 | 0 |
| YRI | FAM75A5 | 60744372 | 0 | 0 | 0 |
| YRI | FAM75A5 | 60749372 | 0 | 0 | 0 |
| YRI | FAM75A5 | 60754372 | 0 | 0 | 0 |
| YRI | FAM75A5 | 60759372 | 0 | 0 | 0 |
| YRI | FAM75A5 | 60764372 | 0 | 0 | 0 |
| YRI | FAM75A5 | 60769372 | 0 | 0 | 0 |
| YRI | FAM75A5 | 60774372 | 0 | 0 | 0 |
| YRI | FAM75A5 | 60779372 | 0 | 0 | 0 |
| YRI | FAM75A5 | 60784372 | 0 | 0 | 0 |
| YRI | FAM75A5 | 60789372 | 0 | 0 | 0 |
| YRI | FAM75A5 | 60794372 | 0 | 0 | 0 |
| YRI | FAM75A5 | 60799372 | 0 | 0 | 0 |
| YRI | FAM75A5 | 60804372 | 0 | 0 | 0 |
| YRI | FAM75A5 | 60809372 | 0 | 0 | 0 |
| YRI | FAM75A5 | 60814372 | 0 | 0 | 0 |
| YRI | FAM75A5 | 60819372 | 0 | 0 | 0 |
| YRI | FAM75A5 | 60824372 | 0 | 0 | 0 |
| YRI | FAM75A5 | 60829372 | 0 | 0 | 0 |
| YRI | FAM75A5 | 60834372 | 0 | 0 | 0 |
| YRI | FAM75A5 | 60839372 | 0 | 0 | 0 |
| YRI | FAM75A5 | 60844372 | 0 | 0 | 0 |
| YRI | FAM75A5 | 60849372 | 0 | 0 | 0 |
| YRI | FAM75A5 | 60854372 | 0 | 0 | 0 |
| YRI | FAM75A5 | 60859372 | 0 | 0 | 0 |
| YRI | FAM75A5 | 60864372 | 0 | 0 | 0 |
| YRI | FAM75A5 | 60869372 | 0 | 0 | 0 |

## 2\_TajimasD\_data

|     |         |          |   |   |   |
|-----|---------|----------|---|---|---|
| YRI | FAM75A5 | 60874372 | 0 | 0 | 0 |
| YRI | FAM75A5 | 60879372 | 0 | 0 | 0 |
| YRI | FAM75A5 | 60884372 | 0 | 0 | 0 |
| YRI | FAM75A5 | 60889372 | 0 | 0 | 0 |
| YRI | FAM75A5 | 60894372 | 0 | 0 | 0 |
| YRI | FAM75A5 | 60899372 | 0 | 0 | 0 |
| YRI | FAM75A5 | 60904372 | 0 | 0 | 0 |
| YRI | FAM75A5 | 60909372 | 0 | 0 | 0 |
| YRI | FAM75A5 | 60914372 | 0 | 0 | 0 |
| YRI | FAM75A5 | 60919372 | 0 | 0 | 0 |
| YRI | FAM75A5 | 60924372 | 0 | 0 | 0 |
| YRI | FAM75A5 | 60929372 | 0 | 0 | 0 |
| YRI | FAM75A5 | 60934372 | 0 | 0 | 0 |
| YRI | FAM75A5 | 60939372 | 0 | 0 | 0 |
| YRI | FAM75A5 | 60944372 | 0 | 0 | 0 |
| YRI | FAM75A5 | 60949372 | 0 | 0 | 0 |
| YRI | FAM75A5 | 60954372 | 0 | 0 | 0 |
| YRI | FAM75A5 | 60959372 | 0 | 0 | 0 |
| YRI | FAM75A5 | 60964372 | 0 | 0 | 0 |
| YRI | FAM75A5 | 60969372 | 0 | 0 | 0 |
| YRI | FAM75A5 | 60974372 | 0 | 0 | 0 |
| YRI | FAM75A5 | 60979372 | 0 | 0 | 0 |
| YRI | FAM75A5 | 60984372 | 0 | 0 | 0 |
| YRI | FAM75A5 | 60989372 | 0 | 0 | 0 |
| YRI | FAM75A5 | 60994372 | 0 | 0 | 0 |
| YRI | FAM75A5 | 60999372 | 0 | 0 | 0 |
| YRI | FAM75A5 | 61004372 | 0 | 0 | 0 |
| YRI | FAM75A5 | 61009372 | 0 | 0 | 0 |
| YRI | FAM75A5 | 61014372 | 0 | 0 | 0 |
| YRI | FAM75A5 | 61019372 | 0 | 0 | 0 |
| YRI | FAM75A5 | 61024372 | 0 | 0 | 0 |
| YRI | FAM75A5 | 61029372 | 0 | 0 | 0 |
| YRI | FAM75A5 | 61034372 | 0 | 0 | 0 |
| YRI | FAM75A5 | 61039372 | 0 | 0 | 0 |
| YRI | FAM75A5 | 61044372 | 0 | 0 | 0 |
| YRI | FAM75A5 | 61049372 | 0 | 0 | 0 |
| YRI | FAM75A5 | 61054372 | 0 | 0 | 0 |
| YRI | FAM75A5 | 61059372 | 0 | 0 | 0 |
| YRI | FAM75A5 | 61064372 | 0 | 0 | 0 |
| YRI | FAM75A5 | 61069372 | 0 | 0 | 0 |
| YRI | FAM75A5 | 61074372 | 0 | 0 | 0 |
| YRI | FAM75A5 | 61079372 | 0 | 0 | 0 |
| YRI | FAM75A5 | 61084372 | 0 | 0 | 0 |
| YRI | FAM75A5 | 61089372 | 0 | 0 | 0 |
| YRI | FAM75A5 | 61094372 | 0 | 0 | 0 |
| YRI | FAM75A5 | 61099372 | 0 | 0 | 0 |
| YRI | FAM75A5 | 61104372 | 0 | 0 | 0 |
| YRI | FAM75A5 | 61109372 | 0 | 0 | 0 |
| YRI | FAM75A5 | 61114372 | 0 | 0 | 0 |

## 2\_TajimasD\_data

|     |         |          |   |   |   |
|-----|---------|----------|---|---|---|
| YRI | FAM75A5 | 61119372 | 0 | 0 | 0 |
| YRI | FAM75A5 | 61124372 | 0 | 0 | 0 |
| YRI | FAM75A5 | 61129372 | 0 | 0 | 0 |
| YRI | FAM75A5 | 61134372 | 0 | 0 | 0 |
| YRI | FAM75A5 | 61139372 | 0 | 0 | 0 |
| YRI | FAM75A5 | 61144372 | 0 | 0 | 0 |
| YRI | FAM75A5 | 61149372 | 0 | 0 | 0 |
| YRI | FAM75A5 | 61154372 | 0 | 0 | 0 |
| YRI | FAM75A5 | 61159372 | 0 | 0 | 0 |
| YRI | FAM75A5 | 61164372 | 0 | 0 | 0 |
| YRI | FAM75A5 | 61169372 | 0 | 0 | 0 |
| YRI | FAM75A5 | 61174372 | 0 | 0 | 0 |
| YRI | FAM75A5 | 61179372 | 0 | 0 | 0 |
| YRI | FAM75A5 | 61184372 | 0 | 0 | 0 |
| YRI | FAM75A5 | 61189372 | 0 | 0 | 0 |
| YRI | FAM75A5 | 61194372 | 0 | 0 | 0 |
| YRI | FAM75A5 | 61199372 | 0 | 0 | 0 |
| YRI | FAM75A5 | 61204372 | 0 | 0 | 0 |
| YRI | FAM75A5 | 61209372 | 0 | 0 | 0 |
| YRI | FAM75A5 | 61214372 | 0 | 0 | 0 |
| YRI | FAM75A5 | 61219372 | 0 | 0 | 0 |
| YRI | FAM75A5 | 61224372 | 0 | 0 | 0 |
| YRI | FAM75A5 | 61229372 | 0 | 0 | 0 |
| YRI | FAM75A5 | 61234372 | 0 | 0 | 0 |
| YRI | FAM75A5 | 61239372 | 0 | 0 | 0 |
| YRI | FAM75A5 | 61244372 | 0 | 0 | 0 |
| YRI | FAM75A5 | 61249372 | 0 | 0 | 0 |
| YRI | FAM75A5 | 61254372 | 0 | 0 | 0 |
| YRI | FAM75A5 | 61259372 | 0 | 0 | 0 |
| YRI | FAM75A5 | 61264372 | 0 | 0 | 0 |
| YRI | FAM75A5 | 61269372 | 0 | 0 | 0 |
| YRI | FAM75A5 | 61274372 | 0 | 0 | 0 |
| YRI | FAM75A5 | 61279372 | 0 | 0 | 0 |
| YRI | FAM75A5 | 61284372 | 0 | 0 | 0 |
| YRI | FAM75A5 | 61289372 | 0 | 0 | 0 |
| YRI | FAM75A5 | 61294372 | 0 | 0 | 0 |
| YRI | FAM75A5 | 61299372 | 0 | 0 | 0 |
| YRI | FAM75A5 | 61304372 | 0 | 0 | 0 |
| YRI | FAM75A5 | 61309372 | 0 | 0 | 0 |
| YRI | FAM75A5 | 61314372 | 0 | 0 | 0 |
| YRI | FAM75A5 | 61319372 | 0 | 0 | 0 |
| YRI | FAM75A5 | 61324372 | 0 | 0 | 0 |
| YRI | FAM75A5 | 61329372 | 0 | 0 | 0 |
| YRI | FAM75A5 | 61334372 | 0 | 0 | 0 |
| YRI | FAM75A5 | 61339372 | 0 | 0 | 0 |
| YRI | FAM75A5 | 61344372 | 0 | 0 | 0 |
| YRI | FAM75A5 | 61349372 | 0 | 0 | 0 |
| YRI | FAM75A5 | 61354372 | 0 | 0 | 0 |
| YRI | FAM75A5 | 61359372 | 0 | 0 | 0 |

## 2\_TajimasD\_data

|     |         |          |   |   |   |
|-----|---------|----------|---|---|---|
| YRI | FAM75A5 | 61364372 | 0 | 0 | 0 |
| YRI | FAM75A5 | 61369372 | 0 | 0 | 0 |
| YRI | FAM75A5 | 61374372 | 0 | 0 | 0 |
| YRI | FAM75A5 | 61379372 | 0 | 0 | 0 |
| YRI | FAM75A5 | 61384372 | 0 | 0 | 0 |
| YRI | FAM75A5 | 61389372 | 0 | 0 | 0 |
| YRI | FAM75A5 | 61394372 | 0 | 0 | 0 |
| YRI | FAM75A5 | 61399372 | 0 | 0 | 0 |
| YRI | FAM75A5 | 61404372 | 0 | 0 | 0 |
| YRI | FAM75A5 | 61409372 | 0 | 0 | 0 |
| YRI | FAM75A5 | 61414372 | 0 | 0 | 0 |
| CEU | FOXD4L2 | 65242146 | 0 | 0 | 0 |
| CEU | FOXD4L2 | 65247146 | 0 | 0 | 0 |
| CEU | FOXD4L2 | 65252146 | 0 | 0 | 0 |
| CEU | FOXD4L2 | 65257146 | 0 | 0 | 0 |
| CEU | FOXD4L2 | 65262146 | 0 | 0 | 0 |
| CEU | FOXD4L2 | 65267146 | 0 | 0 | 0 |
| CEU | FOXD4L2 | 65272146 | 0 | 0 | 0 |
| CEU | FOXD4L2 | 65277146 | 0 | 0 | 0 |
| CEU | FOXD4L2 | 65282146 | 0 | 0 | 0 |
| CEU | FOXD4L2 | 65287146 | 0 | 0 | 0 |
| CEU | FOXD4L2 | 65292146 | 0 | 0 | 0 |
| CEU | FOXD4L2 | 65297146 | 0 | 0 | 0 |
| CEU | FOXD4L2 | 65302146 | 0 | 0 | 0 |
| CEU | FOXD4L2 | 65307146 | 0 | 0 | 0 |
| CEU | FOXD4L2 | 65312146 | 0 | 0 | 0 |
| CEU | FOXD4L2 | 65317146 | 0 | 0 | 0 |
| CEU | FOXD4L2 | 65322146 | 0 | 0 | 0 |
| CEU | FOXD4L2 | 65327146 | 0 | 0 | 0 |
| CEU | FOXD4L2 | 65332146 | 0 | 0 | 0 |
| CEU | FOXD4L2 | 65337146 | 0 | 0 | 0 |
| CEU | FOXD4L2 | 65342146 | 0 | 0 | 0 |
| CEU | FOXD4L2 | 65347146 | 0 | 0 | 0 |
| CEU | FOXD4L2 | 65352146 | 0 | 0 | 0 |
| CEU | FOXD4L2 | 65357146 | 0 | 0 | 0 |
| CEU | FOXD4L2 | 65362146 | 0 | 0 | 0 |
| CEU | FOXD4L2 | 65367146 | 0 | 0 | 0 |
| CEU | FOXD4L2 | 65372146 | 0 | 0 | 0 |
| CEU | FOXD4L2 | 65377146 | 0 | 0 | 0 |
| CEU | FOXD4L2 | 65382146 | 0 | 0 | 0 |
| CEU | FOXD4L2 | 65387146 | 0 | 0 | 0 |
| CEU | FOXD4L2 | 65392146 | 0 | 0 | 0 |
| CEU | FOXD4L2 | 65397146 | 0 | 0 | 0 |
| CEU | FOXD4L2 | 65402146 | 0 | 0 | 0 |
| CEU | FOXD4L2 | 65407146 | 0 | 0 | 0 |
| CEU | FOXD4L2 | 65412146 | 0 | 0 | 0 |
| CEU | FOXD4L2 | 65417146 | 0 | 0 | 0 |
| CEU | FOXD4L2 | 65422146 | 0 | 0 | 0 |
| CEU | FOXD4L2 | 65427146 | 0 | 0 | 0 |

## 2\_TajimasD\_data

|     |         |          |        |         |         |
|-----|---------|----------|--------|---------|---------|
| CEU | FOXD4L2 | 65432146 | 0      | 0       | 0       |
| CEU | FOXD4L2 | 65437146 | 0      | 0       | 0       |
| CEU | FOXD4L2 | 65442146 | 0      | 0       | 0       |
| CEU | FOXD4L2 | 65447146 | 0      | 0       | 0       |
| CEU | FOXD4L2 | 65452146 | 0      | 0       | 0       |
| CEU | FOXD4L2 | 65457146 | 0      | 0       | 0       |
| CEU | FOXD4L2 | 65462146 | 0      | 0       | 0       |
| CEU | FOXD4L2 | 65467146 | 0.1585 | 0.1706  | -0.0719 |
| CEU | FOXD4L2 | 65472146 | 0.6937 | 0.6822  | 0.03    |
| CEU | FOXD4L2 | 65477146 | 0.7761 | 1.3645  | -0.9519 |
| CEU | FOXD4L2 | 65482146 | 1.3539 | 1.5351  | -0.2687 |
| CEU | FOXD4L2 | 65487146 | 1.113  | 0.6822  | 1.1249  |
| CEU | FOXD4L2 | 65492146 | 0      | 0       | 0       |
| CEU | FOXD4L2 | 65497146 | 0      | 0       | 0       |
| CEU | FOXD4L2 | 65502146 | 0      | 0       | 0       |
| CEU | FOXD4L2 | 65507146 | 0.0404 | 0.6822  | -1.6759 |
| CEU | FOXD4L2 | 65512146 | 0.0404 | 0.6822  | -1.6759 |
| CEU | FOXD4L2 | 65517146 | 0      | 0       | 0       |
| CEU | FOXD4L2 | 65522146 | 0      | 0       | 0       |
| CEU | FOXD4L2 | 65527146 | 0      | 0       | 0       |
| CEU | FOXD4L2 | 65532146 | 0      | 0       | 0       |
| CEU | FOXD4L2 | 65537146 | 0.0101 | 0.1706  | -0.9534 |
| CEU | FOXD4L2 | 65542146 | 0.0101 | 0.1706  | -0.9534 |
| CEU | FOXD4L2 | 65547146 | 0.873  | 0.5117  | 1.1331  |
| CEU | FOXD4L2 | 65552146 | 1.248  | 0.8528  | 0.89    |
| CEU | FOXD4L2 | 65557146 | 0.9382 | 1.3645  | -0.6897 |
| CEU | FOXD4L2 | 65562146 | 0.5834 | 1.3645  | -1.2637 |
| CEU | FOXD4L2 | 65567146 | 0.0202 | 0.3411  | -1.2864 |
| CEU | FOXD4L2 | 65572146 | 1.0396 | 0.8528  | 0.4207  |
| CEU | FOXD4L2 | 65577146 | 1.3063 | 1.0234  | 0.5621  |
| CEU | FOXD4L2 | 65582146 | 0.2667 | 0.1706  | 0.5709  |
| CEU | FOXD4L2 | 65587146 | 0      | 0       | 0       |
| CEU | FOXD4L2 | 65592146 | 1.523  | 2.0467  | -0.6231 |
| CEU | FOXD4L2 | 65597146 | 4.4308 | 6.3108  | -0.8631 |
| CEU | FOXD4L2 | 65602146 | 4.3875 | 9.5515  | -1.6223 |
| CEU | FOXD4L2 | 65607146 | 3.3554 | 8.3576  | -1.7781 |
| CEU | FOXD4L2 | 65612146 | 7.1383 | 9.0398  | -0.6287 |
| CEU | FOXD4L2 | 65617146 | 8.5768 | 10.916  | -0.6488 |
| CEU | FOXD4L2 | 65622146 | 5.7429 | 8.187   | -0.8854 |
| CEU | FOXD4L2 | 65627146 | 6.122  | 9.3809  | -1.0411 |
| CEU | FOXD4L2 | 65632146 | 6.6063 | 10.5749 | -1.1339 |
| CEU | FOXD4L2 | 65637146 | 3.1903 | 5.6286  | -1.2403 |
| CEU | FOXD4L2 | 65642146 | 0.375  | 1.5351  | -1.7202 |
| CEU | FOXD4L2 | 65647146 | 0.1078 | 0.5117  | -1.2667 |
| CEU | FOXD4L2 | 65652146 | 0.0101 | 0.1706  | -0.9534 |
| CEU | FOXD4L2 | 65657146 | 0      | 0       | 0       |
| CEU | FOXD4L2 | 65662146 | 0      | 0       | 0       |
| CEU | FOXD4L2 | 65667146 | 0      | 0       | 0       |
| CEU | FOXD4L2 | 65672146 | 0.04   | 0.1706  | -0.7758 |

## 2\_TajimasD\_data

|     |         |          |        |        |         |
|-----|---------|----------|--------|--------|---------|
| CEU | FOXD4L2 | 65677146 | 0.04   | 0.1706 | -0.7758 |
| CEU | FOXD4L2 | 65682146 | 0      | 0      | 0       |
| CEU | FOXD4L2 | 65687146 | 0.1328 | 0.3411 | -0.835  |
| CEU | FOXD4L2 | 65692146 | 0.1328 | 0.3411 | -0.835  |
| CEU | FOXD4L2 | 65697146 | 0      | 0      | 0       |
| CEU | FOXD4L2 | 65702146 | 0.02   | 0.1706 | -0.8946 |
| CEU | FOXD4L2 | 65707146 | 0.0301 | 0.3411 | -1.2467 |
| CEU | FOXD4L2 | 65712146 | 0.2016 | 0.3411 | -0.5592 |
| CEU | FOXD4L2 | 65717146 | 0.1915 | 0.1706 | 0.1242  |
| CEU | FOXD4L2 | 65722146 | 0      | 0      | 0       |
| CEU | FOXD4L2 | 65727146 | 0.0202 | 0.1706 | -0.8934 |
| CEU | FOXD4L2 | 65732146 | 0.0202 | 0.1706 | -0.8934 |
| CEU | FOXD4L2 | 65737146 | 0.3669 | 0.3411 | 0.1034  |
| CEU | FOXD4L2 | 65742146 | 0.5852 | 0.8528 | -0.6026 |
| CEU | FOXD4L2 | 65747146 | 0.4098 | 0.6822 | -0.7113 |
| CEU | FOXD4L2 | 65752146 | 0.3445 | 0.5117 | -0.5244 |
| CEU | FOXD4L2 | 65757146 | 0.2228 | 0.8528 | -1.4187 |
| CEU | FOXD4L2 | 65762146 | 0.2764 | 1.1939 | -1.635  |
| CEU | FOXD4L2 | 65767146 | 0.7547 | 1.8762 | -1.4279 |
| CEU | FOXD4L2 | 65772146 | 0.9695 | 1.7056 | -1.0082 |
| CEU | FOXD4L2 | 65777146 | 0.4995 | 0.6822 | -0.4771 |
| CEU | FOXD4L2 | 65782146 | 0.1078 | 0.3411 | -0.9352 |
| CEU | FOXD4L2 | 65787146 | 0.0398 | 0.3411 | -1.2078 |
| CEU | FOXD4L2 | 65792146 | 0.0303 | 0.3411 | -1.2459 |
| CEU | FOXD4L2 | 65797146 | 0.1651 | 0.5117 | -1.087  |
| CEU | FOXD4L2 | 65802146 | 0.1449 | 0.3411 | -0.7865 |
| CEU | FOXD4L2 | 65807146 | 0.0101 | 0.1706 | -0.9534 |
| CEU | FOXD4L2 | 65812146 | 0.0101 | 0.1706 | -0.9534 |
| CEU | FOXD4L2 | 65817146 | 0      | 0      | 0       |
| CEU | FOXD4L2 | 65822146 | 0.4455 | 0.5117 | -0.2076 |
| CEU | FOXD4L2 | 65827146 | 0.4455 | 0.5117 | -0.2076 |
| CEU | FOXD4L2 | 65832146 | 0      | 0      | 0       |
| CEU | FOXD4L2 | 65837146 | 0.0676 | 0.1706 | -0.6118 |
| CEU | FOXD4L2 | 65842146 | 0.0676 | 0.1706 | -0.6118 |
| CEU | FOXD4L2 | 65847146 | 0      | 0      | 0       |
| CEU | FOXD4L2 | 65852146 | 0      | 0      | 0       |
| CEU | FOXD4L2 | 65857146 | 0.4185 | 0.5117 | -0.2923 |
| CEU | FOXD4L2 | 65862146 | 0.5533 | 0.8528 | -0.6745 |
| CEU | FOXD4L2 | 65867146 | 0.5143 | 0.5117 | 0.0082  |
| CEU | FOXD4L2 | 65872146 | 0.4292 | 0.3411 | 0.3532  |
| CEU | FOXD4L2 | 65877146 | 1.1257 | 1.1939 | -0.1215 |
| CEU | FOXD4L2 | 65882146 | 1.0761 | 1.0234 | 0.1047  |
| CEU | FOXD4L2 | 65887146 | 0.4673 | 0.1706 | 1.7625  |
| CEU | FOXD4L2 | 65892146 | 2.0035 | 1.3645 | 1.0338  |
| CEU | FOXD4L2 | 65897146 | 1.6448 | 1.7056 | -0.0833 |
| CEU | FOXD4L2 | 65902146 | 0.1086 | 0.5117 | -1.2642 |
| CEU | FOXD4L2 | 65907146 | 0      | 0      | 0       |
| CEU | FOXD4L2 | 65912146 | 0.2111 | 0.3411 | -0.5211 |
| CEU | FOXD4L2 | 65917146 | 1.8213 | 1.5351 | 0.4244  |

## 2\_TajimasD\_data

|     |         |          |        |        |         |
|-----|---------|----------|--------|--------|---------|
| CEU | FOXD4L2 | 65922146 | 1.6102 | 1.1939 | 0.7419  |
| CEU | FOXD4L2 | 65927146 | 0      | 0      | 0       |
| CEU | FOXD4L2 | 65932146 | 0      | 0      | 0       |
| CEU | FOXD4L2 | 65937146 | 0      | 0      | 0       |
| CEU | FOXD4L2 | 65942146 | 0      | 0      | 0       |
| CEU | FOXD4L2 | 65947146 | 0      | 0      | 0       |
| CEU | FOXD4L2 | 65952146 | 0      | 0      | 0       |
| CEU | FOXD4L2 | 65957146 | 0      | 0      | 0       |
| CEU | FOXD4L2 | 65962146 | 0      | 0      | 0       |
| CEU | FOXD4L2 | 65967146 | 0.5246 | 0.6822 | -0.4115 |
| CEU | FOXD4L2 | 65972146 | 2.0656 | 1.7056 | 0.4931  |
| CEU | FOXD4L2 | 65977146 | 1.793  | 1.5351 | 0.3824  |
| CEU | FOXD4L2 | 65982146 | 0.302  | 0.8528 | -1.2404 |
| CEU | FOXD4L2 | 65987146 | 0.1765 | 0.8528 | -1.523  |
| CEU | FOXD4L2 | 65992146 | 0.3434 | 1.7056 | -1.8657 |
| CEU | FOXD4L2 | 65997146 | 0.227  | 1.3645 | -1.8402 |
| CEU | FOXD4L2 | 66002146 | 0.2579 | 0.5117 | -0.796  |
| CEU | FOXD4L2 | 66007146 | 1.0781 | 1.8762 | -1.0161 |
| CEU | FOXD4L2 | 66012146 | 1.396  | 2.2173 | -0.9175 |
| CEU | FOXD4L2 | 66017146 | 0.6259 | 1.3645 | -1.1949 |
| CEU | FOXD4L2 | 66022146 | 0.0804 | 1.0234 | -1.8738 |
| CEU | FOXD4L2 | 66027146 | 0.0303 | 0.5117 | -1.5098 |
| CEU | FOXD4L2 | 66032146 | 0.1771 | 0.8528 | -1.5217 |
| CEU | FOXD4L2 | 66037146 | 0.1771 | 0.8528 | -1.5217 |
| CEU | FOXD4L2 | 66042146 | 0.0202 | 0.3411 | -1.2864 |
| CEU | FOXD4L2 | 66047146 | 0.3418 | 1.1939 | -1.5185 |
| CEU | FOXD4L2 | 66052146 | 0.3418 | 1.1939 | -1.5185 |
| CEU | FOXD4L2 | 66057146 | 0.0101 | 0.1706 | -0.9534 |
| CEU | FOXD4L2 | 66062146 | 0      | 0      | 0       |
| CEU | FOXD4L2 | 66067146 | 0      | 0      | 0       |
| CEU | FOXD4L2 | 66072146 | 0.0101 | 0.1706 | -0.9534 |
| CEU | FOXD4L2 | 66077146 | 0.0101 | 0.1706 | -0.9534 |
| CEU | FOXD4L2 | 66082146 | 0.04   | 0.3411 | -1.207  |
| CEU | FOXD4L2 | 66087146 | 0.7912 | 0.8528 | -0.1387 |
| CEU | FOXD4L2 | 66092146 | 0.7512 | 0.5117 | 0.7511  |
| CEU | FOXD4L2 | 66097146 | 0.6184 | 0.6822 | -0.1666 |
| CEU | FOXD4L2 | 66102146 | 0.6184 | 0.6822 | -0.1666 |
| CEU | FOXD4L2 | 66107146 | 0.0398 | 0.1706 | -0.777  |
| CEU | FOXD4L2 | 66112146 | 0.6613 | 1.3645 | -1.1376 |
| CEU | FOXD4L2 | 66117146 | 0.9928 | 2.3879 | -1.4692 |
| CEU | FOXD4L2 | 66122146 | 0.3713 | 1.1939 | -1.4659 |
| CEU | FOXD4L2 | 66127146 | 0.1002 | 0.6822 | -1.5198 |
| CEU | FOXD4L2 | 66132146 | 0.1002 | 0.6822 | -1.5198 |
| CEU | FOXD4L2 | 66137146 | 0.0992 | 0.6822 | -1.5224 |
| CEU | FOXD4L2 | 66142146 | 0.0992 | 0.6822 | -1.5224 |
| CEU | FOXD4L2 | 66147146 | 0.0101 | 0.1706 | -0.9534 |
| CEU | FOXD4L2 | 66152146 | 0.0101 | 0.1706 | -0.9534 |
| CEU | FOXD4L2 | 66157146 | 0      | 0      | 0       |
| CEU | FOXD4L2 | 66162146 | 0.4745 | 0.1706 | 1.8052  |



## 2\_TajimasD\_data

|     |         |          |        |        |        |
|-----|---------|----------|--------|--------|--------|
| CEU | FOXD4L2 | 66167146 | 0.4745 | 0.1706 | 1.8052 |
| CEU | FOXD4L2 | 66172146 | 0      | 0      | 0      |
| CEU | FOXD4L2 | 66177146 | 0      | 0      | 0      |
| CEU | FOXD4L2 | 66182146 | 0      | 0      | 0      |
| CEU | FOXD4L2 | 66187146 | 0      | 0      | 0      |
| CEU | FOXD4L2 | 66192146 | 0      | 0      | 0      |
| CEU | FOXD4L2 | 66197146 | 0      | 0      | 0      |
| CEU | FOXD4L2 | 66202146 | 0      | 0      | 0      |
| CEU | FOXD4L2 | 66207146 | 0      | 0      | 0      |
| CEU | FOXD4L2 | 66212146 | 0      | 0      | 0      |
| CEU | FOXD4L2 | 66217146 | 0      | 0      | 0      |
| CEU | FOXD4L2 | 66222146 | 0      | 0      | 0      |
| CEU | FOXD4L2 | 66227146 | 0      | 0      | 0      |
| CEU | FOXD4L2 | 66232146 | 0      | 0      | 0      |
| CHB | FOXD4L2 | 65242146 | 0      | 0      | 0      |
| CHB | FOXD4L2 | 65247146 | 0      | 0      | 0      |
| CHB | FOXD4L2 | 65252146 | 0      | 0      | 0      |
| CHB | FOXD4L2 | 65257146 | 0      | 0      | 0      |
| CHB | FOXD4L2 | 65262146 | 0      | 0      | 0      |
| CHB | FOXD4L2 | 65267146 | 0      | 0      | 0      |
| CHB | FOXD4L2 | 65272146 | 0      | 0      | 0      |
| CHB | FOXD4L2 | 65277146 | 0      | 0      | 0      |
| CHB | FOXD4L2 | 65282146 | 0      | 0      | 0      |
| CHB | FOXD4L2 | 65287146 | 0      | 0      | 0      |
| CHB | FOXD4L2 | 65292146 | 0      | 0      | 0      |
| CHB | FOXD4L2 | 65297146 | 0      | 0      | 0      |
| CHB | FOXD4L2 | 65302146 | 0      | 0      | 0      |
| CHB | FOXD4L2 | 65307146 | 0      | 0      | 0      |
| CHB | FOXD4L2 | 65312146 | 0      | 0      | 0      |
| CHB | FOXD4L2 | 65317146 | 0      | 0      | 0      |
| CHB | FOXD4L2 | 65322146 | 0      | 0      | 0      |
| CHB | FOXD4L2 | 65327146 | 0      | 0      | 0      |
| CHB | FOXD4L2 | 65332146 | 0      | 0      | 0      |
| CHB | FOXD4L2 | 65337146 | 0      | 0      | 0      |
| CHB | FOXD4L2 | 65342146 | 0      | 0      | 0      |
| CHB | FOXD4L2 | 65347146 | 0      | 0      | 0      |
| CHB | FOXD4L2 | 65352146 | 0      | 0      | 0      |
| CHB | FOXD4L2 | 65357146 | 0      | 0      | 0      |
| CHB | FOXD4L2 | 65362146 | 0      | 0      | 0      |
| CHB | FOXD4L2 | 65367146 | 0      | 0      | 0      |
| CHB | FOXD4L2 | 65372146 | 0      | 0      | 0      |
| CHB | FOXD4L2 | 65377146 | 0      | 0      | 0      |
| CHB | FOXD4L2 | 65382146 | 0      | 0      | 0      |
| CHB | FOXD4L2 | 65387146 | 0      | 0      | 0      |
| CHB | FOXD4L2 | 65392146 | 0      | 0      | 0      |
| CHB | FOXD4L2 | 65397146 | 0      | 0      | 0      |
| CHB | FOXD4L2 | 65402146 | 0      | 0      | 0      |
| CHB | FOXD4L2 | 65407146 | 0      | 0      | 0      |
| CHB | FOXD4L2 | 65412146 | 0      | 0      | 0      |

## 2\_TajimasD\_data

|     |         |          |        |         |         |
|-----|---------|----------|--------|---------|---------|
| CHB | FOXD4L2 | 65417146 | 0      | 0       | 0       |
| CHB | FOXD4L2 | 65422146 | 0      | 0       | 0       |
| CHB | FOXD4L2 | 65427146 | 0      | 0       | 0       |
| CHB | FOXD4L2 | 65432146 | 0      | 0       | 0       |
| CHB | FOXD4L2 | 65437146 | 0      | 0       | 0       |
| CHB | FOXD4L2 | 65442146 | 0      | 0       | 0       |
| CHB | FOXD4L2 | 65447146 | 0      | 0       | 0       |
| CHB | FOXD4L2 | 65452146 | 0      | 0       | 0       |
| CHB | FOXD4L2 | 65457146 | 0      | 0       | 0       |
| CHB | FOXD4L2 | 65462146 | 0      | 0       | 0       |
| CHB | FOXD4L2 | 65467146 | 0.0674 | 0.3388  | -1.0887 |
| CHB | FOXD4L2 | 65472146 | 0.5772 | 0.8471  | -0.6086 |
| CHB | FOXD4L2 | 65477146 | 1.0219 | 0.8471  | 0.3942  |
| CHB | FOXD4L2 | 65482146 | 0.9219 | 0.8471  | 0.1687  |
| CHB | FOXD4L2 | 65487146 | 0.4099 | 0.5082  | -0.3086 |
| CHB | FOXD4L2 | 65492146 | 0      | 0       | 0       |
| CHB | FOXD4L2 | 65497146 | 0      | 0       | 0       |
| CHB | FOXD4L2 | 65502146 | 0      | 0       | 0       |
| CHB | FOXD4L2 | 65507146 | 0      | 0       | 0       |
| CHB | FOXD4L2 | 65512146 | 0.0097 | 0.1694  | -0.949  |
| CHB | FOXD4L2 | 65517146 | 0.0097 | 0.1694  | -0.949  |
| CHB | FOXD4L2 | 65522146 | 0      | 0       | 0       |
| CHB | FOXD4L2 | 65527146 | 0.0388 | 0.6777  | -1.6703 |
| CHB | FOXD4L2 | 65532146 | 0.0388 | 0.6777  | -1.6703 |
| CHB | FOXD4L2 | 65537146 | 0      | 0       | 0       |
| CHB | FOXD4L2 | 65542146 | 0      | 0       | 0       |
| CHB | FOXD4L2 | 65547146 | 0.5561 | 0.8471  | -0.6562 |
| CHB | FOXD4L2 | 65552146 | 0.8608 | 1.6942  | -1.1437 |
| CHB | FOXD4L2 | 65557146 | 0.4483 | 1.8636  | -1.8057 |
| CHB | FOXD4L2 | 65562146 | 0.1435 | 1.0165  | -1.7373 |
| CHB | FOXD4L2 | 65567146 | 0      | 0       | 0       |
| CHB | FOXD4L2 | 65572146 | 1.0781 | 0.6777  | 1.0468  |
| CHB | FOXD4L2 | 65577146 | 1.3939 | 0.8471  | 1.233   |
| CHB | FOXD4L2 | 65582146 | 0.3158 | 0.1694  | 0.8699  |
| CHB | FOXD4L2 | 65587146 | 0      | 0       | 0       |
| CHB | FOXD4L2 | 65592146 | 1.8262 | 2.5412  | -0.714  |
| CHB | FOXD4L2 | 65597146 | 4.379  | 5.9295  | -0.7506 |
| CHB | FOXD4L2 | 65602146 | 3.6581 | 6.6072  | -1.2953 |
| CHB | FOXD4L2 | 65607146 | 2.9417 | 5.4213  | -1.3002 |
| CHB | FOXD4L2 | 65612146 | 5.2551 | 7.7931  | -0.9592 |
| CHB | FOXD4L2 | 65617146 | 5.4748 | 10.3343 | -1.4145 |
| CHB | FOXD4L2 | 65622146 | 4.4017 | 7.4543  | -1.2016 |
| CHB | FOXD4L2 | 65627146 | 6.0029 | 7.9625  | -0.7262 |
| CHB | FOXD4L2 | 65632146 | 6.1694 | 9.1484  | -0.9713 |
| CHB | FOXD4L2 | 65637146 | 2.5315 | 4.066   | -1.0348 |
| CHB | FOXD4L2 | 65642146 | 0.0194 | 0.1694  | -0.8913 |
| CHB | FOXD4L2 | 65647146 | 0.0194 | 0.1694  | -0.8913 |
| CHB | FOXD4L2 | 65652146 | 0.0194 | 0.1694  | -0.8913 |
| CHB | FOXD4L2 | 65657146 | 0      | 0       | 0       |

## 2\_TajimasD\_data

|     |         |          |        |        |         |
|-----|---------|----------|--------|--------|---------|
| CHB | FOXD4L2 | 65662146 | 0      | 0      | 0       |
| CHB | FOXD4L2 | 65667146 | 0      | 0      | 0       |
| CHB | FOXD4L2 | 65672146 | 0.0097 | 0.1694 | -0.949  |
| CHB | FOXD4L2 | 65677146 | 0.0097 | 0.1694 | -0.949  |
| CHB | FOXD4L2 | 65682146 | 0      | 0      | 0       |
| CHB | FOXD4L2 | 65687146 | 0.1881 | 0.3388 | -0.6045 |
| CHB | FOXD4L2 | 65692146 | 0.2075 | 0.5082 | -0.9439 |
| CHB | FOXD4L2 | 65697146 | 0.0194 | 0.1694 | -0.8913 |
| CHB | FOXD4L2 | 65702146 | 0      | 0      | 0       |
| CHB | FOXD4L2 | 65707146 | 0      | 0      | 0       |
| CHB | FOXD4L2 | 65712146 | 0.3859 | 0.1694 | 1.2865  |
| CHB | FOXD4L2 | 65717146 | 0.3859 | 0.1694 | 1.2865  |
| CHB | FOXD4L2 | 65722146 | 0      | 0      | 0       |
| CHB | FOXD4L2 | 65727146 | 0      | 0      | 0       |
| CHB | FOXD4L2 | 65732146 | 0      | 0      | 0       |
| CHB | FOXD4L2 | 65737146 | 0.7717 | 0.3388 | 1.7365  |
| CHB | FOXD4L2 | 65742146 | 1.1342 | 0.6777 | 1.1934  |
| CHB | FOXD4L2 | 65747146 | 0.6901 | 0.5082 | 0.571   |
| CHB | FOXD4L2 | 65752146 | 0.6551 | 0.5082 | 0.4611  |
| CHB | FOXD4L2 | 65757146 | 0.3468 | 0.5082 | -0.5067 |
| CHB | FOXD4L2 | 65762146 | 0.301  | 0.6777 | -0.9848 |
| CHB | FOXD4L2 | 65767146 | 0.6141 | 1.0165 | -0.8008 |
| CHB | FOXD4L2 | 65772146 | 0.8555 | 1.0165 | -0.3204 |
| CHB | FOXD4L2 | 65777146 | 0.5422 | 0.6777 | -0.3542 |
| CHB | FOXD4L2 | 65782146 | 0.0482 | 0.5082 | -1.444  |
| CHB | FOXD4L2 | 65787146 | 0.0289 | 0.3388 | -1.2431 |
| CHB | FOXD4L2 | 65792146 | 0      | 0.1694 | -1.0066 |
| CHB | FOXD4L2 | 65797146 | 0.1498 | 0.6777 | -1.3801 |
| CHB | FOXD4L2 | 65802146 | 0.1498 | 0.5082 | -1.1251 |
| CHB | FOXD4L2 | 65807146 | 0.0097 | 0.1694 | -0.949  |
| CHB | FOXD4L2 | 65812146 | 0.0579 | 0.5082 | -1.4136 |
| CHB | FOXD4L2 | 65817146 | 0.0482 | 0.3388 | -1.1657 |
| CHB | FOXD4L2 | 65822146 | 0.4139 | 0.5082 | -0.296  |
| CHB | FOXD4L2 | 65827146 | 0.4139 | 0.5082 | -0.296  |
| CHB | FOXD4L2 | 65832146 | 0      | 0      | 0       |
| CHB | FOXD4L2 | 65837146 | 0.1272 | 0.1694 | -0.2508 |
| CHB | FOXD4L2 | 65842146 | 0.2031 | 0.5082 | -0.9578 |
| CHB | FOXD4L2 | 65847146 | 0.076  | 0.3388 | -1.0542 |
| CHB | FOXD4L2 | 65852146 | 0      | 0      | 0       |
| CHB | FOXD4L2 | 65857146 | 0.1763 | 0.3388 | -0.6518 |
| CHB | FOXD4L2 | 65862146 | 0.186  | 0.5082 | -1.0114 |
| CHB | FOXD4L2 | 65867146 | 0.17   | 0.3388 | -0.6771 |
| CHB | FOXD4L2 | 65872146 | 0.3967 | 0.3388 | 0.2323  |
| CHB | FOXD4L2 | 65877146 | 1.1003 | 0.6777 | 1.1048  |
| CHB | FOXD4L2 | 65882146 | 0.8639 | 0.5082 | 1.1166  |
| CHB | FOXD4L2 | 65887146 | 0.3758 | 0.1694 | 1.2265  |
| CHB | FOXD4L2 | 65892146 | 1.4019 | 1.1859 | 0.3856  |
| CHB | FOXD4L2 | 65897146 | 1.0739 | 1.1859 | -0.1999 |
| CHB | FOXD4L2 | 65902146 | 0.0672 | 0.3388 | -1.0895 |

## 2\_TajimasD\_data

|     |         |          |        |        |         |
|-----|---------|----------|--------|--------|---------|
| CHB | FOXD4L2 | 65907146 | 0.0194 | 0.1694 | -0.8913 |
| CHB | FOXD4L2 | 65912146 | 0.1668 | 0.1694 | -0.0154 |
| CHB | FOXD4L2 | 65917146 | 1.1277 | 1.3553 | -0.3689 |
| CHB | FOXD4L2 | 65922146 | 0.961  | 1.1859 | -0.4014 |
| CHB | FOXD4L2 | 65927146 | 0      | 0      | 0       |
| CHB | FOXD4L2 | 65932146 | 0      | 0      | 0       |
| CHB | FOXD4L2 | 65937146 | 0      | 0      | 0       |
| CHB | FOXD4L2 | 65942146 | 0      | 0      | 0       |
| CHB | FOXD4L2 | 65947146 | 0      | 0      | 0       |
| CHB | FOXD4L2 | 65952146 | 0      | 0      | 0       |
| CHB | FOXD4L2 | 65957146 | 0      | 0      | 0       |
| CHB | FOXD4L2 | 65962146 | 0      | 0      | 0       |
| CHB | FOXD4L2 | 65967146 | 0.6537 | 1.0165 | -0.722  |
| CHB | FOXD4L2 | 65972146 | 2.1294 | 1.8636 | 0.3391  |
| CHB | FOXD4L2 | 65977146 | 1.4951 | 1.1859 | 0.5519  |
| CHB | FOXD4L2 | 65982146 | 0.0291 | 0.5082 | -1.504  |
| CHB | FOXD4L2 | 65987146 | 0.3128 | 0.3388 | -0.1043 |
| CHB | FOXD4L2 | 65992146 | 0.5285 | 0.6777 | -0.3901 |
| CHB | FOXD4L2 | 65997146 | 0.2825 | 0.6777 | -1.0332 |
| CHB | FOXD4L2 | 66002146 | 1.0436 | 0.5082 | 1.6807  |
| CHB | FOXD4L2 | 66007146 | 1.8066 | 1.5247 | 0.4188  |
| CHB | FOXD4L2 | 66012146 | 1.6644 | 2.5412 | -0.8755 |
| CHB | FOXD4L2 | 66017146 | 1.3326 | 1.8636 | -0.6775 |
| CHB | FOXD4L2 | 66022146 | 0.5357 | 0.6777 | -0.3712 |
| CHB | FOXD4L2 | 66027146 | 0.0474 | 0.1694 | -0.7249 |
| CHB | FOXD4L2 | 66032146 | 0.4866 | 0.8471 | -0.8129 |
| CHB | FOXD4L2 | 66037146 | 0.5351 | 1.3553 | -1.3293 |
| CHB | FOXD4L2 | 66042146 | 0.0583 | 0.6777 | -1.6193 |
| CHB | FOXD4L2 | 66047146 | 0.4959 | 0.6777 | -0.4753 |
| CHB | FOXD4L2 | 66052146 | 0.4862 | 0.5082 | -0.0691 |
| CHB | FOXD4L2 | 66057146 | 0      | 0      | 0       |
| CHB | FOXD4L2 | 66062146 | 0      | 0      | 0       |
| CHB | FOXD4L2 | 66067146 | 0.0388 | 0.3388 | -1.2034 |
| CHB | FOXD4L2 | 66072146 | 0.0388 | 0.3388 | -1.2034 |
| CHB | FOXD4L2 | 66077146 | 0      | 0      | 0       |
| CHB | FOXD4L2 | 66082146 | 0      | 0      | 0       |
| CHB | FOXD4L2 | 66087146 | 0.4323 | 0.1694 | 1.5622  |
| CHB | FOXD4L2 | 66092146 | 0.4323 | 0.1694 | 1.5622  |
| CHB | FOXD4L2 | 66097146 | 0.534  | 0.6777 | -0.3757 |
| CHB | FOXD4L2 | 66102146 | 0.534  | 0.6777 | -0.3757 |
| CHB | FOXD4L2 | 66107146 | 0.0097 | 0.1694 | -0.949  |
| CHB | FOXD4L2 | 66112146 | 0.9564 | 1.3553 | -0.6465 |
| CHB | FOXD4L2 | 66117146 | 1.8431 | 2.3718 | -0.5581 |
| CHB | FOXD4L2 | 66122146 | 0.9159 | 1.5247 | -0.9045 |
| CHB | FOXD4L2 | 66127146 | 0.0485 | 0.6777 | -1.6449 |
| CHB | FOXD4L2 | 66132146 | 0.0291 | 0.3388 | -1.2423 |
| CHB | FOXD4L2 | 66137146 | 0.0554 | 0.1694 | -0.6774 |
| CHB | FOXD4L2 | 66142146 | 0.0554 | 0.1694 | -0.6774 |
| CHB | FOXD4L2 | 66147146 | 0      | 0      | 0       |

## 2\_TajimasD\_data

|     |         |          |        |        |        |
|-----|---------|----------|--------|--------|--------|
| CHB | FOXD4L2 | 66152146 | 0      | 0      | 0      |
| CHB | FOXD4L2 | 66157146 | 0      | 0      | 0      |
| CHB | FOXD4L2 | 66162146 | 0.1769 | 0.1694 | 0.0446 |
| CHB | FOXD4L2 | 66167146 | 0.1769 | 0.1694 | 0.0446 |
| CHB | FOXD4L2 | 66172146 | 0      | 0      | 0      |
| CHB | FOXD4L2 | 66177146 | 0.0097 | 0.1694 | -0.949 |
| CHB | FOXD4L2 | 66182146 | 0.0097 | 0.1694 | -0.949 |
| CHB | FOXD4L2 | 66187146 | 0      | 0      | 0      |
| CHB | FOXD4L2 | 66192146 | 0      | 0      | 0      |
| CHB | FOXD4L2 | 66197146 | 0      | 0      | 0      |
| CHB | FOXD4L2 | 66202146 | 0      | 0      | 0      |
| CHB | FOXD4L2 | 66207146 | 0      | 0      | 0      |
| CHB | FOXD4L2 | 66212146 | 0      | 0      | 0      |
| CHB | FOXD4L2 | 66217146 | 0      | 0      | 0      |
| CHB | FOXD4L2 | 66222146 | 0      | 0      | 0      |
| CHB | FOXD4L2 | 66227146 | 0      | 0      | 0      |
| CHB | FOXD4L2 | 66232146 | 0      | 0      | 0      |
| YRI | FOXD4L2 | 65242146 | 0      | 0      | 0      |
| YRI | FOXD4L2 | 65247146 | 0      | 0      | 0      |
| YRI | FOXD4L2 | 65252146 | 0      | 0      | 0      |
| YRI | FOXD4L2 | 65257146 | 0      | 0      | 0      |
| YRI | FOXD4L2 | 65262146 | 0      | 0      | 0      |
| YRI | FOXD4L2 | 65267146 | 0      | 0      | 0      |
| YRI | FOXD4L2 | 65272146 | 0      | 0      | 0      |
| YRI | FOXD4L2 | 65277146 | 0      | 0      | 0      |
| YRI | FOXD4L2 | 65282146 | 0      | 0      | 0      |
| YRI | FOXD4L2 | 65287146 | 0      | 0      | 0      |
| YRI | FOXD4L2 | 65292146 | 0      | 0      | 0      |
| YRI | FOXD4L2 | 65297146 | 0      | 0      | 0      |
| YRI | FOXD4L2 | 65302146 | 0      | 0      | 0      |
| YRI | FOXD4L2 | 65307146 | 0      | 0      | 0      |
| YRI | FOXD4L2 | 65312146 | 0      | 0      | 0      |
| YRI | FOXD4L2 | 65317146 | 0      | 0      | 0      |
| YRI | FOXD4L2 | 65322146 | 0      | 0      | 0      |
| YRI | FOXD4L2 | 65327146 | 0      | 0      | 0      |
| YRI | FOXD4L2 | 65332146 | 0      | 0      | 0      |
| YRI | FOXD4L2 | 65337146 | 0      | 0      | 0      |
| YRI | FOXD4L2 | 65342146 | 0      | 0      | 0      |
| YRI | FOXD4L2 | 65347146 | 0      | 0      | 0      |
| YRI | FOXD4L2 | 65352146 | 0      | 0      | 0      |
| YRI | FOXD4L2 | 65357146 | 0      | 0      | 0      |
| YRI | FOXD4L2 | 65362146 | 0      | 0      | 0      |
| YRI | FOXD4L2 | 65367146 | 0      | 0      | 0      |
| YRI | FOXD4L2 | 65372146 | 0      | 0      | 0      |
| YRI | FOXD4L2 | 65377146 | 0      | 0      | 0      |
| YRI | FOXD4L2 | 65382146 | 0      | 0      | 0      |
| YRI | FOXD4L2 | 65387146 | 0      | 0      | 0      |
| YRI | FOXD4L2 | 65392146 | 0      | 0      | 0      |
| YRI | FOXD4L2 | 65397146 | 0      | 0      | 0      |

## 2\_TajimasD\_data

|     |         |          |        |         |         |
|-----|---------|----------|--------|---------|---------|
| YRI | FOXD4L2 | 65402146 | 0      | 0       | 0       |
| YRI | FOXD4L2 | 65407146 | 0      | 0       | 0       |
| YRI | FOXD4L2 | 65412146 | 0      | 0       | 0       |
| YRI | FOXD4L2 | 65417146 | 0      | 0       | 0       |
| YRI | FOXD4L2 | 65422146 | 0      | 0       | 0       |
| YRI | FOXD4L2 | 65427146 | 0      | 0       | 0       |
| YRI | FOXD4L2 | 65432146 | 0      | 0       | 0       |
| YRI | FOXD4L2 | 65437146 | 0      | 0       | 0       |
| YRI | FOXD4L2 | 65442146 | 0      | 0       | 0       |
| YRI | FOXD4L2 | 65447146 | 0      | 0       | 0       |
| YRI | FOXD4L2 | 65452146 | 0      | 0       | 0       |
| YRI | FOXD4L2 | 65457146 | 0      | 0       | 0       |
| YRI | FOXD4L2 | 65462146 | 0      | 0       | 0       |
| YRI | FOXD4L2 | 65467146 | 0.0093 | 0.1681  | -0.944  |
| YRI | FOXD4L2 | 65472146 | 0.9335 | 1.5126  | -0.8623 |
| YRI | FOXD4L2 | 65477146 | 1.1468 | 2.0167  | -1.0401 |
| YRI | FOXD4L2 | 65482146 | 0.9536 | 1.3445  | -0.6349 |
| YRI | FOXD4L2 | 65487146 | 0.7497 | 0.8403  | -0.2046 |
| YRI | FOXD4L2 | 65492146 | 0.0185 | 0.1681  | -0.8893 |
| YRI | FOXD4L2 | 65497146 | 0      | 0       | 0       |
| YRI | FOXD4L2 | 65502146 | 0.1224 | 0.1681  | -0.2717 |
| YRI | FOXD4L2 | 65507146 | 0.2029 | 0.3361  | -0.5347 |
| YRI | FOXD4L2 | 65512146 | 0.0806 | 0.1681  | -0.5202 |
| YRI | FOXD4L2 | 65517146 | 0.0185 | 0.1681  | -0.8893 |
| YRI | FOXD4L2 | 65522146 | 0.0185 | 0.1681  | -0.8893 |
| YRI | FOXD4L2 | 65527146 | 0.2715 | 1.6806  | -1.9385 |
| YRI | FOXD4L2 | 65532146 | 0.2715 | 1.6806  | -1.9385 |
| YRI | FOXD4L2 | 65537146 | 0      | 0       | 0       |
| YRI | FOXD4L2 | 65542146 | 0      | 0       | 0       |
| YRI | FOXD4L2 | 65547146 | 0.6899 | 1.3445  | -1.0632 |
| YRI | FOXD4L2 | 65552146 | 1.5276 | 3.0251  | -1.2918 |
| YRI | FOXD4L2 | 65557146 | 1.275  | 3.6974  | -1.7656 |
| YRI | FOXD4L2 | 65562146 | 0.4649 | 2.1848  | -1.9311 |
| YRI | FOXD4L2 | 65567146 | 0.0276 | 0.1681  | -0.8352 |
| YRI | FOXD4L2 | 65572146 | 0.4326 | 0.8403  | -0.9208 |
| YRI | FOXD4L2 | 65577146 | 0.7565 | 1.1764  | -0.751  |
| YRI | FOXD4L2 | 65582146 | 0.3239 | 0.3361  | -0.049  |
| YRI | FOXD4L2 | 65587146 | 0      | 0       | 0       |
| YRI | FOXD4L2 | 65592146 | 1.6402 | 4.8738  | -1.8562 |
| YRI | FOXD4L2 | 65597146 | 4.6935 | 9.2434  | -1.4643 |
| YRI | FOXD4L2 | 65602146 | 3.953  | 7.8989  | -1.468  |
| YRI | FOXD4L2 | 65607146 | 3.125  | 8.067   | -1.8034 |
| YRI | FOXD4L2 | 65612146 | 7.7175 | 12.6047 | -1.1765 |
| YRI | FOXD4L2 | 65617146 | 8.5911 | 13.445  | -1.0993 |
| YRI | FOXD4L2 | 65622146 | 4.8887 | 9.7476  | -1.4885 |
| YRI | FOXD4L2 | 65627146 | 5.5585 | 11.5963 | -1.5723 |
| YRI | FOXD4L2 | 65632146 | 6.3335 | 12.1005 | -1.4428 |
| YRI | FOXD4L2 | 65637146 | 2.8287 | 6.5544  | -1.6426 |
| YRI | FOXD4L2 | 65642146 | 0.3629 | 2.0167  | -1.9774 |

## 2\_TajimasD\_data

|     |         |          |        |        |         |
|-----|---------|----------|--------|--------|---------|
| YRI | FOXD4L2 | 65647146 | 0.1711 | 0.5042 | -1.0468 |
| YRI | FOXD4L2 | 65652146 | 0.072  | 0.1681 | -0.5713 |
| YRI | FOXD4L2 | 65657146 | 0.0093 | 0.1681 | -0.944  |
| YRI | FOXD4L2 | 65662146 | 0.0093 | 0.1681 | -0.944  |
| YRI | FOXD4L2 | 65667146 | 0      | 0      | 0       |
| YRI | FOXD4L2 | 65672146 | 0      | 0      | 0       |
| YRI | FOXD4L2 | 65677146 | 0      | 0      | 0       |
| YRI | FOXD4L2 | 65682146 | 0      | 0      | 0       |
| YRI | FOXD4L2 | 65687146 | 0.0813 | 0.3361 | -1.0229 |
| YRI | FOXD4L2 | 65692146 | 0.0996 | 0.5042 | -1.2715 |
| YRI | FOXD4L2 | 65697146 | 0.0183 | 0.1681 | -0.8905 |
| YRI | FOXD4L2 | 65702146 | 0      | 0      | 0       |
| YRI | FOXD4L2 | 65707146 | 0      | 0      | 0       |
| YRI | FOXD4L2 | 65712146 | 0.1463 | 0.1681 | -0.1296 |
| YRI | FOXD4L2 | 65717146 | 0.1463 | 0.1681 | -0.1296 |
| YRI | FOXD4L2 | 65722146 | 0      | 0      | 0       |
| YRI | FOXD4L2 | 65727146 | 0.0093 | 0.1681 | -0.944  |
| YRI | FOXD4L2 | 65732146 | 0.0093 | 0.1681 | -0.944  |
| YRI | FOXD4L2 | 65737146 | 0.2927 | 0.3361 | -0.1742 |
| YRI | FOXD4L2 | 65742146 | 0.8473 | 0.8403 | 0.0158  |
| YRI | FOXD4L2 | 65747146 | 0.776  | 1.1764 | -0.7161 |
| YRI | FOXD4L2 | 65752146 | 0.3118 | 1.1764 | -1.5464 |
| YRI | FOXD4L2 | 65757146 | 0.5291 | 1.1764 | -1.1577 |
| YRI | FOXD4L2 | 65762146 | 0.7274 | 1.8487 | -1.4342 |
| YRI | FOXD4L2 | 65767146 | 0.6255 | 2.689  | -1.9611 |
| YRI | FOXD4L2 | 65772146 | 0.6872 | 2.3529 | -1.7632 |
| YRI | FOXD4L2 | 65777146 | 0.4059 | 1.3445 | -1.5245 |
| YRI | FOXD4L2 | 65782146 | 0.0648 | 0.6722 | -1.5901 |
| YRI | FOXD4L2 | 65787146 | 0.0093 | 0.1681 | -0.944  |
| YRI | FOXD4L2 | 65792146 | 0      | 0.1681 | -0.9993 |
| YRI | FOXD4L2 | 65797146 | 0.3386 | 0.8403 | -1.1332 |
| YRI | FOXD4L2 | 65802146 | 0.3662 | 0.8403 | -1.0708 |
| YRI | FOXD4L2 | 65807146 | 0.0369 | 0.3361 | -1.2012 |
| YRI | FOXD4L2 | 65812146 | 0.1695 | 0.6722 | -1.316  |
| YRI | FOXD4L2 | 65817146 | 0.1603 | 0.5042 | -1.0808 |
| YRI | FOXD4L2 | 65822146 | 0.4462 | 0.5042 | -0.1823 |
| YRI | FOXD4L2 | 65827146 | 0.4462 | 0.5042 | -0.1823 |
| YRI | FOXD4L2 | 65832146 | 0.0093 | 0.1681 | -0.944  |
| YRI | FOXD4L2 | 65837146 | 0.0458 | 0.3361 | -1.1654 |
| YRI | FOXD4L2 | 65842146 | 0.0458 | 0.3361 | -1.1654 |
| YRI | FOXD4L2 | 65847146 | 0.0093 | 0.1681 | -0.944  |
| YRI | FOXD4L2 | 65852146 | 0      | 0      | 0       |
| YRI | FOXD4L2 | 65857146 | 0.1587 | 0.5042 | -1.0858 |
| YRI | FOXD4L2 | 65862146 | 0.1587 | 0.5042 | -1.0858 |
| YRI | FOXD4L2 | 65867146 | 0.1006 | 0.5042 | -1.2684 |
| YRI | FOXD4L2 | 65872146 | 0.1377 | 1.0084 | -1.7359 |
| YRI | FOXD4L2 | 65877146 | 1.0895 | 1.8487 | -0.9711 |
| YRI | FOXD4L2 | 65882146 | 1.0524 | 1.3445 | -0.4744 |
| YRI | FOXD4L2 | 65887146 | 0.2066 | 0.1681 | 0.2289  |

## 2\_TajimasD\_data

|     |         |          |        |        |         |
|-----|---------|----------|--------|--------|---------|
| YRI | FOXD4L2 | 65892146 | 0.9229 | 1.3445 | -0.6848 |
| YRI | FOXD4L2 | 65897146 | 0.9827 | 1.8487 | -1.1077 |
| YRI | FOXD4L2 | 65902146 | 0.2756 | 0.8403 | -1.2755 |
| YRI | FOXD4L2 | 65907146 | 0.0093 | 0.1681 | -0.944  |
| YRI | FOXD4L2 | 65912146 | 0.0713 | 0.1681 | -0.5754 |
| YRI | FOXD4L2 | 65917146 | 1.7041 | 1.8487 | -0.185  |
| YRI | FOXD4L2 | 65922146 | 1.6328 | 1.6806 | -0.0658 |
| YRI | FOXD4L2 | 65927146 | 0      | 0      | 0       |
| YRI | FOXD4L2 | 65932146 | 0      | 0      | 0       |
| YRI | FOXD4L2 | 65937146 | 0      | 0      | 0       |
| YRI | FOXD4L2 | 65942146 | 0      | 0      | 0       |
| YRI | FOXD4L2 | 65947146 | 0      | 0      | 0       |
| YRI | FOXD4L2 | 65952146 | 0      | 0      | 0       |
| YRI | FOXD4L2 | 65957146 | 0      | 0      | 0       |
| YRI | FOXD4L2 | 65962146 | 0      | 0      | 0       |
| YRI | FOXD4L2 | 65967146 | 0.6725 | 1.0084 | -0.6697 |
| YRI | FOXD4L2 | 65972146 | 1.9839 | 2.0167 | -0.0392 |
| YRI | FOXD4L2 | 65977146 | 1.3756 | 1.5126 | -0.204  |
| YRI | FOXD4L2 | 65982146 | 0.5824 | 1.1764 | -1.0624 |
| YRI | FOXD4L2 | 65987146 | 0.7558 | 1.1764 | -0.7523 |
| YRI | FOXD4L2 | 65992146 | 0.6995 | 2.1848 | -1.6677 |
| YRI | FOXD4L2 | 65997146 | 0.6187 | 2.1848 | -1.7584 |
| YRI | FOXD4L2 | 66002146 | 0.7164 | 1.1764 | -0.8227 |
| YRI | FOXD4L2 | 66007146 | 1.9609 | 3.5293 | -1.1892 |
| YRI | FOXD4L2 | 66012146 | 2.9692 | 4.3696 | -0.8842 |
| YRI | FOXD4L2 | 66017146 | 2.4826 | 2.5209 | -0.0384 |
| YRI | FOXD4L2 | 66022146 | 1.2767 | 1.1764 | 0.1794  |
| YRI | FOXD4L2 | 66027146 | 0.474  | 0.3361 | 0.5536  |
| YRI | FOXD4L2 | 66032146 | 1.5245 | 1.6806 | -0.2147 |
| YRI | FOXD4L2 | 66037146 | 2.1512 | 2.3529 | -0.2135 |
| YRI | FOXD4L2 | 66042146 | 0.8642 | 1.5126 | -0.9655 |
| YRI | FOXD4L2 | 66047146 | 0.804  | 1.5126 | -1.0551 |
| YRI | FOXD4L2 | 66052146 | 0.6785 | 0.8403 | -0.3654 |
| YRI | FOXD4L2 | 66057146 | 0.223  | 0.5042 | -0.8837 |
| YRI | FOXD4L2 | 66062146 | 0.2323 | 0.6722 | -1.1516 |
| YRI | FOXD4L2 | 66067146 | 0.6728 | 0.6722 | 0.0016  |
| YRI | FOXD4L2 | 66072146 | 1.0562 | 0.8403 | 0.4876  |
| YRI | FOXD4L2 | 66077146 | 0.4019 | 0.5042 | -0.3215 |
| YRI | FOXD4L2 | 66082146 | 0.0185 | 0.3361 | -1.275  |
| YRI | FOXD4L2 | 66087146 | 0.4372 | 0.6722 | -0.6152 |
| YRI | FOXD4L2 | 66092146 | 0.4279 | 0.5042 | -0.2398 |
| YRI | FOXD4L2 | 66097146 | 0.8368 | 0.6722 | 0.4309  |
| YRI | FOXD4L2 | 66102146 | 0.8368 | 0.6722 | 0.4309  |
| YRI | FOXD4L2 | 66107146 | 0.0093 | 0.1681 | -0.944  |
| YRI | FOXD4L2 | 66112146 | 0.2929 | 1.0084 | -1.4265 |
| YRI | FOXD4L2 | 66117146 | 1.1321 | 2.1848 | -1.182  |
| YRI | FOXD4L2 | 66122146 | 1.2587 | 1.8487 | -0.7547 |
| YRI | FOXD4L2 | 66127146 | 0.4837 | 1.0084 | -1.0461 |
| YRI | FOXD4L2 | 66132146 | 0.0734 | 0.5042 | -1.3539 |



## 2\_TajimasD\_data

|     |         |          |        |        |         |
|-----|---------|----------|--------|--------|---------|
| YRI | FOXD4L2 | 66137146 | 0.3802 | 0.5042 | -0.3897 |
| YRI | FOXD4L2 | 66142146 | 0.3802 | 0.5042 | -0.3897 |
| YRI | FOXD4L2 | 66147146 | 0.0093 | 0.1681 | -0.944  |
| YRI | FOXD4L2 | 66152146 | 0.0093 | 0.1681 | -0.944  |
| YRI | FOXD4L2 | 66157146 | 0      | 0      | 0       |
| YRI | FOXD4L2 | 66162146 | 0.4565 | 0.1681 | 1.7145  |
| YRI | FOXD4L2 | 66167146 | 0.4565 | 0.1681 | 1.7145  |
| YRI | FOXD4L2 | 66172146 | 0      | 0      | 0       |
| YRI | FOXD4L2 | 66177146 | 0.0273 | 0.1681 | -0.837  |
| YRI | FOXD4L2 | 66182146 | 0.0273 | 0.1681 | -0.837  |
| YRI | FOXD4L2 | 66187146 | 0      | 0      | 0       |
| YRI | FOXD4L2 | 66192146 | 0      | 0      | 0       |
| YRI | FOXD4L2 | 66197146 | 0      | 0      | 0       |
| YRI | FOXD4L2 | 66202146 | 0      | 0      | 0       |
| YRI | FOXD4L2 | 66207146 | 0      | 0      | 0       |
| YRI | FOXD4L2 | 66212146 | 0      | 0      | 0       |
| YRI | FOXD4L2 | 66217146 | 0      | 0      | 0       |
| YRI | FOXD4L2 | 66222146 | 0      | 0      | 0       |
| YRI | FOXD4L2 | 66227146 | 0      | 0      | 0       |
| YRI | FOXD4L2 | 66232146 | 0      | 0      | 0       |
| CEU | FOXD4L2 | 67807867 | 0.0101 | 0.1706 | -0.9534 |
| CEU | FOXD4L2 | 67812867 | 0.0101 | 0.1706 | -0.9534 |
| CEU | FOXD4L2 | 67817867 | 0      | 0      | 0       |
| CEU | FOXD4L2 | 67822867 | 0.3191 | 0.3411 | -0.0882 |
| CEU | FOXD4L2 | 67827867 | 1.9955 | 1.5351 | 0.6827  |
| CEU | FOXD4L2 | 67832867 | 2.1519 | 1.5351 | 0.9146  |
| CEU | FOXD4L2 | 67837867 | 1.638  | 1.5351 | 0.1526  |
| CEU | FOXD4L2 | 67842867 | 1.993  | 1.8762 | 0.1487  |
| CEU | FOXD4L2 | 67847867 | 1.9175 | 1.7056 | 0.2902  |
| CEU | FOXD4L2 | 67852867 | 1.1268 | 1.1939 | -0.1196 |
| CEU | FOXD4L2 | 67857867 | 0.2224 | 0.3411 | -0.4758 |
| CEU | FOXD4L2 | 67862867 | 0.8631 | 0.5117 | 1.1021  |
| CEU | FOXD4L2 | 67867867 | 1.1495 | 0.5117 | 2.0003  |
| CEU | FOXD4L2 | 67872867 | 0.469  | 0.1706 | 1.7726  |
| CEU | FOXD4L2 | 67877867 | 0.0101 | 0.1706 | -0.9534 |
| CEU | FOXD4L2 | 67882867 | 0.1692 | 0.5117 | -1.0742 |
| CEU | FOXD4L2 | 67887867 | 1.1668 | 1.0234 | 0.2849  |
| CEU | FOXD4L2 | 67892867 | 1.3729 | 1.5351 | -0.2405 |
| CEU | FOXD4L2 | 67897867 | 4.7899 | 4.6052 | 0.1121  |
| CEU | FOXD4L2 | 67902867 | 4.9806 | 4.2641 | 0.4651  |
| CEU | FOXD4L2 | 67907867 | 0.5762 | 0.8528 | -0.6229 |
| CEU | FOXD4L2 | 67912867 | 2.1806 | 3.2407 | -0.8693 |
| CEU | FOXD4L2 | 67917867 | 4.2031 | 5.6286 | -0.7251 |
| CEU | FOXD4L2 | 67922867 | 2.161  | 3.0701 | -0.7798 |
| CEU | FOXD4L2 | 67927867 | 0.7236 | 1.1939 | -0.8381 |
| CEU | FOXD4L2 | 67932867 | 2.1713 | 2.729  | -0.5271 |
| CEU | FOXD4L2 | 67937867 | 2.5452 | 2.8996 | -0.3187 |
| CEU | FOXD4L2 | 67942867 | 1.0394 | 1.5351 | -0.735  |
| CEU | FOXD4L2 | 67947867 | 1.7831 | 2.5584 | -0.7723 |

## 2\_TajimasD\_data

|     |         |          |        |        |         |
|-----|---------|----------|--------|--------|---------|
| CEU | FOXD4L2 | 67952867 | 1.7229 | 2.0467 | -0.3853 |
| CEU | FOXD4L2 | 67957867 | 0.0202 | 0.3411 | -1.2864 |
| CEU | FOXD4L2 | 67962867 | 1.0493 | 1.3645 | -0.5099 |
| CEU | FOXD4L2 | 67967867 | 1.4937 | 1.7056 | -0.2902 |
| CEU | FOXD4L2 | 67972867 | 0.4646 | 0.6822 | -0.5682 |
| CEU | FOXD4L2 | 67977867 | 0.1973 | 0.6822 | -1.2662 |
| CEU | FOXD4L2 | 67982867 | 0.9878 | 1.0234 | -0.0707 |
| CEU | FOXD4L2 | 67987867 | 0.7906 | 0.3411 | 1.8019  |
| CEU | FOXD4L2 | 67992867 | 0      | 0      | 0       |
| CEU | FOXD4L2 | 67997867 | 0      | 0      | 0       |
| CEU | FOXD4L2 | 68002867 | 0      | 0      | 0       |
| CEU | FOXD4L2 | 68007867 | 0      | 0      | 0       |
| CEU | FOXD4L2 | 68012867 | 0      | 0      | 0       |
| CEU | FOXD4L2 | 68017867 | 0      | 0      | 0       |
| CEU | FOXD4L2 | 68022867 | 0      | 0      | 0       |
| CEU | FOXD4L2 | 68027867 | 0      | 0      | 0       |
| CEU | FOXD4L2 | 68032867 | 0      | 0      | 0       |
| CEU | FOXD4L2 | 68037867 | 0      | 0      | 0       |
| CEU | FOXD4L2 | 68042867 | 0      | 0      | 0       |
| CEU | FOXD4L2 | 68047867 | 0      | 0      | 0       |
| CEU | FOXD4L2 | 68052867 | 0      | 0      | 0       |
| CEU | FOXD4L2 | 68057867 | 0      | 0      | 0       |
| CEU | FOXD4L2 | 68062867 | 0      | 0      | 0       |
| CEU | FOXD4L2 | 68067867 | 0      | 0      | 0       |
| CEU | FOXD4L2 | 68072867 | 0      | 0      | 0       |
| CEU | FOXD4L2 | 68077867 | 0      | 0      | 0       |
| CEU | FOXD4L2 | 68082867 | 0      | 0      | 0       |
| CEU | FOXD4L2 | 68087867 | 0      | 0      | 0       |
| CEU | FOXD4L2 | 68092867 | 0      | 0      | 0       |
| CEU | FOXD4L2 | 68097867 | 0      | 0      | 0       |
| CEU | FOXD4L2 | 68102867 | 0      | 0      | 0       |
| CEU | FOXD4L2 | 68107867 | 0      | 0      | 0       |
| CEU | FOXD4L2 | 68112867 | 0      | 0      | 0       |
| CEU | FOXD4L2 | 68117867 | 0      | 0      | 0       |
| CEU | FOXD4L2 | 68122867 | 0      | 0      | 0       |
| CEU | FOXD4L2 | 68127867 | 0      | 0      | 0       |
| CEU | FOXD4L2 | 68132867 | 0      | 0      | 0       |
| CEU | FOXD4L2 | 68137867 | 1.1185 | 1.0234 | 0.189   |
| CEU | FOXD4L2 | 68142867 | 2.7943 | 3.4112 | -0.4845 |
| CEU | FOXD4L2 | 68147867 | 3.0843 | 5.1169 | -1.1251 |
| CEU | FOXD4L2 | 68152867 | 3.3342 | 6.8225 | -1.4926 |
| CEU | FOXD4L2 | 68157867 | 3.1614 | 6.1402 | -1.4017 |
| CEU | FOXD4L2 | 68162867 | 2.7988 | 4.4346 | -1.0264 |
| CEU | FOXD4L2 | 68167867 | 3.9674 | 6.1402 | -1.0225 |
| CEU | FOXD4L2 | 68172867 | 4.7199 | 7.5047 | -1.0926 |
| CEU | FOXD4L2 | 68177867 | 4.7495 | 8.5281 | -1.3184 |
| CEU | FOXD4L2 | 68182867 | 4.161  | 7.6753 | -1.3508 |
| CEU | FOXD4L2 | 68187867 | 3.1499 | 5.458  | -1.2066 |
| CEU | FOXD4L2 | 68192867 | 3.2509 | 5.1169 | -1.0329 |

## 2\_TajimasD\_data

|     |         |          |         |         |         |
|-----|---------|----------|---------|---------|---------|
| CEU | FOXD4L2 | 68197867 | 3.4896  | 5.7991  | -1.1439 |
| CEU | FOXD4L2 | 68202867 | 5.4469  | 9.0398  | -1.1879 |
| CEU | FOXD4L2 | 68207867 | 5.7939  | 9.7221  | -1.2139 |
| CEU | FOXD4L2 | 68212867 | 3.9099  | 6.3108  | -1.1023 |
| CEU | FOXD4L2 | 68217867 | 4.7953  | 6.1402  | -0.6329 |
| CEU | FOXD4L2 | 68222867 | 4.9105  | 8.8692  | -1.3321 |
| CEU | FOXD4L2 | 68227867 | 3.1084  | 6.9931  | -1.6254 |
| CEU | FOXD4L2 | 68232867 | 2.1319  | 3.9229  | -1.2492 |
| CEU | FOXD4L2 | 68237867 | 3.906   | 4.9463  | -0.5933 |
| CEU | FOXD4L2 | 68242867 | 3.8794  | 4.4346  | -0.3484 |
| CEU | FOXD4L2 | 68247867 | 3.323   | 3.9229  | -0.4184 |
| CEU | FOXD4L2 | 68252867 | 5.0113  | 5.2874  | -0.1485 |
| CEU | FOXD4L2 | 68257867 | 3.5508  | 4.7757  | -0.7204 |
| CEU | FOXD4L2 | 68262867 | 1.2674  | 3.9229  | -1.8521 |
| CEU | FOXD4L2 | 68267867 | 1.2727  | 3.9229  | -1.8484 |
| CEU | FOXD4L2 | 68272867 | 2.2948  | 4.7757  | -1.4591 |
| CEU | FOXD4L2 | 68277867 | 3.4267  | 6.9931  | -1.4922 |
| CEU | FOXD4L2 | 68282867 | 3.9716  | 7.1636  | -1.3066 |
| CEU | FOXD4L2 | 68287867 | 4.7897  | 5.9697  | -0.5695 |
| CEU | FOXD4L2 | 68292867 | 4.571   | 5.458   | -0.4637 |
| CEU | FOXD4L2 | 68297867 | 3.9219  | 7.3342  | -1.3672 |
| CEU | FOXD4L2 | 68302867 | 4.1723  | 8.0164  | -1.4198 |
| CEU | FOXD4L2 | 68307867 | 2.8161  | 4.6052  | -1.0862 |
| CEU | FOXD4L2 | 68312867 | 1.9367  | 4.0935  | -1.4503 |
| CEU | FOXD4L2 | 68317867 | 9.4158  | 9.7221  | -0.0947 |
| CEU | FOXD4L2 | 68322867 | 11.0109 | 12.1099 | -0.2765 |
| CEU | FOXD4L2 | 68327867 | 5.2319  | 7.1636  | -0.7907 |
| CEU | FOXD4L2 | 68332867 | 5.356   | 6.9931  | -0.685  |
| CEU | FOXD4L2 | 68337867 | 4.5376  | 8.0164  | -1.2849 |
| CEU | FOXD4L2 | 68342867 | 3.9959  | 8.187   | -1.5183 |
| CEU | FOXD4L2 | 68347867 | 4.7972  | 10.2337 | -1.6016 |
| CEU | FOXD4L2 | 68352867 | 3.5417  | 8.6987  | -1.7668 |
| CEU | FOXD4L2 | 68357867 | 8.2245  | 8.5281  | -0.1059 |
| CEU | FOXD4L2 | 68362867 | 10.8301 | 8.187   | 0.9575  |
| CEU | FOXD4L2 | 68367867 | 6.2935  | 6.6519  | -0.1569 |
| CEU | FOXD4L2 | 68372867 | 5.0977  | 6.8225  | -0.738  |
| CEU | FOXD4L2 | 68377867 | 4.4261  | 5.7991  | -0.68   |
| CEU | FOXD4L2 | 68382867 | 14.8365 | 8.0164  | 2.519   |
| CEU | FOXD4L2 | 68387867 | 22.1325 | 10.916  | 3.1109  |
| CEU | FOXD4L2 | 68392867 | 14.2397 | 9.3809  | 1.5522  |
| CEU | FOXD4L2 | 68397867 | 6.6706  | 7.8459  | -0.4428 |
| CEU | FOXD4L2 | 68402867 | 3.4137  | 6.8225  | -1.4586 |
| CEU | FOXD4L2 | 68407867 | 8.3814  | 8.187   | 0.0704  |
| CEU | FOXD4L2 | 68412867 | 26.7946 | 14.1567 | 2.7425  |
| CEU | FOXD4L2 | 68417867 | 32.8922 | 14.6684 | 3.8234  |
| CEU | FOXD4L2 | 68422867 | 16.7311 | 9.0398  | 2.5429  |
| CEU | FOXD4L2 | 68427867 | 6.6854  | 6.4814  | 0.0914  |
| CEU | FOXD4L2 | 68432867 | 6.032   | 7.6753  | -0.6316 |
| CEU | FOXD4L2 | 68437867 | 7.9239  | 11.7688 | -0.9937 |

## 2\_TajimasD\_data

|     |         |          |        |         |         |
|-----|---------|----------|--------|---------|---------|
| CEU | FOXD4L2 | 68442867 | 7.6656 | 11.9394 | -1.0896 |
| CEU | FOXD4L2 | 68447867 | 6.1251 | 9.7221  | -1.1116 |
| CEU | FOXD4L2 | 68452867 | 6.0697 | 10.0632 | -1.1951 |
| CEU | FOXD4L2 | 68457867 | 4.1789 | 9.7221  | -1.713  |
| CEU | FOXD4L2 | 68462867 | 2.8549 | 9.2104  | -2.0652 |
| CEU | FOXD4L2 | 68467867 | 4.6634 | 9.0398  | -1.4469 |
| CEU | FOXD4L2 | 68472867 | 5.6961 | 7.5047  | -0.7096 |
| CEU | FOXD4L2 | 68477867 | 8.1971 | 7.5047  | 0.2717  |
| CEU | FOXD4L2 | 68482867 | 9.4094 | 7.8459  | 0.589   |
| CEU | FOXD4L2 | 68487867 | 7.2894 | 8.3576  | -0.3797 |
| CEU | FOXD4L2 | 68492867 | 5.3088 | 9.0398  | -1.2336 |
| CEU | FOXD4L2 | 68497867 | 4.093  | 9.3809  | -1.6893 |
| CEU | FOXD4L2 | 68502867 | 3.9839 | 10.7454 | -1.9032 |
| CEU | FOXD4L2 | 68507867 | 4.2564 | 11.0866 | -1.867  |
| CEU | FOXD4L2 | 68512867 | 3.0942 | 6.6519  | -1.5576 |
| CEU | FOXD4L2 | 68517867 | 0.509  | 0.8528  | -0.7742 |
| CEU | FOXD4L2 | 68522867 | 0      | 0       | 0       |
| CEU | FOXD4L2 | 68527867 | 0      | 0       | 0       |
| CEU | FOXD4L2 | 68532867 | 0      | 0       | 0       |
| CEU | FOXD4L2 | 68537867 | 0      | 0       | 0       |
| CEU | FOXD4L2 | 68542867 | 0      | 0       | 0       |
| CEU | FOXD4L2 | 68547867 | 0      | 0       | 0       |
| CEU | FOXD4L2 | 68552867 | 0      | 0       | 0       |
| CEU | FOXD4L2 | 68557867 | 0      | 0       | 0       |
| CEU | FOXD4L2 | 68562867 | 0      | 0       | 0       |
| CEU | FOXD4L2 | 68567867 | 0      | 0       | 0       |
| CEU | FOXD4L2 | 68572867 | 0      | 0       | 0       |
| CEU | FOXD4L2 | 68577867 | 0      | 0       | 0       |
| CEU | FOXD4L2 | 68582867 | 0      | 0       | 0       |
| CEU | FOXD4L2 | 68587867 | 0      | 0       | 0       |
| CEU | FOXD4L2 | 68592867 | 0      | 0       | 0       |
| CEU | FOXD4L2 | 68597867 | 0      | 0       | 0       |
| CEU | FOXD4L2 | 68602867 | 0      | 0       | 0       |
| CEU | FOXD4L2 | 68607867 | 0      | 0       | 0       |
| CEU | FOXD4L2 | 68612867 | 0      | 0       | 0       |
| CEU | FOXD4L2 | 68617867 | 0      | 0       | 0       |
| CEU | FOXD4L2 | 68622867 | 0      | 0       | 0       |
| CEU | FOXD4L2 | 68627867 | 0      | 0       | 0       |
| CEU | FOXD4L2 | 68632867 | 0      | 0       | 0       |
| CEU | FOXD4L2 | 68637867 | 0      | 0       | 0       |
| CEU | FOXD4L2 | 68642867 | 0      | 0       | 0       |
| CEU | FOXD4L2 | 68647867 | 0      | 0       | 0       |
| CEU | FOXD4L2 | 68652867 | 0      | 0       | 0       |
| CEU | FOXD4L2 | 68657867 | 0      | 0       | 0       |
| CEU | FOXD4L2 | 68662867 | 0.2744 | 1.3645  | -1.7635 |
| CEU | FOXD4L2 | 68667867 | 2.3564 | 4.7757  | -1.4229 |
| CEU | FOXD4L2 | 68672867 | 3.1787 | 4.9463  | -1.0081 |
| CEU | FOXD4L2 | 68677867 | 1.1371 | 2.2173  | -1.2068 |
| CEU | FOXD4L2 | 68682867 | 0.101  | 1.5351  | -2.1265 |

## 2\_TajimasD\_data

|     |         |          |        |        |         |
|-----|---------|----------|--------|--------|---------|
| CEU | FOXD4L2 | 68687867 | 2.4069 | 3.0701 | -0.5689 |
| CEU | FOXD4L2 | 68692867 | 2.9755 | 3.5818 | -0.457  |
| CEU | FOXD4L2 | 68697867 | 1.811  | 2.2173 | -0.4539 |
| CEU | FOXD4L2 | 68702867 | 1.369  | 1.3645 | 0.0073  |
| CEU | FOXD4L2 | 68707867 | 0.9052 | 1.8762 | -1.2362 |
| CEU | FOXD4L2 | 68712867 | 0.7483 | 1.8762 | -1.436  |
| CEU | FOXD4L2 | 68717867 | 0.3488 | 1.5351 | -1.7591 |
| CEU | FOXD4L2 | 68722867 | 0.4651 | 1.8762 | -1.7966 |
| CEU | FOXD4L2 | 68727867 | 0.6273 | 1.7056 | -1.4769 |
| CEU | FOXD4L2 | 68732867 | 2.5459 | 3.9229 | -0.9604 |
| CEU | FOXD4L2 | 68737867 | 5.3427 | 6.1402 | -0.3753 |
| CEU | FOXD4L2 | 68742867 | 4.438  | 4.7757 | -0.1986 |
| CEU | FOXD4L2 | 68747867 | 1.8973 | 4.2641 | -1.5364 |
| CEU | FOXD4L2 | 68752867 | 2.8891 | 5.458  | -1.343  |
| CEU | FOXD4L2 | 68757867 | 3.2086 | 4.7757 | -0.9217 |
| CEU | FOXD4L2 | 68762867 | 1.3867 | 2.8996 | -1.3606 |
| CEU | FOXD4L2 | 68767867 | 1.0952 | 3.2407 | -1.7593 |
| CEU | FOXD4L2 | 68772867 | 1.7405 | 3.5818 | -1.3878 |
| CEU | FOXD4L2 | 68777867 | 2.2146 | 4.2641 | -1.3304 |
| CEU | FOXD4L2 | 68782867 | 2.6679 | 5.458  | -1.4586 |
| CEU | FOXD4L2 | 68787867 | 3.4343 | 6.1402 | -1.2733 |
| CEU | FOXD4L2 | 68792867 | 3.2061 | 6.1402 | -1.3807 |
| CEU | FOXD4L2 | 68797867 | 2.4166 | 4.6052 | -1.3288 |
| CHB | FOXD4L2 | 67807867 | 0      | 0      | 0       |
| CHB | FOXD4L2 | 67812867 | 0      | 0      | 0       |
| CHB | FOXD4L2 | 67817867 | 0.0097 | 0.1694 | -0.949  |
| CHB | FOXD4L2 | 67822867 | 0.6396 | 0.6777 | -0.0996 |
| CHB | FOXD4L2 | 67827867 | 2.3377 | 1.5247 | 1.2078  |
| CHB | FOXD4L2 | 67832867 | 1.9983 | 1.1859 | 1.4501  |
| CHB | FOXD4L2 | 67837867 | 1.1133 | 1.1859 | -0.1296 |
| CHB | FOXD4L2 | 67842867 | 1.7898 | 1.8636 | -0.0942 |
| CHB | FOXD4L2 | 67847867 | 1.7822 | 1.6942 | 0.1208  |
| CHB | FOXD4L2 | 67852867 | 0.8152 | 0.8471 | -0.0719 |
| CHB | FOXD4L2 | 67857867 | 0.1447 | 0.1694 | -0.1468 |
| CHB | FOXD4L2 | 67862867 | 0.6448 | 0.5082 | 0.4288  |
| CHB | FOXD4L2 | 67867867 | 0.9564 | 0.5082 | 1.407   |
| CHB | FOXD4L2 | 67872867 | 0.4563 | 0.1694 | 1.7048  |
| CHB | FOXD4L2 | 67877867 | 0.0097 | 0.1694 | -0.949  |
| CHB | FOXD4L2 | 67882867 | 0.2842 | 0.5082 | -0.7032 |
| CHB | FOXD4L2 | 67887867 | 1.3219 | 1.5247 | -0.3013 |
| CHB | FOXD4L2 | 67892867 | 1.2602 | 2.033  | -0.9216 |
| CHB | FOXD4L2 | 67897867 | 3.7575 | 3.3883 | 0.2908  |
| CHB | FOXD4L2 | 67902867 | 4.052  | 2.8801 | 1.0566  |
| CHB | FOXD4L2 | 67907867 | 0.5751 | 1.0165 | -0.8784 |
| CHB | FOXD4L2 | 67912867 | 1.9098 | 2.033  | -0.1469 |
| CHB | FOXD4L2 | 67917867 | 3.2941 | 4.066  | -0.5205 |
| CHB | FOXD4L2 | 67922867 | 1.5005 | 3.0495 | -1.3321 |
| CHB | FOXD4L2 | 67927867 | 0.6674 | 1.5247 | -1.2736 |
| CHB | FOXD4L2 | 67932867 | 2.155  | 2.8801 | -0.6538 |

## 2\_TajimasD\_data

|     |         |          |        |        |         |
|-----|---------|----------|--------|--------|---------|
| CHB | FOXD4L2 | 67937867 | 2.2821 | 2.7106 | -0.406  |
| CHB | FOXD4L2 | 67942867 | 0.8329 | 1.5247 | -1.0278 |
| CHB | FOXD4L2 | 67947867 | 0.8816 | 2.5412 | -1.6572 |
| CHB | FOXD4L2 | 67952867 | 0.795  | 2.033  | -1.4763 |
| CHB | FOXD4L2 | 67957867 | 0      | 0      | 0       |
| CHB | FOXD4L2 | 67962867 | 1.5069 | 1.8636 | -0.4551 |
| CHB | FOXD4L2 | 67967867 | 1.9735 | 2.5412 | -0.5669 |
| CHB | FOXD4L2 | 67972867 | 0.4666 | 0.6777 | -0.5519 |
| CHB | FOXD4L2 | 67977867 | 0.0097 | 0.1694 | -0.949  |
| CHB | FOXD4L2 | 67982867 | 1.2073 | 1.0165 | 0.3797  |
| CHB | FOXD4L2 | 67987867 | 1.1976 | 0.8471 | 0.7904  |
| CHB | FOXD4L2 | 67992867 | 0      | 0      | 0       |
| CHB | FOXD4L2 | 67997867 | 0      | 0      | 0       |
| CHB | FOXD4L2 | 68002867 | 0      | 0      | 0       |
| CHB | FOXD4L2 | 68007867 | 0      | 0      | 0       |
| CHB | FOXD4L2 | 68012867 | 0      | 0      | 0       |
| CHB | FOXD4L2 | 68017867 | 0      | 0      | 0       |
| CHB | FOXD4L2 | 68022867 | 0      | 0      | 0       |
| CHB | FOXD4L2 | 68027867 | 0      | 0      | 0       |
| CHB | FOXD4L2 | 68032867 | 0      | 0      | 0       |
| CHB | FOXD4L2 | 68037867 | 0      | 0      | 0       |
| CHB | FOXD4L2 | 68042867 | 0      | 0      | 0       |
| CHB | FOXD4L2 | 68047867 | 0      | 0      | 0       |
| CHB | FOXD4L2 | 68052867 | 0      | 0      | 0       |
| CHB | FOXD4L2 | 68057867 | 0      | 0      | 0       |
| CHB | FOXD4L2 | 68062867 | 0      | 0      | 0       |
| CHB | FOXD4L2 | 68067867 | 0      | 0      | 0       |
| CHB | FOXD4L2 | 68072867 | 0      | 0      | 0       |
| CHB | FOXD4L2 | 68077867 | 0      | 0      | 0       |
| CHB | FOXD4L2 | 68082867 | 0      | 0      | 0       |
| CHB | FOXD4L2 | 68087867 | 0      | 0      | 0       |
| CHB | FOXD4L2 | 68092867 | 0      | 0      | 0       |
| CHB | FOXD4L2 | 68097867 | 0      | 0      | 0       |
| CHB | FOXD4L2 | 68102867 | 0      | 0      | 0       |
| CHB | FOXD4L2 | 68107867 | 0      | 0      | 0       |
| CHB | FOXD4L2 | 68112867 | 0      | 0      | 0       |
| CHB | FOXD4L2 | 68117867 | 0      | 0      | 0       |
| CHB | FOXD4L2 | 68122867 | 0      | 0      | 0       |
| CHB | FOXD4L2 | 68127867 | 0      | 0      | 0       |
| CHB | FOXD4L2 | 68132867 | 0      | 0      | 0       |
| CHB | FOXD4L2 | 68137867 | 2.1289 | 1.8636 | 0.3385  |
| CHB | FOXD4L2 | 68142867 | 5.4158 | 4.7436 | 0.3965  |
| CHB | FOXD4L2 | 68147867 | 6.6876 | 6.0989 | 0.2779  |
| CHB | FOXD4L2 | 68152867 | 7.9296 | 6.6072 | 0.5808  |
| CHB | FOXD4L2 | 68157867 | 6.5387 | 6.0989 | 0.2076  |
| CHB | FOXD4L2 | 68162867 | 4.4887 | 4.7436 | -0.1504 |
| CHB | FOXD4L2 | 68167867 | 6.3507 | 5.5907 | 0.3878  |
| CHB | FOXD4L2 | 68172867 | 7.9644 | 7.1154 | 0.3487  |
| CHB | FOXD4L2 | 68177867 | 9.6242 | 7.6237 | 0.7714  |

## 2\_TajimasD\_data

|     |         |          |         |         |         |
|-----|---------|----------|---------|---------|---------|
| CHB | FOXD4L2 | 68182867 | 9.9101  | 8.3013  | 0.5738  |
| CHB | FOXD4L2 | 68187867 | 7.067   | 7.2848  | -0.0875 |
| CHB | FOXD4L2 | 68192867 | 6.5075  | 6.2684  | 0.1101  |
| CHB | FOXD4L2 | 68197867 | 9.6368  | 7.9625  | 0.6204  |
| CHB | FOXD4L2 | 68202867 | 11.9155 | 9.3178  | 0.8327  |
| CHB | FOXD4L2 | 68207867 | 8.9971  | 7.6237  | 0.5296  |
| CHB | FOXD4L2 | 68212867 | 6.4278  | 5.7601  | 0.3317  |
| CHB | FOXD4L2 | 68217867 | 7.7179  | 5.9295  | 0.8658  |
| CHB | FOXD4L2 | 68222867 | 8.4831  | 8.4708  | 0.0043  |
| CHB | FOXD4L2 | 68227867 | 6.9236  | 8.3013  | -0.4914 |
| CHB | FOXD4L2 | 68232867 | 4.4517  | 5.5907  | -0.5811 |
| CHB | FOXD4L2 | 68237867 | 4.9785  | 5.4213  | -0.2322 |
| CHB | FOXD4L2 | 68242867 | 5.3031  | 5.4213  | -0.062  |
| CHB | FOXD4L2 | 68247867 | 5.0177  | 4.913   | 0.0599  |
| CHB | FOXD4L2 | 68252867 | 7.6651  | 5.4213  | 1.1766  |
| CHB | FOXD4L2 | 68257867 | 5.8654  | 4.066   | 1.2134  |
| CHB | FOXD4L2 | 68262867 | 1.7868  | 3.0495  | -1.0859 |
| CHB | FOXD4L2 | 68267867 | 1.9315  | 5.2519  | -1.7908 |
| CHB | FOXD4L2 | 68272867 | 3.6254  | 6.4378  | -1.2645 |
| CHB | FOXD4L2 | 68277867 | 6.1658  | 6.946   | -0.3275 |
| CHB | FOXD4L2 | 68282867 | 7.1266  | 6.2684  | 0.3953  |
| CHB | FOXD4L2 | 68287867 | 7.2383  | 5.5907  | 0.8406  |
| CHB | FOXD4L2 | 68292867 | 7.2511  | 6.0989  | 0.5439  |
| CHB | FOXD4L2 | 68297867 | 7.5665  | 7.9625  | -0.1467 |
| CHB | FOXD4L2 | 68302867 | 7.3992  | 8.8096  | -0.4762 |
| CHB | FOXD4L2 | 68307867 | 4.1453  | 6.2684  | -0.9778 |
| CHB | FOXD4L2 | 68312867 | 4.2692  | 6.6072  | -1.0269 |
| CHB | FOXD4L2 | 68317867 | 15.09   | 11.6896 | 0.8818  |
| CHB | FOXD4L2 | 68322867 | 16.6368 | 13.5532 | 0.6954  |
| CHB | FOXD4L2 | 68327867 | 6.8469  | 9.8261  | -0.909  |
| CHB | FOXD4L2 | 68332867 | 6.8239  | 9.9955  | -0.9524 |
| CHB | FOXD4L2 | 68337867 | 7.2989  | 8.4708  | -0.4102 |
| CHB | FOXD4L2 | 68342867 | 7.4097  | 6.2684  | 0.5256  |
| CHB | FOXD4L2 | 68347867 | 11.502  | 9.6567  | 0.5722  |
| CHB | FOXD4L2 | 68352867 | 8.8957  | 8.8096  | 0.0291  |
| CHB | FOXD4L2 | 68357867 | 9.9417  | 7.6237  | 0.8939  |
| CHB | FOXD4L2 | 68362867 | 12.0023 | 6.0989  | 2.7867  |
| CHB | FOXD4L2 | 68367867 | 8.1502  | 4.4048  | 2.3568  |
| CHB | FOXD4L2 | 68372867 | 7.7955  | 5.2519  | 1.3718  |
| CHB | FOXD4L2 | 68377867 | 6.7664  | 5.9295  | 0.4052  |
| CHB | FOXD4L2 | 68382867 | 15.7221 | 10.6731 | 1.426   |
| CHB | FOXD4L2 | 68387867 | 23.028  | 12.5367 | 2.5471  |
| CHB | FOXD4L2 | 68392867 | 14.4276 | 8.3013  | 2.1849  |
| CHB | FOXD4L2 | 68397867 | 6.7885  | 7.9625  | -0.435  |
| CHB | FOXD4L2 | 68402867 | 5.8026  | 8.8096  | -1.0152 |
| CHB | FOXD4L2 | 68407867 | 11.636  | 10.1649 | 0.4349  |
| CHB | FOXD4L2 | 68412867 | 27.5314 | 15.0779 | 2.5379  |
| CHB | FOXD4L2 | 68417867 | 32.4346 | 15.2474 | 3.4655  |
| CHB | FOXD4L2 | 68422867 | 18.1413 | 9.4872  | 2.728   |

## 2\_TajimasD\_data

|     |         |          |         |         |         |
|-----|---------|----------|---------|---------|---------|
| CHB | FOXD4L2 | 68427867 | 8.5035  | 6.6072  | 0.8329  |
| CHB | FOXD4L2 | 68432867 | 9.6377  | 9.4872  | 0.0474  |
| CHB | FOXD4L2 | 68437867 | 15.2656 | 13.7226 | 0.3439  |
| CHB | FOXD4L2 | 68442867 | 14.5639 | 13.045  | 0.3552  |
| CHB | FOXD4L2 | 68447867 | 10.114  | 9.6567  | 0.1418  |
| CHB | FOXD4L2 | 68452867 | 8.7379  | 9.4872  | -0.2362 |
| CHB | FOXD4L2 | 68457867 | 7.2404  | 9.8261  | -0.7889 |
| CHB | FOXD4L2 | 68462867 | 7.0836  | 7.6237  | -0.2083 |
| CHB | FOXD4L2 | 68467867 | 8.3     | 6.946   | 0.5684  |
| CHB | FOXD4L2 | 68472867 | 9.3547  | 8.1319  | 0.4445  |
| CHB | FOXD4L2 | 68477867 | 11.2037 | 8.4708  | 0.9567  |
| CHB | FOXD4L2 | 68482867 | 10.8586 | 9.4872  | 0.4323  |
| CHB | FOXD4L2 | 68487867 | 8.6493  | 11.012  | -0.6481 |
| CHB | FOXD4L2 | 68492867 | 8.7588  | 10.5037 | -0.5003 |
| CHB | FOXD4L2 | 68497867 | 8.5903  | 9.9955  | -0.422  |
| CHB | FOXD4L2 | 68502867 | 8.4413  | 9.6567  | -0.3769 |
| CHB | FOXD4L2 | 68507867 | 10.9943 | 11.1814 | -0.0506 |
| CHB | FOXD4L2 | 68512867 | 7.4483  | 8.3013  | -0.3042 |
| CHB | FOXD4L2 | 68517867 | 0.6025  | 1.1859  | -1.0414 |
| CHB | FOXD4L2 | 68522867 | 0       | 0       | 0       |
| CHB | FOXD4L2 | 68527867 | 0       | 0       | 0       |
| CHB | FOXD4L2 | 68532867 | 0       | 0       | 0       |
| CHB | FOXD4L2 | 68537867 | 0       | 0       | 0       |
| CHB | FOXD4L2 | 68542867 | 0       | 0       | 0       |
| CHB | FOXD4L2 | 68547867 | 0       | 0       | 0       |
| CHB | FOXD4L2 | 68552867 | 0       | 0       | 0       |
| CHB | FOXD4L2 | 68557867 | 0       | 0       | 0       |
| CHB | FOXD4L2 | 68562867 | 0       | 0       | 0       |
| CHB | FOXD4L2 | 68567867 | 0       | 0       | 0       |
| CHB | FOXD4L2 | 68572867 | 0       | 0       | 0       |
| CHB | FOXD4L2 | 68577867 | 0       | 0       | 0       |
| CHB | FOXD4L2 | 68582867 | 0       | 0       | 0       |
| CHB | FOXD4L2 | 68587867 | 0       | 0       | 0       |
| CHB | FOXD4L2 | 68592867 | 0       | 0       | 0       |
| CHB | FOXD4L2 | 68597867 | 0       | 0       | 0       |
| CHB | FOXD4L2 | 68602867 | 0       | 0       | 0       |
| CHB | FOXD4L2 | 68607867 | 0       | 0       | 0       |
| CHB | FOXD4L2 | 68612867 | 0       | 0       | 0       |
| CHB | FOXD4L2 | 68617867 | 0       | 0       | 0       |
| CHB | FOXD4L2 | 68622867 | 0       | 0       | 0       |
| CHB | FOXD4L2 | 68627867 | 0       | 0       | 0       |
| CHB | FOXD4L2 | 68632867 | 0       | 0       | 0       |
| CHB | FOXD4L2 | 68637867 | 0       | 0       | 0       |
| CHB | FOXD4L2 | 68642867 | 0       | 0       | 0       |
| CHB | FOXD4L2 | 68647867 | 0       | 0       | 0       |
| CHB | FOXD4L2 | 68652867 | 0       | 0       | 0       |
| CHB | FOXD4L2 | 68657867 | 0       | 0       | 0       |
| CHB | FOXD4L2 | 68662867 | 0.174   | 1.5247  | -2.0067 |
| CHB | FOXD4L2 | 68667867 | 1.3954  | 4.066   | -1.8009 |



## 2\_TajimasD\_data

|     |         |          |        |        |         |
|-----|---------|----------|--------|--------|---------|
| CHB | FOXD4L2 | 68672867 | 2.0999 | 3.5577 | -1.1017 |
| CHB | FOXD4L2 | 68677867 | 0.9366 | 1.8636 | -1.1827 |
| CHB | FOXD4L2 | 68682867 | 0.4161 | 2.2024 | -2.0002 |
| CHB | FOXD4L2 | 68687867 | 2.505  | 3.2189 | -0.5869 |
| CHB | FOXD4L2 | 68692867 | 2.7226 | 3.0495 | -0.2811 |
| CHB | FOXD4L2 | 68697867 | 1.5964 | 2.2024 | -0.6786 |
| CHB | FOXD4L2 | 68702867 | 1.2732 | 2.033  | -0.9061 |
| CHB | FOXD4L2 | 68707867 | 1.0482 | 2.3718 | -1.3972 |
| CHB | FOXD4L2 | 68712867 | 0.8249 | 1.8636 | -1.3252 |
| CHB | FOXD4L2 | 68717867 | 0.068  | 1.1859 | -1.9954 |
| CHB | FOXD4L2 | 68722867 | 0.1426 | 1.3553 | -1.9654 |
| CHB | FOXD4L2 | 68727867 | 0.5553 | 1.6942 | -1.563  |
| CHB | FOXD4L2 | 68732867 | 2.047  | 4.5742 | -1.5389 |
| CHB | FOXD4L2 | 68737867 | 3.9732 | 7.6237 | -1.4077 |
| CHB | FOXD4L2 | 68742867 | 3.3558 | 5.2519 | -1.0226 |
| CHB | FOXD4L2 | 68747867 | 1.5277 | 4.2354 | -1.7627 |
| CHB | FOXD4L2 | 68752867 | 2.6351 | 6.2684 | -1.6734 |
| CHB | FOXD4L2 | 68757867 | 3.8578 | 4.7436 | -0.5225 |
| CHB | FOXD4L2 | 68762867 | 2.2665 | 3.0495 | -0.6734 |
| CHB | FOXD4L2 | 68767867 | 1.1294 | 3.7271 | -1.8872 |
| CHB | FOXD4L2 | 68772867 | 1.4438 | 4.5742 | -1.9062 |
| CHB | FOXD4L2 | 68777867 | 2.0532 | 5.5907 | -1.8049 |
| CHB | FOXD4L2 | 68782867 | 2.2732 | 5.5907 | -1.6927 |
| CHB | FOXD4L2 | 68787867 | 2.4698 | 5.5907 | -1.5924 |
| CHB | FOXD4L2 | 68792867 | 2.4243 | 5.9295 | -1.6969 |
| CHB | FOXD4L2 | 68797867 | 2.2587 | 5.2519 | -1.6143 |
| YRI | FOXD4L2 | 67807867 | 0.1832 | 0.5042 | -1.0088 |
| YRI | FOXD4L2 | 67812867 | 0.0864 | 0.1681 | -0.4857 |
| YRI | FOXD4L2 | 67817867 | 0      | 0      | 0       |
| YRI | FOXD4L2 | 67822867 | 0.3291 | 1.3445 | -1.6492 |
| YRI | FOXD4L2 | 67827867 | 2.1626 | 2.8571 | -0.6281 |
| YRI | FOXD4L2 | 67832867 | 2.3319 | 2.1848 | 0.1652  |
| YRI | FOXD4L2 | 67837867 | 1.2714 | 2.0167 | -0.8911 |
| YRI | FOXD4L2 | 67842867 | 1.5887 | 2.3529 | -0.8089 |
| YRI | FOXD4L2 | 67847867 | 1.8179 | 1.6806 | 0.1889  |
| YRI | FOXD4L2 | 67852867 | 1.0208 | 0.8403 | 0.4077  |
| YRI | FOXD4L2 | 67857867 | 0.505  | 0.6722 | -0.4377 |
| YRI | FOXD4L2 | 67862867 | 1.3129 | 0.8403 | 1.0674  |
| YRI | FOXD4L2 | 67867867 | 1.3122 | 0.5042 | 2.5393  |
| YRI | FOXD4L2 | 67872867 | 0.4858 | 0.1681 | 1.8886  |
| YRI | FOXD4L2 | 67877867 | 0.1782 | 0.3361 | -0.6339 |
| YRI | FOXD4L2 | 67882867 | 0.2497 | 0.6722 | -1.1061 |
| YRI | FOXD4L2 | 67887867 | 1.0267 | 2.3529 | -1.4038 |
| YRI | FOXD4L2 | 67892867 | 1.1983 | 2.8571 | -1.5001 |
| YRI | FOXD4L2 | 67897867 | 5.0366 | 5.7141 | -0.3378 |
| YRI | FOXD4L2 | 67902867 | 5.2381 | 5.8822 | -0.313  |
| YRI | FOXD4L2 | 67907867 | 0.5704 | 1.3445 | -1.2573 |
| YRI | FOXD4L2 | 67912867 | 1.9584 | 2.5209 | -0.5633 |
| YRI | FOXD4L2 | 67917867 | 3.785  | 4.0335 | -0.1681 |

## 2\_TajimasD\_data

|     |         |          |         |         |         |
|-----|---------|----------|---------|---------|---------|
| YRI | FOXD4L2 | 67922867 | 2.0255  | 2.1848  | -0.1789 |
| YRI | FOXD4L2 | 67927867 | 0.8699  | 1.0084  | -0.2761 |
| YRI | FOXD4L2 | 67932867 | 2.347   | 2.1848  | 0.1821  |
| YRI | FOXD4L2 | 67937867 | 2.4371  | 2.689   | -0.2394 |
| YRI | FOXD4L2 | 67942867 | 0.9332  | 2.0167  | -1.2955 |
| YRI | FOXD4L2 | 67947867 | 2.4127  | 4.2016  | -1.1686 |
| YRI | FOXD4L2 | 67952867 | 2.3664  | 3.3612  | -0.7859 |
| YRI | FOXD4L2 | 67957867 | 0       | 0       | 0       |
| YRI | FOXD4L2 | 67962867 | 1.5137  | 2.1848  | -0.7535 |
| YRI | FOXD4L2 | 67967867 | 1.7606  | 2.8571  | -0.9916 |
| YRI | FOXD4L2 | 67972867 | 0.2931  | 1.1764  | -1.5798 |
| YRI | FOXD4L2 | 67977867 | 0.0646  | 0.8403  | -1.752  |
| YRI | FOXD4L2 | 67982867 | 0.7664  | 1.5126  | -1.1111 |
| YRI | FOXD4L2 | 67987867 | 0.7479  | 1.1764  | -0.7664 |
| YRI | FOXD4L2 | 67992867 | 0       | 0       | 0       |
| YRI | FOXD4L2 | 67997867 | 0       | 0       | 0       |
| YRI | FOXD4L2 | 68002867 | 0       | 0       | 0       |
| YRI | FOXD4L2 | 68007867 | 0       | 0       | 0       |
| YRI | FOXD4L2 | 68012867 | 0       | 0       | 0       |
| YRI | FOXD4L2 | 68017867 | 0       | 0       | 0       |
| YRI | FOXD4L2 | 68022867 | 0       | 0       | 0       |
| YRI | FOXD4L2 | 68027867 | 0       | 0       | 0       |
| YRI | FOXD4L2 | 68032867 | 0       | 0       | 0       |
| YRI | FOXD4L2 | 68037867 | 0       | 0       | 0       |
| YRI | FOXD4L2 | 68042867 | 0       | 0       | 0       |
| YRI | FOXD4L2 | 68047867 | 0       | 0       | 0       |
| YRI | FOXD4L2 | 68052867 | 0       | 0       | 0       |
| YRI | FOXD4L2 | 68057867 | 0       | 0       | 0       |
| YRI | FOXD4L2 | 68062867 | 0       | 0       | 0       |
| YRI | FOXD4L2 | 68067867 | 0       | 0       | 0       |
| YRI | FOXD4L2 | 68072867 | 0       | 0       | 0       |
| YRI | FOXD4L2 | 68077867 | 0       | 0       | 0       |
| YRI | FOXD4L2 | 68082867 | 0       | 0       | 0       |
| YRI | FOXD4L2 | 68087867 | 0       | 0       | 0       |
| YRI | FOXD4L2 | 68092867 | 0       | 0       | 0       |
| YRI | FOXD4L2 | 68097867 | 0       | 0       | 0       |
| YRI | FOXD4L2 | 68102867 | 0       | 0       | 0       |
| YRI | FOXD4L2 | 68107867 | 0       | 0       | 0       |
| YRI | FOXD4L2 | 68112867 | 0       | 0       | 0       |
| YRI | FOXD4L2 | 68117867 | 0       | 0       | 0       |
| YRI | FOXD4L2 | 68122867 | 0       | 0       | 0       |
| YRI | FOXD4L2 | 68127867 | 0       | 0       | 0       |
| YRI | FOXD4L2 | 68132867 | 0       | 0       | 0       |
| YRI | FOXD4L2 | 68137867 | 1.7797  | 2.0167  | -0.2834 |
| YRI | FOXD4L2 | 68142867 | 5.3599  | 6.2183  | -0.3968 |
| YRI | FOXD4L2 | 68147867 | 8.8868  | 10.5879 | -0.4824 |
| YRI | FOXD4L2 | 68152867 | 10.5442 | 11.4282 | -0.2334 |
| YRI | FOXD4L2 | 68157867 | 7.4417  | 8.5712  | -0.3898 |
| YRI | FOXD4L2 | 68162867 | 4.5669  | 7.2267  | -1.0733 |

## 2\_TajimasD\_data

|     |         |          |         |         |         |
|-----|---------|----------|---------|---------|---------|
| YRI | FOXD4L2 | 68167867 | 7.34    | 9.7476  | -0.7375 |
| YRI | FOXD4L2 | 68172867 | 10.5513 | 11.2602 | -0.1898 |
| YRI | FOXD4L2 | 68177867 | 12.109  | 11.4282 | 0.1797  |
| YRI | FOXD4L2 | 68182867 | 12.4871 | 12.2685 | 0.054   |
| YRI | FOXD4L2 | 68187867 | 8.6314  | 8.235   | 0.1419  |
| YRI | FOXD4L2 | 68192867 | 6.7349  | 6.2183  | 0.2388  |
| YRI | FOXD4L2 | 68197867 | 11.2014 | 9.7476  | 0.4454  |
| YRI | FOXD4L2 | 68202867 | 13.4456 | 11.0921 | 0.639   |
| YRI | FOXD4L2 | 68207867 | 10.239  | 9.7476  | 0.1505  |
| YRI | FOXD4L2 | 68212867 | 8.0243  | 8.4031  | -0.1331 |
| YRI | FOXD4L2 | 68217867 | 8.1185  | 8.5712  | -0.1562 |
| YRI | FOXD4L2 | 68222867 | 9.8117  | 11.5963 | -0.4647 |
| YRI | FOXD4L2 | 68227867 | 9.3023  | 10.756  | -0.4062 |
| YRI | FOXD4L2 | 68232867 | 6.0954  | 7.2267  | -0.4565 |
| YRI | FOXD4L2 | 68237867 | 5.9546  | 6.8906  | -0.3944 |
| YRI | FOXD4L2 | 68242867 | 6.5862  | 7.0586  | -0.1947 |
| YRI | FOXD4L2 | 68247867 | 6.8671  | 8.067   | -0.4378 |
| YRI | FOXD4L2 | 68252867 | 8.6963  | 9.4115  | -0.2264 |
| YRI | FOXD4L2 | 68257867 | 7.1603  | 8.4031  | -0.4368 |
| YRI | FOXD4L2 | 68262867 | 3.4753  | 5.8822  | -1.1695 |
| YRI | FOXD4L2 | 68267867 | 3.561   | 5.8822  | -1.1279 |
| YRI | FOXD4L2 | 68272867 | 5.2754  | 8.235   | -1.0597 |
| YRI | FOXD4L2 | 68277867 | 8.4369  | 10.924  | -0.685  |
| YRI | FOXD4L2 | 68282867 | 10.2183 | 10.0837 | 0.04    |
| YRI | FOXD4L2 | 68287867 | 9.2016  | 10.0837 | -0.2618 |
| YRI | FOXD4L2 | 68292867 | 8.6759  | 10.924  | -0.6192 |
| YRI | FOXD4L2 | 68297867 | 10.8998 | 12.2685 | -0.338  |
| YRI | FOXD4L2 | 68302867 | 10.706  | 11.9324 | -0.3109 |
| YRI | FOXD4L2 | 68307867 | 6.1109  | 8.067   | -0.7138 |
| YRI | FOXD4L2 | 68312867 | 5.8844  | 8.4031  | -0.8852 |
| YRI | FOXD4L2 | 68317867 | 18.7927 | 16.6382 | 0.3983  |
| YRI | FOXD4L2 | 68322867 | 21.8614 | 19.1591 | 0.4363  |
| YRI | FOXD4L2 | 68327867 | 9.4907  | 12.6047 | -0.7496 |
| YRI | FOXD4L2 | 68332867 | 8.5138  | 12.4366 | -0.9564 |
| YRI | FOXD4L2 | 68337867 | 9.33    | 11.4282 | -0.5539 |
| YRI | FOXD4L2 | 68342867 | 9.546   | 11.9324 | -0.6049 |
| YRI | FOXD4L2 | 68347867 | 12.757  | 14.9575 | -0.4503 |
| YRI | FOXD4L2 | 68352867 | 9.7335  | 11.9324 | -0.5574 |
| YRI | FOXD4L2 | 68357867 | 10.8629 | 9.5795  | 0.3996  |
| YRI | FOXD4L2 | 68362867 | 12.6439 | 8.9073  | 1.2445  |
| YRI | FOXD4L2 | 68367867 | 8.8009  | 8.9073  | -0.0354 |
| YRI | FOXD4L2 | 68372867 | 8.5447  | 10.2518 | -0.4989 |
| YRI | FOXD4L2 | 68377867 | 7.5536  | 8.5712  | -0.3512 |
| YRI | FOXD4L2 | 68382867 | 16.4483 | 10.4199 | 1.7354  |
| YRI | FOXD4L2 | 68387867 | 23.8632 | 12.7727 | 2.6366  |
| YRI | FOXD4L2 | 68392867 | 15.6546 | 10.0837 | 1.6535  |
| YRI | FOXD4L2 | 68397867 | 7.846   | 10.0837 | -0.6642 |
| YRI | FOXD4L2 | 68402867 | 7.3646  | 12.4366 | -1.2365 |
| YRI | FOXD4L2 | 68407867 | 14.1247 | 14.1172 | 0.0016  |

## 2\_TajimasD\_data

|     |         |          |         |         |         |
|-----|---------|----------|---------|---------|---------|
| YRI | FOXD4L2 | 68412867 | 29.7503 | 16.4701 | 2.4792  |
| YRI | FOXD4L2 | 68417867 | 33.8969 | 16.302  | 3.317   |
| YRI | FOXD4L2 | 68422867 | 18.8255 | 11.5963 | 1.8825  |
| YRI | FOXD4L2 | 68427867 | 9.7811  | 9.7476  | 0.0103  |
| YRI | FOXD4L2 | 68432867 | 11.6001 | 12.7727 | -0.2788 |
| YRI | FOXD4L2 | 68437867 | 16.5515 | 16.4701 | 0.0152  |
| YRI | FOXD4L2 | 68442867 | 15.2013 | 17.1423 | -0.3487 |
| YRI | FOXD4L2 | 68447867 | 11.4728 | 14.7895 | -0.6861 |
| YRI | FOXD4L2 | 68452867 | 9.9016  | 11.5963 | -0.4413 |
| YRI | FOXD4L2 | 68457867 | 8.043   | 11.0921 | -0.8278 |
| YRI | FOXD4L2 | 68462867 | 8.5766  | 10.756  | -0.609  |
| YRI | FOXD4L2 | 68467867 | 9.705   | 10.924  | -0.3357 |
| YRI | FOXD4L2 | 68472867 | 10.6698 | 12.1005 | -0.3579 |
| YRI | FOXD4L2 | 68477867 | 13.1809 | 11.9324 | 0.3165  |
| YRI | FOXD4L2 | 68482867 | 12.581  | 11.2602 | 0.3536  |
| YRI | FOXD4L2 | 68487867 | 10.0652 | 13.445  | -0.7654 |
| YRI | FOXD4L2 | 68492867 | 9.7521  | 13.1089 | -0.7787 |
| YRI | FOXD4L2 | 68497867 | 9.507   | 13.2769 | -0.864  |
| YRI | FOXD4L2 | 68502867 | 10.6093 | 15.7978 | -1.0079 |
| YRI | FOXD4L2 | 68507867 | 13.2866 | 17.9827 | -0.8059 |
| YRI | FOXD4L2 | 68512867 | 8.8393  | 12.7727 | -0.9351 |
| YRI | FOXD4L2 | 68517867 | 1.1006  | 2.0167  | -1.0953 |
| YRI | FOXD4L2 | 68522867 | 0       | 0       | 0       |
| YRI | FOXD4L2 | 68527867 | 0       | 0       | 0       |
| YRI | FOXD4L2 | 68532867 | 0       | 0       | 0       |
| YRI | FOXD4L2 | 68537867 | 0       | 0       | 0       |
| YRI | FOXD4L2 | 68542867 | 0       | 0       | 0       |
| YRI | FOXD4L2 | 68547867 | 0       | 0       | 0       |
| YRI | FOXD4L2 | 68552867 | 0       | 0       | 0       |
| YRI | FOXD4L2 | 68557867 | 0       | 0       | 0       |
| YRI | FOXD4L2 | 68562867 | 0       | 0       | 0       |
| YRI | FOXD4L2 | 68567867 | 0       | 0       | 0       |
| YRI | FOXD4L2 | 68572867 | 0       | 0       | 0       |
| YRI | FOXD4L2 | 68577867 | 0       | 0       | 0       |
| YRI | FOXD4L2 | 68582867 | 0       | 0       | 0       |
| YRI | FOXD4L2 | 68587867 | 0       | 0       | 0       |
| YRI | FOXD4L2 | 68592867 | 0       | 0       | 0       |
| YRI | FOXD4L2 | 68597867 | 0       | 0       | 0       |
| YRI | FOXD4L2 | 68602867 | 0       | 0       | 0       |
| YRI | FOXD4L2 | 68607867 | 0       | 0       | 0       |
| YRI | FOXD4L2 | 68612867 | 0       | 0       | 0       |
| YRI | FOXD4L2 | 68617867 | 0       | 0       | 0       |
| YRI | FOXD4L2 | 68622867 | 0       | 0       | 0       |
| YRI | FOXD4L2 | 68627867 | 0       | 0       | 0       |
| YRI | FOXD4L2 | 68632867 | 0       | 0       | 0       |
| YRI | FOXD4L2 | 68637867 | 0       | 0       | 0       |
| YRI | FOXD4L2 | 68642867 | 0       | 0       | 0       |
| YRI | FOXD4L2 | 68647867 | 0       | 0       | 0       |
| YRI | FOXD4L2 | 68652867 | 0       | 0       | 0       |

## 2\_TajimasD\_data

|     |          |          |        |        |         |
|-----|----------|----------|--------|--------|---------|
| YRI | FOXD4L2  | 68657867 | 0      | 0      | 0       |
| YRI | FOXD4L2  | 68662867 | 0.3709 | 1.6806 | -1.8018 |
| YRI | FOXD4L2  | 68667867 | 1.714  | 5.7141 | -1.9947 |
| YRI | FOXD4L2  | 68672867 | 2.4316 | 6.3864 | -1.7849 |
| YRI | FOXD4L2  | 68677867 | 1.5829 | 3.6974 | -1.5412 |
| YRI | FOXD4L2  | 68682867 | 0.5953 | 2.3529 | -1.8605 |
| YRI | FOXD4L2  | 68687867 | 2.8475 | 3.6974 | -0.6195 |
| YRI | FOXD4L2  | 68692867 | 3.3284 | 4.5377 | -0.7389 |
| YRI | FOXD4L2  | 68697867 | 1.9901 | 3.1932 | -0.9922 |
| YRI | FOXD4L2  | 68702867 | 1.614  | 2.689  | -1.0216 |
| YRI | FOXD4L2  | 68707867 | 1.1461 | 3.1932 | -1.6883 |
| YRI | FOXD4L2  | 68712867 | 1.0419 | 3.1932 | -1.7742 |
| YRI | FOXD4L2  | 68717867 | 0.1106 | 1.5126 | -2.0876 |
| YRI | FOXD4L2  | 68722867 | 0.2006 | 1.6806 | -2.036  |
| YRI | FOXD4L2  | 68727867 | 0.8017 | 2.3529 | -1.642  |
| YRI | FOXD4L2  | 68732867 | 3.1765 | 5.2099 | -1.1006 |
| YRI | FOXD4L2  | 68737867 | 5.2792 | 7.5628 | -0.884  |
| YRI | FOXD4L2  | 68742867 | 3.8724 | 6.0502 | -1.0319 |
| YRI | FOXD4L2  | 68747867 | 2.6841 | 5.7141 | -1.5109 |
| YRI | FOXD4L2  | 68752867 | 3.7753 | 6.8906 | -1.3127 |
| YRI | FOXD4L2  | 68757867 | 3.1353 | 6.3864 | -1.4673 |
| YRI | FOXD4L2  | 68762867 | 1.7993 | 4.2016 | -1.5693 |
| YRI | FOXD4L2  | 68767867 | 2.0626 | 4.2016 | -1.3973 |
| YRI | FOXD4L2  | 68772867 | 2.521  | 5.378  | -1.5036 |
| YRI | FOXD4L2  | 68777867 | 2.7049 | 6.5544 | -1.6972 |
| YRI | FOXD4L2  | 68782867 | 2.7781 | 6.7225 | -1.6996 |
| YRI | FOXD4L2  | 68787867 | 3.3334 | 7.0586 | -1.5357 |
| YRI | FOXD4L2  | 68792867 | 2.8489 | 7.8989 | -1.8787 |
| YRI | FOXD4L2  | 68797867 | 2.6694 | 7.0586 | -1.8094 |
| CEU | GOLGA6L9 | 81934363 | 0      | 0      | 0       |
| CEU | GOLGA6L9 | 81939363 | 0      | 0      | 0       |
| CEU | GOLGA6L9 | 81944363 | 0      | 0      | 0       |
| CEU | GOLGA6L9 | 81949363 | 0      | 0      | 0       |
| CEU | GOLGA6L9 | 81954363 | 0      | 0      | 0       |
| CEU | GOLGA6L9 | 81959363 | 0      | 0      | 0       |
| CEU | GOLGA6L9 | 81964363 | 0      | 0      | 0       |
| CEU | GOLGA6L9 | 81969363 | 0      | 0      | 0       |
| CEU | GOLGA6L9 | 81974363 | 0      | 0      | 0       |
| CEU | GOLGA6L9 | 81979363 | 0      | 0      | 0       |
| CEU | GOLGA6L9 | 81984363 | 0      | 0      | 0       |
| CEU | GOLGA6L9 | 81989363 | 0      | 0      | 0       |
| CEU | GOLGA6L9 | 81994363 | 0      | 0      | 0       |
| CEU | GOLGA6L9 | 81999363 | 0      | 0      | 0       |
| CEU | GOLGA6L9 | 82004363 | 0      | 0      | 0       |
| CEU | GOLGA6L9 | 82009363 | 0      | 0      | 0       |
| CEU | GOLGA6L9 | 82014363 | 0      | 0      | 0       |
| CEU | GOLGA6L9 | 82019363 | 0      | 0      | 0       |
| CEU | GOLGA6L9 | 82024363 | 0      | 0      | 0       |
| CEU | GOLGA6L9 | 82029363 | 0      | 0      | 0       |

## 2\_TajimasD\_data

|     |          |          |   |   |   |
|-----|----------|----------|---|---|---|
| CEU | GOLGA6L9 | 82034363 | 0 | 0 | 0 |
| CEU | GOLGA6L9 | 82039363 | 0 | 0 | 0 |
| CEU | GOLGA6L9 | 82044363 | 0 | 0 | 0 |
| CEU | GOLGA6L9 | 82049363 | 0 | 0 | 0 |
| CEU | GOLGA6L9 | 82054363 | 0 | 0 | 0 |
| CEU | GOLGA6L9 | 82059363 | 0 | 0 | 0 |
| CEU | GOLGA6L9 | 82064363 | 0 | 0 | 0 |
| CEU | GOLGA6L9 | 82069363 | 0 | 0 | 0 |
| CEU | GOLGA6L9 | 82074363 | 0 | 0 | 0 |
| CEU | GOLGA6L9 | 82079363 | 0 | 0 | 0 |
| CEU | GOLGA6L9 | 82084363 | 0 | 0 | 0 |
| CEU | GOLGA6L9 | 82089363 | 0 | 0 | 0 |
| CEU | GOLGA6L9 | 82094363 | 0 | 0 | 0 |
| CEU | GOLGA6L9 | 82099363 | 0 | 0 | 0 |
| CEU | GOLGA6L9 | 82104363 | 0 | 0 | 0 |
| CEU | GOLGA6L9 | 82109363 | 0 | 0 | 0 |
| CEU | GOLGA6L9 | 82114363 | 0 | 0 | 0 |
| CEU | GOLGA6L9 | 82119363 | 0 | 0 | 0 |
| CEU | GOLGA6L9 | 82124363 | 0 | 0 | 0 |
| CEU | GOLGA6L9 | 82129363 | 0 | 0 | 0 |
| CEU | GOLGA6L9 | 82134363 | 0 | 0 | 0 |
| CEU | GOLGA6L9 | 82139363 | 0 | 0 | 0 |
| CEU | GOLGA6L9 | 82144363 | 0 | 0 | 0 |
| CEU | GOLGA6L9 | 82149363 | 0 | 0 | 0 |
| CEU | GOLGA6L9 | 82154363 | 0 | 0 | 0 |
| CEU | GOLGA6L9 | 82159363 | 0 | 0 | 0 |
| CEU | GOLGA6L9 | 82164363 | 0 | 0 | 0 |
| CEU | GOLGA6L9 | 82169363 | 0 | 0 | 0 |
| CEU | GOLGA6L9 | 82174363 | 0 | 0 | 0 |
| CEU | GOLGA6L9 | 82179363 | 0 | 0 | 0 |
| CEU | GOLGA6L9 | 82184363 | 0 | 0 | 0 |
| CEU | GOLGA6L9 | 82189363 | 0 | 0 | 0 |
| CEU | GOLGA6L9 | 82194363 | 0 | 0 | 0 |
| CEU | GOLGA6L9 | 82199363 | 0 | 0 | 0 |
| CEU | GOLGA6L9 | 82204363 | 0 | 0 | 0 |
| CEU | GOLGA6L9 | 82209363 | 0 | 0 | 0 |
| CEU | GOLGA6L9 | 82214363 | 0 | 0 | 0 |
| CEU | GOLGA6L9 | 82219363 | 0 | 0 | 0 |
| CEU | GOLGA6L9 | 82224363 | 0 | 0 | 0 |
| CEU | GOLGA6L9 | 82229363 | 0 | 0 | 0 |
| CEU | GOLGA6L9 | 82234363 | 0 | 0 | 0 |
| CEU | GOLGA6L9 | 82239363 | 0 | 0 | 0 |
| CEU | GOLGA6L9 | 82244363 | 0 | 0 | 0 |
| CEU | GOLGA6L9 | 82249363 | 0 | 0 | 0 |
| CEU | GOLGA6L9 | 82254363 | 0 | 0 | 0 |
| CEU | GOLGA6L9 | 82259363 | 0 | 0 | 0 |
| CEU | GOLGA6L9 | 82264363 | 0 | 0 | 0 |
| CEU | GOLGA6L9 | 82269363 | 0 | 0 | 0 |
| CEU | GOLGA6L9 | 82274363 | 0 | 0 | 0 |

## 2\_TajimasD\_data

|     |          |          |   |   |   |
|-----|----------|----------|---|---|---|
| CEU | GOLGA6L9 | 82279363 | 0 | 0 | 0 |
| CEU | GOLGA6L9 | 82284363 | 0 | 0 | 0 |
| CEU | GOLGA6L9 | 82289363 | 0 | 0 | 0 |
| CEU | GOLGA6L9 | 82294363 | 0 | 0 | 0 |
| CEU | GOLGA6L9 | 82299363 | 0 | 0 | 0 |
| CEU | GOLGA6L9 | 82304363 | 0 | 0 | 0 |
| CEU | GOLGA6L9 | 82309363 | 0 | 0 | 0 |
| CEU | GOLGA6L9 | 82314363 | 0 | 0 | 0 |
| CEU | GOLGA6L9 | 82319363 | 0 | 0 | 0 |
| CEU | GOLGA6L9 | 82324363 | 0 | 0 | 0 |
| CEU | GOLGA6L9 | 82329363 | 0 | 0 | 0 |
| CEU | GOLGA6L9 | 82334363 | 0 | 0 | 0 |
| CEU | GOLGA6L9 | 82339363 | 0 | 0 | 0 |
| CEU | GOLGA6L9 | 82344363 | 0 | 0 | 0 |
| CEU | GOLGA6L9 | 82349363 | 0 | 0 | 0 |
| CEU | GOLGA6L9 | 82354363 | 0 | 0 | 0 |
| CEU | GOLGA6L9 | 82359363 | 0 | 0 | 0 |
| CEU | GOLGA6L9 | 82364363 | 0 | 0 | 0 |
| CEU | GOLGA6L9 | 82369363 | 0 | 0 | 0 |
| CEU | GOLGA6L9 | 82374363 | 0 | 0 | 0 |
| CEU | GOLGA6L9 | 82379363 | 0 | 0 | 0 |
| CEU | GOLGA6L9 | 82384363 | 0 | 0 | 0 |
| CEU | GOLGA6L9 | 82389363 | 0 | 0 | 0 |
| CEU | GOLGA6L9 | 82394363 | 0 | 0 | 0 |
| CEU | GOLGA6L9 | 82399363 | 0 | 0 | 0 |
| CEU | GOLGA6L9 | 82404363 | 0 | 0 | 0 |
| CEU | GOLGA6L9 | 82409363 | 0 | 0 | 0 |
| CEU | GOLGA6L9 | 82414363 | 0 | 0 | 0 |
| CEU | GOLGA6L9 | 82419363 | 0 | 0 | 0 |
| CEU | GOLGA6L9 | 82424363 | 0 | 0 | 0 |
| CEU | GOLGA6L9 | 82429363 | 0 | 0 | 0 |
| CEU | GOLGA6L9 | 82434363 | 0 | 0 | 0 |
| CEU | GOLGA6L9 | 82439363 | 0 | 0 | 0 |
| CEU | GOLGA6L9 | 82444363 | 0 | 0 | 0 |
| CEU | GOLGA6L9 | 82449363 | 0 | 0 | 0 |
| CEU | GOLGA6L9 | 82454363 | 0 | 0 | 0 |
| CEU | GOLGA6L9 | 82459363 | 0 | 0 | 0 |
| CEU | GOLGA6L9 | 82464363 | 0 | 0 | 0 |
| CEU | GOLGA6L9 | 82469363 | 0 | 0 | 0 |
| CEU | GOLGA6L9 | 82474363 | 0 | 0 | 0 |
| CEU | GOLGA6L9 | 82479363 | 0 | 0 | 0 |
| CEU | GOLGA6L9 | 82484363 | 0 | 0 | 0 |
| CEU | GOLGA6L9 | 82489363 | 0 | 0 | 0 |
| CEU | GOLGA6L9 | 82494363 | 0 | 0 | 0 |
| CEU | GOLGA6L9 | 82499363 | 0 | 0 | 0 |
| CEU | GOLGA6L9 | 82504363 | 0 | 0 | 0 |
| CEU | GOLGA6L9 | 82509363 | 0 | 0 | 0 |
| CEU | GOLGA6L9 | 82514363 | 0 | 0 | 0 |
| CEU | GOLGA6L9 | 82519363 | 0 | 0 | 0 |

## 2\_TajimasD\_data

|     |          |          |   |   |   |
|-----|----------|----------|---|---|---|
| CEU | GOLGA6L9 | 82524363 | 0 | 0 | 0 |
| CEU | GOLGA6L9 | 82529363 | 0 | 0 | 0 |
| CEU | GOLGA6L9 | 82534363 | 0 | 0 | 0 |
| CEU | GOLGA6L9 | 82539363 | 0 | 0 | 0 |
| CEU | GOLGA6L9 | 82544363 | 0 | 0 | 0 |
| CEU | GOLGA6L9 | 82549363 | 0 | 0 | 0 |
| CEU | GOLGA6L9 | 82554363 | 0 | 0 | 0 |
| CEU | GOLGA6L9 | 82559363 | 0 | 0 | 0 |
| CEU | GOLGA6L9 | 82564363 | 0 | 0 | 0 |
| CEU | GOLGA6L9 | 82569363 | 0 | 0 | 0 |
| CEU | GOLGA6L9 | 82574363 | 0 | 0 | 0 |
| CEU | GOLGA6L9 | 82579363 | 0 | 0 | 0 |
| CEU | GOLGA6L9 | 82584363 | 0 | 0 | 0 |
| CEU | GOLGA6L9 | 82589363 | 0 | 0 | 0 |
| CEU | GOLGA6L9 | 82594363 | 0 | 0 | 0 |
| CEU | GOLGA6L9 | 82599363 | 0 | 0 | 0 |
| CEU | GOLGA6L9 | 82604363 | 0 | 0 | 0 |
| CEU | GOLGA6L9 | 82609363 | 0 | 0 | 0 |
| CEU | GOLGA6L9 | 82614363 | 0 | 0 | 0 |
| CEU | GOLGA6L9 | 82619363 | 0 | 0 | 0 |
| CEU | GOLGA6L9 | 82624363 | 0 | 0 | 0 |
| CEU | GOLGA6L9 | 82629363 | 0 | 0 | 0 |
| CEU | GOLGA6L9 | 82634363 | 0 | 0 | 0 |
| CEU | GOLGA6L9 | 82639363 | 0 | 0 | 0 |
| CEU | GOLGA6L9 | 82644363 | 0 | 0 | 0 |
| CEU | GOLGA6L9 | 82649363 | 0 | 0 | 0 |
| CEU | GOLGA6L9 | 82654363 | 0 | 0 | 0 |
| CEU | GOLGA6L9 | 82659363 | 0 | 0 | 0 |
| CEU | GOLGA6L9 | 82664363 | 0 | 0 | 0 |
| CEU | GOLGA6L9 | 82669363 | 0 | 0 | 0 |
| CEU | GOLGA6L9 | 82674363 | 0 | 0 | 0 |
| CEU | GOLGA6L9 | 82679363 | 0 | 0 | 0 |
| CEU | GOLGA6L9 | 82684363 | 0 | 0 | 0 |
| CEU | GOLGA6L9 | 82689363 | 0 | 0 | 0 |
| CEU | GOLGA6L9 | 82694363 | 0 | 0 | 0 |
| CEU | GOLGA6L9 | 82699363 | 0 | 0 | 0 |
| CEU | GOLGA6L9 | 82704363 | 0 | 0 | 0 |
| CEU | GOLGA6L9 | 82709363 | 0 | 0 | 0 |
| CEU | GOLGA6L9 | 82714363 | 0 | 0 | 0 |
| CEU | GOLGA6L9 | 82719363 | 0 | 0 | 0 |
| CEU | GOLGA6L9 | 82724363 | 0 | 0 | 0 |
| CEU | GOLGA6L9 | 82729363 | 0 | 0 | 0 |
| CEU | GOLGA6L9 | 82734363 | 0 | 0 | 0 |
| CEU | GOLGA6L9 | 82739363 | 0 | 0 | 0 |
| CEU | GOLGA6L9 | 82744363 | 0 | 0 | 0 |
| CEU | GOLGA6L9 | 82749363 | 0 | 0 | 0 |
| CEU | GOLGA6L9 | 82754363 | 0 | 0 | 0 |
| CEU | GOLGA6L9 | 82759363 | 0 | 0 | 0 |
| CEU | GOLGA6L9 | 82764363 | 0 | 0 | 0 |



## 2\_TajimasD\_data

|     |          |          |   |   |   |
|-----|----------|----------|---|---|---|
| CEU | GOLGA6L9 | 82769363 | 0 | 0 | 0 |
| CEU | GOLGA6L9 | 82774363 | 0 | 0 | 0 |
| CEU | GOLGA6L9 | 82779363 | 0 | 0 | 0 |
| CEU | GOLGA6L9 | 82784363 | 0 | 0 | 0 |
| CEU | GOLGA6L9 | 82789363 | 0 | 0 | 0 |
| CEU | GOLGA6L9 | 82794363 | 0 | 0 | 0 |
| CEU | GOLGA6L9 | 82799363 | 0 | 0 | 0 |
| CEU | GOLGA6L9 | 82804363 | 0 | 0 | 0 |
| CEU | GOLGA6L9 | 82809363 | 0 | 0 | 0 |
| CEU | GOLGA6L9 | 82814363 | 0 | 0 | 0 |
| CEU | GOLGA6L9 | 82819363 | 0 | 0 | 0 |
| CEU | GOLGA6L9 | 82824363 | 0 | 0 | 0 |
| CEU | GOLGA6L9 | 82829363 | 0 | 0 | 0 |
| CEU | GOLGA6L9 | 82834363 | 0 | 0 | 0 |
| CEU | GOLGA6L9 | 82839363 | 0 | 0 | 0 |
| CEU | GOLGA6L9 | 82844363 | 0 | 0 | 0 |
| CEU | GOLGA6L9 | 82849363 | 0 | 0 | 0 |
| CEU | GOLGA6L9 | 82854363 | 0 | 0 | 0 |
| CEU | GOLGA6L9 | 82859363 | 0 | 0 | 0 |
| CEU | GOLGA6L9 | 82864363 | 0 | 0 | 0 |
| CEU | GOLGA6L9 | 82869363 | 0 | 0 | 0 |
| CEU | GOLGA6L9 | 82874363 | 0 | 0 | 0 |
| CEU | GOLGA6L9 | 82879363 | 0 | 0 | 0 |
| CEU | GOLGA6L9 | 82884363 | 0 | 0 | 0 |
| CEU | GOLGA6L9 | 82889363 | 0 | 0 | 0 |
| CEU | GOLGA6L9 | 82894363 | 0 | 0 | 0 |
| CEU | GOLGA6L9 | 82899363 | 0 | 0 | 0 |
| CEU | GOLGA6L9 | 82904363 | 0 | 0 | 0 |
| CEU | GOLGA6L9 | 82909363 | 0 | 0 | 0 |
| CEU | GOLGA6L9 | 82914363 | 0 | 0 | 0 |
| CEU | GOLGA6L9 | 82919363 | 0 | 0 | 0 |
| CEU | GOLGA6L9 | 82924363 | 0 | 0 | 0 |
| CEU | GOLGA6L9 | 82929363 | 0 | 0 | 0 |
| CHB | GOLGA6L9 | 81934363 | 0 | 0 | 0 |
| CHB | GOLGA6L9 | 81939363 | 0 | 0 | 0 |
| CHB | GOLGA6L9 | 81944363 | 0 | 0 | 0 |
| CHB | GOLGA6L9 | 81949363 | 0 | 0 | 0 |
| CHB | GOLGA6L9 | 81954363 | 0 | 0 | 0 |
| CHB | GOLGA6L9 | 81959363 | 0 | 0 | 0 |
| CHB | GOLGA6L9 | 81964363 | 0 | 0 | 0 |
| CHB | GOLGA6L9 | 81969363 | 0 | 0 | 0 |
| CHB | GOLGA6L9 | 81974363 | 0 | 0 | 0 |
| CHB | GOLGA6L9 | 81979363 | 0 | 0 | 0 |
| CHB | GOLGA6L9 | 81984363 | 0 | 0 | 0 |
| CHB | GOLGA6L9 | 81989363 | 0 | 0 | 0 |
| CHB | GOLGA6L9 | 81994363 | 0 | 0 | 0 |
| CHB | GOLGA6L9 | 81999363 | 0 | 0 | 0 |
| CHB | GOLGA6L9 | 82004363 | 0 | 0 | 0 |
| CHB | GOLGA6L9 | 82009363 | 0 | 0 | 0 |

## 2\_TajimasD\_data

|     |          |          |   |   |   |
|-----|----------|----------|---|---|---|
| CHB | GOLGA6L9 | 82014363 | 0 | 0 | 0 |
| CHB | GOLGA6L9 | 82019363 | 0 | 0 | 0 |
| CHB | GOLGA6L9 | 82024363 | 0 | 0 | 0 |
| CHB | GOLGA6L9 | 82029363 | 0 | 0 | 0 |
| CHB | GOLGA6L9 | 82034363 | 0 | 0 | 0 |
| CHB | GOLGA6L9 | 82039363 | 0 | 0 | 0 |
| CHB | GOLGA6L9 | 82044363 | 0 | 0 | 0 |
| CHB | GOLGA6L9 | 82049363 | 0 | 0 | 0 |
| CHB | GOLGA6L9 | 82054363 | 0 | 0 | 0 |
| CHB | GOLGA6L9 | 82059363 | 0 | 0 | 0 |
| CHB | GOLGA6L9 | 82064363 | 0 | 0 | 0 |
| CHB | GOLGA6L9 | 82069363 | 0 | 0 | 0 |
| CHB | GOLGA6L9 | 82074363 | 0 | 0 | 0 |
| CHB | GOLGA6L9 | 82079363 | 0 | 0 | 0 |
| CHB | GOLGA6L9 | 82084363 | 0 | 0 | 0 |
| CHB | GOLGA6L9 | 82089363 | 0 | 0 | 0 |
| CHB | GOLGA6L9 | 82094363 | 0 | 0 | 0 |
| CHB | GOLGA6L9 | 82099363 | 0 | 0 | 0 |
| CHB | GOLGA6L9 | 82104363 | 0 | 0 | 0 |
| CHB | GOLGA6L9 | 82109363 | 0 | 0 | 0 |
| CHB | GOLGA6L9 | 82114363 | 0 | 0 | 0 |
| CHB | GOLGA6L9 | 82119363 | 0 | 0 | 0 |
| CHB | GOLGA6L9 | 82124363 | 0 | 0 | 0 |
| CHB | GOLGA6L9 | 82129363 | 0 | 0 | 0 |
| CHB | GOLGA6L9 | 82134363 | 0 | 0 | 0 |
| CHB | GOLGA6L9 | 82139363 | 0 | 0 | 0 |
| CHB | GOLGA6L9 | 82144363 | 0 | 0 | 0 |
| CHB | GOLGA6L9 | 82149363 | 0 | 0 | 0 |
| CHB | GOLGA6L9 | 82154363 | 0 | 0 | 0 |
| CHB | GOLGA6L9 | 82159363 | 0 | 0 | 0 |
| CHB | GOLGA6L9 | 82164363 | 0 | 0 | 0 |
| CHB | GOLGA6L9 | 82169363 | 0 | 0 | 0 |
| CHB | GOLGA6L9 | 82174363 | 0 | 0 | 0 |
| CHB | GOLGA6L9 | 82179363 | 0 | 0 | 0 |
| CHB | GOLGA6L9 | 82184363 | 0 | 0 | 0 |
| CHB | GOLGA6L9 | 82189363 | 0 | 0 | 0 |
| CHB | GOLGA6L9 | 82194363 | 0 | 0 | 0 |
| CHB | GOLGA6L9 | 82199363 | 0 | 0 | 0 |
| CHB | GOLGA6L9 | 82204363 | 0 | 0 | 0 |
| CHB | GOLGA6L9 | 82209363 | 0 | 0 | 0 |
| CHB | GOLGA6L9 | 82214363 | 0 | 0 | 0 |
| CHB | GOLGA6L9 | 82219363 | 0 | 0 | 0 |
| CHB | GOLGA6L9 | 82224363 | 0 | 0 | 0 |
| CHB | GOLGA6L9 | 82229363 | 0 | 0 | 0 |
| CHB | GOLGA6L9 | 82234363 | 0 | 0 | 0 |
| CHB | GOLGA6L9 | 82239363 | 0 | 0 | 0 |
| CHB | GOLGA6L9 | 82244363 | 0 | 0 | 0 |
| CHB | GOLGA6L9 | 82249363 | 0 | 0 | 0 |
| CHB | GOLGA6L9 | 82254363 | 0 | 0 | 0 |

## 2\_TajimasD\_data

|     |          |          |   |   |   |
|-----|----------|----------|---|---|---|
| CHB | GOLGA6L9 | 82259363 | 0 | 0 | 0 |
| CHB | GOLGA6L9 | 82264363 | 0 | 0 | 0 |
| CHB | GOLGA6L9 | 82269363 | 0 | 0 | 0 |
| CHB | GOLGA6L9 | 82274363 | 0 | 0 | 0 |
| CHB | GOLGA6L9 | 82279363 | 0 | 0 | 0 |
| CHB | GOLGA6L9 | 82284363 | 0 | 0 | 0 |
| CHB | GOLGA6L9 | 82289363 | 0 | 0 | 0 |
| CHB | GOLGA6L9 | 82294363 | 0 | 0 | 0 |
| CHB | GOLGA6L9 | 82299363 | 0 | 0 | 0 |
| CHB | GOLGA6L9 | 82304363 | 0 | 0 | 0 |
| CHB | GOLGA6L9 | 82309363 | 0 | 0 | 0 |
| CHB | GOLGA6L9 | 82314363 | 0 | 0 | 0 |
| CHB | GOLGA6L9 | 82319363 | 0 | 0 | 0 |
| CHB | GOLGA6L9 | 82324363 | 0 | 0 | 0 |
| CHB | GOLGA6L9 | 82329363 | 0 | 0 | 0 |
| CHB | GOLGA6L9 | 82334363 | 0 | 0 | 0 |
| CHB | GOLGA6L9 | 82339363 | 0 | 0 | 0 |
| CHB | GOLGA6L9 | 82344363 | 0 | 0 | 0 |
| CHB | GOLGA6L9 | 82349363 | 0 | 0 | 0 |
| CHB | GOLGA6L9 | 82354363 | 0 | 0 | 0 |
| CHB | GOLGA6L9 | 82359363 | 0 | 0 | 0 |
| CHB | GOLGA6L9 | 82364363 | 0 | 0 | 0 |
| CHB | GOLGA6L9 | 82369363 | 0 | 0 | 0 |
| CHB | GOLGA6L9 | 82374363 | 0 | 0 | 0 |
| CHB | GOLGA6L9 | 82379363 | 0 | 0 | 0 |
| CHB | GOLGA6L9 | 82384363 | 0 | 0 | 0 |
| CHB | GOLGA6L9 | 82389363 | 0 | 0 | 0 |
| CHB | GOLGA6L9 | 82394363 | 0 | 0 | 0 |
| CHB | GOLGA6L9 | 82399363 | 0 | 0 | 0 |
| CHB | GOLGA6L9 | 82404363 | 0 | 0 | 0 |
| CHB | GOLGA6L9 | 82409363 | 0 | 0 | 0 |
| CHB | GOLGA6L9 | 82414363 | 0 | 0 | 0 |
| CHB | GOLGA6L9 | 82419363 | 0 | 0 | 0 |
| CHB | GOLGA6L9 | 82424363 | 0 | 0 | 0 |
| CHB | GOLGA6L9 | 82429363 | 0 | 0 | 0 |
| CHB | GOLGA6L9 | 82434363 | 0 | 0 | 0 |
| CHB | GOLGA6L9 | 82439363 | 0 | 0 | 0 |
| CHB | GOLGA6L9 | 82444363 | 0 | 0 | 0 |
| CHB | GOLGA6L9 | 82449363 | 0 | 0 | 0 |
| CHB | GOLGA6L9 | 82454363 | 0 | 0 | 0 |
| CHB | GOLGA6L9 | 82459363 | 0 | 0 | 0 |
| CHB | GOLGA6L9 | 82464363 | 0 | 0 | 0 |
| CHB | GOLGA6L9 | 82469363 | 0 | 0 | 0 |
| CHB | GOLGA6L9 | 82474363 | 0 | 0 | 0 |
| CHB | GOLGA6L9 | 82479363 | 0 | 0 | 0 |
| CHB | GOLGA6L9 | 82484363 | 0 | 0 | 0 |
| CHB | GOLGA6L9 | 82489363 | 0 | 0 | 0 |
| CHB | GOLGA6L9 | 82494363 | 0 | 0 | 0 |
| CHB | GOLGA6L9 | 82499363 | 0 | 0 | 0 |

## 2\_TajimasD\_data

|     |          |          |   |   |   |
|-----|----------|----------|---|---|---|
| CHB | GOLGA6L9 | 82504363 | 0 | 0 | 0 |
| CHB | GOLGA6L9 | 82509363 | 0 | 0 | 0 |
| CHB | GOLGA6L9 | 82514363 | 0 | 0 | 0 |
| CHB | GOLGA6L9 | 82519363 | 0 | 0 | 0 |
| CHB | GOLGA6L9 | 82524363 | 0 | 0 | 0 |
| CHB | GOLGA6L9 | 82529363 | 0 | 0 | 0 |
| CHB | GOLGA6L9 | 82534363 | 0 | 0 | 0 |
| CHB | GOLGA6L9 | 82539363 | 0 | 0 | 0 |
| CHB | GOLGA6L9 | 82544363 | 0 | 0 | 0 |
| CHB | GOLGA6L9 | 82549363 | 0 | 0 | 0 |
| CHB | GOLGA6L9 | 82554363 | 0 | 0 | 0 |
| CHB | GOLGA6L9 | 82559363 | 0 | 0 | 0 |
| CHB | GOLGA6L9 | 82564363 | 0 | 0 | 0 |
| CHB | GOLGA6L9 | 82569363 | 0 | 0 | 0 |
| CHB | GOLGA6L9 | 82574363 | 0 | 0 | 0 |
| CHB | GOLGA6L9 | 82579363 | 0 | 0 | 0 |
| CHB | GOLGA6L9 | 82584363 | 0 | 0 | 0 |
| CHB | GOLGA6L9 | 82589363 | 0 | 0 | 0 |
| CHB | GOLGA6L9 | 82594363 | 0 | 0 | 0 |
| CHB | GOLGA6L9 | 82599363 | 0 | 0 | 0 |
| CHB | GOLGA6L9 | 82604363 | 0 | 0 | 0 |
| CHB | GOLGA6L9 | 82609363 | 0 | 0 | 0 |
| CHB | GOLGA6L9 | 82614363 | 0 | 0 | 0 |
| CHB | GOLGA6L9 | 82619363 | 0 | 0 | 0 |
| CHB | GOLGA6L9 | 82624363 | 0 | 0 | 0 |
| CHB | GOLGA6L9 | 82629363 | 0 | 0 | 0 |
| CHB | GOLGA6L9 | 82634363 | 0 | 0 | 0 |
| CHB | GOLGA6L9 | 82639363 | 0 | 0 | 0 |
| CHB | GOLGA6L9 | 82644363 | 0 | 0 | 0 |
| CHB | GOLGA6L9 | 82649363 | 0 | 0 | 0 |
| CHB | GOLGA6L9 | 82654363 | 0 | 0 | 0 |
| CHB | GOLGA6L9 | 82659363 | 0 | 0 | 0 |
| CHB | GOLGA6L9 | 82664363 | 0 | 0 | 0 |
| CHB | GOLGA6L9 | 82669363 | 0 | 0 | 0 |
| CHB | GOLGA6L9 | 82674363 | 0 | 0 | 0 |
| CHB | GOLGA6L9 | 82679363 | 0 | 0 | 0 |
| CHB | GOLGA6L9 | 82684363 | 0 | 0 | 0 |
| CHB | GOLGA6L9 | 82689363 | 0 | 0 | 0 |
| CHB | GOLGA6L9 | 82694363 | 0 | 0 | 0 |
| CHB | GOLGA6L9 | 82699363 | 0 | 0 | 0 |
| CHB | GOLGA6L9 | 82704363 | 0 | 0 | 0 |
| CHB | GOLGA6L9 | 82709363 | 0 | 0 | 0 |
| CHB | GOLGA6L9 | 82714363 | 0 | 0 | 0 |
| CHB | GOLGA6L9 | 82719363 | 0 | 0 | 0 |
| CHB | GOLGA6L9 | 82724363 | 0 | 0 | 0 |
| CHB | GOLGA6L9 | 82729363 | 0 | 0 | 0 |
| CHB | GOLGA6L9 | 82734363 | 0 | 0 | 0 |
| CHB | GOLGA6L9 | 82739363 | 0 | 0 | 0 |
| CHB | GOLGA6L9 | 82744363 | 0 | 0 | 0 |

## 2\_TajimasD\_data

|     |          |          |   |   |   |
|-----|----------|----------|---|---|---|
| CHB | GOLGA6L9 | 82749363 | 0 | 0 | 0 |
| CHB | GOLGA6L9 | 82754363 | 0 | 0 | 0 |
| CHB | GOLGA6L9 | 82759363 | 0 | 0 | 0 |
| CHB | GOLGA6L9 | 82764363 | 0 | 0 | 0 |
| CHB | GOLGA6L9 | 82769363 | 0 | 0 | 0 |
| CHB | GOLGA6L9 | 82774363 | 0 | 0 | 0 |
| CHB | GOLGA6L9 | 82779363 | 0 | 0 | 0 |
| CHB | GOLGA6L9 | 82784363 | 0 | 0 | 0 |
| CHB | GOLGA6L9 | 82789363 | 0 | 0 | 0 |
| CHB | GOLGA6L9 | 82794363 | 0 | 0 | 0 |
| CHB | GOLGA6L9 | 82799363 | 0 | 0 | 0 |
| CHB | GOLGA6L9 | 82804363 | 0 | 0 | 0 |
| CHB | GOLGA6L9 | 82809363 | 0 | 0 | 0 |
| CHB | GOLGA6L9 | 82814363 | 0 | 0 | 0 |
| CHB | GOLGA6L9 | 82819363 | 0 | 0 | 0 |
| CHB | GOLGA6L9 | 82824363 | 0 | 0 | 0 |
| CHB | GOLGA6L9 | 82829363 | 0 | 0 | 0 |
| CHB | GOLGA6L9 | 82834363 | 0 | 0 | 0 |
| CHB | GOLGA6L9 | 82839363 | 0 | 0 | 0 |
| CHB | GOLGA6L9 | 82844363 | 0 | 0 | 0 |
| CHB | GOLGA6L9 | 82849363 | 0 | 0 | 0 |
| CHB | GOLGA6L9 | 82854363 | 0 | 0 | 0 |
| CHB | GOLGA6L9 | 82859363 | 0 | 0 | 0 |
| CHB | GOLGA6L9 | 82864363 | 0 | 0 | 0 |
| CHB | GOLGA6L9 | 82869363 | 0 | 0 | 0 |
| CHB | GOLGA6L9 | 82874363 | 0 | 0 | 0 |
| CHB | GOLGA6L9 | 82879363 | 0 | 0 | 0 |
| CHB | GOLGA6L9 | 82884363 | 0 | 0 | 0 |
| CHB | GOLGA6L9 | 82889363 | 0 | 0 | 0 |
| CHB | GOLGA6L9 | 82894363 | 0 | 0 | 0 |
| CHB | GOLGA6L9 | 82899363 | 0 | 0 | 0 |
| CHB | GOLGA6L9 | 82904363 | 0 | 0 | 0 |
| CHB | GOLGA6L9 | 82909363 | 0 | 0 | 0 |
| CHB | GOLGA6L9 | 82914363 | 0 | 0 | 0 |
| CHB | GOLGA6L9 | 82919363 | 0 | 0 | 0 |
| CHB | GOLGA6L9 | 82924363 | 0 | 0 | 0 |
| CHB | GOLGA6L9 | 82929363 | 0 | 0 | 0 |
| YRI | GOLGA6L9 | 81934363 | 0 | 0 | 0 |
| YRI | GOLGA6L9 | 81939363 | 0 | 0 | 0 |
| YRI | GOLGA6L9 | 81944363 | 0 | 0 | 0 |
| YRI | GOLGA6L9 | 81949363 | 0 | 0 | 0 |
| YRI | GOLGA6L9 | 81954363 | 0 | 0 | 0 |
| YRI | GOLGA6L9 | 81959363 | 0 | 0 | 0 |
| YRI | GOLGA6L9 | 81964363 | 0 | 0 | 0 |
| YRI | GOLGA6L9 | 81969363 | 0 | 0 | 0 |
| YRI | GOLGA6L9 | 81974363 | 0 | 0 | 0 |
| YRI | GOLGA6L9 | 81979363 | 0 | 0 | 0 |
| YRI | GOLGA6L9 | 81984363 | 0 | 0 | 0 |
| YRI | GOLGA6L9 | 81989363 | 0 | 0 | 0 |

## 2\_TajimasD\_data

|     |          |          |   |   |   |
|-----|----------|----------|---|---|---|
| YRI | GOLGA6L9 | 81994363 | 0 | 0 | 0 |
| YRI | GOLGA6L9 | 81999363 | 0 | 0 | 0 |
| YRI | GOLGA6L9 | 82004363 | 0 | 0 | 0 |
| YRI | GOLGA6L9 | 82009363 | 0 | 0 | 0 |
| YRI | GOLGA6L9 | 82014363 | 0 | 0 | 0 |
| YRI | GOLGA6L9 | 82019363 | 0 | 0 | 0 |
| YRI | GOLGA6L9 | 82024363 | 0 | 0 | 0 |
| YRI | GOLGA6L9 | 82029363 | 0 | 0 | 0 |
| YRI | GOLGA6L9 | 82034363 | 0 | 0 | 0 |
| YRI | GOLGA6L9 | 82039363 | 0 | 0 | 0 |
| YRI | GOLGA6L9 | 82044363 | 0 | 0 | 0 |
| YRI | GOLGA6L9 | 82049363 | 0 | 0 | 0 |
| YRI | GOLGA6L9 | 82054363 | 0 | 0 | 0 |
| YRI | GOLGA6L9 | 82059363 | 0 | 0 | 0 |
| YRI | GOLGA6L9 | 82064363 | 0 | 0 | 0 |
| YRI | GOLGA6L9 | 82069363 | 0 | 0 | 0 |
| YRI | GOLGA6L9 | 82074363 | 0 | 0 | 0 |
| YRI | GOLGA6L9 | 82079363 | 0 | 0 | 0 |
| YRI | GOLGA6L9 | 82084363 | 0 | 0 | 0 |
| YRI | GOLGA6L9 | 82089363 | 0 | 0 | 0 |
| YRI | GOLGA6L9 | 82094363 | 0 | 0 | 0 |
| YRI | GOLGA6L9 | 82099363 | 0 | 0 | 0 |
| YRI | GOLGA6L9 | 82104363 | 0 | 0 | 0 |
| YRI | GOLGA6L9 | 82109363 | 0 | 0 | 0 |
| YRI | GOLGA6L9 | 82114363 | 0 | 0 | 0 |
| YRI | GOLGA6L9 | 82119363 | 0 | 0 | 0 |
| YRI | GOLGA6L9 | 82124363 | 0 | 0 | 0 |
| YRI | GOLGA6L9 | 82129363 | 0 | 0 | 0 |
| YRI | GOLGA6L9 | 82134363 | 0 | 0 | 0 |
| YRI | GOLGA6L9 | 82139363 | 0 | 0 | 0 |
| YRI | GOLGA6L9 | 82144363 | 0 | 0 | 0 |
| YRI | GOLGA6L9 | 82149363 | 0 | 0 | 0 |
| YRI | GOLGA6L9 | 82154363 | 0 | 0 | 0 |
| YRI | GOLGA6L9 | 82159363 | 0 | 0 | 0 |
| YRI | GOLGA6L9 | 82164363 | 0 | 0 | 0 |
| YRI | GOLGA6L9 | 82169363 | 0 | 0 | 0 |
| YRI | GOLGA6L9 | 82174363 | 0 | 0 | 0 |
| YRI | GOLGA6L9 | 82179363 | 0 | 0 | 0 |
| YRI | GOLGA6L9 | 82184363 | 0 | 0 | 0 |
| YRI | GOLGA6L9 | 82189363 | 0 | 0 | 0 |
| YRI | GOLGA6L9 | 82194363 | 0 | 0 | 0 |
| YRI | GOLGA6L9 | 82199363 | 0 | 0 | 0 |
| YRI | GOLGA6L9 | 82204363 | 0 | 0 | 0 |
| YRI | GOLGA6L9 | 82209363 | 0 | 0 | 0 |
| YRI | GOLGA6L9 | 82214363 | 0 | 0 | 0 |
| YRI | GOLGA6L9 | 82219363 | 0 | 0 | 0 |
| YRI | GOLGA6L9 | 82224363 | 0 | 0 | 0 |
| YRI | GOLGA6L9 | 82229363 | 0 | 0 | 0 |
| YRI | GOLGA6L9 | 82234363 | 0 | 0 | 0 |

## 2\_TajimasD\_data

|     |          |          |   |   |   |
|-----|----------|----------|---|---|---|
| YRI | GOLGA6L9 | 82239363 | 0 | 0 | 0 |
| YRI | GOLGA6L9 | 82244363 | 0 | 0 | 0 |
| YRI | GOLGA6L9 | 82249363 | 0 | 0 | 0 |
| YRI | GOLGA6L9 | 82254363 | 0 | 0 | 0 |
| YRI | GOLGA6L9 | 82259363 | 0 | 0 | 0 |
| YRI | GOLGA6L9 | 82264363 | 0 | 0 | 0 |
| YRI | GOLGA6L9 | 82269363 | 0 | 0 | 0 |
| YRI | GOLGA6L9 | 82274363 | 0 | 0 | 0 |
| YRI | GOLGA6L9 | 82279363 | 0 | 0 | 0 |
| YRI | GOLGA6L9 | 82284363 | 0 | 0 | 0 |
| YRI | GOLGA6L9 | 82289363 | 0 | 0 | 0 |
| YRI | GOLGA6L9 | 82294363 | 0 | 0 | 0 |
| YRI | GOLGA6L9 | 82299363 | 0 | 0 | 0 |
| YRI | GOLGA6L9 | 82304363 | 0 | 0 | 0 |
| YRI | GOLGA6L9 | 82309363 | 0 | 0 | 0 |
| YRI | GOLGA6L9 | 82314363 | 0 | 0 | 0 |
| YRI | GOLGA6L9 | 82319363 | 0 | 0 | 0 |
| YRI | GOLGA6L9 | 82324363 | 0 | 0 | 0 |
| YRI | GOLGA6L9 | 82329363 | 0 | 0 | 0 |
| YRI | GOLGA6L9 | 82334363 | 0 | 0 | 0 |
| YRI | GOLGA6L9 | 82339363 | 0 | 0 | 0 |
| YRI | GOLGA6L9 | 82344363 | 0 | 0 | 0 |
| YRI | GOLGA6L9 | 82349363 | 0 | 0 | 0 |
| YRI | GOLGA6L9 | 82354363 | 0 | 0 | 0 |
| YRI | GOLGA6L9 | 82359363 | 0 | 0 | 0 |
| YRI | GOLGA6L9 | 82364363 | 0 | 0 | 0 |
| YRI | GOLGA6L9 | 82369363 | 0 | 0 | 0 |
| YRI | GOLGA6L9 | 82374363 | 0 | 0 | 0 |
| YRI | GOLGA6L9 | 82379363 | 0 | 0 | 0 |
| YRI | GOLGA6L9 | 82384363 | 0 | 0 | 0 |
| YRI | GOLGA6L9 | 82389363 | 0 | 0 | 0 |
| YRI | GOLGA6L9 | 82394363 | 0 | 0 | 0 |
| YRI | GOLGA6L9 | 82399363 | 0 | 0 | 0 |
| YRI | GOLGA6L9 | 82404363 | 0 | 0 | 0 |
| YRI | GOLGA6L9 | 82409363 | 0 | 0 | 0 |
| YRI | GOLGA6L9 | 82414363 | 0 | 0 | 0 |
| YRI | GOLGA6L9 | 82419363 | 0 | 0 | 0 |
| YRI | GOLGA6L9 | 82424363 | 0 | 0 | 0 |
| YRI | GOLGA6L9 | 82429363 | 0 | 0 | 0 |
| YRI | GOLGA6L9 | 82434363 | 0 | 0 | 0 |
| YRI | GOLGA6L9 | 82439363 | 0 | 0 | 0 |
| YRI | GOLGA6L9 | 82444363 | 0 | 0 | 0 |
| YRI | GOLGA6L9 | 82449363 | 0 | 0 | 0 |
| YRI | GOLGA6L9 | 82454363 | 0 | 0 | 0 |
| YRI | GOLGA6L9 | 82459363 | 0 | 0 | 0 |
| YRI | GOLGA6L9 | 82464363 | 0 | 0 | 0 |
| YRI | GOLGA6L9 | 82469363 | 0 | 0 | 0 |
| YRI | GOLGA6L9 | 82474363 | 0 | 0 | 0 |
| YRI | GOLGA6L9 | 82479363 | 0 | 0 | 0 |

## 2\_TajimasD\_data

|     |          |          |   |   |   |
|-----|----------|----------|---|---|---|
| YRI | GOLGA6L9 | 82484363 | 0 | 0 | 0 |
| YRI | GOLGA6L9 | 82489363 | 0 | 0 | 0 |
| YRI | GOLGA6L9 | 82494363 | 0 | 0 | 0 |
| YRI | GOLGA6L9 | 82499363 | 0 | 0 | 0 |
| YRI | GOLGA6L9 | 82504363 | 0 | 0 | 0 |
| YRI | GOLGA6L9 | 82509363 | 0 | 0 | 0 |
| YRI | GOLGA6L9 | 82514363 | 0 | 0 | 0 |
| YRI | GOLGA6L9 | 82519363 | 0 | 0 | 0 |
| YRI | GOLGA6L9 | 82524363 | 0 | 0 | 0 |
| YRI | GOLGA6L9 | 82529363 | 0 | 0 | 0 |
| YRI | GOLGA6L9 | 82534363 | 0 | 0 | 0 |
| YRI | GOLGA6L9 | 82539363 | 0 | 0 | 0 |
| YRI | GOLGA6L9 | 82544363 | 0 | 0 | 0 |
| YRI | GOLGA6L9 | 82549363 | 0 | 0 | 0 |
| YRI | GOLGA6L9 | 82554363 | 0 | 0 | 0 |
| YRI | GOLGA6L9 | 82559363 | 0 | 0 | 0 |
| YRI | GOLGA6L9 | 82564363 | 0 | 0 | 0 |
| YRI | GOLGA6L9 | 82569363 | 0 | 0 | 0 |
| YRI | GOLGA6L9 | 82574363 | 0 | 0 | 0 |
| YRI | GOLGA6L9 | 82579363 | 0 | 0 | 0 |
| YRI | GOLGA6L9 | 82584363 | 0 | 0 | 0 |
| YRI | GOLGA6L9 | 82589363 | 0 | 0 | 0 |
| YRI | GOLGA6L9 | 82594363 | 0 | 0 | 0 |
| YRI | GOLGA6L9 | 82599363 | 0 | 0 | 0 |
| YRI | GOLGA6L9 | 82604363 | 0 | 0 | 0 |
| YRI | GOLGA6L9 | 82609363 | 0 | 0 | 0 |
| YRI | GOLGA6L9 | 82614363 | 0 | 0 | 0 |
| YRI | GOLGA6L9 | 82619363 | 0 | 0 | 0 |
| YRI | GOLGA6L9 | 82624363 | 0 | 0 | 0 |
| YRI | GOLGA6L9 | 82629363 | 0 | 0 | 0 |
| YRI | GOLGA6L9 | 82634363 | 0 | 0 | 0 |
| YRI | GOLGA6L9 | 82639363 | 0 | 0 | 0 |
| YRI | GOLGA6L9 | 82644363 | 0 | 0 | 0 |
| YRI | GOLGA6L9 | 82649363 | 0 | 0 | 0 |
| YRI | GOLGA6L9 | 82654363 | 0 | 0 | 0 |
| YRI | GOLGA6L9 | 82659363 | 0 | 0 | 0 |
| YRI | GOLGA6L9 | 82664363 | 0 | 0 | 0 |
| YRI | GOLGA6L9 | 82669363 | 0 | 0 | 0 |
| YRI | GOLGA6L9 | 82674363 | 0 | 0 | 0 |
| YRI | GOLGA6L9 | 82679363 | 0 | 0 | 0 |
| YRI | GOLGA6L9 | 82684363 | 0 | 0 | 0 |
| YRI | GOLGA6L9 | 82689363 | 0 | 0 | 0 |
| YRI | GOLGA6L9 | 82694363 | 0 | 0 | 0 |
| YRI | GOLGA6L9 | 82699363 | 0 | 0 | 0 |
| YRI | GOLGA6L9 | 82704363 | 0 | 0 | 0 |
| YRI | GOLGA6L9 | 82709363 | 0 | 0 | 0 |
| YRI | GOLGA6L9 | 82714363 | 0 | 0 | 0 |
| YRI | GOLGA6L9 | 82719363 | 0 | 0 | 0 |
| YRI | GOLGA6L9 | 82724363 | 0 | 0 | 0 |



## 2\_TajimasD\_data

|     |          |          |         |         |         |
|-----|----------|----------|---------|---------|---------|
| YRI | GOLGA6L9 | 82729363 | 0       | 0       | 0       |
| YRI | GOLGA6L9 | 82734363 | 0       | 0       | 0       |
| YRI | GOLGA6L9 | 82739363 | 0       | 0       | 0       |
| YRI | GOLGA6L9 | 82744363 | 0       | 0       | 0       |
| YRI | GOLGA6L9 | 82749363 | 0       | 0       | 0       |
| YRI | GOLGA6L9 | 82754363 | 0       | 0       | 0       |
| YRI | GOLGA6L9 | 82759363 | 0       | 0       | 0       |
| YRI | GOLGA6L9 | 82764363 | 0       | 0       | 0       |
| YRI | GOLGA6L9 | 82769363 | 0       | 0       | 0       |
| YRI | GOLGA6L9 | 82774363 | 0       | 0       | 0       |
| YRI | GOLGA6L9 | 82779363 | 0       | 0       | 0       |
| YRI | GOLGA6L9 | 82784363 | 0       | 0       | 0       |
| YRI | GOLGA6L9 | 82789363 | 0       | 0       | 0       |
| YRI | GOLGA6L9 | 82794363 | 0       | 0       | 0       |
| YRI | GOLGA6L9 | 82799363 | 0       | 0       | 0       |
| YRI | GOLGA6L9 | 82804363 | 0       | 0       | 0       |
| YRI | GOLGA6L9 | 82809363 | 0       | 0       | 0       |
| YRI | GOLGA6L9 | 82814363 | 0       | 0       | 0       |
| YRI | GOLGA6L9 | 82819363 | 0       | 0       | 0       |
| YRI | GOLGA6L9 | 82824363 | 0       | 0       | 0       |
| YRI | GOLGA6L9 | 82829363 | 0       | 0       | 0       |
| YRI | GOLGA6L9 | 82834363 | 0       | 0       | 0       |
| YRI | GOLGA6L9 | 82839363 | 0       | 0       | 0       |
| YRI | GOLGA6L9 | 82844363 | 0       | 0       | 0       |
| YRI | GOLGA6L9 | 82849363 | 0       | 0       | 0       |
| YRI | GOLGA6L9 | 82854363 | 0       | 0       | 0       |
| YRI | GOLGA6L9 | 82859363 | 0       | 0       | 0       |
| YRI | GOLGA6L9 | 82864363 | 0       | 0       | 0       |
| YRI | GOLGA6L9 | 82869363 | 0       | 0       | 0       |
| YRI | GOLGA6L9 | 82874363 | 0       | 0       | 0       |
| YRI | GOLGA6L9 | 82879363 | 0       | 0       | 0       |
| YRI | GOLGA6L9 | 82884363 | 0       | 0       | 0       |
| YRI | GOLGA6L9 | 82889363 | 0       | 0       | 0       |
| YRI | GOLGA6L9 | 82894363 | 0       | 0       | 0       |
| YRI | GOLGA6L9 | 82899363 | 0       | 0       | 0       |
| YRI | GOLGA6L9 | 82904363 | 0       | 0       | 0       |
| YRI | GOLGA6L9 | 82909363 | 0       | 0       | 0       |
| YRI | GOLGA6L9 | 82914363 | 0       | 0       | 0       |
| YRI | GOLGA6L9 | 82919363 | 0       | 0       | 0       |
| YRI | GOLGA6L9 | 82924363 | 0       | 0       | 0       |
| YRI | GOLGA6L9 | 82929363 | 0       | 0       | 0       |
| CEU | GOLGA8G  | 28024611 | 6.1876  | 6.4814  | -0.1317 |
| CEU | GOLGA8G  | 28029611 | 4.1839  | 4.7757  | -0.3481 |
| CEU | GOLGA8G  | 28034611 | 5.7046  | 5.1169  | 0.3253  |
| CEU | GOLGA8G  | 28039611 | 9.5813  | 6.3108  | 1.5016  |
| CEU | GOLGA8G  | 28044611 | 14.7918 | 7.6753  | 2.7354  |
| CEU | GOLGA8G  | 28049611 | 17.5168 | 9.0398  | 2.8027  |
| CEU | GOLGA8G  | 28054611 | 15.4832 | 9.7221  | 1.7804  |
| CEU | GOLGA8G  | 28059611 | 13.032  | 10.0632 | 0.8885  |

## 2\_TajimasD\_data

|     |         |          |         |         |         |
|-----|---------|----------|---------|---------|---------|
| CEU | GOLGA8G | 28064611 | 20.9843 | 11.9394 | 2.3061  |
| CEU | GOLGA8G | 28069611 | 30.4908 | 14.6684 | 3.3196  |
| CEU | GOLGA8G | 28074611 | 22.3972 | 12.4511 | 2.4374  |
| CEU | GOLGA8G | 28079611 | 14.4139 | 9.7221  | 1.4499  |
| CEU | GOLGA8G | 28084611 | 13.1097 | 12.1099 | 0.2515  |
| CEU | GOLGA8G | 28089611 | 14.223  | 13.9861 | 0.052   |
| CEU | GOLGA8G | 28094611 | 14.5199 | 11.2571 | 0.8792  |
| CEU | GOLGA8G | 28099611 | 8.8231  | 7.6753  | 0.4412  |
| CEU | GOLGA8G | 28104611 | 8.316   | 6.9931  | 0.5535  |
| CEU | GOLGA8G | 28109611 | 6.82    | 5.7991  | 0.5056  |
| CEU | GOLGA8G | 28114611 | 7.0423  | 6.9931  | 0.0206  |
| CEU | GOLGA8G | 28119611 | 9.1218  | 8.3576  | 0.2717  |
| CEU | GOLGA8G | 28124611 | 7.9542  | 6.6519  | 0.5702  |
| CEU | GOLGA8G | 28129611 | 8.1591  | 6.6519  | 0.6599  |
| CEU | GOLGA8G | 28134611 | 8.1317  | 6.4814  | 0.7397  |
| CEU | GOLGA8G | 28139611 | 9.2657  | 7.5047  | 0.6909  |
| CEU | GOLGA8G | 28144611 | 15.9732 | 12.1099 | 0.9719  |
| CEU | GOLGA8G | 28149611 | 21.7957 | 12.2805 | 2.3624  |
| CEU | GOLGA8G | 28154611 | 21.4475 | 10.916  | 2.9209  |
| CEU | GOLGA8G | 28159611 | 16.503  | 9.8926  | 2.01    |
| CEU | GOLGA8G | 28164611 | 14.3335 | 7.8459  | 2.444   |
| CEU | GOLGA8G | 28169611 | 16.2624 | 8.6987  | 2.5913  |
| CEU | GOLGA8G | 28174611 | 18.5671 | 10.4043 | 2.368   |
| CEU | GOLGA8G | 28179611 | 16.1684 | 10.5749 | 1.5982  |
| CEU | GOLGA8G | 28184611 | 11.2078 | 8.6987  | 0.8596  |
| CEU | GOLGA8G | 28189611 | 6.1043  | 5.2874  | 0.4393  |
| CEU | GOLGA8G | 28194611 | 3.0674  | 3.9229  | -0.5967 |
| CEU | GOLGA8G | 28199611 | 5.2713  | 5.6286  | -0.1817 |
| CEU | GOLGA8G | 28204611 | 5.0377  | 6.4814  | -0.6471 |
| CEU | GOLGA8G | 28209611 | 4.8345  | 6.1402  | -0.6144 |
| CEU | GOLGA8G | 28214611 | 7.9977  | 6.6519  | 0.5892  |
| CEU | GOLGA8G | 28219611 | 10.1894 | 7.3342  | 1.144   |
| CEU | GOLGA8G | 28224611 | 8.3859  | 7.3342  | 0.4214  |
| CEU | GOLGA8G | 28229611 | 7.3785  | 7.5047  | -0.0495 |
| CEU | GOLGA8G | 28234611 | 8.5442  | 7.8459  | 0.2631  |
| CEU | GOLGA8G | 28239611 | 14.7172 | 10.7454 | 1.1179  |
| CEU | GOLGA8G | 28244611 | 11.4962 | 9.2104  | 0.7428  |
| CEU | GOLGA8G | 28249611 | 2.1505  | 4.6052  | -1.4904 |
| CEU | GOLGA8G | 28254611 | 1.2935  | 3.4112  | -1.6633 |
| CEU | GOLGA8G | 28259611 | 1.8011  | 4.2641  | -1.5988 |
| CEU | GOLGA8G | 28264611 | 3.945   | 6.1402  | -1.033  |
| CEU | GOLGA8G | 28269611 | 3.8248  | 5.7991  | -0.9779 |
| CEU | GOLGA8G | 28274611 | 3.0289  | 4.9463  | -1.0935 |
| CEU | GOLGA8G | 28279611 | 3.9629  | 7.1636  | -1.3102 |
| CEU | GOLGA8G | 28284611 | 6.6864  | 9.0398  | -0.7781 |
| CEU | GOLGA8G | 28289611 | 6.7132  | 7.6753  | -0.3698 |
| CEU | GOLGA8G | 28294611 | 7.2181  | 8.8692  | -0.5556 |
| CEU | GOLGA8G | 28299611 | 9.0339  | 11.0866 | -0.5611 |
| CEU | GOLGA8G | 28304611 | 6.0448  | 8.187   | -0.7761 |

## 2\_TajimasD\_data

|     |         |          |        |         |         |
|-----|---------|----------|--------|---------|---------|
| CEU | GOLGA8G | 28309611 | 3.8889 | 6.1402  | -1.0594 |
| CEU | GOLGA8G | 28314611 | 3.2441 | 4.9463  | -0.9708 |
| CEU | GOLGA8G | 28319611 | 3.4251 | 4.2641  | -0.5446 |
| CEU | GOLGA8G | 28324611 | 4.6607 | 7.1636  | -1.0246 |
| CEU | GOLGA8G | 28329611 | 4.5467 | 6.6519  | -0.9217 |
| CEU | GOLGA8G | 28334611 | 3.2119 | 4.9463  | -0.9891 |
| CEU | GOLGA8G | 28339611 | 1.9654 | 4.9463  | -1.7    |
| CEU | GOLGA8G | 28344611 | 2.033  | 6.8225  | -2.0494 |
| CEU | GOLGA8G | 28349611 | 4.5514 | 12.7922 | -1.9686 |
| CEU | GOLGA8G | 28354611 | 4.5343 | 12.2805 | -1.9232 |
| CEU | GOLGA8G | 28359611 | 2.7811 | 7.5047  | -1.8533 |
| CEU | GOLGA8G | 28364611 | 2.5042 | 6.9931  | -1.8782 |
| CEU | GOLGA8G | 28369611 | 2.0472 | 6.8225  | -2.0433 |
| CEU | GOLGA8G | 28374611 | 2.0303 | 6.4814  | -1.9951 |
| CEU | GOLGA8G | 28379611 | 3.2185 | 9.0398  | -1.9247 |
| CEU | GOLGA8G | 28384611 | 2.9136 | 7.5047  | -1.8013 |
| CEU | GOLGA8G | 28389611 | 1.7159 | 5.7991  | -2.0224 |
| CEU | GOLGA8G | 28394611 | 1.8732 | 8.3576  | -2.305  |
| CEU | GOLGA8G | 28399611 | 2.1901 | 8.3576  | -2.1924 |
| CEU | GOLGA8G | 28404611 | 1.5069 | 5.7991  | -2.1259 |
| CEU | GOLGA8G | 28409611 | 1.068  | 4.6052  | -2.1476 |
| CEU | GOLGA8G | 28414611 | 3.2301 | 9.5515  | -1.9859 |
| CEU | GOLGA8G | 28419611 | 3.1901 | 9.2104  | -1.9563 |
| CEU | GOLGA8G | 28424611 | 1.7192 | 5.2874  | -1.9186 |
| CEU | GOLGA8G | 28429611 | 1.5492 | 5.7991  | -2.1049 |
| CEU | GOLGA8G | 28434611 | 1.3801 | 6.3108  | -2.2638 |
| CEU | GOLGA8G | 28439611 | 1.3888 | 6.4814  | -2.2826 |
| CEU | GOLGA8G | 28444611 | 1.0099 | 5.6286  | -2.3494 |
| CEU | GOLGA8G | 28449611 | 1.3587 | 5.458   | -2.143  |
| CEU | GOLGA8G | 28454611 | 2.1575 | 6.1402  | -1.8741 |
| CEU | GOLGA8G | 28459611 | 2.2369 | 7.1636  | -2.0167 |
| CEU | GOLGA8G | 28464611 | 2.6654 | 7.8459  | -1.9516 |
| CEU | GOLGA8G | 28469611 | 3.2259 | 8.6987  | -1.875  |
| CEU | GOLGA8G | 28474611 | 2.7279 | 8.0164  | -1.9533 |
| CEU | GOLGA8G | 28479611 | 2.6999 | 8.6987  | -2.0552 |
| CEU | GOLGA8G | 28484611 | 2.8087 | 8.5281  | -1.9956 |
| CEU | GOLGA8G | 28489611 | 1.6329 | 4.6052  | -1.8046 |
| CEU | GOLGA8G | 28494611 | 2.2599 | 6.1402  | -1.826  |
| CEU | GOLGA8G | 28499611 | 3.0276 | 6.8225  | -1.6238 |
| CEU | GOLGA8G | 28504611 | 2.2746 | 5.1169  | -1.5733 |
| CEU | GOLGA8G | 28509611 | 2.0909 | 5.7991  | -1.8366 |
| CEU | GOLGA8G | 28514611 | 1.8605 | 4.7757  | -1.7145 |
| CEU | GOLGA8G | 28519611 | 1.4808 | 4.2641  | -1.8068 |
| CEU | GOLGA8G | 28524611 | 1.3379 | 5.6286  | -2.1825 |
| CEU | GOLGA8G | 28529611 | 3.585  | 8.3576  | -1.6965 |
| CEU | GOLGA8G | 28534611 | 4.3438 | 8.5281  | -1.46   |
| CEU | GOLGA8G | 28539611 | 3.1956 | 8.0164  | -1.7806 |
| CEU | GOLGA8G | 28544611 | 2.9301 | 7.6753  | -1.8239 |
| CEU | GOLGA8G | 28549611 | 1.5731 | 5.2874  | -1.9972 |

## 2\_TajimasD\_data

|     |         |          |         |        |         |
|-----|---------|----------|---------|--------|---------|
| CEU | GOLGA8G | 28554611 | 0.9695  | 5.458  | -2.3465 |
| CEU | GOLGA8G | 28559611 | 2.1453  | 7.5047 | -2.1028 |
| CEU | GOLGA8G | 28564611 | 2.4646  | 7.1636 | -1.9235 |
| CEU | GOLGA8G | 28569611 | 1.3517  | 3.5818 | -1.6808 |
| CEU | GOLGA8G | 28574611 | 1.5492  | 1.7056 | -0.2142 |
| CEU | GOLGA8G | 28579611 | 1.079   | 0.8528 | 0.5094  |
| CEU | GOLGA8G | 28584611 | 0.0101  | 0.3411 | -1.3269 |
| CEU | GOLGA8G | 28589611 | 0.0501  | 0.5117 | -1.4477 |
| CEU | GOLGA8G | 28594611 | 0.2995  | 0.3411 | -0.1668 |
| CEU | GOLGA8G | 28599611 | 0.2797  | 0.5117 | -0.7276 |
| CEU | GOLGA8G | 28604611 | 0.2626  | 0.6822 | -1.0957 |
| CEU | GOLGA8G | 28609611 | 1.0831  | 1.0234 | 0.1186  |
| CEU | GOLGA8G | 28614611 | 2.2307  | 3.0701 | -0.72   |
| CEU | GOLGA8G | 28619611 | 1.5739  | 2.8996 | -1.1922 |
| CEU | GOLGA8G | 28624611 | 0.2527  | 0.6822 | -1.1216 |
| CEU | GOLGA8G | 28629611 | 2.1606  | 2.729  | -0.5373 |
| CEU | GOLGA8G | 28634611 | 2.0917  | 2.5584 | -0.4649 |
| CEU | GOLGA8G | 28639611 | 0.2307  | 0.3411 | -0.4426 |
| CEU | GOLGA8G | 28644611 | 0.4313  | 2.0467 | -1.9221 |
| CEU | GOLGA8G | 28649611 | 0.9798  | 2.729  | -1.6534 |
| CEU | GOLGA8G | 28654611 | 0.7792  | 1.1939 | -0.739  |
| CEU | GOLGA8G | 28659611 | 0.3156  | 1.7056 | -1.9038 |
| CEU | GOLGA8G | 28664611 | 0.3558  | 2.0467 | -2.012  |
| CEU | GOLGA8G | 28669611 | 0.5267  | 1.1939 | -1.189  |
| CEU | GOLGA8G | 28674611 | 2.4381  | 2.729  | -0.275  |
| CEU | GOLGA8G | 28679611 | 2.0606  | 2.3879 | -0.3447 |
| CEU | GOLGA8G | 28684611 | 0.5867  | 1.8762 | -1.6418 |
| CEU | GOLGA8G | 28689611 | 0.5576  | 2.0467 | -1.7719 |
| CEU | GOLGA8G | 28694611 | 0.8431  | 2.2173 | -1.5352 |
| CEU | GOLGA8G | 28699611 | 4.8679  | 5.1169 | -0.1378 |
| CEU | GOLGA8G | 28704611 | 10.3884 | 8.6987 | 0.5789  |
| CEU | GOLGA8G | 28709611 | 7.3156  | 6.3108 | 0.4613  |
| CEU | GOLGA8G | 28714611 | 1.1216  | 1.7056 | -0.7999 |
| CEU | GOLGA8G | 28719611 | 0.3727  | 1.1939 | -1.4634 |
| CEU | GOLGA8G | 28724611 | 0.51    | 0.8528 | -0.772  |
| CEU | GOLGA8G | 28729611 | 0.5857  | 1.5351 | -1.4078 |
| CEU | GOLGA8G | 28734611 | 0.6776  | 2.729  | -1.939  |
| CEU | GOLGA8G | 28739611 | 1.236   | 3.5818 | -1.768  |
| CEU | GOLGA8G | 28744611 | 2.3533  | 2.729  | -0.3551 |
| CEU | GOLGA8G | 28749611 | 1.7988  | 1.5351 | 0.391   |
| CEU | GOLGA8G | 28754611 | 1.4632  | 2.0467 | -0.6943 |
| CEU | GOLGA8G | 28759611 | 1.6011  | 1.5351 | 0.0979  |
| CEU | GOLGA8G | 28764611 | 1.0111  | 2.729  | -1.6238 |
| CEU | GOLGA8G | 28769611 | 0.551   | 3.0701 | -2.1608 |
| CEU | GOLGA8G | 28774611 | 0.0802  | 0.8528 | -1.7399 |
| CEU | GOLGA8G | 28779611 | 0.7337  | 0.6822 | 0.1345  |
| CEU | GOLGA8G | 28784611 | 1.2358  | 1.1939 | 0.0747  |
| CEU | GOLGA8G | 28789611 | 0.572   | 0.8528 | -0.6324 |
| CEU | GOLGA8G | 28794611 | 0.0301  | 0.1706 | -0.8346 |

## 2\_TajimasD\_data

|     |         |          |        |         |         |
|-----|---------|----------|--------|---------|---------|
| CEU | GOLGA8G | 28799611 | 0.2719 | 0.1706  | 0.6017  |
| CEU | GOLGA8G | 28804611 | 0.3787 | 0.5117  | -0.4171 |
| CEU | GOLGA8G | 28809611 | 1.2086 | 2.3879  | -1.2419 |
| CEU | GOLGA8G | 28814611 | 1.142  | 2.3879  | -1.3121 |
| CEU | GOLGA8G | 28819611 | 0.0402 | 0.3411  | -1.2062 |
| CEU | GOLGA8G | 28824611 | 0      | 0       | 0       |
| CEU | GOLGA8G | 28829611 | 1.1006 | 0.8528  | 0.558   |
| CEU | GOLGA8G | 28834611 | 1.308  | 1.7056  | -0.5446 |
| CEU | GOLGA8G | 28839611 | 0.2773 | 1.3645  | -1.7589 |
| CEU | GOLGA8G | 28844611 | 0.22   | 1.8762  | -2.1086 |
| CEU | GOLGA8G | 28849611 | 0.22   | 1.8762  | -2.1086 |
| CEU | GOLGA8G | 28854611 | 1.2253 | 3.2407  | -1.6526 |
| CEU | GOLGA8G | 28859611 | 1.1554 | 2.729   | -1.4874 |
| CEU | GOLGA8G | 28864611 | 0.0699 | 0.5117  | -1.3856 |
| CEU | GOLGA8G | 28869611 | 0.16   | 1.1939  | -1.8424 |
| CEU | GOLGA8G | 28874611 | 1.3655 | 1.8762  | -0.6502 |
| CEU | GOLGA8G | 28879611 | 1.2754 | 1.1939  | 0.1452  |
| CEU | GOLGA8G | 28884611 | 0.4457 | 0.6822  | -0.6176 |
| CEU | GOLGA8G | 28889611 | 0.7782 | 1.5351  | -1.1223 |
| CEU | GOLGA8G | 28894611 | 1.2981 | 3.7524  | -1.7781 |
| CEU | GOLGA8G | 28899611 | 2.4698 | 6.4814  | -1.7981 |
| CEU | GOLGA8G | 28904611 | 1.5042 | 3.5818  | -1.5659 |
| CEU | GOLGA8G | 28909611 | 0.2789 | 1.5351  | -1.8627 |
| CEU | GOLGA8G | 28914611 | 0.4879 | 2.5584  | -2.0626 |
| CEU | GOLGA8G | 28919611 | 1.8611 | 3.9229  | -1.438  |
| CEU | GOLGA8G | 28924611 | 2.2538 | 5.458   | -1.6751 |
| CEU | GOLGA8G | 28929611 | 2.3084 | 6.8225  | -1.9316 |
| CEU | GOLGA8G | 28934611 | 2.826  | 7.6753  | -1.8639 |
| CEU | GOLGA8G | 28939611 | 3.2    | 8.3576  | -1.8334 |
| CEU | GOLGA8G | 28944611 | 6.7225 | 13.8156 | -1.5753 |
| CEU | GOLGA8G | 28949611 | 5.5407 | 11.2571 | -1.5403 |
| CEU | GOLGA8G | 28954611 | 2.3931 | 6.8225  | -1.8953 |
| CEU | GOLGA8G | 28959611 | 4.0715 | 9.8926  | -1.77   |
| CEU | GOLGA8G | 28964611 | 4.6759 | 9.5515  | -1.5317 |
| CEU | GOLGA8G | 28969611 | 3.7574 | 9.2104  | -1.7719 |
| CEU | GOLGA8G | 28974611 | 3.2235 | 10.0632 | -2.0469 |
| CEU | GOLGA8G | 28979611 | 3.7609 | 10.7454 | -1.9659 |
| CEU | GOLGA8G | 28984611 | 4.5364 | 12.2805 | -1.9227 |
| CEU | GOLGA8G | 28989611 | 7.2103 | 13.1333 | -1.3801 |
| CEU | GOLGA8G | 28994611 | 7.1152 | 9.3809  | -0.7238 |
| CEU | GOLGA8G | 28999611 | 2.2756 | 3.0701  | -0.6815 |
| CEU | GOLGA8G | 29004611 | 0.0303 | 0.3411  | -1.2459 |
| CEU | GOLGA8G | 29009611 | 0      | 0       | 0       |
| CEU | GOLGA8G | 29014611 | 0      | 0       | 0       |
| CEU | GOLGA8G | 29019611 | 0      | 0       | 0       |
| CEU | GOLGA8G | 29024611 | 0      | 0       | 0       |
| CHB | GOLGA8G | 28024611 | 5.902  | 6.0989  | -0.0929 |
| CHB | GOLGA8G | 28029611 | 4.4441 | 4.4048  | 0.0247  |
| CHB | GOLGA8G | 28034611 | 4.7935 | 5.5907  | -0.4067 |

## 2\_TajimasD\_data

|     |         |          |         |         |         |
|-----|---------|----------|---------|---------|---------|
| CHB | GOLGA8G | 28039611 | 10.2802 | 7.9625  | 0.8589  |
| CHB | GOLGA8G | 28044611 | 13.5616 | 9.4872  | 1.2843  |
| CHB | GOLGA8G | 28049611 | 8.4607  | 10.8426 | -0.6629 |
| CHB | GOLGA8G | 28054611 | 6.6071  | 10.6731 | -1.1484 |
| CHB | GOLGA8G | 28059611 | 11.4925 | 9.8261  | 0.5084  |
| CHB | GOLGA8G | 28064611 | 20.6868 | 12.8755 | 1.8493  |
| CHB | GOLGA8G | 28069611 | 30.6889 | 15.925  | 2.8559  |
| CHB | GOLGA8G | 28074611 | 22.2557 | 12.1979 | 2.5058  |
| CHB | GOLGA8G | 28079611 | 10.5958 | 8.4708  | 0.7439  |
| CHB | GOLGA8G | 28084611 | 8.9935  | 7.6237  | 0.5282  |
| CHB | GOLGA8G | 28089611 | 11.9665 | 9.1484  | 0.9188  |
| CHB | GOLGA8G | 28094611 | 14.016  | 9.9955  | 1.2073  |
| CHB | GOLGA8G | 28099611 | 9.5071  | 7.1154  | 0.9822  |
| CHB | GOLGA8G | 28104611 | 8.6263  | 6.0989  | 1.193   |
| CHB | GOLGA8G | 28109611 | 6.2758  | 6.0989  | 0.0835  |
| CHB | GOLGA8G | 28114611 | 5.7777  | 7.4543  | -0.66   |
| CHB | GOLGA8G | 28119611 | 8.5585  | 9.1484  | -0.1923 |
| CHB | GOLGA8G | 28124611 | 7.5342  | 7.4543  | 0.0315  |
| CHB | GOLGA8G | 28129611 | 8.2381  | 6.2684  | 0.9072  |
| CHB | GOLGA8G | 28134611 | 8.8435  | 6.4378  | 1.0817  |
| CHB | GOLGA8G | 28139611 | 10.3737 | 7.9625  | 0.8935  |
| CHB | GOLGA8G | 28144611 | 15.3548 | 12.7061 | 0.635   |
| CHB | GOLGA8G | 28149611 | 14.9339 | 13.2144 | 0.3972  |
| CHB | GOLGA8G | 28154611 | 12.6789 | 11.012  | 0.4572  |
| CHB | GOLGA8G | 28159611 | 11.8271 | 9.9955  | 0.55    |
| CHB | GOLGA8G | 28164611 | 10.7561 | 8.4708  | 0.8     |
| CHB | GOLGA8G | 28169611 | 12.996  | 8.1319  | 1.768   |
| CHB | GOLGA8G | 28174611 | 17.1671 | 9.4872  | 2.4209  |
| CHB | GOLGA8G | 28179611 | 13.2418 | 10.5037 | 0.785   |
| CHB | GOLGA8G | 28184611 | 6.4769  | 9.4872  | -0.9489 |
| CHB | GOLGA8G | 28189611 | 3.3581  | 6.2684  | -1.3404 |
| CHB | GOLGA8G | 28194611 | 2.6966  | 10.6731 | -2.2529 |
| CHB | GOLGA8G | 28199611 | 3.7034  | 14.2309 | -2.2667 |
| CHB | GOLGA8G | 28204611 | 2.9917  | 9.3178  | -2.0278 |
| CHB | GOLGA8G | 28209611 | 3.2227  | 7.7931  | -1.7274 |
| CHB | GOLGA8G | 28214611 | 4.9892  | 8.3013  | -1.1812 |
| CHB | GOLGA8G | 28219611 | 5.5646  | 10.3343 | -1.3884 |
| CHB | GOLGA8G | 28224611 | 4.7034  | 10.3343 | -1.6391 |
| CHB | GOLGA8G | 28229611 | 6.7788  | 9.1484  | -0.7726 |
| CHB | GOLGA8G | 28234611 | 11.7049 | 9.4872  | 0.6991  |
| CHB | GOLGA8G | 28239611 | 20.2069 | 10.8426 | 2.6061  |
| CHB | GOLGA8G | 28244611 | 14.9825 | 10.6731 | 1.2171  |
| CHB | GOLGA8G | 28249611 | 2.7797  | 6.7766  | -1.7157 |
| CHB | GOLGA8G | 28254611 | 0.7476  | 3.8965  | -2.2024 |
| CHB | GOLGA8G | 28259611 | 1.5125  | 4.5742  | -1.8643 |
| CHB | GOLGA8G | 28264611 | 3.7068  | 6.7766  | -1.3178 |
| CHB | GOLGA8G | 28269611 | 4.454   | 6.946   | -1.046  |
| CHB | GOLGA8G | 28274611 | 4.3861  | 6.946   | -1.0745 |
| CHB | GOLGA8G | 28279611 | 4.9962  | 9.1484  | -1.3538 |

## 2\_TajimasD\_data

|     |         |          |        |         |         |
|-----|---------|----------|--------|---------|---------|
| CHB | GOLGA8G | 28284611 | 8.0898 | 10.5037 | -0.6921 |
| CHB | GOLGA8G | 28289611 | 7.9125 | 9.3178  | -0.4505 |
| CHB | GOLGA8G | 28294611 | 6.375  | 11.8591 | -1.4031 |
| CHB | GOLGA8G | 28299611 | 5.6949 | 15.7556 | -1.9661 |
| CHB | GOLGA8G | 28304611 | 3.623  | 13.045  | -2.2032 |
| CHB | GOLGA8G | 28309611 | 3.6878 | 10.1649 | -1.9147 |
| CHB | GOLGA8G | 28314611 | 4.1502 | 9.1484  | -1.6296 |
| CHB | GOLGA8G | 28319611 | 6.3044 | 9.8261  | -1.0745 |
| CHB | GOLGA8G | 28324611 | 7.2123 | 15.4168 | -1.6369 |
| CHB | GOLGA8G | 28329611 | 6.541  | 15.0779 | -1.7397 |
| CHB | GOLGA8G | 28334611 | 5.7026 | 10.1649 | -1.3191 |
| CHB | GOLGA8G | 28339611 | 4.0249 | 8.3013  | -1.5252 |
| CHB | GOLGA8G | 28344611 | 4.4283 | 8.8096  | -1.4792 |
| CHB | GOLGA8G | 28349611 | 8.4438 | 13.7226 | -1.1765 |
| CHB | GOLGA8G | 28354611 | 7.6003 | 12.0285 | -1.1179 |
| CHB | GOLGA8G | 28359611 | 3.724  | 8.4708  | -1.6617 |
| CHB | GOLGA8G | 28364611 | 3.6362 | 10.3343 | -1.9497 |
| CHB | GOLGA8G | 28369611 | 3.5568 | 9.9955  | -1.9334 |
| CHB | GOLGA8G | 28374611 | 3.3429 | 8.1319  | -1.7407 |
| CHB | GOLGA8G | 28379611 | 6.7179 | 11.6896 | -1.2893 |
| CHB | GOLGA8G | 28384611 | 5.4386 | 9.6567  | -1.3079 |
| CHB | GOLGA8G | 28389611 | 1.8496 | 8.1319  | -2.2835 |
| CHB | GOLGA8G | 28394611 | 4.3467 | 11.8591 | -1.922  |
| CHB | GOLGA8G | 28399611 | 5.6691 | 10.6731 | -1.4133 |
| CHB | GOLGA8G | 28404611 | 3.4344 | 10.1649 | -1.9896 |
| CHB | GOLGA8G | 28409611 | 2.2795 | 8.8096  | -2.2047 |
| CHB | GOLGA8G | 28414611 | 8.0253 | 12.1979 | -1.0396 |
| CHB | GOLGA8G | 28419611 | 8.4072 | 13.7226 | -1.1847 |
| CHB | GOLGA8G | 28424611 | 4.743  | 9.8261  | -1.5509 |
| CHB | GOLGA8G | 28429611 | 4.0805 | 8.979   | -1.625  |
| CHB | GOLGA8G | 28434611 | 3.8763 | 9.6567  | -1.7924 |
| CHB | GOLGA8G | 28439611 | 4.1769 | 9.9955  | -1.7472 |
| CHB | GOLGA8G | 28444611 | 2.7038 | 8.8096  | -2.0615 |
| CHB | GOLGA8G | 28449611 | 4.5347 | 8.979   | -1.4743 |
| CHB | GOLGA8G | 28454611 | 6.7855 | 9.4872  | -0.8516 |
| CHB | GOLGA8G | 28459611 | 6.9029 | 10.8426 | -1.0964 |
| CHB | GOLGA8G | 28464611 | 6.3082 | 10.8426 | -1.2619 |
| CHB | GOLGA8G | 28469611 | 7.5964 | 10.3343 | -0.797  |
| CHB | GOLGA8G | 28474611 | 8.0999 | 9.1484  | -0.3419 |
| CHB | GOLGA8G | 28479611 | 7.4986 | 9.9955  | -0.7498 |
| CHB | GOLGA8G | 28484611 | 7.3076 | 11.1814 | -1.0474 |
| CHB | GOLGA8G | 28489611 | 4.5159 | 6.946   | -1.0201 |
| CHB | GOLGA8G | 28494611 | 5.0824 | 8.3013  | -1.148  |
| CHB | GOLGA8G | 28499611 | 6.3765 | 8.4708  | -0.7332 |
| CHB | GOLGA8G | 28504611 | 6.2056 | 5.7601  | 0.2213  |
| CHB | GOLGA8G | 28509611 | 5.4062 | 7.4543  | -0.8062 |
| CHB | GOLGA8G | 28514611 | 4.1047 | 7.4543  | -1.3185 |
| CHB | GOLGA8G | 28519611 | 4.1776 | 6.6072  | -1.0671 |
| CHB | GOLGA8G | 28524611 | 3.5926 | 7.1154  | -1.4467 |

## 2\_TajimasD\_data

|     |         |          |        |         |         |
|-----|---------|----------|--------|---------|---------|
| CHB | GOLGA8G | 28529611 | 5.3992 | 9.1484  | -1.2224 |
| CHB | GOLGA8G | 28534611 | 8.1856 | 12.3673 | -1.0284 |
| CHB | GOLGA8G | 28539611 | 8.1668 | 11.6896 | -0.9136 |
| CHB | GOLGA8G | 28544611 | 6.7708 | 9.8261  | -0.9322 |
| CHB | GOLGA8G | 28549611 | 4.5365 | 8.4708  | -1.3773 |
| CHB | GOLGA8G | 28554611 | 2.6809 | 7.4543  | -1.8789 |
| CHB | GOLGA8G | 28559611 | 4.8131 | 9.6567  | -1.5019 |
| CHB | GOLGA8G | 28564611 | 7.1519 | 8.1319  | -0.3562 |
| CHB | GOLGA8G | 28569611 | 4.193  | 2.8801  | 1.1837  |
| CHB | GOLGA8G | 28574611 | 1.9039 | 1.6942  | 0.2878  |
| CHB | GOLGA8G | 28579611 | 0.9855 | 1.1859  | -0.3577 |
| CHB | GOLGA8G | 28584611 | 0.0484 | 0.5082  | -1.4434 |
| CHB | GOLGA8G | 28589611 | 0.0386 | 0.3388  | -1.2042 |
| CHB | GOLGA8G | 28594611 | 0.2781 | 0.1694  | 0.6459  |
| CHB | GOLGA8G | 28599611 | 0.2781 | 0.1694  | 0.6459  |
| CHB | GOLGA8G | 28604611 | 0.5195 | 0.3388  | 0.7248  |
| CHB | GOLGA8G | 28609611 | 1.9659 | 1.3553  | 0.9896  |
| CHB | GOLGA8G | 28614611 | 3.312  | 2.7106  | 0.5699  |
| CHB | GOLGA8G | 28619611 | 2.2859 | 2.2024  | 0.0935  |
| CHB | GOLGA8G | 28624611 | 0.752  | 0.8471  | -0.2144 |
| CHB | GOLGA8G | 28629611 | 2.9431 | 3.2189  | -0.2267 |
| CHB | GOLGA8G | 28634611 | 2.6115 | 2.8801  | -0.2422 |
| CHB | GOLGA8G | 28639611 | 0.335  | 0.3388  | -0.0152 |
| CHB | GOLGA8G | 28644611 | 1.396  | 2.2024  | -0.903  |
| CHB | GOLGA8G | 28649611 | 1.8528 | 3.2189  | -1.1231 |
| CHB | GOLGA8G | 28654611 | 0.7919 | 1.5247  | -1.0887 |
| CHB | GOLGA8G | 28659611 | 0.9629 | 2.3718  | -1.4872 |
| CHB | GOLGA8G | 28664611 | 1.0015 | 2.7106  | -1.6195 |
| CHB | GOLGA8G | 28669611 | 0.1887 | 1.0165  | -1.6474 |
| CHB | GOLGA8G | 28674611 | 3.0775 | 2.3718  | 0.7449  |
| CHB | GOLGA8G | 28679611 | 2.9566 | 2.2024  | 0.8445  |
| CHB | GOLGA8G | 28684611 | 0.3874 | 1.8636  | -1.8834 |
| CHB | GOLGA8G | 28689611 | 0.3969 | 2.033   | -1.9511 |
| CHB | GOLGA8G | 28694611 | 1.2519 | 1.8636  | -0.7804 |
| CHB | GOLGA8G | 28699611 | 5.248  | 6.7766  | -0.6562 |
| CHB | GOLGA8G | 28704611 | 9.4032 | 10.3343 | -0.271  |
| CHB | GOLGA8G | 28709611 | 6.3478 | 5.5907  | 0.3863  |
| CHB | GOLGA8G | 28714611 | 0.9989 | 1.0165  | -0.035  |
| CHB | GOLGA8G | 28719611 | 0.1321 | 0.8471  | -1.6123 |
| CHB | GOLGA8G | 28724611 | 0.189  | 1.0165  | -1.6468 |
| CHB | GOLGA8G | 28729611 | 1.3628 | 1.3553  | 0.0122  |
| CHB | GOLGA8G | 28734611 | 1.8146 | 1.5247  | 0.4307  |
| CHB | GOLGA8G | 28739611 | 1.3526 | 1.8636  | -0.652  |
| CHB | GOLGA8G | 28744611 | 1.4019 | 1.6942  | -0.4011 |
| CHB | GOLGA8G | 28749611 | 1.5899 | 1.3553  | 0.3802  |
| CHB | GOLGA8G | 28754611 | 1.6893 | 1.5247  | 0.2445  |
| CHB | GOLGA8G | 28759611 | 0.913  | 1.0165  | -0.206  |
| CHB | GOLGA8G | 28764611 | 0.8555 | 1.5247  | -0.9942 |
| CHB | GOLGA8G | 28769611 | 1.0202 | 1.8636  | -1.0761 |



## 2\_TajimasD\_data

|     |         |          |         |         |         |
|-----|---------|----------|---------|---------|---------|
| CHB | GOLGA8G | 28774611 | 0.43    | 1.0165  | -1.1672 |
| CHB | GOLGA8G | 28779611 | 1.2817  | 1.1859  | 0.171   |
| CHB | GOLGA8G | 28784611 | 1.5998  | 1.5247  | 0.1116  |
| CHB | GOLGA8G | 28789611 | 0.3569  | 0.8471  | -1.1054 |
| CHB | GOLGA8G | 28794611 | 0.1601  | 0.5082  | -1.0927 |
| CHB | GOLGA8G | 28799611 | 0.47    | 0.6777  | -0.543  |
| CHB | GOLGA8G | 28804611 | 0.75    | 0.5082  | 0.759   |
| CHB | GOLGA8G | 28809611 | 2.5315  | 2.7106  | -0.1697 |
| CHB | GOLGA8G | 28814611 | 2.1205  | 2.8801  | -0.6849 |
| CHB | GOLGA8G | 28819611 | 0.0194  | 0.3388  | -1.2812 |
| CHB | GOLGA8G | 28824611 | 0       | 0       | 0       |
| CHB | GOLGA8G | 28829611 | 1.0478  | 0.6777  | 0.9676  |
| CHB | GOLGA8G | 28834611 | 1.7775  | 1.8636  | -0.1099 |
| CHB | GOLGA8G | 28839611 | 0.9181  | 1.6942  | -1.0651 |
| CHB | GOLGA8G | 28844611 | 0.2267  | 0.8471  | -1.399  |
| CHB | GOLGA8G | 28849611 | 0.2283  | 0.8471  | -1.3954 |
| CHB | GOLGA8G | 28854611 | 2.5376  | 2.033   | 0.6017  |
| CHB | GOLGA8G | 28859611 | 2.3573  | 1.6942  | 0.91    |
| CHB | GOLGA8G | 28864611 | 0.534   | 0.6777  | -0.3757 |
| CHB | GOLGA8G | 28869611 | 0.8167  | 1.1859  | -0.659  |
| CHB | GOLGA8G | 28874611 | 2.11    | 2.7106  | -0.5691 |
| CHB | GOLGA8G | 28879611 | 1.8176  | 2.033   | -0.2569 |
| CHB | GOLGA8G | 28884611 | 1.031   | 1.3553  | -0.5256 |
| CHB | GOLGA8G | 28889611 | 1.9718  | 1.8636  | 0.138   |
| CHB | GOLGA8G | 28894611 | 6.4677  | 4.5742  | 1.153   |
| CHB | GOLGA8G | 28899611 | 10.7362 | 8.1319  | 0.9466  |
| CHB | GOLGA8G | 28904611 | 5.2092  | 4.066   | 0.7709  |
| CHB | GOLGA8G | 28909611 | 2.3922  | 2.3718  | 0.0215  |
| CHB | GOLGA8G | 28914611 | 3.4605  | 3.5577  | -0.0735 |
| CHB | GOLGA8G | 28919611 | 5.1028  | 3.8965  | 0.8437  |
| CHB | GOLGA8G | 28924611 | 10.5254 | 6.0989  | 2.0895  |
| CHB | GOLGA8G | 28929611 | 11.5365 | 7.6237  | 1.5089  |
| CHB | GOLGA8G | 28934611 | 8.5814  | 7.7931  | 0.2979  |
| CHB | GOLGA8G | 28939611 | 9.3678  | 8.8096  | 0.1885  |
| CHB | GOLGA8G | 28944611 | 18.4466 | 14.2309 | 0.9077  |
| CHB | GOLGA8G | 28949611 | 15.7004 | 11.3508 | 1.1596  |
| CHB | GOLGA8G | 28954611 | 9.8058  | 7.6237  | 0.8415  |
| CHB | GOLGA8G | 28959611 | 15.5523 | 12.7061 | 0.6823  |
| CHB | GOLGA8G | 28964611 | 15.0775 | 13.5532 | 0.3438  |
| CHB | GOLGA8G | 28969611 | 13.0131 | 12.8755 | 0.0326  |
| CHB | GOLGA8G | 28974611 | 14.7032 | 12.5367 | 0.526   |
| CHB | GOLGA8G | 28979611 | 15.7674 | 12.8755 | 0.6846  |
| CHB | GOLGA8G | 28984611 | 18.7933 | 14.7391 | 0.8443  |
| CHB | GOLGA8G | 28989611 | 17.8791 | 16.4333 | 0.2714  |
| CHB | GOLGA8G | 28994611 | 10.3151 | 11.6896 | -0.3565 |
| CHB | GOLGA8G | 28999611 | 3.6406  | 3.7271  | -0.0628 |
| CHB | GOLGA8G | 29004611 | 0.2433  | 0.8471  | -1.3616 |
| CHB | GOLGA8G | 29009611 | 0       | 0       | 0       |
| CHB | GOLGA8G | 29014611 | 0       | 0       | 0       |

## 2\_TajimasD\_data

|     |         |          |         |         |         |
|-----|---------|----------|---------|---------|---------|
| CHB | GOLGA8G | 29019611 | 0       | 0       | 0       |
| CHB | GOLGA8G | 29024611 | 0       | 0       | 0       |
| YRI | GOLGA8G | 28024611 | 8.2439  | 11.2602 | -0.8075 |
| YRI | GOLGA8G | 28029611 | 6.1905  | 9.9157  | -1.1232 |
| YRI | GOLGA8G | 28034611 | 8.143   | 14.7895 | -1.375  |
| YRI | GOLGA8G | 28039611 | 12.6879 | 17.6465 | -0.8665 |
| YRI | GOLGA8G | 28044611 | 15.2356 | 15.4617 | -0.0448 |
| YRI | GOLGA8G | 28049611 | 16.1171 | 15.1256 | 0.2008  |
| YRI | GOLGA8G | 28054611 | 14.6027 | 14.1172 | 0.105   |
| YRI | GOLGA8G | 28059611 | 13.3168 | 13.2769 | 0.0091  |
| YRI | GOLGA8G | 28064611 | 21.7807 | 18.3188 | 0.5836  |
| YRI | GOLGA8G | 28069611 | 31.6585 | 21.0078 | 1.5737  |
| YRI | GOLGA8G | 28074611 | 24.0741 | 18.823  | 0.8625  |
| YRI | GOLGA8G | 28079611 | 15.479  | 16.9743 | -0.2712 |
| YRI | GOLGA8G | 28084611 | 14.3731 | 16.8062 | -0.4455 |
| YRI | GOLGA8G | 28089611 | 16.689  | 19.9994 | -0.5129 |
| YRI | GOLGA8G | 28094611 | 17.5426 | 17.9827 | -0.0755 |
| YRI | GOLGA8G | 28099611 | 11.7363 | 12.6047 | -0.209  |
| YRI | GOLGA8G | 28104611 | 10.4316 | 12.6047 | -0.5231 |
| YRI | GOLGA8G | 28109611 | 9.9921  | 14.4534 | -0.9433 |
| YRI | GOLGA8G | 28114611 | 13.6154 | 21.68   | -1.1559 |
| YRI | GOLGA8G | 28119611 | 15.8069 | 23.5287 | -1.0225 |
| YRI | GOLGA8G | 28124611 | 12.2851 | 19.3272 | -1.1276 |
| YRI | GOLGA8G | 28129611 | 12.34   | 17.6465 | -0.9273 |
| YRI | GOLGA8G | 28134611 | 14.1166 | 17.8146 | -0.6404 |
| YRI | GOLGA8G | 28139611 | 14.6451 | 18.6549 | -0.6643 |
| YRI | GOLGA8G | 28144611 | 21.1539 | 19.3272 | 0.2925  |
| YRI | GOLGA8G | 28149611 | 26.1341 | 18.3188 | 1.3176  |
| YRI | GOLGA8G | 28154611 | 28.0474 | 17.6465 | 1.8175  |
| YRI | GOLGA8G | 28159611 | 26.9313 | 17.3104 | 1.7125  |
| YRI | GOLGA8G | 28164611 | 20.6151 | 14.9575 | 1.1579  |
| YRI | GOLGA8G | 28169611 | 19.7284 | 15.1256 | 0.932   |
| YRI | GOLGA8G | 28174611 | 17.9946 | 16.302  | 0.3191  |
| YRI | GOLGA8G | 28179611 | 15.655  | 15.9659 | -0.0598 |
| YRI | GOLGA8G | 28184611 | 13.3218 | 14.1172 | -0.172  |
| YRI | GOLGA8G | 28189611 | 7.4448  | 13.9492 | -1.4225 |
| YRI | GOLGA8G | 28194611 | 6.7657  | 16.8062 | -1.8385 |
| YRI | GOLGA8G | 28199611 | 8.2046  | 16.9743 | -1.5906 |
| YRI | GOLGA8G | 28204611 | 7.7757  | 13.2769 | -1.2608 |
| YRI | GOLGA8G | 28209611 | 7.9708  | 10.4199 | -0.705  |
| YRI | GOLGA8G | 28214611 | 8.9759  | 12.1005 | -0.7817 |
| YRI | GOLGA8G | 28219611 | 11.2629 | 14.2853 | -0.6462 |
| YRI | GOLGA8G | 28224611 | 10.7568 | 13.2769 | -0.5776 |
| YRI | GOLGA8G | 28229611 | 10.4973 | 12.7727 | -0.5409 |
| YRI | GOLGA8G | 28234611 | 11.1659 | 15.1256 | -0.8018 |
| YRI | GOLGA8G | 28239611 | 14.25   | 17.4785 | -0.5694 |
| YRI | GOLGA8G | 28244611 | 14.1139 | 16.302  | -0.4125 |
| YRI | GOLGA8G | 28249611 | 8.6611  | 16.6382 | -1.4748 |
| YRI | GOLGA8G | 28254611 | 7.3941  | 18.3188 | -1.8418 |

## 2\_TajimasD\_data

|     |         |          |         |         |         |
|-----|---------|----------|---------|---------|---------|
| YRI | GOLGA8G | 28259611 | 6.9091  | 17.3104 | -1.8514 |
| YRI | GOLGA8G | 28264611 | 6.2026  | 12.4366 | -1.5198 |
| YRI | GOLGA8G | 28269611 | 6.7114  | 12.7727 | -1.441  |
| YRI | GOLGA8G | 28274611 | 8.9613  | 13.7811 | -1.0663 |
| YRI | GOLGA8G | 28279611 | 11.8417 | 13.445  | -0.3631 |
| YRI | GOLGA8G | 28284611 | 11.6209 | 15.2937 | -0.7359 |
| YRI | GOLGA8G | 28289611 | 11.5347 | 12.9408 | -0.3302 |
| YRI | GOLGA8G | 28294611 | 14.4174 | 15.1256 | -0.1434 |
| YRI | GOLGA8G | 28299611 | 17.9262 | 18.6549 | -0.1207 |
| YRI | GOLGA8G | 28304611 | 15.9283 | 16.9743 | -0.1897 |
| YRI | GOLGA8G | 28309611 | 11.0211 | 14.6214 | -0.7529 |
| YRI | GOLGA8G | 28314611 | 9.9617  | 11.9324 | -0.4996 |
| YRI | GOLGA8G | 28319611 | 12.3136 | 12.7727 | -0.1091 |
| YRI | GOLGA8G | 28324611 | 12.7373 | 16.9743 | -0.7685 |
| YRI | GOLGA8G | 28329611 | 10.6084 | 15.6298 | -0.9855 |
| YRI | GOLGA8G | 28334611 | 10.443  | 12.4366 | -0.486  |
| YRI | GOLGA8G | 28339611 | 9.6046  | 10.756  | -0.3218 |
| YRI | GOLGA8G | 28344611 | 11.2487 | 11.7644 | -0.1325 |
| YRI | GOLGA8G | 28349611 | 20.2959 | 21.3439 | -0.1525 |
| YRI | GOLGA8G | 28354611 | 18.0652 | 21.8481 | -0.5382 |
| YRI | GOLGA8G | 28359611 | 11.4657 | 16.4701 | -0.9342 |
| YRI | GOLGA8G | 28364611 | 12.8076 | 15.7978 | -0.5809 |
| YRI | GOLGA8G | 28369611 | 11.9924 | 13.7811 | -0.3957 |
| YRI | GOLGA8G | 28374611 | 10.6674 | 11.2602 | -0.1587 |
| YRI | GOLGA8G | 28379611 | 16.8723 | 15.6298 | 0.2439  |
| YRI | GOLGA8G | 28384611 | 15.1791 | 17.3104 | -0.3794 |
| YRI | GOLGA8G | 28389611 | 9.3897  | 15.1256 | -1.1615 |
| YRI | GOLGA8G | 28394611 | 11.1827 | 17.9827 | -1.167  |
| YRI | GOLGA8G | 28399611 | 12.4234 | 16.4701 | -0.7554 |
| YRI | GOLGA8G | 28404611 | 11.1886 | 15.6298 | -0.8716 |
| YRI | GOLGA8G | 28409611 | 7.8491  | 14.9575 | -1.4548 |
| YRI | GOLGA8G | 28414611 | 14.8718 | 18.4868 | -0.6041 |
| YRI | GOLGA8G | 28419611 | 15.4781 | 16.9743 | -0.2714 |
| YRI | GOLGA8G | 28424611 | 9.5641  | 10.924  | -0.3745 |
| YRI | GOLGA8G | 28429611 | 10.6742 | 14.1172 | -0.7445 |
| YRI | GOLGA8G | 28434611 | 13.6242 | 15.6298 | -0.3936 |
| YRI | GOLGA8G | 28439611 | 15.0176 | 14.2853 | 0.1566  |
| YRI | GOLGA8G | 28444611 | 12.1738 | 14.4534 | -0.482  |
| YRI | GOLGA8G | 28449611 | 13.0015 | 16.9743 | -0.7206 |
| YRI | GOLGA8G | 28454611 | 12.1505 | 19.1591 | -1.1317 |
| YRI | GOLGA8G | 28459611 | 14.4058 | 20.8397 | -0.9581 |
| YRI | GOLGA8G | 28464611 | 14.4668 | 17.9827 | -0.6034 |
| YRI | GOLGA8G | 28469611 | 11.3188 | 16.134  | -0.9168 |
| YRI | GOLGA8G | 28474611 | 9.8371  | 14.2853 | -0.9511 |
| YRI | GOLGA8G | 28479611 | 8.9534  | 13.445  | -1.0172 |
| YRI | GOLGA8G | 28484611 | 10.4621 | 16.134  | -1.0799 |
| YRI | GOLGA8G | 28489611 | 7.7905  | 12.9408 | -1.2094 |
| YRI | GOLGA8G | 28494611 | 9.8283  | 13.613  | -0.8471 |
| YRI | GOLGA8G | 28499611 | 9.1207  | 13.2769 | -0.9525 |

## 2\_TajimasD\_data

|     |         |          |         |         |         |
|-----|---------|----------|---------|---------|---------|
| YRI | GOLGA8G | 28504611 | 6.8705  | 9.9157  | -0.9181 |
| YRI | GOLGA8G | 28509611 | 6.9677  | 11.9324 | -1.2585 |
| YRI | GOLGA8G | 28514611 | 6.2097  | 13.1089 | -1.6004 |
| YRI | GOLGA8G | 28519611 | 6.7131  | 11.5963 | -1.2716 |
| YRI | GOLGA8G | 28524611 | 7.6688  | 14.2853 | -1.4147 |
| YRI | GOLGA8G | 28529611 | 10.2301 | 17.1423 | -1.2419 |
| YRI | GOLGA8G | 28534611 | 11.5826 | 20.1675 | -1.3194 |
| YRI | GOLGA8G | 28539611 | 9.8562  | 18.6549 | -1.4577 |
| YRI | GOLGA8G | 28544611 | 10.806  | 16.302  | -1.0361 |
| YRI | GOLGA8G | 28549611 | 11.0356 | 16.8062 | -1.0566 |
| YRI | GOLGA8G | 28554611 | 8.8787  | 15.2937 | -1.2854 |
| YRI | GOLGA8G | 28559611 | 11.7101 | 19.3272 | -1.2197 |
| YRI | GOLGA8G | 28564611 | 9.5991  | 15.6298 | -1.1836 |
| YRI | GOLGA8G | 28569611 | 2.9752  | 5.7141  | -1.3658 |
| YRI | GOLGA8G | 28574611 | 1.9253  | 3.0251  | -0.9488 |
| YRI | GOLGA8G | 28579611 | 1.237   | 1.8487  | -0.7824 |
| YRI | GOLGA8G | 28584611 | 0.1006  | 0.8403  | -1.6707 |
| YRI | GOLGA8G | 28589611 | 0.0914  | 0.6722  | -1.5205 |
| YRI | GOLGA8G | 28594611 | 0.1552  | 0.3361  | -0.7262 |
| YRI | GOLGA8G | 28599611 | 0.1552  | 0.3361  | -0.7262 |
| YRI | GOLGA8G | 28604611 | 0.4844  | 0.3361  | 0.5954  |
| YRI | GOLGA8G | 28609611 | 1.9509  | 1.6806  | 0.3719  |
| YRI | GOLGA8G | 28614611 | 2.8744  | 2.689   | 0.1762  |
| YRI | GOLGA8G | 28619611 | 1.6427  | 2.3529  | -0.7518 |
| YRI | GOLGA8G | 28624611 | 0.615   | 2.0167  | -1.6759 |
| YRI | GOLGA8G | 28629611 | 3.7901  | 4.8738  | -0.6221 |
| YRI | GOLGA8G | 28634611 | 3.4099  | 3.8654  | -0.3197 |
| YRI | GOLGA8G | 28639611 | 1.0202  | 0.6722  | 0.911   |
| YRI | GOLGA8G | 28644611 | 2.5485  | 3.8654  | -0.9241 |
| YRI | GOLGA8G | 28649611 | 2.8216  | 4.7057  | -1.1153 |
| YRI | GOLGA8G | 28654611 | 1.3572  | 1.8487  | -0.6287 |
| YRI | GOLGA8G | 28659611 | 2.9335  | 4.0335  | -0.7443 |
| YRI | GOLGA8G | 28664611 | 3.2523  | 4.3696  | -0.7055 |
| YRI | GOLGA8G | 28669611 | 1.2553  | 1.8487  | -0.759  |
| YRI | GOLGA8G | 28674611 | 4.9193  | 4.2016  | 0.4688  |
| YRI | GOLGA8G | 28679611 | 4.3241  | 3.8654  | 0.3219  |
| YRI | GOLGA8G | 28684611 | 2.3924  | 3.0251  | -0.5458 |
| YRI | GOLGA8G | 28689611 | 2.6739  | 3.3612  | -0.543  |
| YRI | GOLGA8G | 28694611 | 2.4895  | 3.5293  | -0.7884 |
| YRI | GOLGA8G | 28699611 | 7.8609  | 10.4199 | -0.7367 |
| YRI | GOLGA8G | 28704611 | 10.8011 | 15.1256 | -0.8757 |
| YRI | GOLGA8G | 28709611 | 6.2005  | 8.9073  | -0.9015 |
| YRI | GOLGA8G | 28714611 | 1.7367  | 3.8654  | -1.4938 |
| YRI | GOLGA8G | 28719611 | 0.5408  | 2.5209  | -1.983  |
| YRI | GOLGA8G | 28724611 | 0.3982  | 1.0084  | -1.2165 |
| YRI | GOLGA8G | 28729611 | 1.0891  | 2.5209  | -1.4339 |
| YRI | GOLGA8G | 28734611 | 1.5172  | 5.0419  | -1.9639 |
| YRI | GOLGA8G | 28739611 | 2.7995  | 5.378   | -1.357  |
| YRI | GOLGA8G | 28744611 | 3.515   | 3.3612  | 0.1215  |

## 2\_TajimasD\_data

|     |         |          |         |         |         |
|-----|---------|----------|---------|---------|---------|
| YRI | GOLGA8G | 28749611 | 2.239   | 2.1848  | 0.0609  |
| YRI | GOLGA8G | 28754611 | 1.7779  | 2.689   | -0.8659 |
| YRI | GOLGA8G | 28759611 | 1.4555  | 2.8571  | -1.2675 |
| YRI | GOLGA8G | 28764611 | 2.0922  | 3.8654  | -1.2444 |
| YRI | GOLGA8G | 28769611 | 1.7364  | 3.0251  | -1.1117 |
| YRI | GOLGA8G | 28774611 | 0.3525  | 1.6806  | -1.8271 |
| YRI | GOLGA8G | 28779611 | 1.6552  | 2.689   | -0.9825 |
| YRI | GOLGA8G | 28784611 | 2.0791  | 2.5209  | -0.4424 |
| YRI | GOLGA8G | 28789611 | 0.7845  | 1.1764  | -0.7009 |
| YRI | GOLGA8G | 28794611 | 0.1976  | 0.5042  | -0.9635 |
| YRI | GOLGA8G | 28799611 | 0.5381  | 0.6722  | -0.3511 |
| YRI | GOLGA8G | 28804611 | 0.6815  | 0.8403  | -0.3587 |
| YRI | GOLGA8G | 28809611 | 2.2614  | 2.5209  | -0.2599 |
| YRI | GOLGA8G | 28814611 | 2.1444  | 2.3529  | -0.2207 |
| YRI | GOLGA8G | 28819611 | 0.0631  | 0.3361  | -1.096  |
| YRI | GOLGA8G | 28824611 | 0.1804  | 0.5042  | -1.0176 |
| YRI | GOLGA8G | 28829611 | 1.5364  | 1.1764  | 0.6439  |
| YRI | GOLGA8G | 28834611 | 2.9061  | 3.0251  | -0.1027 |
| YRI | GOLGA8G | 28839611 | 1.7593  | 4.0335  | -1.5388 |
| YRI | GOLGA8G | 28844611 | 0.8347  | 3.0251  | -1.8896 |
| YRI | GOLGA8G | 28849611 | 1.0355  | 2.689   | -1.5714 |
| YRI | GOLGA8G | 28854611 | 3.1376  | 3.5293  | -0.297  |
| YRI | GOLGA8G | 28859611 | 2.7369  | 2.3529  | 0.4065  |
| YRI | GOLGA8G | 28864611 | 0.2082  | 0.8403  | -1.4277 |
| YRI | GOLGA8G | 28869611 | 0.2816  | 1.5126  | -1.833  |
| YRI | GOLGA8G | 28874611 | 2.1107  | 4.5377  | -1.483  |
| YRI | GOLGA8G | 28879611 | 2.0738  | 4.0335  | -1.326  |
| YRI | GOLGA8G | 28884611 | 0.9711  | 2.3529  | -1.4627 |
| YRI | GOLGA8G | 28889611 | 1.6956  | 3.0251  | -1.1469 |
| YRI | GOLGA8G | 28894611 | 6.1465  | 5.7141  | 0.2156  |
| YRI | GOLGA8G | 28899611 | 11.3305 | 11.2602 | 0.0188  |
| YRI | GOLGA8G | 28904611 | 5.9542  | 6.5544  | -0.2646 |
| YRI | GOLGA8G | 28909611 | 1.9708  | 4.2016  | -1.4572 |
| YRI | GOLGA8G | 28914611 | 3.3798  | 7.0586  | -1.5166 |
| YRI | GOLGA8G | 28919611 | 7.1155  | 9.2434  | -0.6848 |
| YRI | GOLGA8G | 28924611 | 10.2312 | 10.924  | -0.1908 |
| YRI | GOLGA8G | 28929611 | 10.2301 | 10.924  | -0.1911 |
| YRI | GOLGA8G | 28934611 | 10.3073 | 14.7895 | -0.9272 |
| YRI | GOLGA8G | 28939611 | 13.321  | 18.6549 | -0.8837 |
| YRI | GOLGA8G | 28944611 | 19.9282 | 22.3523 | -0.3373 |
| YRI | GOLGA8G | 28949611 | 15.9817 | 17.9827 | -0.3434 |
| YRI | GOLGA8G | 28954611 | 12.2082 | 14.6214 | -0.5047 |
| YRI | GOLGA8G | 28959611 | 15.3474 | 19.8313 | -0.7004 |
| YRI | GOLGA8G | 28964611 | 13.7523 | 17.9827 | -0.726  |
| YRI | GOLGA8G | 28969611 | 12.5313 | 13.9492 | -0.3101 |
| YRI | GOLGA8G | 28974611 | 11.7304 | 14.4534 | -0.5758 |
| YRI | GOLGA8G | 28979611 | 11.9665 | 17.6465 | -0.9926 |
| YRI | GOLGA8G | 28984611 | 14.6183 | 19.4952 | -0.7744 |
| YRI | GOLGA8G | 28989611 | 16.6192 | 20.1675 | -0.5453 |

## 2\_TajimasD\_data

|     |         |           |         |         |         |
|-----|---------|-----------|---------|---------|---------|
| YRI | GOLGA8G | 28994611  | 12.6134 | 15.7978 | -0.6186 |
| YRI | GOLGA8G | 28999611  | 4.7177  | 5.7141  | -0.4969 |
| YRI | GOLGA8G | 29004611  | 1.0322  | 0.8403  | 0.4334  |
| YRI | GOLGA8G | 29009611  | 0       | 0       | 0       |
| YRI | GOLGA8G | 29014611  | 0       | 0       | 0       |
| YRI | GOLGA8G | 29019611  | 0       | 0       | 0       |
| YRI | GOLGA8G | 29024611  | 0       | 0       | 0       |
| CEU | HIST2   | 143407386 | 2.4331  | 3.7524  | -0.9558 |
| CEU | HIST2   | 143412386 | 3.7633  | 4.9463  | -0.6747 |
| CEU | HIST2   | 143417386 | 3.7411  | 4.2641  | -0.3395 |
| CEU | HIST2   | 143422386 | 3.663   | 3.7524  | -0.0648 |
| CEU | HIST2   | 143427386 | 2.4238  | 3.2407  | -0.6698 |
| CEU | HIST2   | 143432386 | 0.0503  | 0.6822  | -1.6501 |
| CEU | HIST2   | 143437386 | 1.4853  | 1.1939  | 0.5193  |
| CEU | HIST2   | 143442386 | 2.1128  | 2.3879  | -0.2897 |
| CEU | HIST2   | 143447386 | 1.6283  | 1.8762  | -0.3156 |
| CEU | HIST2   | 143452386 | 1.5395  | 1.1939  | 0.6159  |
| CEU | HIST2   | 143457386 | 1.2272  | 1.8762  | -0.8263 |
| CEU | HIST2   | 143462386 | 2.0583  | 4.2641  | -1.4319 |
| CEU | HIST2   | 143467386 | 3.4865  | 8.187   | -1.7029 |
| CEU | HIST2   | 143472386 | 4.2144  | 8.6987  | -1.5363 |
| CEU | HIST2   | 143477386 | 5.0787  | 6.4814  | -0.6287 |
| CEU | HIST2   | 143482386 | 3.8666  | 4.7757  | -0.5347 |
| CEU | HIST2   | 143487386 | 3.2115  | 5.458   | -1.1744 |
| CEU | HIST2   | 143492386 | 7.6314  | 10.2337 | -0.7667 |
| CEU | HIST2   | 143497386 | 10.6658 | 11.2571 | -0.1593 |
| CEU | HIST2   | 143502386 | 11.8762 | 9.3809  | 0.7972  |
| CEU | HIST2   | 143507386 | 11.0347 | 10.0632 | 0.2907  |
| CEU | HIST2   | 143512386 | 8.356   | 9.0398  | -0.2261 |
| CEU | HIST2   | 143517386 | 9.9101  | 10.0632 | -0.0458 |
| CEU | HIST2   | 143522386 | 11.5488 | 13.645  | -0.4711 |
| CEU | HIST2   | 143527386 | 9.5803  | 11.0866 | -0.4117 |
| CEU | HIST2   | 143532386 | 9.1175  | 7.1636  | 0.7998  |
| CEU | HIST2   | 143537386 | 14.3548 | 8.8692  | 1.8459  |
| CEU | HIST2   | 143542386 | 10.2931 | 7.8459  | 0.9219  |
| CEU | HIST2   | 143547386 | 0.9514  | 2.2173  | -1.4142 |
| CEU | HIST2   | 143552386 | 0       | 0       | 0       |
| CEU | HIST2   | 143557386 | 0       | 0       | 0       |
| CEU | HIST2   | 143562386 | 0       | 0       | 0       |
| CEU | HIST2   | 143567386 | 0       | 0       | 0       |
| CEU | HIST2   | 143572386 | 0       | 0       | 0       |
| CEU | HIST2   | 143577386 | 0       | 0       | 0       |
| CEU | HIST2   | 143582386 | 0       | 0       | 0       |
| CEU | HIST2   | 143587386 | 0       | 0       | 0       |
| CEU | HIST2   | 143592386 | 0       | 0       | 0       |
| CEU | HIST2   | 143597386 | 0       | 0       | 0       |
| CEU | HIST2   | 143602386 | 0       | 0       | 0       |
| CEU | HIST2   | 143607386 | 0       | 0       | 0       |
| CEU | HIST2   | 143612386 | 0       | 0       | 0       |

## 2\_TajimasD\_data

|     |       |           |        |        |         |
|-----|-------|-----------|--------|--------|---------|
| CEU | HIST2 | 143617386 | 0      | 0      | 0       |
| CEU | HIST2 | 143622386 | 0      | 0      | 0       |
| CEU | HIST2 | 143627386 | 0      | 0      | 0       |
| CEU | HIST2 | 143632386 | 0      | 0      | 0       |
| CEU | HIST2 | 143637386 | 0      | 0      | 0       |
| CEU | HIST2 | 143642386 | 0.3356 | 0.3411 | -0.022  |
| CEU | HIST2 | 143647386 | 0.3653 | 0.5117 | -0.4591 |
| CEU | HIST2 | 143652386 | 0.0297 | 0.1706 | -0.837  |
| CEU | HIST2 | 143657386 | 0.02   | 0.1706 | -0.8946 |
| CEU | HIST2 | 143662386 | 0.7778 | 2.2173 | -1.6082 |
| CEU | HIST2 | 143667386 | 1.0952 | 2.8996 | -1.6228 |
| CEU | HIST2 | 143672386 | 0.3375 | 0.8528 | -1.1604 |
| CEU | HIST2 | 143677386 | 0      | 0      | 0       |
| CEU | HIST2 | 143682386 | 0      | 0      | 0       |
| CEU | HIST2 | 143687386 | 0      | 0      | 0       |
| CEU | HIST2 | 143692386 | 0      | 0      | 0       |
| CEU | HIST2 | 143697386 | 0      | 0      | 0       |
| CEU | HIST2 | 143702386 | 0      | 0      | 0       |
| CEU | HIST2 | 143707386 | 0.7743 | 0.3411 | 1.7366  |
| CEU | HIST2 | 143712386 | 0.7743 | 0.3411 | 1.7366  |
| CEU | HIST2 | 143717386 | 0.5477 | 0.8528 | -0.6871 |
| CEU | HIST2 | 143722386 | 0.7312 | 1.0234 | -0.5806 |
| CEU | HIST2 | 143727386 | 0.7714 | 0.8528 | -0.1833 |
| CEU | HIST2 | 143732386 | 1.9887 | 2.2173 | -0.2554 |
| CEU | HIST2 | 143737386 | 1.4007 | 1.5351 | -0.1993 |
| CEU | HIST2 | 143742386 | 1.0812 | 1.3645 | -0.4583 |
| CEU | HIST2 | 143747386 | 1.4418 | 2.5584 | -1.1123 |
| CEU | HIST2 | 143752386 | 1.2538 | 2.729  | -1.3944 |
| CEU | HIST2 | 143757386 | 1.8984 | 4.2641 | -1.5357 |
| CEU | HIST2 | 143762386 | 3.7833 | 4.9463 | -0.6633 |
| CEU | HIST2 | 143767386 | 6.4071 | 5.9697 | 0.2111  |
| CEU | HIST2 | 143772386 | 3.6289 | 3.7524 | -0.0895 |
| CEU | HIST2 | 143777386 | 0      | 0      | 0       |
| CEU | HIST2 | 143782386 | 0      | 0      | 0       |
| CEU | HIST2 | 143787386 | 0      | 0      | 0       |
| CEU | HIST2 | 143792386 | 0      | 0      | 0       |
| CEU | HIST2 | 143797386 | 0      | 0      | 0       |
| CEU | HIST2 | 143802386 | 0      | 0      | 0       |
| CEU | HIST2 | 143807386 | 0      | 0      | 0       |
| CEU | HIST2 | 143812386 | 0      | 0      | 0       |
| CEU | HIST2 | 143817386 | 0      | 0      | 0       |
| CEU | HIST2 | 143822386 | 0      | 0      | 0       |
| CEU | HIST2 | 143827386 | 0      | 0      | 0       |
| CEU | HIST2 | 143832386 | 0      | 0      | 0       |
| CEU | HIST2 | 143837386 | 0      | 0      | 0       |
| CEU | HIST2 | 143842386 | 0      | 0      | 0       |
| CEU | HIST2 | 143847386 | 0      | 0      | 0       |
| CEU | HIST2 | 143852386 | 0      | 0      | 0       |
| CEU | HIST2 | 143857386 | 0      | 0      | 0       |

## 2\_TajimasD\_data

|     |       |           |        |        |         |
|-----|-------|-----------|--------|--------|---------|
| CEU | HIST2 | 143862386 | 0      | 0      | 0       |
| CEU | HIST2 | 143867386 | 0      | 0      | 0       |
| CEU | HIST2 | 143872386 | 0.0404 | 0.5117 | -1.4781 |
| CEU | HIST2 | 143877386 | 0.5564 | 1.1939 | -1.136  |
| CEU | HIST2 | 143882386 | 0.516  | 0.6822 | -0.434  |
| CEU | HIST2 | 143887386 | 0      | 0      | 0       |
| CEU | HIST2 | 143892386 | 0      | 0      | 0       |
| CEU | HIST2 | 143897386 | 0.2872 | 0.1706 | 0.6926  |
| CEU | HIST2 | 143902386 | 0.3863 | 0.8528 | -1.0505 |
| CEU | HIST2 | 143907386 | 0.1396 | 1.1939 | -1.8788 |
| CEU | HIST2 | 143912386 | 0.2756 | 1.1939 | -1.6364 |
| CEU | HIST2 | 143917386 | 0.3552 | 1.3645 | -1.6328 |
| CEU | HIST2 | 143922386 | 0.8202 | 2.2173 | -1.5608 |
| CEU | HIST2 | 143927386 | 1.7679 | 3.5818 | -1.3671 |
| CEU | HIST2 | 143932386 | 1.1758 | 2.5584 | -1.3773 |
| CEU | HIST2 | 143937386 | 1.1233 | 1.5351 | -0.6106 |
| CEU | HIST2 | 143942386 | 1.6102 | 2.2173 | -0.6782 |
| CEU | HIST2 | 143947386 | 0.8318 | 2.8996 | -1.8596 |
| CEU | HIST2 | 143952386 | 0.2569 | 2.0467 | -2.1297 |
| CEU | HIST2 | 143957386 | 0.0998 | 0.8528 | -1.6957 |
| CEU | HIST2 | 143962386 | 0.1301 | 1.1939 | -1.8957 |
| CEU | HIST2 | 143967386 | 0.6067 | 1.5351 | -1.3766 |
| CEU | HIST2 | 143972386 | 0.9157 | 1.7056 | -1.0819 |
| CEU | HIST2 | 143977386 | 0.3595 | 0.8528 | -1.1109 |
| CEU | HIST2 | 143982386 | 2.6096 | 2.2173 | 0.4383  |
| CEU | HIST2 | 143987386 | 3.1517 | 3.4112 | -0.2038 |
| CEU | HIST2 | 143992386 | 2.1581 | 2.5584 | -0.3988 |
| CEU | HIST2 | 143997386 | 3.0565 | 3.0701 | -0.0117 |
| CEU | HIST2 | 144002386 | 2.2981 | 3.7524 | -1.0536 |
| CEU | HIST2 | 144007386 | 5.9082 | 5.1169 | 0.438   |
| CEU | HIST2 | 144012386 | 7.453  | 7.3342 | 0.0476  |
| CEU | HIST2 | 144017386 | 3.7339 | 6.4814 | -1.2315 |
| CEU | HIST2 | 144022386 | 3.2667 | 3.7524 | -0.3519 |
| CEU | HIST2 | 144027386 | 3.8326 | 3.7524 | 0.0581  |
| CEU | HIST2 | 144032386 | 2.0272 | 3.7524 | -1.2499 |
| CEU | HIST2 | 144037386 | 0.3964 | 2.5584 | -2.1537 |
| CEU | HIST2 | 144042386 | 3.2672 | 3.9229 | -0.4573 |
| CEU | HIST2 | 144047386 | 4.2051 | 4.7757 | -0.3356 |
| CEU | HIST2 | 144052386 | 1.2948 | 2.8996 | -1.4432 |
| CEU | HIST2 | 144057386 | 0.3379 | 2.3879 | -2.1589 |
| CEU | HIST2 | 144062386 | 1.2641 | 2.8996 | -1.4709 |
| CEU | HIST2 | 144067386 | 2.0651 | 2.5584 | -0.4914 |
| CEU | HIST2 | 144072386 | 1.8499 | 1.7056 | 0.1976  |
| CEU | HIST2 | 144077386 | 0.9351 | 1.3645 | -0.6947 |
| CEU | HIST2 | 144082386 | 0.2637 | 1.7056 | -1.9749 |
| CEU | HIST2 | 144087386 | 0.1602 | 1.3645 | -1.9483 |
| CEU | HIST2 | 144092386 | 0.0808 | 0.8528 | -1.7385 |
| CEU | HIST2 | 144097386 | 0.0505 | 0.5117 | -1.4464 |
| CEU | HIST2 | 144102386 | 0      | 0      | 0       |



## 2\_TajimasD\_data

|     |       |           |        |        |         |
|-----|-------|-----------|--------|--------|---------|
| CEU | HIST2 | 144107386 | 0      | 0      | 0       |
| CEU | HIST2 | 144112386 | 0      | 0      | 0       |
| CEU | HIST2 | 144117386 | 0      | 0      | 0       |
| CEU | HIST2 | 144122386 | 0      | 0      | 0       |
| CEU | HIST2 | 144127386 | 0      | 0      | 0       |
| CEU | HIST2 | 144132386 | 0      | 0      | 0       |
| CEU | HIST2 | 144137386 | 0      | 0      | 0       |
| CEU | HIST2 | 144142386 | 0.02   | 0.1706 | -0.8946 |
| CEU | HIST2 | 144147386 | 0.02   | 0.1706 | -0.8946 |
| CEU | HIST2 | 144152386 | 0.0101 | 0.1706 | -0.9534 |
| CEU | HIST2 | 144157386 | 0.2325 | 1.0234 | -1.5716 |
| CEU | HIST2 | 144162386 | 0.2325 | 1.0234 | -1.5716 |
| CEU | HIST2 | 144167386 | 1.0183 | 0.6822 | 0.8777  |
| CEU | HIST2 | 144172386 | 1.0082 | 0.5117 | 1.5572  |
| CEU | HIST2 | 144177386 | 0.4945 | 0.1706 | 1.924   |
| CEU | HIST2 | 144182386 | 0.4945 | 0.1706 | 1.924   |
| CEU | HIST2 | 144187386 | 0      | 0      | 0       |
| CEU | HIST2 | 144192386 | 0      | 0      | 0       |
| CEU | HIST2 | 144197386 | 0.0594 | 0.3411 | -1.1293 |
| CEU | HIST2 | 144202386 | 0.0594 | 0.3411 | -1.1293 |
| CEU | HIST2 | 144207386 | 0      | 0      | 0       |
| CEU | HIST2 | 144212386 | 0      | 0      | 0       |
| CEU | HIST2 | 144217386 | 0.8332 | 1.1939 | -0.6428 |
| CEU | HIST2 | 144222386 | 0.8433 | 1.3645 | -0.8432 |
| CEU | HIST2 | 144227386 | 0.0101 | 0.1706 | -0.9534 |
| CEU | HIST2 | 144232386 | 0      | 0      | 0       |
| CEU | HIST2 | 144237386 | 0      | 0      | 0       |
| CEU | HIST2 | 144242386 | 0      | 0      | 0       |
| CEU | HIST2 | 144247386 | 0      | 0      | 0       |
| CEU | HIST2 | 144252386 | 0      | 0      | 0       |
| CEU | HIST2 | 144257386 | 0      | 0      | 0       |
| CEU | HIST2 | 144262386 | 0      | 0      | 0       |
| CEU | HIST2 | 144267386 | 0      | 0      | 0       |
| CEU | HIST2 | 144272386 | 0.4686 | 0.3411 | 0.5111  |
| CEU | HIST2 | 144277386 | 0.4686 | 0.3411 | 0.5111  |
| CEU | HIST2 | 144282386 | 0.4585 | 0.1706 | 1.7102  |
| CEU | HIST2 | 144287386 | 0.4585 | 0.1706 | 1.7102  |
| CEU | HIST2 | 144292386 | 0      | 0      | 0       |
| CEU | HIST2 | 144297386 | 0      | 0      | 0       |
| CEU | HIST2 | 144302386 | 1.4576 | 0.8528 | 1.362   |
| CEU | HIST2 | 144307386 | 1.4576 | 0.8528 | 1.362   |
| CEU | HIST2 | 144312386 | 0.0101 | 0.1706 | -0.9534 |
| CEU | HIST2 | 144317386 | 0.1977 | 0.8528 | -1.4753 |
| CEU | HIST2 | 144322386 | 0.2078 | 0.8528 | -1.4525 |
| CEU | HIST2 | 144327386 | 0.0505 | 0.6822 | -1.6496 |
| CEU | HIST2 | 144332386 | 0.0303 | 0.5117 | -1.5098 |
| CEU | HIST2 | 144337386 | 0.0202 | 0.3411 | -1.2864 |
| CEU | HIST2 | 144342386 | 0.0891 | 0.5117 | -1.3254 |
| CEU | HIST2 | 144347386 | 0.0689 | 0.1706 | -0.6041 |

## 2\_TajimasD\_data

|     |       |           |         |         |         |
|-----|-------|-----------|---------|---------|---------|
| CEU | HIST2 | 144352386 | 0       | 0       | 0       |
| CEU | HIST2 | 144357386 | 0       | 0       | 0       |
| CEU | HIST2 | 144362386 | 0.2591  | 0.5117  | -0.7922 |
| CEU | HIST2 | 144367386 | 0.2591  | 0.5117  | -0.7922 |
| CEU | HIST2 | 144372386 | 0       | 0       | 0       |
| CEU | HIST2 | 144377386 | 0       | 0       | 0       |
| CEU | HIST2 | 144382386 | 0       | 0       | 0       |
| CEU | HIST2 | 144387386 | 0       | 0       | 0       |
| CEU | HIST2 | 144392386 | 0       | 0       | 0       |
| CEU | HIST2 | 144397386 | 0       | 0       | 0       |
| CHB | HIST2 | 143407386 | 2.6196  | 4.4048  | -1.1233 |
| CHB | HIST2 | 143412386 | 4.1296  | 5.5907  | -0.7455 |
| CHB | HIST2 | 143417386 | 4.1038  | 5.2519  | -0.6192 |
| CHB | HIST2 | 143422386 | 3.767   | 4.913   | -0.6555 |
| CHB | HIST2 | 143427386 | 2.3015  | 3.0495  | -0.6433 |
| CHB | HIST2 | 143432386 | 0.0097  | 0.1694  | -0.949  |
| CHB | HIST2 | 143437386 | 1.6986  | 1.1859  | 0.9152  |
| CHB | HIST2 | 143442386 | 2.1795  | 2.2024  | -0.0256 |
| CHB | HIST2 | 143447386 | 1.4599  | 1.6942  | -0.3215 |
| CHB | HIST2 | 143452386 | 1.5696  | 1.6942  | -0.171  |
| CHB | HIST2 | 143457386 | 1.3255  | 3.0495  | -1.4826 |
| CHB | HIST2 | 143462386 | 1.9185  | 5.4213  | -1.8368 |
| CHB | HIST2 | 143467386 | 3.1673  | 7.6237  | -1.7185 |
| CHB | HIST2 | 143472386 | 3.8045  | 7.6237  | -1.4728 |
| CHB | HIST2 | 143477386 | 5.1051  | 8.1319  | -1.1002 |
| CHB | HIST2 | 143482386 | 4.5433  | 8.8096  | -1.4404 |
| CHB | HIST2 | 143487386 | 3.5443  | 7.7931  | -1.6058 |
| CHB | HIST2 | 143492386 | 7.6067  | 10.8426 | -0.9006 |
| CHB | HIST2 | 143497386 | 11.02   | 11.6896 | -0.1736 |
| CHB | HIST2 | 143502386 | 12.2582 | 9.6567  | 0.8067  |
| CHB | HIST2 | 143507386 | 10.0776 | 8.979   | 0.3644  |
| CHB | HIST2 | 143512386 | 7.1972  | 8.8096  | -0.5444 |
| CHB | HIST2 | 143517386 | 10.5547 | 11.1814 | -0.1695 |
| CHB | HIST2 | 143522386 | 10.9671 | 12.8755 | -0.4518 |
| CHB | HIST2 | 143527386 | 7.1736  | 10.1649 | -0.8843 |
| CHB | HIST2 | 143532386 | 7.0944  | 7.6237  | -0.2041 |
| CHB | HIST2 | 143537386 | 12.7493 | 10.8426 | 0.5306  |
| CHB | HIST2 | 143542386 | 9.7561  | 8.4708  | 0.4499  |
| CHB | HIST2 | 143547386 | 1.0192  | 1.6942  | -0.9264 |
| CHB | HIST2 | 143552386 | 0       | 0       | 0       |
| CHB | HIST2 | 143557386 | 0       | 0       | 0       |
| CHB | HIST2 | 143562386 | 0       | 0       | 0       |
| CHB | HIST2 | 143567386 | 0       | 0       | 0       |
| CHB | HIST2 | 143572386 | 0       | 0       | 0       |
| CHB | HIST2 | 143577386 | 0       | 0       | 0       |
| CHB | HIST2 | 143582386 | 0       | 0       | 0       |
| CHB | HIST2 | 143587386 | 0       | 0       | 0       |
| CHB | HIST2 | 143592386 | 0       | 0       | 0       |
| CHB | HIST2 | 143597386 | 0       | 0       | 0       |

## 2\_TajimasD\_data

|     |       |           |        |        |         |
|-----|-------|-----------|--------|--------|---------|
| CHB | HIST2 | 143602386 | 0      | 0      | 0       |
| CHB | HIST2 | 143607386 | 0      | 0      | 0       |
| CHB | HIST2 | 143612386 | 0      | 0      | 0       |
| CHB | HIST2 | 143617386 | 0      | 0      | 0       |
| CHB | HIST2 | 143622386 | 0      | 0      | 0       |
| CHB | HIST2 | 143627386 | 0      | 0      | 0       |
| CHB | HIST2 | 143632386 | 0      | 0      | 0       |
| CHB | HIST2 | 143637386 | 0      | 0      | 0       |
| CHB | HIST2 | 143642386 | 0      | 0      | 0       |
| CHB | HIST2 | 143647386 | 0.0192 | 0.1694 | -0.8925 |
| CHB | HIST2 | 143652386 | 0.0192 | 0.1694 | -0.8925 |
| CHB | HIST2 | 143657386 | 0.3705 | 0.1694 | 1.195   |
| CHB | HIST2 | 143662386 | 1.1017 | 2.033  | -1.1106 |
| CHB | HIST2 | 143667386 | 1.6033 | 3.2189 | -1.3282 |
| CHB | HIST2 | 143672386 | 0.8721 | 1.3553 | -0.7831 |
| CHB | HIST2 | 143677386 | 0      | 0      | 0       |
| CHB | HIST2 | 143682386 | 0      | 0      | 0       |
| CHB | HIST2 | 143687386 | 0.0097 | 0.1694 | -0.949  |
| CHB | HIST2 | 143692386 | 0.0097 | 0.1694 | -0.949  |
| CHB | HIST2 | 143697386 | 0      | 0      | 0       |
| CHB | HIST2 | 143702386 | 0      | 0      | 0       |
| CHB | HIST2 | 143707386 | 0.7843 | 0.3388 | 1.787   |
| CHB | HIST2 | 143712386 | 0.7843 | 0.3388 | 1.787   |
| CHB | HIST2 | 143717386 | 0.4784 | 0.6777 | -0.521  |
| CHB | HIST2 | 143722386 | 0.9044 | 1.8636 | -1.2238 |
| CHB | HIST2 | 143727386 | 0.5313 | 2.033  | -1.7908 |
| CHB | HIST2 | 143732386 | 1.3145 | 2.3718 | -1.1161 |
| CHB | HIST2 | 143737386 | 1.2092 | 1.5247 | -0.4687 |
| CHB | HIST2 | 143742386 | 1.0977 | 1.1859 | -0.1574 |
| CHB | HIST2 | 143747386 | 1.5688 | 2.5412 | -0.971  |
| CHB | HIST2 | 143752386 | 1.3095 | 2.5412 | -1.2299 |
| CHB | HIST2 | 143757386 | 1.0626 | 2.3718 | -1.382  |
| CHB | HIST2 | 143762386 | 2.715  | 3.5577 | -0.6369 |
| CHB | HIST2 | 143767386 | 6.292  | 6.6072 | -0.1384 |
| CHB | HIST2 | 143772386 | 3.8013 | 4.2354 | -0.2826 |
| CHB | HIST2 | 143777386 | 0      | 0      | 0       |
| CHB | HIST2 | 143782386 | 0      | 0      | 0       |
| CHB | HIST2 | 143787386 | 0      | 0      | 0       |
| CHB | HIST2 | 143792386 | 0      | 0      | 0       |
| CHB | HIST2 | 143797386 | 0      | 0      | 0       |
| CHB | HIST2 | 143802386 | 0      | 0      | 0       |
| CHB | HIST2 | 143807386 | 0      | 0      | 0       |
| CHB | HIST2 | 143812386 | 0      | 0      | 0       |
| CHB | HIST2 | 143817386 | 0      | 0      | 0       |
| CHB | HIST2 | 143822386 | 0      | 0      | 0       |
| CHB | HIST2 | 143827386 | 0      | 0      | 0       |
| CHB | HIST2 | 143832386 | 0      | 0      | 0       |
| CHB | HIST2 | 143837386 | 0      | 0      | 0       |
| CHB | HIST2 | 143842386 | 0      | 0      | 0       |

## 2\_TajimasD\_data

|     |       |           |        |        |         |
|-----|-------|-----------|--------|--------|---------|
| CHB | HIST2 | 143847386 | 0      | 0      | 0       |
| CHB | HIST2 | 143852386 | 0      | 0      | 0       |
| CHB | HIST2 | 143857386 | 0      | 0      | 0       |
| CHB | HIST2 | 143862386 | 0      | 0      | 0       |
| CHB | HIST2 | 143867386 | 0      | 0      | 0       |
| CHB | HIST2 | 143872386 | 0.0097 | 0.1694 | -0.949  |
| CHB | HIST2 | 143877386 | 0.5924 | 1.5247 | -1.3851 |
| CHB | HIST2 | 143882386 | 0.5827 | 1.3553 | -1.2521 |
| CHB | HIST2 | 143887386 | 0      | 0      | 0       |
| CHB | HIST2 | 143892386 | 0.0659 | 0.1694 | -0.615  |
| CHB | HIST2 | 143897386 | 0.3564 | 0.3388 | 0.0706  |
| CHB | HIST2 | 143902386 | 0.5534 | 1.0165 | -0.9216 |
| CHB | HIST2 | 143907386 | 0.4156 | 2.033  | -1.9288 |
| CHB | HIST2 | 143912386 | 0.3398 | 2.2024 | -2.0856 |
| CHB | HIST2 | 143917386 | 0.3132 | 2.5412 | -2.2248 |
| CHB | HIST2 | 143922386 | 0.8717 | 2.2024 | -1.49   |
| CHB | HIST2 | 143927386 | 1.8987 | 1.8636 | 0.0448  |
| CHB | HIST2 | 143932386 | 1.3259 | 2.5412 | -1.2136 |
| CHB | HIST2 | 143937386 | 1.2347 | 2.8801 | -1.4835 |
| CHB | HIST2 | 143942386 | 1.6134 | 2.2024 | -0.6595 |
| CHB | HIST2 | 143947386 | 0.6486 | 2.2024 | -1.7398 |
| CHB | HIST2 | 143952386 | 0.1262 | 1.8636 | -2.2167 |
| CHB | HIST2 | 143957386 | 0.0777 | 1.1859 | -1.9781 |
| CHB | HIST2 | 143962386 | 0.1163 | 1.8636 | -2.2293 |
| CHB | HIST2 | 143967386 | 0.592  | 1.5247 | -1.3857 |
| CHB | HIST2 | 143972386 | 0.9427 | 1.3553 | -0.6687 |
| CHB | HIST2 | 143977386 | 0.4377 | 1.0165 | -1.1518 |
| CHB | HIST2 | 143982386 | 2.7283 | 2.3718 | 0.3763  |
| CHB | HIST2 | 143987386 | 3.3114 | 3.3883 | -0.0606 |
| CHB | HIST2 | 143992386 | 2.3048 | 2.5412 | -0.2361 |
| CHB | HIST2 | 143997386 | 2.9636 | 3.3883 | -0.3345 |
| CHB | HIST2 | 144002386 | 1.8563 | 4.066  | -1.4901 |
| CHB | HIST2 | 144007386 | 5.5533 | 5.4213 | 0.0692  |
| CHB | HIST2 | 144012386 | 7.5729 | 8.3013 | -0.2598 |
| CHB | HIST2 | 144017386 | 3.5328 | 6.6072 | -1.3503 |
| CHB | HIST2 | 144022386 | 2.4666 | 2.8801 | -0.3728 |
| CHB | HIST2 | 144027386 | 2.9566 | 2.7106 | 0.2331  |
| CHB | HIST2 | 144032386 | 1.7211 | 3.0495 | -1.1424 |
| CHB | HIST2 | 144037386 | 0.4373 | 2.3718 | -2.042  |
| CHB | HIST2 | 144042386 | 3.0813 | 3.5577 | -0.36   |
| CHB | HIST2 | 144047386 | 4.264  | 4.5742 | -0.1889 |
| CHB | HIST2 | 144052386 | 1.4803 | 3.3883 | -1.5026 |
| CHB | HIST2 | 144057386 | 0.3061 | 2.2024 | -2.1233 |
| CHB | HIST2 | 144062386 | 0.9088 | 2.7106 | -1.7073 |
| CHB | HIST2 | 144067386 | 1.6511 | 3.0495 | -1.2026 |
| CHB | HIST2 | 144072386 | 1.0841 | 2.3718 | -1.3593 |
| CHB | HIST2 | 144077386 | 0.344  | 3.0495 | -2.3267 |
| CHB | HIST2 | 144082386 | 0.414  | 3.0495 | -2.2665 |
| CHB | HIST2 | 144087386 | 0.3371 | 2.033  | -2.0224 |

## 2\_TajimasD\_data

|     |       |           |        |        |         |
|-----|-------|-----------|--------|--------|---------|
| CHB | HIST2 | 144092386 | 0.2911 | 1.5247 | -1.8327 |
| CHB | HIST2 | 144097386 | 0.233  | 0.8471 | -1.3848 |
| CHB | HIST2 | 144102386 | 0      | 0      | 0       |
| CHB | HIST2 | 144107386 | 0      | 0      | 0       |
| CHB | HIST2 | 144112386 | 0      | 0      | 0       |
| CHB | HIST2 | 144117386 | 0      | 0      | 0       |
| CHB | HIST2 | 144122386 | 0      | 0      | 0       |
| CHB | HIST2 | 144127386 | 0      | 0      | 0       |
| CHB | HIST2 | 144132386 | 0      | 0      | 0       |
| CHB | HIST2 | 144137386 | 0      | 0      | 0       |
| CHB | HIST2 | 144142386 | 0      | 0      | 0       |
| CHB | HIST2 | 144147386 | 0      | 0      | 0       |
| CHB | HIST2 | 144152386 | 0.0289 | 0.1694 | -0.8349 |
| CHB | HIST2 | 144157386 | 0.6709 | 0.5082 | 0.5107  |
| CHB | HIST2 | 144162386 | 0.6901 | 0.8471 | -0.354  |
| CHB | HIST2 | 144167386 | 1.0135 | 1.0165 | -0.006  |
| CHB | HIST2 | 144172386 | 0.9654 | 0.5082 | 1.4352  |
| CHB | HIST2 | 144177386 | 0.4934 | 0.1694 | 1.9253  |
| CHB | HIST2 | 144182386 | 0.4934 | 0.1694 | 1.9253  |
| CHB | HIST2 | 144187386 | 0      | 0      | 0       |
| CHB | HIST2 | 144192386 | 0.0097 | 0.1694 | -0.949  |
| CHB | HIST2 | 144197386 | 0.1376 | 0.3388 | -0.8071 |
| CHB | HIST2 | 144202386 | 0.1279 | 0.1694 | -0.2466 |
| CHB | HIST2 | 144207386 | 0      | 0      | 0       |
| CHB | HIST2 | 144212386 | 0      | 0      | 0       |
| CHB | HIST2 | 144217386 | 0.5108 | 1.1859 | -1.205  |
| CHB | HIST2 | 144222386 | 0.5108 | 1.1859 | -1.205  |
| CHB | HIST2 | 144227386 | 0      | 0      | 0       |
| CHB | HIST2 | 144232386 | 0      | 0      | 0       |
| CHB | HIST2 | 144237386 | 0      | 0      | 0       |
| CHB | HIST2 | 144242386 | 0      | 0      | 0       |
| CHB | HIST2 | 144247386 | 0      | 0      | 0       |
| CHB | HIST2 | 144252386 | 0      | 0      | 0       |
| CHB | HIST2 | 144257386 | 0      | 0      | 0       |
| CHB | HIST2 | 144262386 | 0      | 0      | 0       |
| CHB | HIST2 | 144267386 | 0      | 0      | 0       |
| CHB | HIST2 | 144272386 | 0.3031 | 0.1694 | 0.7945  |
| CHB | HIST2 | 144277386 | 0.3031 | 0.1694 | 0.7945  |
| CHB | HIST2 | 144282386 | 0.3031 | 0.1694 | 0.7945  |
| CHB | HIST2 | 144287386 | 0.3031 | 0.1694 | 0.7945  |
| CHB | HIST2 | 144292386 | 0      | 0      | 0       |
| CHB | HIST2 | 144297386 | 0      | 0      | 0       |
| CHB | HIST2 | 144302386 | 0.8692 | 0.8471 | 0.0498  |
| CHB | HIST2 | 144307386 | 0.8692 | 0.8471 | 0.0498  |
| CHB | HIST2 | 144312386 | 0      | 0.1694 | -1.0066 |
| CHB | HIST2 | 144317386 | 0.2496 | 0.6777 | -1.1192 |
| CHB | HIST2 | 144322386 | 0.3065 | 0.6777 | -0.9704 |
| CHB | HIST2 | 144327386 | 0.0666 | 0.3388 | -1.0919 |
| CHB | HIST2 | 144332386 | 0.0097 | 0.1694 | -0.949  |

## 2\_TajimasD\_data

|     |       |           |         |         |         |
|-----|-------|-----------|---------|---------|---------|
| CHB | HIST2 | 144337386 | 0.0192  | 0.1694  | -0.8925 |
| CHB | HIST2 | 144342386 | 0.0577  | 0.3388  | -1.1276 |
| CHB | HIST2 | 144347386 | 0.0385  | 0.1694  | -0.7778 |
| CHB | HIST2 | 144352386 | 0       | 0       | 0       |
| CHB | HIST2 | 144357386 | 0       | 0       | 0       |
| CHB | HIST2 | 144362386 | 0.1239  | 0.5082  | -1.2064 |
| CHB | HIST2 | 144367386 | 0.1239  | 0.5082  | -1.2064 |
| CHB | HIST2 | 144372386 | 0       | 0       | 0       |
| CHB | HIST2 | 144377386 | 0       | 0       | 0       |
| CHB | HIST2 | 144382386 | 0       | 0       | 0       |
| CHB | HIST2 | 144387386 | 0.0097  | 0.1694  | -0.949  |
| CHB | HIST2 | 144392386 | 0.0097  | 0.1694  | -0.949  |
| CHB | HIST2 | 144397386 | 0       | 0       | 0       |
| YRI | HIST2 | 143407386 | 2.6805  | 6.7225  | -1.7417 |
| YRI | HIST2 | 143412386 | 4.4176  | 8.5712  | -1.4334 |
| YRI | HIST2 | 143417386 | 4.5031  | 8.7392  | -1.4359 |
| YRI | HIST2 | 143422386 | 4.3184  | 7.7309  | -1.2948 |
| YRI | HIST2 | 143427386 | 2.5742  | 4.5377  | -1.1998 |
| YRI | HIST2 | 143432386 | 0.1725  | 1.0084  | -1.6665 |
| YRI | HIST2 | 143437386 | 0.6372  | 1.5126  | -1.3035 |
| YRI | HIST2 | 143442386 | 1.8666  | 2.5209  | -0.6553 |
| YRI | HIST2 | 143447386 | 2.6342  | 2.3529  | 0.2978  |
| YRI | HIST2 | 143452386 | 1.5768  | 1.5126  | 0.0956  |
| YRI | HIST2 | 143457386 | 2.1789  | 4.0335  | -1.2548 |
| YRI | HIST2 | 143462386 | 2.7601  | 8.7392  | -2.0268 |
| YRI | HIST2 | 143467386 | 1.9548  | 13.7811 | -2.6163 |
| YRI | HIST2 | 143472386 | 2.5691  | 13.9492 | -2.4888 |
| YRI | HIST2 | 143477386 | 3.7722  | 12.7727 | -2.1397 |
| YRI | HIST2 | 143482386 | 3.4752  | 12.2685 | -2.1715 |
| YRI | HIST2 | 143487386 | 3.1726  | 10.924  | -2.1349 |
| YRI | HIST2 | 143492386 | 8.8184  | 14.1172 | -1.1457 |
| YRI | HIST2 | 143497386 | 10.9744 | 14.6214 | -0.7627 |
| YRI | HIST2 | 143502386 | 9.1533  | 11.4282 | -0.6006 |
| YRI | HIST2 | 143507386 | 10.4027 | 12.6047 | -0.5301 |
| YRI | HIST2 | 143512386 | 10.0613 | 14.7895 | -0.9781 |
| YRI | HIST2 | 143517386 | 10.9798 | 14.7895 | -0.7881 |
| YRI | HIST2 | 143522386 | 13.1785 | 17.8146 | -0.8028 |
| YRI | HIST2 | 143527386 | 10.979  | 14.9575 | -0.8142 |
| YRI | HIST2 | 143532386 | 9.3211  | 10.756  | -0.401  |
| YRI | HIST2 | 143537386 | 13.0918 | 13.1089 | -0.004  |
| YRI | HIST2 | 143542386 | 9.6054  | 10.756  | -0.3215 |
| YRI | HIST2 | 143547386 | 1.6449  | 3.3612  | -1.3559 |
| YRI | HIST2 | 143552386 | 0       | 0       | 0       |
| YRI | HIST2 | 143557386 | 0       | 0       | 0       |
| YRI | HIST2 | 143562386 | 0       | 0       | 0       |
| YRI | HIST2 | 143567386 | 0       | 0       | 0       |
| YRI | HIST2 | 143572386 | 0       | 0       | 0       |
| YRI | HIST2 | 143577386 | 0       | 0       | 0       |
| YRI | HIST2 | 143582386 | 0       | 0       | 0       |

## 2\_TajimasD\_data

|     |       |           |        |        |         |
|-----|-------|-----------|--------|--------|---------|
| YRI | HIST2 | 143587386 | 0      | 0      | 0       |
| YRI | HIST2 | 143592386 | 0      | 0      | 0       |
| YRI | HIST2 | 143597386 | 0      | 0      | 0       |
| YRI | HIST2 | 143602386 | 0      | 0      | 0       |
| YRI | HIST2 | 143607386 | 0      | 0      | 0       |
| YRI | HIST2 | 143612386 | 0      | 0      | 0       |
| YRI | HIST2 | 143617386 | 0      | 0      | 0       |
| YRI | HIST2 | 143622386 | 0      | 0      | 0       |
| YRI | HIST2 | 143627386 | 0      | 0      | 0       |
| YRI | HIST2 | 143632386 | 0      | 0      | 0       |
| YRI | HIST2 | 143637386 | 0      | 0      | 0       |
| YRI | HIST2 | 143642386 | 0      | 0      | 0       |
| YRI | HIST2 | 143647386 | 0      | 0      | 0       |
| YRI | HIST2 | 143652386 | 0.0278 | 0.3361 | -1.2377 |
| YRI | HIST2 | 143657386 | 0.2998 | 0.5042 | -0.6424 |
| YRI | HIST2 | 143662386 | 2.5627 | 4.0335 | -0.9952 |
| YRI | HIST2 | 143667386 | 3.2208 | 6.7225 | -1.5089 |
| YRI | HIST2 | 143672386 | 0.93   | 2.8571 | -1.7428 |
| YRI | HIST2 | 143677386 | 0      | 0      | 0       |
| YRI | HIST2 | 143682386 | 0      | 0      | 0       |
| YRI | HIST2 | 143687386 | 0.7359 | 0.6722 | 0.1668  |
| YRI | HIST2 | 143692386 | 0.7359 | 0.6722 | 0.1668  |
| YRI | HIST2 | 143697386 | 0      | 0      | 0       |
| YRI | HIST2 | 143702386 | 0      | 0      | 0       |
| YRI | HIST2 | 143707386 | 0.4924 | 0.6722 | -0.4707 |
| YRI | HIST2 | 143712386 | 0.4924 | 0.6722 | -0.4707 |
| YRI | HIST2 | 143717386 | 0.8239 | 1.3445 | -0.8456 |
| YRI | HIST2 | 143722386 | 0.9714 | 2.8571 | -1.7053 |
| YRI | HIST2 | 143727386 | 0.5687 | 2.689  | -2.0151 |
| YRI | HIST2 | 143732386 | 1.4673 | 2.689  | -1.1611 |
| YRI | HIST2 | 143737386 | 1.0826 | 1.6806 | -0.8227 |
| YRI | HIST2 | 143742386 | 0.6066 | 2.689  | -1.979  |
| YRI | HIST2 | 143747386 | 2.2516 | 6.5544 | -1.897  |
| YRI | HIST2 | 143752386 | 2.7569 | 6.3864 | -1.6381 |
| YRI | HIST2 | 143757386 | 1.9095 | 7.0586 | -2.1227 |
| YRI | HIST2 | 143762386 | 3.2209 | 8.7392 | -1.8706 |
| YRI | HIST2 | 143767386 | 6.129  | 8.7392 | -0.8848 |
| YRI | HIST2 | 143772386 | 3.7422 | 4.7057 | -0.5703 |
| YRI | HIST2 | 143777386 | 0      | 0      | 0       |
| YRI | HIST2 | 143782386 | 0      | 0      | 0       |
| YRI | HIST2 | 143787386 | 0      | 0      | 0       |
| YRI | HIST2 | 143792386 | 0      | 0      | 0       |
| YRI | HIST2 | 143797386 | 0      | 0      | 0       |
| YRI | HIST2 | 143802386 | 0      | 0      | 0       |
| YRI | HIST2 | 143807386 | 0      | 0      | 0       |
| YRI | HIST2 | 143812386 | 0      | 0      | 0       |
| YRI | HIST2 | 143817386 | 0      | 0      | 0       |
| YRI | HIST2 | 143822386 | 0      | 0      | 0       |
| YRI | HIST2 | 143827386 | 0      | 0      | 0       |

## 2\_TajimasD\_data

|     |       |           |        |         |         |
|-----|-------|-----------|--------|---------|---------|
| YRI | HIST2 | 143832386 | 0      | 0       | 0       |
| YRI | HIST2 | 143837386 | 0      | 0       | 0       |
| YRI | HIST2 | 143842386 | 0      | 0       | 0       |
| YRI | HIST2 | 143847386 | 0      | 0       | 0       |
| YRI | HIST2 | 143852386 | 0      | 0       | 0       |
| YRI | HIST2 | 143857386 | 0      | 0       | 0       |
| YRI | HIST2 | 143862386 | 0      | 0       | 0       |
| YRI | HIST2 | 143867386 | 0      | 0       | 0       |
| YRI | HIST2 | 143872386 | 0.4454 | 1.1764  | -1.3074 |
| YRI | HIST2 | 143877386 | 1.4515 | 3.3612  | -1.5087 |
| YRI | HIST2 | 143882386 | 1.0061 | 2.1848  | -1.3234 |
| YRI | HIST2 | 143887386 | 0.0718 | 0.1681  | -0.5725 |
| YRI | HIST2 | 143892386 | 0.0718 | 0.1681  | -0.5725 |
| YRI | HIST2 | 143897386 | 0.2783 | 0.5042  | -0.7099 |
| YRI | HIST2 | 143902386 | 0.3779 | 1.0084  | -1.257  |
| YRI | HIST2 | 143907386 | 0.4659 | 2.0167  | -1.8542 |
| YRI | HIST2 | 143912386 | 0.9369 | 2.8571  | -1.7365 |
| YRI | HIST2 | 143917386 | 0.6169 | 2.0167  | -1.6737 |
| YRI | HIST2 | 143922386 | 1.1127 | 2.5209  | -1.4103 |
| YRI | HIST2 | 143927386 | 2.433  | 4.3696  | -1.2228 |
| YRI | HIST2 | 143932386 | 2.3113 | 4.3696  | -1.2997 |
| YRI | HIST2 | 143937386 | 2.3952 | 3.3612  | -0.7632 |
| YRI | HIST2 | 143942386 | 2.3116 | 2.5209  | -0.2096 |
| YRI | HIST2 | 143947386 | 1.2472 | 2.689   | -1.3702 |
| YRI | HIST2 | 143952386 | 0.5504 | 2.689   | -2.0324 |
| YRI | HIST2 | 143957386 | 0.6371 | 2.689   | -1.95   |
| YRI | HIST2 | 143962386 | 0.9082 | 3.8654  | -2.0752 |
| YRI | HIST2 | 143967386 | 0.8757 | 3.1932  | -1.9113 |
| YRI | HIST2 | 143972386 | 1.0502 | 2.0167  | -1.1556 |
| YRI | HIST2 | 143977386 | 0.736  | 1.6806  | -1.2995 |
| YRI | HIST2 | 143982386 | 3.1308 | 3.6974  | -0.413  |
| YRI | HIST2 | 143987386 | 4.2257 | 4.8738  | -0.372  |
| YRI | HIST2 | 143992386 | 3.5532 | 5.0419  | -0.8295 |
| YRI | HIST2 | 143997386 | 4.1897 | 5.2099  | -0.5522 |
| YRI | HIST2 | 144002386 | 3.4764 | 5.2099  | -0.9383 |
| YRI | HIST2 | 144007386 | 7.3358 | 8.9073  | -0.5234 |
| YRI | HIST2 | 144012386 | 8.797  | 13.1089 | -1.0002 |
| YRI | HIST2 | 144017386 | 4.5092 | 11.2602 | -1.8073 |
| YRI | HIST2 | 144022386 | 2.9238 | 5.7141  | -1.3914 |
| YRI | HIST2 | 144027386 | 3.19   | 4.7057  | -0.8972 |
| YRI | HIST2 | 144032386 | 2.2247 | 4.8738  | -1.5207 |
| YRI | HIST2 | 144037386 | 0.9351 | 3.8654  | -2.0564 |
| YRI | HIST2 | 144042386 | 3.781  | 5.7141  | -0.964  |
| YRI | HIST2 | 144047386 | 4.8642 | 7.2267  | -0.9533 |
| YRI | HIST2 | 144052386 | 2.1861 | 6.0502  | -1.8308 |
| YRI | HIST2 | 144057386 | 1.0654 | 4.5377  | -2.1217 |
| YRI | HIST2 | 144062386 | 1.9046 | 4.8738  | -1.7044 |
| YRI | HIST2 | 144067386 | 2.7733 | 6.0502  | -1.5526 |
| YRI | HIST2 | 144072386 | 1.7407 | 4.7057  | -1.7551 |



## 2\_TajimasD\_data

|     |       |           |        |        |         |
|-----|-------|-----------|--------|--------|---------|
| YRI | HIST2 | 144077386 | 0.9994 | 3.3612 | -1.8659 |
| YRI | HIST2 | 144082386 | 1.6202 | 3.3612 | -1.3755 |
| YRI | HIST2 | 144087386 | 1.3293 | 2.1848 | -0.9605 |
| YRI | HIST2 | 144092386 | 0.516  | 1.6806 | -1.6021 |
| YRI | HIST2 | 144097386 | 0.3113 | 1.1764 | -1.5473 |
| YRI | HIST2 | 144102386 | 0      | 0      | 0       |
| YRI | HIST2 | 144107386 | 0      | 0      | 0       |
| YRI | HIST2 | 144112386 | 0      | 0      | 0       |
| YRI | HIST2 | 144117386 | 0      | 0      | 0       |
| YRI | HIST2 | 144122386 | 0      | 0      | 0       |
| YRI | HIST2 | 144127386 | 0      | 0      | 0       |
| YRI | HIST2 | 144132386 | 0      | 0      | 0       |
| YRI | HIST2 | 144137386 | 0      | 0      | 0       |
| YRI | HIST2 | 144142386 | 0.0276 | 0.3361 | -1.2385 |
| YRI | HIST2 | 144147386 | 0.0276 | 0.3361 | -1.2385 |
| YRI | HIST2 | 144152386 | 0.0276 | 0.1681 | -0.8352 |
| YRI | HIST2 | 144157386 | 0.6035 | 1.0084 | -0.8072 |
| YRI | HIST2 | 144162386 | 0.8103 | 1.3445 | -0.8676 |
| YRI | HIST2 | 144167386 | 1.2144 | 1.0084 | 0.4107  |
| YRI | HIST2 | 144172386 | 0.98   | 0.5042 | 1.4953  |
| YRI | HIST2 | 144177386 | 0.4914 | 0.1681 | 1.9219  |
| YRI | HIST2 | 144182386 | 0.4914 | 0.1681 | 1.9219  |
| YRI | HIST2 | 144187386 | 0.0093 | 0.1681 | -0.944  |
| YRI | HIST2 | 144192386 | 0.0185 | 0.3361 | -1.275  |
| YRI | HIST2 | 144197386 | 0.1234 | 0.3361 | -0.8539 |
| YRI | HIST2 | 144202386 | 0.1141 | 0.1681 | -0.321  |
| YRI | HIST2 | 144207386 | 0      | 0      | 0       |
| YRI | HIST2 | 144212386 | 0      | 0      | 0       |
| YRI | HIST2 | 144217386 | 0.6969 | 1.5126 | -1.2146 |
| YRI | HIST2 | 144222386 | 0.6969 | 1.5126 | -1.2146 |
| YRI | HIST2 | 144227386 | 0      | 0      | 0       |
| YRI | HIST2 | 144232386 | 0      | 0      | 0       |
| YRI | HIST2 | 144237386 | 0      | 0      | 0       |
| YRI | HIST2 | 144242386 | 0      | 0      | 0       |
| YRI | HIST2 | 144247386 | 0      | 0      | 0       |
| YRI | HIST2 | 144252386 | 0      | 0      | 0       |
| YRI | HIST2 | 144257386 | 0      | 0      | 0       |
| YRI | HIST2 | 144262386 | 0      | 0      | 0       |
| YRI | HIST2 | 144267386 | 0      | 0      | 0       |
| YRI | HIST2 | 144272386 | 0.2983 | 0.1681 | 0.774   |
| YRI | HIST2 | 144277386 | 0.2983 | 0.1681 | 0.774   |
| YRI | HIST2 | 144282386 | 0.2983 | 0.1681 | 0.774   |
| YRI | HIST2 | 144287386 | 0.2983 | 0.1681 | 0.774   |
| YRI | HIST2 | 144292386 | 0      | 0      | 0       |
| YRI | HIST2 | 144297386 | 0      | 0      | 0       |
| YRI | HIST2 | 144302386 | 1.6516 | 1.0084 | 1.2823  |
| YRI | HIST2 | 144307386 | 1.6516 | 1.0084 | 1.2823  |
| YRI | HIST2 | 144312386 | 0      | 0.1681 | -0.9993 |
| YRI | HIST2 | 144317386 | 0.3371 | 1.0084 | -1.3384 |

## 2\_TajimasD\_data

|     |       |           |        |        |         |
|-----|-------|-----------|--------|--------|---------|
| YRI | HIST2 | 144322386 | 0.3827 | 1.0084 | -1.2474 |
| YRI | HIST2 | 144327386 | 0.0549 | 0.3361 | -1.1289 |
| YRI | HIST2 | 144332386 | 0.0093 | 0.1681 | -0.944  |
| YRI | HIST2 | 144337386 | 0.5042 | 0.1681 | 1.998   |
| YRI | HIST2 | 144342386 | 0.5042 | 0.1681 | 1.998   |
| YRI | HIST2 | 144347386 | 0      | 0      | 0       |
| YRI | HIST2 | 144352386 | 0      | 0      | 0       |
| YRI | HIST2 | 144357386 | 0.0093 | 0.1681 | -0.944  |
| YRI | HIST2 | 144362386 | 0.6053 | 0.6722 | -0.1751 |
| YRI | HIST2 | 144367386 | 0.5961 | 0.5042 | 0.2888  |
| YRI | HIST2 | 144372386 | 0      | 0      | 0       |
| YRI | HIST2 | 144377386 | 0.0093 | 0.1681 | -0.944  |
| YRI | HIST2 | 144382386 | 0.0093 | 0.1681 | -0.944  |
| YRI | HIST2 | 144387386 | 0      | 0      | 0       |
| YRI | HIST2 | 144392386 | 0      | 0      | 0       |
| YRI | HIST2 | 144397386 | 0      | 0      | 0       |
| CEU | HIST2 | 149287689 | 3.9555 | 2.8996 | 0.9496  |
| CEU | HIST2 | 149292689 | 4.4016 | 4.2641 | 0.0893  |
| CEU | HIST2 | 149297689 | 4.7409 | 4.7757 | -0.0205 |
| CEU | HIST2 | 149302689 | 2.3857 | 2.3879 | -0.0023 |
| CEU | HIST2 | 149307689 | 3.8181 | 2.8996 | 0.826   |
| CEU | HIST2 | 149312689 | 3.2485 | 3.2407 | 0.0064  |
| CEU | HIST2 | 149317689 | 2.3018 | 2.2173 | 0.0944  |
| CEU | HIST2 | 149322689 | 3.0649 | 1.7056 | 1.8617  |
| CEU | HIST2 | 149327689 | 2.8089 | 2.8996 | -0.0816 |
| CEU | HIST2 | 149332689 | 6.0913 | 6.8225 | -0.3129 |
| CEU | HIST2 | 149337689 | 7.1923 | 8.3576 | -0.4142 |
| CEU | HIST2 | 149342689 | 6.0491 | 5.7991 | 0.1238  |
| CEU | HIST2 | 149347689 | 6.6485 | 5.6286 | 0.5188  |
| CEU | HIST2 | 149352689 | 5.6024 | 6.1402 | -0.2531 |
| CEU | HIST2 | 149357689 | 5.7143 | 5.9697 | -0.1233 |
| CEU | HIST2 | 149362689 | 5.215  | 5.1169 | 0.0543  |
| CEU | HIST2 | 149367689 | 2.5683 | 3.2407 | -0.5514 |
| CEU | HIST2 | 149372689 | 3.4358 | 4.7757 | -0.788  |
| CEU | HIST2 | 149377689 | 4.537  | 5.458  | -0.4815 |
| CEU | HIST2 | 149382689 | 3.7069 | 4.0935 | -0.26   |
| CEU | HIST2 | 149387689 | 5.2144 | 4.4346 | 0.4893  |
| CEU | HIST2 | 149392689 | 6.3327 | 5.9697 | 0.1752  |
| CEU | HIST2 | 149397689 | 5.2449 | 5.7991 | -0.2745 |
| CEU | HIST2 | 149402689 | 5.9522 | 5.9697 | -0.0084 |
| CEU | HIST2 | 149407689 | 4.525  | 4.6052 | -0.0487 |
| CEU | HIST2 | 149412689 | 4.3368 | 3.4112 | 0.727   |
| CEU | HIST2 | 149417689 | 4.1068 | 3.2407 | 0.7102  |
| CEU | HIST2 | 149422689 | 2.0064 | 1.8762 | 0.1658  |
| CEU | HIST2 | 149427689 | 2.7172 | 2.729  | -0.0112 |
| CEU | HIST2 | 149432689 | 2.2086 | 2.3879 | -0.1888 |
| CEU | HIST2 | 149437689 | 0.5232 | 0.6822 | -0.4152 |
| CEU | HIST2 | 149442689 | 0      | 0      | 0       |
| CEU | HIST2 | 149447689 | 0.08   | 0.5117 | -1.3539 |

## 2\_TajimasD\_data

|     |       |           |        |        |         |
|-----|-------|-----------|--------|--------|---------|
| CEU | HIST2 | 149452689 | 0.1394 | 0.8528 | -1.6066 |
| CEU | HIST2 | 149457689 | 0.128  | 0.6822 | -1.4472 |
| CEU | HIST2 | 149462689 | 0.0686 | 0.3411 | -1.0924 |
| CEU | HIST2 | 149467689 | 0      | 0      | 0       |
| CEU | HIST2 | 149472689 | 0      | 0      | 0       |
| CEU | HIST2 | 149477689 | 0      | 0      | 0       |
| CEU | HIST2 | 149482689 | 0      | 0      | 0       |
| CEU | HIST2 | 149487689 | 0      | 0      | 0       |
| CEU | HIST2 | 149492689 | 0      | 0      | 0       |
| CEU | HIST2 | 149497689 | 0      | 0      | 0       |
| CEU | HIST2 | 149502689 | 0      | 0      | 0       |
| CEU | HIST2 | 149507689 | 0.1363 | 0.5117 | -1.1774 |
| CEU | HIST2 | 149512689 | 0.4605 | 1.1939 | -1.3069 |
| CEU | HIST2 | 149517689 | 0.3243 | 0.6822 | -0.9346 |
| CEU | HIST2 | 149522689 | 0      | 0      | 0       |
| CEU | HIST2 | 149527689 | 0.0101 | 0.1706 | -0.9534 |
| CEU | HIST2 | 149532689 | 0.0101 | 0.1706 | -0.9534 |
| CEU | HIST2 | 149537689 | 0      | 0      | 0       |
| CEU | HIST2 | 149542689 | 0      | 0      | 0       |
| CEU | HIST2 | 149547689 | 0      | 0      | 0       |
| CEU | HIST2 | 149552689 | 0      | 0      | 0       |
| CEU | HIST2 | 149557689 | 0      | 0      | 0       |
| CEU | HIST2 | 149562689 | 0      | 0      | 0       |
| CEU | HIST2 | 149567689 | 0.5038 | 0.1706 | 1.9793  |
| CEU | HIST2 | 149572689 | 0.885  | 0.6822 | 0.5296  |
| CEU | HIST2 | 149577689 | 0.4805 | 1.0234 | -1.0788 |
| CEU | HIST2 | 149582689 | 2.8182 | 3.2407 | -0.3464 |
| CEU | HIST2 | 149587689 | 3.7007 | 3.2407 | 0.3772  |
| CEU | HIST2 | 149592689 | 2.1459 | 2.0467 | 0.118   |
| CEU | HIST2 | 149597689 | 2.4286 | 2.8996 | -0.4236 |
| CEU | HIST2 | 149602689 | 5.8841 | 4.4346 | 0.9095  |
| CEU | HIST2 | 149607689 | 7.5463 | 4.7757 | 1.6295  |
| CEU | HIST2 | 149612689 | 3.7706 | 2.2173 | 1.7353  |
| CEU | HIST2 | 149617689 | 0.8439 | 0.5117 | 1.0419  |
| CEU | HIST2 | 149622689 | 0      | 0      | 0       |
| CEU | HIST2 | 149627689 | 0.0301 | 0.1706 | -0.8346 |
| CEU | HIST2 | 149632689 | 0.0301 | 0.1706 | -0.8346 |
| CEU | HIST2 | 149637689 | 2.3997 | 1.7056 | 0.9507  |
| CEU | HIST2 | 149642689 | 3.7413 | 3.5818 | 0.1202  |
| CEU | HIST2 | 149647689 | 7.4811 | 6.6519 | 0.363   |
| CEU | HIST2 | 149652689 | 7.906  | 6.1402 | 0.8309  |
| CEU | HIST2 | 149657689 | 4.3752 | 3.5818 | 0.598   |
| CEU | HIST2 | 149662689 | 6.0134 | 6.3108 | -0.1365 |
| CEU | HIST2 | 149667689 | 5.4199 | 9.3809 | -1.2654 |
| CEU | HIST2 | 149672689 | 5.4801 | 9.5515 | -1.2791 |
| CEU | HIST2 | 149677689 | 5.2674 | 6.9931 | -0.7221 |
| CEU | HIST2 | 149682689 | 2.4492 | 4.4346 | -1.2457 |
| CEU | HIST2 | 149687689 | 0.9485 | 3.4112 | -1.9342 |
| CEU | HIST2 | 149692689 | 1.3814 | 3.4112 | -1.5942 |

## 2\_TajimasD\_data

|     |       |           |         |        |         |
|-----|-------|-----------|---------|--------|---------|
| CEU | HIST2 | 149697689 | 2.8858  | 5.1169 | -1.235  |
| CEU | HIST2 | 149702689 | 5.2948  | 6.9931 | -0.7106 |
| CEU | HIST2 | 149707689 | 8.1801  | 7.3342 | 0.3389  |
| CEU | HIST2 | 149712689 | 9.3602  | 7.8459 | 0.5705  |
| CEU | HIST2 | 149717689 | 10.1014 | 8.0164 | 0.7701  |
| CEU | HIST2 | 149722689 | 8.69    | 6.8225 | 0.7991  |
| CEU | HIST2 | 149727689 | 7.3047  | 6.8225 | 0.2063  |
| CEU | HIST2 | 149732689 | 5.9689  | 5.458  | 0.2671  |
| CEU | HIST2 | 149737689 | 2.8054  | 3.2407 | -0.3569 |
| CEU | HIST2 | 149742689 | 2.4663  | 3.4112 | -0.7421 |
| CEU | HIST2 | 149747689 | 4.6718  | 4.0935 | 0.3889  |
| CEU | HIST2 | 149752689 | 3.3781  | 3.0701 | 0.2642  |
| CEU | HIST2 | 149757689 | 1.8277  | 3.2407 | -1.1586 |
| CEU | HIST2 | 149762689 | 2.309   | 5.1169 | -1.5542 |
| CEU | HIST2 | 149767689 | 2.5848  | 5.458  | -1.502  |
| CEU | HIST2 | 149772689 | 3.2146  | 5.9697 | -1.3296 |
| CEU | HIST2 | 149777689 | 4.4694  | 6.6519 | -0.9555 |
| CEU | HIST2 | 149782689 | 5.437   | 7.6753 | -0.8603 |
| CEU | HIST2 | 149787689 | 3.731   | 6.9931 | -1.3649 |
| CEU | HIST2 | 149792689 | 1.4871  | 3.0701 | -1.3579 |
| CEU | HIST2 | 149797689 | 0.1235  | 0.1706 | -0.2798 |
| CEU | HIST2 | 149802689 | 0       | 0      | 0       |
| CEU | HIST2 | 149807689 | 0       | 0      | 0       |
| CEU | HIST2 | 149812689 | 1.5739  | 2.0467 | -0.5626 |
| CEU | HIST2 | 149817689 | 2.7071  | 4.2641 | -1.0107 |
| CEU | HIST2 | 149822689 | 1.6324  | 2.3879 | -0.7956 |
| CEU | HIST2 | 149827689 | 0.4993  | 0.1706 | 1.9525  |
| CEU | HIST2 | 149832689 | 0       | 0      | 0       |
| CEU | HIST2 | 149837689 | 0       | 0      | 0       |
| CEU | HIST2 | 149842689 | 1.0373  | 1.5351 | -0.7381 |
| CEU | HIST2 | 149847689 | 2.0711  | 4.0935 | -1.3599 |
| CEU | HIST2 | 149852689 | 2.2626  | 5.2874 | -1.6264 |
| CEU | HIST2 | 149857689 | 3.3267  | 6.8225 | -1.4958 |
| CEU | HIST2 | 149862689 | 4.2778  | 8.0164 | -1.3809 |
| CEU | HIST2 | 149867689 | 4.5095  | 8.187  | -1.3323 |
| CEU | HIST2 | 149872689 | 4.3408  | 6.8225 | -1.0619 |
| CEU | HIST2 | 149877689 | 3.9984  | 6.4814 | -1.1129 |
| CEU | HIST2 | 149882689 | 2.7013  | 5.2874 | -1.3906 |
| CEU | HIST2 | 149887689 | 2.3034  | 3.5818 | -0.9635 |
| CEU | HIST2 | 149892689 | 3.6869  | 4.9463 | -0.7182 |
| CEU | HIST2 | 149897689 | 3.5384  | 5.6286 | -1.0632 |
| CEU | HIST2 | 149902689 | 3.7885  | 5.9697 | -1.0527 |
| CEU | HIST2 | 149907689 | 3.8075  | 5.458  | -0.8628 |
| CEU | HIST2 | 149912689 | 1.6186  | 3.9229 | -1.6072 |
| CEU | HIST2 | 149917689 | 1.7209  | 4.0935 | -1.5954 |
| CEU | HIST2 | 149922689 | 3.7238  | 5.2874 | -0.8408 |
| CEU | HIST2 | 149927689 | 4.1686  | 5.6286 | -0.7426 |
| CEU | HIST2 | 149932689 | 2.617   | 5.458  | -1.4852 |
| CEU | HIST2 | 149937689 | 2.0439  | 4.6052 | -1.5551 |

## 2\_TajimasD\_data

|     |       |           |         |         |         |
|-----|-------|-----------|---------|---------|---------|
| CEU | HIST2 | 149942689 | 2.6215  | 3.7524  | -0.8193 |
| CEU | HIST2 | 149947689 | 2.2977  | 4.4346  | -1.3408 |
| CEU | HIST2 | 149952689 | 2.9812  | 5.9697  | -1.4423 |
| CEU | HIST2 | 149957689 | 2.1946  | 4.4346  | -1.4055 |
| CEU | HIST2 | 149962689 | 1.1688  | 2.5584  | -1.3843 |
| CEU | HIST2 | 149967689 | 2.1791  | 3.2407  | -0.8705 |
| CEU | HIST2 | 149972689 | 2.1826  | 3.9229  | -1.2138 |
| CEU | HIST2 | 149977689 | 2.2919  | 4.6052  | -1.4045 |
| CEU | HIST2 | 149982689 | 3.1297  | 4.9463  | -1.036  |
| CEU | HIST2 | 149987689 | 3.8433  | 5.7991  | -0.9687 |
| CEU | HIST2 | 149992689 | 5.8895  | 7.6753  | -0.6864 |
| CEU | HIST2 | 149997689 | 9.3993  | 8.5281  | 0.304   |
| CEU | HIST2 | 150002689 | 8.1973  | 6.8225  | 0.5883  |
| CEU | HIST2 | 150007689 | 7.2562  | 6.9931  | 0.1101  |
| CEU | HIST2 | 150012689 | 11.1618 | 9.7221  | 0.4449  |
| CEU | HIST2 | 150017689 | 10.6663 | 8.6987  | 0.6741  |
| CEU | HIST2 | 150022689 | 8.8505  | 7.3342  | 0.6075  |
| CEU | HIST2 | 150027689 | 6.0136  | 6.1402  | -0.0596 |
| CEU | HIST2 | 150032689 | 1.9462  | 4.2641  | -1.5046 |
| CEU | HIST2 | 150037689 | 2.7005  | 5.7991  | -1.5347 |
| CEU | HIST2 | 150042689 | 4.1932  | 6.3108  | -0.9722 |
| CEU | HIST2 | 150047689 | 4.4902  | 5.458   | -0.5059 |
| CEU | HIST2 | 150052689 | 3.1923  | 4.9463  | -1.0003 |
| CEU | HIST2 | 150057689 | 2.4185  | 4.6052  | -1.3276 |
| CEU | HIST2 | 150062689 | 3.0056  | 4.7757  | -1.0411 |
| CEU | HIST2 | 150067689 | 1.987   | 3.2407  | -1.028  |
| CEU | HIST2 | 150072689 | 5.9037  | 5.7991  | 0.0518  |
| CEU | HIST2 | 150077689 | 7.4368  | 7.6753  | -0.0917 |
| CEU | HIST2 | 150082689 | 3.1187  | 5.7991  | -1.3276 |
| CEU | HIST2 | 150087689 | 3.1278  | 6.9931  | -1.6173 |
| CEU | HIST2 | 150092689 | 4.008   | 6.3108  | -1.0573 |
| CEU | HIST2 | 150097689 | 3.9445  | 4.7757  | -0.4889 |
| CEU | HIST2 | 150102689 | 5.1649  | 6.8225  | -0.7093 |
| CEU | HIST2 | 150107689 | 6.5529  | 6.9931  | -0.1842 |
| CEU | HIST2 | 150112689 | 5.2084  | 5.6286  | -0.2137 |
| CEU | HIST2 | 150117689 | 2.9899  | 4.9463  | -1.1157 |
| CEU | HIST2 | 150122689 | 3.5481  | 6.1402  | -1.2198 |
| CEU | HIST2 | 150127689 | 5.9969  | 8.3576  | -0.8392 |
| CEU | HIST2 | 150132689 | 6.0233  | 8.6987  | -0.9166 |
| CEU | HIST2 | 150137689 | 6.0427  | 11.4277 | -1.4307 |
| CEU | HIST2 | 150142689 | 6.8081  | 9.7221  | -0.9005 |
| CEU | HIST2 | 150147689 | 5.0326  | 6.1402  | -0.5212 |
| CEU | HIST2 | 150152689 | 2.9186  | 7.1636  | -1.7377 |
| CEU | HIST2 | 150157689 | 5.2408  | 9.5515  | -1.3542 |
| CEU | HIST2 | 150162689 | 9.0115  | 9.7221  | -0.2196 |
| CEU | HIST2 | 150167689 | 10.4014 | 7.8459  | 0.9627  |
| CEU | HIST2 | 150172689 | 8.5935  | 6.8225  | 0.7578  |
| CEU | HIST2 | 150177689 | 6.1723  | 5.2874  | 0.4758  |
| CEU | HIST2 | 150182689 | 7.6821  | 6.1402  | 0.7256  |

## 2\_TajimasD\_data

|     |       |           |         |         |         |
|-----|-------|-----------|---------|---------|---------|
| CEU | HIST2 | 150187689 | 6.2696  | 6.8225  | -0.2366 |
| CEU | HIST2 | 150192689 | 5.329   | 5.9697  | -0.3092 |
| CEU | HIST2 | 150197689 | 8.2754  | 6.4814  | 0.8041  |
| CEU | HIST2 | 150202689 | 9.3094  | 7.5047  | 0.7081  |
| CEU | HIST2 | 150207689 | 9.1612  | 8.187   | 0.3529  |
| CEU | HIST2 | 150212689 | 9.5529  | 7.1636  | 0.9781  |
| CEU | HIST2 | 150217689 | 8.6856  | 6.3108  | 1.0903  |
| CEU | HIST2 | 150222689 | 6.4754  | 6.1402  | 0.1577  |
| CEU | HIST2 | 150227689 | 3.2977  | 4.2641  | -0.6273 |
| CEU | HIST2 | 150232689 | 2.6716  | 3.4112  | -0.5809 |
| CEU | HIST2 | 150237689 | 3.665   | 3.2407  | 0.3479  |
| CEU | HIST2 | 150242689 | 3.0375  | 4.2641  | -0.7962 |
| CEU | HIST2 | 150247689 | 4.9192  | 5.2874  | -0.198  |
| CEU | HIST2 | 150252689 | 5.5411  | 5.1169  | 0.2348  |
| CEU | HIST2 | 150257689 | 9.2591  | 8.0164  | 0.459   |
| CEU | HIST2 | 150262689 | 14.1268 | 8.6987  | 1.8596  |
| CEU | HIST2 | 150267689 | 18.2255 | 10.0632 | 2.4427  |
| CEU | HIST2 | 150272689 | 17.2191 | 11.9394 | 1.3461  |
| CEU | HIST2 | 150277689 | 13.2507 | 10.7454 | 0.7052  |
| CEU | HIST2 | 150282689 | 14.9365 | 10.5749 | 1.2462  |
| CEU | HIST2 | 150287689 | 13.2278 | 8.5281  | 1.6398  |
| CEU | HIST2 | 150292689 | 10.5173 | 7.5047  | 1.182   |
| CEU | HIST2 | 150297689 | 8.1028  | 7.1636  | 0.3845  |
| CEU | HIST2 | 150302689 | 7.8524  | 7.3342  | 0.2076  |
| CHB | HIST2 | 149287689 | 3.9103  | 2.7106  | 1.1368  |
| CHB | HIST2 | 149292689 | 4.0881  | 3.5577  | 0.4008  |
| CHB | HIST2 | 149297689 | 4.5445  | 4.066   | 0.3227  |
| CHB | HIST2 | 149302689 | 2.2473  | 3.3883  | -0.8986 |
| CHB | HIST2 | 149307689 | 3.5359  | 4.2354  | -0.4554 |
| CHB | HIST2 | 149312689 | 3.2448  | 4.4048  | -0.7299 |
| CHB | HIST2 | 149317689 | 1.9838  | 2.7106  | -0.6887 |
| CHB | HIST2 | 149322689 | 2.3238  | 2.7106  | -0.3665 |
| CHB | HIST2 | 149327689 | 2.5713  | 5.4213  | -1.4945 |
| CHB | HIST2 | 149332689 | 5.8686  | 8.1319  | -0.8227 |
| CHB | HIST2 | 149337689 | 6.3626  | 7.9625  | -0.5929 |
| CHB | HIST2 | 149342689 | 5.7942  | 7.1154  | -0.5426 |
| CHB | HIST2 | 149347689 | 6.0312  | 7.6237  | -0.6141 |
| CHB | HIST2 | 149352689 | 4.5502  | 6.7766  | -0.9557 |
| CHB | HIST2 | 149357689 | 5.151   | 5.2519  | -0.0544 |
| CHB | HIST2 | 149362689 | 4.5073  | 4.066   | 0.2976  |
| CHB | HIST2 | 149367689 | 2.2054  | 3.8965  | -1.1828 |
| CHB | HIST2 | 149372689 | 2.4304  | 5.2519  | -1.5217 |
| CHB | HIST2 | 149377689 | 3.2667  | 4.913   | -0.9417 |
| CHB | HIST2 | 149382689 | 3.0484  | 3.7271  | -0.4931 |
| CHB | HIST2 | 149387689 | 4.0811  | 5.5907  | -0.7702 |
| CHB | HIST2 | 149392689 | 4.9347  | 5.7601  | -0.4101 |
| CHB | HIST2 | 149397689 | 4.4259  | 5.4213  | -0.522  |
| CHB | HIST2 | 149402689 | 4.9065  | 6.7766  | -0.8028 |
| CHB | HIST2 | 149407689 | 3.0881  | 4.7436  | -0.9765 |

## 2\_TajimasD\_data

|     |       |           |        |        |         |
|-----|-------|-----------|--------|--------|---------|
| CHB | HIST2 | 149412689 | 3.8726 | 4.4048 | -0.3349 |
| CHB | HIST2 | 149417689 | 4.2707 | 4.5742 | -0.1848 |
| CHB | HIST2 | 149422689 | 1.5395 | 3.0495 | -1.2986 |
| CHB | HIST2 | 149427689 | 1.9899 | 3.7271 | -1.262  |
| CHB | HIST2 | 149432689 | 1.886  | 3.0495 | -1.0006 |
| CHB | HIST2 | 149437689 | 0.399  | 0.8471 | -1.0105 |
| CHB | HIST2 | 149442689 | 0      | 0      | 0       |
| CHB | HIST2 | 149447689 | 0.0386 | 0.5082 | -1.4741 |
| CHB | HIST2 | 149452689 | 0.1065 | 1.3553 | -2.0239 |
| CHB | HIST2 | 149457689 | 0.0873 | 1.1859 | -1.961  |
| CHB | HIST2 | 149462689 | 0.0194 | 0.3388 | -1.2812 |
| CHB | HIST2 | 149467689 | 0      | 0      | 0       |
| CHB | HIST2 | 149472689 | 0      | 0      | 0       |
| CHB | HIST2 | 149477689 | 0      | 0      | 0       |
| CHB | HIST2 | 149482689 | 0      | 0      | 0       |
| CHB | HIST2 | 149487689 | 0      | 0      | 0       |
| CHB | HIST2 | 149492689 | 0      | 0      | 0       |
| CHB | HIST2 | 149497689 | 0      | 0      | 0       |
| CHB | HIST2 | 149502689 | 0      | 0      | 0       |
| CHB | HIST2 | 149507689 | 0.6372 | 0.6777 | -0.1059 |
| CHB | HIST2 | 149512689 | 0.8968 | 1.0165 | -0.2382 |
| CHB | HIST2 | 149517689 | 0.2694 | 0.5082 | -0.7496 |
| CHB | HIST2 | 149522689 | 0.0097 | 0.1694 | -0.949  |
| CHB | HIST2 | 149527689 | 0.2578 | 0.1694 | 0.5253  |
| CHB | HIST2 | 149532689 | 0.2578 | 0.1694 | 0.5253  |
| CHB | HIST2 | 149537689 | 0      | 0      | 0       |
| CHB | HIST2 | 149542689 | 0      | 0      | 0       |
| CHB | HIST2 | 149547689 | 0      | 0      | 0       |
| CHB | HIST2 | 149552689 | 0      | 0      | 0       |
| CHB | HIST2 | 149557689 | 0      | 0      | 0       |
| CHB | HIST2 | 149562689 | 0      | 0      | 0       |
| CHB | HIST2 | 149567689 | 0.4601 | 0.3388 | 0.4866  |
| CHB | HIST2 | 149572689 | 0.9039 | 0.8471 | 0.1281  |
| CHB | HIST2 | 149577689 | 1.095  | 1.0165 | 0.1562  |
| CHB | HIST2 | 149582689 | 3.3082 | 3.3883 | -0.0631 |
| CHB | HIST2 | 149587689 | 3.4287 | 3.5577 | -0.0975 |
| CHB | HIST2 | 149592689 | 2.0525 | 1.6942 | 0.4917  |
| CHB | HIST2 | 149597689 | 2.9082 | 2.2024 | 0.7903  |
| CHB | HIST2 | 149602689 | 6.534  | 4.2354 | 1.4964  |
| CHB | HIST2 | 149607689 | 7.0862 | 5.4213 | 0.873   |
| CHB | HIST2 | 149612689 | 2.7537 | 2.8801 | -0.114  |
| CHB | HIST2 | 149617689 | 0.574  | 0.5082 | 0.2066  |
| CHB | HIST2 | 149622689 | 0      | 0      | 0       |
| CHB | HIST2 | 149627689 | 0.0097 | 0.1694 | -0.949  |
| CHB | HIST2 | 149632689 | 0.0097 | 0.1694 | -0.949  |
| CHB | HIST2 | 149637689 | 2.8808 | 1.5247 | 2.0147  |
| CHB | HIST2 | 149642689 | 4.7697 | 4.2354 | 0.3478  |
| CHB | HIST2 | 149647689 | 7.5328 | 6.7766 | 0.3246  |
| CHB | HIST2 | 149652689 | 6.6267 | 5.4213 | 0.6321  |

## 2\_TajimasD\_data

|     |       |           |        |        |         |
|-----|-------|-----------|--------|--------|---------|
| CHB | HIST2 | 149657689 | 3.0921 | 4.5742 | -0.9025 |
| CHB | HIST2 | 149662689 | 5.9966 | 5.4213 | 0.3017  |
| CHB | HIST2 | 149667689 | 8.2781 | 6.946  | 0.5592  |
| CHB | HIST2 | 149672689 | 8.1593 | 8.6402 | -0.1653 |
| CHB | HIST2 | 149677689 | 5.5639 | 6.0989 | -0.2525 |
| CHB | HIST2 | 149682689 | 2.9461 | 4.7436 | -1.0603 |
| CHB | HIST2 | 149687689 | 2.256  | 4.2354 | -1.2886 |
| CHB | HIST2 | 149692689 | 3.1883 | 4.066  | -0.5919 |
| CHB | HIST2 | 149697689 | 4.2125 | 4.5742 | -0.2202 |
| CHB | HIST2 | 149702689 | 6.1365 | 6.946  | -0.3398 |
| CHB | HIST2 | 149707689 | 8.0221 | 7.9625 | 0.0221  |
| CHB | HIST2 | 149712689 | 7.1178 | 6.4378 | 0.3058  |
| CHB | HIST2 | 149717689 | 7.4384 | 8.1319 | -0.2521 |
| CHB | HIST2 | 149722689 | 7.2953 | 8.6402 | -0.4623 |
| CHB | HIST2 | 149727689 | 7.0956 | 8.8096 | -0.5787 |
| CHB | HIST2 | 149732689 | 5.754  | 7.2848 | -0.6153 |
| CHB | HIST2 | 149737689 | 2.2852 | 4.066  | -1.2009 |
| CHB | HIST2 | 149742689 | 1.5443 | 3.0495 | -1.2945 |
| CHB | HIST2 | 149747689 | 3.8666 | 2.8801 | 0.8894  |
| CHB | HIST2 | 149752689 | 3.2732 | 2.8801 | 0.3544  |
| CHB | HIST2 | 149757689 | 1.1856 | 5.5907 | -2.2476 |
| CHB | HIST2 | 149762689 | 1.9924 | 6.6072 | -2.0269 |
| CHB | HIST2 | 149767689 | 2.1599 | 4.7436 | -1.5241 |
| CHB | HIST2 | 149772689 | 1.3202 | 5.9295 | -2.2314 |
| CHB | HIST2 | 149777689 | 0.7826 | 4.913  | -2.3626 |
| CHB | HIST2 | 149782689 | 1.0246 | 4.4048 | -2.127  |
| CHB | HIST2 | 149787689 | 0.744  | 5.7601 | -2.4921 |
| CHB | HIST2 | 149792689 | 0.4026 | 3.3883 | -2.3513 |
| CHB | HIST2 | 149797689 | 0.1513 | 0.5082 | -1.1204 |
| CHB | HIST2 | 149802689 | 0      | 0      | 0       |
| CHB | HIST2 | 149807689 | 0      | 0      | 0       |
| CHB | HIST2 | 149812689 | 0.4879 | 2.2024 | -1.9198 |
| CHB | HIST2 | 149817689 | 1.276  | 5.4213 | -2.1737 |
| CHB | HIST2 | 149822689 | 1.1542 | 3.3883 | -1.7594 |
| CHB | HIST2 | 149827689 | 0.3661 | 0.1694 | 1.1688  |
| CHB | HIST2 | 149832689 | 0      | 0      | 0       |
| CHB | HIST2 | 149837689 | 0      | 0      | 0       |
| CHB | HIST2 | 149842689 | 0.2878 | 1.8636 | -2.0105 |
| CHB | HIST2 | 149847689 | 0.6405 | 4.913  | -2.4439 |
| CHB | HIST2 | 149852689 | 0.8979 | 7.1154 | -2.5533 |
| CHB | HIST2 | 149857689 | 1.5561 | 6.4378 | -2.195  |
| CHB | HIST2 | 149862689 | 1.4534 | 6.6072 | -2.2636 |
| CHB | HIST2 | 149867689 | 0.9816 | 6.946  | -2.5036 |
| CHB | HIST2 | 149872689 | 1.0817 | 5.5907 | -2.3006 |
| CHB | HIST2 | 149877689 | 1.6012 | 6.6072 | -2.1987 |
| CHB | HIST2 | 149882689 | 1.7603 | 7.1154 | -2.1992 |
| CHB | HIST2 | 149887689 | 1.2762 | 5.7601 | -2.2277 |
| CHB | HIST2 | 149892689 | 1.5239 | 6.7766 | -2.2548 |
| CHB | HIST2 | 149897689 | 1.1626 | 7.2848 | -2.4609 |



## 2\_TajimasD\_data

|     |       |           |        |         |         |
|-----|-------|-----------|--------|---------|---------|
| CHB | HIST2 | 149902689 | 1.4296 | 6.946   | -2.3156 |
| CHB | HIST2 | 149907689 | 2.6127 | 8.1319  | -2.0061 |
| CHB | HIST2 | 149912689 | 1.5418 | 6.2684  | -2.1769 |
| CHB | HIST2 | 149917689 | 1.4919 | 6.7766  | -2.2685 |
| CHB | HIST2 | 149922689 | 3.5157 | 8.979   | -1.8123 |
| CHB | HIST2 | 149927689 | 3.9733 | 10.3343 | -1.8516 |
| CHB | HIST2 | 149932689 | 2.1807 | 10.3343 | -2.3734 |
| CHB | HIST2 | 149937689 | 2.0573 | 9.3178  | -2.3273 |
| CHB | HIST2 | 149942689 | 2.9528 | 7.9625  | -1.8564 |
| CHB | HIST2 | 149947689 | 2.0617 | 6.2684  | -1.9375 |
| CHB | HIST2 | 149952689 | 1.9979 | 8.3013  | -2.2481 |
| CHB | HIST2 | 149957689 | 1.6149 | 7.7931  | -2.335  |
| CHB | HIST2 | 149962689 | 0.988  | 5.9295  | -2.3923 |
| CHB | HIST2 | 149967689 | 1.1896 | 6.4378  | -2.3598 |
| CHB | HIST2 | 149972689 | 1.4017 | 5.2519  | -2.0765 |
| CHB | HIST2 | 149977689 | 1.9513 | 4.913   | -1.6941 |
| CHB | HIST2 | 149982689 | 2.2138 | 7.7931  | -2.1087 |
| CHB | HIST2 | 149987689 | 2.2511 | 9.9955  | -2.3255 |
| CHB | HIST2 | 149992689 | 3.9113 | 9.6567  | -1.7815 |
| CHB | HIST2 | 149997689 | 6.7367 | 10.5037 | -1.08   |
| CHB | HIST2 | 150002689 | 5.34   | 9.9955  | -1.398  |
| CHB | HIST2 | 150007689 | 2.9031 | 9.6567  | -2.0941 |
| CHB | HIST2 | 150012689 | 2.2269 | 10.5037 | -2.3729 |
| CHB | HIST2 | 150017689 | 1.4828 | 8.6402  | -2.4603 |
| CHB | HIST2 | 150022689 | 1.732  | 8.8096  | -2.3896 |
| CHB | HIST2 | 150027689 | 1.3954 | 8.6402  | -2.4903 |
| CHB | HIST2 | 150032689 | 1.1041 | 6.4378  | -2.3982 |
| CHB | HIST2 | 150037689 | 1.8289 | 6.6072  | -2.0987 |
| CHB | HIST2 | 150042689 | 1.9001 | 6.7766  | -2.0933 |
| CHB | HIST2 | 150047689 | 0.9341 | 6.7766  | -2.508  |
| CHB | HIST2 | 150052689 | 1.0657 | 6.6072  | -2.4339 |
| CHB | HIST2 | 150057689 | 1.1677 | 6.0989  | -2.3277 |
| CHB | HIST2 | 150062689 | 0.6227 | 5.0825  | -2.476  |
| CHB | HIST2 | 150067689 | 0.5625 | 4.913   | -2.4885 |
| CHB | HIST2 | 150072689 | 1.3189 | 7.4543  | -2.4151 |
| CHB | HIST2 | 150077689 | 1.3231 | 7.4543  | -2.4134 |
| CHB | HIST2 | 150082689 | 0.8818 | 5.2519  | -2.3569 |
| CHB | HIST2 | 150087689 | 1.351  | 6.2684  | -2.2648 |
| CHB | HIST2 | 150092689 | 1.5734 | 6.7766  | -2.2335 |
| CHB | HIST2 | 150097689 | 1.4826 | 6.2684  | -2.2042 |
| CHB | HIST2 | 150102689 | 1.6471 | 7.9625  | -2.3403 |
| CHB | HIST2 | 150107689 | 1.8193 | 7.9625  | -2.2765 |
| CHB | HIST2 | 150112689 | 1.419  | 6.2684  | -2.2335 |
| CHB | HIST2 | 150117689 | 1.3644 | 6.2684  | -2.2586 |
| CHB | HIST2 | 150122689 | 2.2237 | 7.6237  | -2.0824 |
| CHB | HIST2 | 150127689 | 2.64   | 8.1319  | -1.9962 |
| CHB | HIST2 | 150132689 | 2.1415 | 8.3013  | -2.1969 |
| CHB | HIST2 | 150137689 | 2.0311 | 9.4872  | -2.3503 |
| CHB | HIST2 | 150142689 | 2.6756 | 9.3178  | -2.1291 |

## 2\_TajimasD\_data

|     |       |           |         |         |         |
|-----|-------|-----------|---------|---------|---------|
| CHB | HIST2 | 150147689 | 2.7567  | 8.4708  | -2.0003 |
| CHB | HIST2 | 150152689 | 1.9176  | 8.8096  | -2.3269 |
| CHB | HIST2 | 150157689 | 2.7124  | 12.7061 | -2.3957 |
| CHB | HIST2 | 150162689 | 6.6899  | 12.5367 | -1.4195 |
| CHB | HIST2 | 150167689 | 10.2798 | 9.8261  | 0.1384  |
| CHB | HIST2 | 150172689 | 7.3381  | 10.1649 | -0.8356 |
| CHB | HIST2 | 150177689 | 5.1327  | 9.9955  | -1.4602 |
| CHB | HIST2 | 150182689 | 7.0729  | 9.3178  | -0.7196 |
| CHB | HIST2 | 150187689 | 4.4826  | 6.7766  | -0.9847 |
| CHB | HIST2 | 150192689 | 4.0677  | 6.7766  | -1.1628 |
| CHB | HIST2 | 150197689 | 8.1986  | 9.4872  | -0.4062 |
| CHB | HIST2 | 150202689 | 9.2675  | 10.1649 | -0.2653 |
| CHB | HIST2 | 150207689 | 8.6322  | 10.8426 | -0.6152 |
| CHB | HIST2 | 150212689 | 8.9313  | 11.8591 | -0.7491 |
| CHB | HIST2 | 150217689 | 7.8589  | 9.9955  | -0.6416 |
| CHB | HIST2 | 150222689 | 5.5802  | 8.3013  | -0.9705 |
| CHB | HIST2 | 150227689 | 2.9787  | 6.4378  | -1.5553 |
| CHB | HIST2 | 150232689 | 2.5696  | 4.4048  | -1.1548 |
| CHB | HIST2 | 150237689 | 3.3891  | 4.5742  | -0.7216 |
| CHB | HIST2 | 150242689 | 3.4205  | 5.7601  | -1.1624 |
| CHB | HIST2 | 150247689 | 5.0069  | 7.2848  | -0.9156 |
| CHB | HIST2 | 150252689 | 4.7007  | 7.7931  | -1.1688 |
| CHB | HIST2 | 150257689 | 7.4337  | 8.4708  | -0.3631 |
| CHB | HIST2 | 150262689 | 10.3708 | 9.9955  | 0.1127  |
| CHB | HIST2 | 150267689 | 12.8469 | 11.6896 | 0.3001  |
| CHB | HIST2 | 150272689 | 11.7183 | 11.1814 | 0.1452  |
| CHB | HIST2 | 150277689 | 8.2082  | 10.3343 | -0.6189 |
| CHB | HIST2 | 150282689 | 10.3698 | 12.0285 | -0.4187 |
| CHB | HIST2 | 150287689 | 10.2166 | 10.8426 | -0.1742 |
| CHB | HIST2 | 150292689 | 7.4507  | 8.6402  | -0.4089 |
| CHB | HIST2 | 150297689 | 4.8423  | 7.9625  | -1.1562 |
| CHB | HIST2 | 150302689 | 5.5199  | 8.3013  | -0.992  |
| YRI | HIST2 | 149287689 | 4.1276  | 4.7057  | -0.3422 |
| YRI | HIST2 | 149292689 | 4.3613  | 5.7141  | -0.6746 |
| YRI | HIST2 | 149297689 | 4.6328  | 5.5461  | -0.4677 |
| YRI | HIST2 | 149302689 | 2.7627  | 4.7057  | -1.1502 |
| YRI | HIST2 | 149307689 | 4.4592  | 5.2099  | -0.4063 |
| YRI | HIST2 | 149312689 | 3.6981  | 4.2016  | -0.3289 |
| YRI | HIST2 | 149317689 | 2.1341  | 2.8571  | -0.6538 |
| YRI | HIST2 | 149322689 | 3.3407  | 4.8738  | -0.88   |
| YRI | HIST2 | 149327689 | 3.4906  | 6.8906  | -1.4327 |
| YRI | HIST2 | 149332689 | 6.5221  | 8.067   | -0.5637 |
| YRI | HIST2 | 149337689 | 7.7992  | 10.4199 | -0.7544 |
| YRI | HIST2 | 149342689 | 6.5663  | 8.7392  | -0.7366 |
| YRI | HIST2 | 149347689 | 7.3879  | 8.9073  | -0.506  |
| YRI | HIST2 | 149352689 | 6.5304  | 8.4031  | -0.6582 |
| YRI | HIST2 | 149357689 | 5.9701  | 6.5544  | -0.2576 |
| YRI | HIST2 | 149362689 | 4.8751  | 7.0586  | -0.9001 |
| YRI | HIST2 | 149367689 | 3.0712  | 6.3864  | -1.4962 |

## 2\_TajimasD\_data

|     |       |           |        |        |         |
|-----|-------|-----------|--------|--------|---------|
| YRI | HIST2 | 149372689 | 3.3885 | 7.3947 | -1.5831 |
| YRI | HIST2 | 149377689 | 4.0781 | 7.5628 | -1.349  |
| YRI | HIST2 | 149382689 | 4.4672 | 5.7141 | -0.6218 |
| YRI | HIST2 | 149387689 | 6.215  | 6.0502 | 0.0781  |
| YRI | HIST2 | 149392689 | 6.7938 | 7.2267 | -0.1747 |
| YRI | HIST2 | 149397689 | 5.7216 | 7.3947 | -0.6611 |
| YRI | HIST2 | 149402689 | 7.2413 | 8.9073 | -0.5549 |
| YRI | HIST2 | 149407689 | 5.7873 | 8.5712 | -0.9607 |
| YRI | HIST2 | 149412689 | 5.3418 | 7.5628 | -0.8598 |
| YRI | HIST2 | 149417689 | 5.4578 | 5.7141 | -0.1278 |
| YRI | HIST2 | 149422689 | 2.9383 | 3.3612 | -0.3341 |
| YRI | HIST2 | 149427689 | 3.1793 | 4.2016 | -0.6678 |
| YRI | HIST2 | 149432689 | 2.5221 | 3.3612 | -0.6629 |
| YRI | HIST2 | 149437689 | 0.5529 | 1.0084 | -0.9081 |
| YRI | HIST2 | 149442689 | 0.0185 | 0.1681 | -0.8893 |
| YRI | HIST2 | 149447689 | 0.1568 | 0.5042 | -1.0918 |
| YRI | HIST2 | 149452689 | 0.4181 | 1.1764 | -1.3563 |
| YRI | HIST2 | 149457689 | 0.5682 | 1.5126 | -1.4063 |
| YRI | HIST2 | 149462689 | 0.3069 | 0.8403 | -1.2048 |
| YRI | HIST2 | 149467689 | 0      | 0      | 0       |
| YRI | HIST2 | 149472689 | 0      | 0      | 0       |
| YRI | HIST2 | 149477689 | 0      | 0      | 0       |
| YRI | HIST2 | 149482689 | 0      | 0      | 0       |
| YRI | HIST2 | 149487689 | 0      | 0      | 0       |
| YRI | HIST2 | 149492689 | 0      | 0      | 0       |
| YRI | HIST2 | 149497689 | 0      | 0      | 0       |
| YRI | HIST2 | 149502689 | 0      | 0      | 0       |
| YRI | HIST2 | 149507689 | 0.4018 | 0.5042 | -0.3218 |
| YRI | HIST2 | 149512689 | 0.6674 | 2.0167 | -1.6133 |
| YRI | HIST2 | 149517689 | 0.4991 | 2.0167 | -1.8145 |
| YRI | HIST2 | 149522689 | 0.2335 | 0.5042 | -0.8507 |
| YRI | HIST2 | 149527689 | 0.2339 | 0.5042 | -0.8495 |
| YRI | HIST2 | 149532689 | 0.2339 | 0.5042 | -0.8495 |
| YRI | HIST2 | 149537689 | 0      | 0      | 0       |
| YRI | HIST2 | 149542689 | 0      | 0      | 0       |
| YRI | HIST2 | 149547689 | 0      | 0      | 0       |
| YRI | HIST2 | 149552689 | 0      | 0      | 0       |
| YRI | HIST2 | 149557689 | 0      | 0      | 0       |
| YRI | HIST2 | 149562689 | 0      | 0      | 0       |
| YRI | HIST2 | 149567689 | 0.5133 | 0.5042 | 0.0286  |
| YRI | HIST2 | 149572689 | 1.1098 | 1.6806 | -0.7853 |
| YRI | HIST2 | 149577689 | 0.9289 | 1.6806 | -1.0341 |
| YRI | HIST2 | 149582689 | 2.3949 | 5.0419 | -1.4748 |
| YRI | HIST2 | 149587689 | 2.5004 | 5.5461 | -1.5597 |
| YRI | HIST2 | 149592689 | 1.2767 | 2.5209 | -1.246  |
| YRI | HIST2 | 149597689 | 2.5434 | 3.0251 | -0.4155 |
| YRI | HIST2 | 149602689 | 5.5452 | 5.8822 | -0.1638 |
| YRI | HIST2 | 149607689 | 5.9104 | 7.2267 | -0.5312 |
| YRI | HIST2 | 149612689 | 2.6056 | 3.6974 | -0.7958 |

## 2\_TajimasD\_data

|     |       |           |         |         |         |
|-----|-------|-----------|---------|---------|---------|
| YRI | HIST2 | 149617689 | 0.5357  | 0.8403  | -0.688  |
| YRI | HIST2 | 149622689 | 0       | 0       | 0       |
| YRI | HIST2 | 149627689 | 0.0093  | 0.1681  | -0.944  |
| YRI | HIST2 | 149632689 | 0.3282  | 0.6722  | -0.9006 |
| YRI | HIST2 | 149637689 | 3.1238  | 2.1848  | 1.0543  |
| YRI | HIST2 | 149642689 | 4.4903  | 4.7057  | -0.1275 |
| YRI | HIST2 | 149647689 | 8.5788  | 9.2434  | -0.2139 |
| YRI | HIST2 | 149652689 | 9.4155  | 10.4199 | -0.2891 |
| YRI | HIST2 | 149657689 | 5.7279  | 7.2267  | -0.6048 |
| YRI | HIST2 | 149662689 | 7.8662  | 8.067   | -0.0733 |
| YRI | HIST2 | 149667689 | 11.1589 | 14.1172 | -0.6397 |
| YRI | HIST2 | 149672689 | 10.1832 | 14.1172 | -0.8506 |
| YRI | HIST2 | 149677689 | 6.5119  | 9.5795  | -0.955  |
| YRI | HIST2 | 149682689 | 4.4768  | 9.0754  | -1.5053 |
| YRI | HIST2 | 149687689 | 2.4816  | 8.067   | -2.0381 |
| YRI | HIST2 | 149692689 | 3.0043  | 6.5544  | -1.5652 |
| YRI | HIST2 | 149697689 | 4.7508  | 7.2267  | -0.9991 |
| YRI | HIST2 | 149702689 | 8.2867  | 11.4282 | -0.8294 |
| YRI | HIST2 | 149707689 | 10.2015 | 13.613  | -0.7636 |
| YRI | HIST2 | 149712689 | 7.4268  | 10.924  | -0.9632 |
| YRI | HIST2 | 149717689 | 7.7001  | 11.7644 | -1.0441 |
| YRI | HIST2 | 149722689 | 8.826   | 12.6047 | -0.9096 |
| YRI | HIST2 | 149727689 | 9.2535  | 12.9408 | -0.8658 |
| YRI | HIST2 | 149732689 | 7.7238  | 12.4366 | -1.149  |
| YRI | HIST2 | 149737689 | 3.838   | 7.7309  | -1.4771 |
| YRI | HIST2 | 149742689 | 4.376   | 6.3864  | -0.9074 |
| YRI | HIST2 | 149747689 | 6.9734  | 7.7309  | -0.2874 |
| YRI | HIST2 | 149752689 | 5.9506  | 7.3947  | -0.5706 |
| YRI | HIST2 | 149757689 | 6.3799  | 9.7476  | -1.0317 |
| YRI | HIST2 | 149762689 | 6.0755  | 10.756  | -1.308  |
| YRI | HIST2 | 149767689 | 3.2155  | 9.2434  | -1.9399 |
| YRI | HIST2 | 149772689 | 5.4029  | 10.924  | -1.5206 |
| YRI | HIST2 | 149777689 | 6.5576  | 12.1005 | -1.3867 |
| YRI | HIST2 | 149782689 | 4.9324  | 13.2769 | -1.9124 |
| YRI | HIST2 | 149787689 | 4.1861  | 11.4282 | -1.9119 |
| YRI | HIST2 | 149792689 | 2.1767  | 5.2099  | -1.6418 |
| YRI | HIST2 | 149797689 | 0.2934  | 0.8403  | -1.2353 |
| YRI | HIST2 | 149802689 | 0       | 0       | 0       |
| YRI | HIST2 | 149807689 | 0       | 0       | 0       |
| YRI | HIST2 | 149812689 | 2.8529  | 5.2099  | -1.2758 |
| YRI | HIST2 | 149817689 | 5.0549  | 8.5712  | -1.2135 |
| YRI | HIST2 | 149822689 | 2.6837  | 3.5293  | -0.6411 |
| YRI | HIST2 | 149827689 | 0.4817  | 0.1681  | 1.8643  |
| YRI | HIST2 | 149832689 | 0       | 0       | 0       |
| YRI | HIST2 | 149837689 | 0.0183  | 0.1681  | -0.8905 |
| YRI | HIST2 | 149842689 | 1.4735  | 3.1932  | -1.4183 |
| YRI | HIST2 | 149847689 | 4.215   | 9.5795  | -1.6701 |
| YRI | HIST2 | 149852689 | 5.1135  | 13.445  | -1.8868 |
| YRI | HIST2 | 149857689 | 4.1301  | 11.9324 | -1.9779 |

## 2\_TajimasD\_data

|     |       |           |         |         |         |
|-----|-------|-----------|---------|---------|---------|
| YRI | HIST2 | 149862689 | 5.5321  | 11.5963 | -1.5792 |
| YRI | HIST2 | 149867689 | 7.5245  | 12.4366 | -1.1976 |
| YRI | HIST2 | 149872689 | 5.8643  | 10.756  | -1.367  |
| YRI | HIST2 | 149877689 | 7.0118  | 11.2602 | -1.1373 |
| YRI | HIST2 | 149882689 | 8.5046  | 11.7644 | -0.8375 |
| YRI | HIST2 | 149887689 | 5.7786  | 11.9324 | -1.56   |
| YRI | HIST2 | 149892689 | 5.2314  | 12.9408 | -1.8103 |
| YRI | HIST2 | 149897689 | 4.7192  | 13.1089 | -1.9461 |
| YRI | HIST2 | 149902689 | 3.7105  | 11.2602 | -2.0211 |
| YRI | HIST2 | 149907689 | 6.6539  | 11.5963 | -1.287  |
| YRI | HIST2 | 149912689 | 6.3756  | 12.1005 | -1.4323 |
| YRI | HIST2 | 149917689 | 5.752   | 12.6047 | -1.6496 |
| YRI | HIST2 | 149922689 | 7.5794  | 14.1172 | -1.4137 |
| YRI | HIST2 | 149927689 | 8.7358  | 13.7811 | -1.1162 |
| YRI | HIST2 | 149932689 | 9.4913  | 13.613  | -0.9225 |
| YRI | HIST2 | 149937689 | 8.7695  | 12.2685 | -0.8641 |
| YRI | HIST2 | 149942689 | 5.9611  | 8.9073  | -0.9813 |
| YRI | HIST2 | 149947689 | 4.4553  | 8.235   | -1.3533 |
| YRI | HIST2 | 149952689 | 8.4325  | 12.1005 | -0.9177 |
| YRI | HIST2 | 149957689 | 7.4836  | 11.2602 | -1.011  |
| YRI | HIST2 | 149962689 | 4.2266  | 8.5712  | -1.4993 |
| YRI | HIST2 | 149967689 | 6.5968  | 9.7476  | -0.9652 |
| YRI | HIST2 | 149972689 | 6.8664  | 9.2434  | -0.765  |
| YRI | HIST2 | 149977689 | 7.2876  | 9.7476  | -0.7536 |
| YRI | HIST2 | 149982689 | 9.4432  | 12.4366 | -0.7298 |
| YRI | HIST2 | 149987689 | 9.1385  | 11.9324 | -0.7082 |
| YRI | HIST2 | 149992689 | 8.9371  | 13.2769 | -0.9946 |
| YRI | HIST2 | 149997689 | 13.5133 | 15.4617 | -0.3864 |
| YRI | HIST2 | 150002689 | 13.5325 | 13.613  | -0.018  |
| YRI | HIST2 | 150007689 | 11.4365 | 15.7978 | -0.8472 |
| YRI | HIST2 | 150012689 | 15.8248 | 17.9827 | -0.3703 |
| YRI | HIST2 | 150017689 | 15.4784 | 15.1256 | 0.0714  |
| YRI | HIST2 | 150022689 | 13.2064 | 15.1256 | -0.3886 |
| YRI | HIST2 | 150027689 | 11.8021 | 14.1172 | -0.5006 |
| YRI | HIST2 | 150032689 | 8.8688  | 11.2602 | -0.6402 |
| YRI | HIST2 | 150037689 | 8.303   | 12.7727 | -1.0626 |
| YRI | HIST2 | 150042689 | 11.6426 | 14.7895 | -0.651  |
| YRI | HIST2 | 150047689 | 11.6029 | 14.7895 | -0.6592 |
| YRI | HIST2 | 150052689 | 7.9602  | 13.1089 | -1.1943 |
| YRI | HIST2 | 150057689 | 7.4345  | 12.6047 | -1.2446 |
| YRI | HIST2 | 150062689 | 8.7149  | 13.1089 | -1.0193 |
| YRI | HIST2 | 150067689 | 8.5175  | 12.2685 | -0.9263 |
| YRI | HIST2 | 150072689 | 10.401  | 14.4534 | -0.8569 |
| YRI | HIST2 | 150077689 | 12.0651 | 16.8062 | -0.8681 |
| YRI | HIST2 | 150082689 | 10.2687 | 15.1256 | -0.9835 |
| YRI | HIST2 | 150087689 | 13.0869 | 15.4617 | -0.4709 |
| YRI | HIST2 | 150092689 | 14.5781 | 15.7978 | -0.2369 |
| YRI | HIST2 | 150097689 | 11.3238 | 13.9492 | -0.5742 |
| YRI | HIST2 | 150102689 | 11.5213 | 15.1256 | -0.7298 |

## 2\_TajimasD\_data

|     |       |           |         |         |         |
|-----|-------|-----------|---------|---------|---------|
| YRI | HIST2 | 150107689 | 11.9195 | 16.8062 | -0.8948 |
| YRI | HIST2 | 150112689 | 9.0986  | 14.6214 | -1.155  |
| YRI | HIST2 | 150117689 | 7.3768  | 13.7811 | -1.4168 |
| YRI | HIST2 | 150122689 | 8.5138  | 15.2937 | -1.3585 |
| YRI | HIST2 | 150127689 | 10.358  | 15.2937 | -0.989  |
| YRI | HIST2 | 150132689 | 11.0102 | 15.6298 | -0.9066 |
| YRI | HIST2 | 150137689 | 12.5614 | 17.4785 | -0.8672 |
| YRI | HIST2 | 150142689 | 11.6407 | 15.9659 | -0.8318 |
| YRI | HIST2 | 150147689 | 7.9015  | 11.7644 | -0.9924 |
| YRI | HIST2 | 150152689 | 10.1963 | 13.613  | -0.7647 |
| YRI | HIST2 | 150157689 | 17.2033 | 19.3272 | -0.3401 |
| YRI | HIST2 | 150162689 | 16.2985 | 18.823  | -0.4146 |
| YRI | HIST2 | 150167689 | 13.4431 | 16.134  | -0.5123 |
| YRI | HIST2 | 150172689 | 12.7297 | 15.7978 | -0.596  |
| YRI | HIST2 | 150177689 | 11.0689 | 14.6214 | -0.7429 |
| YRI | HIST2 | 150182689 | 11.6681 | 14.1172 | -0.5296 |
| YRI | HIST2 | 150187689 | 9.2865  | 12.1005 | -0.704  |
| YRI | HIST2 | 150192689 | 8.856   | 11.0921 | -0.6071 |
| YRI | HIST2 | 150197689 | 10.8715 | 11.2602 | -0.1041 |
| YRI | HIST2 | 150202689 | 11.4618 | 11.2602 | 0.054   |
| YRI | HIST2 | 150207689 | 12.7787 | 13.613  | -0.1867 |
| YRI | HIST2 | 150212689 | 13.5415 | 14.9575 | -0.2898 |
| YRI | HIST2 | 150217689 | 12.1199 | 13.2769 | -0.2652 |
| YRI | HIST2 | 150222689 | 8.8104  | 10.2518 | -0.4213 |
| YRI | HIST2 | 150227689 | 4.4688  | 8.4031  | -1.3827 |
| YRI | HIST2 | 150232689 | 3.5175  | 7.7309  | -1.5987 |
| YRI | HIST2 | 150237689 | 3.6382  | 6.7225  | -1.329  |
| YRI | HIST2 | 150242689 | 4.4049  | 9.2434  | -1.5572 |
| YRI | HIST2 | 150247689 | 6.5472  | 11.0921 | -1.234  |
| YRI | HIST2 | 150252689 | 6.678   | 10.2518 | -1.0445 |
| YRI | HIST2 | 150257689 | 10.2802 | 10.5879 | -0.0873 |
| YRI | HIST2 | 150262689 | 14.7909 | 13.1089 | 0.3902  |
| YRI | HIST2 | 150267689 | 18.5391 | 16.9743 | 0.2838  |
| YRI | HIST2 | 150272689 | 16.8153 | 16.9743 | -0.0288 |
| YRI | HIST2 | 150277689 | 13.3488 | 14.9575 | -0.3292 |
| YRI | HIST2 | 150282689 | 12.6911 | 14.4534 | -0.3726 |
| YRI | HIST2 | 150287689 | 10.99   | 13.1089 | -0.4915 |
| YRI | HIST2 | 150292689 | 10.3046 | 11.9324 | -0.4126 |
| YRI | HIST2 | 150297689 | 9.3925  | 12.1005 | -0.6775 |
| YRI | HIST2 | 150302689 | 10.5637 | 11.9324 | -0.347  |
| CEU | HIST2 | 149318225 | 2.3018  | 2.2173  | 0.0944  |
| CEU | HIST2 | 149323225 | 3.1142  | 1.7056  | 1.9292  |
| CEU | HIST2 | 149328225 | 3.3034  | 3.0701  | 0.2001  |
| CEU | HIST2 | 149333225 | 6.0917  | 6.9931  | -0.3772 |
| CEU | HIST2 | 149338225 | 7.1942  | 8.3576  | -0.4136 |
| CEU | HIST2 | 149343225 | 5.9994  | 5.6286  | 0.1886  |
| CEU | HIST2 | 149348225 | 6.2315  | 5.7991  | 0.2142  |
| CEU | HIST2 | 149353225 | 5.6125  | 6.3108  | -0.3206 |
| CEU | HIST2 | 149358225 | 5.6349  | 5.6286  | 0.0032  |

## 2\_TajimasD\_data

|     |       |           |        |        |         |
|-----|-------|-----------|--------|--------|---------|
| CEU | HIST2 | 149363225 | 5.699  | 4.9463 | 0.4293  |
| CEU | HIST2 | 149368225 | 3.5393 | 3.5818 | -0.032  |
| CEU | HIST2 | 149373225 | 2.9417 | 4.7757 | -1.0786 |
| CEU | HIST2 | 149378225 | 3.5661 | 5.1169 | -0.8584 |
| CEU | HIST2 | 149383225 | 4.4593 | 4.4346 | 0.0155  |
| CEU | HIST2 | 149388225 | 5.8295 | 5.1169 | 0.3944  |
| CEU | HIST2 | 149393225 | 5.5702 | 5.458  | 0.0587  |
| CEU | HIST2 | 149398225 | 4.6601 | 5.6286 | -0.4926 |
| CEU | HIST2 | 149403225 | 6.0439 | 6.1402 | -0.0453 |
| CEU | HIST2 | 149408225 | 5.0012 | 4.4346 | 0.3555  |
| CEU | HIST2 | 149413225 | 4.7126 | 3.4112 | 1.0221  |
| CEU | HIST2 | 149418225 | 4.449  | 3.2407 | 0.9908  |
| CEU | HIST2 | 149423225 | 1.9637 | 1.8762 | 0.1114  |
| CEU | HIST2 | 149428225 | 2.3816 | 2.8996 | -0.4659 |
| CEU | HIST2 | 149433225 | 1.7838 | 2.2173 | -0.4843 |
| CEU | HIST2 | 149438225 | 0.0101 | 0.1706 | -0.9534 |
| CEU | HIST2 | 149443225 | 0      | 0      | 0       |
| CEU | HIST2 | 149448225 | 0.08   | 0.5117 | -1.3539 |
| CEU | HIST2 | 149453225 | 0.1979 | 1.0234 | -1.6403 |
| CEU | HIST2 | 149458225 | 0.128  | 0.6822 | -1.4472 |
| CEU | HIST2 | 149463225 | 0.0101 | 0.1706 | -0.9534 |
| CEU | HIST2 | 149468225 | 0      | 0      | 0       |
| CEU | HIST2 | 149473225 | 0      | 0      | 0       |
| CEU | HIST2 | 149478225 | 0      | 0      | 0       |
| CEU | HIST2 | 149483225 | 0      | 0      | 0       |
| CEU | HIST2 | 149488225 | 0      | 0      | 0       |
| CEU | HIST2 | 149493225 | 0      | 0      | 0       |
| CEU | HIST2 | 149498225 | 0      | 0      | 0       |
| CEU | HIST2 | 149503225 | 0      | 0      | 0       |
| CEU | HIST2 | 149508225 | 0.1363 | 0.5117 | -1.1774 |
| CEU | HIST2 | 149513225 | 0.4605 | 1.1939 | -1.3069 |
| CEU | HIST2 | 149518225 | 0.3243 | 0.6822 | -0.9346 |
| CEU | HIST2 | 149523225 | 0      | 0      | 0       |
| CEU | HIST2 | 149528225 | 0.0101 | 0.1706 | -0.9534 |
| CEU | HIST2 | 149533225 | 0.0101 | 0.1706 | -0.9534 |
| CEU | HIST2 | 149538225 | 0      | 0      | 0       |
| CEU | HIST2 | 149543225 | 0      | 0      | 0       |
| CEU | HIST2 | 149548225 | 0      | 0      | 0       |
| CEU | HIST2 | 149553225 | 0      | 0      | 0       |
| CEU | HIST2 | 149558225 | 0      | 0      | 0       |
| CEU | HIST2 | 149563225 | 0      | 0      | 0       |
| CEU | HIST2 | 149568225 | 0.6005 | 0.3411 | 1.0399  |
| CEU | HIST2 | 149573225 | 0.885  | 0.6822 | 0.5296  |
| CEU | HIST2 | 149578225 | 0.3939 | 1.0234 | -1.2508 |
| CEU | HIST2 | 149583225 | 2.8182 | 3.2407 | -0.3464 |
| CEU | HIST2 | 149588225 | 3.6906 | 3.0701 | 0.5323  |
| CEU | HIST2 | 149593225 | 2.1459 | 2.0467 | 0.118   |
| CEU | HIST2 | 149598225 | 3.4073 | 3.2407 | 0.1366  |
| CEU | HIST2 | 149603225 | 6.8606 | 4.9463 | 1.0917  |

## 2\_TajimasD\_data

|     |       |           |         |         |         |
|-----|-------|-----------|---------|---------|---------|
| CEU | HIST2 | 149608225 | 6.5675  | 4.4346  | 1.3383  |
| CEU | HIST2 | 149613225 | 2.7941  | 1.7056  | 1.4908  |
| CEU | HIST2 | 149618225 | 0.8439  | 0.5117  | 1.0419  |
| CEU | HIST2 | 149623225 | 0       | 0       | 0       |
| CEU | HIST2 | 149628225 | 0.0301  | 0.1706  | -0.8346 |
| CEU | HIST2 | 149633225 | 0.0503  | 0.5117  | -1.4471 |
| CEU | HIST2 | 149638225 | 2.3997  | 1.7056  | 0.9507  |
| CEU | HIST2 | 149643225 | 4.7056  | 3.9229  | 0.5459  |
| CEU | HIST2 | 149648225 | 7.9742  | 6.8225  | 0.4928  |
| CEU | HIST2 | 149653225 | 8.1868  | 6.1402  | 0.9631  |
| CEU | HIST2 | 149658225 | 4.5382  | 3.9229  | 0.4292  |
| CEU | HIST2 | 149663225 | 4.7986  | 6.1402  | -0.6313 |
| CEU | HIST2 | 149668225 | 5.228   | 10.0632 | -1.447  |
| CEU | HIST2 | 149673225 | 5.4397  | 9.2104  | -1.2253 |
| CEU | HIST2 | 149678225 | 4.8332  | 6.1402  | -0.615  |
| CEU | HIST2 | 149683225 | 2.4888  | 4.4346  | -1.2209 |
| CEU | HIST2 | 149688225 | 0.9285  | 3.2407  | -1.896  |
| CEU | HIST2 | 149693225 | 1.362   | 3.5818  | -1.6731 |
| CEU | HIST2 | 149698225 | 3.4795  | 5.7991  | -1.1489 |
| CEU | HIST2 | 149703225 | 5.2746  | 6.9931  | -0.7191 |
| CEU | HIST2 | 149708225 | 7.6066  | 6.9931  | 0.2567  |
| CEU | HIST2 | 149713225 | 10.7902 | 8.3576  | 0.8647  |
| CEU | HIST2 | 149718225 | 10.9326 | 8.187   | 0.9947  |
| CEU | HIST2 | 149723225 | 7.2799  | 6.3108  | 0.4449  |
| CEU | HIST2 | 149728225 | 6.4432  | 6.1402  | 0.1426  |
| CEU | HIST2 | 149733225 | 6.1517  | 5.7991  | 0.1746  |
| CEU | HIST2 | 149738225 | 3.1814  | 3.7524  | -0.4137 |
| CEU | HIST2 | 149743225 | 2.2533  | 2.729   | -0.4496 |
| CEU | HIST2 | 149748225 | 4.2958  | 3.5818  | 0.5381  |
| CEU | HIST2 | 149753225 | 3.5908  | 3.4112  | 0.1411  |
| CEU | HIST2 | 149758225 | 1.8874  | 3.5818  | -1.2771 |
| CEU | HIST2 | 149763225 | 2.1659  | 5.1169  | -1.6334 |
| CEU | HIST2 | 149768225 | 2.5351  | 5.2874  | -1.4799 |
| CEU | HIST2 | 149773225 | 3.7594  | 6.3108  | -1.1714 |
| CEU | HIST2 | 149778225 | 5.0441  | 7.5047  | -0.9654 |
| CEU | HIST2 | 149783225 | 5.1115  | 7.8459  | -1.0301 |
| CEU | HIST2 | 149788225 | 3.2696  | 6.1402  | -1.3508 |
| CEU | HIST2 | 149793225 | 1.1981  | 2.2173  | -1.1386 |
| CEU | HIST2 | 149798225 | 0       | 0       | 0       |
| CEU | HIST2 | 149803225 | 0       | 0       | 0       |
| CEU | HIST2 | 149808225 | 0       | 0       | 0       |
| CEU | HIST2 | 149813225 | 1.7827  | 2.3879  | -0.6373 |
| CEU | HIST2 | 149818225 | 2.7071  | 4.2641  | -1.0107 |
| CEU | HIST2 | 149823225 | 1.4236  | 2.0467  | -0.7414 |
| CEU | HIST2 | 149828225 | 0.4993  | 0.1706  | 1.9525  |
| CEU | HIST2 | 149833225 | 0       | 0       | 0       |
| CEU | HIST2 | 149838225 | 0       | 0       | 0       |
| CEU | HIST2 | 149843225 | 1.2872  | 2.2173  | -1.0391 |
| CEU | HIST2 | 149848225 | 2.3686  | 4.4346  | -1.2963 |



## 2\_TajimasD\_data

|     |       |           |         |        |         |
|-----|-------|-----------|---------|--------|---------|
| CEU | HIST2 | 149853225 | 2.053   | 5.1169 | -1.6959 |
| CEU | HIST2 | 149858225 | 3.0495  | 6.8225 | -1.6145 |
| CEU | HIST2 | 149863225 | 4.548   | 7.8459 | -1.2424 |
| CEU | HIST2 | 149868225 | 4.9739  | 8.5281 | -1.2401 |
| CEU | HIST2 | 149873225 | 4.0303  | 6.4814 | -1.0986 |
| CEU | HIST2 | 149878225 | 3.7207  | 6.1402 | -1.1385 |
| CEU | HIST2 | 149883225 | 2.7013  | 5.2874 | -1.3906 |
| CEU | HIST2 | 149888225 | 2.603   | 3.5818 | -0.7377 |
| CEU | HIST2 | 149893225 | 3.8856  | 5.6286 | -0.8866 |
| CEU | HIST2 | 149898225 | 3.3659  | 5.6286 | -1.1509 |
| CEU | HIST2 | 149903225 | 4.126   | 5.9697 | -0.8898 |
| CEU | HIST2 | 149908225 | 3.4735  | 5.2874 | -0.9753 |
| CEU | HIST2 | 149913225 | 1.2511  | 3.5818 | -1.7566 |
| CEU | HIST2 | 149918225 | 2.2224  | 4.2641 | -1.3254 |
| CEU | HIST2 | 149923225 | 3.7423  | 5.2874 | -0.8308 |
| CEU | HIST2 | 149928225 | 3.8543  | 5.7991 | -0.9632 |
| CEU | HIST2 | 149933225 | 2.45    | 5.458  | -1.5725 |
| CEU | HIST2 | 149938225 | 2.0338  | 4.4346 | -1.5063 |
| CEU | HIST2 | 149943225 | 2.7784  | 3.7524 | -0.7056 |
| CEU | HIST2 | 149948225 | 2.1206  | 4.0935 | -1.3266 |
| CEU | HIST2 | 149953225 | 2.8042  | 5.6286 | -1.4367 |
| CEU | HIST2 | 149958225 | 2.2919  | 4.7757 | -1.4608 |
| CEU | HIST2 | 149963225 | 1.2185  | 2.729  | -1.4277 |
| CEU | HIST2 | 149968225 | 2.1701  | 3.2407 | -0.8779 |
| CEU | HIST2 | 149973225 | 2.2014  | 3.9229 | -1.2007 |
| CEU | HIST2 | 149978225 | 2.2138  | 4.4346 | -1.3934 |
| CEU | HIST2 | 149983225 | 3.5459  | 5.6286 | -1.0594 |
| CEU | HIST2 | 149988225 | 4.0167  | 5.7991 | -0.8828 |
| CEU | HIST2 | 149993225 | 5.4251  | 7.1636 | -0.7117 |
| CEU | HIST2 | 149998225 | 9.7349  | 8.6987 | 0.355   |
| CEU | HIST2 | 150003225 | 8.577   | 6.6519 | 0.8428  |
| CEU | HIST2 | 150008225 | 7.9959  | 7.5047 | 0.1927  |
| CEU | HIST2 | 150013225 | 11.0676 | 9.7221 | 0.4158  |
| CEU | HIST2 | 150018225 | 10.0734 | 8.3576 | 0.6099  |
| CEU | HIST2 | 150023225 | 8.5648  | 7.3342 | 0.4931  |
| CEU | HIST2 | 150028225 | 5.368   | 5.9697 | -0.2904 |
| CEU | HIST2 | 150033225 | 2.2319  | 4.4346 | -1.382  |
| CEU | HIST2 | 150038225 | 2.8551  | 5.6286 | -1.4108 |
| CEU | HIST2 | 150043225 | 4.2235  | 6.6519 | -1.0632 |
| CEU | HIST2 | 150048225 | 4.3154  | 5.2874 | -0.5226 |
| CEU | HIST2 | 150053225 | 2.8961  | 4.4346 | -0.9653 |
| CEU | HIST2 | 150058225 | 2.4185  | 4.6052 | -1.3276 |
| CEU | HIST2 | 150063225 | 3.2917  | 5.1169 | -1.0103 |
| CEU | HIST2 | 150068225 | 1.987   | 3.2407 | -1.028  |
| CEU | HIST2 | 150073225 | 5.6081  | 5.6286 | -0.0104 |
| CEU | HIST2 | 150078225 | 7.457   | 8.0164 | -0.2066 |
| CEU | HIST2 | 150083225 | 3.3999  | 5.6286 | -1.1337 |
| CEU | HIST2 | 150088225 | 3.6172  | 6.9931 | -1.4125 |
| CEU | HIST2 | 150093225 | 4.3137  | 6.4814 | -0.9716 |

## 2\_TajimasD\_data

|     |       |           |         |         |         |
|-----|-------|-----------|---------|---------|---------|
| CEU | HIST2 | 150098225 | 3.435   | 4.4346  | -0.6272 |
| CEU | HIST2 | 150103225 | 4.5578  | 6.6519  | -0.9168 |
| CEU | HIST2 | 150108225 | 6.563   | 7.3342  | -0.309  |
| CEU | HIST2 | 150113225 | 5.1983  | 5.6286  | -0.2189 |
| CEU | HIST2 | 150118225 | 3.0588  | 4.9463  | -1.0764 |
| CEU | HIST2 | 150123225 | 3.6353  | 6.3108  | -1.2284 |
| CEU | HIST2 | 150128225 | 5.9878  | 8.5281  | -0.8863 |
| CEU | HIST2 | 150133225 | 6.5949  | 9.2104  | -0.8499 |
| CEU | HIST2 | 150138225 | 6.6069  | 11.2571 | -1.253  |
| CEU | HIST2 | 150143225 | 6.4964  | 9.3809  | -0.9215 |
| CEU | HIST2 | 150148225 | 4.8918  | 6.3108  | -0.6515 |
| CEU | HIST2 | 150153225 | 3.6945  | 7.3342  | -1.4583 |
| CEU | HIST2 | 150158225 | 4.7576  | 9.2104  | -1.4469 |
| CEU | HIST2 | 150163225 | 9.1387  | 9.5515  | -0.1297 |
| CEU | HIST2 | 150168225 | 10.4315 | 8.187   | 0.8131  |
| CEU | HIST2 | 150173225 | 7.3634  | 6.6519  | 0.3115  |
| CEU | HIST2 | 150178225 | 6.643   | 5.2874  | 0.7289  |
| CEU | HIST2 | 150183225 | 7.6821  | 6.1402  | 0.7256  |
| CEU | HIST2 | 150188225 | 6.0486  | 6.4814  | -0.194  |
| CEU | HIST2 | 150193225 | 5.3088  | 5.6286  | -0.1627 |
| CEU | HIST2 | 150198225 | 8.3972  | 6.4814  | 0.8587  |
| CEU | HIST2 | 150203225 | 9.3395  | 7.8459  | 0.5627  |
| CEU | HIST2 | 150208225 | 9.1899  | 8.3576  | 0.2959  |
| CEU | HIST2 | 150213225 | 9.8248  | 7.3342  | 0.9979  |
| CEU | HIST2 | 150218225 | 8.2554  | 6.1402  | 0.9954  |
| CEU | HIST2 | 150223225 | 6.1936  | 5.9697  | 0.1081  |
| CEU | HIST2 | 150228225 | 3.3274  | 4.4346  | -0.6947 |
| CEU | HIST2 | 150233225 | 2.6514  | 3.0701  | -0.3592 |
| CEU | HIST2 | 150238225 | 3.6852  | 3.5818  | 0.0779  |
| CEU | HIST2 | 150243225 | 3.3667  | 4.4346  | -0.67   |
| CEU | HIST2 | 150248225 | 5.3434  | 4.7757  | 0.3339  |
| CEU | HIST2 | 150253225 | 6.5502  | 5.9697  | 0.2802  |
| CEU | HIST2 | 150258225 | 8.7749  | 7.8459  | 0.35    |
| CEU | HIST2 | 150263225 | 13.2997 | 8.0164  | 1.9514  |
| CEU | HIST2 | 150268225 | 18.5523 | 10.5749 | 2.2793  |
| CEU | HIST2 | 150273225 | 16.718  | 11.7688 | 1.279   |
| CEU | HIST2 | 150278225 | 14.8289 | 11.0866 | 1.0229  |
| CEU | HIST2 | 150283225 | 15.4127 | 10.5749 | 1.3822  |
| CEU | HIST2 | 150288225 | 12.5706 | 8.3576  | 1.4976  |
| CEU | HIST2 | 150293225 | 10.4645 | 7.8459  | 0.9865  |
| CEU | HIST2 | 150298225 | 6.855   | 6.4814  | 0.1675  |
| CEU | HIST2 | 150303225 | 8.1971  | 7.3342  | 0.3457  |
| CEU | HIST2 | 150308225 | 10.564  | 9.7221  | 0.2602  |
| CHB | HIST2 | 149318225 | 1.9838  | 2.7106  | -0.6887 |
| CHB | HIST2 | 149323225 | 2.3238  | 2.7106  | -0.3665 |
| CHB | HIST2 | 149328225 | 3.1131  | 5.9295  | -1.3635 |
| CHB | HIST2 | 149333225 | 5.8784  | 8.3013  | -0.8641 |
| CHB | HIST2 | 149338225 | 6.2412  | 7.9625  | -0.6379 |
| CHB | HIST2 | 149343225 | 5.8039  | 7.1154  | -0.5386 |

## 2\_TajimasD\_data

|     |       |           |        |        |         |
|-----|-------|-----------|--------|--------|---------|
| CHB | HIST2 | 149348225 | 5.6497 | 7.6237 | -0.7612 |
| CHB | HIST2 | 149353225 | 4.5307 | 6.6072 | -0.912  |
| CHB | HIST2 | 149358225 | 5.1121 | 4.7436 | 0.2174  |
| CHB | HIST2 | 149363225 | 5.0194 | 4.4048 | 0.3867  |
| CHB | HIST2 | 149368225 | 2.8193 | 4.5742 | -1.0686 |
| CHB | HIST2 | 149373225 | 1.9473 | 5.0825 | -1.7406 |
| CHB | HIST2 | 149378225 | 2.6528 | 4.2354 | -1.0303 |
| CHB | HIST2 | 149383225 | 3.6038 | 4.2354 | -0.4112 |
| CHB | HIST2 | 149388225 | 4.5578 | 5.9295 | -0.6641 |
| CHB | HIST2 | 149393225 | 4.3503 | 5.0825 | -0.4065 |
| CHB | HIST2 | 149398225 | 3.9874 | 5.2519 | -0.682  |
| CHB | HIST2 | 149403225 | 4.9162 | 6.946  | -0.852  |
| CHB | HIST2 | 149408225 | 3.5174 | 4.7436 | -0.7233 |
| CHB | HIST2 | 149413225 | 4.3154 | 4.5742 | -0.1576 |
| CHB | HIST2 | 149418225 | 4.2381 | 4.913  | -0.386  |
| CHB | HIST2 | 149423225 | 1.3975 | 3.2189 | -1.4974 |
| CHB | HIST2 | 149428225 | 1.9442 | 3.8965 | -1.3655 |
| CHB | HIST2 | 149433225 | 1.5755 | 2.5412 | -0.9643 |
| CHB | HIST2 | 149438225 | 0.0097 | 0.1694 | -0.949  |
| CHB | HIST2 | 149443225 | 0      | 0      | 0       |
| CHB | HIST2 | 149448225 | 0.0386 | 0.5082 | -1.4741 |
| CHB | HIST2 | 149453225 | 0.1162 | 1.5247 | -2.0925 |
| CHB | HIST2 | 149458225 | 0.0873 | 1.1859 | -1.961  |
| CHB | HIST2 | 149463225 | 0.0097 | 0.1694 | -0.949  |
| CHB | HIST2 | 149468225 | 0      | 0      | 0       |
| CHB | HIST2 | 149473225 | 0      | 0      | 0       |
| CHB | HIST2 | 149478225 | 0      | 0      | 0       |
| CHB | HIST2 | 149483225 | 0      | 0      | 0       |
| CHB | HIST2 | 149488225 | 0      | 0      | 0       |
| CHB | HIST2 | 149493225 | 0      | 0      | 0       |
| CHB | HIST2 | 149498225 | 0      | 0      | 0       |
| CHB | HIST2 | 149503225 | 0      | 0      | 0       |
| CHB | HIST2 | 149508225 | 0.6372 | 0.6777 | -0.1059 |
| CHB | HIST2 | 149513225 | 0.9065 | 1.1859 | -0.4987 |
| CHB | HIST2 | 149518225 | 0.2694 | 0.5082 | -0.7496 |
| CHB | HIST2 | 149523225 | 0      | 0      | 0       |
| CHB | HIST2 | 149528225 | 0.2578 | 0.1694 | 0.5253  |
| CHB | HIST2 | 149533225 | 0.2578 | 0.1694 | 0.5253  |
| CHB | HIST2 | 149538225 | 0      | 0      | 0       |
| CHB | HIST2 | 149543225 | 0      | 0      | 0       |
| CHB | HIST2 | 149548225 | 0      | 0      | 0       |
| CHB | HIST2 | 149553225 | 0      | 0      | 0       |
| CHB | HIST2 | 149558225 | 0      | 0      | 0       |
| CHB | HIST2 | 149563225 | 0      | 0      | 0       |
| CHB | HIST2 | 149568225 | 0.4891 | 0.5082 | -0.06   |
| CHB | HIST2 | 149573225 | 0.9039 | 0.8471 | 0.1281  |
| CHB | HIST2 | 149578225 | 1.4257 | 1.1859 | 0.428   |
| CHB | HIST2 | 149583225 | 3.3082 | 3.3883 | -0.0631 |
| CHB | HIST2 | 149588225 | 3.0691 | 3.2189 | -0.1232 |

## 2\_TajimasD\_data

|     |       |           |        |        |         |
|-----|-------|-----------|--------|--------|---------|
| CHB | HIST2 | 149593225 | 2.0525 | 1.6942 | 0.4917  |
| CHB | HIST2 | 149598225 | 3.8962 | 2.5412 | 1.3531  |
| CHB | HIST2 | 149603225 | 7.5197 | 4.5742 | 1.7936  |
| CHB | HIST2 | 149608225 | 6.0982 | 5.0825 | 0.5639  |
| CHB | HIST2 | 149613225 | 1.7679 | 2.5412 | -0.7722 |
| CHB | HIST2 | 149618225 | 0.574  | 0.5082 | 0.2066  |
| CHB | HIST2 | 149623225 | 0      | 0      | 0       |
| CHB | HIST2 | 149628225 | 0.0097 | 0.1694 | -0.949  |
| CHB | HIST2 | 149633225 | 0.0097 | 0.1694 | -0.949  |
| CHB | HIST2 | 149638225 | 2.8808 | 1.5247 | 2.0147  |
| CHB | HIST2 | 149643225 | 5.534  | 4.7436 | 0.4662  |
| CHB | HIST2 | 149648225 | 7.8298 | 7.2848 | 0.2191  |
| CHB | HIST2 | 149653225 | 6.9298 | 5.9295 | 0.4843  |
| CHB | HIST2 | 149658225 | 3.3567 | 4.4048 | -0.6595 |
| CHB | HIST2 | 149663225 | 5.8429 | 5.0825 | 0.4222  |
| CHB | HIST2 | 149668225 | 8.4805 | 7.6237 | 0.3304  |
| CHB | HIST2 | 149673225 | 7.5292 | 8.1319 | -0.2191 |
| CHB | HIST2 | 149678225 | 4.7999 | 5.0825 | -0.1569 |
| CHB | HIST2 | 149683225 | 2.6722 | 4.7436 | -1.2219 |
| CHB | HIST2 | 149688225 | 2.3229 | 4.5742 | -1.3709 |
| CHB | HIST2 | 149693225 | 3.497  | 4.4048 | -0.5712 |
| CHB | HIST2 | 149698225 | 5.2147 | 4.913  | 0.1726  |
| CHB | HIST2 | 149703225 | 5.8565 | 6.6072 | -0.3297 |
| CHB | HIST2 | 149708225 | 6.9815 | 7.4543 | -0.1861 |
| CHB | HIST2 | 149713225 | 8.423  | 7.2848 | 0.4575  |
| CHB | HIST2 | 149718225 | 8.151  | 8.4708 | -0.112  |
| CHB | HIST2 | 149723225 | 5.9903 | 8.1319 | -0.7784 |
| CHB | HIST2 | 149728225 | 6.3545 | 8.3013 | -0.6943 |
| CHB | HIST2 | 149733225 | 5.8551 | 7.2848 | -0.5747 |
| CHB | HIST2 | 149738225 | 2.396  | 4.2354 | -1.1975 |
| CHB | HIST2 | 149743225 | 1.4142 | 2.7106 | -1.2284 |
| CHB | HIST2 | 149748225 | 3.7558 | 2.7106 | 0.9904  |
| CHB | HIST2 | 149753225 | 3.2829 | 3.0495 | 0.2007  |
| CHB | HIST2 | 149758225 | 1.2983 | 6.0989 | -2.2661 |
| CHB | HIST2 | 149763225 | 1.973  | 6.2684 | -1.9783 |
| CHB | HIST2 | 149768225 | 2.1232 | 4.5742 | -1.4925 |
| CHB | HIST2 | 149773225 | 1.5264 | 6.0989 | -2.1584 |
| CHB | HIST2 | 149778225 | 1.016  | 5.2519 | -2.2846 |
| CHB | HIST2 | 149783225 | 0.8184 | 4.2354 | -2.2245 |
| CHB | HIST2 | 149788225 | 0.586  | 5.5907 | -2.5535 |
| CHB | HIST2 | 149793225 | 0.4026 | 3.3883 | -2.3513 |
| CHB | HIST2 | 149798225 | 0      | 0      | 0       |
| CHB | HIST2 | 149803225 | 0      | 0      | 0       |
| CHB | HIST2 | 149808225 | 0      | 0      | 0       |
| CHB | HIST2 | 149813225 | 0.4976 | 2.3718 | -1.9784 |
| CHB | HIST2 | 149818225 | 1.276  | 5.4213 | -2.1737 |
| CHB | HIST2 | 149823225 | 1.1445 | 3.2189 | -1.7054 |
| CHB | HIST2 | 149828225 | 0.3661 | 0.1694 | 1.1688  |
| CHB | HIST2 | 149833225 | 0      | 0      | 0       |

## 2\_TajimasD\_data

|     |       |           |        |         |         |
|-----|-------|-----------|--------|---------|---------|
| CHB | HIST2 | 149838225 | 0      | 0       | 0       |
| CHB | HIST2 | 149843225 | 0.3553 | 2.3718  | -2.1286 |
| CHB | HIST2 | 149848225 | 0.6599 | 5.4213  | -2.4967 |
| CHB | HIST2 | 149853225 | 0.8304 | 6.6072  | -2.5372 |
| CHB | HIST2 | 149858225 | 1.5658 | 6.4378  | -2.1906 |
| CHB | HIST2 | 149863225 | 1.7519 | 7.2848  | -2.224  |
| CHB | HIST2 | 149868225 | 0.9816 | 6.946   | -2.5036 |
| CHB | HIST2 | 149873225 | 0.7929 | 5.0825  | -2.3815 |
| CHB | HIST2 | 149878225 | 1.6206 | 6.7766  | -2.2133 |
| CHB | HIST2 | 149883225 | 1.7603 | 7.1154  | -2.1992 |
| CHB | HIST2 | 149888225 | 1.7257 | 5.7601  | -2.0044 |
| CHB | HIST2 | 149893225 | 1.5433 | 7.1154  | -2.2883 |
| CHB | HIST2 | 149898225 | 0.7034 | 7.1154  | -2.6332 |
| CHB | HIST2 | 149903225 | 1.8057 | 7.1154  | -2.1805 |
| CHB | HIST2 | 149908225 | 2.5933 | 7.9625  | -1.9897 |
| CHB | HIST2 | 149913225 | 1.4991 | 6.2684  | -2.1966 |
| CHB | HIST2 | 149918225 | 1.9937 | 6.946   | -2.0788 |
| CHB | HIST2 | 149923225 | 3.1725 | 8.6402  | -1.8794 |
| CHB | HIST2 | 149928225 | 3.4908 | 10.1649 | -1.9729 |
| CHB | HIST2 | 149933225 | 2.1807 | 10.3343 | -2.3734 |
| CHB | HIST2 | 149938225 | 2.0284 | 9.1484  | -2.3214 |
| CHB | HIST2 | 149943225 | 2.9916 | 8.4708  | -1.9181 |
| CHB | HIST2 | 149948225 | 2.1917 | 6.7766  | -1.9681 |
| CHB | HIST2 | 149953225 | 1.9785 | 8.1319  | -2.2366 |
| CHB | HIST2 | 149958225 | 1.5429 | 7.9625  | -2.3789 |
| CHB | HIST2 | 149963225 | 0.9977 | 6.0989  | -2.408  |
| CHB | HIST2 | 149968225 | 1.1218 | 5.5907  | -2.2801 |
| CHB | HIST2 | 149973225 | 1.3725 | 4.7436  | -1.9885 |
| CHB | HIST2 | 149978225 | 1.9992 | 5.2519  | -1.7543 |
| CHB | HIST2 | 149983225 | 2.4022 | 8.4708  | -2.1244 |
| CHB | HIST2 | 149988225 | 2.2322 | 9.9955  | -2.3312 |
| CHB | HIST2 | 149993225 | 3.7422 | 9.3178  | -1.7872 |
| CHB | HIST2 | 149998225 | 7.1146 | 10.8426 | -1.0375 |
| CHB | HIST2 | 150003225 | 5.8317 | 9.8261  | -1.2187 |
| CHB | HIST2 | 150008225 | 2.6309 | 9.8261  | -2.1953 |
| CHB | HIST2 | 150013225 | 1.7255 | 10.3343 | -2.5059 |
| CHB | HIST2 | 150018225 | 1.7489 | 8.3013  | -2.3369 |
| CHB | HIST2 | 150023225 | 1.7805 | 9.8261  | -2.4547 |
| CHB | HIST2 | 150028225 | 1.0042 | 8.3013  | -2.6025 |
| CHB | HIST2 | 150033225 | 1.0459 | 5.5907  | -2.3189 |
| CHB | HIST2 | 150038225 | 2.1462 | 6.6072  | -1.9593 |
| CHB | HIST2 | 150043225 | 1.9676 | 7.1154  | -2.114  |
| CHB | HIST2 | 150048225 | 0.636  | 6.7766  | -2.6359 |
| CHB | HIST2 | 150053225 | 0.9884 | 5.9295  | -2.3921 |
| CHB | HIST2 | 150058225 | 1.1485 | 6.0989  | -2.3368 |
| CHB | HIST2 | 150063225 | 0.7002 | 6.0989  | -2.5484 |
| CHB | HIST2 | 150068225 | 0.6195 | 5.0825  | -2.4778 |
| CHB | HIST2 | 150073225 | 1.2414 | 6.4378  | -2.3365 |
| CHB | HIST2 | 150078225 | 1.2661 | 7.2848  | -2.4193 |

## 2\_TajimasD\_data

|     |       |           |         |         |         |
|-----|-------|-----------|---------|---------|---------|
| CHB | HIST2 | 150083225 | 0.9775  | 5.7601  | -2.3761 |
| CHB | HIST2 | 150088225 | 1.8403  | 6.2684  | -2.0394 |
| CHB | HIST2 | 150093225 | 1.5445  | 6.6072  | -2.2236 |
| CHB | HIST2 | 150098225 | 0.9933  | 6.2684  | -2.4295 |
| CHB | HIST2 | 150103225 | 1.6092  | 7.7931  | -2.3372 |
| CHB | HIST2 | 150108225 | 1.8386  | 8.1319  | -2.2875 |
| CHB | HIST2 | 150113225 | 1.4287  | 6.6072  | -2.2745 |
| CHB | HIST2 | 150118225 | 1.4759  | 6.7766  | -2.2754 |
| CHB | HIST2 | 150123225 | 2.2237  | 7.6237  | -2.0824 |
| CHB | HIST2 | 150128225 | 2.5092  | 7.4543  | -1.9465 |
| CHB | HIST2 | 150133225 | 2.1606  | 8.3013  | -2.1901 |
| CHB | HIST2 | 150138225 | 2.089   | 10.1649 | -2.3873 |
| CHB | HIST2 | 150143225 | 2.6663  | 9.3178  | -2.1321 |
| CHB | HIST2 | 150148225 | 3.0685  | 8.1319  | -1.8404 |
| CHB | HIST2 | 150153225 | 2.0584  | 8.8096  | -2.2794 |
| CHB | HIST2 | 150158225 | 2.3716  | 12.5367 | -2.4679 |
| CHB | HIST2 | 150163225 | 7.6231  | 13.045  | -1.2678 |
| CHB | HIST2 | 150168225 | 10.2798 | 9.8261  | 0.1384  |
| CHB | HIST2 | 150173225 | 6.2543  | 9.4872  | -1.0191 |
| CHB | HIST2 | 150178225 | 5.5844  | 9.8261  | -1.2941 |
| CHB | HIST2 | 150183225 | 7.0824  | 9.3178  | -0.7165 |
| CHB | HIST2 | 150188225 | 4.0306  | 6.7766  | -1.1788 |
| CHB | HIST2 | 150193225 | 4.0195  | 6.4378  | -1.0873 |
| CHB | HIST2 | 150198225 | 8.6675  | 9.6567  | -0.3067 |
| CHB | HIST2 | 150203225 | 9.2966  | 10.6731 | -0.3888 |
| CHB | HIST2 | 150208225 | 8.6404  | 11.012  | -0.6505 |
| CHB | HIST2 | 150213225 | 8.9794  | 12.1979 | -0.8019 |
| CHB | HIST2 | 150218225 | 7.3725  | 9.8261  | -0.7486 |
| CHB | HIST2 | 150223225 | 5.5319  | 7.7931  | -0.8546 |
| CHB | HIST2 | 150228225 | 2.9593  | 6.2684  | -1.5241 |
| CHB | HIST2 | 150233225 | 2.5791  | 4.2354  | -1.0783 |
| CHB | HIST2 | 150238225 | 3.6267  | 5.0825  | -0.8082 |
| CHB | HIST2 | 150243225 | 3.5481  | 6.2684  | -1.2529 |
| CHB | HIST2 | 150248225 | 5.1123  | 6.946   | -0.7697 |
| CHB | HIST2 | 150253225 | 5.5913  | 8.1319  | -0.9234 |
| CHB | HIST2 | 150258225 | 7.1003  | 8.4708  | -0.4798 |
| CHB | HIST2 | 150263225 | 9.6421  | 9.1484  | 0.161   |
| CHB | HIST2 | 150268225 | 12.8372 | 11.5202 | 0.3463  |
| CHB | HIST2 | 150273225 | 11.4002 | 11.1814 | 0.0592  |
| CHB | HIST2 | 150278225 | 9.6291  | 11.012  | -0.3793 |
| CHB | HIST2 | 150283225 | 10.725  | 12.1979 | -0.367  |
| CHB | HIST2 | 150288225 | 9.5454  | 10.6731 | -0.3185 |
| CHB | HIST2 | 150293225 | 7.1532  | 8.979   | -0.6057 |
| CHB | HIST2 | 150298225 | 4.0926  | 7.4543  | -1.3233 |
| CHB | HIST2 | 150303225 | 5.9437  | 8.1319  | -0.7954 |
| CHB | HIST2 | 150308225 | 7.8534  | 10.6731 | -0.7964 |
| YRI | HIST2 | 149318225 | 2.0704  | 2.5209  | -0.4512 |
| YRI | HIST2 | 149323225 | 3.3407  | 4.8738  | -0.88   |
| YRI | HIST2 | 149328225 | 4.0129  | 7.3947  | -1.3363 |

## 2\_TajimasD\_data

|     |       |           |        |         |         |
|-----|-------|-----------|--------|---------|---------|
| YRI | HIST2 | 149333225 | 6.6138 | 8.7392  | -0.7205 |
| YRI | HIST2 | 149338225 | 7.769  | 10.0837 | -0.687  |
| YRI | HIST2 | 149343225 | 6.4838 | 8.235   | -0.627  |
| YRI | HIST2 | 149348225 | 7.0928 | 9.2434  | -0.6921 |
| YRI | HIST2 | 149353225 | 6.5672 | 8.7392  | -0.7362 |
| YRI | HIST2 | 149358225 | 5.7731 | 6.0502  | -0.1313 |
| YRI | HIST2 | 149363225 | 5.3881 | 7.2267  | -0.7419 |
| YRI | HIST2 | 149368225 | 3.5455 | 7.2267  | -1.4854 |
| YRI | HIST2 | 149373225 | 2.9023 | 7.2267  | -1.745  |
| YRI | HIST2 | 149378225 | 3.6038 | 6.7225  | -1.3439 |
| YRI | HIST2 | 149383225 | 5.2329 | 5.5461  | -0.1604 |
| YRI | HIST2 | 149388225 | 6.9174 | 7.0586  | -0.0582 |
| YRI | HIST2 | 149393225 | 5.9553 | 6.8906  | -0.3941 |
| YRI | HIST2 | 149398225 | 5.1599 | 6.7225  | -0.6733 |
| YRI | HIST2 | 149403225 | 7.3933 | 9.9157  | -0.7605 |
| YRI | HIST2 | 149408225 | 6.2346 | 8.7392  | -0.849  |
| YRI | HIST2 | 149413225 | 5.9953 | 7.0586  | -0.4383 |
| YRI | HIST2 | 149418225 | 5.7145 | 5.5461  | 0.0862  |
| YRI | HIST2 | 149423225 | 2.4603 | 3.3612  | -0.7117 |
| YRI | HIST2 | 149428225 | 2.8504 | 4.3696  | -0.9593 |
| YRI | HIST2 | 149433225 | 2.1945 | 2.8571  | -0.5992 |
| YRI | HIST2 | 149438225 | 0.037  | 0.5042  | -1.4683 |
| YRI | HIST2 | 149443225 | 0.0185 | 0.1681  | -0.8893 |
| YRI | HIST2 | 149448225 | 0.1661 | 0.6722  | -1.3249 |
| YRI | HIST2 | 149453225 | 0.6607 | 1.5126  | -1.2685 |
| YRI | HIST2 | 149458225 | 0.5589 | 1.3445  | -1.276  |
| YRI | HIST2 | 149463225 | 0.0643 | 0.5042  | -1.3825 |
| YRI | HIST2 | 149468225 | 0      | 0       | 0       |
| YRI | HIST2 | 149473225 | 0      | 0       | 0       |
| YRI | HIST2 | 149478225 | 0      | 0       | 0       |
| YRI | HIST2 | 149483225 | 0      | 0       | 0       |
| YRI | HIST2 | 149488225 | 0      | 0       | 0       |
| YRI | HIST2 | 149493225 | 0      | 0       | 0       |
| YRI | HIST2 | 149498225 | 0      | 0       | 0       |
| YRI | HIST2 | 149503225 | 0      | 0       | 0       |
| YRI | HIST2 | 149508225 | 0.411  | 0.6722  | -0.6838 |
| YRI | HIST2 | 149513225 | 0.8557 | 2.3529  | -1.5849 |
| YRI | HIST2 | 149518225 | 0.4899 | 1.8487  | -1.738  |
| YRI | HIST2 | 149523225 | 0.0453 | 0.1681  | -0.73   |
| YRI | HIST2 | 149528225 | 0.2339 | 0.5042  | -0.8495 |
| YRI | HIST2 | 149533225 | 0.2339 | 0.5042  | -0.8495 |
| YRI | HIST2 | 149538225 | 0      | 0       | 0       |
| YRI | HIST2 | 149543225 | 0      | 0       | 0       |
| YRI | HIST2 | 149548225 | 0      | 0       | 0       |
| YRI | HIST2 | 149553225 | 0      | 0       | 0       |
| YRI | HIST2 | 149558225 | 0      | 0       | 0       |
| YRI | HIST2 | 149563225 | 0      | 0       | 0       |
| YRI | HIST2 | 149568225 | 0.6355 | 0.6722  | -0.0961 |
| YRI | HIST2 | 149573225 | 1.1098 | 1.6806  | -0.7853 |

## 2\_TajimasD\_data

|     |       |           |         |         |         |
|-----|-------|-----------|---------|---------|---------|
| YRI | HIST2 | 149578225 | 1.0245  | 2.0167  | -1.1863 |
| YRI | HIST2 | 149583225 | 2.3949  | 5.0419  | -1.4748 |
| YRI | HIST2 | 149588225 | 2.2919  | 5.2099  | -1.5795 |
| YRI | HIST2 | 149593225 | 1.2767  | 2.5209  | -1.246  |
| YRI | HIST2 | 149598225 | 3.5693  | 3.5293  | 0.0303  |
| YRI | HIST2 | 149603225 | 6.2413  | 6.3864  | -0.0655 |
| YRI | HIST2 | 149608225 | 4.9205  | 6.7225  | -0.7765 |
| YRI | HIST2 | 149613225 | 1.9094  | 3.1932  | -1.0588 |
| YRI | HIST2 | 149618225 | 0.4905  | 0.6722  | -0.4757 |
| YRI | HIST2 | 149623225 | 0       | 0       | 0       |
| YRI | HIST2 | 149628225 | 0.0093  | 0.1681  | -0.944  |
| YRI | HIST2 | 149633225 | 0.3282  | 0.6722  | -0.9006 |
| YRI | HIST2 | 149638225 | 3.1238  | 2.1848  | 1.0543  |
| YRI | HIST2 | 149643225 | 6.1235  | 5.7141  | 0.2041  |
| YRI | HIST2 | 149648225 | 9.6677  | 10.4199 | -0.2165 |
| YRI | HIST2 | 149653225 | 9.2435  | 10.4199 | -0.3386 |
| YRI | HIST2 | 149658225 | 5.0448  | 6.3864  | -0.6055 |
| YRI | HIST2 | 149663225 | 7.5524  | 7.7309  | -0.0677 |
| YRI | HIST2 | 149668225 | 11.5005 | 14.9575 | -0.7075 |
| YRI | HIST2 | 149673225 | 9.1905  | 13.7811 | -1.0156 |
| YRI | HIST2 | 149678225 | 5.8105  | 8.9073  | -1.0314 |
| YRI | HIST2 | 149683225 | 4.3956  | 9.4115  | -1.5875 |
| YRI | HIST2 | 149688225 | 2.5513  | 8.067   | -2.0127 |
| YRI | HIST2 | 149693225 | 3.0862  | 6.2183  | -1.4479 |
| YRI | HIST2 | 149698225 | 6.3608  | 7.8989  | -0.5722 |
| YRI | HIST2 | 149703225 | 8.2581  | 11.5963 | -0.8693 |
| YRI | HIST2 | 149708225 | 8.6828  | 13.2769 | -1.0529 |
| YRI | HIST2 | 149713225 | 8.9771  | 11.7644 | -0.7161 |
| YRI | HIST2 | 149718225 | 8.3639  | 11.5963 | -0.8417 |
| YRI | HIST2 | 149723225 | 7.1768  | 11.5963 | -1.1509 |
| YRI | HIST2 | 149728225 | 8.4011  | 12.6047 | -1.0119 |
| YRI | HIST2 | 149733225 | 8.0828  | 12.4366 | -1.0614 |
| YRI | HIST2 | 149738225 | 4.6484  | 8.235   | -1.2842 |
| YRI | HIST2 | 149743225 | 4.3186  | 6.2183  | -0.8782 |
| YRI | HIST2 | 149748225 | 6.322   | 7.2267  | -0.3651 |
| YRI | HIST2 | 149753225 | 6.2614  | 7.8989  | -0.6092 |
| YRI | HIST2 | 149758225 | 6.3939  | 10.4199 | -1.159  |
| YRI | HIST2 | 149763225 | 5.4444  | 10.2518 | -1.4051 |
| YRI | HIST2 | 149768225 | 3.1474  | 8.5712  | -1.8718 |
| YRI | HIST2 | 149773225 | 5.4939  | 11.5963 | -1.5891 |
| YRI | HIST2 | 149778225 | 6.9407  | 12.9408 | -1.4089 |
| YRI | HIST2 | 149783225 | 4.8686  | 12.7727 | -1.8791 |
| YRI | HIST2 | 149788225 | 3.9274  | 10.924  | -1.927  |
| YRI | HIST2 | 149793225 | 2.1402  | 4.8738  | -1.5692 |
| YRI | HIST2 | 149798225 | 0.0456  | 0.1681  | -0.7282 |
| YRI | HIST2 | 149803225 | 0       | 0       | 0       |
| YRI | HIST2 | 149808225 | 0       | 0       | 0       |
| YRI | HIST2 | 149813225 | 2.9777  | 5.7141  | -1.3645 |
| YRI | HIST2 | 149818225 | 5.0549  | 8.5712  | -1.2135 |



## 2\_TajimasD\_data

|     |       |           |         |         |         |
|-----|-------|-----------|---------|---------|---------|
| YRI | HIST2 | 149823225 | 2.5589  | 3.0251  | -0.4022 |
| YRI | HIST2 | 149828225 | 0.4817  | 0.1681  | 1.8643  |
| YRI | HIST2 | 149833225 | 0       | 0       | 0       |
| YRI | HIST2 | 149838225 | 0.0183  | 0.1681  | -0.8905 |
| YRI | HIST2 | 149843225 | 2.537   | 4.2016  | -1.0874 |
| YRI | HIST2 | 149848225 | 4.6542  | 10.5879 | -1.6828 |
| YRI | HIST2 | 149853225 | 4.0685  | 12.7727 | -2.0693 |
| YRI | HIST2 | 149858225 | 3.81    | 11.7644 | -2.0435 |
| YRI | HIST2 | 149863225 | 6.3146  | 11.9324 | -1.4241 |
| YRI | HIST2 | 149868225 | 7.8463  | 12.6047 | -1.1455 |
| YRI | HIST2 | 149873225 | 5.2619  | 10.924  | -1.5594 |
| YRI | HIST2 | 149878225 | 7.4703  | 11.5963 | -1.0744 |
| YRI | HIST2 | 149883225 | 8.5321  | 11.4282 | -0.7646 |
| YRI | HIST2 | 149888225 | 5.4249  | 11.9324 | -1.6496 |
| YRI | HIST2 | 149893225 | 5.1862  | 13.1089 | -1.8378 |
| YRI | HIST2 | 149898225 | 4.378   | 12.6047 | -1.9804 |
| YRI | HIST2 | 149903225 | 5.1857  | 12.1005 | -1.7299 |
| YRI | HIST2 | 149908225 | 6.7262  | 11.0921 | -1.1854 |
| YRI | HIST2 | 149913225 | 5.1674  | 11.9324 | -1.7149 |
| YRI | HIST2 | 149918225 | 6.2594  | 13.613  | -1.6459 |
| YRI | HIST2 | 149923225 | 7.2406  | 13.445  | -1.4051 |
| YRI | HIST2 | 149928225 | 8.4768  | 12.7727 | -1.0213 |
| YRI | HIST2 | 149933225 | 9.6141  | 13.445  | -0.8676 |
| YRI | HIST2 | 149938225 | 8.3499  | 12.2685 | -0.9677 |
| YRI | HIST2 | 149943225 | 6.3429  | 9.2434  | -0.9335 |
| YRI | HIST2 | 149948225 | 4.9525  | 8.9073  | -1.3172 |
| YRI | HIST2 | 149953225 | 8.6647  | 12.6047 | -0.9485 |
| YRI | HIST2 | 149958225 | 7.2806  | 10.924  | -1.0035 |
| YRI | HIST2 | 149963225 | 3.7702  | 7.7309  | -1.5028 |
| YRI | HIST2 | 149968225 | 6.4047  | 9.4115  | -0.9516 |
| YRI | HIST2 | 149973225 | 6.9166  | 9.4115  | -0.7896 |
| YRI | HIST2 | 149978225 | 7.1072  | 9.5795  | -0.7697 |
| YRI | HIST2 | 149983225 | 10.3106 | 12.9408 | -0.6176 |
| YRI | HIST2 | 149988225 | 9.2029  | 12.7727 | -0.8487 |
| YRI | HIST2 | 149993225 | 8.8764  | 13.1089 | -0.9818 |
| YRI | HIST2 | 149998225 | 14.1567 | 15.4617 | -0.2588 |
| YRI | HIST2 | 150003225 | 13.1306 | 13.9492 | -0.179  |
| YRI | HIST2 | 150008225 | 12.5625 | 16.134  | -0.68   |
| YRI | HIST2 | 150013225 | 15.4155 | 17.1423 | -0.3103 |
| YRI | HIST2 | 150018225 | 14.3006 | 14.9575 | -0.1344 |
| YRI | HIST2 | 150023225 | 14.1563 | 16.134  | -0.3765 |
| YRI | HIST2 | 150028225 | 11.3176 | 13.1089 | -0.4155 |
| YRI | HIST2 | 150033225 | 7.6112  | 10.5879 | -0.8442 |
| YRI | HIST2 | 150038225 | 8.9277  | 13.445  | -1.023  |
| YRI | HIST2 | 150043225 | 12.7063 | 14.9575 | -0.4607 |
| YRI | HIST2 | 150048225 | 11.1573 | 14.6214 | -0.7245 |
| YRI | HIST2 | 150053225 | 6.8504  | 12.6047 | -1.3852 |
| YRI | HIST2 | 150058225 | 7.4823  | 12.7727 | -1.2577 |
| YRI | HIST2 | 150063225 | 9.4442  | 13.445  | -0.9061 |

## 2\_TajimasD\_data

|     |       |           |         |         |         |
|-----|-------|-----------|---------|---------|---------|
| YRI | HIST2 | 150068225 | 8.429   | 11.7644 | -0.8569 |
| YRI | HIST2 | 150073225 | 9.8846  | 14.1172 | -0.9152 |
| YRI | HIST2 | 150078225 | 11.9997 | 17.1423 | -0.924  |
| YRI | HIST2 | 150083225 | 11.6259 | 16.134  | -0.8583 |
| YRI | HIST2 | 150088225 | 14.1893 | 16.134  | -0.3703 |
| YRI | HIST2 | 150093225 | 14.225  | 15.4617 | -0.2452 |
| YRI | HIST2 | 150098225 | 10.556  | 13.2769 | -0.6236 |
| YRI | HIST2 | 150103225 | 10.6994 | 14.7895 | -0.8461 |
| YRI | HIST2 | 150108225 | 12.1453 | 16.8062 | -0.8534 |
| YRI | HIST2 | 150113225 | 9.628   | 15.2937 | -1.1352 |
| YRI | HIST2 | 150118225 | 7.5142  | 14.6214 | -1.4864 |
| YRI | HIST2 | 150123225 | 7.9899  | 14.7895 | -1.4066 |
| YRI | HIST2 | 150128225 | 10.0548 | 14.7895 | -0.9795 |
| YRI | HIST2 | 150133225 | 11.5888 | 15.7978 | -0.8177 |
| YRI | HIST2 | 150138225 | 12.7201 | 17.3104 | -0.8171 |
| YRI | HIST2 | 150143225 | 11.5205 | 16.134  | -0.8784 |
| YRI | HIST2 | 150148225 | 7.9123  | 11.5963 | -0.9593 |
| YRI | HIST2 | 150153225 | 10.4622 | 13.1089 | -0.6139 |
| YRI | HIST2 | 150158225 | 16.656  | 19.1591 | -0.4042 |
| YRI | HIST2 | 150163225 | 16.7745 | 19.3272 | -0.4087 |
| YRI | HIST2 | 150168225 | 13.8711 | 17.1423 | -0.5877 |
| YRI | HIST2 | 150173225 | 11.5174 | 15.1256 | -0.7306 |
| YRI | HIST2 | 150178225 | 10.8839 | 13.7811 | -0.6409 |
| YRI | HIST2 | 150183225 | 11.7537 | 14.4534 | -0.5708 |
| YRI | HIST2 | 150188225 | 9.2996  | 11.9324 | -0.6674 |
| YRI | HIST2 | 150193225 | 8.5916  | 10.5879 | -0.5661 |
| YRI | HIST2 | 150198225 | 11.1994 | 11.2602 | -0.0163 |
| YRI | HIST2 | 150203225 | 11.9021 | 11.5963 | 0.0796  |
| YRI | HIST2 | 150208225 | 13.1178 | 14.1172 | -0.2161 |
| YRI | HIST2 | 150213225 | 13.4481 | 14.9575 | -0.3089 |
| YRI | HIST2 | 150218225 | 11.256  | 12.7727 | -0.3606 |
| YRI | HIST2 | 150223225 | 8.6042  | 10.0837 | -0.4391 |
| YRI | HIST2 | 150228225 | 4.3385  | 8.4031  | -1.4285 |
| YRI | HIST2 | 150233225 | 3.1394  | 7.0586  | -1.6157 |
| YRI | HIST2 | 150238225 | 4.1905  | 7.2267  | -1.2252 |
| YRI | HIST2 | 150243225 | 4.8219  | 10.2518 | -1.587  |
| YRI | HIST2 | 150248225 | 6.1037  | 10.924  | -1.3276 |
| YRI | HIST2 | 150253225 | 7.1965  | 9.9157  | -0.8198 |
| YRI | HIST2 | 150258225 | 10.1715 | 10.2518 | -0.0235 |
| YRI | HIST2 | 150263225 | 14.0328 | 12.9408 | 0.2564  |
| YRI | HIST2 | 150268225 | 18.5669 | 17.3104 | 0.2237  |
| YRI | HIST2 | 150273225 | 16.7098 | 16.6382 | 0.0132  |
| YRI | HIST2 | 150278225 | 13.7164 | 15.1256 | -0.2854 |
| YRI | HIST2 | 150283225 | 13.1092 | 14.6214 | -0.3163 |
| YRI | HIST2 | 150288225 | 11.1294 | 12.7727 | -0.3907 |
| YRI | HIST2 | 150293225 | 10.3933 | 12.4366 | -0.4982 |
| YRI | HIST2 | 150298225 | 9.0042  | 12.1005 | -0.7746 |
| YRI | HIST2 | 150303225 | 10.8396 | 11.9324 | -0.277  |
| YRI | HIST2 | 150308225 | 12.5138 | 13.9492 | -0.3139 |

## 2\_TajimasD\_data

|     |       |           |        |        |         |
|-----|-------|-----------|--------|--------|---------|
| CEU | HIST2 | 149337657 | 7.1923 | 8.3576 | -0.4142 |
| CEU | HIST2 | 149342657 | 6.5479 | 5.9697 | 0.279   |
| CEU | HIST2 | 149347657 | 6.6485 | 5.6286 | 0.5188  |
| CEU | HIST2 | 149352657 | 5.6024 | 6.1402 | -0.2531 |
| CEU | HIST2 | 149357657 | 5.7143 | 5.9697 | -0.1233 |
| CEU | HIST2 | 149362657 | 5.215  | 5.1169 | 0.0543  |
| CEU | HIST2 | 149367657 | 2.5683 | 3.2407 | -0.5514 |
| CEU | HIST2 | 149372657 | 3.4358 | 4.7757 | -0.788  |
| CEU | HIST2 | 149377657 | 4.537  | 5.458  | -0.4815 |
| CEU | HIST2 | 149382657 | 3.7069 | 4.0935 | -0.26   |
| CEU | HIST2 | 149387657 | 5.2144 | 4.4346 | 0.4893  |
| CEU | HIST2 | 149392657 | 6.3327 | 5.9697 | 0.1752  |
| CEU | HIST2 | 149397657 | 5.2449 | 5.7991 | -0.2745 |
| CEU | HIST2 | 149402657 | 5.9522 | 5.9697 | -0.0084 |
| CEU | HIST2 | 149407657 | 4.525  | 4.6052 | -0.0487 |
| CEU | HIST2 | 149412657 | 4.3368 | 3.4112 | 0.727   |
| CEU | HIST2 | 149417657 | 4.1068 | 3.2407 | 0.7102  |
| CEU | HIST2 | 149422657 | 2.0064 | 1.8762 | 0.1658  |
| CEU | HIST2 | 149427657 | 2.7172 | 2.729  | -0.0112 |
| CEU | HIST2 | 149432657 | 2.2086 | 2.3879 | -0.1888 |
| CEU | HIST2 | 149437657 | 0.5232 | 0.6822 | -0.4152 |
| CEU | HIST2 | 149442657 | 0      | 0      | 0       |
| CEU | HIST2 | 149447657 | 0.08   | 0.5117 | -1.3539 |
| CEU | HIST2 | 149452657 | 0.1394 | 0.8528 | -1.6066 |
| CEU | HIST2 | 149457657 | 0.128  | 0.6822 | -1.4472 |
| CEU | HIST2 | 149462657 | 0.0686 | 0.3411 | -1.0924 |
| CEU | HIST2 | 149467657 | 0      | 0      | 0       |
| CEU | HIST2 | 149472657 | 0      | 0      | 0       |
| CEU | HIST2 | 149477657 | 0      | 0      | 0       |
| CEU | HIST2 | 149482657 | 0      | 0      | 0       |
| CEU | HIST2 | 149487657 | 0      | 0      | 0       |
| CEU | HIST2 | 149492657 | 0      | 0      | 0       |
| CEU | HIST2 | 149497657 | 0      | 0      | 0       |
| CEU | HIST2 | 149502657 | 0      | 0      | 0       |
| CEU | HIST2 | 149507657 | 0.1363 | 0.5117 | -1.1774 |
| CEU | HIST2 | 149512657 | 0.4605 | 1.1939 | -1.3069 |
| CEU | HIST2 | 149517657 | 0.3243 | 0.6822 | -0.9346 |
| CEU | HIST2 | 149522657 | 0      | 0      | 0       |
| CEU | HIST2 | 149527657 | 0.0101 | 0.1706 | -0.9534 |
| CEU | HIST2 | 149532657 | 0.0101 | 0.1706 | -0.9534 |
| CEU | HIST2 | 149537657 | 0      | 0      | 0       |
| CEU | HIST2 | 149542657 | 0      | 0      | 0       |
| CEU | HIST2 | 149547657 | 0      | 0      | 0       |
| CEU | HIST2 | 149552657 | 0      | 0      | 0       |
| CEU | HIST2 | 149557657 | 0      | 0      | 0       |
| CEU | HIST2 | 149562657 | 0      | 0      | 0       |
| CEU | HIST2 | 149567657 | 0.5038 | 0.1706 | 1.9793  |
| CEU | HIST2 | 149572657 | 0.885  | 0.6822 | 0.5296  |
| CEU | HIST2 | 149577657 | 0.4805 | 1.0234 | -1.0788 |

## 2\_TajimasD\_data

|     |       |           |         |        |         |
|-----|-------|-----------|---------|--------|---------|
| CEU | HIST2 | 149582657 | 2.8182  | 3.2407 | -0.3464 |
| CEU | HIST2 | 149587657 | 3.7007  | 3.2407 | 0.3772  |
| CEU | HIST2 | 149592657 | 2.1459  | 2.0467 | 0.118   |
| CEU | HIST2 | 149597657 | 2.4286  | 2.8996 | -0.4236 |
| CEU | HIST2 | 149602657 | 5.8841  | 4.4346 | 0.9095  |
| CEU | HIST2 | 149607657 | 7.5463  | 4.7757 | 1.6295  |
| CEU | HIST2 | 149612657 | 3.7706  | 2.2173 | 1.7353  |
| CEU | HIST2 | 149617657 | 0.8439  | 0.5117 | 1.0419  |
| CEU | HIST2 | 149622657 | 0       | 0      | 0       |
| CEU | HIST2 | 149627657 | 0.0301  | 0.1706 | -0.8346 |
| CEU | HIST2 | 149632657 | 0.0301  | 0.1706 | -0.8346 |
| CEU | HIST2 | 149637657 | 2.3997  | 1.7056 | 0.9507  |
| CEU | HIST2 | 149642657 | 3.7413  | 3.5818 | 0.1202  |
| CEU | HIST2 | 149647657 | 7.4811  | 6.6519 | 0.363   |
| CEU | HIST2 | 149652657 | 7.906   | 6.1402 | 0.8309  |
| CEU | HIST2 | 149657657 | 4.3752  | 3.5818 | 0.598   |
| CEU | HIST2 | 149662657 | 6.0134  | 6.3108 | -0.1365 |
| CEU | HIST2 | 149667657 | 5.4199  | 9.3809 | -1.2654 |
| CEU | HIST2 | 149672657 | 5.4801  | 9.5515 | -1.2791 |
| CEU | HIST2 | 149677657 | 5.2674  | 6.9931 | -0.7221 |
| CEU | HIST2 | 149682657 | 2.4492  | 4.4346 | -1.2457 |
| CEU | HIST2 | 149687657 | 0.9485  | 3.4112 | -1.9342 |
| CEU | HIST2 | 149692657 | 1.3814  | 3.4112 | -1.5942 |
| CEU | HIST2 | 149697657 | 2.8858  | 5.1169 | -1.235  |
| CEU | HIST2 | 149702657 | 5.2948  | 6.9931 | -0.7106 |
| CEU | HIST2 | 149707657 | 8.1801  | 7.3342 | 0.3389  |
| CEU | HIST2 | 149712657 | 9.3602  | 7.8459 | 0.5705  |
| CEU | HIST2 | 149717657 | 10.1014 | 8.0164 | 0.7701  |
| CEU | HIST2 | 149722657 | 8.6799  | 6.6519 | 0.8879  |
| CEU | HIST2 | 149727657 | 6.7996  | 6.6519 | 0.0647  |
| CEU | HIST2 | 149732657 | 5.979   | 5.6286 | 0.1782  |
| CEU | HIST2 | 149737657 | 3.3105  | 3.4112 | -0.0791 |
| CEU | HIST2 | 149742657 | 2.4663  | 3.4112 | -0.7421 |
| CEU | HIST2 | 149747657 | 4.6718  | 4.0935 | 0.3889  |
| CEU | HIST2 | 149752657 | 3.3781  | 3.0701 | 0.2642  |
| CEU | HIST2 | 149757657 | 1.8277  | 3.2407 | -1.1586 |
| CEU | HIST2 | 149762657 | 2.309   | 5.1169 | -1.5542 |
| CEU | HIST2 | 149767657 | 2.5848  | 5.458  | -1.502  |
| CEU | HIST2 | 149772657 | 3.2146  | 5.9697 | -1.3296 |
| CEU | HIST2 | 149777657 | 4.2707  | 6.4814 | -0.9909 |
| CEU | HIST2 | 149782657 | 5.437   | 7.6753 | -0.8603 |
| CEU | HIST2 | 149787657 | 3.9297  | 7.1636 | -1.3238 |
| CEU | HIST2 | 149792657 | 1.4871  | 3.0701 | -1.3579 |
| CEU | HIST2 | 149797657 | 0.1235  | 0.1706 | -0.2798 |
| CEU | HIST2 | 149802657 | 0       | 0      | 0       |
| CEU | HIST2 | 149807657 | 0       | 0      | 0       |
| CEU | HIST2 | 149812657 | 1.5739  | 2.0467 | -0.5626 |
| CEU | HIST2 | 149817657 | 2.7071  | 4.2641 | -1.0107 |
| CEU | HIST2 | 149822657 | 1.6324  | 2.3879 | -0.7956 |

## 2\_TajimasD\_data

|     |       |           |         |        |         |
|-----|-------|-----------|---------|--------|---------|
| CEU | HIST2 | 149827657 | 0.4993  | 0.1706 | 1.9525  |
| CEU | HIST2 | 149832657 | 0       | 0      | 0       |
| CEU | HIST2 | 149837657 | 0       | 0      | 0       |
| CEU | HIST2 | 149842657 | 1.0373  | 1.5351 | -0.7381 |
| CEU | HIST2 | 149847657 | 2.0711  | 4.0935 | -1.3599 |
| CEU | HIST2 | 149852657 | 2.2626  | 5.2874 | -1.6264 |
| CEU | HIST2 | 149857657 | 3.1433  | 6.6519 | -1.5361 |
| CEU | HIST2 | 149862657 | 4.2778  | 8.0164 | -1.3809 |
| CEU | HIST2 | 149867657 | 4.6929  | 8.3576 | -1.3027 |
| CEU | HIST2 | 149872657 | 4.3408  | 6.8225 | -1.0619 |
| CEU | HIST2 | 149877657 | 3.9984  | 6.4814 | -1.1129 |
| CEU | HIST2 | 149882657 | 2.7013  | 5.2874 | -1.3906 |
| CEU | HIST2 | 149887657 | 2.3034  | 3.5818 | -0.9635 |
| CEU | HIST2 | 149892657 | 3.6869  | 4.9463 | -0.7182 |
| CEU | HIST2 | 149897657 | 3.5384  | 5.6286 | -1.0632 |
| CEU | HIST2 | 149902657 | 3.7885  | 5.9697 | -1.0527 |
| CEU | HIST2 | 149907657 | 3.8075  | 5.458  | -0.8628 |
| CEU | HIST2 | 149912657 | 1.6186  | 3.9229 | -1.6072 |
| CEU | HIST2 | 149917657 | 1.7209  | 4.0935 | -1.5954 |
| CEU | HIST2 | 149922657 | 3.7238  | 5.2874 | -0.8408 |
| CEU | HIST2 | 149927657 | 4.1686  | 5.6286 | -0.7426 |
| CEU | HIST2 | 149932657 | 2.617   | 5.458  | -1.4852 |
| CEU | HIST2 | 149937657 | 2.0439  | 4.6052 | -1.5551 |
| CEU | HIST2 | 149942657 | 2.6215  | 3.7524 | -0.8193 |
| CEU | HIST2 | 149947657 | 2.2977  | 4.4346 | -1.3408 |
| CEU | HIST2 | 149952657 | 2.9812  | 5.9697 | -1.4423 |
| CEU | HIST2 | 149957657 | 2.1946  | 4.4346 | -1.4055 |
| CEU | HIST2 | 149962657 | 1.1688  | 2.5584 | -1.3843 |
| CEU | HIST2 | 149967657 | 2.1791  | 3.2407 | -0.8705 |
| CEU | HIST2 | 149972657 | 2.1826  | 3.9229 | -1.2138 |
| CEU | HIST2 | 149977657 | 2.2919  | 4.6052 | -1.4045 |
| CEU | HIST2 | 149982657 | 3.1297  | 4.9463 | -1.036  |
| CEU | HIST2 | 149987657 | 3.8433  | 5.7991 | -0.9687 |
| CEU | HIST2 | 149992657 | 5.8895  | 7.6753 | -0.6864 |
| CEU | HIST2 | 149997657 | 9.3993  | 8.5281 | 0.304   |
| CEU | HIST2 | 150002657 | 8.1973  | 6.8225 | 0.5883  |
| CEU | HIST2 | 150007657 | 7.1431  | 6.8225 | 0.1372  |
| CEU | HIST2 | 150012657 | 11.1517 | 9.5515 | 0.5027  |
| CEU | HIST2 | 150017657 | 10.7794 | 8.8692 | 0.6428  |
| CEU | HIST2 | 150022657 | 8.8606  | 7.5047 | 0.532   |
| CEU | HIST2 | 150027657 | 6.0136  | 6.1402 | -0.0596 |
| CEU | HIST2 | 150032657 | 1.9462  | 4.2641 | -1.5046 |
| CEU | HIST2 | 150037657 | 2.7005  | 5.7991 | -1.5347 |
| CEU | HIST2 | 150042657 | 4.1932  | 6.3108 | -0.9722 |
| CEU | HIST2 | 150047657 | 4.4902  | 5.458  | -0.5059 |
| CEU | HIST2 | 150052657 | 3.1923  | 4.9463 | -1.0003 |
| CEU | HIST2 | 150057657 | 2.4185  | 4.6052 | -1.3276 |
| CEU | HIST2 | 150062657 | 3.0056  | 4.7757 | -1.0411 |
| CEU | HIST2 | 150067657 | 1.987   | 3.2407 | -1.028  |

## 2\_TajimasD\_data

|     |       |           |         |         |         |
|-----|-------|-----------|---------|---------|---------|
| CEU | HIST2 | 150072657 | 5.9037  | 5.7991  | 0.0518  |
| CEU | HIST2 | 150077657 | 7.4368  | 7.6753  | -0.0917 |
| CEU | HIST2 | 150082657 | 3.1187  | 5.7991  | -1.3276 |
| CEU | HIST2 | 150087657 | 3.1278  | 6.9931  | -1.6173 |
| CEU | HIST2 | 150092657 | 4.008   | 6.3108  | -1.0573 |
| CEU | HIST2 | 150097657 | 3.9445  | 4.7757  | -0.4889 |
| CEU | HIST2 | 150102657 | 5.1649  | 6.8225  | -0.7093 |
| CEU | HIST2 | 150107657 | 6.5529  | 6.9931  | -0.1842 |
| CEU | HIST2 | 150112657 | 5.2084  | 5.6286  | -0.2137 |
| CEU | HIST2 | 150117657 | 2.9899  | 4.9463  | -1.1157 |
| CEU | HIST2 | 150122657 | 3.5481  | 6.1402  | -1.2198 |
| CEU | HIST2 | 150127657 | 5.9571  | 8.187   | -0.8078 |
| CEU | HIST2 | 150132657 | 6.0233  | 8.6987  | -0.9166 |
| CEU | HIST2 | 150137657 | 6.0825  | 11.5982 | -1.4452 |
| CEU | HIST2 | 150142657 | 6.8081  | 9.7221  | -0.9005 |
| CEU | HIST2 | 150147657 | 5.0326  | 6.1402  | -0.5212 |
| CEU | HIST2 | 150152657 | 2.9186  | 7.1636  | -1.7377 |
| CEU | HIST2 | 150157657 | 5.2408  | 9.5515  | -1.3542 |
| CEU | HIST2 | 150162657 | 9.0115  | 9.7221  | -0.2196 |
| CEU | HIST2 | 150167657 | 10.4014 | 7.8459  | 0.9627  |
| CEU | HIST2 | 150172657 | 8.5935  | 6.8225  | 0.7578  |
| CEU | HIST2 | 150177657 | 6.1723  | 5.2874  | 0.4758  |
| CEU | HIST2 | 150182657 | 7.6821  | 6.1402  | 0.7256  |
| CEU | HIST2 | 150187657 | 6.2696  | 6.8225  | -0.2366 |
| CEU | HIST2 | 150192657 | 5.329   | 5.9697  | -0.3092 |
| CEU | HIST2 | 150197657 | 8.2754  | 6.4814  | 0.8041  |
| CEU | HIST2 | 150202657 | 9.3094  | 7.5047  | 0.7081  |
| CEU | HIST2 | 150207657 | 9.1214  | 7.8459  | 0.4805  |
| CEU | HIST2 | 150212657 | 9.5529  | 7.1636  | 0.9781  |
| CEU | HIST2 | 150217657 | 8.7254  | 6.6519  | 0.9078  |
| CEU | HIST2 | 150222657 | 6.4754  | 6.1402  | 0.1577  |
| CEU | HIST2 | 150227657 | 3.2977  | 4.2641  | -0.6273 |
| CEU | HIST2 | 150232657 | 2.6716  | 3.4112  | -0.5809 |
| CEU | HIST2 | 150237657 | 3.665   | 3.2407  | 0.3479  |
| CEU | HIST2 | 150242657 | 3.0375  | 4.2641  | -0.7962 |
| CEU | HIST2 | 150247657 | 4.9192  | 5.2874  | -0.198  |
| CEU | HIST2 | 150252657 | 5.5411  | 5.1169  | 0.2348  |
| CEU | HIST2 | 150257657 | 9.2591  | 8.0164  | 0.459   |
| CEU | HIST2 | 150262657 | 14.1268 | 8.6987  | 1.8596  |
| CEU | HIST2 | 150267657 | 18.2255 | 10.0632 | 2.4427  |
| CEU | HIST2 | 150272657 | 17.2191 | 11.9394 | 1.3461  |
| CEU | HIST2 | 150277657 | 13.2507 | 10.7454 | 0.7052  |
| CEU | HIST2 | 150282657 | 14.9365 | 10.5749 | 1.2462  |
| CEU | HIST2 | 150287657 | 13.2278 | 8.5281  | 1.6398  |
| CEU | HIST2 | 150292657 | 10.5173 | 7.5047  | 1.182   |
| CEU | HIST2 | 150297657 | 8.1028  | 7.1636  | 0.3845  |
| CEU | HIST2 | 150302657 | 7.8524  | 7.3342  | 0.2076  |
| CEU | HIST2 | 150307657 | 10.5539 | 9.5515  | 0.3149  |
| CEU | HIST2 | 150312657 | 10.9722 | 9.7221  | 0.3863  |

## 2\_TajimasD\_data

|     |       |           |         |         |         |
|-----|-------|-----------|---------|---------|---------|
| CEU | HIST2 | 150317657 | 13.53   | 10.4043 | 0.9067  |
| CEU | HIST2 | 150322657 | 13.6643 | 10.0632 | 1.0777  |
| CEU | HIST2 | 150327657 | 12.6128 | 9.3809  | 1.0325  |
| CHB | HIST2 | 149337657 | 6.3626  | 7.9625  | -0.5929 |
| CHB | HIST2 | 149342657 | 6.1856  | 7.2848  | -0.4418 |
| CHB | HIST2 | 149347657 | 6.0312  | 7.6237  | -0.6141 |
| CHB | HIST2 | 149352657 | 4.5502  | 6.7766  | -0.9557 |
| CHB | HIST2 | 149357657 | 5.151   | 5.2519  | -0.0544 |
| CHB | HIST2 | 149362657 | 4.5073  | 4.066   | 0.2976  |
| CHB | HIST2 | 149367657 | 2.1862  | 3.7271  | -1.1194 |
| CHB | HIST2 | 149372657 | 2.4304  | 5.2519  | -1.5217 |
| CHB | HIST2 | 149377657 | 3.2859  | 5.0825  | -0.9974 |
| CHB | HIST2 | 149382657 | 3.0484  | 3.7271  | -0.4931 |
| CHB | HIST2 | 149387657 | 4.0811  | 5.5907  | -0.7702 |
| CHB | HIST2 | 149392657 | 4.9347  | 5.7601  | -0.4101 |
| CHB | HIST2 | 149397657 | 4.4259  | 5.4213  | -0.522  |
| CHB | HIST2 | 149402657 | 4.9065  | 6.7766  | -0.8028 |
| CHB | HIST2 | 149407657 | 3.0881  | 4.7436  | -0.9765 |
| CHB | HIST2 | 149412657 | 3.8726  | 4.4048  | -0.3349 |
| CHB | HIST2 | 149417657 | 4.2707  | 4.5742  | -0.1848 |
| CHB | HIST2 | 149422657 | 1.5395  | 3.0495  | -1.2986 |
| CHB | HIST2 | 149427657 | 1.9899  | 3.7271  | -1.262  |
| CHB | HIST2 | 149432657 | 1.886   | 3.0495  | -1.0006 |
| CHB | HIST2 | 149437657 | 0.399   | 0.8471  | -1.0105 |
| CHB | HIST2 | 149442657 | 0       | 0       | 0       |
| CHB | HIST2 | 149447657 | 0.0386  | 0.5082  | -1.4741 |
| CHB | HIST2 | 149452657 | 0.1065  | 1.3553  | -2.0239 |
| CHB | HIST2 | 149457657 | 0.0873  | 1.1859  | -1.961  |
| CHB | HIST2 | 149462657 | 0.0194  | 0.3388  | -1.2812 |
| CHB | HIST2 | 149467657 | 0       | 0       | 0       |
| CHB | HIST2 | 149472657 | 0       | 0       | 0       |
| CHB | HIST2 | 149477657 | 0       | 0       | 0       |
| CHB | HIST2 | 149482657 | 0       | 0       | 0       |
| CHB | HIST2 | 149487657 | 0       | 0       | 0       |
| CHB | HIST2 | 149492657 | 0       | 0       | 0       |
| CHB | HIST2 | 149497657 | 0       | 0       | 0       |
| CHB | HIST2 | 149502657 | 0       | 0       | 0       |
| CHB | HIST2 | 149507657 | 0.6372  | 0.6777  | -0.1059 |
| CHB | HIST2 | 149512657 | 0.8968  | 1.0165  | -0.2382 |
| CHB | HIST2 | 149517657 | 0.2694  | 0.5082  | -0.7496 |
| CHB | HIST2 | 149522657 | 0.0097  | 0.1694  | -0.949  |
| CHB | HIST2 | 149527657 | 0.2578  | 0.1694  | 0.5253  |
| CHB | HIST2 | 149532657 | 0.2578  | 0.1694  | 0.5253  |
| CHB | HIST2 | 149537657 | 0       | 0       | 0       |
| CHB | HIST2 | 149542657 | 0       | 0       | 0       |
| CHB | HIST2 | 149547657 | 0       | 0       | 0       |
| CHB | HIST2 | 149552657 | 0       | 0       | 0       |
| CHB | HIST2 | 149557657 | 0       | 0       | 0       |
| CHB | HIST2 | 149562657 | 0       | 0       | 0       |

## 2\_TajimasD\_data

|     |       |           |        |        |         |
|-----|-------|-----------|--------|--------|---------|
| CHB | HIST2 | 149567657 | 0.4601 | 0.3388 | 0.4866  |
| CHB | HIST2 | 149572657 | 0.9039 | 0.8471 | 0.1281  |
| CHB | HIST2 | 149577657 | 1.095  | 1.0165 | 0.1562  |
| CHB | HIST2 | 149582657 | 3.3082 | 3.3883 | -0.0631 |
| CHB | HIST2 | 149587657 | 3.4287 | 3.5577 | -0.0975 |
| CHB | HIST2 | 149592657 | 2.0525 | 1.6942 | 0.4917  |
| CHB | HIST2 | 149597657 | 2.9082 | 2.2024 | 0.7903  |
| CHB | HIST2 | 149602657 | 6.534  | 4.2354 | 1.4964  |
| CHB | HIST2 | 149607657 | 7.0862 | 5.4213 | 0.873   |
| CHB | HIST2 | 149612657 | 2.7537 | 2.8801 | -0.114  |
| CHB | HIST2 | 149617657 | 0.574  | 0.5082 | 0.2066  |
| CHB | HIST2 | 149622657 | 0      | 0      | 0       |
| CHB | HIST2 | 149627657 | 0.0097 | 0.1694 | -0.949  |
| CHB | HIST2 | 149632657 | 0.0097 | 0.1694 | -0.949  |
| CHB | HIST2 | 149637657 | 2.8808 | 1.5247 | 2.0147  |
| CHB | HIST2 | 149642657 | 4.7697 | 4.2354 | 0.3478  |
| CHB | HIST2 | 149647657 | 7.5328 | 6.7766 | 0.3246  |
| CHB | HIST2 | 149652657 | 6.6267 | 5.4213 | 0.6321  |
| CHB | HIST2 | 149657657 | 3.0921 | 4.5742 | -0.9025 |
| CHB | HIST2 | 149662657 | 5.9966 | 5.4213 | 0.3017  |
| CHB | HIST2 | 149667657 | 8.2781 | 6.946  | 0.5592  |
| CHB | HIST2 | 149672657 | 8.1593 | 8.6402 | -0.1653 |
| CHB | HIST2 | 149677657 | 5.5639 | 6.0989 | -0.2525 |
| CHB | HIST2 | 149682657 | 2.9461 | 4.7436 | -1.0603 |
| CHB | HIST2 | 149687657 | 2.256  | 4.2354 | -1.2886 |
| CHB | HIST2 | 149692657 | 3.1883 | 4.066  | -0.5919 |
| CHB | HIST2 | 149697657 | 4.2125 | 4.5742 | -0.2202 |
| CHB | HIST2 | 149702657 | 6.1365 | 6.946  | -0.3398 |
| CHB | HIST2 | 149707657 | 8.0221 | 7.9625 | 0.0221  |
| CHB | HIST2 | 149712657 | 7.1081 | 6.2684 | 0.3867  |
| CHB | HIST2 | 149717657 | 7.4384 | 8.1319 | -0.2521 |
| CHB | HIST2 | 149722657 | 7.305  | 8.8096 | -0.508  |
| CHB | HIST2 | 149727657 | 6.5926 | 8.6402 | -0.7038 |
| CHB | HIST2 | 149732657 | 5.754  | 7.2848 | -0.6153 |
| CHB | HIST2 | 149737657 | 2.7881 | 4.2354 | -0.9422 |
| CHB | HIST2 | 149742657 | 1.5443 | 3.0495 | -1.2945 |
| CHB | HIST2 | 149747657 | 3.8666 | 2.8801 | 0.8894  |
| CHB | HIST2 | 149752657 | 3.2732 | 2.8801 | 0.3544  |
| CHB | HIST2 | 149757657 | 1.1856 | 5.5907 | -2.2476 |
| CHB | HIST2 | 149762657 | 1.9924 | 6.6072 | -2.0269 |
| CHB | HIST2 | 149767657 | 2.1599 | 4.7436 | -1.5241 |
| CHB | HIST2 | 149772657 | 1.3202 | 5.9295 | -2.2314 |
| CHB | HIST2 | 149777657 | 0.7826 | 4.913  | -2.3626 |
| CHB | HIST2 | 149782657 | 1.0246 | 4.4048 | -2.127  |
| CHB | HIST2 | 149787657 | 0.744  | 5.7601 | -2.4921 |
| CHB | HIST2 | 149792657 | 0.4026 | 3.3883 | -2.3513 |
| CHB | HIST2 | 149797657 | 0.1513 | 0.5082 | -1.1204 |
| CHB | HIST2 | 149802657 | 0      | 0      | 0       |
| CHB | HIST2 | 149807657 | 0      | 0      | 0       |



## 2\_TajimasD\_data

|     |       |           |        |         |         |
|-----|-------|-----------|--------|---------|---------|
| CHB | HIST2 | 149812657 | 0.4879 | 2.2024  | -1.9198 |
| CHB | HIST2 | 149817657 | 1.276  | 5.4213  | -2.1737 |
| CHB | HIST2 | 149822657 | 1.1542 | 3.3883  | -1.7594 |
| CHB | HIST2 | 149827657 | 0.3661 | 0.1694  | 1.1688  |
| CHB | HIST2 | 149832657 | 0      | 0       | 0       |
| CHB | HIST2 | 149837657 | 0      | 0       | 0       |
| CHB | HIST2 | 149842657 | 0.2878 | 1.8636  | -2.0105 |
| CHB | HIST2 | 149847657 | 0.6405 | 4.913   | -2.4439 |
| CHB | HIST2 | 149852657 | 0.8979 | 7.1154  | -2.5533 |
| CHB | HIST2 | 149857657 | 1.5464 | 6.2684  | -2.1748 |
| CHB | HIST2 | 149862657 | 1.4534 | 6.6072  | -2.2636 |
| CHB | HIST2 | 149867657 | 0.9913 | 7.1154  | -2.515  |
| CHB | HIST2 | 149872657 | 1.0914 | 5.7601  | -2.3195 |
| CHB | HIST2 | 149877657 | 1.6012 | 6.6072  | -2.1987 |
| CHB | HIST2 | 149882657 | 1.7603 | 7.1154  | -2.1992 |
| CHB | HIST2 | 149887657 | 1.2762 | 5.7601  | -2.2277 |
| CHB | HIST2 | 149892657 | 1.5239 | 6.7766  | -2.2548 |
| CHB | HIST2 | 149897657 | 1.1626 | 7.2848  | -2.4609 |
| CHB | HIST2 | 149902657 | 1.4296 | 6.946   | -2.3156 |
| CHB | HIST2 | 149907657 | 2.6127 | 8.1319  | -2.0061 |
| CHB | HIST2 | 149912657 | 1.5418 | 6.2684  | -2.1769 |
| CHB | HIST2 | 149917657 | 1.4919 | 6.7766  | -2.2685 |
| CHB | HIST2 | 149922657 | 3.5157 | 8.979   | -1.8123 |
| CHB | HIST2 | 149927657 | 3.9733 | 10.3343 | -1.8516 |
| CHB | HIST2 | 149932657 | 2.1807 | 10.3343 | -2.3734 |
| CHB | HIST2 | 149937657 | 2.0573 | 9.3178  | -2.3273 |
| CHB | HIST2 | 149942657 | 2.9528 | 7.9625  | -1.8564 |
| CHB | HIST2 | 149947657 | 2.0617 | 6.2684  | -1.9375 |
| CHB | HIST2 | 149952657 | 1.9882 | 8.1319  | -2.2331 |
| CHB | HIST2 | 149957657 | 1.6149 | 7.7931  | -2.335  |
| CHB | HIST2 | 149962657 | 0.9977 | 6.0989  | -2.408  |
| CHB | HIST2 | 149967657 | 1.1896 | 6.4378  | -2.3598 |
| CHB | HIST2 | 149972657 | 1.4017 | 5.2519  | -2.0765 |
| CHB | HIST2 | 149977657 | 1.9513 | 4.913   | -1.6941 |
| CHB | HIST2 | 149982657 | 2.2138 | 7.7931  | -2.1087 |
| CHB | HIST2 | 149987657 | 2.2511 | 9.9955  | -2.3255 |
| CHB | HIST2 | 149992657 | 3.9113 | 9.6567  | -1.7815 |
| CHB | HIST2 | 149997657 | 6.7367 | 10.5037 | -1.08   |
| CHB | HIST2 | 150002657 | 5.34   | 9.9955  | -1.398  |
| CHB | HIST2 | 150007657 | 2.8742 | 9.4872  | -2.0846 |
| CHB | HIST2 | 150012657 | 2.2269 | 10.5037 | -2.3729 |
| CHB | HIST2 | 150017657 | 1.5117 | 8.8096  | -2.464  |
| CHB | HIST2 | 150022657 | 1.732  | 8.8096  | -2.3896 |
| CHB | HIST2 | 150027657 | 1.3954 | 8.6402  | -2.4903 |
| CHB | HIST2 | 150032657 | 1.1041 | 6.4378  | -2.3982 |
| CHB | HIST2 | 150037657 | 1.8289 | 6.6072  | -2.0987 |
| CHB | HIST2 | 150042657 | 1.9001 | 6.7766  | -2.0933 |
| CHB | HIST2 | 150047657 | 0.9341 | 6.7766  | -2.508  |
| CHB | HIST2 | 150052657 | 1.0657 | 6.6072  | -2.4339 |

## 2\_TajimasD\_data

|     |       |           |         |         |         |
|-----|-------|-----------|---------|---------|---------|
| CHB | HIST2 | 150057657 | 1.1677  | 6.0989  | -2.3277 |
| CHB | HIST2 | 150062657 | 0.6227  | 5.0825  | -2.476  |
| CHB | HIST2 | 150067657 | 0.5625  | 4.913   | -2.4885 |
| CHB | HIST2 | 150072657 | 1.3189  | 7.4543  | -2.4151 |
| CHB | HIST2 | 150077657 | 1.3231  | 7.4543  | -2.4134 |
| CHB | HIST2 | 150082657 | 0.8818  | 5.2519  | -2.3569 |
| CHB | HIST2 | 150087657 | 1.351   | 6.2684  | -2.2648 |
| CHB | HIST2 | 150092657 | 1.5734  | 6.7766  | -2.2335 |
| CHB | HIST2 | 150097657 | 1.4826  | 6.2684  | -2.2042 |
| CHB | HIST2 | 150102657 | 1.6471  | 7.9625  | -2.3403 |
| CHB | HIST2 | 150107657 | 1.8193  | 7.9625  | -2.2765 |
| CHB | HIST2 | 150112657 | 1.419   | 6.2684  | -2.2335 |
| CHB | HIST2 | 150117657 | 1.3644  | 6.2684  | -2.2586 |
| CHB | HIST2 | 150122657 | 2.2237  | 7.6237  | -2.0824 |
| CHB | HIST2 | 150127657 | 2.6016  | 7.9625  | -1.9866 |
| CHB | HIST2 | 150132657 | 2.1415  | 8.3013  | -2.1969 |
| CHB | HIST2 | 150137657 | 2.0696  | 9.6567  | -2.3526 |
| CHB | HIST2 | 150142657 | 2.6756  | 9.3178  | -2.1291 |
| CHB | HIST2 | 150147657 | 2.7567  | 8.4708  | -2.0003 |
| CHB | HIST2 | 150152657 | 1.9176  | 8.8096  | -2.3269 |
| CHB | HIST2 | 150157657 | 2.7124  | 12.7061 | -2.3957 |
| CHB | HIST2 | 150162657 | 6.6802  | 12.3673 | -1.3986 |
| CHB | HIST2 | 150167657 | 10.2798 | 9.8261  | 0.1384  |
| CHB | HIST2 | 150172657 | 7.3478  | 10.3343 | -0.8693 |
| CHB | HIST2 | 150177657 | 5.1327  | 9.9955  | -1.4602 |
| CHB | HIST2 | 150182657 | 7.0729  | 9.3178  | -0.7196 |
| CHB | HIST2 | 150187657 | 4.4826  | 6.7766  | -0.9847 |
| CHB | HIST2 | 150192657 | 4.0677  | 6.7766  | -1.1628 |
| CHB | HIST2 | 150197657 | 8.1889  | 9.3178  | -0.3619 |
| CHB | HIST2 | 150202657 | 9.2675  | 10.1649 | -0.2653 |
| CHB | HIST2 | 150207657 | 8.6419  | 11.012  | -0.6501 |
| CHB | HIST2 | 150212657 | 8.9313  | 11.8591 | -0.7491 |
| CHB | HIST2 | 150217657 | 7.8589  | 9.9955  | -0.6416 |
| CHB | HIST2 | 150222657 | 5.5802  | 8.3013  | -0.9705 |
| CHB | HIST2 | 150227657 | 2.9787  | 6.4378  | -1.5553 |
| CHB | HIST2 | 150232657 | 2.5696  | 4.4048  | -1.1548 |
| CHB | HIST2 | 150237657 | 3.3891  | 4.5742  | -0.7216 |
| CHB | HIST2 | 150242657 | 3.4205  | 5.7601  | -1.1624 |
| CHB | HIST2 | 150247657 | 5.0069  | 7.2848  | -0.9156 |
| CHB | HIST2 | 150252657 | 4.7007  | 7.7931  | -1.1688 |
| CHB | HIST2 | 150257657 | 7.4337  | 8.4708  | -0.3631 |
| CHB | HIST2 | 150262657 | 10.3708 | 9.9955  | 0.1127  |
| CHB | HIST2 | 150267657 | 12.8469 | 11.6896 | 0.3001  |
| CHB | HIST2 | 150272657 | 11.7183 | 11.1814 | 0.1452  |
| CHB | HIST2 | 150277657 | 8.2082  | 10.3343 | -0.6189 |
| CHB | HIST2 | 150282657 | 10.3698 | 12.0285 | -0.4187 |
| CHB | HIST2 | 150287657 | 10.2166 | 10.8426 | -0.1742 |
| CHB | HIST2 | 150292657 | 7.4507  | 8.6402  | -0.4089 |
| CHB | HIST2 | 150297657 | 4.8423  | 7.9625  | -1.1562 |

## 2\_TajimasD\_data

|     |       |           |        |         |         |
|-----|-------|-----------|--------|---------|---------|
| CHB | HIST2 | 150302657 | 5.5199 | 8.3013  | -0.992  |
| CHB | HIST2 | 150307657 | 7.8342 | 10.6731 | -0.8018 |
| CHB | HIST2 | 150312657 | 7.9126 | 9.6567  | -0.5408 |
| CHB | HIST2 | 150317657 | 9.4946 | 10.1649 | -0.1981 |
| CHB | HIST2 | 150322657 | 8.8245 | 11.3508 | -0.6735 |
| CHB | HIST2 | 150327657 | 8.6257 | 11.5202 | -0.761  |
| YRI | HIST2 | 149337657 | 7.79   | 10.2518 | -0.7195 |
| YRI | HIST2 | 149342657 | 7.0609 | 8.9073  | -0.615  |
| YRI | HIST2 | 149347657 | 7.3971 | 9.0754  | -0.5494 |
| YRI | HIST2 | 149352657 | 6.5304 | 8.4031  | -0.6582 |
| YRI | HIST2 | 149357657 | 5.9701 | 6.5544  | -0.2576 |
| YRI | HIST2 | 149362657 | 4.8751 | 7.0586  | -0.9001 |
| YRI | HIST2 | 149367657 | 3.0712 | 6.3864  | -1.4962 |
| YRI | HIST2 | 149372657 | 3.3885 | 7.3947  | -1.5831 |
| YRI | HIST2 | 149377657 | 4.0781 | 7.5628  | -1.349  |
| YRI | HIST2 | 149382657 | 4.4672 | 5.7141  | -0.6218 |
| YRI | HIST2 | 149387657 | 6.215  | 6.0502  | 0.0781  |
| YRI | HIST2 | 149392657 | 6.7938 | 7.2267  | -0.1747 |
| YRI | HIST2 | 149397657 | 5.7216 | 7.3947  | -0.6611 |
| YRI | HIST2 | 149402657 | 7.2413 | 8.9073  | -0.5549 |
| YRI | HIST2 | 149407657 | 5.7873 | 8.5712  | -0.9607 |
| YRI | HIST2 | 149412657 | 5.3418 | 7.5628  | -0.8598 |
| YRI | HIST2 | 149417657 | 5.4578 | 5.7141  | -0.1278 |
| YRI | HIST2 | 149422657 | 2.9383 | 3.3612  | -0.3341 |
| YRI | HIST2 | 149427657 | 3.1793 | 4.2016  | -0.6678 |
| YRI | HIST2 | 149432657 | 2.5221 | 3.3612  | -0.6629 |
| YRI | HIST2 | 149437657 | 0.5529 | 1.0084  | -0.9081 |
| YRI | HIST2 | 149442657 | 0.0185 | 0.1681  | -0.8893 |
| YRI | HIST2 | 149447657 | 0.1568 | 0.5042  | -1.0918 |
| YRI | HIST2 | 149452657 | 0.4181 | 1.1764  | -1.3563 |
| YRI | HIST2 | 149457657 | 0.5682 | 1.5126  | -1.4063 |
| YRI | HIST2 | 149462657 | 0.3069 | 0.8403  | -1.2048 |
| YRI | HIST2 | 149467657 | 0      | 0       | 0       |
| YRI | HIST2 | 149472657 | 0      | 0       | 0       |
| YRI | HIST2 | 149477657 | 0      | 0       | 0       |
| YRI | HIST2 | 149482657 | 0      | 0       | 0       |
| YRI | HIST2 | 149487657 | 0      | 0       | 0       |
| YRI | HIST2 | 149492657 | 0      | 0       | 0       |
| YRI | HIST2 | 149497657 | 0      | 0       | 0       |
| YRI | HIST2 | 149502657 | 0      | 0       | 0       |
| YRI | HIST2 | 149507657 | 0.4018 | 0.5042  | -0.3218 |
| YRI | HIST2 | 149512657 | 0.6674 | 2.0167  | -1.6133 |
| YRI | HIST2 | 149517657 | 0.4991 | 2.0167  | -1.8145 |
| YRI | HIST2 | 149522657 | 0.2335 | 0.5042  | -0.8507 |
| YRI | HIST2 | 149527657 | 0.2339 | 0.5042  | -0.8495 |
| YRI | HIST2 | 149532657 | 0.2339 | 0.5042  | -0.8495 |
| YRI | HIST2 | 149537657 | 0      | 0       | 0       |
| YRI | HIST2 | 149542657 | 0      | 0       | 0       |
| YRI | HIST2 | 149547657 | 0      | 0       | 0       |

## 2\_TajimasD\_data

|     |       |           |         |         |         |
|-----|-------|-----------|---------|---------|---------|
| YRI | HIST2 | 149552657 | 0       | 0       | 0       |
| YRI | HIST2 | 149557657 | 0       | 0       | 0       |
| YRI | HIST2 | 149562657 | 0       | 0       | 0       |
| YRI | HIST2 | 149567657 | 0.5133  | 0.5042  | 0.0286  |
| YRI | HIST2 | 149572657 | 1.1098  | 1.6806  | -0.7853 |
| YRI | HIST2 | 149577657 | 0.9289  | 1.6806  | -1.0341 |
| YRI | HIST2 | 149582657 | 2.3949  | 5.0419  | -1.4748 |
| YRI | HIST2 | 149587657 | 2.5004  | 5.5461  | -1.5597 |
| YRI | HIST2 | 149592657 | 1.2767  | 2.5209  | -1.246  |
| YRI | HIST2 | 149597657 | 2.5434  | 3.0251  | -0.4155 |
| YRI | HIST2 | 149602657 | 5.5452  | 5.8822  | -0.1638 |
| YRI | HIST2 | 149607657 | 5.9012  | 7.0586  | -0.4771 |
| YRI | HIST2 | 149612657 | 2.6056  | 3.6974  | -0.7958 |
| YRI | HIST2 | 149617657 | 0.545   | 1.0084  | -0.9239 |
| YRI | HIST2 | 149622657 | 0       | 0       | 0       |
| YRI | HIST2 | 149627657 | 0.0093  | 0.1681  | -0.944  |
| YRI | HIST2 | 149632657 | 0.3282  | 0.6722  | -0.9006 |
| YRI | HIST2 | 149637657 | 3.1238  | 2.1848  | 1.0543  |
| YRI | HIST2 | 149642657 | 4.4903  | 4.7057  | -0.1275 |
| YRI | HIST2 | 149647657 | 8.5788  | 9.2434  | -0.2139 |
| YRI | HIST2 | 149652657 | 9.4155  | 10.4199 | -0.2891 |
| YRI | HIST2 | 149657657 | 5.7279  | 7.2267  | -0.6048 |
| YRI | HIST2 | 149662657 | 7.8662  | 8.067   | -0.0733 |
| YRI | HIST2 | 149667657 | 11.1589 | 14.1172 | -0.6397 |
| YRI | HIST2 | 149672657 | 10.1832 | 14.1172 | -0.8506 |
| YRI | HIST2 | 149677657 | 6.4663  | 9.4115  | -0.9321 |
| YRI | HIST2 | 149682657 | 4.4768  | 9.0754  | -1.5053 |
| YRI | HIST2 | 149687657 | 2.5272  | 8.235   | -2.0437 |
| YRI | HIST2 | 149692657 | 3.0043  | 6.5544  | -1.5652 |
| YRI | HIST2 | 149697657 | 4.7508  | 7.2267  | -0.9991 |
| YRI | HIST2 | 149702657 | 8.2867  | 11.4282 | -0.8294 |
| YRI | HIST2 | 149707657 | 10.0844 | 13.2769 | -0.7317 |
| YRI | HIST2 | 149712657 | 7.4268  | 10.924  | -0.9632 |
| YRI | HIST2 | 149717657 | 7.8172  | 12.1005 | -1.0716 |
| YRI | HIST2 | 149722657 | 8.7893  | 12.4366 | -0.8892 |
| YRI | HIST2 | 149727657 | 8.7538  | 12.7727 | -0.9554 |
| YRI | HIST2 | 149732657 | 7.7605  | 12.6047 | -1.1661 |
| YRI | HIST2 | 149737657 | 4.3377  | 7.8989  | -1.3248 |
| YRI | HIST2 | 149742657 | 4.376   | 6.3864  | -0.9074 |
| YRI | HIST2 | 149747657 | 6.9642  | 7.5628  | -0.2317 |
| YRI | HIST2 | 149752657 | 5.9506  | 7.3947  | -0.5706 |
| YRI | HIST2 | 149757657 | 6.3891  | 9.9157  | -1.0633 |
| YRI | HIST2 | 149762657 | 6.0755  | 10.756  | -1.308  |
| YRI | HIST2 | 149767657 | 3.2155  | 9.2434  | -1.9399 |
| YRI | HIST2 | 149772657 | 5.4029  | 10.924  | -1.5206 |
| YRI | HIST2 | 149777657 | 6.5304  | 11.9324 | -1.3694 |
| YRI | HIST2 | 149782657 | 4.9324  | 13.2769 | -1.9124 |
| YRI | HIST2 | 149787657 | 4.2133  | 11.5963 | -1.9226 |
| YRI | HIST2 | 149792657 | 2.1767  | 5.2099  | -1.6418 |

## 2\_TajimasD\_data

|     |       |           |         |         |         |
|-----|-------|-----------|---------|---------|---------|
| YRI | HIST2 | 149797657 | 0.2934  | 0.8403  | -1.2353 |
| YRI | HIST2 | 149802657 | 0       | 0       | 0       |
| YRI | HIST2 | 149807657 | 0       | 0       | 0       |
| YRI | HIST2 | 149812657 | 2.8529  | 5.2099  | -1.2758 |
| YRI | HIST2 | 149817657 | 5.0549  | 8.5712  | -1.2135 |
| YRI | HIST2 | 149822657 | 2.6837  | 3.5293  | -0.6411 |
| YRI | HIST2 | 149827657 | 0.4817  | 0.1681  | 1.8643  |
| YRI | HIST2 | 149832657 | 0       | 0       | 0       |
| YRI | HIST2 | 149837657 | 0.0183  | 0.1681  | -0.8905 |
| YRI | HIST2 | 149842657 | 1.4735  | 3.1932  | -1.4183 |
| YRI | HIST2 | 149847657 | 4.215   | 9.5795  | -1.6701 |
| YRI | HIST2 | 149852657 | 5.1135  | 13.445  | -1.8868 |
| YRI | HIST2 | 149857657 | 4.0582  | 11.7644 | -1.9798 |
| YRI | HIST2 | 149862657 | 5.5321  | 11.5963 | -1.5792 |
| YRI | HIST2 | 149867657 | 7.5965  | 12.6047 | -1.2056 |
| YRI | HIST2 | 149872657 | 5.9272  | 10.924  | -1.3762 |
| YRI | HIST2 | 149877657 | 7.0118  | 11.2602 | -1.1373 |
| YRI | HIST2 | 149882657 | 8.3506  | 11.5963 | -0.8452 |
| YRI | HIST2 | 149887657 | 5.7786  | 11.9324 | -1.56   |
| YRI | HIST2 | 149892657 | 5.3854  | 13.1089 | -1.7916 |
| YRI | HIST2 | 149897657 | 4.7192  | 13.1089 | -1.9461 |
| YRI | HIST2 | 149902657 | 3.7105  | 11.2602 | -2.0211 |
| YRI | HIST2 | 149907657 | 6.6539  | 11.5963 | -1.287  |
| YRI | HIST2 | 149912657 | 6.3756  | 12.1005 | -1.4323 |
| YRI | HIST2 | 149917657 | 5.7244  | 12.4366 | -1.6364 |
| YRI | HIST2 | 149922657 | 7.5794  | 14.1172 | -1.4137 |
| YRI | HIST2 | 149927657 | 8.7634  | 13.9492 | -1.1341 |
| YRI | HIST2 | 149932657 | 9.4913  | 13.613  | -0.9225 |
| YRI | HIST2 | 149937657 | 8.733   | 12.1005 | -0.8425 |
| YRI | HIST2 | 149942657 | 5.9611  | 8.9073  | -0.9813 |
| YRI | HIST2 | 149947657 | 4.4918  | 8.4031  | -1.3747 |
| YRI | HIST2 | 149952657 | 8.3324  | 11.7644 | -0.8817 |
| YRI | HIST2 | 149957657 | 7.4743  | 11.0921 | -0.9823 |
| YRI | HIST2 | 149962657 | 4.3268  | 8.9073  | -1.5256 |
| YRI | HIST2 | 149967657 | 6.6061  | 9.9157  | -0.9978 |
| YRI | HIST2 | 149972657 | 6.8664  | 9.2434  | -0.765  |
| YRI | HIST2 | 149977657 | 7.2876  | 9.7476  | -0.7536 |
| YRI | HIST2 | 149982657 | 9.3457  | 12.2685 | -0.7218 |
| YRI | HIST2 | 149987657 | 9.1385  | 11.9324 | -0.7082 |
| YRI | HIST2 | 149992657 | 9.0346  | 13.445  | -0.9988 |
| YRI | HIST2 | 149997657 | 13.5133 | 15.4617 | -0.3864 |
| YRI | HIST2 | 150002657 | 13.5325 | 13.613  | -0.018  |
| YRI | HIST2 | 150007657 | 11.3554 | 15.4617 | -0.8142 |
| YRI | HIST2 | 150012657 | 15.8248 | 17.9827 | -0.3703 |
| YRI | HIST2 | 150017657 | 15.5594 | 15.4617 | 0.0194  |
| YRI | HIST2 | 150022657 | 13.2064 | 15.1256 | -0.3886 |
| YRI | HIST2 | 150027657 | 11.992  | 14.1172 | -0.4595 |
| YRI | HIST2 | 150032657 | 8.8688  | 11.2602 | -0.6402 |
| YRI | HIST2 | 150037657 | 8.3122  | 12.9408 | -1.0869 |

## 2\_TajimasD\_data

|     |       |           |         |         |         |
|-----|-------|-----------|---------|---------|---------|
| YRI | HIST2 | 150042657 | 11.6243 | 14.6214 | -0.6268 |
| YRI | HIST2 | 150047657 | 11.6029 | 14.7895 | -0.6592 |
| YRI | HIST2 | 150052657 | 7.9785  | 13.2769 | -1.2143 |
| YRI | HIST2 | 150057657 | 7.4345  | 12.6047 | -1.2446 |
| YRI | HIST2 | 150062657 | 8.7149  | 13.1089 | -1.0193 |
| YRI | HIST2 | 150067657 | 8.5175  | 12.2685 | -0.9263 |
| YRI | HIST2 | 150072657 | 10.2018 | 14.2853 | -0.8731 |
| YRI | HIST2 | 150077657 | 12.0651 | 16.8062 | -0.8681 |
| YRI | HIST2 | 150082657 | 10.2687 | 15.1256 | -0.9835 |
| YRI | HIST2 | 150087657 | 13.0869 | 15.4617 | -0.4709 |
| YRI | HIST2 | 150092657 | 14.5688 | 15.6298 | -0.2082 |
| YRI | HIST2 | 150097657 | 11.3238 | 13.9492 | -0.5742 |
| YRI | HIST2 | 150102657 | 11.5305 | 15.2937 | -0.754  |
| YRI | HIST2 | 150107657 | 11.9195 | 16.8062 | -0.8948 |
| YRI | HIST2 | 150112657 | 9.0986  | 14.6214 | -1.155  |
| YRI | HIST2 | 150117657 | 7.3768  | 13.7811 | -1.4168 |
| YRI | HIST2 | 150122657 | 8.5138  | 15.2937 | -1.3585 |
| YRI | HIST2 | 150127657 | 9.9576  | 15.1256 | -1.0465 |
| YRI | HIST2 | 150132657 | 11.0102 | 15.6298 | -0.9066 |
| YRI | HIST2 | 150137657 | 12.9618 | 17.6465 | -0.8186 |
| YRI | HIST2 | 150142657 | 11.6407 | 15.9659 | -0.8318 |
| YRI | HIST2 | 150147657 | 7.9015  | 11.7644 | -0.9924 |
| YRI | HIST2 | 150152657 | 10.1871 | 13.445  | -0.7378 |
| YRI | HIST2 | 150157657 | 17.2033 | 19.3272 | -0.3401 |
| YRI | HIST2 | 150162657 | 16.2272 | 18.823  | -0.4263 |
| YRI | HIST2 | 150167657 | 13.4431 | 16.134  | -0.5123 |
| YRI | HIST2 | 150172657 | 12.8102 | 15.9659 | -0.6069 |
| YRI | HIST2 | 150177657 | 11.0689 | 14.6214 | -0.7429 |
| YRI | HIST2 | 150182657 | 11.6681 | 14.1172 | -0.5296 |
| YRI | HIST2 | 150187657 | 9.2865  | 12.1005 | -0.704  |
| YRI | HIST2 | 150192657 | 8.856   | 11.0921 | -0.6071 |
| YRI | HIST2 | 150197657 | 10.6518 | 11.0921 | -0.1195 |
| YRI | HIST2 | 150202657 | 11.4618 | 11.2602 | 0.054   |
| YRI | HIST2 | 150207657 | 12.9984 | 13.7811 | -0.1732 |
| YRI | HIST2 | 150212657 | 13.5415 | 14.9575 | -0.2898 |
| YRI | HIST2 | 150217657 | 12.1199 | 13.2769 | -0.2652 |
| YRI | HIST2 | 150222657 | 8.8104  | 10.2518 | -0.4213 |
| YRI | HIST2 | 150227657 | 4.4688  | 8.4031  | -1.3827 |
| YRI | HIST2 | 150232657 | 3.5175  | 7.7309  | -1.5987 |
| YRI | HIST2 | 150237657 | 3.6382  | 6.7225  | -1.329  |
| YRI | HIST2 | 150242657 | 4.4049  | 9.2434  | -1.5572 |
| YRI | HIST2 | 150247657 | 6.5472  | 11.0921 | -1.234  |
| YRI | HIST2 | 150252657 | 6.678   | 10.2518 | -1.0445 |
| YRI | HIST2 | 150257657 | 10.2802 | 10.5879 | -0.0873 |
| YRI | HIST2 | 150262657 | 14.7909 | 13.1089 | 0.3902  |
| YRI | HIST2 | 150267657 | 18.5391 | 16.9743 | 0.2838  |
| YRI | HIST2 | 150272657 | 16.8153 | 16.9743 | -0.0288 |
| YRI | HIST2 | 150277657 | 13.3488 | 14.9575 | -0.3292 |
| YRI | HIST2 | 150282657 | 12.6911 | 14.4534 | -0.3726 |

## 2\_TajimasD\_data

|     |       |           |         |         |         |
|-----|-------|-----------|---------|---------|---------|
| YRI | HIST2 | 150287657 | 10.99   | 13.1089 | -0.4915 |
| YRI | HIST2 | 150292657 | 10.3046 | 11.9324 | -0.4126 |
| YRI | HIST2 | 150297657 | 9.3925  | 12.1005 | -0.6775 |
| YRI | HIST2 | 150302657 | 10.5637 | 11.9324 | -0.347  |
| YRI | HIST2 | 150307657 | 12.6786 | 14.4534 | -0.3753 |
| YRI | HIST2 | 150312657 | 12.748  | 13.7811 | -0.2286 |
| YRI | HIST2 | 150317657 | 15.2769 | 13.9492 | 0.2904  |
| YRI | HIST2 | 150322657 | 13.47   | 15.1256 | -0.3352 |
| YRI | HIST2 | 150327657 | 11.6829 | 14.1172 | -0.5264 |
| CEU | HIST2 | 149345687 | 4.6832  | 5.1169  | -0.2401 |
| CEU | HIST2 | 149350687 | 6.5281  | 5.9697  | 0.2695  |
| CEU | HIST2 | 149355687 | 7.3962  | 6.3108  | 0.4983  |
| CEU | HIST2 | 149360687 | 5.355   | 6.1402  | -0.3695 |
| CEU | HIST2 | 149365687 | 3.6021  | 4.6052  | -0.609  |
| CEU | HIST2 | 149370687 | 3.1136  | 3.2407  | -0.1042 |
| CEU | HIST2 | 149375687 | 4.8237  | 5.7991  | -0.4831 |
| CEU | HIST2 | 149380687 | 4.1051  | 5.1169  | -0.56   |
| CEU | HIST2 | 149385687 | 4.4073  | 3.9229  | 0.3379  |
| CEU | HIST2 | 149390687 | 7.1274  | 5.9697  | 0.5587  |
| CEU | HIST2 | 149395687 | 4.1111  | 4.9463  | -0.4763 |
| CEU | HIST2 | 149400687 | 5.7411  | 6.3108  | -0.2616 |
| CEU | HIST2 | 149405687 | 6.1134  | 5.6286  | 0.2466  |
| CEU | HIST2 | 149410687 | 3.8971  | 3.2407  | 0.5382  |
| CEU | HIST2 | 149415687 | 4.2911  | 3.4112  | 0.6911  |
| CEU | HIST2 | 149420687 | 2.5547  | 2.0467  | 0.6045  |
| CEU | HIST2 | 149425687 | 2.7926  | 2.729   | 0.0601  |
| CEU | HIST2 | 149430687 | 2.3717  | 2.8996  | -0.4748 |
| CEU | HIST2 | 149435687 | 0.8755  | 1.0234  | -0.2939 |
| CEU | HIST2 | 149440687 | 0       | 0       | 0       |
| CEU | HIST2 | 149445687 | 0.08    | 0.5117  | -1.3539 |
| CEU | HIST2 | 149450687 | 0.1394  | 0.8528  | -1.6066 |
| CEU | HIST2 | 149455687 | 0.128   | 0.6822  | -1.4472 |
| CEU | HIST2 | 149460687 | 0.0686  | 0.3411  | -1.0924 |
| CEU | HIST2 | 149465687 | 0       | 0       | 0       |
| CEU | HIST2 | 149470687 | 0       | 0       | 0       |
| CEU | HIST2 | 149475687 | 0       | 0       | 0       |
| CEU | HIST2 | 149480687 | 0       | 0       | 0       |
| CEU | HIST2 | 149485687 | 0       | 0       | 0       |
| CEU | HIST2 | 149490687 | 0       | 0       | 0       |
| CEU | HIST2 | 149495687 | 0       | 0       | 0       |
| CEU | HIST2 | 149500687 | 0       | 0       | 0       |
| CEU | HIST2 | 149505687 | 0.1161  | 0.3411  | -0.902  |
| CEU | HIST2 | 149510687 | 0.4605  | 1.1939  | -1.3069 |
| CEU | HIST2 | 149515687 | 0.3445  | 0.8528  | -1.1447 |
| CEU | HIST2 | 149520687 | 0       | 0       | 0       |
| CEU | HIST2 | 149525687 | 0       | 0       | 0       |
| CEU | HIST2 | 149530687 | 0.0101  | 0.1706  | -0.9534 |
| CEU | HIST2 | 149535687 | 0.0101  | 0.1706  | -0.9534 |
| CEU | HIST2 | 149540687 | 0       | 0       | 0       |

## 2\_TajimasD\_data

|     |       |           |         |        |         |
|-----|-------|-----------|---------|--------|---------|
| CEU | HIST2 | 149545687 | 0       | 0      | 0       |
| CEU | HIST2 | 149550687 | 0       | 0      | 0       |
| CEU | HIST2 | 149555687 | 0       | 0      | 0       |
| CEU | HIST2 | 149560687 | 0       | 0      | 0       |
| CEU | HIST2 | 149565687 | 0       | 0      | 0       |
| CEU | HIST2 | 149570687 | 0.6005  | 0.3411 | 1.0399  |
| CEU | HIST2 | 149575687 | 0.885   | 0.6822 | 0.5296  |
| CEU | HIST2 | 149580687 | 2.026   | 2.729  | -0.6645 |
| CEU | HIST2 | 149585687 | 3.8     | 3.7524 | 0.0345  |
| CEU | HIST2 | 149590687 | 2.8122  | 2.2173 | 0.6646  |
| CEU | HIST2 | 149595687 | 1.5782  | 2.5584 | -0.9764 |
| CEU | HIST2 | 149600687 | 3.3799  | 3.2407 | 0.1141  |
| CEU | HIST2 | 149605687 | 6.5329  | 4.0935 | 1.6403  |
| CEU | HIST2 | 149610687 | 6.6852  | 4.0935 | 1.7427  |
| CEU | HIST2 | 149615687 | 2.7077  | 1.5351 | 1.7387  |
| CEU | HIST2 | 149620687 | 0       | 0      | 0       |
| CEU | HIST2 | 149625687 | 0       | 0      | 0       |
| CEU | HIST2 | 149630687 | 0.0301  | 0.1706 | -0.8346 |
| CEU | HIST2 | 149635687 | 0.0503  | 0.5117 | -1.4471 |
| CEU | HIST2 | 149640687 | 2.8157  | 2.0467 | 0.915   |
| CEU | HIST2 | 149645687 | 6.906   | 5.9697 | 0.4519  |
| CEU | HIST2 | 149650687 | 8.1224  | 6.9931 | 0.4725  |
| CEU | HIST2 | 149655687 | 6.993   | 4.7757 | 1.3041  |
| CEU | HIST2 | 149660687 | 6.1709  | 6.1402 | 0.0144  |
| CEU | HIST2 | 149665687 | 5.0033  | 8.6987 | -1.266  |
| CEU | HIST2 | 149670687 | 5.1422  | 8.5281 | -1.1814 |
| CEU | HIST2 | 149675687 | 5.5077  | 7.3342 | -0.7318 |
| CEU | HIST2 | 149680687 | 2.8672  | 5.6286 | -1.4046 |
| CEU | HIST2 | 149685687 | 1.3911  | 3.7524 | -1.7107 |
| CEU | HIST2 | 149690687 | 0.8437  | 3.2407 | -1.9655 |
| CEU | HIST2 | 149695687 | 2.7873  | 4.9463 | -1.2313 |
| CEU | HIST2 | 149700687 | 4.9128  | 6.3108 | -0.6418 |
| CEU | HIST2 | 149705687 | 6.2715  | 6.8225 | -0.2358 |
| CEU | HIST2 | 149710687 | 7.2794  | 7.1636 | 0.0474  |
| CEU | HIST2 | 149715687 | 9.5118  | 8.0164 | 0.5523  |
| CEU | HIST2 | 149720687 | 11.0752 | 7.8459 | 1.2165  |
| CEU | HIST2 | 149725687 | 7.7065  | 6.3108 | 0.6408  |
| CEU | HIST2 | 149730687 | 5.8685  | 5.7991 | 0.0344  |
| CEU | HIST2 | 149735687 | 4.9041  | 4.7757 | 0.0755  |
| CEU | HIST2 | 149740687 | 2.8264  | 3.2407 | -0.3397 |
| CEU | HIST2 | 149745687 | 4.7582  | 3.9229 | 0.5826  |
| CEU | HIST2 | 149750687 | 4.0045  | 3.7524 | 0.1826  |
| CEU | HIST2 | 149755687 | 0.7846  | 2.2173 | -1.6006 |
| CEU | HIST2 | 149760687 | 2.4591  | 5.1169 | -1.4711 |
| CEU | HIST2 | 149765687 | 2.2538  | 5.458  | -1.6751 |
| CEU | HIST2 | 149770687 | 3.0021  | 5.1169 | -1.1706 |
| CEU | HIST2 | 149775687 | 4.8458  | 7.1636 | -0.9488 |
| CEU | HIST2 | 149780687 | 5.0361  | 7.8459 | -1.0585 |
| CEU | HIST2 | 149785687 | 4.4255  | 7.3342 | -1.1654 |



## 2\_TajimasD\_data

|     |       |           |         |         |         |
|-----|-------|-----------|---------|---------|---------|
| CEU | HIST2 | 149790687 | 2.1509  | 4.0935  | -1.3063 |
| CEU | HIST2 | 149795687 | 0.5071  | 1.0234  | -1.0259 |
| CEU | HIST2 | 149800687 | 0       | 0       | 0       |
| CEU | HIST2 | 149805687 | 0       | 0       | 0       |
| CEU | HIST2 | 149810687 | 0.8023  | 1.0234  | -0.4393 |
| CEU | HIST2 | 149815687 | 2.4158  | 3.4112  | -0.7818 |
| CEU | HIST2 | 149820687 | 2.404   | 3.4112  | -0.7911 |
| CEU | HIST2 | 149825687 | 0.7906  | 1.0234  | -0.4626 |
| CEU | HIST2 | 149830687 | 0       | 0       | 0       |
| CEU | HIST2 | 149835687 | 0       | 0       | 0       |
| CEU | HIST2 | 149840687 | 0.3923  | 0.5117  | -0.3745 |
| CEU | HIST2 | 149845687 | 1.78    | 3.2407  | -1.1977 |
| CEU | HIST2 | 149850687 | 2.4545  | 5.458   | -1.5702 |
| CEU | HIST2 | 149855687 | 1.8877  | 5.458   | -1.8665 |
| CEU | HIST2 | 149860687 | 3.3262  | 6.3108  | -1.3703 |
| CEU | HIST2 | 149865687 | 5.3475  | 8.8692  | -1.1851 |
| CEU | HIST2 | 149870687 | 5.1039  | 8.5281  | -1.1947 |
| CEU | HIST2 | 149875687 | 3.7314  | 6.4814  | -1.2326 |
| CEU | HIST2 | 149880687 | 3.0142  | 5.458   | -1.2776 |
| CEU | HIST2 | 149885687 | 2.5149  | 3.7524  | -0.8965 |
| CEU | HIST2 | 149890687 | 3.1824  | 4.2641  | -0.7022 |
| CEU | HIST2 | 149895687 | 4.2787  | 6.3108  | -0.933  |
| CEU | HIST2 | 149900687 | 3.2051  | 5.7991  | -1.2848 |
| CEU | HIST2 | 149905687 | 3.2783  | 4.9463  | -0.9513 |
| CEU | HIST2 | 149910687 | 2.9746  | 4.7757  | -1.0593 |
| CEU | HIST2 | 149915687 | 1.8485  | 4.4346  | -1.6226 |
| CEU | HIST2 | 149920687 | 3.0089  | 4.9463  | -1.1049 |
| CEU | HIST2 | 149925687 | 4.3426  | 5.2874  | -0.508  |
| CEU | HIST2 | 149930687 | 3.2931  | 5.7991  | -1.2412 |
| CEU | HIST2 | 149935687 | 1.8936  | 4.9463  | -1.741  |
| CEU | HIST2 | 149940687 | 2.3709  | 3.9229  | -1.0825 |
| CEU | HIST2 | 149945687 | 2.3931  | 4.2641  | -1.2145 |
| CEU | HIST2 | 149950687 | 2.7341  | 5.6286  | -1.4723 |
| CEU | HIST2 | 149955687 | 2.4113  | 4.7757  | -1.3906 |
| CEU | HIST2 | 149960687 | 1.2548  | 2.729   | -1.3934 |
| CEU | HIST2 | 149965687 | 1.5325  | 3.0701  | -1.3189 |
| CEU | HIST2 | 149970687 | 2.5166  | 4.2641  | -1.1344 |
| CEU | HIST2 | 149975687 | 2.4527  | 4.2641  | -1.1759 |
| CEU | HIST2 | 149980687 | 2.2981  | 4.2641  | -1.2762 |
| CEU | HIST2 | 149985687 | 3.2799  | 5.458   | -1.1387 |
| CEU | HIST2 | 149990687 | 5.4222  | 6.4814  | -0.4747 |
| CEU | HIST2 | 149995687 | 7.8707  | 8.0164  | -0.0538 |
| CEU | HIST2 | 150000687 | 9.3315  | 8.187   | 0.4146  |
| CEU | HIST2 | 150005687 | 8.1569  | 6.6519  | 0.6589  |
| CEU | HIST2 | 150010687 | 10.0975 | 9.0398  | 0.3497  |
| CEU | HIST2 | 150015687 | 11.7246 | 10.4043 | 0.383   |
| CEU | HIST2 | 150020687 | 8.189   | 7.1636  | 0.4197  |
| CEU | HIST2 | 150025687 | 5.9483  | 5.9697  | -0.0103 |
| CEU | HIST2 | 150030687 | 3.5411  | 5.458   | -1.0021 |

## 2\_TajimasD\_data

|     |       |           |         |         |         |
|-----|-------|-----------|---------|---------|---------|
| CEU | HIST2 | 150035687 | 2.6452  | 4.9463  | -1.3123 |
| CEU | HIST2 | 150040687 | 3.5801  | 5.6286  | -1.042  |
| CEU | HIST2 | 150045687 | 5.0503  | 6.8225  | -0.7583 |
| CEU | HIST2 | 150050687 | 3.9221  | 5.2874  | -0.7341 |
| CEU | HIST2 | 150055687 | 2.5551  | 4.2641  | -1.1094 |
| CEU | HIST2 | 150060687 | 3.0258  | 5.1169  | -1.1575 |
| CEU | HIST2 | 150065687 | 1.9971  | 3.7524  | -1.2717 |
| CEU | HIST2 | 150070687 | 4.2647  | 4.6052  | -0.2067 |
| CEU | HIST2 | 150075687 | 6.9497  | 6.6519  | 0.1304  |
| CEU | HIST2 | 150080687 | 4.2303  | 5.6286  | -0.7113 |
| CEU | HIST2 | 150085687 | 3.2529  | 6.9931  | -1.565  |
| CEU | HIST2 | 150090687 | 4.2043  | 7.1636  | -1.2114 |
| CEU | HIST2 | 150095687 | 3.9647  | 5.1169  | -0.6378 |
| CEU | HIST2 | 150100687 | 4.0254  | 5.7991  | -0.8785 |
| CEU | HIST2 | 150105687 | 5.6617  | 6.8225  | -0.4967 |
| CEU | HIST2 | 150110687 | 6.3793  | 6.4814  | -0.0458 |
| CEU | HIST2 | 150115687 | 4.2647  | 5.1169  | -0.4717 |
| CEU | HIST2 | 150120687 | 3.5875  | 5.9697  | -1.1497 |
| CEU | HIST2 | 150125687 | 3.9645  | 6.9931  | -1.2672 |
| CEU | HIST2 | 150130687 | 6.5492  | 9.2104  | -0.8647 |
| CEU | HIST2 | 150135687 | 7.5696  | 11.0866 | -0.9614 |
| CEU | HIST2 | 150140687 | 5.6677  | 9.3809  | -1.1862 |
| CEU | HIST2 | 150145687 | 5.093   | 7.5047  | -0.9462 |
| CEU | HIST2 | 150150687 | 4.0992  | 7.3342  | -1.2962 |
| CEU | HIST2 | 150155687 | 5.4238  | 9.2104  | -1.2304 |
| CEU | HIST2 | 150160687 | 6.4822  | 9.2104  | -0.8865 |
| CEU | HIST2 | 150165687 | 9.0563  | 7.8459  | 0.456   |
| CEU | HIST2 | 150170687 | 9.5343  | 6.8225  | 1.1604  |
| CEU | HIST2 | 150175687 | 6.3542  | 5.9697  | 0.1856  |
| CEU | HIST2 | 150180687 | 8.0293  | 6.3108  | 0.789   |
| CEU | HIST2 | 150185687 | 7.8027  | 6.6519  | 0.5038  |
| CEU | HIST2 | 150190687 | 5.6038  | 6.3108  | -0.3246 |
| CEU | HIST2 | 150195687 | 6.0748  | 5.9697  | 0.0507  |
| CEU | HIST2 | 150200687 | 8.4333  | 6.8225  | 0.6893  |
| CEU | HIST2 | 150205687 | 9.4444  | 7.6753  | 0.68    |
| CEU | HIST2 | 150210687 | 9.356   | 7.6753  | 0.646   |
| CEU | HIST2 | 150215687 | 8.6153  | 6.8225  | 0.7671  |
| CEU | HIST2 | 150220687 | 7.7638  | 6.3108  | 0.6671  |
| CEU | HIST2 | 150225687 | 4.9643  | 5.2874  | -0.1737 |
| CEU | HIST2 | 150230687 | 2.3593  | 3.7524  | -1.0093 |
| CEU | HIST2 | 150235687 | 2.919   | 2.729   | 0.1796  |
| CEU | HIST2 | 150240687 | 3.0823  | 3.9229  | -0.5863 |
| CEU | HIST2 | 150245687 | 5.0921  | 5.7991  | -0.3502 |
| CEU | HIST2 | 150250687 | 5.711   | 5.1169  | 0.3288  |
| CEU | HIST2 | 150255687 | 6.4828  | 5.9697  | 0.2476  |
| CEU | HIST2 | 150260687 | 13.1734 | 8.8692  | 1.4484  |
| CEU | HIST2 | 150265687 | 18.7497 | 10.4043 | 2.4209  |
| CEU | HIST2 | 150270687 | 15.7213 | 10.916  | 1.3328  |
| CEU | HIST2 | 150275687 | 13.4298 | 10.916  | 0.6972  |

## 2\_TajimasD\_data

|     |       |           |         |         |         |
|-----|-------|-----------|---------|---------|---------|
| CEU | HIST2 | 150280687 | 17.3247 | 11.5982 | 1.5004  |
| CEU | HIST2 | 150285687 | 13.5617 | 8.6987  | 1.666   |
| CEU | HIST2 | 150290687 | 9.0524  | 6.3108  | 1.2587  |
| CEU | HIST2 | 150295687 | 9.6066  | 7.8459  | 0.6633  |
| CEU | HIST2 | 150300687 | 8.1362  | 7.6753  | 0.1772  |
| CEU | HIST2 | 150305687 | 9.2167  | 8.5281  | 0.2403  |
| CEU | HIST2 | 150310687 | 10.6481 | 9.3809  | 0.4048  |
| CEU | HIST2 | 150315687 | 11.8046 | 10.2337 | 0.4628  |
| CEU | HIST2 | 150320687 | 14.108  | 10.4043 | 1.0744  |
| CEU | HIST2 | 150325687 | 14.2341 | 9.7221  | 1.3943  |
| CEU | HIST2 | 150330687 | 12.7087 | 9.2104  | 1.1368  |
| CEU | HIST2 | 150335687 | 11.0529 | 9.2104  | 0.5987  |
| CHB | HIST2 | 149345687 | 4.5724  | 7.1154  | -1.0443 |
| CHB | HIST2 | 149350687 | 5.6311  | 7.2848  | -0.6647 |
| CHB | HIST2 | 149355687 | 6.0879  | 6.0989  | -0.0052 |
| CHB | HIST2 | 149360687 | 4.6375  | 4.2354  | 0.2618  |
| CHB | HIST2 | 149365687 | 3.221   | 3.5577  | -0.2545 |
| CHB | HIST2 | 149370687 | 2.7124  | 4.5742  | -1.1337 |
| CHB | HIST2 | 149375687 | 3.3482  | 5.9295  | -1.2496 |
| CHB | HIST2 | 149380687 | 3.0503  | 4.5742  | -0.9279 |
| CHB | HIST2 | 149385687 | 3.5802  | 4.913   | -0.7624 |
| CHB | HIST2 | 149390687 | 5.4818  | 6.2684  | -0.3623 |
| CHB | HIST2 | 149395687 | 3.443   | 4.913   | -0.8408 |
| CHB | HIST2 | 149400687 | 4.6943  | 5.9295  | -0.598  |
| CHB | HIST2 | 149405687 | 4.6316  | 5.7601  | -0.5607 |
| CHB | HIST2 | 149410687 | 3.5648  | 4.913   | -0.7712 |
| CHB | HIST2 | 149415687 | 4.3147  | 4.2354  | 0.0516  |
| CHB | HIST2 | 149420687 | 2.0497  | 3.0495  | -0.8598 |
| CHB | HIST2 | 149425687 | 1.641   | 3.3883  | -1.376  |
| CHB | HIST2 | 149430687 | 1.9248  | 3.5577  | -1.2341 |
| CHB | HIST2 | 149435687 | 1.051   | 2.033   | -1.171  |
| CHB | HIST2 | 149440687 | 0       | 0       | 0       |
| CHB | HIST2 | 149445687 | 0.0386  | 0.5082  | -1.4741 |
| CHB | HIST2 | 149450687 | 0.0774  | 1.0165  | -1.8689 |
| CHB | HIST2 | 149455687 | 0.0873  | 1.1859  | -1.961  |
| CHB | HIST2 | 149460687 | 0.0485  | 0.6777  | -1.6449 |
| CHB | HIST2 | 149465687 | 0       | 0       | 0       |
| CHB | HIST2 | 149470687 | 0       | 0       | 0       |
| CHB | HIST2 | 149475687 | 0       | 0       | 0       |
| CHB | HIST2 | 149480687 | 0       | 0       | 0       |
| CHB | HIST2 | 149485687 | 0       | 0       | 0       |
| CHB | HIST2 | 149490687 | 0       | 0       | 0       |
| CHB | HIST2 | 149495687 | 0       | 0       | 0       |
| CHB | HIST2 | 149500687 | 0       | 0       | 0       |
| CHB | HIST2 | 149505687 | 0.3379  | 0.3388  | -0.0036 |
| CHB | HIST2 | 149510687 | 0.8968  | 1.0165  | -0.2382 |
| CHB | HIST2 | 149515687 | 0.5686  | 0.8471  | -0.628  |
| CHB | HIST2 | 149520687 | 0.0097  | 0.1694  | -0.949  |
| CHB | HIST2 | 149525687 | 0       | 0       | 0       |

## 2\_TajimasD\_data

|     |       |           |        |        |         |
|-----|-------|-----------|--------|--------|---------|
| CHB | HIST2 | 149530687 | 0.2578 | 0.1694 | 0.5253  |
| CHB | HIST2 | 149535687 | 0.2578 | 0.1694 | 0.5253  |
| CHB | HIST2 | 149540687 | 0      | 0      | 0       |
| CHB | HIST2 | 149545687 | 0      | 0      | 0       |
| CHB | HIST2 | 149550687 | 0      | 0      | 0       |
| CHB | HIST2 | 149555687 | 0      | 0      | 0       |
| CHB | HIST2 | 149560687 | 0      | 0      | 0       |
| CHB | HIST2 | 149565687 | 0.0097 | 0.1694 | -0.949  |
| CHB | HIST2 | 149570687 | 0.4891 | 0.5082 | -0.06   |
| CHB | HIST2 | 149575687 | 0.9039 | 0.8471 | 0.1281  |
| CHB | HIST2 | 149580687 | 2.7101 | 3.0495 | -0.2919 |
| CHB | HIST2 | 149585687 | 4.0702 | 3.8965 | 0.1215  |
| CHB | HIST2 | 149590687 | 2.2336 | 1.8636 | 0.4721  |
| CHB | HIST2 | 149595687 | 2.0855 | 1.8636 | 0.2831  |
| CHB | HIST2 | 149600687 | 4.4603 | 2.5412 | 1.9164  |
| CHB | HIST2 | 149605687 | 6.8024 | 4.7436 | 1.2144  |
| CHB | HIST2 | 149610687 | 5.6592 | 5.0825 | 0.3202  |
| CHB | HIST2 | 149615687 | 1.6806 | 1.5247 | 0.2316  |
| CHB | HIST2 | 149620687 | 0      | 0      | 0       |
| CHB | HIST2 | 149625687 | 0      | 0      | 0       |
| CHB | HIST2 | 149630687 | 0.0097 | 0.1694 | -0.949  |
| CHB | HIST2 | 149635687 | 0.0769 | 0.6777 | -1.5707 |
| CHB | HIST2 | 149640687 | 3.3649 | 2.3718 | 1.0483  |
| CHB | HIST2 | 149645687 | 7.6918 | 5.9295 | 0.8532  |
| CHB | HIST2 | 149650687 | 7.8726 | 6.946  | 0.3889  |
| CHB | HIST2 | 149655687 | 5.2022 | 5.7601 | -0.2772 |
| CHB | HIST2 | 149660687 | 5.0558 | 5.0825 | -0.0148 |
| CHB | HIST2 | 149665687 | 7.7653 | 5.5907 | 1.1095  |
| CHB | HIST2 | 149670687 | 8.0883 | 7.9625 | 0.0466  |
| CHB | HIST2 | 149675687 | 6.3802 | 7.2848 | -0.3636 |
| CHB | HIST2 | 149680687 | 3.6421 | 5.2519 | -0.8682 |
| CHB | HIST2 | 149685687 | 2.1883 | 4.5742 | -1.4528 |
| CHB | HIST2 | 149690687 | 2.3844 | 4.2354 | -1.205  |
| CHB | HIST2 | 149695687 | 4.4445 | 4.5742 | -0.079  |
| CHB | HIST2 | 149700687 | 6.0059 | 6.2684 | -0.1209 |
| CHB | HIST2 | 149705687 | 6.3994 | 6.6072 | -0.0913 |
| CHB | HIST2 | 149710687 | 6.15   | 5.5907 | 0.2854  |
| CHB | HIST2 | 149715687 | 7.6463 | 7.7931 | -0.0555 |
| CHB | HIST2 | 149720687 | 8.6215 | 9.6567 | -0.321  |
| CHB | HIST2 | 149725687 | 6.38   | 9.1484 | -0.9026 |
| CHB | HIST2 | 149730687 | 5.727  | 7.2848 | -0.6262 |
| CHB | HIST2 | 149735687 | 4.4731 | 5.5907 | -0.5702 |
| CHB | HIST2 | 149740687 | 2.0782 | 3.3883 | -1.0317 |
| CHB | HIST2 | 149745687 | 3.8763 | 3.0495 | 0.7111  |
| CHB | HIST2 | 149750687 | 3.6467 | 3.2189 | 0.3517  |
| CHB | HIST2 | 149755687 | 0.5134 | 3.5577 | -2.3007 |
| CHB | HIST2 | 149760687 | 2.1626 | 7.1154 | -2.034  |
| CHB | HIST2 | 149765687 | 1.8871 | 5.2519 | -1.8147 |
| CHB | HIST2 | 149770687 | 1.2717 | 4.913  | -2.0828 |

## 2\_TajimasD\_data

|     |       |           |        |         |         |
|-----|-------|-----------|--------|---------|---------|
| CHB | HIST2 | 149775687 | 1.5793 | 5.9295  | -2.106  |
| CHB | HIST2 | 149780687 | 1.044  | 4.913   | -2.2131 |
| CHB | HIST2 | 149785687 | 0.8346 | 5.5907  | -2.4267 |
| CHB | HIST2 | 149790687 | 0.4318 | 3.8965  | -2.4233 |
| CHB | HIST2 | 149795687 | 0.2187 | 1.3553  | -1.8421 |
| CHB | HIST2 | 149800687 | 0      | 0       | 0       |
| CHB | HIST2 | 149805687 | 0      | 0       | 0       |
| CHB | HIST2 | 149810687 | 0.3718 | 0.8471  | -1.0718 |
| CHB | HIST2 | 149815687 | 1.1116 | 3.7271  | -1.9001 |
| CHB | HIST2 | 149820687 | 1.2703 | 4.7436  | -2.0488 |
| CHB | HIST2 | 149825687 | 0.5306 | 1.8636  | -1.7007 |
| CHB | HIST2 | 149830687 | 0      | 0       | 0       |
| CHB | HIST2 | 149835687 | 0      | 0       | 0       |
| CHB | HIST2 | 149840687 | 0.0192 | 0.1694  | -0.8925 |
| CHB | HIST2 | 149845687 | 0.4614 | 3.5577  | -2.34   |
| CHB | HIST2 | 149850687 | 1.0985 | 7.6237  | -2.5163 |
| CHB | HIST2 | 149855687 | 1.0963 | 6.6072  | -2.4204 |
| CHB | HIST2 | 149860687 | 1.3382 | 5.9295  | -2.2227 |
| CHB | HIST2 | 149865687 | 1.5333 | 7.1154  | -2.2924 |
| CHB | HIST2 | 149870687 | 0.9307 | 6.6072  | -2.4932 |
| CHB | HIST2 | 149875687 | 1.3126 | 5.7601  | -2.2096 |
| CHB | HIST2 | 149880687 | 1.6813 | 6.6072  | -2.1635 |
| CHB | HIST2 | 149885687 | 1.1645 | 6.4378  | -2.371  |
| CHB | HIST2 | 149890687 | 1.7339 | 5.7601  | -2.0003 |
| CHB | HIST2 | 149895687 | 1.6018 | 7.9625  | -2.3571 |
| CHB | HIST2 | 149900687 | 1.0234 | 7.2848  | -2.5169 |
| CHB | HIST2 | 149905687 | 1.7475 | 6.4378  | -2.1089 |
| CHB | HIST2 | 149910687 | 2.1027 | 7.7931  | -2.1507 |
| CHB | HIST2 | 149915687 | 1.8938 | 6.6072  | -2.0702 |
| CHB | HIST2 | 149920687 | 2.7419 | 8.4708  | -2.0055 |
| CHB | HIST2 | 149925687 | 3.7428 | 10.5037 | -1.9383 |
| CHB | HIST2 | 149930687 | 2.8961 | 9.4872  | -2.0777 |
| CHB | HIST2 | 149935687 | 2.3034 | 10.1649 | -2.324  |
| CHB | HIST2 | 149940687 | 2.5589 | 8.6402  | -2.0904 |
| CHB | HIST2 | 149945687 | 2.2937 | 6.2684  | -1.8306 |
| CHB | HIST2 | 149950687 | 2.0594 | 8.1319  | -2.2072 |
| CHB | HIST2 | 149955687 | 1.5694 | 8.1319  | -2.3853 |
| CHB | HIST2 | 149960687 | 1.34   | 6.0989  | -2.2464 |
| CHB | HIST2 | 149965687 | 1.0556 | 6.2684  | -2.4008 |
| CHB | HIST2 | 149970687 | 1.3541 | 5.5907  | -2.1616 |
| CHB | HIST2 | 149975687 | 1.9322 | 5.0825  | -1.749  |
| CHB | HIST2 | 149980687 | 1.5441 | 6.7766  | -2.2461 |
| CHB | HIST2 | 149985687 | 2.2104 | 8.6402  | -2.2102 |
| CHB | HIST2 | 149990687 | 3.5818 | 9.1484  | -1.8149 |
| CHB | HIST2 | 149995687 | 6.1018 | 10.5037 | -1.262  |
| CHB | HIST2 | 150000687 | 6.3783 | 11.8591 | -1.4022 |
| CHB | HIST2 | 150005687 | 3.3267 | 9.6567  | -1.9628 |
| CHB | HIST2 | 150010687 | 2.1784 | 9.9955  | -2.3473 |
| CHB | HIST2 | 150015687 | 2.0027 | 9.8261  | -2.3869 |

## 2\_TajimasD\_data

|     |       |           |        |         |         |
|-----|-------|-----------|--------|---------|---------|
| CHB | HIST2 | 150020687 | 1.6358 | 7.9625  | -2.3445 |
| CHB | HIST2 | 150025687 | 1.5127 | 8.8096  | -2.4636 |
| CHB | HIST2 | 150030687 | 0.8881 | 6.946   | -2.5429 |
| CHB | HIST2 | 150035687 | 1.1696 | 5.7601  | -2.2807 |
| CHB | HIST2 | 150040687 | 2.1565 | 6.946   | -2.0104 |
| CHB | HIST2 | 150045687 | 1.6029 | 7.4543  | -2.3033 |
| CHB | HIST2 | 150050687 | 1.0029 | 6.6072  | -2.4615 |
| CHB | HIST2 | 150055687 | 1.0727 | 5.5907  | -2.3052 |
| CHB | HIST2 | 150060687 | 0.8376 | 5.7601  | -2.4456 |
| CHB | HIST2 | 150065687 | 0.6575 | 5.4213  | -2.498  |
| CHB | HIST2 | 150070687 | 1.1749 | 6.7766  | -2.4046 |
| CHB | HIST2 | 150075687 | 1.3139 | 7.6237  | -2.4332 |
| CHB | HIST2 | 150080687 | 0.6514 | 5.2519  | -2.4812 |
| CHB | HIST2 | 150085687 | 1.284  | 6.0989  | -2.2728 |
| CHB | HIST2 | 150090687 | 1.8519 | 6.7766  | -2.114  |
| CHB | HIST2 | 150095687 | 1.4727 | 6.0989  | -2.1838 |
| CHB | HIST2 | 150100687 | 1.4289 | 7.1154  | -2.3353 |
| CHB | HIST2 | 150105687 | 1.8089 | 7.4543  | -2.2222 |
| CHB | HIST2 | 150110687 | 1.3745 | 7.1154  | -2.3576 |
| CHB | HIST2 | 150115687 | 1.0927 | 6.7766  | -2.4399 |
| CHB | HIST2 | 150120687 | 1.8646 | 7.4543  | -2.2003 |
| CHB | HIST2 | 150125687 | 2.1251 | 7.7931  | -2.1422 |
| CHB | HIST2 | 150130687 | 2.8204 | 8.8096  | -2.0221 |
| CHB | HIST2 | 150135687 | 2.7987 | 9.1484  | -2.0702 |
| CHB | HIST2 | 150140687 | 2.1439 | 9.1484  | -2.2837 |
| CHB | HIST2 | 150145687 | 2.355  | 8.6402  | -2.1605 |
| CHB | HIST2 | 150150687 | 2.4295 | 8.3013  | -2.0942 |
| CHB | HIST2 | 150155687 | 3.0849 | 12.1979 | -2.2704 |
| CHB | HIST2 | 150160687 | 4.1354 | 12.3673 | -2.0244 |
| CHB | HIST2 | 150165687 | 8.7834 | 10.5037 | -0.4932 |
| CHB | HIST2 | 150170687 | 8.739  | 9.9955  | -0.3773 |
| CHB | HIST2 | 150175687 | 5.2113 | 9.6567  | -1.3784 |
| CHB | HIST2 | 150180687 | 6.8188 | 9.6567  | -0.88   |
| CHB | HIST2 | 150185687 | 6.084  | 8.4708  | -0.8356 |
| CHB | HIST2 | 150190687 | 4.4631 | 7.2848  | -1.1342 |
| CHB | HIST2 | 150195687 | 5.8497 | 6.946   | -0.4602 |
| CHB | HIST2 | 150200687 | 8.5654 | 9.4872  | -0.2906 |
| CHB | HIST2 | 150205687 | 9.3992 | 10.8426 | -0.4017 |
| CHB | HIST2 | 150210687 | 8.6789 | 11.1814 | -0.6767 |
| CHB | HIST2 | 150215687 | 7.9109 | 11.012  | -0.8506 |
| CHB | HIST2 | 150220687 | 6.8538 | 8.6402  | -0.6141 |
| CHB | HIST2 | 150225687 | 4.09   | 7.6237  | -1.3627 |
| CHB | HIST2 | 150230687 | 2.1388 | 5.7601  | -1.7991 |
| CHB | HIST2 | 150235687 | 2.7594 | 3.8965  | -0.7953 |
| CHB | HIST2 | 150240687 | 3.8892 | 5.0825  | -0.6625 |
| CHB | HIST2 | 150245687 | 5.4599 | 7.1154  | -0.6799 |
| CHB | HIST2 | 150250687 | 4.8018 | 7.9625  | -1.1713 |
| CHB | HIST2 | 150255687 | 4.8943 | 7.9625  | -1.137  |
| CHB | HIST2 | 150260687 | 9.53   | 9.4872  | 0.0135  |

## 2\_TajimasD\_data

|     |       |           |         |         |         |
|-----|-------|-----------|---------|---------|---------|
| CHB | HIST2 | 150265687 | 13.7822 | 11.1814 | 0.7032  |
| CHB | HIST2 | 150270687 | 10.9701 | 10.5037 | 0.1337  |
| CHB | HIST2 | 150275687 | 8.6457  | 10.3343 | -0.4915 |
| CHB | HIST2 | 150280687 | 11.9424 | 13.2144 | -0.2938 |
| CHB | HIST2 | 150285687 | 9.4067  | 10.6731 | -0.3577 |
| CHB | HIST2 | 150290687 | 6.5976  | 8.3013  | -0.6076 |
| CHB | HIST2 | 150295687 | 6.5739  | 9.3178  | -0.8795 |
| CHB | HIST2 | 150300687 | 5.6868  | 8.4708  | -0.9746 |
| CHB | HIST2 | 150305687 | 7.1887  | 10.1649 | -0.8798 |
| CHB | HIST2 | 150310687 | 7.1759  | 9.3178  | -0.6866 |
| CHB | HIST2 | 150315687 | 7.3663  | 8.979   | -0.535  |
| CHB | HIST2 | 150320687 | 10.0327 | 11.3508 | -0.3514 |
| CHB | HIST2 | 150325687 | 10.672  | 12.3673 | -0.4169 |
| CHB | HIST2 | 150330687 | 8.5642  | 11.5202 | -0.7772 |
| CHB | HIST2 | 150335687 | 6.9526  | 8.4708  | -0.5315 |
| YRI | HIST2 | 149345687 | 5.5964  | 8.235   | -0.9448 |
| YRI | HIST2 | 149350687 | 7.6952  | 9.0754  | -0.4518 |
| YRI | HIST2 | 149355687 | 7.8101  | 7.2267  | 0.2354  |
| YRI | HIST2 | 149360687 | 5.4838  | 6.8906  | -0.5928 |
| YRI | HIST2 | 149365687 | 3.6761  | 7.3947  | -1.4694 |
| YRI | HIST2 | 149370687 | 3.0298  | 6.0502  | -1.4311 |
| YRI | HIST2 | 149375687 | 4.6279  | 8.235   | -1.2915 |
| YRI | HIST2 | 149380687 | 4.0569  | 7.0586  | -1.2375 |
| YRI | HIST2 | 149385687 | 5.5465  | 5.2099  | 0.1822  |
| YRI | HIST2 | 149390687 | 7.9415  | 7.5628  | 0.1466  |
| YRI | HIST2 | 149395687 | 5.1813  | 7.2267  | -0.8254 |
| YRI | HIST2 | 149400687 | 6.5498  | 8.4031  | -0.6514 |
| YRI | HIST2 | 149405687 | 6.9294  | 9.0754  | -0.7025 |
| YRI | HIST2 | 149410687 | 5.6369  | 8.4031  | -0.9722 |
| YRI | HIST2 | 149415687 | 5.0759  | 5.8822  | -0.3918 |
| YRI | HIST2 | 149420687 | 3.4411  | 3.0251  | 0.3589  |
| YRI | HIST2 | 149425687 | 3.4028  | 4.0335  | -0.4267 |
| YRI | HIST2 | 149430687 | 2.5774  | 4.0335  | -0.9852 |
| YRI | HIST2 | 149435687 | 1.1793  | 1.8487  | -0.8562 |
| YRI | HIST2 | 149440687 | 0.0278  | 0.3361  | -1.2377 |
| YRI | HIST2 | 149445687 | 0.1568  | 0.5042  | -1.0918 |
| YRI | HIST2 | 149450687 | 0.2572  | 1.0084  | -1.4977 |
| YRI | HIST2 | 149455687 | 0.5682  | 1.5126  | -1.4063 |
| YRI | HIST2 | 149460687 | 0.4678  | 1.0084  | -1.0778 |
| YRI | HIST2 | 149465687 | 0       | 0       | 0       |
| YRI | HIST2 | 149470687 | 0       | 0       | 0       |
| YRI | HIST2 | 149475687 | 0       | 0       | 0       |
| YRI | HIST2 | 149480687 | 0       | 0       | 0       |
| YRI | HIST2 | 149485687 | 0       | 0       | 0       |
| YRI | HIST2 | 149490687 | 0       | 0       | 0       |
| YRI | HIST2 | 149495687 | 0       | 0       | 0       |
| YRI | HIST2 | 149500687 | 0       | 0       | 0       |
| YRI | HIST2 | 149505687 | 0.3128  | 0.3361  | -0.0935 |
| YRI | HIST2 | 149510687 | 0.6674  | 2.0167  | -1.6133 |

## 2\_TajimasD\_data

|     |       |           |         |         |         |
|-----|-------|-----------|---------|---------|---------|
| YRI | HIST2 | 149515687 | 0.5881  | 2.1848  | -1.7927 |
| YRI | HIST2 | 149520687 | 0.2335  | 0.5042  | -0.8507 |
| YRI | HIST2 | 149525687 | 0.073   | 0.3361  | -1.0562 |
| YRI | HIST2 | 149530687 | 0.2339  | 0.5042  | -0.8495 |
| YRI | HIST2 | 149535687 | 0.1609  | 0.1681  | -0.0428 |
| YRI | HIST2 | 149540687 | 0       | 0       | 0       |
| YRI | HIST2 | 149545687 | 0       | 0       | 0       |
| YRI | HIST2 | 149550687 | 0       | 0       | 0       |
| YRI | HIST2 | 149555687 | 0       | 0       | 0       |
| YRI | HIST2 | 149560687 | 0       | 0       | 0       |
| YRI | HIST2 | 149565687 | 0.0278  | 0.3361  | -1.2377 |
| YRI | HIST2 | 149570687 | 0.6448  | 0.8403  | -0.4416 |
| YRI | HIST2 | 149575687 | 1.082   | 1.3445  | -0.4263 |
| YRI | HIST2 | 149580687 | 2.3976  | 5.2099  | -1.5222 |
| YRI | HIST2 | 149585687 | 2.8328  | 6.0502  | -1.5244 |
| YRI | HIST2 | 149590687 | 1.2306  | 2.5209  | -1.2922 |
| YRI | HIST2 | 149595687 | 1.8514  | 2.5209  | -0.6705 |
| YRI | HIST2 | 149600687 | 3.8506  | 3.8654  | -0.0104 |
| YRI | HIST2 | 149605687 | 5.3659  | 6.0502  | -0.3242 |
| YRI | HIST2 | 149610687 | 4.8085  | 6.3864  | -0.7122 |
| YRI | HIST2 | 149615687 | 1.7722  | 2.5209  | -0.7498 |
| YRI | HIST2 | 149620687 | 0       | 0       | 0       |
| YRI | HIST2 | 149625687 | 0       | 0       | 0       |
| YRI | HIST2 | 149630687 | 0.0093  | 0.1681  | -0.944  |
| YRI | HIST2 | 149635687 | 0.3558  | 0.8403  | -1.0943 |
| YRI | HIST2 | 149640687 | 3.6547  | 2.8571  | 0.7213  |
| YRI | HIST2 | 149645687 | 8.4209  | 8.067   | 0.1291  |
| YRI | HIST2 | 149650687 | 9.9648  | 11.2602 | -0.3468 |
| YRI | HIST2 | 149655687 | 8.3394  | 8.7392  | -0.1355 |
| YRI | HIST2 | 149660687 | 7.1161  | 8.067   | -0.347  |
| YRI | HIST2 | 149665687 | 9.7576  | 11.7644 | -0.5156 |
| YRI | HIST2 | 149670687 | 10.5671 | 14.1172 | -0.7676 |
| YRI | HIST2 | 149675687 | 7.2322  | 11.0921 | -1.048  |
| YRI | HIST2 | 149680687 | 4.6278  | 9.2434  | -1.4854 |
| YRI | HIST2 | 149685687 | 3.2238  | 9.0754  | -1.9155 |
| YRI | HIST2 | 149690687 | 2.5511  | 6.3864  | -1.731  |
| YRI | HIST2 | 149695687 | 4.3393  | 7.0586  | -1.121  |
| YRI | HIST2 | 149700687 | 7.644   | 10.4199 | -0.7991 |
| YRI | HIST2 | 149705687 | 8.8619  | 11.7644 | -0.7457 |
| YRI | HIST2 | 149710687 | 7.1213  | 10.756  | -1.0157 |
| YRI | HIST2 | 149715687 | 8.7912  | 11.5963 | -0.7305 |
| YRI | HIST2 | 149720687 | 9.7433  | 13.2769 | -0.8098 |
| YRI | HIST2 | 149725687 | 7.8402  | 13.7811 | -1.3143 |
| YRI | HIST2 | 149730687 | 7.4415  | 12.7727 | -1.2674 |
| YRI | HIST2 | 149735687 | 6.0543  | 8.7392  | -0.9101 |
| YRI | HIST2 | 149740687 | 4.2073  | 6.0502  | -0.8732 |
| YRI | HIST2 | 149745687 | 6.7209  | 7.2267  | -0.2041 |
| YRI | HIST2 | 149750687 | 7.0974  | 8.5712  | -0.5086 |
| YRI | HIST2 | 149755687 | 4.927   | 8.067   | -1.1458 |



## 2\_TajimasD\_data

|     |       |           |         |         |         |
|-----|-------|-----------|---------|---------|---------|
| YRI | HIST2 | 149760687 | 6.5569  | 10.924  | -1.2028 |
| YRI | HIST2 | 149765687 | 3.9928  | 9.2434  | -1.6898 |
| YRI | HIST2 | 149770687 | 4.6881  | 9.4115  | -1.4949 |
| YRI | HIST2 | 149775687 | 6.6059  | 13.9492 | -1.606  |
| YRI | HIST2 | 149780687 | 5.4091  | 13.9492 | -1.8677 |
| YRI | HIST2 | 149785687 | 4.6848  | 11.7644 | -1.8188 |
| YRI | HIST2 | 149790687 | 2.5421  | 6.7225  | -1.8013 |
| YRI | HIST2 | 149795687 | 0.794   | 2.1848  | -1.5616 |
| YRI | HIST2 | 149800687 | 0       | 0       | 0       |
| YRI | HIST2 | 149805687 | 0       | 0       | 0       |
| YRI | HIST2 | 149810687 | 1.771   | 2.0167  | -0.2938 |
| YRI | HIST2 | 149815687 | 4.0118  | 6.8906  | -1.213  |
| YRI | HIST2 | 149820687 | 3.7656  | 6.7225  | -1.2741 |
| YRI | HIST2 | 149825687 | 1.5248  | 1.8487  | -0.4143 |
| YRI | HIST2 | 149830687 | 0       | 0       | 0       |
| YRI | HIST2 | 149835687 | 0       | 0       | 0       |
| YRI | HIST2 | 149840687 | 0.3604  | 0.8403  | -1.0839 |
| YRI | HIST2 | 149845687 | 3.0805  | 6.7225  | -1.5693 |
| YRI | HIST2 | 149850687 | 5.8194  | 14.1172 | -1.7942 |
| YRI | HIST2 | 149855687 | 3.9958  | 11.9324 | -2.0119 |
| YRI | HIST2 | 149860687 | 3.8139  | 10.4199 | -1.9017 |
| YRI | HIST2 | 149865687 | 7.9343  | 13.2769 | -1.2244 |
| YRI | HIST2 | 149870687 | 7.8361  | 12.6047 | -1.1479 |
| YRI | HIST2 | 149875687 | 5.392   | 11.4282 | -1.5936 |
| YRI | HIST2 | 149880687 | 7.045   | 11.0921 | -1.0988 |
| YRI | HIST2 | 149885687 | 7.3283  | 11.7644 | -1.1397 |
| YRI | HIST2 | 149890687 | 5.8105  | 12.2685 | -1.5948 |
| YRI | HIST2 | 149895687 | 5.1829  | 12.6047 | -1.7866 |
| YRI | HIST2 | 149900687 | 3.6505  | 11.7644 | -2.0845 |
| YRI | HIST2 | 149905687 | 5.0059  | 11.0921 | -1.6524 |
| YRI | HIST2 | 149910687 | 7.2868  | 12.4366 | -1.2555 |
| YRI | HIST2 | 149915687 | 5.952   | 12.7727 | -1.6215 |
| YRI | HIST2 | 149920687 | 6.3749  | 12.9408 | -1.5418 |
| YRI | HIST2 | 149925687 | 8.9958  | 14.1172 | -1.1074 |
| YRI | HIST2 | 149930687 | 9.4189  | 13.9492 | -0.9908 |
| YRI | HIST2 | 149935687 | 8.8358  | 12.4366 | -0.8779 |
| YRI | HIST2 | 149940687 | 6.8566  | 10.756  | -1.0897 |
| YRI | HIST2 | 149945687 | 4.9945  | 8.9073  | -1.3032 |
| YRI | HIST2 | 149950687 | 7.1591  | 10.2518 | -0.9039 |
| YRI | HIST2 | 149955687 | 8.1103  | 11.4282 | -0.8759 |
| YRI | HIST2 | 149960687 | 5.1239  | 9.5795  | -1.3872 |
| YRI | HIST2 | 149965687 | 5.1618  | 8.9073  | -1.2475 |
| YRI | HIST2 | 149970687 | 6.9734  | 9.2434  | -0.7305 |
| YRI | HIST2 | 149975687 | 7.4001  | 10.0837 | -0.7965 |
| YRI | HIST2 | 149980687 | 7.1825  | 10.4199 | -0.9319 |
| YRI | HIST2 | 149985687 | 9.275   | 11.9324 | -0.6736 |
| YRI | HIST2 | 149990687 | 9.5777  | 13.2769 | -0.8478 |
| YRI | HIST2 | 149995687 | 11.7908 | 15.1256 | -0.6753 |
| YRI | HIST2 | 150000687 | 14.6298 | 14.7895 | -0.033  |

## 2\_TajimasD\_data

|     |       |           |         |         |         |
|-----|-------|-----------|---------|---------|---------|
| YRI | HIST2 | 150005687 | 11.7842 | 14.1172 | -0.5045 |
| YRI | HIST2 | 150010687 | 14.8799 | 17.6465 | -0.4835 |
| YRI | HIST2 | 150015687 | 16.5702 | 16.8062 | -0.0432 |
| YRI | HIST2 | 150020687 | 12.3487 | 14.6214 | -0.4753 |
| YRI | HIST2 | 150025687 | 12.6453 | 15.1256 | -0.5022 |
| YRI | HIST2 | 150030687 | 10.6271 | 12.6047 | -0.4761 |
| YRI | HIST2 | 150035687 | 6.6803  | 9.7476  | -0.9396 |
| YRI | HIST2 | 150040687 | 10.3483 | 14.1172 | -0.8149 |
| YRI | HIST2 | 150045687 | 13.0111 | 16.302  | -0.6204 |
| YRI | HIST2 | 150050687 | 8.9108  | 13.2769 | -1.0006 |
| YRI | HIST2 | 150055687 | 7.464   | 13.1089 | -1.3094 |
| YRI | HIST2 | 150060687 | 9.8941  | 13.613  | -0.8324 |
| YRI | HIST2 | 150065687 | 8.4815  | 12.2685 | -0.9352 |
| YRI | HIST2 | 150070687 | 7.9696  | 13.613  | -1.2631 |
| YRI | HIST2 | 150075687 | 11.9678 | 15.7978 | -0.744  |
| YRI | HIST2 | 150080687 | 10.8321 | 15.2937 | -0.894  |
| YRI | HIST2 | 150085687 | 12.3291 | 16.302  | -0.749  |
| YRI | HIST2 | 150090687 | 14.1904 | 15.1256 | -0.1894 |
| YRI | HIST2 | 150095687 | 11.748  | 14.2853 | -0.5425 |
| YRI | HIST2 | 150100687 | 12.2606 | 14.7895 | -0.5232 |
| YRI | HIST2 | 150105687 | 12.2568 | 16.9743 | -0.8556 |
| YRI | HIST2 | 150110687 | 9.807   | 15.4617 | -1.1213 |
| YRI | HIST2 | 150115687 | 7.898   | 13.2769 | -1.2328 |
| YRI | HIST2 | 150120687 | 8.5946  | 14.9575 | -1.3022 |
| YRI | HIST2 | 150125687 | 8.636   | 13.9492 | -1.162  |
| YRI | HIST2 | 150130687 | 11.6966 | 16.8062 | -0.9356 |
| YRI | HIST2 | 150135687 | 13.6467 | 18.991  | -0.8703 |
| YRI | HIST2 | 150140687 | 10.6132 | 15.7978 | -1.0072 |
| YRI | HIST2 | 150145687 | 8.2985  | 12.9408 | -1.0901 |
| YRI | HIST2 | 150150687 | 10.0282 | 12.9408 | -0.6839 |
| YRI | HIST2 | 150155687 | 15.6957 | 16.8062 | -0.2033 |
| YRI | HIST2 | 150160687 | 15.7906 | 18.6549 | -0.4745 |
| YRI | HIST2 | 150165687 | 13.9296 | 16.9743 | -0.5522 |
| YRI | HIST2 | 150170687 | 12.2884 | 16.302  | -0.7566 |
| YRI | HIST2 | 150175687 | 11.0381 | 14.7895 | -0.7761 |
| YRI | HIST2 | 150180687 | 12.6705 | 14.2853 | -0.3453 |
| YRI | HIST2 | 150185687 | 10.9232 | 14.1172 | -0.6906 |
| YRI | HIST2 | 150190687 | 9.3911  | 11.5963 | -0.5742 |
| YRI | HIST2 | 150195687 | 9.1269  | 9.9157  | -0.2378 |
| YRI | HIST2 | 150200687 | 9.6844  | 10.0837 | -0.1185 |
| YRI | HIST2 | 150205687 | 11.4763 | 12.2685 | -0.1956 |
| YRI | HIST2 | 150210687 | 13.2729 | 14.9575 | -0.3448 |
| YRI | HIST2 | 150215687 | 13.8174 | 14.7895 | -0.2011 |
| YRI | HIST2 | 150220687 | 10.9399 | 10.924  | 0.0044  |
| YRI | HIST2 | 150225687 | 6.2934  | 8.9073  | -0.8706 |
| YRI | HIST2 | 150230687 | 3.7123  | 8.7392  | -1.704  |
| YRI | HIST2 | 150235687 | 2.8731  | 6.3864  | -1.5857 |
| YRI | HIST2 | 150240687 | 4.2078  | 7.8989  | -1.3732 |
| YRI | HIST2 | 150245687 | 6.2699  | 10.924  | -1.2818 |

## 2\_TajimasD\_data

|     |       |           |         |         |         |
|-----|-------|-----------|---------|---------|---------|
| YRI | HIST2 | 150250687 | 6.3516  | 10.5879 | -1.2014 |
| YRI | HIST2 | 150255687 | 7.0664  | 9.4115  | -0.7422 |
| YRI | HIST2 | 150260687 | 14.1165 | 12.9408 | 0.2761  |
| YRI | HIST2 | 150265687 | 19.3635 | 16.6382 | 0.5038  |
| YRI | HIST2 | 150270687 | 15.2574 | 15.4617 | -0.0405 |
| YRI | HIST2 | 150275687 | 13.9662 | 15.7978 | -0.3558 |
| YRI | HIST2 | 150280687 | 15.4575 | 16.302  | -0.1592 |
| YRI | HIST2 | 150285687 | 11.2587 | 12.2685 | -0.2494 |
| YRI | HIST2 | 150290687 | 8.8346  | 11.4282 | -0.6847 |
| YRI | HIST2 | 150295687 | 10.1552 | 13.1089 | -0.6852 |
| YRI | HIST2 | 150300687 | 10.7939 | 12.4366 | -0.4005 |
| YRI | HIST2 | 150305687 | 12.0064 | 14.2853 | -0.4873 |
| YRI | HIST2 | 150310687 | 12.2611 | 13.445  | -0.2681 |
| YRI | HIST2 | 150315687 | 13.7686 | 13.1089 | 0.153   |
| YRI | HIST2 | 150320687 | 14.4169 | 15.4617 | -0.2072 |
| YRI | HIST2 | 150325687 | 13.1102 | 14.9575 | -0.3781 |
| YRI | HIST2 | 150330687 | 12.7934 | 13.2769 | -0.1108 |
| YRI | HIST2 | 150335687 | 10.758  | 12.2685 | -0.373  |
| CEU | HIST2 | 149347218 | 6.0408  | 5.458   | 0.3047  |
| CEU | HIST2 | 149352218 | 6.0998  | 6.3108  | -0.0969 |
| CEU | HIST2 | 149357218 | 5.3072  | 5.6286  | -0.1635 |
| CEU | HIST2 | 149362218 | 4.7357  | 5.1169  | -0.211  |
| CEU | HIST2 | 149367218 | 3.5933  | 3.9229  | -0.2299 |
| CEU | HIST2 | 149372218 | 3.9252  | 4.9463  | -0.5823 |
| CEU | HIST2 | 149377218 | 4.537   | 5.458   | -0.4815 |
| CEU | HIST2 | 149382218 | 3.6968  | 3.9229  | -0.1577 |
| CEU | HIST2 | 149387218 | 5.1558  | 4.2641  | 0.5788  |
| CEU | HIST2 | 149392218 | 6.3327  | 5.9697  | 0.1752  |
| CEU | HIST2 | 149397218 | 4.8079  | 5.7991  | -0.4909 |
| CEU | HIST2 | 149402218 | 5.9221  | 5.7991  | 0.0609  |
| CEU | HIST2 | 149407218 | 5.0206  | 4.7757  | 0.144   |
| CEU | HIST2 | 149412218 | 4.3467  | 3.4112  | 0.7348  |
| CEU | HIST2 | 149417218 | 4.1068  | 3.2407  | 0.7102  |
| CEU | HIST2 | 149422218 | 2.0165  | 1.8762  | 0.1786  |
| CEU | HIST2 | 149427218 | 2.7172  | 2.729   | -0.0112 |
| CEU | HIST2 | 149432218 | 2.2187  | 2.5584  | -0.3384 |
| CEU | HIST2 | 149437218 | 0.5232  | 0.6822  | -0.4152 |
| CEU | HIST2 | 149442218 | 0       | 0       | 0       |
| CEU | HIST2 | 149447218 | 0.08    | 0.5117  | -1.3539 |
| CEU | HIST2 | 149452218 | 0.1394  | 0.8528  | -1.6066 |
| CEU | HIST2 | 149457218 | 0.128   | 0.6822  | -1.4472 |
| CEU | HIST2 | 149462218 | 0.0686  | 0.3411  | -1.0924 |
| CEU | HIST2 | 149467218 | 0       | 0       | 0       |
| CEU | HIST2 | 149472218 | 0       | 0       | 0       |
| CEU | HIST2 | 149477218 | 0       | 0       | 0       |
| CEU | HIST2 | 149482218 | 0       | 0       | 0       |
| CEU | HIST2 | 149487218 | 0       | 0       | 0       |
| CEU | HIST2 | 149492218 | 0       | 0       | 0       |
| CEU | HIST2 | 149497218 | 0       | 0       | 0       |

## 2\_TajimasD\_data

|     |       |           |         |        |         |
|-----|-------|-----------|---------|--------|---------|
| CEU | HIST2 | 149502218 | 0       | 0      | 0       |
| CEU | HIST2 | 149507218 | 0.1363  | 0.5117 | -1.1774 |
| CEU | HIST2 | 149512218 | 0.4605  | 1.1939 | -1.3069 |
| CEU | HIST2 | 149517218 | 0.3243  | 0.6822 | -0.9346 |
| CEU | HIST2 | 149522218 | 0       | 0      | 0       |
| CEU | HIST2 | 149527218 | 0       | 0      | 0       |
| CEU | HIST2 | 149532218 | 0.0101  | 0.1706 | -0.9534 |
| CEU | HIST2 | 149537218 | 0.0101  | 0.1706 | -0.9534 |
| CEU | HIST2 | 149542218 | 0       | 0      | 0       |
| CEU | HIST2 | 149547218 | 0       | 0      | 0       |
| CEU | HIST2 | 149552218 | 0       | 0      | 0       |
| CEU | HIST2 | 149557218 | 0       | 0      | 0       |
| CEU | HIST2 | 149562218 | 0       | 0      | 0       |
| CEU | HIST2 | 149567218 | 0.5038  | 0.1706 | 1.9793  |
| CEU | HIST2 | 149572218 | 0.885   | 0.6822 | 0.5296  |
| CEU | HIST2 | 149577218 | 0.3812  | 0.5117 | -0.4093 |
| CEU | HIST2 | 149582218 | 2.8182  | 3.2407 | -0.3464 |
| CEU | HIST2 | 149587218 | 3.8     | 3.7524 | 0.0345  |
| CEU | HIST2 | 149592218 | 1.7355  | 1.3645 | 0.6002  |
| CEU | HIST2 | 149597218 | 2.4286  | 2.8996 | -0.4236 |
| CEU | HIST2 | 149602218 | 6.2946  | 5.1169 | 0.6519  |
| CEU | HIST2 | 149607218 | 7.5261  | 4.6052 | 1.7734  |
| CEU | HIST2 | 149612218 | 3.7706  | 2.2173 | 1.7353  |
| CEU | HIST2 | 149617218 | 0.8642  | 0.6822 | 0.4753  |
| CEU | HIST2 | 149622218 | 0       | 0      | 0       |
| CEU | HIST2 | 149627218 | 0.0301  | 0.1706 | -0.8346 |
| CEU | HIST2 | 149632218 | 0.0301  | 0.1706 | -0.8346 |
| CEU | HIST2 | 149637218 | 2.3997  | 1.7056 | 0.9507  |
| CEU | HIST2 | 149642218 | 3.1884  | 2.8996 | 0.2597  |
| CEU | HIST2 | 149647218 | 7.4811  | 6.6519 | 0.363   |
| CEU | HIST2 | 149652218 | 8.4589  | 6.8225 | 0.7002  |
| CEU | HIST2 | 149657218 | 4.3451  | 3.2407 | 0.9056  |
| CEU | HIST2 | 149662218 | 6.0134  | 6.3108 | -0.1365 |
| CEU | HIST2 | 149667218 | 5.1579  | 9.2104 | -1.3168 |
| CEU | HIST2 | 149672218 | 5.47    | 9.3809 | -1.2494 |
| CEU | HIST2 | 149677218 | 5.5494  | 7.3342 | -0.7151 |
| CEU | HIST2 | 149682218 | 2.4492  | 4.4346 | -1.2457 |
| CEU | HIST2 | 149687218 | 0.9386  | 3.4112 | -1.942  |
| CEU | HIST2 | 149692218 | 1.3713  | 3.2407 | -1.5329 |
| CEU | HIST2 | 149697218 | 2.8957  | 5.1169 | -1.2295 |
| CEU | HIST2 | 149702218 | 5.0012  | 6.8225 | -0.7793 |
| CEU | HIST2 | 149707218 | 7.6804  | 6.9931 | 0.2876  |
| CEU | HIST2 | 149712218 | 8.5538  | 7.5047 | 0.4116  |
| CEU | HIST2 | 149717218 | 10.6112 | 8.5281 | 0.7268  |
| CEU | HIST2 | 149722218 | 9.7798  | 7.1636 | 1.0709  |
| CEU | HIST2 | 149727218 | 6.7895  | 6.4814 | 0.1381  |
| CEU | HIST2 | 149732218 | 5.9891  | 5.7991 | 0.0941  |
| CEU | HIST2 | 149737218 | 3.3206  | 3.5818 | -0.1969 |
| CEU | HIST2 | 149742218 | 2.2494  | 3.2407 | -0.8128 |

## 2\_TajimasD\_data

|     |       |           |        |        |         |
|-----|-------|-----------|--------|--------|---------|
| CEU | HIST2 | 149747218 | 4.6417 | 3.9229 | 0.5013  |
| CEU | HIST2 | 149752218 | 3.605  | 3.4112 | 0.1522  |
| CEU | HIST2 | 149757218 | 1.7541 | 3.0701 | -1.1288 |
| CEU | HIST2 | 149762218 | 2.309  | 5.1169 | -1.5542 |
| CEU | HIST2 | 149767218 | 2.269  | 5.458  | -1.6671 |
| CEU | HIST2 | 149772218 | 3.0989 | 5.6286 | -1.2868 |
| CEU | HIST2 | 149777218 | 4.6702 | 6.6519 | -0.8676 |
| CEU | HIST2 | 149782218 | 5.5527 | 8.0164 | -0.91   |
| CEU | HIST2 | 149787218 | 3.9497 | 7.3342 | -1.3561 |
| CEU | HIST2 | 149792218 | 1.4871 | 3.0701 | -1.3579 |
| CEU | HIST2 | 149797218 | 0.1235 | 0.1706 | -0.2798 |
| CEU | HIST2 | 149802218 | 0      | 0      | 0       |
| CEU | HIST2 | 149807218 | 0      | 0      | 0       |
| CEU | HIST2 | 149812218 | 1.3752 | 1.8762 | -0.6379 |
| CEU | HIST2 | 149817218 | 2.6199 | 4.0935 | -0.9909 |
| CEU | HIST2 | 149822218 | 1.8312 | 2.5584 | -0.7244 |
| CEU | HIST2 | 149827218 | 0.5865 | 0.3411 | 0.9837  |
| CEU | HIST2 | 149832218 | 0      | 0      | 0       |
| CEU | HIST2 | 149837218 | 0      | 0      | 0       |
| CEU | HIST2 | 149842218 | 0.8703 | 1.3645 | -0.7995 |
| CEU | HIST2 | 149847218 | 2.0313 | 3.9229 | -1.3193 |
| CEU | HIST2 | 149852218 | 2.3896 | 5.2874 | -1.5582 |
| CEU | HIST2 | 149857218 | 2.8143 | 6.3108 | -1.6053 |
| CEU | HIST2 | 149862218 | 3.9306 | 7.5047 | -1.4023 |
| CEU | HIST2 | 149867218 | 4.9634 | 8.5281 | -1.2438 |
| CEU | HIST2 | 149872218 | 4.7279 | 7.5047 | -1.0895 |
| CEU | HIST2 | 149877218 | 4.0565 | 6.4814 | -1.0869 |
| CEU | HIST2 | 149882218 | 2.6912 | 5.1169 | -1.3427 |
| CEU | HIST2 | 149887218 | 2.3436 | 3.9229 | -1.1015 |
| CEU | HIST2 | 149892218 | 3.5081 | 4.6052 | -0.6661 |
| CEU | HIST2 | 149897218 | 3.3513 | 5.2874 | -1.041  |
| CEU | HIST2 | 149902218 | 3.5549 | 5.7991 | -1.1115 |
| CEU | HIST2 | 149907218 | 3.9946 | 5.7991 | -0.8938 |
| CEU | HIST2 | 149912218 | 2.021  | 4.4346 | -1.5144 |
| CEU | HIST2 | 149917218 | 1.3774 | 3.9229 | -1.7754 |
| CEU | HIST2 | 149922218 | 3.7236 | 5.1169 | -0.7712 |
| CEU | HIST2 | 149927218 | 4.4919 | 5.458  | -0.5051 |
| CEU | HIST2 | 149932218 | 2.6372 | 5.7991 | -1.5661 |
| CEU | HIST2 | 149937218 | 2.0641 | 4.9463 | -1.6437 |
| CEU | HIST2 | 149942218 | 2.6215 | 3.7524 | -0.8193 |
| CEU | HIST2 | 149947218 | 2.2478 | 4.0935 | -1.2411 |
| CEU | HIST2 | 149952218 | 2.9812 | 5.9697 | -1.4423 |
| CEU | HIST2 | 149957218 | 2.1484 | 4.4346 | -1.4344 |
| CEU | HIST2 | 149962218 | 1.0019 | 2.3879 | -1.4596 |
| CEU | HIST2 | 149967218 | 1.9435 | 3.4112 | -1.1528 |
| CEU | HIST2 | 149972218 | 2.1725 | 3.7524 | -1.1446 |
| CEU | HIST2 | 149977218 | 2.0581 | 3.9229 | -1.3006 |
| CEU | HIST2 | 149982218 | 2.6574 | 4.9463 | -1.3054 |
| CEU | HIST2 | 149987218 | 3.6749 | 5.9697 | -1.1075 |

## 2\_TajimasD\_data

|     |       |           |         |         |         |
|-----|-------|-----------|---------|---------|---------|
| CEU | HIST2 | 149992218 | 6.3636  | 7.8459  | -0.5584 |
| CEU | HIST2 | 149997218 | 9.5217  | 8.6987  | 0.282   |
| CEU | HIST2 | 150002218 | 8.3725  | 6.9931  | 0.5772  |
| CEU | HIST2 | 150007218 | 7.7545  | 7.3342  | 0.1684  |
| CEU | HIST2 | 150012218 | 10.5403 | 9.0398  | 0.4961  |
| CEU | HIST2 | 150017218 | 10.7794 | 8.8692  | 0.6428  |
| CEU | HIST2 | 150022218 | 9.1606  | 7.8459  | 0.4953  |
| CEU | HIST2 | 150027218 | 5.7079  | 5.9697  | -0.1263 |
| CEU | HIST2 | 150032218 | 1.9462  | 4.2641  | -1.5046 |
| CEU | HIST2 | 150037218 | 3.0062  | 5.9697  | -1.4302 |
| CEU | HIST2 | 150042218 | 4.5046  | 6.4814  | -0.886  |
| CEU | HIST2 | 150047218 | 4.4902  | 5.458   | -0.5059 |
| CEU | HIST2 | 150052218 | 3.1923  | 4.9463  | -1.0003 |
| CEU | HIST2 | 150057218 | 2.1128  | 4.4346  | -1.4568 |
| CEU | HIST2 | 150062218 | 3.0056  | 4.7757  | -1.0411 |
| CEU | HIST2 | 150067218 | 1.987   | 3.2407  | -1.028  |
| CEU | HIST2 | 150072218 | 5.5576  | 5.2874  | 0.1453  |
| CEU | HIST2 | 150077218 | 7.7425  | 7.8459  | -0.039  |
| CEU | HIST2 | 150082218 | 3.4447  | 5.7991  | -1.1661 |
| CEU | HIST2 | 150087218 | 2.7961  | 6.6519  | -1.6881 |
| CEU | HIST2 | 150092218 | 3.7225  | 6.6519  | -1.2825 |
| CEU | HIST2 | 150097218 | 4.2762  | 5.1169  | -0.4653 |
| CEU | HIST2 | 150102218 | 5.1591  | 6.8225  | -0.7118 |
| CEU | HIST2 | 150107218 | 6.2472  | 6.8225  | -0.2462 |
| CEU | HIST2 | 150112218 | 5.381   | 5.458   | -0.0403 |
| CEU | HIST2 | 150117218 | 3.2653  | 4.6052  | -0.8135 |
| CEU | HIST2 | 150122218 | 3.677   | 6.3108  | -1.2092 |
| CEU | HIST2 | 150127218 | 4.8244  | 8.0164  | -1.179  |
| CEU | HIST2 | 150132218 | 6.0334  | 8.8692  | -0.9543 |
| CEU | HIST2 | 150137218 | 7.2057  | 11.9394 | -1.2069 |
| CEU | HIST2 | 150142218 | 6.4966  | 9.5515  | -0.9597 |
| CEU | HIST2 | 150147218 | 5.0724  | 6.3108  | -0.5686 |
| CEU | HIST2 | 150152218 | 3.22    | 7.1636  | -1.6143 |
| CEU | HIST2 | 150157218 | 5.1905  | 9.0398  | -1.2727 |
| CEU | HIST2 | 150162218 | 8.7335  | 9.5515  | -0.257  |
| CEU | HIST2 | 150167218 | 9.7998  | 8.0164  | 0.6587  |
| CEU | HIST2 | 150172218 | 8.5918  | 6.9931  | 0.6689  |
| CEU | HIST2 | 150177218 | 6.8242  | 5.7991  | 0.5077  |
| CEU | HIST2 | 150182218 | 7.4803  | 6.1402  | 0.6306  |
| CEU | HIST2 | 150187218 | 6.154   | 6.4814  | -0.1467 |
| CEU | HIST2 | 150192218 | 5.8207  | 6.1402  | -0.1503 |
| CEU | HIST2 | 150197218 | 8.0969  | 6.4814  | 0.7241  |
| CEU | HIST2 | 150202218 | 9.269   | 6.9931  | 0.9523  |
| CEU | HIST2 | 150207218 | 9.4055  | 8.0164  | 0.5131  |
| CEU | HIST2 | 150212218 | 8.7671  | 7.1636  | 0.6564  |
| CEU | HIST2 | 150217218 | 8.7254  | 6.6519  | 0.9078  |
| CEU | HIST2 | 150222218 | 7.2614  | 6.3108  | 0.4364  |
| CEU | HIST2 | 150227218 | 3.3078  | 4.4346  | -0.707  |
| CEU | HIST2 | 150232218 | 2.2224  | 3.5818  | -1.0246 |

## 2\_TajimasD\_data

|     |       |           |         |         |         |
|-----|-------|-----------|---------|---------|---------|
| CEU | HIST2 | 150237218 | 3.1212  | 2.8996  | 0.1993  |
| CEU | HIST2 | 150242218 | 2.7774  | 3.9229  | -0.799  |
| CEU | HIST2 | 150247218 | 4.9716  | 5.458   | -0.2543 |
| CEU | HIST2 | 150252218 | 5.4418  | 5.1169  | 0.1798  |
| CEU | HIST2 | 150257218 | 8.0536  | 7.1636  | 0.3643  |
| CEU | HIST2 | 150262218 | 14.4719 | 9.0398  | 1.796   |
| CEU | HIST2 | 150267218 | 19.1497 | 10.7454 | 2.3656  |
| CEU | HIST2 | 150272218 | 17.2167 | 11.7688 | 1.4079  |
| CEU | HIST2 | 150277218 | 13.6498 | 10.7454 | 0.8175  |
| CEU | HIST2 | 150282218 | 15.1563 | 10.7454 | 1.2415  |
| CEU | HIST2 | 150287218 | 12.5504 | 8.187   | 1.5808  |
| CEU | HIST2 | 150292218 | 10.1462 | 7.1636  | 1.2209  |
| CEU | HIST2 | 150297218 | 9.1539  | 7.8459  | 0.4927  |
| CEU | HIST2 | 150302218 | 8.0121  | 7.5047  | 0.1991  |
| CEU | HIST2 | 150307218 | 10.0324 | 8.8692  | 0.3914  |
| CEU | HIST2 | 150312218 | 10.6691 | 9.3809  | 0.4115  |
| CEU | HIST2 | 150317218 | 12.6151 | 10.4043 | 0.6413  |
| CEU | HIST2 | 150322218 | 14.0898 | 10.0632 | 1.205   |
| CEU | HIST2 | 150327218 | 13.2813 | 9.5515  | 1.1718  |
| CEU | HIST2 | 150332218 | 12.0168 | 9.3809  | 0.8421  |
| CEU | HIST2 | 150337218 | 10.1044 | 8.8692  | 0.4156  |
| CHB | HIST2 | 149347218 | 5.6195  | 7.4543  | -0.7222 |
| CHB | HIST2 | 149352218 | 5.0348  | 6.7766  | -0.7477 |
| CHB | HIST2 | 149357218 | 4.5631  | 5.2519  | -0.3715 |
| CHB | HIST2 | 149362218 | 4.1312  | 4.066   | 0.044   |
| CHB | HIST2 | 149367218 | 3.1955  | 4.066   | -0.587  |
| CHB | HIST2 | 149372218 | 2.7969  | 5.0825  | -1.2689 |
| CHB | HIST2 | 149377218 | 3.2859  | 5.0825  | -0.9974 |
| CHB | HIST2 | 149382218 | 3.0581  | 3.8965  | -0.5864 |
| CHB | HIST2 | 149387218 | 4.0619  | 5.4213  | -0.7128 |
| CHB | HIST2 | 149392218 | 4.9155  | 5.7601  | -0.4196 |
| CHB | HIST2 | 149397218 | 4.0552  | 5.4213  | -0.7163 |
| CHB | HIST2 | 149402218 | 4.8488  | 6.4378  | -0.7145 |
| CHB | HIST2 | 149407218 | 3.478   | 4.913   | -0.8208 |
| CHB | HIST2 | 149412218 | 3.9303  | 4.7436  | -0.4797 |
| CHB | HIST2 | 149417218 | 4.2513  | 4.2354  | 0.0104  |
| CHB | HIST2 | 149422218 | 1.5298  | 2.8801  | -1.2174 |
| CHB | HIST2 | 149427218 | 1.9996  | 3.8965  | -1.3267 |
| CHB | HIST2 | 149432218 | 1.8957  | 3.2189  | -1.0879 |
| CHB | HIST2 | 149437218 | 0.4087  | 1.0165  | -1.2096 |
| CHB | HIST2 | 149442218 | 0       | 0       | 0       |
| CHB | HIST2 | 149447218 | 0.0386  | 0.5082  | -1.4741 |
| CHB | HIST2 | 149452218 | 0.1065  | 1.3553  | -2.0239 |
| CHB | HIST2 | 149457218 | 0.0873  | 1.1859  | -1.961  |
| CHB | HIST2 | 149462218 | 0.0194  | 0.3388  | -1.2812 |
| CHB | HIST2 | 149467218 | 0       | 0       | 0       |
| CHB | HIST2 | 149472218 | 0       | 0       | 0       |
| CHB | HIST2 | 149477218 | 0       | 0       | 0       |
| CHB | HIST2 | 149482218 | 0       | 0       | 0       |

## 2\_TajimasD\_data

|     |       |           |        |        |         |
|-----|-------|-----------|--------|--------|---------|
| CHB | HIST2 | 149487218 | 0      | 0      | 0       |
| CHB | HIST2 | 149492218 | 0      | 0      | 0       |
| CHB | HIST2 | 149497218 | 0      | 0      | 0       |
| CHB | HIST2 | 149502218 | 0      | 0      | 0       |
| CHB | HIST2 | 149507218 | 0.6275 | 0.5082 | 0.3745  |
| CHB | HIST2 | 149512218 | 0.8968 | 1.0165 | -0.2382 |
| CHB | HIST2 | 149517218 | 0.2791 | 0.6777 | -1.0421 |
| CHB | HIST2 | 149522218 | 0.0097 | 0.1694 | -0.949  |
| CHB | HIST2 | 149527218 | 0      | 0      | 0       |
| CHB | HIST2 | 149532218 | 0.2578 | 0.1694 | 0.5253  |
| CHB | HIST2 | 149537218 | 0.2578 | 0.1694 | 0.5253  |
| CHB | HIST2 | 149542218 | 0      | 0      | 0       |
| CHB | HIST2 | 149547218 | 0      | 0      | 0       |
| CHB | HIST2 | 149552218 | 0      | 0      | 0       |
| CHB | HIST2 | 149557218 | 0      | 0      | 0       |
| CHB | HIST2 | 149562218 | 0      | 0      | 0       |
| CHB | HIST2 | 149567218 | 0.4601 | 0.3388 | 0.4866  |
| CHB | HIST2 | 149572218 | 0.9039 | 0.8471 | 0.1281  |
| CHB | HIST2 | 149577218 | 0.4535 | 0.6777 | -0.5861 |
| CHB | HIST2 | 149582218 | 3.3082 | 3.3883 | -0.0631 |
| CHB | HIST2 | 149587218 | 4.0702 | 3.8965 | 0.1215  |
| CHB | HIST2 | 149592218 | 1.2206 | 1.1859 | 0.0619  |
| CHB | HIST2 | 149597218 | 2.9082 | 2.2024 | 0.7903  |
| CHB | HIST2 | 149602218 | 7.3659 | 4.7436 | 1.5468  |
| CHB | HIST2 | 149607218 | 7.0862 | 5.4213 | 0.873   |
| CHB | HIST2 | 149612218 | 2.7537 | 2.8801 | -0.114  |
| CHB | HIST2 | 149617218 | 0.574  | 0.5082 | 0.2066  |
| CHB | HIST2 | 149622218 | 0      | 0      | 0       |
| CHB | HIST2 | 149627218 | 0.0097 | 0.1694 | -0.949  |
| CHB | HIST2 | 149632218 | 0.0097 | 0.1694 | -0.949  |
| CHB | HIST2 | 149637218 | 2.8808 | 1.5247 | 2.0147  |
| CHB | HIST2 | 149642218 | 4.2753 | 3.7271 | 0.3983  |
| CHB | HIST2 | 149647218 | 7.5328 | 6.7766 | 0.3246  |
| CHB | HIST2 | 149652218 | 7.1211 | 5.9295 | 0.5769  |
| CHB | HIST2 | 149657218 | 3.0921 | 4.5742 | -0.9025 |
| CHB | HIST2 | 149662218 | 5.9966 | 5.4213 | 0.3017  |
| CHB | HIST2 | 149667218 | 7.7836 | 6.4378 | 0.6051  |
| CHB | HIST2 | 149672218 | 8.1593 | 8.6402 | -0.1653 |
| CHB | HIST2 | 149677218 | 6.0198 | 6.2684 | -0.1145 |
| CHB | HIST2 | 149682218 | 2.9364 | 4.5742 | -0.9973 |
| CHB | HIST2 | 149687218 | 2.285  | 4.4048 | -1.3339 |
| CHB | HIST2 | 149692218 | 3.198  | 4.2354 | -0.6753 |
| CHB | HIST2 | 149697218 | 4.2222 | 4.7436 | -0.3076 |
| CHB | HIST2 | 149702218 | 5.9206 | 6.6072 | -0.3016 |
| CHB | HIST2 | 149707218 | 7.5389 | 7.6237 | -0.0327 |
| CHB | HIST2 | 149712218 | 6.6324 | 6.0989 | 0.2518  |
| CHB | HIST2 | 149717218 | 7.9216 | 8.4708 | -0.1923 |
| CHB | HIST2 | 149722218 | 7.9966 | 9.3178 | -0.4235 |
| CHB | HIST2 | 149727218 | 6.5829 | 8.4708 | -0.6609 |



## 2\_TajimasD\_data

|     |       |           |        |         |         |
|-----|-------|-----------|--------|---------|---------|
| CHB | HIST2 | 149732218 | 5.7443 | 7.1154  | -0.5631 |
| CHB | HIST2 | 149737218 | 2.7881 | 4.2354  | -0.9422 |
| CHB | HIST2 | 149742218 | 1.5443 | 3.0495  | -1.2945 |
| CHB | HIST2 | 149747218 | 3.8763 | 3.0495  | 0.7111  |
| CHB | HIST2 | 149752218 | 3.2829 | 3.0495  | 0.2007  |
| CHB | HIST2 | 149757218 | 1.0577 | 5.2519  | -2.2621 |
| CHB | HIST2 | 149762218 | 1.9924 | 6.6072  | -2.0269 |
| CHB | HIST2 | 149767218 | 2.2781 | 4.5742  | -1.3981 |
| CHB | HIST2 | 149772218 | 1.3008 | 5.4213  | -2.1607 |
| CHB | HIST2 | 149777218 | 0.7826 | 5.2519  | -2.4104 |
| CHB | HIST2 | 149782218 | 1.0246 | 4.5742  | -2.1614 |
| CHB | HIST2 | 149787218 | 0.744  | 5.7601  | -2.4921 |
| CHB | HIST2 | 149792218 | 0.422  | 3.7271  | -2.4011 |
| CHB | HIST2 | 149797218 | 0.1611 | 0.6777  | -1.3505 |
| CHB | HIST2 | 149802218 | 0      | 0       | 0       |
| CHB | HIST2 | 149807218 | 0      | 0       | 0       |
| CHB | HIST2 | 149812218 | 0.4588 | 1.6942  | -1.6954 |
| CHB | HIST2 | 149817218 | 1.2566 | 5.2519  | -2.1548 |
| CHB | HIST2 | 149822218 | 1.1833 | 3.8965  | -1.8977 |
| CHB | HIST2 | 149827218 | 0.3855 | 0.3388  | 0.1873  |
| CHB | HIST2 | 149832218 | 0      | 0       | 0       |
| CHB | HIST2 | 149837218 | 0      | 0       | 0       |
| CHB | HIST2 | 149842218 | 0.2393 | 1.1859  | -1.6897 |
| CHB | HIST2 | 149847218 | 0.5099 | 4.4048  | -2.4509 |
| CHB | HIST2 | 149852218 | 0.9464 | 7.7931  | -2.5877 |
| CHB | HIST2 | 149857218 | 1.4982 | 6.4378  | -2.221  |
| CHB | HIST2 | 149862218 | 1.3862 | 6.0989  | -2.2246 |
| CHB | HIST2 | 149867218 | 1.1507 | 7.1154  | -2.4495 |
| CHB | HIST2 | 149872218 | 1.1392 | 5.9295  | -2.3191 |
| CHB | HIST2 | 149877218 | 1.6109 | 6.7766  | -2.2175 |
| CHB | HIST2 | 149882218 | 1.7217 | 6.946   | -2.193  |
| CHB | HIST2 | 149887218 | 1.2667 | 5.7601  | -2.2324 |
| CHB | HIST2 | 149892218 | 1.5431 | 6.6072  | -2.2242 |
| CHB | HIST2 | 149897218 | 1.1624 | 7.1154  | -2.4447 |
| CHB | HIST2 | 149902218 | 1.4296 | 7.1154  | -2.335  |
| CHB | HIST2 | 149907218 | 2.6127 | 8.1319  | -2.0061 |
| CHB | HIST2 | 149912218 | 1.5806 | 6.7766  | -2.2305 |
| CHB | HIST2 | 149917218 | 1.1064 | 6.2684  | -2.3774 |
| CHB | HIST2 | 149922218 | 3.506  | 8.8096  | -1.7906 |
| CHB | HIST2 | 149927218 | 4.3588 | 10.8426 | -1.8045 |
| CHB | HIST2 | 149932218 | 2.1807 | 10.3343 | -2.3734 |
| CHB | HIST2 | 149937218 | 2.0573 | 9.3178  | -2.3273 |
| CHB | HIST2 | 149942218 | 2.9625 | 8.1319  | -1.8789 |
| CHB | HIST2 | 149947218 | 2.0714 | 6.4378  | -1.9633 |
| CHB | HIST2 | 149952218 | 1.9591 | 7.6237  | -2.1844 |
| CHB | HIST2 | 149957218 | 1.4021 | 7.7931  | -2.4155 |
| CHB | HIST2 | 149962218 | 1.0171 | 6.4378  | -2.4373 |
| CHB | HIST2 | 149967218 | 1.0364 | 6.2684  | -2.4097 |
| CHB | HIST2 | 149972218 | 1.3438 | 4.913   | -2.0416 |

## 2\_TajimasD\_data

|     |       |           |        |         |         |
|-----|-------|-----------|--------|---------|---------|
| CHB | HIST2 | 149977218 | 1.9513 | 4.913   | -1.6941 |
| CHB | HIST2 | 149982218 | 1.8032 | 7.6237  | -2.2445 |
| CHB | HIST2 | 149987218 | 2.5589 | 9.1484  | -2.1484 |
| CHB | HIST2 | 149992218 | 4.3701 | 9.9955  | -1.6892 |
| CHB | HIST2 | 149997218 | 6.7369 | 11.012  | -1.1726 |
| CHB | HIST2 | 150002218 | 5.3594 | 10.3343 | -1.4481 |
| CHB | HIST2 | 150007218 | 2.9322 | 9.9955  | -2.121  |
| CHB | HIST2 | 150012218 | 2.1689 | 9.9955  | -2.3502 |
| CHB | HIST2 | 150017218 | 1.5214 | 8.979   | -2.4739 |
| CHB | HIST2 | 150022218 | 1.7038 | 8.6402  | -2.3843 |
| CHB | HIST2 | 150027218 | 1.3857 | 8.4708  | -2.4803 |
| CHB | HIST2 | 150032218 | 1.0946 | 6.6072  | -2.4212 |
| CHB | HIST2 | 150037218 | 1.8289 | 6.6072  | -2.0987 |
| CHB | HIST2 | 150042218 | 1.9958 | 7.2848  | -2.126  |
| CHB | HIST2 | 150047218 | 0.9147 | 6.4378  | -2.4834 |
| CHB | HIST2 | 150052218 | 1.0657 | 6.6072  | -2.4339 |
| CHB | HIST2 | 150057218 | 1.158  | 6.0989  | -2.3323 |
| CHB | HIST2 | 150062218 | 0.613  | 4.913   | -2.4596 |
| CHB | HIST2 | 150067218 | 0.5722 | 4.913   | -2.4829 |
| CHB | HIST2 | 150072218 | 1.3189 | 7.4543  | -2.4151 |
| CHB | HIST2 | 150077218 | 1.3522 | 7.9625  | -2.4496 |
| CHB | HIST2 | 150082218 | 0.8626 | 5.0825  | -2.3428 |
| CHB | HIST2 | 150087218 | 1.2939 | 6.0989  | -2.2682 |
| CHB | HIST2 | 150092218 | 1.5829 | 6.7766  | -2.2295 |
| CHB | HIST2 | 150097218 | 1.5108 | 6.2684  | -2.1912 |
| CHB | HIST2 | 150102218 | 1.5997 | 7.9625  | -2.3579 |
| CHB | HIST2 | 150107218 | 1.8289 | 7.7931  | -2.2542 |
| CHB | HIST2 | 150112218 | 1.4472 | 6.0989  | -2.1958 |
| CHB | HIST2 | 150117218 | 1.3547 | 6.0989  | -2.2395 |
| CHB | HIST2 | 150122218 | 2.2429 | 7.7931  | -2.0977 |
| CHB | HIST2 | 150127218 | 2.2012 | 7.7931  | -2.1134 |
| CHB | HIST2 | 150132218 | 2.1033 | 8.1319  | -2.1912 |
| CHB | HIST2 | 150137218 | 2.4602 | 9.8261  | -2.2473 |
| CHB | HIST2 | 150142218 | 2.7236 | 9.6567  | -2.1498 |
| CHB | HIST2 | 150147218 | 2.7567 | 8.6402  | -2.0224 |
| CHB | HIST2 | 150152218 | 1.9176 | 8.8096  | -2.3269 |
| CHB | HIST2 | 150157218 | 2.7124 | 12.5367 | -2.3852 |
| CHB | HIST2 | 150162218 | 6.518  | 12.0285 | -1.3911 |
| CHB | HIST2 | 150167218 | 9.8096 | 9.9955  | -0.0558 |
| CHB | HIST2 | 150172218 | 7.4525 | 10.3343 | -0.8389 |
| CHB | HIST2 | 150177218 | 5.6126 | 9.9955  | -1.3161 |
| CHB | HIST2 | 150182218 | 6.6275 | 9.4872  | -0.9014 |
| CHB | HIST2 | 150187218 | 4.5117 | 7.1154  | -1.0693 |
| CHB | HIST2 | 150192218 | 4.5803 | 7.1154  | -1.0411 |
| CHB | HIST2 | 150197218 | 8.1406 | 8.8096  | -0.2259 |
| CHB | HIST2 | 150202218 | 9.248  | 9.8261  | -0.1764 |
| CHB | HIST2 | 150207218 | 8.6806 | 11.3508 | -0.7119 |
| CHB | HIST2 | 150212218 | 7.9743 | 11.5202 | -0.9323 |
| CHB | HIST2 | 150217218 | 7.8589 | 9.9955  | -0.6416 |

## 2\_TajimasD\_data

|     |       |           |         |         |         |
|-----|-------|-----------|---------|---------|---------|
| CHB | HIST2 | 150222218 | 6.5275  | 8.4708  | -0.6803 |
| CHB | HIST2 | 150227218 | 2.9787  | 6.4378  | -1.5553 |
| CHB | HIST2 | 150232218 | 2.1346  | 4.7436  | -1.539  |
| CHB | HIST2 | 150237218 | 3.2612  | 4.2354  | -0.6342 |
| CHB | HIST2 | 150242218 | 3.414   | 5.5907  | -1.1106 |
| CHB | HIST2 | 150247218 | 4.5978  | 7.4543  | -1.1244 |
| CHB | HIST2 | 150252218 | 4.7691  | 7.4543  | -1.057  |
| CHB | HIST2 | 150257218 | 6.7619  | 8.1319  | -0.498  |
| CHB | HIST2 | 150262218 | 10.4298 | 10.3343 | 0.0278  |
| CHB | HIST2 | 150267218 | 13.5743 | 11.8591 | 0.4388  |
| CHB | HIST2 | 150272218 | 11.6577 | 10.5037 | 0.3308  |
| CHB | HIST2 | 150277218 | 8.6513  | 10.3343 | -0.4899 |
| CHB | HIST2 | 150282218 | 10.7638 | 12.8755 | -0.4999 |
| CHB | HIST2 | 150287218 | 9.3432  | 10.5037 | -0.3327 |
| CHB | HIST2 | 150292218 | 6.6992  | 8.3013  | -0.5714 |
| CHB | HIST2 | 150297218 | 5.754   | 8.6402  | -0.9921 |
| CHB | HIST2 | 150302218 | 5.8606  | 8.6402  | -0.9554 |
| CHB | HIST2 | 150307218 | 7.4055  | 10.5037 | -0.8882 |
| CHB | HIST2 | 150312218 | 7.8418  | 9.3178  | -0.4731 |
| CHB | HIST2 | 150317218 | 9.1085  | 9.6567  | -0.17   |
| CHB | HIST2 | 150322218 | 9.2867  | 11.3508 | -0.5503 |
| CHB | HIST2 | 150327218 | 9.107   | 12.0285 | -0.7375 |
| CHB | HIST2 | 150332218 | 8.5134  | 11.5202 | -0.7905 |
| CHB | HIST2 | 150337218 | 6.4127  | 8.1319  | -0.6249 |
| YRI | HIST2 | 149347218 | 6.9479  | 8.9073  | -0.6526 |
| YRI | HIST2 | 149352218 | 6.9164  | 8.4031  | -0.5225 |
| YRI | HIST2 | 149357218 | 5.8626  | 7.0586  | -0.4931 |
| YRI | HIST2 | 149362218 | 4.6115  | 6.8906  | -0.9603 |
| YRI | HIST2 | 149367218 | 4.07    | 6.7225  | -1.143  |
| YRI | HIST2 | 149372218 | 3.7664  | 7.7309  | -1.5042 |
| YRI | HIST2 | 149377218 | 4.0781  | 7.5628  | -1.349  |
| YRI | HIST2 | 149382218 | 4.3368  | 5.5461  | -0.6193 |
| YRI | HIST2 | 149387218 | 6.2057  | 5.8822  | 0.1572  |
| YRI | HIST2 | 149392218 | 6.8524  | 7.2267  | -0.151  |
| YRI | HIST2 | 149397218 | 5.2869  | 7.2267  | -0.7827 |
| YRI | HIST2 | 149402218 | 7.196   | 8.7392  | -0.5231 |
| YRI | HIST2 | 149407218 | 6.2313  | 8.9073  | -0.8913 |
| YRI | HIST2 | 149412218 | 5.3871  | 7.7309  | -0.8893 |
| YRI | HIST2 | 149417218 | 5.4485  | 5.5461  | -0.05   |
| YRI | HIST2 | 149422218 | 2.9105  | 2.8571  | 0.0483  |
| YRI | HIST2 | 149427218 | 3.035   | 4.2016  | -0.7621 |
| YRI | HIST2 | 149432218 | 2.5498  | 3.8654  | -0.9232 |
| YRI | HIST2 | 149437218 | 0.7064  | 1.1764  | -0.8406 |
| YRI | HIST2 | 149442218 | 0.0185  | 0.1681  | -0.8893 |
| YRI | HIST2 | 149447218 | 0.1568  | 0.5042  | -1.0918 |
| YRI | HIST2 | 149452218 | 0.4181  | 1.1764  | -1.3563 |
| YRI | HIST2 | 149457218 | 0.5682  | 1.5126  | -1.4063 |
| YRI | HIST2 | 149462218 | 0.3069  | 0.8403  | -1.2048 |
| YRI | HIST2 | 149467218 | 0       | 0       | 0       |

## 2\_TajimasD\_data

|     |       |           |         |         |         |
|-----|-------|-----------|---------|---------|---------|
| YRI | HIST2 | 149472218 | 0       | 0       | 0       |
| YRI | HIST2 | 149477218 | 0       | 0       | 0       |
| YRI | HIST2 | 149482218 | 0       | 0       | 0       |
| YRI | HIST2 | 149487218 | 0       | 0       | 0       |
| YRI | HIST2 | 149492218 | 0       | 0       | 0       |
| YRI | HIST2 | 149497218 | 0       | 0       | 0       |
| YRI | HIST2 | 149502218 | 0       | 0       | 0       |
| YRI | HIST2 | 149507218 | 0.4018  | 0.5042  | -0.3218 |
| YRI | HIST2 | 149512218 | 0.6674  | 2.0167  | -1.6133 |
| YRI | HIST2 | 149517218 | 0.4991  | 2.0167  | -1.8145 |
| YRI | HIST2 | 149522218 | 0.2335  | 0.5042  | -0.8507 |
| YRI | HIST2 | 149527218 | 0.073   | 0.3361  | -1.0562 |
| YRI | HIST2 | 149532218 | 0.2339  | 0.5042  | -0.8495 |
| YRI | HIST2 | 149537218 | 0.1609  | 0.1681  | -0.0428 |
| YRI | HIST2 | 149542218 | 0       | 0       | 0       |
| YRI | HIST2 | 149547218 | 0       | 0       | 0       |
| YRI | HIST2 | 149552218 | 0       | 0       | 0       |
| YRI | HIST2 | 149557218 | 0       | 0       | 0       |
| YRI | HIST2 | 149562218 | 0       | 0       | 0       |
| YRI | HIST2 | 149567218 | 0.5133  | 0.5042  | 0.0286  |
| YRI | HIST2 | 149572218 | 1.1098  | 1.6806  | -0.7853 |
| YRI | HIST2 | 149577218 | 0.5965  | 1.1764  | -1.0372 |
| YRI | HIST2 | 149582218 | 2.3949  | 5.0419  | -1.4748 |
| YRI | HIST2 | 149587218 | 2.8328  | 6.0502  | -1.5244 |
| YRI | HIST2 | 149592218 | 0.7683  | 1.8487  | -1.3819 |
| YRI | HIST2 | 149597218 | 2.5434  | 3.0251  | -0.4155 |
| YRI | HIST2 | 149602218 | 6.0536  | 6.5544  | -0.2208 |
| YRI | HIST2 | 149607218 | 5.8919  | 6.8906  | -0.4208 |
| YRI | HIST2 | 149612218 | 2.6056  | 3.6974  | -0.7958 |
| YRI | HIST2 | 149617218 | 0.5543  | 1.1764  | -1.1127 |
| YRI | HIST2 | 149622218 | 0       | 0       | 0       |
| YRI | HIST2 | 149627218 | 0.0093  | 0.1681  | -0.944  |
| YRI | HIST2 | 149632218 | 0.2214  | 0.3361  | -0.4605 |
| YRI | HIST2 | 149637218 | 3.1146  | 2.0167  | 1.3127  |
| YRI | HIST2 | 149642218 | 4.1004  | 4.2016  | -0.0661 |
| YRI | HIST2 | 149647218 | 8.5605  | 9.0754  | -0.1686 |
| YRI | HIST2 | 149652218 | 9.903   | 11.0921 | -0.3228 |
| YRI | HIST2 | 149657218 | 5.7555  | 7.5628  | -0.6997 |
| YRI | HIST2 | 149662218 | 7.8571  | 8.067   | -0.0766 |
| YRI | HIST2 | 149667218 | 10.8331 | 12.9408 | -0.4949 |
| YRI | HIST2 | 149672218 | 10.1832 | 14.1172 | -0.8506 |
| YRI | HIST2 | 149677218 | 6.2483  | 10.0837 | -1.1384 |
| YRI | HIST2 | 149682218 | 4.4674  | 8.9073  | -1.4787 |
| YRI | HIST2 | 149687218 | 3.0618  | 8.5712  | -1.9013 |
| YRI | HIST2 | 149692218 | 3.0228  | 6.7225  | -1.5942 |
| YRI | HIST2 | 149697218 | 4.7415  | 7.0586  | -0.9552 |
| YRI | HIST2 | 149702218 | 7.7985  | 10.756  | -0.8265 |
| YRI | HIST2 | 149707218 | 9.61    | 13.445  | -0.8685 |
| YRI | HIST2 | 149712218 | 7.4347  | 11.2602 | -1.0241 |

## 2\_TajimasD\_data

|     |       |           |        |         |         |
|-----|-------|-----------|--------|---------|---------|
| YRI | HIST2 | 149717218 | 8.0637 | 11.2602 | -0.8557 |
| YRI | HIST2 | 149722218 | 9.2788 | 12.9408 | -0.8599 |
| YRI | HIST2 | 149727218 | 8.8999 | 13.1089 | -0.9763 |
| YRI | HIST2 | 149732218 | 7.7159 | 12.4366 | -1.1509 |
| YRI | HIST2 | 149737218 | 4.4014 | 8.235   | -1.3726 |
| YRI | HIST2 | 149742218 | 3.6835 | 6.0502  | -1.1214 |
| YRI | HIST2 | 149747218 | 6.839  | 7.3947  | -0.2196 |
| YRI | HIST2 | 149752218 | 6.6334 | 7.7309  | -0.4164 |
| YRI | HIST2 | 149757218 | 6.2109 | 9.9157  | -1.117  |
| YRI | HIST2 | 149762218 | 6.0842 | 10.756  | -1.3055 |
| YRI | HIST2 | 149767218 | 3.4367 | 8.9073  | -1.822  |
| YRI | HIST2 | 149772218 | 5.4209 | 10.756  | -1.4909 |
| YRI | HIST2 | 149777218 | 6.534  | 12.2685 | -1.4161 |
| YRI | HIST2 | 149782218 | 4.9148 | 13.445  | -1.9318 |
| YRI | HIST2 | 149787218 | 4.2145 | 11.9324 | -1.9565 |
| YRI | HIST2 | 149792218 | 2.222  | 5.378   | -1.6609 |
| YRI | HIST2 | 149797218 | 0.4072 | 1.0084  | -1.1986 |
| YRI | HIST2 | 149802218 | 0      | 0       | 0       |
| YRI | HIST2 | 149807218 | 0      | 0       | 0       |
| YRI | HIST2 | 149812218 | 2.4624 | 3.6974  | -0.9002 |
| YRI | HIST2 | 149817218 | 4.7635 | 8.4031  | -1.2792 |
| YRI | HIST2 | 149822218 | 3.0742 | 5.0419  | -1.0963 |
| YRI | HIST2 | 149827218 | 0.7731 | 0.3361  | 1.7544  |
| YRI | HIST2 | 149832218 | 0      | 0       | 0       |
| YRI | HIST2 | 149837218 | 0      | 0       | 0       |
| YRI | HIST2 | 149842218 | 0.7311 | 2.0167  | -1.5371 |
| YRI | HIST2 | 149847218 | 3.9361 | 9.4115  | -1.7329 |
| YRI | HIST2 | 149852218 | 5.8281 | 14.2853 | -1.8082 |
| YRI | HIST2 | 149857218 | 4.2471 | 11.5963 | -1.9138 |
| YRI | HIST2 | 149862218 | 4.8498 | 11.4282 | -1.7367 |
| YRI | HIST2 | 149867218 | 7.6956 | 12.9408 | -1.2317 |
| YRI | HIST2 | 149872218 | 6.6281 | 11.2602 | -1.24   |
| YRI | HIST2 | 149877218 | 6.9578 | 11.2602 | -1.1518 |
| YRI | HIST2 | 149882218 | 7.7874 | 11.4282 | -0.9612 |
| YRI | HIST2 | 149887218 | 5.8326 | 11.9324 | -1.5463 |
| YRI | HIST2 | 149892218 | 5.6857 | 12.6047 | -1.6656 |
| YRI | HIST2 | 149897218 | 4.555  | 12.7727 | -1.9536 |
| YRI | HIST2 | 149902218 | 3.9827 | 12.1005 | -2.0309 |
| YRI | HIST2 | 149907218 | 6.6628 | 11.5963 | -1.2847 |
| YRI | HIST2 | 149912218 | 6.3571 | 11.7644 | -1.3892 |
| YRI | HIST2 | 149917218 | 5.032  | 11.9324 | -1.7492 |
| YRI | HIST2 | 149922218 | 7.461  | 14.2853 | -1.4591 |
| YRI | HIST2 | 149927218 | 9.1921 | 14.2853 | -1.089  |
| YRI | HIST2 | 149932218 | 9.6005 | 13.445  | -0.8707 |
| YRI | HIST2 | 149937218 | 8.8322 | 12.2685 | -0.8486 |
| YRI | HIST2 | 149942218 | 5.9889 | 9.2434  | -1.0474 |
| YRI | HIST2 | 149947218 | 4.8024 | 8.7392  | -1.3345 |
| YRI | HIST2 | 149952218 | 7.4519 | 10.756  | -0.9233 |
| YRI | HIST2 | 149957218 | 7.465  | 11.0921 | -0.9848 |

## 2\_TajimasD\_data

|     |       |           |         |         |         |
|-----|-------|-----------|---------|---------|---------|
| YRI | HIST2 | 149962218 | 4.9213  | 9.4115  | -1.4211 |
| YRI | HIST2 | 149967218 | 5.8211  | 9.4115  | -1.1363 |
| YRI | HIST2 | 149972218 | 6.3678  | 9.0754  | -0.8863 |
| YRI | HIST2 | 149977218 | 7.4583  | 9.9157  | -0.7409 |
| YRI | HIST2 | 149982218 | 8.5253  | 11.5963 | -0.7997 |
| YRI | HIST2 | 149987218 | 9.3239  | 11.4282 | -0.5555 |
| YRI | HIST2 | 149992218 | 10.1035 | 14.2853 | -0.8941 |
| YRI | HIST2 | 149997218 | 13.2451 | 15.9659 | -0.5232 |
| YRI | HIST2 | 150002218 | 13.9151 | 13.9492 | -0.0075 |
| YRI | HIST2 | 150007218 | 12.0523 | 15.6298 | -0.7021 |
| YRI | HIST2 | 150012218 | 14.9534 | 17.3104 | -0.4195 |
| YRI | HIST2 | 150017218 | 15.5687 | 15.4617 | 0.0212  |
| YRI | HIST2 | 150022218 | 13.236  | 14.9575 | -0.3523 |
| YRI | HIST2 | 150027218 | 11.4588 | 13.9492 | -0.5447 |
| YRI | HIST2 | 150032218 | 8.7145  | 11.2602 | -0.6815 |
| YRI | HIST2 | 150037218 | 8.8002  | 13.1089 | -0.9995 |
| YRI | HIST2 | 150042218 | 12.0729 | 15.1256 | -0.6181 |
| YRI | HIST2 | 150047218 | 11.473  | 14.2853 | -0.6013 |
| YRI | HIST2 | 150052218 | 8.4284  | 13.445  | -1.1361 |
| YRI | HIST2 | 150057218 | 7.1816  | 12.7727 | -1.3292 |
| YRI | HIST2 | 150062218 | 8.6603  | 12.7727 | -0.9777 |
| YRI | HIST2 | 150067218 | 8.7662  | 12.1005 | -0.8342 |
| YRI | HIST2 | 150072218 | 9.9093  | 14.1172 | -0.9099 |
| YRI | HIST2 | 150077218 | 12.0361 | 17.1423 | -0.9174 |
| YRI | HIST2 | 150082218 | 10.1377 | 15.1256 | -1.01   |
| YRI | HIST2 | 150087218 | 12.4534 | 15.2937 | -0.5691 |
| YRI | HIST2 | 150092218 | 14.7377 | 15.4617 | -0.1436 |
| YRI | HIST2 | 150097218 | 11.7857 | 14.2853 | -0.5344 |
| YRI | HIST2 | 150102218 | 11.6516 | 15.6298 | -0.7808 |
| YRI | HIST2 | 150107218 | 12.0909 | 16.6382 | -0.8407 |
| YRI | HIST2 | 150112218 | 9.5465  | 14.9575 | -1.1074 |
| YRI | HIST2 | 150117218 | 7.3261  | 13.1089 | -1.3414 |
| YRI | HIST2 | 150122218 | 8.5138  | 15.2937 | -1.3585 |
| YRI | HIST2 | 150127218 | 9.5921  | 14.6214 | -1.0518 |
| YRI | HIST2 | 150132218 | 11.0011 | 15.6298 | -0.9084 |
| YRI | HIST2 | 150137218 | 13.477  | 18.4868 | -0.8372 |
| YRI | HIST2 | 150142218 | 11.3877 | 15.6298 | -0.8325 |
| YRI | HIST2 | 150147218 | 7.6196  | 12.1005 | -1.121  |
| YRI | HIST2 | 150152218 | 10.3245 | 13.9492 | -0.7927 |
| YRI | HIST2 | 150157218 | 16.6305 | 18.6549 | -0.3354 |
| YRI | HIST2 | 150162218 | 16.1314 | 18.1507 | -0.3435 |
| YRI | HIST2 | 150167218 | 13.6272 | 16.302  | -0.5043 |
| YRI | HIST2 | 150172218 | 12.0446 | 16.134  | -0.7786 |
| YRI | HIST2 | 150177218 | 11.8676 | 15.6298 | -0.7384 |
| YRI | HIST2 | 150182218 | 12.1707 | 14.4534 | -0.4827 |
| YRI | HIST2 | 150187218 | 9.2495  | 11.7644 | -0.6461 |
| YRI | HIST2 | 150192218 | 9.3765  | 11.4282 | -0.5417 |
| YRI | HIST2 | 150197218 | 10.2786 | 10.924  | -0.1778 |
| YRI | HIST2 | 150202218 | 11.0233 | 10.756  | 0.0747  |

## 2\_TajimasD\_data

|     |       |           |         |         |         |
|-----|-------|-----------|---------|---------|---------|
| YRI | HIST2 | 150207218 | 13.2454 | 13.9492 | -0.1539 |
| YRI | HIST2 | 150212218 | 12.7696 | 14.6214 | -0.3873 |
| YRI | HIST2 | 150217218 | 12.0709 | 12.9408 | -0.2043 |
| YRI | HIST2 | 150222218 | 9.3845  | 10.4199 | -0.2981 |
| YRI | HIST2 | 150227218 | 4.6446  | 8.9073  | -1.4197 |
| YRI | HIST2 | 150232218 | 3.8797  | 8.235   | -1.5594 |
| YRI | HIST2 | 150237218 | 3.5922  | 6.3864  | -1.2611 |
| YRI | HIST2 | 150242218 | 4.4458  | 8.7392  | -1.4553 |
| YRI | HIST2 | 150247218 | 5.7601  | 10.924  | -1.4222 |
| YRI | HIST2 | 150252218 | 6.3576  | 10.4199 | -1.1694 |
| YRI | HIST2 | 150257218 | 9.4516  | 10.5879 | -0.3222 |
| YRI | HIST2 | 150262218 | 15.0424 | 12.9408 | 0.4935  |
| YRI | HIST2 | 150267218 | 19.3435 | 16.9743 | 0.4297  |
| YRI | HIST2 | 150272218 | 16.2061 | 16.8062 | -0.1099 |
| YRI | HIST2 | 150277218 | 13.7827 | 15.1256 | -0.2719 |
| YRI | HIST2 | 150282218 | 13.4605 | 14.7895 | -0.2749 |
| YRI | HIST2 | 150287218 | 10.3363 | 12.9408 | -0.6116 |
| YRI | HIST2 | 150292218 | 9.4936  | 11.7644 | -0.5834 |
| YRI | HIST2 | 150297218 | 10.2339 | 12.1005 | -0.467  |
| YRI | HIST2 | 150302218 | 11.0884 | 12.4366 | -0.3287 |
| YRI | HIST2 | 150307218 | 12.8151 | 14.6214 | -0.3778 |
| YRI | HIST2 | 150312218 | 12.6707 | 13.445  | -0.1754 |
| YRI | HIST2 | 150317218 | 13.9021 | 13.2769 | 0.1433  |
| YRI | HIST2 | 150322218 | 13.6148 | 14.9575 | -0.2748 |
| YRI | HIST2 | 150327218 | 12.9435 | 14.7895 | -0.3819 |
| YRI | HIST2 | 150332218 | 12.5213 | 14.2853 | -0.3772 |
| YRI | HIST2 | 150337218 | 10.7833 | 12.6047 | -0.4385 |
| CEU | HIST2 | 149356061 | 6.4378  | 6.3108  | 0.0583  |
| CEU | HIST2 | 149361061 | 4.798   | 5.6286  | -0.4225 |
| CEU | HIST2 | 149366061 | 3.5523  | 4.0935  | -0.3639 |
| CEU | HIST2 | 149371061 | 3.4556  | 3.9229  | -0.3259 |
| CEU | HIST2 | 149376061 | 4.8237  | 5.7991  | -0.4831 |
| CEU | HIST2 | 149381061 | 3.7631  | 4.4346  | -0.4213 |
| CEU | HIST2 | 149386061 | 4.9029  | 4.0935  | 0.5443  |
| CEU | HIST2 | 149391061 | 7.1274  | 5.9697  | 0.5587  |
| CEU | HIST2 | 149396061 | 3.6256  | 4.9463  | -0.7532 |
| CEU | HIST2 | 149401061 | 5.7411  | 6.3108  | -0.2616 |
| CEU | HIST2 | 149406061 | 6.5902  | 5.6286  | 0.4891  |
| CEU | HIST2 | 149411061 | 3.8971  | 3.2407  | 0.5382  |
| CEU | HIST2 | 149416061 | 3.8042  | 3.2407  | 0.4621  |
| CEU | HIST2 | 149421061 | 2.5547  | 2.0467  | 0.6045  |
| CEU | HIST2 | 149426061 | 2.8027  | 2.8996  | -0.0871 |
| CEU | HIST2 | 149431061 | 2.3717  | 2.8996  | -0.4748 |
| CEU | HIST2 | 149436061 | 0.8654  | 0.8528  | 0.0284  |
| CEU | HIST2 | 149441061 | 0       | 0       | 0       |
| CEU | HIST2 | 149446061 | 0.08    | 0.5117  | -1.3539 |
| CEU | HIST2 | 149451061 | 0.1394  | 0.8528  | -1.6066 |
| CEU | HIST2 | 149456061 | 0.128   | 0.6822  | -1.4472 |
| CEU | HIST2 | 149461061 | 0.0686  | 0.3411  | -1.0924 |

## 2\_TajimasD\_data

|     |       |           |        |        |         |
|-----|-------|-----------|--------|--------|---------|
| CEU | HIST2 | 149466061 | 0      | 0      | 0       |
| CEU | HIST2 | 149471061 | 0      | 0      | 0       |
| CEU | HIST2 | 149476061 | 0      | 0      | 0       |
| CEU | HIST2 | 149481061 | 0      | 0      | 0       |
| CEU | HIST2 | 149486061 | 0      | 0      | 0       |
| CEU | HIST2 | 149491061 | 0      | 0      | 0       |
| CEU | HIST2 | 149496061 | 0      | 0      | 0       |
| CEU | HIST2 | 149501061 | 0      | 0      | 0       |
| CEU | HIST2 | 149506061 | 0.1161 | 0.3411 | -0.902  |
| CEU | HIST2 | 149511061 | 0.4605 | 1.1939 | -1.3069 |
| CEU | HIST2 | 149516061 | 0.3445 | 0.8528 | -1.1447 |
| CEU | HIST2 | 149521061 | 0      | 0      | 0       |
| CEU | HIST2 | 149526061 | 0      | 0      | 0       |
| CEU | HIST2 | 149531061 | 0.0101 | 0.1706 | -0.9534 |
| CEU | HIST2 | 149536061 | 0.0101 | 0.1706 | -0.9534 |
| CEU | HIST2 | 149541061 | 0      | 0      | 0       |
| CEU | HIST2 | 149546061 | 0      | 0      | 0       |
| CEU | HIST2 | 149551061 | 0      | 0      | 0       |
| CEU | HIST2 | 149556061 | 0      | 0      | 0       |
| CEU | HIST2 | 149561061 | 0      | 0      | 0       |
| CEU | HIST2 | 149566061 | 0      | 0      | 0       |
| CEU | HIST2 | 149571061 | 0.6005 | 0.3411 | 1.0399  |
| CEU | HIST2 | 149576061 | 0.885  | 0.6822 | 0.5296  |
| CEU | HIST2 | 149581061 | 2.6434 | 3.0701 | -0.366  |
| CEU | HIST2 | 149586061 | 3.8    | 3.7524 | 0.0345  |
| CEU | HIST2 | 149591061 | 2.1948 | 1.8762 | 0.4056  |
| CEU | HIST2 | 149596061 | 2.012  | 2.729  | -0.6777 |
| CEU | HIST2 | 149601061 | 4.7794 | 4.2641 | 0.3345  |
| CEU | HIST2 | 149606061 | 7.0796 | 4.2641 | 1.8277  |
| CEU | HIST2 | 149611061 | 5.2857 | 3.0701 | 1.9005  |
| CEU | HIST2 | 149616061 | 1.7273 | 1.1939 | 0.9505  |
| CEU | HIST2 | 149621061 | 0      | 0      | 0       |
| CEU | HIST2 | 149626061 | 0      | 0      | 0       |
| CEU | HIST2 | 149631061 | 0.0301 | 0.1706 | -0.8346 |
| CEU | HIST2 | 149636061 | 1.5059 | 1.3645 | 0.2288  |
| CEU | HIST2 | 149641061 | 2.9559 | 2.2173 | 0.8252  |
| CEU | HIST2 | 149646061 | 5.7737 | 5.458  | 0.165   |
| CEU | HIST2 | 149651061 | 8.0025 | 7.1636 | 0.3434  |
| CEU | HIST2 | 149656061 | 6.69   | 4.6052 | 1.2658  |
| CEU | HIST2 | 149661061 | 6.1608 | 5.9697 | 0.0922  |
| CEU | HIST2 | 149666061 | 5.0033 | 8.6987 | -1.266  |
| CEU | HIST2 | 149671061 | 5.1422 | 8.6987 | -1.2184 |
| CEU | HIST2 | 149676061 | 5.8806 | 7.3342 | -0.5824 |
| CEU | HIST2 | 149681061 | 2.8672 | 5.458  | -1.3544 |
| CEU | HIST2 | 149686061 | 0.9979 | 3.5818 | -1.9475 |
| CEU | HIST2 | 149691061 | 1.3179 | 3.2407 | -1.5767 |
| CEU | HIST2 | 149696061 | 2.7873 | 4.9463 | -1.2313 |
| CEU | HIST2 | 149701061 | 4.4286 | 6.1402 | -0.8054 |
| CEU | HIST2 | 149706061 | 6.7262 | 6.9931 | -0.1117 |



## 2\_TajimasD\_data

|     |       |           |        |        |         |
|-----|-------|-----------|--------|--------|---------|
| CEU | HIST2 | 149711061 | 7.6835 | 7.3342 | 0.14    |
| CEU | HIST2 | 149716061 | 9.9725 | 8.3576 | 0.574   |
| CEU | HIST2 | 149721061 | 11.173 | 7.8459 | 1.2534  |
| CEU | HIST2 | 149726061 | 6.8407 | 6.1402 | 0.3296  |
| CEU | HIST2 | 149731061 | 5.3667 | 5.6286 | -0.1332 |
| CEU | HIST2 | 149736061 | 5.0111 | 4.7757 | 0.1384  |
| CEU | HIST2 | 149741061 | 2.9128 | 3.4112 | -0.3915 |
| CEU | HIST2 | 149746061 | 4.6015 | 3.5818 | 0.7685  |
| CEU | HIST2 | 149751061 | 3.9283 | 3.7524 | 0.1274  |
| CEU | HIST2 | 149756061 | 1.7943 | 3.4112 | -1.2699 |
| CEU | HIST2 | 149761061 | 2.4993 | 5.2874 | -1.4992 |
| CEU | HIST2 | 149766061 | 1.2942 | 4.6052 | -2.0103 |
| CEU | HIST2 | 149771061 | 2.9518 | 4.7757 | -1.0727 |
| CEU | HIST2 | 149776061 | 5.2746 | 7.1636 | -0.7733 |
| CEU | HIST2 | 149781061 | 5.0462 | 8.0164 | -1.0971 |
| CEU | HIST2 | 149786061 | 4.0701 | 7.1636 | -1.2663 |
| CEU | HIST2 | 149791061 | 2.1408 | 3.9229 | -1.243  |
| CEU | HIST2 | 149796061 | 0.3836 | 0.8528 | -1.0566 |
| CEU | HIST2 | 149801061 | 0      | 0      | 0       |
| CEU | HIST2 | 149806061 | 0      | 0      | 0       |
| CEU | HIST2 | 149811061 | 1.1563 | 1.3645 | -0.3368 |
| CEU | HIST2 | 149816061 | 2.503  | 3.5818 | -0.8131 |
| CEU | HIST2 | 149821061 | 2.0501 | 3.0701 | -0.8749 |
| CEU | HIST2 | 149826061 | 0.7034 | 0.8528 | -0.3364 |
| CEU | HIST2 | 149831061 | 0      | 0      | 0       |
| CEU | HIST2 | 149836061 | 0      | 0      | 0       |
| CEU | HIST2 | 149841061 | 0.3923 | 0.5117 | -0.3745 |
| CEU | HIST2 | 149846061 | 1.9915 | 3.5818 | -1.1986 |
| CEU | HIST2 | 149851061 | 2.4545 | 5.458  | -1.5702 |
| CEU | HIST2 | 149856061 | 1.6761 | 5.1169 | -1.9045 |
| CEU | HIST2 | 149861061 | 3.5198 | 6.6519 | -1.3713 |
| CEU | HIST2 | 149866061 | 5.7144 | 9.2104 | -1.136  |
| CEU | HIST2 | 149871061 | 4.9204 | 8.3576 | -1.2218 |
| CEU | HIST2 | 149876061 | 3.5312 | 6.3108 | -1.2762 |
| CEU | HIST2 | 149881061 | 3.1727 | 5.6286 | -1.2492 |
| CEU | HIST2 | 149886061 | 2.5168 | 3.9229 | -0.9807 |
| CEU | HIST2 | 149891061 | 3.0138 | 3.9229 | -0.6341 |
| CEU | HIST2 | 149896061 | 4.1303 | 6.3108 | -1.0011 |
| CEU | HIST2 | 149901061 | 3.2051 | 5.7991 | -1.2848 |
| CEU | HIST2 | 149906061 | 3.491  | 4.9463 | -0.83   |
| CEU | HIST2 | 149911061 | 2.9746 | 4.7757 | -1.0593 |
| CEU | HIST2 | 149916061 | 1.6155 | 4.0935 | -1.6663 |
| CEU | HIST2 | 149921061 | 3.0489 | 5.1169 | -1.1447 |
| CEU | HIST2 | 149926061 | 4.3426 | 5.2874 | -0.508  |
| CEU | HIST2 | 149931061 | 3.2531 | 5.6286 | -1.2083 |
| CEU | HIST2 | 149936061 | 2.1371 | 5.458  | -1.7361 |
| CEU | HIST2 | 149941061 | 2.3709 | 3.9229 | -1.0825 |
| CEU | HIST2 | 149946061 | 2.1497 | 3.7524 | -1.1611 |
| CEU | HIST2 | 149951061 | 2.7442 | 5.7991 | -1.5131 |

## 2\_TajimasD\_data

|     |       |           |         |         |         |
|-----|-------|-----------|---------|---------|---------|
| CEU | HIST2 | 149956061 | 2.4113  | 4.7757  | -1.3906 |
| CEU | HIST2 | 149961061 | 1.2548  | 2.729   | -1.3934 |
| CEU | HIST2 | 149966061 | 1.5325  | 3.0701  | -1.3189 |
| CEU | HIST2 | 149971061 | 2.5065  | 4.0935  | -1.0671 |
| CEU | HIST2 | 149976061 | 2.4527  | 4.2641  | -1.1759 |
| CEU | HIST2 | 149981061 | 2.3082  | 4.4346  | -1.3342 |
| CEU | HIST2 | 149986061 | 3.2799  | 5.458   | -1.1387 |
| CEU | HIST2 | 149991061 | 5.7891  | 6.8225  | -0.4422 |
| CEU | HIST2 | 149996061 | 8.1765  | 8.3576  | -0.0644 |
| CEU | HIST2 | 150001061 | 8.9544  | 7.8459  | 0.4176  |
| CEU | HIST2 | 150006061 | 7.8714  | 6.6519  | 0.5339  |
| CEU | HIST2 | 150011061 | 10.4032 | 9.2104  | 0.3876  |
| CEU | HIST2 | 150016061 | 12.0101 | 10.2337 | 0.5233  |
| CEU | HIST2 | 150021061 | 8.2729  | 7.1636  | 0.4541  |
| CEU | HIST2 | 150026061 | 5.6425  | 5.7991  | -0.0776 |
| CEU | HIST2 | 150031061 | 3.1717  | 5.2874  | -1.1376 |
| CEU | HIST2 | 150036061 | 2.6553  | 5.1169  | -1.3625 |
| CEU | HIST2 | 150041061 | 3.57    | 5.6286  | -1.0471 |
| CEU | HIST2 | 150046061 | 5.4927  | 6.9931  | -0.6278 |
| CEU | HIST2 | 150051061 | 3.9221  | 5.2874  | -0.7341 |
| CEU | HIST2 | 150056061 | 2.1027  | 3.9229  | -1.2695 |
| CEU | HIST2 | 150061061 | 3.0258  | 5.1169  | -1.1575 |
| CEU | HIST2 | 150066061 | 1.9971  | 3.7524  | -1.2717 |
| CEU | HIST2 | 150071061 | 4.2546  | 4.4346  | -0.1129 |
| CEU | HIST2 | 150076061 | 6.9598  | 6.8225  | 0.0588  |
| CEU | HIST2 | 150081061 | 4.5764  | 6.3108  | -0.7963 |
| CEU | HIST2 | 150086061 | 3.5586  | 7.1636  | -1.4757 |
| CEU | HIST2 | 150091061 | 4.1697  | 6.6519  | -1.0868 |
| CEU | HIST2 | 150096061 | 3.659   | 4.9463  | -0.7341 |
| CEU | HIST2 | 150101061 | 3.7442  | 6.1402  | -1.1275 |
| CEU | HIST2 | 150106061 | 5.6516  | 6.6519  | -0.438  |
| CEU | HIST2 | 150111061 | 6.6848  | 6.4814  | 0.0912  |
| CEU | HIST2 | 150116061 | 4.2647  | 5.1169  | -0.4717 |
| CEU | HIST2 | 150121061 | 3.2517  | 5.6286  | -1.209  |
| CEU | HIST2 | 150126061 | 5.0276  | 7.8459  | -1.0617 |
| CEU | HIST2 | 150131061 | 6.5593  | 9.2104  | -0.8615 |
| CEU | HIST2 | 150136061 | 7.1653  | 11.2571 | -1.1026 |
| CEU | HIST2 | 150141061 | 5.9015  | 9.5515  | -1.1467 |
| CEU | HIST2 | 150146061 | 4.6846  | 6.9931  | -0.9659 |
| CEU | HIST2 | 150151061 | 3.8654  | 7.5047  | -1.4279 |
| CEU | HIST2 | 150156061 | 5.1734  | 8.6987  | -1.2077 |
| CEU | HIST2 | 150161061 | 7.3892  | 9.0398  | -0.5457 |
| CEU | HIST2 | 150166061 | 9.3344  | 8.0164  | 0.4868  |
| CEU | HIST2 | 150171061 | 9.1189  | 6.8225  | 0.9826  |
| CEU | HIST2 | 150176061 | 6.0761  | 5.7991  | 0.1372  |
| CEU | HIST2 | 150181061 | 7.5974  | 6.4814  | 0.5002  |
| CEU | HIST2 | 150186061 | 7.8027  | 6.6519  | 0.5038  |
| CEU | HIST2 | 150191061 | 6.0346  | 6.1402  | -0.0497 |
| CEU | HIST2 | 150196061 | 6.4914  | 6.1402  | 0.1653  |

## 2\_TajimasD\_data

|     |       |           |         |         |         |
|-----|-------|-----------|---------|---------|---------|
| CEU | HIST2 | 150201061 | 8.4232  | 6.6519  | 0.7755  |
| CEU | HIST2 | 150206061 | 9.0678  | 7.8459  | 0.4603  |
| CEU | HIST2 | 150211061 | 8.8654  | 7.5047  | 0.5339  |
| CEU | HIST2 | 150216061 | 8.5753  | 6.4814  | 0.9385  |
| CEU | HIST2 | 150221061 | 7.7838  | 6.4814  | 0.5838  |
| CEU | HIST2 | 150226061 | 5.0878  | 5.458   | -0.1935 |
| CEU | HIST2 | 150231061 | 2.3393  | 3.5818  | -0.9365 |
| CEU | HIST2 | 150236061 | 2.7955  | 2.5584  | 0.2362  |
| CEU | HIST2 | 150241061 | 3.0823  | 3.9229  | -0.5863 |
| CEU | HIST2 | 150246061 | 5.3715  | 5.9697  | -0.2887 |
| CEU | HIST2 | 150251061 | 5.7211  | 5.2874  | 0.2332  |
| CEU | HIST2 | 150256061 | 6.6999  | 6.1402  | 0.2634  |
| CEU | HIST2 | 150261061 | 13.6526 | 8.8692  | 1.6096  |
| CEU | HIST2 | 150266061 | 18.6572 | 10.2337 | 2.4816  |
| CEU | HIST2 | 150271061 | 15.7421 | 11.0866 | 1.2726  |
| CEU | HIST2 | 150276061 | 14.0435 | 11.2571 | 0.7508  |
| CEU | HIST2 | 150281061 | 17.242  | 11.5982 | 1.4787  |
| CEU | HIST2 | 150286061 | 13.7757 | 8.8692  | 1.651   |
| CEU | HIST2 | 150291061 | 9.316   | 6.4814  | 1.2705  |
| CEU | HIST2 | 150296061 | 9.3435  | 7.6753  | 0.6412  |
| CEU | HIST2 | 150301061 | 8.2621  | 7.6753  | 0.2255  |
| CEU | HIST2 | 150306061 | 8.7949  | 8.187   | 0.2202  |
| CEU | HIST2 | 150311061 | 10.416  | 9.2104  | 0.3918  |
| CEU | HIST2 | 150316061 | 12.4321 | 10.7454 | 0.4748  |
| CEU | HIST2 | 150321061 | 13.523  | 10.0632 | 1.0354  |
| CEU | HIST2 | 150326061 | 13.0498 | 8.8692  | 1.4068  |
| CEU | HIST2 | 150331061 | 12.7776 | 9.3809  | 1.0851  |
| CEU | HIST2 | 150336061 | 11.5536 | 9.3809  | 0.6941  |
| CEU | HIST2 | 150341061 | 9.3917  | 9.2104  | 0.0589  |
| CEU | HIST2 | 150346061 | 8.6794  | 8.0164  | 0.2449  |
| CHB | HIST2 | 149356061 | 5.3149  | 5.9295  | -0.2975 |
| CHB | HIST2 | 149361061 | 4.2311  | 3.8965  | 0.234   |
| CHB | HIST2 | 149366061 | 3.2501  | 3.8965  | -0.4521 |
| CHB | HIST2 | 149371061 | 2.7796  | 5.0825  | -1.2785 |
| CHB | HIST2 | 149376061 | 3.5393  | 5.5907  | -1.0467 |
| CHB | HIST2 | 149381061 | 2.9831  | 4.066   | -0.7302 |
| CHB | HIST2 | 149386061 | 3.7443  | 4.913   | -0.6685 |
| CHB | HIST2 | 149391061 | 5.4818  | 6.2684  | -0.3623 |
| CHB | HIST2 | 149396061 | 3.0779  | 4.913   | -1.0497 |
| CHB | HIST2 | 149401061 | 4.704   | 6.0989  | -0.6585 |
| CHB | HIST2 | 149406061 | 4.9303  | 5.7601  | -0.4123 |
| CHB | HIST2 | 149411061 | 3.5551  | 4.7436  | -0.7011 |
| CHB | HIST2 | 149416061 | 3.9871  | 4.066   | -0.0532 |
| CHB | HIST2 | 149421061 | 2.0497  | 3.0495  | -0.8598 |
| CHB | HIST2 | 149426061 | 1.9568  | 3.8965  | -1.3567 |
| CHB | HIST2 | 149431061 | 1.9248  | 3.5577  | -1.2341 |
| CHB | HIST2 | 149436061 | 0.7352  | 1.5247  | -1.1729 |
| CHB | HIST2 | 149441061 | 0       | 0       | 0       |
| CHB | HIST2 | 149446061 | 0.0386  | 0.5082  | -1.4741 |

## 2\_TajimasD\_data

|     |       |           |        |        |         |
|-----|-------|-----------|--------|--------|---------|
| CHB | HIST2 | 149451061 | 0.0871 | 1.1859 | -1.9613 |
| CHB | HIST2 | 149456061 | 0.0873 | 1.1859 | -1.961  |
| CHB | HIST2 | 149461061 | 0.0388 | 0.5082 | -1.4735 |
| CHB | HIST2 | 149466061 | 0      | 0      | 0       |
| CHB | HIST2 | 149471061 | 0      | 0      | 0       |
| CHB | HIST2 | 149476061 | 0      | 0      | 0       |
| CHB | HIST2 | 149481061 | 0      | 0      | 0       |
| CHB | HIST2 | 149486061 | 0      | 0      | 0       |
| CHB | HIST2 | 149491061 | 0      | 0      | 0       |
| CHB | HIST2 | 149496061 | 0      | 0      | 0       |
| CHB | HIST2 | 149501061 | 0      | 0      | 0       |
| CHB | HIST2 | 149506061 | 0.3379 | 0.3388 | -0.0036 |
| CHB | HIST2 | 149511061 | 0.8968 | 1.0165 | -0.2382 |
| CHB | HIST2 | 149516061 | 0.5686 | 0.8471 | -0.628  |
| CHB | HIST2 | 149521061 | 0.0097 | 0.1694 | -0.949  |
| CHB | HIST2 | 149526061 | 0      | 0      | 0       |
| CHB | HIST2 | 149531061 | 0.2578 | 0.1694 | 0.5253  |
| CHB | HIST2 | 149536061 | 0.2578 | 0.1694 | 0.5253  |
| CHB | HIST2 | 149541061 | 0      | 0      | 0       |
| CHB | HIST2 | 149546061 | 0      | 0      | 0       |
| CHB | HIST2 | 149551061 | 0      | 0      | 0       |
| CHB | HIST2 | 149556061 | 0      | 0      | 0       |
| CHB | HIST2 | 149561061 | 0      | 0      | 0       |
| CHB | HIST2 | 149566061 | 0.0097 | 0.1694 | -0.949  |
| CHB | HIST2 | 149571061 | 0.4891 | 0.5082 | -0.06   |
| CHB | HIST2 | 149576061 | 0.9039 | 0.8471 | 0.1281  |
| CHB | HIST2 | 149581061 | 3.1039 | 3.3883 | -0.224  |
| CHB | HIST2 | 149586061 | 4.0702 | 3.8965 | 0.1215  |
| CHB | HIST2 | 149591061 | 1.8397 | 1.5247 | 0.468   |
| CHB | HIST2 | 149596061 | 2.4835 | 2.033  | 0.5372  |
| CHB | HIST2 | 149601061 | 6.0246 | 3.7271 | 1.6691  |
| CHB | HIST2 | 149606061 | 6.6937 | 4.913  | 1.0186  |
| CHB | HIST2 | 149611061 | 4.095  | 3.8965 | 0.1388  |
| CHB | HIST2 | 149616061 | 1.3912 | 1.1859 | 0.3665  |
| CHB | HIST2 | 149621061 | 0      | 0      | 0       |
| CHB | HIST2 | 149626061 | 0      | 0      | 0       |
| CHB | HIST2 | 149631061 | 0.0097 | 0.1694 | -0.949  |
| CHB | HIST2 | 149636061 | 1.9596 | 1.3553 | 0.9794  |
| CHB | HIST2 | 149641061 | 3.5026 | 2.7106 | 0.7505  |
| CHB | HIST2 | 149646061 | 5.9046 | 5.5907 | 0.1602  |
| CHB | HIST2 | 149651061 | 7.735  | 6.6072 | 0.4953  |
| CHB | HIST2 | 149656061 | 5.4565 | 5.5907 | -0.0685 |
| CHB | HIST2 | 149661061 | 5.3882 | 5.2519 | 0.0735  |
| CHB | HIST2 | 149666061 | 7.7929 | 5.7601 | 1.0099  |
| CHB | HIST2 | 149671061 | 8.0493 | 8.1319 | -0.03   |
| CHB | HIST2 | 149676061 | 6.1386 | 7.1154 | -0.4011 |
| CHB | HIST2 | 149681061 | 3.3585 | 5.0825 | -0.9571 |
| CHB | HIST2 | 149686061 | 2.0524 | 4.4048 | -1.4802 |
| CHB | HIST2 | 149691061 | 2.8776 | 4.2354 | -0.8839 |

## 2\_TajimasD\_data

|     |       |           |        |         |         |
|-----|-------|-----------|--------|---------|---------|
| CHB | HIST2 | 149696061 | 4.4445 | 4.5742  | -0.079  |
| CHB | HIST2 | 149701061 | 5.503  | 6.0989  | -0.2813 |
| CHB | HIST2 | 149706061 | 6.799  | 6.7766  | 0.0096  |
| CHB | HIST2 | 149711061 | 6.55   | 5.9295  | 0.3004  |
| CHB | HIST2 | 149716061 | 7.762  | 8.3013  | -0.1923 |
| CHB | HIST2 | 149721061 | 8.7421 | 9.8261  | -0.3307 |
| CHB | HIST2 | 149726061 | 5.8646 | 8.4708  | -0.9124 |
| CHB | HIST2 | 149731061 | 5.2065 | 6.7766  | -0.674  |
| CHB | HIST2 | 149736061 | 4.4731 | 5.5907  | -0.5702 |
| CHB | HIST2 | 149741061 | 2.0879 | 3.5577  | -1.1108 |
| CHB | HIST2 | 149746061 | 3.8763 | 3.0495  | 0.7111  |
| CHB | HIST2 | 149751061 | 3.7139 | 3.3883  | 0.2564  |
| CHB | HIST2 | 149756061 | 0.8115 | 4.2354  | -2.229  |
| CHB | HIST2 | 149761061 | 2.0857 | 6.7766  | -2.0136 |
| CHB | HIST2 | 149766061 | 1.6082 | 4.7436  | -1.8495 |
| CHB | HIST2 | 149771061 | 1.2717 | 4.913   | -2.0828 |
| CHB | HIST2 | 149776061 | 1.6794 | 5.9295  | -2.0575 |
| CHB | HIST2 | 149781061 | 1.0537 | 5.0825  | -2.2367 |
| CHB | HIST2 | 149786061 | 0.7438 | 5.5907  | -2.473  |
| CHB | HIST2 | 149791061 | 0.422  | 3.7271  | -2.4011 |
| CHB | HIST2 | 149796061 | 0.1902 | 1.1859  | -1.7773 |
| CHB | HIST2 | 149801061 | 0      | 0       | 0       |
| CHB | HIST2 | 149806061 | 0      | 0       | 0       |
| CHB | HIST2 | 149811061 | 0.4297 | 1.3553  | -1.5001 |
| CHB | HIST2 | 149816061 | 1.1502 | 4.066   | -1.9662 |
| CHB | HIST2 | 149821061 | 1.2125 | 4.2354  | -1.9679 |
| CHB | HIST2 | 149826061 | 0.4919 | 1.5247  | -1.5344 |
| CHB | HIST2 | 149831061 | 0      | 0       | 0       |
| CHB | HIST2 | 149836061 | 0      | 0       | 0       |
| CHB | HIST2 | 149841061 | 0.0289 | 0.3388  | -1.2431 |
| CHB | HIST2 | 149846061 | 0.5002 | 4.2354  | -2.4316 |
| CHB | HIST2 | 149851061 | 1.1179 | 7.9625  | -2.5364 |
| CHB | HIST2 | 149856061 | 1.0769 | 6.0989  | -2.3706 |
| CHB | HIST2 | 149861061 | 1.3091 | 5.4213  | -2.1563 |
| CHB | HIST2 | 149866061 | 1.5333 | 7.1154  | -2.2924 |
| CHB | HIST2 | 149871061 | 0.9307 | 6.6072  | -2.4932 |
| CHB | HIST2 | 149876061 | 1.3607 | 6.2684  | -2.2603 |
| CHB | HIST2 | 149881061 | 1.7582 | 7.2848  | -2.2215 |
| CHB | HIST2 | 149886061 | 1.1163 | 6.0989  | -2.352  |
| CHB | HIST2 | 149891061 | 1.6861 | 5.4213  | -1.9586 |
| CHB | HIST2 | 149896061 | 1.5823 | 7.6237  | -2.3297 |
| CHB | HIST2 | 149901061 | 1.0137 | 7.1154  | -2.5058 |
| CHB | HIST2 | 149906061 | 2.1499 | 7.1154  | -2.0392 |
| CHB | HIST2 | 149911061 | 2.1122 | 7.7931  | -2.1471 |
| CHB | HIST2 | 149916061 | 1.5108 | 6.2684  | -2.1912 |
| CHB | HIST2 | 149921061 | 2.7226 | 8.4708  | -2.0123 |
| CHB | HIST2 | 149926061 | 3.7428 | 10.5037 | -1.9383 |
| CHB | HIST2 | 149931061 | 2.8961 | 9.4872  | -2.0777 |
| CHB | HIST2 | 149936061 | 2.3324 | 10.3343 | -2.3292 |

## 2\_TajimasD\_data

|     |       |           |        |         |         |
|-----|-------|-----------|--------|---------|---------|
| CHB | HIST2 | 149941061 | 2.5686 | 8.8096  | -2.1071 |
| CHB | HIST2 | 149946061 | 2.2648 | 6.0989  | -1.8099 |
| CHB | HIST2 | 149951061 | 2.04   | 7.7931  | -2.1744 |
| CHB | HIST2 | 149956061 | 1.5597 | 7.9625  | -2.3727 |
| CHB | HIST2 | 149961061 | 1.34   | 6.0989  | -2.2464 |
| CHB | HIST2 | 149966061 | 1.0556 | 6.2684  | -2.4008 |
| CHB | HIST2 | 149971061 | 1.4213 | 5.9295  | -2.1825 |
| CHB | HIST2 | 149976061 | 1.9322 | 5.0825  | -1.749  |
| CHB | HIST2 | 149981061 | 1.4866 | 6.6072  | -2.249  |
| CHB | HIST2 | 149986061 | 2.2292 | 8.6402  | -2.2037 |
| CHB | HIST2 | 149991061 | 3.6107 | 9.4872  | -1.8524 |
| CHB | HIST2 | 149996061 | 6.1119 | 10.6731 | -1.2883 |
| CHB | HIST2 | 150001061 | 6.3588 | 11.5202 | -1.357  |
| CHB | HIST2 | 150006061 | 3.288  | 9.3178  | -1.9328 |
| CHB | HIST2 | 150011061 | 2.1883 | 10.1649 | -2.358  |
| CHB | HIST2 | 150016061 | 2.0415 | 10.3343 | -2.4139 |
| CHB | HIST2 | 150021061 | 1.6832 | 8.1319  | -2.3439 |
| CHB | HIST2 | 150026061 | 1.4738 | 8.3013  | -2.435  |
| CHB | HIST2 | 150031061 | 0.8212 | 6.6072  | -2.5413 |
| CHB | HIST2 | 150036061 | 1.189  | 5.9295  | -2.2949 |
| CHB | HIST2 | 150041061 | 2.1468 | 6.7766  | -1.9874 |
| CHB | HIST2 | 150046061 | 1.6223 | 7.9625  | -2.3495 |
| CHB | HIST2 | 150051061 | 1.0413 | 6.7766  | -2.462  |
| CHB | HIST2 | 150056061 | 1.0436 | 5.0825  | -2.2423 |
| CHB | HIST2 | 150061061 | 0.7992 | 5.5907  | -2.4447 |
| CHB | HIST2 | 150066061 | 0.6478 | 5.2519  | -2.4831 |
| CHB | HIST2 | 150071061 | 1.1749 | 6.7766  | -2.4046 |
| CHB | HIST2 | 150076061 | 1.3236 | 7.7931  | -2.4451 |
| CHB | HIST2 | 150081061 | 0.6806 | 5.5907  | -2.5052 |
| CHB | HIST2 | 150086061 | 1.3324 | 6.6072  | -2.3168 |
| CHB | HIST2 | 150091061 | 1.8993 | 6.946   | -2.1184 |
| CHB | HIST2 | 150096061 | 1.434  | 5.7601  | -2.1493 |
| CHB | HIST2 | 150101061 | 1.4005 | 7.1154  | -2.3469 |
| CHB | HIST2 | 150106061 | 1.8186 | 7.4543  | -2.2184 |
| CHB | HIST2 | 150111061 | 1.3842 | 7.1154  | -2.3536 |
| CHB | HIST2 | 150116061 | 1.0733 | 6.6072  | -2.4306 |
| CHB | HIST2 | 150121061 | 1.8549 | 7.4543  | -2.2041 |
| CHB | HIST2 | 150126061 | 2.5888 | 8.3013  | -2.0373 |
| CHB | HIST2 | 150131061 | 2.7722 | 8.3013  | -1.9719 |
| CHB | HIST2 | 150136061 | 2.3924 | 8.979   | -2.185  |
| CHB | HIST2 | 150141061 | 2.5599 | 9.4872  | -2.1836 |
| CHB | HIST2 | 150146061 | 2.533  | 8.4708  | -2.0787 |
| CHB | HIST2 | 150151061 | 2.0617 | 8.4708  | -2.2436 |
| CHB | HIST2 | 150156061 | 2.8397 | 11.8591 | -2.3076 |
| CHB | HIST2 | 150161061 | 5.0817 | 12.3673 | -1.7917 |
| CHB | HIST2 | 150166061 | 8.9528 | 11.012  | -0.5648 |
| CHB | HIST2 | 150171061 | 8.2659 | 9.8261  | -0.476  |
| CHB | HIST2 | 150176061 | 5.0807 | 9.8261  | -1.4478 |
| CHB | HIST2 | 150181061 | 6.3457 | 9.8261  | -1.0619 |

## 2\_TajimasD\_data

|     |       |           |         |         |         |
|-----|-------|-----------|---------|---------|---------|
| CHB | HIST2 | 150186061 | 6.0451  | 7.7931  | -0.6607 |
| CHB | HIST2 | 150191061 | 4.911   | 6.946   | -0.8542 |
| CHB | HIST2 | 150196061 | 6.4069  | 7.6237  | -0.4692 |
| CHB | HIST2 | 150201061 | 8.5789  | 9.8261  | -0.3805 |
| CHB | HIST2 | 150206061 | 8.8808  | 10.8426 | -0.546  |
| CHB | HIST2 | 150211061 | 8.2269  | 11.1814 | -0.7989 |
| CHB | HIST2 | 150216061 | 7.8818  | 10.5037 | -0.7517 |
| CHB | HIST2 | 150221061 | 6.8812  | 8.6402  | -0.6046 |
| CHB | HIST2 | 150226061 | 4.0803  | 7.4543  | -1.3281 |
| CHB | HIST2 | 150231061 | 2.0535  | 5.2519  | -1.725  |
| CHB | HIST2 | 150236061 | 2.7594  | 3.8965  | -0.7953 |
| CHB | HIST2 | 150241061 | 3.8989  | 5.2519  | -0.7297 |
| CHB | HIST2 | 150246061 | 5.4891  | 7.4543  | -0.7736 |
| CHB | HIST2 | 150251061 | 4.7921  | 7.7931  | -1.1342 |
| CHB | HIST2 | 150256061 | 5.2857  | 7.7931  | -0.9477 |
| CHB | HIST2 | 150261061 | 9.9897  | 9.8261  | 0.0499  |
| CHB | HIST2 | 150266061 | 13.6783 | 11.5202 | 0.5674  |
| CHB | HIST2 | 150271061 | 10.8496 | 10.3343 | 0.15    |
| CHB | HIST2 | 150276061 | 9.0219  | 10.3343 | -0.382  |
| CHB | HIST2 | 150281061 | 11.8653 | 13.5532 | -0.3807 |
| CHB | HIST2 | 150286061 | 9.9702  | 10.8426 | -0.2428 |
| CHB | HIST2 | 150291061 | 6.4022  | 8.3013  | -0.6773 |
| CHB | HIST2 | 150296061 | 6.148   | 9.3178  | -1.016  |
| CHB | HIST2 | 150301061 | 6.0429  | 8.4708  | -0.8499 |
| CHB | HIST2 | 150306061 | 6.7982  | 9.9955  | -0.9601 |
| CHB | HIST2 | 150311061 | 7.5165  | 9.3178  | -0.5774 |
| CHB | HIST2 | 150316061 | 7.8782  | 9.4872  | -0.5072 |
| CHB | HIST2 | 150321061 | 9.2692  | 10.8426 | -0.4379 |
| CHB | HIST2 | 150326061 | 9.7202  | 11.3508 | -0.4347 |
| CHB | HIST2 | 150331061 | 8.574   | 11.6896 | -0.808  |
| CHB | HIST2 | 150336061 | 7.2781  | 8.8096  | -0.5171 |
| CHB | HIST2 | 150341061 | 6.5481  | 6.7766  | -0.0981 |
| CHB | HIST2 | 150346061 | 5.9178  | 7.1154  | -0.4918 |
| YRI | HIST2 | 149356061 | 6.8644  | 7.3947  | -0.2096 |
| YRI | HIST2 | 149361061 | 5.0016  | 6.7225  | -0.7415 |
| YRI | HIST2 | 149366061 | 3.8247  | 7.3947  | -1.4107 |
| YRI | HIST2 | 149371061 | 3.2879  | 7.0586  | -1.5545 |
| YRI | HIST2 | 149376061 | 4.4699  | 7.8989  | -1.2757 |
| YRI | HIST2 | 149381061 | 3.7988  | 6.0502  | -1.0667 |
| YRI | HIST2 | 149386061 | 6.0587  | 5.378   | 0.3582  |
| YRI | HIST2 | 149391061 | 7.9415  | 7.5628  | 0.1466  |
| YRI | HIST2 | 149396061 | 4.6509  | 7.2267  | -1.0394 |
| YRI | HIST2 | 149401061 | 6.7805  | 8.9073  | -0.7083 |
| YRI | HIST2 | 149406061 | 7.3143  | 8.9073  | -0.5306 |
| YRI | HIST2 | 149411061 | 5.4248  | 8.067   | -0.9642 |
| YRI | HIST2 | 149416061 | 4.6725  | 5.7141  | -0.5194 |
| YRI | HIST2 | 149421061 | 3.4411  | 3.0251  | 0.3589  |
| YRI | HIST2 | 149426061 | 3.4213  | 4.3696  | -0.5988 |
| YRI | HIST2 | 149431061 | 2.5589  | 3.8654  | -0.9168 |

## 2\_TajimasD\_data

|     |       |           |         |         |         |
|-----|-------|-----------|---------|---------|---------|
| YRI | HIST2 | 149436061 | 1.1608  | 1.5126  | -0.5238 |
| YRI | HIST2 | 149441061 | 0.0278  | 0.3361  | -1.2377 |
| YRI | HIST2 | 149446061 | 0.1568  | 0.5042  | -1.0918 |
| YRI | HIST2 | 149451061 | 0.4181  | 1.1764  | -1.3563 |
| YRI | HIST2 | 149456061 | 0.5682  | 1.5126  | -1.4063 |
| YRI | HIST2 | 149461061 | 0.3069  | 0.8403  | -1.2048 |
| YRI | HIST2 | 149466061 | 0       | 0       | 0       |
| YRI | HIST2 | 149471061 | 0       | 0       | 0       |
| YRI | HIST2 | 149476061 | 0       | 0       | 0       |
| YRI | HIST2 | 149481061 | 0       | 0       | 0       |
| YRI | HIST2 | 149486061 | 0       | 0       | 0       |
| YRI | HIST2 | 149491061 | 0       | 0       | 0       |
| YRI | HIST2 | 149496061 | 0       | 0       | 0       |
| YRI | HIST2 | 149501061 | 0       | 0       | 0       |
| YRI | HIST2 | 149506061 | 0.3128  | 0.3361  | -0.0935 |
| YRI | HIST2 | 149511061 | 0.6674  | 2.0167  | -1.6133 |
| YRI | HIST2 | 149516061 | 0.5881  | 2.1848  | -1.7927 |
| YRI | HIST2 | 149521061 | 0.2335  | 0.5042  | -0.8507 |
| YRI | HIST2 | 149526061 | 0.073   | 0.3361  | -1.0562 |
| YRI | HIST2 | 149531061 | 0.2339  | 0.5042  | -0.8495 |
| YRI | HIST2 | 149536061 | 0.1609  | 0.1681  | -0.0428 |
| YRI | HIST2 | 149541061 | 0       | 0       | 0       |
| YRI | HIST2 | 149546061 | 0       | 0       | 0       |
| YRI | HIST2 | 149551061 | 0       | 0       | 0       |
| YRI | HIST2 | 149556061 | 0       | 0       | 0       |
| YRI | HIST2 | 149561061 | 0       | 0       | 0       |
| YRI | HIST2 | 149566061 | 0.0278  | 0.3361  | -1.2377 |
| YRI | HIST2 | 149571061 | 0.6993  | 1.1764  | -0.8533 |
| YRI | HIST2 | 149576061 | 1.082   | 1.3445  | -0.4263 |
| YRI | HIST2 | 149581061 | 2.57    | 5.2099  | -1.4289 |
| YRI | HIST2 | 149586061 | 2.8328  | 6.0502  | -1.5244 |
| YRI | HIST2 | 149591061 | 1.0037  | 2.1848  | -1.3261 |
| YRI | HIST2 | 149596061 | 2.1545  | 2.689   | -0.508  |
| YRI | HIST2 | 149601061 | 5.0294  | 5.7141  | -0.3414 |
| YRI | HIST2 | 149606061 | 5.4612  | 6.2183  | -0.35   |
| YRI | HIST2 | 149611061 | 3.6297  | 4.5377  | -0.5548 |
| YRI | HIST2 | 149616061 | 1.3738  | 2.1848  | -0.9106 |
| YRI | HIST2 | 149621061 | 0       | 0       | 0       |
| YRI | HIST2 | 149626061 | 0       | 0       | 0       |
| YRI | HIST2 | 149631061 | 0.0093  | 0.1681  | -0.944  |
| YRI | HIST2 | 149636061 | 2.0972  | 1.5126  | 0.8705  |
| YRI | HIST2 | 149641061 | 3.6907  | 3.0251  | 0.5742  |
| YRI | HIST2 | 149646061 | 6.9691  | 7.7309  | -0.289  |
| YRI | HIST2 | 149651061 | 10.0256 | 11.4282 | -0.3703 |
| YRI | HIST2 | 149656061 | 8.1974  | 8.7392  | -0.1837 |
| YRI | HIST2 | 149661061 | 7.1932  | 8.067   | -0.3189 |
| YRI | HIST2 | 149666061 | 10.2637 | 11.7644 | -0.3855 |
| YRI | HIST2 | 149671061 | 10.6195 | 14.2853 | -0.7838 |
| YRI | HIST2 | 149676061 | 6.802   | 11.0921 | -1.1648 |



## 2\_TajimasD\_data

|     |       |           |        |         |         |
|-----|-------|-----------|--------|---------|---------|
| YRI | HIST2 | 149681061 | 4.7524 | 9.0754  | -1.4151 |
| YRI | HIST2 | 149686061 | 3.0003 | 8.7392  | -1.9453 |
| YRI | HIST2 | 149691061 | 2.7131 | 6.3864  | -1.6579 |
| YRI | HIST2 | 149696061 | 4.4725 | 7.3947  | -1.1547 |
| YRI | HIST2 | 149701061 | 7.1493 | 10.2518 | -0.9068 |
| YRI | HIST2 | 149706061 | 9.2796 | 12.1005 | -0.7057 |
| YRI | HIST2 | 149711061 | 7.5691 | 10.756  | -0.8906 |
| YRI | HIST2 | 149716061 | 8.2773 | 11.4282 | -0.8318 |
| YRI | HIST2 | 149721061 | 9.7818 | 13.2769 | -0.801  |
| YRI | HIST2 | 149726061 | 7.8031 | 13.2769 | -1.2545 |
| YRI | HIST2 | 149731061 | 6.9369 | 12.6047 | -1.3644 |
| YRI | HIST2 | 149736061 | 6.1002 | 9.0754  | -0.9739 |
| YRI | HIST2 | 149741061 | 4.3387 | 6.3864  | -0.9242 |
| YRI | HIST2 | 149746061 | 6.6841 | 6.8906  | -0.087  |
| YRI | HIST2 | 149751061 | 6.9753 | 8.4031  | -0.5018 |
| YRI | HIST2 | 149756061 | 5.4039 | 9.0754  | -1.2019 |
| YRI | HIST2 | 149761061 | 6.6294 | 11.2602 | -1.2397 |
| YRI | HIST2 | 149766061 | 3.5886 | 8.5712  | -1.7195 |
| YRI | HIST2 | 149771061 | 4.6249 | 9.0754  | -1.4569 |
| YRI | HIST2 | 149776061 | 6.6878 | 13.9492 | -1.5881 |
| YRI | HIST2 | 149781061 | 5.4871 | 13.9492 | -1.8507 |
| YRI | HIST2 | 149786061 | 4.5396 | 11.5963 | -1.8376 |
| YRI | HIST2 | 149791061 | 2.4457 | 6.5544  | -1.8114 |
| YRI | HIST2 | 149796061 | 0.7663 | 1.8487  | -1.3845 |
| YRI | HIST2 | 149801061 | 0      | 0       | 0       |
| YRI | HIST2 | 149806061 | 0      | 0       | 0       |
| YRI | HIST2 | 149811061 | 2.3101 | 2.8571  | -0.4947 |
| YRI | HIST2 | 149816061 | 4.2558 | 7.3947  | -1.2403 |
| YRI | HIST2 | 149821061 | 3.2265 | 5.8822  | -1.2904 |
| YRI | HIST2 | 149826061 | 1.2808 | 1.3445  | -0.1035 |
| YRI | HIST2 | 149831061 | 0      | 0       | 0       |
| YRI | HIST2 | 149836061 | 0      | 0       | 0       |
| YRI | HIST2 | 149841061 | 0.405  | 1.0084  | -1.203  |
| YRI | HIST2 | 149846061 | 3.6241 | 7.8989  | -1.5903 |
| YRI | HIST2 | 149851061 | 5.9907 | 14.2853 | -1.7735 |
| YRI | HIST2 | 149856061 | 3.8384 | 11.4282 | -2.0037 |
| YRI | HIST2 | 149861061 | 3.7767 | 10.4199 | -1.9124 |
| YRI | HIST2 | 149866061 | 7.5852 | 13.2769 | -1.3045 |
| YRI | HIST2 | 149871061 | 7.6574 | 12.2685 | -1.1387 |
| YRI | HIST2 | 149876061 | 6.1207 | 11.2602 | -1.3759 |
| YRI | HIST2 | 149881061 | 7.9393 | 11.9324 | -1.0122 |
| YRI | HIST2 | 149886061 | 6.7343 | 11.7644 | -1.2923 |
| YRI | HIST2 | 149891061 | 4.9618 | 11.5963 | -1.7277 |
| YRI | HIST2 | 149896061 | 5.0849 | 12.7727 | -1.8277 |
| YRI | HIST2 | 149901061 | 3.8197 | 11.9324 | -2.0566 |
| YRI | HIST2 | 149906061 | 5.6663 | 11.5963 | -1.5442 |
| YRI | HIST2 | 149911061 | 7.0905 | 12.4366 | -1.3034 |
| YRI | HIST2 | 149916061 | 5.3547 | 11.7644 | -1.6467 |
| YRI | HIST2 | 149921061 | 7.0787 | 13.9492 | -1.5026 |

## 2\_TajimasD\_data

|     |       |           |         |         |         |
|-----|-------|-----------|---------|---------|---------|
| YRI | HIST2 | 149926061 | 8.9319  | 14.2853 | -1.1446 |
| YRI | HIST2 | 149931061 | 8.8564  | 12.7727 | -0.931  |
| YRI | HIST2 | 149936061 | 9.3951  | 12.7727 | -0.803  |
| YRI | HIST2 | 149941061 | 6.6968  | 10.5879 | -1.1035 |
| YRI | HIST2 | 149946061 | 4.7258  | 8.9073  | -1.3927 |
| YRI | HIST2 | 149951061 | 7.1591  | 10.2518 | -0.9039 |
| YRI | HIST2 | 149956061 | 7.7652  | 11.0921 | -0.9033 |
| YRI | HIST2 | 149961061 | 5.1332  | 9.7476  | -1.4136 |
| YRI | HIST2 | 149966061 | 5.526   | 8.9073  | -1.1262 |
| YRI | HIST2 | 149971061 | 7.0876  | 9.4115  | -0.7355 |
| YRI | HIST2 | 149976061 | 7.0174  | 9.7476  | -0.8364 |
| YRI | HIST2 | 149981061 | 7.3634  | 10.5879 | -0.9145 |
| YRI | HIST2 | 149986061 | 9.275   | 11.9324 | -0.6736 |
| YRI | HIST2 | 149991061 | 9.6697  | 13.2769 | -0.8267 |
| YRI | HIST2 | 149996061 | 12.3367 | 15.6298 | -0.6463 |
| YRI | HIST2 | 150001061 | 14.6841 | 15.2937 | -0.1221 |
| YRI | HIST2 | 150006061 | 11.4374 | 13.7811 | -0.5185 |
| YRI | HIST2 | 150011061 | 14.8816 | 17.1423 | -0.4062 |
| YRI | HIST2 | 150016061 | 17.0874 | 17.6465 | -0.0977 |
| YRI | HIST2 | 150021061 | 12.5468 | 14.6214 | -0.4339 |
| YRI | HIST2 | 150026061 | 12.0264 | 14.2853 | -0.483  |
| YRI | HIST2 | 150031061 | 9.9952  | 12.4366 | -0.5952 |
| YRI | HIST2 | 150036061 | 6.9393  | 10.5879 | -1.0347 |
| YRI | HIST2 | 150041061 | 10.3481 | 13.9492 | -0.7876 |
| YRI | HIST2 | 150046061 | 13.2483 | 16.302  | -0.5757 |
| YRI | HIST2 | 150051061 | 9.4244  | 13.613  | -0.9375 |
| YRI | HIST2 | 150056061 | 7.3917  | 12.7727 | -1.2793 |
| YRI | HIST2 | 150061061 | 9.3714  | 13.2769 | -0.8951 |
| YRI | HIST2 | 150066061 | 7.9601  | 11.5963 | -0.9469 |
| YRI | HIST2 | 150071061 | 8.1596  | 13.613  | -1.2206 |
| YRI | HIST2 | 150076061 | 12.3311 | 16.9743 | -0.8421 |
| YRI | HIST2 | 150081061 | 10.6607 | 15.4617 | -0.952  |
| YRI | HIST2 | 150086061 | 12.495  | 16.302  | -0.7177 |
| YRI | HIST2 | 150091061 | 15.2376 | 15.4617 | -0.0444 |
| YRI | HIST2 | 150096061 | 11.59   | 13.7811 | -0.4847 |
| YRI | HIST2 | 150101061 | 11.5804 | 15.2937 | -0.744  |
| YRI | HIST2 | 150106061 | 12.1751 | 16.8062 | -0.848  |
| YRI | HIST2 | 150111061 | 10.3858 | 14.9575 | -0.9356 |
| YRI | HIST2 | 150116061 | 7.6362  | 13.1089 | -1.2695 |
| YRI | HIST2 | 150121061 | 7.9616  | 15.1256 | -1.4506 |
| YRI | HIST2 | 150126061 | 9.9335  | 14.7895 | -1.0046 |
| YRI | HIST2 | 150131061 | 11.393  | 16.302  | -0.9255 |
| YRI | HIST2 | 150136061 | 13.1365 | 18.823  | -0.934  |
| YRI | HIST2 | 150141061 | 11.2407 | 15.9659 | -0.9087 |
| YRI | HIST2 | 150146061 | 7.7856  | 12.2685 | -1.107  |
| YRI | HIST2 | 150151061 | 10.1005 | 12.9408 | -0.6669 |
| YRI | HIST2 | 150156061 | 15.3937 | 16.4701 | -0.2009 |
| YRI | HIST2 | 150161061 | 15.5659 | 18.4868 | -0.4881 |
| YRI | HIST2 | 150166061 | 13.9665 | 17.3104 | -0.5952 |

## 2\_TajimasD\_data

|     |       |           |         |         |         |
|-----|-------|-----------|---------|---------|---------|
| YRI | HIST2 | 150171061 | 12.5194 | 16.4701 | -0.7375 |
| YRI | HIST2 | 150176061 | 12.2169 | 15.9659 | -0.721  |
| YRI | HIST2 | 150181061 | 12.4549 | 14.2853 | -0.3914 |
| YRI | HIST2 | 150186061 | 9.7074  | 12.6047 | -0.6975 |
| YRI | HIST2 | 150191061 | 9.3604  | 11.4282 | -0.5459 |
| YRI | HIST2 | 150196061 | 9.7021  | 10.2518 | -0.1607 |
| YRI | HIST2 | 150201061 | 9.7953  | 10.5879 | -0.2248 |
| YRI | HIST2 | 150206061 | 11.5683 | 12.4366 | -0.2117 |
| YRI | HIST2 | 150211061 | 12.906  | 14.6214 | -0.3587 |
| YRI | HIST2 | 150216061 | 13.1502 | 14.2853 | -0.2427 |
| YRI | HIST2 | 150221061 | 10.7085 | 10.5879 | 0.0342  |
| YRI | HIST2 | 150226061 | 6.3478  | 9.0754  | -0.8929 |
| YRI | HIST2 | 150231061 | 3.7215  | 8.7392  | -1.7009 |
| YRI | HIST2 | 150236061 | 2.8188  | 6.2183  | -1.5716 |
| YRI | HIST2 | 150241061 | 4.3541  | 8.067   | -1.3549 |
| YRI | HIST2 | 150246061 | 6.3342  | 11.4282 | -1.3448 |
| YRI | HIST2 | 150251061 | 6.3345  | 10.5879 | -1.2062 |
| YRI | HIST2 | 150256061 | 7.6761  | 9.5795  | -0.5926 |
| YRI | HIST2 | 150261061 | 14.3801 | 13.1089 | 0.2949  |
| YRI | HIST2 | 150266061 | 18.8856 | 16.6382 | 0.4155  |
| YRI | HIST2 | 150271061 | 15.277  | 15.7978 | -0.1012 |
| YRI | HIST2 | 150276061 | 14.314  | 15.4617 | -0.2276 |
| YRI | HIST2 | 150281061 | 15.6301 | 15.9659 | -0.0646 |
| YRI | HIST2 | 150286061 | 11.3395 | 12.9408 | -0.376  |
| YRI | HIST2 | 150291061 | 8.9155  | 11.7644 | -0.7319 |
| YRI | HIST2 | 150296061 | 10.736  | 12.7727 | -0.4842 |
| YRI | HIST2 | 150301061 | 10.8452 | 12.2685 | -0.3515 |
| YRI | HIST2 | 150306061 | 11.5184 | 14.2853 | -0.5916 |
| YRI | HIST2 | 150311061 | 12.2546 | 13.613  | -0.304  |
| YRI | HIST2 | 150316061 | 14.7263 | 13.7811 | 0.2091  |
| YRI | HIST2 | 150321061 | 13.6878 | 14.6214 | -0.1952 |
| YRI | HIST2 | 150326061 | 11.4443 | 13.7811 | -0.517  |
| YRI | HIST2 | 150331061 | 12.9611 | 13.613  | -0.1459 |
| YRI | HIST2 | 150336061 | 11.3785 | 12.6047 | -0.2952 |
| YRI | HIST2 | 150341061 | 10.8981 | 12.9408 | -0.4797 |
| YRI | HIST2 | 150346061 | 10.6406 | 11.7644 | -0.2887 |
| CEU | HIST2 | 149357608 | 5.9862  | 6.1402  | -0.0725 |
| CEU | HIST2 | 149362608 | 5.215   | 5.1169  | 0.0543  |
| CEU | HIST2 | 149367608 | 2.5683  | 3.2407  | -0.5514 |
| CEU | HIST2 | 149372608 | 3.4358  | 4.7757  | -0.788  |
| CEU | HIST2 | 149377608 | 4.537   | 5.458   | -0.4815 |
| CEU | HIST2 | 149382608 | 3.7069  | 4.0935  | -0.26   |
| CEU | HIST2 | 149387608 | 5.2144  | 4.4346  | 0.4893  |
| CEU | HIST2 | 149392608 | 6.3327  | 5.9697  | 0.1752  |
| CEU | HIST2 | 149397608 | 5.2449  | 5.7991  | -0.2745 |
| CEU | HIST2 | 149402608 | 5.9522  | 5.9697  | -0.0084 |
| CEU | HIST2 | 149407608 | 4.525   | 4.6052  | -0.0487 |
| CEU | HIST2 | 149412608 | 4.3368  | 3.4112  | 0.727   |
| CEU | HIST2 | 149417608 | 4.1068  | 3.2407  | 0.7102  |

## 2\_TajimasD\_data

|     |       |           |        |        |         |
|-----|-------|-----------|--------|--------|---------|
| CEU | HIST2 | 149422608 | 2.0064 | 1.8762 | 0.1658  |
| CEU | HIST2 | 149427608 | 2.7172 | 2.729  | -0.0112 |
| CEU | HIST2 | 149432608 | 2.2086 | 2.3879 | -0.1888 |
| CEU | HIST2 | 149437608 | 0.5232 | 0.6822 | -0.4152 |
| CEU | HIST2 | 149442608 | 0      | 0      | 0       |
| CEU | HIST2 | 149447608 | 0.08   | 0.5117 | -1.3539 |
| CEU | HIST2 | 149452608 | 0.1394 | 0.8528 | -1.6066 |
| CEU | HIST2 | 149457608 | 0.128  | 0.6822 | -1.4472 |
| CEU | HIST2 | 149462608 | 0.0686 | 0.3411 | -1.0924 |
| CEU | HIST2 | 149467608 | 0      | 0      | 0       |
| CEU | HIST2 | 149472608 | 0      | 0      | 0       |
| CEU | HIST2 | 149477608 | 0      | 0      | 0       |
| CEU | HIST2 | 149482608 | 0      | 0      | 0       |
| CEU | HIST2 | 149487608 | 0      | 0      | 0       |
| CEU | HIST2 | 149492608 | 0      | 0      | 0       |
| CEU | HIST2 | 149497608 | 0      | 0      | 0       |
| CEU | HIST2 | 149502608 | 0      | 0      | 0       |
| CEU | HIST2 | 149507608 | 0.1363 | 0.5117 | -1.1774 |
| CEU | HIST2 | 149512608 | 0.4605 | 1.1939 | -1.3069 |
| CEU | HIST2 | 149517608 | 0.3243 | 0.6822 | -0.9346 |
| CEU | HIST2 | 149522608 | 0      | 0      | 0       |
| CEU | HIST2 | 149527608 | 0.0101 | 0.1706 | -0.9534 |
| CEU | HIST2 | 149532608 | 0.0101 | 0.1706 | -0.9534 |
| CEU | HIST2 | 149537608 | 0      | 0      | 0       |
| CEU | HIST2 | 149542608 | 0      | 0      | 0       |
| CEU | HIST2 | 149547608 | 0      | 0      | 0       |
| CEU | HIST2 | 149552608 | 0      | 0      | 0       |
| CEU | HIST2 | 149557608 | 0      | 0      | 0       |
| CEU | HIST2 | 149562608 | 0      | 0      | 0       |
| CEU | HIST2 | 149567608 | 0.5038 | 0.1706 | 1.9793  |
| CEU | HIST2 | 149572608 | 0.885  | 0.6822 | 0.5296  |
| CEU | HIST2 | 149577608 | 0.4805 | 1.0234 | -1.0788 |
| CEU | HIST2 | 149582608 | 2.8182 | 3.2407 | -0.3464 |
| CEU | HIST2 | 149587608 | 3.7007 | 3.2407 | 0.3772  |
| CEU | HIST2 | 149592608 | 2.1459 | 2.0467 | 0.118   |
| CEU | HIST2 | 149597608 | 2.4286 | 2.8996 | -0.4236 |
| CEU | HIST2 | 149602608 | 5.8841 | 4.4346 | 0.9095  |
| CEU | HIST2 | 149607608 | 7.5261 | 4.6052 | 1.7734  |
| CEU | HIST2 | 149612608 | 3.7706 | 2.2173 | 1.7353  |
| CEU | HIST2 | 149617608 | 0.8642 | 0.6822 | 0.4753  |
| CEU | HIST2 | 149622608 | 0      | 0      | 0       |
| CEU | HIST2 | 149627608 | 0.0301 | 0.1706 | -0.8346 |
| CEU | HIST2 | 149632608 | 0.0301 | 0.1706 | -0.8346 |
| CEU | HIST2 | 149637608 | 2.3997 | 1.7056 | 0.9507  |
| CEU | HIST2 | 149642608 | 3.7413 | 3.5818 | 0.1202  |
| CEU | HIST2 | 149647608 | 7.4811 | 6.6519 | 0.363   |
| CEU | HIST2 | 149652608 | 7.906  | 6.1402 | 0.8309  |
| CEU | HIST2 | 149657608 | 4.3752 | 3.5818 | 0.598   |
| CEU | HIST2 | 149662608 | 6.0134 | 6.3108 | -0.1365 |

## 2\_TajimasD\_data

|     |       |           |         |        |         |
|-----|-------|-----------|---------|--------|---------|
| CEU | HIST2 | 149667608 | 5.1379  | 9.0398 | -1.2901 |
| CEU | HIST2 | 149672608 | 5.4801  | 9.5515 | -1.2791 |
| CEU | HIST2 | 149677608 | 5.5494  | 7.3342 | -0.7151 |
| CEU | HIST2 | 149682608 | 2.4492  | 4.4346 | -1.2457 |
| CEU | HIST2 | 149687608 | 0.9285  | 3.2407 | -1.896  |
| CEU | HIST2 | 149692608 | 1.3814  | 3.4112 | -1.5942 |
| CEU | HIST2 | 149697608 | 2.9058  | 5.2874 | -1.2806 |
| CEU | HIST2 | 149702608 | 5.2948  | 6.9931 | -0.7106 |
| CEU | HIST2 | 149707608 | 8.1801  | 7.3342 | 0.3389  |
| CEU | HIST2 | 149712608 | 8.9034  | 7.3342 | 0.6287  |
| CEU | HIST2 | 149717608 | 10.1014 | 8.0164 | 0.7701  |
| CEU | HIST2 | 149722608 | 9.1266  | 6.9931 | 0.8927  |
| CEU | HIST2 | 149727608 | 6.7996  | 6.6519 | 0.0647  |
| CEU | HIST2 | 149732608 | 5.9891  | 5.7991 | 0.0941  |
| CEU | HIST2 | 149737608 | 3.3105  | 3.4112 | -0.0791 |
| CEU | HIST2 | 149742608 | 2.4663  | 3.4112 | -0.7421 |
| CEU | HIST2 | 149747608 | 4.6718  | 4.0935 | 0.3889  |
| CEU | HIST2 | 149752608 | 3.3781  | 3.0701 | 0.2642  |
| CEU | HIST2 | 149757608 | 1.8277  | 3.2407 | -1.1586 |
| CEU | HIST2 | 149762608 | 2.309   | 5.1169 | -1.5542 |
| CEU | HIST2 | 149767608 | 2.5848  | 5.458  | -1.502  |
| CEU | HIST2 | 149772608 | 3.2146  | 5.9697 | -1.3296 |
| CEU | HIST2 | 149777608 | 4.2707  | 6.4814 | -0.9909 |
| CEU | HIST2 | 149782608 | 5.437   | 7.6753 | -0.8603 |
| CEU | HIST2 | 149787608 | 3.9297  | 7.1636 | -1.3238 |
| CEU | HIST2 | 149792608 | 1.4871  | 3.0701 | -1.3579 |
| CEU | HIST2 | 149797608 | 0.1235  | 0.1706 | -0.2798 |
| CEU | HIST2 | 149802608 | 0       | 0      | 0       |
| CEU | HIST2 | 149807608 | 0       | 0      | 0       |
| CEU | HIST2 | 149812608 | 1.5739  | 2.0467 | -0.5626 |
| CEU | HIST2 | 149817608 | 2.7071  | 4.2641 | -1.0107 |
| CEU | HIST2 | 149822608 | 1.6324  | 2.3879 | -0.7956 |
| CEU | HIST2 | 149827608 | 0.4993  | 0.1706 | 1.9525  |
| CEU | HIST2 | 149832608 | 0       | 0      | 0       |
| CEU | HIST2 | 149837608 | 0       | 0      | 0       |
| CEU | HIST2 | 149842608 | 1.0373  | 1.5351 | -0.7381 |
| CEU | HIST2 | 149847608 | 2.0711  | 4.0935 | -1.3599 |
| CEU | HIST2 | 149852608 | 2.2626  | 5.2874 | -1.6264 |
| CEU | HIST2 | 149857608 | 3.1433  | 6.6519 | -1.5361 |
| CEU | HIST2 | 149862608 | 4.2778  | 8.0164 | -1.3809 |
| CEU | HIST2 | 149867608 | 4.6148  | 8.187  | -1.2941 |
| CEU | HIST2 | 149872608 | 4.3408  | 6.8225 | -1.0619 |
| CEU | HIST2 | 149877608 | 4.0765  | 6.6519 | -1.1276 |
| CEU | HIST2 | 149882608 | 2.7013  | 5.2874 | -1.3906 |
| CEU | HIST2 | 149887608 | 2.3034  | 3.5818 | -0.9635 |
| CEU | HIST2 | 149892608 | 3.6768  | 4.7757 | -0.6463 |
| CEU | HIST2 | 149897608 | 3.5384  | 5.6286 | -1.0632 |
| CEU | HIST2 | 149902608 | 3.7986  | 6.1402 | -1.1019 |
| CEU | HIST2 | 149907608 | 3.8075  | 5.458  | -0.8628 |

## 2\_TajimasD\_data

|     |       |           |         |         |         |
|-----|-------|-----------|---------|---------|---------|
| CEU | HIST2 | 149912608 | 1.6186  | 3.9229  | -1.6072 |
| CEU | HIST2 | 149917608 | 1.7209  | 4.0935  | -1.5954 |
| CEU | HIST2 | 149922608 | 3.7137  | 5.1169  | -0.7767 |
| CEU | HIST2 | 149927608 | 4.1686  | 5.6286  | -0.7426 |
| CEU | HIST2 | 149932608 | 2.6271  | 5.6286  | -1.5267 |
| CEU | HIST2 | 149937608 | 2.0439  | 4.6052  | -1.5551 |
| CEU | HIST2 | 149942608 | 2.6215  | 3.7524  | -0.8193 |
| CEU | HIST2 | 149947608 | 2.2977  | 4.4346  | -1.3408 |
| CEU | HIST2 | 149952608 | 2.9812  | 5.9697  | -1.4423 |
| CEU | HIST2 | 149957608 | 2.1946  | 4.4346  | -1.4055 |
| CEU | HIST2 | 149962608 | 1.1688  | 2.5584  | -1.3843 |
| CEU | HIST2 | 149967608 | 2.1791  | 3.2407  | -0.8705 |
| CEU | HIST2 | 149972608 | 2.1725  | 3.7524  | -1.1446 |
| CEU | HIST2 | 149977608 | 1.94    | 4.2641  | -1.5087 |
| CEU | HIST2 | 149982608 | 3.1398  | 5.1169  | -1.0944 |
| CEU | HIST2 | 149987608 | 4.1952  | 6.1402  | -0.9153 |
| CEU | HIST2 | 149992608 | 5.8895  | 7.6753  | -0.6864 |
| CEU | HIST2 | 149997608 | 9.3993  | 8.5281  | 0.304   |
| CEU | HIST2 | 150002608 | 8.1973  | 6.8225  | 0.5883  |
| CEU | HIST2 | 150007608 | 7.1431  | 6.8225  | 0.1372  |
| CEU | HIST2 | 150012608 | 11.1517 | 9.3809  | 0.5657  |
| CEU | HIST2 | 150017608 | 10.7794 | 8.8692  | 0.6428  |
| CEU | HIST2 | 150022608 | 8.8606  | 7.6753  | 0.4556  |
| CEU | HIST2 | 150027608 | 6.0136  | 6.1402  | -0.0596 |
| CEU | HIST2 | 150032608 | 1.9462  | 4.2641  | -1.5046 |
| CEU | HIST2 | 150037608 | 2.7005  | 5.7991  | -1.5347 |
| CEU | HIST2 | 150042608 | 4.1932  | 6.3108  | -0.9722 |
| CEU | HIST2 | 150047608 | 4.4902  | 5.458   | -0.5059 |
| CEU | HIST2 | 150052608 | 3.1923  | 4.9463  | -1.0003 |
| CEU | HIST2 | 150057608 | 2.1128  | 4.4346  | -1.4568 |
| CEU | HIST2 | 150062608 | 3.0056  | 4.7757  | -1.0411 |
| CEU | HIST2 | 150067608 | 2.2927  | 3.4112  | -0.8785 |
| CEU | HIST2 | 150072608 | 5.9037  | 5.7991  | 0.0518  |
| CEU | HIST2 | 150077608 | 7.4368  | 7.6753  | -0.0917 |
| CEU | HIST2 | 150082608 | 3.0985  | 5.458   | -1.2335 |
| CEU | HIST2 | 150087608 | 3.1278  | 6.9931  | -1.6173 |
| CEU | HIST2 | 150092608 | 4.0282  | 6.6519  | -1.1487 |
| CEU | HIST2 | 150097608 | 3.9445  | 4.7757  | -0.4889 |
| CEU | HIST2 | 150102608 | 5.1649  | 6.8225  | -0.7093 |
| CEU | HIST2 | 150107608 | 6.5529  | 6.9931  | -0.1842 |
| CEU | HIST2 | 150112608 | 5.0695  | 5.458   | -0.2031 |
| CEU | HIST2 | 150117608 | 2.9899  | 4.9463  | -1.1157 |
| CEU | HIST2 | 150122608 | 3.677   | 6.1402  | -1.1591 |
| CEU | HIST2 | 150127608 | 5.6514  | 8.0164  | -0.8735 |
| CEU | HIST2 | 150132608 | 6.0334  | 8.8692  | -0.9543 |
| CEU | HIST2 | 150137608 | 6.3882  | 11.7688 | -1.3905 |
| CEU | HIST2 | 150142608 | 6.8081  | 9.7221  | -0.9005 |
| CEU | HIST2 | 150147608 | 5.0326  | 6.1402  | -0.5212 |
| CEU | HIST2 | 150152608 | 2.9186  | 7.1636  | -1.7377 |

## 2\_TajimasD\_data

|     |       |           |         |         |         |
|-----|-------|-----------|---------|---------|---------|
| CEU | HIST2 | 150157608 | 5.2208  | 9.3809  | -1.329  |
| CEU | HIST2 | 150162608 | 9.0115  | 9.7221  | -0.2196 |
| CEU | HIST2 | 150167608 | 10.0012 | 7.8459  | 0.8119  |
| CEU | HIST2 | 150172608 | 8.5935  | 6.8225  | 0.7578  |
| CEU | HIST2 | 150177608 | 6.5925  | 5.458   | 0.5931  |
| CEU | HIST2 | 150182608 | 7.6821  | 6.1402  | 0.7256  |
| CEU | HIST2 | 150187608 | 6.2696  | 6.8225  | -0.2366 |
| CEU | HIST2 | 150192608 | 5.329   | 5.9697  | -0.3092 |
| CEU | HIST2 | 150197608 | 7.9913  | 6.3108  | 0.7716  |
| CEU | HIST2 | 150202608 | 9.3094  | 7.5047  | 0.7081  |
| CEU | HIST2 | 150207608 | 9.4055  | 8.0164  | 0.5131  |
| CEU | HIST2 | 150212608 | 9.5529  | 7.1636  | 0.9781  |
| CEU | HIST2 | 150217608 | 8.7254  | 6.6519  | 0.9078  |
| CEU | HIST2 | 150222608 | 6.4754  | 6.1402  | 0.1577  |
| CEU | HIST2 | 150227608 | 3.2977  | 4.2641  | -0.6273 |
| CEU | HIST2 | 150232608 | 2.1822  | 3.2407  | -0.8679 |
| CEU | HIST2 | 150237608 | 3.665   | 3.2407  | 0.3479  |
| CEU | HIST2 | 150242608 | 3.5269  | 4.4346  | -0.5695 |
| CEU | HIST2 | 150247608 | 4.9192  | 5.2874  | -0.198  |
| CEU | HIST2 | 150252608 | 5.5411  | 5.1169  | 0.2348  |
| CEU | HIST2 | 150257608 | 9.2389  | 7.6753  | 0.601   |
| CEU | HIST2 | 150262608 | 14.1268 | 8.6987  | 1.8596  |
| CEU | HIST2 | 150267608 | 17.9592 | 10.2337 | 2.276   |
| CEU | HIST2 | 150272608 | 17.1991 | 11.7688 | 1.4034  |
| CEU | HIST2 | 150277608 | 13.5372 | 10.916  | 0.727   |
| CEU | HIST2 | 150282608 | 14.9565 | 10.7454 | 1.1853  |
| CEU | HIST2 | 150287608 | 13.2278 | 8.5281  | 1.6398  |
| CEU | HIST2 | 150292608 | 10.5072 | 7.3342  | 1.2713  |
| CEU | HIST2 | 150297608 | 8.1028  | 7.1636  | 0.3845  |
| CEU | HIST2 | 150302608 | 7.8625  | 7.5047  | 0.1404  |
| CEU | HIST2 | 150307608 | 10.5539 | 9.5515  | 0.3149  |
| CEU | HIST2 | 150312608 | 10.9722 | 9.7221  | 0.3863  |
| CEU | HIST2 | 150317608 | 13.53   | 10.4043 | 0.9067  |
| CEU | HIST2 | 150322608 | 13.6542 | 9.8926  | 1.1438  |
| CEU | HIST2 | 150327608 | 12.6128 | 9.3809  | 1.0325  |
| CEU | HIST2 | 150332608 | 11.9378 | 9.0398  | 0.9581  |
| CEU | HIST2 | 150337608 | 9.3365  | 8.3576  | 0.348   |
| CEU | HIST2 | 150342608 | 10.478  | 9.0398  | 0.4755  |
| CEU | HIST2 | 150347608 | 10.2558 | 8.187   | 0.7495  |
| CHB | HIST2 | 149357608 | 5.32    | 5.4213  | -0.0531 |
| CHB | HIST2 | 149362608 | 4.5073  | 4.066   | 0.2976  |
| CHB | HIST2 | 149367608 | 2.1862  | 3.7271  | -1.1194 |
| CHB | HIST2 | 149372608 | 2.4207  | 5.0825  | -1.4778 |
| CHB | HIST2 | 149377608 | 3.2859  | 5.0825  | -0.9974 |
| CHB | HIST2 | 149382608 | 3.0581  | 3.8965  | -0.5864 |
| CHB | HIST2 | 149387608 | 4.0811  | 5.5907  | -0.7702 |
| CHB | HIST2 | 149392608 | 4.9347  | 5.7601  | -0.4101 |
| CHB | HIST2 | 149397608 | 4.4259  | 5.4213  | -0.522  |
| CHB | HIST2 | 149402608 | 4.8871  | 6.6072  | -0.7555 |

## 2\_TajimasD\_data

|     |       |           |        |        |         |
|-----|-------|-----------|--------|--------|---------|
| CHB | HIST2 | 149407608 | 3.0881 | 4.7436 | -0.9765 |
| CHB | HIST2 | 149412608 | 3.8921 | 4.5742 | -0.4153 |
| CHB | HIST2 | 149417608 | 4.2707 | 4.5742 | -0.1848 |
| CHB | HIST2 | 149422608 | 1.5298 | 2.8801 | -1.2174 |
| CHB | HIST2 | 149427608 | 1.9899 | 3.7271 | -1.262  |
| CHB | HIST2 | 149432608 | 1.8957 | 3.2189 | -1.0879 |
| CHB | HIST2 | 149437608 | 0.399  | 0.8471 | -1.0105 |
| CHB | HIST2 | 149442608 | 0      | 0      | 0       |
| CHB | HIST2 | 149447608 | 0.0386 | 0.5082 | -1.4741 |
| CHB | HIST2 | 149452608 | 0.1065 | 1.3553 | -2.0239 |
| CHB | HIST2 | 149457608 | 0.0873 | 1.1859 | -1.961  |
| CHB | HIST2 | 149462608 | 0.0194 | 0.3388 | -1.2812 |
| CHB | HIST2 | 149467608 | 0      | 0      | 0       |
| CHB | HIST2 | 149472608 | 0      | 0      | 0       |
| CHB | HIST2 | 149477608 | 0      | 0      | 0       |
| CHB | HIST2 | 149482608 | 0      | 0      | 0       |
| CHB | HIST2 | 149487608 | 0      | 0      | 0       |
| CHB | HIST2 | 149492608 | 0      | 0      | 0       |
| CHB | HIST2 | 149497608 | 0      | 0      | 0       |
| CHB | HIST2 | 149502608 | 0      | 0      | 0       |
| CHB | HIST2 | 149507608 | 0.6372 | 0.6777 | -0.1059 |
| CHB | HIST2 | 149512608 | 0.8968 | 1.0165 | -0.2382 |
| CHB | HIST2 | 149517608 | 0.2694 | 0.5082 | -0.7496 |
| CHB | HIST2 | 149522608 | 0.0097 | 0.1694 | -0.949  |
| CHB | HIST2 | 149527608 | 0.2578 | 0.1694 | 0.5253  |
| CHB | HIST2 | 149532608 | 0.2578 | 0.1694 | 0.5253  |
| CHB | HIST2 | 149537608 | 0      | 0      | 0       |
| CHB | HIST2 | 149542608 | 0      | 0      | 0       |
| CHB | HIST2 | 149547608 | 0      | 0      | 0       |
| CHB | HIST2 | 149552608 | 0      | 0      | 0       |
| CHB | HIST2 | 149557608 | 0      | 0      | 0       |
| CHB | HIST2 | 149562608 | 0      | 0      | 0       |
| CHB | HIST2 | 149567608 | 0.4601 | 0.3388 | 0.4866  |
| CHB | HIST2 | 149572608 | 0.9039 | 0.8471 | 0.1281  |
| CHB | HIST2 | 149577608 | 1.095  | 1.0165 | 0.1562  |
| CHB | HIST2 | 149582608 | 3.3082 | 3.3883 | -0.0631 |
| CHB | HIST2 | 149587608 | 3.4287 | 3.5577 | -0.0975 |
| CHB | HIST2 | 149592608 | 2.0525 | 1.6942 | 0.4917  |
| CHB | HIST2 | 149597608 | 2.9082 | 2.2024 | 0.7903  |
| CHB | HIST2 | 149602608 | 6.534  | 4.2354 | 1.4964  |
| CHB | HIST2 | 149607608 | 7.0862 | 5.4213 | 0.873   |
| CHB | HIST2 | 149612608 | 2.7537 | 2.8801 | -0.114  |
| CHB | HIST2 | 149617608 | 0.574  | 0.5082 | 0.2066  |
| CHB | HIST2 | 149622608 | 0      | 0      | 0       |
| CHB | HIST2 | 149627608 | 0.0097 | 0.1694 | -0.949  |
| CHB | HIST2 | 149632608 | 0.0097 | 0.1694 | -0.949  |
| CHB | HIST2 | 149637608 | 2.8808 | 1.5247 | 2.0147  |
| CHB | HIST2 | 149642608 | 4.7697 | 4.2354 | 0.3478  |
| CHB | HIST2 | 149647608 | 7.5328 | 6.7766 | 0.3246  |



## 2\_TajimasD\_data

|     |       |           |        |        |         |
|-----|-------|-----------|--------|--------|---------|
| CHB | HIST2 | 149652608 | 6.6267 | 5.4213 | 0.6321  |
| CHB | HIST2 | 149657608 | 3.0921 | 4.5742 | -0.9025 |
| CHB | HIST2 | 149662608 | 5.9966 | 5.4213 | 0.3017  |
| CHB | HIST2 | 149667608 | 7.7933 | 6.6072 | 0.5209  |
| CHB | HIST2 | 149672608 | 8.1593 | 8.6402 | -0.1653 |
| CHB | HIST2 | 149677608 | 6.0487 | 6.4378 | -0.175  |
| CHB | HIST2 | 149682608 | 2.9461 | 4.7436 | -1.0603 |
| CHB | HIST2 | 149687608 | 2.256  | 4.2354 | -1.2886 |
| CHB | HIST2 | 149692608 | 3.1883 | 4.066  | -0.5919 |
| CHB | HIST2 | 149697608 | 4.2125 | 4.5742 | -0.2202 |
| CHB | HIST2 | 149702608 | 6.1365 | 6.946  | -0.3398 |
| CHB | HIST2 | 149707608 | 8.0221 | 7.9625 | 0.0221  |
| CHB | HIST2 | 149712608 | 6.7044 | 6.0989 | 0.2858  |
| CHB | HIST2 | 149717608 | 7.4384 | 8.1319 | -0.2521 |
| CHB | HIST2 | 149722608 | 7.7087 | 8.979  | -0.4214 |
| CHB | HIST2 | 149727608 | 6.5926 | 8.6402 | -0.7038 |
| CHB | HIST2 | 149732608 | 5.754  | 7.2848 | -0.6153 |
| CHB | HIST2 | 149737608 | 2.7881 | 4.2354 | -0.9422 |
| CHB | HIST2 | 149742608 | 1.5443 | 3.0495 | -1.2945 |
| CHB | HIST2 | 149747608 | 3.8666 | 2.8801 | 0.8894  |
| CHB | HIST2 | 149752608 | 3.2732 | 2.8801 | 0.3544  |
| CHB | HIST2 | 149757608 | 1.1856 | 5.5907 | -2.2476 |
| CHB | HIST2 | 149762608 | 1.9924 | 6.6072 | -2.0269 |
| CHB | HIST2 | 149767608 | 2.1599 | 4.7436 | -1.5241 |
| CHB | HIST2 | 149772608 | 1.3105 | 5.7601 | -2.2107 |
| CHB | HIST2 | 149777608 | 0.7826 | 4.913  | -2.3626 |
| CHB | HIST2 | 149782608 | 1.0343 | 4.5742 | -2.1555 |
| CHB | HIST2 | 149787608 | 0.7342 | 5.5907 | -2.4779 |
| CHB | HIST2 | 149792608 | 0.4026 | 3.3883 | -2.3513 |
| CHB | HIST2 | 149797608 | 0.1611 | 0.6777 | -1.3505 |
| CHB | HIST2 | 149802608 | 0      | 0      | 0       |
| CHB | HIST2 | 149807608 | 0      | 0      | 0       |
| CHB | HIST2 | 149812608 | 0.4782 | 2.033  | -1.8541 |
| CHB | HIST2 | 149817608 | 1.276  | 5.4213 | -2.1737 |
| CHB | HIST2 | 149822608 | 1.1639 | 3.5577 | -1.8091 |
| CHB | HIST2 | 149827608 | 0.3661 | 0.1694 | 1.1688  |
| CHB | HIST2 | 149832608 | 0      | 0      | 0       |
| CHB | HIST2 | 149837608 | 0      | 0      | 0       |
| CHB | HIST2 | 149842608 | 0.2781 | 1.6942 | -1.9434 |
| CHB | HIST2 | 149847608 | 0.6405 | 4.913  | -2.4439 |
| CHB | HIST2 | 149852608 | 0.9076 | 7.2848 | -2.5634 |
| CHB | HIST2 | 149857608 | 1.5464 | 6.2684 | -2.1748 |
| CHB | HIST2 | 149862608 | 1.4534 | 6.6072 | -2.2636 |
| CHB | HIST2 | 149867608 | 0.9816 | 6.946  | -2.5036 |
| CHB | HIST2 | 149872608 | 1.0914 | 5.7601 | -2.3195 |
| CHB | HIST2 | 149877608 | 1.6109 | 6.7766 | -2.2175 |
| CHB | HIST2 | 149882608 | 1.7603 | 7.1154 | -2.1992 |
| CHB | HIST2 | 149887608 | 1.2762 | 5.7601 | -2.2277 |
| CHB | HIST2 | 149892608 | 1.5239 | 6.7766 | -2.2548 |

## 2\_TajimasD\_data

|     |       |           |        |         |         |
|-----|-------|-----------|--------|---------|---------|
| CHB | HIST2 | 149897608 | 1.1626 | 7.2848  | -2.4609 |
| CHB | HIST2 | 149902608 | 1.4296 | 6.946   | -2.3156 |
| CHB | HIST2 | 149907608 | 2.603  | 7.9625  | -1.9861 |
| CHB | HIST2 | 149912608 | 1.5418 | 6.2684  | -2.1769 |
| CHB | HIST2 | 149917608 | 1.5016 | 6.946   | -2.2853 |
| CHB | HIST2 | 149922608 | 3.5157 | 8.979   | -1.8123 |
| CHB | HIST2 | 149927608 | 3.9733 | 10.3343 | -1.8516 |
| CHB | HIST2 | 149932608 | 2.1807 | 10.3343 | -2.3734 |
| CHB | HIST2 | 149937608 | 2.0573 | 9.3178  | -2.3273 |
| CHB | HIST2 | 149942608 | 2.9528 | 7.9625  | -1.8564 |
| CHB | HIST2 | 149947608 | 2.0617 | 6.2684  | -1.9375 |
| CHB | HIST2 | 149952608 | 1.9785 | 7.9625  | -2.2175 |
| CHB | HIST2 | 149957608 | 1.6149 | 7.7931  | -2.335  |
| CHB | HIST2 | 149962608 | 1.0074 | 6.2684  | -2.423  |
| CHB | HIST2 | 149967608 | 1.1896 | 6.4378  | -2.3598 |
| CHB | HIST2 | 149972608 | 1.4017 | 5.2519  | -2.0765 |
| CHB | HIST2 | 149977608 | 1.5852 | 4.7436  | -1.8631 |
| CHB | HIST2 | 149982608 | 2.2138 | 7.7931  | -2.1087 |
| CHB | HIST2 | 149987608 | 2.6172 | 10.1649 | -2.2312 |
| CHB | HIST2 | 149992608 | 3.9113 | 9.6567  | -1.7815 |
| CHB | HIST2 | 149997608 | 6.7367 | 10.5037 | -1.08   |
| CHB | HIST2 | 150002608 | 5.34   | 9.9955  | -1.398  |
| CHB | HIST2 | 150007608 | 2.8742 | 9.4872  | -2.0846 |
| CHB | HIST2 | 150012608 | 2.2077 | 10.3343 | -2.3655 |
| CHB | HIST2 | 150017608 | 1.5117 | 8.8096  | -2.464  |
| CHB | HIST2 | 150022608 | 1.7512 | 8.979   | -2.3977 |
| CHB | HIST2 | 150027608 | 1.3954 | 8.6402  | -2.4903 |
| CHB | HIST2 | 150032608 | 1.1041 | 6.4378  | -2.3982 |
| CHB | HIST2 | 150037608 | 1.8192 | 6.4378  | -2.0767 |
| CHB | HIST2 | 150042608 | 1.9001 | 6.7766  | -2.0933 |
| CHB | HIST2 | 150047608 | 0.9438 | 6.946   | -2.5195 |
| CHB | HIST2 | 150052608 | 1.0657 | 6.6072  | -2.4339 |
| CHB | HIST2 | 150057608 | 1.1483 | 5.9295  | -2.3146 |
| CHB | HIST2 | 150062608 | 0.6227 | 5.0825  | -2.476  |
| CHB | HIST2 | 150067608 | 0.582  | 5.0825  | -2.4986 |
| CHB | HIST2 | 150072608 | 1.3189 | 7.4543  | -2.4151 |
| CHB | HIST2 | 150077608 | 1.3231 | 7.4543  | -2.4134 |
| CHB | HIST2 | 150082608 | 0.8818 | 5.2519  | -2.3569 |
| CHB | HIST2 | 150087608 | 1.351  | 6.2684  | -2.2648 |
| CHB | HIST2 | 150092608 | 1.5734 | 6.7766  | -2.2335 |
| CHB | HIST2 | 150097608 | 1.4826 | 6.2684  | -2.2042 |
| CHB | HIST2 | 150102608 | 1.6471 | 7.9625  | -2.3403 |
| CHB | HIST2 | 150107608 | 1.8193 | 7.9625  | -2.2765 |
| CHB | HIST2 | 150112608 | 1.419  | 6.2684  | -2.2335 |
| CHB | HIST2 | 150117608 | 1.3644 | 6.2684  | -2.2586 |
| CHB | HIST2 | 150122608 | 2.214  | 7.4543  | -2.0627 |
| CHB | HIST2 | 150127608 | 2.5919 | 7.7931  | -1.9658 |
| CHB | HIST2 | 150132608 | 2.1512 | 8.4708  | -2.2123 |
| CHB | HIST2 | 150137608 | 2.0793 | 9.8261  | -2.3636 |

## 2\_TajimasD\_data

|     |       |           |         |         |         |
|-----|-------|-----------|---------|---------|---------|
| CHB | HIST2 | 150142608 | 2.6756  | 9.3178  | -2.1291 |
| CHB | HIST2 | 150147608 | 2.7567  | 8.4708  | -2.0003 |
| CHB | HIST2 | 150152608 | 1.9176  | 8.8096  | -2.3269 |
| CHB | HIST2 | 150157608 | 2.6929  | 12.5367 | -2.3899 |
| CHB | HIST2 | 150162608 | 6.6802  | 12.3673 | -1.3986 |
| CHB | HIST2 | 150167608 | 9.7999  | 9.8261  | -0.008  |
| CHB | HIST2 | 150172608 | 7.3478  | 10.3343 | -0.8693 |
| CHB | HIST2 | 150177608 | 5.632   | 10.1649 | -1.34   |
| CHB | HIST2 | 150182608 | 7.0729  | 9.3178  | -0.7196 |
| CHB | HIST2 | 150187608 | 4.4826  | 6.7766  | -0.9847 |
| CHB | HIST2 | 150192608 | 4.0677  | 6.7766  | -1.1628 |
| CHB | HIST2 | 150197608 | 8.1792  | 9.1484  | -0.316  |
| CHB | HIST2 | 150202608 | 9.2675  | 10.1649 | -0.2653 |
| CHB | HIST2 | 150207608 | 8.6516  | 11.1814 | -0.684  |
| CHB | HIST2 | 150212608 | 8.9216  | 11.6896 | -0.7178 |
| CHB | HIST2 | 150217608 | 7.8589  | 9.9955  | -0.6416 |
| CHB | HIST2 | 150222608 | 5.5899  | 8.4708  | -1.0085 |
| CHB | HIST2 | 150227608 | 2.9787  | 6.4378  | -1.5553 |
| CHB | HIST2 | 150232608 | 2.1055  | 4.2354  | -1.3866 |
| CHB | HIST2 | 150237608 | 3.3891  | 4.5742  | -0.7216 |
| CHB | HIST2 | 150242608 | 3.8846  | 5.9295  | -0.99   |
| CHB | HIST2 | 150247608 | 5.0069  | 7.2848  | -0.9156 |
| CHB | HIST2 | 150252608 | 4.7007  | 7.7931  | -1.1688 |
| CHB | HIST2 | 150257608 | 7.4337  | 8.4708  | -0.3631 |
| CHB | HIST2 | 150262608 | 10.3708 | 9.9955  | 0.1127  |
| CHB | HIST2 | 150267608 | 12.8372 | 11.5202 | 0.3463  |
| CHB | HIST2 | 150272608 | 11.6988 | 10.8426 | 0.2383  |
| CHB | HIST2 | 150277608 | 8.2179  | 10.5037 | -0.6553 |
| CHB | HIST2 | 150282608 | 10.3892 | 12.3673 | -0.4865 |
| CHB | HIST2 | 150287608 | 10.2166 | 10.8426 | -0.1742 |
| CHB | HIST2 | 150292608 | 7.4507  | 8.6402  | -0.4089 |
| CHB | HIST2 | 150297608 | 4.8423  | 7.9625  | -1.1562 |
| CHB | HIST2 | 150302608 | 5.5199  | 8.3013  | -0.992  |
| CHB | HIST2 | 150307608 | 7.8342  | 10.6731 | -0.8018 |
| CHB | HIST2 | 150312608 | 7.9126  | 9.6567  | -0.5408 |
| CHB | HIST2 | 150317608 | 9.4849  | 9.9955  | -0.1533 |
| CHB | HIST2 | 150322608 | 8.8245  | 11.3508 | -0.6735 |
| CHB | HIST2 | 150327608 | 8.6354  | 11.6896 | -0.792  |
| CHB | HIST2 | 150332608 | 8.5037  | 11.3508 | -0.759  |
| CHB | HIST2 | 150337608 | 6.0792  | 7.9625  | -0.6979 |
| CHB | HIST2 | 150342608 | 7.1215  | 6.4378  | 0.3074  |
| CHB | HIST2 | 150347608 | 7.0495  | 7.6237  | -0.2214 |
| YRI | HIST2 | 149357608 | 6.3206  | 6.7225  | -0.1732 |
| YRI | HIST2 | 149362608 | 4.8751  | 7.0586  | -0.9001 |
| YRI | HIST2 | 149367608 | 3.0712  | 6.3864  | -1.4962 |
| YRI | HIST2 | 149372608 | 3.3885  | 7.3947  | -1.5831 |
| YRI | HIST2 | 149377608 | 4.0781  | 7.5628  | -1.349  |
| YRI | HIST2 | 149382608 | 4.4672  | 5.7141  | -0.6218 |
| YRI | HIST2 | 149387608 | 6.215   | 6.0502  | 0.0781  |

## 2\_TajimasD\_data

|     |       |           |        |        |         |
|-----|-------|-----------|--------|--------|---------|
| YRI | HIST2 | 149392608 | 6.7938 | 7.2267 | -0.1747 |
| YRI | HIST2 | 149397608 | 5.7216 | 7.3947 | -0.6611 |
| YRI | HIST2 | 149402608 | 7.2413 | 8.9073 | -0.5549 |
| YRI | HIST2 | 149407608 | 5.7873 | 8.5712 | -0.9607 |
| YRI | HIST2 | 149412608 | 5.3418 | 7.5628 | -0.8598 |
| YRI | HIST2 | 149417608 | 5.4578 | 5.7141 | -0.1278 |
| YRI | HIST2 | 149422608 | 2.9383 | 3.3612 | -0.3341 |
| YRI | HIST2 | 149427608 | 3.1793 | 4.2016 | -0.6678 |
| YRI | HIST2 | 149432608 | 2.5221 | 3.3612 | -0.6629 |
| YRI | HIST2 | 149437608 | 0.5529 | 1.0084 | -0.9081 |
| YRI | HIST2 | 149442608 | 0.0185 | 0.1681 | -0.8893 |
| YRI | HIST2 | 149447608 | 0.1568 | 0.5042 | -1.0918 |
| YRI | HIST2 | 149452608 | 0.4181 | 1.1764 | -1.3563 |
| YRI | HIST2 | 149457608 | 0.5682 | 1.5126 | -1.4063 |
| YRI | HIST2 | 149462608 | 0.3069 | 0.8403 | -1.2048 |
| YRI | HIST2 | 149467608 | 0      | 0      | 0       |
| YRI | HIST2 | 149472608 | 0      | 0      | 0       |
| YRI | HIST2 | 149477608 | 0      | 0      | 0       |
| YRI | HIST2 | 149482608 | 0      | 0      | 0       |
| YRI | HIST2 | 149487608 | 0      | 0      | 0       |
| YRI | HIST2 | 149492608 | 0      | 0      | 0       |
| YRI | HIST2 | 149497608 | 0      | 0      | 0       |
| YRI | HIST2 | 149502608 | 0      | 0      | 0       |
| YRI | HIST2 | 149507608 | 0.4018 | 0.5042 | -0.3218 |
| YRI | HIST2 | 149512608 | 0.6674 | 2.0167 | -1.6133 |
| YRI | HIST2 | 149517608 | 0.4991 | 2.0167 | -1.8145 |
| YRI | HIST2 | 149522608 | 0.2335 | 0.5042 | -0.8507 |
| YRI | HIST2 | 149527608 | 0.2339 | 0.5042 | -0.8495 |
| YRI | HIST2 | 149532608 | 0.2339 | 0.5042 | -0.8495 |
| YRI | HIST2 | 149537608 | 0      | 0      | 0       |
| YRI | HIST2 | 149542608 | 0      | 0      | 0       |
| YRI | HIST2 | 149547608 | 0      | 0      | 0       |
| YRI | HIST2 | 149552608 | 0      | 0      | 0       |
| YRI | HIST2 | 149557608 | 0      | 0      | 0       |
| YRI | HIST2 | 149562608 | 0      | 0      | 0       |
| YRI | HIST2 | 149567608 | 0.5133 | 0.5042 | 0.0286  |
| YRI | HIST2 | 149572608 | 1.1098 | 1.6806 | -0.7853 |
| YRI | HIST2 | 149577608 | 0.9289 | 1.6806 | -1.0341 |
| YRI | HIST2 | 149582608 | 2.3949 | 5.0419 | -1.4748 |
| YRI | HIST2 | 149587608 | 2.5004 | 5.5461 | -1.5597 |
| YRI | HIST2 | 149592608 | 1.2221 | 2.3529 | -1.197  |
| YRI | HIST2 | 149597608 | 2.5434 | 3.0251 | -0.4155 |
| YRI | HIST2 | 149602608 | 5.5997 | 6.0502 | -0.2134 |
| YRI | HIST2 | 149607608 | 5.8919 | 6.8906 | -0.4208 |
| YRI | HIST2 | 149612608 | 2.6056 | 3.6974 | -0.7958 |
| YRI | HIST2 | 149617608 | 0.5543 | 1.1764 | -1.1127 |
| YRI | HIST2 | 149622608 | 0      | 0      | 0       |
| YRI | HIST2 | 149627608 | 0.0093 | 0.1681 | -0.944  |
| YRI | HIST2 | 149632608 | 0.3282 | 0.6722 | -0.9006 |

## 2\_TajimasD\_data

|     |       |           |         |         |         |
|-----|-------|-----------|---------|---------|---------|
| YRI | HIST2 | 149637608 | 3.1238  | 2.1848  | 1.0543  |
| YRI | HIST2 | 149642608 | 4.4903  | 4.7057  | -0.1275 |
| YRI | HIST2 | 149647608 | 8.5788  | 9.2434  | -0.2139 |
| YRI | HIST2 | 149652608 | 9.4155  | 10.4199 | -0.2891 |
| YRI | HIST2 | 149657608 | 5.7279  | 7.2267  | -0.6048 |
| YRI | HIST2 | 149662608 | 7.8662  | 8.067   | -0.0733 |
| YRI | HIST2 | 149667608 | 10.9669 | 13.613  | -0.5922 |
| YRI | HIST2 | 149672608 | 10.1832 | 14.1172 | -0.8506 |
| YRI | HIST2 | 149677608 | 6.6127  | 9.7476  | -0.9603 |
| YRI | HIST2 | 149682608 | 4.4768  | 9.0754  | -1.5053 |
| YRI | HIST2 | 149687608 | 2.5728  | 8.4031  | -2.0491 |
| YRI | HIST2 | 149692608 | 2.9951  | 6.3864  | -1.5306 |
| YRI | HIST2 | 149697608 | 4.7508  | 7.2267  | -0.9991 |
| YRI | HIST2 | 149702608 | 8.2867  | 11.4282 | -0.8294 |
| YRI | HIST2 | 149707608 | 10.0844 | 13.2769 | -0.7317 |
| YRI | HIST2 | 149712608 | 6.965   | 10.924  | -1.0904 |
| YRI | HIST2 | 149717608 | 7.7259  | 11.7644 | -1.0375 |
| YRI | HIST2 | 149722608 | 9.2603  | 12.6047 | -0.8051 |
| YRI | HIST2 | 149727608 | 8.845   | 13.1089 | -0.9891 |
| YRI | HIST2 | 149732608 | 7.7605  | 12.6047 | -1.1661 |
| YRI | HIST2 | 149737608 | 4.3377  | 7.8989  | -1.3248 |
| YRI | HIST2 | 149742608 | 4.2459  | 6.2183  | -0.9118 |
| YRI | HIST2 | 149747608 | 6.9642  | 7.5628  | -0.2317 |
| YRI | HIST2 | 149752608 | 6.0807  | 7.5628  | -0.5738 |
| YRI | HIST2 | 149757608 | 6.3891  | 9.9157  | -1.0633 |
| YRI | HIST2 | 149762608 | 6.0755  | 10.756  | -1.308  |
| YRI | HIST2 | 149767608 | 3.2155  | 9.2434  | -1.9399 |
| YRI | HIST2 | 149772608 | 5.4029  | 10.924  | -1.5206 |
| YRI | HIST2 | 149777608 | 6.5211  | 11.7644 | -1.347  |
| YRI | HIST2 | 149782608 | 4.9324  | 13.2769 | -1.9124 |
| YRI | HIST2 | 149787608 | 4.1088  | 11.5963 | -1.9498 |
| YRI | HIST2 | 149792608 | 2.1767  | 5.2099  | -1.6418 |
| YRI | HIST2 | 149797608 | 0.4072  | 1.0084  | -1.1986 |
| YRI | HIST2 | 149802608 | 0       | 0       | 0       |
| YRI | HIST2 | 149807608 | 0       | 0       | 0       |
| YRI | HIST2 | 149812608 | 2.8529  | 5.2099  | -1.2758 |
| YRI | HIST2 | 149817608 | 5.0549  | 8.5712  | -1.2135 |
| YRI | HIST2 | 149822608 | 2.6837  | 3.5293  | -0.6411 |
| YRI | HIST2 | 149827608 | 0.4817  | 0.1681  | 1.8643  |
| YRI | HIST2 | 149832608 | 0       | 0       | 0       |
| YRI | HIST2 | 149837608 | 0.0183  | 0.1681  | -0.8905 |
| YRI | HIST2 | 149842608 | 1.3352  | 3.0251  | -1.4578 |
| YRI | HIST2 | 149847608 | 4.1965  | 9.4115  | -1.6505 |
| YRI | HIST2 | 149852608 | 5.2333  | 13.445  | -1.8597 |
| YRI | HIST2 | 149857608 | 4.0767  | 11.9324 | -1.9914 |
| YRI | HIST2 | 149862608 | 5.5506  | 11.7644 | -1.5964 |
| YRI | HIST2 | 149867608 | 7.5872  | 12.4366 | -1.1823 |
| YRI | HIST2 | 149872608 | 5.9272  | 10.924  | -1.3762 |
| YRI | HIST2 | 149877608 | 7.021   | 11.4282 | -1.1635 |

## 2\_TajimasD\_data

|     |       |           |         |         |         |
|-----|-------|-----------|---------|---------|---------|
| YRI | HIST2 | 149882608 | 8.3506  | 11.5963 | -0.8452 |
| YRI | HIST2 | 149887608 | 5.7786  | 11.9324 | -1.56   |
| YRI | HIST2 | 149892608 | 5.2319  | 12.9408 | -1.8102 |
| YRI | HIST2 | 149897608 | 4.7192  | 13.1089 | -1.9461 |
| YRI | HIST2 | 149902608 | 3.8641  | 11.4282 | -1.9969 |
| YRI | HIST2 | 149907608 | 6.6539  | 11.5963 | -1.287  |
| YRI | HIST2 | 149912608 | 6.3756  | 12.1005 | -1.4323 |
| YRI | HIST2 | 149917608 | 5.7244  | 12.4366 | -1.6364 |
| YRI | HIST2 | 149922608 | 7.5794  | 14.1172 | -1.4137 |
| YRI | HIST2 | 149927608 | 8.7634  | 13.9492 | -1.1341 |
| YRI | HIST2 | 149932608 | 9.4821  | 13.445  | -0.8975 |
| YRI | HIST2 | 149937608 | 8.733   | 12.1005 | -0.8425 |
| YRI | HIST2 | 149942608 | 5.9704  | 9.0754  | -1.0164 |
| YRI | HIST2 | 149947608 | 4.4918  | 8.4031  | -1.3747 |
| YRI | HIST2 | 149952608 | 8.1726  | 11.5963 | -0.8916 |
| YRI | HIST2 | 149957608 | 7.4743  | 11.0921 | -0.9823 |
| YRI | HIST2 | 149962608 | 4.4682  | 8.9073  | -1.4785 |
| YRI | HIST2 | 149967608 | 6.6061  | 9.9157  | -0.9978 |
| YRI | HIST2 | 149972608 | 6.8847  | 9.4115  | -0.7997 |
| YRI | HIST2 | 149977608 | 6.8085  | 9.5795  | -0.8627 |
| YRI | HIST2 | 149982608 | 9.3457  | 12.2685 | -0.7218 |
| YRI | HIST2 | 149987608 | 9.6175  | 12.1005 | -0.6212 |
| YRI | HIST2 | 149992608 | 9.0346  | 13.445  | -0.9988 |
| YRI | HIST2 | 149997608 | 13.5133 | 15.4617 | -0.3864 |
| YRI | HIST2 | 150002608 | 13.5325 | 13.613  | -0.018  |
| YRI | HIST2 | 150007608 | 11.3461 | 15.2937 | -0.791  |
| YRI | HIST2 | 150012608 | 15.6615 | 17.6465 | -0.3469 |
| YRI | HIST2 | 150017608 | 15.5687 | 15.6298 | -0.012  |
| YRI | HIST2 | 150022608 | 13.3697 | 15.4617 | -0.4148 |
| YRI | HIST2 | 150027608 | 11.7443 | 13.9492 | -0.4822 |
| YRI | HIST2 | 150032608 | 8.6696  | 11.0921 | -0.6577 |
| YRI | HIST2 | 150037608 | 8.56    | 13.1089 | -1.0552 |
| YRI | HIST2 | 150042608 | 11.8235 | 14.7895 | -0.6136 |
| YRI | HIST2 | 150047608 | 11.6029 | 14.7895 | -0.6592 |
| YRI | HIST2 | 150052608 | 7.881   | 13.1089 | -1.2127 |
| YRI | HIST2 | 150057608 | 7.0524  | 12.4366 | -1.3127 |
| YRI | HIST2 | 150062608 | 8.8031  | 13.1089 | -0.9988 |
| YRI | HIST2 | 150067608 | 8.8995  | 12.4366 | -0.8623 |
| YRI | HIST2 | 150072608 | 10.2111 | 14.4534 | -0.897  |
| YRI | HIST2 | 150077608 | 12.0651 | 16.8062 | -0.8681 |
| YRI | HIST2 | 150082608 | 10.4679 | 15.2937 | -0.9669 |
| YRI | HIST2 | 150087608 | 13.0869 | 15.4617 | -0.4709 |
| YRI | HIST2 | 150092608 | 14.5688 | 15.6298 | -0.2082 |
| YRI | HIST2 | 150097608 | 11.3238 | 13.9492 | -0.5742 |
| YRI | HIST2 | 150102608 | 11.5122 | 15.1256 | -0.7317 |
| YRI | HIST2 | 150107608 | 11.9195 | 16.8062 | -0.8948 |
| YRI | HIST2 | 150112608 | 9.1169  | 14.7895 | -1.1735 |
| YRI | HIST2 | 150117608 | 7.3768  | 13.7811 | -1.4168 |
| YRI | HIST2 | 150122608 | 8.5138  | 15.2937 | -1.3585 |

2\_TajimasD\_data

|     |       |           |         |         |         |
|-----|-------|-----------|---------|---------|---------|
| YRI | HIST2 | 150127608 | 9.9391  | 14.9575 | -1.0271 |
| YRI | HIST2 | 150132608 | 11.0102 | 15.6298 | -0.9066 |
| YRI | HIST2 | 150137608 | 12.9711 | 17.6465 | -0.817  |
| YRI | HIST2 | 150142608 | 11.6407 | 15.9659 | -0.8318 |
| YRI | HIST2 | 150147608 | 7.9108  | 11.9324 | -1.0195 |
| YRI | HIST2 | 150152608 | 10.1871 | 13.445  | -0.7378 |
| YRI | HIST2 | 150157608 | 16.8299 | 19.1591 | -0.3761 |
| YRI | HIST2 | 150162608 | 16.2272 | 18.823  | -0.4263 |
| YRI | HIST2 | 150167608 | 13.501  | 16.134  | -0.5013 |
| YRI | HIST2 | 150172608 | 12.8102 | 15.9659 | -0.6069 |
| YRI | HIST2 | 150177608 | 11.3844 | 14.7895 | -0.7044 |
| YRI | HIST2 | 150182608 | 11.6681 | 14.1172 | -0.5296 |
| YRI | HIST2 | 150187608 | 9.2865  | 12.1005 | -0.704  |
| YRI | HIST2 | 150192608 | 8.856   | 11.0921 | -0.6071 |
| YRI | HIST2 | 150197608 | 10.6242 | 10.924  | -0.0826 |
| YRI | HIST2 | 150202608 | 11.4618 | 11.2602 | 0.054   |
| YRI | HIST2 | 150207608 | 13.026  | 13.9492 | -0.2019 |
| YRI | HIST2 | 150212608 | 13.3002 | 14.7895 | -0.3081 |
| YRI | HIST2 | 150217608 | 12.1107 | 13.1089 | -0.2315 |
| YRI | HIST2 | 150222608 | 9.0517  | 10.4199 | -0.3939 |
| YRI | HIST2 | 150227608 | 4.478   | 8.5712  | -1.4126 |
| YRI | HIST2 | 150232608 | 3.2434  | 7.5628  | -1.6722 |
| YRI | HIST2 | 150237608 | 3.6382  | 6.7225  | -1.329  |
| YRI | HIST2 | 150242608 | 4.6251  | 9.2434  | -1.4863 |
| YRI | HIST2 | 150247608 | 6.5472  | 11.0921 | -1.234  |
| YRI | HIST2 | 150252608 | 6.7318  | 10.4199 | -1.0617 |
| YRI | HIST2 | 150257608 | 10.2802 | 10.5879 | -0.0873 |
| YRI | HIST2 | 150262608 | 14.7817 | 12.9408 | 0.4323  |
| YRI | HIST2 | 150267608 | 18.4065 | 16.6382 | 0.3269  |
| YRI | HIST2 | 150272608 | 16.6557 | 16.9743 | -0.0578 |
| YRI | HIST2 | 150277608 | 13.4815 | 15.2937 | -0.3631 |
| YRI | HIST2 | 150282608 | 12.86   | 14.6214 | -0.3684 |
| YRI | HIST2 | 150287608 | 10.99   | 13.1089 | -0.4915 |
| YRI | HIST2 | 150292608 | 10.3046 | 11.9324 | -0.4126 |
| YRI | HIST2 | 150297608 | 9.3833  | 11.9324 | -0.6462 |
| YRI | HIST2 | 150302608 | 10.5637 | 11.9324 | -0.347  |
| YRI | HIST2 | 150307608 | 12.6879 | 14.6214 | -0.4044 |
| YRI | HIST2 | 150312608 | 12.7388 | 13.613  | -0.1957 |
| YRI | HIST2 | 150317608 | 15.1552 | 13.7811 | 0.304   |
| YRI | HIST2 | 150322608 | 13.4792 | 15.2937 | -0.3636 |
| YRI | HIST2 | 150327608 | 11.8046 | 14.2853 | -0.5304 |
| YRI | HIST2 | 150332608 | 12.2157 | 13.9492 | -0.3791 |
| YRI | HIST2 | 150337608 | 10.6826 | 12.6047 | -0.4627 |
| YRI | HIST2 | 150342608 | 11.9996 | 12.1005 | -0.0252 |
| YRI | HIST2 | 150347608 | 10.1839 | 10.924  | -0.2038 |
| CEU | HIST2 | 149358262 | 5.6349  | 5.6286  | 0.0032  |
| CEU | HIST2 | 149363262 | 5.699   | 4.9463  | 0.4293  |
| CEU | HIST2 | 149368262 | 3.5393  | 3.5818  | -0.032  |
| CEU | HIST2 | 149373262 | 2.9417  | 4.7757  | -1.0786 |

## 2\_TajimasD\_data

|     |       |           |        |        |         |
|-----|-------|-----------|--------|--------|---------|
| CEU | HIST2 | 149378262 | 3.5661 | 5.1169 | -0.8584 |
| CEU | HIST2 | 149383262 | 4.4593 | 4.4346 | 0.0155  |
| CEU | HIST2 | 149388262 | 5.8396 | 5.2874 | 0.2969  |
| CEU | HIST2 | 149393262 | 5.9612 | 5.6286 | 0.1692  |
| CEU | HIST2 | 149398262 | 4.65   | 5.458  | -0.4224 |
| CEU | HIST2 | 149403262 | 5.6529 | 5.9697 | -0.1529 |
| CEU | HIST2 | 149408262 | 5.0012 | 4.4346 | 0.3555  |
| CEU | HIST2 | 149413262 | 4.7126 | 3.4112 | 1.0221  |
| CEU | HIST2 | 149418262 | 4.449  | 3.2407 | 0.9908  |
| CEU | HIST2 | 149423262 | 1.9637 | 1.8762 | 0.1114  |
| CEU | HIST2 | 149428262 | 2.3816 | 2.8996 | -0.4659 |
| CEU | HIST2 | 149433262 | 1.7838 | 2.2173 | -0.4843 |
| CEU | HIST2 | 149438262 | 0.0101 | 0.1706 | -0.9534 |
| CEU | HIST2 | 149443262 | 0      | 0      | 0       |
| CEU | HIST2 | 149448262 | 0.08   | 0.5117 | -1.3539 |
| CEU | HIST2 | 149453262 | 0.1979 | 1.0234 | -1.6403 |
| CEU | HIST2 | 149458262 | 0.128  | 0.6822 | -1.4472 |
| CEU | HIST2 | 149463262 | 0.0101 | 0.1706 | -0.9534 |
| CEU | HIST2 | 149468262 | 0      | 0      | 0       |
| CEU | HIST2 | 149473262 | 0      | 0      | 0       |
| CEU | HIST2 | 149478262 | 0      | 0      | 0       |
| CEU | HIST2 | 149483262 | 0      | 0      | 0       |
| CEU | HIST2 | 149488262 | 0      | 0      | 0       |
| CEU | HIST2 | 149493262 | 0      | 0      | 0       |
| CEU | HIST2 | 149498262 | 0      | 0      | 0       |
| CEU | HIST2 | 149503262 | 0      | 0      | 0       |
| CEU | HIST2 | 149508262 | 0.1363 | 0.5117 | -1.1774 |
| CEU | HIST2 | 149513262 | 0.4605 | 1.1939 | -1.3069 |
| CEU | HIST2 | 149518262 | 0.3243 | 0.6822 | -0.9346 |
| CEU | HIST2 | 149523262 | 0      | 0      | 0       |
| CEU | HIST2 | 149528262 | 0.0101 | 0.1706 | -0.9534 |
| CEU | HIST2 | 149533262 | 0.0101 | 0.1706 | -0.9534 |
| CEU | HIST2 | 149538262 | 0      | 0      | 0       |
| CEU | HIST2 | 149543262 | 0      | 0      | 0       |
| CEU | HIST2 | 149548262 | 0      | 0      | 0       |
| CEU | HIST2 | 149553262 | 0      | 0      | 0       |
| CEU | HIST2 | 149558262 | 0      | 0      | 0       |
| CEU | HIST2 | 149563262 | 0      | 0      | 0       |
| CEU | HIST2 | 149568262 | 0.6005 | 0.3411 | 1.0399  |
| CEU | HIST2 | 149573262 | 0.885  | 0.6822 | 0.5296  |
| CEU | HIST2 | 149578262 | 0.3939 | 1.0234 | -1.2508 |
| CEU | HIST2 | 149583262 | 2.8182 | 3.2407 | -0.3464 |
| CEU | HIST2 | 149588262 | 3.6906 | 3.0701 | 0.5323  |
| CEU | HIST2 | 149593262 | 2.1459 | 2.0467 | 0.118   |
| CEU | HIST2 | 149598262 | 3.4073 | 3.2407 | 0.1366  |
| CEU | HIST2 | 149603262 | 6.8606 | 4.9463 | 1.0917  |
| CEU | HIST2 | 149608262 | 7.033  | 4.6052 | 1.474   |
| CEU | HIST2 | 149613262 | 2.7941 | 1.7056 | 1.4908  |
| CEU | HIST2 | 149618262 | 0.3785 | 0.3411 | 0.1499  |



## 2\_TajimasD\_data

|     |       |           |         |         |         |
|-----|-------|-----------|---------|---------|---------|
| CEU | HIST2 | 149623262 | 0       | 0       | 0       |
| CEU | HIST2 | 149628262 | 0.0301  | 0.1706  | -0.8346 |
| CEU | HIST2 | 149633262 | 0.0503  | 0.5117  | -1.4471 |
| CEU | HIST2 | 149638262 | 2.4197  | 1.8762  | 0.692   |
| CEU | HIST2 | 149643262 | 4.7056  | 3.9229  | 0.5459  |
| CEU | HIST2 | 149648262 | 7.9542  | 6.6519  | 0.5702  |
| CEU | HIST2 | 149653262 | 8.2068  | 6.3108  | 0.8705  |
| CEU | HIST2 | 149658262 | 4.5382  | 3.9229  | 0.4292  |
| CEU | HIST2 | 149663262 | 4.7786  | 5.9697  | -0.5748 |
| CEU | HIST2 | 149668262 | 5.228   | 10.0632 | -1.447  |
| CEU | HIST2 | 149673262 | 5.4397  | 9.2104  | -1.2253 |
| CEU | HIST2 | 149678262 | 4.8332  | 6.1402  | -0.615  |
| CEU | HIST2 | 149683262 | 2.4888  | 4.4346  | -1.2209 |
| CEU | HIST2 | 149688262 | 0.9285  | 3.2407  | -1.896  |
| CEU | HIST2 | 149693262 | 1.8536  | 3.7524  | -1.3756 |
| CEU | HIST2 | 149698262 | 3.4795  | 5.7991  | -1.1489 |
| CEU | HIST2 | 149703262 | 4.7829  | 6.8225  | -0.8727 |
| CEU | HIST2 | 149708262 | 7.6066  | 6.9931  | 0.2567  |
| CEU | HIST2 | 149713262 | 10.7902 | 8.3576  | 0.8647  |
| CEU | HIST2 | 149718262 | 10.9326 | 8.187   | 0.9947  |
| CEU | HIST2 | 149723262 | 7.2799  | 6.3108  | 0.4449  |
| CEU | HIST2 | 149728262 | 6.945   | 6.3108  | 0.2912  |
| CEU | HIST2 | 149733262 | 6.1517  | 5.7991  | 0.1746  |
| CEU | HIST2 | 149738262 | 2.6797  | 3.5818  | -0.6799 |
| CEU | HIST2 | 149743262 | 2.2533  | 2.729   | -0.4496 |
| CEU | HIST2 | 149748262 | 4.2958  | 3.5818  | 0.5381  |
| CEU | HIST2 | 149753262 | 3.5908  | 3.4112  | 0.1411  |
| CEU | HIST2 | 149758262 | 1.8874  | 3.5818  | -1.2771 |
| CEU | HIST2 | 149763262 | 2.1659  | 5.1169  | -1.6334 |
| CEU | HIST2 | 149768262 | 2.5351  | 5.2874  | -1.4799 |
| CEU | HIST2 | 149773262 | 3.7594  | 6.3108  | -1.1714 |
| CEU | HIST2 | 149778262 | 5.0441  | 7.5047  | -0.9654 |
| CEU | HIST2 | 149783262 | 5.1115  | 7.8459  | -1.0301 |
| CEU | HIST2 | 149788262 | 3.2696  | 6.1402  | -1.3508 |
| CEU | HIST2 | 149793262 | 1.1981  | 2.2173  | -1.1386 |
| CEU | HIST2 | 149798262 | 0       | 0       | 0       |
| CEU | HIST2 | 149803262 | 0       | 0       | 0       |
| CEU | HIST2 | 149808262 | 0       | 0       | 0       |
| CEU | HIST2 | 149813262 | 1.7827  | 2.3879  | -0.6373 |
| CEU | HIST2 | 149818262 | 2.7071  | 4.2641  | -1.0107 |
| CEU | HIST2 | 149823262 | 1.4236  | 2.0467  | -0.7414 |
| CEU | HIST2 | 149828262 | 0.4993  | 0.1706  | 1.9525  |
| CEU | HIST2 | 149833262 | 0       | 0       | 0       |
| CEU | HIST2 | 149838262 | 0       | 0       | 0       |
| CEU | HIST2 | 149843262 | 1.2872  | 2.2173  | -1.0391 |
| CEU | HIST2 | 149848262 | 2.3686  | 4.4346  | -1.2963 |
| CEU | HIST2 | 149853262 | 2.053   | 5.1169  | -1.6959 |
| CEU | HIST2 | 149858262 | 3.0596  | 6.9931  | -1.6458 |
| CEU | HIST2 | 149863262 | 4.548   | 7.8459  | -1.2424 |

## 2\_TajimasD\_data

|     |       |           |         |        |         |
|-----|-------|-----------|---------|--------|---------|
| CEU | HIST2 | 149868262 | 4.9638  | 8.3576 | -1.2064 |
| CEU | HIST2 | 149873262 | 4.0303  | 6.4814 | -1.0986 |
| CEU | HIST2 | 149878262 | 3.7207  | 6.1402 | -1.1385 |
| CEU | HIST2 | 149883262 | 2.7013  | 5.2874 | -1.3906 |
| CEU | HIST2 | 149888262 | 2.603   | 3.5818 | -0.7377 |
| CEU | HIST2 | 149893262 | 3.8856  | 5.6286 | -0.8866 |
| CEU | HIST2 | 149898262 | 3.3659  | 5.6286 | -1.1509 |
| CEU | HIST2 | 149903262 | 4.126   | 5.9697 | -0.8898 |
| CEU | HIST2 | 149908262 | 3.4735  | 5.2874 | -0.9753 |
| CEU | HIST2 | 149913262 | 1.2511  | 3.5818 | -1.7566 |
| CEU | HIST2 | 149918262 | 2.2224  | 4.2641 | -1.3254 |
| CEU | HIST2 | 149923262 | 3.7423  | 5.2874 | -0.8308 |
| CEU | HIST2 | 149928262 | 3.8543  | 5.7991 | -0.9632 |
| CEU | HIST2 | 149933262 | 2.45    | 5.458  | -1.5725 |
| CEU | HIST2 | 149938262 | 2.0338  | 4.4346 | -1.5063 |
| CEU | HIST2 | 149943262 | 2.7784  | 3.7524 | -0.7056 |
| CEU | HIST2 | 149948262 | 2.1206  | 4.0935 | -1.3266 |
| CEU | HIST2 | 149953262 | 2.8042  | 5.6286 | -1.4367 |
| CEU | HIST2 | 149958262 | 2.2919  | 4.7757 | -1.4608 |
| CEU | HIST2 | 149963262 | 1.2185  | 2.729  | -1.4277 |
| CEU | HIST2 | 149968262 | 2.1701  | 3.2407 | -0.8779 |
| CEU | HIST2 | 149973262 | 2.2014  | 3.9229 | -1.2007 |
| CEU | HIST2 | 149978262 | 2.2138  | 4.4346 | -1.3934 |
| CEU | HIST2 | 149983262 | 3.5459  | 5.6286 | -1.0594 |
| CEU | HIST2 | 149988262 | 4.0167  | 5.7991 | -0.8828 |
| CEU | HIST2 | 149993262 | 5.4251  | 7.1636 | -0.7117 |
| CEU | HIST2 | 149998262 | 9.7349  | 8.6987 | 0.355   |
| CEU | HIST2 | 150003262 | 8.577   | 6.6519 | 0.8428  |
| CEU | HIST2 | 150008262 | 7.9959  | 7.5047 | 0.1927  |
| CEU | HIST2 | 150013262 | 11.0676 | 9.7221 | 0.4158  |
| CEU | HIST2 | 150018262 | 10.0734 | 8.3576 | 0.6099  |
| CEU | HIST2 | 150023262 | 8.5648  | 7.3342 | 0.4931  |
| CEU | HIST2 | 150028262 | 5.368   | 5.9697 | -0.2904 |
| CEU | HIST2 | 150033262 | 2.2319  | 4.4346 | -1.382  |
| CEU | HIST2 | 150038262 | 2.8551  | 5.6286 | -1.4108 |
| CEU | HIST2 | 150043262 | 4.2235  | 6.6519 | -1.0632 |
| CEU | HIST2 | 150048262 | 4.3154  | 5.2874 | -0.5226 |
| CEU | HIST2 | 150053262 | 2.8961  | 4.4346 | -0.9653 |
| CEU | HIST2 | 150058262 | 2.4185  | 4.6052 | -1.3276 |
| CEU | HIST2 | 150063262 | 3.2917  | 5.1169 | -1.0103 |
| CEU | HIST2 | 150068262 | 2.2927  | 3.4112 | -0.8785 |
| CEU | HIST2 | 150073262 | 5.6081  | 5.6286 | -0.0104 |
| CEU | HIST2 | 150078262 | 7.1513  | 7.8459 | -0.2617 |
| CEU | HIST2 | 150083262 | 3.3799  | 5.458  | -1.0864 |
| CEU | HIST2 | 150088262 | 3.6172  | 6.9931 | -1.4125 |
| CEU | HIST2 | 150093262 | 4.3137  | 6.4814 | -0.9716 |
| CEU | HIST2 | 150098262 | 3.5584  | 4.6052 | -0.6356 |
| CEU | HIST2 | 150103262 | 4.5578  | 6.6519 | -0.9168 |
| CEU | HIST2 | 150108262 | 6.4395  | 7.1636 | -0.2964 |

## 2\_TajimasD\_data

|     |       |           |         |         |         |
|-----|-------|-----------|---------|---------|---------|
| CEU | HIST2 | 150113262 | 5.1983  | 5.6286  | -0.2189 |
| CEU | HIST2 | 150118262 | 3.0588  | 4.9463  | -1.0764 |
| CEU | HIST2 | 150123262 | 3.6353  | 6.3108  | -1.2284 |
| CEU | HIST2 | 150128262 | 5.9878  | 8.5281  | -0.8863 |
| CEU | HIST2 | 150133262 | 6.5949  | 9.2104  | -0.8499 |
| CEU | HIST2 | 150138262 | 6.6069  | 11.2571 | -1.253  |
| CEU | HIST2 | 150143262 | 6.4964  | 9.3809  | -0.9215 |
| CEU | HIST2 | 150148262 | 4.8918  | 6.3108  | -0.6515 |
| CEU | HIST2 | 150153262 | 3.6945  | 7.3342  | -1.4583 |
| CEU | HIST2 | 150158262 | 4.7576  | 9.2104  | -1.4469 |
| CEU | HIST2 | 150163262 | 9.1387  | 9.5515  | -0.1297 |
| CEU | HIST2 | 150168262 | 10.4315 | 8.187   | 0.8131  |
| CEU | HIST2 | 150173262 | 7.3634  | 6.6519  | 0.3115  |
| CEU | HIST2 | 150178262 | 6.643   | 5.2874  | 0.7289  |
| CEU | HIST2 | 150183262 | 7.6821  | 6.1402  | 0.7256  |
| CEU | HIST2 | 150188262 | 6.0486  | 6.4814  | -0.194  |
| CEU | HIST2 | 150193262 | 5.3088  | 5.6286  | -0.1627 |
| CEU | HIST2 | 150198262 | 8.4269  | 6.6519  | 0.7771  |
| CEU | HIST2 | 150203262 | 9.3395  | 7.8459  | 0.5627  |
| CEU | HIST2 | 150208262 | 9.1703  | 8.3576  | 0.2889  |
| CEU | HIST2 | 150213262 | 10.2542 | 7.5047  | 1.0788  |
| CEU | HIST2 | 150218262 | 8.2453  | 5.9697  | 1.0982  |
| CEU | HIST2 | 150223262 | 5.7642  | 5.7991  | -0.0173 |
| CEU | HIST2 | 150228262 | 3.3274  | 4.4346  | -0.6947 |
| CEU | HIST2 | 150233262 | 2.6514  | 3.0701  | -0.3592 |
| CEU | HIST2 | 150238262 | 3.7153  | 3.7524  | -0.0269 |
| CEU | HIST2 | 150243262 | 3.3667  | 4.4346  | -0.67   |
| CEU | HIST2 | 150248262 | 5.3133  | 4.6052  | 0.4299  |
| CEU | HIST2 | 150253262 | 6.5502  | 5.9697  | 0.2802  |
| CEU | HIST2 | 150258262 | 8.8621  | 8.0164  | 0.3124  |
| CEU | HIST2 | 150263262 | 13.2997 | 8.0164  | 1.9514  |
| CEU | HIST2 | 150268262 | 18.4651 | 10.4043 | 2.3384  |
| CEU | HIST2 | 150273262 | 16.718  | 11.7688 | 1.279   |
| CEU | HIST2 | 150278262 | 14.8289 | 11.0866 | 1.0229  |
| CEU | HIST2 | 150283262 | 15.4127 | 10.5749 | 1.3822  |
| CEU | HIST2 | 150288262 | 12.5706 | 8.3576  | 1.4976  |
| CEU | HIST2 | 150293262 | 10.4645 | 7.8459  | 0.9865  |
| CEU | HIST2 | 150298262 | 6.9238  | 6.6519  | 0.119   |
| CEU | HIST2 | 150303262 | 8.5154  | 7.5047  | 0.3965  |
| CEU | HIST2 | 150308262 | 10.4952 | 9.5515  | 0.2965  |
| CEU | HIST2 | 150313262 | 9.9742  | 9.5515  | 0.1328  |
| CEU | HIST2 | 150318262 | 14.0132 | 10.4043 | 1.0469  |
| CEU | HIST2 | 150323262 | 14.1021 | 10.4043 | 1.0727  |
| CEU | HIST2 | 150328262 | 13.0786 | 9.5515  | 1.1081  |
| CEU | HIST2 | 150333262 | 11.687  | 8.5281  | 1.1022  |
| CEU | HIST2 | 150338262 | 8.8754  | 8.3576  | 0.1841  |
| CEU | HIST2 | 150343262 | 10.6739 | 9.0398  | 0.5403  |
| CEU | HIST2 | 150348262 | 10.3913 | 8.6987  | 0.5799  |
| CEU | HIST2 | 150353262 | 12.5539 | 9.7221  | 0.8751  |

## 2\_TajimasD\_data

|     |       |           |        |        |         |
|-----|-------|-----------|--------|--------|---------|
| CHB | HIST2 | 149358262 | 5.1121 | 4.7436 | 0.2174  |
| CHB | HIST2 | 149363262 | 5.0579 | 4.5742 | 0.2945  |
| CHB | HIST2 | 149368262 | 2.8193 | 4.5742 | -1.0686 |
| CHB | HIST2 | 149373262 | 1.9088 | 4.913  | -1.7184 |
| CHB | HIST2 | 149378262 | 2.6528 | 4.2354 | -1.0303 |
| CHB | HIST2 | 149383262 | 3.6038 | 4.2354 | -0.4112 |
| CHB | HIST2 | 149388262 | 4.5578 | 5.9295 | -0.6641 |
| CHB | HIST2 | 149393262 | 4.5998 | 5.2519 | -0.3517 |
| CHB | HIST2 | 149398262 | 3.9874 | 5.2519 | -0.682  |
| CHB | HIST2 | 149403262 | 4.6667 | 6.7766 | -0.9057 |
| CHB | HIST2 | 149408262 | 3.5174 | 4.7436 | -0.7233 |
| CHB | HIST2 | 149413262 | 4.3154 | 4.5742 | -0.1576 |
| CHB | HIST2 | 149418262 | 4.2381 | 4.913  | -0.386  |
| CHB | HIST2 | 149423262 | 1.3975 | 3.2189 | -1.4974 |
| CHB | HIST2 | 149428262 | 1.9442 | 3.8965 | -1.3655 |
| CHB | HIST2 | 149433262 | 1.5755 | 2.5412 | -0.9643 |
| CHB | HIST2 | 149438262 | 0.0097 | 0.1694 | -0.949  |
| CHB | HIST2 | 149443262 | 0      | 0      | 0       |
| CHB | HIST2 | 149448262 | 0.0386 | 0.5082 | -1.4741 |
| CHB | HIST2 | 149453262 | 0.1162 | 1.5247 | -2.0925 |
| CHB | HIST2 | 149458262 | 0.0873 | 1.1859 | -1.961  |
| CHB | HIST2 | 149463262 | 0.0097 | 0.1694 | -0.949  |
| CHB | HIST2 | 149468262 | 0      | 0      | 0       |
| CHB | HIST2 | 149473262 | 0      | 0      | 0       |
| CHB | HIST2 | 149478262 | 0      | 0      | 0       |
| CHB | HIST2 | 149483262 | 0      | 0      | 0       |
| CHB | HIST2 | 149488262 | 0      | 0      | 0       |
| CHB | HIST2 | 149493262 | 0      | 0      | 0       |
| CHB | HIST2 | 149498262 | 0      | 0      | 0       |
| CHB | HIST2 | 149503262 | 0      | 0      | 0       |
| CHB | HIST2 | 149508262 | 0.6372 | 0.6777 | -0.1059 |
| CHB | HIST2 | 149513262 | 0.9065 | 1.1859 | -0.4987 |
| CHB | HIST2 | 149518262 | 0.2694 | 0.5082 | -0.7496 |
| CHB | HIST2 | 149523262 | 0      | 0      | 0       |
| CHB | HIST2 | 149528262 | 0.2578 | 0.1694 | 0.5253  |
| CHB | HIST2 | 149533262 | 0.2578 | 0.1694 | 0.5253  |
| CHB | HIST2 | 149538262 | 0      | 0      | 0       |
| CHB | HIST2 | 149543262 | 0      | 0      | 0       |
| CHB | HIST2 | 149548262 | 0      | 0      | 0       |
| CHB | HIST2 | 149553262 | 0      | 0      | 0       |
| CHB | HIST2 | 149558262 | 0      | 0      | 0       |
| CHB | HIST2 | 149563262 | 0      | 0      | 0       |
| CHB | HIST2 | 149568262 | 0.4891 | 0.5082 | -0.06   |
| CHB | HIST2 | 149573262 | 0.9039 | 0.8471 | 0.1281  |
| CHB | HIST2 | 149578262 | 1.4257 | 1.1859 | 0.428   |
| CHB | HIST2 | 149583262 | 3.3082 | 3.3883 | -0.0631 |
| CHB | HIST2 | 149588262 | 3.0691 | 3.2189 | -0.1232 |
| CHB | HIST2 | 149593262 | 2.0525 | 1.6942 | 0.4917  |
| CHB | HIST2 | 149598262 | 3.8962 | 2.5412 | 1.3531  |

## 2\_TajimasD\_data

|     |       |           |        |        |         |
|-----|-------|-----------|--------|--------|---------|
| CHB | HIST2 | 149603262 | 7.5197 | 4.5742 | 1.7936  |
| CHB | HIST2 | 149608262 | 6.226  | 5.2519 | 0.5254  |
| CHB | HIST2 | 149613262 | 1.7679 | 2.5412 | -0.7722 |
| CHB | HIST2 | 149618262 | 0.4462 | 0.3388 | 0.4308  |
| CHB | HIST2 | 149623262 | 0      | 0      | 0       |
| CHB | HIST2 | 149628262 | 0.0097 | 0.1694 | -0.949  |
| CHB | HIST2 | 149633262 | 0.0194 | 0.3388 | -1.2812 |
| CHB | HIST2 | 149638262 | 2.8905 | 1.6942 | 1.6418  |
| CHB | HIST2 | 149643262 | 5.5243 | 4.5742 | 0.5785  |
| CHB | HIST2 | 149648262 | 7.8201 | 7.1154 | 0.2894  |
| CHB | HIST2 | 149653262 | 6.9298 | 5.9295 | 0.4843  |
| CHB | HIST2 | 149658262 | 3.3567 | 4.4048 | -0.6595 |
| CHB | HIST2 | 149663262 | 5.8429 | 5.0825 | 0.4222  |
| CHB | HIST2 | 149668262 | 8.4805 | 7.6237 | 0.3304  |
| CHB | HIST2 | 149673262 | 7.5292 | 8.1319 | -0.2191 |
| CHB | HIST2 | 149678262 | 4.7999 | 5.0825 | -0.1569 |
| CHB | HIST2 | 149683262 | 2.6722 | 4.7436 | -1.2219 |
| CHB | HIST2 | 149688262 | 2.3229 | 4.5742 | -1.3709 |
| CHB | HIST2 | 149693262 | 3.984  | 4.5742 | -0.3594 |
| CHB | HIST2 | 149698262 | 5.2147 | 4.913  | 0.1726  |
| CHB | HIST2 | 149703262 | 5.3695 | 6.4378 | -0.4803 |
| CHB | HIST2 | 149708262 | 6.9815 | 7.4543 | -0.1861 |
| CHB | HIST2 | 149713262 | 8.423  | 7.2848 | 0.4575  |
| CHB | HIST2 | 149718262 | 8.151  | 8.4708 | -0.112  |
| CHB | HIST2 | 149723262 | 5.9903 | 8.1319 | -0.7784 |
| CHB | HIST2 | 149728262 | 6.8462 | 8.4708 | -0.5687 |
| CHB | HIST2 | 149733262 | 5.8551 | 7.2848 | -0.5747 |
| CHB | HIST2 | 149738262 | 1.9042 | 4.066  | -1.4578 |
| CHB | HIST2 | 149743262 | 1.4142 | 2.7106 | -1.2284 |
| CHB | HIST2 | 149748262 | 3.7558 | 2.7106 | 0.9904  |
| CHB | HIST2 | 149753262 | 3.2829 | 3.0495 | 0.2007  |
| CHB | HIST2 | 149758262 | 1.308  | 6.2684 | -2.2846 |
| CHB | HIST2 | 149763262 | 1.973  | 6.2684 | -1.9783 |
| CHB | HIST2 | 149768262 | 2.1135 | 4.4048 | -1.4418 |
| CHB | HIST2 | 149773262 | 1.5264 | 6.0989 | -2.1584 |
| CHB | HIST2 | 149778262 | 1.016  | 5.2519 | -2.2846 |
| CHB | HIST2 | 149783262 | 0.8184 | 4.2354 | -2.2245 |
| CHB | HIST2 | 149788262 | 0.586  | 5.5907 | -2.5535 |
| CHB | HIST2 | 149793262 | 0.4026 | 3.3883 | -2.3513 |
| CHB | HIST2 | 149798262 | 0      | 0      | 0       |
| CHB | HIST2 | 149803262 | 0      | 0      | 0       |
| CHB | HIST2 | 149808262 | 0      | 0      | 0       |
| CHB | HIST2 | 149813262 | 0.4976 | 2.3718 | -1.9784 |
| CHB | HIST2 | 149818262 | 1.276  | 5.4213 | -2.1737 |
| CHB | HIST2 | 149823262 | 1.1445 | 3.2189 | -1.7054 |
| CHB | HIST2 | 149828262 | 0.3661 | 0.1694 | 1.1688  |
| CHB | HIST2 | 149833262 | 0      | 0      | 0       |
| CHB | HIST2 | 149838262 | 0      | 0      | 0       |
| CHB | HIST2 | 149843262 | 0.3553 | 2.3718 | -2.1286 |

## 2\_TajimasD\_data

|     |       |           |        |         |         |
|-----|-------|-----------|--------|---------|---------|
| CHB | HIST2 | 149848262 | 0.6599 | 5.4213  | -2.4967 |
| CHB | HIST2 | 149853262 | 0.8304 | 6.6072  | -2.5372 |
| CHB | HIST2 | 149858262 | 1.5658 | 6.4378  | -2.1906 |
| CHB | HIST2 | 149863262 | 1.7519 | 7.2848  | -2.224  |
| CHB | HIST2 | 149868262 | 0.9816 | 6.946   | -2.5036 |
| CHB | HIST2 | 149873262 | 0.7929 | 5.0825  | -2.3815 |
| CHB | HIST2 | 149878262 | 1.64   | 7.1154  | -2.2486 |
| CHB | HIST2 | 149883262 | 1.77   | 7.2848  | -2.2168 |
| CHB | HIST2 | 149888262 | 1.7063 | 5.4213  | -1.948  |
| CHB | HIST2 | 149893262 | 1.5336 | 6.946   | -2.2719 |
| CHB | HIST2 | 149898262 | 0.7034 | 7.1154  | -2.6332 |
| CHB | HIST2 | 149903262 | 1.8057 | 7.1154  | -2.1805 |
| CHB | HIST2 | 149908262 | 2.5933 | 7.9625  | -1.9897 |
| CHB | HIST2 | 149913262 | 1.4991 | 6.2684  | -2.1966 |
| CHB | HIST2 | 149918262 | 2.0129 | 7.1154  | -2.0954 |
| CHB | HIST2 | 149923262 | 3.1725 | 8.6402  | -1.8794 |
| CHB | HIST2 | 149928262 | 3.4715 | 9.9955  | -1.959  |
| CHB | HIST2 | 149933262 | 2.1807 | 10.3343 | -2.3734 |
| CHB | HIST2 | 149938262 | 2.0284 | 9.1484  | -2.3214 |
| CHB | HIST2 | 149943262 | 2.9916 | 8.4708  | -1.9181 |
| CHB | HIST2 | 149948262 | 2.1917 | 6.7766  | -1.9681 |
| CHB | HIST2 | 149953262 | 1.9785 | 8.1319  | -2.2366 |
| CHB | HIST2 | 149958262 | 1.5429 | 7.9625  | -2.3789 |
| CHB | HIST2 | 149963262 | 0.9977 | 6.0989  | -2.408  |
| CHB | HIST2 | 149968262 | 1.1218 | 5.5907  | -2.2801 |
| CHB | HIST2 | 149973262 | 1.3725 | 4.7436  | -1.9885 |
| CHB | HIST2 | 149978262 | 1.9992 | 5.2519  | -1.7543 |
| CHB | HIST2 | 149983262 | 2.4022 | 8.4708  | -2.1244 |
| CHB | HIST2 | 149988262 | 2.2322 | 9.9955  | -2.3312 |
| CHB | HIST2 | 149993262 | 3.7422 | 9.3178  | -1.7872 |
| CHB | HIST2 | 149998262 | 7.1146 | 10.8426 | -1.0375 |
| CHB | HIST2 | 150003262 | 5.8317 | 9.8261  | -1.2187 |
| CHB | HIST2 | 150008262 | 2.6309 | 9.8261  | -2.1953 |
| CHB | HIST2 | 150013262 | 1.7255 | 10.3343 | -2.5059 |
| CHB | HIST2 | 150018262 | 1.7489 | 8.3013  | -2.3369 |
| CHB | HIST2 | 150023262 | 1.7805 | 9.8261  | -2.4547 |
| CHB | HIST2 | 150028262 | 1.0042 | 8.3013  | -2.6025 |
| CHB | HIST2 | 150033262 | 1.0459 | 5.5907  | -2.3189 |
| CHB | HIST2 | 150038262 | 2.1462 | 6.6072  | -1.9593 |
| CHB | HIST2 | 150043262 | 1.9676 | 7.1154  | -2.114  |
| CHB | HIST2 | 150048262 | 0.636  | 6.7766  | -2.6359 |
| CHB | HIST2 | 150053262 | 0.9884 | 5.9295  | -2.3921 |
| CHB | HIST2 | 150058262 | 1.1485 | 6.0989  | -2.3368 |
| CHB | HIST2 | 150063262 | 0.7002 | 6.0989  | -2.5484 |
| CHB | HIST2 | 150068262 | 0.6389 | 5.2519  | -2.4879 |
| CHB | HIST2 | 150073262 | 1.2511 | 6.6072  | -2.3525 |
| CHB | HIST2 | 150078262 | 1.2467 | 7.1154  | -2.4101 |
| CHB | HIST2 | 150083262 | 0.9678 | 5.5907  | -2.3587 |
| CHB | HIST2 | 150088262 | 1.8403 | 6.2684  | -2.0394 |

## 2\_TajimasD\_data

|     |       |           |         |         |         |
|-----|-------|-----------|---------|---------|---------|
| CHB | HIST2 | 150093262 | 1.5445  | 6.6072  | -2.2236 |
| CHB | HIST2 | 150098262 | 0.9933  | 6.2684  | -2.4295 |
| CHB | HIST2 | 150103262 | 1.6092  | 7.7931  | -2.3372 |
| CHB | HIST2 | 150108262 | 1.8386  | 8.1319  | -2.2875 |
| CHB | HIST2 | 150113262 | 1.4287  | 6.6072  | -2.2745 |
| CHB | HIST2 | 150118262 | 1.4759  | 6.7766  | -2.2754 |
| CHB | HIST2 | 150123262 | 2.2237  | 7.6237  | -2.0824 |
| CHB | HIST2 | 150128262 | 2.5092  | 7.4543  | -1.9465 |
| CHB | HIST2 | 150133262 | 2.1606  | 8.3013  | -2.1901 |
| CHB | HIST2 | 150138262 | 2.089   | 10.1649 | -2.3873 |
| CHB | HIST2 | 150143262 | 2.676   | 9.4872  | -2.147  |
| CHB | HIST2 | 150148262 | 3.0685  | 8.1319  | -1.8404 |
| CHB | HIST2 | 150153262 | 2.0872  | 8.8096  | -2.2697 |
| CHB | HIST2 | 150158262 | 2.3716  | 12.5367 | -2.4679 |
| CHB | HIST2 | 150163262 | 7.5846  | 12.8755 | -1.2526 |
| CHB | HIST2 | 150168262 | 10.2798 | 9.8261  | 0.1384  |
| CHB | HIST2 | 150173262 | 6.2543  | 9.4872  | -1.0191 |
| CHB | HIST2 | 150178262 | 5.5844  | 9.8261  | -1.2941 |
| CHB | HIST2 | 150183262 | 7.0824  | 9.3178  | -0.7165 |
| CHB | HIST2 | 150188262 | 4.0306  | 6.7766  | -1.1788 |
| CHB | HIST2 | 150193262 | 4.0195  | 6.4378  | -1.0873 |
| CHB | HIST2 | 150198262 | 8.6772  | 9.8261  | -0.3505 |
| CHB | HIST2 | 150203262 | 9.2966  | 10.6731 | -0.3888 |
| CHB | HIST2 | 150208262 | 8.6307  | 10.8426 | -0.6156 |
| CHB | HIST2 | 150213262 | 9.4733  | 12.3673 | -0.7117 |
| CHB | HIST2 | 150218262 | 7.3725  | 9.8261  | -0.7486 |
| CHB | HIST2 | 150223262 | 5.0381  | 7.6237  | -0.9971 |
| CHB | HIST2 | 150228262 | 2.9593  | 6.2684  | -1.5241 |
| CHB | HIST2 | 150233262 | 2.5888  | 4.4048  | -1.1427 |
| CHB | HIST2 | 150238262 | 4.0061  | 5.2519  | -0.6719 |
| CHB | HIST2 | 150243262 | 3.5384  | 6.0989  | -1.2087 |
| CHB | HIST2 | 150248262 | 4.7329  | 6.7766  | -0.8773 |
| CHB | HIST2 | 150253262 | 5.5913  | 8.1319  | -0.9234 |
| CHB | HIST2 | 150258262 | 7.1003  | 8.4708  | -0.4798 |
| CHB | HIST2 | 150263262 | 9.6421  | 9.1484  | 0.161   |
| CHB | HIST2 | 150268262 | 12.8372 | 11.5202 | 0.3463  |
| CHB | HIST2 | 150273262 | 11.4002 | 11.1814 | 0.0592  |
| CHB | HIST2 | 150278262 | 9.6291  | 11.012  | -0.3793 |
| CHB | HIST2 | 150283262 | 10.725  | 12.1979 | -0.367  |
| CHB | HIST2 | 150288262 | 9.5454  | 10.6731 | -0.3185 |
| CHB | HIST2 | 150293262 | 7.1532  | 8.979   | -0.6057 |
| CHB | HIST2 | 150298262 | 4.2285  | 7.7931  | -1.3472 |
| CHB | HIST2 | 150303262 | 6.2768  | 8.3013  | -0.722  |
| CHB | HIST2 | 150308262 | 7.7175  | 10.3343 | -0.7617 |
| CHB | HIST2 | 150313262 | 7.1367  | 9.6567  | -0.7814 |
| CHB | HIST2 | 150318262 | 9.9189  | 10.6731 | -0.213  |
| CHB | HIST2 | 150323262 | 9.2399  | 11.1814 | -0.525  |
| CHB | HIST2 | 150328262 | 8.969   | 11.6896 | -0.7055 |
| CHB | HIST2 | 150333262 | 8.0592  | 11.012  | -0.8099 |

## 2\_TajimasD\_data

|     |       |           |        |         |         |
|-----|-------|-----------|--------|---------|---------|
| CHB | HIST2 | 150338262 | 5.6434 | 7.2848  | -0.6598 |
| CHB | HIST2 | 150343262 | 7.4455 | 6.6072  | 0.3682  |
| CHB | HIST2 | 150348262 | 6.8536 | 8.1319  | -0.4646 |
| CHB | HIST2 | 150353262 | 7.3474 | 11.6896 | -1.1261 |
| YRI | HIST2 | 149358262 | 5.7731 | 6.0502  | -0.1313 |
| YRI | HIST2 | 149363262 | 5.4157 | 7.3947  | -0.782  |
| YRI | HIST2 | 149368262 | 3.5455 | 7.2267  | -1.4854 |
| YRI | HIST2 | 149373262 | 2.8747 | 7.0586  | -1.7248 |
| YRI | HIST2 | 149378262 | 3.6038 | 6.7225  | -1.3439 |
| YRI | HIST2 | 149383262 | 5.2329 | 5.5461  | -0.1604 |
| YRI | HIST2 | 149388262 | 6.9174 | 7.0586  | -0.0582 |
| YRI | HIST2 | 149393262 | 6.4411 | 7.0586  | -0.2546 |
| YRI | HIST2 | 149398262 | 5.1599 | 6.7225  | -0.6733 |
| YRI | HIST2 | 149403262 | 6.9075 | 9.7476  | -0.87   |
| YRI | HIST2 | 149408262 | 6.2346 | 8.7392  | -0.849  |
| YRI | HIST2 | 149413262 | 6.0138 | 7.2267  | -0.4894 |
| YRI | HIST2 | 149418262 | 5.7145 | 5.5461  | 0.0862  |
| YRI | HIST2 | 149423262 | 2.4418 | 3.1932  | -0.6197 |
| YRI | HIST2 | 149428262 | 2.8504 | 4.3696  | -0.9593 |
| YRI | HIST2 | 149433262 | 2.1945 | 2.8571  | -0.5992 |
| YRI | HIST2 | 149438262 | 0.037  | 0.5042  | -1.4683 |
| YRI | HIST2 | 149443262 | 0.0185 | 0.1681  | -0.8893 |
| YRI | HIST2 | 149448262 | 0.1661 | 0.6722  | -1.3249 |
| YRI | HIST2 | 149453262 | 0.6607 | 1.5126  | -1.2685 |
| YRI | HIST2 | 149458262 | 0.5589 | 1.3445  | -1.276  |
| YRI | HIST2 | 149463262 | 0.0643 | 0.5042  | -1.3825 |
| YRI | HIST2 | 149468262 | 0      | 0       | 0       |
| YRI | HIST2 | 149473262 | 0      | 0       | 0       |
| YRI | HIST2 | 149478262 | 0      | 0       | 0       |
| YRI | HIST2 | 149483262 | 0      | 0       | 0       |
| YRI | HIST2 | 149488262 | 0      | 0       | 0       |
| YRI | HIST2 | 149493262 | 0      | 0       | 0       |
| YRI | HIST2 | 149498262 | 0      | 0       | 0       |
| YRI | HIST2 | 149503262 | 0      | 0       | 0       |
| YRI | HIST2 | 149508262 | 0.411  | 0.6722  | -0.6838 |
| YRI | HIST2 | 149513262 | 0.8557 | 2.3529  | -1.5849 |
| YRI | HIST2 | 149518262 | 0.4899 | 1.8487  | -1.738  |
| YRI | HIST2 | 149523262 | 0.0453 | 0.1681  | -0.73   |
| YRI | HIST2 | 149528262 | 0.2339 | 0.5042  | -0.8495 |
| YRI | HIST2 | 149533262 | 0.2339 | 0.5042  | -0.8495 |
| YRI | HIST2 | 149538262 | 0      | 0       | 0       |
| YRI | HIST2 | 149543262 | 0      | 0       | 0       |
| YRI | HIST2 | 149548262 | 0      | 0       | 0       |
| YRI | HIST2 | 149553262 | 0      | 0       | 0       |
| YRI | HIST2 | 149558262 | 0      | 0       | 0       |
| YRI | HIST2 | 149563262 | 0      | 0       | 0       |
| YRI | HIST2 | 149568262 | 0.6355 | 0.6722  | -0.0961 |
| YRI | HIST2 | 149573262 | 1.1098 | 1.6806  | -0.7853 |
| YRI | HIST2 | 149578262 | 1.0245 | 2.0167  | -1.1863 |



## 2\_TajimasD\_data

|     |       |           |         |         |         |
|-----|-------|-----------|---------|---------|---------|
| YRI | HIST2 | 149583262 | 2.3949  | 5.0419  | -1.4748 |
| YRI | HIST2 | 149588262 | 2.2919  | 5.2099  | -1.5795 |
| YRI | HIST2 | 149593262 | 1.2767  | 2.5209  | -1.246  |
| YRI | HIST2 | 149598262 | 3.5693  | 3.5293  | 0.0303  |
| YRI | HIST2 | 149603262 | 6.2413  | 6.3864  | -0.0655 |
| YRI | HIST2 | 149608262 | 5.1044  | 6.8906  | -0.7526 |
| YRI | HIST2 | 149613262 | 1.9094  | 3.1932  | -1.0588 |
| YRI | HIST2 | 149618262 | 0.3065  | 0.5042  | -0.6213 |
| YRI | HIST2 | 149623262 | 0       | 0       | 0       |
| YRI | HIST2 | 149628262 | 0.0093  | 0.1681  | -0.944  |
| YRI | HIST2 | 149633262 | 0.3282  | 0.6722  | -0.9006 |
| YRI | HIST2 | 149638262 | 3.1603  | 2.3529  | 0.8547  |
| YRI | HIST2 | 149643262 | 6.1235  | 5.7141  | 0.2041  |
| YRI | HIST2 | 149648262 | 9.6312  | 10.2518 | -0.1814 |
| YRI | HIST2 | 149653262 | 9.2435  | 10.4199 | -0.3386 |
| YRI | HIST2 | 149658262 | 5.0448  | 6.3864  | -0.6055 |
| YRI | HIST2 | 149663262 | 7.5524  | 7.7309  | -0.0677 |
| YRI | HIST2 | 149668262 | 11.5005 | 14.9575 | -0.7075 |
| YRI | HIST2 | 149673262 | 9.1905  | 13.7811 | -1.0156 |
| YRI | HIST2 | 149678262 | 5.8105  | 8.9073  | -1.0314 |
| YRI | HIST2 | 149683262 | 4.3956  | 9.4115  | -1.5875 |
| YRI | HIST2 | 149688262 | 2.5697  | 8.235   | -2.0285 |
| YRI | HIST2 | 149693262 | 3.4596  | 6.3864  | -1.321  |
| YRI | HIST2 | 149698262 | 6.3424  | 7.7309  | -0.5268 |
| YRI | HIST2 | 149703262 | 7.8847  | 11.4282 | -0.9355 |
| YRI | HIST2 | 149708262 | 8.7188  | 13.445  | -1.0703 |
| YRI | HIST2 | 149713262 | 8.9771  | 11.7644 | -0.7161 |
| YRI | HIST2 | 149718262 | 8.4155  | 11.5963 | -0.8283 |
| YRI | HIST2 | 149723262 | 7.1768  | 11.5963 | -1.1509 |
| YRI | HIST2 | 149728262 | 8.8147  | 12.6047 | -0.9124 |
| YRI | HIST2 | 149733262 | 8.0828  | 12.4366 | -1.0614 |
| YRI | HIST2 | 149738262 | 4.1472  | 8.067   | -1.4304 |
| YRI | HIST2 | 149743262 | 4.3186  | 6.2183  | -0.8782 |
| YRI | HIST2 | 149748262 | 6.322   | 7.2267  | -0.3651 |
| YRI | HIST2 | 149753262 | 6.2614  | 7.8989  | -0.6092 |
| YRI | HIST2 | 149758262 | 6.3939  | 10.4199 | -1.159  |
| YRI | HIST2 | 149763262 | 5.4444  | 10.2518 | -1.4051 |
| YRI | HIST2 | 149768262 | 3.1474  | 8.5712  | -1.8718 |
| YRI | HIST2 | 149773262 | 5.5032  | 11.7644 | -1.6085 |
| YRI | HIST2 | 149778262 | 6.9407  | 12.9408 | -1.4089 |
| YRI | HIST2 | 149783262 | 4.8594  | 12.6047 | -1.8645 |
| YRI | HIST2 | 149788262 | 3.9274  | 10.924  | -1.927  |
| YRI | HIST2 | 149793262 | 2.1402  | 4.8738  | -1.5692 |
| YRI | HIST2 | 149798262 | 0.0456  | 0.1681  | -0.7282 |
| YRI | HIST2 | 149803262 | 0       | 0       | 0       |
| YRI | HIST2 | 149808262 | 0       | 0       | 0       |
| YRI | HIST2 | 149813262 | 2.9777  | 5.7141  | -1.3645 |
| YRI | HIST2 | 149818262 | 5.0549  | 8.5712  | -1.2135 |
| YRI | HIST2 | 149823262 | 2.5589  | 3.0251  | -0.4022 |

## 2\_TajimasD\_data

|     |       |           |         |         |         |
|-----|-------|-----------|---------|---------|---------|
| YRI | HIST2 | 149828262 | 0.4817  | 0.1681  | 1.8643  |
| YRI | HIST2 | 149833262 | 0       | 0       | 0       |
| YRI | HIST2 | 149838262 | 0.0183  | 0.1681  | -0.8905 |
| YRI | HIST2 | 149843262 | 2.537   | 4.2016  | -1.0874 |
| YRI | HIST2 | 149848262 | 4.6542  | 10.5879 | -1.6828 |
| YRI | HIST2 | 149853262 | 4.0685  | 12.7727 | -2.0693 |
| YRI | HIST2 | 149858262 | 3.8285  | 11.9324 | -2.0543 |
| YRI | HIST2 | 149863262 | 6.3146  | 11.9324 | -1.4241 |
| YRI | HIST2 | 149868262 | 7.8278  | 12.4366 | -1.1236 |
| YRI | HIST2 | 149873262 | 5.2619  | 10.924  | -1.5594 |
| YRI | HIST2 | 149878262 | 7.4796  | 11.7644 | -1.1008 |
| YRI | HIST2 | 149883262 | 8.5321  | 11.4282 | -0.7646 |
| YRI | HIST2 | 149888262 | 5.4156  | 11.7644 | -1.631  |
| YRI | HIST2 | 149893262 | 5.1862  | 13.1089 | -1.8378 |
| YRI | HIST2 | 149898262 | 4.378   | 12.6047 | -1.9804 |
| YRI | HIST2 | 149903262 | 5.195   | 12.2685 | -1.7468 |
| YRI | HIST2 | 149908262 | 6.7355  | 11.2602 | -1.2113 |
| YRI | HIST2 | 149913262 | 5.1582  | 11.7644 | -1.6972 |
| YRI | HIST2 | 149918262 | 6.2502  | 13.445  | -1.6294 |
| YRI | HIST2 | 149923262 | 7.2406  | 13.445  | -1.4051 |
| YRI | HIST2 | 149928262 | 8.4768  | 12.7727 | -1.0213 |
| YRI | HIST2 | 149933262 | 9.6141  | 13.445  | -0.8676 |
| YRI | HIST2 | 149938262 | 8.3499  | 12.2685 | -0.9677 |
| YRI | HIST2 | 149943262 | 6.3429  | 9.2434  | -0.9335 |
| YRI | HIST2 | 149948262 | 4.9525  | 8.9073  | -1.3172 |
| YRI | HIST2 | 149953262 | 8.6647  | 12.6047 | -0.9485 |
| YRI | HIST2 | 149958262 | 7.2806  | 10.924  | -1.0035 |
| YRI | HIST2 | 149963262 | 3.7702  | 7.7309  | -1.5028 |
| YRI | HIST2 | 149968262 | 6.4047  | 9.4115  | -0.9516 |
| YRI | HIST2 | 149973262 | 6.9166  | 9.4115  | -0.7896 |
| YRI | HIST2 | 149978262 | 7.1072  | 9.5795  | -0.7697 |
| YRI | HIST2 | 149983262 | 10.3106 | 12.9408 | -0.6176 |
| YRI | HIST2 | 149988262 | 9.2029  | 12.7727 | -0.8487 |
| YRI | HIST2 | 149993262 | 8.8764  | 13.1089 | -0.9818 |
| YRI | HIST2 | 149998262 | 14.1567 | 15.4617 | -0.2588 |
| YRI | HIST2 | 150003262 | 13.1306 | 13.9492 | -0.179  |
| YRI | HIST2 | 150008262 | 12.5625 | 16.134  | -0.68   |
| YRI | HIST2 | 150013262 | 15.4155 | 17.1423 | -0.3103 |
| YRI | HIST2 | 150018262 | 14.3006 | 14.9575 | -0.1344 |
| YRI | HIST2 | 150023262 | 14.1563 | 16.134  | -0.3765 |
| YRI | HIST2 | 150028262 | 11.3176 | 13.1089 | -0.4155 |
| YRI | HIST2 | 150033262 | 7.6112  | 10.5879 | -0.8442 |
| YRI | HIST2 | 150038262 | 8.9277  | 13.445  | -1.023  |
| YRI | HIST2 | 150043262 | 12.7246 | 15.1256 | -0.4862 |
| YRI | HIST2 | 150048262 | 11.1573 | 14.6214 | -0.7245 |
| YRI | HIST2 | 150053262 | 6.832   | 12.4366 | -1.3664 |
| YRI | HIST2 | 150058262 | 7.5799  | 12.9408 | -1.2588 |
| YRI | HIST2 | 150063262 | 9.4442  | 13.445  | -0.9061 |
| YRI | HIST2 | 150068262 | 8.7135  | 11.7644 | -0.7838 |

## 2\_TajimasD\_data

|     |       |           |         |         |         |
|-----|-------|-----------|---------|---------|---------|
| YRI | HIST2 | 150073262 | 9.9749  | 14.4534 | -0.947  |
| YRI | HIST2 | 150078262 | 11.7244 | 17.3104 | -0.9943 |
| YRI | HIST2 | 150083262 | 11.5356 | 15.7978 | -0.828  |
| YRI | HIST2 | 150088262 | 14.0826 | 15.7978 | -0.3332 |
| YRI | HIST2 | 150093262 | 14.225  | 15.4617 | -0.2452 |
| YRI | HIST2 | 150098262 | 10.556  | 13.2769 | -0.6236 |
| YRI | HIST2 | 150103262 | 10.6994 | 14.7895 | -0.8461 |
| YRI | HIST2 | 150108262 | 12.1453 | 16.8062 | -0.8534 |
| YRI | HIST2 | 150113262 | 9.628   | 15.2937 | -1.1352 |
| YRI | HIST2 | 150118262 | 7.5142  | 14.6214 | -1.4864 |
| YRI | HIST2 | 150123262 | 7.9899  | 14.7895 | -1.4066 |
| YRI | HIST2 | 150128262 | 10.0548 | 14.7895 | -0.9795 |
| YRI | HIST2 | 150133262 | 11.5888 | 15.7978 | -0.8177 |
| YRI | HIST2 | 150138262 | 12.7201 | 17.3104 | -0.8171 |
| YRI | HIST2 | 150143262 | 11.5205 | 16.134  | -0.8784 |
| YRI | HIST2 | 150148262 | 7.9488  | 11.7644 | -0.9802 |
| YRI | HIST2 | 150153262 | 10.4622 | 13.1089 | -0.6139 |
| YRI | HIST2 | 150158262 | 16.6195 | 18.991  | -0.3862 |
| YRI | HIST2 | 150163262 | 16.7745 | 19.3272 | -0.4087 |
| YRI | HIST2 | 150168262 | 13.8711 | 17.1423 | -0.5877 |
| YRI | HIST2 | 150173262 | 11.5174 | 15.1256 | -0.7306 |
| YRI | HIST2 | 150178262 | 10.8839 | 13.7811 | -0.6409 |
| YRI | HIST2 | 150183262 | 11.7537 | 14.4534 | -0.5708 |
| YRI | HIST2 | 150188262 | 9.2996  | 11.9324 | -0.6674 |
| YRI | HIST2 | 150193262 | 8.5916  | 10.5879 | -0.5661 |
| YRI | HIST2 | 150198262 | 11.1994 | 11.2602 | -0.0163 |
| YRI | HIST2 | 150203262 | 11.9021 | 11.5963 | 0.0796  |
| YRI | HIST2 | 150208262 | 13.1178 | 14.1172 | -0.2161 |
| YRI | HIST2 | 150213262 | 13.8995 | 15.2937 | -0.2794 |
| YRI | HIST2 | 150218262 | 11.256  | 12.7727 | -0.3606 |
| YRI | HIST2 | 150223262 | 8.162   | 9.9157  | -0.5287 |
| YRI | HIST2 | 150228262 | 4.3385  | 8.4031  | -1.4285 |
| YRI | HIST2 | 150233262 | 3.1579  | 7.2267  | -1.6418 |
| YRI | HIST2 | 150238262 | 4.1905  | 7.2267  | -1.2252 |
| YRI | HIST2 | 150243262 | 4.8034  | 10.0837 | -1.5673 |
| YRI | HIST2 | 150248262 | 6.1037  | 10.924  | -1.3276 |
| YRI | HIST2 | 150253262 | 7.1965  | 9.9157  | -0.8198 |
| YRI | HIST2 | 150258262 | 10.1715 | 10.2518 | -0.0235 |
| YRI | HIST2 | 150263262 | 14.0328 | 12.9408 | 0.2564  |
| YRI | HIST2 | 150268262 | 18.5669 | 17.3104 | 0.2237  |
| YRI | HIST2 | 150273262 | 16.7098 | 16.6382 | 0.0132  |
| YRI | HIST2 | 150278262 | 13.7164 | 15.1256 | -0.2854 |
| YRI | HIST2 | 150283262 | 13.1092 | 14.6214 | -0.3163 |
| YRI | HIST2 | 150288262 | 11.1294 | 12.7727 | -0.3907 |
| YRI | HIST2 | 150293262 | 10.3933 | 12.4366 | -0.4982 |
| YRI | HIST2 | 150298262 | 9.4527  | 12.6047 | -0.7588 |
| YRI | HIST2 | 150303262 | 11.1764 | 12.1005 | -0.2312 |
| YRI | HIST2 | 150308262 | 12.0652 | 13.445  | -0.3125 |
| YRI | HIST2 | 150313262 | 12.1713 | 14.1172 | -0.4208 |

## 2\_TajimasD\_data

|     |       |           |         |         |         |
|-----|-------|-----------|---------|---------|---------|
| YRI | HIST2 | 150318262 | 15.7792 | 14.6214 | 0.2421  |
| YRI | HIST2 | 150323262 | 13.6168 | 14.9575 | -0.2744 |
| YRI | HIST2 | 150328262 | 12.1122 | 14.4534 | -0.495  |
| YRI | HIST2 | 150333262 | 11.4728 | 13.1089 | -0.3795 |
| YRI | HIST2 | 150338262 | 10.2635 | 11.9324 | -0.4231 |
| YRI | HIST2 | 150343262 | 12.3647 | 12.1005 | 0.0661  |
| YRI | HIST2 | 150348262 | 10.0257 | 11.4282 | -0.3703 |
| YRI | HIST2 | 150353262 | 12.4942 | 13.1089 | -0.1426 |
| CEU | HIST2 | 149389459 | 6.7359  | 5.9697  | 0.3698  |
| CEU | HIST2 | 149394459 | 4.5343  | 5.458   | -0.4829 |
| CEU | HIST2 | 149399459 | 5.9819  | 6.6519  | -0.2933 |
| CEU | HIST2 | 149404459 | 5.8442  | 5.6286  | 0.1097  |
| CEU | HIST2 | 149409459 | 2.7594  | 2.2173  | 0.6056  |
| CEU | HIST2 | 149414459 | 4.5403  | 3.4112  | 0.8868  |
| CEU | HIST2 | 149419459 | 3.9518  | 3.0701  | 0.7563  |
| CEU | HIST2 | 149424459 | 1.9445  | 1.8762  | 0.087   |
| CEU | HIST2 | 149429459 | 2.3917  | 3.0701  | -0.5819 |
| CEU | HIST2 | 149434459 | 1.7537  | 2.0467  | -0.3486 |
| CEU | HIST2 | 149439459 | 0       | 0       | 0       |
| CEU | HIST2 | 149444459 | 0.08    | 0.5117  | -1.3539 |
| CEU | HIST2 | 149449459 | 0.1097  | 0.6822  | -1.495  |
| CEU | HIST2 | 149454459 | 0.128   | 0.6822  | -1.4472 |
| CEU | HIST2 | 149459459 | 0.0983  | 0.5117  | -1.2965 |
| CEU | HIST2 | 149464459 | 0       | 0       | 0       |
| CEU | HIST2 | 149469459 | 0       | 0       | 0       |
| CEU | HIST2 | 149474459 | 0       | 0       | 0       |
| CEU | HIST2 | 149479459 | 0       | 0       | 0       |
| CEU | HIST2 | 149484459 | 0       | 0       | 0       |
| CEU | HIST2 | 149489459 | 0       | 0       | 0       |
| CEU | HIST2 | 149494459 | 0       | 0       | 0       |
| CEU | HIST2 | 149499459 | 0       | 0       | 0       |
| CEU | HIST2 | 149504459 | 0       | 0       | 0       |
| CEU | HIST2 | 149509459 | 0.4605  | 1.1939  | -1.3069 |
| CEU | HIST2 | 149514459 | 0.4605  | 1.1939  | -1.3069 |
| CEU | HIST2 | 149519459 | 0       | 0       | 0       |
| CEU | HIST2 | 149524459 | 0       | 0       | 0       |
| CEU | HIST2 | 149529459 | 0.0101  | 0.1706  | -0.9534 |
| CEU | HIST2 | 149534459 | 0.0101  | 0.1706  | -0.9534 |
| CEU | HIST2 | 149539459 | 0       | 0       | 0       |
| CEU | HIST2 | 149544459 | 0       | 0       | 0       |
| CEU | HIST2 | 149549459 | 0       | 0       | 0       |
| CEU | HIST2 | 149554459 | 0       | 0       | 0       |
| CEU | HIST2 | 149559459 | 0       | 0       | 0       |
| CEU | HIST2 | 149564459 | 0       | 0       | 0       |
| CEU | HIST2 | 149569459 | 0.6005  | 0.3411  | 1.0399  |
| CEU | HIST2 | 149574459 | 0.885   | 0.6822  | 0.5296  |
| CEU | HIST2 | 149579459 | 1.1946  | 1.7056  | -0.6999 |
| CEU | HIST2 | 149584459 | 2.8182  | 3.2407  | -0.3464 |
| CEU | HIST2 | 149589459 | 3.6436  | 3.2407  | 0.3304  |

## 2\_TajimasD\_data

|     |       |           |         |        |         |
|-----|-------|-----------|---------|--------|---------|
| CEU | HIST2 | 149594459 | 2.5601  | 3.0701 | -0.4375 |
| CEU | HIST2 | 149599459 | 2.6537  | 2.3879 | 0.2799  |
| CEU | HIST2 | 149604459 | 6.5329  | 4.0935 | 1.6403  |
| CEU | HIST2 | 149609459 | 7.4115  | 4.9463 | 1.4059  |
| CEU | HIST2 | 149614459 | 2.7077  | 1.5351 | 1.7387  |
| CEU | HIST2 | 149619459 | 0       | 0      | 0       |
| CEU | HIST2 | 149624459 | 0       | 0      | 0       |
| CEU | HIST2 | 149629459 | 0.0301  | 0.1706 | -0.8346 |
| CEU | HIST2 | 149634459 | 0.0503  | 0.5117 | -1.4471 |
| CEU | HIST2 | 149639459 | 2.4197  | 1.8762 | 0.692   |
| CEU | HIST2 | 149644459 | 5.8895  | 5.2874 | 0.3238  |
| CEU | HIST2 | 149649459 | 7.9742  | 6.8225 | 0.4928  |
| CEU | HIST2 | 149654459 | 7.0229  | 4.9463 | 1.1843  |
| CEU | HIST2 | 149659459 | 5.1544  | 4.7757 | 0.2227  |
| CEU | HIST2 | 149664459 | 5.181   | 7.1636 | -0.8116 |
| CEU | HIST2 | 149669459 | 5.0812  | 9.3809 | -1.3736 |
| CEU | HIST2 | 149674459 | 5.0775  | 8.3576 | -1.166  |
| CEU | HIST2 | 149679459 | 4.4789  | 6.3108 | -0.8411 |
| CEU | HIST2 | 149684459 | 2.59    | 4.2641 | -1.0867 |
| CEU | HIST2 | 149689459 | 0.8336  | 3.0701 | -1.9184 |
| CEU | HIST2 | 149694459 | 2.3156  | 4.6052 | -1.3901 |
| CEU | HIST2 | 149699459 | 3.4494  | 5.6286 | -1.1085 |
| CEU | HIST2 | 149704459 | 6.2375  | 7.1636 | -0.3791 |
| CEU | HIST2 | 149709459 | 7.6464  | 7.1636 | 0.1976  |
| CEU | HIST2 | 149714459 | 9.2695  | 7.8459 | 0.5363  |
| CEU | HIST2 | 149719459 | 11.4108 | 8.187  | 1.1679  |
| CEU | HIST2 | 149724459 | 8.444   | 6.3108 | 0.9794  |
| CEU | HIST2 | 149729459 | 6.5995  | 6.1402 | 0.2161  |
| CEU | HIST2 | 149734459 | 4.9445  | 5.2874 | -0.1844 |
| CEU | HIST2 | 149739459 | 2.497   | 3.4112 | -0.718  |
| CEU | HIST2 | 149744459 | 4.2909  | 3.7524 | 0.3901  |
| CEU | HIST2 | 149749459 | 4.3739  | 3.7524 | 0.4503  |
| CEU | HIST2 | 149754459 | 1.0794  | 2.3879 | -1.378  |
| CEU | HIST2 | 149759459 | 2.0045  | 4.6052 | -1.579  |
| CEU | HIST2 | 149764459 | 2.4263  | 5.458  | -1.5849 |
| CEU | HIST2 | 149769459 | 2.698   | 4.7757 | -1.222  |
| CEU | HIST2 | 149774459 | 4.4282  | 6.4814 | -0.9203 |
| CEU | HIST2 | 149779459 | 5.0936  | 7.3342 | -0.8977 |
| CEU | HIST2 | 149784459 | 4.7163  | 7.8459 | -1.179  |
| CEU | HIST2 | 149789459 | 2.8621  | 5.6286 | -1.4072 |
| CEU | HIST2 | 149794459 | 0.644   | 1.3645 | -1.1656 |
| CEU | HIST2 | 149799459 | 0       | 0      | 0       |
| CEU | HIST2 | 149804459 | 0       | 0      | 0       |
| CEU | HIST2 | 149809459 | 0       | 0      | 0       |
| CEU | HIST2 | 149814459 | 1.9779  | 2.8996 | -0.8289 |
| CEU | HIST2 | 149819459 | 2.7071  | 4.2641 | -1.0107 |
| CEU | HIST2 | 149824459 | 1.2284  | 1.5351 | -0.4548 |
| CEU | HIST2 | 149829459 | 0.4993  | 0.1706 | 1.9525  |
| CEU | HIST2 | 149834459 | 0       | 0      | 0       |

## 2\_TajimasD\_data

|     |       |           |         |         |         |
|-----|-------|-----------|---------|---------|---------|
| CEU | HIST2 | 149839459 | 0.2012  | 0.3411  | -0.5608 |
| CEU | HIST2 | 149844459 | 1.7025  | 3.0701  | -1.1731 |
| CEU | HIST2 | 149849459 | 2.4467  | 4.7757  | -1.3698 |
| CEU | HIST2 | 149854459 | 1.698   | 4.9463  | -1.8525 |
| CEU | HIST2 | 149859459 | 3.1481  | 6.6519  | -1.534  |
| CEU | HIST2 | 149864459 | 5.1378  | 8.6987  | -1.2199 |
| CEU | HIST2 | 149869459 | 5.0006  | 8.5281  | -1.2308 |
| CEU | HIST2 | 149874459 | 3.4304  | 5.458   | -1.06   |
| CEU | HIST2 | 149879459 | 3.336   | 5.7991  | -1.22   |
| CEU | HIST2 | 149884459 | 3.1241  | 5.2874  | -1.1632 |
| CEU | HIST2 | 149889459 | 3.1824  | 4.2641  | -0.7022 |
| CEU | HIST2 | 149894459 | 3.7693  | 5.7991  | -1.0053 |
| CEU | HIST2 | 149899459 | 2.9536  | 5.2874  | -1.2549 |
| CEU | HIST2 | 149904459 | 3.7792  | 5.458   | -0.8776 |
| CEU | HIST2 | 149909459 | 3.3746  | 5.1169  | -0.9644 |
| CEU | HIST2 | 149914459 | 1.7974  | 4.2641  | -1.6012 |
| CEU | HIST2 | 149919459 | 2.4978  | 4.4346  | -1.2152 |
| CEU | HIST2 | 149924459 | 4.3737  | 5.2874  | -0.4913 |
| CEU | HIST2 | 149929459 | 3.5704  | 5.7991  | -1.1039 |
| CEU | HIST2 | 149934459 | 1.8611  | 5.2874  | -1.8423 |
| CEU | HIST2 | 149939459 | 2.1715  | 4.2641  | -1.3584 |
| CEU | HIST2 | 149944459 | 2.3768  | 3.7524  | -0.9966 |
| CEU | HIST2 | 149949459 | 2.3469  | 4.7757  | -1.4285 |
| CEU | HIST2 | 149954459 | 2.617   | 5.1169  | -1.3837 |
| CEU | HIST2 | 149959459 | 1.8481  | 3.7524  | -1.3796 |
| CEU | HIST2 | 149964459 | 1.3956  | 3.0701  | -1.4364 |
| CEU | HIST2 | 149969459 | 2.22    | 3.7524  | -1.1102 |
| CEU | HIST2 | 149974459 | 2.5533  | 4.2641  | -1.1106 |
| CEU | HIST2 | 149979459 | 2.1841  | 4.2641  | -1.3502 |
| CEU | HIST2 | 149984459 | 3.316   | 5.2874  | -1.06   |
| CEU | HIST2 | 149989459 | 4.7126  | 6.3108  | -0.7338 |
| CEU | HIST2 | 149994459 | 7.1295  | 8.187   | -0.3831 |
| CEU | HIST2 | 149999459 | 10.0827 | 8.5281  | 0.5424  |
| CEU | HIST2 | 150004459 | 7.9911  | 5.9697  | 0.9756  |
| CEU | HIST2 | 150009459 | 9.4409  | 8.8692  | 0.1924  |
| CEU | HIST2 | 150014459 | 11.8881 | 10.5749 | 0.3752  |
| CEU | HIST2 | 150019459 | 8.1927  | 6.8225  | 0.5863  |
| CEU | HIST2 | 150024459 | 6.4265  | 6.6519  | -0.0987 |
| CEU | HIST2 | 150029459 | 4.7699  | 5.9697  | -0.579  |
| CEU | HIST2 | 150034459 | 2.6294  | 4.7757  | -1.2623 |
| CEU | HIST2 | 150039459 | 3.4766  | 5.9697  | -1.2032 |
| CEU | HIST2 | 150044459 | 4.1018  | 5.9697  | -0.9015 |
| CEU | HIST2 | 150049459 | 3.7922  | 4.9463  | -0.6582 |
| CEU | HIST2 | 150054459 | 3.7751  | 4.9463  | -0.6679 |
| CEU | HIST2 | 150059459 | 2.31    | 4.4346  | -1.333  |
| CEU | HIST2 | 150064459 | 2.027   | 3.9229  | -1.3223 |
| CEU | HIST2 | 150069459 | 3.6792  | 4.4346  | -0.474  |
| CEU | HIST2 | 150074459 | 5.7254  | 6.1402  | -0.1952 |
| CEU | HIST2 | 150079459 | 5.7547  | 6.6519  | -0.3928 |

## 2\_TajimasD\_data

|     |       |           |         |         |         |
|-----|-------|-----------|---------|---------|---------|
| CEU | HIST2 | 150084459 | 3.9699  | 5.9697  | -0.9651 |
| CEU | HIST2 | 150089459 | 3.9388  | 7.3342  | -1.3604 |
| CEU | HIST2 | 150094459 | 4.1577  | 6.4814  | -1.0415 |
| CEU | HIST2 | 150099459 | 4.2117  | 5.458   | -0.6515 |
| CEU | HIST2 | 150104459 | 5.2463  | 6.8225  | -0.6745 |
| CEU | HIST2 | 150109459 | 5.7805  | 6.3108  | -0.2435 |
| CEU | HIST2 | 150114459 | 4.6889  | 5.2874  | -0.3218 |
| CEU | HIST2 | 150119459 | 3.0992  | 5.458   | -1.2331 |
| CEU | HIST2 | 150124459 | 3.5883  | 6.6519  | -1.3413 |
| CEU | HIST2 | 150129459 | 6.7664  | 9.0398  | -0.7516 |
| CEU | HIST2 | 150134459 | 7.8642  | 9.8926  | -0.6168 |
| CEU | HIST2 | 150139459 | 5.8427  | 10.2337 | -1.2936 |
| CEU | HIST2 | 150144459 | 5.4302  | 8.5281  | -1.0809 |
| CEU | HIST2 | 150149459 | 4.8528  | 6.8225  | -0.8428 |
| CEU | HIST2 | 150154459 | 3.7067  | 7.8459  | -1.5593 |
| CEU | HIST2 | 150159459 | 5.6559  | 9.7221  | -1.2566 |
| CEU | HIST2 | 150164459 | 9.1921  | 8.8692  | 0.1087  |
| CEU | HIST2 | 150169459 | 9.7535  | 6.9931  | 1.155   |
| CEU | HIST2 | 150174459 | 7.589   | 6.9931  | 0.2493  |
| CEU | HIST2 | 150179459 | 7.6423  | 5.7991  | 0.9129  |
| CEU | HIST2 | 150184459 | 7.6252  | 6.1402  | 0.6988  |
| CEU | HIST2 | 150189459 | 5.437   | 6.4814  | -0.4681 |
| CEU | HIST2 | 150194459 | 5.6015  | 5.6286  | -0.0138 |
| CEU | HIST2 | 150199459 | 9.2808  | 6.8225  | 1.0519  |
| CEU | HIST2 | 150204459 | 8.4469  | 7.1636  | 0.5253  |
| CEU | HIST2 | 150209459 | 9.1062  | 8.0164  | 0.4025  |
| CEU | HIST2 | 150214459 | 9.804   | 7.8459  | 0.7376  |
| CEU | HIST2 | 150219459 | 7.2171  | 5.7991  | 0.7023  |
| CEU | HIST2 | 150224459 | 5.8103  | 5.2874  | 0.2812  |
| CEU | HIST2 | 150229459 | 3.1051  | 4.4346  | -0.8342 |
| CEU | HIST2 | 150234459 | 2.8266  | 3.0701  | -0.2089 |
| CEU | HIST2 | 150239459 | 3.2463  | 3.5818  | -0.2529 |
| CEU | HIST2 | 150244459 | 4.229   | 5.458   | -0.6425 |
| CEU | HIST2 | 150249459 | 5.3032  | 4.4346  | 0.545   |
| CEU | HIST2 | 150254459 | 6.9219  | 5.6286  | 0.6579  |
| CEU | HIST2 | 150259459 | 9.9767  | 8.5281  | 0.5054  |
| CEU | HIST2 | 150264459 | 15.1144 | 9.0398  | 2.0084  |
| CEU | HIST2 | 150269459 | 18.4865 | 11.4277 | 1.8754  |
| CEU | HIST2 | 150274459 | 15.8481 | 11.4277 | 1.1744  |
| CEU | HIST2 | 150279459 | 16.1664 | 11.0866 | 1.3886  |
| CEU | HIST2 | 150284459 | 13.5457 | 9.5515  | 1.2548  |
| CEU | HIST2 | 150289459 | 10.147  | 7.1636  | 1.2213  |
| CEU | HIST2 | 150294459 | 10.9838 | 8.187   | 1.0132  |
| CEU | HIST2 | 150299459 | 8.7981  | 7.8459  | 0.3587  |
| CEU | HIST2 | 150304459 | 8.5962  | 8.0164  | 0.2142  |
| CEU | HIST2 | 150309459 | 9.9116  | 8.6987  | 0.4155  |
| CEU | HIST2 | 150314459 | 9.4723  | 8.6987  | 0.265   |
| CEU | HIST2 | 150319459 | 13.4572 | 10.2337 | 0.9497  |
| CEU | HIST2 | 150324459 | 13.9644 | 10.4043 | 1.0328  |

## 2\_TajimasD\_data

|     |       |           |         |         |         |
|-----|-------|-----------|---------|---------|---------|
| CEU | HIST2 | 150329459 | 12.7874 | 9.2104  | 1.1623  |
| CEU | HIST2 | 150334459 | 12.7375 | 9.5515  | 1.0009  |
| CEU | HIST2 | 150339459 | 9.6156  | 9.0398  | 0.1904  |
| CEU | HIST2 | 150344459 | 9.3276  | 8.0164  | 0.4843  |
| CEU | HIST2 | 150349459 | 10.1779 | 8.6987  | 0.5068  |
| CEU | HIST2 | 150354459 | 13.1525 | 10.0632 | 0.9245  |
| CEU | HIST2 | 150359459 | 15.3976 | 10.5749 | 1.3779  |
| CEU | HIST2 | 150364459 | 13.1202 | 10.4043 | 0.7879  |
| CEU | HIST2 | 150369459 | 11.3063 | 10.916  | 0.1082  |
| CEU | HIST2 | 150374459 | 13.987  | 11.4277 | 0.68    |
| CEU | HIST2 | 150379459 | 14.7563 | 10.916  | 1.0651  |
| CHB | HIST2 | 149389459 | 5.0986  | 6.6072  | -0.6626 |
| CHB | HIST2 | 149394459 | 3.6448  | 5.4213  | -0.9315 |
| CHB | HIST2 | 149399459 | 5.0101  | 6.2684  | -0.5795 |
| CHB | HIST2 | 149404459 | 4.5336  | 6.0989  | -0.7389 |
| CHB | HIST2 | 149409459 | 1.9524  | 3.2189  | -1.0412 |
| CHB | HIST2 | 149414459 | 4.1706  | 4.2354  | -0.0422 |
| CHB | HIST2 | 149419459 | 3.7875  | 4.7436  | -0.564  |
| CHB | HIST2 | 149424459 | 1.3878  | 3.0495  | -1.4291 |
| CHB | HIST2 | 149429459 | 1.9345  | 3.7271  | -1.3023 |
| CHB | HIST2 | 149434459 | 1.5755  | 2.5412  | -0.9643 |
| CHB | HIST2 | 149439459 | 0       | 0       | 0       |
| CHB | HIST2 | 149444459 | 0.0289  | 0.3388  | -1.2431 |
| CHB | HIST2 | 149449459 | 0.0386  | 0.5082  | -1.4741 |
| CHB | HIST2 | 149454459 | 0.097   | 1.3553  | -2.0393 |
| CHB | HIST2 | 149459459 | 0.0873  | 1.1859  | -1.961  |
| CHB | HIST2 | 149464459 | 0       | 0       | 0       |
| CHB | HIST2 | 149469459 | 0       | 0       | 0       |
| CHB | HIST2 | 149474459 | 0       | 0       | 0       |
| CHB | HIST2 | 149479459 | 0       | 0       | 0       |
| CHB | HIST2 | 149484459 | 0       | 0       | 0       |
| CHB | HIST2 | 149489459 | 0       | 0       | 0       |
| CHB | HIST2 | 149494459 | 0       | 0       | 0       |
| CHB | HIST2 | 149499459 | 0       | 0       | 0       |
| CHB | HIST2 | 149504459 | 0       | 0       | 0       |
| CHB | HIST2 | 149509459 | 0.8968  | 1.0165  | -0.2382 |
| CHB | HIST2 | 149514459 | 0.9065  | 1.1859  | -0.4987 |
| CHB | HIST2 | 149519459 | 0.0097  | 0.1694  | -0.949  |
| CHB | HIST2 | 149524459 | 0       | 0       | 0       |
| CHB | HIST2 | 149529459 | 0.2578  | 0.1694  | 0.5253  |
| CHB | HIST2 | 149534459 | 0.2578  | 0.1694  | 0.5253  |
| CHB | HIST2 | 149539459 | 0       | 0       | 0       |
| CHB | HIST2 | 149544459 | 0       | 0       | 0       |
| CHB | HIST2 | 149549459 | 0       | 0       | 0       |
| CHB | HIST2 | 149554459 | 0       | 0       | 0       |
| CHB | HIST2 | 149559459 | 0       | 0       | 0       |
| CHB | HIST2 | 149564459 | 0.0097  | 0.1694  | -0.949  |
| CHB | HIST2 | 149569459 | 0.4891  | 0.5082  | -0.06   |
| CHB | HIST2 | 149574459 | 0.8942  | 0.6777  | 0.566   |



## 2\_TajimasD\_data

|     |       |           |        |        |         |
|-----|-------|-----------|--------|--------|---------|
| CHB | HIST2 | 149579459 | 1.624  | 2.033  | -0.4877 |
| CHB | HIST2 | 149584459 | 3.6655 | 3.7271 | -0.0448 |
| CHB | HIST2 | 149589459 | 3.3196 | 2.8801 | 0.3963  |
| CHB | HIST2 | 149594459 | 2.4999 | 2.2024 | 0.3331  |
| CHB | HIST2 | 149599459 | 3.4474 | 2.033  | 1.6867  |
| CHB | HIST2 | 149604459 | 6.7636 | 4.4048 | 1.4843  |
| CHB | HIST2 | 149609459 | 6.6722 | 5.5907 | 0.5518  |
| CHB | HIST2 | 149614459 | 1.7194 | 1.8636 | -0.184  |
| CHB | HIST2 | 149619459 | 0      | 0      | 0       |
| CHB | HIST2 | 149624459 | 0      | 0      | 0       |
| CHB | HIST2 | 149629459 | 0.0097 | 0.1694 | -0.949  |
| CHB | HIST2 | 149634459 | 0.0769 | 0.6777 | -1.5707 |
| CHB | HIST2 | 149639459 | 2.9195 | 2.033  | 1.0572  |
| CHB | HIST2 | 149644459 | 6.6878 | 5.2519 | 0.7744  |
| CHB | HIST2 | 149649459 | 7.8009 | 6.946  | 0.3589  |
| CHB | HIST2 | 149654459 | 5.7282 | 5.2519 | 0.2569  |
| CHB | HIST2 | 149659459 | 3.8761 | 4.5742 | -0.4251 |
| CHB | HIST2 | 149664459 | 6.4864 | 5.4213 | 0.5585  |
| CHB | HIST2 | 149669459 | 8.3809 | 7.6237 | 0.292   |
| CHB | HIST2 | 149674459 | 6.8664 | 7.4543 | -0.2314 |
| CHB | HIST2 | 149679459 | 4.7181 | 5.5907 | -0.4452 |
| CHB | HIST2 | 149684459 | 3.15   | 5.2519 | -1.1336 |
| CHB | HIST2 | 149689459 | 2.4038 | 4.5742 | -1.3216 |
| CHB | HIST2 | 149694459 | 4.2829 | 4.7436 | -0.2718 |
| CHB | HIST2 | 149699459 | 4.8056 | 4.2354 | 0.3712  |
| CHB | HIST2 | 149704459 | 6.3931 | 6.6072 | -0.094  |
| CHB | HIST2 | 149709459 | 6.9815 | 7.4543 | -0.1861 |
| CHB | HIST2 | 149714459 | 7.1251 | 7.2848 | -0.0642 |
| CHB | HIST2 | 149719459 | 8.6398 | 9.1484 | -0.1658 |
| CHB | HIST2 | 149724459 | 7.1888 | 8.8096 | -0.5472 |
| CHB | HIST2 | 149729459 | 6.3573 | 7.9625 | -0.5948 |
| CHB | HIST2 | 149734459 | 4.6429 | 6.4378 | -0.807  |
| CHB | HIST2 | 149739459 | 1.8848 | 3.7271 | -1.3384 |
| CHB | HIST2 | 149744459 | 3.4293 | 3.0495 | 0.3266  |
| CHB | HIST2 | 149749459 | 3.8595 | 3.2189 | 0.5267  |
| CHB | HIST2 | 149754459 | 0.8839 | 2.8801 | -1.7998 |
| CHB | HIST2 | 149759459 | 2.1334 | 6.7766 | -1.9932 |
| CHB | HIST2 | 149764459 | 1.9448 | 6.0989 | -1.9609 |
| CHB | HIST2 | 149769459 | 1.2619 | 4.5742 | -2.0169 |
| CHB | HIST2 | 149774459 | 1.6078 | 5.9295 | -2.0922 |
| CHB | HIST2 | 149779459 | 1.0154 | 4.913  | -2.2294 |
| CHB | HIST2 | 149784459 | 0.7089 | 4.4048 | -2.3256 |
| CHB | HIST2 | 149789459 | 0.5089 | 4.7436 | -2.4979 |
| CHB | HIST2 | 149794459 | 0.3541 | 2.7106 | -2.2329 |
| CHB | HIST2 | 149799459 | 0      | 0      | 0       |
| CHB | HIST2 | 149804459 | 0      | 0      | 0       |
| CHB | HIST2 | 149809459 | 0      | 0      | 0       |
| CHB | HIST2 | 149814459 | 0.5846 | 3.2189 | -2.1658 |
| CHB | HIST2 | 149819459 | 1.276  | 5.4213 | -2.1737 |

## 2\_TajimasD\_data

|     |       |           |        |         |         |
|-----|-------|-----------|--------|---------|---------|
| CHB | HIST2 | 149824459 | 1.0575 | 2.3718  | -1.3873 |
| CHB | HIST2 | 149829459 | 0.3661 | 0.1694  | 1.1688  |
| CHB | HIST2 | 149834459 | 0      | 0       | 0       |
| CHB | HIST2 | 149839459 | 0.0192 | 0.1694  | -0.8925 |
| CHB | HIST2 | 149844459 | 0.4419 | 3.2189  | -2.2831 |
| CHB | HIST2 | 149849459 | 0.6989 | 6.0989  | -2.549  |
| CHB | HIST2 | 149854459 | 0.7824 | 6.0989  | -2.5096 |
| CHB | HIST2 | 149859459 | 1.6797 | 6.7766  | -2.1879 |
| CHB | HIST2 | 149864459 | 1.8187 | 7.6237  | -2.2386 |
| CHB | HIST2 | 149869459 | 0.858  | 6.6072  | -2.5251 |
| CHB | HIST2 | 149874459 | 0.6971 | 4.5742  | -2.3608 |
| CHB | HIST2 | 149879459 | 1.6206 | 6.6072  | -2.1902 |
| CHB | HIST2 | 149884459 | 1.7893 | 7.4543  | -2.2299 |
| CHB | HIST2 | 149889459 | 1.906  | 6.0989  | -1.9792 |
| CHB | HIST2 | 149894459 | 1.5627 | 7.2848  | -2.3001 |
| CHB | HIST2 | 149899459 | 0.6136 | 6.6072  | -2.6325 |
| CHB | HIST2 | 149904459 | 1.7671 | 6.7766  | -2.1504 |
| CHB | HIST2 | 149909459 | 2.4931 | 8.1319  | -2.0496 |
| CHB | HIST2 | 149914459 | 1.8749 | 6.6072  | -2.0785 |
| CHB | HIST2 | 149919459 | 2.4125 | 7.7931  | -2.0336 |
| CHB | HIST2 | 149924459 | 3.7421 | 10.1649 | -1.8987 |
| CHB | HIST2 | 149929459 | 3.0817 | 9.4872  | -2.0192 |
| CHB | HIST2 | 149934459 | 1.9947 | 9.6567  | -2.3758 |
| CHB | HIST2 | 149939459 | 2.3731 | 9.3178  | -2.226  |
| CHB | HIST2 | 149944459 | 2.4479 | 7.6237  | -1.9959 |
| CHB | HIST2 | 149949459 | 1.924  | 7.4543  | -2.1769 |
| CHB | HIST2 | 149954459 | 1.7725 | 7.9625  | -2.2938 |
| CHB | HIST2 | 149959459 | 1.4464 | 6.7766  | -2.2881 |
| CHB | HIST2 | 149964459 | 1.0267 | 6.2684  | -2.4141 |
| CHB | HIST2 | 149969459 | 1.1121 | 5.4213  | -2.2596 |
| CHB | HIST2 | 149974459 | 1.7386 | 4.913   | -1.8157 |
| CHB | HIST2 | 149979459 | 2.0187 | 5.5907  | -1.8225 |
| CHB | HIST2 | 149984459 | 2.3748 | 8.1319  | -2.0926 |
| CHB | HIST2 | 149989459 | 2.2899 | 10.3343 | -2.3416 |
| CHB | HIST2 | 149994459 | 5.6202 | 10.6731 | -1.4271 |
| CHB | HIST2 | 149999459 | 7.5326 | 11.3508 | -1.0179 |
| CHB | HIST2 | 150004459 | 3.7986 | 9.4872  | -1.7932 |
| CHB | HIST2 | 150009459 | 2.3642 | 10.1649 | -2.306  |
| CHB | HIST2 | 150014459 | 1.6198 | 10.1649 | -2.526  |
| CHB | HIST2 | 150019459 | 1.6077 | 7.7931  | -2.3378 |
| CHB | HIST2 | 150024459 | 1.897  | 9.1484  | -2.3642 |
| CHB | HIST2 | 150029459 | 0.9937 | 7.6237  | -2.5567 |
| CHB | HIST2 | 150034459 | 1.1982 | 5.9295  | -2.2905 |
| CHB | HIST2 | 150039459 | 2.147  | 7.1154  | -2.0404 |
| CHB | HIST2 | 150044459 | 1.6018 | 6.7766  | -2.2214 |
| CHB | HIST2 | 150049459 | 0.6539 | 6.4378  | -2.6006 |
| CHB | HIST2 | 150054459 | 1.102  | 6.0989  | -2.3588 |
| CHB | HIST2 | 150059459 | 1.0721 | 5.4213  | -2.2806 |
| CHB | HIST2 | 150064459 | 0.5477 | 5.2519  | -2.5371 |

## 2\_TajimasD\_data

|     |       |           |         |         |         |
|-----|-------|-----------|---------|---------|---------|
| CHB | HIST2 | 150069459 | 1.2126  | 6.4378  | -2.3494 |
| CHB | HIST2 | 150074459 | 1.2802  | 7.1154  | -2.3963 |
| CHB | HIST2 | 150079459 | 0.6728  | 5.9295  | -2.5448 |
| CHB | HIST2 | 150084459 | 1.0249  | 5.5907  | -2.3296 |
| CHB | HIST2 | 150089459 | 1.8978  | 6.7766  | -2.0943 |
| CHB | HIST2 | 150094459 | 1.8374  | 7.2848  | -2.1897 |
| CHB | HIST2 | 150099459 | 1.127   | 6.946   | -2.4426 |
| CHB | HIST2 | 150104459 | 1.8089  | 7.4543  | -2.2222 |
| CHB | HIST2 | 150109459 | 1.6577  | 7.4543  | -2.2817 |
| CHB | HIST2 | 150114459 | 0.9918  | 6.4378  | -2.4487 |
| CHB | HIST2 | 150119459 | 1.5049  | 7.1154  | -2.3041 |
| CHB | HIST2 | 150124459 | 2.2345  | 7.7931  | -2.1009 |
| CHB | HIST2 | 150129459 | 2.6314  | 8.1319  | -1.9993 |
| CHB | HIST2 | 150134459 | 2.7703  | 8.979   | -2.0596 |
| CHB | HIST2 | 150139459 | 1.967   | 9.6567  | -2.3844 |
| CHB | HIST2 | 150144459 | 2.3647  | 8.8096  | -2.176  |
| CHB | HIST2 | 150149459 | 3.0868  | 7.7931  | -1.7787 |
| CHB | HIST2 | 150154459 | 1.7704  | 8.979   | -2.3913 |
| CHB | HIST2 | 150159459 | 3.2751  | 13.3838 | -2.3071 |
| CHB | HIST2 | 150164459 | 8.5075  | 13.045  | -1.061  |
| CHB | HIST2 | 150169459 | 9.3674  | 9.1484  | 0.0714  |
| CHB | HIST2 | 150174459 | 6.3406  | 10.3343 | -1.1625 |
| CHB | HIST2 | 150179459 | 6.5998  | 9.9955  | -1.0197 |
| CHB | HIST2 | 150184459 | 6.5448  | 8.4708  | -0.6742 |
| CHB | HIST2 | 150189459 | 3.9913  | 6.6072  | -1.1489 |
| CHB | HIST2 | 150194459 | 4.9538  | 6.4378  | -0.6673 |
| CHB | HIST2 | 150199459 | 9.4986  | 10.1649 | -0.197  |
| CHB | HIST2 | 150204459 | 8.3413  | 10.6731 | -0.6586 |
| CHB | HIST2 | 150209459 | 8.2692  | 11.1814 | -0.7874 |
| CHB | HIST2 | 150214459 | 8.9364  | 11.6896 | -0.714  |
| CHB | HIST2 | 150219459 | 6.3823  | 8.8096  | -0.8195 |
| CHB | HIST2 | 150224459 | 5.0286  | 7.7931  | -1.0448 |
| CHB | HIST2 | 150229459 | 2.9499  | 6.0989  | -1.4865 |
| CHB | HIST2 | 150234459 | 2.5597  | 3.8965  | -0.935  |
| CHB | HIST2 | 150239459 | 3.6457  | 5.0825  | -0.7977 |
| CHB | HIST2 | 150244459 | 4.8837  | 7.1154  | -0.9165 |
| CHB | HIST2 | 150249459 | 4.7634  | 7.1154  | -0.9659 |
| CHB | HIST2 | 150254459 | 5.3335  | 7.6237  | -0.8832 |
| CHB | HIST2 | 150259459 | 7.5113  | 8.6402  | -0.388  |
| CHB | HIST2 | 150264459 | 10.913  | 10.1649 | 0.2211  |
| CHB | HIST2 | 150269459 | 13.0615 | 11.5202 | 0.4052  |
| CHB | HIST2 | 150274459 | 10.7015 | 11.012  | -0.0852 |
| CHB | HIST2 | 150279459 | 10.2984 | 11.8591 | -0.3993 |
| CHB | HIST2 | 150284459 | 9.5655  | 11.1814 | -0.4369 |
| CHB | HIST2 | 150289459 | 8.241   | 9.8261  | -0.4836 |
| CHB | HIST2 | 150294459 | 7.448   | 9.3178  | -0.5993 |
| CHB | HIST2 | 150299459 | 5.6961  | 8.8096  | -1.0512 |
| CHB | HIST2 | 150304459 | 6.2947  | 9.3178  | -0.969  |
| CHB | HIST2 | 150309459 | 6.9379  | 9.4872  | -0.8036 |

## 2\_TajimasD\_data

|     |       |           |         |         |         |
|-----|-------|-----------|---------|---------|---------|
| CHB | HIST2 | 150314459 | 6.5543  | 8.6402  | -0.717  |
| CHB | HIST2 | 150319459 | 9.6168  | 10.5037 | -0.2543 |
| CHB | HIST2 | 150324459 | 9.5155  | 11.5202 | -0.5271 |
| CHB | HIST2 | 150329459 | 8.9638  | 11.3508 | -0.6364 |
| CHB | HIST2 | 150334459 | 8.7974  | 10.6731 | -0.5298 |
| CHB | HIST2 | 150339459 | 6.4319  | 7.6237  | -0.4596 |
| CHB | HIST2 | 150344459 | 6.3941  | 6.4378  | -0.0196 |
| CHB | HIST2 | 150349459 | 6.0097  | 8.3013  | -0.8173 |
| CHB | HIST2 | 150354459 | 7.6448  | 12.1979 | -1.1344 |
| CHB | HIST2 | 150359459 | 9.1793  | 12.8755 | -0.875  |
| CHB | HIST2 | 150364459 | 8.2857  | 11.1814 | -0.783  |
| CHB | HIST2 | 150369459 | 8.3099  | 12.8755 | -1.0809 |
| CHB | HIST2 | 150374459 | 10.4287 | 15.4168 | -0.9952 |
| CHB | HIST2 | 150379459 | 10.0878 | 15.4168 | -1.0632 |
| YRI | HIST2 | 149389459 | 7.5779  | 7.5628  | 0.0058  |
| YRI | HIST2 | 149394459 | 5.0741  | 6.7225  | -0.7103 |
| YRI | HIST2 | 149399459 | 6.8782  | 8.7392  | -0.6308 |
| YRI | HIST2 | 149404459 | 7.1835  | 9.4115  | -0.7051 |
| YRI | HIST2 | 149409459 | 4.0802  | 6.3864  | -1.0409 |
| YRI | HIST2 | 149414459 | 5.4012  | 6.5544  | -0.5084 |
| YRI | HIST2 | 149419459 | 5.2146  | 5.0419  | 0.0962  |
| YRI | HIST2 | 149424459 | 2.6292  | 3.3612  | -0.5783 |
| YRI | HIST2 | 149429459 | 2.8596  | 4.5377  | -1.0254 |
| YRI | HIST2 | 149434459 | 1.9528  | 2.5209  | -0.5689 |
| YRI | HIST2 | 149439459 | 0.0278  | 0.3361  | -1.2377 |
| YRI | HIST2 | 149444459 | 0.1661  | 0.5042  | -1.0625 |
| YRI | HIST2 | 149449459 | 0.1661  | 0.6722  | -1.3249 |
| YRI | HIST2 | 149454459 | 0.5774  | 1.6806  | -1.5177 |
| YRI | HIST2 | 149459459 | 0.5589  | 1.3445  | -1.276  |
| YRI | HIST2 | 149464459 | 0       | 0       | 0       |
| YRI | HIST2 | 149469459 | 0       | 0       | 0       |
| YRI | HIST2 | 149474459 | 0       | 0       | 0       |
| YRI | HIST2 | 149479459 | 0       | 0       | 0       |
| YRI | HIST2 | 149484459 | 0       | 0       | 0       |
| YRI | HIST2 | 149489459 | 0       | 0       | 0       |
| YRI | HIST2 | 149494459 | 0       | 0       | 0       |
| YRI | HIST2 | 149499459 | 0       | 0       | 0       |
| YRI | HIST2 | 149504459 | 0       | 0       | 0       |
| YRI | HIST2 | 149509459 | 0.6582  | 1.8487  | -1.5228 |
| YRI | HIST2 | 149514459 | 0.8557  | 2.3529  | -1.5849 |
| YRI | HIST2 | 149519459 | 0.2427  | 0.6722  | -1.1244 |
| YRI | HIST2 | 149524459 | 0.0453  | 0.1681  | -0.73   |
| YRI | HIST2 | 149529459 | 0.2339  | 0.5042  | -0.8495 |
| YRI | HIST2 | 149534459 | 0.2339  | 0.5042  | -0.8495 |
| YRI | HIST2 | 149539459 | 0       | 0       | 0       |
| YRI | HIST2 | 149544459 | 0       | 0       | 0       |
| YRI | HIST2 | 149549459 | 0       | 0       | 0       |
| YRI | HIST2 | 149554459 | 0       | 0       | 0       |
| YRI | HIST2 | 149559459 | 0       | 0       | 0       |

## 2\_TajimasD\_data

|     |       |           |         |         |         |
|-----|-------|-----------|---------|---------|---------|
| YRI | HIST2 | 149564459 | 0.0093  | 0.1681  | -0.944  |
| YRI | HIST2 | 149569459 | 0.6355  | 0.6722  | -0.0961 |
| YRI | HIST2 | 149574459 | 1.1006  | 1.5126  | -0.6135 |
| YRI | HIST2 | 149579459 | 1.4095  | 3.6974  | -1.6676 |
| YRI | HIST2 | 149584459 | 2.5283  | 5.378   | -1.4997 |
| YRI | HIST2 | 149589459 | 2.228   | 4.2016  | -1.2892 |
| YRI | HIST2 | 149594459 | 2.1559  | 3.1932  | -0.8555 |
| YRI | HIST2 | 149599459 | 3.294   | 3.1932  | 0.0831  |
| YRI | HIST2 | 149604459 | 5.2471  | 5.5461  | -0.1531 |
| YRI | HIST2 | 149609459 | 5.3652  | 7.0586  | -0.6981 |
| YRI | HIST2 | 149614459 | 1.8911  | 3.0251  | -0.9783 |
| YRI | HIST2 | 149619459 | 0       | 0       | 0       |
| YRI | HIST2 | 149624459 | 0       | 0       | 0       |
| YRI | HIST2 | 149629459 | 0.0093  | 0.1681  | -0.944  |
| YRI | HIST2 | 149634459 | 0.3558  | 0.8403  | -1.0943 |
| YRI | HIST2 | 149639459 | 3.2063  | 2.689   | 0.4916  |
| YRI | HIST2 | 149644459 | 7.2436  | 7.2267  | 0.0068  |
| YRI | HIST2 | 149649459 | 9.8555  | 10.756  | -0.2516 |
| YRI | HIST2 | 149654459 | 8.1051  | 8.9073  | -0.2672 |
| YRI | HIST2 | 149659459 | 5.9006  | 6.5544  | -0.2882 |
| YRI | HIST2 | 149664459 | 8.7336  | 9.0754  | -0.1119 |
| YRI | HIST2 | 149669459 | 10.9207 | 14.7895 | -0.8003 |
| YRI | HIST2 | 149674459 | 8.0915  | 12.7727 | -1.1129 |
| YRI | HIST2 | 149679459 | 5.6964  | 9.5795  | -1.2089 |
| YRI | HIST2 | 149684459 | 4.4759  | 9.4115  | -1.5621 |
| YRI | HIST2 | 149689459 | 2.7485  | 7.3947  | -1.836  |
| YRI | HIST2 | 149694459 | 4.0113  | 7.3947  | -1.337  |
| YRI | HIST2 | 149699459 | 6.144   | 7.8989  | -0.6529 |
| YRI | HIST2 | 149704459 | 8.7003  | 11.5963 | -0.7541 |
| YRI | HIST2 | 149709459 | 8.3155  | 12.7727 | -1.0596 |
| YRI | HIST2 | 149714459 | 8.0815  | 11.5963 | -0.9153 |
| YRI | HIST2 | 149719459 | 9.2653  | 12.7727 | -0.8338 |
| YRI | HIST2 | 149724459 | 9.0132  | 12.9408 | -0.9223 |
| YRI | HIST2 | 149729459 | 8.0748  | 12.4366 | -1.0634 |
| YRI | HIST2 | 149734459 | 6.3229  | 10.4199 | -1.1794 |
| YRI | HIST2 | 149739459 | 4.0556  | 7.2267  | -1.2796 |
| YRI | HIST2 | 149744459 | 6.3476  | 7.2267  | -0.3547 |
| YRI | HIST2 | 149749459 | 7.2433  | 8.4031  | -0.4076 |
| YRI | HIST2 | 149754459 | 3.8133  | 6.5544  | -1.2085 |
| YRI | HIST2 | 149759459 | 6.4196  | 10.2518 | -1.1201 |
| YRI | HIST2 | 149764459 | 5.3634  | 10.2518 | -1.4288 |
| YRI | HIST2 | 149769459 | 3.7942  | 9.2434  | -1.7537 |
| YRI | HIST2 | 149774459 | 6.5177  | 13.1089 | -1.5289 |
| YRI | HIST2 | 149779459 | 5.5616  | 12.2685 | -1.6563 |
| YRI | HIST2 | 149784459 | 3.7895  | 12.2685 | -2.0939 |
| YRI | HIST2 | 149789459 | 3.685   | 9.5795  | -1.8351 |
| YRI | HIST2 | 149794459 | 1.9758  | 3.3612  | -1.0945 |
| YRI | HIST2 | 149799459 | 0.0456  | 0.1681  | -0.7282 |
| YRI | HIST2 | 149804459 | 0       | 0       | 0       |

## 2\_TajimasD\_data

|     |       |           |         |         |         |
|-----|-------|-----------|---------|---------|---------|
| YRI | HIST2 | 149809459 | 0.0641  | 0.3361  | -1.092  |
| YRI | HIST2 | 149814459 | 3.5538  | 6.3864  | -1.2784 |
| YRI | HIST2 | 149819459 | 4.9907  | 8.235   | -1.1616 |
| YRI | HIST2 | 149824459 | 1.9828  | 2.3529  | -0.3918 |
| YRI | HIST2 | 149829459 | 0.4817  | 0.1681  | 1.8643  |
| YRI | HIST2 | 149834459 | 0       | 0       | 0       |
| YRI | HIST2 | 149839459 | 0.229   | 0.5042  | -0.8649 |
| YRI | HIST2 | 149844459 | 2.8358  | 5.5461  | -1.3879 |
| YRI | HIST2 | 149849459 | 4.9206  | 11.5963 | -1.7384 |
| YRI | HIST2 | 149854459 | 3.8866  | 12.1005 | -2.055  |
| YRI | HIST2 | 149859459 | 4.2297  | 11.7644 | -1.9357 |
| YRI | HIST2 | 149864459 | 7.48    | 12.9408 | -1.2823 |
| YRI | HIST2 | 149869459 | 7.7677  | 12.9408 | -1.2147 |
| YRI | HIST2 | 149874459 | 4.2439  | 10.0837 | -1.7333 |
| YRI | HIST2 | 149879459 | 7.4204  | 11.4282 | -1.0581 |
| YRI | HIST2 | 149884459 | 8.7712  | 12.6047 | -0.9228 |
| YRI | HIST2 | 149889459 | 5.9315  | 12.6047 | -1.6064 |
| YRI | HIST2 | 149894459 | 5.2168  | 11.9324 | -1.7024 |
| YRI | HIST2 | 149899459 | 3.3737  | 11.0921 | -2.0956 |
| YRI | HIST2 | 149904459 | 5.0117  | 12.1005 | -1.7735 |
| YRI | HIST2 | 149909459 | 7.5325  | 12.4366 | -1.1956 |
| YRI | HIST2 | 149914459 | 5.6678  | 12.6047 | -1.6699 |
| YRI | HIST2 | 149919459 | 6.1358  | 12.9408 | -1.5979 |
| YRI | HIST2 | 149924459 | 8.9531  | 13.9492 | -1.0926 |
| YRI | HIST2 | 149929459 | 8.2737  | 13.445  | -1.1711 |
| YRI | HIST2 | 149934459 | 8.5618  | 12.6047 | -0.9732 |
| YRI | HIST2 | 149939459 | 8.1615  | 11.2602 | -0.8295 |
| YRI | HIST2 | 149944459 | 5.6624  | 9.2434  | -1.1525 |
| YRI | HIST2 | 149949459 | 6.0382  | 9.9157  | -1.1691 |
| YRI | HIST2 | 149954459 | 7.9667  | 11.9324 | -1.0053 |
| YRI | HIST2 | 149959459 | 6.2213  | 10.2518 | -1.178  |
| YRI | HIST2 | 149964459 | 4.5833  | 8.7392  | -1.4087 |
| YRI | HIST2 | 149969459 | 6.345   | 8.9073  | -0.8534 |
| YRI | HIST2 | 149974459 | 7.9168  | 9.7476  | -0.5608 |
| YRI | HIST2 | 149979459 | 7.1759  | 9.9157  | -0.8261 |
| YRI | HIST2 | 149984459 | 8.7389  | 11.7644 | -0.7773 |
| YRI | HIST2 | 149989459 | 9.2394  | 13.2769 | -0.9253 |
| YRI | HIST2 | 149994459 | 12.1353 | 14.9575 | -0.5776 |
| YRI | HIST2 | 149999459 | 14.8793 | 15.2937 | -0.083  |
| YRI | HIST2 | 150004459 | 10.8959 | 13.1089 | -0.5133 |
| YRI | HIST2 | 150009459 | 13.8234 | 17.1423 | -0.5963 |
| YRI | HIST2 | 150014459 | 16.3391 | 17.8146 | -0.2555 |
| YRI | HIST2 | 150019459 | 13.0491 | 14.2853 | -0.2643 |
| YRI | HIST2 | 150024459 | 13.1477 | 15.2937 | -0.43   |
| YRI | HIST2 | 150029459 | 11.2213 | 12.9408 | -0.4038 |
| YRI | HIST2 | 150034459 | 7.6433  | 10.756  | -0.8698 |
| YRI | HIST2 | 150039459 | 10.394  | 14.7895 | -0.9093 |
| YRI | HIST2 | 150044459 | 12.7762 | 15.2937 | -0.5044 |
| YRI | HIST2 | 150049459 | 8.6399  | 12.1005 | -0.8658 |

## 2\_TajimasD\_data

|     |       |           |         |         |         |
|-----|-------|-----------|---------|---------|---------|
| YRI | HIST2 | 150054459 | 6.9081  | 12.7727 | -1.3942 |
| YRI | HIST2 | 150059459 | 8.5104  | 13.7811 | -1.166  |
| YRI | HIST2 | 150064459 | 8.5689  | 12.1005 | -0.8835 |
| YRI | HIST2 | 150069459 | 9.3262  | 13.2769 | -0.9054 |
| YRI | HIST2 | 150074459 | 10.1852 | 15.2937 | -1.0236 |
| YRI | HIST2 | 150079459 | 10.7654 | 15.9659 | -1.0001 |
| YRI | HIST2 | 150084459 | 12.5056 | 15.6298 | -0.6131 |
| YRI | HIST2 | 150089459 | 14.3191 | 15.6298 | -0.2572 |
| YRI | HIST2 | 150094459 | 13.3286 | 15.9659 | -0.5072 |
| YRI | HIST2 | 150099459 | 12.296  | 14.2853 | -0.4253 |
| YRI | HIST2 | 150104459 | 12.2694 | 16.134  | -0.7358 |
| YRI | HIST2 | 150109459 | 10.1388 | 15.6298 | -1.0777 |
| YRI | HIST2 | 150114459 | 8.7173  | 14.1172 | -1.1676 |
| YRI | HIST2 | 150119459 | 7.6213  | 14.4534 | -1.4446 |
| YRI | HIST2 | 150124459 | 7.8355  | 13.9492 | -1.3371 |
| YRI | HIST2 | 150129459 | 10.6789 | 16.134  | -1.0386 |
| YRI | HIST2 | 150134459 | 12.2996 | 17.8146 | -0.955  |
| YRI | HIST2 | 150139459 | 12.0414 | 17.3104 | -0.9379 |
| YRI | HIST2 | 150144459 | 10.0938 | 14.2853 | -0.8962 |
| YRI | HIST2 | 150149459 | 9.2867  | 12.2685 | -0.7363 |
| YRI | HIST2 | 150154459 | 11.4496 | 13.2769 | -0.4188 |
| YRI | HIST2 | 150159459 | 16.6998 | 19.3272 | -0.4207 |
| YRI | HIST2 | 150164459 | 16.9757 | 19.4952 | -0.4001 |
| YRI | HIST2 | 150169459 | 12.5241 | 15.9659 | -0.6619 |
| YRI | HIST2 | 150174459 | 11.9003 | 15.4617 | -0.7062 |
| YRI | HIST2 | 150179459 | 12.3152 | 13.445  | -0.2559 |
| YRI | HIST2 | 150184459 | 11.3191 | 14.4534 | -0.6627 |
| YRI | HIST2 | 150189459 | 8.8071  | 12.1005 | -0.8239 |
| YRI | HIST2 | 150194459 | 8.4306  | 9.7476  | -0.4034 |
| YRI | HIST2 | 150199459 | 10.4735 | 10.756  | -0.0789 |
| YRI | HIST2 | 150204459 | 10.6374 | 11.0921 | -0.1235 |
| YRI | HIST2 | 150209459 | 13.4833 | 14.9575 | -0.3017 |
| YRI | HIST2 | 150214459 | 14.2423 | 15.2937 | -0.2107 |
| YRI | HIST2 | 150219459 | 10.5734 | 11.2602 | -0.1839 |
| YRI | HIST2 | 150224459 | 7.723   | 9.7476  | -0.6202 |
| YRI | HIST2 | 150229459 | 4.0713  | 8.4031  | -1.5225 |
| YRI | HIST2 | 150234459 | 2.9267  | 6.8906  | -1.6703 |
| YRI | HIST2 | 150239459 | 4.1672  | 7.3947  | -1.2754 |
| YRI | HIST2 | 150244459 | 5.1575  | 10.5879 | -1.54   |
| YRI | HIST2 | 150249459 | 5.9107  | 10.756  | -1.354  |
| YRI | HIST2 | 150254459 | 7.4465  | 9.5795  | -0.6641 |
| YRI | HIST2 | 150259459 | 11.3215 | 10.756  | 0.158   |
| YRI | HIST2 | 150264459 | 16.0956 | 14.4534 | 0.3472  |
| YRI | HIST2 | 150269459 | 18.2561 | 17.6465 | 0.1065  |
| YRI | HIST2 | 150274459 | 15.8191 | 17.3104 | -0.2654 |
| YRI | HIST2 | 150279459 | 14.1404 | 15.4617 | -0.262  |
| YRI | HIST2 | 150284459 | 12.4261 | 12.6047 | -0.043  |
| YRI | HIST2 | 150289459 | 10.0521 | 11.7644 | -0.4399 |
| YRI | HIST2 | 150294459 | 10.7521 | 13.445  | -0.6099 |

## 2\_TajimasD\_data

|     |       |           |         |         |         |
|-----|-------|-----------|---------|---------|---------|
| YRI | HIST2 | 150299459 | 11.7498 | 13.9492 | -0.481  |
| YRI | HIST2 | 150304459 | 10.8566 | 12.7727 | -0.4555 |
| YRI | HIST2 | 150309459 | 10.9874 | 12.9408 | -0.4587 |
| YRI | HIST2 | 150314459 | 12.4443 | 13.445  | -0.2266 |
| YRI | HIST2 | 150319459 | 15.0185 | 14.9575 | 0.0125  |
| YRI | HIST2 | 150324459 | 12.9782 | 14.4534 | -0.3119 |
| YRI | HIST2 | 150329459 | 11.987  | 13.1089 | -0.2602 |
| YRI | HIST2 | 150334459 | 12.213  | 13.7811 | -0.3469 |
| YRI | HIST2 | 150339459 | 10.752  | 12.7727 | -0.4804 |
| YRI | HIST2 | 150344459 | 11.873  | 11.4282 | 0.1174  |
| YRI | HIST2 | 150349459 | 9.9633  | 11.5963 | -0.4252 |
| YRI | HIST2 | 150354459 | 12.4912 | 14.1172 | -0.3516 |
| YRI | HIST2 | 150359459 | 15.7362 | 14.9575 | 0.1594  |
| YRI | HIST2 | 150364459 | 13.8457 | 13.445  | 0.0907  |
| YRI | HIST2 | 150369459 | 13.8327 | 15.7978 | -0.3817 |
| YRI | HIST2 | 150374459 | 15.494  | 16.9743 | -0.2685 |
| YRI | HIST2 | 150379459 | 15.7388 | 16.302  | -0.1062 |
| CEU | HIST2 | 149391918 | 6.3327  | 5.9697  | 0.1752  |
| CEU | HIST2 | 149396918 | 4.7877  | 5.458   | -0.3504 |
| CEU | HIST2 | 149401918 | 5.9322  | 5.9697  | -0.0181 |
| CEU | HIST2 | 149406918 | 5.0408  | 5.1169  | -0.0421 |
| CEU | HIST2 | 149411918 | 3.6555  | 2.8996  | 0.6798  |
| CEU | HIST2 | 149416918 | 4.1068  | 3.2407  | 0.7102  |
| CEU | HIST2 | 149421918 | 2.5749  | 2.2173  | 0.3995  |
| CEU | HIST2 | 149426918 | 2.7172  | 2.729   | -0.0112 |
| CEU | HIST2 | 149431918 | 2.3515  | 2.729   | -0.3568 |
| CEU | HIST2 | 149436918 | 0.5232  | 0.6822  | -0.4152 |
| CEU | HIST2 | 149441918 | 0       | 0       | 0       |
| CEU | HIST2 | 149446918 | 0.08    | 0.5117  | -1.3539 |
| CEU | HIST2 | 149451918 | 0.1394  | 0.8528  | -1.6066 |
| CEU | HIST2 | 149456918 | 0.128   | 0.6822  | -1.4472 |
| CEU | HIST2 | 149461918 | 0.0686  | 0.3411  | -1.0924 |
| CEU | HIST2 | 149466918 | 0       | 0       | 0       |
| CEU | HIST2 | 149471918 | 0       | 0       | 0       |
| CEU | HIST2 | 149476918 | 0       | 0       | 0       |
| CEU | HIST2 | 149481918 | 0       | 0       | 0       |
| CEU | HIST2 | 149486918 | 0       | 0       | 0       |
| CEU | HIST2 | 149491918 | 0       | 0       | 0       |
| CEU | HIST2 | 149496918 | 0       | 0       | 0       |
| CEU | HIST2 | 149501918 | 0       | 0       | 0       |
| CEU | HIST2 | 149506918 | 0.1363  | 0.5117  | -1.1774 |
| CEU | HIST2 | 149511918 | 0.4605  | 1.1939  | -1.3069 |
| CEU | HIST2 | 149516918 | 0.3243  | 0.6822  | -0.9346 |
| CEU | HIST2 | 149521918 | 0       | 0       | 0       |
| CEU | HIST2 | 149526918 | 0       | 0       | 0       |
| CEU | HIST2 | 149531918 | 0.0101  | 0.1706  | -0.9534 |
| CEU | HIST2 | 149536918 | 0.0101  | 0.1706  | -0.9534 |
| CEU | HIST2 | 149541918 | 0       | 0       | 0       |
| CEU | HIST2 | 149546918 | 0       | 0       | 0       |



## 2\_TajimasD\_data

|     |       |           |         |        |         |
|-----|-------|-----------|---------|--------|---------|
| CEU | HIST2 | 149551918 | 0       | 0      | 0       |
| CEU | HIST2 | 149556918 | 0       | 0      | 0       |
| CEU | HIST2 | 149561918 | 0       | 0      | 0       |
| CEU | HIST2 | 149566918 | 0       | 0      | 0       |
| CEU | HIST2 | 149571918 | 0.885   | 0.6822 | 0.5296  |
| CEU | HIST2 | 149576918 | 0.885   | 0.6822 | 0.5296  |
| CEU | HIST2 | 149581918 | 2.8182  | 3.2407 | -0.3464 |
| CEU | HIST2 | 149586918 | 3.8     | 3.7524 | 0.0345  |
| CEU | HIST2 | 149591918 | 1.7355  | 1.3645 | 0.6002  |
| CEU | HIST2 | 149596918 | 2.012   | 2.729  | -0.6777 |
| CEU | HIST2 | 149601918 | 6.1911  | 4.9463 | 0.7099  |
| CEU | HIST2 | 149606918 | 7.4409  | 4.6052 | 1.7217  |
| CEU | HIST2 | 149611918 | 3.874   | 2.3879 | 1.565   |
| CEU | HIST2 | 149616918 | 1.3659  | 0.8528 | 1.1555  |
| CEU | HIST2 | 149621918 | 0       | 0      | 0       |
| CEU | HIST2 | 149626918 | 0.0301  | 0.1706 | -0.8346 |
| CEU | HIST2 | 149631918 | 0.0301  | 0.1706 | -0.8346 |
| CEU | HIST2 | 149636918 | 2.3997  | 1.7056 | 0.9507  |
| CEU | HIST2 | 149641918 | 3.1783  | 2.729  | 0.4247  |
| CEU | HIST2 | 149646918 | 5.8648  | 5.9697 | -0.0506 |
| CEU | HIST2 | 149651918 | 8.469   | 6.9931 | 0.6175  |
| CEU | HIST2 | 149656918 | 5.9615  | 3.9229 | 1.4219  |
| CEU | HIST2 | 149661918 | 6.0134  | 6.3108 | -0.1365 |
| CEU | HIST2 | 149666918 | 5.1377  | 9.0398 | -1.2901 |
| CEU | HIST2 | 149671918 | 4.6613  | 8.8692 | -1.416  |
| CEU | HIST2 | 149676918 | 5.5595  | 7.3342 | -0.7111 |
| CEU | HIST2 | 149681918 | 3.2579  | 4.9463 | -0.9629 |
| CEU | HIST2 | 149686918 | 0.9285  | 3.2407 | -1.896  |
| CEU | HIST2 | 149691918 | 1.3713  | 3.2407 | -1.5329 |
| CEU | HIST2 | 149696918 | 2.9058  | 5.2874 | -1.2806 |
| CEU | HIST2 | 149701918 | 4.5174  | 6.3108 | -0.8234 |
| CEU | HIST2 | 149706918 | 7.1126  | 6.8225 | 0.1241  |
| CEU | HIST2 | 149711918 | 8.3743  | 7.6753 | 0.2687  |
| CEU | HIST2 | 149716918 | 11.1891 | 8.8692 | 0.7807  |
| CEU | HIST2 | 149721918 | 10.4432 | 7.5047 | 1.1529  |
| CEU | HIST2 | 149726918 | 6.2684  | 5.9697 | 0.1442  |
| CEU | HIST2 | 149731918 | 5.9891  | 5.7991 | 0.0941  |
| CEU | HIST2 | 149736918 | 3.8417  | 4.0935 | -0.1693 |
| CEU | HIST2 | 149741918 | 1.746   | 2.8996 | -1.0375 |
| CEU | HIST2 | 149746918 | 4.6417  | 3.9229 | 0.5013  |
| CEU | HIST2 | 149751918 | 3.9182  | 3.5818 | 0.2535  |
| CEU | HIST2 | 149756918 | 1.7541  | 3.0701 | -1.1288 |
| CEU | HIST2 | 149761918 | 2.4993  | 5.2874 | -1.4992 |
| CEU | HIST2 | 149766918 | 1.7405  | 5.1169 | -1.8689 |
| CEU | HIST2 | 149771918 | 3.0118  | 5.458  | -1.2788 |
| CEU | HIST2 | 149776918 | 4.9843  | 6.8225 | -0.7866 |
| CEU | HIST2 | 149781918 | 5.411   | 7.8459 | -0.9173 |
| CEU | HIST2 | 149786918 | 4.1148  | 7.3342 | -1.2899 |
| CEU | HIST2 | 149791918 | 1.7159  | 3.4112 | -1.3315 |

## 2\_TajimasD\_data

|     |       |           |         |        |         |
|-----|-------|-----------|---------|--------|---------|
| CEU | HIST2 | 149796918 | 0.1727  | 0.3411 | -0.6751 |
| CEU | HIST2 | 149801918 | 0       | 0      | 0       |
| CEU | HIST2 | 149806918 | 0       | 0      | 0       |
| CEU | HIST2 | 149811918 | 1.1765  | 1.7056 | -0.7247 |
| CEU | HIST2 | 149816918 | 2.6098  | 3.9229 | -0.9158 |
| CEU | HIST2 | 149821918 | 2.0299  | 2.729  | -0.6608 |
| CEU | HIST2 | 149826918 | 0.5966  | 0.5117 | 0.2663  |
| CEU | HIST2 | 149831918 | 0       | 0      | 0       |
| CEU | HIST2 | 149836918 | 0       | 0      | 0       |
| CEU | HIST2 | 149841918 | 0.6976  | 1.1939 | -0.8844 |
| CEU | HIST2 | 149846918 | 2.0016  | 3.7524 | -1.2684 |
| CEU | HIST2 | 149851918 | 2.5624  | 5.458  | -1.5138 |
| CEU | HIST2 | 149856918 | 2.4302  | 5.9697 | -1.7082 |
| CEU | HIST2 | 149861918 | 3.7472  | 7.3342 | -1.4372 |
| CEU | HIST2 | 149866918 | 5.3771  | 9.0398 | -1.211  |
| CEU | HIST2 | 149871918 | 4.9114  | 7.6753 | -1.0624 |
| CEU | HIST2 | 149876918 | 3.898   | 6.3108 | -1.1078 |
| CEU | HIST2 | 149881918 | 2.6912  | 5.1169 | -1.3427 |
| CEU | HIST2 | 149886918 | 2.5022  | 4.0935 | -1.07   |
| CEU | HIST2 | 149891918 | 3.1911  | 4.2641 | -0.6965 |
| CEU | HIST2 | 149896918 | 3.3513  | 5.2874 | -1.041  |
| CEU | HIST2 | 149901918 | 3.5364  | 5.6286 | -1.0642 |
| CEU | HIST2 | 149906918 | 3.5805  | 5.458  | -0.9815 |
| CEU | HIST2 | 149911918 | 2.3566  | 4.9463 | -1.4769 |
| CEU | HIST2 | 149916918 | 1.7032  | 3.9229 | -1.5482 |
| CEU | HIST2 | 149921918 | 3.0085  | 4.6052 | -0.9694 |
| CEU | HIST2 | 149926918 | 4.4133  | 5.6286 | -0.6182 |
| CEU | HIST2 | 149931918 | 3.3523  | 6.3108 | -1.3583 |
| CEU | HIST2 | 149936918 | 2.221   | 4.9463 | -1.5542 |
| CEU | HIST2 | 149941918 | 2.6215  | 3.7524 | -0.8193 |
| CEU | HIST2 | 149946918 | 2.2579  | 4.2641 | -1.3023 |
| CEU | HIST2 | 149951918 | 2.9711  | 5.7991 | -1.4007 |
| CEU | HIST2 | 149956918 | 2.1484  | 4.4346 | -1.4344 |
| CEU | HIST2 | 149961918 | 1.012   | 2.5584 | -1.5405 |
| CEU | HIST2 | 149966918 | 1.7765  | 3.2407 | -1.2006 |
| CEU | HIST2 | 149971918 | 2.1725  | 3.7524 | -1.1446 |
| CEU | HIST2 | 149976918 | 2.215   | 3.9229 | -1.1912 |
| CEU | HIST2 | 149981918 | 2.6574  | 4.9463 | -1.3054 |
| CEU | HIST2 | 149986918 | 3.665   | 5.9697 | -1.1123 |
| CEU | HIST2 | 149991918 | 5.9705  | 7.3342 | -0.5464 |
| CEU | HIST2 | 149996918 | 9.5316  | 8.6987 | 0.2853  |
| CEU | HIST2 | 150001918 | 8.4541  | 7.3342 | 0.4487  |
| CEU | HIST2 | 150006918 | 7.4292  | 7.1636 | 0.1087  |
| CEU | HIST2 | 150011918 | 10.6844 | 8.8692 | 0.6108  |
| CEU | HIST2 | 150016918 | 11.1148 | 9.2104 | 0.6188  |
| CEU | HIST2 | 150021918 | 9.0223  | 8.0164 | 0.3715  |
| CEU | HIST2 | 150026918 | 5.7079  | 5.9697 | -0.1263 |
| CEU | HIST2 | 150031918 | 2.2519  | 4.4346 | -1.3695 |
| CEU | HIST2 | 150036918 | 3.0062  | 5.7991 | -1.3833 |

## 2\_TajimasD\_data

|     |       |           |         |         |         |
|-----|-------|-----------|---------|---------|---------|
| CEU | HIST2 | 150041918 | 3.7549  | 5.9697  | -1.0689 |
| CEU | HIST2 | 150046918 | 4.4902  | 5.6286  | -0.5791 |
| CEU | HIST2 | 150051918 | 3.912   | 5.2874  | -0.7396 |
| CEU | HIST2 | 150056918 | 2.1128  | 4.4346  | -1.4568 |
| CEU | HIST2 | 150061918 | 3.0357  | 4.9463  | -1.0896 |
| CEU | HIST2 | 150066918 | 1.987   | 3.2407  | -1.028  |
| CEU | HIST2 | 150071918 | 5.2461  | 5.1169  | 0.0715  |
| CEU | HIST2 | 150076918 | 7.7223  | 7.5047  | 0.0854  |
| CEU | HIST2 | 150081918 | 3.2894  | 5.7991  | -1.243  |
| CEU | HIST2 | 150086918 | 2.8062  | 6.6519  | -1.6837 |
| CEU | HIST2 | 150091918 | 4.1495  | 6.4814  | -1.0452 |
| CEU | HIST2 | 150096918 | 4.2863  | 5.458   | -0.6125 |
| CEU | HIST2 | 150101918 | 4.8773  | 6.8225  | -0.8323 |
| CEU | HIST2 | 150106918 | 5.9415  | 6.6519  | -0.311  |
| CEU | HIST2 | 150111918 | 5.7025  | 5.7991  | -0.0478 |
| CEU | HIST2 | 150116918 | 3.3577  | 4.6052  | -0.7574 |
| CEU | HIST2 | 150121918 | 3.1707  | 5.7991  | -1.3018 |
| CEU | HIST2 | 150126918 | 5.0276  | 8.0164  | -1.1039 |
| CEU | HIST2 | 150131918 | 6.5195  | 9.0398  | -0.8333 |
| CEU | HIST2 | 150136918 | 7.2158  | 11.9394 | -1.2043 |
| CEU | HIST2 | 150141918 | 6.1897  | 9.5515  | -1.0561 |
| CEU | HIST2 | 150146918 | 5.0423  | 6.3108  | -0.5824 |
| CEU | HIST2 | 150151918 | 3.5471  | 7.3342  | -1.5174 |
| CEU | HIST2 | 150156918 | 4.9324  | 8.8692  | -1.3247 |
| CEU | HIST2 | 150161918 | 8.7335  | 9.7221  | -0.3055 |
| CEU | HIST2 | 150166918 | 9.5873  | 8.0164  | 0.5802  |
| CEU | HIST2 | 150171918 | 7.8149  | 6.6519  | 0.5092  |
| CEU | HIST2 | 150176918 | 6.9083  | 5.9697  | 0.453   |
| CEU | HIST2 | 150181918 | 8.2573  | 6.4814  | 0.796   |
| CEU | HIST2 | 150186918 | 6.5504  | 6.3108  | 0.11    |
| CEU | HIST2 | 150191918 | 5.8106  | 5.9697  | -0.0768 |
| CEU | HIST2 | 150196918 | 7.2738  | 6.3108  | 0.4421  |
| CEU | HIST2 | 150201918 | 9.2791  | 7.1636  | 0.866   |
| CEU | HIST2 | 150206918 | 10.2387 | 8.3576  | 0.6687  |
| CEU | HIST2 | 150211918 | 8.2839  | 6.9931  | 0.5401  |
| CEU | HIST2 | 150216918 | 8.296   | 6.4814  | 0.8133  |
| CEU | HIST2 | 150221918 | 7.7446  | 6.4814  | 0.5662  |
| CEU | HIST2 | 150226918 | 3.5176  | 4.6052  | -0.6603 |
| CEU | HIST2 | 150231918 | 2.2224  | 3.5818  | -1.0246 |
| CEU | HIST2 | 150236918 | 2.9215  | 2.8996  | 0.0197  |
| CEU | HIST2 | 150241918 | 2.7673  | 3.7524  | -0.7137 |
| CEU | HIST2 | 150246918 | 5.4009  | 5.6286  | -0.1158 |
| CEU | HIST2 | 150251918 | 5.4519  | 5.2874  | 0.0885  |
| CEU | HIST2 | 150256918 | 6.9371  | 6.6519  | 0.1249  |
| CEU | HIST2 | 150261918 | 14.4618 | 8.8692  | 1.8819  |
| CEU | HIST2 | 150266918 | 19.5147 | 10.916  | 2.3848  |
| CEU | HIST2 | 150271918 | 16.9402 | 11.7688 | 1.3365  |
| CEU | HIST2 | 150276918 | 14.3911 | 10.916  | 0.9638  |
| CEU | HIST2 | 150281918 | 15.4428 | 10.916  | 1.2555  |

## 2\_TajimasD\_data

|     |       |           |         |         |         |
|-----|-------|-----------|---------|---------|---------|
| CEU | HIST2 | 150286918 | 12.0742 | 8.187   | 1.4082  |
| CEU | HIST2 | 150291918 | 10.1462 | 7.1636  | 1.2209  |
| CEU | HIST2 | 150296918 | 9.6301  | 7.8459  | 0.6721  |
| CEU | HIST2 | 150301918 | 7.9921  | 7.3342  | 0.2636  |
| CEU | HIST2 | 150306918 | 9.4628  | 8.3576  | 0.3929  |
| CEU | HIST2 | 150311918 | 10.6891 | 9.5515  | 0.3574  |
| CEU | HIST2 | 150316918 | 12.7236 | 10.916  | 0.5013  |
| CEU | HIST2 | 150321918 | 13.1306 | 9.7221  | 1.0533  |
| CEU | HIST2 | 150326918 | 13.4522 | 9.3809  | 1.3006  |
| CEU | HIST2 | 150331918 | 12.9558 | 9.5515  | 1.0695  |
| CEU | HIST2 | 150336918 | 10.4048 | 9.2104  | 0.3881  |
| CEU | HIST2 | 150341918 | 9.3972  | 8.8692  | 0.1777  |
| CEU | HIST2 | 150346918 | 9.2597  | 7.6753  | 0.609   |
| CEU | HIST2 | 150351918 | 11.3979 | 9.2104  | 0.7108  |
| CEU | HIST2 | 150356918 | 14.2175 | 10.5749 | 1.0408  |
| CEU | HIST2 | 150361918 | 13.766  | 10.2337 | 1.0406  |
| CEU | HIST2 | 150366918 | 12.2263 | 10.5749 | 0.4718  |
| CEU | HIST2 | 150371918 | 13.0328 | 10.7454 | 0.6438  |
| CEU | HIST2 | 150376918 | 14.7998 | 11.5982 | 0.8388  |
| CEU | HIST2 | 150381918 | 13.7603 | 10.916  | 0.7889  |
| CHB | HIST2 | 149391918 | 4.9252  | 5.9295  | -0.4862 |
| CHB | HIST2 | 149396918 | 4.0455  | 5.2519  | -0.6506 |
| CHB | HIST2 | 149401918 | 4.8778  | 6.6072  | -0.7596 |
| CHB | HIST2 | 149406918 | 3.4877  | 5.0825  | -0.8854 |
| CHB | HIST2 | 149411918 | 3.3813  | 4.2354  | -0.556  |
| CHB | HIST2 | 149416918 | 4.2416  | 4.066   | 0.1184  |
| CHB | HIST2 | 149421918 | 2.0788  | 3.3883  | -1.0313 |
| CHB | HIST2 | 149426918 | 2.0093  | 4.066   | -1.3869 |
| CHB | HIST2 | 149431918 | 1.8957  | 3.2189  | -1.0879 |
| CHB | HIST2 | 149436918 | 0.4087  | 1.0165  | -1.2096 |
| CHB | HIST2 | 149441918 | 0       | 0       | 0       |
| CHB | HIST2 | 149446918 | 0.0386  | 0.5082  | -1.4741 |
| CHB | HIST2 | 149451918 | 0.1065  | 1.3553  | -2.0239 |
| CHB | HIST2 | 149456918 | 0.0873  | 1.1859  | -1.961  |
| CHB | HIST2 | 149461918 | 0.0194  | 0.3388  | -1.2812 |
| CHB | HIST2 | 149466918 | 0       | 0       | 0       |
| CHB | HIST2 | 149471918 | 0       | 0       | 0       |
| CHB | HIST2 | 149476918 | 0       | 0       | 0       |
| CHB | HIST2 | 149481918 | 0       | 0       | 0       |
| CHB | HIST2 | 149486918 | 0       | 0       | 0       |
| CHB | HIST2 | 149491918 | 0       | 0       | 0       |
| CHB | HIST2 | 149496918 | 0       | 0       | 0       |
| CHB | HIST2 | 149501918 | 0       | 0       | 0       |
| CHB | HIST2 | 149506918 | 0.6275  | 0.5082  | 0.3745  |
| CHB | HIST2 | 149511918 | 0.8968  | 1.0165  | -0.2382 |
| CHB | HIST2 | 149516918 | 0.2791  | 0.6777  | -1.0421 |
| CHB | HIST2 | 149521918 | 0.0097  | 0.1694  | -0.949  |
| CHB | HIST2 | 149526918 | 0       | 0       | 0       |
| CHB | HIST2 | 149531918 | 0.2578  | 0.1694  | 0.5253  |

## 2\_TajimasD\_data

|     |       |           |        |        |         |
|-----|-------|-----------|--------|--------|---------|
| CHB | HIST2 | 149536918 | 0.2578 | 0.1694 | 0.5253  |
| CHB | HIST2 | 149541918 | 0      | 0      | 0       |
| CHB | HIST2 | 149546918 | 0      | 0      | 0       |
| CHB | HIST2 | 149551918 | 0      | 0      | 0       |
| CHB | HIST2 | 149556918 | 0      | 0      | 0       |
| CHB | HIST2 | 149561918 | 0      | 0      | 0       |
| CHB | HIST2 | 149566918 | 0.0097 | 0.1694 | -0.949  |
| CHB | HIST2 | 149571918 | 0.9039 | 0.8471 | 0.1281  |
| CHB | HIST2 | 149576918 | 0.9039 | 0.8471 | 0.1281  |
| CHB | HIST2 | 149581918 | 3.3082 | 3.3883 | -0.0631 |
| CHB | HIST2 | 149586918 | 4.0702 | 3.8965 | 0.1215  |
| CHB | HIST2 | 149591918 | 1.2206 | 1.1859 | 0.0619  |
| CHB | HIST2 | 149596918 | 2.4835 | 2.033  | 0.5372  |
| CHB | HIST2 | 149601918 | 7.3181 | 4.5742 | 1.6708  |
| CHB | HIST2 | 149606918 | 7.0409 | 5.4213 | 0.8493  |
| CHB | HIST2 | 149611918 | 2.8014 | 3.0495 | -0.2134 |
| CHB | HIST2 | 149616918 | 1.044  | 0.6777 | 0.9576  |
| CHB | HIST2 | 149621918 | 0      | 0      | 0       |
| CHB | HIST2 | 149626918 | 0.0097 | 0.1694 | -0.949  |
| CHB | HIST2 | 149631918 | 0.0097 | 0.1694 | -0.949  |
| CHB | HIST2 | 149636918 | 2.8808 | 1.5247 | 2.0147  |
| CHB | HIST2 | 149641918 | 3.9928 | 3.5577 | 0.3288  |
| CHB | HIST2 | 149646918 | 5.9671 | 5.7601 | 0.1028  |
| CHB | HIST2 | 149651918 | 7.4036 | 6.0989 | 0.6159  |
| CHB | HIST2 | 149656918 | 4.6482 | 5.4213 | -0.4054 |
| CHB | HIST2 | 149661918 | 5.9966 | 5.4213 | 0.3017  |
| CHB | HIST2 | 149666918 | 7.7933 | 6.6072 | 0.5209  |
| CHB | HIST2 | 149671918 | 7.8681 | 7.9625 | -0.035  |
| CHB | HIST2 | 149676918 | 5.9629 | 6.0989 | -0.0642 |
| CHB | HIST2 | 149681918 | 3.2277 | 5.2519 | -1.0917 |
| CHB | HIST2 | 149686918 | 2.0524 | 4.4048 | -1.4802 |
| CHB | HIST2 | 149691918 | 3.198  | 4.2354 | -0.6753 |
| CHB | HIST2 | 149696918 | 4.4445 | 4.5742 | -0.079  |
| CHB | HIST2 | 149701918 | 5.1584 | 6.2684 | -0.5112 |
| CHB | HIST2 | 149706918 | 7.3682 | 7.6237 | -0.0985 |
| CHB | HIST2 | 149711918 | 7.0874 | 5.9295 | 0.5606  |
| CHB | HIST2 | 149716918 | 8.1498 | 8.6402 | -0.1686 |
| CHB | HIST2 | 149721918 | 8.3038 | 9.8261 | -0.4645 |
| CHB | HIST2 | 149726918 | 6.0784 | 8.3013 | -0.7928 |
| CHB | HIST2 | 149731918 | 5.7443 | 7.1154 | -0.5631 |
| CHB | HIST2 | 149736918 | 3.2926 | 4.4048 | -0.6999 |
| CHB | HIST2 | 149741918 | 1.0297 | 2.7106 | -1.5927 |
| CHB | HIST2 | 149746918 | 3.886  | 3.2189 | 0.5484  |
| CHB | HIST2 | 149751918 | 3.7042 | 3.2189 | 0.399   |
| CHB | HIST2 | 149756918 | 1.0577 | 5.2519 | -2.2621 |
| CHB | HIST2 | 149761918 | 2.0857 | 6.7766 | -2.0136 |
| CHB | HIST2 | 149766918 | 1.7815 | 4.4048 | -1.6507 |
| CHB | HIST2 | 149771918 | 1.3008 | 5.4213 | -2.1607 |
| CHB | HIST2 | 149776918 | 1.2696 | 5.2519 | -2.1478 |

## 2\_TajimasD\_data

|     |       |           |        |         |         |
|-----|-------|-----------|--------|---------|---------|
| CHB | HIST2 | 149781918 | 1.0246 | 4.5742  | -2.1614 |
| CHB | HIST2 | 149786918 | 0.7342 | 5.5907  | -2.4779 |
| CHB | HIST2 | 149791918 | 0.422  | 3.7271  | -2.4011 |
| CHB | HIST2 | 149796918 | 0.1805 | 1.0165  | -1.6637 |
| CHB | HIST2 | 149801918 | 0      | 0       | 0       |
| CHB | HIST2 | 149806918 | 0      | 0       | 0       |
| CHB | HIST2 | 149811918 | 0.4491 | 1.5247  | -1.598  |
| CHB | HIST2 | 149816918 | 1.2566 | 5.2519  | -2.1548 |
| CHB | HIST2 | 149821918 | 1.193  | 4.066   | -1.9374 |
| CHB | HIST2 | 149826918 | 0.3855 | 0.3388  | 0.1873  |
| CHB | HIST2 | 149831918 | 0      | 0       | 0       |
| CHB | HIST2 | 149836918 | 0      | 0       | 0       |
| CHB | HIST2 | 149841918 | 0.0771 | 0.8471  | -1.7363 |
| CHB | HIST2 | 149846918 | 0.5099 | 4.4048  | -2.4509 |
| CHB | HIST2 | 149851918 | 1.1086 | 8.1319  | -2.5528 |
| CHB | HIST2 | 149856918 | 1.0769 | 6.0989  | -2.3706 |
| CHB | HIST2 | 149861918 | 1.3765 | 5.9295  | -2.2042 |
| CHB | HIST2 | 149866918 | 1.5623 | 7.2848  | -2.3003 |
| CHB | HIST2 | 149871918 | 1.0129 | 5.9295  | -2.3802 |
| CHB | HIST2 | 149876918 | 1.6109 | 6.7766  | -2.2175 |
| CHB | HIST2 | 149881918 | 1.8576 | 7.1154  | -2.1592 |
| CHB | HIST2 | 149886918 | 1.2475 | 5.7601  | -2.242  |
| CHB | HIST2 | 149891918 | 1.4856 | 6.2684  | -2.2028 |
| CHB | HIST2 | 149896918 | 1.1913 | 7.2848  | -2.4494 |
| CHB | HIST2 | 149901918 | 1.458  | 7.1154  | -2.3233 |
| CHB | HIST2 | 149906918 | 2.1598 | 7.6237  | -2.107  |
| CHB | HIST2 | 149911918 | 1.6097 | 7.1154  | -2.261  |
| CHB | HIST2 | 149916918 | 1.5205 | 6.2684  | -2.1867 |
| CHB | HIST2 | 149921918 | 2.7129 | 8.3013  | -1.9931 |
| CHB | HIST2 | 149926918 | 4.359  | 11.012  | -1.8249 |
| CHB | HIST2 | 149931918 | 2.9446 | 10.3343 | -2.151  |
| CHB | HIST2 | 149936918 | 2.0959 | 9.6567  | -2.3444 |
| CHB | HIST2 | 149941918 | 2.9341 | 8.3013  | -1.9142 |
| CHB | HIST2 | 149946918 | 2.0714 | 6.4378  | -1.9633 |
| CHB | HIST2 | 149951918 | 2.0166 | 7.9625  | -2.2034 |
| CHB | HIST2 | 149956918 | 1.4021 | 7.7931  | -2.4155 |
| CHB | HIST2 | 149961918 | 0.9977 | 6.0989  | -2.408  |
| CHB | HIST2 | 149966918 | 1.0267 | 6.0989  | -2.3943 |
| CHB | HIST2 | 149971918 | 1.3632 | 5.2519  | -2.0973 |
| CHB | HIST2 | 149976918 | 1.961  | 5.0825  | -1.733  |
| CHB | HIST2 | 149981918 | 1.7935 | 7.4543  | -2.2282 |
| CHB | HIST2 | 149986918 | 2.5492 | 8.979   | -2.133  |
| CHB | HIST2 | 149991918 | 3.6819 | 9.4872  | -1.83   |
| CHB | HIST2 | 149996918 | 6.7369 | 11.012  | -1.1726 |
| CHB | HIST2 | 150001918 | 6.0002 | 10.8426 | -1.3477 |
| CHB | HIST2 | 150006918 | 2.9031 | 9.6567  | -2.0941 |
| CHB | HIST2 | 150011918 | 2.226  | 10.1649 | -2.3468 |
| CHB | HIST2 | 150016918 | 1.5603 | 9.4872  | -2.4987 |
| CHB | HIST2 | 150021918 | 1.6747 | 8.3013  | -2.3634 |

## 2\_TajimasD\_data

|     |       |           |         |         |         |
|-----|-------|-----------|---------|---------|---------|
| CHB | HIST2 | 150026918 | 1.3857  | 8.4708  | -2.4803 |
| CHB | HIST2 | 150031918 | 1.1237  | 6.946   | -2.444  |
| CHB | HIST2 | 150036918 | 1.8096  | 6.4378  | -2.081  |
| CHB | HIST2 | 150041918 | 1.8247  | 6.4378  | -2.0742 |
| CHB | HIST2 | 150046918 | 0.9339  | 6.6072  | -2.4918 |
| CHB | HIST2 | 150051918 | 1.0897  | 7.1154  | -2.4746 |
| CHB | HIST2 | 150056918 | 1.1483  | 5.9295  | -2.3146 |
| CHB | HIST2 | 150061918 | 0.7601  | 5.2519  | -2.4226 |
| CHB | HIST2 | 150066918 | 0.5625  | 4.7436  | -2.4663 |
| CHB | HIST2 | 150071918 | 1.252   | 7.1154  | -2.4079 |
| CHB | HIST2 | 150076918 | 1.3716  | 8.3013  | -2.4715 |
| CHB | HIST2 | 150081918 | 0.5846  | 5.2519  | -2.5172 |
| CHB | HIST2 | 150086918 | 1.265   | 5.7601  | -2.2333 |
| CHB | HIST2 | 150091918 | 1.918   | 6.7766  | -2.0856 |
| CHB | HIST2 | 150096918 | 1.5203  | 6.4378  | -2.2111 |
| CHB | HIST2 | 150101918 | 1.5425  | 7.7931  | -2.3624 |
| CHB | HIST2 | 150106918 | 1.8386  | 7.7931  | -2.2505 |
| CHB | HIST2 | 150111918 | 1.514   | 6.4378  | -2.2139 |
| CHB | HIST2 | 150116918 | 0.9865  | 5.9295  | -2.393  |
| CHB | HIST2 | 150121918 | 1.7411  | 7.6237  | -2.2685 |
| CHB | HIST2 | 150126918 | 2.5791  | 8.1319  | -2.0183 |
| CHB | HIST2 | 150131918 | 2.5859  | 8.1319  | -2.0158 |
| CHB | HIST2 | 150136918 | 2.4311  | 9.4872  | -2.2242 |
| CHB | HIST2 | 150141918 | 2.695   | 9.6567  | -2.1587 |
| CHB | HIST2 | 150146918 | 2.7569  | 8.8096  | -2.0436 |
| CHB | HIST2 | 150151918 | 1.9459  | 8.6402  | -2.3011 |
| CHB | HIST2 | 150156918 | 2.6927  | 12.1979 | -2.3681 |
| CHB | HIST2 | 150161918 | 6.5277  | 12.1979 | -1.4127 |
| CHB | HIST2 | 150166918 | 9.356   | 10.1649 | -0.2391 |
| CHB | HIST2 | 150171918 | 6.9408  | 10.1649 | -0.9531 |
| CHB | HIST2 | 150176918 | 5.5677  | 9.9955  | -1.3296 |
| CHB | HIST2 | 150181918 | 7.1489  | 9.8261  | -0.8168 |
| CHB | HIST2 | 150186918 | 5.0491  | 7.2848  | -0.8987 |
| CHB | HIST2 | 150191918 | 4.5609  | 6.7766  | -0.9511 |
| CHB | HIST2 | 150196918 | 7.1516  | 8.6402  | -0.5117 |
| CHB | HIST2 | 150201918 | 9.2675  | 10.1649 | -0.2653 |
| CHB | HIST2 | 150206918 | 9.6792  | 11.6896 | -0.5214 |
| CHB | HIST2 | 150211918 | 7.4653  | 11.1814 | -1.0048 |
| CHB | HIST2 | 150216918 | 7.3554  | 9.6567  | -0.7136 |
| CHB | HIST2 | 150221918 | 6.8858  | 8.3013  | -0.5048 |
| CHB | HIST2 | 150226918 | 3.0442  | 6.2684  | -1.485  |
| CHB | HIST2 | 150231918 | 2.2854  | 5.2519  | -1.5999 |
| CHB | HIST2 | 150236918 | 3.2071  | 4.5742  | -0.8325 |
| CHB | HIST2 | 150241918 | 3.2781  | 5.2519  | -1.0645 |
| CHB | HIST2 | 150246918 | 5.0704  | 7.2848  | -0.8901 |
| CHB | HIST2 | 150251918 | 4.8388  | 7.6237  | -1.0739 |
| CHB | HIST2 | 150256918 | 5.8228  | 7.9625  | -0.7929 |
| CHB | HIST2 | 150261918 | 10.4672 | 10.1649 | 0.0894  |
| CHB | HIST2 | 150266918 | 14.0217 | 11.6896 | 0.6048  |

## 2\_TajimasD\_data

|     |       |           |         |         |         |
|-----|-------|-----------|---------|---------|---------|
| CHB | HIST2 | 150271918 | 11.6672 | 10.5037 | 0.3336  |
| CHB | HIST2 | 150276918 | 9.1625  | 11.012  | -0.5073 |
| CHB | HIST2 | 150281918 | 10.7638 | 12.8755 | -0.4999 |
| CHB | HIST2 | 150286918 | 8.9783  | 10.1649 | -0.3508 |
| CHB | HIST2 | 150291918 | 6.7186  | 8.6402  | -0.6605 |
| CHB | HIST2 | 150296918 | 6.1092  | 8.8096  | -0.9117 |
| CHB | HIST2 | 150301918 | 5.8606  | 8.6402  | -0.9554 |
| CHB | HIST2 | 150306918 | 7.0588  | 10.3343 | -0.9535 |
| CHB | HIST2 | 150311918 | 7.8418  | 9.3178  | -0.4731 |
| CHB | HIST2 | 150316918 | 9.1314  | 9.8261  | -0.212  |
| CHB | HIST2 | 150321918 | 8.5193  | 10.8426 | -0.6466 |
| CHB | HIST2 | 150326918 | 9.238   | 11.5202 | -0.6    |
| CHB | HIST2 | 150331918 | 9.2711  | 11.8591 | -0.6621 |
| CHB | HIST2 | 150336918 | 6.6153  | 8.8096  | -0.7409 |
| CHB | HIST2 | 150341918 | 6.126   | 6.2684  | -0.0656 |
| CHB | HIST2 | 150346918 | 6.2258  | 6.7766  | -0.2364 |
| CHB | HIST2 | 150351918 | 6.9638  | 10.6731 | -1.0476 |
| CHB | HIST2 | 150356918 | 8.4662  | 13.2144 | -1.0968 |
| CHB | HIST2 | 150361918 | 8.0091  | 11.012  | -0.8237 |
| CHB | HIST2 | 150366918 | 8.5387  | 11.8591 | -0.8495 |
| CHB | HIST2 | 150371918 | 9.8892  | 14.5697 | -0.9855 |
| CHB | HIST2 | 150376918 | 10.6242 | 15.2474 | -0.9322 |
| CHB | HIST2 | 150381918 | 8.9733  | 15.2474 | -1.2651 |
| YRI | HIST2 | 149391918 | 6.955   | 7.0586  | -0.0427 |
| YRI | HIST2 | 149396918 | 5.2869  | 7.2267  | -0.7827 |
| YRI | HIST2 | 149401918 | 7.2956  | 9.2434  | -0.6269 |
| YRI | HIST2 | 149406918 | 6.2313  | 8.9073  | -0.8913 |
| YRI | HIST2 | 149411918 | 4.8382  | 7.3947  | -1.0102 |
| YRI | HIST2 | 149416918 | 5.2805  | 5.378   | -0.0513 |
| YRI | HIST2 | 149421918 | 3.4594  | 3.1932  | 0.2195  |
| YRI | HIST2 | 149426918 | 3.1755  | 4.2016  | -0.6703 |
| YRI | HIST2 | 149431918 | 2.5498  | 3.8654  | -0.9232 |
| YRI | HIST2 | 149436918 | 0.734   | 1.3445  | -0.9916 |
| YRI | HIST2 | 149441918 | 0.0185  | 0.1681  | -0.8893 |
| YRI | HIST2 | 149446918 | 0.1568  | 0.5042  | -1.0918 |
| YRI | HIST2 | 149451918 | 0.4181  | 1.1764  | -1.3563 |
| YRI | HIST2 | 149456918 | 0.5682  | 1.5126  | -1.4063 |
| YRI | HIST2 | 149461918 | 0.3069  | 0.8403  | -1.2048 |
| YRI | HIST2 | 149466918 | 0       | 0       | 0       |
| YRI | HIST2 | 149471918 | 0       | 0       | 0       |
| YRI | HIST2 | 149476918 | 0       | 0       | 0       |
| YRI | HIST2 | 149481918 | 0       | 0       | 0       |
| YRI | HIST2 | 149486918 | 0       | 0       | 0       |
| YRI | HIST2 | 149491918 | 0       | 0       | 0       |
| YRI | HIST2 | 149496918 | 0       | 0       | 0       |
| YRI | HIST2 | 149501918 | 0       | 0       | 0       |
| YRI | HIST2 | 149506918 | 0.4018  | 0.5042  | -0.3218 |
| YRI | HIST2 | 149511918 | 0.6674  | 2.0167  | -1.6133 |
| YRI | HIST2 | 149516918 | 0.4991  | 2.0167  | -1.8145 |



## 2\_TajimasD\_data

|     |       |           |         |         |         |
|-----|-------|-----------|---------|---------|---------|
| YRI | HIST2 | 149521918 | 0.2335  | 0.5042  | -0.8507 |
| YRI | HIST2 | 149526918 | 0.073   | 0.3361  | -1.0562 |
| YRI | HIST2 | 149531918 | 0.2339  | 0.5042  | -0.8495 |
| YRI | HIST2 | 149536918 | 0.1609  | 0.1681  | -0.0428 |
| YRI | HIST2 | 149541918 | 0       | 0       | 0       |
| YRI | HIST2 | 149546918 | 0       | 0       | 0       |
| YRI | HIST2 | 149551918 | 0       | 0       | 0       |
| YRI | HIST2 | 149556918 | 0       | 0       | 0       |
| YRI | HIST2 | 149561918 | 0       | 0       | 0       |
| YRI | HIST2 | 149566918 | 0.0278  | 0.3361  | -1.2377 |
| YRI | HIST2 | 149571918 | 1.1098  | 1.6806  | -0.7853 |
| YRI | HIST2 | 149576918 | 1.082   | 1.3445  | -0.4263 |
| YRI | HIST2 | 149581918 | 2.3949  | 5.0419  | -1.4748 |
| YRI | HIST2 | 149586918 | 2.8328  | 6.0502  | -1.5244 |
| YRI | HIST2 | 149591918 | 0.7683  | 1.8487  | -1.3819 |
| YRI | HIST2 | 149596918 | 2.1637  | 2.8571  | -0.6271 |
| YRI | HIST2 | 149601918 | 6.0443  | 6.3864  | -0.1544 |
| YRI | HIST2 | 149606918 | 5.8024  | 6.8906  | -0.4585 |
| YRI | HIST2 | 149611918 | 2.6148  | 3.8654  | -0.8776 |
| YRI | HIST2 | 149616918 | 1.0235  | 1.3445  | -0.5214 |
| YRI | HIST2 | 149621918 | 0       | 0       | 0       |
| YRI | HIST2 | 149626918 | 0.0093  | 0.1681  | -0.944  |
| YRI | HIST2 | 149631918 | 0.0093  | 0.1681  | -0.944  |
| YRI | HIST2 | 149636918 | 3.1146  | 2.0167  | 1.3127  |
| YRI | HIST2 | 149641918 | 4.1673  | 4.2016  | -0.0224 |
| YRI | HIST2 | 149646918 | 7.0209  | 8.235   | -0.4347 |
| YRI | HIST2 | 149651918 | 10.0483 | 11.2602 | -0.3244 |
| YRI | HIST2 | 149656918 | 7.2859  | 8.235   | -0.3398 |
| YRI | HIST2 | 149661918 | 7.8571  | 8.067   | -0.0766 |
| YRI | HIST2 | 149666918 | 10.778  | 12.6047 | -0.4397 |
| YRI | HIST2 | 149671918 | 9.844   | 13.7811 | -0.871  |
| YRI | HIST2 | 149676918 | 6.2212  | 10.0837 | -1.1464 |
| YRI | HIST2 | 149681918 | 4.8066  | 9.2434  | -1.4279 |
| YRI | HIST2 | 149686918 | 2.964   | 8.7392  | -1.9576 |
| YRI | HIST2 | 149691918 | 3.0136  | 6.5544  | -1.5611 |
| YRI | HIST2 | 149696918 | 4.4269  | 7.2267  | -1.1298 |
| YRI | HIST2 | 149701918 | 6.8933  | 10.2518 | -0.9816 |
| YRI | HIST2 | 149706918 | 10.0404 | 12.9408 | -0.6811 |
| YRI | HIST2 | 149711918 | 8.1616  | 11.2602 | -0.8295 |
| YRI | HIST2 | 149716918 | 7.9476  | 11.4282 | -0.9189 |
| YRI | HIST2 | 149721918 | 9.3344  | 13.2769 | -0.9036 |
| YRI | HIST2 | 149726918 | 8.5864  | 13.445  | -1.1003 |
| YRI | HIST2 | 149731918 | 7.8295  | 12.6047 | -1.1495 |
| YRI | HIST2 | 149736918 | 4.8859  | 8.067   | -1.1608 |
| YRI | HIST2 | 149741918 | 3.1465  | 5.8822  | -1.3293 |
| YRI | HIST2 | 149746918 | 6.8576  | 7.7309  | -0.3314 |
| YRI | HIST2 | 149751918 | 6.698   | 7.8989  | -0.4468 |
| YRI | HIST2 | 149756918 | 6.0847  | 9.5795  | -1.088  |
| YRI | HIST2 | 149761918 | 6.5749  | 10.924  | -1.1978 |

## 2\_TajimasD\_data

|     |       |           |         |         |         |
|-----|-------|-----------|---------|---------|---------|
| YRI | HIST2 | 149766918 | 3.4078  | 8.4031  | -1.7556 |
| YRI | HIST2 | 149771918 | 5.2975  | 10.4199 | -1.4746 |
| YRI | HIST2 | 149776918 | 6.5051  | 12.7727 | -1.49   |
| YRI | HIST2 | 149781918 | 4.8875  | 13.2769 | -1.9227 |
| YRI | HIST2 | 149786918 | 4.2685  | 12.1005 | -1.9594 |
| YRI | HIST2 | 149791918 | 2.3726  | 5.8822  | -1.7054 |
| YRI | HIST2 | 149796918 | 0.5373  | 1.1764  | -1.1431 |
| YRI | HIST2 | 149801918 | 0       | 0       | 0       |
| YRI | HIST2 | 149806918 | 0       | 0       | 0       |
| YRI | HIST2 | 149811918 | 2.3469  | 3.3612  | -0.8013 |
| YRI | HIST2 | 149816918 | 4.7635  | 8.4031  | -1.2792 |
| YRI | HIST2 | 149821918 | 3.1897  | 5.378   | -1.1517 |
| YRI | HIST2 | 149826918 | 0.7731  | 0.3361  | 1.7544  |
| YRI | HIST2 | 149831918 | 0       | 0       | 0       |
| YRI | HIST2 | 149836918 | 0       | 0       | 0       |
| YRI | HIST2 | 149841918 | 0.7039  | 1.8487  | -1.4643 |
| YRI | HIST2 | 149846918 | 3.827   | 8.7392  | -1.6651 |
| YRI | HIST2 | 149851918 | 5.8461  | 14.2853 | -1.8044 |
| YRI | HIST2 | 149856918 | 3.9012  | 11.9324 | -2.0359 |
| YRI | HIST2 | 149861918 | 4.7065  | 11.0921 | -1.7337 |
| YRI | HIST2 | 149866918 | 7.9347  | 12.9408 | -1.1755 |
| YRI | HIST2 | 149871918 | 6.7001  | 11.5963 | -1.275  |
| YRI | HIST2 | 149876918 | 7.1644  | 11.4282 | -1.1257 |
| YRI | HIST2 | 149881918 | 7.8587  | 11.4282 | -0.9424 |
| YRI | HIST2 | 149886918 | 5.8142  | 11.7644 | -1.5286 |
| YRI | HIST2 | 149891918 | 5.0434  | 12.1005 | -1.7655 |
| YRI | HIST2 | 149896918 | 4.5016  | 12.7727 | -1.9663 |
| YRI | HIST2 | 149901918 | 3.9427  | 12.1005 | -2.0409 |
| YRI | HIST2 | 149906918 | 5.8398  | 11.2602 | -1.4511 |
| YRI | HIST2 | 149911918 | 7.021   | 12.1005 | -1.2708 |
| YRI | HIST2 | 149916918 | 5.6254  | 11.9324 | -1.5988 |
| YRI | HIST2 | 149921918 | 7.2442  | 14.1172 | -1.4861 |
| YRI | HIST2 | 149926918 | 8.8809  | 14.6214 | -1.2005 |
| YRI | HIST2 | 149931918 | 9.3388  | 13.2769 | -0.9026 |
| YRI | HIST2 | 149936918 | 9.4264  | 12.4366 | -0.7339 |
| YRI | HIST2 | 149941918 | 6.495   | 9.9157  | -1.0313 |
| YRI | HIST2 | 149946918 | 4.83    | 8.9073  | -1.358  |
| YRI | HIST2 | 149951918 | 7.3377  | 10.5879 | -0.9217 |
| YRI | HIST2 | 149956918 | 7.465   | 11.0921 | -0.9848 |
| YRI | HIST2 | 149961918 | 5.0128  | 9.4115  | -1.3922 |
| YRI | HIST2 | 149966918 | 5.7236  | 9.2434  | -1.1328 |
| YRI | HIST2 | 149971918 | 6.5439  | 9.4115  | -0.9076 |
| YRI | HIST2 | 149976918 | 7.4242  | 9.7476  | -0.7117 |
| YRI | HIST2 | 149981918 | 8.4613  | 11.2602 | -0.7493 |
| YRI | HIST2 | 149986918 | 9.0638  | 11.5963 | -0.6595 |
| YRI | HIST2 | 149991918 | 9.6696  | 13.2769 | -0.8267 |
| YRI | HIST2 | 149996918 | 13.4448 | 15.9659 | -0.4848 |
| YRI | HIST2 | 150001918 | 13.9501 | 14.9575 | -0.2062 |
| YRI | HIST2 | 150006918 | 11.7445 | 14.9575 | -0.6576 |

## 2\_TajimasD\_data

|     |       |           |         |         |         |
|-----|-------|-----------|---------|---------|---------|
| YRI | HIST2 | 150011918 | 15.2079 | 17.3104 | -0.3742 |
| YRI | HIST2 | 150016918 | 16.0318 | 16.134  | -0.0195 |
| YRI | HIST2 | 150021918 | 12.8877 | 14.7895 | -0.3934 |
| YRI | HIST2 | 150026918 | 11.4955 | 14.1172 | -0.5669 |
| YRI | HIST2 | 150031918 | 9.2713  | 11.7644 | -0.6405 |
| YRI | HIST2 | 150036918 | 8.5099  | 12.2685 | -0.9282 |
| YRI | HIST2 | 150041918 | 11.1871 | 14.6214 | -0.7182 |
| YRI | HIST2 | 150046918 | 11.2786 | 14.7895 | -0.7263 |
| YRI | HIST2 | 150051918 | 8.9208  | 13.445  | -1.0246 |
| YRI | HIST2 | 150056918 | 7.5279  | 12.9408 | -1.271  |
| YRI | HIST2 | 150061918 | 8.947   | 12.9408 | -0.9378 |
| YRI | HIST2 | 150066918 | 8.6188  | 11.7644 | -0.8081 |
| YRI | HIST2 | 150071918 | 9.2924  | 13.9492 | -1.0184 |
| YRI | HIST2 | 150076918 | 12.3127 | 17.4785 | -0.911  |
| YRI | HIST2 | 150081918 | 9.9794  | 15.1256 | -1.0421 |
| YRI | HIST2 | 150086918 | 11.7293 | 14.9575 | -0.6607 |
| YRI | HIST2 | 150091918 | 15.6197 | 15.9659 | -0.0666 |
| YRI | HIST2 | 150096918 | 12.5007 | 14.6214 | -0.4435 |
| YRI | HIST2 | 150101918 | 11.1174 | 15.2937 | -0.8368 |
| YRI | HIST2 | 150106918 | 11.8366 | 16.4701 | -0.865  |
| YRI | HIST2 | 150111918 | 10.0344 | 14.6214 | -0.9593 |
| YRI | HIST2 | 150116918 | 7.2743  | 12.9408 | -1.3306 |
| YRI | HIST2 | 150121918 | 8.1495  | 15.4617 | -1.45   |
| YRI | HIST2 | 150126918 | 9.9072  | 14.9575 | -1.0336 |
| YRI | HIST2 | 150131918 | 11.4117 | 16.134  | -0.8991 |
| YRI | HIST2 | 150136918 | 12.9766 | 18.3188 | -0.9006 |
| YRI | HIST2 | 150141918 | 10.8039 | 15.1256 | -0.8751 |
| YRI | HIST2 | 150146918 | 8.1292  | 12.4366 | -1.0501 |
| YRI | HIST2 | 150151918 | 10.5053 | 13.9492 | -0.7532 |
| YRI | HIST2 | 150156918 | 15.9743 | 17.6465 | -0.2922 |
| YRI | HIST2 | 150161918 | 16.5344 | 18.6549 | -0.3513 |
| YRI | HIST2 | 150166918 | 13.6607 | 16.6382 | -0.5505 |
| YRI | HIST2 | 150171918 | 11.708  | 15.7978 | -0.7945 |
| YRI | HIST2 | 150176918 | 12.1766 | 15.9659 | -0.7287 |
| YRI | HIST2 | 150181918 | 12.4342 | 14.4534 | -0.427  |
| YRI | HIST2 | 150186918 | 9.3999  | 11.7644 | -0.6075 |
| YRI | HIST2 | 150191918 | 9.2298  | 11.5963 | -0.6163 |
| YRI | HIST2 | 150196918 | 9.9879  | 10.924  | -0.2578 |
| YRI | HIST2 | 150201918 | 11.2337 | 10.756  | 0.1335  |
| YRI | HIST2 | 150206918 | 13.3994 | 13.9492 | -0.1202 |
| YRI | HIST2 | 150211918 | 12.0565 | 14.2853 | -0.4765 |
| YRI | HIST2 | 150216918 | 11.9225 | 13.1089 | -0.2752 |
| YRI | HIST2 | 150221918 | 10.1069 | 10.924  | -0.225  |
| YRI | HIST2 | 150226918 | 5.0016  | 8.5712  | -1.2319 |
| YRI | HIST2 | 150231918 | 3.8797  | 8.235   | -1.5594 |
| YRI | HIST2 | 150236918 | 3.0906  | 6.3864  | -1.4875 |
| YRI | HIST2 | 150241918 | 4.1562  | 8.4031  | -1.4926 |
| YRI | HIST2 | 150246918 | 6.3439  | 11.2602 | -1.3161 |
| YRI | HIST2 | 150251918 | 6.6472  | 10.756  | -1.1482 |

## 2\_TajimasD\_data

|     |       |           |         |         |         |
|-----|-------|-----------|---------|---------|---------|
| YRI | HIST2 | 150256918 | 8.2844  | 9.9157  | -0.4918 |
| YRI | HIST2 | 150261918 | 14.8358 | 12.7727 | 0.4905  |
| YRI | HIST2 | 150266918 | 20.1074 | 17.1423 | 0.5327  |
| YRI | HIST2 | 150271918 | 16.3573 | 16.4701 | -0.0211 |
| YRI | HIST2 | 150276918 | 14.1861 | 15.6298 | -0.2833 |
| YRI | HIST2 | 150281918 | 13.4973 | 14.9575 | -0.2988 |
| YRI | HIST2 | 150286918 | 9.8463  | 12.6047 | -0.664  |
| YRI | HIST2 | 150291918 | 9.4845  | 11.7644 | -0.5857 |
| YRI | HIST2 | 150296918 | 10.3939 | 11.9324 | -0.39   |
| YRI | HIST2 | 150301918 | 11.0701 | 12.4366 | -0.3332 |
| YRI | HIST2 | 150306918 | 12.6043 | 14.4534 | -0.391  |
| YRI | HIST2 | 150311918 | 12.5842 | 13.445  | -0.1949 |
| YRI | HIST2 | 150316918 | 14.3613 | 13.613  | 0.1675  |
| YRI | HIST2 | 150321918 | 13.066  | 14.7895 | -0.3565 |
| YRI | HIST2 | 150326918 | 12.5787 | 14.4534 | -0.3964 |
| YRI | HIST2 | 150331918 | 12.9667 | 14.2853 | -0.2819 |
| YRI | HIST2 | 150336918 | 11.1487 | 12.9408 | -0.4208 |
| YRI | HIST2 | 150341918 | 10.8111 | 12.1005 | -0.3226 |
| YRI | HIST2 | 150346918 | 9.2952  | 10.756  | -0.4082 |
| YRI | HIST2 | 150351918 | 11.6979 | 11.9324 | -0.0594 |
| YRI | HIST2 | 150356918 | 15.7291 | 15.4617 | 0.053   |
| YRI | HIST2 | 150361918 | 14.1042 | 14.1172 | -0.0028 |
| YRI | HIST2 | 150366918 | 13.2521 | 13.613  | -0.0808 |
| YRI | HIST2 | 150371918 | 15.206  | 17.3104 | -0.3746 |
| YRI | HIST2 | 150376918 | 15.8402 | 17.4785 | -0.2889 |
| YRI | HIST2 | 150381918 | 16.5979 | 15.2937 | 0.2613  |
| CEU | HIST2 | 149392469 | 6.3428  | 6.1402  | 0.0953  |
| CEU | HIST2 | 149397469 | 5.3034  | 5.9697  | -0.3216 |
| CEU | HIST2 | 149402469 | 5.9522  | 5.9697  | -0.0084 |
| CEU | HIST2 | 149407469 | 4.525   | 4.6052  | -0.0487 |
| CEU | HIST2 | 149412469 | 4.3368  | 3.4112  | 0.727   |
| CEU | HIST2 | 149417469 | 4.1068  | 3.2407  | 0.7102  |
| CEU | HIST2 | 149422469 | 1.9963  | 1.7056  | 0.3981  |
| CEU | HIST2 | 149427469 | 2.7172  | 2.729   | -0.0112 |
| CEU | HIST2 | 149432469 | 2.2187  | 2.5584  | -0.3384 |
| CEU | HIST2 | 149437469 | 0.5232  | 0.6822  | -0.4152 |
| CEU | HIST2 | 149442469 | 0       | 0       | 0       |
| CEU | HIST2 | 149447469 | 0.08    | 0.5117  | -1.3539 |
| CEU | HIST2 | 149452469 | 0.1394  | 0.8528  | -1.6066 |
| CEU | HIST2 | 149457469 | 0.128   | 0.6822  | -1.4472 |
| CEU | HIST2 | 149462469 | 0.0686  | 0.3411  | -1.0924 |
| CEU | HIST2 | 149467469 | 0       | 0       | 0       |
| CEU | HIST2 | 149472469 | 0       | 0       | 0       |
| CEU | HIST2 | 149477469 | 0       | 0       | 0       |
| CEU | HIST2 | 149482469 | 0       | 0       | 0       |
| CEU | HIST2 | 149487469 | 0       | 0       | 0       |
| CEU | HIST2 | 149492469 | 0       | 0       | 0       |
| CEU | HIST2 | 149497469 | 0       | 0       | 0       |
| CEU | HIST2 | 149502469 | 0       | 0       | 0       |

## 2\_TajimasD\_data

|     |       |           |         |        |         |
|-----|-------|-----------|---------|--------|---------|
| CEU | HIST2 | 149507469 | 0.1363  | 0.5117 | -1.1774 |
| CEU | HIST2 | 149512469 | 0.4605  | 1.1939 | -1.3069 |
| CEU | HIST2 | 149517469 | 0.3243  | 0.6822 | -0.9346 |
| CEU | HIST2 | 149522469 | 0       | 0      | 0       |
| CEU | HIST2 | 149527469 | 0.0101  | 0.1706 | -0.9534 |
| CEU | HIST2 | 149532469 | 0.0101  | 0.1706 | -0.9534 |
| CEU | HIST2 | 149537469 | 0       | 0      | 0       |
| CEU | HIST2 | 149542469 | 0       | 0      | 0       |
| CEU | HIST2 | 149547469 | 0       | 0      | 0       |
| CEU | HIST2 | 149552469 | 0       | 0      | 0       |
| CEU | HIST2 | 149557469 | 0       | 0      | 0       |
| CEU | HIST2 | 149562469 | 0       | 0      | 0       |
| CEU | HIST2 | 149567469 | 0.5038  | 0.1706 | 1.9793  |
| CEU | HIST2 | 149572469 | 0.885   | 0.6822 | 0.5296  |
| CEU | HIST2 | 149577469 | 0.4405  | 0.8528 | -0.9285 |
| CEU | HIST2 | 149582469 | 2.8182  | 3.2407 | -0.3464 |
| CEU | HIST2 | 149587469 | 3.7407  | 3.4112 | 0.2588  |
| CEU | HIST2 | 149592469 | 2.1358  | 1.8762 | 0.3305  |
| CEU | HIST2 | 149597469 | 2.4286  | 2.8996 | -0.4236 |
| CEU | HIST2 | 149602469 | 5.8942  | 4.6052 | 0.7826  |
| CEU | HIST2 | 149607469 | 7.5261  | 4.6052 | 1.7734  |
| CEU | HIST2 | 149612469 | 3.7706  | 2.2173 | 1.7353  |
| CEU | HIST2 | 149617469 | 0.8642  | 0.6822 | 0.4753  |
| CEU | HIST2 | 149622469 | 0       | 0      | 0       |
| CEU | HIST2 | 149627469 | 0.0301  | 0.1706 | -0.8346 |
| CEU | HIST2 | 149632469 | 0.0301  | 0.1706 | -0.8346 |
| CEU | HIST2 | 149637469 | 2.3997  | 1.7056 | 0.9507  |
| CEU | HIST2 | 149642469 | 3.2488  | 3.4112 | -0.1276 |
| CEU | HIST2 | 149647469 | 7.4811  | 6.6519 | 0.363   |
| CEU | HIST2 | 149652469 | 8.3985  | 6.3108 | 0.9585  |
| CEU | HIST2 | 149657469 | 4.3752  | 3.5818 | 0.598   |
| CEU | HIST2 | 149662469 | 6.0134  | 6.3108 | -0.1365 |
| CEU | HIST2 | 149667469 | 5.1379  | 9.0398 | -1.2901 |
| CEU | HIST2 | 149672469 | 5.47    | 9.3809 | -1.2494 |
| CEU | HIST2 | 149677469 | 5.5393  | 7.1636 | -0.6649 |
| CEU | HIST2 | 149682469 | 2.4492  | 4.4346 | -1.2457 |
| CEU | HIST2 | 149687469 | 0.9386  | 3.4112 | -1.942  |
| CEU | HIST2 | 149692469 | 1.3915  | 3.5818 | -1.6508 |
| CEU | HIST2 | 149697469 | 2.9058  | 5.2874 | -1.2806 |
| CEU | HIST2 | 149702469 | 5.0212  | 6.8225 | -0.7708 |
| CEU | HIST2 | 149707469 | 8.17    | 7.1636 | 0.412   |
| CEU | HIST2 | 149712469 | 8.8453  | 7.3342 | 0.6055  |
| CEU | HIST2 | 149717469 | 10.1115 | 8.187  | 0.6972  |
| CEU | HIST2 | 149722469 | 9.4482  | 6.9931 | 1.0273  |
| CEU | HIST2 | 149727469 | 6.7996  | 6.6519 | 0.0647  |
| CEU | HIST2 | 149732469 | 5.9992  | 5.9697 | 0.0142  |
| CEU | HIST2 | 149737469 | 3.3105  | 3.4112 | -0.0791 |
| CEU | HIST2 | 149742469 | 2.4663  | 3.4112 | -0.7421 |
| CEU | HIST2 | 149747469 | 4.6718  | 4.0935 | 0.3889  |

## 2\_TajimasD\_data

|     |       |           |        |        |         |
|-----|-------|-----------|--------|--------|---------|
| CEU | HIST2 | 149752469 | 3.3781 | 3.0701 | 0.2642  |
| CEU | HIST2 | 149757469 | 1.8176 | 3.0701 | -1.0744 |
| CEU | HIST2 | 149762469 | 2.309  | 5.1169 | -1.5542 |
| CEU | HIST2 | 149767469 | 2.1754 | 5.2874 | -1.6733 |
| CEU | HIST2 | 149772469 | 3.2146 | 5.9697 | -1.3296 |
| CEU | HIST2 | 149777469 | 4.6902 | 6.8225 | -0.9124 |
| CEU | HIST2 | 149782469 | 5.437  | 7.6753 | -0.8603 |
| CEU | HIST2 | 149787469 | 3.9297 | 7.1636 | -1.3238 |
| CEU | HIST2 | 149792469 | 1.4871 | 3.0701 | -1.3579 |
| CEU | HIST2 | 149797469 | 0.1235 | 0.1706 | -0.2798 |
| CEU | HIST2 | 149802469 | 0      | 0      | 0       |
| CEU | HIST2 | 149807469 | 0      | 0      | 0       |
| CEU | HIST2 | 149812469 | 1.3752 | 1.8762 | -0.6379 |
| CEU | HIST2 | 149817469 | 2.7071 | 4.2641 | -1.0107 |
| CEU | HIST2 | 149822469 | 1.8312 | 2.5584 | -0.7244 |
| CEU | HIST2 | 149827469 | 0.4993 | 0.1706 | 1.9525  |
| CEU | HIST2 | 149832469 | 0      | 0      | 0       |
| CEU | HIST2 | 149837469 | 0      | 0      | 0       |
| CEU | HIST2 | 149842469 | 1.0373 | 1.5351 | -0.7381 |
| CEU | HIST2 | 149847469 | 2.0711 | 4.0935 | -1.3599 |
| CEU | HIST2 | 149852469 | 2.2226 | 5.1169 | -1.602  |
| CEU | HIST2 | 149857469 | 2.9598 | 6.4814 | -1.5784 |
| CEU | HIST2 | 149862469 | 4.1343 | 8.0164 | -1.4339 |
| CEU | HIST2 | 149867469 | 4.7781 | 8.187  | -1.235  |
| CEU | HIST2 | 149872469 | 4.5242 | 6.9931 | -1.033  |
| CEU | HIST2 | 149877469 | 4.0866 | 6.6519 | -1.1231 |
| CEU | HIST2 | 149882469 | 2.6912 | 5.1169 | -1.3427 |
| CEU | HIST2 | 149887469 | 2.3135 | 3.7524 | -1.0425 |
| CEU | HIST2 | 149892469 | 3.5283 | 4.7757 | -0.7336 |
| CEU | HIST2 | 149897469 | 3.3715 | 5.458  | -1.0908 |
| CEU | HIST2 | 149902469 | 3.9571 | 6.3108 | -1.0806 |
| CEU | HIST2 | 149907469 | 3.9744 | 5.6286 | -0.8414 |
| CEU | HIST2 | 149912469 | 1.6186 | 3.9229 | -1.6072 |
| CEU | HIST2 | 149917469 | 1.7209 | 4.0935 | -1.5954 |
| CEU | HIST2 | 149922469 | 3.7137 | 5.1169 | -0.7767 |
| CEU | HIST2 | 149927469 | 4.1585 | 5.458  | -0.6793 |
| CEU | HIST2 | 149932469 | 2.6271 | 5.6286 | -1.5267 |
| CEU | HIST2 | 149937469 | 2.054  | 4.7757 | -1.6007 |
| CEU | HIST2 | 149942469 | 2.6215 | 3.7524 | -0.8193 |
| CEU | HIST2 | 149947469 | 2.2977 | 4.4346 | -1.3408 |
| CEU | HIST2 | 149952469 | 2.9812 | 5.9697 | -1.4423 |
| CEU | HIST2 | 149957469 | 2.1282 | 4.2641 | -1.3865 |
| CEU | HIST2 | 149962469 | 1.1688 | 2.5584 | -1.3843 |
| CEU | HIST2 | 149967469 | 2.2455 | 3.4112 | -0.9156 |
| CEU | HIST2 | 149972469 | 2.0056 | 3.5818 | -1.188  |
| CEU | HIST2 | 149977469 | 1.7365 | 3.9229 | -1.5249 |
| CEU | HIST2 | 149982469 | 3.1398 | 5.1169 | -1.0944 |
| CEU | HIST2 | 149987469 | 4.2152 | 6.3108 | -0.9621 |
| CEU | HIST2 | 149992469 | 5.7143 | 7.5047 | -0.7025 |

## 2\_TajimasD\_data

|     |       |           |         |         |         |
|-----|-------|-----------|---------|---------|---------|
| CEU | HIST2 | 149997469 | 9.5828  | 8.6987  | 0.3029  |
| CEU | HIST2 | 150002469 | 8.3725  | 6.9931  | 0.5772  |
| CEU | HIST2 | 150007469 | 7.1431  | 6.8225  | 0.1372  |
| CEU | HIST2 | 150012469 | 11.1517 | 9.3809  | 0.5657  |
| CEU | HIST2 | 150017469 | 10.7794 | 8.8692  | 0.6428  |
| CEU | HIST2 | 150022469 | 8.5492  | 7.5047  | 0.4098  |
| CEU | HIST2 | 150027469 | 6.0136  | 6.1402  | -0.0596 |
| CEU | HIST2 | 150032469 | 1.9462  | 4.2641  | -1.5046 |
| CEU | HIST2 | 150037469 | 2.7005  | 5.7991  | -1.5347 |
| CEU | HIST2 | 150042469 | 4.5046  | 6.4814  | -0.886  |
| CEU | HIST2 | 150047469 | 4.4902  | 5.458   | -0.5059 |
| CEU | HIST2 | 150052469 | 3.1923  | 4.9463  | -1.0003 |
| CEU | HIST2 | 150057469 | 2.1128  | 4.4346  | -1.4568 |
| CEU | HIST2 | 150062469 | 3.0056  | 4.7757  | -1.0411 |
| CEU | HIST2 | 150067469 | 1.987   | 3.2407  | -1.028  |
| CEU | HIST2 | 150072469 | 5.8835  | 5.6286  | 0.1297  |
| CEU | HIST2 | 150077469 | 7.7425  | 7.8459  | -0.039  |
| CEU | HIST2 | 150082469 | 3.1187  | 5.458   | -1.2229 |
| CEU | HIST2 | 150087469 | 3.1076  | 6.8225  | -1.5896 |
| CEU | HIST2 | 150092469 | 3.7225  | 6.6519  | -1.2825 |
| CEU | HIST2 | 150097469 | 3.9647  | 4.9463  | -0.5598 |
| CEU | HIST2 | 150102469 | 5.1591  | 6.8225  | -0.7118 |
| CEU | HIST2 | 150107469 | 6.2472  | 6.8225  | -0.2462 |
| CEU | HIST2 | 150112469 | 5.381   | 5.458   | -0.0403 |
| CEU | HIST2 | 150117469 | 3.2754  | 4.7757  | -0.8824 |
| CEU | HIST2 | 150122469 | 3.677   | 6.3108  | -1.2092 |
| CEU | HIST2 | 150127469 | 5.6716  | 8.3576  | -0.9548 |
| CEU | HIST2 | 150132469 | 6.0334  | 8.8692  | -0.9543 |
| CEU | HIST2 | 150137469 | 6.3882  | 11.7688 | -1.3905 |
| CEU | HIST2 | 150142469 | 6.4966  | 9.5515  | -0.9597 |
| CEU | HIST2 | 150147469 | 5.0326  | 5.9697  | -0.4523 |
| CEU | HIST2 | 150152469 | 3.2301  | 7.3342  | -1.6444 |
| CEU | HIST2 | 150157469 | 5.2107  | 9.3809  | -1.3322 |
| CEU | HIST2 | 150162469 | 9.0014  | 9.5515  | -0.1728 |
| CEU | HIST2 | 150167469 | 9.7796  | 7.6753  | 0.8088  |
| CEU | HIST2 | 150172469 | 8.6036  | 6.9931  | 0.6739  |
| CEU | HIST2 | 150177469 | 6.8242  | 5.7991  | 0.5077  |
| CEU | HIST2 | 150182469 | 7.6821  | 6.1402  | 0.7256  |
| CEU | HIST2 | 150187469 | 6.2595  | 6.6519  | -0.1718 |
| CEU | HIST2 | 150192469 | 5.329   | 5.9697  | -0.3092 |
| CEU | HIST2 | 150197469 | 8.0014  | 6.4814  | 0.6813  |
| CEU | HIST2 | 150202469 | 9.2993  | 7.3342  | 0.7874  |
| CEU | HIST2 | 150207469 | 9.4055  | 8.0164  | 0.5131  |
| CEU | HIST2 | 150212469 | 8.7469  | 6.9931  | 0.7338  |
| CEU | HIST2 | 150217469 | 8.7153  | 6.4814  | 1.0013  |
| CEU | HIST2 | 150222469 | 7.2513  | 6.1402  | 0.5229  |
| CEU | HIST2 | 150227469 | 3.3078  | 4.4346  | -0.707  |
| CEU | HIST2 | 150232469 | 2.2224  | 3.5818  | -1.0246 |
| CEU | HIST2 | 150237469 | 3.3931  | 3.0701  | 0.2771  |

## 2\_TajimasD\_data

|     |       |           |         |         |         |
|-----|-------|-----------|---------|---------|---------|
| CEU | HIST2 | 150242469 | 3.5269  | 4.4346  | -0.5695 |
| CEU | HIST2 | 150247469 | 5.1911  | 5.458   | -0.1395 |
| CEU | HIST2 | 150252469 | 5.5411  | 5.1169  | 0.2348  |
| CEU | HIST2 | 150257469 | 9.2389  | 7.6753  | 0.601   |
| CEU | HIST2 | 150262469 | 14.1268 | 8.6987  | 1.8596  |
| CEU | HIST2 | 150267469 | 17.9592 | 10.2337 | 2.276   |
| CEU | HIST2 | 150272469 | 17.1991 | 11.7688 | 1.4034  |
| CEU | HIST2 | 150277469 | 13.45   | 10.7454 | 0.7613  |
| CEU | HIST2 | 150282469 | 14.67   | 10.5749 | 1.17    |
| CEU | HIST2 | 150287469 | 13.3049 | 8.5281  | 1.6667  |
| CEU | HIST2 | 150292469 | 10.7938 | 7.5047  | 1.2905  |
| CEU | HIST2 | 150297469 | 8.1129  | 7.3342  | 0.312   |
| CEU | HIST2 | 150302469 | 7.8625  | 7.5047  | 0.1404  |
| CEU | HIST2 | 150307469 | 10.5438 | 9.3809  | 0.3715  |
| CEU | HIST2 | 150312469 | 10.6992 | 9.5515  | 0.3606  |
| CEU | HIST2 | 150317469 | 12.5809 | 10.2337 | 0.6915  |
| CEU | HIST2 | 150322469 | 13.8482 | 9.7221  | 1.2751  |
| CEU | HIST2 | 150327469 | 13.5618 | 9.5515  | 1.2599  |
| CEU | HIST2 | 150332469 | 12.0168 | 9.3809  | 0.8421  |
| CEU | HIST2 | 150337469 | 9.3466  | 8.5281  | 0.2856  |
| CEU | HIST2 | 150342469 | 10.0664 | 8.8692  | 0.4029  |
| CEU | HIST2 | 150347469 | 9.7679  | 8.0164  | 0.6469  |
| CEU | HIST2 | 150352469 | 12.6992 | 10.0632 | 0.7889  |
| CEU | HIST2 | 150357469 | 14.7213 | 10.7454 | 1.1191  |
| CEU | HIST2 | 150362469 | 12.0299 | 9.7221  | 0.7132  |
| CEU | HIST2 | 150367469 | 12.4471 | 10.7454 | 0.479   |
| CEU | HIST2 | 150372469 | 13.6547 | 10.916  | 0.7596  |
| CEU | HIST2 | 150377469 | 14.0484 | 11.2571 | 0.7521  |
| CEU | HIST2 | 150382469 | 13.6518 | 10.7454 | 0.8181  |
| CHB | HIST2 | 149392469 | 4.9347  | 5.7601  | -0.4101 |
| CHB | HIST2 | 149397469 | 4.4259  | 5.4213  | -0.522  |
| CHB | HIST2 | 149402469 | 4.8871  | 6.6072  | -0.7555 |
| CHB | HIST2 | 149407469 | 3.0881  | 4.7436  | -0.9765 |
| CHB | HIST2 | 149412469 | 3.8921  | 4.5742  | -0.4153 |
| CHB | HIST2 | 149417469 | 4.261   | 4.4048  | -0.0905 |
| CHB | HIST2 | 149422469 | 1.5298  | 2.8801  | -1.2174 |
| CHB | HIST2 | 149427469 | 1.9996  | 3.8965  | -1.3267 |
| CHB | HIST2 | 149432469 | 1.8957  | 3.2189  | -1.0879 |
| CHB | HIST2 | 149437469 | 0.399   | 0.8471  | -1.0105 |
| CHB | HIST2 | 149442469 | 0       | 0       | 0       |
| CHB | HIST2 | 149447469 | 0.0386  | 0.5082  | -1.4741 |
| CHB | HIST2 | 149452469 | 0.1065  | 1.3553  | -2.0239 |
| CHB | HIST2 | 149457469 | 0.0873  | 1.1859  | -1.961  |
| CHB | HIST2 | 149462469 | 0.0194  | 0.3388  | -1.2812 |
| CHB | HIST2 | 149467469 | 0       | 0       | 0       |
| CHB | HIST2 | 149472469 | 0       | 0       | 0       |
| CHB | HIST2 | 149477469 | 0       | 0       | 0       |
| CHB | HIST2 | 149482469 | 0       | 0       | 0       |
| CHB | HIST2 | 149487469 | 0       | 0       | 0       |



## 2\_TajimasD\_data

|     |       |           |        |        |         |
|-----|-------|-----------|--------|--------|---------|
| CHB | HIST2 | 149492469 | 0      | 0      | 0       |
| CHB | HIST2 | 149497469 | 0      | 0      | 0       |
| CHB | HIST2 | 149502469 | 0      | 0      | 0       |
| CHB | HIST2 | 149507469 | 0.6372 | 0.6777 | -0.1059 |
| CHB | HIST2 | 149512469 | 0.8968 | 1.0165 | -0.2382 |
| CHB | HIST2 | 149517469 | 0.2694 | 0.5082 | -0.7496 |
| CHB | HIST2 | 149522469 | 0.0097 | 0.1694 | -0.949  |
| CHB | HIST2 | 149527469 | 0.2578 | 0.1694 | 0.5253  |
| CHB | HIST2 | 149532469 | 0.2578 | 0.1694 | 0.5253  |
| CHB | HIST2 | 149537469 | 0      | 0      | 0       |
| CHB | HIST2 | 149542469 | 0      | 0      | 0       |
| CHB | HIST2 | 149547469 | 0      | 0      | 0       |
| CHB | HIST2 | 149552469 | 0      | 0      | 0       |
| CHB | HIST2 | 149557469 | 0      | 0      | 0       |
| CHB | HIST2 | 149562469 | 0      | 0      | 0       |
| CHB | HIST2 | 149567469 | 0.4601 | 0.3388 | 0.4866  |
| CHB | HIST2 | 149572469 | 0.9039 | 0.8471 | 0.1281  |
| CHB | HIST2 | 149577469 | 1.095  | 1.0165 | 0.1562  |
| CHB | HIST2 | 149582469 | 3.3082 | 3.3883 | -0.0631 |
| CHB | HIST2 | 149587469 | 3.4287 | 3.5577 | -0.0975 |
| CHB | HIST2 | 149592469 | 2.0525 | 1.6942 | 0.4917  |
| CHB | HIST2 | 149597469 | 2.9082 | 2.2024 | 0.7903  |
| CHB | HIST2 | 149602469 | 6.534  | 4.2354 | 1.4964  |
| CHB | HIST2 | 149607469 | 7.0862 | 5.4213 | 0.873   |
| CHB | HIST2 | 149612469 | 2.7537 | 2.8801 | -0.114  |
| CHB | HIST2 | 149617469 | 0.574  | 0.5082 | 0.2066  |
| CHB | HIST2 | 149622469 | 0      | 0      | 0       |
| CHB | HIST2 | 149627469 | 0.0097 | 0.1694 | -0.949  |
| CHB | HIST2 | 149632469 | 0.0097 | 0.1694 | -0.949  |
| CHB | HIST2 | 149637469 | 2.8808 | 1.5247 | 2.0147  |
| CHB | HIST2 | 149642469 | 4.3038 | 3.8965 | 0.2849  |
| CHB | HIST2 | 149647469 | 7.5328 | 6.7766 | 0.3246  |
| CHB | HIST2 | 149652469 | 7.0925 | 5.7601 | 0.662   |
| CHB | HIST2 | 149657469 | 3.0921 | 4.5742 | -0.9025 |
| CHB | HIST2 | 149662469 | 5.9966 | 5.4213 | 0.3017  |
| CHB | HIST2 | 149667469 | 7.7933 | 6.6072 | 0.5209  |
| CHB | HIST2 | 149672469 | 8.1593 | 8.6402 | -0.1653 |
| CHB | HIST2 | 149677469 | 6.0101 | 6.0989 | -0.0419 |
| CHB | HIST2 | 149682469 | 2.9364 | 4.5742 | -0.9973 |
| CHB | HIST2 | 149687469 | 2.2947 | 4.5742 | -1.388  |
| CHB | HIST2 | 149692469 | 3.198  | 4.2354 | -0.6753 |
| CHB | HIST2 | 149697469 | 4.2125 | 4.5742 | -0.2202 |
| CHB | HIST2 | 149702469 | 5.94   | 6.7766 | -0.3591 |
| CHB | HIST2 | 149707469 | 8.0221 | 7.9625 | 0.0221  |
| CHB | HIST2 | 149712469 | 6.7569 | 6.0989 | 0.3106  |
| CHB | HIST2 | 149717469 | 7.4384 | 8.1319 | -0.2521 |
| CHB | HIST2 | 149722469 | 7.8527 | 9.1484 | -0.4224 |
| CHB | HIST2 | 149727469 | 6.5829 | 8.4708 | -0.6609 |
| CHB | HIST2 | 149732469 | 5.754  | 7.2848 | -0.6153 |

## 2\_TajimasD\_data

|     |       |           |        |         |         |
|-----|-------|-----------|--------|---------|---------|
| CHB | HIST2 | 149737469 | 2.7978 | 4.4048  | -1.0112 |
| CHB | HIST2 | 149742469 | 1.5346 | 2.8801  | -1.2131 |
| CHB | HIST2 | 149747469 | 3.8666 | 2.8801  | 0.8894  |
| CHB | HIST2 | 149752469 | 3.2829 | 3.0495  | 0.2007  |
| CHB | HIST2 | 149757469 | 1.1759 | 5.4213  | -2.2262 |
| CHB | HIST2 | 149762469 | 1.9924 | 6.6072  | -2.0269 |
| CHB | HIST2 | 149767469 | 2.1696 | 4.5742  | -1.4642 |
| CHB | HIST2 | 149772469 | 1.3105 | 5.7601  | -2.2107 |
| CHB | HIST2 | 149777469 | 0.7729 | 5.0825  | -2.3926 |
| CHB | HIST2 | 149782469 | 1.0246 | 4.4048  | -2.127  |
| CHB | HIST2 | 149787469 | 0.744  | 5.7601  | -2.4921 |
| CHB | HIST2 | 149792469 | 0.4123 | 3.5577  | -2.3771 |
| CHB | HIST2 | 149797469 | 0.1611 | 0.6777  | -1.3505 |
| CHB | HIST2 | 149802469 | 0      | 0       | 0       |
| CHB | HIST2 | 149807469 | 0      | 0       | 0       |
| CHB | HIST2 | 149812469 | 0.4782 | 2.033   | -1.8541 |
| CHB | HIST2 | 149817469 | 1.276  | 5.4213  | -2.1737 |
| CHB | HIST2 | 149822469 | 1.1639 | 3.5577  | -1.8091 |
| CHB | HIST2 | 149827469 | 0.3661 | 0.1694  | 1.1688  |
| CHB | HIST2 | 149832469 | 0      | 0       | 0       |
| CHB | HIST2 | 149837469 | 0      | 0       | 0       |
| CHB | HIST2 | 149842469 | 0.249  | 1.3553  | -1.793  |
| CHB | HIST2 | 149847469 | 0.6308 | 4.7436  | -2.426  |
| CHB | HIST2 | 149852469 | 0.9367 | 7.6237  | -2.5787 |
| CHB | HIST2 | 149857469 | 1.5464 | 6.2684  | -2.1748 |
| CHB | HIST2 | 149862469 | 1.4339 | 6.2684  | -2.2266 |
| CHB | HIST2 | 149867469 | 0.9913 | 7.1154  | -2.515  |
| CHB | HIST2 | 149872469 | 1.1011 | 5.9295  | -2.3375 |
| CHB | HIST2 | 149877469 | 1.6012 | 6.6072  | -2.1987 |
| CHB | HIST2 | 149882469 | 1.7603 | 7.1154  | -2.1992 |
| CHB | HIST2 | 149887469 | 1.2859 | 5.9295  | -2.248  |
| CHB | HIST2 | 149892469 | 1.5239 | 6.7766  | -2.2548 |
| CHB | HIST2 | 149897469 | 1.1529 | 7.1154  | -2.4486 |
| CHB | HIST2 | 149902469 | 1.4393 | 7.1154  | -2.331  |
| CHB | HIST2 | 149907469 | 2.6127 | 8.1319  | -2.0061 |
| CHB | HIST2 | 149912469 | 1.5418 | 6.2684  | -2.1769 |
| CHB | HIST2 | 149917469 | 1.4919 | 6.7766  | -2.2685 |
| CHB | HIST2 | 149922469 | 3.5157 | 8.979   | -1.8123 |
| CHB | HIST2 | 149927469 | 3.9733 | 10.3343 | -1.8516 |
| CHB | HIST2 | 149932469 | 2.1709 | 10.1649 | -2.3631 |
| CHB | HIST2 | 149937469 | 2.0573 | 9.3178  | -2.3273 |
| CHB | HIST2 | 149942469 | 2.9625 | 8.1319  | -1.8789 |
| CHB | HIST2 | 149947469 | 2.0617 | 6.2684  | -1.9375 |
| CHB | HIST2 | 149952469 | 1.9688 | 7.7931  | -2.2013 |
| CHB | HIST2 | 149957469 | 1.3923 | 7.6237  | -2.403  |
| CHB | HIST2 | 149962469 | 1.0171 | 6.4378  | -2.4373 |
| CHB | HIST2 | 149967469 | 1.4121 | 6.6072  | -2.2817 |
| CHB | HIST2 | 149972469 | 1.3341 | 4.7436  | -2.0112 |
| CHB | HIST2 | 149977469 | 1.5755 | 4.5742  | -1.826  |

## 2\_TajimasD\_data

|     |       |           |        |         |         |
|-----|-------|-----------|--------|---------|---------|
| CHB | HIST2 | 149982469 | 2.233  | 7.7931  | -2.1014 |
| CHB | HIST2 | 149987469 | 2.6075 | 9.9955  | -2.2185 |
| CHB | HIST2 | 149992469 | 3.921  | 9.8261  | -1.8017 |
| CHB | HIST2 | 149997469 | 6.7561 | 10.8426 | -1.1373 |
| CHB | HIST2 | 150002469 | 5.3497 | 10.1649 | -1.4234 |
| CHB | HIST2 | 150007469 | 2.8742 | 9.4872  | -2.0846 |
| CHB | HIST2 | 150012469 | 2.2077 | 10.3343 | -2.3655 |
| CHB | HIST2 | 150017469 | 1.5117 | 8.8096  | -2.464  |
| CHB | HIST2 | 150022469 | 1.6941 | 8.8096  | -2.4024 |
| CHB | HIST2 | 150027469 | 1.3954 | 8.6402  | -2.4903 |
| CHB | HIST2 | 150032469 | 1.0944 | 6.2684  | -2.383  |
| CHB | HIST2 | 150037469 | 1.8192 | 6.4378  | -2.0767 |
| CHB | HIST2 | 150042469 | 1.9669 | 7.1154  | -2.1143 |
| CHB | HIST2 | 150047469 | 0.9244 | 6.6072  | -2.4959 |
| CHB | HIST2 | 150052469 | 1.0657 | 6.6072  | -2.4339 |
| CHB | HIST2 | 150057469 | 1.1483 | 5.9295  | -2.3146 |
| CHB | HIST2 | 150062469 | 0.613  | 4.913   | -2.4596 |
| CHB | HIST2 | 150067469 | 0.5917 | 5.2519  | -2.5134 |
| CHB | HIST2 | 150072469 | 1.3286 | 7.6237  | -2.4276 |
| CHB | HIST2 | 150077469 | 1.3328 | 7.6237  | -2.4259 |
| CHB | HIST2 | 150082469 | 0.8626 | 5.0825  | -2.3428 |
| CHB | HIST2 | 150087469 | 1.351  | 6.2684  | -2.2648 |
| CHB | HIST2 | 150092469 | 1.5829 | 6.7766  | -2.2295 |
| CHB | HIST2 | 150097469 | 1.4826 | 6.2684  | -2.2042 |
| CHB | HIST2 | 150102469 | 1.5997 | 7.9625  | -2.3579 |
| CHB | HIST2 | 150107469 | 1.8096 | 7.7931  | -2.2614 |
| CHB | HIST2 | 150112469 | 1.4567 | 6.0989  | -2.1913 |
| CHB | HIST2 | 150117469 | 1.3547 | 6.0989  | -2.2395 |
| CHB | HIST2 | 150122469 | 2.2334 | 7.7931  | -2.1013 |
| CHB | HIST2 | 150127469 | 2.6113 | 8.1319  | -2.0066 |
| CHB | HIST2 | 150132469 | 2.1033 | 8.1319  | -2.1912 |
| CHB | HIST2 | 150137469 | 2.0793 | 9.8261  | -2.3636 |
| CHB | HIST2 | 150142469 | 2.7139 | 9.4872  | -2.1351 |
| CHB | HIST2 | 150147469 | 2.7179 | 8.1319  | -1.9678 |
| CHB | HIST2 | 150152469 | 1.9273 | 8.979   | -2.3393 |
| CHB | HIST2 | 150157469 | 2.7318 | 12.8755 | -2.4014 |
| CHB | HIST2 | 150162469 | 6.5275 | 12.0285 | -1.3887 |
| CHB | HIST2 | 150167469 | 9.7902 | 9.6567  | 0.0414  |
| CHB | HIST2 | 150172469 | 7.4908 | 10.5037 | -0.8638 |
| CHB | HIST2 | 150177469 | 5.6417 | 10.3343 | -1.3659 |
| CHB | HIST2 | 150182469 | 7.0632 | 9.3178  | -0.7227 |
| CHB | HIST2 | 150187469 | 4.4826 | 6.7766  | -0.9847 |
| CHB | HIST2 | 150192469 | 4.0871 | 6.946   | -1.2001 |
| CHB | HIST2 | 150197469 | 8.1695 | 8.979   | -0.2685 |
| CHB | HIST2 | 150202469 | 9.2578 | 9.9955  | -0.2215 |
| CHB | HIST2 | 150207469 | 8.6613 | 11.3508 | -0.717  |
| CHB | HIST2 | 150212469 | 7.9743 | 11.5202 | -0.9323 |
| CHB | HIST2 | 150217469 | 7.8589 | 9.9955  | -0.6416 |
| CHB | HIST2 | 150222469 | 6.5469 | 8.8096  | -0.7639 |

## 2\_TajimasD\_data

|     |       |           |         |         |         |
|-----|-------|-----------|---------|---------|---------|
| CHB | HIST2 | 150227469 | 2.969   | 6.2684  | -1.5196 |
| CHB | HIST2 | 150232469 | 2.1055  | 4.2354  | -1.3866 |
| CHB | HIST2 | 150237469 | 3.3891  | 4.5742  | -0.7216 |
| CHB | HIST2 | 150242469 | 3.8846  | 5.9295  | -0.99   |
| CHB | HIST2 | 150247469 | 5.0166  | 7.4543  | -0.9595 |
| CHB | HIST2 | 150252469 | 4.6815  | 7.6237  | -1.1346 |
| CHB | HIST2 | 150257469 | 7.4337  | 8.4708  | -0.3631 |
| CHB | HIST2 | 150262469 | 10.3901 | 10.1649 | 0.0666  |
| CHB | HIST2 | 150267469 | 12.8372 | 11.5202 | 0.3463  |
| CHB | HIST2 | 150272469 | 11.6891 | 10.6731 | 0.287   |
| CHB | HIST2 | 150277469 | 8.1893  | 10.3343 | -0.6244 |
| CHB | HIST2 | 150282469 | 10.3892 | 12.3673 | -0.4865 |
| CHB | HIST2 | 150287469 | 10.2355 | 10.8426 | -0.169  |
| CHB | HIST2 | 150292469 | 7.4604  | 8.8096  | -0.4555 |
| CHB | HIST2 | 150297469 | 4.852   | 8.1319  | -1.1922 |
| CHB | HIST2 | 150302469 | 5.5199  | 8.3013  | -0.992  |
| CHB | HIST2 | 150307469 | 7.7236  | 10.5037 | -0.797  |
| CHB | HIST2 | 150312469 | 7.8652  | 9.4872  | -0.5113 |
| CHB | HIST2 | 150317469 | 8.8378  | 9.8261  | -0.3015 |
| CHB | HIST2 | 150322469 | 8.8622  | 11.3508 | -0.6635 |
| CHB | HIST2 | 150327469 | 9.3931  | 12.0285 | -0.6653 |
| CHB | HIST2 | 150332469 | 8.5134  | 11.5202 | -0.7905 |
| CHB | HIST2 | 150337469 | 6.0792  | 7.9625  | -0.6979 |
| CHB | HIST2 | 150342469 | 6.8915  | 6.2684  | 0.287   |
| CHB | HIST2 | 150347469 | 6.6887  | 7.4543  | -0.3014 |
| CHB | HIST2 | 150352469 | 7.558   | 11.5202 | -1.0417 |
| CHB | HIST2 | 150357469 | 8.9225  | 12.8755 | -0.9358 |
| CHB | HIST2 | 150362469 | 6.9539  | 9.8261  | -0.8763 |
| CHB | HIST2 | 150367469 | 8.3628  | 12.3673 | -0.9848 |
| CHB | HIST2 | 150372469 | 10.004  | 15.4168 | -1.08   |
| CHB | HIST2 | 150377469 | 10.2816 | 15.0779 | -0.9774 |
| CHB | HIST2 | 150382469 | 9.4824  | 15.2474 | -1.1624 |
| YRI | HIST2 | 149392469 | 6.7938  | 7.2267  | -0.1747 |
| YRI | HIST2 | 149397469 | 5.7309  | 7.5628  | -0.7092 |
| YRI | HIST2 | 149402469 | 7.2413  | 8.9073  | -0.5549 |
| YRI | HIST2 | 149407469 | 5.7873  | 8.5712  | -0.9607 |
| YRI | HIST2 | 149412469 | 5.3418  | 7.5628  | -0.8598 |
| YRI | HIST2 | 149417469 | 5.4485  | 5.5461  | -0.05   |
| YRI | HIST2 | 149422469 | 2.9383  | 3.3612  | -0.3341 |
| YRI | HIST2 | 149427469 | 3.1886  | 4.3696  | -0.7457 |
| YRI | HIST2 | 149432469 | 2.5221  | 3.3612  | -0.6629 |
| YRI | HIST2 | 149437469 | 0.5529  | 1.0084  | -0.9081 |
| YRI | HIST2 | 149442469 | 0.0185  | 0.1681  | -0.8893 |
| YRI | HIST2 | 149447469 | 0.1568  | 0.5042  | -1.0918 |
| YRI | HIST2 | 149452469 | 0.4181  | 1.1764  | -1.3563 |
| YRI | HIST2 | 149457469 | 0.5682  | 1.5126  | -1.4063 |
| YRI | HIST2 | 149462469 | 0.3069  | 0.8403  | -1.2048 |
| YRI | HIST2 | 149467469 | 0       | 0       | 0       |
| YRI | HIST2 | 149472469 | 0       | 0       | 0       |

## 2\_TajimasD\_data

|     |       |           |         |         |         |
|-----|-------|-----------|---------|---------|---------|
| YRI | HIST2 | 149477469 | 0       | 0       | 0       |
| YRI | HIST2 | 149482469 | 0       | 0       | 0       |
| YRI | HIST2 | 149487469 | 0       | 0       | 0       |
| YRI | HIST2 | 149492469 | 0       | 0       | 0       |
| YRI | HIST2 | 149497469 | 0       | 0       | 0       |
| YRI | HIST2 | 149502469 | 0       | 0       | 0       |
| YRI | HIST2 | 149507469 | 0.4018  | 0.5042  | -0.3218 |
| YRI | HIST2 | 149512469 | 0.6674  | 2.0167  | -1.6133 |
| YRI | HIST2 | 149517469 | 0.4991  | 2.0167  | -1.8145 |
| YRI | HIST2 | 149522469 | 0.2335  | 0.5042  | -0.8507 |
| YRI | HIST2 | 149527469 | 0.2339  | 0.5042  | -0.8495 |
| YRI | HIST2 | 149532469 | 0.2339  | 0.5042  | -0.8495 |
| YRI | HIST2 | 149537469 | 0       | 0       | 0       |
| YRI | HIST2 | 149542469 | 0       | 0       | 0       |
| YRI | HIST2 | 149547469 | 0       | 0       | 0       |
| YRI | HIST2 | 149552469 | 0       | 0       | 0       |
| YRI | HIST2 | 149557469 | 0       | 0       | 0       |
| YRI | HIST2 | 149562469 | 0       | 0       | 0       |
| YRI | HIST2 | 149567469 | 0.5133  | 0.5042  | 0.0286  |
| YRI | HIST2 | 149572469 | 1.1098  | 1.6806  | -0.7853 |
| YRI | HIST2 | 149577469 | 0.9196  | 1.5126  | -0.883  |
| YRI | HIST2 | 149582469 | 2.3949  | 5.0419  | -1.4748 |
| YRI | HIST2 | 149587469 | 2.5097  | 5.7141  | -1.5979 |
| YRI | HIST2 | 149592469 | 1.2129  | 2.1848  | -1.0912 |
| YRI | HIST2 | 149597469 | 2.5434  | 3.0251  | -0.4155 |
| YRI | HIST2 | 149602469 | 5.6089  | 6.2183  | -0.2817 |
| YRI | HIST2 | 149607469 | 5.8919  | 6.8906  | -0.4208 |
| YRI | HIST2 | 149612469 | 2.6056  | 3.6974  | -0.7958 |
| YRI | HIST2 | 149617469 | 0.5543  | 1.1764  | -1.1127 |
| YRI | HIST2 | 149622469 | 0       | 0       | 0       |
| YRI | HIST2 | 149627469 | 0.0093  | 0.1681  | -0.944  |
| YRI | HIST2 | 149632469 | 0.3282  | 0.6722  | -0.9006 |
| YRI | HIST2 | 149637469 | 3.1146  | 2.0167  | 1.3127  |
| YRI | HIST2 | 149642469 | 4.0305  | 4.2016  | -0.1118 |
| YRI | HIST2 | 149647469 | 8.5881  | 9.4115  | -0.2606 |
| YRI | HIST2 | 149652469 | 9.8754  | 10.924  | -0.2888 |
| YRI | HIST2 | 149657469 | 5.7279  | 7.2267  | -0.6048 |
| YRI | HIST2 | 149662469 | 7.8479  | 7.8989  | -0.019  |
| YRI | HIST2 | 149667469 | 10.8516 | 13.1089 | -0.5236 |
| YRI | HIST2 | 149672469 | 10.2015 | 14.2853 | -0.8732 |
| YRI | HIST2 | 149677469 | 6.239   | 10.0837 | -1.1412 |
| YRI | HIST2 | 149682469 | 4.449   | 8.7392  | -1.4543 |
| YRI | HIST2 | 149687469 | 3.0618  | 8.5712  | -1.9013 |
| YRI | HIST2 | 149692469 | 3.0228  | 6.7225  | -1.5942 |
| YRI | HIST2 | 149697469 | 4.7415  | 7.0586  | -0.9552 |
| YRI | HIST2 | 149702469 | 8.2414  | 11.0921 | -0.774  |
| YRI | HIST2 | 149707469 | 10.0936 | 13.445  | -0.759  |
| YRI | HIST2 | 149712469 | 7.001   | 11.0921 | -1.1108 |
| YRI | HIST2 | 149717469 | 7.6164  | 11.2602 | -0.9755 |

## 2\_TajimasD\_data

|     |       |           |        |         |         |
|-----|-------|-----------|--------|---------|---------|
| YRI | HIST2 | 149722469 | 9.2696 | 12.7727 | -0.8328 |
| YRI | HIST2 | 149727469 | 8.9001 | 13.2769 | -1.0031 |
| YRI | HIST2 | 149732469 | 7.7605 | 12.6047 | -1.1661 |
| YRI | HIST2 | 149737469 | 4.3649 | 8.067   | -1.3509 |
| YRI | HIST2 | 149742469 | 4.2459 | 6.2183  | -0.9118 |
| YRI | HIST2 | 149747469 | 6.9196 | 7.5628  | -0.249  |
| YRI | HIST2 | 149752469 | 6.0807 | 7.5628  | -0.5738 |
| YRI | HIST2 | 149757469 | 6.1394 | 9.7476  | -1.1053 |
| YRI | HIST2 | 149762469 | 6.0299 | 10.5879 | -1.2926 |
| YRI | HIST2 | 149767469 | 3.4277 | 8.9073  | -1.825  |
| YRI | HIST2 | 149772469 | 5.4485 | 11.0921 | -1.5323 |
| YRI | HIST2 | 149777469 | 6.5247 | 12.1005 | -1.395  |
| YRI | HIST2 | 149782469 | 4.9324 | 13.2769 | -1.9124 |
| YRI | HIST2 | 149787469 | 4.2145 | 11.9324 | -1.9565 |
| YRI | HIST2 | 149792469 | 2.1767 | 5.2099  | -1.6418 |
| YRI | HIST2 | 149797469 | 0.4072 | 1.0084  | -1.1986 |
| YRI | HIST2 | 149802469 | 0      | 0       | 0       |
| YRI | HIST2 | 149807469 | 0      | 0       | 0       |
| YRI | HIST2 | 149812469 | 2.7381 | 4.8738  | -1.226  |
| YRI | HIST2 | 149817469 | 5.0549 | 8.5712  | -1.2135 |
| YRI | HIST2 | 149822469 | 2.7985 | 3.8654  | -0.7487 |
| YRI | HIST2 | 149827469 | 0.4817 | 0.1681  | 1.8643  |
| YRI | HIST2 | 149832469 | 0      | 0       | 0       |
| YRI | HIST2 | 149837469 | 0.0183 | 0.1681  | -0.8905 |
| YRI | HIST2 | 149842469 | 0.8756 | 2.689   | -1.7234 |
| YRI | HIST2 | 149847469 | 4.1965 | 9.4115  | -1.6505 |
| YRI | HIST2 | 149852469 | 5.6836 | 13.613  | -1.7748 |
| YRI | HIST2 | 149857469 | 4.0674 | 11.7644 | -1.9774 |
| YRI | HIST2 | 149862469 | 5.3263 | 11.5963 | -1.6327 |
| YRI | HIST2 | 149867469 | 7.5965 | 12.6047 | -1.2056 |
| YRI | HIST2 | 149872469 | 6.1608 | 11.2602 | -1.3651 |
| YRI | HIST2 | 149877469 | 7.021  | 11.4282 | -1.1635 |
| YRI | HIST2 | 149882469 | 8.3506 | 11.5963 | -0.8452 |
| YRI | HIST2 | 149887469 | 5.7786 | 11.9324 | -1.56   |
| YRI | HIST2 | 149892469 | 5.1776 | 12.7727 | -1.8056 |
| YRI | HIST2 | 149897469 | 4.6919 | 12.9408 | -1.937  |
| YRI | HIST2 | 149902469 | 3.9184 | 11.5963 | -1.9994 |
| YRI | HIST2 | 149907469 | 6.6719 | 11.5963 | -1.2823 |
| YRI | HIST2 | 149912469 | 6.3664 | 11.9324 | -1.411  |
| YRI | HIST2 | 149917469 | 5.7153 | 12.4366 | -1.6386 |
| YRI | HIST2 | 149922469 | 7.5886 | 14.2853 | -1.4318 |
| YRI | HIST2 | 149927469 | 8.3536 | 13.445  | -1.1531 |
| YRI | HIST2 | 149932469 | 9.4821 | 13.445  | -0.8975 |
| YRI | HIST2 | 149937469 | 8.992  | 12.4366 | -0.8398 |
| YRI | HIST2 | 149942469 | 5.9704 | 9.0754  | -1.0164 |
| YRI | HIST2 | 149947469 | 4.6609 | 8.7392  | -1.3824 |
| YRI | HIST2 | 149952469 | 7.7748 | 11.0921 | -0.9007 |
| YRI | HIST2 | 149957469 | 7.4467 | 10.924  | -0.9577 |
| YRI | HIST2 | 149962469 | 4.866  | 9.4115  | -1.4386 |

## 2\_TajimasD\_data

|     |       |           |         |         |         |
|-----|-------|-----------|---------|---------|---------|
| YRI | HIST2 | 149967469 | 6.4652  | 9.7476  | -1.0055 |
| YRI | HIST2 | 149972469 | 6.2536  | 8.9073  | -0.8838 |
| YRI | HIST2 | 149977469 | 6.8142  | 9.5795  | -0.8609 |
| YRI | HIST2 | 149982469 | 9.1001  | 12.2685 | -0.7824 |
| YRI | HIST2 | 149987469 | 9.771   | 12.2685 | -0.6168 |
| YRI | HIST2 | 149992469 | 9.44    | 13.613  | -0.934  |
| YRI | HIST2 | 149997469 | 13.5226 | 15.6298 | -0.4136 |
| YRI | HIST2 | 150002469 | 13.5417 | 13.7811 | -0.053  |
| YRI | HIST2 | 150007469 | 11.3461 | 15.2937 | -0.791  |
| YRI | HIST2 | 150012469 | 15.6615 | 17.6465 | -0.3469 |
| YRI | HIST2 | 150017469 | 15.5594 | 15.4617 | 0.0194  |
| YRI | HIST2 | 150022469 | 12.9184 | 15.1256 | -0.4469 |
| YRI | HIST2 | 150027469 | 11.7535 | 14.1172 | -0.5111 |
| YRI | HIST2 | 150032469 | 8.6821  | 11.2602 | -0.6902 |
| YRI | HIST2 | 150037469 | 8.5055  | 12.9408 | -1.0415 |
| YRI | HIST2 | 150042469 | 11.9886 | 14.7895 | -0.5794 |
| YRI | HIST2 | 150047469 | 11.5099 | 14.6214 | -0.6507 |
| YRI | HIST2 | 150052469 | 8.1547  | 13.2769 | -1.1739 |
| YRI | HIST2 | 150057469 | 7.1448  | 12.4366 | -1.2901 |
| YRI | HIST2 | 150062469 | 8.7056  | 12.9408 | -0.9945 |
| YRI | HIST2 | 150067469 | 8.7754  | 12.2685 | -0.8626 |
| YRI | HIST2 | 150072469 | 10.0818 | 14.2853 | -0.8987 |
| YRI | HIST2 | 150077469 | 12.226  | 17.1423 | -0.8833 |
| YRI | HIST2 | 150082469 | 9.9292  | 14.9575 | -1.0291 |
| YRI | HIST2 | 150087469 | 13.1052 | 15.6298 | -0.4955 |
| YRI | HIST2 | 150092469 | 15.3158 | 16.134  | -0.1558 |
| YRI | HIST2 | 150097469 | 11.3238 | 13.9492 | -0.5742 |
| YRI | HIST2 | 150102469 | 11.0643 | 14.7895 | -0.7706 |
| YRI | HIST2 | 150107469 | 11.6925 | 16.302  | -0.869  |
| YRI | HIST2 | 150112469 | 9.5648  | 15.1256 | -1.126  |
| YRI | HIST2 | 150117469 | 7.3353  | 13.2769 | -1.3617 |
| YRI | HIST2 | 150122469 | 8.5324  | 15.4617 | -1.374  |
| YRI | HIST2 | 150127469 | 10.02   | 15.4617 | -1.079  |
| YRI | HIST2 | 150132469 | 10.9919 | 15.4617 | -0.8863 |
| YRI | HIST2 | 150137469 | 13.1586 | 18.1507 | -0.8491 |
| YRI | HIST2 | 150142469 | 11.6313 | 15.7978 | -0.8094 |
| YRI | HIST2 | 150147469 | 7.5008  | 11.4282 | -1.0368 |
| YRI | HIST2 | 150152469 | 10.0533 | 13.613  | -0.7967 |
| YRI | HIST2 | 150157469 | 17.0935 | 19.4952 | -0.3814 |
| YRI | HIST2 | 150162469 | 16.3703 | 18.6549 | -0.3785 |
| YRI | HIST2 | 150167469 | 13.1734 | 15.6298 | -0.4821 |
| YRI | HIST2 | 150172469 | 12.4708 | 15.9659 | -0.6721 |
| YRI | HIST2 | 150177469 | 11.8583 | 15.4617 | -0.7145 |
| YRI | HIST2 | 150182469 | 12.0261 | 14.4534 | -0.5132 |
| YRI | HIST2 | 150187469 | 9.268   | 11.9324 | -0.6754 |
| YRI | HIST2 | 150192469 | 8.856   | 11.0921 | -0.6071 |
| YRI | HIST2 | 150197469 | 10.6334 | 10.924  | -0.08   |
| YRI | HIST2 | 150202469 | 11.243  | 10.924  | 0.0879  |
| YRI | HIST2 | 150207469 | 13.0353 | 14.1172 | -0.2339 |

## 2\_TajimasD\_data

|     |       |           |         |         |         |
|-----|-------|-----------|---------|---------|---------|
| YRI | HIST2 | 150212469 | 12.7722 | 14.7895 | -0.4173 |
| YRI | HIST2 | 150217469 | 11.9443 | 12.7727 | -0.1969 |
| YRI | HIST2 | 150222469 | 9.6681  | 10.5879 | -0.2609 |
| YRI | HIST2 | 150227469 | 4.6079  | 8.7392  | -1.4004 |
| YRI | HIST2 | 150232469 | 3.3738  | 7.7309  | -1.6532 |
| YRI | HIST2 | 150237469 | 3.6291  | 6.7225  | -1.3329 |
| YRI | HIST2 | 150242469 | 4.6251  | 9.2434  | -1.4863 |
| YRI | HIST2 | 150247469 | 6.5836  | 11.0921 | -1.2241 |
| YRI | HIST2 | 150252469 | 6.7318  | 10.4199 | -1.0617 |
| YRI | HIST2 | 150257469 | 10.2895 | 10.756  | -0.1304 |
| YRI | HIST2 | 150262469 | 14.7724 | 12.7727 | 0.4754  |
| YRI | HIST2 | 150267469 | 18.4065 | 16.6382 | 0.3269  |
| YRI | HIST2 | 150272469 | 16.5249 | 16.8062 | -0.0515 |
| YRI | HIST2 | 150277469 | 13.0402 | 14.9575 | -0.3924 |
| YRI | HIST2 | 150282469 | 12.9815 | 14.7895 | -0.374  |
| YRI | HIST2 | 150287469 | 11.4314 | 13.445  | -0.456  |
| YRI | HIST2 | 150292469 | 10.3231 | 12.1005 | -0.4447 |
| YRI | HIST2 | 150297469 | 9.3289  | 11.7644 | -0.6257 |
| YRI | HIST2 | 150302469 | 10.5637 | 11.9324 | -0.347  |
| YRI | HIST2 | 150307469 | 12.6697 | 14.4534 | -0.3772 |
| YRI | HIST2 | 150312469 | 12.7295 | 13.445  | -0.162  |
| YRI | HIST2 | 150317469 | 14.5579 | 13.613  | 0.2115  |
| YRI | HIST2 | 150322469 | 13.2606 | 15.1256 | -0.3776 |
| YRI | HIST2 | 150327469 | 12.4745 | 14.7895 | -0.4789 |
| YRI | HIST2 | 150332469 | 12.4071 | 14.1172 | -0.3698 |
| YRI | HIST2 | 150337469 | 10.6826 | 12.6047 | -0.4627 |
| YRI | HIST2 | 150342469 | 11.544  | 12.1005 | -0.1392 |
| YRI | HIST2 | 150347469 | 9.6714  | 10.5879 | -0.2599 |
| YRI | HIST2 | 150352469 | 13.1122 | 12.9408 | 0.0402  |
| YRI | HIST2 | 150357469 | 15.7741 | 15.4617 | 0.0619  |
| YRI | HIST2 | 150362469 | 11.8663 | 13.2769 | -0.3233 |
| YRI | HIST2 | 150367469 | 13.1349 | 14.4534 | -0.2788 |
| YRI | HIST2 | 150372469 | 16.3624 | 17.8146 | -0.2515 |
| YRI | HIST2 | 150377469 | 15.7318 | 16.8062 | -0.1967 |
| YRI | HIST2 | 150382469 | 16.4967 | 15.1256 | 0.2776  |
| CEU | LIMS3 | 109403688 | 4.7098  | 5.7991  | -0.5395 |
| CEU | LIMS3 | 109408688 | 4.9192  | 6.4814  | -0.7002 |
| CEU | LIMS3 | 109413688 | 5.2564  | 6.1402  | -0.4159 |
| CEU | LIMS3 | 109418688 | 4.6246  | 5.6286  | -0.5107 |
| CEU | LIMS3 | 109423688 | 4.9114  | 7.3342  | -0.9707 |
| CEU | LIMS3 | 109428688 | 4.2839  | 7.1636  | -1.1788 |
| CEU | LIMS3 | 109433688 | 5.2597  | 8.0164  | -1.0182 |
| CEU | LIMS3 | 109438688 | 5.5638  | 8.5281  | -1.0343 |
| CEU | LIMS3 | 109443688 | 5.8885  | 8.3576  | -0.8777 |
| CEU | LIMS3 | 109448688 | 5.3193  | 7.1636  | -0.755  |
| CEU | LIMS3 | 109453688 | 3.3234  | 5.7991  | -1.2262 |
| CEU | LIMS3 | 109458688 | 4.5762  | 6.9931  | -1.0113 |
| CEU | LIMS3 | 109463688 | 3.8551  | 6.3108  | -1.1275 |
| CEU | LIMS3 | 109468688 | 2.6794  | 4.9463  | -1.2928 |



## 2\_TajimasD\_data

|     |       |           |         |         |         |
|-----|-------|-----------|---------|---------|---------|
| CEU | LIMS3 | 109473688 | 3.7275  | 5.1169  | -0.7691 |
| CEU | LIMS3 | 109478688 | 5.0606  | 7.6753  | -1.005  |
| CEU | LIMS3 | 109483688 | 3.8866  | 6.9931  | -1.2998 |
| CEU | LIMS3 | 109488688 | 4.9128  | 7.1636  | -0.9214 |
| CEU | LIMS3 | 109493688 | 7.4005  | 10.0632 | -0.7968 |
| CEU | LIMS3 | 109498688 | 7.1305  | 9.8926  | -0.8399 |
| CEU | LIMS3 | 109503688 | 6.5887  | 9.8926  | -1.0046 |
| CEU | LIMS3 | 109508688 | 5.6197  | 8.8692  | -1.0935 |
| CEU | LIMS3 | 109513688 | 6.9163  | 9.5515  | -0.8279 |
| CEU | LIMS3 | 109518688 | 6.0045  | 9.3809  | -1.0786 |
| CEU | LIMS3 | 109523688 | 5.1233  | 8.8692  | -1.2605 |
| CEU | LIMS3 | 109528688 | 4.8437  | 8.3576  | -1.2491 |
| CEU | LIMS3 | 109533688 | 3.6693  | 6.4814  | -1.2604 |
| CEU | LIMS3 | 109538688 | 4.2321  | 7.6753  | -1.3235 |
| CEU | LIMS3 | 109543688 | 4.1901  | 9.5515  | -1.6843 |
| CEU | LIMS3 | 109548688 | 3.2132  | 9.8926  | -2.031  |
| CEU | LIMS3 | 109553688 | 5.4181  | 13.8156 | -1.865  |
| CEU | LIMS3 | 109558688 | 5.6364  | 11.5982 | -1.562  |
| CEU | LIMS3 | 109563688 | 2.7537  | 6.4814  | -1.6708 |
| CEU | LIMS3 | 109568688 | 3.2319  | 8.5281  | -1.8479 |
| CEU | LIMS3 | 109573688 | 3.3533  | 8.187   | -1.7511 |
| CEU | LIMS3 | 109578688 | 4.0524  | 8.187   | -1.4979 |
| CEU | LIMS3 | 109583688 | 3.959   | 8.6987  | -1.6238 |
| CEU | LIMS3 | 109588688 | 6.846   | 9.7221  | -0.8888 |
| CEU | LIMS3 | 109593688 | 13.4372 | 14.3272 | -0.191  |
| CEU | LIMS3 | 109598688 | 12.0418 | 14.1567 | -0.459  |
| CEU | LIMS3 | 109603688 | 7.0394  | 11.0866 | -1.1063 |
| CEU | LIMS3 | 109608688 | 6.1567  | 10.0632 | -1.1691 |
| CEU | LIMS3 | 109613688 | 6.5108  | 8.3576  | -0.6565 |
| CEU | LIMS3 | 109618688 | 5.361   | 5.7991  | -0.217  |
| CEU | LIMS3 | 109623688 | 6.3364  | 6.6519  | -0.1381 |
| CEU | LIMS3 | 109628688 | 8.6265  | 11.0866 | -0.6725 |
| CEU | LIMS3 | 109633688 | 8.5883  | 11.0866 | -0.6829 |
| CEU | LIMS3 | 109638688 | 6.2554  | 7.3342  | -0.4322 |
| CEU | LIMS3 | 109643688 | 4.0765  | 5.1169  | -0.5759 |
| CEU | LIMS3 | 109648688 | 3.4834  | 4.7757  | -0.7601 |
| CEU | LIMS3 | 109653688 | 2.3102  | 4.6052  | -1.3934 |
| CEU | LIMS3 | 109658688 | 1.7444  | 5.6286  | -1.9757 |
| CEU | LIMS3 | 109663688 | 2.8563  | 6.3108  | -1.586  |
| CEU | LIMS3 | 109668688 | 4.2045  | 6.9931  | -1.1668 |
| CEU | LIMS3 | 109673688 | 7.9041  | 8.8692  | -0.3248 |
| CEU | LIMS3 | 109678688 | 11.4296 | 10.2337 | 0.3523  |
| CEU | LIMS3 | 109683688 | 9.9371  | 8.6987  | 0.4243  |
| CEU | LIMS3 | 109688688 | 10.2416 | 8.3576  | 0.6697  |
| CEU | LIMS3 | 109693688 | 12.173  | 11.2571 | 0.2468  |
| CEU | LIMS3 | 109698688 | 11.0544 | 10.4043 | 0.1886  |
| CEU | LIMS3 | 109703688 | 7.9722  | 8.0164  | -0.0163 |
| CEU | LIMS3 | 109708688 | 7.5869  | 7.5047  | 0.0323  |
| CEU | LIMS3 | 109713688 | 6.3758  | 5.7991  | 0.2856  |

## 2\_TajimasD\_data

|     |       |           |         |         |         |
|-----|-------|-----------|---------|---------|---------|
| CEU | LIMS3 | 109718688 | 3.7969  | 4.7757  | -0.5757 |
| CEU | LIMS3 | 109723688 | 2.5345  | 4.6052  | -1.2572 |
| CEU | LIMS3 | 109728688 | 2.0765  | 3.9229  | -1.2878 |
| CEU | LIMS3 | 109733688 | 2.4045  | 4.4346  | -1.2738 |
| CEU | LIMS3 | 109738688 | 3.1752  | 5.9697  | -1.3487 |
| CEU | LIMS3 | 109743688 | 6.4776  | 7.1636  | -0.2808 |
| CEU | LIMS3 | 109748688 | 8.9291  | 8.5281  | 0.1399  |
| CEU | LIMS3 | 109753688 | 8.9309  | 8.6987  | 0.0796  |
| CEU | LIMS3 | 109758688 | 7.0202  | 7.3342  | -0.1258 |
| CEU | LIMS3 | 109763688 | 8.8005  | 7.5047  | 0.5084  |
| CEU | LIMS3 | 109768688 | 10.6207 | 8.187   | 0.8817  |
| CEU | LIMS3 | 109773688 | 10.3659 | 8.6987  | 0.5712  |
| CEU | LIMS3 | 109778688 | 10.9415 | 9.3809  | 0.4986  |
| CEU | LIMS3 | 109783688 | 11.6726 | 10.2337 | 0.4239  |
| CEU | LIMS3 | 109788688 | 9.329   | 8.3576  | 0.3453  |
| CEU | LIMS3 | 109793688 | 6.0781  | 6.8225  | -0.3185 |
| CEU | LIMS3 | 109798688 | 6.8606  | 8.0164  | -0.4269 |
| CEU | LIMS3 | 109803688 | 11.6657 | 11.2571 | 0.1101  |
| CEU | LIMS3 | 109808688 | 11.7863 | 10.5749 | 0.3461  |
| CEU | LIMS3 | 109813688 | 8.2472  | 7.8459  | 0.1512  |
| CEU | LIMS3 | 109818688 | 11.6994 | 9.7221  | 0.611   |
| CEU | LIMS3 | 109823688 | 13.227  | 11.5982 | 0.4268  |
| CEU | LIMS3 | 109828688 | 10.9328 | 10.7454 | 0.0527  |
| CEU | LIMS3 | 109833688 | 9.7636  | 9.7221  | 0.0128  |
| CEU | LIMS3 | 109838688 | 7.8658  | 9.2104  | -0.4369 |
| CEU | LIMS3 | 109843688 | 5.0959  | 8.6987  | -1.2343 |
| CEU | LIMS3 | 109848688 | 3.8411  | 7.8459  | -1.5087 |
| CEU | LIMS3 | 109853688 | 5.2599  | 6.4814  | -0.5475 |
| CEU | LIMS3 | 109858688 | 6.7737  | 7.6753  | -0.3466 |
| CEU | LIMS3 | 109863688 | 5.4616  | 8.0164  | -0.9436 |
| CEU | LIMS3 | 109868688 | 4.5706  | 6.6519  | -0.9112 |
| CEU | LIMS3 | 109873688 | 8.9862  | 8.3576  | 0.2234  |
| CEU | LIMS3 | 109878688 | 12.4261 | 9.5515  | 0.9031  |
| CEU | LIMS3 | 109883688 | 9.5916  | 7.5047  | 0.8188  |
| CEU | LIMS3 | 109888688 | 6.9555  | 6.3108  | 0.296   |
| CEU | LIMS3 | 109893688 | 9.4391  | 6.8225  | 1.1196  |
| CEU | LIMS3 | 109898688 | 8.8066  | 7.1636  | 0.6726  |
| CEU | LIMS3 | 109903688 | 4.5178  | 4.9463  | -0.2444 |
| CEU | LIMS3 | 109908688 | 3.6261  | 5.1169  | -0.8252 |
| CEU | LIMS3 | 109913688 | 4.5875  | 6.1402  | -0.7307 |
| CEU | LIMS3 | 109918688 | 16.6767 | 10.7454 | 1.6695  |
| CEU | LIMS3 | 109923688 | 23.327  | 13.645  | 2.1758  |
| CEU | LIMS3 | 109928688 | 37.5088 | 20.2969 | 2.6455  |
| CEU | LIMS3 | 109933688 | 37.4306 | 21.1497 | 2.405   |
| CEU | LIMS3 | 109938688 | 15.5859 | 9.8926  | 1.7312  |
| CEU | LIMS3 | 109943688 | 9.0258  | 7.3342  | 0.6778  |
| CEU | LIMS3 | 109948688 | 9.9289  | 9.3809  | 0.1751  |
| CEU | LIMS3 | 109953688 | 10.804  | 9.2104  | 0.5178  |
| CEU | LIMS3 | 109958688 | 9.6252  | 8.5281  | 0.3828  |

## 2\_TajimasD\_data

|     |       |           |         |         |         |
|-----|-------|-----------|---------|---------|---------|
| CEU | LIMS3 | 109963688 | 9.3329  | 9.2104  | 0.0398  |
| CEU | LIMS3 | 109968688 | 5.8462  | 9.3809  | -1.1292 |
| CEU | LIMS3 | 109973688 | 7.0089  | 10.2337 | -0.95   |
| CEU | LIMS3 | 109978688 | 7.0231  | 11.0866 | -1.1107 |
| CEU | LIMS3 | 109983688 | 7.263   | 12.1099 | -1.2193 |
| CEU | LIMS3 | 109988688 | 10.8005 | 14.8389 | -0.838  |
| CEU | LIMS3 | 109993688 | 10.6242 | 14.6684 | -0.8485 |
| CEU | LIMS3 | 109998688 | 12.6887 | 12.1099 | 0.1456  |
| CEU | LIMS3 | 110003688 | 19.2179 | 12.2805 | 1.7224  |
| CEU | LIMS3 | 110008688 | 14.7704 | 9.7221  | 1.5601  |
| CEU | LIMS3 | 110013688 | 11.7233 | 8.3576  | 1.1964  |
| CEU | LIMS3 | 110018688 | 15.822  | 12.1099 | 0.9339  |
| CEU | LIMS3 | 110023688 | 15.92   | 14.4978 | 0.3017  |
| CEU | LIMS3 | 110028688 | 13.3408 | 11.5982 | 0.4566  |
| CEU | LIMS3 | 110033688 | 7.7404  | 8.8692  | -0.3798 |
| CEU | LIMS3 | 110038688 | 10.4079 | 10.5749 | -0.0477 |
| CEU | LIMS3 | 110043688 | 12.9819 | 10.5749 | 0.6877  |
| CEU | LIMS3 | 110048688 | 7.8192  | 8.0164  | -0.0728 |
| CEU | LIMS3 | 110053688 | 6.5947  | 6.6519  | -0.025  |
| CEU | LIMS3 | 110058688 | 6.1641  | 7.1636  | -0.4091 |
| CEU | LIMS3 | 110063688 | 4.0668  | 7.1636  | -1.2677 |
| CEU | LIMS3 | 110068688 | 3.7355  | 5.7991  | -1.0221 |
| CEU | LIMS3 | 110073688 | 3.8621  | 6.1402  | -1.072  |
| CEU | LIMS3 | 110078688 | 5.5545  | 7.6753  | -0.8152 |
| CEU | LIMS3 | 110083688 | 5.4824  | 6.9931  | -0.6321 |
| CEU | LIMS3 | 110088688 | 4.4085  | 7.5047  | -1.2148 |
| CEU | LIMS3 | 110093688 | 5.0288  | 7.5047  | -0.9714 |
| CEU | LIMS3 | 110098688 | 5.1148  | 5.7991  | -0.3389 |
| CEU | LIMS3 | 110103688 | 6.462   | 8.0164  | -0.5741 |
| CEU | LIMS3 | 110108688 | 5.2665  | 5.9697  | -0.3394 |
| CEU | LIMS3 | 110113688 | 1.2816  | 1.0234  | 0.5131  |
| CEU | LIMS3 | 110118688 | 0       | 0       | 0       |
| CEU | LIMS3 | 110123688 | 0       | 0       | 0       |
| CEU | LIMS3 | 110128688 | 0       | 0       | 0       |
| CEU | LIMS3 | 110133688 | 0       | 0       | 0       |
| CEU | LIMS3 | 110138688 | 0       | 0       | 0       |
| CEU | LIMS3 | 110143688 | 0       | 0       | 0       |
| CEU | LIMS3 | 110148688 | 0       | 0       | 0       |
| CEU | LIMS3 | 110153688 | 0       | 0       | 0       |
| CEU | LIMS3 | 110158688 | 0       | 0       | 0       |
| CEU | LIMS3 | 110163688 | 0       | 0       | 0       |
| CEU | LIMS3 | 110168688 | 0       | 0       | 0       |
| CEU | LIMS3 | 110173688 | 0       | 0       | 0       |
| CEU | LIMS3 | 110178688 | 0       | 0       | 0       |
| CEU | LIMS3 | 110183688 | 0       | 0       | 0       |
| CEU | LIMS3 | 110188688 | 0       | 0       | 0       |
| CEU | LIMS3 | 110193688 | 0       | 0       | 0       |
| CEU | LIMS3 | 110198688 | 0       | 0       | 0       |
| CEU | LIMS3 | 110203688 | 0       | 0       | 0       |

## 2\_TajimasD\_data

|     |       |           |         |         |         |
|-----|-------|-----------|---------|---------|---------|
| CEU | LIMS3 | 110208688 | 0       | 0       | 0       |
| CEU | LIMS3 | 110213688 | 0       | 0       | 0       |
| CEU | LIMS3 | 110218688 | 0       | 0       | 0       |
| CEU | LIMS3 | 110223688 | 0       | 0       | 0       |
| CEU | LIMS3 | 110228688 | 0       | 0       | 0       |
| CEU | LIMS3 | 110233688 | 0       | 0       | 0       |
| CEU | LIMS3 | 110238688 | 0       | 0       | 0       |
| CEU | LIMS3 | 110243688 | 0       | 0       | 0       |
| CEU | LIMS3 | 110248688 | 7.8068  | 4.6052  | 1.9438  |
| CEU | LIMS3 | 110253688 | 22.6996 | 13.4744 | 2.098   |
| CEU | LIMS3 | 110258688 | 17.4795 | 12.7922 | 1.1197  |
| CEU | LIMS3 | 110263688 | 7.5506  | 9.0398  | -0.4924 |
| CEU | LIMS3 | 110268688 | 10.357  | 9.5515  | 0.2531  |
| CEU | LIMS3 | 110273688 | 9.3548  | 9.8926  | -0.1635 |
| CEU | LIMS3 | 110278688 | 7.5259  | 10.0632 | -0.7593 |
| CEU | LIMS3 | 110283688 | 6.1288  | 8.0164  | -0.6972 |
| CEU | LIMS3 | 110288688 | 5.7671  | 6.1402  | -0.1756 |
| CEU | LIMS3 | 110293688 | 7.1538  | 7.5047  | -0.1377 |
| CEU | LIMS3 | 110298688 | 6.2814  | 9.3809  | -0.9902 |
| CEU | LIMS3 | 110303688 | 6.5475  | 8.187   | -0.594  |
| CEU | LIMS3 | 110308688 | 6.4696  | 6.3108  | 0.0729  |
| CEU | LIMS3 | 110313688 | 6.2915  | 6.1402  | 0.0712  |
| CEU | LIMS3 | 110318688 | 7.604   | 6.9931  | 0.2556  |
| CEU | LIMS3 | 110323688 | 7.0614  | 8.0164  | -0.3527 |
| CEU | LIMS3 | 110328688 | 8.9567  | 9.8926  | -0.2846 |
| CEU | LIMS3 | 110333688 | 9.3948  | 10.4043 | -0.2928 |
| CEU | LIMS3 | 110338688 | 5.8448  | 8.5281  | -0.9362 |
| CEU | LIMS3 | 110343688 | 6.2501  | 8.3576  | -0.7492 |
| CEU | LIMS3 | 110348688 | 8.5753  | 8.0164  | 0.2064  |
| CEU | LIMS3 | 110353688 | 7.9893  | 6.1402  | 0.8701  |
| CEU | LIMS3 | 110358688 | 6.7041  | 6.9931  | -0.1209 |
| CEU | LIMS3 | 110363688 | 8.1021  | 8.6987  | -0.2044 |
| CEU | LIMS3 | 110368688 | 8.838   | 8.187   | 0.2358  |
| CEU | LIMS3 | 110373688 | 8.0499  | 6.9931  | 0.4422  |
| CEU | LIMS3 | 110378688 | 8.7456  | 7.6753  | 0.4114  |
| CEU | LIMS3 | 110383688 | 10.4108 | 9.2104  | 0.3901  |
| CEU | LIMS3 | 110388688 | 13.826  | 11.4277 | 0.6372  |
| CEU | LIMS3 | 110393688 | 16.3519 | 13.3039 | 0.7016  |
| CEU | LIMS3 | 110398688 | 15.0707 | 12.1099 | 0.7449  |
| CEU | LIMS3 | 110403688 | 13.0031 | 11.0866 | 0.5239  |
| CEU | LIMS3 | 110408688 | 9.2402  | 9.5515  | -0.0978 |
| CEU | LIMS3 | 110413688 | 7.9817  | 8.187   | -0.0744 |
| CEU | LIMS3 | 110418688 | 10.8163 | 8.5281  | 0.7984  |
| CHB | LIMS3 | 109403688 | 1.3699  | 6.946   | -2.3406 |
| CHB | LIMS3 | 109408688 | 1.894   | 7.7931  | -2.2295 |
| CHB | LIMS3 | 109413688 | 2.1224  | 7.9625  | -2.1642 |
| CHB | LIMS3 | 109418688 | 1.6242  | 6.7766  | -2.2117 |
| CHB | LIMS3 | 109423688 | 1.6855  | 5.5907  | -1.9925 |
| CHB | LIMS3 | 109428688 | 1.7832  | 5.9295  | -2.0073 |

## 2\_TajimasD\_data

|     |       |           |        |         |         |
|-----|-------|-----------|--------|---------|---------|
| CHB | LIMS3 | 109433688 | 1.9417 | 6.946   | -2.1006 |
| CHB | LIMS3 | 109438688 | 1.9924 | 7.7931  | -2.1924 |
| CHB | LIMS3 | 109443688 | 2.6887 | 10.6731 | -2.2551 |
| CHB | LIMS3 | 109448688 | 3.1814 | 11.1814 | -2.1631 |
| CHB | LIMS3 | 109453688 | 2.3688 | 9.8261  | -2.2752 |
| CHB | LIMS3 | 109458688 | 2.4098 | 9.8261  | -2.2627 |
| CHB | LIMS3 | 109463688 | 1.8605 | 6.946   | -2.1347 |
| CHB | LIMS3 | 109468688 | 1.3628 | 5.9295  | -2.2108 |
| CHB | LIMS3 | 109473688 | 2.2686 | 8.3013  | -2.1515 |
| CHB | LIMS3 | 109478688 | 2.7534 | 8.979   | -2.0652 |
| CHB | LIMS3 | 109483688 | 1.8676 | 8.1319  | -2.2769 |
| CHB | LIMS3 | 109488688 | 2.4194 | 9.9955  | -2.275  |
| CHB | LIMS3 | 109493688 | 3.4942 | 12.3673 | -2.1821 |
| CHB | LIMS3 | 109498688 | 3.0862 | 11.3508 | -2.2033 |
| CHB | LIMS3 | 109503688 | 3.016  | 10.6731 | -2.1627 |
| CHB | LIMS3 | 109508688 | 2.8883 | 9.8261  | -2.1167 |
| CHB | LIMS3 | 109513688 | 3.4194 | 11.012  | -2.0826 |
| CHB | LIMS3 | 109518688 | 2.9132 | 11.012  | -2.2214 |
| CHB | LIMS3 | 109523688 | 2.2522 | 10.5037 | -2.3657 |
| CHB | LIMS3 | 109528688 | 2.2066 | 10.1649 | -2.3526 |
| CHB | LIMS3 | 109533688 | 1.6938 | 7.9625  | -2.323  |
| CHB | LIMS3 | 109538688 | 1.7935 | 7.7931  | -2.2675 |
| CHB | LIMS3 | 109543688 | 2.0029 | 8.4708  | -2.2642 |
| CHB | LIMS3 | 109548688 | 1.9355 | 9.3178  | -2.3663 |
| CHB | LIMS3 | 109553688 | 2.4273 | 14.2309 | -2.5415 |
| CHB | LIMS3 | 109558688 | 2.1783 | 13.045  | -2.541  |
| CHB | LIMS3 | 109563688 | 1.649  | 8.4708  | -2.3881 |
| CHB | LIMS3 | 109568688 | 1.7592 | 9.3178  | -2.4228 |
| CHB | LIMS3 | 109573688 | 1.7504 | 8.979   | -2.398  |
| CHB | LIMS3 | 109578688 | 2.2743 | 9.8261  | -2.3041 |
| CHB | LIMS3 | 109583688 | 2.6126 | 10.1649 | -2.2325 |
| CHB | LIMS3 | 109588688 | 2.8875 | 10.5037 | -2.1835 |
| CHB | LIMS3 | 109593688 | 5.9191 | 13.892  | -1.7564 |
| CHB | LIMS3 | 109598688 | 6.3982 | 13.892  | -1.6509 |
| CHB | LIMS3 | 109603688 | 4.2012 | 11.8591 | -1.9592 |
| CHB | LIMS3 | 109608688 | 3.3611 | 10.5037 | -2.0478 |
| CHB | LIMS3 | 109613688 | 3.023  | 9.6567  | -2.057  |
| CHB | LIMS3 | 109618688 | 3.0876 | 8.6402  | -1.9086 |
| CHB | LIMS3 | 109623688 | 2.9534 | 8.8096  | -1.9772 |
| CHB | LIMS3 | 109628688 | 4.075  | 11.8591 | -1.9915 |
| CHB | LIMS3 | 109633688 | 7.4319 | 11.6896 | -1.1042 |
| CHB | LIMS3 | 109638688 | 7.095  | 8.8096  | -0.5789 |
| CHB | LIMS3 | 109643688 | 4.1041 | 7.6237  | -1.3573 |
| CHB | LIMS3 | 109648688 | 4.3053 | 9.9955  | -1.7087 |
| CHB | LIMS3 | 109653688 | 6.2732 | 15.5862 | -1.8388 |
| CHB | LIMS3 | 109658688 | 8.5622 | 15.7556 | -1.4057 |
| CHB | LIMS3 | 109663688 | 6.2086 | 10.1649 | -1.1695 |
| CHB | LIMS3 | 109668688 | 4.6284 | 7.7931  | -1.1961 |
| CHB | LIMS3 | 109673688 | 9.0244 | 9.3178  | -0.094  |

## 2\_TajimasD\_data

|     |       |           |         |         |         |
|-----|-------|-----------|---------|---------|---------|
| CHB | LIMS3 | 109678688 | 10.819  | 10.5037 | 0.0904  |
| CHB | LIMS3 | 109683688 | 8.3912  | 9.3178  | -0.297  |
| CHB | LIMS3 | 109688688 | 8.0811  | 8.6402  | -0.1922 |
| CHB | LIMS3 | 109693688 | 10.6052 | 10.6731 | -0.0192 |
| CHB | LIMS3 | 109698688 | 10.3225 | 11.1814 | -0.2322 |
| CHB | LIMS3 | 109703688 | 7.7419  | 8.8096  | -0.3605 |
| CHB | LIMS3 | 109708688 | 7.3606  | 8.6402  | -0.4398 |
| CHB | LIMS3 | 109713688 | 5.4184  | 6.6072  | -0.5221 |
| CHB | LIMS3 | 109718688 | 4.3324  | 5.2519  | -0.4959 |
| CHB | LIMS3 | 109723688 | 3.2046  | 6.0989  | -1.3662 |
| CHB | LIMS3 | 109728688 | 2.5877  | 5.4213  | -1.4859 |
| CHB | LIMS3 | 109733688 | 3.7061  | 7.1154  | -1.4001 |
| CHB | LIMS3 | 109738688 | 3.5096  | 7.7931  | -1.6189 |
| CHB | LIMS3 | 109743688 | 5.6737  | 7.1154  | -0.5921 |
| CHB | LIMS3 | 109748688 | 6.7843  | 6.7766  | 0.0033  |
| CHB | LIMS3 | 109753688 | 6.5427  | 6.7766  | -0.1004 |
| CHB | LIMS3 | 109758688 | 7.0689  | 9.3178  | -0.7209 |
| CHB | LIMS3 | 109763688 | 8.2644  | 8.979   | -0.2371 |
| CHB | LIMS3 | 109768688 | 9.474   | 7.6237  | 0.7135  |
| CHB | LIMS3 | 109773688 | 9.667   | 8.1319  | 0.558   |
| CHB | LIMS3 | 109778688 | 10.0737 | 11.012  | -0.2574 |
| CHB | LIMS3 | 109783688 | 12.6945 | 13.5532 | -0.1937 |
| CHB | LIMS3 | 109788688 | 10.6082 | 10.3343 | 0.0797  |
| CHB | LIMS3 | 109793688 | 7.0284  | 8.1319  | -0.4011 |
| CHB | LIMS3 | 109798688 | 7.5486  | 8.8096  | -0.4257 |
| CHB | LIMS3 | 109803688 | 11.7122 | 11.8591 | -0.0376 |
| CHB | LIMS3 | 109808688 | 12.3653 | 12.3673 | -0.0005 |
| CHB | LIMS3 | 109813688 | 9.143   | 10.6731 | -0.4322 |
| CHB | LIMS3 | 109818688 | 11.4853 | 11.6896 | -0.053  |
| CHB | LIMS3 | 109823688 | 13.0703 | 12.1979 | 0.2174  |
| CHB | LIMS3 | 109828688 | 10.5094 | 10.3343 | 0.051   |
| CHB | LIMS3 | 109833688 | 8.9503  | 8.979   | -0.0095 |
| CHB | LIMS3 | 109838688 | 11.0063 | 9.1484  | 0.6057  |
| CHB | LIMS3 | 109843688 | 10.4279 | 10.5037 | -0.0217 |
| CHB | LIMS3 | 109848688 | 6.5637  | 10.6731 | -1.1607 |
| CHB | LIMS3 | 109853688 | 6.6975  | 11.5202 | -1.268  |
| CHB | LIMS3 | 109858688 | 7.4156  | 12.7061 | -1.2683 |
| CHB | LIMS3 | 109863688 | 6.521   | 12.0285 | -1.3904 |
| CHB | LIMS3 | 109868688 | 6.732   | 12.0285 | -1.3371 |
| CHB | LIMS3 | 109873688 | 10.3903 | 10.8426 | -0.1259 |
| CHB | LIMS3 | 109878688 | 12.1687 | 10.1649 | 0.5923  |
| CHB | LIMS3 | 109883688 | 8.6349  | 8.4708  | 0.0574  |
| CHB | LIMS3 | 109888688 | 7.2753  | 8.8096  | -0.518  |
| CHB | LIMS3 | 109893688 | 8.6288  | 8.8096  | -0.061  |
| CHB | LIMS3 | 109898688 | 7.4584  | 6.2684  | 0.5481  |
| CHB | LIMS3 | 109903688 | 4.7929  | 5.5907  | -0.4071 |
| CHB | LIMS3 | 109908688 | 5.1163  | 9.8261  | -1.437  |
| CHB | LIMS3 | 109913688 | 5.4297  | 12.3673 | -1.7061 |
| CHB | LIMS3 | 109918688 | 14.6509 | 14.7391 | -0.0184 |

## 2\_TajimasD\_data

|     |       |           |         |         |         |
|-----|-------|-----------|---------|---------|---------|
| CHB | LIMS3 | 109923688 | 22.6194 | 15.925  | 1.2949  |
| CHB | LIMS3 | 109928688 | 41.1528 | 21.5157 | 2.8449  |
| CHB | LIMS3 | 109933688 | 41.2879 | 23.8875 | 2.2783  |
| CHB | LIMS3 | 109938688 | 14.8202 | 14.0615 | 0.1652  |
| CHB | LIMS3 | 109943688 | 6.9223  | 9.9955  | -0.9228 |
| CHB | LIMS3 | 109948688 | 8.7124  | 9.8261  | -0.3398 |
| CHB | LIMS3 | 109953688 | 8.8643  | 9.8261  | -0.2934 |
| CHB | LIMS3 | 109958688 | 5.5644  | 9.8261  | -1.3002 |
| CHB | LIMS3 | 109963688 | 4.8704  | 8.8096  | -1.33   |
| CHB | LIMS3 | 109968688 | 3.6031  | 9.3178  | -1.8318 |
| CHB | LIMS3 | 109973688 | 3.1578  | 11.1814 | -2.1695 |
| CHB | LIMS3 | 109978688 | 3.3745  | 11.5202 | -2.1416 |
| CHB | LIMS3 | 109983688 | 3.2935  | 12.5367 | -2.2441 |
| CHB | LIMS3 | 109988688 | 5.6014  | 16.6027 | -2.045  |
| CHB | LIMS3 | 109993688 | 6.8523  | 16.2638 | -1.7843 |
| CHB | LIMS3 | 109998688 | 9.0034  | 13.892  | -1.077  |
| CHB | LIMS3 | 110003688 | 16.8943 | 15.0779 | 0.3702  |
| CHB | LIMS3 | 110008688 | 14.6196 | 13.892  | 0.1603  |
| CHB | LIMS3 | 110013688 | 11.3138 | 13.3838 | -0.4724 |
| CHB | LIMS3 | 110018688 | 15.4562 | 15.2474 | 0.0421  |
| CHB | LIMS3 | 110023688 | 17.5582 | 17.2803 | 0.0497  |
| CHB | LIMS3 | 110028688 | 14.5304 | 14.0615 | 0.1021  |
| CHB | LIMS3 | 110033688 | 7.8188  | 10.3343 | -0.7322 |
| CHB | LIMS3 | 110038688 | 11.0432 | 10.8426 | 0.0558  |
| CHB | LIMS3 | 110043688 | 13.4043 | 10.8426 | 0.7129  |
| CHB | LIMS3 | 110048688 | 8.2172  | 9.9955  | -0.534  |
| CHB | LIMS3 | 110053688 | 6.7432  | 8.4708  | -0.6048 |
| CHB | LIMS3 | 110058688 | 5.7436  | 7.2848  | -0.6195 |
| CHB | LIMS3 | 110063688 | 3.8028  | 5.7601  | -0.9724 |
| CHB | LIMS3 | 110068688 | 3.8125  | 5.0825  | -0.7051 |
| CHB | LIMS3 | 110073688 | 3.5315  | 4.913   | -0.7902 |
| CHB | LIMS3 | 110078688 | 5.0921  | 5.7601  | -0.3319 |
| CHB | LIMS3 | 110083688 | 5.1656  | 6.0989  | -0.4406 |
| CHB | LIMS3 | 110088688 | 3.9415  | 6.7766  | -1.217  |
| CHB | LIMS3 | 110093688 | 4.5946  | 7.4543  | -1.1257 |
| CHB | LIMS3 | 110098688 | 4.8905  | 7.7931  | -1.097  |
| CHB | LIMS3 | 110103688 | 7.246   | 10.8426 | -1.001  |
| CHB | LIMS3 | 110108688 | 6.4951  | 7.6237  | -0.4352 |
| CHB | LIMS3 | 110113688 | 1.6526  | 1.1859  | 0.8331  |
| CHB | LIMS3 | 110118688 | 0       | 0       | 0       |
| CHB | LIMS3 | 110123688 | 0       | 0       | 0       |
| CHB | LIMS3 | 110128688 | 0       | 0       | 0       |
| CHB | LIMS3 | 110133688 | 0       | 0       | 0       |
| CHB | LIMS3 | 110138688 | 0       | 0       | 0       |
| CHB | LIMS3 | 110143688 | 0       | 0       | 0       |
| CHB | LIMS3 | 110148688 | 0       | 0       | 0       |
| CHB | LIMS3 | 110153688 | 0       | 0       | 0       |
| CHB | LIMS3 | 110158688 | 0       | 0       | 0       |
| CHB | LIMS3 | 110163688 | 0       | 0       | 0       |

## 2\_TajimasD\_data

|     |       |           |         |         |         |
|-----|-------|-----------|---------|---------|---------|
| CHB | LIMS3 | 110168688 | 0       | 0       | 0       |
| CHB | LIMS3 | 110173688 | 0       | 0       | 0       |
| CHB | LIMS3 | 110178688 | 0       | 0       | 0       |
| CHB | LIMS3 | 110183688 | 0       | 0       | 0       |
| CHB | LIMS3 | 110188688 | 0       | 0       | 0       |
| CHB | LIMS3 | 110193688 | 0       | 0       | 0       |
| CHB | LIMS3 | 110198688 | 0       | 0       | 0       |
| CHB | LIMS3 | 110203688 | 0       | 0       | 0       |
| CHB | LIMS3 | 110208688 | 0       | 0       | 0       |
| CHB | LIMS3 | 110213688 | 0       | 0       | 0       |
| CHB | LIMS3 | 110218688 | 0       | 0       | 0       |
| CHB | LIMS3 | 110223688 | 0       | 0       | 0       |
| CHB | LIMS3 | 110228688 | 0       | 0       | 0       |
| CHB | LIMS3 | 110233688 | 0       | 0       | 0       |
| CHB | LIMS3 | 110238688 | 0       | 0       | 0       |
| CHB | LIMS3 | 110243688 | 0       | 0       | 0       |
| CHB | LIMS3 | 110248688 | 10.916  | 6.0989  | 2.2739  |
| CHB | LIMS3 | 110253688 | 29.3543 | 18.2968 | 1.8726  |
| CHB | LIMS3 | 110258688 | 21.3265 | 17.4498 | 0.6871  |
| CHB | LIMS3 | 110263688 | 6.4418  | 12.0285 | -1.4104 |
| CHB | LIMS3 | 110268688 | 10.3099 | 11.6896 | -0.3578 |
| CHB | LIMS3 | 110273688 | 15.1458 | 16.9415 | -0.3274 |
| CHB | LIMS3 | 110278688 | 15.5967 | 20.1604 | -0.704  |
| CHB | LIMS3 | 110283688 | 10.4714 | 11.5202 | -0.2757 |
| CHB | LIMS3 | 110288688 | 5.6313  | 6.6072  | -0.4286 |
| CHB | LIMS3 | 110293688 | 6.1498  | 7.6237  | -0.5684 |
| CHB | LIMS3 | 110298688 | 6.4232  | 8.979   | -0.8478 |
| CHB | LIMS3 | 110303688 | 6.9467  | 7.6237  | -0.2611 |
| CHB | LIMS3 | 110308688 | 6.3914  | 6.4378  | -0.0209 |
| CHB | LIMS3 | 110313688 | 5.264   | 8.3013  | -1.0832 |
| CHB | LIMS3 | 110318688 | 7.4123  | 8.979   | -0.5197 |
| CHB | LIMS3 | 110323688 | 9.9061  | 8.979   | 0.3075  |
| CHB | LIMS3 | 110328688 | 10.8964 | 8.6402  | 0.7755  |
| CHB | LIMS3 | 110333688 | 9.4445  | 9.9955  | -0.1655 |
| CHB | LIMS3 | 110338688 | 6.9425  | 9.9955  | -0.9168 |
| CHB | LIMS3 | 110343688 | 7.3234  | 9.4872  | -0.6821 |
| CHB | LIMS3 | 110348688 | 8.3036  | 9.6567  | -0.4196 |
| CHB | LIMS3 | 110353688 | 7.4243  | 7.7931  | -0.1394 |
| CHB | LIMS3 | 110358688 | 7.3941  | 7.2848  | 0.0439  |
| CHB | LIMS3 | 110363688 | 8.7712  | 7.9625  | 0.2997  |
| CHB | LIMS3 | 110368688 | 8.2972  | 9.4872  | -0.3751 |
| CHB | LIMS3 | 110373688 | 6.5667  | 9.8261  | -0.9944 |
| CHB | LIMS3 | 110378688 | 7.8749  | 9.6567  | -0.5525 |
| CHB | LIMS3 | 110383688 | 11.0786 | 10.8426 | 0.0657  |
| CHB | LIMS3 | 110388688 | 14.6339 | 12.1979 | 0.6069  |
| CHB | LIMS3 | 110393688 | 17.0603 | 13.5532 | 0.7909  |
| CHB | LIMS3 | 110398688 | 18.3044 | 13.3838 | 1.123   |
| CHB | LIMS3 | 110403688 | 16.0341 | 11.6896 | 1.1267  |
| CHB | LIMS3 | 110408688 | 8.6903  | 11.5202 | -0.744  |



## 2\_TajimasD\_data

|     |       |           |         |         |         |
|-----|-------|-----------|---------|---------|---------|
| CHB | LIMS3 | 110413688 | 7.3352  | 10.5037 | -0.9084 |
| CHB | LIMS3 | 110418688 | 10.7428 | 9.9955  | 0.2244  |
| YRI | LIMS3 | 109403688 | 10.2462 | 11.4282 | -0.3121 |
| YRI | LIMS3 | 109408688 | 9.5071  | 12.6047 | -0.7457 |
| YRI | LIMS3 | 109413688 | 10.4508 | 12.9408 | -0.5847 |
| YRI | LIMS3 | 109418688 | 8.051   | 9.4115  | -0.4306 |
| YRI | LIMS3 | 109423688 | 7.1032  | 9.5795  | -0.771  |
| YRI | LIMS3 | 109428688 | 8.9073  | 11.7644 | -0.734  |
| YRI | LIMS3 | 109433688 | 10.032  | 13.1089 | -0.7137 |
| YRI | LIMS3 | 109438688 | 8.9362  | 11.5963 | -0.6927 |
| YRI | LIMS3 | 109443688 | 12.1735 | 13.9492 | -0.3883 |
| YRI | LIMS3 | 109448688 | 12.8588 | 15.6298 | -0.5438 |
| YRI | LIMS3 | 109453688 | 9.2939  | 12.1005 | -0.7022 |
| YRI | LIMS3 | 109458688 | 8.9131  | 10.924  | -0.5538 |
| YRI | LIMS3 | 109463688 | 8.0749  | 10.4199 | -0.6751 |
| YRI | LIMS3 | 109468688 | 8.1583  | 11.9324 | -0.9567 |
| YRI | LIMS3 | 109473688 | 9.9983  | 13.445  | -0.7806 |
| YRI | LIMS3 | 109478688 | 10.8117 | 13.445  | -0.5964 |
| YRI | LIMS3 | 109483688 | 7.2058  | 11.9324 | -1.1982 |
| YRI | LIMS3 | 109488688 | 10.9506 | 12.7727 | -0.4332 |
| YRI | LIMS3 | 109493688 | 16.7036 | 16.302  | 0.0757  |
| YRI | LIMS3 | 109498688 | 16.5098 | 16.134  | 0.0716  |
| YRI | LIMS3 | 109503688 | 16.0582 | 14.2853 | 0.3791  |
| YRI | LIMS3 | 109508688 | 13.7439 | 13.2769 | 0.107   |
| YRI | LIMS3 | 109513688 | 16.3573 | 15.2937 | 0.2131  |
| YRI | LIMS3 | 109518688 | 16.5395 | 16.134  | 0.0772  |
| YRI | LIMS3 | 109523688 | 11.6083 | 14.7895 | -0.6581 |
| YRI | LIMS3 | 109528688 | 8.3429  | 11.9324 | -0.9099 |
| YRI | LIMS3 | 109533688 | 9.6131  | 12.9408 | -0.7814 |
| YRI | LIMS3 | 109538688 | 11.9757 | 15.7978 | -0.7425 |
| YRI | LIMS3 | 109543688 | 10.0747 | 16.134  | -1.1537 |
| YRI | LIMS3 | 109548688 | 7.6984  | 15.9659 | -1.5899 |
| YRI | LIMS3 | 109553688 | 13.0488 | 18.6549 | -0.9287 |
| YRI | LIMS3 | 109558688 | 13.5402 | 16.134  | -0.4939 |
| YRI | LIMS3 | 109563688 | 7.6423  | 10.4199 | -0.7996 |
| YRI | LIMS3 | 109568688 | 7.2009  | 11.0921 | -1.0565 |
| YRI | LIMS3 | 109573688 | 10.2687 | 13.613  | -0.7485 |
| YRI | LIMS3 | 109578688 | 12.716  | 15.4617 | -0.5445 |
| YRI | LIMS3 | 109583688 | 11.0878 | 13.445  | -0.5338 |
| YRI | LIMS3 | 109588688 | 10.6443 | 13.613  | -0.6645 |
| YRI | LIMS3 | 109593688 | 15.5453 | 15.7978 | -0.0491 |
| YRI | LIMS3 | 109598688 | 16.126  | 15.4617 | 0.1317  |
| YRI | LIMS3 | 109603688 | 11.2913 | 13.613  | -0.5196 |
| YRI | LIMS3 | 109608688 | 9.2621  | 12.4366 | -0.7739 |
| YRI | LIMS3 | 109613688 | 9.6901  | 11.9324 | -0.5684 |
| YRI | LIMS3 | 109618688 | 7.3346  | 10.2518 | -0.8526 |
| YRI | LIMS3 | 109623688 | 6.2979  | 10.0837 | -1.1237 |
| YRI | LIMS3 | 109628688 | 10.1193 | 14.4534 | -0.9164 |
| YRI | LIMS3 | 109633688 | 12.5476 | 15.9659 | -0.6574 |

## 2\_TajimasD\_data

|     |       |           |         |         |         |
|-----|-------|-----------|---------|---------|---------|
| YRI | LIMS3 | 109638688 | 10.3389 | 13.9492 | -0.7896 |
| YRI | LIMS3 | 109643688 | 7.8825  | 15.1256 | -1.4667 |
| YRI | LIMS3 | 109648688 | 9.0241  | 15.9659 | -1.335  |
| YRI | LIMS3 | 109653688 | 9.2043  | 20.3355 | -1.6971 |
| YRI | LIMS3 | 109658688 | 11.9256 | 21.8481 | -1.4116 |
| YRI | LIMS3 | 109663688 | 11.3809 | 18.991  | -1.2393 |
| YRI | LIMS3 | 109668688 | 10.5806 | 19.6633 | -1.4304 |
| YRI | LIMS3 | 109673688 | 15.7119 | 19.9994 | -0.6643 |
| YRI | LIMS3 | 109678688 | 16.081  | 17.9827 | -0.3264 |
| YRI | LIMS3 | 109683688 | 11.9012 | 15.6298 | -0.7318 |
| YRI | LIMS3 | 109688688 | 10.9804 | 16.134  | -0.9812 |
| YRI | LIMS3 | 109693688 | 12.8007 | 17.4785 | -0.825  |
| YRI | LIMS3 | 109698688 | 11.3576 | 14.6214 | -0.6826 |
| YRI | LIMS3 | 109703688 | 10.5993 | 12.9408 | -0.5498 |
| YRI | LIMS3 | 109708688 | 10.9996 | 12.2685 | -0.3134 |
| YRI | LIMS3 | 109713688 | 7.6664  | 8.9073  | -0.4133 |
| YRI | LIMS3 | 109718688 | 5.5552  | 8.9073  | -1.1164 |
| YRI | LIMS3 | 109723688 | 4.0778  | 8.067   | -1.4557 |
| YRI | LIMS3 | 109728688 | 3.639   | 7.0586  | -1.4097 |
| YRI | LIMS3 | 109733688 | 5.9228  | 10.0837 | -1.235  |
| YRI | LIMS3 | 109738688 | 6.2703  | 10.5879 | -1.2245 |
| YRI | LIMS3 | 109743688 | 6.4891  | 9.5795  | -0.9621 |
| YRI | LIMS3 | 109748688 | 6.7286  | 10.5879 | -1.0945 |
| YRI | LIMS3 | 109753688 | 7.9027  | 9.5795  | -0.522  |
| YRI | LIMS3 | 109758688 | 10.0102 | 10.756  | -0.2084 |
| YRI | LIMS3 | 109763688 | 10.7966 | 12.4366 | -0.3998 |
| YRI | LIMS3 | 109768688 | 10.9688 | 13.7811 | -0.6222 |
| YRI | LIMS3 | 109773688 | 12.4671 | 14.7895 | -0.4804 |
| YRI | LIMS3 | 109778688 | 15.5252 | 15.6298 | -0.0205 |
| YRI | LIMS3 | 109783688 | 16.256  | 18.1507 | -0.3223 |
| YRI | LIMS3 | 109788688 | 11.8453 | 13.9492 | -0.4601 |
| YRI | LIMS3 | 109793688 | 9.1261  | 10.0837 | -0.2842 |
| YRI | LIMS3 | 109798688 | 10.0207 | 11.9324 | -0.4846 |
| YRI | LIMS3 | 109803688 | 14.9352 | 14.9575 | -0.0046 |
| YRI | LIMS3 | 109808688 | 15.2534 | 15.9659 | -0.137  |
| YRI | LIMS3 | 109813688 | 11.94   | 16.302  | -0.8223 |
| YRI | LIMS3 | 109818688 | 15.6142 | 17.6465 | -0.3551 |
| YRI | LIMS3 | 109823688 | 18.1763 | 17.1423 | 0.1858  |
| YRI | LIMS3 | 109828688 | 15.6856 | 15.6298 | 0.011   |
| YRI | LIMS3 | 109833688 | 14.2624 | 13.9492 | 0.0685  |
| YRI | LIMS3 | 109838688 | 15.4763 | 14.6214 | 0.1788  |
| YRI | LIMS3 | 109843688 | 12.6196 | 16.4701 | -0.7188 |
| YRI | LIMS3 | 109848688 | 8.7929  | 16.8062 | -1.4673 |
| YRI | LIMS3 | 109853688 | 8.7272  | 16.9743 | -1.4958 |
| YRI | LIMS3 | 109858688 | 10.9545 | 16.8062 | -1.0715 |
| YRI | LIMS3 | 109863688 | 11.6075 | 16.9743 | -0.9734 |
| YRI | LIMS3 | 109868688 | 10.2845 | 15.6298 | -1.0491 |
| YRI | LIMS3 | 109873688 | 12.2656 | 12.9408 | -0.1585 |
| YRI | LIMS3 | 109878688 | 12.828  | 13.1089 | -0.0652 |

## 2\_TajimasD\_data

|     |       |           |         |         |         |
|-----|-------|-----------|---------|---------|---------|
| YRI | LIMS3 | 109883688 | 10.3764 | 13.7811 | -0.7532 |
| YRI | LIMS3 | 109888688 | 10.6591 | 15.4617 | -0.9523 |
| YRI | LIMS3 | 109893688 | 11.4189 | 14.4534 | -0.6416 |
| YRI | LIMS3 | 109898688 | 9.7945  | 11.7644 | -0.5061 |
| YRI | LIMS3 | 109903688 | 7.8133  | 12.7727 | -1.179  |
| YRI | LIMS3 | 109908688 | 9.5131  | 15.2937 | -1.1583 |
| YRI | LIMS3 | 109913688 | 9.6739  | 15.2937 | -1.126  |
| YRI | LIMS3 | 109918688 | 20.5375 | 16.4701 | 0.7593  |
| YRI | LIMS3 | 109923688 | 30.9061 | 17.9827 | 2.2178  |
| YRI | LIMS3 | 109928688 | 49.5907 | 25.8816 | 2.8624  |
| YRI | LIMS3 | 109933688 | 46.562  | 26.2177 | 2.4256  |
| YRI | LIMS3 | 109938688 | 16.3681 | 17.3104 | -0.1677 |
| YRI | LIMS3 | 109943688 | 8.1026  | 13.1089 | -1.1613 |
| YRI | LIMS3 | 109948688 | 8.6455  | 12.4366 | -0.9243 |
| YRI | LIMS3 | 109953688 | 8.2242  | 13.7811 | -1.2294 |
| YRI | LIMS3 | 109958688 | 10.2441 | 13.445  | -0.7249 |
| YRI | LIMS3 | 109963688 | 13.3643 | 14.1172 | -0.1628 |
| YRI | LIMS3 | 109968688 | 10.8729 | 13.9492 | -0.6728 |
| YRI | LIMS3 | 109973688 | 10.4928 | 15.2937 | -0.962  |
| YRI | LIMS3 | 109978688 | 11.0256 | 17.1423 | -1.099  |
| YRI | LIMS3 | 109983688 | 13.3021 | 17.3104 | -0.7135 |
| YRI | LIMS3 | 109988688 | 15.1899 | 19.1591 | -0.6409 |
| YRI | LIMS3 | 109993688 | 13.3823 | 18.3188 | -0.8322 |
| YRI | LIMS3 | 109998688 | 19.2825 | 18.3188 | 0.1625  |
| YRI | LIMS3 | 110003688 | 25.6778 | 20.6717 | 0.7513  |
| YRI | LIMS3 | 110008688 | 17.4118 | 18.991  | -0.2572 |
| YRI | LIMS3 | 110013688 | 17.1399 | 19.4952 | -0.374  |
| YRI | LIMS3 | 110018688 | 21.7571 | 20.3355 | 0.2167  |
| YRI | LIMS3 | 110023688 | 21.228  | 20.5036 | 0.1096  |
| YRI | LIMS3 | 110028688 | 17.8583 | 17.9827 | -0.0213 |
| YRI | LIMS3 | 110033688 | 10.7088 | 15.2937 | -0.9187 |
| YRI | LIMS3 | 110038688 | 14.8808 | 18.991  | -0.6693 |
| YRI | LIMS3 | 110043688 | 18.0202 | 22.6884 | -0.6403 |
| YRI | LIMS3 | 110048688 | 13.9618 | 20.5036 | -0.9895 |
| YRI | LIMS3 | 110053688 | 12.4512 | 16.134  | -0.7012 |
| YRI | LIMS3 | 110058688 | 11.7359 | 14.9575 | -0.6593 |
| YRI | LIMS3 | 110063688 | 10.2298 | 14.6214 | -0.9184 |
| YRI | LIMS3 | 110068688 | 8.8489  | 13.9492 | -1.1154 |
| YRI | LIMS3 | 110073688 | 8.3069  | 13.2769 | -1.1391 |
| YRI | LIMS3 | 110078688 | 10.9008 | 15.2937 | -0.8802 |
| YRI | LIMS3 | 110083688 | 11.3647 | 15.7978 | -0.8612 |
| YRI | LIMS3 | 110088688 | 10.1988 | 14.7895 | -0.9497 |
| YRI | LIMS3 | 110093688 | 8.6067  | 13.613  | -1.1205 |
| YRI | LIMS3 | 110098688 | 6.5389  | 11.7644 | -1.3425 |
| YRI | LIMS3 | 110103688 | 9.6631  | 16.302  | -1.2516 |
| YRI | LIMS3 | 110108688 | 7.2763  | 11.4282 | -1.0961 |
| YRI | LIMS3 | 110113688 | 1.0744  | 1.1764  | -0.1824 |
| YRI | LIMS3 | 110118688 | 0       | 0       | 0       |
| YRI | LIMS3 | 110123688 | 0       | 0       | 0       |

## 2\_TajimasD\_data

|     |       |           |         |         |         |
|-----|-------|-----------|---------|---------|---------|
| YRI | LIMS3 | 110128688 | 0       | 0       | 0       |
| YRI | LIMS3 | 110133688 | 0       | 0       | 0       |
| YRI | LIMS3 | 110138688 | 0       | 0       | 0       |
| YRI | LIMS3 | 110143688 | 0       | 0       | 0       |
| YRI | LIMS3 | 110148688 | 0       | 0       | 0       |
| YRI | LIMS3 | 110153688 | 0       | 0       | 0       |
| YRI | LIMS3 | 110158688 | 0       | 0       | 0       |
| YRI | LIMS3 | 110163688 | 0       | 0       | 0       |
| YRI | LIMS3 | 110168688 | 0       | 0       | 0       |
| YRI | LIMS3 | 110173688 | 0       | 0       | 0       |
| YRI | LIMS3 | 110178688 | 0       | 0       | 0       |
| YRI | LIMS3 | 110183688 | 0       | 0       | 0       |
| YRI | LIMS3 | 110188688 | 0       | 0       | 0       |
| YRI | LIMS3 | 110193688 | 0       | 0       | 0       |
| YRI | LIMS3 | 110198688 | 0       | 0       | 0       |
| YRI | LIMS3 | 110203688 | 0       | 0       | 0       |
| YRI | LIMS3 | 110208688 | 0       | 0       | 0       |
| YRI | LIMS3 | 110213688 | 0       | 0       | 0       |
| YRI | LIMS3 | 110218688 | 0       | 0       | 0       |
| YRI | LIMS3 | 110223688 | 0       | 0       | 0       |
| YRI | LIMS3 | 110228688 | 0       | 0       | 0       |
| YRI | LIMS3 | 110233688 | 0       | 0       | 0       |
| YRI | LIMS3 | 110238688 | 0       | 0       | 0       |
| YRI | LIMS3 | 110243688 | 0       | 0       | 0       |
| YRI | LIMS3 | 110248688 | 8.8105  | 7.2267  | 0.6391  |
| YRI | LIMS3 | 110253688 | 24.6908 | 21.68   | 0.4315  |
| YRI | LIMS3 | 110258688 | 20.1877 | 22.8565 | -0.3635 |
| YRI | LIMS3 | 110263688 | 10.2133 | 17.8146 | -1.3163 |
| YRI | LIMS3 | 110268688 | 12.2439 | 15.9659 | -0.7158 |
| YRI | LIMS3 | 110273688 | 23.476  | 21.1758 | 0.3373  |
| YRI | LIMS3 | 110278688 | 33.2145 | 27.7303 | 0.6192  |
| YRI | LIMS3 | 110283688 | 27.4618 | 23.6968 | 0.4951  |
| YRI | LIMS3 | 110288688 | 16.7417 | 15.1256 | 0.3272  |
| YRI | LIMS3 | 110293688 | 9.2002  | 10.924  | -0.4748 |
| YRI | LIMS3 | 110298688 | 7.2365  | 11.7644 | -1.1632 |
| YRI | LIMS3 | 110303688 | 7.0103  | 10.924  | -1.0779 |
| YRI | LIMS3 | 110308688 | 6.5215  | 11.4282 | -1.2954 |
| YRI | LIMS3 | 110313688 | 7.8664  | 10.4199 | -0.7351 |
| YRI | LIMS3 | 110318688 | 10.1567 | 11.9324 | -0.4501 |
| YRI | LIMS3 | 110323688 | 10.2731 | 13.7811 | -0.7761 |
| YRI | LIMS3 | 110328688 | 11.9782 | 12.2685 | -0.0717 |
| YRI | LIMS3 | 110333688 | 14.8641 | 13.445  | 0.3214  |
| YRI | LIMS3 | 110338688 | 12.1812 | 13.1089 | -0.2152 |
| YRI | LIMS3 | 110343688 | 10.1115 | 12.1005 | -0.4976 |
| YRI | LIMS3 | 110348688 | 10.7275 | 12.6047 | -0.4519 |
| YRI | LIMS3 | 110353688 | 8.5496  | 11.0921 | -0.6903 |
| YRI | LIMS3 | 110358688 | 8.1983  | 10.756  | -0.7147 |
| YRI | LIMS3 | 110363688 | 9.0093  | 10.924  | -0.5273 |
| YRI | LIMS3 | 110368688 | 8.5221  | 11.2602 | -0.733  |

## 2\_TajimasD\_data

|     |       |           |         |         |         |
|-----|-------|-----------|---------|---------|---------|
| YRI | LIMS3 | 110373688 | 9.1018  | 10.756  | -0.4623 |
| YRI | LIMS3 | 110378688 | 10.1952 | 11.4282 | -0.3255 |
| YRI | LIMS3 | 110383688 | 11.5073 | 14.9575 | -0.7061 |
| YRI | LIMS3 | 110388688 | 13.2402 | 16.8062 | -0.653  |
| YRI | LIMS3 | 110393688 | 17.1629 | 18.4868 | -0.2212 |
| YRI | LIMS3 | 110398688 | 18.0754 | 19.1591 | -0.175  |
| YRI | LIMS3 | 110403688 | 13.6937 | 16.8062 | -0.5699 |
| YRI | LIMS3 | 110408688 | 10.2859 | 14.2853 | -0.8551 |
| YRI | LIMS3 | 110413688 | 10.4084 | 14.7895 | -0.9063 |
| YRI | LIMS3 | 110418688 | 11.2707 | 15.1256 | -0.7806 |
| CEU | LIMS3 | 109891341 | 8.6722  | 6.6519  | 0.8845  |
| CEU | LIMS3 | 109896341 | 8.7163  | 6.9931  | 0.721   |
| CEU | LIMS3 | 109901341 | 5.3414  | 5.458   | -0.061  |
| CEU | LIMS3 | 109906341 | 3.7001  | 5.1169  | -0.7842 |
| CEU | LIMS3 | 109911341 | 2.8194  | 5.458   | -1.3794 |
| CEU | LIMS3 | 109916341 | 11.3819 | 9.0398  | 0.7744  |
| CEU | LIMS3 | 109921341 | 20.3149 | 12.2805 | 1.9947  |
| CEU | LIMS3 | 109926341 | 26.496  | 14.4978 | 2.5455  |
| CEU | LIMS3 | 109931341 | 40.5459 | 22.0026 | 2.6365  |
| CEU | LIMS3 | 109936341 | 31.556  | 17.5679 | 2.4702  |
| CEU | LIMS3 | 109941341 | 9.1029  | 7.5047  | 0.6271  |
| CEU | LIMS3 | 109946341 | 9.7848  | 8.5281  | 0.4385  |
| CEU | LIMS3 | 109951341 | 11.5302 | 9.0398  | 0.8234  |
| CEU | LIMS3 | 109956341 | 8.2033  | 8.6987  | -0.1697 |
| CEU | LIMS3 | 109961341 | 10.0802 | 9.2104  | 0.2826  |
| CEU | LIMS3 | 109966341 | 8.3447  | 9.8926  | -0.4707 |
| CEU | LIMS3 | 109971341 | 5.9052  | 9.5515  | -1.1455 |
| CEU | LIMS3 | 109976341 | 5.6928  | 8.8692  | -1.0689 |
| CEU | LIMS3 | 109981341 | 6.3717  | 11.0866 | -1.2888 |
| CEU | LIMS3 | 109986341 | 9.3643  | 14.1567 | -1.04   |
| CEU | LIMS3 | 109991341 | 12.0674 | 16.0329 | -0.7643 |
| CEU | LIMS3 | 109996341 | 11.8015 | 14.6684 | -0.6015 |
| CEU | LIMS3 | 110001341 | 18.3119 | 12.6216 | 1.3767  |
| CEU | LIMS3 | 110006341 | 17.5356 | 10.2337 | 2.1512  |
| CEU | LIMS3 | 110011341 | 8.0289  | 7.1636  | 0.3542  |
| CEU | LIMS3 | 110016341 | 13.4373 | 9.7221  | 1.1481  |
| CEU | LIMS3 | 110021341 | 16.7261 | 13.3039 | 0.7877  |
| CEU | LIMS3 | 110026341 | 15.5327 | 13.4744 | 0.4681  |
| CEU | LIMS3 | 110031341 | 11.5056 | 10.5749 | 0.2659  |
| CEU | LIMS3 | 110036341 | 7.6614  | 9.3809  | -0.5493 |
| CEU | LIMS3 | 110041341 | 11.5877 | 10.916  | 0.1863  |
| CEU | LIMS3 | 110046341 | 11.2632 | 8.8692  | 0.8056  |
| CEU | LIMS3 | 110051341 | 6.7605  | 6.8225  | -0.0265 |
| CEU | LIMS3 | 110056341 | 5.8134  | 7.6753  | -0.7157 |
| CEU | LIMS3 | 110061341 | 4.6889  | 7.3342  | -1.0599 |
| CEU | LIMS3 | 110066341 | 3.672   | 6.3108  | -1.2115 |
| CEU | LIMS3 | 110071341 | 4.376   | 6.4814  | -0.9437 |
| CEU | LIMS3 | 110076341 | 5.8526  | 6.4814  | -0.2818 |
| CEU | LIMS3 | 110081341 | 6.2187  | 8.0164  | -0.664  |

## 2\_TajimasD\_data

|     |       |           |         |         |         |
|-----|-------|-----------|---------|---------|---------|
| CEU | LIMS3 | 110086341 | 4.8237  | 8.0164  | -1.1792 |
| CEU | LIMS3 | 110091341 | 5.4134  | 6.9931  | -0.661  |
| CEU | LIMS3 | 110096341 | 5.2213  | 6.6519  | -0.6263 |
| CEU | LIMS3 | 110101341 | 4.5228  | 6.4814  | -0.8779 |
| CEU | LIMS3 | 110106341 | 6.0796  | 7.1636  | -0.4437 |
| CEU | LIMS3 | 110111341 | 3.3894  | 3.5818  | -0.145  |
| CEU | LIMS3 | 110116341 | 0       | 0       | 0       |
| CEU | LIMS3 | 110121341 | 0       | 0       | 0       |
| CEU | LIMS3 | 110126341 | 0       | 0       | 0       |
| CEU | LIMS3 | 110131341 | 0       | 0       | 0       |
| CEU | LIMS3 | 110136341 | 0       | 0       | 0       |
| CEU | LIMS3 | 110141341 | 0       | 0       | 0       |
| CEU | LIMS3 | 110146341 | 0       | 0       | 0       |
| CEU | LIMS3 | 110151341 | 0       | 0       | 0       |
| CEU | LIMS3 | 110156341 | 0       | 0       | 0       |
| CEU | LIMS3 | 110161341 | 0       | 0       | 0       |
| CEU | LIMS3 | 110166341 | 0       | 0       | 0       |
| CEU | LIMS3 | 110171341 | 0       | 0       | 0       |
| CEU | LIMS3 | 110176341 | 0       | 0       | 0       |
| CEU | LIMS3 | 110181341 | 0       | 0       | 0       |
| CEU | LIMS3 | 110186341 | 0       | 0       | 0       |
| CEU | LIMS3 | 110191341 | 0       | 0       | 0       |
| CEU | LIMS3 | 110196341 | 0       | 0       | 0       |
| CEU | LIMS3 | 110201341 | 0       | 0       | 0       |
| CEU | LIMS3 | 110206341 | 0       | 0       | 0       |
| CEU | LIMS3 | 110211341 | 0       | 0       | 0       |
| CEU | LIMS3 | 110216341 | 0       | 0       | 0       |
| CEU | LIMS3 | 110221341 | 0       | 0       | 0       |
| CEU | LIMS3 | 110226341 | 0       | 0       | 0       |
| CEU | LIMS3 | 110231341 | 0       | 0       | 0       |
| CEU | LIMS3 | 110236341 | 0       | 0       | 0       |
| CEU | LIMS3 | 110241341 | 0       | 0       | 0       |
| CEU | LIMS3 | 110246341 | 0       | 0       | 0       |
| CEU | LIMS3 | 110251341 | 17.7613 | 10.0632 | 2.3038  |
| CEU | LIMS3 | 110256341 | 23.8404 | 15.5212 | 1.6539  |
| CEU | LIMS3 | 110261341 | 11.0328 | 10.2337 | 0.2354  |
| CEU | LIMS3 | 110266341 | 8.4867  | 8.8692  | -0.1287 |
| CEU | LIMS3 | 110271341 | 8.7965  | 9.7221  | -0.286  |
| CEU | LIMS3 | 110276341 | 9.0043  | 10.0632 | -0.3169 |
| CEU | LIMS3 | 110281341 | 7.4649  | 9.0398  | -0.5207 |
| CEU | LIMS3 | 110286341 | 6.4892  | 8.0164  | -0.5641 |
| CEU | LIMS3 | 110291341 | 6.43    | 6.3108  | 0.0547  |
| CEU | LIMS3 | 110296341 | 6.0427  | 7.6753  | -0.6275 |
| CEU | LIMS3 | 110301341 | 5.791   | 9.0398  | -1.0741 |
| CEU | LIMS3 | 110306341 | 7.3181  | 8.3576  | -0.3695 |
| CEU | LIMS3 | 110311341 | 6.5275  | 5.9697  | 0.2692  |
| CEU | LIMS3 | 110316341 | 6.4444  | 5.6286  | 0.415   |
| CEU | LIMS3 | 110321341 | 7.2134  | 7.3342  | -0.0484 |
| CEU | LIMS3 | 110326341 | 8.267   | 8.3576  | -0.0322 |

2\_TajimasD\_data

|     |       |           |         |         |         |
|-----|-------|-----------|---------|---------|---------|
| CEU | LIMS3 | 110331341 | 9.033   | 10.4043 | -0.3978 |
| CEU | LIMS3 | 110336341 | 7.1416  | 10.0632 | -0.8743 |
| CEU | LIMS3 | 110341341 | 6.3412  | 8.5281  | -0.763  |
| CEU | LIMS3 | 110346341 | 7.2773  | 8.187   | -0.3296 |
| CEU | LIMS3 | 110351341 | 8.4752  | 7.3342  | 0.4572  |
| CEU | LIMS3 | 110356341 | 7.9938  | 7.5047  | 0.1919  |
| CEU | LIMS3 | 110361341 | 6.5732  | 7.1636  | -0.2417 |
| CEU | LIMS3 | 110366341 | 8.1681  | 7.6753  | 0.1894  |
| CEU | LIMS3 | 110371341 | 10.174  | 8.187   | 0.7198  |
| CEU | LIMS3 | 110376341 | 7.5832  | 6.6519  | 0.4077  |
| CEU | LIMS3 | 110381341 | 8.255   | 8.3576  | -0.0365 |
| CEU | LIMS3 | 110386341 | 12.6007 | 11.0866 | 0.4139  |
| CEU | LIMS3 | 110391341 | 14.7223 | 12.2805 | 0.6062  |
| CEU | LIMS3 | 110396341 | 17.3208 | 12.4511 | 1.1934  |
| CEU | LIMS3 | 110401341 | 14.5504 | 11.9394 | 0.6657  |
| CEU | LIMS3 | 110406341 | 9.973   | 10.5749 | -0.172  |
| CEU | LIMS3 | 110411341 | 9.61    | 9.0398  | 0.1885  |
| CEU | LIMS3 | 110416341 | 9.6986  | 8.187   | 0.5476  |
| CEU | LIMS3 | 110421341 | 7.8108  | 7.6753  | 0.0521  |
| CEU | LIMS3 | 110426341 | 4.8393  | 5.9697  | -0.5455 |
| CEU | LIMS3 | 110431341 | 3.1501  | 5.2874  | -1.1492 |
| CEU | LIMS3 | 110436341 | 7.5998  | 10.0632 | -0.7372 |
| CEU | LIMS3 | 110441341 | 10.2092 | 11.0866 | -0.2398 |
| CEU | LIMS3 | 110446341 | 10.8547 | 10.7454 | 0.0308  |
| CEU | LIMS3 | 110451341 | 10.3575 | 10.4043 | -0.0136 |
| CEU | LIMS3 | 110456341 | 6.8965  | 8.5281  | -0.5693 |
| CEU | LIMS3 | 110461341 | 7.0173  | 9.5515  | -0.7961 |
| CEU | LIMS3 | 110466341 | 9.1051  | 10.0632 | -0.2867 |
| CEU | LIMS3 | 110471341 | 8.5209  | 7.6753  | 0.325   |
| CEU | LIMS3 | 110476341 | 5.3799  | 5.458   | -0.0408 |
| CEU | LIMS3 | 110481341 | 4.411   | 5.9697  | -0.7523 |
| CEU | LIMS3 | 110486341 | 4.4688  | 7.3342  | -1.1481 |
| CEU | LIMS3 | 110491341 | 5.2486  | 8.187   | -1.0645 |
| CEU | LIMS3 | 110496341 | 5.5775  | 5.9697  | -0.1893 |
| CEU | LIMS3 | 110501341 | 3.2273  | 3.4112  | -0.1444 |
| CEU | LIMS3 | 110506341 | 1.3036  | 1.7056  | -0.5506 |
| CEU | LIMS3 | 110511341 | 1.001   | 0.6822  | 0.8325  |
| CEU | LIMS3 | 110516341 | 0.5964  | 0.8528  | -0.5774 |
| CEU | LIMS3 | 110521341 | 1.4758  | 2.2173  | -0.8284 |
| CEU | LIMS3 | 110526341 | 0.9398  | 1.8762  | -1.1922 |
| CEU | LIMS3 | 110531341 | 0.1678  | 1.0234  | -1.7001 |
| CEU | LIMS3 | 110536341 | 0.1375  | 0.6822  | -1.4224 |
| CEU | LIMS3 | 110541341 | 0       | 0       | 0       |
| CEU | LIMS3 | 110546341 | 0       | 0       | 0       |
| CEU | LIMS3 | 110551341 | 0       | 0       | 0       |
| CEU | LIMS3 | 110556341 | 0       | 0       | 0       |
| CEU | LIMS3 | 110561341 | 0       | 0       | 0       |
| CEU | LIMS3 | 110566341 | 0       | 0       | 0       |
| CEU | LIMS3 | 110571341 | 0       | 0       | 0       |

## 2\_TajimasD\_data

|     |       |           |        |        |         |
|-----|-------|-----------|--------|--------|---------|
| CEU | LIMS3 | 110576341 | 0      | 0      | 0       |
| CEU | LIMS3 | 110581341 | 0      | 0      | 0       |
| CEU | LIMS3 | 110586341 | 0      | 0      | 0       |
| CEU | LIMS3 | 110591341 | 0      | 0      | 0       |
| CEU | LIMS3 | 110596341 | 0      | 0      | 0       |
| CEU | LIMS3 | 110601341 | 0      | 0      | 0       |
| CEU | LIMS3 | 110606341 | 0      | 0      | 0       |
| CEU | LIMS3 | 110611341 | 0      | 0      | 0       |
| CEU | LIMS3 | 110616341 | 0      | 0      | 0       |
| CEU | LIMS3 | 110621341 | 0      | 0      | 0       |
| CEU | LIMS3 | 110626341 | 0      | 0      | 0       |
| CEU | LIMS3 | 110631341 | 0      | 0      | 0       |
| CEU | LIMS3 | 110636341 | 0      | 0      | 0       |
| CEU | LIMS3 | 110641341 | 0      | 0      | 0       |
| CEU | LIMS3 | 110646341 | 0      | 0      | 0       |
| CEU | LIMS3 | 110651341 | 0      | 0      | 0       |
| CEU | LIMS3 | 110656341 | 0      | 0      | 0       |
| CEU | LIMS3 | 110661341 | 0      | 0      | 0       |
| CEU | LIMS3 | 110666341 | 0      | 0      | 0       |
| CEU | LIMS3 | 110671341 | 0      | 0      | 0       |
| CEU | LIMS3 | 110676341 | 0      | 0      | 0       |
| CEU | LIMS3 | 110681341 | 0      | 0      | 0       |
| CEU | LIMS3 | 110686341 | 0      | 0      | 0       |
| CEU | LIMS3 | 110691341 | 0      | 0      | 0       |
| CEU | LIMS3 | 110696341 | 0      | 0      | 0       |
| CEU | LIMS3 | 110701341 | 0.0785 | 0.3411 | -1.0527 |
| CEU | LIMS3 | 110706341 | 0.0785 | 0.3411 | -1.0527 |
| CEU | LIMS3 | 110711341 | 0      | 0      | 0       |
| CEU | LIMS3 | 110716341 | 0      | 0      | 0       |
| CEU | LIMS3 | 110721341 | 0.02   | 0.1706 | -0.8946 |
| CEU | LIMS3 | 110726341 | 0.02   | 0.1706 | -0.8946 |
| CEU | LIMS3 | 110731341 | 0.1187 | 0.5117 | -1.2326 |
| CEU | LIMS3 | 110736341 | 0.6578 | 1.1939 | -0.9553 |
| CEU | LIMS3 | 110741341 | 1.6658 | 1.8762 | -0.2679 |
| CEU | LIMS3 | 110746341 | 1.167  | 1.5351 | -0.5458 |
| CEU | LIMS3 | 110751341 | 0.544  | 0.5117 | 0.1013  |
| CEU | LIMS3 | 110756341 | 0.5541 | 0.8528 | -0.6727 |
| CEU | LIMS3 | 110761341 | 0.9423 | 1.8762 | -1.189  |
| CEU | LIMS3 | 110766341 | 1.2624 | 2.5584 | -1.291  |
| CEU | LIMS3 | 110771341 | 0.5075 | 2.2173 | -1.9102 |
| CEU | LIMS3 | 110776341 | 0.3513 | 1.0234 | -1.3355 |
| CEU | LIMS3 | 110781341 | 0.7234 | 1.3645 | -1.0372 |
| CEU | LIMS3 | 110786341 | 0.5867 | 1.3645 | -1.2583 |
| CEU | LIMS3 | 110791341 | 0.8487 | 0.8528 | -0.0092 |
| CEU | LIMS3 | 110796341 | 1.2319 | 1.3645 | -0.2145 |
| CEU | LIMS3 | 110801341 | 1.1354 | 1.8762 | -0.9432 |
| CEU | LIMS3 | 110806341 | 2.0792 | 2.729  | -0.6142 |
| CEU | LIMS3 | 110811341 | 1.4636 | 1.7056 | -0.3314 |
| CEU | LIMS3 | 110816341 | 0.1095 | 0.5117 | -1.2614 |



## 2\_TajimasD\_data

|     |       |           |         |         |         |
|-----|-------|-----------|---------|---------|---------|
| CEU | LIMS3 | 110821341 | 1.0091  | 2.0467  | -1.2346 |
| CEU | LIMS3 | 110826341 | 0.979   | 1.8762  | -1.1423 |
| CEU | LIMS3 | 110831341 | 0.1587  | 0.8528  | -1.5631 |
| CEU | LIMS3 | 110836341 | 0.1385  | 0.6822  | -1.4198 |
| CEU | LIMS3 | 110841341 | 0       | 0       | 0       |
| CEU | LIMS3 | 110846341 | 0.2132  | 0.8528  | -1.4404 |
| CEU | LIMS3 | 110851341 | 1.5906  | 4.2641  | -1.7355 |
| CEU | LIMS3 | 110856341 | 2.8351  | 8.3576  | -1.9631 |
| CEU | LIMS3 | 110861341 | 3.7984  | 8.0164  | -1.5579 |
| CEU | LIMS3 | 110866341 | 3.5362  | 4.7757  | -0.729  |
| CEU | LIMS3 | 110871341 | 3.7786  | 4.6052  | -0.5019 |
| CEU | LIMS3 | 110876341 | 5.3154  | 5.2874  | 0.0151  |
| CEU | LIMS3 | 110881341 | 5.5553  | 5.7991  | -0.1208 |
| CEU | LIMS3 | 110886341 | 6.1878  | 6.1402  | 0.0224  |
| CEU | LIMS3 | 110891341 | 7.1666  | 5.7991  | 0.6773  |
| CEU | LIMS3 | 110896341 | 7.6162  | 5.9697  | 0.7946  |
| CEU | LIMS3 | 110901341 | 6.5182  | 4.9463  | 0.8965  |
| CEU | LIMS3 | 110906341 | 6.4688  | 5.458   | 0.5284  |
| CEU | LIMS3 | 110911341 | 7.0981  | 6.1402  | 0.4508  |
| CEU | LIMS3 | 110916341 | 5.2643  | 4.0935  | 0.7873  |
| CEU | LIMS3 | 110921341 | 3.4558  | 3.0701  | 0.3308  |
| CEU | LIMS3 | 110926341 | 3.3709  | 3.7524  | -0.2764 |
| CEU | LIMS3 | 110931341 | 4.5321  | 4.4346  | 0.0612  |
| CEU | LIMS3 | 110936341 | 4.7906  | 4.9463  | -0.0888 |
| CEU | LIMS3 | 110941341 | 7.2653  | 5.9697  | 0.6253  |
| CEU | LIMS3 | 110946341 | 8.946   | 8.6987  | 0.0847  |
| CEU | LIMS3 | 110951341 | 6.7275  | 8.3576  | -0.5795 |
| CEU | LIMS3 | 110956341 | 5.7984  | 5.9697  | -0.0827 |
| CEU | LIMS3 | 110961341 | 4.5768  | 5.6286  | -0.535  |
| CEU | LIMS3 | 110966341 | 3.4475  | 6.1402  | -1.2671 |
| CHB | LIMS3 | 109891341 | 8.4129  | 8.979   | -0.1878 |
| CHB | LIMS3 | 109896341 | 7.3482  | 5.9295  | 0.6868  |
| CHB | LIMS3 | 109901341 | 4.9463  | 5.5907  | -0.3288 |
| CHB | LIMS3 | 109906341 | 4.5585  | 8.3013  | -1.3349 |
| CHB | LIMS3 | 109911341 | 4.1563  | 10.1649 | -1.7762 |
| CHB | LIMS3 | 109916341 | 10.0803 | 13.892  | -0.8397 |
| CHB | LIMS3 | 109921341 | 18.0653 | 15.4168 | 0.5284  |
| CHB | LIMS3 | 109926341 | 27.9514 | 16.2638 | 2.2158  |
| CHB | LIMS3 | 109931341 | 45.245  | 24.7346 | 2.5963  |
| CHB | LIMS3 | 109936341 | 32.7701 | 21.3463 | 1.6677  |
| CHB | LIMS3 | 109941341 | 7.1763  | 9.9955  | -0.8466 |
| CHB | LIMS3 | 109946341 | 9.4102  | 10.1649 | -0.2231 |
| CHB | LIMS3 | 109951341 | 9.91    | 10.6731 | -0.2155 |
| CHB | LIMS3 | 109956341 | 5.5802  | 9.3178  | -1.198  |
| CHB | LIMS3 | 109961341 | 5.5612  | 8.8096  | -1.0967 |
| CHB | LIMS3 | 109966341 | 4.4847  | 9.3178  | -1.5492 |
| CHB | LIMS3 | 109971341 | 2.8231  | 10.6731 | -2.2171 |
| CHB | LIMS3 | 109976341 | 3.0051  | 10.6731 | -2.1657 |
| CHB | LIMS3 | 109981341 | 3.3274  | 12.0285 | -2.1966 |

## 2\_TajimasD\_data

|     |       |           |         |         |         |
|-----|-------|-----------|---------|---------|---------|
| CHB | LIMS3 | 109986341 | 3.9962  | 15.7556 | -2.298  |
| CHB | LIMS3 | 109991341 | 6.6809  | 16.9415 | -1.8707 |
| CHB | LIMS3 | 109996341 | 8.23    | 15.0779 | -1.3955 |
| CHB | LIMS3 | 110001341 | 16.1116 | 14.9085 | 0.2478  |
| CHB | LIMS3 | 110006341 | 15.9364 | 14.2309 | 0.3672  |
| CHB | LIMS3 | 110011341 | 8.6591  | 12.3673 | -0.9119 |
| CHB | LIMS3 | 110016341 | 12.7465 | 13.7226 | -0.2176 |
| CHB | LIMS3 | 110021341 | 16.1086 | 15.7556 | 0.069   |
| CHB | LIMS3 | 110026341 | 17.4544 | 16.4333 | 0.1917  |
| CHB | LIMS3 | 110031341 | 12.5755 | 12.3673 | 0.0512  |
| CHB | LIMS3 | 110036341 | 8.1249  | 9.6567  | -0.475  |
| CHB | LIMS3 | 110041341 | 11.981  | 11.012  | 0.2658  |
| CHB | LIMS3 | 110046341 | 11.57   | 11.1814 | 0.1051  |
| CHB | LIMS3 | 110051341 | 6.9722  | 8.6402  | -0.5734 |
| CHB | LIMS3 | 110056341 | 5.4028  | 7.4543  | -0.8075 |
| CHB | LIMS3 | 110061341 | 4.1464  | 6.946   | -1.1752 |
| CHB | LIMS3 | 110066341 | 3.7737  | 5.2519  | -0.7972 |
| CHB | LIMS3 | 110071341 | 4.3328  | 5.4213  | -0.5708 |
| CHB | LIMS3 | 110076341 | 5.506   | 5.4213  | 0.0444  |
| CHB | LIMS3 | 110081341 | 5.7249  | 6.4378  | -0.3205 |
| CHB | LIMS3 | 110086341 | 4.3607  | 7.4543  | -1.2177 |
| CHB | LIMS3 | 110091341 | 4.9704  | 6.7766  | -0.7753 |
| CHB | LIMS3 | 110096341 | 4.5763  | 6.7766  | -0.9445 |
| CHB | LIMS3 | 110101341 | 5.5326  | 9.6567  | -1.2788 |
| CHB | LIMS3 | 110106341 | 7.5858  | 9.8261  | -0.6835 |
| CHB | LIMS3 | 110111341 | 3.6128  | 3.8965  | -0.1984 |
| CHB | LIMS3 | 110116341 | 0       | 0       | 0       |
| CHB | LIMS3 | 110121341 | 0       | 0       | 0       |
| CHB | LIMS3 | 110126341 | 0       | 0       | 0       |
| CHB | LIMS3 | 110131341 | 0       | 0       | 0       |
| CHB | LIMS3 | 110136341 | 0       | 0       | 0       |
| CHB | LIMS3 | 110141341 | 0       | 0       | 0       |
| CHB | LIMS3 | 110146341 | 0       | 0       | 0       |
| CHB | LIMS3 | 110151341 | 0       | 0       | 0       |
| CHB | LIMS3 | 110156341 | 0       | 0       | 0       |
| CHB | LIMS3 | 110161341 | 0       | 0       | 0       |
| CHB | LIMS3 | 110166341 | 0       | 0       | 0       |
| CHB | LIMS3 | 110171341 | 0       | 0       | 0       |
| CHB | LIMS3 | 110176341 | 0       | 0       | 0       |
| CHB | LIMS3 | 110181341 | 0       | 0       | 0       |
| CHB | LIMS3 | 110186341 | 0       | 0       | 0       |
| CHB | LIMS3 | 110191341 | 0       | 0       | 0       |
| CHB | LIMS3 | 110196341 | 0       | 0       | 0       |
| CHB | LIMS3 | 110201341 | 0       | 0       | 0       |
| CHB | LIMS3 | 110206341 | 0       | 0       | 0       |
| CHB | LIMS3 | 110211341 | 0       | 0       | 0       |
| CHB | LIMS3 | 110216341 | 0       | 0       | 0       |
| CHB | LIMS3 | 110221341 | 0       | 0       | 0       |
| CHB | LIMS3 | 110226341 | 0       | 0       | 0       |

## 2\_TajimasD\_data

|     |       |           |         |         |         |
|-----|-------|-----------|---------|---------|---------|
| CHB | LIMS3 | 110231341 | 0       | 0       | 0       |
| CHB | LIMS3 | 110236341 | 0       | 0       | 0       |
| CHB | LIMS3 | 110241341 | 0       | 0       | 0       |
| CHB | LIMS3 | 110246341 | 0       | 0       | 0       |
| CHB | LIMS3 | 110251341 | 22.9143 | 12.8755 | 2.3766  |
| CHB | LIMS3 | 110256341 | 30.6874 | 20.8381 | 1.4717  |
| CHB | LIMS3 | 110261341 | 11.6238 | 14.2309 | -0.5613 |
| CHB | LIMS3 | 110266341 | 7.3082  | 11.6896 | -1.1362 |
| CHB | LIMS3 | 110271341 | 12.4314 | 12.7061 | -0.0659 |
| CHB | LIMS3 | 110276341 | 17.1366 | 19.8216 | -0.421  |
| CHB | LIMS3 | 110281341 | 13.3222 | 17.958  | -0.7993 |
| CHB | LIMS3 | 110286341 | 7.7855  | 8.8096  | -0.3458 |
| CHB | LIMS3 | 110291341 | 5.1875  | 6.4378  | -0.5622 |
| CHB | LIMS3 | 110296341 | 6.1336  | 7.2848  | -0.4627 |
| CHB | LIMS3 | 110301341 | 7.2787  | 8.8096  | -0.5169 |
| CHB | LIMS3 | 110306341 | 7.0202  | 8.3013  | -0.4569 |
| CHB | LIMS3 | 110311341 | 5.5922  | 6.7766  | -0.5084 |
| CHB | LIMS3 | 110316341 | 6.4569  | 7.2848  | -0.3328 |
| CHB | LIMS3 | 110321341 | 8.2105  | 8.4708  | -0.0911 |
| CHB | LIMS3 | 110326341 | 9.6297  | 9.3178  | 0.1     |
| CHB | LIMS3 | 110331341 | 11.0689 | 10.1649 | 0.2672  |
| CHB | LIMS3 | 110336341 | 8.5974  | 9.4872  | -0.2805 |
| CHB | LIMS3 | 110341341 | 6.7013  | 9.1484  | -0.7978 |
| CHB | LIMS3 | 110346341 | 7.6857  | 9.6567  | -0.6112 |
| CHB | LIMS3 | 110351341 | 8.0527  | 9.4872  | -0.4522 |
| CHB | LIMS3 | 110356341 | 7.2271  | 7.7931  | -0.2139 |
| CHB | LIMS3 | 110361341 | 7.2294  | 6.7766  | 0.1944  |
| CHB | LIMS3 | 110366341 | 8.5818  | 8.979   | -0.1318 |
| CHB | LIMS3 | 110371341 | 8.5425  | 11.012  | -0.6774 |
| CHB | LIMS3 | 110376341 | 7.0714  | 9.6567  | -0.8016 |
| CHB | LIMS3 | 110381341 | 8.5679  | 9.3178  | -0.2404 |
| CHB | LIMS3 | 110386341 | 12.8528 | 11.3508 | 0.4004  |
| CHB | LIMS3 | 110391341 | 15.8471 | 12.7061 | 0.753   |
| CHB | LIMS3 | 110396341 | 18.5736 | 13.045  | 1.2928  |
| CHB | LIMS3 | 110401341 | 17.6834 | 12.7061 | 1.1932  |
| CHB | LIMS3 | 110406341 | 11.8835 | 12.8755 | -0.2348 |
| CHB | LIMS3 | 110411341 | 8.7864  | 11.8591 | -0.7861 |
| CHB | LIMS3 | 110416341 | 9.0541  | 9.3178  | -0.0845 |
| CHB | LIMS3 | 110421341 | 9.6988  | 10.8426 | -0.3183 |
| CHB | LIMS3 | 110426341 | 7.1862  | 9.6567  | -0.766  |
| CHB | LIMS3 | 110431341 | 4.8999  | 6.6072  | -0.7499 |
| CHB | LIMS3 | 110436341 | 10.1209 | 10.6731 | -0.156  |
| CHB | LIMS3 | 110441341 | 12.1847 | 12.8755 | -0.1635 |
| CHB | LIMS3 | 110446341 | 10.0705 | 12.5367 | -0.5988 |
| CHB | LIMS3 | 110451341 | 8.6249  | 11.1814 | -0.6913 |
| CHB | LIMS3 | 110456341 | 6.5007  | 9.3178  | -0.903  |
| CHB | LIMS3 | 110461341 | 6.2932  | 9.6567  | -1.0429 |
| CHB | LIMS3 | 110466341 | 7.6286  | 8.8096  | -0.3987 |
| CHB | LIMS3 | 110471341 | 7.2915  | 6.7766  | 0.221   |

## 2\_TajimasD\_data

|     |       |           |        |        |         |
|-----|-------|-----------|--------|--------|---------|
| CHB | LIMS3 | 110476341 | 5.202  | 5.7601 | -0.2773 |
| CHB | LIMS3 | 110481341 | 4.0109 | 6.4378 | -1.0912 |
| CHB | LIMS3 | 110486341 | 3.7691 | 7.4543 | -1.4506 |
| CHB | LIMS3 | 110491341 | 4.7687 | 8.1319 | -1.2224 |
| CHB | LIMS3 | 110496341 | 5.8181 | 7.2848 | -0.5896 |
| CHB | LIMS3 | 110501341 | 3.9685 | 4.913  | -0.5403 |
| CHB | LIMS3 | 110506341 | 1.5941 | 2.5412 | -0.9457 |
| CHB | LIMS3 | 110511341 | 0.8228 | 0.8471 | -0.0548 |
| CHB | LIMS3 | 110516341 | 0.5254 | 0.5082 | 0.054   |
| CHB | LIMS3 | 110521341 | 1.5869 | 2.2024 | -0.6892 |
| CHB | LIMS3 | 110526341 | 1.2631 | 2.2024 | -1.0518 |
| CHB | LIMS3 | 110531341 | 0.4575 | 0.5082 | -0.1592 |
| CHB | LIMS3 | 110536341 | 0.2844 | 0.1694 | 0.6833  |
| CHB | LIMS3 | 110541341 | 0      | 0      | 0       |
| CHB | LIMS3 | 110546341 | 0      | 0      | 0       |
| CHB | LIMS3 | 110551341 | 0      | 0      | 0       |
| CHB | LIMS3 | 110556341 | 0      | 0      | 0       |
| CHB | LIMS3 | 110561341 | 0      | 0      | 0       |
| CHB | LIMS3 | 110566341 | 0      | 0      | 0       |
| CHB | LIMS3 | 110571341 | 0      | 0      | 0       |
| CHB | LIMS3 | 110576341 | 0      | 0      | 0       |
| CHB | LIMS3 | 110581341 | 0      | 0      | 0       |
| CHB | LIMS3 | 110586341 | 0      | 0      | 0       |
| CHB | LIMS3 | 110591341 | 0      | 0      | 0       |
| CHB | LIMS3 | 110596341 | 0      | 0      | 0       |
| CHB | LIMS3 | 110601341 | 0      | 0      | 0       |
| CHB | LIMS3 | 110606341 | 0      | 0      | 0       |
| CHB | LIMS3 | 110611341 | 0      | 0      | 0       |
| CHB | LIMS3 | 110616341 | 0      | 0      | 0       |
| CHB | LIMS3 | 110621341 | 0      | 0      | 0       |
| CHB | LIMS3 | 110626341 | 0      | 0      | 0       |
| CHB | LIMS3 | 110631341 | 0      | 0      | 0       |
| CHB | LIMS3 | 110636341 | 0      | 0      | 0       |
| CHB | LIMS3 | 110641341 | 0      | 0      | 0       |
| CHB | LIMS3 | 110646341 | 0      | 0      | 0       |
| CHB | LIMS3 | 110651341 | 0      | 0      | 0       |
| CHB | LIMS3 | 110656341 | 0      | 0      | 0       |
| CHB | LIMS3 | 110661341 | 0      | 0      | 0       |
| CHB | LIMS3 | 110666341 | 0      | 0      | 0       |
| CHB | LIMS3 | 110671341 | 0.0097 | 0.1694 | -0.949  |
| CHB | LIMS3 | 110676341 | 0.0097 | 0.1694 | -0.949  |
| CHB | LIMS3 | 110681341 | 0      | 0      | 0       |
| CHB | LIMS3 | 110686341 | 0      | 0      | 0       |
| CHB | LIMS3 | 110691341 | 0      | 0      | 0       |
| CHB | LIMS3 | 110696341 | 0      | 0      | 0       |
| CHB | LIMS3 | 110701341 | 0.1314 | 0.3388 | -0.8319 |
| CHB | LIMS3 | 110706341 | 0.1314 | 0.3388 | -0.8319 |
| CHB | LIMS3 | 110711341 | 0      | 0      | 0       |
| CHB | LIMS3 | 110716341 | 0      | 0      | 0       |

## 2\_TajimasD\_data

|     |       |           |        |        |         |
|-----|-------|-----------|--------|--------|---------|
| CHB | LIMS3 | 110721341 | 0.0194 | 0.1694 | -0.8913 |
| CHB | LIMS3 | 110726341 | 0.0194 | 0.1694 | -0.8913 |
| CHB | LIMS3 | 110731341 | 0.0666 | 0.3388 | -1.0919 |
| CHB | LIMS3 | 110736341 | 0.6469 | 1.6942 | -1.4373 |
| CHB | LIMS3 | 110741341 | 2.0402 | 3.3883 | -1.0617 |
| CHB | LIMS3 | 110746341 | 1.5641 | 2.5412 | -0.9757 |
| CHB | LIMS3 | 110751341 | 0.6183 | 0.8471 | -0.5159 |
| CHB | LIMS3 | 110756341 | 0.601  | 0.8471 | -0.555  |
| CHB | LIMS3 | 110761341 | 0.9343 | 1.8636 | -1.1857 |
| CHB | LIMS3 | 110766341 | 1.3476 | 3.8965 | -1.7828 |
| CHB | LIMS3 | 110771341 | 0.885  | 3.5577 | -2.0199 |
| CHB | LIMS3 | 110776341 | 0.7599 | 1.1859 | -0.7604 |
| CHB | LIMS3 | 110781341 | 1.4755 | 1.6942 | -0.3001 |
| CHB | LIMS3 | 110786341 | 1.1856 | 1.8636 | -0.865  |
| CHB | LIMS3 | 110791341 | 1.2781 | 1.6942 | -0.571  |
| CHB | LIMS3 | 110796341 | 1.8125 | 2.5412 | -0.7277 |
| CHB | LIMS3 | 110801341 | 1.23   | 2.2024 | -1.0888 |
| CHB | LIMS3 | 110806341 | 2.1296 | 3.0495 | -0.7911 |
| CHB | LIMS3 | 110811341 | 1.5852 | 2.5412 | -0.9546 |
| CHB | LIMS3 | 110816341 | 0.0758 | 0.6777 | -1.5735 |
| CHB | LIMS3 | 110821341 | 1.205  | 1.3553 | -0.2436 |
| CHB | LIMS3 | 110826341 | 1.2717 | 1.5247 | -0.3759 |
| CHB | LIMS3 | 110831341 | 0.4247 | 0.8471 | -0.9525 |
| CHB | LIMS3 | 110836341 | 0.3581 | 0.6777 | -0.8355 |
| CHB | LIMS3 | 110841341 | 0.0097 | 0.1694 | -0.949  |
| CHB | LIMS3 | 110846341 | 0.3097 | 1.0165 | -1.4066 |
| CHB | LIMS3 | 110851341 | 2.2696 | 5.5907 | -1.6945 |
| CHB | LIMS3 | 110856341 | 4.2465 | 9.6567 | -1.6776 |
| CHB | LIMS3 | 110861341 | 5.1614 | 9.1484 | -1.2999 |
| CHB | LIMS3 | 110866341 | 4.1114 | 7.4543 | -1.3159 |
| CHB | LIMS3 | 110871341 | 4.2267 | 7.1154 | -1.1863 |
| CHB | LIMS3 | 110876341 | 5.703  | 7.4543 | -0.6894 |
| CHB | LIMS3 | 110881341 | 5.4704 | 6.7766 | -0.5607 |
| CHB | LIMS3 | 110886341 | 6.4022 | 5.5907 | 0.414   |
| CHB | LIMS3 | 110891341 | 7.835  | 6.6072 | 0.5393  |
| CHB | LIMS3 | 110896341 | 8.5464 | 7.6237 | 0.3558  |
| CHB | LIMS3 | 110901341 | 7.6857 | 6.7766 | 0.3902  |
| CHB | LIMS3 | 110906341 | 7.7658 | 7.2848 | 0.1933  |
| CHB | LIMS3 | 110911341 | 7.9722 | 6.7766 | 0.5132  |
| CHB | LIMS3 | 110916341 | 5.8306 | 6.0989 | -0.1266 |
| CHB | LIMS3 | 110921341 | 4.3185 | 6.7766 | -1.0552 |
| CHB | LIMS3 | 110926341 | 3.7388 | 6.6072 | -1.2598 |
| CHB | LIMS3 | 110931341 | 4.7657 | 5.9295 | -0.5634 |
| CHB | LIMS3 | 110936341 | 5.7023 | 6.6072 | -0.3974 |
| CHB | LIMS3 | 110941341 | 8.3813 | 7.7931 | 0.2223  |
| CHB | LIMS3 | 110946341 | 9.724  | 8.1319 | 0.5787  |
| CHB | LIMS3 | 110951341 | 7.2298 | 7.2848 | -0.0221 |
| CHB | LIMS3 | 110956341 | 6.2985 | 5.9295 | 0.1786  |
| CHB | LIMS3 | 110961341 | 5.2104 | 4.7436 | 0.2754  |

## 2\_TajimasD\_data

|     |       |           |         |         |         |
|-----|-------|-----------|---------|---------|---------|
| CHB | LIMS3 | 110966341 | 3.9543  | 4.2354  | -0.183  |
| YRI | LIMS3 | 109891341 | 11.3651 | 15.7978 | -0.8611 |
| YRI | LIMS3 | 109896341 | 9.9899  | 12.2685 | -0.5627 |
| YRI | LIMS3 | 109901341 | 7.747   | 12.1005 | -1.0892 |
| YRI | LIMS3 | 109906341 | 7.0589  | 12.2685 | -1.2865 |
| YRI | LIMS3 | 109911341 | 8.1945  | 13.445  | -1.1891 |
| YRI | LIMS3 | 109916341 | 16.9667 | 17.6465 | -0.1188 |
| YRI | LIMS3 | 109921341 | 26.6802 | 18.3188 | 1.4096  |
| YRI | LIMS3 | 109926341 | 34.4798 | 19.1591 | 2.4739  |
| YRI | LIMS3 | 109931341 | 51.2419 | 27.3941 | 2.7245  |
| YRI | LIMS3 | 109936341 | 37.7446 | 24.7051 | 1.647   |
| YRI | LIMS3 | 109941341 | 9.2922  | 13.7811 | -0.9931 |
| YRI | LIMS3 | 109946341 | 8.0244  | 12.9408 | -1.1544 |
| YRI | LIMS3 | 109951341 | 7.9734  | 13.7811 | -1.2848 |
| YRI | LIMS3 | 109956341 | 9.3058  | 13.2769 | -0.9101 |
| YRI | LIMS3 | 109961341 | 13.6728 | 14.9575 | -0.2629 |
| YRI | LIMS3 | 109966341 | 12.3294 | 14.6214 | -0.4793 |
| YRI | LIMS3 | 109971341 | 9.9211  | 14.1172 | -0.9073 |
| YRI | LIMS3 | 109976341 | 8.4529  | 13.7811 | -1.1788 |
| YRI | LIMS3 | 109981341 | 10.756  | 15.6298 | -0.9565 |
| YRI | LIMS3 | 109986341 | 16.0604 | 20.3355 | -0.6518 |
| YRI | LIMS3 | 109991341 | 15.6603 | 20.1675 | -0.6927 |
| YRI | LIMS3 | 109996341 | 16.7431 | 18.6549 | -0.3167 |
| YRI | LIMS3 | 110001341 | 25.275  | 20.1675 | 0.785   |
| YRI | LIMS3 | 110006341 | 20.1069 | 19.3272 | 0.1248  |
| YRI | LIMS3 | 110011341 | 14.3366 | 18.1507 | -0.6487 |
| YRI | LIMS3 | 110016341 | 19.671  | 19.6633 | 0.0012  |
| YRI | LIMS3 | 110021341 | 19.7018 | 18.991  | 0.1158  |
| YRI | LIMS3 | 110026341 | 21.1038 | 19.3272 | 0.2845  |
| YRI | LIMS3 | 110031341 | 15.037  | 17.4785 | -0.4306 |
| YRI | LIMS3 | 110036341 | 10.8708 | 17.1423 | -1.1268 |
| YRI | LIMS3 | 110041341 | 17.2536 | 21.512  | -0.615  |
| YRI | LIMS3 | 110046341 | 16.4764 | 21.3439 | -0.7083 |
| YRI | LIMS3 | 110051341 | 12.0013 | 17.3104 | -0.945  |
| YRI | LIMS3 | 110056341 | 12.0872 | 15.2937 | -0.6425 |
| YRI | LIMS3 | 110061341 | 11.1429 | 15.4617 | -0.8564 |
| YRI | LIMS3 | 110066341 | 9.8282  | 14.9575 | -1.0498 |
| YRI | LIMS3 | 110071341 | 9.0708  | 13.613  | -1.0166 |
| YRI | LIMS3 | 110076341 | 9.7158  | 13.2769 | -0.8162 |
| YRI | LIMS3 | 110081341 | 12.3844 | 16.8062 | -0.8097 |
| YRI | LIMS3 | 110086341 | 10.331  | 16.4701 | -1.1461 |
| YRI | LIMS3 | 110091341 | 8.886   | 13.2769 | -1.0063 |
| YRI | LIMS3 | 110096341 | 8.3101  | 11.5963 | -0.8557 |
| YRI | LIMS3 | 110101341 | 7.5617  | 13.445  | -1.3324 |
| YRI | LIMS3 | 110106341 | 8.6338  | 14.9575 | -1.2942 |
| YRI | LIMS3 | 110111341 | 4.0029  | 6.3864  | -1.0757 |
| YRI | LIMS3 | 110116341 | 0       | 0       | 0       |
| YRI | LIMS3 | 110121341 | 0       | 0       | 0       |
| YRI | LIMS3 | 110126341 | 0       | 0       | 0       |

## 2\_TajimasD\_data

|     |       |           |         |         |         |
|-----|-------|-----------|---------|---------|---------|
| YRI | LIMS3 | 110131341 | 0       | 0       | 0       |
| YRI | LIMS3 | 110136341 | 0       | 0       | 0       |
| YRI | LIMS3 | 110141341 | 0       | 0       | 0       |
| YRI | LIMS3 | 110146341 | 0       | 0       | 0       |
| YRI | LIMS3 | 110151341 | 0       | 0       | 0       |
| YRI | LIMS3 | 110156341 | 0       | 0       | 0       |
| YRI | LIMS3 | 110161341 | 0       | 0       | 0       |
| YRI | LIMS3 | 110166341 | 0       | 0       | 0       |
| YRI | LIMS3 | 110171341 | 0       | 0       | 0       |
| YRI | LIMS3 | 110176341 | 0       | 0       | 0       |
| YRI | LIMS3 | 110181341 | 0       | 0       | 0       |
| YRI | LIMS3 | 110186341 | 0       | 0       | 0       |
| YRI | LIMS3 | 110191341 | 0       | 0       | 0       |
| YRI | LIMS3 | 110196341 | 0       | 0       | 0       |
| YRI | LIMS3 | 110201341 | 0       | 0       | 0       |
| YRI | LIMS3 | 110206341 | 0       | 0       | 0       |
| YRI | LIMS3 | 110211341 | 0       | 0       | 0       |
| YRI | LIMS3 | 110216341 | 0       | 0       | 0       |
| YRI | LIMS3 | 110221341 | 0       | 0       | 0       |
| YRI | LIMS3 | 110226341 | 0       | 0       | 0       |
| YRI | LIMS3 | 110231341 | 0       | 0       | 0       |
| YRI | LIMS3 | 110236341 | 0       | 0       | 0       |
| YRI | LIMS3 | 110241341 | 0       | 0       | 0       |
| YRI | LIMS3 | 110246341 | 0       | 0       | 0       |
| YRI | LIMS3 | 110251341 | 19.0588 | 14.6214 | 0.928   |
| YRI | LIMS3 | 110256341 | 26.1911 | 26.3858 | -0.0231 |
| YRI | LIMS3 | 110261341 | 13.4369 | 19.8313 | -0.9988 |
| YRI | LIMS3 | 110266341 | 11.0395 | 15.7978 | -0.9244 |
| YRI | LIMS3 | 110271341 | 15.0776 | 17.1423 | -0.371  |
| YRI | LIMS3 | 110276341 | 29.068  | 25.3774 | 0.4542  |
| YRI | LIMS3 | 110281341 | 36.9836 | 29.9151 | 0.7412  |
| YRI | LIMS3 | 110286341 | 23.7234 | 19.9994 | 0.577   |
| YRI | LIMS3 | 110291341 | 8.8321  | 11.2602 | -0.65   |
| YRI | LIMS3 | 110296341 | 6.8226  | 10.756  | -1.0992 |
| YRI | LIMS3 | 110301341 | 6.9467  | 10.756  | -1.0645 |
| YRI | LIMS3 | 110306341 | 7.188   | 11.7644 | -1.1757 |
| YRI | LIMS3 | 110311341 | 6.7563  | 10.5879 | -1.0866 |
| YRI | LIMS3 | 110316341 | 8.6678  | 9.9157  | -0.3762 |
| YRI | LIMS3 | 110321341 | 10.1432 | 12.7727 | -0.6251 |
| YRI | LIMS3 | 110326341 | 10.5368 | 13.613  | -0.6885 |
| YRI | LIMS3 | 110331341 | 12.8747 | 13.1089 | -0.0543 |
| YRI | LIMS3 | 110336341 | 14.0391 | 13.1089 | 0.2158  |
| YRI | LIMS3 | 110341341 | 11.3823 | 12.4366 | -0.257  |
| YRI | LIMS3 | 110346341 | 10.113  | 12.2685 | -0.5323 |
| YRI | LIMS3 | 110351341 | 10.4647 | 12.2685 | -0.4454 |
| YRI | LIMS3 | 110356341 | 8.9474  | 11.2602 | -0.6191 |
| YRI | LIMS3 | 110361341 | 7.9452  | 10.5879 | -0.7495 |
| YRI | LIMS3 | 110366341 | 8.3969  | 10.2518 | -0.5421 |
| YRI | LIMS3 | 110371341 | 10.5286 | 11.2602 | -0.1959 |

## 2\_TajimasD\_data

|     |       |           |         |         |         |
|-----|-------|-----------|---------|---------|---------|
| YRI | LIMS3 | 110376341 | 9.8691  | 12.4366 | -0.626  |
| YRI | LIMS3 | 110381341 | 10.483  | 13.2769 | -0.6403 |
| YRI | LIMS3 | 110386341 | 11.915  | 15.7978 | -0.7543 |
| YRI | LIMS3 | 110391341 | 13.6449 | 17.6465 | -0.6993 |
| YRI | LIMS3 | 110396341 | 18.8211 | 18.3188 | 0.0847  |
| YRI | LIMS3 | 110401341 | 17.5643 | 18.1507 | -0.0997 |
| YRI | LIMS3 | 110406341 | 11.5555 | 16.4701 | -0.9175 |
| YRI | LIMS3 | 110411341 | 10.0834 | 14.7895 | -0.9736 |
| YRI | LIMS3 | 110416341 | 10.7313 | 13.613  | -0.645  |
| YRI | LIMS3 | 110421341 | 10.0297 | 13.613  | -0.802  |
| YRI | LIMS3 | 110426341 | 7.4663  | 12.2685 | -1.1859 |
| YRI | LIMS3 | 110431341 | 6.0066  | 11.9324 | -1.5022 |
| YRI | LIMS3 | 110436341 | 11.5669 | 16.302  | -0.8927 |
| YRI | LIMS3 | 110441341 | 13.0087 | 19.1591 | -0.9931 |
| YRI | LIMS3 | 110446341 | 13.1308 | 20.3355 | -1.0985 |
| YRI | LIMS3 | 110451341 | 13.0714 | 15.6298 | -0.5021 |
| YRI | LIMS3 | 110456341 | 8.5346  | 11.2602 | -0.7296 |
| YRI | LIMS3 | 110461341 | 9.2737  | 12.7727 | -0.8318 |
| YRI | LIMS3 | 110466341 | 11.0409 | 12.2685 | -0.3032 |
| YRI | LIMS3 | 110471341 | 7.5304  | 9.2434  | -0.5513 |
| YRI | LIMS3 | 110476341 | 3.8244  | 6.0502  | -1.0546 |
| YRI | LIMS3 | 110481341 | 4.9463  | 7.0586  | -0.8708 |
| YRI | LIMS3 | 110486341 | 5.8124  | 7.8989  | -0.7762 |
| YRI | LIMS3 | 110491341 | 5.5568  | 7.5628  | -0.7766 |
| YRI | LIMS3 | 110496341 | 5.4916  | 7.3947  | -0.752  |
| YRI | LIMS3 | 110501341 | 3.6267  | 5.0419  | -0.7885 |
| YRI | LIMS3 | 110506341 | 1.4785  | 2.3529  | -0.9256 |
| YRI | LIMS3 | 110511341 | 1.1019  | 1.6806  | -0.7961 |
| YRI | LIMS3 | 110516341 | 0.8392  | 1.1764  | -0.6031 |
| YRI | LIMS3 | 110521341 | 2.0927  | 1.6806  | 0.5669  |
| YRI | LIMS3 | 110526341 | 1.8885  | 1.8487  | 0.0509  |
| YRI | LIMS3 | 110531341 | 0.2948  | 1.0084  | -1.4227 |
| YRI | LIMS3 | 110536341 | 0.0461  | 0.5042  | -1.4397 |
| YRI | LIMS3 | 110541341 | 0       | 0       | 0       |
| YRI | LIMS3 | 110546341 | 0       | 0       | 0       |
| YRI | LIMS3 | 110551341 | 0       | 0       | 0       |
| YRI | LIMS3 | 110556341 | 0       | 0       | 0       |
| YRI | LIMS3 | 110561341 | 0       | 0       | 0       |
| YRI | LIMS3 | 110566341 | 0       | 0       | 0       |
| YRI | LIMS3 | 110571341 | 0       | 0       | 0       |
| YRI | LIMS3 | 110576341 | 0       | 0       | 0       |
| YRI | LIMS3 | 110581341 | 0       | 0       | 0       |
| YRI | LIMS3 | 110586341 | 0       | 0       | 0       |
| YRI | LIMS3 | 110591341 | 0       | 0       | 0       |
| YRI | LIMS3 | 110596341 | 0       | 0       | 0       |
| YRI | LIMS3 | 110601341 | 0       | 0       | 0       |
| YRI | LIMS3 | 110606341 | 0       | 0       | 0       |
| YRI | LIMS3 | 110611341 | 0       | 0       | 0       |
| YRI | LIMS3 | 110616341 | 0       | 0       | 0       |



## 2\_TajimasD\_data

|     |       |           |         |         |         |
|-----|-------|-----------|---------|---------|---------|
| YRI | LIMS3 | 110621341 | 0       | 0       | 0       |
| YRI | LIMS3 | 110626341 | 0       | 0       | 0       |
| YRI | LIMS3 | 110631341 | 0       | 0       | 0       |
| YRI | LIMS3 | 110636341 | 0       | 0       | 0       |
| YRI | LIMS3 | 110641341 | 0       | 0       | 0       |
| YRI | LIMS3 | 110646341 | 0       | 0       | 0       |
| YRI | LIMS3 | 110651341 | 0       | 0       | 0       |
| YRI | LIMS3 | 110656341 | 0       | 0       | 0       |
| YRI | LIMS3 | 110661341 | 0       | 0       | 0       |
| YRI | LIMS3 | 110666341 | 0       | 0       | 0       |
| YRI | LIMS3 | 110671341 | 0.1057  | 0.1681  | -0.3709 |
| YRI | LIMS3 | 110676341 | 0.1057  | 0.1681  | -0.3709 |
| YRI | LIMS3 | 110681341 | 0.0545  | 0.3361  | -1.1305 |
| YRI | LIMS3 | 110686341 | 0.0545  | 0.3361  | -1.1305 |
| YRI | LIMS3 | 110691341 | 0       | 0       | 0       |
| YRI | LIMS3 | 110696341 | 0.0278  | 0.3361  | -1.2377 |
| YRI | LIMS3 | 110701341 | 0.694   | 0.6722  | 0.0571  |
| YRI | LIMS3 | 110706341 | 0.6662  | 0.3361  | 1.3252  |
| YRI | LIMS3 | 110711341 | 0       | 0       | 0       |
| YRI | LIMS3 | 110716341 | 0.1181  | 0.6722  | -1.4506 |
| YRI | LIMS3 | 110721341 | 0.3551  | 1.0084  | -1.3025 |
| YRI | LIMS3 | 110726341 | 0.2463  | 0.5042  | -0.8105 |
| YRI | LIMS3 | 110731341 | 0.5965  | 0.6722  | -0.1982 |
| YRI | LIMS3 | 110736341 | 1.8551  | 2.0167  | -0.1932 |
| YRI | LIMS3 | 110741341 | 3.8467  | 3.6974  | 0.1088  |
| YRI | LIMS3 | 110746341 | 2.9262  | 2.5209  | 0.4059  |
| YRI | LIMS3 | 110751341 | 0.9068  | 0.8403  | 0.1502  |
| YRI | LIMS3 | 110756341 | 1.1758  | 1.3445  | -0.274  |
| YRI | LIMS3 | 110761341 | 2.3984  | 3.0251  | -0.5406 |
| YRI | LIMS3 | 110766341 | 3.6121  | 5.5461  | -0.9904 |
| YRI | LIMS3 | 110771341 | 3.1657  | 4.8738  | -0.9805 |
| YRI | LIMS3 | 110776341 | 1.9096  | 2.3529  | -0.4693 |
| YRI | LIMS3 | 110781341 | 2.7044  | 3.5293  | -0.6254 |
| YRI | LIMS3 | 110786341 | 2.1934  | 3.0251  | -0.7175 |
| YRI | LIMS3 | 110791341 | 1.862   | 2.689   | -0.7859 |
| YRI | LIMS3 | 110796341 | 3.1469  | 4.3696  | -0.772  |
| YRI | LIMS3 | 110801341 | 2.3616  | 3.6974  | -0.9736 |
| YRI | LIMS3 | 110806341 | 2.947   | 5.0419  | -1.1672 |
| YRI | LIMS3 | 110811341 | 2.2928  | 5.2099  | -1.579  |
| YRI | LIMS3 | 110816341 | 0.4054  | 2.1848  | -1.9979 |
| YRI | LIMS3 | 110821341 | 1.3157  | 3.0251  | -1.4746 |
| YRI | LIMS3 | 110826341 | 1.7675  | 3.1932  | -1.1758 |
| YRI | LIMS3 | 110831341 | 1.7408  | 2.0167  | -0.3299 |
| YRI | LIMS3 | 110836341 | 1.4048  | 2.1848  | -0.8758 |
| YRI | LIMS3 | 110841341 | 0.1618  | 0.6722  | -1.3362 |
| YRI | LIMS3 | 110846341 | 1.0588  | 0.6722  | 1.0121  |
| YRI | LIMS3 | 110851341 | 5.132   | 5.0419  | 0.0502  |
| YRI | LIMS3 | 110856341 | 11.0042 | 11.0921 | -0.0239 |
| YRI | LIMS3 | 110861341 | 12.299  | 12.1005 | 0.0497  |

## 2\_TajimasD\_data

|     |       |           |         |         |         |
|-----|-------|-----------|---------|---------|---------|
| YRI | LIMS3 | 110866341 | 6.7551  | 8.7392  | -0.6726 |
| YRI | LIMS3 | 110871341 | 6.6124  | 10.5879 | -1.1274 |
| YRI | LIMS3 | 110876341 | 9.3148  | 13.7811 | -0.9881 |
| YRI | LIMS3 | 110881341 | 7.2867  | 9.9157  | -0.7926 |
| YRI | LIMS3 | 110886341 | 7.0178  | 8.9073  | -0.6293 |
| YRI | LIMS3 | 110891341 | 9.953   | 12.7727 | -0.6703 |
| YRI | LIMS3 | 110896341 | 11.249  | 12.7727 | -0.3622 |
| YRI | LIMS3 | 110901341 | 9.1351  | 10.0837 | -0.2816 |
| YRI | LIMS3 | 110906341 | 9.6257  | 10.2518 | -0.183  |
| YRI | LIMS3 | 110911341 | 10.8602 | 12.2685 | -0.3478 |
| YRI | LIMS3 | 110916341 | 8.8383  | 11.7644 | -0.7517 |
| YRI | LIMS3 | 110921341 | 6.4794  | 10.2518 | -1.1026 |
| YRI | LIMS3 | 110926341 | 6.5152  | 10.2518 | -1.0921 |
| YRI | LIMS3 | 110931341 | 8.0057  | 10.2518 | -0.6565 |
| YRI | LIMS3 | 110936341 | 8.924   | 10.5879 | -0.4719 |
| YRI | LIMS3 | 110941341 | 10.8617 | 12.4366 | -0.384  |
| YRI | LIMS3 | 110946341 | 12.3746 | 14.7895 | -0.4996 |
| YRI | LIMS3 | 110951341 | 11.4308 | 14.7895 | -0.6948 |
| YRI | LIMS3 | 110956341 | 9.2942  | 12.7727 | -0.827  |
| YRI | LIMS3 | 110961341 | 7.0343  | 9.0754  | -0.6681 |
| YRI | LIMS3 | 110966341 | 7.5157  | 8.067   | -0.2012 |
| CEU | MUC12 | 100474565 | 8.7386  | 8.3576  | 0.1354  |
| CEU | MUC12 | 100479565 | 7.5333  | 7.6753  | -0.0546 |
| CEU | MUC12 | 100484565 | 6.9666  | 7.3342  | -0.1473 |
| CEU | MUC12 | 100489565 | 6.8959  | 7.3342  | -0.1756 |
| CEU | MUC12 | 100494565 | 10.4778 | 8.0164  | 0.9091  |
| CEU | MUC12 | 100499565 | 12.9303 | 8.6987  | 1.4497  |
| CEU | MUC12 | 100504565 | 14.5211 | 9.7221  | 1.483   |
| CEU | MUC12 | 100509565 | 11.9713 | 9.5515  | 0.7602  |
| CEU | MUC12 | 100514565 | 6.1379  | 7.1636  | -0.4199 |
| CEU | MUC12 | 100519565 | 6.8747  | 8.187   | -0.4754 |
| CEU | MUC12 | 100524565 | 9.4323  | 11.4277 | -0.5301 |
| CEU | MUC12 | 100529565 | 11.7621 | 12.2805 | -0.1287 |
| CEU | MUC12 | 100534565 | 14.1002 | 13.1333 | 0.2253  |
| CEU | MUC12 | 100539565 | 12.5148 | 11.4277 | 0.2888  |
| CEU | MUC12 | 100544565 | 11.218  | 10.5749 | 0.1837  |
| CEU | MUC12 | 100549565 | 25.691  | 22.8554 | 0.3886  |
| CEU | MUC12 | 100554565 | 20.2393 | 18.0796 | 0.371   |
| CEU | MUC12 | 100559565 | 0.8821  | 1.3645  | -0.7804 |
| CEU | MUC12 | 100564565 | 0       | 0       | 0       |
| CEU | MUC12 | 100569565 | 0       | 0       | 0       |
| CEU | MUC12 | 100574565 | 0       | 0       | 0       |
| CEU | MUC12 | 100579565 | 0       | 0       | 0       |
| CEU | MUC12 | 100584565 | 0       | 0       | 0       |
| CEU | MUC12 | 100589565 | 0       | 0       | 0       |
| CEU | MUC12 | 100594565 | 0       | 0       | 0       |
| CEU | MUC12 | 100599565 | 0       | 0       | 0       |
| CEU | MUC12 | 100604565 | 6.4168  | 6.9931  | -0.2411 |
| CEU | MUC12 | 100609565 | 12.2538 | 12.7922 | -0.1286 |

## 2\_TajimasD\_data

|     |       |           |         |         |         |
|-----|-------|-----------|---------|---------|---------|
| CEU | MUC12 | 100614565 | 14.9874 | 12.4511 | 0.6216  |
| CEU | MUC12 | 100619565 | 15.7188 | 11.4277 | 1.1401  |
| CEU | MUC12 | 100624565 | 11.9344 | 8.5281  | 1.1885  |
| CEU | MUC12 | 100629565 | 11.4143 | 9.8926  | 0.4627  |
| CEU | MUC12 | 100634565 | 23.0858 | 20.6381 | 0.3702  |
| CEU | MUC12 | 100639565 | 18.5269 | 15.8623 | 0.5189  |
| CEU | MUC12 | 100644565 | 14.811  | 9.5515  | 1.6523  |
| CEU | MUC12 | 100649565 | 16.9907 | 11.5982 | 1.4129  |
| CEU | MUC12 | 100654565 | 5.9971  | 5.1169  | 0.4872  |
| CEU | MUC12 | 100659565 | 5.0944  | 4.9463  | 0.0845  |
| CEU | MUC12 | 100664565 | 5.4444  | 6.9931  | -0.648  |
| CEU | MUC12 | 100669565 | 5.3962  | 8.187   | -1.011  |
| CEU | MUC12 | 100674565 | 7.4559  | 12.1099 | -1.1708 |
| CEU | MUC12 | 100679565 | 8.19    | 15.3506 | -1.4387 |
| CEU | MUC12 | 100684565 | 3.9023  | 10.7454 | -1.9261 |
| CEU | MUC12 | 100689565 | 4.7112  | 8.187   | -1.2592 |
| CEU | MUC12 | 100694565 | 7.9033  | 9.8926  | -0.6049 |
| CEU | MUC12 | 100699565 | 9.9959  | 9.7221  | 0.0846  |
| CEU | MUC12 | 100704565 | 15.3362 | 10.916  | 1.2259  |
| CEU | MUC12 | 100709565 | 16.7879 | 13.3039 | 0.802   |
| CEU | MUC12 | 100714565 | 17.0297 | 14.4978 | 0.5371  |
| CEU | MUC12 | 100719565 | 16.5928 | 14.4978 | 0.4445  |
| CEU | MUC12 | 100724565 | 11.4703 | 11.5982 | -0.0335 |
| CEU | MUC12 | 100729565 | 7.4661  | 9.0398  | -0.5203 |
| CEU | MUC12 | 100734565 | 8.2338  | 11.7688 | -0.9136 |
| CEU | MUC12 | 100739565 | 9.4993  | 11.2571 | -0.4737 |
| CEU | MUC12 | 100744565 | 9.0876  | 9.7221  | -0.1961 |
| CEU | MUC12 | 100749565 | 8.7161  | 10.0632 | -0.4031 |
| CEU | MUC12 | 100754565 | 14.5366 | 12.6216 | 0.4633  |
| CEU | MUC12 | 100759565 | 15.657  | 13.645  | 0.4521  |
| CEU | MUC12 | 100764565 | 11.0499 | 10.0632 | 0.2953  |
| CEU | MUC12 | 100769565 | 10.5088 | 10.0632 | 0.1334  |
| CEU | MUC12 | 100774565 | 12.2425 | 11.0866 | 0.316   |
| CEU | MUC12 | 100779565 | 13.7616 | 10.4043 | 0.9739  |
| CEU | MUC12 | 100784565 | 13.3286 | 9.8926  | 1.0448  |
| CEU | MUC12 | 100789565 | 13.0577 | 10.0632 | 0.8961  |
| CEU | MUC12 | 100794565 | 12.4261 | 10.5749 | 0.5289  |
| CEU | MUC12 | 100799565 | 15.6155 | 11.4277 | 1.1126  |
| CEU | MUC12 | 100804565 | 11.6366 | 8.8692  | 0.9312  |
| CEU | MUC12 | 100809565 | 6.3894  | 6.8225  | -0.1853 |
| CEU | MUC12 | 100814565 | 10.9015 | 11.2571 | -0.0958 |
| CEU | MUC12 | 100819565 | 9.9287  | 11.7688 | -0.4755 |
| CEU | MUC12 | 100824565 | 7.2127  | 10.0632 | -0.853  |
| CEU | MUC12 | 100829565 | 7.3791  | 10.2337 | -0.841  |
| CEU | MUC12 | 100834565 | 7.0544  | 9.5515  | -0.7845 |
| CEU | MUC12 | 100839565 | 7.0649  | 8.6987  | -0.5597 |
| CEU | MUC12 | 100844565 | 7.5962  | 10.4043 | -0.8146 |
| CEU | MUC12 | 100849565 | 7.1138  | 10.7454 | -1.0222 |
| CEU | MUC12 | 100854565 | 4.4978  | 8.187   | -1.3365 |

## 2\_TajimasD\_data

|     |       |           |         |         |         |
|-----|-------|-----------|---------|---------|---------|
| CEU | MUC12 | 100859565 | 6.6456  | 8.3576  | -0.6086 |
| CEU | MUC12 | 100864565 | 6.6054  | 7.3342  | -0.292  |
| CEU | MUC12 | 100869565 | 3.7095  | 6.4814  | -1.2424 |
| CEU | MUC12 | 100874565 | 4.3067  | 6.9931  | -1.124  |
| CEU | MUC12 | 100879565 | 5.1177  | 7.3342  | -0.8881 |
| CEU | MUC12 | 100884565 | 4.9779  | 7.6753  | -1.0368 |
| CEU | MUC12 | 100889565 | 5.8031  | 9.2104  | -1.1072 |
| CEU | MUC12 | 100894565 | 10.126  | 13.4744 | -0.7615 |
| CEU | MUC12 | 100899565 | 8.9421  | 16.8857 | -1.457  |
| CEU | MUC12 | 100904565 | 5.5865  | 16.5446 | -2.0496 |
| CEU | MUC12 | 100909565 | 5.5009  | 16.8857 | -2.0882 |
| CEU | MUC12 | 100914565 | 5.9491  | 13.9861 | -1.7643 |
| CEU | MUC12 | 100919565 | 9.214   | 10.0632 | -0.2541 |
| CEU | MUC12 | 100924565 | 10.6555 | 10.0632 | 0.1773  |
| CEU | MUC12 | 100929565 | 15.1159 | 15.5212 | -0.0806 |
| CEU | MUC12 | 100934565 | 16.0196 | 16.374  | -0.0669 |
| CEU | MUC12 | 100939565 | 11.0577 | 10.916  | 0.0393  |
| CEU | MUC12 | 100944565 | 9.651   | 8.6987  | 0.3263  |
| CEU | MUC12 | 100949565 | 12.8932 | 9.8926  | 0.9124  |
| CEU | MUC12 | 100954565 | 13.5053 | 11.0866 | 0.6611  |
| CEU | MUC12 | 100959565 | 12.7151 | 11.9394 | 0.1978  |
| CEU | MUC12 | 100964565 | 13.9592 | 12.9627 | 0.2351  |
| CEU | MUC12 | 100969565 | 11.8627 | 10.4043 | 0.4231  |
| CEU | MUC12 | 100974565 | 13.5523 | 10.7454 | 0.7901  |
| CEU | MUC12 | 100979565 | 17.8581 | 12.9627 | 1.1549  |
| CEU | MUC12 | 100984565 | 15.3425 | 12.4511 | 0.7086  |
| CEU | MUC12 | 100989565 | 14.8986 | 13.645  | 0.2817  |
| CEU | MUC12 | 100994565 | 23.0076 | 16.374  | 1.2531  |
| CEU | MUC12 | 100999565 | 23.7899 | 13.4744 | 2.346   |
| CEU | MUC12 | 101004565 | 37.6246 | 17.0562 | 3.7366  |
| CEU | MUC12 | 101009565 | 55.153  | 24.2199 | 4.0077  |
| CEU | MUC12 | 101014565 | 42.7114 | 19.6147 | 3.6689  |
| CEU | MUC12 | 101019565 | 18.9751 | 14.8389 | 0.8583  |
| CEU | MUC12 | 101024565 | 10.7246 | 16.7151 | -1.1095 |
| CEU | MUC12 | 101029565 | 13.4811 | 18.4207 | -0.8335 |
| CEU | MUC12 | 101034565 | 10.4517 | 15.0095 | -0.9355 |
| CEU | MUC12 | 101039565 | 9.7932  | 11.2571 | -0.3945 |
| CEU | MUC12 | 101044565 | 14.5784 | 13.3039 | 0.2934  |
| CEU | MUC12 | 101049565 | 13.1024 | 12.9627 | 0.033   |
| CEU | MUC12 | 101054565 | 11.9038 | 11.7688 | 0.0349  |
| CEU | MUC12 | 101059565 | 13.9804 | 12.4511 | 0.3748  |
| CEU | MUC12 | 101064565 | 13.6772 | 11.7688 | 0.4932  |
| CEU | MUC12 | 101069565 | 11.8027 | 11.2571 | 0.147   |
| CEU | MUC12 | 101074565 | 11.9002 | 11.0866 | 0.2224  |
| CEU | MUC12 | 101079565 | 13.712  | 12.9627 | 0.1768  |
| CEU | MUC12 | 101084565 | 13.8973 | 12.7922 | 0.264   |
| CEU | MUC12 | 101089565 | 11.4131 | 10.5749 | 0.2395  |
| CEU | MUC12 | 101094565 | 15.4556 | 13.645  | 0.4069  |
| CEU | MUC12 | 101099565 | 31.9834 | 19.7852 | 1.9216  |

## 2\_TajimasD\_data

|     |       |           |         |         |         |
|-----|-------|-----------|---------|---------|---------|
| CEU | MUC12 | 101104565 | 39.0298 | 20.2969 | 2.8793  |
| CEU | MUC12 | 101109565 | 24.7005 | 14.4978 | 2.1645  |
| CEU | MUC12 | 101114565 | 14.4743 | 11.7688 | 0.6992  |
| CEU | MUC12 | 101119565 | 16.6889 | 13.8156 | 0.6381  |
| CEU | MUC12 | 101124565 | 19.4564 | 13.645  | 1.306   |
| CEU | MUC12 | 101129565 | 21.3078 | 14.6684 | 1.393   |
| CEU | MUC12 | 101134565 | 16.9843 | 14.4978 | 0.5275  |
| CEU | MUC12 | 101139565 | 13.5675 | 14.3272 | -0.163  |
| CEU | MUC12 | 101144565 | 11.0194 | 14.6684 | -0.7656 |
| CEU | MUC12 | 101149565 | 10.8    | 16.0329 | -1.0086 |
| CEU | MUC12 | 101154565 | 17.6855 | 18.7619 | -0.1785 |
| CEU | MUC12 | 101159565 | 21.0875 | 18.9324 | 0.3542  |
| CEU | MUC12 | 101164565 | 16.4164 | 17.2268 | -0.1458 |
| CEU | MUC12 | 101169565 | 13.9992 | 15.6917 | -0.333  |
| CEU | MUC12 | 101174565 | 13.7166 | 15.6917 | -0.3886 |
| CEU | MUC12 | 101179565 | 11.8241 | 14.4978 | -0.5672 |
| CEU | MUC12 | 101184565 | 12.4322 | 12.6216 | -0.0458 |
| CEU | MUC12 | 101189565 | 17.4395 | 13.3039 | 0.9519  |
| CEU | MUC12 | 101194565 | 15.9821 | 13.1333 | 0.6638  |
| CEU | MUC12 | 101199565 | 16.3859 | 14.1567 | 0.4838  |
| CEU | MUC12 | 101204565 | 18.1171 | 14.8389 | 0.6803  |
| CEU | MUC12 | 101209565 | 9.9454  | 9.7221  | 0.069   |
| CEU | MUC12 | 101214565 | 7.0957  | 8.0164  | -0.3401 |
| CEU | MUC12 | 101219565 | 7.5912  | 7.3342  | 0.103   |
| CEU | MUC12 | 101224565 | 10.5253 | 7.8459  | 1.0094  |
| CEU | MUC12 | 101229565 | 11.9988 | 9.0398  | 0.9783  |
| CEU | MUC12 | 101234565 | 12.0276 | 9.3809  | 0.8455  |
| CEU | MUC12 | 101239565 | 11.3688 | 8.6987  | 0.9148  |
| CEU | MUC12 | 101244565 | 13.0167 | 9.2104  | 1.2368  |
| CEU | MUC12 | 101249565 | 15.8452 | 10.5749 | 1.5058  |
| CEU | MUC12 | 101254565 | 12.4454 | 9.2104  | 1.0512  |
| CEU | MUC12 | 101259565 | 9.4097  | 9.2104  | 0.0648  |
| CEU | MUC12 | 101264565 | 8.5502  | 8.6987  | -0.0509 |
| CEU | MUC12 | 101269565 | 12.0431 | 10.7454 | 0.3653  |
| CEU | MUC12 | 101274565 | 14.4857 | 13.3039 | 0.272   |
| CEU | MUC12 | 101279565 | 15.1892 | 12.7922 | 0.5726  |
| CEU | MUC12 | 101284565 | 16.2175 | 12.1099 | 1.0334  |
| CEU | MUC12 | 101289565 | 9.334   | 6.8225  | 1.0747  |
| CEU | MUC12 | 101294565 | 2.7215  | 2.2173  | 0.5633  |
| CEU | MUC12 | 101299565 | 2.2855  | 1.7056  | 0.7942  |
| CEU | MUC12 | 101304565 | 2.2659  | 1.7056  | 0.7674  |
| CEU | MUC12 | 101309565 | 1.8707  | 1.8762  | -0.007  |
| CEU | MUC12 | 101314565 | 0.6302  | 0.8528  | -0.5013 |
| CEU | MUC12 | 101319565 | 0.0101  | 0.1706  | -0.9534 |
| CEU | MUC12 | 101324565 | 0.7904  | 1.1939  | -0.719  |
| CEU | MUC12 | 101329565 | 6.3861  | 7.3342  | -0.3799 |
| CEU | MUC12 | 101334565 | 11.7464 | 11.4277 | 0.0847  |
| CEU | MUC12 | 101339565 | 12.5108 | 11.2571 | 0.3378  |
| CEU | MUC12 | 101344565 | 16.7025 | 15.5212 | 0.2349  |

## 2\_TajimasD\_data

|     |       |           |         |         |         |
|-----|-------|-----------|---------|---------|---------|
| CEU | MUC12 | 101349565 | 18.5758 | 15.3506 | 0.648   |
| CEU | MUC12 | 101354565 | 15.8821 | 11.5982 | 1.1224  |
| CEU | MUC12 | 101359565 | 12.3535 | 10.7454 | 0.4526  |
| CEU | MUC12 | 101364565 | 11.1746 | 10.5749 | 0.1713  |
| CEU | MUC12 | 101369565 | 13.4799 | 10.916  | 0.7111  |
| CEU | MUC12 | 101374565 | 13.7017 | 10.5749 | 0.8934  |
| CEU | MUC12 | 101379565 | 13.8553 | 10.7454 | 0.8753  |
| CEU | MUC12 | 101384565 | 12.5331 | 10.5749 | 0.5595  |
| CEU | MUC12 | 101389565 | 11.0651 | 10.7454 | 0.09    |
| CEU | MUC12 | 101394565 | 7.8662  | 8.6987  | -0.2852 |
| CEU | MUC12 | 101399565 | 7.4449  | 6.8225  | 0.2663  |
| CEU | MUC12 | 101404565 | 11.6698 | 7.8459  | 1.4405  |
| CEU | MUC12 | 101409565 | 15.8928 | 9.2104  | 2.1714  |
| CEU | MUC12 | 101414565 | 13.5871 | 8.8692  | 1.5876  |
| CEU | MUC12 | 101419565 | 9.168   | 8.187   | 0.3554  |
| CEU | MUC12 | 101424565 | 10.1381 | 9.5515  | 0.1843  |
| CEU | MUC12 | 101429565 | 11.7155 | 10.7454 | 0.2731  |
| CEU | MUC12 | 101434565 | 17.3898 | 11.7688 | 1.4527  |
| CEU | MUC12 | 101439565 | 17.598  | 11.0866 | 1.7799  |
| CEU | MUC12 | 101444565 | 13.2653 | 10.4043 | 0.83    |
| CEU | MUC12 | 101449565 | 9.665   | 8.5281  | 0.3967  |
| CEU | MUC12 | 101454565 | 5.0334  | 5.6286  | -0.3028 |
| CEU | MUC12 | 101459565 | 3.0016  | 3.9229  | -0.6426 |
| CEU | MUC12 | 101464565 | 4.221   | 5.6286  | -0.716  |
| CEU | MUC12 | 101469565 | 7.1647  | 7.6753  | -0.1963 |
| CEU | MUC12 | 101474565 | 7.3337  | 8.187   | -0.3091 |
| CEU | MUC12 | 101479565 | 6.6682  | 8.3576  | -0.6005 |
| CEU | MUC12 | 101484565 | 4.8991  | 6.3108  | -0.6481 |
| CEU | MUC12 | 101489565 | 3.7289  | 6.3108  | -1.1854 |
| CEU | MUC12 | 101494565 | 7.375   | 8.6987  | -0.4535 |
| CEU | MUC12 | 101499565 | 6.4884  | 7.3342  | -0.3389 |
| CEU | MUC12 | 101504565 | 5.4684  | 6.1402  | -0.3161 |
| CEU | MUC12 | 101509565 | 7.9594  | 7.1636  | 0.3258  |
| CHB | MUC12 | 100474565 | 6.9859  | 10.5037 | -1.0085 |
| CHB | MUC12 | 100479565 | 5.4234  | 9.3178  | -1.2483 |
| CHB | MUC12 | 100484565 | 4.28    | 9.8261  | -1.6921 |
| CHB | MUC12 | 100489565 | 4.0242  | 9.6567  | -1.7465 |
| CHB | MUC12 | 100494565 | 6.7605  | 9.9955  | -0.9714 |
| CHB | MUC12 | 100499565 | 9.1121  | 11.5202 | -0.6331 |
| CHB | MUC12 | 100504565 | 10.2397 | 11.1814 | -0.2546 |
| CHB | MUC12 | 100509565 | 9.3853  | 11.012  | -0.4462 |
| CHB | MUC12 | 100514565 | 6.0434  | 10.1649 | -1.2184 |
| CHB | MUC12 | 100519565 | 7.193   | 10.8426 | -1.0157 |
| CHB | MUC12 | 100524565 | 10.9806 | 13.045  | -0.4827 |
| CHB | MUC12 | 100529565 | 12.4367 | 12.3673 | 0.0171  |
| CHB | MUC12 | 100534565 | 12.869  | 12.8755 | -0.0015 |
| CHB | MUC12 | 100539565 | 9.7531  | 13.2144 | -0.7995 |
| CHB | MUC12 | 100544565 | 7.3223  | 12.3673 | -1.2407 |
| CHB | MUC12 | 100549565 | 26.2095 | 25.2428 | 0.12    |

## 2\_TajimasD\_data

|     |       |           |         |         |         |
|-----|-------|-----------|---------|---------|---------|
| CHB | MUC12 | 100554565 | 22.9243 | 21.3463 | 0.2304  |
| CHB | MUC12 | 100559565 | 0.9282  | 2.3718  | -1.5238 |
| CHB | MUC12 | 100564565 | 0       | 0       | 0       |
| CHB | MUC12 | 100569565 | 0       | 0       | 0       |
| CHB | MUC12 | 100574565 | 0       | 0       | 0       |
| CHB | MUC12 | 100579565 | 0       | 0       | 0       |
| CHB | MUC12 | 100584565 | 0       | 0       | 0       |
| CHB | MUC12 | 100589565 | 0       | 0       | 0       |
| CHB | MUC12 | 100594565 | 0       | 0       | 0       |
| CHB | MUC12 | 100599565 | 0       | 0       | 0       |
| CHB | MUC12 | 100604565 | 4.7036  | 5.5907  | -0.4526 |
| CHB | MUC12 | 100609565 | 10.8395 | 13.7226 | -0.6426 |
| CHB | MUC12 | 100614565 | 15.3666 | 14.5697 | 0.1678  |
| CHB | MUC12 | 100619565 | 15.5134 | 11.5202 | 1.0499  |
| CHB | MUC12 | 100624565 | 11.2562 | 9.3178  | 0.6213  |
| CHB | MUC12 | 100629565 | 9.5397  | 9.1484  | 0.1276  |
| CHB | MUC12 | 100634565 | 20.644  | 21.1769 | -0.0784 |
| CHB | MUC12 | 100639565 | 17.6507 | 17.7886 | -0.024  |
| CHB | MUC12 | 100644565 | 14.541  | 9.3178  | 1.6742  |
| CHB | MUC12 | 100649565 | 16.0653 | 12.1979 | 0.9635  |
| CHB | MUC12 | 100654565 | 5.2935  | 8.4708  | -1.1123 |
| CHB | MUC12 | 100659565 | 4.8921  | 8.979   | -1.3558 |
| CHB | MUC12 | 100664565 | 6.3449  | 9.3178  | -0.9529 |
| CHB | MUC12 | 100669565 | 8.3541  | 10.5037 | -0.6163 |
| CHB | MUC12 | 100674565 | 12.0352 | 15.5862 | -0.7011 |
| CHB | MUC12 | 100679565 | 14.1763 | 21.0075 | -1.0128 |
| CHB | MUC12 | 100684565 | 7.7396  | 15.5862 | -1.5493 |
| CHB | MUC12 | 100689565 | 4.8848  | 9.4872  | -1.4508 |
| CHB | MUC12 | 100694565 | 7.8903  | 12.0285 | -1.0447 |
| CHB | MUC12 | 100699565 | 10.2176 | 13.045  | -0.6611 |
| CHB | MUC12 | 100704565 | 14.2294 | 14.2309 | -0.0003 |
| CHB | MUC12 | 100709565 | 15.9515 | 16.2638 | -0.0592 |
| CHB | MUC12 | 100714565 | 18.7701 | 16.7721 | 0.3678  |
| CHB | MUC12 | 100719565 | 18.7922 | 16.2638 | 0.4793  |
| CHB | MUC12 | 100724565 | 12.2817 | 13.892  | -0.3547 |
| CHB | MUC12 | 100729565 | 7.9625  | 11.8591 | -0.9969 |
| CHB | MUC12 | 100734565 | 8.099   | 13.7226 | -1.2534 |
| CHB | MUC12 | 100739565 | 9.414   | 13.3838 | -0.906  |
| CHB | MUC12 | 100744565 | 9.8726  | 12.1979 | -0.5793 |
| CHB | MUC12 | 100749565 | 9.1076  | 11.8591 | -0.704  |
| CHB | MUC12 | 100754565 | 12.628  | 14.0615 | -0.3122 |
| CHB | MUC12 | 100759565 | 12.4719 | 16.2638 | -0.7189 |
| CHB | MUC12 | 100764565 | 9.4812  | 12.7061 | -0.7731 |
| CHB | MUC12 | 100769565 | 9.9905  | 11.5202 | -0.4022 |
| CHB | MUC12 | 100774565 | 11.1445 | 13.3838 | -0.5111 |
| CHB | MUC12 | 100779565 | 12.3347 | 11.6896 | 0.1673  |
| CHB | MUC12 | 100784565 | 11.3705 | 10.8426 | 0.1469  |
| CHB | MUC12 | 100789565 | 11.3767 | 11.5202 | -0.0377 |
| CHB | MUC12 | 100794565 | 13.0826 | 10.6731 | 0.6805  |

## 2\_TajimasD\_data

|     |       |           |         |         |         |
|-----|-------|-----------|---------|---------|---------|
| CHB | MUC12 | 100799565 | 16.5974 | 12.0285 | 1.1534  |
| CHB | MUC12 | 100804565 | 12.2117 | 9.4872  | 0.8588  |
| CHB | MUC12 | 100809565 | 7.3038  | 6.7766  | 0.2263  |
| CHB | MUC12 | 100814565 | 11.6556 | 9.9955  | 0.4985  |
| CHB | MUC12 | 100819565 | 10.6267 | 9.9955  | 0.1895  |
| CHB | MUC12 | 100824565 | 8.0516  | 9.1484  | -0.3576 |
| CHB | MUC12 | 100829565 | 7.7314  | 9.9955  | -0.6799 |
| CHB | MUC12 | 100834565 | 7.9739  | 10.5037 | -0.7253 |
| CHB | MUC12 | 100839565 | 8.2918  | 8.979   | -0.228  |
| CHB | MUC12 | 100844565 | 9.2321  | 9.4872  | -0.0804 |
| CHB | MUC12 | 100849565 | 14.6004 | 16.9415 | -0.4268 |
| CHB | MUC12 | 100854565 | 13.3889 | 17.2803 | -0.6962 |
| CHB | MUC12 | 100859565 | 9.4297  | 11.5202 | -0.5496 |
| CHB | MUC12 | 100864565 | 5.8923  | 7.9625  | -0.7672 |
| CHB | MUC12 | 100869565 | 2.3103  | 6.7766  | -1.9172 |
| CHB | MUC12 | 100874565 | 2.7729  | 6.4378  | -1.6479 |
| CHB | MUC12 | 100879565 | 3.8725  | 6.7766  | -1.2466 |
| CHB | MUC12 | 100884565 | 4.3198  | 7.7931  | -1.3127 |
| CHB | MUC12 | 100889565 | 3.5009  | 9.6567  | -1.9088 |
| CHB | MUC12 | 100894565 | 4.4308  | 14.4003 | -2.1226 |
| CHB | MUC12 | 100899565 | 3.8209  | 17.1109 | -2.4001 |
| CHB | MUC12 | 100904565 | 2.5656  | 15.2474 | -2.557  |
| CHB | MUC12 | 100909565 | 2.5397  | 14.2309 | -2.5173 |
| CHB | MUC12 | 100914565 | 4.4508  | 13.2144 | -2.0243 |
| CHB | MUC12 | 100919565 | 8.055   | 9.9955  | -0.5827 |
| CHB | MUC12 | 100924565 | 8.6552  | 9.3178  | -0.2124 |
| CHB | MUC12 | 100929565 | 15.8633 | 15.925  | -0.0119 |
| CHB | MUC12 | 100934565 | 17.1144 | 16.9415 | 0.0315  |
| CHB | MUC12 | 100939565 | 10.0965 | 11.8591 | -0.4509 |
| CHB | MUC12 | 100944565 | 7.9273  | 10.8426 | -0.8113 |
| CHB | MUC12 | 100949565 | 8.9003  | 11.6896 | -0.7234 |
| CHB | MUC12 | 100954565 | 12.2009 | 13.892  | -0.3725 |
| CHB | MUC12 | 100959565 | 12.5572 | 15.2474 | -0.5424 |
| CHB | MUC12 | 100964565 | 10.7604 | 14.5697 | -0.8021 |
| CHB | MUC12 | 100969565 | 9.6919  | 11.6896 | -0.5181 |
| CHB | MUC12 | 100974565 | 10.9433 | 11.5202 | -0.1517 |
| CHB | MUC12 | 100979565 | 18.5103 | 14.7391 | 0.7853  |
| CHB | MUC12 | 100984565 | 20.2723 | 14.2309 | 1.3008  |
| CHB | MUC12 | 100989565 | 16.8677 | 16.4333 | 0.0815  |
| CHB | MUC12 | 100994565 | 20.4222 | 20.4992 | -0.0117 |
| CHB | MUC12 | 100999565 | 19.3771 | 14.2309 | 1.1081  |
| CHB | MUC12 | 101004565 | 30.3221 | 16.0944 | 2.7245  |
| CHB | MUC12 | 101009565 | 44.5714 | 23.3793 | 2.8332  |
| CHB | MUC12 | 101014565 | 35.3485 | 21.1769 | 2.0848  |
| CHB | MUC12 | 101019565 | 19.2105 | 18.8051 | 0.0669  |
| CHB | MUC12 | 101024565 | 14.052  | 18.9745 | -0.805  |
| CHB | MUC12 | 101029565 | 16.6048 | 21.1769 | -0.6726 |
| CHB | MUC12 | 101034565 | 13.2867 | 16.7721 | -0.6416 |
| CHB | MUC12 | 101039565 | 8.8947  | 12.0285 | -0.7911 |



## 2\_TajimasD\_data

|     |       |           |         |         |         |
|-----|-------|-----------|---------|---------|---------|
| CHB | MUC12 | 101044565 | 10.1957 | 13.2144 | -0.6973 |
| CHB | MUC12 | 101049565 | 8.6543  | 12.3673 | -0.9131 |
| CHB | MUC12 | 101054565 | 6.035   | 12.1979 | -1.5354 |
| CHB | MUC12 | 101059565 | 7.1466  | 10.8426 | -1.0286 |
| CHB | MUC12 | 101064565 | 10.4019 | 9.9955  | 0.122   |
| CHB | MUC12 | 101069565 | 11.6328 | 10.1649 | 0.4339  |
| CHB | MUC12 | 101074565 | 11.9812 | 10.3343 | 0.4794  |
| CHB | MUC12 | 101079565 | 13.0664 | 11.8591 | 0.3089  |
| CHB | MUC12 | 101084565 | 12.894  | 12.7061 | 0.045   |
| CHB | MUC12 | 101089565 | 9.5536  | 11.5202 | -0.517  |
| CHB | MUC12 | 101094565 | 7.9181  | 13.5532 | -1.2708 |
| CHB | MUC12 | 101099565 | 13.1524 | 18.8051 | -0.9324 |
| CHB | MUC12 | 101104565 | 18.0703 | 19.1439 | -0.1741 |
| CHB | MUC12 | 101109565 | 14.2065 | 13.7226 | 0.1079  |
| CHB | MUC12 | 101114565 | 9.6796  | 12.1979 | -0.6274 |
| CHB | MUC12 | 101119565 | 10.2414 | 13.892  | -0.8042 |
| CHB | MUC12 | 101124565 | 11.4599 | 13.5532 | -0.4721 |
| CHB | MUC12 | 101129565 | 12.38   | 14.7391 | -0.4913 |
| CHB | MUC12 | 101134565 | 9.5985  | 14.0615 | -0.9719 |
| CHB | MUC12 | 101139565 | 7.7816  | 14.5697 | -1.4292 |
| CHB | MUC12 | 101144565 | 6.6591  | 14.7391 | -1.6826 |
| CHB | MUC12 | 101149565 | 7.3518  | 13.892  | -1.4408 |
| CHB | MUC12 | 101154565 | 10.604  | 16.6027 | -1.1151 |
| CHB | MUC12 | 101159565 | 11.039  | 17.1109 | -1.0965 |
| CHB | MUC12 | 101164565 | 8.173   | 13.5532 | -1.2133 |
| CHB | MUC12 | 101169565 | 5.5671  | 12.1979 | -1.652  |
| CHB | MUC12 | 101174565 | 5.562   | 13.7226 | -1.8188 |
| CHB | MUC12 | 101179565 | 5.4982  | 13.3838 | -1.7997 |
| CHB | MUC12 | 101184565 | 4.8671  | 11.1814 | -1.7073 |
| CHB | MUC12 | 101189565 | 5.9204  | 11.8591 | -1.5194 |
| CHB | MUC12 | 101194565 | 5.5385  | 11.8591 | -1.6171 |
| CHB | MUC12 | 101199565 | 5.8539  | 12.3673 | -1.6018 |
| CHB | MUC12 | 101204565 | 6.1697  | 12.1979 | -1.5019 |
| CHB | MUC12 | 101209565 | 4.1892  | 7.7931  | -1.3621 |
| CHB | MUC12 | 101214565 | 3.9661  | 7.2848  | -1.334  |
| CHB | MUC12 | 101219565 | 5.0672  | 7.4543  | -0.9396 |
| CHB | MUC12 | 101224565 | 7.4797  | 8.8096  | -0.449  |
| CHB | MUC12 | 101229565 | 8.028   | 9.1484  | -0.3653 |
| CHB | MUC12 | 101234565 | 8.2817  | 9.8261  | -0.4712 |
| CHB | MUC12 | 101239565 | 8.1749  | 11.5202 | -0.8795 |
| CHB | MUC12 | 101244565 | 7.9791  | 10.6731 | -0.7609 |
| CHB | MUC12 | 101249565 | 8.7773  | 9.6567  | -0.2727 |
| CHB | MUC12 | 101254565 | 7.2924  | 8.4708  | -0.4125 |
| CHB | MUC12 | 101259565 | 6.5109  | 9.3178  | -0.8997 |
| CHB | MUC12 | 101264565 | 5.7219  | 10.1649 | -1.3134 |
| CHB | MUC12 | 101269565 | 7.7106  | 12.5367 | -1.1717 |
| CHB | MUC12 | 101274565 | 11.0394 | 15.5862 | -0.8978 |
| CHB | MUC12 | 101279565 | 13.6511 | 15.4168 | -0.3523 |
| CHB | MUC12 | 101284565 | 14.2846 | 13.892  | 0.0865  |

## 2\_TajimasD\_data

|     |       |           |         |         |         |
|-----|-------|-----------|---------|---------|---------|
| CHB | MUC12 | 101289565 | 7.8325  | 7.6237  | 0.0805  |
| CHB | MUC12 | 101294565 | 3.0645  | 1.8636  | 1.5322  |
| CHB | MUC12 | 101299565 | 2.1401  | 1.5247  | 0.9143  |
| CHB | MUC12 | 101304565 | 2.0919  | 1.5247  | 0.8427  |
| CHB | MUC12 | 101309565 | 2.0769  | 1.5247  | 0.8204  |
| CHB | MUC12 | 101314565 | 0.5405  | 0.6777  | -0.3587 |
| CHB | MUC12 | 101319565 | 0.2764  | 0.5082  | -0.7277 |
| CHB | MUC12 | 101324565 | 1.2722  | 2.033   | -0.9073 |
| CHB | MUC12 | 101329565 | 4.3102  | 7.9625  | -1.3534 |
| CHB | MUC12 | 101334565 | 8.2184  | 12.1979 | -0.9915 |
| CHB | MUC12 | 101339565 | 9.0845  | 11.8591 | -0.7099 |
| CHB | MUC12 | 101344565 | 8.4755  | 12.8755 | -1.0417 |
| CHB | MUC12 | 101349565 | 11.0337 | 12.1979 | -0.2901 |
| CHB | MUC12 | 101354565 | 13.253  | 10.5037 | 0.7882  |
| CHB | MUC12 | 101359565 | 10.0358 | 8.4708  | 0.5479  |
| CHB | MUC12 | 101364565 | 8.3499  | 7.1154  | 0.507   |
| CHB | MUC12 | 101369565 | 8.9315  | 9.3178  | -0.1238 |
| CHB | MUC12 | 101374565 | 8.4     | 12.1979 | -0.9462 |
| CHB | MUC12 | 101379565 | 8.5652  | 12.0285 | -0.8743 |
| CHB | MUC12 | 101384565 | 8.131   | 10.3343 | -0.6413 |
| CHB | MUC12 | 101389565 | 7.8677  | 10.1649 | -0.6791 |
| CHB | MUC12 | 101394565 | 5.8896  | 8.3013  | -0.8601 |
| CHB | MUC12 | 101399565 | 6.1654  | 7.6237  | -0.5624 |
| CHB | MUC12 | 101404565 | 8.3975  | 9.1484  | -0.2448 |
| CHB | MUC12 | 101409565 | 10.2248 | 11.8591 | -0.4181 |
| CHB | MUC12 | 101414565 | 9.2201  | 12.8755 | -0.8654 |
| CHB | MUC12 | 101419565 | 7.08    | 12.7061 | -1.3487 |
| CHB | MUC12 | 101424565 | 7.458   | 11.3508 | -1.0378 |
| CHB | MUC12 | 101429565 | 8.3326  | 8.8096  | -0.161  |
| CHB | MUC12 | 101434565 | 11.1513 | 12.5367 | -0.3364 |
| CHB | MUC12 | 101439565 | 11.9951 | 13.2144 | -0.2817 |
| CHB | MUC12 | 101444565 | 10.351  | 9.9955  | 0.1068  |
| CHB | MUC12 | 101449565 | 7.4963  | 8.6402  | -0.3932 |
| CHB | MUC12 | 101454565 | 3.7799  | 6.2684  | -1.1461 |
| CHB | MUC12 | 101459565 | 3.0114  | 4.066   | -0.7112 |
| CHB | MUC12 | 101464565 | 4.1673  | 5.9295  | -0.8531 |
| CHB | MUC12 | 101469565 | 4.2753  | 7.6237  | -1.2912 |
| CHB | MUC12 | 101474565 | 4.1751  | 7.6237  | -1.3299 |
| CHB | MUC12 | 101479565 | 3.2207  | 8.979   | -1.9102 |
| CHB | MUC12 | 101484565 | 2.1046  | 7.6237  | -2.1283 |
| CHB | MUC12 | 101489565 | 3.0051  | 6.6072  | -1.5821 |
| CHB | MUC12 | 101494565 | 6.1682  | 7.4543  | -0.5062 |
| CHB | MUC12 | 101499565 | 5.7635  | 5.4213  | 0.1794  |
| CHB | MUC12 | 101504565 | 3.4377  | 5.5907  | -1.0985 |
| CHB | MUC12 | 101509565 | 4.0013  | 6.6072  | -1.1445 |
| YRI | MUC12 | 100474565 | 7.2653  | 15.6298 | -1.6416 |
| YRI | MUC12 | 100479565 | 7.5173  | 13.445  | -1.3425 |
| YRI | MUC12 | 100484565 | 7.578   | 10.5879 | -0.8536 |
| YRI | MUC12 | 100489565 | 7.3423  | 11.2602 | -1.0488 |

## 2\_TajimasD\_data

|     |       |           |         |         |         |
|-----|-------|-----------|---------|---------|---------|
| YRI | MUC12 | 100494565 | 10.8204 | 14.2853 | -0.7408 |
| YRI | MUC12 | 100499565 | 15.0074 | 14.9575 | 0.0102  |
| YRI | MUC12 | 100504565 | 14.7367 | 13.7811 | 0.2114  |
| YRI | MUC12 | 100509565 | 14.6321 | 15.6298 | -0.1958 |
| YRI | MUC12 | 100514565 | 12.9288 | 15.7978 | -0.5573 |
| YRI | MUC12 | 100519565 | 11.6256 | 14.7895 | -0.6545 |
| YRI | MUC12 | 100524565 | 13.5732 | 16.9743 | -0.6169 |
| YRI | MUC12 | 100529565 | 13.8472 | 16.6382 | -0.516  |
| YRI | MUC12 | 100534565 | 14.0211 | 14.7895 | -0.159  |
| YRI | MUC12 | 100539565 | 11.8848 | 14.1172 | -0.4827 |
| YRI | MUC12 | 100544565 | 9.2378  | 14.7895 | -1.1485 |
| YRI | MUC12 | 100549565 | 30.7276 | 28.2345 | 0.2766  |
| YRI | MUC12 | 100554565 | 27.4434 | 22.5203 | 0.6802  |
| YRI | MUC12 | 100559565 | 1.8344  | 2.689   | -0.8122 |
| YRI | MUC12 | 100564565 | 0       | 0       | 0       |
| YRI | MUC12 | 100569565 | 0       | 0       | 0       |
| YRI | MUC12 | 100574565 | 0       | 0       | 0       |
| YRI | MUC12 | 100579565 | 0       | 0       | 0       |
| YRI | MUC12 | 100584565 | 0       | 0       | 0       |
| YRI | MUC12 | 100589565 | 0       | 0       | 0       |
| YRI | MUC12 | 100594565 | 0       | 0       | 0       |
| YRI | MUC12 | 100599565 | 0       | 0       | 0       |
| YRI | MUC12 | 100604565 | 5.3879  | 5.5461  | -0.081  |
| YRI | MUC12 | 100609565 | 13.7929 | 15.9659 | -0.4179 |
| YRI | MUC12 | 100614565 | 17.3253 | 17.9827 | -0.1128 |
| YRI | MUC12 | 100619565 | 15.7474 | 13.9492 | 0.3933  |
| YRI | MUC12 | 100624565 | 11.4284 | 12.4366 | -0.2458 |
| YRI | MUC12 | 100629565 | 11.0807 | 13.2769 | -0.5033 |
| YRI | MUC12 | 100634565 | 24.6913 | 25.0413 | -0.0436 |
| YRI | MUC12 | 100639565 | 20.4782 | 20.8397 | -0.0538 |
| YRI | MUC12 | 100644565 | 14.9772 | 12.7727 | 0.5241  |
| YRI | MUC12 | 100649565 | 16.9071 | 15.2937 | 0.3233  |
| YRI | MUC12 | 100654565 | 7.3332  | 10.924  | -0.989  |
| YRI | MUC12 | 100659565 | 7.0844  | 13.7811 | -1.4815 |
| YRI | MUC12 | 100664565 | 8.8219  | 15.7978 | -1.3552 |
| YRI | MUC12 | 100669565 | 10.0839 | 15.9659 | -1.1312 |
| YRI | MUC12 | 100674565 | 13.9139 | 22.1842 | -1.1594 |
| YRI | MUC12 | 100679565 | 15.9064 | 27.3941 | -1.3124 |
| YRI | MUC12 | 100684565 | 8.8239  | 19.4952 | -1.6945 |
| YRI | MUC12 | 100689565 | 5.6977  | 12.2685 | -1.6226 |
| YRI | MUC12 | 100694565 | 9.5582  | 14.2853 | -1.0107 |
| YRI | MUC12 | 100699565 | 11.8266 | 15.2937 | -0.6947 |
| YRI | MUC12 | 100704565 | 17.2587 | 17.3104 | -0.0092 |
| YRI | MUC12 | 100709565 | 20.449  | 17.6465 | 0.4897  |
| YRI | MUC12 | 100714565 | 21.8081 | 18.3188 | 0.5882  |
| YRI | MUC12 | 100719565 | 24.3702 | 20.6717 | 0.5551  |
| YRI | MUC12 | 100724565 | 17.4242 | 16.6382 | 0.1453  |
| YRI | MUC12 | 100729565 | 10.6178 | 13.445  | -0.6403 |
| YRI | MUC12 | 100734565 | 14.4881 | 18.1507 | -0.623  |

## 2\_TajimasD\_data

|     |       |           |         |         |         |
|-----|-------|-----------|---------|---------|---------|
| YRI | MUC12 | 100739565 | 14.6124 | 18.823  | -0.6916 |
| YRI | MUC12 | 100744565 | 12.4419 | 14.4534 | -0.4253 |
| YRI | MUC12 | 100749565 | 12.4715 | 14.7895 | -0.4795 |
| YRI | MUC12 | 100754565 | 16.964  | 18.6549 | -0.2801 |
| YRI | MUC12 | 100759565 | 17.5533 | 18.823  | -0.2085 |
| YRI | MUC12 | 100764565 | 11.8316 | 15.7978 | -0.7705 |
| YRI | MUC12 | 100769565 | 13.1134 | 17.3104 | -0.7471 |
| YRI | MUC12 | 100774565 | 15.2602 | 18.4868 | -0.5392 |
| YRI | MUC12 | 100779565 | 14.5213 | 15.7978 | -0.248  |
| YRI | MUC12 | 100784565 | 13.7075 | 15.1256 | -0.2872 |
| YRI | MUC12 | 100789565 | 13.4793 | 14.7895 | -0.271  |
| YRI | MUC12 | 100794565 | 13.9351 | 14.7895 | -0.1768 |
| YRI | MUC12 | 100799565 | 16.6571 | 14.1172 | 0.5492  |
| YRI | MUC12 | 100804565 | 12.4297 | 10.4199 | 0.5786  |
| YRI | MUC12 | 100809565 | 7.583   | 9.7476  | -0.6631 |
| YRI | MUC12 | 100814565 | 10.6016 | 12.9408 | -0.5493 |
| YRI | MUC12 | 100819565 | 10.3419 | 13.1089 | -0.6418 |
| YRI | MUC12 | 100824565 | 9.3048  | 13.7811 | -0.9903 |
| YRI | MUC12 | 100829565 | 9.8165  | 19.3272 | -1.5229 |
| YRI | MUC12 | 100834565 | 11.3276 | 20.3355 | -1.3734 |
| YRI | MUC12 | 100839565 | 11.1955 | 15.6298 | -0.8703 |
| YRI | MUC12 | 100844565 | 11.5095 | 18.1507 | -1.1296 |
| YRI | MUC12 | 100849565 | 12.9363 | 22.8565 | -1.3511 |
| YRI | MUC12 | 100854565 | 8.5608  | 19.8313 | -1.7605 |
| YRI | MUC12 | 100859565 | 9.7863  | 15.9659 | -1.1884 |
| YRI | MUC12 | 100864565 | 9.938   | 13.445  | -0.7942 |
| YRI | MUC12 | 100869565 | 6.5047  | 13.2769 | -1.5521 |
| YRI | MUC12 | 100874565 | 6.8551  | 11.7644 | -1.2612 |
| YRI | MUC12 | 100879565 | 8.0988  | 11.5963 | -0.9108 |
| YRI | MUC12 | 100884565 | 8.5484  | 14.1172 | -1.2041 |
| YRI | MUC12 | 100889565 | 10.0099 | 14.6214 | -0.9644 |
| YRI | MUC12 | 100894565 | 18.8724 | 18.6549 | 0.036   |
| YRI | MUC12 | 100899565 | 25.5942 | 22.0162 | 0.5053  |
| YRI | MUC12 | 100904565 | 23.7911 | 20.1675 | 0.5569  |
| YRI | MUC12 | 100909565 | 24.0104 | 20.5036 | 0.5304  |
| YRI | MUC12 | 100914565 | 20.6096 | 22.8565 | -0.306  |
| YRI | MUC12 | 100919565 | 14.5179 | 24.201  | -1.2477 |
| YRI | MUC12 | 100924565 | 12.1584 | 19.8313 | -1.1985 |
| YRI | MUC12 | 100929565 | 19.1213 | 21.68   | -0.3667 |
| YRI | MUC12 | 100934565 | 22.7373 | 22.6884 | 0.0067  |
| YRI | MUC12 | 100939565 | 15.1618 | 14.1172 | 0.2259  |
| YRI | MUC12 | 100944565 | 12.7639 | 13.613  | -0.19   |
| YRI | MUC12 | 100949565 | 16.2354 | 17.6465 | -0.2466 |
| YRI | MUC12 | 100954565 | 17.5905 | 17.4785 | 0.0198  |
| YRI | MUC12 | 100959565 | 16.9224 | 16.134  | 0.1501  |
| YRI | MUC12 | 100964565 | 17.1499 | 16.9743 | 0.0318  |
| YRI | MUC12 | 100969565 | 14.6639 | 15.2937 | -0.1262 |
| YRI | MUC12 | 100974565 | 15.9552 | 15.4617 | 0.0979  |
| YRI | MUC12 | 100979565 | 21.7052 | 18.823  | 0.4734  |

## 2\_TajimasD\_data

|     |       |           |         |         |         |
|-----|-------|-----------|---------|---------|---------|
| YRI | MUC12 | 100984565 | 21.1171 | 17.8146 | 0.5719  |
| YRI | MUC12 | 100989565 | 19.9081 | 20.3355 | -0.0652 |
| YRI | MUC12 | 100994565 | 24.765  | 24.369  | 0.0507  |
| YRI | MUC12 | 100999565 | 19.9663 | 17.8146 | 0.3726  |
| YRI | MUC12 | 101004565 | 24.0788 | 21.3439 | 0.398   |
| YRI | MUC12 | 101009565 | 36.5274 | 30.2512 | 0.651   |
| YRI | MUC12 | 101014565 | 29.4276 | 24.8732 | 0.5715  |
| YRI | MUC12 | 101019565 | 21.0301 | 20.3355 | 0.1059  |
| YRI | MUC12 | 101024565 | 22.2124 | 24.0329 | -0.2362 |
| YRI | MUC12 | 101029565 | 26.2189 | 28.9067 | -0.2914 |
| YRI | MUC12 | 101034565 | 22.4036 | 24.369  | -0.2516 |
| YRI | MUC12 | 101039565 | 16.6582 | 17.3104 | -0.1161 |
| YRI | MUC12 | 101044565 | 17.9962 | 19.8313 | -0.2866 |
| YRI | MUC12 | 101049565 | 14.2854 | 19.1591 | -0.787  |
| YRI | MUC12 | 101054565 | 10.7747 | 15.4617 | -0.9294 |
| YRI | MUC12 | 101059565 | 10.4264 | 15.6298 | -1.0212 |
| YRI | MUC12 | 101064565 | 11.9746 | 17.4785 | -0.9706 |
| YRI | MUC12 | 101069565 | 12.5296 | 17.3104 | -0.851  |
| YRI | MUC12 | 101074565 | 12.0537 | 14.9575 | -0.5943 |
| YRI | MUC12 | 101079565 | 15.6933 | 16.8062 | -0.2038 |
| YRI | MUC12 | 101084565 | 15.1444 | 16.9743 | -0.3319 |
| YRI | MUC12 | 101089565 | 10.7729 | 14.1172 | -0.7231 |
| YRI | MUC12 | 101094565 | 16.6906 | 18.4868 | -0.3002 |
| YRI | MUC12 | 101099565 | 31.7989 | 25.7135 | 0.7394  |
| YRI | MUC12 | 101104565 | 38.3195 | 25.2093 | 1.6238  |
| YRI | MUC12 | 101109565 | 27.3719 | 20.8397 | 0.9727  |
| YRI | MUC12 | 101114565 | 20.2226 | 20.6717 | -0.0674 |
| YRI | MUC12 | 101119565 | 21.2449 | 19.6633 | 0.2491  |
| YRI | MUC12 | 101124565 | 19.8465 | 18.1507 | 0.2884  |
| YRI | MUC12 | 101129565 | 23.5646 | 23.5287 | 0.0048  |
| YRI | MUC12 | 101134565 | 25.3313 | 24.369  | 0.1232  |
| YRI | MUC12 | 101139565 | 25.1704 | 22.0162 | 0.4454  |
| YRI | MUC12 | 101144565 | 21.7009 | 19.8313 | 0.292   |
| YRI | MUC12 | 101149565 | 22.2631 | 20.3355 | 0.2939  |
| YRI | MUC12 | 101154565 | 30.5601 | 24.7051 | 0.7395  |
| YRI | MUC12 | 101159565 | 30.6141 | 26.5538 | 0.4781  |
| YRI | MUC12 | 101164565 | 20.7912 | 24.0329 | -0.4205 |
| YRI | MUC12 | 101169565 | 14.8892 | 19.4952 | -0.7314 |
| YRI | MUC12 | 101174565 | 18.4174 | 19.1591 | -0.1198 |
| YRI | MUC12 | 101179565 | 16.908  | 18.991  | -0.3392 |
| YRI | MUC12 | 101184565 | 13.028  | 15.7978 | -0.5381 |
| YRI | MUC12 | 101189565 | 18.6545 | 17.4785 | 0.2074  |
| YRI | MUC12 | 101194565 | 17.7153 | 16.4701 | 0.2325  |
| YRI | MUC12 | 101199565 | 15.9354 | 16.6382 | -0.1299 |
| YRI | MUC12 | 101204565 | 17.1522 | 19.1591 | -0.3241 |
| YRI | MUC12 | 101209565 | 11.138  | 14.2853 | -0.6729 |
| YRI | MUC12 | 101214565 | 8.435   | 12.4366 | -0.9756 |
| YRI | MUC12 | 101219565 | 8.4727  | 13.445  | -1.1261 |
| YRI | MUC12 | 101224565 | 12.1385 | 15.2937 | -0.6322 |

## 2\_TajimasD\_data

|     |       |           |         |         |         |
|-----|-------|-----------|---------|---------|---------|
| YRI | MUC12 | 101229565 | 13.1923 | 15.2937 | -0.4211 |
| YRI | MUC12 | 101234565 | 11.9602 | 16.134  | -0.7947 |
| YRI | MUC12 | 101239565 | 9.8451  | 15.1256 | -1.0693 |
| YRI | MUC12 | 101244565 | 10.2844 | 14.2853 | -0.8554 |
| YRI | MUC12 | 101249565 | 14.5029 | 15.2937 | -0.1585 |
| YRI | MUC12 | 101254565 | 12.7105 | 12.9408 | -0.0541 |
| YRI | MUC12 | 101259565 | 9.2916  | 13.7811 | -0.9932 |
| YRI | MUC12 | 101264565 | 9.6439  | 17.3104 | -1.3646 |
| YRI | MUC12 | 101269565 | 15.3507 | 19.4952 | -0.6581 |
| YRI | MUC12 | 101274565 | 18.1227 | 18.991  | -0.1414 |
| YRI | MUC12 | 101279565 | 17.6148 | 18.823  | -0.1984 |
| YRI | MUC12 | 101284565 | 17.4457 | 17.4785 | -0.0058 |
| YRI | MUC12 | 101289565 | 8.9942  | 9.0754  | -0.0266 |
| YRI | MUC12 | 101294565 | 2.6597  | 3.1932  | -0.44   |
| YRI | MUC12 | 101299565 | 2.999   | 3.3612  | -0.2862 |
| YRI | MUC12 | 101304565 | 3.3676  | 3.3612  | 0.0051  |
| YRI | MUC12 | 101309565 | 3.6263  | 4.3696  | -0.4693 |
| YRI | MUC12 | 101314565 | 1.5395  | 2.689   | -1.0924 |
| YRI | MUC12 | 101319565 | 0.5652  | 1.0084  | -0.8836 |
| YRI | MUC12 | 101324565 | 4.0251  | 3.1932  | 0.6861  |
| YRI | MUC12 | 101329565 | 9.3737  | 11.0921 | -0.4666 |
| YRI | MUC12 | 101334565 | 14.3806 | 18.3188 | -0.6639 |
| YRI | MUC12 | 101339565 | 15.6218 | 18.1507 | -0.4301 |
| YRI | MUC12 | 101344565 | 16.9996 | 21.512  | -0.6517 |
| YRI | MUC12 | 101349565 | 18.5286 | 21.8481 | -0.4723 |
| YRI | MUC12 | 101354565 | 14.157  | 16.9743 | -0.511  |
| YRI | MUC12 | 101359565 | 11.3584 | 17.1423 | -1.0392 |
| YRI | MUC12 | 101364565 | 11.481  | 16.9743 | -0.9963 |
| YRI | MUC12 | 101369565 | 13.5491 | 14.4534 | -0.1912 |
| YRI | MUC12 | 101374565 | 15.6111 | 15.6298 | -0.0037 |
| YRI | MUC12 | 101379565 | 16.8265 | 18.1507 | -0.2252 |
| YRI | MUC12 | 101384565 | 17.1293 | 17.1423 | -0.0023 |
| YRI | MUC12 | 101389565 | 17.3039 | 15.7978 | 0.2926  |
| YRI | MUC12 | 101394565 | 14.199  | 12.7727 | 0.3391  |
| YRI | MUC12 | 101399565 | 9.8047  | 13.1089 | -0.7665 |
| YRI | MUC12 | 101404565 | 10.4669 | 14.7895 | -0.8942 |
| YRI | MUC12 | 101409565 | 13.3358 | 16.8062 | -0.6355 |
| YRI | MUC12 | 101414565 | 16.4502 | 19.6633 | -0.506  |
| YRI | MUC12 | 101419565 | 16.0832 | 18.3188 | -0.3769 |
| YRI | MUC12 | 101424565 | 14.5429 | 15.6298 | -0.2133 |
| YRI | MUC12 | 101429565 | 17.2137 | 16.4701 | 0.1388  |
| YRI | MUC12 | 101434565 | 20.6291 | 17.1423 | 0.6265  |
| YRI | MUC12 | 101439565 | 17.9977 | 14.2853 | 0.7937  |
| YRI | MUC12 | 101444565 | 14.6512 | 14.1172 | 0.1155  |
| YRI | MUC12 | 101449565 | 10.9691 | 14.7895 | -0.7903 |
| YRI | MUC12 | 101454565 | 7.1796  | 13.7811 | -1.4605 |
| YRI | MUC12 | 101459565 | 5.3181  | 9.7476  | -1.3569 |
| YRI | MUC12 | 101464565 | 4.6793  | 10.2518 | -1.6287 |
| YRI | MUC12 | 101469565 | 7.0588  | 12.9408 | -1.3812 |

## 2\_TajimasD\_data

|     |        |           |        |         |         |
|-----|--------|-----------|--------|---------|---------|
| YRI | MUC12  | 101474565 | 7.702  | 11.0921 | -0.9204 |
| YRI | MUC12  | 101479565 | 7.1844 | 10.756  | -0.9981 |
| YRI | MUC12  | 101484565 | 5.5411 | 9.4115  | -1.225  |
| YRI | MUC12  | 101489565 | 7.7414 | 9.5795  | -0.5723 |
| YRI | MUC12  | 101494565 | 12.465 | 12.7727 | -0.0732 |
| YRI | MUC12  | 101499565 | 9.2911 | 10.756  | -0.4094 |
| YRI | MUC12  | 101504565 | 5.5637 | 8.5712  | -1.0379 |
| YRI | MUC12  | 101509565 | 6.2593 | 10.4199 | -1.1977 |
| CEU | NBPF11 | 147607151 | 0.2119 | 0.1706  | 0.2453  |
| CEU | NBPF11 | 147612151 | 0      | 0       | 0       |
| CEU | NBPF11 | 147617151 | 0      | 0       | 0       |
| CEU | NBPF11 | 147622151 | 0      | 0       | 0       |
| CEU | NBPF11 | 147627151 | 2.2855 | 2.5584  | -0.2719 |
| CEU | NBPF11 | 147632151 | 2.2855 | 2.5584  | -0.2719 |
| CEU | NBPF11 | 147637151 | 0      | 0       | 0       |
| CEU | NBPF11 | 147642151 | 0      | 0       | 0       |
| CEU | NBPF11 | 147647151 | 0      | 0       | 0       |
| CEU | NBPF11 | 147652151 | 0      | 0       | 0       |
| CEU | NBPF11 | 147657151 | 0      | 0       | 0       |
| CEU | NBPF11 | 147662151 | 0      | 0       | 0       |
| CEU | NBPF11 | 147667151 | 0.0202 | 0.3411  | -1.2864 |
| CEU | NBPF11 | 147672151 | 0.0202 | 0.3411  | -1.2864 |
| CEU | NBPF11 | 147677151 | 0      | 0       | 0       |
| CEU | NBPF11 | 147682151 | 0      | 0       | 0       |
| CEU | NBPF11 | 147687151 | 0      | 0       | 0       |
| CEU | NBPF11 | 147692151 | 0.3723 | 0.5117  | -0.4372 |
| CEU | NBPF11 | 147697151 | 0.3925 | 0.8528  | -1.0366 |
| CEU | NBPF11 | 147702151 | 1.0447 | 1.1939  | -0.2659 |
| CEU | NBPF11 | 147707151 | 1.5366 | 2.5584  | -1.0179 |
| CEU | NBPF11 | 147712151 | 1.5409 | 4.0935  | -1.7164 |
| CEU | NBPF11 | 147717151 | 2.1653 | 4.6052  | -1.4814 |
| CEU | NBPF11 | 147722151 | 2.691  | 5.1169  | -1.3428 |
| CEU | NBPF11 | 147727151 | 3.2136 | 5.9697  | -1.3301 |
| CEU | NBPF11 | 147732151 | 6.0111 | 10.2337 | -1.244  |
| CEU | NBPF11 | 147737151 | 5.786  | 10.0632 | -1.28   |
| CEU | NBPF11 | 147742151 | 3.8757 | 8.0164  | -1.5294 |
| CEU | NBPF11 | 147747151 | 5.2719 | 9.5515  | -1.3445 |
| CEU | NBPF11 | 147752151 | 4.1538 | 6.6519  | -1.0937 |
| CEU | NBPF11 | 147757151 | 6.1612 | 8.0164  | -0.6852 |
| CEU | NBPF11 | 147762151 | 6.2224 | 8.3576  | -0.759  |
| CEU | NBPF11 | 147767151 | 3.3177 | 5.9697  | -1.2799 |
| CEU | NBPF11 | 147772151 | 3.5854 | 4.7757  | -0.7001 |
| CEU | NBPF11 | 147777151 | 4.9235 | 5.2874  | -0.1957 |
| CEU | NBPF11 | 147782151 | 8.2923 | 8.5281  | -0.0823 |
| CEU | NBPF11 | 147787151 | 7.4051 | 8.6987  | -0.4432 |
| CEU | NBPF11 | 147792151 | 6.0759 | 9.0398  | -0.9799 |
| CEU | NBPF11 | 147797151 | 6.5422 | 9.7221  | -0.9827 |
| CEU | NBPF11 | 147802151 | 6.6432 | 10.4043 | -1.0911 |
| CEU | NBPF11 | 147807151 | 6.5735 | 10.916  | -1.2044 |

## 2\_TajimasD\_data

|     |        |           |         |         |         |
|-----|--------|-----------|---------|---------|---------|
| CEU | NBPF11 | 147812151 | 5.4278  | 9.7221  | -1.3271 |
| CEU | NBPF11 | 147817151 | 8.407   | 11.0866 | -0.7325 |
| CEU | NBPF11 | 147822151 | 10.3521 | 12.9627 | -0.6159 |
| CEU | NBPF11 | 147827151 | 6.851   | 9.3809  | -0.8082 |
| CEU | NBPF11 | 147832151 | 2.9749  | 3.9229  | -0.6612 |
| CEU | NBPF11 | 147837151 | 0.8491  | 1.0234  | -0.3463 |
| CEU | NBPF11 | 147842151 | 0.5079  | 0.6822  | -0.4551 |
| CEU | NBPF11 | 147847151 | 0.5079  | 0.6822  | -0.4551 |
| CEU | NBPF11 | 147852151 | 0.2847  | 0.6822  | -1.038  |
| CEU | NBPF11 | 147857151 | 0.4193  | 1.1939  | -1.3804 |
| CEU | NBPF11 | 147862151 | 0.2672  | 0.6822  | -1.0837 |
| CEU | NBPF11 | 147867151 | 0.2589  | 0.1706  | 0.5245  |
| CEU | NBPF11 | 147872151 | 0.2589  | 0.1706  | 0.5245  |
| CEU | NBPF11 | 147877151 | 0       | 0       | 0       |
| CEU | NBPF11 | 147882151 | 0       | 0       | 0       |
| CEU | NBPF11 | 147887151 | 0       | 0       | 0       |
| CEU | NBPF11 | 147892151 | 0       | 0       | 0       |
| CEU | NBPF11 | 147897151 | 0.451   | 0.1706  | 1.6656  |
| CEU | NBPF11 | 147902151 | 0.451   | 0.1706  | 1.6656  |
| CEU | NBPF11 | 147907151 | 0.0101  | 0.1706  | -0.9534 |
| CEU | NBPF11 | 147912151 | 0.1328  | 0.3411  | -0.835  |
| CEU | NBPF11 | 147917151 | 1.214   | 0.8528  | 0.8134  |
| CEU | NBPF11 | 147922151 | 2.0998  | 1.5351  | 0.8373  |
| CEU | NBPF11 | 147927151 | 1.0186  | 1.0234  | -0.0095 |
| CEU | NBPF11 | 147932151 | 0.0101  | 0.1706  | -0.9534 |
| CEU | NBPF11 | 147937151 | 0       | 0       | 0       |
| CEU | NBPF11 | 147942151 | 0.5727  | 0.5117  | 0.1913  |
| CEU | NBPF11 | 147947151 | 1.1093  | 1.1939  | -0.1508 |
| CEU | NBPF11 | 147952151 | 3.4374  | 2.8996  | 0.4837  |
| CEU | NBPF11 | 147957151 | 3.2684  | 3.2407  | 0.0227  |
| CEU | NBPF11 | 147962151 | 0.3676  | 1.0234  | -1.3031 |
| CEU | NBPF11 | 147967151 | 0.0594  | 0.3411  | -1.1293 |
| CEU | NBPF11 | 147972151 | 1.1266  | 1.8762  | -0.9544 |
| CEU | NBPF11 | 147977151 | 1.0872  | 1.7056  | -0.847  |
| CEU | NBPF11 | 147982151 | 0.02    | 0.1706  | -0.8946 |
| CEU | NBPF11 | 147987151 | 0       | 0       | 0       |
| CEU | NBPF11 | 147992151 | 2.1769  | 1.7056  | 0.6455  |
| CEU | NBPF11 | 147997151 | 6.6677  | 6.3108  | 0.1639  |
| CEU | NBPF11 | 148002151 | 10.1849 | 10.916  | -0.2028 |
| CEU | NBPF11 | 148007151 | 7.3034  | 9.8926  | -0.7873 |
| CEU | NBPF11 | 148012151 | 3.1723  | 6.3108  | -1.4409 |
| CEU | NBPF11 | 148017151 | 4.9231  | 5.9697  | -0.5051 |
| CEU | NBPF11 | 148022151 | 8.2422  | 9.7221  | -0.4573 |
| CEU | NBPF11 | 148027151 | 4.8821  | 6.4814  | -0.7168 |
| CEU | NBPF11 | 148032151 | 0       | 0       | 0       |
| CEU | NBPF11 | 148037151 | 0       | 0       | 0       |
| CEU | NBPF11 | 148042151 | 0       | 0       | 0       |
| CEU | NBPF11 | 148047151 | 0       | 0       | 0       |
| CEU | NBPF11 | 148052151 | 0       | 0       | 0       |



## 2\_TajimasD\_data

|     |        |           |        |        |         |
|-----|--------|-----------|--------|--------|---------|
| CEU | NBPF11 | 148057151 | 0      | 0      | 0       |
| CEU | NBPF11 | 148062151 | 0      | 0      | 0       |
| CEU | NBPF11 | 148067151 | 0      | 0      | 0       |
| CEU | NBPF11 | 148072151 | 0      | 0      | 0       |
| CEU | NBPF11 | 148077151 | 0      | 0      | 0       |
| CEU | NBPF11 | 148082151 | 0      | 0      | 0       |
| CEU | NBPF11 | 148087151 | 0      | 0      | 0       |
| CEU | NBPF11 | 148092151 | 0      | 0      | 0       |
| CEU | NBPF11 | 148097151 | 0      | 0      | 0       |
| CEU | NBPF11 | 148102151 | 0      | 0      | 0       |
| CEU | NBPF11 | 148107151 | 0      | 0      | 0       |
| CEU | NBPF11 | 148112151 | 0      | 0      | 0       |
| CEU | NBPF11 | 148117151 | 0      | 0      | 0       |
| CEU | NBPF11 | 148122151 | 0      | 0      | 0       |
| CEU | NBPF11 | 148127151 | 0      | 0      | 0       |
| CEU | NBPF11 | 148132151 | 0      | 0      | 0       |
| CEU | NBPF11 | 148137151 | 0      | 0      | 0       |
| CEU | NBPF11 | 148142151 | 0      | 0      | 0       |
| CEU | NBPF11 | 148147151 | 0      | 0      | 0       |
| CEU | NBPF11 | 148152151 | 0      | 0      | 0       |
| CEU | NBPF11 | 148157151 | 0      | 0      | 0       |
| CEU | NBPF11 | 148162151 | 0      | 0      | 0       |
| CEU | NBPF11 | 148167151 | 0      | 0      | 0       |
| CEU | NBPF11 | 148172151 | 0.0202 | 0.3411 | -1.2864 |
| CEU | NBPF11 | 148177151 | 0.2585 | 1.7056 | -1.982  |
| CEU | NBPF11 | 148182151 | 0.8664 | 3.0701 | -1.8903 |
| CEU | NBPF11 | 148187151 | 0.7969 | 2.5584 | -1.7547 |
| CEU | NBPF11 | 148192151 | 0.3824 | 2.0467 | -1.9803 |
| CEU | NBPF11 | 148197151 | 0.2136 | 1.1939 | -1.7469 |
| CEU | NBPF11 | 148202151 | 0.5294 | 1.0234 | -0.9816 |
| CEU | NBPF11 | 148207151 | 1.7258 | 2.5584 | -0.8294 |
| CEU | NBPF11 | 148212151 | 1.7425 | 2.0467 | -0.362  |
| CEU | NBPF11 | 148217151 | 1.3024 | 2.0467 | -0.8856 |
| CEU | NBPF11 | 148222151 | 1.2801 | 2.729  | -1.3695 |
| CEU | NBPF11 | 148227151 | 1.1323 | 2.0467 | -1.088  |
| CEU | NBPF11 | 148232151 | 1.3055 | 2.5584 | -1.2481 |
| CEU | NBPF11 | 148237151 | 2.885  | 8.187  | -1.9208 |
| CEU | NBPF11 | 148242151 | 3.7034 | 7.5047 | -1.4914 |
| CEU | NBPF11 | 148247151 | 2.1148 | 3.9229 | -1.2611 |
| CEU | NBPF11 | 148252151 | 1.4319 | 5.458  | -2.1047 |
| CEU | NBPF11 | 148257151 | 0.8916 | 2.729  | -1.7367 |
| CEU | NBPF11 | 148262151 | 0.0592 | 0.1706 | -0.6617 |
| CEU | NBPF11 | 148267151 | 0      | 0      | 0       |
| CEU | NBPF11 | 148272151 | 0      | 0      | 0       |
| CEU | NBPF11 | 148277151 | 0.0493 | 0.1706 | -0.7205 |
| CEU | NBPF11 | 148282151 | 0.0493 | 0.1706 | -0.7205 |
| CEU | NBPF11 | 148287151 | 0      | 0      | 0       |
| CEU | NBPF11 | 148292151 | 0      | 0      | 0       |
| CEU | NBPF11 | 148297151 | 0      | 0      | 0       |

## 2\_TajimasD\_data

|     |        |           |        |        |         |
|-----|--------|-----------|--------|--------|---------|
| CEU | NBPF11 | 148302151 | 0.1944 | 0.1706 | 0.1414  |
| CEU | NBPF11 | 148307151 | 0.2144 | 0.3411 | -0.5079 |
| CEU | NBPF11 | 148312151 | 0.02   | 0.1706 | -0.8946 |
| CEU | NBPF11 | 148317151 | 0.1276 | 0.3411 | -0.8559 |
| CEU | NBPF11 | 148322151 | 0.1276 | 0.3411 | -0.8559 |
| CEU | NBPF11 | 148327151 | 0.4877 | 0.1706 | 1.8836  |
| CEU | NBPF11 | 148332151 | 0.4877 | 0.1706 | 1.8836  |
| CEU | NBPF11 | 148337151 | 0.4787 | 0.5117 | -0.1035 |
| CEU | NBPF11 | 148342151 | 2.6232 | 5.1169 | -1.3803 |
| CEU | NBPF11 | 148347151 | 2.7543 | 6.6519 | -1.7064 |
| CEU | NBPF11 | 148352151 | 1.906  | 3.5818 | -1.263  |
| CEU | NBPF11 | 148357151 | 1.4265 | 2.5584 | -1.1276 |
| CEU | NBPF11 | 148362151 | 0.1303 | 1.0234 | -1.7746 |
| CEU | NBPF11 | 148367151 | 0      | 0      | 0       |
| CEU | NBPF11 | 148372151 | 0      | 0      | 0       |
| CEU | NBPF11 | 148377151 | 0      | 0      | 0       |
| CEU | NBPF11 | 148382151 | 0      | 0      | 0       |
| CEU | NBPF11 | 148387151 | 0      | 0      | 0       |
| CEU | NBPF11 | 148392151 | 0      | 0      | 0       |
| CEU | NBPF11 | 148397151 | 0      | 0      | 0       |
| CEU | NBPF11 | 148402151 | 0      | 0      | 0       |
| CEU | NBPF11 | 148407151 | 0      | 0      | 0       |
| CEU | NBPF11 | 148412151 | 0      | 0      | 0       |
| CEU | NBPF11 | 148417151 | 0      | 0      | 0       |
| CEU | NBPF11 | 148422151 | 0      | 0      | 0       |
| CEU | NBPF11 | 148427151 | 0      | 0      | 0       |
| CEU | NBPF11 | 148432151 | 0      | 0      | 0       |
| CEU | NBPF11 | 148437151 | 0      | 0      | 0       |
| CEU | NBPF11 | 148442151 | 0      | 0      | 0       |
| CEU | NBPF11 | 148447151 | 0      | 0      | 0       |
| CEU | NBPF11 | 148452151 | 0      | 0      | 0       |
| CEU | NBPF11 | 148457151 | 0      | 0      | 0       |
| CEU | NBPF11 | 148462151 | 0      | 0      | 0       |
| CEU | NBPF11 | 148467151 | 0      | 0      | 0       |
| CEU | NBPF11 | 148472151 | 0      | 0      | 0       |
| CEU | NBPF11 | 148477151 | 0      | 0      | 0       |
| CEU | NBPF11 | 148482151 | 0      | 0      | 0       |
| CEU | NBPF11 | 148487151 | 0      | 0      | 0       |
| CEU | NBPF11 | 148492151 | 0      | 0      | 0       |
| CEU | NBPF11 | 148497151 | 0      | 0      | 0       |
| CEU | NBPF11 | 148502151 | 0      | 0      | 0       |
| CEU | NBPF11 | 148507151 | 0.0202 | 0.3411 | -1.2864 |
| CEU | NBPF11 | 148512151 | 1.4613 | 2.5584 | -1.0929 |
| CEU | NBPF11 | 148517151 | 2.0616 | 4.0935 | -1.3663 |
| CEU | NBPF11 | 148522151 | 1.6597 | 4.9463 | -1.8743 |
| CEU | NBPF11 | 148527151 | 2.187  | 5.7991 | -1.789  |
| CEU | NBPF11 | 148532151 | 3.4632 | 7.1636 | -1.5148 |
| CEU | NBPF11 | 148537151 | 2.9243 | 6.4814 | -1.5943 |
| CEU | NBPF11 | 148542151 | 1.1181 | 4.7757 | -2.1512 |

## 2\_TajimasD\_data

|     |        |           |        |         |         |
|-----|--------|-----------|--------|---------|---------|
| CEU | NBPF11 | 148547151 | 4.1148 | 7.5047  | -1.33   |
| CEU | NBPF11 | 148552151 | 4.8571 | 8.5281  | -1.2809 |
| CEU | NBPF11 | 148557151 | 1.757  | 5.9697  | -2.0331 |
| CEU | NBPF11 | 148562151 | 1.6516 | 5.9697  | -2.084  |
| CEU | NBPF11 | 148567151 | 1.6164 | 5.6286  | -2.0408 |
| CEU | NBPF11 | 148572151 | 1.1934 | 3.0701  | -1.6098 |
| CEU | NBPF11 | 148577151 | 1.0188 | 2.3879  | -1.4418 |
| CEU | NBPF11 | 148582151 | 0.8153 | 1.7056  | -1.2194 |
| CEU | NBPF11 | 148587151 | 0.6003 | 1.5351  | -1.3861 |
| CEU | NBPF11 | 148592151 | 1.2569 | 3.2407  | -1.6267 |
| CEU | NBPF11 | 148597151 | 1.8044 | 3.5818  | -1.3396 |
| CEU | NBPF11 | 148602151 | 0.8281 | 2.5584  | -1.7237 |
| CEU | NBPF11 | 148607151 | 0.7671 | 2.3879  | -1.7069 |
| CEU | NBPF11 | 148612151 | 0.5772 | 1.3645  | -1.2737 |
| CEU | NBPF11 | 148617151 | 0.0101 | 0.1706  | -0.9534 |
| CEU | NBPF11 | 148622151 | 0.61   | 1.3645  | -1.2206 |
| CEU | NBPF11 | 148627151 | 2.7924 | 3.7524  | -0.6955 |
| CEU | NBPF11 | 148632151 | 2.8221 | 3.4112  | -0.4627 |
| CEU | NBPF11 | 148637151 | 1.6487 | 1.5351  | 0.1684  |
| CEU | NBPF11 | 148642151 | 1.5098 | 0.6822  | 2.1611  |
| CEU | NBPF11 | 148647151 | 0.8765 | 0.5117  | 1.1441  |
| CHB | NBPF11 | 147607151 | 0.3162 | 0.1694  | 0.8723  |
| CHB | NBPF11 | 147612151 | 0      | 0       | 0       |
| CHB | NBPF11 | 147617151 | 0      | 0       | 0       |
| CHB | NBPF11 | 147622151 | 0      | 0       | 0       |
| CHB | NBPF11 | 147627151 | 2.9212 | 2.8801  | 0.0371  |
| CHB | NBPF11 | 147632151 | 2.9212 | 2.8801  | 0.0371  |
| CHB | NBPF11 | 147637151 | 0      | 0       | 0       |
| CHB | NBPF11 | 147642151 | 0      | 0       | 0       |
| CHB | NBPF11 | 147647151 | 0      | 0       | 0       |
| CHB | NBPF11 | 147652151 | 0      | 0       | 0       |
| CHB | NBPF11 | 147657151 | 0      | 0       | 0       |
| CHB | NBPF11 | 147662151 | 0      | 0       | 0       |
| CHB | NBPF11 | 147667151 | 0.0097 | 0.1694  | -0.949  |
| CHB | NBPF11 | 147672151 | 0.0097 | 0.1694  | -0.949  |
| CHB | NBPF11 | 147677151 | 0      | 0       | 0       |
| CHB | NBPF11 | 147682151 | 0      | 0       | 0       |
| CHB | NBPF11 | 147687151 | 0      | 0       | 0       |
| CHB | NBPF11 | 147692151 | 0      | 0       | 0       |
| CHB | NBPF11 | 147697151 | 0.1765 | 0.3388  | -0.651  |
| CHB | NBPF11 | 147702151 | 1.1588 | 1.5247  | -0.5436 |
| CHB | NBPF11 | 147707151 | 1.4767 | 2.033   | -0.6634 |
| CHB | NBPF11 | 147712151 | 1.019  | 1.8636  | -1.0776 |
| CHB | NBPF11 | 147717151 | 2.3109 | 3.3883  | -0.8485 |
| CHB | NBPF11 | 147722151 | 3.6107 | 5.2519  | -0.8852 |
| CHB | NBPF11 | 147727151 | 3.8028 | 6.6072  | -1.2317 |
| CHB | NBPF11 | 147732151 | 7.321  | 11.6896 | -1.1329 |
| CHB | NBPF11 | 147737151 | 7.5978 | 13.7226 | -1.3651 |
| CHB | NBPF11 | 147742151 | 5.1196 | 10.3343 | -1.5179 |

## 2\_TajimasD\_data

|     |        |           |         |         |         |
|-----|--------|-----------|---------|---------|---------|
| CHB | NBPF11 | 147747151 | 6.4415  | 9.3178  | -0.922  |
| CHB | NBPF11 | 147752151 | 5.0571  | 6.4378  | -0.6208 |
| CHB | NBPF11 | 147757151 | 8.2789  | 13.045  | -1.1145 |
| CHB | NBPF11 | 147762151 | 7.9973  | 15.7556 | -1.5161 |
| CHB | NBPF11 | 147767151 | 3.7474  | 9.8261  | -1.8546 |
| CHB | NBPF11 | 147772151 | 3.8923  | 8.1319  | -1.541  |
| CHB | NBPF11 | 147777151 | 4.9075  | 7.6237  | -1.0474 |
| CHB | NBPF11 | 147782151 | 9.1081  | 8.979   | 0.0428  |
| CHB | NBPF11 | 147787151 | 8.7379  | 9.6567  | -0.2849 |
| CHB | NBPF11 | 147792151 | 7.7723  | 9.9955  | -0.6676 |
| CHB | NBPF11 | 147797151 | 8.1932  | 10.5037 | -0.6624 |
| CHB | NBPF11 | 147802151 | 8.9575  | 12.1979 | -0.8073 |
| CHB | NBPF11 | 147807151 | 8.8291  | 11.1814 | -0.636  |
| CHB | NBPF11 | 147812151 | 7.0293  | 9.4872  | -0.7748 |
| CHB | NBPF11 | 147817151 | 12.2157 | 12.7061 | -0.1176 |
| CHB | NBPF11 | 147822151 | 14.6745 | 15.925  | -0.2419 |
| CHB | NBPF11 | 147827151 | 8.419   | 11.8591 | -0.8801 |
| CHB | NBPF11 | 147832151 | 2.9185  | 4.913   | -1.1408 |
| CHB | NBPF11 | 147837151 | 0.7264  | 1.0165  | -0.5773 |
| CHB | NBPF11 | 147842151 | 0.8784  | 1.1859  | -0.5489 |
| CHB | NBPF11 | 147847151 | 0.9754  | 2.2024  | -1.3739 |
| CHB | NBPF11 | 147852151 | 0.5414  | 2.7106  | -2.0554 |
| CHB | NBPF11 | 147857151 | 0.6393  | 2.033   | -1.662  |
| CHB | NBPF11 | 147862151 | 0.42    | 0.6777  | -0.6737 |
| CHB | NBPF11 | 147867151 | 0.3448  | 0.1694  | 1.0423  |
| CHB | NBPF11 | 147872151 | 0.3448  | 0.1694  | 1.0423  |
| CHB | NBPF11 | 147877151 | 0       | 0       | 0       |
| CHB | NBPF11 | 147882151 | 0.0097  | 0.1694  | -0.949  |
| CHB | NBPF11 | 147887151 | 0.0097  | 0.1694  | -0.949  |
| CHB | NBPF11 | 147892151 | 0       | 0       | 0       |
| CHB | NBPF11 | 147897151 | 0.3992  | 0.3388  | 0.2423  |
| CHB | NBPF11 | 147902151 | 0.4184  | 0.5082  | -0.2819 |
| CHB | NBPF11 | 147907151 | 0.0192  | 0.1694  | -0.8925 |
| CHB | NBPF11 | 147912151 | 0.0097  | 0.1694  | -0.949  |
| CHB | NBPF11 | 147917151 | 1.9425  | 1.0165  | 1.8428  |
| CHB | NBPF11 | 147922151 | 2.953   | 1.6942  | 1.7276  |
| CHB | NBPF11 | 147927151 | 1.1045  | 1.1859  | -0.1453 |
| CHB | NBPF11 | 147932151 | 0.222   | 0.6777  | -1.1913 |
| CHB | NBPF11 | 147937151 | 0.1571  | 0.6777  | -1.361  |
| CHB | NBPF11 | 147942151 | 0.1215  | 0.5082  | -1.2139 |
| CHB | NBPF11 | 147947151 | 1.0912  | 1.1859  | -0.169  |
| CHB | NBPF11 | 147952151 | 3.0676  | 3.7271  | -0.4791 |
| CHB | NBPF11 | 147957151 | 2.8178  | 3.5577  | -0.5592 |
| CHB | NBPF11 | 147962151 | 0.7491  | 1.0165  | -0.5321 |
| CHB | NBPF11 | 147967151 | 0.5802  | 1.0165  | -0.8683 |
| CHB | NBPF11 | 147972151 | 0.9876  | 1.8636  | -1.1177 |
| CHB | NBPF11 | 147977151 | 0.4171  | 1.0165  | -1.1928 |
| CHB | NBPF11 | 147982151 | 0.0097  | 0.1694  | -0.949  |
| CHB | NBPF11 | 147987151 | 0.0834  | 0.3388  | -1.0245 |

## 2\_TajimasD\_data

|     |        |           |        |         |         |
|-----|--------|-----------|--------|---------|---------|
| CHB | NBPF11 | 147992151 | 2.0857 | 3.3883  | -1.0258 |
| CHB | NBPF11 | 147997151 | 7.06   | 7.6237  | -0.2174 |
| CHB | NBPF11 | 148002151 | 9.7843 | 10.6731 | -0.251  |
| CHB | NBPF11 | 148007151 | 6.4953 | 10.6731 | -1.18   |
| CHB | NBPF11 | 148012151 | 5.1274 | 8.3013  | -1.132  |
| CHB | NBPF11 | 148017151 | 6.4632 | 7.1154  | -0.2678 |
| CHB | NBPF11 | 148022151 | 8.7299 | 9.6567  | -0.2874 |
| CHB | NBPF11 | 148027151 | 5.6351 | 6.4378  | -0.3609 |
| CHB | NBPF11 | 148032151 | 0      | 0       | 0       |
| CHB | NBPF11 | 148037151 | 0      | 0       | 0       |
| CHB | NBPF11 | 148042151 | 0      | 0       | 0       |
| CHB | NBPF11 | 148047151 | 0      | 0       | 0       |
| CHB | NBPF11 | 148052151 | 0      | 0       | 0       |
| CHB | NBPF11 | 148057151 | 0      | 0       | 0       |
| CHB | NBPF11 | 148062151 | 0      | 0       | 0       |
| CHB | NBPF11 | 148067151 | 0      | 0       | 0       |
| CHB | NBPF11 | 148072151 | 0      | 0       | 0       |
| CHB | NBPF11 | 148077151 | 0      | 0       | 0       |
| CHB | NBPF11 | 148082151 | 0      | 0       | 0       |
| CHB | NBPF11 | 148087151 | 0      | 0       | 0       |
| CHB | NBPF11 | 148092151 | 0      | 0       | 0       |
| CHB | NBPF11 | 148097151 | 0      | 0       | 0       |
| CHB | NBPF11 | 148102151 | 0      | 0       | 0       |
| CHB | NBPF11 | 148107151 | 0      | 0       | 0       |
| CHB | NBPF11 | 148112151 | 0      | 0       | 0       |
| CHB | NBPF11 | 148117151 | 0      | 0       | 0       |
| CHB | NBPF11 | 148122151 | 0      | 0       | 0       |
| CHB | NBPF11 | 148127151 | 0      | 0       | 0       |
| CHB | NBPF11 | 148132151 | 0      | 0       | 0       |
| CHB | NBPF11 | 148137151 | 0      | 0       | 0       |
| CHB | NBPF11 | 148142151 | 0      | 0       | 0       |
| CHB | NBPF11 | 148147151 | 0      | 0       | 0       |
| CHB | NBPF11 | 148152151 | 0      | 0       | 0       |
| CHB | NBPF11 | 148157151 | 0      | 0       | 0       |
| CHB | NBPF11 | 148162151 | 0      | 0       | 0       |
| CHB | NBPF11 | 148167151 | 0      | 0       | 0       |
| CHB | NBPF11 | 148172151 | 0.0097 | 0.1694  | -0.949  |
| CHB | NBPF11 | 148177151 | 0.0777 | 1.3553  | -2.0706 |
| CHB | NBPF11 | 148182151 | 0.3265 | 2.3718  | -2.159  |
| CHB | NBPF11 | 148187151 | 0.6802 | 2.3718  | -1.7856 |
| CHB | NBPF11 | 148192151 | 0.6503 | 2.5412  | -1.8882 |
| CHB | NBPF11 | 148197151 | 0.2286 | 1.3553  | -1.826  |
| CHB | NBPF11 | 148202151 | 0.3644 | 1.0165  | -1.2977 |
| CHB | NBPF11 | 148207151 | 2.0602 | 2.8801  | -0.7392 |
| CHB | NBPF11 | 148212151 | 2.2656 | 2.8801  | -0.554  |
| CHB | NBPF11 | 148217151 | 1.0388 | 3.0495  | -1.7292 |
| CHB | NBPF11 | 148222151 | 0.7906 | 3.5577  | -2.0912 |
| CHB | NBPF11 | 148227151 | 0.8509 | 2.2024  | -1.5133 |
| CHB | NBPF11 | 148232151 | 1.1036 | 1.8636  | -0.9697 |

## 2\_TajimasD\_data

|     |        |           |        |        |         |
|-----|--------|-----------|--------|--------|---------|
| CHB | NBPF11 | 148237151 | 2.1642 | 6.946  | -2.0072 |
| CHB | NBPF11 | 148242151 | 3.1474 | 7.1154 | -1.6295 |
| CHB | NBPF11 | 148247151 | 2.2349 | 5.2519 | -1.6272 |
| CHB | NBPF11 | 148252151 | 1.7006 | 7.9625 | -2.3205 |
| CHB | NBPF11 | 148257151 | 1.023  | 4.066  | -2.052  |
| CHB | NBPF11 | 148262151 | 0      | 0      | 0       |
| CHB | NBPF11 | 148267151 | 0      | 0      | 0       |
| CHB | NBPF11 | 148272151 | 0      | 0      | 0       |
| CHB | NBPF11 | 148277151 | 0.0097 | 0.1694 | -0.949  |
| CHB | NBPF11 | 148282151 | 0.0097 | 0.1694 | -0.949  |
| CHB | NBPF11 | 148287151 | 0      | 0      | 0       |
| CHB | NBPF11 | 148292151 | 0      | 0      | 0       |
| CHB | NBPF11 | 148297151 | 0      | 0      | 0       |
| CHB | NBPF11 | 148302151 | 0.102  | 0.1694 | -0.4005 |
| CHB | NBPF11 | 148307151 | 0.23   | 0.3388 | -0.4364 |
| CHB | NBPF11 | 148312151 | 0.1279 | 0.1694 | -0.2466 |
| CHB | NBPF11 | 148317151 | 0.0383 | 0.1694 | -0.779  |
| CHB | NBPF11 | 148322151 | 0.0383 | 0.1694 | -0.779  |
| CHB | NBPF11 | 148327151 | 0.4647 | 0.1694 | 1.7547  |
| CHB | NBPF11 | 148332151 | 0.4647 | 0.1694 | 1.7547  |
| CHB | NBPF11 | 148337151 | 0.5848 | 1.1859 | -1.073  |
| CHB | NBPF11 | 148342151 | 3.0293 | 6.2684 | -1.4918 |
| CHB | NBPF11 | 148347151 | 2.944  | 8.3013 | -1.9107 |
| CHB | NBPF11 | 148352151 | 1.815  | 5.4213 | -1.891  |
| CHB | NBPF11 | 148357151 | 1.3834 | 3.3883 | -1.5789 |
| CHB | NBPF11 | 148362151 | 0.068  | 1.1859 | -1.9954 |
| CHB | NBPF11 | 148367151 | 0      | 0      | 0       |
| CHB | NBPF11 | 148372151 | 0      | 0      | 0       |
| CHB | NBPF11 | 148377151 | 0      | 0      | 0       |
| CHB | NBPF11 | 148382151 | 0      | 0      | 0       |
| CHB | NBPF11 | 148387151 | 0      | 0      | 0       |
| CHB | NBPF11 | 148392151 | 0      | 0      | 0       |
| CHB | NBPF11 | 148397151 | 0      | 0      | 0       |
| CHB | NBPF11 | 148402151 | 0      | 0      | 0       |
| CHB | NBPF11 | 148407151 | 0      | 0      | 0       |
| CHB | NBPF11 | 148412151 | 0      | 0      | 0       |
| CHB | NBPF11 | 148417151 | 0      | 0      | 0       |
| CHB | NBPF11 | 148422151 | 0      | 0      | 0       |
| CHB | NBPF11 | 148427151 | 0      | 0      | 0       |
| CHB | NBPF11 | 148432151 | 0      | 0      | 0       |
| CHB | NBPF11 | 148437151 | 0      | 0      | 0       |
| CHB | NBPF11 | 148442151 | 0      | 0      | 0       |
| CHB | NBPF11 | 148447151 | 0      | 0      | 0       |
| CHB | NBPF11 | 148452151 | 0      | 0      | 0       |
| CHB | NBPF11 | 148457151 | 0      | 0      | 0       |
| CHB | NBPF11 | 148462151 | 0      | 0      | 0       |
| CHB | NBPF11 | 148467151 | 0      | 0      | 0       |
| CHB | NBPF11 | 148472151 | 0      | 0      | 0       |
| CHB | NBPF11 | 148477151 | 0      | 0      | 0       |

## 2\_TajimasD\_data

|     |        |           |        |        |         |
|-----|--------|-----------|--------|--------|---------|
| CHB | NBPF11 | 148482151 | 0      | 0      | 0       |
| CHB | NBPF11 | 148487151 | 0      | 0      | 0       |
| CHB | NBPF11 | 148492151 | 0      | 0      | 0       |
| CHB | NBPF11 | 148497151 | 0      | 0      | 0       |
| CHB | NBPF11 | 148502151 | 0      | 0      | 0       |
| CHB | NBPF11 | 148507151 | 0.0674 | 0.3388 | -1.0887 |
| CHB | NBPF11 | 148512151 | 1.2404 | 4.7436 | -2.0665 |
| CHB | NBPF11 | 148517151 | 2.099  | 7.9625 | -2.1728 |
| CHB | NBPF11 | 148522151 | 1.8801 | 7.1154 | -2.15   |
| CHB | NBPF11 | 148527151 | 1.778  | 6.2684 | -2.0681 |
| CHB | NBPF11 | 148532151 | 3.1024 | 7.1154 | -1.648  |
| CHB | NBPF11 | 148537151 | 2.7868 | 6.7766 | -1.7127 |
| CHB | NBPF11 | 148542151 | 1.0238 | 4.913  | -2.2246 |
| CHB | NBPF11 | 148547151 | 3.8688 | 6.4378 | -1.1551 |
| CHB | NBPF11 | 148552151 | 4.5998 | 7.6237 | -1.1661 |
| CHB | NBPF11 | 148557151 | 1.902  | 8.6402 | -2.3162 |
| CHB | NBPF11 | 148562151 | 1.7959 | 9.9955 | -2.4622 |
| CHB | NBPF11 | 148567151 | 1.3678 | 7.1154 | -2.3604 |
| CHB | NBPF11 | 148572151 | 0.7836 | 2.7106 | -1.8259 |
| CHB | NBPF11 | 148577151 | 0.8414 | 1.1859 | -0.6149 |
| CHB | NBPF11 | 148582151 | 0.798  | 0.8471 | -0.1107 |
| CHB | NBPF11 | 148587151 | 0.6861 | 1.8636 | -1.5023 |
| CHB | NBPF11 | 148592151 | 0.9172 | 4.2354 | -2.1602 |
| CHB | NBPF11 | 148597151 | 1.3387 | 3.7271 | -1.7351 |
| CHB | NBPF11 | 148602151 | 0.9762 | 2.5412 | -1.5628 |
| CHB | NBPF11 | 148607151 | 0.9829 | 2.7106 | -1.6371 |
| CHB | NBPF11 | 148612151 | 0.6766 | 1.3553 | -1.1    |
| CHB | NBPF11 | 148617151 | 0.0946 | 0.5082 | -1.2984 |
| CHB | NBPF11 | 148622151 | 0.2774 | 0.6777 | -1.0465 |
| CHB | NBPF11 | 148627151 | 1.9048 | 2.8801 | -0.8793 |
| CHB | NBPF11 | 148632151 | 2.0691 | 3.5577 | -1.125  |
| CHB | NBPF11 | 148637151 | 1.392  | 1.5247 | -0.1971 |
| CHB | NBPF11 | 148642151 | 1.2878 | 1.1859 | 0.1819  |
| CHB | NBPF11 | 148647151 | 0.4203 | 1.0165 | -1.1865 |
| YRI | NBPF11 | 147607151 | 0.3319 | 0.1681 | 0.9737  |
| YRI | NBPF11 | 147612151 | 0      | 0      | 0       |
| YRI | NBPF11 | 147617151 | 0      | 0      | 0       |
| YRI | NBPF11 | 147622151 | 0.089  | 0.1681 | -0.4702 |
| YRI | NBPF11 | 147627151 | 4.1108 | 3.3612 | 0.5922  |
| YRI | NBPF11 | 147632151 | 4.0218 | 3.1932 | 0.6834  |
| YRI | NBPF11 | 147637151 | 0      | 0      | 0       |
| YRI | NBPF11 | 147642151 | 0      | 0      | 0       |
| YRI | NBPF11 | 147647151 | 0      | 0      | 0       |
| YRI | NBPF11 | 147652151 | 0      | 0      | 0       |
| YRI | NBPF11 | 147657151 | 0      | 0      | 0       |
| YRI | NBPF11 | 147662151 | 0      | 0      | 0       |
| YRI | NBPF11 | 147667151 | 0      | 0      | 0       |
| YRI | NBPF11 | 147672151 | 0      | 0      | 0       |
| YRI | NBPF11 | 147677151 | 0      | 0      | 0       |

## 2\_TajimasD\_data

|     |        |           |         |         |         |
|-----|--------|-----------|---------|---------|---------|
| YRI | NBPF11 | 147682151 | 0       | 0       | 0       |
| YRI | NBPF11 | 147687151 | 0       | 0       | 0       |
| YRI | NBPF11 | 147692151 | 0.574   | 0.5042  | 0.2194  |
| YRI | NBPF11 | 147697151 | 0.8193  | 1.6806  | -1.1849 |
| YRI | NBPF11 | 147702151 | 1.0571  | 2.689   | -1.5509 |
| YRI | NBPF11 | 147707151 | 1.6359  | 4.8738  | -1.8587 |
| YRI | NBPF11 | 147712151 | 3.2109  | 8.5712  | -1.8499 |
| YRI | NBPF11 | 147717151 | 5.3765  | 11.0921 | -1.5518 |
| YRI | NBPF11 | 147722151 | 5.9303  | 10.924  | -1.3754 |
| YRI | NBPF11 | 147727151 | 5.1547  | 10.2518 | -1.4897 |
| YRI | NBPF11 | 147732151 | 10.4686 | 17.8146 | -1.2721 |
| YRI | NBPF11 | 147737151 | 12.6803 | 20.3355 | -1.1672 |
| YRI | NBPF11 | 147742151 | 8.852   | 15.6298 | -1.3302 |
| YRI | NBPF11 | 147747151 | 9.3838  | 18.991  | -1.5645 |
| YRI | NBPF11 | 147752151 | 6.9894  | 14.7895 | -1.6136 |
| YRI | NBPF11 | 147757151 | 12.7813 | 17.3104 | -0.8062 |
| YRI | NBPF11 | 147762151 | 14.0438 | 21.512  | -1.0785 |
| YRI | NBPF11 | 147767151 | 7.9399  | 16.8062 | -1.6235 |
| YRI | NBPF11 | 147772151 | 6.9563  | 12.2685 | -1.3118 |
| YRI | NBPF11 | 147777151 | 6.9798  | 10.756  | -1.0552 |
| YRI | NBPF11 | 147782151 | 10.9094 | 15.2937 | -0.8785 |
| YRI | NBPF11 | 147787151 | 13.3085 | 15.2937 | -0.3978 |
| YRI | NBPF11 | 147792151 | 13.7021 | 13.613  | 0.0199  |
| YRI | NBPF11 | 147797151 | 12.3498 | 18.3188 | -1.0063 |
| YRI | NBPF11 | 147802151 | 16.5264 | 26.3858 | -1.1682 |
| YRI | NBPF11 | 147807151 | 19.6419 | 27.2261 | -0.8717 |
| YRI | NBPF11 | 147812151 | 18.2899 | 26.2177 | -0.9452 |
| YRI | NBPF11 | 147817151 | 23.4529 | 25.7135 | -0.2747 |
| YRI | NBPF11 | 147822151 | 24.3774 | 22.3523 | 0.2818  |
| YRI | NBPF11 | 147827151 | 16.4326 | 18.4868 | -0.3433 |
| YRI | NBPF11 | 147832151 | 7.0854  | 9.5795  | -0.7765 |
| YRI | NBPF11 | 147837151 | 1.6243  | 1.8487  | -0.287  |
| YRI | NBPF11 | 147842151 | 1.3219  | 1.6806  | -0.4935 |
| YRI | NBPF11 | 147847151 | 2.3739  | 2.8571  | -0.437  |
| YRI | NBPF11 | 147852151 | 4.3217  | 4.8738  | -0.3169 |
| YRI | NBPF11 | 147857151 | 4.2474  | 4.2016  | 0.0299  |
| YRI | NBPF11 | 147862151 | 1.5662  | 1.3445  | 0.3601  |
| YRI | NBPF11 | 147867151 | 0.246   | 0.1681  | 0.4631  |
| YRI | NBPF11 | 147872151 | 0.2553  | 0.3361  | -0.3244 |
| YRI | NBPF11 | 147877151 | 0.0093  | 0.1681  | -0.944  |
| YRI | NBPF11 | 147882151 | 0.089   | 0.1681  | -0.4702 |
| YRI | NBPF11 | 147887151 | 0.089   | 0.1681  | -0.4702 |
| YRI | NBPF11 | 147892151 | 0       | 0       | 0       |
| YRI | NBPF11 | 147897151 | 0.4308  | 0.3361  | 0.3802  |
| YRI | NBPF11 | 147902151 | 0.4668  | 0.5042  | -0.1175 |
| YRI | NBPF11 | 147907151 | 0.1099  | 1.1764  | -1.9075 |
| YRI | NBPF11 | 147912151 | 0.5647  | 1.6806  | -1.5351 |
| YRI | NBPF11 | 147917151 | 1.6988  | 1.8487  | -0.1917 |
| YRI | NBPF11 | 147922151 | 2.3333  | 1.8487  | 0.6198  |



## 2\_TajimasD\_data

|     |        |           |         |         |         |
|-----|--------|-----------|---------|---------|---------|
| YRI | NBPF11 | 147927151 | 1.479   | 1.0084  | 0.9382  |
| YRI | NBPF11 | 147932151 | 0.4836  | 0.5042  | -0.0647 |
| YRI | NBPF11 | 147937151 | 0.2442  | 0.3361  | -0.3689 |
| YRI | NBPF11 | 147942151 | 0.5838  | 0.5042  | 0.2502  |
| YRI | NBPF11 | 147947151 | 1.4998  | 1.8487  | -0.4463 |
| YRI | NBPF11 | 147952151 | 5.7155  | 5.378   | 0.1776  |
| YRI | NBPF11 | 147957151 | 5.5659  | 5.7141  | -0.0739 |
| YRI | NBPF11 | 147962151 | 1.0029  | 2.0167  | -1.2122 |
| YRI | NBPF11 | 147967151 | 0.6264  | 0.6722  | -0.1199 |
| YRI | NBPF11 | 147972151 | 1.6012  | 1.6806  | -0.1092 |
| YRI | NBPF11 | 147977151 | 1.0971  | 1.1764  | -0.1418 |
| YRI | NBPF11 | 147982151 | 0       | 0       | 0       |
| YRI | NBPF11 | 147987151 | 0       | 0       | 0       |
| YRI | NBPF11 | 147992151 | 1.7907  | 2.689   | -0.8537 |
| YRI | NBPF11 | 147997151 | 6.9843  | 8.7392  | -0.5949 |
| YRI | NBPF11 | 148002151 | 14.2284 | 13.2769 | 0.2181  |
| YRI | NBPF11 | 148007151 | 12.0665 | 12.7727 | -0.1679 |
| YRI | NBPF11 | 148012151 | 8.1835  | 10.0837 | -0.564  |
| YRI | NBPF11 | 148017151 | 9.2475  | 9.0754  | 0.0563  |
| YRI | NBPF11 | 148022151 | 11.0404 | 11.4282 | -0.1024 |
| YRI | NBPF11 | 148027151 | 6.9447  | 6.8906  | 0.0228  |
| YRI | NBPF11 | 148032151 | 0       | 0       | 0       |
| YRI | NBPF11 | 148037151 | 0       | 0       | 0       |
| YRI | NBPF11 | 148042151 | 0       | 0       | 0       |
| YRI | NBPF11 | 148047151 | 0       | 0       | 0       |
| YRI | NBPF11 | 148052151 | 0       | 0       | 0       |
| YRI | NBPF11 | 148057151 | 0       | 0       | 0       |
| YRI | NBPF11 | 148062151 | 0       | 0       | 0       |
| YRI | NBPF11 | 148067151 | 0       | 0       | 0       |
| YRI | NBPF11 | 148072151 | 0       | 0       | 0       |
| YRI | NBPF11 | 148077151 | 0       | 0       | 0       |
| YRI | NBPF11 | 148082151 | 0       | 0       | 0       |
| YRI | NBPF11 | 148087151 | 0       | 0       | 0       |
| YRI | NBPF11 | 148092151 | 0       | 0       | 0       |
| YRI | NBPF11 | 148097151 | 0       | 0       | 0       |
| YRI | NBPF11 | 148102151 | 0       | 0       | 0       |
| YRI | NBPF11 | 148107151 | 0       | 0       | 0       |
| YRI | NBPF11 | 148112151 | 0       | 0       | 0       |
| YRI | NBPF11 | 148117151 | 0       | 0       | 0       |
| YRI | NBPF11 | 148122151 | 0       | 0       | 0       |
| YRI | NBPF11 | 148127151 | 0       | 0       | 0       |
| YRI | NBPF11 | 148132151 | 0       | 0       | 0       |
| YRI | NBPF11 | 148137151 | 0       | 0       | 0       |
| YRI | NBPF11 | 148142151 | 0       | 0       | 0       |
| YRI | NBPF11 | 148147151 | 0       | 0       | 0       |
| YRI | NBPF11 | 148152151 | 0       | 0       | 0       |
| YRI | NBPF11 | 148157151 | 0       | 0       | 0       |
| YRI | NBPF11 | 148162151 | 0       | 0       | 0       |
| YRI | NBPF11 | 148167151 | 0       | 0       | 0       |

## 2\_TajimasD\_data

|     |        |           |        |         |         |
|-----|--------|-----------|--------|---------|---------|
| YRI | NBPF11 | 148172151 | 0.0549 | 0.3361  | -1.1289 |
| YRI | NBPF11 | 148177151 | 0.3149 | 1.1764  | -1.5408 |
| YRI | NBPF11 | 148182151 | 0.8728 | 2.5209  | -1.6505 |
| YRI | NBPF11 | 148187151 | 1.058  | 2.689   | -1.55   |
| YRI | NBPF11 | 148192151 | 0.9785 | 3.6974  | -1.9817 |
| YRI | NBPF11 | 148197151 | 0.5332 | 2.689   | -2.0488 |
| YRI | NBPF11 | 148202151 | 0.0554 | 0.8403  | -1.7728 |
| YRI | NBPF11 | 148207151 | 1.6634 | 3.5293  | -1.4147 |
| YRI | NBPF11 | 148212151 | 2.1785 | 4.0335  | -1.2551 |
| YRI | NBPF11 | 148217151 | 0.9457 | 2.8571  | -1.7286 |
| YRI | NBPF11 | 148222151 | 1.164  | 3.0251  | -1.6055 |
| YRI | NBPF11 | 148227151 | 1.4765 | 2.3529  | -0.9277 |
| YRI | NBPF11 | 148232151 | 2.2105 | 2.689   | -0.4547 |
| YRI | NBPF11 | 148237151 | 5.6002 | 10.4199 | -1.3874 |
| YRI | NBPF11 | 148242151 | 5.5393 | 11.7644 | -1.5993 |
| YRI | NBPF11 | 148247151 | 2.2663 | 7.2267  | -2.0016 |
| YRI | NBPF11 | 148252151 | 2.4911 | 7.3947  | -1.9377 |
| YRI | NBPF11 | 148257151 | 1.7052 | 3.6974  | -1.4521 |
| YRI | NBPF11 | 148262151 | 0.0185 | 0.3361  | -1.275  |
| YRI | NBPF11 | 148267151 | 0      | 0       | 0       |
| YRI | NBPF11 | 148272151 | 0      | 0       | 0       |
| YRI | NBPF11 | 148277151 | 0.1761 | 0.1681  | 0.0476  |
| YRI | NBPF11 | 148282151 | 0.1761 | 0.1681  | 0.0476  |
| YRI | NBPF11 | 148287151 | 0      | 0       | 0       |
| YRI | NBPF11 | 148292151 | 0      | 0       | 0       |
| YRI | NBPF11 | 148297151 | 0      | 0       | 0       |
| YRI | NBPF11 | 148302151 | 0.2276 | 0.1681  | 0.3537  |
| YRI | NBPF11 | 148307151 | 0.6734 | 0.3361  | 1.3541  |
| YRI | NBPF11 | 148312151 | 0.4458 | 0.1681  | 1.6508  |
| YRI | NBPF11 | 148317151 | 0.0273 | 0.1681  | -0.837  |
| YRI | NBPF11 | 148322151 | 0.0273 | 0.1681  | -0.837  |
| YRI | NBPF11 | 148327151 | 0.4907 | 0.5042  | -0.0424 |
| YRI | NBPF11 | 148332151 | 0.4907 | 0.5042  | -0.0424 |
| YRI | NBPF11 | 148337151 | 0.6931 | 1.3445  | -1.058  |
| YRI | NBPF11 | 148342151 | 3.8834 | 6.8906  | -1.2671 |
| YRI | NBPF11 | 148347151 | 4.999  | 9.4115  | -1.3965 |
| YRI | NBPF11 | 148352151 | 3.3055 | 6.5544  | -1.4324 |
| YRI | NBPF11 | 148357151 | 2.1495 | 4.5377  | -1.4593 |
| YRI | NBPF11 | 148362151 | 0.6528 | 1.8487  | -1.5297 |
| YRI | NBPF11 | 148367151 | 0      | 0       | 0       |
| YRI | NBPF11 | 148372151 | 0      | 0       | 0       |
| YRI | NBPF11 | 148377151 | 0      | 0       | 0       |
| YRI | NBPF11 | 148382151 | 0      | 0       | 0       |
| YRI | NBPF11 | 148387151 | 0      | 0       | 0       |
| YRI | NBPF11 | 148392151 | 0      | 0       | 0       |
| YRI | NBPF11 | 148397151 | 0      | 0       | 0       |
| YRI | NBPF11 | 148402151 | 0      | 0       | 0       |
| YRI | NBPF11 | 148407151 | 0      | 0       | 0       |
| YRI | NBPF11 | 148412151 | 0      | 0       | 0       |

## 2\_TajimasD\_data

|     |        |           |        |         |         |
|-----|--------|-----------|--------|---------|---------|
| YRI | NBPF11 | 148417151 | 0      | 0       | 0       |
| YRI | NBPF11 | 148422151 | 0      | 0       | 0       |
| YRI | NBPF11 | 148427151 | 0      | 0       | 0       |
| YRI | NBPF11 | 148432151 | 0      | 0       | 0       |
| YRI | NBPF11 | 148437151 | 0      | 0       | 0       |
| YRI | NBPF11 | 148442151 | 0      | 0       | 0       |
| YRI | NBPF11 | 148447151 | 0      | 0       | 0       |
| YRI | NBPF11 | 148452151 | 0      | 0       | 0       |
| YRI | NBPF11 | 148457151 | 0      | 0       | 0       |
| YRI | NBPF11 | 148462151 | 0      | 0       | 0       |
| YRI | NBPF11 | 148467151 | 0      | 0       | 0       |
| YRI | NBPF11 | 148472151 | 0      | 0       | 0       |
| YRI | NBPF11 | 148477151 | 0      | 0       | 0       |
| YRI | NBPF11 | 148482151 | 0      | 0       | 0       |
| YRI | NBPF11 | 148487151 | 0      | 0       | 0       |
| YRI | NBPF11 | 148492151 | 0      | 0       | 0       |
| YRI | NBPF11 | 148497151 | 0      | 0       | 0       |
| YRI | NBPF11 | 148502151 | 0      | 0       | 0       |
| YRI | NBPF11 | 148507151 | 0.0369 | 0.3361  | -1.2012 |
| YRI | NBPF11 | 148512151 | 1.878  | 4.8738  | -1.7197 |
| YRI | NBPF11 | 148517151 | 5.7485 | 9.7476  | -1.2251 |
| YRI | NBPF11 | 148522151 | 6.2555 | 9.7476  | -1.0698 |
| YRI | NBPF11 | 148527151 | 4.4836 | 8.5712  | -1.4106 |
| YRI | NBPF11 | 148532151 | 6.3638 | 8.7392  | -0.8052 |
| YRI | NBPF11 | 148537151 | 6.1938 | 9.2434  | -0.9814 |
| YRI | NBPF11 | 148542151 | 3.9817 | 8.7392  | -1.6127 |
| YRI | NBPF11 | 148547151 | 7.1161 | 9.5795  | -0.7669 |
| YRI | NBPF11 | 148552151 | 7.5005 | 10.756  | -0.9097 |
| YRI | NBPF11 | 148557151 | 5.4438 | 11.2602 | -1.5571 |
| YRI | NBPF11 | 148562151 | 7.985  | 12.9408 | -1.1637 |
| YRI | NBPF11 | 148567151 | 6.4323 | 10.756  | -1.2082 |
| YRI | NBPF11 | 148572151 | 2.8151 | 5.7141  | -1.4456 |
| YRI | NBPF11 | 148577151 | 1.9312 | 3.1932  | -1.0408 |
| YRI | NBPF11 | 148582151 | 1.4171 | 2.3529  | -0.9906 |
| YRI | NBPF11 | 148587151 | 0.8936 | 2.0167  | -1.3428 |
| YRI | NBPF11 | 148592151 | 1.5314 | 4.3696  | -1.7921 |
| YRI | NBPF11 | 148597151 | 2.0051 | 4.7057  | -1.5986 |
| YRI | NBPF11 | 148602151 | 0.9855 | 3.3612  | -1.8769 |
| YRI | NBPF11 | 148607151 | 0.5664 | 3.5293  | -2.2465 |
| YRI | NBPF11 | 148612151 | 0.1562 | 1.5126  | -2.0197 |
| YRI | NBPF11 | 148617151 | 0.2185 | 0.6722  | -1.1878 |
| YRI | NBPF11 | 148622151 | 0.7157 | 2.5209  | -1.8078 |
| YRI | NBPF11 | 148627151 | 2.2519 | 5.0419  | -1.5545 |
| YRI | NBPF11 | 148632151 | 1.8997 | 4.0335  | -1.4438 |
| YRI | NBPF11 | 148637151 | 1.1091 | 1.3445  | -0.3823 |
| YRI | NBPF11 | 148642151 | 1.2523 | 1.0084  | 0.4863  |
| YRI | NBPF11 | 148647151 | 0.4683 | 0.8403  | -0.8402 |
| CEU | NBPF16 | 143926390 | 1.7578 | 3.4112  | -1.2986 |
| CEU | NBPF16 | 143931390 | 1.1676 | 2.729   | -1.4759 |

## 2\_TajimasD\_data

|     |        |           |        |        |         |
|-----|--------|-----------|--------|--------|---------|
| CEU | NBPF16 | 143936390 | 1.1132 | 1.3645 | -0.4065 |
| CEU | NBPF16 | 143941390 | 1.5984 | 1.8762 | -0.3537 |
| CEU | NBPF16 | 143946390 | 0.7825 | 2.729  | -1.8399 |
| CEU | NBPF16 | 143951390 | 0.317  | 2.5584 | -2.2328 |
| CEU | NBPF16 | 143956390 | 0.1389 | 1.0234 | -1.7575 |
| CEU | NBPF16 | 143961390 | 0.1301 | 1.1939 | -1.8957 |
| CEU | NBPF16 | 143966390 | 0.6269 | 1.7056 | -1.4774 |
| CEU | NBPF16 | 143971390 | 0.8658 | 1.3645 | -0.8068 |
| CEU | NBPF16 | 143976390 | 0.3696 | 1.0234 | -1.2991 |
| CEU | NBPF16 | 143981390 | 2.1229 | 1.7056 | 0.5715  |
| CEU | NBPF16 | 143986390 | 3.0812 | 2.5584 | 0.5208  |
| CEU | NBPF16 | 143991390 | 2.1909 | 3.0701 | -0.7542 |
| CEU | NBPF16 | 143996390 | 3.0777 | 3.7524 | -0.4888 |
| CEU | NBPF16 | 144001390 | 2.2078 | 3.2407 | -0.847  |
| CEU | NBPF16 | 144006390 | 4.4382 | 4.6052 | -0.1014 |
| CEU | NBPF16 | 144011390 | 7.9764 | 7.5047 | 0.1851  |
| CEU | NBPF16 | 144016390 | 4.8421 | 6.6519 | -0.7924 |
| CEU | NBPF16 | 144021390 | 2.8314 | 4.0935 | -0.8487 |
| CEU | NBPF16 | 144026390 | 4.2237 | 4.0935 | 0.0876  |
| CEU | NBPF16 | 144031390 | 2.4941 | 3.9229 | -0.9965 |
| CEU | NBPF16 | 144036390 | 0.3863 | 2.5584 | -2.1638 |
| CEU | NBPF16 | 144041390 | 3.2962 | 3.9229 | -0.4371 |
| CEU | NBPF16 | 144046390 | 3.6842 | 4.6052 | -0.5592 |
| CEU | NBPF16 | 144051390 | 1.2847 | 2.729  | -1.3652 |
| CEU | NBPF16 | 144056390 | 0.7922 | 2.5584 | -1.7594 |
| CEU | NBPF16 | 144061390 | 1.2542 | 3.0701 | -1.5577 |
| CEU | NBPF16 | 144066390 | 2.1618 | 2.729  | -0.5361 |
| CEU | NBPF16 | 144071390 | 1.4995 | 1.7056 | -0.2823 |
| CEU | NBPF16 | 144076390 | 0.905  | 1.1939 | -0.5148 |
| CEU | NBPF16 | 144081390 | 0.5949 | 1.7056 | -1.5212 |
| CEU | NBPF16 | 144086390 | 0.1903 | 1.5351 | -1.9941 |
| CEU | NBPF16 | 144091390 | 0.1301 | 1.0234 | -1.775  |
| CEU | NBPF16 | 144096390 | 0.0505 | 0.5117 | -1.4464 |
| CEU | NBPF16 | 144101390 | 0      | 0      | 0       |
| CEU | NBPF16 | 144106390 | 0      | 0      | 0       |
| CEU | NBPF16 | 144111390 | 0      | 0      | 0       |
| CEU | NBPF16 | 144116390 | 0      | 0      | 0       |
| CEU | NBPF16 | 144121390 | 0      | 0      | 0       |
| CEU | NBPF16 | 144126390 | 0      | 0      | 0       |
| CEU | NBPF16 | 144131390 | 0      | 0      | 0       |
| CEU | NBPF16 | 144136390 | 0      | 0      | 0       |
| CEU | NBPF16 | 144141390 | 0.02   | 0.1706 | -0.8946 |
| CEU | NBPF16 | 144146390 | 0.02   | 0.1706 | -0.8946 |
| CEU | NBPF16 | 144151390 | 0      | 0      | 0       |
| CEU | NBPF16 | 144156390 | 0.0202 | 0.3411 | -1.2864 |
| CEU | NBPF16 | 144161390 | 0.2325 | 1.0234 | -1.5716 |
| CEU | NBPF16 | 144166390 | 1.2307 | 1.3645 | -0.2165 |
| CEU | NBPF16 | 144171390 | 1.0183 | 0.6822 | 0.8777  |
| CEU | NBPF16 | 144176390 | 0.4945 | 0.1706 | 1.924   |

## 2\_TajimasD\_data

|     |        |           |        |        |         |
|-----|--------|-----------|--------|--------|---------|
| CEU | NBPF16 | 144181390 | 0.4945 | 0.1706 | 1.924   |
| CEU | NBPF16 | 144186390 | 0      | 0      | 0       |
| CEU | NBPF16 | 144191390 | 0      | 0      | 0       |
| CEU | NBPF16 | 144196390 | 0.0594 | 0.3411 | -1.1293 |
| CEU | NBPF16 | 144201390 | 0.0594 | 0.3411 | -1.1293 |
| CEU | NBPF16 | 144206390 | 0      | 0      | 0       |
| CEU | NBPF16 | 144211390 | 0      | 0      | 0       |
| CEU | NBPF16 | 144216390 | 0.8332 | 1.1939 | -0.6428 |
| CEU | NBPF16 | 144221390 | 0.8433 | 1.3645 | -0.8432 |
| CEU | NBPF16 | 144226390 | 0.0101 | 0.1706 | -0.9534 |
| CEU | NBPF16 | 144231390 | 0      | 0      | 0       |
| CEU | NBPF16 | 144236390 | 0      | 0      | 0       |
| CEU | NBPF16 | 144241390 | 0      | 0      | 0       |
| CEU | NBPF16 | 144246390 | 0      | 0      | 0       |
| CEU | NBPF16 | 144251390 | 0      | 0      | 0       |
| CEU | NBPF16 | 144256390 | 0      | 0      | 0       |
| CEU | NBPF16 | 144261390 | 0      | 0      | 0       |
| CEU | NBPF16 | 144266390 | 0      | 0      | 0       |
| CEU | NBPF16 | 144271390 | 0.4686 | 0.3411 | 0.5111  |
| CEU | NBPF16 | 144276390 | 0.4686 | 0.3411 | 0.5111  |
| CEU | NBPF16 | 144281390 | 0.4585 | 0.1706 | 1.7102  |
| CEU | NBPF16 | 144286390 | 0.4585 | 0.1706 | 1.7102  |
| CEU | NBPF16 | 144291390 | 0      | 0      | 0       |
| CEU | NBPF16 | 144296390 | 0      | 0      | 0       |
| CEU | NBPF16 | 144301390 | 1.4576 | 0.8528 | 1.362   |
| CEU | NBPF16 | 144306390 | 1.4576 | 0.8528 | 1.362   |
| CEU | NBPF16 | 144311390 | 0      | 0      | 0       |
| CEU | NBPF16 | 144316390 | 0.1876 | 0.6822 | -1.2915 |
| CEU | NBPF16 | 144321390 | 0.2179 | 1.0234 | -1.6006 |
| CEU | NBPF16 | 144326390 | 0.0606 | 0.8528 | -1.784  |
| CEU | NBPF16 | 144331390 | 0.0303 | 0.5117 | -1.5098 |
| CEU | NBPF16 | 144336390 | 0.0202 | 0.3411 | -1.2864 |
| CEU | NBPF16 | 144341390 | 0.0891 | 0.5117 | -1.3254 |
| CEU | NBPF16 | 144346390 | 0.0689 | 0.1706 | -0.6041 |
| CEU | NBPF16 | 144351390 | 0      | 0      | 0       |
| CEU | NBPF16 | 144356390 | 0      | 0      | 0       |
| CEU | NBPF16 | 144361390 | 0.2591 | 0.5117 | -0.7922 |
| CEU | NBPF16 | 144366390 | 0.2591 | 0.5117 | -0.7922 |
| CEU | NBPF16 | 144371390 | 0      | 0      | 0       |
| CEU | NBPF16 | 144376390 | 0      | 0      | 0       |
| CEU | NBPF16 | 144381390 | 0      | 0      | 0       |
| CEU | NBPF16 | 144386390 | 0      | 0      | 0       |
| CEU | NBPF16 | 144391390 | 0      | 0      | 0       |
| CEU | NBPF16 | 144396390 | 0      | 0      | 0       |
| CEU | NBPF16 | 144401390 | 0      | 0      | 0       |
| CEU | NBPF16 | 144406390 | 0      | 0      | 0       |
| CEU | NBPF16 | 144411390 | 0      | 0      | 0       |
| CEU | NBPF16 | 144416390 | 0      | 0      | 0       |
| CEU | NBPF16 | 144421390 | 0      | 0      | 0       |

## 2\_TajimasD\_data

|     |        |           |         |         |         |
|-----|--------|-----------|---------|---------|---------|
| CEU | NBPF16 | 144426390 | 0       | 0       | 0       |
| CEU | NBPF16 | 144431390 | 0       | 0       | 0       |
| CEU | NBPF16 | 144436390 | 0       | 0       | 0       |
| CEU | NBPF16 | 144441390 | 0       | 0       | 0       |
| CEU | NBPF16 | 144446390 | 0       | 0       | 0       |
| CEU | NBPF16 | 144451390 | 0.9093  | 0.5117  | 1.247   |
| CEU | NBPF16 | 144456390 | 0.9093  | 0.5117  | 1.247   |
| CEU | NBPF16 | 144461390 | 0.483   | 0.3411  | 0.5688  |
| CEU | NBPF16 | 144466390 | 1.4102  | 1.7056  | -0.4046 |
| CEU | NBPF16 | 144471390 | 2.2754  | 2.5584  | -0.2819 |
| CEU | NBPF16 | 144476390 | 2.5958  | 2.729   | -0.1259 |
| CEU | NBPF16 | 144481390 | 1.2476  | 1.5351  | -0.4263 |
| CEU | NBPF16 | 144486390 | 0.0202  | 0.1706  | -0.8934 |
| CEU | NBPF16 | 144491390 | 0.0202  | 0.1706  | -0.8934 |
| CEU | NBPF16 | 144496390 | 0       | 0       | 0       |
| CEU | NBPF16 | 144501390 | 0.0493  | 0.1706  | -0.7205 |
| CEU | NBPF16 | 144506390 | 0.3092  | 1.0234  | -1.4191 |
| CEU | NBPF16 | 144511390 | 0.9685  | 1.7056  | -1.0095 |
| CEU | NBPF16 | 144516390 | 5.4628  | 3.7524  | 1.2391  |
| CEU | NBPF16 | 144521390 | 9.4407  | 7.3342  | 0.844   |
| CEU | NBPF16 | 144526390 | 12.9931 | 10.5749 | 0.6909  |
| CEU | NBPF16 | 144531390 | 8.8913  | 8.187   | 0.2552  |
| CEU | NBPF16 | 144536390 | 0.6947  | 3.0701  | -2.0376 |
| CEU | NBPF16 | 144541390 | 1.6712  | 3.9229  | -1.5705 |
| CEU | NBPF16 | 144546390 | 3.3655  | 6.1402  | -1.3057 |
| CEU | NBPF16 | 144551390 | 4.498   | 7.3342  | -1.1364 |
| CEU | NBPF16 | 144556390 | 6.2112  | 7.8459  | -0.6158 |
| CEU | NBPF16 | 144561390 | 8.049   | 8.187   | -0.05   |
| CEU | NBPF16 | 144566390 | 10.3847 | 9.0398  | 0.4447  |
| CEU | NBPF16 | 144571390 | 8.813   | 6.8225  | 0.8517  |
| CEU | NBPF16 | 144576390 | 9.008   | 6.8225  | 0.9352  |
| CEU | NBPF16 | 144581390 | 9.0183  | 7.3342  | 0.6748  |
| CEU | NBPF16 | 144586390 | 6.9627  | 6.3108  | 0.2993  |
| CEU | NBPF16 | 144591390 | 9.0066  | 8.3576  | 0.2307  |
| CEU | NBPF16 | 144596390 | 8.2948  | 8.187   | 0.0391  |
| CEU | NBPF16 | 144601390 | 7.7747  | 7.5047  | 0.1059  |
| CEU | NBPF16 | 144606390 | 8.8668  | 8.0164  | 0.3141  |
| CEU | NBPF16 | 144611390 | 11.4036 | 9.2104  | 0.7127  |
| CEU | NBPF16 | 144616390 | 13.4602 | 10.5749 | 0.8244  |
| CEU | NBPF16 | 144621390 | 7.5412  | 7.5047  | 0.0143  |
| CEU | NBPF16 | 144626390 | 1.1117  | 2.2173  | -1.2352 |
| CEU | NBPF16 | 144631390 | 0       | 0       | 0       |
| CEU | NBPF16 | 144636390 | 0       | 0       | 0       |
| CEU | NBPF16 | 144641390 | 0       | 0       | 0       |
| CEU | NBPF16 | 144646390 | 0       | 0       | 0       |
| CEU | NBPF16 | 144651390 | 0       | 0       | 0       |
| CEU | NBPF16 | 144656390 | 0       | 0       | 0       |
| CEU | NBPF16 | 144661390 | 0       | 0       | 0       |
| CEU | NBPF16 | 144666390 | 0       | 0       | 0       |

## 2\_TajimasD\_data

|     |        |           |         |         |         |
|-----|--------|-----------|---------|---------|---------|
| CEU | NBPF16 | 144671390 | 0.7355  | 1.7056  | -1.3287 |
| CEU | NBPF16 | 144676390 | 1.216   | 4.7757  | -2.0936 |
| CEU | NBPF16 | 144681390 | 1.2228  | 4.0935  | -1.9303 |
| CEU | NBPF16 | 144686390 | 2.8415  | 3.9229  | -0.7542 |
| CEU | NBPF16 | 144691390 | 2.9559  | 3.7524  | -0.577  |
| CEU | NBPF16 | 144696390 | 2.2517  | 3.5818  | -1.0025 |
| CEU | NBPF16 | 144701390 | 2.5869  | 6.3108  | -1.7097 |
| CEU | NBPF16 | 144706390 | 1.2828  | 4.9463  | -2.0893 |
| CEU | NBPF16 | 144711390 | 0.0909  | 1.3645  | -2.0604 |
| CEU | NBPF16 | 144716390 | 0       | 0       | 0       |
| CEU | NBPF16 | 144721390 | 0       | 0       | 0       |
| CEU | NBPF16 | 144726390 | 0       | 0       | 0       |
| CEU | NBPF16 | 144731390 | 0       | 0       | 0       |
| CEU | NBPF16 | 144736390 | 0       | 0       | 0       |
| CEU | NBPF16 | 144741390 | 0       | 0       | 0       |
| CEU | NBPF16 | 144746390 | 0       | 0       | 0       |
| CEU | NBPF16 | 144751390 | 0       | 0       | 0       |
| CEU | NBPF16 | 144756390 | 0       | 0       | 0       |
| CEU | NBPF16 | 144761390 | 0       | 0       | 0       |
| CEU | NBPF16 | 144766390 | 0       | 0       | 0       |
| CEU | NBPF16 | 144771390 | 0       | 0       | 0       |
| CEU | NBPF16 | 144776390 | 0       | 0       | 0       |
| CEU | NBPF16 | 144781390 | 0       | 0       | 0       |
| CEU | NBPF16 | 144786390 | 0       | 0       | 0       |
| CEU | NBPF16 | 144791390 | 0       | 0       | 0       |
| CEU | NBPF16 | 144796390 | 0       | 0       | 0       |
| CEU | NBPF16 | 144801390 | 0       | 0       | 0       |
| CEU | NBPF16 | 144806390 | 0.9598  | 0.8528  | 0.241   |
| CEU | NBPF16 | 144811390 | 6.7809  | 8.5281  | -0.6096 |
| CEU | NBPF16 | 144816390 | 7.2779  | 11.4277 | -1.1025 |
| CEU | NBPF16 | 144821390 | 5.7215  | 8.8692  | -1.0592 |
| CEU | NBPF16 | 144826390 | 6.5879  | 7.8459  | -0.4739 |
| CEU | NBPF16 | 144831390 | 3.3309  | 4.6052  | -0.7737 |
| CEU | NBPF16 | 144836390 | 3.1255  | 6.4814  | -1.5042 |
| CEU | NBPF16 | 144841390 | 3.3634  | 7.5047  | -1.6248 |
| CEU | NBPF16 | 144846390 | 5.4442  | 5.9697  | -0.2536 |
| CEU | NBPF16 | 144851390 | 11.2488 | 8.5281  | 0.9493  |
| CEU | NBPF16 | 144856390 | 12.7722 | 10.916  | 0.5148  |
| CEU | NBPF16 | 144861390 | 9.2342  | 9.2104  | 0.0077  |
| CEU | NBPF16 | 144866390 | 8.2554  | 8.5281  | -0.0951 |
| CEU | NBPF16 | 144871390 | 6.4884  | 7.8459  | -0.5114 |
| CEU | NBPF16 | 144876390 | 4.6322  | 6.4814  | -0.8288 |
| CEU | NBPF16 | 144881390 | 4.6322  | 6.3108  | -0.7707 |
| CEU | NBPF16 | 144886390 | 4.7699  | 6.3108  | -0.7075 |
| CEU | NBPF16 | 144891390 | 4.8538  | 6.6519  | -0.7872 |
| CEU | NBPF16 | 144896390 | 2.18    | 4.0935  | -1.2867 |
| CEU | NBPF16 | 144901390 | 0.6778  | 2.5584  | -1.8734 |
| CEU | NBPF16 | 144906390 | 4.2447  | 4.9463  | -0.4001 |
| CEU | NBPF16 | 144911390 | 9.9502  | 7.8459  | 0.7927  |

## 2\_TajimasD\_data

|     |        |           |        |        |         |
|-----|--------|-----------|--------|--------|---------|
| CEU | NBPF16 | 144916390 | 9.7435 | 8.8692 | 0.2942  |
| CEU | NBPF16 | 144921390 | 5.3995 | 6.4814 | -0.4849 |
| CEU | NBPF16 | 144926390 | 5.6089 | 6.1402 | -0.25   |
| CEU | NBPF16 | 144931390 | 9.8682 | 8.187  | 0.6091  |
| CEU | NBPF16 | 144936390 | 8.9517 | 8.3576 | 0.2112  |
| CEU | NBPF16 | 144941390 | 5.867  | 7.6753 | -0.6951 |
| CEU | NBPF16 | 144946390 | 5.9858 | 6.9931 | -0.4215 |
| CEU | NBPF16 | 144951390 | 5.2711 | 5.9697 | -0.3372 |
| CEU | NBPF16 | 144956390 | 3.8872 | 4.4346 | -0.3435 |
| CHB | NBPF16 | 143926390 | 1.8987 | 1.8636 | 0.0448  |
| CHB | NBPF16 | 143931390 | 1.3259 | 2.5412 | -1.2136 |
| CHB | NBPF16 | 143936390 | 1.2056 | 2.3718 | -1.231  |
| CHB | NBPF16 | 143941390 | 1.565  | 1.6942 | -0.1773 |
| CHB | NBPF16 | 143946390 | 0.668  | 2.5412 | -1.8705 |
| CHB | NBPF16 | 143951390 | 0.1746 | 2.3718 | -2.3193 |
| CHB | NBPF16 | 143956390 | 0.068  | 1.0165 | -1.8876 |
| CHB | NBPF16 | 143961390 | 0.1163 | 1.8636 | -2.2293 |
| CHB | NBPF16 | 143966390 | 0.6115 | 1.8636 | -1.5975 |
| CHB | NBPF16 | 143971390 | 0.7719 | 1.0165 | -0.4868 |
| CHB | NBPF16 | 143976390 | 0.4377 | 1.0165 | -1.1518 |
| CHB | NBPF16 | 143981390 | 2.4051 | 2.5412 | -0.1359 |
| CHB | NBPF16 | 143986390 | 3.2345 | 2.8801 | 0.3195  |
| CHB | NBPF16 | 143991390 | 2.3339 | 2.5412 | -0.207  |
| CHB | NBPF16 | 143996390 | 3.0019 | 3.3883 | -0.3043 |
| CHB | NBPF16 | 144001390 | 1.794  | 3.5577 | -1.3329 |
| CHB | NBPF16 | 144006390 | 4.0793 | 5.0825 | -0.557  |
| CHB | NBPF16 | 144011390 | 8.0517 | 8.3013 | -0.089  |
| CHB | NBPF16 | 144016390 | 4.8207 | 6.946  | -0.8921 |
| CHB | NBPF16 | 144021390 | 2.2808 | 3.3883 | -0.8722 |
| CHB | NBPF16 | 144026390 | 3.1814 | 3.2189 | -0.0308 |
| CHB | NBPF16 | 144031390 | 1.8627 | 3.0495 | -1.0207 |
| CHB | NBPF16 | 144036390 | 0.4276 | 2.2024 | -1.9873 |
| CHB | NBPF16 | 144041390 | 3.1544 | 3.3883 | -0.1842 |
| CHB | NBPF16 | 144046390 | 3.5269 | 3.8965 | -0.2585 |
| CHB | NBPF16 | 144051390 | 1.4803 | 3.5577 | -1.57   |
| CHB | NBPF16 | 144056390 | 0.9958 | 2.8801 | -1.6989 |
| CHB | NBPF16 | 144061390 | 0.9088 | 2.5412 | -1.6301 |
| CHB | NBPF16 | 144066390 | 1.7082 | 3.2189 | -1.242  |
| CHB | NBPF16 | 144071390 | 1.0088 | 2.2024 | -1.3365 |
| CHB | NBPF16 | 144076390 | 0.2962 | 2.8801 | -2.3297 |
| CHB | NBPF16 | 144081390 | 0.4894 | 3.2189 | -2.244  |
| CHB | NBPF16 | 144086390 | 0.3752 | 2.033  | -1.9769 |
| CHB | NBPF16 | 144091390 | 0.3105 | 1.8636 | -1.9815 |
| CHB | NBPF16 | 144096390 | 0.2427 | 1.0165 | -1.5399 |
| CHB | NBPF16 | 144101390 | 0      | 0      | 0       |
| CHB | NBPF16 | 144106390 | 0      | 0      | 0       |
| CHB | NBPF16 | 144111390 | 0      | 0      | 0       |
| CHB | NBPF16 | 144116390 | 0      | 0      | 0       |
| CHB | NBPF16 | 144121390 | 0      | 0      | 0       |



## 2\_TajimasD\_data

|     |        |           |        |        |         |
|-----|--------|-----------|--------|--------|---------|
| CHB | NBPF16 | 144126390 | 0      | 0      | 0       |
| CHB | NBPF16 | 144131390 | 0      | 0      | 0       |
| CHB | NBPF16 | 144136390 | 0      | 0      | 0       |
| CHB | NBPF16 | 144141390 | 0      | 0      | 0       |
| CHB | NBPF16 | 144146390 | 0      | 0      | 0       |
| CHB | NBPF16 | 144151390 | 0      | 0      | 0       |
| CHB | NBPF16 | 144156390 | 0.0289 | 0.1694 | -0.8349 |
| CHB | NBPF16 | 144161390 | 0.6709 | 0.5082 | 0.5107  |
| CHB | NBPF16 | 144166390 | 1.6554 | 1.3553 | 0.4864  |
| CHB | NBPF16 | 144171390 | 1.0135 | 1.0165 | -0.006  |
| CHB | NBPF16 | 144176390 | 0.4934 | 0.1694 | 1.9253  |
| CHB | NBPF16 | 144181390 | 0.4934 | 0.1694 | 1.9253  |
| CHB | NBPF16 | 144186390 | 0      | 0      | 0       |
| CHB | NBPF16 | 144191390 | 0      | 0      | 0       |
| CHB | NBPF16 | 144196390 | 0.1376 | 0.3388 | -0.8071 |
| CHB | NBPF16 | 144201390 | 0.1376 | 0.3388 | -0.8071 |
| CHB | NBPF16 | 144206390 | 0      | 0      | 0       |
| CHB | NBPF16 | 144211390 | 0      | 0      | 0       |
| CHB | NBPF16 | 144216390 | 0.5108 | 1.1859 | -1.205  |
| CHB | NBPF16 | 144221390 | 0.5108 | 1.1859 | -1.205  |
| CHB | NBPF16 | 144226390 | 0      | 0      | 0       |
| CHB | NBPF16 | 144231390 | 0      | 0      | 0       |
| CHB | NBPF16 | 144236390 | 0      | 0      | 0       |
| CHB | NBPF16 | 144241390 | 0      | 0      | 0       |
| CHB | NBPF16 | 144246390 | 0      | 0      | 0       |
| CHB | NBPF16 | 144251390 | 0      | 0      | 0       |
| CHB | NBPF16 | 144256390 | 0      | 0      | 0       |
| CHB | NBPF16 | 144261390 | 0      | 0      | 0       |
| CHB | NBPF16 | 144266390 | 0      | 0      | 0       |
| CHB | NBPF16 | 144271390 | 0.3031 | 0.1694 | 0.7945  |
| CHB | NBPF16 | 144276390 | 0.3031 | 0.1694 | 0.7945  |
| CHB | NBPF16 | 144281390 | 0.3031 | 0.1694 | 0.7945  |
| CHB | NBPF16 | 144286390 | 0.3031 | 0.1694 | 0.7945  |
| CHB | NBPF16 | 144291390 | 0      | 0      | 0       |
| CHB | NBPF16 | 144296390 | 0      | 0      | 0       |
| CHB | NBPF16 | 144301390 | 0.8692 | 0.8471 | 0.0498  |
| CHB | NBPF16 | 144306390 | 0.8692 | 0.8471 | 0.0498  |
| CHB | NBPF16 | 144311390 | 0      | 0      | 0       |
| CHB | NBPF16 | 144316390 | 0.2496 | 0.6777 | -1.1192 |
| CHB | NBPF16 | 144321390 | 0.3065 | 0.8471 | -1.219  |
| CHB | NBPF16 | 144326390 | 0.0666 | 0.3388 | -1.0919 |
| CHB | NBPF16 | 144331390 | 0.0097 | 0.1694 | -0.949  |
| CHB | NBPF16 | 144336390 | 0.0192 | 0.1694 | -0.8925 |
| CHB | NBPF16 | 144341390 | 0.0577 | 0.3388 | -1.1276 |
| CHB | NBPF16 | 144346390 | 0.0385 | 0.1694 | -0.7778 |
| CHB | NBPF16 | 144351390 | 0      | 0      | 0       |
| CHB | NBPF16 | 144356390 | 0      | 0      | 0       |
| CHB | NBPF16 | 144361390 | 0.1239 | 0.5082 | -1.2064 |
| CHB | NBPF16 | 144366390 | 0.1239 | 0.5082 | -1.2064 |

## 2\_TajimasD\_data

|     |        |           |         |         |         |
|-----|--------|-----------|---------|---------|---------|
| CHB | NBPF16 | 144371390 | 0       | 0       | 0       |
| CHB | NBPF16 | 144376390 | 0       | 0       | 0       |
| CHB | NBPF16 | 144381390 | 0       | 0       | 0       |
| CHB | NBPF16 | 144386390 | 0.0097  | 0.1694  | -0.949  |
| CHB | NBPF16 | 144391390 | 0.0097  | 0.1694  | -0.949  |
| CHB | NBPF16 | 144396390 | 0       | 0       | 0       |
| CHB | NBPF16 | 144401390 | 0       | 0       | 0       |
| CHB | NBPF16 | 144406390 | 0       | 0       | 0       |
| CHB | NBPF16 | 144411390 | 0       | 0       | 0       |
| CHB | NBPF16 | 144416390 | 0       | 0       | 0       |
| CHB | NBPF16 | 144421390 | 0       | 0       | 0       |
| CHB | NBPF16 | 144426390 | 0       | 0       | 0       |
| CHB | NBPF16 | 144431390 | 0       | 0       | 0       |
| CHB | NBPF16 | 144436390 | 0       | 0       | 0       |
| CHB | NBPF16 | 144441390 | 0       | 0       | 0       |
| CHB | NBPF16 | 144446390 | 0       | 0       | 0       |
| CHB | NBPF16 | 144451390 | 0.8382  | 0.8471  | -0.0201 |
| CHB | NBPF16 | 144456390 | 0.8382  | 0.8471  | -0.0201 |
| CHB | NBPF16 | 144461390 | 0.5378  | 0.8471  | -0.6975 |
| CHB | NBPF16 | 144466390 | 1.0702  | 2.2024  | -1.2678 |
| CHB | NBPF16 | 144471390 | 1.0527  | 3.2189  | -1.7809 |
| CHB | NBPF16 | 144476390 | 1.6078  | 3.5577  | -1.4736 |
| CHB | NBPF16 | 144481390 | 1.0973  | 1.8636  | -0.9777 |
| CHB | NBPF16 | 144486390 | 0.0097  | 0.1694  | -0.949  |
| CHB | NBPF16 | 144491390 | 0.0097  | 0.1694  | -0.949  |
| CHB | NBPF16 | 144496390 | 0.0097  | 0.1694  | -0.949  |
| CHB | NBPF16 | 144501390 | 0.0579  | 0.3388  | -1.1268 |
| CHB | NBPF16 | 144506390 | 0.7192  | 1.1859  | -0.8331 |
| CHB | NBPF16 | 144511390 | 1.2557  | 1.6942  | -0.6018 |
| CHB | NBPF16 | 144516390 | 4.9562  | 4.7436  | 0.1254  |
| CHB | NBPF16 | 144521390 | 8.7542  | 8.4708  | 0.0992  |
| CHB | NBPF16 | 144526390 | 13.3449 | 11.3508 | 0.5316  |
| CHB | NBPF16 | 144531390 | 9.6002  | 9.9955  | -0.1187 |
| CHB | NBPF16 | 144536390 | 1.0228  | 4.5742  | -2.1625 |
| CHB | NBPF16 | 144541390 | 2.2515  | 4.7436  | -1.47   |
| CHB | NBPF16 | 144546390 | 3.4925  | 7.2848  | -1.5244 |
| CHB | NBPF16 | 144551390 | 4.502   | 7.6237  | -1.2038 |
| CHB | NBPF16 | 144556390 | 5.9779  | 7.4543  | -0.5812 |
| CHB | NBPF16 | 144561390 | 7.7382  | 9.4872  | -0.5513 |
| CHB | NBPF16 | 144566390 | 10.6198 | 11.1814 | -0.1519 |
| CHB | NBPF16 | 144571390 | 8.4649  | 8.4708  | -0.0021 |
| CHB | NBPF16 | 144576390 | 7.434   | 8.8096  | -0.4644 |
| CHB | NBPF16 | 144581390 | 8.3173  | 8.8096  | -0.1662 |
| CHB | NBPF16 | 144586390 | 8.2109  | 7.4543  | 0.2978  |
| CHB | NBPF16 | 144591390 | 9.1022  | 8.6402  | 0.1588  |
| CHB | NBPF16 | 144596390 | 6.9758  | 8.3013  | -0.4727 |
| CHB | NBPF16 | 144601390 | 6.6834  | 6.4378  | 0.1104  |
| CHB | NBPF16 | 144606390 | 8.9724  | 6.6072  | 1.0388  |
| CHB | NBPF16 | 144611390 | 12.4634 | 10.5037 | 0.5618  |

## 2\_TajimasD\_data

|     |        |           |         |         |         |
|-----|--------|-----------|---------|---------|---------|
| CHB | NBPF16 | 144616390 | 13.6497 | 14.7391 | -0.2269 |
| CHB | NBPF16 | 144621390 | 6.9787  | 10.1649 | -0.9419 |
| CHB | NBPF16 | 144626390 | 0.7933  | 1.6942  | -1.2364 |
| CHB | NBPF16 | 144631390 | 0       | 0       | 0       |
| CHB | NBPF16 | 144636390 | 0       | 0       | 0       |
| CHB | NBPF16 | 144641390 | 0       | 0       | 0       |
| CHB | NBPF16 | 144646390 | 0       | 0       | 0       |
| CHB | NBPF16 | 144651390 | 0       | 0       | 0       |
| CHB | NBPF16 | 144656390 | 0       | 0       | 0       |
| CHB | NBPF16 | 144661390 | 0       | 0       | 0       |
| CHB | NBPF16 | 144666390 | 0       | 0       | 0       |
| CHB | NBPF16 | 144671390 | 0.7561  | 1.8636  | -1.413  |
| CHB | NBPF16 | 144676390 | 1.7308  | 5.9295  | -2.0327 |
| CHB | NBPF16 | 144681390 | 1.7091  | 6.4378  | -2.1262 |
| CHB | NBPF16 | 144686390 | 2.7173  | 6.0989  | -1.5963 |
| CHB | NBPF16 | 144691390 | 2.7183  | 5.7601  | -1.5112 |
| CHB | NBPF16 | 144696390 | 2.6223  | 5.2519  | -1.4182 |
| CHB | NBPF16 | 144701390 | 2.8797  | 7.4543  | -1.8007 |
| CHB | NBPF16 | 144706390 | 1.3141  | 5.7601  | -2.2089 |
| CHB | NBPF16 | 144711390 | 0.3213  | 1.5247  | -1.7878 |
| CHB | NBPF16 | 144716390 | 0       | 0       | 0       |
| CHB | NBPF16 | 144721390 | 0       | 0       | 0       |
| CHB | NBPF16 | 144726390 | 0       | 0       | 0       |
| CHB | NBPF16 | 144731390 | 0       | 0       | 0       |
| CHB | NBPF16 | 144736390 | 0       | 0       | 0       |
| CHB | NBPF16 | 144741390 | 0       | 0       | 0       |
| CHB | NBPF16 | 144746390 | 0       | 0       | 0       |
| CHB | NBPF16 | 144751390 | 0       | 0       | 0       |
| CHB | NBPF16 | 144756390 | 0       | 0       | 0       |
| CHB | NBPF16 | 144761390 | 0       | 0       | 0       |
| CHB | NBPF16 | 144766390 | 0       | 0       | 0       |
| CHB | NBPF16 | 144771390 | 0       | 0       | 0       |
| CHB | NBPF16 | 144776390 | 0       | 0       | 0       |
| CHB | NBPF16 | 144781390 | 0       | 0       | 0       |
| CHB | NBPF16 | 144786390 | 0       | 0       | 0       |
| CHB | NBPF16 | 144791390 | 0       | 0       | 0       |
| CHB | NBPF16 | 144796390 | 0       | 0       | 0       |
| CHB | NBPF16 | 144801390 | 0       | 0       | 0       |
| CHB | NBPF16 | 144806390 | 1.8597  | 1.5247  | 0.4977  |
| CHB | NBPF16 | 144811390 | 11.1342 | 10.6731 | 0.1302  |
| CHB | NBPF16 | 144816390 | 14.1862 | 13.045  | 0.2669  |
| CHB | NBPF16 | 144821390 | 10.6678 | 9.6567  | 0.3135  |
| CHB | NBPF16 | 144826390 | 7.7308  | 7.7931  | -0.0235 |
| CHB | NBPF16 | 144831390 | 3.1416  | 3.8965  | -0.528  |
| CHB | NBPF16 | 144836390 | 3.4209  | 5.7601  | -1.1622 |
| CHB | NBPF16 | 144841390 | 2.6484  | 7.9625  | -1.9692 |
| CHB | NBPF16 | 144846390 | 4.9126  | 8.6402  | -1.2813 |
| CHB | NBPF16 | 144851390 | 11.846  | 12.3673 | -0.1282 |
| CHB | NBPF16 | 144856390 | 12.5279 | 13.2144 | -0.1586 |

## 2\_TajimasD\_data

|     |        |           |         |         |         |
|-----|--------|-----------|---------|---------|---------|
| CHB | NBPF16 | 144861390 | 8.7838  | 9.3178  | -0.1712 |
| CHB | NBPF16 | 144866390 | 7.8903  | 7.9625  | -0.0268 |
| CHB | NBPF16 | 144871390 | 6.3432  | 7.7931  | -0.548  |
| CHB | NBPF16 | 144876390 | 4.8494  | 7.1154  | -0.9306 |
| CHB | NBPF16 | 144881390 | 5.0383  | 7.7931  | -1.0412 |
| CHB | NBPF16 | 144886390 | 5.3866  | 7.9625  | -0.9545 |
| CHB | NBPF16 | 144891390 | 5.4298  | 7.7931  | -0.8932 |
| CHB | NBPF16 | 144896390 | 3.3758  | 5.2519  | -1.0118 |
| CHB | NBPF16 | 144901390 | 2.252   | 4.2354  | -1.2912 |
| CHB | NBPF16 | 144906390 | 5.371   | 8.1319  | -1.0035 |
| CHB | NBPF16 | 144911390 | 10.3151 | 11.1814 | -0.2342 |
| CHB | NBPF16 | 144916390 | 9.3743  | 10.5037 | -0.3238 |
| CHB | NBPF16 | 144921390 | 4.7917  | 7.7931  | -1.1344 |
| CHB | NBPF16 | 144926390 | 5.2284  | 7.9625  | -1.0132 |
| CHB | NBPF16 | 144931390 | 9.8758  | 9.8261  | 0.0152  |
| CHB | NBPF16 | 144936390 | 9.2297  | 9.4872  | -0.0812 |
| CHB | NBPF16 | 144941390 | 6.7124  | 9.1484  | -0.7942 |
| CHB | NBPF16 | 144946390 | 6.6354  | 8.979   | -0.7774 |
| CHB | NBPF16 | 144951390 | 5.1245  | 7.1154  | -0.8176 |
| CHB | NBPF16 | 144956390 | 4.2909  | 5.5907  | -0.6632 |
| YRI | NBPF16 | 143926390 | 2.433   | 4.3696  | -1.2228 |
| YRI | NBPF16 | 143931390 | 2.2034  | 4.0335  | -1.2383 |
| YRI | NBPF16 | 143936390 | 2.3952  | 3.3612  | -0.7632 |
| YRI | NBPF16 | 143941390 | 2.0898  | 2.3529  | -0.2785 |
| YRI | NBPF16 | 143946390 | 1.1742  | 2.1848  | -1.1347 |
| YRI | NBPF16 | 143951390 | 0.8801  | 3.1932  | -1.9077 |
| YRI | NBPF16 | 143956390 | 0.5328  | 2.8571  | -2.102  |
| YRI | NBPF16 | 143961390 | 0.8898  | 3.6974  | -2.0464 |
| YRI | NBPF16 | 143966390 | 1.053   | 3.5293  | -1.8775 |
| YRI | NBPF16 | 143971390 | 0.8293  | 1.6806  | -1.1711 |
| YRI | NBPF16 | 143976390 | 0.7176  | 1.5126  | -1.1838 |
| YRI | NBPF16 | 143981390 | 2.6817  | 3.0251  | -0.2962 |
| YRI | NBPF16 | 143986390 | 3.8228  | 4.3696  | -0.3453 |
| YRI | NBPF16 | 143991390 | 3.6944  | 5.7141  | -1.0071 |
| YRI | NBPF16 | 143996390 | 4.5837  | 5.7141  | -0.5637 |
| YRI | NBPF16 | 144001390 | 3.3824  | 4.7057  | -0.7833 |
| YRI | NBPF16 | 144006390 | 5.7728  | 8.067   | -0.8372 |
| YRI | NBPF16 | 144011390 | 9.2444  | 13.7811 | -1.0037 |
| YRI | NBPF16 | 144016390 | 5.6022  | 11.2602 | -1.5147 |
| YRI | NBPF16 | 144021390 | 3.0632  | 5.8822  | -1.3698 |
| YRI | NBPF16 | 144026390 | 3.6688  | 5.378   | -0.8995 |
| YRI | NBPF16 | 144031390 | 2.2513  | 4.5377  | -1.3971 |
| YRI | NBPF16 | 144036390 | 0.9444  | 4.0335  | -2.0901 |
| YRI | NBPF16 | 144041390 | 3.5951  | 5.5461  | -0.9991 |
| YRI | NBPF16 | 144046390 | 4.3349  | 6.7225  | -1.0288 |
| YRI | NBPF16 | 144051390 | 2.2484  | 6.3864  | -1.8676 |
| YRI | NBPF16 | 144056390 | 1.5229  | 4.8738  | -1.9235 |
| YRI | NBPF16 | 144061390 | 2.0102  | 4.8738  | -1.6438 |
| YRI | NBPF16 | 144066390 | 2.799   | 5.7141  | -1.4536 |

## 2\_TajimasD\_data

|     |        |           |        |        |         |
|-----|--------|-----------|--------|--------|---------|
| YRI | NBPF16 | 144071390 | 1.4017 | 4.3696 | -1.874  |
| YRI | NBPF16 | 144076390 | 0.9919 | 3.8654 | -2.0165 |
| YRI | NBPF16 | 144081390 | 1.8077 | 3.6974 | -1.3774 |
| YRI | NBPF16 | 144086390 | 1.3922 | 2.3529 | -1.0169 |
| YRI | NBPF16 | 144091390 | 0.7132 | 2.0167 | -1.5585 |
| YRI | NBPF16 | 144096390 | 0.3113 | 1.1764 | -1.5473 |
| YRI | NBPF16 | 144101390 | 0      | 0      | 0       |
| YRI | NBPF16 | 144106390 | 0      | 0      | 0       |
| YRI | NBPF16 | 144111390 | 0      | 0      | 0       |
| YRI | NBPF16 | 144116390 | 0      | 0      | 0       |
| YRI | NBPF16 | 144121390 | 0      | 0      | 0       |
| YRI | NBPF16 | 144126390 | 0      | 0      | 0       |
| YRI | NBPF16 | 144131390 | 0      | 0      | 0       |
| YRI | NBPF16 | 144136390 | 0      | 0      | 0       |
| YRI | NBPF16 | 144141390 | 0.0276 | 0.3361 | -1.2385 |
| YRI | NBPF16 | 144146390 | 0.0276 | 0.3361 | -1.2385 |
| YRI | NBPF16 | 144151390 | 0      | 0      | 0       |
| YRI | NBPF16 | 144156390 | 0.0369 | 0.3361 | -1.2012 |
| YRI | NBPF16 | 144161390 | 0.6035 | 1.0084 | -0.8072 |
| YRI | NBPF16 | 144166390 | 1.7811 | 1.6806 | 0.1383  |
| YRI | NBPF16 | 144171390 | 1.2144 | 1.0084 | 0.4107  |
| YRI | NBPF16 | 144176390 | 0.4914 | 0.1681 | 1.9219  |
| YRI | NBPF16 | 144181390 | 0.4914 | 0.1681 | 1.9219  |
| YRI | NBPF16 | 144186390 | 0.0093 | 0.1681 | -0.944  |
| YRI | NBPF16 | 144191390 | 0.0185 | 0.3361 | -1.275  |
| YRI | NBPF16 | 144196390 | 0.1234 | 0.3361 | -0.8539 |
| YRI | NBPF16 | 144201390 | 0.1141 | 0.1681 | -0.321  |
| YRI | NBPF16 | 144206390 | 0      | 0      | 0       |
| YRI | NBPF16 | 144211390 | 0      | 0      | 0       |
| YRI | NBPF16 | 144216390 | 0.6969 | 1.5126 | -1.2146 |
| YRI | NBPF16 | 144221390 | 0.6969 | 1.5126 | -1.2146 |
| YRI | NBPF16 | 144226390 | 0      | 0      | 0       |
| YRI | NBPF16 | 144231390 | 0      | 0      | 0       |
| YRI | NBPF16 | 144236390 | 0      | 0      | 0       |
| YRI | NBPF16 | 144241390 | 0      | 0      | 0       |
| YRI | NBPF16 | 144246390 | 0      | 0      | 0       |
| YRI | NBPF16 | 144251390 | 0      | 0      | 0       |
| YRI | NBPF16 | 144256390 | 0      | 0      | 0       |
| YRI | NBPF16 | 144261390 | 0      | 0      | 0       |
| YRI | NBPF16 | 144266390 | 0      | 0      | 0       |
| YRI | NBPF16 | 144271390 | 0.2983 | 0.1681 | 0.774   |
| YRI | NBPF16 | 144276390 | 0.2983 | 0.1681 | 0.774   |
| YRI | NBPF16 | 144281390 | 0.2983 | 0.1681 | 0.774   |
| YRI | NBPF16 | 144286390 | 0.2983 | 0.1681 | 0.774   |
| YRI | NBPF16 | 144291390 | 0      | 0      | 0       |
| YRI | NBPF16 | 144296390 | 0      | 0      | 0       |
| YRI | NBPF16 | 144301390 | 1.6516 | 1.0084 | 1.2823  |
| YRI | NBPF16 | 144306390 | 1.6516 | 1.0084 | 1.2823  |
| YRI | NBPF16 | 144311390 | 0      | 0      | 0       |

## 2\_TajimasD\_data

|     |        |           |         |         |         |
|-----|--------|-----------|---------|---------|---------|
| YRI | NBPF16 | 144316390 | 0.2915  | 0.8403  | -1.2395 |
| YRI | NBPF16 | 144321390 | 0.3827  | 1.1764  | -1.4196 |
| YRI | NBPF16 | 144326390 | 0.1005  | 0.5042  | -1.2687 |
| YRI | NBPF16 | 144331390 | 0.0093  | 0.1681  | -0.944  |
| YRI | NBPF16 | 144336390 | 0.5042  | 0.1681  | 1.998   |
| YRI | NBPF16 | 144341390 | 0.5042  | 0.1681  | 1.998   |
| YRI | NBPF16 | 144346390 | 0       | 0       | 0       |
| YRI | NBPF16 | 144351390 | 0       | 0       | 0       |
| YRI | NBPF16 | 144356390 | 0.0093  | 0.1681  | -0.944  |
| YRI | NBPF16 | 144361390 | 0.6053  | 0.6722  | -0.1751 |
| YRI | NBPF16 | 144366390 | 0.5961  | 0.5042  | 0.2888  |
| YRI | NBPF16 | 144371390 | 0       | 0       | 0       |
| YRI | NBPF16 | 144376390 | 0.0093  | 0.1681  | -0.944  |
| YRI | NBPF16 | 144381390 | 0.0093  | 0.1681  | -0.944  |
| YRI | NBPF16 | 144386390 | 0       | 0       | 0       |
| YRI | NBPF16 | 144391390 | 0       | 0       | 0       |
| YRI | NBPF16 | 144396390 | 0       | 0       | 0       |
| YRI | NBPF16 | 144401390 | 0       | 0       | 0       |
| YRI | NBPF16 | 144406390 | 0       | 0       | 0       |
| YRI | NBPF16 | 144411390 | 0       | 0       | 0       |
| YRI | NBPF16 | 144416390 | 0       | 0       | 0       |
| YRI | NBPF16 | 144421390 | 0       | 0       | 0       |
| YRI | NBPF16 | 144426390 | 0       | 0       | 0       |
| YRI | NBPF16 | 144431390 | 0       | 0       | 0       |
| YRI | NBPF16 | 144436390 | 0       | 0       | 0       |
| YRI | NBPF16 | 144441390 | 0       | 0       | 0       |
| YRI | NBPF16 | 144446390 | 0       | 0       | 0       |
| YRI | NBPF16 | 144451390 | 0.7028  | 0.8403  | -0.3106 |
| YRI | NBPF16 | 144456390 | 0.7028  | 0.8403  | -0.3106 |
| YRI | NBPF16 | 144461390 | 0.8775  | 1.1764  | -0.5346 |
| YRI | NBPF16 | 144466390 | 2.6992  | 4.5377  | -1.1234 |
| YRI | NBPF16 | 144471390 | 3.0513  | 5.5461  | -1.2776 |
| YRI | NBPF16 | 144476390 | 2.8798  | 4.2016  | -0.8634 |
| YRI | NBPF16 | 144481390 | 1.7136  | 2.1848  | -0.5291 |
| YRI | NBPF16 | 144486390 | 0.1892  | 0.6722  | -1.2645 |
| YRI | NBPF16 | 144491390 | 0.1623  | 0.6722  | -1.3349 |
| YRI | NBPF16 | 144496390 | 0.0365  | 0.1681  | -0.7823 |
| YRI | NBPF16 | 144501390 | 0.0185  | 0.3361  | -1.275  |
| YRI | NBPF16 | 144506390 | 0.2261  | 1.1764  | -1.6997 |
| YRI | NBPF16 | 144511390 | 1.0273  | 1.6806  | -0.8987 |
| YRI | NBPF16 | 144516390 | 5.0217  | 5.7141  | -0.3453 |
| YRI | NBPF16 | 144521390 | 9.0116  | 10.924  | -0.5267 |
| YRI | NBPF16 | 144526390 | 14.37   | 15.2937 | -0.1851 |
| YRI | NBPF16 | 144531390 | 13.8969 | 14.6214 | -0.1515 |
| YRI | NBPF16 | 144536390 | 5.6131  | 7.3947  | -0.704  |
| YRI | NBPF16 | 144541390 | 6.5549  | 6.8906  | -0.1415 |
| YRI | NBPF16 | 144546390 | 10.1572 | 12.7727 | -0.6218 |
| YRI | NBPF16 | 144551390 | 8.2651  | 13.7811 | -1.2203 |
| YRI | NBPF16 | 144556390 | 9.4001  | 11.0921 | -0.4594 |

## 2\_TajimasD\_data

|     |        |           |         |         |         |
|-----|--------|-----------|---------|---------|---------|
| YRI | NBPF16 | 144561390 | 12.6806 | 13.613  | -0.2087 |
| YRI | NBPF16 | 144566390 | 15.3568 | 16.302  | -0.1782 |
| YRI | NBPF16 | 144571390 | 11.9521 | 11.9324 | 0.005   |
| YRI | NBPF16 | 144576390 | 9.9961  | 11.4282 | -0.3781 |
| YRI | NBPF16 | 144581390 | 10.5001 | 11.0921 | -0.1607 |
| YRI | NBPF16 | 144586390 | 11.4925 | 10.756  | 0.2058  |
| YRI | NBPF16 | 144591390 | 12.5259 | 13.7811 | -0.2777 |
| YRI | NBPF16 | 144596390 | 9.0731  | 12.1005 | -0.7574 |
| YRI | NBPF16 | 144601390 | 6.9564  | 9.9157  | -0.8922 |
| YRI | NBPF16 | 144606390 | 8.3905  | 8.9073  | -0.1721 |
| YRI | NBPF16 | 144611390 | 13.1512 | 14.2853 | -0.2425 |
| YRI | NBPF16 | 144616390 | 14.5111 | 19.6633 | -0.8114 |
| YRI | NBPF16 | 144621390 | 7.6314  | 11.5963 | -1.0325 |
| YRI | NBPF16 | 144626390 | 0.5634  | 1.8487  | -1.644  |
| YRI | NBPF16 | 144631390 | 0       | 0       | 0       |
| YRI | NBPF16 | 144636390 | 0       | 0       | 0       |
| YRI | NBPF16 | 144641390 | 0       | 0       | 0       |
| YRI | NBPF16 | 144646390 | 0       | 0       | 0       |
| YRI | NBPF16 | 144651390 | 0       | 0       | 0       |
| YRI | NBPF16 | 144656390 | 0       | 0       | 0       |
| YRI | NBPF16 | 144661390 | 0       | 0       | 0       |
| YRI | NBPF16 | 144666390 | 0       | 0       | 0       |
| YRI | NBPF16 | 144671390 | 1.4173  | 4.2016  | -1.8188 |
| YRI | NBPF16 | 144676390 | 5.0858  | 11.4282 | -1.6744 |
| YRI | NBPF16 | 144681390 | 5.0165  | 10.756  | -1.6039 |
| YRI | NBPF16 | 144686390 | 3.8765  | 7.8989  | -1.4964 |
| YRI | NBPF16 | 144691390 | 3.9594  | 8.067   | -1.4989 |
| YRI | NBPF16 | 144696390 | 4.2834  | 8.7392  | -1.5104 |
| YRI | NBPF16 | 144701390 | 4.835   | 11.0921 | -1.6988 |
| YRI | NBPF16 | 144706390 | 3.1434  | 10.2518 | -2.0776 |
| YRI | NBPF16 | 144711390 | 1.1609  | 4.2016  | -1.9863 |
| YRI | NBPF16 | 144716390 | 0       | 0       | 0       |
| YRI | NBPF16 | 144721390 | 0       | 0       | 0       |
| YRI | NBPF16 | 144726390 | 0       | 0       | 0       |
| YRI | NBPF16 | 144731390 | 0       | 0       | 0       |
| YRI | NBPF16 | 144736390 | 0       | 0       | 0       |
| YRI | NBPF16 | 144741390 | 0       | 0       | 0       |
| YRI | NBPF16 | 144746390 | 0       | 0       | 0       |
| YRI | NBPF16 | 144751390 | 0       | 0       | 0       |
| YRI | NBPF16 | 144756390 | 0       | 0       | 0       |
| YRI | NBPF16 | 144761390 | 0       | 0       | 0       |
| YRI | NBPF16 | 144766390 | 0       | 0       | 0       |
| YRI | NBPF16 | 144771390 | 0       | 0       | 0       |
| YRI | NBPF16 | 144776390 | 0       | 0       | 0       |
| YRI | NBPF16 | 144781390 | 0       | 0       | 0       |
| YRI | NBPF16 | 144786390 | 0       | 0       | 0       |
| YRI | NBPF16 | 144791390 | 0       | 0       | 0       |
| YRI | NBPF16 | 144796390 | 0       | 0       | 0       |
| YRI | NBPF16 | 144801390 | 0       | 0       | 0       |

## 2\_TajimasD\_data

|     |        |           |         |         |         |
|-----|--------|-----------|---------|---------|---------|
| YRI | NBPF16 | 144806390 | 1.9423  | 1.6806  | 0.36    |
| YRI | NBPF16 | 144811390 | 9.2198  | 13.1089 | -0.9021 |
| YRI | NBPF16 | 144816390 | 10.8736 | 16.8062 | -1.0863 |
| YRI | NBPF16 | 144821390 | 8.9937  | 13.1089 | -0.9546 |
| YRI | NBPF16 | 144826390 | 7.8094  | 10.756  | -0.8234 |
| YRI | NBPF16 | 144831390 | 4.0291  | 5.7141  | -0.8402 |
| YRI | NBPF16 | 144836390 | 4.0455  | 8.235   | -1.5001 |
| YRI | NBPF16 | 144841390 | 4.1267  | 10.4199 | -1.8116 |
| YRI | NBPF16 | 144846390 | 6.727   | 11.5963 | -1.268  |
| YRI | NBPF16 | 144851390 | 12.7619 | 14.7895 | -0.4195 |
| YRI | NBPF16 | 144856390 | 14.0073 | 15.2937 | -0.2578 |
| YRI | NBPF16 | 144861390 | 10.3531 | 12.7727 | -0.5752 |
| YRI | NBPF16 | 144866390 | 9.8507  | 13.613  | -0.8421 |
| YRI | NBPF16 | 144871390 | 8.7652  | 12.1005 | -0.8344 |
| YRI | NBPF16 | 144876390 | 6.3705  | 8.7392  | -0.8029 |
| YRI | NBPF16 | 144881390 | 6.8743  | 11.2602 | -1.1741 |
| YRI | NBPF16 | 144886390 | 7.0213  | 11.0921 | -1.1052 |
| YRI | NBPF16 | 144891390 | 6.0627  | 8.4031  | -0.8226 |
| YRI | NBPF16 | 144896390 | 3.4921  | 6.8906  | -1.432  |
| YRI | NBPF16 | 144901390 | 2.1918  | 6.7225  | -1.9523 |
| YRI | NBPF16 | 144906390 | 5.9296  | 9.9157  | -1.2018 |
| YRI | NBPF16 | 144911390 | 11.1671 | 12.4366 | -0.3095 |
| YRI | NBPF16 | 144916390 | 11.1783 | 12.4366 | -0.3068 |
| YRI | NBPF16 | 144921390 | 6.2233  | 10.756  | -1.2667 |
| YRI | NBPF16 | 144926390 | 6.5138  | 10.4199 | -1.1244 |
| YRI | NBPF16 | 144931390 | 12.0402 | 13.1089 | -0.2479 |
| YRI | NBPF16 | 144936390 | 11.5786 | 12.4366 | -0.2092 |
| YRI | NBPF16 | 144941390 | 9.039   | 11.2602 | -0.5946 |
| YRI | NBPF16 | 144946390 | 8.3262  | 11.7644 | -0.8833 |
| YRI | NBPF16 | 144951390 | 6.4627  | 9.9157  | -1.0411 |
| YRI | NBPF16 | 144956390 | 4.8533  | 7.0586  | -0.9091 |
| CEU | NPIP   | 43726070  | 7.4185  | 8.187   | -0.2784 |
| CEU | NPIP   | 43731070  | 7.1115  | 10.0632 | -0.8833 |
| CEU | NPIP   | 43736070  | 6.1793  | 9.5515  | -1.0594 |
| CEU | NPIP   | 43741070  | 6.6118  | 8.3576  | -0.6206 |
| CEU | NPIP   | 43746070  | 6.9623  | 6.9931  | -0.0129 |
| CEU | NPIP   | 43751070  | 5.9744  | 7.1636  | -0.4868 |
| CEU | NPIP   | 43756070  | 7.9728  | 8.187   | -0.0776 |
| CEU | NPIP   | 43761070  | 8.6141  | 7.3342  | 0.5128  |
| CEU | NPIP   | 43766070  | 7.5927  | 6.6519  | 0.4119  |
| CEU | NPIP   | 43771070  | 9.3424  | 5.9697  | 1.6277  |
| CEU | NPIP   | 43776070  | 6.3537  | 4.2641  | 1.3564  |
| CEU | NPIP   | 43781070  | 2.5026  | 2.729   | -0.214  |
| CEU | NPIP   | 43786070  | 4.2222  | 4.2641  | -0.0272 |
| CEU | NPIP   | 43791070  | 5.1995  | 6.1402  | -0.4427 |
| CEU | NPIP   | 43796070  | 2.8277  | 4.7757  | -1.1457 |
| CEU | NPIP   | 43801070  | 2.853   | 3.5818  | -0.5493 |
| CEU | NPIP   | 43806070  | 4.046   | 3.2407  | 0.6603  |
| CEU | NPIP   | 43811070  | 3.5269  | 3.0701  | 0.3918  |



## 2\_TajimasD\_data

|     |      |          |         |         |         |
|-----|------|----------|---------|---------|---------|
| CEU | NPIP | 43816070 | 2.7943  | 4.2641  | -0.9541 |
| CEU | NPIP | 43821070 | 5.0744  | 4.9463  | 0.0731  |
| CEU | NPIP | 43826070 | 4.8155  | 4.0935  | 0.4855  |
| CEU | NPIP | 43831070 | 3.0511  | 4.0935  | -0.7009 |
| CEU | NPIP | 43836070 | 4.0719  | 4.2641  | -0.1248 |
| CEU | NPIP | 43841070 | 8.5595  | 5.9697  | 1.2499  |
| CEU | NPIP | 43846070 | 7.3335  | 6.8225  | 0.2187  |
| CEU | NPIP | 43851070 | 2.6324  | 4.4346  | -1.1308 |
| CEU | NPIP | 43856070 | 5.303   | 5.1169  | 0.103   |
| CEU | NPIP | 43861070 | 5.786   | 5.458   | 0.1715  |
| CEU | NPIP | 43866070 | 3.0703  | 4.2641  | -0.7749 |
| CEU | NPIP | 43871070 | 4.8097  | 4.9463  | -0.0779 |
| CEU | NPIP | 43876070 | 9.342   | 6.9931  | 0.9828  |
| CEU | NPIP | 43881070 | 8.343   | 6.4814  | 0.8344  |
| CEU | NPIP | 43886070 | 5.2144  | 4.6052  | 0.3699  |
| CEU | NPIP | 43891070 | 2.7091  | 3.5818  | -0.6578 |
| CEU | NPIP | 43896070 | 2.0328  | 3.2407  | -0.9905 |
| CEU | NPIP | 43901070 | 4.4939  | 4.7757  | -0.1657 |
| CEU | NPIP | 43906070 | 5.4189  | 4.6052  | 0.494   |
| CEU | NPIP | 43911070 | 3.6976  | 3.5818  | 0.0873  |
| CEU | NPIP | 43916070 | 4.7328  | 5.1169  | -0.2126 |
| CEU | NPIP | 43921070 | 5.0781  | 5.458   | -0.1986 |
| CEU | NPIP | 43926070 | 7.1484  | 5.6286  | 0.7731  |
| CEU | NPIP | 43931070 | 6.4721  | 5.458   | 0.5301  |
| CEU | NPIP | 43936070 | 1.7508  | 3.5818  | -1.38   |
| CEU | NPIP | 43941070 | 3.9876  | 4.0935  | -0.0712 |
| CEU | NPIP | 43946070 | 6.241   | 4.9463  | 0.7384  |
| CEU | NPIP | 43951070 | 4.5463  | 4.7757  | -0.1349 |
| CEU | NPIP | 43956070 | 5.0608  | 4.9463  | 0.0653  |
| CEU | NPIP | 43961070 | 5.5675  | 5.1169  | 0.2494  |
| CEU | NPIP | 43966070 | 4.0635  | 4.6052  | -0.3289 |
| CEU | NPIP | 43971070 | 4.4879  | 4.9463  | -0.2614 |
| CEU | NPIP | 43976070 | 8.3111  | 6.6519  | 0.7264  |
| CEU | NPIP | 43981070 | 11.0643 | 7.5047  | 1.3966  |
| CEU | NPIP | 43986070 | 7.0478  | 6.4814  | 0.2539  |
| CEU | NPIP | 43991070 | 3.5743  | 5.6286  | -1.0449 |
| CEU | NPIP | 43996070 | 2.7479  | 4.0935  | -0.9048 |
| CEU | NPIP | 44001070 | 2.5387  | 4.7757  | -1.3157 |
| CEU | NPIP | 44006070 | 4.167   | 5.9697  | -0.87   |
| CEU | NPIP | 44011070 | 7.9499  | 6.1402  | 0.8516  |
| CEU | NPIP | 44016070 | 7.7267  | 5.7991  | 0.9547  |
| CEU | NPIP | 44021070 | 8.0109  | 6.9931  | 0.4259  |
| CEU | NPIP | 44026070 | 8.1239  | 6.8225  | 0.5569  |
| CEU | NPIP | 44031070 | 6.8668  | 5.6286  | 0.6298  |
| CEU | NPIP | 44036070 | 10.8862 | 8.187   | 0.9779  |
| CEU | NPIP | 44041070 | 11.737  | 9.5515  | 0.6866  |
| CEU | NPIP | 44046070 | 10.8287 | 9.2104  | 0.5259  |
| CEU | NPIP | 44051070 | 15.5434 | 9.7221  | 1.799   |
| CEU | NPIP | 44056070 | 21.1476 | 11.7688 | 2.4238  |

## 2\_TajimasD\_data

|     |      |          |         |         |         |
|-----|------|----------|---------|---------|---------|
| CEU | NPIP | 44061070 | 19.476  | 11.9394 | 1.9215  |
| CEU | NPIP | 44066070 | 13.6955 | 8.6987  | 1.7119  |
| CEU | NPIP | 44071070 | 9.2006  | 6.3108  | 1.3268  |
| CEU | NPIP | 44076070 | 8.3212  | 6.4814  | 0.8246  |
| CEU | NPIP | 44081070 | 10.6425 | 7.5047  | 1.2311  |
| CEU | NPIP | 44086070 | 9.7745  | 7.3342  | 0.9778  |
| CEU | NPIP | 44091070 | 7.9386  | 7.1636  | 0.3172  |
| CEU | NPIP | 44096070 | 11.9235 | 9.0398  | 0.9534  |
| CEU | NPIP | 44101070 | 16.5941 | 10.4043 | 1.7956  |
| CEU | NPIP | 44106070 | 15.2876 | 9.7221  | 1.7199  |
| CEU | NPIP | 44111070 | 15.7724 | 10.2337 | 1.6317  |
| CEU | NPIP | 44116070 | 12.6417 | 9.2104  | 1.115   |
| CEU | NPIP | 44121070 | 8.7056  | 8.3576  | 0.1237  |
| CEU | NPIP | 44126070 | 10.422  | 8.3576  | 0.7338  |
| CEU | NPIP | 44131070 | 7.8194  | 6.1402  | 0.7902  |
| CEU | NPIP | 44136070 | 4.3816  | 4.2641  | 0.0763  |
| CEU | NPIP | 44141070 | 2.7318  | 2.8996  | -0.1509 |
| CEU | NPIP | 44146070 | 3.9363  | 3.0701  | 0.743   |
| CEU | NPIP | 44151070 | 7.5217  | 4.4346  | 1.937   |
| CEU | NPIP | 44156070 | 5.9897  | 5.2874  | 0.3776  |
| CEU | NPIP | 44161070 | 3.49    | 4.2641  | -0.5025 |
| CEU | NPIP | 44166070 | 2.9167  | 4.2641  | -0.8747 |
| CEU | NPIP | 44171070 | 3.1202  | 4.9463  | -1.0414 |
| CEU | NPIP | 44176070 | 4.7543  | 4.0935  | 0.4443  |
| CEU | NPIP | 44181070 | 7.2797  | 5.1169  | 1.1971  |
| CEU | NPIP | 44186070 | 7.9641  | 6.6519  | 0.5745  |
| CEU | NPIP | 44191070 | 7.5238  | 6.9931  | 0.2221  |
| CEU | NPIP | 44196070 | 10.7974 | 8.8692  | 0.6488  |
| CEU | NPIP | 44201070 | 8.9518  | 7.1636  | 0.732   |
| CEU | NPIP | 44206070 | 8.1587  | 6.4814  | 0.7518  |
| CEU | NPIP | 44211070 | 14.3836 | 9.3809  | 1.5982  |
| CEU | NPIP | 44216070 | 14.4682 | 8.5281  | 2.0726  |
| CEU | NPIP | 44221070 | 13.3455 | 8.0164  | 1.9683  |
| CEU | NPIP | 44226070 | 11.3455 | 6.4814  | 2.1802  |
| CEU | NPIP | 44231070 | 9.1697  | 6.4814  | 1.2049  |
| CEU | NPIP | 44236070 | 10.1507 | 8.0164  | 0.7883  |
| CEU | NPIP | 44241070 | 10.7081 | 7.5047  | 1.2569  |
| CEU | NPIP | 44246070 | 11.6069 | 7.8459  | 1.4168  |
| CEU | NPIP | 44251070 | 11.0987 | 7.8459  | 1.2254  |
| CEU | NPIP | 44256070 | 11.0954 | 7.8459  | 1.2241  |
| CEU | NPIP | 44261070 | 10.1962 | 6.9931  | 1.3402  |
| CEU | NPIP | 44266070 | 11.6481 | 7.6753  | 1.527   |
| CEU | NPIP | 44271070 | 12.8551 | 9.0398  | 1.2614  |
| CEU | NPIP | 44276070 | 12.5372 | 9.0398  | 1.1563  |
| CEU | NPIP | 44281070 | 10.3867 | 8.3576  | 0.7213  |
| CEU | NPIP | 44286070 | 7.9924  | 6.6519  | 0.5869  |
| CEU | NPIP | 44291070 | 7.4209  | 5.458   | 1.0262  |
| CEU | NPIP | 44296070 | 5.806   | 6.1402  | -0.1573 |
| CEU | NPIP | 44301070 | 4.724   | 5.9697  | -0.6012 |

## 2\_TajimasD\_data

|     |      |          |         |         |         |
|-----|------|----------|---------|---------|---------|
| CEU | NPIP | 44306070 | 5.5156  | 5.9697  | -0.2192 |
| CEU | NPIP | 44311070 | 6.7069  | 6.8225  | -0.0495 |
| CEU | NPIP | 44316070 | 7.2154  | 8.0164  | -0.2959 |
| CEU | NPIP | 44321070 | 8.3185  | 9.2104  | -0.2898 |
| CEU | NPIP | 44326070 | 6.9013  | 8.3576  | -0.5177 |
| CEU | NPIP | 44331070 | 4.2117  | 6.4814  | -1.0173 |
| CEU | NPIP | 44336070 | 3.6693  | 5.6286  | -0.9966 |
| CEU | NPIP | 44341070 | 4.0579  | 6.8225  | -1.183  |
| CEU | NPIP | 44346070 | 4.9808  | 7.3342  | -0.9429 |
| CEU | NPIP | 44351070 | 5.5638  | 6.9931  | -0.598  |
| CEU | NPIP | 44356070 | 3.8427  | 6.1402  | -1.0811 |
| CEU | NPIP | 44361070 | 4.0158  | 7.6753  | -1.4066 |
| CEU | NPIP | 44366070 | 6.896   | 8.8692  | -0.664  |
| CEU | NPIP | 44371070 | 6.5762  | 8.5281  | -0.681  |
| CEU | NPIP | 44376070 | 6.1763  | 9.8926  | -1.13   |
| CEU | NPIP | 44381070 | 6.5321  | 8.5281  | -0.6964 |
| CEU | NPIP | 44386070 | 6.1746  | 7.3342  | -0.4646 |
| CEU | NPIP | 44391070 | 6.6019  | 7.8459  | -0.4686 |
| CEU | NPIP | 44396070 | 5.1173  | 7.5047  | -0.9367 |
| CEU | NPIP | 44401070 | 4.6646  | 6.8225  | -0.9234 |
| CEU | NPIP | 44406070 | 5.3191  | 6.3108  | -0.4553 |
| CEU | NPIP | 44411070 | 4.1123  | 5.7991  | -0.8355 |
| CEU | NPIP | 44416070 | 3.0282  | 3.9229  | -0.624  |
| CEU | NPIP | 44421070 | 3.0043  | 3.2407  | -0.1938 |
| CEU | NPIP | 44426070 | 3.0924  | 4.2641  | -0.7606 |
| CEU | NPIP | 44431070 | 2.738   | 3.5818  | -0.636  |
| CEU | NPIP | 44436070 | 2.7549  | 3.5818  | -0.6232 |
| CEU | NPIP | 44441070 | 2.6636  | 4.9463  | -1.3018 |
| CEU | NPIP | 44446070 | 2.6504  | 5.1169  | -1.3653 |
| CEU | NPIP | 44451070 | 4.1616  | 5.7991  | -0.811  |
| CEU | NPIP | 44456070 | 5.2041  | 6.8225  | -0.6925 |
| CEU | NPIP | 44461070 | 3.611   | 6.6519  | -1.3314 |
| CEU | NPIP | 44466070 | 2.2255  | 6.9931  | -1.9948 |
| CEU | NPIP | 44471070 | 3.5275  | 9.2104  | -1.8466 |
| CEU | NPIP | 44476070 | 3.6487  | 8.0164  | -1.6132 |
| CEU | NPIP | 44481070 | 2.3212  | 5.9697  | -1.7608 |
| CEU | NPIP | 44486070 | 3.1676  | 6.9931  | -1.6007 |
| CEU | NPIP | 44491070 | 3.9765  | 6.1402  | -1.0182 |
| CEU | NPIP | 44496070 | 5.9571  | 6.3108  | -0.1624 |
| CEU | NPIP | 44501070 | 8.5172  | 6.9931  | 0.6377  |
| CEU | NPIP | 44506070 | 9.2641  | 9.2104  | 0.0174  |
| CEU | NPIP | 44511070 | 10.2336 | 10.2337 | 0       |
| CEU | NPIP | 44516070 | 9.5951  | 7.5047  | 0.8202  |
| CEU | NPIP | 44521070 | 7.7271  | 6.4814  | 0.5583  |
| CEU | NPIP | 44526070 | 7.3836  | 5.458   | 1.0067  |
| CEU | NPIP | 44531070 | 13.6059 | 8.6987  | 1.6812  |
| CEU | NPIP | 44536070 | 18.2899 | 13.3039 | 1.1477  |
| CEU | NPIP | 44541070 | 13.0852 | 10.7454 | 0.6586  |
| CEU | NPIP | 44546070 | 8.9295  | 8.3576  | 0.2033  |

## 2\_TajimasD\_data

|     |      |          |         |         |         |
|-----|------|----------|---------|---------|---------|
| CEU | NPIP | 44551070 | 7.4362  | 8.6987  | -0.4325 |
| CEU | NPIP | 44556070 | 14.905  | 12.2805 | 0.6516  |
| CEU | NPIP | 44561070 | 35.2766 | 21.1497 | 2.0868  |
| CEU | NPIP | 44566070 | 41.4698 | 23.3671 | 2.4283  |
| CEU | NPIP | 44571070 | 23.2197 | 16.2034 | 1.3387  |
| CEU | NPIP | 44576070 | 8.8439  | 11.4277 | -0.6865 |
| CEU | NPIP | 44581070 | 8.1165  | 11.2571 | -0.8463 |
| CEU | NPIP | 44586070 | 8.8683  | 10.7454 | -0.5283 |
| CEU | NPIP | 44591070 | 10.5737 | 12.2805 | -0.4238 |
| CEU | NPIP | 44596070 | 11.2725 | 10.7454 | 0.1484  |
| CEU | NPIP | 44601070 | 12.1123 | 9.0398  | 1.0158  |
| CEU | NPIP | 44606070 | 13.449  | 11.4277 | 0.537   |
| CEU | NPIP | 44611070 | 8.3744  | 9.8926  | -0.4616 |
| CEU | NPIP | 44616070 | 4.3441  | 6.4814  | -0.958  |
| CEU | NPIP | 44621070 | 5.2049  | 5.1169  | 0.0487  |
| CEU | NPIP | 44626070 | 5.0754  | 4.9463  | 0.0736  |
| CEU | NPIP | 44631070 | 4.9668  | 5.1169  | -0.0831 |
| CEU | NPIP | 44636070 | 5.135   | 6.3108  | -0.5398 |
| CEU | NPIP | 44641070 | 3.1499  | 6.4814  | -1.4932 |
| CEU | NPIP | 44646070 | 6.4038  | 7.5047  | -0.4319 |
| CEU | NPIP | 44651070 | 7.631   | 7.6753  | -0.017  |
| CEU | NPIP | 44656070 | 3.228   | 6.4814  | -1.4582 |
| CEU | NPIP | 44661070 | 3.8534  | 5.7991  | -0.9637 |
| CEU | NPIP | 44666070 | 4.7374  | 5.2874  | -0.2957 |
| CEU | NPIP | 44671070 | 4.1672  | 6.1402  | -0.9284 |
| CEU | NPIP | 44676070 | 4.0538  | 6.3108  | -1.0362 |
| CEU | NPIP | 44681070 | 4.0138  | 5.7991  | -0.8842 |
| CEU | NPIP | 44686070 | 2.899   | 5.9697  | -1.482  |
| CEU | NPIP | 44691070 | 2.9988  | 5.7991  | -1.387  |
| CEU | NPIP | 44696070 | 3.384   | 5.2874  | -1.0235 |
| CEU | NPIP | 44701070 | 2.8464  | 5.7991  | -1.4625 |
| CEU | NPIP | 44706070 | 4.4552  | 5.1169  | -0.3663 |
| CEU | NPIP | 44711070 | 3.7454  | 3.5818  | 0.1233  |
| CEU | NPIP | 44716070 | 2.0169  | 3.9229  | -1.3294 |
| CEU | NPIP | 44721070 | 4.0825  | 5.6286  | -0.7864 |
| CEU | NPIP | 44726070 | 5.9549  | 6.4814  | -0.236  |
| CEU | NPIP | 44731070 | 4.1313  | 4.7757  | -0.379  |
| CEU | NPIP | 44736070 | 3.4327  | 4.6052  | -0.7119 |
| CEU | NPIP | 44741070 | 4.6038  | 6.3108  | -0.7837 |
| CEU | NPIP | 44746070 | 4.0008  | 5.9697  | -0.9502 |
| CEU | NPIP | 44751070 | 5.7289  | 5.9697  | -0.1162 |
| CEU | NPIP | 44756070 | 6.1639  | 5.458   | 0.369   |
| CEU | NPIP | 44761070 | 4.039   | 4.4346  | -0.2482 |
| CEU | NPIP | 44766070 | 5.4933  | 5.6286  | -0.0688 |
| CEU | NPIP | 44771070 | 5.7481  | 6.9931  | -0.5209 |
| CEU | NPIP | 44776070 | 4.3737  | 6.9931  | -1.096  |
| CEU | NPIP | 44781070 | 3.8699  | 5.458   | -0.8302 |
| CEU | NPIP | 44786070 | 2.6824  | 5.458   | -1.451  |
| CEU | NPIP | 44791070 | 2.2512  | 5.1169  | -1.5862 |

## 2\_TajimasD\_data

|     |      |          |        |        |         |
|-----|------|----------|--------|--------|---------|
| CEU | NPIP | 44796070 | 3.3222 | 4.9463 | -0.9262 |
| CEU | NPIP | 44801070 | 6.1169 | 6.9931 | -0.3666 |
| CEU | NPIP | 44806070 | 8.2979 | 7.6753 | 0.2393  |
| CEU | NPIP | 44811070 | 5.0915 | 5.6286 | -0.2732 |
| CEU | NPIP | 44816070 | 2.7421 | 4.4346 | -1.0619 |
| CEU | NPIP | 44821070 | 3.9847 | 5.9697 | -0.958  |
| CEU | NPIP | 44826070 | 5.4515 | 7.3342 | -0.7543 |
| CEU | NPIP | 44831070 | 5.5803 | 7.6753 | -0.8053 |
| CEU | NPIP | 44836070 | 4.6932 | 8.6987 | -1.3723 |
| CEU | NPIP | 44841070 | 4.9282 | 9.0398 | -1.3594 |
| CEU | NPIP | 44846070 | 4.0206 | 8.0164 | -1.4759 |
| CHB | NPIP | 43726070 | 6.9798 | 8.6402 | -0.5707 |
| CHB | NPIP | 43731070 | 6.2298 | 9.1484 | -0.9516 |
| CHB | NPIP | 43736070 | 6.5842 | 7.7931 | -0.4569 |
| CHB | NPIP | 43741070 | 6.5835 | 7.4543 | -0.3428 |
| CHB | NPIP | 43746070 | 5.8498 | 7.7931 | -0.7345 |
| CHB | NPIP | 43751070 | 5.7306 | 6.4378 | -0.318  |
| CHB | NPIP | 43756070 | 7.6684 | 7.9625 | -0.109  |
| CHB | NPIP | 43761070 | 8.1289 | 8.6402 | -0.1758 |
| CHB | NPIP | 43766070 | 6.6153 | 7.4543 | -0.3303 |
| CHB | NPIP | 43771070 | 6.8879 | 8.1319 | -0.4522 |
| CHB | NPIP | 43776070 | 4.3415 | 7.1154 | -1.1392 |
| CHB | NPIP | 43781070 | 2.0758 | 6.0989 | -1.8991 |
| CHB | NPIP | 43786070 | 3.3914 | 6.6072 | -1.4124 |
| CHB | NPIP | 43791070 | 4.2286 | 7.2848 | -1.2285 |
| CHB | NPIP | 43796070 | 2.4575 | 5.9295 | -1.6808 |
| CHB | NPIP | 43801070 | 2.3946 | 6.0989 | -1.7486 |
| CHB | NPIP | 43806070 | 2.6535 | 6.946  | -1.8018 |
| CHB | NPIP | 43811070 | 1.9617 | 5.9295 | -1.9209 |
| CHB | NPIP | 43816070 | 1.944  | 5.7601 | -1.8959 |
| CHB | NPIP | 43821070 | 3.4386 | 6.0989 | -1.2558 |
| CHB | NPIP | 43826070 | 3.1317 | 4.913  | -1.0189 |
| CHB | NPIP | 43831070 | 1.608  | 3.7271 | -1.5395 |
| CHB | NPIP | 43836070 | 3.2555 | 5.5907 | -1.1915 |
| CHB | NPIP | 43841070 | 6.6469 | 7.4543 | -0.3178 |
| CHB | NPIP | 43846070 | 4.916  | 6.0989 | -0.5584 |
| CHB | NPIP | 43851070 | 1.6975 | 4.7436 | -1.7968 |
| CHB | NPIP | 43856070 | 4.0948 | 7.2848 | -1.2823 |
| CHB | NPIP | 43861070 | 4.3617 | 8.3013 | -1.405  |
| CHB | NPIP | 43866070 | 2.217  | 5.5907 | -1.7213 |
| CHB | NPIP | 43871070 | 2.5479 | 5.4213 | -1.5067 |
| CHB | NPIP | 43876070 | 5.2996 | 6.6072 | -0.5743 |
| CHB | NPIP | 43881070 | 6.2949 | 5.9295 | 0.1769  |
| CHB | NPIP | 43886070 | 3.8675 | 5.7601 | -0.9403 |
| CHB | NPIP | 43891070 | 1.6585 | 5.4213 | -1.9731 |
| CHB | NPIP | 43896070 | 1.2144 | 4.913  | -2.1156 |
| CHB | NPIP | 43901070 | 2.3044 | 6.0989 | -1.7912 |
| CHB | NPIP | 43906070 | 3.2583 | 7.1154 | -1.584  |
| CHB | NPIP | 43911070 | 2.8942 | 6.4378 | -1.5933 |

## 2\_TajimasD\_data

|     |      |          |         |         |         |
|-----|------|----------|---------|---------|---------|
| CHB | NPIP | 43916070 | 3.6185  | 7.6237  | -1.5445 |
| CHB | NPIP | 43921070 | 3.3501  | 7.4543  | -1.6155 |
| CHB | NPIP | 43926070 | 3.8686  | 6.4378  | -1.1552 |
| CHB | NPIP | 43931070 | 3.8399  | 6.4378  | -1.1681 |
| CHB | NPIP | 43936070 | 1.5454  | 6.2684  | -2.1752 |
| CHB | NPIP | 43941070 | 3.3651  | 6.946   | -1.5031 |
| CHB | NPIP | 43946070 | 4.06    | 6.4378  | -1.0691 |
| CHB | NPIP | 43951070 | 2.9905  | 5.2519  | -1.2196 |
| CHB | NPIP | 43956070 | 4.9515  | 5.5907  | -0.3261 |
| CHB | NPIP | 43961070 | 5.5003  | 6.2684  | -0.3538 |
| CHB | NPIP | 43966070 | 4.3069  | 5.9295  | -0.7855 |
| CHB | NPIP | 43971070 | 4.3859  | 6.6072  | -0.9756 |
| CHB | NPIP | 43976070 | 8.9172  | 8.4708  | 0.1563  |
| CHB | NPIP | 43981070 | 10.933  | 9.3178  | 0.5177  |
| CHB | NPIP | 43986070 | 6.209   | 9.6567  | -1.0691 |
| CHB | NPIP | 43991070 | 3.5913  | 7.7931  | -1.5881 |
| CHB | NPIP | 43996070 | 3.3678  | 6.0989  | -1.2892 |
| CHB | NPIP | 44001070 | 3.6196  | 7.6237  | -1.5441 |
| CHB | NPIP | 44006070 | 4.8639  | 9.1484  | -1.3969 |
| CHB | NPIP | 44011070 | 7.7906  | 10.6731 | -0.8141 |
| CHB | NPIP | 44016070 | 7.6552  | 10.6731 | -0.8524 |
| CHB | NPIP | 44021070 | 8.2939  | 10.3343 | -0.5939 |
| CHB | NPIP | 44026070 | 8.2515  | 9.6567  | -0.4357 |
| CHB | NPIP | 44031070 | 7.4047  | 8.6402  | -0.4247 |
| CHB | NPIP | 44036070 | 11.5867 | 9.9955  | 0.4778  |
| CHB | NPIP | 44041070 | 12.2026 | 12.1979 | 0.0012  |
| CHB | NPIP | 44046070 | 10.8841 | 10.8426 | 0.0115  |
| CHB | NPIP | 44051070 | 15.3267 | 10.3343 | 1.4532  |
| CHB | NPIP | 44056070 | 21.1744 | 13.3838 | 1.778   |
| CHB | NPIP | 44061070 | 20.0842 | 12.8755 | 1.7066  |
| CHB | NPIP | 44066070 | 13.6928 | 8.3013  | 1.9229  |
| CHB | NPIP | 44071070 | 8.7919  | 7.2848  | 0.6058  |
| CHB | NPIP | 44076070 | 8.426   | 8.1319  | 0.1069  |
| CHB | NPIP | 44081070 | 10.6937 | 9.1484  | 0.5038  |
| CHB | NPIP | 44086070 | 9.6446  | 9.8261  | -0.0554 |
| CHB | NPIP | 44091070 | 7.9239  | 7.7931  | 0.0494  |
| CHB | NPIP | 44096070 | 12.0506 | 9.9955  | 0.6171  |
| CHB | NPIP | 44101070 | 16.3451 | 12.8755 | 0.8214  |
| CHB | NPIP | 44106070 | 14.7096 | 11.1814 | 0.954   |
| CHB | NPIP | 44111070 | 14.9763 | 10.1649 | 1.4223  |
| CHB | NPIP | 44116070 | 12.0491 | 7.2848  | 1.9151  |
| CHB | NPIP | 44121070 | 8.6096  | 7.2848  | 0.5325  |
| CHB | NPIP | 44126070 | 10.0902 | 10.5037 | -0.1185 |
| CHB | NPIP | 44131070 | 7.6541  | 9.1484  | -0.4872 |
| CHB | NPIP | 44136070 | 4.5125  | 6.4378  | -0.8657 |
| CHB | NPIP | 44141070 | 2.7533  | 5.0825  | -1.2931 |
| CHB | NPIP | 44146070 | 3.289   | 4.5742  | -0.7826 |
| CHB | NPIP | 44151070 | 6.3554  | 5.2519  | 0.5952  |
| CHB | NPIP | 44156070 | 5.2854  | 5.4213  | -0.0713 |

## 2\_TajimasD\_data

|     |      |          |         |         |         |
|-----|------|----------|---------|---------|---------|
| CHB | NPIP | 44161070 | 3.2043  | 5.2519  | -1.1043 |
| CHB | NPIP | 44166070 | 2.7881  | 5.2519  | -1.3288 |
| CHB | NPIP | 44171070 | 2.774   | 4.4048  | -1.0262 |
| CHB | NPIP | 44176070 | 4.6859  | 5.9295  | -0.602  |
| CHB | NPIP | 44181070 | 7.206   | 7.9625  | -0.2803 |
| CHB | NPIP | 44186070 | 7.7028  | 7.6237  | 0.0305  |
| CHB | NPIP | 44191070 | 7.6453  | 6.946   | 0.2935  |
| CHB | NPIP | 44196070 | 10.4812 | 8.1319  | 0.8539  |
| CHB | NPIP | 44201070 | 8.5778  | 7.6237  | 0.3679  |
| CHB | NPIP | 44206070 | 7.9136  | 7.4543  | 0.1808  |
| CHB | NPIP | 44211070 | 14.2014 | 9.8261  | 1.3349  |
| CHB | NPIP | 44216070 | 13.9229 | 8.8096  | 1.7264  |
| CHB | NPIP | 44221070 | 11.9298 | 8.4708  | 1.2109  |
| CHB | NPIP | 44226070 | 10.3052 | 7.7931  | 0.9494  |
| CHB | NPIP | 44231070 | 8.5128  | 7.2848  | 0.4936  |
| CHB | NPIP | 44236070 | 9.8837  | 9.1484  | 0.2397  |
| CHB | NPIP | 44241070 | 10.0392 | 7.4543  | 1.0175  |
| CHB | NPIP | 44246070 | 9.3952  | 7.2848  | 0.8483  |
| CHB | NPIP | 44251070 | 9.4597  | 8.979   | 0.1595  |
| CHB | NPIP | 44256070 | 10.6903 | 8.979   | 0.5677  |
| CHB | NPIP | 44261070 | 9.6292  | 7.6237  | 0.7734  |
| CHB | NPIP | 44266070 | 10.9694 | 7.2848  | 1.4811  |
| CHB | NPIP | 44271070 | 12.13   | 7.9625  | 1.5443  |
| CHB | NPIP | 44276070 | 11.0484 | 7.6237  | 1.3207  |
| CHB | NPIP | 44281070 | 9.0154  | 8.1319  | 0.3211  |
| CHB | NPIP | 44286070 | 7.305   | 7.9625  | -0.2436 |
| CHB | NPIP | 44291070 | 6.6254  | 7.2848  | -0.2651 |
| CHB | NPIP | 44296070 | 6.191   | 6.6072  | -0.1828 |
| CHB | NPIP | 44301070 | 5.7309  | 6.6072  | -0.3849 |
| CHB | NPIP | 44306070 | 5.802   | 6.4378  | -0.2859 |
| CHB | NPIP | 44311070 | 7.5877  | 6.946   | 0.2694  |
| CHB | NPIP | 44316070 | 9.0089  | 9.3178  | -0.099  |
| CHB | NPIP | 44321070 | 9.3775  | 9.3178  | 0.0191  |
| CHB | NPIP | 44326070 | 7.0345  | 6.7766  | 0.1107  |
| CHB | NPIP | 44331070 | 4.3767  | 5.2519  | -0.472  |
| CHB | NPIP | 44336070 | 4.0588  | 6.4378  | -1.0697 |
| CHB | NPIP | 44341070 | 4.6235  | 5.9295  | -0.6323 |
| CHB | NPIP | 44346070 | 4.898   | 4.7436  | 0.0911  |
| CHB | NPIP | 44351070 | 5.7283  | 6.4378  | -0.319  |
| CHB | NPIP | 44356070 | 4.4769  | 6.946   | -1.0364 |
| CHB | NPIP | 44361070 | 4.8223  | 6.946   | -0.8914 |
| CHB | NPIP | 44366070 | 8.1819  | 7.6237  | 0.2153  |
| CHB | NPIP | 44371070 | 7.1283  | 9.1484  | -0.6586 |
| CHB | NPIP | 44376070 | 7.5667  | 10.8426 | -0.9117 |
| CHB | NPIP | 44381070 | 8.8837  | 9.8261  | -0.2875 |
| CHB | NPIP | 44386070 | 8.217   | 9.4872  | -0.4004 |
| CHB | NPIP | 44391070 | 9.5665  | 10.3343 | -0.2235 |
| CHB | NPIP | 44396070 | 7.2886  | 8.979   | -0.5608 |
| CHB | NPIP | 44401070 | 6.5928  | 7.4543  | -0.3391 |

## 2\_TajimasD\_data

|     |      |          |         |         |         |
|-----|------|----------|---------|---------|---------|
| CHB | NPIP | 44406070 | 8.032   | 7.2848  | 0.3003  |
| CHB | NPIP | 44411070 | 6.3345  | 6.946   | -0.2567 |
| CHB | NPIP | 44416070 | 4.7192  | 6.4378  | -0.7727 |
| CHB | NPIP | 44421070 | 4.1622  | 5.2519  | -0.5877 |
| CHB | NPIP | 44426070 | 4.5652  | 6.0989  | -0.724  |
| CHB | NPIP | 44431070 | 4.3863  | 6.7766  | -1.0261 |
| CHB | NPIP | 44436070 | 4.3373  | 5.5907  | -0.6395 |
| CHB | NPIP | 44441070 | 3.8877  | 5.9295  | -0.9885 |
| CHB | NPIP | 44446070 | 4.2578  | 7.1154  | -1.1735 |
| CHB | NPIP | 44451070 | 6.2258  | 7.4543  | -0.4836 |
| CHB | NPIP | 44456070 | 6.6526  | 5.5907  | 0.5418  |
| CHB | NPIP | 44461070 | 4.826   | 5.9295  | -0.5342 |
| CHB | NPIP | 44466070 | 3.9414  | 8.1319  | -1.5231 |
| CHB | NPIP | 44471070 | 4.8812  | 8.6402  | -1.2921 |
| CHB | NPIP | 44476070 | 4.5452  | 7.7931  | -1.2275 |
| CHB | NPIP | 44481070 | 3.1359  | 8.4708  | -1.8676 |
| CHB | NPIP | 44486070 | 3.9155  | 10.6731 | -1.9086 |
| CHB | NPIP | 44491070 | 5.2802  | 9.9955  | -1.4159 |
| CHB | NPIP | 44496070 | 6.3975  | 8.3013  | -0.679  |
| CHB | NPIP | 44501070 | 7.331   | 7.7931  | -0.1746 |
| CHB | NPIP | 44506070 | 6.8469  | 8.4708  | -0.5685 |
| CHB | NPIP | 44511070 | 8.0527  | 8.4708  | -0.1464 |
| CHB | NPIP | 44516070 | 8.1582  | 7.1154  | 0.4282  |
| CHB | NPIP | 44521070 | 6.3805  | 7.2848  | -0.3635 |
| CHB | NPIP | 44526070 | 6.7782  | 6.7766  | 0.0007  |
| CHB | NPIP | 44531070 | 9.9229  | 9.8261  | 0.0295  |
| CHB | NPIP | 44536070 | 11.528  | 14.4003 | -0.6115 |
| CHB | NPIP | 44541070 | 9.1874  | 11.6896 | -0.6489 |
| CHB | NPIP | 44546070 | 7.2503  | 8.4708  | -0.4273 |
| CHB | NPIP | 44551070 | 6.2374  | 8.3013  | -0.7361 |
| CHB | NPIP | 44556070 | 14.1527 | 11.8591 | 0.5868  |
| CHB | NPIP | 44561070 | 35.3219 | 21.1769 | 2.0809  |
| CHB | NPIP | 44566070 | 42.6712 | 24.3958 | 2.3446  |
| CHB | NPIP | 44571070 | 24.198  | 16.9415 | 1.323   |
| CHB | NPIP | 44576070 | 10.1513 | 12.0285 | -0.4739 |
| CHB | NPIP | 44581070 | 9.2994  | 11.8591 | -0.6549 |
| CHB | NPIP | 44586070 | 9.2496  | 11.5202 | -0.597  |
| CHB | NPIP | 44591070 | 11.4558 | 13.3838 | -0.44   |
| CHB | NPIP | 44596070 | 11.6157 | 12.5367 | -0.2236 |
| CHB | NPIP | 44601070 | 12.0289 | 10.3343 | 0.4933  |
| CHB | NPIP | 44606070 | 13.8852 | 12.5367 | 0.3274  |
| CHB | NPIP | 44611070 | 8.585   | 11.012  | -0.6657 |
| CHB | NPIP | 44616070 | 4.3644  | 7.2848  | -1.1739 |
| CHB | NPIP | 44621070 | 5.2385  | 7.4543  | -0.8722 |
| CHB | NPIP | 44626070 | 4.775   | 7.9625  | -1.1812 |
| CHB | NPIP | 44631070 | 4.7611  | 8.1319  | -1.2252 |
| CHB | NPIP | 44636070 | 5.2184  | 7.1154  | -0.779  |
| CHB | NPIP | 44641070 | 3.3168  | 5.7601  | -1.2139 |
| CHB | NPIP | 44646070 | 6.4245  | 8.4708  | -0.7164 |



## 2\_TajimasD\_data

|     |      |          |         |         |         |
|-----|------|----------|---------|---------|---------|
| CHB | NPIP | 44651070 | 7.0345  | 8.3013  | -0.4518 |
| CHB | NPIP | 44656070 | 2.9109  | 5.7601  | -1.4155 |
| CHB | NPIP | 44661070 | 3.957   | 5.7601  | -0.8958 |
| CHB | NPIP | 44666070 | 5.047   | 5.5907  | -0.2774 |
| CHB | NPIP | 44671070 | 4.7095  | 6.6072  | -0.8335 |
| CHB | NPIP | 44676070 | 3.795   | 7.2848  | -1.4028 |
| CHB | NPIP | 44681070 | 3.699   | 6.6072  | -1.2773 |
| CHB | NPIP | 44686070 | 3.7651  | 7.4543  | -1.4522 |
| CHB | NPIP | 44691070 | 3.5391  | 7.1154  | -1.4687 |
| CHB | NPIP | 44696070 | 2.8947  | 6.2684  | -1.5538 |
| CHB | NPIP | 44701070 | 2.9048  | 7.6237  | -1.8197 |
| CHB | NPIP | 44706070 | 4.9928  | 8.1319  | -1.141  |
| CHB | NPIP | 44711070 | 3.9673  | 6.7766  | -1.2059 |
| CHB | NPIP | 44716070 | 2.0978  | 5.9295  | -1.855  |
| CHB | NPIP | 44721070 | 4.1921  | 6.4378  | -1.0097 |
| CHB | NPIP | 44726070 | 5.6514  | 7.2848  | -0.6566 |
| CHB | NPIP | 44731070 | 3.9549  | 7.2848  | -1.3385 |
| CHB | NPIP | 44736070 | 3.985   | 6.4378  | -1.1029 |
| CHB | NPIP | 44741070 | 5.0314  | 7.1154  | -0.8558 |
| CHB | NPIP | 44746070 | 3.4417  | 5.9295  | -1.2044 |
| CHB | NPIP | 44751070 | 4.8068  | 5.5907  | -0.4    |
| CHB | NPIP | 44756070 | 6.3248  | 6.4378  | -0.0508 |
| CHB | NPIP | 44761070 | 4.3969  | 6.0989  | -0.8034 |
| CHB | NPIP | 44766070 | 5.6307  | 8.4708  | -0.9942 |
| CHB | NPIP | 44771070 | 6.1673  | 8.4708  | -0.8064 |
| CHB | NPIP | 44776070 | 4.5989  | 6.6072  | -0.8821 |
| CHB | NPIP | 44781070 | 4.0512  | 5.4213  | -0.7184 |
| CHB | NPIP | 44786070 | 2.7276  | 5.4213  | -1.4125 |
| CHB | NPIP | 44791070 | 2.1949  | 6.0989  | -1.8429 |
| CHB | NPIP | 44796070 | 3.1279  | 6.6072  | -1.5281 |
| CHB | NPIP | 44801070 | 5.752   | 8.3013  | -0.9092 |
| CHB | NPIP | 44806070 | 7.5957  | 8.3013  | -0.2517 |
| CHB | NPIP | 44811070 | 4.7333  | 6.4378  | -0.7664 |
| CHB | NPIP | 44816070 | 2.7771  | 5.0825  | -1.2799 |
| CHB | NPIP | 44821070 | 4.056   | 6.2684  | -1.019  |
| CHB | NPIP | 44826070 | 5.462   | 7.6237  | -0.8336 |
| CHB | NPIP | 44831070 | 5.0293  | 8.3013  | -1.1669 |
| CHB | NPIP | 44836070 | 4.2183  | 10.6731 | -1.8231 |
| CHB | NPIP | 44841070 | 4.3319  | 11.5202 | -1.8899 |
| CHB | NPIP | 44846070 | 3.3036  | 9.3178  | -1.9278 |
| YRI | NPIP | 43726070 | 8.4142  | 14.4534 | -1.277  |
| YRI | NPIP | 43731070 | 7.7697  | 12.7727 | -1.1894 |
| YRI | NPIP | 43736070 | 7.0628  | 11.9324 | -1.2344 |
| YRI | NPIP | 43741070 | 9.5423  | 12.2685 | -0.6732 |
| YRI | NPIP | 43746070 | 10.8128 | 12.7727 | -0.4659 |
| YRI | NPIP | 43751070 | 9.2904  | 11.9324 | -0.6697 |
| YRI | NPIP | 43756070 | 9.1034  | 12.1005 | -0.7498 |
| YRI | NPIP | 43761070 | 9.1849  | 11.5963 | -0.6279 |
| YRI | NPIP | 43766070 | 7.7114  | 10.756  | -0.8508 |

## 2\_TajimasD\_data

|     |      |          |         |         |         |
|-----|------|----------|---------|---------|---------|
| YRI | NPIP | 43771070 | 7.3162  | 11.4282 | -1.0856 |
| YRI | NPIP | 43776070 | 5.4804  | 10.756  | -1.4743 |
| YRI | NPIP | 43781070 | 3.1523  | 7.8989  | -1.7658 |
| YRI | NPIP | 43786070 | 4.2553  | 8.067   | -1.3909 |
| YRI | NPIP | 43791070 | 4.7238  | 9.2434  | -1.4545 |
| YRI | NPIP | 43796070 | 2.6401  | 7.8989  | -1.9564 |
| YRI | NPIP | 43801070 | 3.9406  | 9.2434  | -1.7066 |
| YRI | NPIP | 43806070 | 4.7393  | 10.5879 | -1.6586 |
| YRI | NPIP | 43811070 | 2.8714  | 7.5628  | -1.8162 |
| YRI | NPIP | 43816070 | 1.9419  | 5.378   | -1.8083 |
| YRI | NPIP | 43821070 | 4.5152  | 9.0754  | -1.4928 |
| YRI | NPIP | 43826070 | 4.7464  | 9.2434  | -1.4473 |
| YRI | NPIP | 43831070 | 2.5895  | 7.2267  | -1.8712 |
| YRI | NPIP | 43836070 | 3.5871  | 7.8989  | -1.6041 |
| YRI | NPIP | 43841070 | 6.543   | 9.4115  | -0.9079 |
| YRI | NPIP | 43846070 | 5.9176  | 8.4031  | -0.8736 |
| YRI | NPIP | 43851070 | 2.5794  | 4.8738  | -1.3171 |
| YRI | NPIP | 43856070 | 4.982   | 6.8906  | -0.8042 |
| YRI | NPIP | 43861070 | 6.0874  | 9.9157  | -1.1542 |
| YRI | NPIP | 43866070 | 3.7378  | 7.8989  | -1.548  |
| YRI | NPIP | 43871070 | 3.5022  | 7.3947  | -1.5381 |
| YRI | NPIP | 43876070 | 6.3013  | 10.4199 | -1.1856 |
| YRI | NPIP | 43881070 | 6.8523  | 11.0921 | -1.1511 |
| YRI | NPIP | 43886070 | 5.1235  | 11.2602 | -1.6428 |
| YRI | NPIP | 43891070 | 3.3247  | 8.7392  | -1.8354 |
| YRI | NPIP | 43896070 | 2.4553  | 7.3947  | -1.9518 |
| YRI | NPIP | 43901070 | 3.7322  | 8.9073  | -1.7236 |
| YRI | NPIP | 43906070 | 3.3605  | 9.0754  | -1.8707 |
| YRI | NPIP | 43911070 | 2.3612  | 7.8989  | -2.0602 |
| YRI | NPIP | 43916070 | 4.7605  | 8.4031  | -1.2802 |
| YRI | NPIP | 43921070 | 6.0808  | 9.9157  | -1.1562 |
| YRI | NPIP | 43926070 | 6.876   | 9.9157  | -0.9165 |
| YRI | NPIP | 43931070 | 5.7801  | 9.7476  | -1.2154 |
| YRI | NPIP | 43936070 | 2.3745  | 7.7309  | -2.0324 |
| YRI | NPIP | 43941070 | 3.6376  | 8.7392  | -1.7293 |
| YRI | NPIP | 43946070 | 5.5059  | 10.5879 | -1.4412 |
| YRI | NPIP | 43951070 | 5.7651  | 10.5879 | -1.3677 |
| YRI | NPIP | 43956070 | 8.2492  | 10.5879 | -0.6632 |
| YRI | NPIP | 43961070 | 8.6726  | 10.0837 | -0.4188 |
| YRI | NPIP | 43966070 | 7.195   | 11.7644 | -1.1739 |
| YRI | NPIP | 43971070 | 7.4109  | 11.5963 | -1.0899 |
| YRI | NPIP | 43976070 | 11.6332 | 12.6047 | -0.2339 |
| YRI | NPIP | 43981070 | 15.4489 | 14.7895 | 0.1364  |
| YRI | NPIP | 43986070 | 12.7723 | 13.7811 | -0.2232 |
| YRI | NPIP | 43991070 | 8.7972  | 13.613  | -1.0779 |
| YRI | NPIP | 43996070 | 6.2913  | 13.7811 | -1.657  |
| YRI | NPIP | 44001070 | 4.5273  | 13.613  | -2.0336 |
| YRI | NPIP | 44006070 | 5.5391  | 14.4534 | -1.8849 |
| YRI | NPIP | 44011070 | 9.6851  | 16.9743 | -1.3221 |

## 2\_TajimasD\_data

|     |      |          |         |         |         |
|-----|------|----------|---------|---------|---------|
| YRI | NPIP | 44016070 | 10.9594 | 17.6465 | -1.1685 |
| YRI | NPIP | 44021070 | 12.2609 | 16.6382 | -0.8093 |
| YRI | NPIP | 44026070 | 10.5828 | 13.7811 | -0.7076 |
| YRI | NPIP | 44031070 | 7.4486  | 11.0921 | -0.9892 |
| YRI | NPIP | 44036070 | 8.8342  | 12.6047 | -0.9077 |
| YRI | NPIP | 44041070 | 10.6037 | 13.2769 | -0.6127 |
| YRI | NPIP | 44046070 | 11.6067 | 14.6214 | -0.6305 |
| YRI | NPIP | 44051070 | 11.5774 | 17.8146 | -1.0801 |
| YRI | NPIP | 44056070 | 14.425  | 18.4868 | -0.6788 |
| YRI | NPIP | 44061070 | 13.5305 | 18.3188 | -0.8072 |
| YRI | NPIP | 44066070 | 9.1128  | 14.9575 | -1.1962 |
| YRI | NPIP | 44071070 | 7.1599  | 11.7644 | -1.1829 |
| YRI | NPIP | 44076070 | 7.9828  | 13.1089 | -1.1891 |
| YRI | NPIP | 44081070 | 9.827   | 14.4534 | -0.9782 |
| YRI | NPIP | 44086070 | 9.3587  | 13.7811 | -0.9784 |
| YRI | NPIP | 44091070 | 8.9431  | 12.6047 | -0.8815 |
| YRI | NPIP | 44096070 | 10.4691 | 14.9575 | -0.9186 |
| YRI | NPIP | 44101070 | 12.3438 | 16.134  | -0.7216 |
| YRI | NPIP | 44106070 | 10.5521 | 14.6214 | -0.851  |
| YRI | NPIP | 44111070 | 10.5284 | 14.6214 | -0.856  |
| YRI | NPIP | 44116070 | 9.8115  | 12.2685 | -0.6068 |
| YRI | NPIP | 44121070 | 7.6579  | 12.4366 | -1.165  |
| YRI | NPIP | 44126070 | 10.0692 | 14.2853 | -0.9014 |
| YRI | NPIP | 44131070 | 8.484   | 11.5963 | -0.8105 |
| YRI | NPIP | 44136070 | 4.4451  | 9.4115  | -1.5718 |
| YRI | NPIP | 44141070 | 3.6615  | 8.235   | -1.6376 |
| YRI | NPIP | 44146070 | 3.7919  | 9.0754  | -1.7295 |
| YRI | NPIP | 44151070 | 6.8364  | 11.9324 | -1.2918 |
| YRI | NPIP | 44156070 | 6.7705  | 9.7476  | -0.912  |
| YRI | NPIP | 44161070 | 5.1957  | 8.9073  | -1.2362 |
| YRI | NPIP | 44166070 | 6.6109  | 11.0921 | -1.2167 |
| YRI | NPIP | 44171070 | 7.508   | 11.7644 | -1.0935 |
| YRI | NPIP | 44176070 | 8.2872  | 11.2602 | -0.7959 |
| YRI | NPIP | 44181070 | 11.028  | 12.7727 | -0.4148 |
| YRI | NPIP | 44186070 | 10.4895 | 14.6214 | -0.8641 |
| YRI | NPIP | 44191070 | 8.9854  | 11.5963 | -0.6799 |
| YRI | NPIP | 44196070 | 12.9895 | 13.2769 | -0.0659 |
| YRI | NPIP | 44201070 | 11.571  | 14.9575 | -0.6931 |
| YRI | NPIP | 44206070 | 10.2977 | 13.9492 | -0.7986 |
| YRI | NPIP | 44211070 | 15.1471 | 17.6465 | -0.4368 |
| YRI | NPIP | 44216070 | 14.7798 | 16.9743 | -0.398  |
| YRI | NPIP | 44221070 | 13.16   | 16.8062 | -0.6676 |
| YRI | NPIP | 44226070 | 10.9342 | 16.134  | -0.99   |
| YRI | NPIP | 44231070 | 11.6053 | 15.1256 | -0.7128 |
| YRI | NPIP | 44236070 | 11.4144 | 14.9575 | -0.7251 |
| YRI | NPIP | 44241070 | 8.7786  | 13.1089 | -1.0045 |
| YRI | NPIP | 44246070 | 11.2087 | 14.9575 | -0.7672 |
| YRI | NPIP | 44251070 | 11.9386 | 14.7895 | -0.5898 |
| YRI | NPIP | 44256070 | 11.8281 | 12.6047 | -0.1869 |

## 2\_TajimasD\_data

|     |      |          |         |         |         |
|-----|------|----------|---------|---------|---------|
| YRI | NPIP | 44261070 | 10.2341 | 10.0837 | 0.0446  |
| YRI | NPIP | 44266070 | 9.4677  | 10.2518 | -0.2292 |
| YRI | NPIP | 44271070 | 11.1153 | 11.9324 | -0.2071 |
| YRI | NPIP | 44276070 | 11.5391 | 11.9324 | -0.0997 |
| YRI | NPIP | 44281070 | 11.2655 | 12.1005 | -0.2089 |
| YRI | NPIP | 44286070 | 9.3449  | 10.756  | -0.3943 |
| YRI | NPIP | 44291070 | 7.6584  | 8.9073  | -0.416  |
| YRI | NPIP | 44296070 | 7.1872  | 9.0754  | -0.6181 |
| YRI | NPIP | 44301070 | 7.7381  | 10.0837 | -0.6962 |
| YRI | NPIP | 44306070 | 7.2029  | 9.2434  | -0.6567 |
| YRI | NPIP | 44311070 | 7.9585  | 9.5795  | -0.5047 |
| YRI | NPIP | 44316070 | 8.8778  | 12.6047 | -0.8972 |
| YRI | NPIP | 44321070 | 9.4339  | 12.6047 | -0.7633 |
| YRI | NPIP | 44326070 | 10.0792 | 10.756  | -0.1891 |
| YRI | NPIP | 44331070 | 9.7718  | 11.0921 | -0.3585 |
| YRI | NPIP | 44336070 | 8.4826  | 11.4282 | -0.7776 |
| YRI | NPIP | 44341070 | 6.9181  | 11.2602 | -1.1624 |
| YRI | NPIP | 44346070 | 7.4291  | 12.6047 | -1.2459 |
| YRI | NPIP | 44351070 | 7.266   | 11.5963 | -1.1276 |
| YRI | NPIP | 44356070 | 6.4876  | 9.9157  | -1.0336 |
| YRI | NPIP | 44361070 | 6.9464  | 9.9157  | -0.8952 |
| YRI | NPIP | 44366070 | 7.6134  | 10.5879 | -0.8436 |
| YRI | NPIP | 44371070 | 6.9677  | 12.7727 | -1.3801 |
| YRI | NPIP | 44376070 | 9.1412  | 16.302  | -1.35   |
| YRI | NPIP | 44381070 | 10.7759 | 15.6298 | -0.9526 |
| YRI | NPIP | 44386070 | 11.319  | 13.7811 | -0.5447 |
| YRI | NPIP | 44391070 | 11.4621 | 13.613  | -0.4814 |
| YRI | NPIP | 44396070 | 9.0184  | 14.1172 | -1.1025 |
| YRI | NPIP | 44401070 | 7.6974  | 13.2769 | -1.2787 |
| YRI | NPIP | 44406070 | 8.3318  | 11.5963 | -0.8501 |
| YRI | NPIP | 44411070 | 7.0382  | 9.7476  | -0.83   |
| YRI | NPIP | 44416070 | 5.4133  | 9.4115  | -1.2654 |
| YRI | NPIP | 44421070 | 4.8176  | 9.5795  | -1.4825 |
| YRI | NPIP | 44426070 | 5.2259  | 8.5712  | -1.1545 |
| YRI | NPIP | 44431070 | 5.8713  | 9.7476  | -1.1875 |
| YRI | NPIP | 44436070 | 5.539   | 8.7392  | -1.0848 |
| YRI | NPIP | 44441070 | 6.0173  | 7.8989  | -0.7    |
| YRI | NPIP | 44446070 | 6.5133  | 9.4115  | -0.9173 |
| YRI | NPIP | 44451070 | 7.175   | 12.1005 | -1.2323 |
| YRI | NPIP | 44456070 | 7.062   | 12.9408 | -1.3804 |
| YRI | NPIP | 44461070 | 5.7345  | 11.0921 | -1.4546 |
| YRI | NPIP | 44466070 | 7.2776  | 11.0921 | -1.0357 |
| YRI | NPIP | 44471070 | 9.856   | 12.9408 | -0.7244 |
| YRI | NPIP | 44476070 | 7.3638  | 11.9324 | -1.1581 |
| YRI | NPIP | 44481070 | 7.0713  | 11.2602 | -1.1214 |
| YRI | NPIP | 44486070 | 9.0226  | 11.5963 | -0.6702 |
| YRI | NPIP | 44491070 | 8.6173  | 11.5963 | -0.7757 |
| YRI | NPIP | 44496070 | 7.9746  | 12.4366 | -1.0878 |
| YRI | NPIP | 44501070 | 8.108   | 12.4366 | -1.0553 |

## 2\_TajimasD\_data

|     |      |          |         |         |         |
|-----|------|----------|---------|---------|---------|
| YRI | NPIP | 44506070 | 8.9117  | 12.2685 | -0.829  |
| YRI | NPIP | 44511070 | 9.6618  | 11.2602 | -0.4279 |
| YRI | NPIP | 44516070 | 10.1254 | 9.5795  | 0.17    |
| YRI | NPIP | 44521070 | 8.3553  | 10.4199 | -0.5943 |
| YRI | NPIP | 44526070 | 7.6305  | 10.0837 | -0.7281 |
| YRI | NPIP | 44531070 | 14.1839 | 13.1089 | 0.2494  |
| YRI | NPIP | 44536070 | 18.1105 | 18.4868 | -0.0629 |
| YRI | NPIP | 44541070 | 13.3296 | 15.4617 | -0.4228 |
| YRI | NPIP | 44546070 | 10.266  | 12.1005 | -0.459  |
| YRI | NPIP | 44551070 | 8.0931  | 11.0921 | -0.8142 |
| YRI | NPIP | 44556070 | 13.0582 | 15.1256 | -0.4186 |
| YRI | NPIP | 44561070 | 25.7818 | 25.3774 | 0.0498  |
| YRI | NPIP | 44566070 | 28.3731 | 27.8983 | 0.0533  |
| YRI | NPIP | 44571070 | 17.166  | 20.8397 | -0.547  |
| YRI | NPIP | 44576070 | 9.9581  | 15.4617 | -1.0913 |
| YRI | NPIP | 44581070 | 10.0773 | 14.6214 | -0.9503 |
| YRI | NPIP | 44586070 | 9.019   | 14.6214 | -1.1716 |
| YRI | NPIP | 44591070 | 11.6859 | 16.9743 | -0.9592 |
| YRI | NPIP | 44596070 | 13.3247 | 17.3104 | -0.7094 |
| YRI | NPIP | 44601070 | 12.5512 | 15.2937 | -0.5495 |
| YRI | NPIP | 44606070 | 14.2394 | 14.7895 | -0.1138 |
| YRI | NPIP | 44611070 | 11.0057 | 15.9659 | -0.9539 |
| YRI | NPIP | 44616070 | 5.9712  | 14.1172 | -1.7614 |
| YRI | NPIP | 44621070 | 6.3924  | 12.2685 | -1.4511 |
| YRI | NPIP | 44626070 | 6.2051  | 11.7644 | -1.4282 |
| YRI | NPIP | 44631070 | 5.8731  | 10.2518 | -1.2798 |
| YRI | NPIP | 44636070 | 6.2012  | 10.0837 | -1.1524 |
| YRI | NPIP | 44641070 | 5.0287  | 7.8989  | -1.0678 |
| YRI | NPIP | 44646070 | 8.9894  | 9.5795  | -0.1837 |
| YRI | NPIP | 44651070 | 9.4617  | 10.0837 | -0.1846 |
| YRI | NPIP | 44656070 | 4.8916  | 8.067   | -1.1587 |
| YRI | NPIP | 44661070 | 4.9759  | 9.0754  | -1.342  |
| YRI | NPIP | 44666070 | 5.4185  | 8.9073  | -1.162  |
| YRI | NPIP | 44671070 | 5.231   | 9.0754  | -1.2584 |
| YRI | NPIP | 44676070 | 4.3501  | 9.5795  | -1.6281 |
| YRI | NPIP | 44681070 | 4.1069  | 10.0837 | -1.774  |
| YRI | NPIP | 44686070 | 4.1031  | 11.2602 | -1.916  |
| YRI | NPIP | 44691070 | 4.2553  | 10.924  | -1.8367 |
| YRI | NPIP | 44696070 | 3.648   | 8.7392  | -1.7258 |
| YRI | NPIP | 44701070 | 2.6523  | 7.3947  | -1.874  |
| YRI | NPIP | 44706070 | 4.2758  | 7.7309  | -1.311  |
| YRI | NPIP | 44711070 | 4.1898  | 8.7392  | -1.5421 |
| YRI | NPIP | 44716070 | 2.6546  | 8.5712  | -2.0418 |
| YRI | NPIP | 44721070 | 5.2155  | 7.5628  | -0.9087 |
| YRI | NPIP | 44726070 | 7.418   | 7.8989  | -0.1789 |
| YRI | NPIP | 44731070 | 5.3215  | 8.067   | -1.0018 |
| YRI | NPIP | 44736070 | 4.1896  | 8.235   | -1.4485 |
| YRI | NPIP | 44741070 | 5.2919  | 9.5795  | -1.3349 |
| YRI | NPIP | 44746070 | 4.6688  | 8.5712  | -1.3467 |

## 2\_TajimasD\_data

|     |      |          |         |         |         |
|-----|------|----------|---------|---------|---------|
| YRI | NPIP | 44751070 | 6.1518  | 7.5628  | -0.5462 |
| YRI | NPIP | 44756070 | 7.1811  | 9.2434  | -0.6637 |
| YRI | NPIP | 44761070 | 5.3017  | 10.756  | -1.5242 |
| YRI | NPIP | 44766070 | 7.6842  | 12.1005 | -1.1049 |
| YRI | NPIP | 44771070 | 7.7704  | 10.924  | -0.8686 |
| YRI | NPIP | 44776070 | 4.8539  | 9.0754  | -1.3819 |
| YRI | NPIP | 44781070 | 3.9932  | 10.0837 | -1.8078 |
| YRI | NPIP | 44786070 | 3.4502  | 8.7392  | -1.7928 |
| YRI | NPIP | 44791070 | 2.5783  | 6.5544  | -1.753  |
| YRI | NPIP | 44796070 | 3.8688  | 9.4115  | -1.7542 |
| YRI | NPIP | 44801070 | 7.2895  | 11.2602 | -1.063  |
| YRI | NPIP | 44806070 | 8.8319  | 10.0837 | -0.3716 |
| YRI | NPIP | 44811070 | 6.5455  | 8.4031  | -0.6529 |
| YRI | NPIP | 44816070 | 4.169   | 5.5461  | -0.7052 |
| YRI | NPIP | 44821070 | 5.0036  | 6.3864  | -0.6241 |
| YRI | NPIP | 44826070 | 5.8959  | 9.2434  | -1.0773 |
| YRI | NPIP | 44831070 | 6.3589  | 9.7476  | -1.0381 |
| YRI | NPIP | 44836070 | 6.4589  | 10.0837 | -1.0759 |
| YRI | NPIP | 44841070 | 5.6045  | 10.0837 | -1.3295 |
| YRI | NPIP | 44846070 | 5.4928  | 10.0837 | -1.3626 |
| CEU | NPIP | 11432263 | 19.966  | 12.6216 | 1.7769  |
| CEU | NPIP | 11437263 | 21.3389 | 13.3039 | 1.8495  |
| CEU | NPIP | 11442263 | 22.8246 | 14.1567 | 1.881   |
| CEU | NPIP | 11447263 | 16.7616 | 12.6216 | 1.0016  |
| CEU | NPIP | 11452263 | 10.9785 | 11.7688 | -0.2042 |
| CEU | NPIP | 11457263 | 13.7308 | 13.4744 | 0.0583  |
| CEU | NPIP | 11462263 | 19.2801 | 15.6917 | 0.706   |
| CEU | NPIP | 11467263 | 24.0891 | 17.0562 | 1.2776  |
| CEU | NPIP | 11472263 | 32.1884 | 19.9558 | 1.9111  |
| CEU | NPIP | 11477263 | 31.5692 | 19.9558 | 1.8144  |
| CEU | NPIP | 11482263 | 32.4613 | 23.7082 | 1.1578  |
| CEU | NPIP | 11487263 | 29.4218 | 24.9021 | 0.57    |
| CEU | NPIP | 11492263 | 14.2773 | 14.4978 | -0.0468 |
| CEU | NPIP | 11497263 | 15.4529 | 12.9627 | 0.5875  |
| CEU | NPIP | 11502263 | 25.8103 | 18.9324 | 1.1304  |
| CEU | NPIP | 11507263 | 29.4096 | 21.6614 | 1.1184  |
| CEU | NPIP | 11512263 | 27.4205 | 20.2969 | 1.0949  |
| CEU | NPIP | 11517263 | 21.686  | 16.5446 | 0.9617  |
| CEU | NPIP | 11522263 | 17.7246 | 15.0095 | 0.5573  |
| CEU | NPIP | 11527263 | 13.6716 | 11.2571 | 0.6506  |
| CEU | NPIP | 11532263 | 15.0266 | 10.0632 | 1.4854  |
| CEU | NPIP | 11537263 | 16.9206 | 11.9394 | 1.27    |
| CEU | NPIP | 11542263 | 14.0515 | 13.3039 | 0.1721  |
| CEU | NPIP | 11547263 | 18.967  | 16.5446 | 0.4531  |
| CEU | NPIP | 11552263 | 20.0806 | 16.0329 | 0.7802  |
| CEU | NPIP | 11557263 | 20.7619 | 16.8857 | 0.711   |
| CEU | NPIP | 11562263 | 22.985  | 18.5913 | 0.7349  |
| CEU | NPIP | 11567263 | 23.2358 | 16.374  | 1.2962  |
| CEU | NPIP | 11572263 | 20.7273 | 14.6684 | 1.2712  |

## 2\_TajimasD\_data

|     |      |          |         |         |         |
|-----|------|----------|---------|---------|---------|
| CEU | NPIP | 11577263 | 18.9732 | 16.2034 | 0.5285  |
| CEU | NPIP | 11582263 | 22.2989 | 17.9091 | 0.761   |
| CEU | NPIP | 11587263 | 19.0074 | 17.2268 | 0.3204  |
| CEU | NPIP | 11592263 | 24.9128 | 18.9324 | 0.9829  |
| CEU | NPIP | 11597263 | 22.0348 | 14.6684 | 1.5455  |
| CEU | NPIP | 11602263 | 19.7084 | 12.4511 | 1.7785  |
| CEU | NPIP | 11607263 | 26.1438 | 15.0095 | 2.2855  |
| CEU | NPIP | 11612263 | 14.0639 | 9.7221  | 1.3418  |
| CEU | NPIP | 11617263 | 11.2979 | 8.8692  | 0.8173  |
| CEU | NPIP | 11622263 | 13.6009 | 11.4277 | 0.5774  |
| CEU | NPIP | 11627263 | 12.2698 | 12.4511 | -0.0444 |
| CEU | NPIP | 11632263 | 21.3239 | 14.6684 | 1.3964  |
| CEU | NPIP | 11637263 | 20.6984 | 13.8156 | 1.5286  |
| CEU | NPIP | 11642263 | 13.4255 | 12.2805 | 0.2843  |
| CEU | NPIP | 11647263 | 14.1427 | 11.7688 | 0.6135  |
| CEU | NPIP | 11652263 | 12.5584 | 9.3809  | 1.0151  |
| CEU | NPIP | 11657263 | 14.0499 | 9.7221  | 1.3374  |
| CEU | NPIP | 11662263 | 14.7786 | 10.916  | 1.0713  |
| CEU | NPIP | 11667263 | 17.2378 | 12.2805 | 1.2308  |
| CEU | NPIP | 11672263 | 21.2873 | 14.4978 | 1.4404  |
| CEU | NPIP | 11677263 | 19.0886 | 13.1333 | 1.3877  |
| CEU | NPIP | 11682263 | 23.9619 | 14.8389 | 1.8931  |
| CEU | NPIP | 11687263 | 29.6823 | 17.7385 | 2.0897  |
| CEU | NPIP | 11692263 | 21.7143 | 14.6684 | 1.4783  |
| CEU | NPIP | 11697263 | 15.0443 | 11.5982 | 0.9029  |
| CEU | NPIP | 11702263 | 17.3715 | 11.7688 | 1.4479  |
| CEU | NPIP | 11707263 | 15.6731 | 11.0866 | 1.2537  |
| CEU | NPIP | 11712263 | 9.5446  | 9.2104  | 0.1086  |
| CEU | NPIP | 11717263 | 7.0864  | 8.6987  | -0.5524 |
| CEU | NPIP | 11722263 | 7.9534  | 8.0164  | -0.0233 |
| CEU | NPIP | 11727263 | 12.7807 | 10.2337 | 0.7504  |
| CEU | NPIP | 11732263 | 21.1324 | 14.4978 | 1.4075  |
| CEU | NPIP | 11737263 | 24.6137 | 15.0095 | 1.9714  |
| CEU | NPIP | 11742263 | 19.9154 | 12.6216 | 1.7646  |
| CEU | NPIP | 11747263 | 15.0346 | 10.4043 | 1.3432  |
| CEU | NPIP | 11752263 | 14.8722 | 10.7454 | 1.1616  |
| CEU | NPIP | 11757263 | 11.5092 | 10.0632 | 0.4327  |
| CEU | NPIP | 11762263 | 11.0295 | 9.0398  | 0.6578  |
| CEU | NPIP | 11767263 | 13.1752 | 11.0866 | 0.5709  |
| CEU | NPIP | 11772263 | 9.2047  | 9.0398  | 0.0545  |
| CEU | NPIP | 11777263 | 7.8858  | 7.8459  | 0.015   |
| CEU | NPIP | 11782263 | 7.322   | 9.0398  | -0.5679 |
| CEU | NPIP | 11787263 | 6.3671  | 8.5281  | -0.754  |
| CEU | NPIP | 11792263 | 7.7798  | 9.5515  | -0.5566 |
| CEU | NPIP | 11797263 | 7.4451  | 9.3809  | -0.6184 |
| CEU | NPIP | 11802263 | 10.1348 | 9.7221  | 0.1275  |
| CEU | NPIP | 11807263 | 11.9301 | 9.2104  | 0.8838  |
| CEU | NPIP | 11812263 | 11.6083 | 8.5281  | 1.0747  |
| CEU | NPIP | 11817263 | 12.4682 | 9.3809  | 0.9863  |

## 2\_TajimasD\_data

|     |      |          |         |         |         |
|-----|------|----------|---------|---------|---------|
| CEU | NPIP | 11822263 | 10.0585 | 8.187   | 0.678   |
| CEU | NPIP | 11827263 | 8.3523  | 6.8225  | 0.6546  |
| CEU | NPIP | 11832263 | 10.7994 | 7.6753  | 1.2008  |
| CEU | NPIP | 11837263 | 10.9957 | 8.5281  | 0.861   |
| CEU | NPIP | 11842263 | 8.8916  | 8.5281  | 0.1268  |
| CEU | NPIP | 11847263 | 9.2152  | 9.2104  | 0.0016  |
| CEU | NPIP | 11852263 | 9.4733  | 8.8692  | 0.2033  |
| CEU | NPIP | 11857263 | 6.5871  | 6.1402  | 0.2103  |
| CEU | NPIP | 11862263 | 5.8662  | 6.1402  | -0.1289 |
| CEU | NPIP | 11867263 | 7.3752  | 10.4043 | -0.8787 |
| CEU | NPIP | 11872263 | 6.9132  | 11.2571 | -1.1705 |
| CEU | NPIP | 11877263 | 7.6364  | 10.5749 | -0.8396 |
| CEU | NPIP | 11882263 | 9.9536  | 9.8926  | 0.0185  |
| CEU | NPIP | 11887263 | 9.329   | 8.187   | 0.4137  |
| CEU | NPIP | 11892263 | 11.1373 | 9.5515  | 0.4982  |
| CEU | NPIP | 11897263 | 17.7686 | 11.7688 | 1.5505  |
| CEU | NPIP | 11902263 | 18.8001 | 15.3506 | 0.693   |
| CEU | NPIP | 11907263 | 17.9913 | 16.2034 | 0.3411  |
| CEU | NPIP | 11912263 | 14.7458 | 13.645  | 0.2474  |
| CEU | NPIP | 11917263 | 13.8598 | 13.8156 | 0.0098  |
| CEU | NPIP | 11922263 | 13.8586 | 12.9627 | 0.2114  |
| CEU | NPIP | 11927263 | 9.4919  | 10.0632 | -0.171  |
| CEU | NPIP | 11932263 | 10.2962 | 8.6987  | 0.5473  |
| CEU | NPIP | 11937263 | 8.6918  | 7.1636  | 0.6256  |
| CEU | NPIP | 11942263 | 6.5988  | 9.0398  | -0.8071 |
| CEU | NPIP | 11947263 | 8.4708  | 13.8156 | -1.187  |
| CEU | NPIP | 11952263 | 9.8219  | 12.6216 | -0.6773 |
| CEU | NPIP | 11957263 | 9.0858  | 10.0632 | -0.2925 |
| CEU | NPIP | 11962263 | 6.0967  | 8.3576  | -0.8037 |
| CEU | NPIP | 11967263 | 5.7716  | 7.5047  | -0.68   |
| CEU | NPIP | 11972263 | 9.3519  | 9.7221  | -0.1144 |
| CEU | NPIP | 11977263 | 9.6098  | 9.0398  | 0.1885  |
| CEU | NPIP | 11982263 | 8.4735  | 8.3576  | 0.0412  |
| CEU | NPIP | 11987263 | 7.8092  | 8.8692  | -0.3567 |
| CEU | NPIP | 11992263 | 8.3571  | 9.2104  | -0.2773 |
| CEU | NPIP | 11997263 | 6.8571  | 9.3809  | -0.8063 |
| CEU | NPIP | 12002263 | 7.8658  | 10.0632 | -0.6576 |
| CEU | NPIP | 12007263 | 10.7947 | 11.2571 | -0.1246 |
| CEU | NPIP | 12012263 | 6.6223  | 9.8926  | -0.9944 |
| CEU | NPIP | 12017263 | 8.1412  | 10.916  | -0.7696 |
| CEU | NPIP | 12022263 | 7.4372  | 9.0398  | -0.5299 |
| CEU | NPIP | 12027263 | 4.1956  | 6.3108  | -0.9711 |
| CEU | NPIP | 12032263 | 6.2845  | 8.0164  | -0.6397 |
| CEU | NPIP | 12037263 | 8.8481  | 9.7221  | -0.2701 |
| CEU | NPIP | 12042263 | 10.9246 | 12.7922 | -0.4461 |
| CEU | NPIP | 12047263 | 8.1311  | 11.4277 | -0.8758 |
| CEU | NPIP | 12052263 | 5.3822  | 9.3809  | -1.2774 |
| CEU | NPIP | 12057263 | 7.793   | 11.0866 | -0.9003 |
| CEU | NPIP | 12062263 | 9.0295  | 11.0866 | -0.5623 |



## 2\_TajimasD\_data

|     |      |          |         |         |         |
|-----|------|----------|---------|---------|---------|
| CEU | NPIP | 12067263 | 12.4958 | 11.2571 | 0.3338  |
| CEU | NPIP | 12072263 | 16.9786 | 13.8156 | 0.7025  |
| CEU | NPIP | 12077263 | 16.1198 | 13.645  | 0.5562  |
| CEU | NPIP | 12082263 | 11.1808 | 11.4277 | -0.0656 |
| CEU | NPIP | 12087263 | 5.6386  | 10.0632 | -1.3241 |
| CEU | NPIP | 12092263 | 6.737   | 8.3576  | -0.5761 |
| CEU | NPIP | 12097263 | 9.3484  | 9.2104  | 0.0448  |
| CEU | NPIP | 12102263 | 10.9728 | 9.5515  | 0.4465  |
| CEU | NPIP | 12107263 | 9.0847  | 8.5281  | 0.1942  |
| CEU | NPIP | 12112263 | 5.9013  | 7.1636  | -0.5167 |
| CEU | NPIP | 12117263 | 7.4519  | 5.7991  | 0.8186  |
| CEU | NPIP | 12122263 | 8.4572  | 6.1402  | 1.0903  |
| CEU | NPIP | 12127263 | 11.578  | 8.187   | 1.2285  |
| CEU | NPIP | 12132263 | 14.7368 | 10.0632 | 1.3986  |
| CEU | NPIP | 12137263 | 21.6277 | 13.645  | 1.7939  |
| CEU | NPIP | 12142263 | 20.7015 | 13.4744 | 1.6436  |
| CEU | NPIP | 12147263 | 19.0676 | 12.2805 | 1.6851  |
| CEU | NPIP | 12152263 | 19.9727 | 13.645  | 1.422   |
| CEU | NPIP | 12157263 | 14.3767 | 11.4277 | 0.7835  |
| CEU | NPIP | 12162263 | 14.7982 | 11.5982 | 0.8384  |
| CEU | NPIP | 12167263 | 16.2977 | 14.8389 | 0.3027  |
| CEU | NPIP | 12172263 | 15.6467 | 15.6917 | -0.0089 |
| CEU | NPIP | 12177263 | 18.0251 | 15.0095 | 0.619   |
| CEU | NPIP | 12182263 | 17.4335 | 12.9627 | 1.0547  |
| CEU | NPIP | 12187263 | 10.7912 | 8.5281  | 0.7896  |
| CEU | NPIP | 12192263 | 7.2099  | 7.5047  | -0.1157 |
| CEU | NPIP | 12197263 | 6.858   | 8.3576  | -0.5331 |
| CEU | NPIP | 12202263 | 14.0835 | 10.916  | 0.8785  |
| CEU | NPIP | 12207263 | 18.2362 | 13.1333 | 1.189   |
| CEU | NPIP | 12212263 | 14.8167 | 12.1099 | 0.681   |
| CEU | NPIP | 12217263 | 13.1299 | 11.9394 | 0.3035  |
| CEU | NPIP | 12222263 | 10.9905 | 10.7454 | 0.069   |
| CEU | NPIP | 12227263 | 10.5863 | 10.4043 | 0.0528  |
| CEU | NPIP | 12232263 | 13.14   | 12.7922 | 0.0831  |
| CEU | NPIP | 12237263 | 14.0095 | 13.3039 | 0.1624  |
| CEU | NPIP | 12242263 | 13.3793 | 12.2805 | 0.2728  |
| CEU | NPIP | 12247263 | 15.7777 | 13.4744 | 0.5238  |
| CEU | NPIP | 12252263 | 15.816  | 12.7922 | 0.7223  |
| CEU | NPIP | 12257263 | 11.2393 | 9.7221  | 0.4689  |
| CEU | NPIP | 12262263 | 6.2746  | 7.6753  | -0.5384 |
| CEU | NPIP | 12267263 | 3.8223  | 6.1402  | -1.0907 |
| CEU | NPIP | 12272263 | 4.4793  | 5.7991  | -0.6537 |
| CEU | NPIP | 12277263 | 5.7666  | 6.6519  | -0.3876 |
| CEU | NPIP | 12282263 | 7.1163  | 7.8459  | -0.2749 |
| CEU | NPIP | 12287263 | 6.811   | 9.2104  | -0.7797 |
| CEU | NPIP | 12292263 | 7.0398  | 10.2337 | -0.9409 |
| CEU | NPIP | 12297263 | 7.1233  | 10.5749 | -0.9862 |
| CEU | NPIP | 12302263 | 10.1268 | 12.4511 | -0.5696 |
| CEU | NPIP | 12307263 | 10.8176 | 14.3272 | -0.753  |

## 2\_TajimasD\_data

|     |      |          |         |         |         |
|-----|------|----------|---------|---------|---------|
| CEU | NPIP | 12312263 | 6.2119  | 12.1099 | -1.4838 |
| CEU | NPIP | 12317263 | 3.5525  | 8.0164  | -1.6488 |
| CEU | NPIP | 12322263 | 6.0095  | 7.6753  | -0.6403 |
| CEU | NPIP | 12327263 | 6.5387  | 8.0164  | -0.5458 |
| CEU | NPIP | 12332263 | 4.4084  | 8.3576  | -1.4038 |
| CEU | NPIP | 12337263 | 3.3195  | 7.1636  | -1.5736 |
| CEU | NPIP | 12342263 | 3.2072  | 5.7991  | -1.2837 |
| CEU | NPIP | 12347263 | 5.704   | 7.5047  | -0.7065 |
| CEU | NPIP | 12352263 | 11.1462 | 12.2805 | -0.2816 |
| CEU | NPIP | 12357263 | 13.3979 | 14.3272 | -0.1994 |
| CEU | NPIP | 12362263 | 12.4822 | 12.9627 | -0.1134 |
| CEU | NPIP | 12367263 | 10.0338 | 12.7922 | -0.6589 |
| CEU | NPIP | 12372263 | 6.9959  | 12.4511 | -1.3369 |
| CEU | NPIP | 12377263 | 6.0375  | 10.4043 | -1.2668 |
| CEU | NPIP | 12382263 | 6.6242  | 9.8926  | -0.9938 |
| CEU | NPIP | 12387263 | 6.4341  | 10.916  | -1.2431 |
| CEU | NPIP | 12392263 | 3.8     | 11.2571 | -2.0094 |
| CEU | NPIP | 12397263 | 4.6766  | 10.5749 | -1.6852 |
| CEU | NPIP | 12402263 | 8.1402  | 10.2337 | -0.6168 |
| CEU | NPIP | 12407263 | 7.5644  | 9.2104  | -0.5349 |
| CEU | NPIP | 12412263 | 6.1538  | 6.8225  | -0.2861 |
| CEU | NPIP | 12417263 | 8.5424  | 9.5515  | -0.317  |
| CEU | NPIP | 12422263 | 8.5242  | 12.2805 | -0.9326 |
| CEU | NPIP | 12427263 | 5.9526  | 11.7688 | -1.5031 |
| CEU | NPIP | 12432263 | 4.3317  | 9.3809  | -1.613  |
| CEU | NPIP | 12437263 | 7.317   | 10.4043 | -0.8956 |
| CEU | NPIP | 12442263 | 8.482   | 11.0866 | -0.712  |
| CEU | NPIP | 12447263 | 9.4554  | 11.4277 | -0.524  |
| CEU | NPIP | 12452263 | 15.4192 | 15.0095 | 0.0841  |
| CEU | NPIP | 12457263 | 13.942  | 13.9861 | -0.0097 |
| CEU | NPIP | 12462263 | 10.8077 | 13.4744 | -0.6065 |
| CEU | NPIP | 12467263 | 11.6438 | 15.5212 | -0.7709 |
| CHB | NPIP | 11432263 | 16.8639 | 12.8755 | 0.9442  |
| CHB | NPIP | 11437263 | 15.4496 | 13.2144 | 0.5163  |
| CHB | NPIP | 11442263 | 12.8039 | 15.0779 | -0.4634 |
| CHB | NPIP | 11447263 | 11.1201 | 13.2144 | -0.4838 |
| CHB | NPIP | 11452263 | 10.4445 | 13.7226 | -0.7306 |
| CHB | NPIP | 11457263 | 17.3805 | 18.6357 | -0.2089 |
| CHB | NPIP | 11462263 | 20.956  | 18.9745 | 0.324   |
| CHB | NPIP | 11467263 | 19.2557 | 17.6192 | 0.2874  |
| CHB | NPIP | 11472263 | 19.8145 | 18.9745 | 0.1374  |
| CHB | NPIP | 11477263 | 19.1568 | 18.8051 | 0.058   |
| CHB | NPIP | 11482263 | 26.8945 | 22.7016 | 0.5767  |
| CHB | NPIP | 11487263 | 26.7639 | 20.6686 | 0.918   |
| CHB | NPIP | 11492263 | 14.1418 | 14.7391 | -0.1244 |
| CHB | NPIP | 11497263 | 15.845  | 18.2968 | -0.4152 |
| CHB | NPIP | 11502263 | 26.3417 | 20.3298 | 0.92    |
| CHB | NPIP | 11507263 | 27.339  | 25.0734 | 0.283   |
| CHB | NPIP | 11512263 | 22.9638 | 24.904  | -0.244  |

## 2\_TajimasD\_data

|     |      |          |         |         |         |
|-----|------|----------|---------|---------|---------|
| CHB | NPIP | 11517263 | 21.92   | 17.6192 | 0.7552  |
| CHB | NPIP | 11522263 | 20.94   | 15.2474 | 1.1478  |
| CHB | NPIP | 11527263 | 16.5127 | 12.5367 | 0.9653  |
| CHB | NPIP | 11532263 | 17.8576 | 13.045  | 1.1253  |
| CHB | NPIP | 11537263 | 21.091  | 15.7556 | 1.0427  |
| CHB | NPIP | 11542263 | 20.8134 | 14.5697 | 1.3146  |
| CHB | NPIP | 11547263 | 22.7283 | 15.4168 | 1.4588  |
| CHB | NPIP | 11552263 | 20.0748 | 16.0944 | 0.7622  |
| CHB | NPIP | 11557263 | 20.3533 | 17.6192 | 0.4801  |
| CHB | NPIP | 11562263 | 24.8167 | 19.991  | 0.7505  |
| CHB | NPIP | 11567263 | 26.0379 | 18.4662 | 1.271   |
| CHB | NPIP | 11572263 | 23.609  | 16.9415 | 1.2156  |
| CHB | NPIP | 11577263 | 28.9924 | 20.4992 | 1.2893  |
| CHB | NPIP | 11582263 | 31.913  | 24.2264 | 0.9928  |
| CHB | NPIP | 11587263 | 22.8997 | 19.6521 | 0.5135  |
| CHB | NPIP | 11592263 | 26.6141 | 19.1439 | 1.2112  |
| CHB | NPIP | 11597263 | 22.0697 | 20.8381 | 0.184   |
| CHB | NPIP | 11602263 | 18.8389 | 18.1274 | 0.1216  |
| CHB | NPIP | 11607263 | 25.4991 | 17.4498 | 1.4266  |
| CHB | NPIP | 11612263 | 14.3274 | 13.2144 | 0.2571  |
| CHB | NPIP | 11617263 | 11.0699 | 10.3343 | 0.2141  |
| CHB | NPIP | 11622263 | 10.5111 | 11.1814 | -0.1812 |
| CHB | NPIP | 11627263 | 8.9551  | 14.5697 | -1.1822 |
| CHB | NPIP | 11632263 | 23.0672 | 19.3133 | 0.6035  |
| CHB | NPIP | 11637263 | 22.696  | 16.4333 | 1.1756  |
| CHB | NPIP | 11642263 | 11.9939 | 14.4003 | -0.5123 |
| CHB | NPIP | 11647263 | 13.2105 | 14.2309 | -0.2197 |
| CHB | NPIP | 11652263 | 9.8791  | 10.8426 | -0.2681 |
| CHB | NPIP | 11657263 | 10.2747 | 11.012  | -0.2022 |
| CHB | NPIP | 11662263 | 13.8456 | 14.2309 | -0.083  |
| CHB | NPIP | 11667263 | 16.2084 | 14.9085 | 0.2678  |
| CHB | NPIP | 11672263 | 15.0121 | 14.5697 | 0.0931  |
| CHB | NPIP | 11677263 | 10.2283 | 13.2144 | -0.6898 |
| CHB | NPIP | 11682263 | 19.2393 | 13.892  | 1.178   |
| CHB | NPIP | 11687263 | 27.9863 | 16.4333 | 2.1687  |
| CHB | NPIP | 11692263 | 20.6354 | 14.0615 | 1.4317  |
| CHB | NPIP | 11697263 | 12.7405 | 12.0285 | 0.1797  |
| CHB | NPIP | 11702263 | 14.9907 | 13.7226 | 0.2826  |
| CHB | NPIP | 11707263 | 13.5618 | 12.5367 | 0.2489  |
| CHB | NPIP | 11712263 | 8.0036  | 9.8261  | -0.556  |
| CHB | NPIP | 11717263 | 6.3088  | 9.6567  | -1.0381 |
| CHB | NPIP | 11722263 | 6.2802  | 10.5037 | -1.2109 |
| CHB | NPIP | 11727263 | 7.8277  | 12.8755 | -1.195  |
| CHB | NPIP | 11732263 | 12.7634 | 15.4168 | -0.5294 |
| CHB | NPIP | 11737263 | 18.2029 | 17.958  | 0.0422  |
| CHB | NPIP | 11742263 | 16.4297 | 16.6027 | -0.0322 |
| CHB | NPIP | 11747263 | 11.962  | 11.8591 | 0.0263  |
| CHB | NPIP | 11752263 | 14.1444 | 14.4003 | -0.0545 |
| CHB | NPIP | 11757263 | 14.708  | 17.2803 | -0.4602 |

## 2\_TajimasD\_data

|     |      |          |         |         |         |
|-----|------|----------|---------|---------|---------|
| CHB | NPIP | 11762263 | 13.0897 | 11.6896 | 0.3631  |
| CHB | NPIP | 11767263 | 15.0563 | 11.8591 | 0.818   |
| CHB | NPIP | 11772263 | 11.4689 | 10.8426 | 0.1743  |
| CHB | NPIP | 11777263 | 8.0518  | 7.1154  | 0.3846  |
| CHB | NPIP | 11782263 | 8.8924  | 8.6402  | 0.0867  |
| CHB | NPIP | 11787263 | 10.0874 | 10.3343 | -0.0719 |
| CHB | NPIP | 11792263 | 9.8382  | 11.5202 | -0.4422 |
| CHB | NPIP | 11797263 | 7.5254  | 9.6567  | -0.6609 |
| CHB | NPIP | 11802263 | 9.8667  | 10.1649 | -0.0882 |
| CHB | NPIP | 11807263 | 10.7074 | 10.6731 | 0.0097  |
| CHB | NPIP | 11812263 | 10.4872 | 9.3178  | 0.3748  |
| CHB | NPIP | 11817263 | 11.3746 | 8.979   | 0.7947  |
| CHB | NPIP | 11822263 | 9.0206  | 8.1319  | 0.323   |
| CHB | NPIP | 11827263 | 7.6265  | 7.1154  | 0.2099  |
| CHB | NPIP | 11832263 | 10.249  | 9.1484  | 0.3588  |
| CHB | NPIP | 11837263 | 11.0373 | 11.1814 | -0.039  |
| CHB | NPIP | 11842263 | 9.6349  | 9.9955  | -0.1083 |
| CHB | NPIP | 11847263 | 9.0215  | 10.5037 | -0.4249 |
| CHB | NPIP | 11852263 | 7.7523  | 9.3178  | -0.5018 |
| CHB | NPIP | 11857263 | 4.9448  | 7.2848  | -0.9406 |
| CHB | NPIP | 11862263 | 5.1383  | 8.3013  | -1.1281 |
| CHB | NPIP | 11867263 | 7.0622  | 8.979   | -0.6359 |
| CHB | NPIP | 11872263 | 7.7908  | 11.1814 | -0.9168 |
| CHB | NPIP | 11877263 | 8.3651  | 12.5367 | -1.0128 |
| CHB | NPIP | 11882263 | 9.6964  | 11.1814 | -0.4015 |
| CHB | NPIP | 11887263 | 10.7211 | 10.5037 | 0.0623  |
| CHB | NPIP | 11892263 | 13.4674 | 12.0285 | 0.3632  |
| CHB | NPIP | 11897263 | 21.5025 | 15.5862 | 1.1682  |
| CHB | NPIP | 11902263 | 24.2075 | 18.4662 | 0.9637  |
| CHB | NPIP | 11907263 | 21.0492 | 17.1109 | 0.7112  |
| CHB | NPIP | 11912263 | 16.2089 | 14.0615 | 0.4677  |
| CHB | NPIP | 11917263 | 13.6407 | 13.7226 | -0.0183 |
| CHB | NPIP | 11922263 | 12.4509 | 13.2144 | -0.1764 |
| CHB | NPIP | 11927263 | 9.5219  | 12.5367 | -0.7319 |
| CHB | NPIP | 11932263 | 9.4348  | 12.0285 | -0.6548 |
| CHB | NPIP | 11937263 | 8.2281  | 8.979   | -0.2491 |
| CHB | NPIP | 11942263 | 6.6825  | 9.8261  | -0.9591 |
| CHB | NPIP | 11947263 | 6.4099  | 13.5532 | -1.611  |
| CHB | NPIP | 11952263 | 6.1742  | 11.8591 | -1.4544 |
| CHB | NPIP | 11957263 | 5.7599  | 10.1649 | -1.3022 |
| CHB | NPIP | 11962263 | 3.8721  | 8.6402  | -1.639  |
| CHB | NPIP | 11967263 | 3.3501  | 8.1319  | -1.7381 |
| CHB | NPIP | 11972263 | 6.0781  | 11.012  | -1.3533 |
| CHB | NPIP | 11977263 | 7.0282  | 10.6731 | -1.0295 |
| CHB | NPIP | 11982263 | 6.0188  | 9.9955  | -1.1941 |
| CHB | NPIP | 11987263 | 6.2875  | 10.6731 | -1.2387 |
| CHB | NPIP | 11992263 | 7.7617  | 10.6731 | -0.8223 |
| CHB | NPIP | 11997263 | 6.762   | 9.1484  | -0.7781 |
| CHB | NPIP | 12002263 | 7.6726  | 10.5037 | -0.8117 |

## 2\_TajimasD\_data

|     |      |          |         |         |         |
|-----|------|----------|---------|---------|---------|
| CHB | NPIP | 12007263 | 8.9968  | 12.5367 | -0.8594 |
| CHB | NPIP | 12012263 | 5.3055  | 10.3343 | -1.4638 |
| CHB | NPIP | 12017263 | 6.5759  | 10.1649 | -1.061  |
| CHB | NPIP | 12022263 | 6.3227  | 7.9625  | -0.6077 |
| CHB | NPIP | 12027263 | 5.0297  | 7.4543  | -0.9544 |
| CHB | NPIP | 12032263 | 7.1007  | 8.979   | -0.6231 |
| CHB | NPIP | 12037263 | 6.9842  | 9.4872  | -0.789  |
| CHB | NPIP | 12042263 | 10.7769 | 12.3673 | -0.3911 |
| CHB | NPIP | 12047263 | 10.4013 | 11.5202 | -0.2942 |
| CHB | NPIP | 12052263 | 6.8884  | 10.8426 | -1.1005 |
| CHB | NPIP | 12057263 | 9.7709  | 11.1814 | -0.3814 |
| CHB | NPIP | 12062263 | 11.9877 | 12.8755 | -0.2102 |
| CHB | NPIP | 12067263 | 14.403  | 16.0944 | -0.3239 |
| CHB | NPIP | 12072263 | 16.9212 | 14.9085 | 0.4146  |
| CHB | NPIP | 12077263 | 16.6876 | 14.0615 | 0.5719  |
| CHB | NPIP | 12082263 | 11.2688 | 13.045  | -0.4153 |
| CHB | NPIP | 12087263 | 5.4529  | 10.1649 | -1.3929 |
| CHB | NPIP | 12092263 | 4.6052  | 9.8261  | -1.5929 |
| CHB | NPIP | 12097263 | 4.0202  | 10.5037 | -1.8588 |
| CHB | NPIP | 12102263 | 3.5182  | 9.8261  | -1.9245 |
| CHB | NPIP | 12107263 | 3.1038  | 8.1319  | -1.8276 |
| CHB | NPIP | 12112263 | 2.2368  | 7.2848  | -2.0291 |
| CHB | NPIP | 12117263 | 3.4691  | 8.3013  | -1.7234 |
| CHB | NPIP | 12122263 | 5.8631  | 7.7931  | -0.7294 |
| CHB | NPIP | 12127263 | 7.929   | 10.1649 | -0.661  |
| CHB | NPIP | 12132263 | 10.0944 | 13.045  | -0.6899 |
| CHB | NPIP | 12137263 | 9.9433  | 14.2309 | -0.9232 |
| CHB | NPIP | 12142263 | 7.9859  | 12.5367 | -1.1049 |
| CHB | NPIP | 12147263 | 10.4997 | 11.5202 | -0.2683 |
| CHB | NPIP | 12152263 | 14.1761 | 13.5532 | 0.1405  |
| CHB | NPIP | 12157263 | 14.8915 | 14.4003 | 0.1046  |
| CHB | NPIP | 12162263 | 16.384  | 14.4003 | 0.4223  |
| CHB | NPIP | 12167263 | 20.5591 | 13.045  | 1.757   |
| CHB | NPIP | 12172263 | 20.8962 | 13.3838 | 1.7145  |
| CHB | NPIP | 12177263 | 20.2482 | 14.9085 | 1.1     |
| CHB | NPIP | 12182263 | 17.7455 | 13.5532 | 0.9454  |
| CHB | NPIP | 12187263 | 9.8572  | 9.9955  | -0.0415 |
| CHB | NPIP | 12192263 | 6.1993  | 8.4708  | -0.7952 |
| CHB | NPIP | 12197263 | 6.3269  | 7.9625  | -0.6061 |
| CHB | NPIP | 12202263 | 12.6368 | 13.892  | -0.2765 |
| CHB | NPIP | 12207263 | 16.2732 | 16.6027 | -0.0612 |
| CHB | NPIP | 12212263 | 13.6474 | 13.045  | 0.1409  |
| CHB | NPIP | 12217263 | 13.613  | 11.6896 | 0.4988  |
| CHB | NPIP | 12222263 | 11.9111 | 10.8426 | 0.2974  |
| CHB | NPIP | 12227263 | 10.5226 | 12.5367 | -0.489  |
| CHB | NPIP | 12232263 | 10.7936 | 13.3838 | -0.5911 |
| CHB | NPIP | 12237263 | 13.418  | 14.0615 | -0.1401 |
| CHB | NPIP | 12242263 | 14.4312 | 13.5532 | 0.198   |
| CHB | NPIP | 12247263 | 17.7512 | 14.4003 | 0.7134  |

## 2\_TajimasD\_data

|     |      |          |         |         |         |
|-----|------|----------|---------|---------|---------|
| CHB | NPIP | 12252263 | 18.9694 | 14.0615 | 1.0688  |
| CHB | NPIP | 12257263 | 13.2939 | 13.2144 | 0.0184  |
| CHB | NPIP | 12262263 | 7.9084  | 12.3673 | -1.0965 |
| CHB | NPIP | 12267263 | 5.4097  | 9.4872  | -1.2853 |
| CHB | NPIP | 12272263 | 5.8511  | 11.012  | -1.4156 |
| CHB | NPIP | 12277263 | 6.6775  | 9.9955  | -0.9963 |
| CHB | NPIP | 12282263 | 7.7948  | 8.1319  | -0.1225 |
| CHB | NPIP | 12287263 | 7.0464  | 9.3178  | -0.7281 |
| CHB | NPIP | 12292263 | 7.9528  | 11.6896 | -0.9691 |
| CHB | NPIP | 12297263 | 8.5901  | 12.5367 | -0.9582 |
| CHB | NPIP | 12302263 | 12.6686 | 13.5532 | -0.1995 |
| CHB | NPIP | 12307263 | 13.0118 | 16.7721 | -0.6922 |
| CHB | NPIP | 12312263 | 7.1104  | 16.6027 | -1.7645 |
| CHB | NPIP | 12317263 | 4.6438  | 14.2309 | -2.0642 |
| CHB | NPIP | 12322263 | 7.1333  | 16.4333 | -1.7458 |
| CHB | NPIP | 12327263 | 7.3588  | 15.2474 | -1.5906 |
| CHB | NPIP | 12332263 | 5.1812  | 12.5367 | -1.7858 |
| CHB | NPIP | 12337263 | 5.4483  | 14.5697 | -1.9205 |
| CHB | NPIP | 12342263 | 4.5972  | 11.8591 | -1.8579 |
| CHB | NPIP | 12347263 | 5.4637  | 9.1484  | -1.2014 |
| CHB | NPIP | 12352263 | 10.7946 | 14.4003 | -0.7677 |
| CHB | NPIP | 12357263 | 13.635  | 17.2803 | -0.6521 |
| CHB | NPIP | 12362263 | 13.6453 | 17.4498 | -0.6743 |
| CHB | NPIP | 12367263 | 10.7706 | 15.2474 | -0.9027 |
| CHB | NPIP | 12372263 | 7.5298  | 12.0285 | -1.1357 |
| CHB | NPIP | 12377263 | 7.4213  | 12.1979 | -1.1901 |
| CHB | NPIP | 12382263 | 8.7641  | 13.2144 | -1.028  |
| CHB | NPIP | 12387263 | 7.1199  | 12.7061 | -1.3392 |
| CHB | NPIP | 12392263 | 4.4371  | 11.8591 | -1.8989 |
| CHB | NPIP | 12397263 | 7.2823  | 12.8755 | -1.3241 |
| CHB | NPIP | 12402263 | 9.3457  | 13.2144 | -0.8937 |
| CHB | NPIP | 12407263 | 7.5924  | 12.0285 | -1.1199 |
| CHB | NPIP | 12412263 | 7.2894  | 8.6402  | -0.4643 |
| CHB | NPIP | 12417263 | 9.1748  | 8.8096  | 0.1233  |
| CHB | NPIP | 12422263 | 9.1687  | 12.3673 | -0.7866 |
| CHB | NPIP | 12427263 | 7.5214  | 13.5532 | -1.3603 |
| CHB | NPIP | 12432263 | 5.5934  | 11.5202 | -1.5582 |
| CHB | NPIP | 12437263 | 9.3389  | 13.892  | -1.003  |
| CHB | NPIP | 12442263 | 10.4952 | 14.9085 | -0.9091 |
| CHB | NPIP | 12447263 | 10.85   | 13.2144 | -0.5462 |
| CHB | NPIP | 12452263 | 17.084  | 16.4333 | 0.1221  |
| CHB | NPIP | 12457263 | 16.5511 | 17.7886 | -0.2153 |
| CHB | NPIP | 12462263 | 14.0651 | 17.1109 | -0.5501 |
| CHB | NPIP | 12467263 | 14.9033 | 16.6027 | -0.3159 |
| YRI | NPIP | 11432263 | 19.7182 | 18.1507 | 0.2666  |
| YRI | NPIP | 11437263 | 21.3468 | 16.9743 | 0.793   |
| YRI | NPIP | 11442263 | 24.1009 | 19.8313 | 0.6669  |
| YRI | NPIP | 11447263 | 20.4789 | 19.8313 | 0.1012  |
| YRI | NPIP | 11452263 | 18.8935 | 22.5203 | -0.5011 |

## 2\_TajimasD\_data

|     |      |          |         |         |         |
|-----|------|----------|---------|---------|---------|
| YRI | NPIP | 11457263 | 26.3563 | 26.7219 | -0.0428 |
| YRI | NPIP | 11462263 | 28.1552 | 28.0664 | 0.0099  |
| YRI | NPIP | 11467263 | 25.3097 | 26.7219 | -0.1653 |
| YRI | NPIP | 11472263 | 34.2478 | 31.2596 | 0.3002  |
| YRI | NPIP | 11477263 | 34.4312 | 33.6124 | 0.0766  |
| YRI | NPIP | 11482263 | 37.6994 | 33.6124 | 0.3825  |
| YRI | NPIP | 11487263 | 37.3767 | 33.2763 | 0.3875  |
| YRI | NPIP | 11492263 | 23.3556 | 29.747  | -0.6739 |
| YRI | NPIP | 11497263 | 21.4561 | 30.5873 | -0.937  |
| YRI | NPIP | 11502263 | 28.4145 | 30.5873 | -0.223  |
| YRI | NPIP | 11507263 | 41.967  | 36.4695 | 0.475   |
| YRI | NPIP | 11512263 | 41.3307 | 38.3182 | 0.248   |
| YRI | NPIP | 11517263 | 26.1158 | 28.7386 | -0.286  |
| YRI | NPIP | 11522263 | 22.1402 | 24.201  | -0.2655 |
| YRI | NPIP | 11527263 | 19.8287 | 19.9994 | -0.0264 |
| YRI | NPIP | 11532263 | 19.487  | 19.3272 | 0.0256  |
| YRI | NPIP | 11537263 | 20.0899 | 21.0078 | -0.1356 |
| YRI | NPIP | 11542263 | 17.9811 | 22.0162 | -0.5698 |
| YRI | NPIP | 11547263 | 25.1277 | 27.058  | -0.2232 |
| YRI | NPIP | 11552263 | 25.3475 | 27.2261 | -0.2159 |
| YRI | NPIP | 11557263 | 25.5295 | 26.7219 | -0.1396 |
| YRI | NPIP | 11562263 | 32.0816 | 28.7386 | 0.3645  |
| YRI | NPIP | 11567263 | 31.3232 | 28.9067 | 0.262   |
| YRI | NPIP | 11572263 | 26.6344 | 27.8983 | -0.1419 |
| YRI | NPIP | 11577263 | 28.2734 | 29.5789 | -0.1384 |
| YRI | NPIP | 11582263 | 30.4646 | 32.2679 | -0.1756 |
| YRI | NPIP | 11587263 | 24.5716 | 29.2428 | -0.5008 |
| YRI | NPIP | 11592263 | 30.3903 | 30.9234 | -0.0541 |
| YRI | NPIP | 11597263 | 37.5972 | 32.436  | 0.5001  |
| YRI | NPIP | 11602263 | 36.5244 | 26.89   | 1.1207  |
| YRI | NPIP | 11607263 | 33.9288 | 26.7219 | 0.8435  |
| YRI | NPIP | 11612263 | 21.1925 | 26.3858 | -0.6153 |
| YRI | NPIP | 11617263 | 18.0913 | 25.3774 | -0.8966 |
| YRI | NPIP | 11622263 | 18.5202 | 22.3523 | -0.5333 |
| YRI | NPIP | 11627263 | 20.4278 | 25.0413 | -0.5751 |
| YRI | NPIP | 11632263 | 33.7293 | 31.9318 | 0.1769  |
| YRI | NPIP | 11637263 | 27.7748 | 26.5538 | 0.1438  |
| YRI | NPIP | 11642263 | 19.2767 | 22.0162 | -0.3869 |
| YRI | NPIP | 11647263 | 19.9464 | 20.6717 | -0.1089 |
| YRI | NPIP | 11652263 | 14.9992 | 20.1675 | -0.7943 |
| YRI | NPIP | 11657263 | 15.1329 | 21.512  | -0.9212 |
| YRI | NPIP | 11662263 | 14.8632 | 19.8313 | -0.776  |
| YRI | NPIP | 11667263 | 13.9959 | 21.512  | -1.0854 |
| YRI | NPIP | 11672263 | 16.5919 | 24.201  | -0.9805 |
| YRI | NPIP | 11677263 | 14.6628 | 19.8313 | -0.8073 |
| YRI | NPIP | 11682263 | 20.9131 | 18.3188 | 0.4374  |
| YRI | NPIP | 11687263 | 27.5848 | 20.6717 | 1.0375  |
| YRI | NPIP | 11692263 | 20.4829 | 18.3188 | 0.3648  |
| YRI | NPIP | 11697263 | 14.4042 | 17.9827 | -0.6141 |

## 2\_TajimasD\_data

|     |      |          |         |         |         |
|-----|------|----------|---------|---------|---------|
| YRI | NPIP | 11702263 | 14.9443 | 20.5036 | -0.8409 |
| YRI | NPIP | 11707263 | 13.8604 | 18.823  | -0.8151 |
| YRI | NPIP | 11712263 | 11.3341 | 16.9743 | -1.023  |
| YRI | NPIP | 11717263 | 11.5129 | 17.1423 | -1.0114 |
| YRI | NPIP | 11722263 | 11.2888 | 16.6382 | -0.989  |
| YRI | NPIP | 11727263 | 18.6619 | 17.6465 | 0.1774  |
| YRI | NPIP | 11732263 | 27.8401 | 20.8397 | 1.0424  |
| YRI | NPIP | 11737263 | 29.3758 | 24.5371 | 0.6152  |
| YRI | NPIP | 11742263 | 24.7371 | 22.8565 | 0.2561  |
| YRI | NPIP | 11747263 | 19.0106 | 18.991  | 0.0032  |
| YRI | NPIP | 11752263 | 21.2953 | 22.3523 | -0.1471 |
| YRI | NPIP | 11757263 | 22.6365 | 25.2093 | -0.3187 |
| YRI | NPIP | 11762263 | 16.9906 | 20.3355 | -0.51   |
| YRI | NPIP | 11767263 | 15.639  | 19.1591 | -0.5684 |
| YRI | NPIP | 11772263 | 14.1126 | 17.1423 | -0.5443 |
| YRI | NPIP | 11777263 | 10.7502 | 14.4534 | -0.783  |
| YRI | NPIP | 11782263 | 11.492  | 15.7978 | -0.8365 |
| YRI | NPIP | 11787263 | 13.8381 | 16.134  | -0.4371 |
| YRI | NPIP | 11792263 | 13.2859 | 17.8146 | -0.7842 |
| YRI | NPIP | 11797263 | 9.6894  | 18.823  | -1.5002 |
| YRI | NPIP | 11802263 | 11.36   | 16.8062 | -0.9972 |
| YRI | NPIP | 11807263 | 11.8648 | 14.4534 | -0.5473 |
| YRI | NPIP | 11812263 | 12.1173 | 15.9659 | -0.7401 |
| YRI | NPIP | 11817263 | 12.647  | 15.4617 | -0.5581 |
| YRI | NPIP | 11822263 | 9.8586  | 12.2685 | -0.5951 |
| YRI | NPIP | 11827263 | 8.5241  | 13.1089 | -1.0635 |
| YRI | NPIP | 11832263 | 10.8467 | 17.8146 | -1.2066 |
| YRI | NPIP | 11837263 | 13.3994 | 17.3104 | -0.6961 |
| YRI | NPIP | 11842263 | 12.4072 | 13.7811 | -0.3039 |
| YRI | NPIP | 11847263 | 13.1271 | 15.2937 | -0.4341 |
| YRI | NPIP | 11852263 | 11.1571 | 14.7895 | -0.7514 |
| YRI | NPIP | 11857263 | 7.6252  | 13.2769 | -1.2953 |
| YRI | NPIP | 11862263 | 9.9648  | 13.7811 | -0.8443 |
| YRI | NPIP | 11867263 | 10.3438 | 14.2853 | -0.8427 |
| YRI | NPIP | 11872263 | 10.2774 | 16.8062 | -1.1955 |
| YRI | NPIP | 11877263 | 10.7414 | 17.3104 | -1.1693 |
| YRI | NPIP | 11882263 | 10.4855 | 16.9743 | -1.1769 |
| YRI | NPIP | 11887263 | 12.1422 | 18.1507 | -1.022  |
| YRI | NPIP | 11892263 | 16.5617 | 19.3272 | -0.4428 |
| YRI | NPIP | 11897263 | 22.1442 | 22.1842 | -0.0056 |
| YRI | NPIP | 11902263 | 23.5074 | 22.5203 | 0.1364  |
| YRI | NPIP | 11907263 | 21.601  | 19.9994 | 0.2481  |
| YRI | NPIP | 11912263 | 18.1663 | 22.8565 | -0.6388 |
| YRI | NPIP | 11917263 | 17.6534 | 22.8565 | -0.7086 |
| YRI | NPIP | 11922263 | 17.3872 | 18.1507 | -0.1299 |
| YRI | NPIP | 11927263 | 13.8134 | 15.7978 | -0.3855 |
| YRI | NPIP | 11932263 | 11.7188 | 14.6214 | -0.607  |
| YRI | NPIP | 11937263 | 8.0526  | 12.1005 | -1.0127 |
| YRI | NPIP | 11942263 | 8.5466  | 13.2769 | -1.0841 |



## 2\_TajimasD\_data

|     |      |          |         |         |         |
|-----|------|----------|---------|---------|---------|
| YRI | NPIP | 11947263 | 12.142  | 18.1507 | -1.022  |
| YRI | NPIP | 11952263 | 11.3769 | 15.7978 | -0.8588 |
| YRI | NPIP | 11957263 | 10.3295 | 14.1172 | -0.819  |
| YRI | NPIP | 11962263 | 6.7891  | 12.9408 | -1.4445 |
| YRI | NPIP | 11967263 | 5.5729  | 10.756  | -1.4484 |
| YRI | NPIP | 11972263 | 9.9945  | 14.4534 | -0.9428 |
| YRI | NPIP | 11977263 | 11.0297 | 15.2937 | -0.8544 |
| YRI | NPIP | 11982263 | 9.6751  | 12.9408 | -0.7668 |
| YRI | NPIP | 11987263 | 8.7315  | 11.0921 | -0.6409 |
| YRI | NPIP | 11992263 | 9.6863  | 11.4282 | -0.4599 |
| YRI | NPIP | 11997263 | 9.0536  | 12.4366 | -0.8248 |
| YRI | NPIP | 12002263 | 11.3909 | 14.6214 | -0.6756 |
| YRI | NPIP | 12007263 | 14.2721 | 18.3188 | -0.6822 |
| YRI | NPIP | 12012263 | 8.8843  | 14.7895 | -1.2216 |
| YRI | NPIP | 12017263 | 8.9906  | 15.6298 | -1.303  |
| YRI | NPIP | 12022263 | 9.1484  | 13.445  | -0.9731 |
| YRI | NPIP | 12027263 | 6.2546  | 8.5712  | -0.7995 |
| YRI | NPIP | 12032263 | 9.0472  | 11.7644 | -0.6981 |
| YRI | NPIP | 12037263 | 11.6072 | 15.4617 | -0.7643 |
| YRI | NPIP | 12042263 | 14.934  | 18.823  | -0.6387 |
| YRI | NPIP | 12047263 | 13.6636 | 17.6465 | -0.696  |
| YRI | NPIP | 12052263 | 9.8183  | 14.9575 | -1.0518 |
| YRI | NPIP | 12057263 | 12.6461 | 16.302  | -0.6892 |
| YRI | NPIP | 12062263 | 15.7025 | 19.1591 | -0.5581 |
| YRI | NPIP | 12067263 | 18.893  | 19.9994 | -0.1714 |
| YRI | NPIP | 12072263 | 21.2416 | 17.6465 | 0.6282  |
| YRI | NPIP | 12077263 | 20.0856 | 16.6382 | 0.6373  |
| YRI | NPIP | 12082263 | 17.3676 | 17.4785 | -0.0196 |
| YRI | NPIP | 12087263 | 12.0007 | 13.445  | -0.3271 |
| YRI | NPIP | 12092263 | 9.3707  | 12.4366 | -0.7475 |
| YRI | NPIP | 12097263 | 10.3422 | 16.302  | -1.1235 |
| YRI | NPIP | 12102263 | 11.5839 | 18.1507 | -1.1169 |
| YRI | NPIP | 12107263 | 9.8876  | 16.8062 | -1.2669 |
| YRI | NPIP | 12112263 | 7.1718  | 16.302  | -1.7212 |
| YRI | NPIP | 12117263 | 9.3742  | 17.4785 | -1.4292 |
| YRI | NPIP | 12122263 | 10.9288 | 17.4785 | -1.1551 |
| YRI | NPIP | 12127263 | 14.402  | 17.9827 | -0.6145 |
| YRI | NPIP | 12132263 | 16.4635 | 18.823  | -0.3875 |
| YRI | NPIP | 12137263 | 21.7909 | 21.512  | 0.0403  |
| YRI | NPIP | 12142263 | 20.7664 | 20.5036 | 0.0398  |
| YRI | NPIP | 12147263 | 17.574  | 19.4952 | -0.3051 |
| YRI | NPIP | 12152263 | 19.1386 | 19.8313 | -0.1082 |
| YRI | NPIP | 12157263 | 17.736  | 19.3272 | -0.2548 |
| YRI | NPIP | 12162263 | 19.9769 | 21.3439 | -0.1989 |
| YRI | NPIP | 12167263 | 22.046  | 21.1758 | 0.1276  |
| YRI | NPIP | 12172263 | 22.2544 | 18.4868 | 0.6296  |
| YRI | NPIP | 12177263 | 23.6489 | 18.4868 | 0.8627  |
| YRI | NPIP | 12182263 | 21.665  | 17.9827 | 0.6319  |
| YRI | NPIP | 12187263 | 13.1275 | 14.1172 | -0.214  |

## 2\_TajimasD\_data

|     |      |          |         |         |         |
|-----|------|----------|---------|---------|---------|
| YRI | NPIP | 12192263 | 8.0522  | 13.1089 | -1.173  |
| YRI | NPIP | 12197263 | 8.6957  | 12.9408 | -0.9968 |
| YRI | NPIP | 12202263 | 13.8977 | 16.6382 | -0.5067 |
| YRI | NPIP | 12207263 | 16.112  | 20.8397 | -0.704  |
| YRI | NPIP | 12212263 | 14.6065 | 19.6633 | -0.7964 |
| YRI | NPIP | 12217263 | 14.522  | 17.4785 | -0.5214 |
| YRI | NPIP | 12222263 | 13.1112 | 15.7978 | -0.5219 |
| YRI | NPIP | 12227263 | 12.652  | 15.2937 | -0.5293 |
| YRI | NPIP | 12232263 | 15.7242 | 18.3188 | -0.4374 |
| YRI | NPIP | 12237263 | 16.5619 | 20.3355 | -0.5754 |
| YRI | NPIP | 12242263 | 13.884  | 17.9827 | -0.7034 |
| YRI | NPIP | 12247263 | 15.2409 | 20.3355 | -0.7768 |
| YRI | NPIP | 12252263 | 15.1332 | 19.9994 | -0.754  |
| YRI | NPIP | 12257263 | 10.5586 | 14.2853 | -0.7968 |
| YRI | NPIP | 12262263 | 8.9606  | 12.6047 | -0.8772 |
| YRI | NPIP | 12267263 | 8.0305  | 12.9408 | -1.153  |
| YRI | NPIP | 12272263 | 6.9498  | 13.445  | -1.471  |
| YRI | NPIP | 12277263 | 7.5138  | 12.4366 | -1.2002 |
| YRI | NPIP | 12282263 | 7.8515  | 9.9157  | -0.6224 |
| YRI | NPIP | 12287263 | 7.4881  | 9.5795  | -0.6511 |
| YRI | NPIP | 12292263 | 10.6267 | 14.2853 | -0.7822 |
| YRI | NPIP | 12297263 | 10.9065 | 17.3104 | -1.1399 |
| YRI | NPIP | 12302263 | 12.9447 | 17.4785 | -0.7996 |
| YRI | NPIP | 12307263 | 18.7328 | 19.8313 | -0.1716 |
| YRI | NPIP | 12312263 | 16.9927 | 22.1842 | -0.7278 |
| YRI | NPIP | 12317263 | 12.6976 | 21.3439 | -1.2581 |
| YRI | NPIP | 12322263 | 16.0427 | 21.512  | -0.7898 |
| YRI | NPIP | 12327263 | 16.2445 | 19.9994 | -0.5818 |
| YRI | NPIP | 12332263 | 13.4043 | 18.823  | -0.89   |
| YRI | NPIP | 12337263 | 13.9127 | 20.6717 | -1.0144 |
| YRI | NPIP | 12342263 | 11.3583 | 18.6549 | -1.2088 |
| YRI | NPIP | 12347263 | 9.5538  | 16.8062 | -1.328  |
| YRI | NPIP | 12352263 | 14.5658 | 20.1675 | -0.8609 |
| YRI | NPIP | 12357263 | 17.9545 | 22.3523 | -0.612  |
| YRI | NPIP | 12362263 | 17.9877 | 23.1926 | -0.6989 |
| YRI | NPIP | 12367263 | 15.8609 | 22.8565 | -0.9527 |
| YRI | NPIP | 12372263 | 14.4462 | 18.823  | -0.7189 |
| YRI | NPIP | 12377263 | 14.8599 | 16.4701 | -0.3006 |
| YRI | NPIP | 12382263 | 12.7489 | 16.8062 | -0.7429 |
| YRI | NPIP | 12387263 | 10.4763 | 17.1423 | -1.1977 |
| YRI | NPIP | 12392263 | 10.2452 | 17.3104 | -1.2576 |
| YRI | NPIP | 12397263 | 11.0022 | 16.8062 | -1.0628 |
| YRI | NPIP | 12402263 | 10.5803 | 17.9827 | -1.2703 |
| YRI | NPIP | 12407263 | 10.1864 | 18.823  | -1.4185 |
| YRI | NPIP | 12412263 | 9.1551  | 17.1423 | -1.435  |
| YRI | NPIP | 12417263 | 11.1655 | 17.6465 | -1.1325 |
| YRI | NPIP | 12422263 | 11.959  | 17.1423 | -0.9313 |
| YRI | NPIP | 12427263 | 10.866  | 14.4534 | -0.7585 |
| YRI | NPIP | 12432263 | 9.3154  | 13.445  | -0.9352 |

## 2\_TajimasD\_data

|     |      |          |         |         |         |
|-----|------|----------|---------|---------|---------|
| YRI | NPIP | 12437263 | 15.3024 | 19.3272 | -0.6445 |
| YRI | NPIP | 12442263 | 18.5427 | 20.8397 | -0.342  |
| YRI | NPIP | 12447263 | 16.451  | 19.3272 | -0.4605 |
| YRI | NPIP | 12452263 | 20.8244 | 22.8565 | -0.2768 |
| YRI | NPIP | 12457263 | 18.0657 | 21.68   | -0.518  |
| YRI | NPIP | 12462263 | 16.7485 | 22.8565 | -0.8319 |
| YRI | NPIP | 12467263 | 18.3389 | 24.201  | -0.7554 |
| CEU | NPIP | 14208411 | 6.0647  | 9.8926  | -1.1639 |
| CEU | NPIP | 14213411 | 5.5904  | 9.0398  | -1.1405 |
| CEU | NPIP | 14218411 | 3.3368  | 6.3108  | -1.3654 |
| CEU | NPIP | 14223411 | 4.227   | 6.9931  | -1.1574 |
| CEU | NPIP | 14228411 | 4.1948  | 7.1636  | -1.2153 |
| CEU | NPIP | 14233411 | 3.4352  | 6.9931  | -1.4887 |
| CEU | NPIP | 14238411 | 4.0113  | 8.187   | -1.5128 |
| CEU | NPIP | 14243411 | 2.6065  | 5.9697  | -1.6231 |
| CEU | NPIP | 14248411 | 3.2208  | 5.9697  | -1.3267 |
| CEU | NPIP | 14253411 | 4.5304  | 8.0164  | -1.2876 |
| CEU | NPIP | 14258411 | 3.3533  | 6.6519  | -1.4442 |
| CEU | NPIP | 14263411 | 2.6471  | 6.9931  | -1.8184 |
| CEU | NPIP | 14268411 | 2.7054  | 6.6519  | -1.7279 |
| CEU | NPIP | 14273411 | 4.2088  | 7.5047  | -1.2932 |
| CEU | NPIP | 14278411 | 3.5966  | 6.8225  | -1.3804 |
| CEU | NPIP | 14283411 | 1.4725  | 3.9229  | -1.7091 |
| CEU | NPIP | 14288411 | 2.4024  | 4.4346  | -1.2751 |
| CEU | NPIP | 14293411 | 2.4752  | 3.7524  | -0.9253 |
| CEU | NPIP | 14298411 | 1.9006  | 3.7524  | -1.3416 |
| CEU | NPIP | 14303411 | 1.7809  | 4.6052  | -1.7148 |
| CEU | NPIP | 14308411 | 1.9295  | 4.2641  | -1.5155 |
| CEU | NPIP | 14313411 | 3.3375  | 5.9697  | -1.2703 |
| CEU | NPIP | 14318411 | 4.9217  | 9.3809  | -1.4245 |
| CEU | NPIP | 14323411 | 4.7394  | 9.5515  | -1.5118 |
| CEU | NPIP | 14328411 | 3.6009  | 8.5281  | -1.7192 |
| CEU | NPIP | 14333411 | 3.9184  | 9.5515  | -1.7697 |
| CEU | NPIP | 14338411 | 3.8477  | 9.3809  | -1.7676 |
| CEU | NPIP | 14343411 | 3.0524  | 6.9931  | -1.6489 |
| CEU | NPIP | 14348411 | 3.0078  | 6.3108  | -1.5165 |
| CEU | NPIP | 14353411 | 2.7969  | 6.3108  | -1.6133 |
| CEU | NPIP | 14358411 | 3.082   | 6.1402  | -1.4391 |
| CEU | NPIP | 14363411 | 4.6535  | 8.187   | -1.2801 |
| CEU | NPIP | 14368411 | 5.1556  | 9.2104  | -1.3176 |
| CEU | NPIP | 14373411 | 8.0544  | 9.7221  | -0.5154 |
| CEU | NPIP | 14378411 | 10.0647 | 8.8692  | 0.4023  |
| CEU | NPIP | 14383411 | 6.9619  | 8.187   | -0.4438 |
| CEU | NPIP | 14388411 | 5.7594  | 10.5749 | -1.3759 |
| CEU | NPIP | 14393411 | 9.8967  | 10.4043 | -0.1473 |
| CEU | NPIP | 14398411 | 12.216  | 8.0164  | 1.5511  |
| CEU | NPIP | 14403411 | 11.8732 | 9.2104  | 0.8653  |
| CEU | NPIP | 14408411 | 10.9528 | 9.5515  | 0.4402  |
| CEU | NPIP | 14413411 | 9.0641  | 8.5281  | 0.187   |

## 2\_TajimasD\_data

|     |      |          |         |         |         |
|-----|------|----------|---------|---------|---------|
| CEU | NPIP | 14418411 | 7.5935  | 8.0164  | -0.1562 |
| CEU | NPIP | 14423411 | 8.8013  | 7.5047  | 0.5087  |
| CEU | NPIP | 14428411 | 11.523  | 8.5281  | 1.045   |
| CEU | NPIP | 14433411 | 8.6825  | 6.6519  | 0.889   |
| CEU | NPIP | 14438411 | 9.0672  | 5.9697  | 1.4949  |
| CEU | NPIP | 14443411 | 10.0254 | 9.3809  | 0.2059  |
| CEU | NPIP | 14448411 | 9.9773  | 9.7221  | 0.0789  |
| CEU | NPIP | 14453411 | 15.055  | 10.7454 | 1.213   |
| CEU | NPIP | 14458411 | 15.4671 | 11.2571 | 1.1344  |
| CEU | NPIP | 14463411 | 13.4313 | 10.4043 | 0.8781  |
| CEU | NPIP | 14468411 | 15.0122 | 14.3272 | 0.147   |
| CEU | NPIP | 14473411 | 14.0062 | 14.6684 | -0.1389 |
| CEU | NPIP | 14478411 | 6.871   | 8.187   | -0.4768 |
| CEU | NPIP | 14483411 | 3.3201  | 4.9463  | -0.9274 |
| CEU | NPIP | 14488411 | 4.3181  | 5.7991  | -0.7335 |
| CEU | NPIP | 14493411 | 5.9134  | 6.3108  | -0.1825 |
| CEU | NPIP | 14498411 | 5.9866  | 5.7991  | 0.0929  |
| CEU | NPIP | 14503411 | 4.4714  | 5.1169  | -0.3573 |
| CEU | NPIP | 14508411 | 4.6623  | 6.1402  | -0.6955 |
| CEU | NPIP | 14513411 | 3.0812  | 5.458   | -1.2425 |
| CEU | NPIP | 14518411 | 1.8369  | 4.7757  | -1.7284 |
| CEU | NPIP | 14523411 | 3.3088  | 6.4814  | -1.422  |
| CEU | NPIP | 14528411 | 4.0994  | 6.9931  | -1.2108 |
| CEU | NPIP | 14533411 | 4.0744  | 6.1402  | -0.9721 |
| CEU | NPIP | 14538411 | 3.8946  | 5.7991  | -0.9433 |
| CEU | NPIP | 14543411 | 3.7294  | 6.4814  | -1.2335 |
| CEU | NPIP | 14548411 | 3.1156  | 5.7991  | -1.3291 |
| CEU | NPIP | 14553411 | 2.1738  | 4.6052  | -1.4762 |
| CEU | NPIP | 14558411 | 2.2371  | 4.7757  | -1.4931 |
| CEU | NPIP | 14563411 | 3.7526  | 6.3108  | -1.1745 |
| CEU | NPIP | 14568411 | 2.7718  | 5.458   | -1.4043 |
| CEU | NPIP | 14573411 | 2.4618  | 5.9697  | -1.693  |
| CEU | NPIP | 14578411 | 2.8526  | 6.9931  | -1.7325 |
| CEU | NPIP | 14583411 | 1.4785  | 4.7757  | -1.9392 |
| CEU | NPIP | 14588411 | 1.9351  | 5.9697  | -1.9472 |
| CEU | NPIP | 14593411 | 2.5013  | 7.5047  | -1.9631 |
| CEU | NPIP | 14598411 | 3.4958  | 5.9697  | -1.1939 |
| CEU | NPIP | 14603411 | 2.3692  | 3.5818  | -0.9139 |
| CEU | NPIP | 14608411 | 1.471   | 3.9229  | -1.7101 |
| CEU | NPIP | 14613411 | 2.8759  | 5.7991  | -1.4478 |
| CEU | NPIP | 14618411 | 3.108   | 4.7757  | -0.9808 |
| CEU | NPIP | 14623411 | 8.0181  | 6.3108  | 0.7839  |
| CEU | NPIP | 14628411 | 9.5112  | 7.5047  | 0.7873  |
| CEU | NPIP | 14633411 | 9.2569  | 8.187   | 0.3876  |
| CEU | NPIP | 14638411 | 9.8308  | 8.5281  | 0.4545  |
| CEU | NPIP | 14643411 | 5.0814  | 5.458   | -0.1969 |
| CEU | NPIP | 14648411 | 4.5428  | 5.9697  | -0.6886 |
| CEU | NPIP | 14653411 | 5.0664  | 6.3108  | -0.5713 |
| CEU | NPIP | 14658411 | 3.818   | 6.1402  | -1.0928 |

## 2\_TajimasD\_data

|     |      |          |        |        |         |
|-----|------|----------|--------|--------|---------|
| CEU | NPIP | 14663411 | 3.1686 | 7.3342 | -1.669  |
| CEU | NPIP | 14668411 | 3.6731 | 7.5047 | -1.5033 |
| CEU | NPIP | 14673411 | 5.2643 | 5.9697 | -0.3404 |
| CEU | NPIP | 14678411 | 4.8186 | 4.7757 | 0.0252  |
| CEU | NPIP | 14683411 | 3.4197 | 5.6286 | -1.1236 |
| CEU | NPIP | 14688411 | 2.5558 | 5.9697 | -1.6476 |
| CEU | NPIP | 14693411 | 1.9977 | 6.3108 | -1.9802 |
| CEU | NPIP | 14698411 | 3.9732 | 7.1636 | -1.306  |
| CEU | NPIP | 14703411 | 4.9518 | 6.8225 | -0.8005 |
| CEU | NPIP | 14708411 | 4.9079 | 7.1636 | -0.9234 |
| CEU | NPIP | 14713411 | 3.1773 | 6.1402 | -1.3943 |
| CEU | NPIP | 14718411 | 0.6505 | 3.7524 | -2.2473 |
| CEU | NPIP | 14723411 | 0.9038 | 3.7524 | -2.0638 |
| CEU | NPIP | 14728411 | 2.3668 | 4.6052 | -1.359  |
| CEU | NPIP | 14733411 | 3.8521 | 5.1169 | -0.7001 |
| CEU | NPIP | 14738411 | 3.5958 | 4.9463 | -0.7702 |
| CEU | NPIP | 14743411 | 1.7481 | 4.2641 | -1.6332 |
| CEU | NPIP | 14748411 | 1.7868 | 4.7757 | -1.7579 |
| CEU | NPIP | 14753411 | 2.9276 | 5.1169 | -1.2118 |
| CEU | NPIP | 14758411 | 2.7547 | 5.1169 | -1.3075 |
| CEU | NPIP | 14763411 | 2.3026 | 5.7991 | -1.7318 |
| CEU | NPIP | 14768411 | 1.9701 | 5.2874 | -1.7837 |
| CEU | NPIP | 14773411 | 3.0179 | 4.6052 | -0.9637 |
| CEU | NPIP | 14778411 | 3.8887 | 5.6286 | -0.885  |
| CEU | NPIP | 14783411 | 1.9656 | 3.7524 | -1.2945 |
| CEU | NPIP | 14788411 | 0.0602 | 0.3411 | -1.126  |
| CEU | NPIP | 14793411 | 0.0101 | 0.1706 | -0.9534 |
| CEU | NPIP | 14798411 | 0.0101 | 0.1706 | -0.9534 |
| CEU | NPIP | 14803411 | 0      | 0      | 0       |
| CEU | NPIP | 14808411 | 0      | 0      | 0       |
| CEU | NPIP | 14813411 | 0      | 0      | 0       |
| CEU | NPIP | 14818411 | 0.1309 | 0.1706 | -0.2358 |
| CEU | NPIP | 14823411 | 0.5803 | 1.0234 | -0.8805 |
| CEU | NPIP | 14828411 | 0.4494 | 0.8528 | -0.9084 |
| CEU | NPIP | 14833411 | 0.095  | 0.1706 | -0.4491 |
| CEU | NPIP | 14838411 | 0.095  | 0.1706 | -0.4491 |
| CEU | NPIP | 14843411 | 0.0202 | 0.1706 | -0.8934 |
| CEU | NPIP | 14848411 | 0.1441 | 0.3411 | -0.7897 |
| CEU | NPIP | 14853411 | 0.1239 | 0.1706 | -0.2774 |
| CEU | NPIP | 14858411 | 1.0208 | 1.5351 | -0.7626 |
| CEU | NPIP | 14863411 | 3.9676 | 4.7757 | -0.4753 |
| CEU | NPIP | 14868411 | 5.6162 | 6.8225 | -0.5162 |
| CEU | NPIP | 14873411 | 2.9542 | 4.2641 | -0.8503 |
| CEU | NPIP | 14878411 | 0.8417 | 1.5351 | -1.0282 |
| CEU | NPIP | 14883411 | 1.0025 | 1.0234 | -0.0415 |
| CEU | NPIP | 14888411 | 0.8955 | 0.6822 | 0.557   |
| CEU | NPIP | 14893411 | 0.7318 | 1.7056 | -1.3337 |
| CEU | NPIP | 14898411 | 1.9105 | 3.4112 | -1.1787 |
| CEU | NPIP | 14903411 | 1.7873 | 3.7524 | -1.4237 |

## 2\_TajimasD\_data

|     |      |          |         |         |         |
|-----|------|----------|---------|---------|---------|
| CEU | NPIP | 14908411 | 0.959   | 3.0701  | -1.8109 |
| CEU | NPIP | 14913411 | 1.8516  | 3.4112  | -1.2249 |
| CEU | NPIP | 14918411 | 1.1515  | 2.5584  | -1.4015 |
| CEU | NPIP | 14923411 | 0.9248  | 2.0467  | -1.3349 |
| CEU | NPIP | 14928411 | 2.2674  | 3.4112  | -0.8984 |
| CEU | NPIP | 14933411 | 2.214   | 3.0701  | -0.7343 |
| CEU | NPIP | 14938411 | 1.3983  | 2.2173  | -0.915  |
| CEU | NPIP | 14943411 | 1.3181  | 2.729   | -1.3336 |
| CEU | NPIP | 14948411 | 1.8021  | 3.2407  | -1.1796 |
| CEU | NPIP | 14953411 | 1.6075  | 3.4112  | -1.4167 |
| CEU | NPIP | 14958411 | 2.2165  | 4.4346  | -1.3917 |
| CEU | NPIP | 14963411 | 4.7633  | 5.2874  | -0.2818 |
| CEU | NPIP | 14968411 | 4.9204  | 4.7757  | 0.0851  |
| CEU | NPIP | 14973411 | 2.2742  | 3.5818  | -0.9855 |
| CEU | NPIP | 14978411 | 1.1325  | 3.5818  | -1.846  |
| CEU | NPIP | 14983411 | 1.4117  | 3.9229  | -1.7515 |
| CEU | NPIP | 14988411 | 0.8932  | 3.0701  | -1.8673 |
| CEU | NPIP | 14993411 | 0.6423  | 3.0701  | -2.0825 |
| CEU | NPIP | 14998411 | 0.4651  | 1.8762  | -1.7966 |
| CEU | NPIP | 15003411 | 0.3834  | 0.6822  | -0.7803 |
| CEU | NPIP | 15008411 | 0.3537  | 0.6822  | -0.8578 |
| CEU | NPIP | 15013411 | 0.0998  | 0.8528  | -1.6957 |
| CEU | NPIP | 15018411 | 1.536   | 2.2173  | -0.7611 |
| CEU | NPIP | 15023411 | 2.3593  | 2.5584  | -0.1983 |
| CEU | NPIP | 15028411 | 1.4475  | 1.7056  | -0.3535 |
| CEU | NPIP | 15033411 | 0.9948  | 1.8762  | -1.1222 |
| CEU | NPIP | 15038411 | 0.9091  | 1.7056  | -1.0909 |
| CEU | NPIP | 15043411 | 2.1816  | 2.729   | -0.5174 |
| CEU | NPIP | 15048411 | 4.6071  | 6.4814  | -0.8401 |
| CEU | NPIP | 15053411 | 6.0375  | 7.5047  | -0.5757 |
| CEU | NPIP | 15058411 | 6.5943  | 8.0164  | -0.5253 |
| CEU | NPIP | 15063411 | 4.7539  | 7.3342  | -1.0338 |
| CEU | NPIP | 15068411 | 3.6557  | 5.458   | -0.9422 |
| CEU | NPIP | 15073411 | 5.1837  | 5.7991  | -0.3048 |
| CEU | NPIP | 15078411 | 5.2356  | 7.3342  | -0.8408 |
| CEU | NPIP | 15083411 | 6.2653  | 8.5281  | -0.7895 |
| CEU | NPIP | 15088411 | 6.7116  | 7.3342  | -0.2495 |
| CEU | NPIP | 15093411 | 4.9349  | 6.8225  | -0.8077 |
| CEU | NPIP | 15098411 | 4.035   | 6.4814  | -1.0965 |
| CEU | NPIP | 15103411 | 4.7675  | 7.1636  | -0.9808 |
| CEU | NPIP | 15108411 | 4.6226  | 6.6519  | -0.8885 |
| CEU | NPIP | 15113411 | 5.106   | 6.4814  | -0.6165 |
| CEU | NPIP | 15118411 | 6.5613  | 8.0164  | -0.5374 |
| CEU | NPIP | 15123411 | 6.3676  | 7.8459  | -0.5569 |
| CEU | NPIP | 15128411 | 10.6895 | 9.0398  | 0.5454  |
| CEU | NPIP | 15133411 | 12.1507 | 10.7454 | 0.3956  |
| CEU | NPIP | 15138411 | 9.9922  | 9.2104  | 0.254   |
| CEU | NPIP | 15143411 | 9.8042  | 7.1636  | 1.0809  |
| CEU | NPIP | 15148411 | 7.925   | 6.6519  | 0.5574  |

## 2\_TajimasD\_data

|     |      |          |         |         |         |
|-----|------|----------|---------|---------|---------|
| CEU | NPIP | 15153411 | 6.4482  | 7.6753  | -0.4717 |
| CEU | NPIP | 15158411 | 5.5991  | 6.4814  | -0.3955 |
| CEU | NPIP | 15163411 | 4.7982  | 4.6052  | 0.1172  |
| CEU | NPIP | 15168411 | 7.4799  | 7.5047  | -0.0097 |
| CEU | NPIP | 15173411 | 9.7846  | 8.8692  | 0.308   |
| CEU | NPIP | 15178411 | 6.5351  | 6.8225  | -0.123  |
| CEU | NPIP | 15183411 | 4.6966  | 6.4814  | -0.8    |
| CEU | NPIP | 15188411 | 3.733   | 6.3108  | -1.1835 |
| CEU | NPIP | 15193411 | 2.671   | 6.6519  | -1.7429 |
| CEU | NPIP | 15198411 | 4.5826  | 6.8225  | -0.9584 |
| CEU | NPIP | 15203411 | 5.0233  | 5.9697  | -0.4567 |
| CEU | NPIP | 15208411 | 3.2665  | 4.6052  | -0.8128 |
| CEU | NPIP | 15213411 | 1.7143  | 2.729   | -0.9591 |
| CEU | NPIP | 15218411 | 3.7464  | 7.1636  | -1.3988 |
| CHB | NPIP | 14208411 | 13.9318 | 10.5037 | 0.9828  |
| CHB | NPIP | 14213411 | 11.9876 | 9.8261  | 0.6595  |
| CHB | NPIP | 14218411 | 7.1095  | 7.2848  | -0.0705 |
| CHB | NPIP | 14223411 | 9.8867  | 9.9955  | -0.0327 |
| CHB | NPIP | 14228411 | 10.1786 | 10.6731 | -0.1397 |
| CHB | NPIP | 14233411 | 8.925   | 9.9955  | -0.3215 |
| CHB | NPIP | 14238411 | 8.5871  | 10.1649 | -0.4664 |
| CHB | NPIP | 14243411 | 4.9398  | 6.6072  | -0.7323 |
| CHB | NPIP | 14248411 | 7.5285  | 7.2848  | 0.098   |
| CHB | NPIP | 14253411 | 9.9339  | 9.9955  | -0.0185 |
| CHB | NPIP | 14258411 | 6.2218  | 7.6237  | -0.5406 |
| CHB | NPIP | 14263411 | 4.189   | 6.6072  | -1.0621 |
| CHB | NPIP | 14268411 | 3.6802  | 7.4543  | -1.4856 |
| CHB | NPIP | 14273411 | 4.7443  | 8.979   | -1.4048 |
| CHB | NPIP | 14278411 | 3.9646  | 8.6402  | -1.6072 |
| CHB | NPIP | 14283411 | 1.5188  | 6.4378  | -2.2117 |
| CHB | NPIP | 14288411 | 2.5271  | 6.946   | -1.8549 |
| CHB | NPIP | 14293411 | 3.2201  | 6.0989  | -1.3589 |
| CHB | NPIP | 14298411 | 2.9825  | 5.4213  | -1.2788 |
| CHB | NPIP | 14303411 | 3.0444  | 6.946   | -1.6377 |
| CHB | NPIP | 14308411 | 3.237   | 5.9295  | -1.3035 |
| CHB | NPIP | 14313411 | 4.6345  | 7.2848  | -1.0653 |
| CHB | NPIP | 14318411 | 7.7907  | 11.8591 | -1.0409 |
| CHB | NPIP | 14323411 | 6.2719  | 12.0285 | -1.4532 |
| CHB | NPIP | 14328411 | 2.6019  | 10.1649 | -2.2357 |
| CHB | NPIP | 14333411 | 3.9661  | 11.1814 | -1.951  |
| CHB | NPIP | 14338411 | 4.4274  | 9.9955  | -1.672  |
| CHB | NPIP | 14343411 | 4.5267  | 7.9625  | -1.2732 |
| CHB | NPIP | 14348411 | 4.194   | 7.7931  | -1.3603 |
| CHB | NPIP | 14353411 | 4.6235  | 6.946   | -0.9749 |
| CHB | NPIP | 14358411 | 6.1643  | 6.2684  | -0.0479 |
| CHB | NPIP | 14363411 | 8.2336  | 7.2848  | 0.3814  |
| CHB | NPIP | 14368411 | 8.9437  | 9.4872  | -0.1713 |
| CHB | NPIP | 14373411 | 9.8418  | 11.3508 | -0.4023 |
| CHB | NPIP | 14378411 | 10.4694 | 9.6567  | 0.252   |

## 2\_TajimasD\_data

|     |      |          |         |         |         |
|-----|------|----------|---------|---------|---------|
| CHB | NPIP | 14383411 | 6.7786  | 7.2848  | -0.2035 |
| CHB | NPIP | 14388411 | 5.0253  | 7.6237  | -1.002  |
| CHB | NPIP | 14393411 | 10.0846 | 8.6402  | 0.4965  |
| CHB | NPIP | 14398411 | 11.367  | 9.1484  | 0.7233  |
| CHB | NPIP | 14403411 | 10.4073 | 12.1979 | -0.4461 |
| CHB | NPIP | 14408411 | 11.2728 | 11.3508 | -0.0208 |
| CHB | NPIP | 14413411 | 9.9815  | 9.4872  | 0.1558  |
| CHB | NPIP | 14418411 | 8.185   | 9.9955  | -0.5437 |
| CHB | NPIP | 14423411 | 8.7984  | 9.3178  | -0.1665 |
| CHB | NPIP | 14428411 | 11.5094 | 8.3013  | 1.1442  |
| CHB | NPIP | 14433411 | 8.7816  | 6.4378  | 1.0538  |
| CHB | NPIP | 14438411 | 9.3398  | 8.6402  | 0.2405  |
| CHB | NPIP | 14443411 | 10.2283 | 10.3343 | -0.0309 |
| CHB | NPIP | 14448411 | 9.8441  | 9.3178  | 0.1687  |
| CHB | NPIP | 14453411 | 14.9223 | 10.6731 | 1.2001  |
| CHB | NPIP | 14458411 | 15.0082 | 11.8591 | 0.8057  |
| CHB | NPIP | 14463411 | 11.3331 | 12.3673 | -0.2543 |
| CHB | NPIP | 14468411 | 11.9962 | 14.2309 | -0.4812 |
| CHB | NPIP | 14473411 | 11.6589 | 13.3838 | -0.3937 |
| CHB | NPIP | 14478411 | 5.9037  | 7.7931  | -0.7141 |
| CHB | NPIP | 14483411 | 2.6393  | 5.0825  | -1.3564 |
| CHB | NPIP | 14488411 | 2.7689  | 6.4378  | -1.6497 |
| CHB | NPIP | 14493411 | 3.238   | 6.6072  | -1.4798 |
| CHB | NPIP | 14498411 | 3.5865  | 6.2684  | -1.2352 |
| CHB | NPIP | 14503411 | 3.3322  | 5.4213  | -1.0955 |
| CHB | NPIP | 14508411 | 4.3013  | 5.9295  | -0.7882 |
| CHB | NPIP | 14513411 | 3.0505  | 6.2684  | -1.482  |
| CHB | NPIP | 14518411 | 0.9861  | 5.9295  | -2.3932 |
| CHB | NPIP | 14523411 | 0.7811  | 6.4378  | -2.5434 |
| CHB | NPIP | 14528411 | 1.8816  | 6.0989  | -1.9907 |
| CHB | NPIP | 14533411 | 3.5808  | 4.913   | -0.762  |
| CHB | NPIP | 14538411 | 4.4784  | 5.4213  | -0.4944 |
| CHB | NPIP | 14543411 | 5.9657  | 7.4543  | -0.586  |
| CHB | NPIP | 14548411 | 4.8279  | 7.2848  | -0.9876 |
| CHB | NPIP | 14553411 | 2.5239  | 5.7601  | -1.6078 |
| CHB | NPIP | 14558411 | 1.6452  | 3.8965  | -1.5746 |
| CHB | NPIP | 14563411 | 2.2083  | 4.4048  | -1.3821 |
| CHB | NPIP | 14568411 | 2.0256  | 6.4378  | -1.9839 |
| CHB | NPIP | 14573411 | 1.1766  | 5.7601  | -2.2772 |
| CHB | NPIP | 14578411 | 1.7887  | 5.2519  | -1.8678 |
| CHB | NPIP | 14583411 | 1.1799  | 4.913   | -2.1353 |
| CHB | NPIP | 14588411 | 1.3745  | 5.5907  | -2.1512 |
| CHB | NPIP | 14593411 | 1.3377  | 6.4378  | -2.2932 |
| CHB | NPIP | 14598411 | 0.878   | 5.5907  | -2.4045 |
| CHB | NPIP | 14603411 | 0.9872  | 4.5742  | -2.1842 |
| CHB | NPIP | 14608411 | 0.5346  | 4.066   | -2.3813 |
| CHB | NPIP | 14613411 | 0.857   | 4.7436  | -2.2926 |
| CHB | NPIP | 14618411 | 1.0822  | 4.913   | -2.1912 |
| CHB | NPIP | 14623411 | 1.6337  | 8.6402  | -2.4084 |



## 2\_TajimasD\_data

|     |      |          |        |        |         |
|-----|------|----------|--------|--------|---------|
| CHB | NPIP | 14628411 | 2.1157 | 9.8261 | -2.3525 |
| CHB | NPIP | 14633411 | 3.4076 | 7.6237 | -1.6258 |
| CHB | NPIP | 14638411 | 3.5865 | 7.1154 | -1.4492 |
| CHB | NPIP | 14643411 | 1.9126 | 6.2684 | -2.0061 |
| CHB | NPIP | 14648411 | 1.6097 | 7.7931 | -2.337  |
| CHB | NPIP | 14653411 | 2.119  | 8.6402 | -2.2416 |
| CHB | NPIP | 14658411 | 2.016  | 7.1154 | -2.0942 |
| CHB | NPIP | 14663411 | 1.0754 | 5.9295 | -2.3499 |
| CHB | NPIP | 14668411 | 2.1235 | 6.7766 | -1.9974 |
| CHB | NPIP | 14673411 | 2.4453 | 6.946  | -1.8892 |
| CHB | NPIP | 14678411 | 1.3457 | 5.2519 | -2.1067 |
| CHB | NPIP | 14683411 | 1.8852 | 5.0825 | -1.7751 |
| CHB | NPIP | 14688411 | 2.5435 | 7.9625 | -2.0081 |
| CHB | NPIP | 14693411 | 2.0638 | 8.6402 | -2.2605 |
| CHB | NPIP | 14698411 | 2.8726 | 6.4378 | -1.603  |
| CHB | NPIP | 14703411 | 3.6724 | 6.6072 | -1.289  |
| CHB | NPIP | 14708411 | 3.5125 | 7.9625 | -1.649  |
| CHB | NPIP | 14713411 | 2.2975 | 6.6072 | -1.8929 |
| CHB | NPIP | 14718411 | 0.7002 | 4.2354 | -2.3014 |
| CHB | NPIP | 14723411 | 0.7874 | 4.066  | -2.2109 |
| CHB | NPIP | 14728411 | 1.3617 | 4.066  | -1.8236 |
| CHB | NPIP | 14733411 | 2.6988 | 4.7436 | -1.2062 |
| CHB | NPIP | 14738411 | 3.0249 | 4.913  | -1.08   |
| CHB | NPIP | 14743411 | 2.0613 | 4.913  | -1.6312 |
| CHB | NPIP | 14748411 | 2.0148 | 6.6072 | -2.017  |
| CHB | NPIP | 14753411 | 2.0619 | 5.9295 | -1.8724 |
| CHB | NPIP | 14758411 | 1.751  | 5.4213 | -1.9246 |
| CHB | NPIP | 14763411 | 1.3501 | 5.7601 | -2.191  |
| CHB | NPIP | 14768411 | 1.5159 | 4.7436 | -1.9039 |
| CHB | NPIP | 14773411 | 2.5709 | 5.5907 | -1.5408 |
| CHB | NPIP | 14778411 | 3.4392 | 6.7766 | -1.4326 |
| CHB | NPIP | 14783411 | 2.2107 | 4.2354 | -1.3181 |
| CHB | NPIP | 14788411 | 0.2915 | 0.6777 | -1.0096 |
| CHB | NPIP | 14793411 | 0      | 0      | 0       |
| CHB | NPIP | 14798411 | 0      | 0      | 0       |
| CHB | NPIP | 14803411 | 0      | 0      | 0       |
| CHB | NPIP | 14808411 | 0      | 0      | 0       |
| CHB | NPIP | 14813411 | 0.0097 | 0.1694 | -0.949  |
| CHB | NPIP | 14818411 | 0.0194 | 0.3388 | -1.2812 |
| CHB | NPIP | 14823411 | 0.5071 | 0.8471 | -0.7667 |
| CHB | NPIP | 14828411 | 0.4974 | 0.6777 | -0.4714 |
| CHB | NPIP | 14833411 | 0.0377 | 0.1694 | -0.7826 |
| CHB | NPIP | 14838411 | 0.0377 | 0.1694 | -0.7826 |
| CHB | NPIP | 14843411 | 0      | 0      | 0       |
| CHB | NPIP | 14848411 | 0.2142 | 0.1694 | 0.2662  |
| CHB | NPIP | 14853411 | 0.2142 | 0.1694 | 0.2662  |
| CHB | NPIP | 14858411 | 1.3944 | 1.1859 | 0.3722  |
| CHB | NPIP | 14863411 | 4.1315 | 4.4048 | -0.172  |
| CHB | NPIP | 14868411 | 6.5858 | 6.4378 | 0.0665  |

## 2\_TajimasD\_data

|     |      |          |        |        |         |
|-----|------|----------|--------|--------|---------|
| CHB | NPIP | 14873411 | 4.4447 | 3.8965 | 0.3834  |
| CHB | NPIP | 14878411 | 1.1542 | 1.3553 | -0.3259 |
| CHB | NPIP | 14883411 | 0.7087 | 0.8471 | -0.3121 |
| CHB | NPIP | 14888411 | 0.1989 | 0.6777 | -1.2517 |
| CHB | NPIP | 14893411 | 0.3628 | 2.2024 | -2.0599 |
| CHB | NPIP | 14898411 | 1.9823 | 2.5412 | -0.5581 |
| CHB | NPIP | 14903411 | 1.9115 | 1.5247 | 0.5746  |
| CHB | NPIP | 14908411 | 1.4064 | 1.6942 | -0.395  |
| CHB | NPIP | 14913411 | 2.4626 | 1.8636 | 0.7642  |
| CHB | NPIP | 14918411 | 1.4156 | 1.8636 | -0.5716 |
| CHB | NPIP | 14923411 | 0.7472 | 2.033  | -1.5333 |
| CHB | NPIP | 14928411 | 1.8382 | 3.2189 | -1.1351 |
| CHB | NPIP | 14933411 | 2.234  | 3.2189 | -0.8097 |
| CHB | NPIP | 14938411 | 1.0952 | 2.2024 | -1.2398 |
| CHB | NPIP | 14943411 | 1.0364 | 2.3718 | -1.4096 |
| CHB | NPIP | 14948411 | 2.2075 | 3.0495 | -0.7241 |
| CHB | NPIP | 14953411 | 1.3263 | 3.0495 | -1.482  |
| CHB | NPIP | 14958411 | 1.3842 | 3.7271 | -1.7021 |
| CHB | NPIP | 14963411 | 4.9743 | 5.0825 | -0.0601 |
| CHB | NPIP | 14968411 | 5.7379 | 4.913  | 0.4718  |
| CHB | NPIP | 14973411 | 2.7021 | 5.0825 | -1.3216 |
| CHB | NPIP | 14978411 | 2.0621 | 4.7436 | -1.5818 |
| CHB | NPIP | 14983411 | 2.5155 | 3.3883 | -0.6873 |
| CHB | NPIP | 14988411 | 1.1727 | 2.7106 | -1.4572 |
| CHB | NPIP | 14993411 | 0.7588 | 2.7106 | -1.8494 |
| CHB | NPIP | 14998411 | 0.6908 | 1.5247 | -1.2389 |
| CHB | NPIP | 15003411 | 0.7936 | 0.6777 | 0.303   |
| CHB | NPIP | 15008411 | 0.7936 | 0.6777 | 0.303   |
| CHB | NPIP | 15013411 | 0.1043 | 0.6777 | -1.499  |
| CHB | NPIP | 15018411 | 1.6682 | 1.6942 | -0.0357 |
| CHB | NPIP | 15023411 | 2.9482 | 3.2189 | -0.2226 |
| CHB | NPIP | 15028411 | 1.7489 | 3.0495 | -1.1185 |
| CHB | NPIP | 15033411 | 0.4892 | 1.6942 | -1.6537 |
| CHB | NPIP | 15038411 | 0.5711 | 1.0165 | -0.8864 |
| CHB | NPIP | 15043411 | 2.7683 | 3.2189 | -0.3705 |
| CHB | NPIP | 15048411 | 5.9299 | 6.6072 | -0.2975 |
| CHB | NPIP | 15053411 | 6.139  | 7.1154 | -0.401  |
| CHB | NPIP | 15058411 | 6.8869 | 7.1154 | -0.0938 |
| CHB | NPIP | 15063411 | 5.6889 | 6.7766 | -0.4669 |
| CHB | NPIP | 15068411 | 3.6526 | 5.5907 | -0.9889 |
| CHB | NPIP | 15073411 | 5.3217 | 5.7601 | -0.2178 |
| CHB | NPIP | 15078411 | 5.1536 | 5.9295 | -0.3756 |
| CHB | NPIP | 15083411 | 5.6697 | 6.2684 | -0.2757 |
| CHB | NPIP | 15088411 | 6.6501 | 6.946  | -0.1242 |
| CHB | NPIP | 15093411 | 5.1211 | 6.6072 | -0.6527 |
| CHB | NPIP | 15098411 | 4.2998 | 6.7766 | -1.0632 |
| CHB | NPIP | 15103411 | 4.6238 | 6.6072 | -0.8711 |
| CHB | NPIP | 15108411 | 4.5397 | 5.7601 | -0.6063 |
| CHB | NPIP | 15113411 | 5.6587 | 5.7601 | -0.0504 |

## 2\_TajimasD\_data

|     |      |          |         |         |         |
|-----|------|----------|---------|---------|---------|
| CHB | NPIP | 15118411 | 6.1523  | 5.5907  | 0.2865  |
| CHB | NPIP | 15123411 | 6.0598  | 5.0825  | 0.5426  |
| CHB | NPIP | 15128411 | 11.8557 | 8.3013  | 1.2677  |
| CHB | NPIP | 15133411 | 13.2977 | 10.3343 | 0.8626  |
| CHB | NPIP | 15138411 | 10.8818 | 8.4708  | 0.844   |
| CHB | NPIP | 15143411 | 11.3217 | 7.2848  | 1.6227  |
| CHB | NPIP | 15148411 | 8.4049  | 6.0989  | 1.0885  |
| CHB | NPIP | 15153411 | 7.1788  | 7.1154  | 0.026   |
| CHB | NPIP | 15158411 | 7.134   | 6.6072  | 0.2314  |
| CHB | NPIP | 15163411 | 5.5005  | 5.4213  | 0.0415  |
| CHB | NPIP | 15168411 | 8.2599  | 7.4543  | 0.3171  |
| CHB | NPIP | 15173411 | 10.6185 | 8.3013  | 0.8264  |
| CHB | NPIP | 15178411 | 7.4335  | 6.6072  | 0.3629  |
| CHB | NPIP | 15183411 | 5.4833  | 6.2684  | -0.3616 |
| CHB | NPIP | 15188411 | 3.9753  | 5.2519  | -0.6885 |
| CHB | NPIP | 15193411 | 3.5871  | 5.2519  | -0.8979 |
| CHB | NPIP | 15198411 | 4.9402  | 6.4378  | -0.6734 |
| CHB | NPIP | 15203411 | 4.8915  | 4.913   | -0.0123 |
| CHB | NPIP | 15208411 | 4.0695  | 3.5577  | 0.3868  |
| CHB | NPIP | 15213411 | 2.3499  | 2.5412  | -0.191  |
| CHB | NPIP | 15218411 | 5.8388  | 6.7766  | -0.4026 |
| YRI | NPIP | 14208411 | 15.3227 | 18.1507 | -0.481  |
| YRI | NPIP | 14213411 | 16.3256 | 16.134  | 0.0365  |
| YRI | NPIP | 14218411 | 10.0332 | 11.2602 | -0.3285 |
| YRI | NPIP | 14223411 | 15.4585 | 14.6214 | 0.1751  |
| YRI | NPIP | 14228411 | 16.5069 | 16.9743 | -0.0848 |
| YRI | NPIP | 14233411 | 13.5105 | 14.2853 | -0.1657 |
| YRI | NPIP | 14238411 | 17.0548 | 14.2853 | 0.5921  |
| YRI | NPIP | 14243411 | 12.9135 | 13.1089 | -0.0453 |
| YRI | NPIP | 14248411 | 12.2526 | 11.9324 | 0.0812  |
| YRI | NPIP | 14253411 | 16.4247 | 14.6214 | 0.3771  |
| YRI | NPIP | 14258411 | 12.6207 | 14.1172 | -0.3236 |
| YRI | NPIP | 14263411 | 10.0172 | 11.0921 | -0.2918 |
| YRI | NPIP | 14268411 | 10.0993 | 10.5879 | -0.1386 |
| YRI | NPIP | 14273411 | 11.3949 | 11.7644 | -0.0949 |
| YRI | NPIP | 14278411 | 11.6607 | 10.5879 | 0.3042  |
| YRI | NPIP | 14283411 | 7.8666  | 9.7476  | -0.5762 |
| YRI | NPIP | 14288411 | 6.3401  | 9.9157  | -1.078  |
| YRI | NPIP | 14293411 | 6.3629  | 8.9073  | -0.8474 |
| YRI | NPIP | 14298411 | 5.4014  | 8.235   | -1.0146 |
| YRI | NPIP | 14303411 | 6.0414  | 7.8989  | -0.691  |
| YRI | NPIP | 14308411 | 5.5682  | 8.9073  | -1.1121 |
| YRI | NPIP | 14313411 | 6.7116  | 10.4199 | -1.0675 |
| YRI | NPIP | 14318411 | 14.2337 | 15.2937 | -0.2124 |
| YRI | NPIP | 14323411 | 16.8369 | 17.6465 | -0.1415 |
| YRI | NPIP | 14328411 | 14.4537 | 14.2853 | 0.036   |
| YRI | NPIP | 14333411 | 15.5628 | 14.1172 | 0.3126  |
| YRI | NPIP | 14338411 | 13.8947 | 15.4617 | -0.3107 |
| YRI | NPIP | 14343411 | 9.8294  | 16.302  | -1.2202 |

## 2\_TajimasD\_data

|     |      |          |         |         |         |
|-----|------|----------|---------|---------|---------|
| YRI | NPIP | 14348411 | 9.6436  | 15.6298 | -1.1748 |
| YRI | NPIP | 14353411 | 9.3366  | 13.2769 | -0.9031 |
| YRI | NPIP | 14358411 | 9.0461  | 13.1089 | -0.9424 |
| YRI | NPIP | 14363411 | 12.1456 | 13.1089 | -0.2235 |
| YRI | NPIP | 14368411 | 15.0569 | 13.9492 | 0.2423  |
| YRI | NPIP | 14373411 | 17.2755 | 16.8062 | 0.0859  |
| YRI | NPIP | 14378411 | 15.0849 | 15.7978 | -0.1385 |
| YRI | NPIP | 14383411 | 11.3519 | 15.6298 | -0.8396 |
| YRI | NPIP | 14388411 | 12.3101 | 17.8146 | -0.9532 |
| YRI | NPIP | 14393411 | 14.2923 | 15.4617 | -0.2319 |
| YRI | NPIP | 14398411 | 14.1752 | 14.1172 | 0.0125  |
| YRI | NPIP | 14403411 | 16.0668 | 17.8146 | -0.3027 |
| YRI | NPIP | 14408411 | 13.947  | 18.823  | -0.8009 |
| YRI | NPIP | 14413411 | 9.0181  | 17.3104 | -1.476  |
| YRI | NPIP | 14418411 | 7.1494  | 14.9575 | -1.598  |
| YRI | NPIP | 14423411 | 9.1816  | 13.2769 | -0.9386 |
| YRI | NPIP | 14428411 | 12.2854 | 14.4534 | -0.4584 |
| YRI | NPIP | 14433411 | 9.6076  | 13.613  | -0.8965 |
| YRI | NPIP | 14438411 | 10.7626 | 15.7978 | -0.9782 |
| YRI | NPIP | 14443411 | 10.8756 | 16.4701 | -1.0444 |
| YRI | NPIP | 14448411 | 9.2945  | 12.7727 | -0.8269 |
| YRI | NPIP | 14453411 | 13.57   | 15.1256 | -0.315  |
| YRI | NPIP | 14458411 | 14.0146 | 18.1507 | -0.7035 |
| YRI | NPIP | 14463411 | 11.6534 | 16.302  | -0.8764 |
| YRI | NPIP | 14468411 | 14.6438 | 16.6382 | -0.3687 |
| YRI | NPIP | 14473411 | 15.4322 | 15.7978 | -0.071  |
| YRI | NPIP | 14478411 | 8.4428  | 11.4282 | -0.7882 |
| YRI | NPIP | 14483411 | 6.3593  | 9.9157  | -1.0723 |
| YRI | NPIP | 14488411 | 7.1036  | 10.4199 | -0.9547 |
| YRI | NPIP | 14493411 | 7.1025  | 10.5879 | -0.9884 |
| YRI | NPIP | 14498411 | 7.2817  | 9.0754  | -0.5872 |
| YRI | NPIP | 14503411 | 5.9575  | 7.0586  | -0.4539 |
| YRI | NPIP | 14508411 | 8.3072  | 9.7476  | -0.4412 |
| YRI | NPIP | 14513411 | 7.0422  | 9.9157  | -0.8664 |
| YRI | NPIP | 14518411 | 4.9454  | 6.8906  | -0.8196 |
| YRI | NPIP | 14523411 | 5.8381  | 7.7309  | -0.7182 |
| YRI | NPIP | 14528411 | 5.3103  | 7.5628  | -0.872  |
| YRI | NPIP | 14533411 | 4.6782  | 6.7225  | -0.8809 |
| YRI | NPIP | 14538411 | 4.3294  | 7.5628  | -1.2517 |
| YRI | NPIP | 14543411 | 4.9038  | 8.067   | -1.1543 |
| YRI | NPIP | 14548411 | 3.9279  | 6.8906  | -1.2484 |
| YRI | NPIP | 14553411 | 2.7675  | 6.5544  | -1.6696 |
| YRI | NPIP | 14558411 | 2.8066  | 7.5628  | -1.8413 |
| YRI | NPIP | 14563411 | 4.4624  | 8.235   | -1.3508 |
| YRI | NPIP | 14568411 | 4.7275  | 6.5544  | -0.8054 |
| YRI | NPIP | 14573411 | 3.0407  | 6.7225  | -1.5865 |
| YRI | NPIP | 14578411 | 2.2169  | 8.235   | -2.1548 |
| YRI | NPIP | 14583411 | 1.9799  | 7.2267  | -2.1172 |
| YRI | NPIP | 14588411 | 3.1019  | 6.3864  | -1.4824 |

## 2\_TajimasD\_data

|     |      |          |        |         |         |
|-----|------|----------|--------|---------|---------|
| YRI | NPIP | 14593411 | 3.6885 | 6.7225  | -1.3074 |
| YRI | NPIP | 14598411 | 5.0635 | 6.8906  | -0.7699 |
| YRI | NPIP | 14603411 | 3.8512 | 6.3864  | -1.1442 |
| YRI | NPIP | 14608411 | 1.5861 | 7.2267  | -2.2761 |
| YRI | NPIP | 14613411 | 2.1481 | 7.7309  | -2.1183 |
| YRI | NPIP | 14618411 | 2.1398 | 6.2183  | -1.8855 |
| YRI | NPIP | 14623411 | 4.1974 | 9.0754  | -1.5968 |
| YRI | NPIP | 14628411 | 4.5687 | 9.7476  | -1.5865 |
| YRI | NPIP | 14633411 | 4.8343 | 8.235   | -1.2176 |
| YRI | NPIP | 14638411 | 4.7912 | 9.2434  | -1.4328 |
| YRI | NPIP | 14643411 | 2.9407 | 8.5712  | -1.9431 |
| YRI | NPIP | 14648411 | 3.5024 | 8.9073  | -1.8001 |
| YRI | NPIP | 14653411 | 3.8354 | 8.5712  | -1.6343 |
| YRI | NPIP | 14658411 | 3.1739 | 8.067   | -1.7855 |
| YRI | NPIP | 14663411 | 2.8388 | 8.4031  | -1.9556 |
| YRI | NPIP | 14668411 | 3.1687 | 8.4031  | -1.8397 |
| YRI | NPIP | 14673411 | 3.2677 | 8.067   | -1.7513 |
| YRI | NPIP | 14678411 | 2.7635 | 7.3947  | -1.83   |
| YRI | NPIP | 14683411 | 2.0995 | 6.3864  | -1.9348 |
| YRI | NPIP | 14688411 | 2.4792 | 7.5628  | -1.968  |
| YRI | NPIP | 14693411 | 2.8237 | 9.5795  | -2.1033 |
| YRI | NPIP | 14698411 | 3.6498 | 8.067   | -1.6119 |
| YRI | NPIP | 14703411 | 4.2562 | 9.0754  | -1.5775 |
| YRI | NPIP | 14708411 | 4.1747 | 10.2518 | -1.7762 |
| YRI | NPIP | 14713411 | 2.6465 | 6.8906  | -1.7883 |
| YRI | NPIP | 14718411 | 1.1256 | 7.8989  | -2.5198 |
| YRI | NPIP | 14723411 | 1.2375 | 7.5628  | -2.4487 |
| YRI | NPIP | 14728411 | 2.1024 | 5.8822  | -1.8366 |
| YRI | NPIP | 14733411 | 3.2034 | 7.8989  | -1.7468 |
| YRI | NPIP | 14738411 | 3.1034 | 7.0586  | -1.6305 |
| YRI | NPIP | 14743411 | 2.3156 | 5.8822  | -1.733  |
| YRI | NPIP | 14748411 | 2.3919 | 7.8989  | -2.0487 |
| YRI | NPIP | 14753411 | 2.2879 | 8.235   | -2.1294 |
| YRI | NPIP | 14758411 | 1.7167 | 6.8906  | -2.1801 |
| YRI | NPIP | 14763411 | 2.0778 | 8.235   | -2.2046 |
| YRI | NPIP | 14768411 | 2.3875 | 7.7309  | -2.0274 |
| YRI | NPIP | 14773411 | 2.6989 | 7.2267  | -1.8271 |
| YRI | NPIP | 14778411 | 3.143  | 8.5712  | -1.8733 |
| YRI | NPIP | 14783411 | 1.7065 | 4.8738  | -1.8181 |
| YRI | NPIP | 14788411 | 0.0278 | 0.5042  | -1.4972 |
| YRI | NPIP | 14793411 | 0      | 0       | 0       |
| YRI | NPIP | 14798411 | 0      | 0       | 0       |
| YRI | NPIP | 14803411 | 0      | 0       | 0       |
| YRI | NPIP | 14808411 | 0      | 0       | 0       |
| YRI | NPIP | 14813411 | 0      | 0       | 0       |
| YRI | NPIP | 14818411 | 0.1063 | 0.5042  | -1.2505 |
| YRI | NPIP | 14823411 | 0.4422 | 1.1764  | -1.3132 |
| YRI | NPIP | 14828411 | 0.3359 | 0.6722  | -0.8804 |
| YRI | NPIP | 14833411 | 0.1057 | 0.1681  | -0.3709 |

## 2\_TajimasD\_data

|     |      |          |        |         |         |
|-----|------|----------|--------|---------|---------|
| YRI | NPIP | 14838411 | 0.1057 | 0.1681  | -0.3709 |
| YRI | NPIP | 14843411 | 0      | 0       | 0       |
| YRI | NPIP | 14848411 | 0.358  | 0.3361  | 0.0879  |
| YRI | NPIP | 14853411 | 0.358  | 0.3361  | 0.0879  |
| YRI | NPIP | 14858411 | 0.2761 | 1.5126  | -1.8412 |
| YRI | NPIP | 14863411 | 2.2475 | 5.7141  | -1.7286 |
| YRI | NPIP | 14868411 | 6.3168 | 7.8989  | -0.5886 |
| YRI | NPIP | 14873411 | 4.7767 | 4.8738  | -0.0557 |
| YRI | NPIP | 14878411 | 0.8738 | 2.0167  | -1.3665 |
| YRI | NPIP | 14883411 | 0.4702 | 1.0084  | -1.073  |
| YRI | NPIP | 14888411 | 0.3258 | 1.1764  | -1.5213 |
| YRI | NPIP | 14893411 | 0.8727 | 2.8571  | -1.7946 |
| YRI | NPIP | 14898411 | 2.2977 | 5.0419  | -1.529  |
| YRI | NPIP | 14903411 | 2.6614 | 5.0419  | -1.3263 |
| YRI | NPIP | 14908411 | 2.5386 | 5.378   | -1.4943 |
| YRI | NPIP | 14913411 | 2.8532 | 5.8822  | -1.4718 |
| YRI | NPIP | 14918411 | 1.4826 | 4.5377  | -1.8668 |
| YRI | NPIP | 14923411 | 1.5492 | 5.8822  | -2.1055 |
| YRI | NPIP | 14928411 | 2.8816 | 7.5628  | -1.8122 |
| YRI | NPIP | 14933411 | 2.6018 | 5.8822  | -1.594  |
| YRI | NPIP | 14938411 | 1.4097 | 3.6974  | -1.6674 |
| YRI | NPIP | 14943411 | 1.4261 | 4.7057  | -1.9414 |
| YRI | NPIP | 14948411 | 2.3656 | 6.7225  | -1.8774 |
| YRI | NPIP | 14953411 | 1.6516 | 5.7141  | -2.0258 |
| YRI | NPIP | 14958411 | 2.6928 | 6.8906  | -1.7688 |
| YRI | NPIP | 14963411 | 5.2209 | 10.5879 | -1.5221 |
| YRI | NPIP | 14968411 | 4.6096 | 8.7392  | -1.3998 |
| YRI | NPIP | 14973411 | 2.6888 | 5.5461  | -1.4632 |
| YRI | NPIP | 14978411 | 1.713  | 5.5461  | -1.9629 |
| YRI | NPIP | 14983411 | 2.0169 | 6.3864  | -1.9721 |
| YRI | NPIP | 14988411 | 1.6143 | 5.5461  | -2.0134 |
| YRI | NPIP | 14993411 | 0.9595 | 4.5377  | -2.1864 |
| YRI | NPIP | 14998411 | 0.5983 | 2.3529  | -1.8573 |
| YRI | NPIP | 15003411 | 0.5258 | 0.6722  | -0.3833 |
| YRI | NPIP | 15008411 | 0.7435 | 1.6806  | -1.2892 |
| YRI | NPIP | 15013411 | 0.5191 | 3.0251  | -2.1618 |
| YRI | NPIP | 15018411 | 2.6625 | 5.5461  | -1.4767 |
| YRI | NPIP | 15023411 | 3.5133 | 6.0502  | -1.202  |
| YRI | NPIP | 15028411 | 1.3829 | 3.8654  | -1.7421 |
| YRI | NPIP | 15033411 | 0.4942 | 3.0251  | -2.1833 |
| YRI | NPIP | 15038411 | 0.9518 | 2.689   | -1.651  |
| YRI | NPIP | 15043411 | 2.5985 | 4.5377  | -1.1849 |
| YRI | NPIP | 15048411 | 6.6233 | 10.0837 | -1.0271 |
| YRI | NPIP | 15053411 | 8.5663 | 11.4282 | -0.7556 |
| YRI | NPIP | 15058411 | 7.6069 | 9.0754  | -0.4807 |
| YRI | NPIP | 15063411 | 4.9518 | 7.0586  | -0.8685 |
| YRI | NPIP | 15068411 | 3.2875 | 6.5544  | -1.4403 |
| YRI | NPIP | 15073411 | 5.3009 | 8.4031  | -1.0903 |
| YRI | NPIP | 15078411 | 5.3323 | 9.2434  | -1.2587 |

## 2\_TajimasD\_data

|     |      |          |        |         |         |
|-----|------|----------|--------|---------|---------|
| YRI | NPIP | 15083411 | 5.8752 | 9.7476  | -1.1863 |
| YRI | NPIP | 15088411 | 6.0857 | 9.7476  | -1.1218 |
| YRI | NPIP | 15093411 | 4.2439 | 7.8989  | -1.3597 |
| YRI | NPIP | 15098411 | 4.2828 | 7.7309  | -1.3083 |
| YRI | NPIP | 15103411 | 5.5434 | 9.0754  | -1.1562 |
| YRI | NPIP | 15108411 | 5.0886 | 9.0754  | -1.3051 |
| YRI | NPIP | 15113411 | 5.0267 | 10.0837 | -1.501  |
| YRI | NPIP | 15118411 | 6.6693 | 12.6047 | -1.4288 |
| YRI | NPIP | 15123411 | 6.2567 | 11.4282 | -1.3653 |
| YRI | NPIP | 15128411 | 8.5971 | 10.2518 | -0.4836 |
| YRI | NPIP | 15133411 | 9.3885 | 11.0921 | -0.4625 |
| YRI | NPIP | 15138411 | 7.1154 | 10.756  | -1.0174 |
| YRI | NPIP | 15143411 | 7.2291 | 9.2434  | -0.6483 |
| YRI | NPIP | 15148411 | 6.1166 | 8.4031  | -0.8036 |
| YRI | NPIP | 15153411 | 6.7193 | 10.0837 | -0.9986 |
| YRI | NPIP | 15158411 | 6.6319 | 9.2434  | -0.8405 |
| YRI | NPIP | 15163411 | 5.05   | 8.4031  | -1.1785 |
| YRI | NPIP | 15168411 | 7.3418 | 9.9157  | -0.776  |
| YRI | NPIP | 15173411 | 9.0562 | 10.2518 | -0.3494 |
| YRI | NPIP | 15178411 | 6.3055 | 8.7392  | -0.825  |
| YRI | NPIP | 15183411 | 4.857  | 8.4031  | -1.2463 |
| YRI | NPIP | 15188411 | 3.9497 | 7.2267  | -1.3223 |
| YRI | NPIP | 15193411 | 3.7103 | 8.235   | -1.6201 |
| YRI | NPIP | 15198411 | 4.5117 | 9.5795  | -1.5778 |
| YRI | NPIP | 15203411 | 4.5293 | 7.2267  | -1.0885 |
| YRI | NPIP | 15208411 | 4.1688 | 5.0419  | -0.4865 |
| YRI | NPIP | 15213411 | 2.6186 | 4.5377  | -1.1727 |
| YRI | NPIP | 15218411 | 7.069  | 11.4282 | -1.1508 |
| CEU | NPIP | 14247533 | 3.0163 | 5.2874  | -1.2212 |
| CEU | NPIP | 14252533 | 3.8897 | 7.1636  | -1.3402 |
| CEU | NPIP | 14257533 | 3.4611 | 7.1636  | -1.5156 |
| CEU | NPIP | 14262533 | 3.1701 | 7.5047  | -1.7007 |
| CEU | NPIP | 14267533 | 2.6949 | 6.3108  | -1.6601 |
| CEU | NPIP | 14272533 | 3.1709 | 7.1636  | -1.6344 |
| CEU | NPIP | 14277533 | 3.9264 | 7.5047  | -1.404  |
| CEU | NPIP | 14282533 | 2.182  | 3.9229  | -1.2142 |
| CEU | NPIP | 14287533 | 2.4321 | 4.4346  | -1.2564 |
| CEU | NPIP | 14292533 | 2.7464 | 4.2641  | -0.9852 |
| CEU | NPIP | 14297533 | 1.7939 | 3.4112  | -1.2703 |
| CEU | NPIP | 14302533 | 1.9557 | 4.7757  | -1.6586 |
| CEU | NPIP | 14307533 | 1.8802 | 4.6052  | -1.6545 |
| CEU | NPIP | 14312533 | 3.0573 | 5.6286  | -1.3079 |
| CEU | NPIP | 14317533 | 4.2004 | 8.187   | -1.4443 |
| CEU | NPIP | 14322533 | 4.8545 | 9.7221  | -1.5042 |
| CEU | NPIP | 14327533 | 3.9639 | 9.0398  | -1.6782 |
| CEU | NPIP | 14332533 | 3.7133 | 8.8692  | -1.735  |
| CEU | NPIP | 14337533 | 4.2031 | 9.5515  | -1.6803 |
| CEU | NPIP | 14342533 | 3.2266 | 7.8459  | -1.7402 |
| CEU | NPIP | 14347533 | 2.713  | 6.3108  | -1.6518 |

## 2\_TajimasD\_data

|     |      |          |         |         |         |
|-----|------|----------|---------|---------|---------|
| CEU | NPIP | 14352533 | 3.0031  | 6.4814  | -1.559  |
| CEU | NPIP | 14357533 | 3.1447  | 6.1402  | -1.4096 |
| CEU | NPIP | 14362533 | 4.2296  | 6.8225  | -1.1095 |
| CEU | NPIP | 14367533 | 5.1866  | 9.5515  | -1.3713 |
| CEU | NPIP | 14372533 | 6.5368  | 10.0632 | -1.0553 |
| CEU | NPIP | 14377533 | 9.784   | 8.3576  | 0.507   |
| CEU | NPIP | 14382533 | 8.2729  | 7.8459  | 0.1609  |
| CEU | NPIP | 14387533 | 5.6737  | 10.4043 | -1.3723 |
| CEU | NPIP | 14392533 | 9.0454  | 10.2337 | -0.3501 |
| CEU | NPIP | 14397533 | 12.9326 | 8.6987  | 1.4505  |
| CEU | NPIP | 14402533 | 12.8576 | 10.4043 | 0.7117  |
| CEU | NPIP | 14407533 | 9.7065  | 9.2104  | 0.1612  |
| CEU | NPIP | 14412533 | 8.8378  | 8.3576  | 0.1707  |
| CEU | NPIP | 14417533 | 7.813   | 7.8459  | -0.0124 |
| CEU | NPIP | 14422533 | 6.1954  | 6.4814  | -0.1282 |
| CEU | NPIP | 14427533 | 11.9942 | 8.5281  | 1.2094  |
| CEU | NPIP | 14432533 | 11.5395 | 8.0164  | 1.3013  |
| CEU | NPIP | 14437533 | 8.2286  | 5.9697  | 1.0902  |
| CEU | NPIP | 14442533 | 10.3311 | 8.3576  | 0.7015  |
| CEU | NPIP | 14447533 | 10.0169 | 9.3809  | 0.2032  |
| CEU | NPIP | 14452533 | 11.9604 | 10.0632 | 0.5678  |
| CEU | NPIP | 14457533 | 14.9913 | 11.4277 | 0.9468  |
| CEU | NPIP | 14462533 | 16.6726 | 11.9394 | 1.2068  |
| CEU | NPIP | 14467533 | 16.2653 | 14.3272 | 0.4158  |
| CEU | NPIP | 14472533 | 14.0062 | 14.6684 | -0.1389 |
| CEU | NPIP | 14477533 | 7.4583  | 9.0398  | -0.5229 |
| CEU | NPIP | 14482533 | 2.2927  | 4.2641  | -1.2797 |
| CEU | NPIP | 14487533 | 4.2092  | 5.1169  | -0.5024 |
| CEU | NPIP | 14492533 | 6.961   | 7.3342  | -0.1495 |
| CEU | NPIP | 14497533 | 6.0853  | 6.4814  | -0.1775 |
| CEU | NPIP | 14502533 | 3.3049  | 4.4346  | -0.7088 |
| CEU | NPIP | 14507533 | 4.4772  | 5.6286  | -0.5857 |
| CEU | NPIP | 14512533 | 4.1427  | 5.7991  | -0.8204 |
| CEU | NPIP | 14517533 | 1.9371  | 5.1169  | -1.7601 |
| CEU | NPIP | 14522533 | 3.3535  | 6.1402  | -1.3113 |
| CEU | NPIP | 14527533 | 3.7796  | 6.6519  | -1.2575 |
| CEU | NPIP | 14532533 | 3.1235  | 5.6286  | -1.2742 |
| CEU | NPIP | 14537533 | 4.2419  | 6.3108  | -0.9499 |
| CEU | NPIP | 14542533 | 4.5163  | 7.3342  | -1.129  |
| CEU | NPIP | 14547533 | 2.9641  | 5.458   | -1.3038 |
| CEU | NPIP | 14552533 | 1.845   | 4.0935  | -1.512  |
| CEU | NPIP | 14557533 | 2.3288  | 4.6052  | -1.3821 |
| CEU | NPIP | 14562533 | 4.0074  | 6.6519  | -1.1578 |
| CEU | NPIP | 14567533 | 2.8487  | 5.458   | -1.3641 |
| CEU | NPIP | 14572533 | 1.5341  | 5.2874  | -2.0182 |
| CEU | NPIP | 14577533 | 2.8536  | 7.1636  | -1.7643 |
| CEU | NPIP | 14582533 | 2.6143  | 5.2874  | -1.4373 |
| CEU | NPIP | 14587533 | 1.9742  | 6.1402  | -1.9604 |
| CEU | NPIP | 14592533 | 2.5613  | 7.5047  | -1.9395 |



## 2\_TajimasD\_data

|     |      |          |         |        |         |
|-----|------|----------|---------|--------|---------|
| CEU | NPIP | 14597533 | 2.7326  | 5.7991 | -1.5188 |
| CEU | NPIP | 14602533 | 2.3793  | 4.0935 | -1.1527 |
| CEU | NPIP | 14607533 | 2.2544  | 4.4346 | -1.3679 |
| CEU | NPIP | 14612533 | 2.1789  | 5.458  | -1.7142 |
| CEU | NPIP | 14617533 | 3.0878  | 4.4346 | -0.845  |
| CEU | NPIP | 14622533 | 7.5112  | 5.9697 | 0.7439  |
| CEU | NPIP | 14627533 | 9.1678  | 7.5047 | 0.6525  |
| CEU | NPIP | 14632533 | 9.3956  | 8.0164 | 0.5094  |
| CEU | NPIP | 14637533 | 10.1643 | 8.6987 | 0.5021  |
| CEU | NPIP | 14642533 | 5.7345  | 6.1402 | -0.1909 |
| CEU | NPIP | 14647533 | 3.7304  | 5.1169 | -0.7675 |
| CEU | NPIP | 14652533 | 4.8456  | 5.9697 | -0.5425 |
| CEU | NPIP | 14657533 | 4.5415  | 6.1402 | -0.7523 |
| CEU | NPIP | 14662533 | 3.5677  | 7.1636 | -1.472  |
| CEU | NPIP | 14667533 | 3.792   | 8.5281 | -1.6525 |
| CEU | NPIP | 14672533 | 4.941   | 6.3108 | -0.6289 |
| CEU | NPIP | 14677533 | 4.364   | 4.2641 | 0.0648  |
| CEU | NPIP | 14682533 | 3.9567  | 5.7991 | -0.9125 |
| CEU | NPIP | 14687533 | 2.9318  | 6.1402 | -1.5098 |
| CEU | NPIP | 14692533 | 1.8734  | 6.3108 | -2.0373 |
| CEU | NPIP | 14697533 | 4.0016  | 6.9931 | -1.2517 |
| CEU | NPIP | 14702533 | 5.066   | 6.6519 | -0.6943 |
| CEU | NPIP | 14707533 | 4.5364  | 7.1636 | -1.0754 |
| CEU | NPIP | 14712533 | 3.169   | 6.4814 | -1.4847 |
| CEU | NPIP | 14717533 | 1.0518  | 3.9229 | -2.0025 |
| CEU | NPIP | 14722533 | 0.9321  | 3.4112 | -1.9471 |
| CEU | NPIP | 14727533 | 2.1172  | 4.6052 | -1.5106 |
| CEU | NPIP | 14732533 | 2.9205  | 5.1169 | -1.2157 |
| CEU | NPIP | 14737533 | 3.8258  | 5.1169 | -0.7146 |
| CEU | NPIP | 14742533 | 2.5539  | 4.6052 | -1.2454 |
| CEU | NPIP | 14747533 | 1.274   | 4.2641 | -1.941  |
| CEU | NPIP | 14752533 | 2.9951  | 4.7757 | -1.0472 |
| CEU | NPIP | 14757533 | 3.2088  | 5.458  | -1.1758 |
| CEU | NPIP | 14762533 | 2.3913  | 6.3108 | -1.7995 |
| CEU | NPIP | 14767533 | 1.6386  | 4.9463 | -1.8864 |
| CEU | NPIP | 14772533 | 2.8613  | 4.0935 | -0.8286 |
| CEU | NPIP | 14777533 | 4.3187  | 6.3108 | -0.9146 |
| CEU | NPIP | 14782533 | 2.1222  | 4.2641 | -1.3904 |
| CEU | NPIP | 14787533 | 0.0602  | 0.3411 | -1.126  |
| CEU | NPIP | 14792533 | 0.0101  | 0.1706 | -0.9534 |
| CEU | NPIP | 14797533 | 0.0101  | 0.1706 | -0.9534 |
| CEU | NPIP | 14802533 | 0       | 0      | 0       |
| CEU | NPIP | 14807533 | 0       | 0      | 0       |
| CEU | NPIP | 14812533 | 0       | 0      | 0       |
| CEU | NPIP | 14817533 | 0.1309  | 0.1706 | -0.2358 |
| CEU | NPIP | 14822533 | 0.5803  | 1.0234 | -0.8805 |
| CEU | NPIP | 14827533 | 0.4494  | 0.8528 | -0.9084 |
| CEU | NPIP | 14832533 | 0.095   | 0.1706 | -0.4491 |
| CEU | NPIP | 14837533 | 0.095   | 0.1706 | -0.4491 |

## 2\_TajimasD\_data

|     |      |          |        |        |         |
|-----|------|----------|--------|--------|---------|
| CEU | NPIP | 14842533 | 0.0202 | 0.1706 | -0.8934 |
| CEU | NPIP | 14847533 | 0.1441 | 0.3411 | -0.7897 |
| CEU | NPIP | 14852533 | 0.1239 | 0.1706 | -0.2774 |
| CEU | NPIP | 14857533 | 0.873  | 0.6822 | 0.4982  |
| CEU | NPIP | 14862533 | 2.772  | 4.2641 | -0.9686 |
| CEU | NPIP | 14867533 | 5.6197 | 7.1636 | -0.632  |
| CEU | NPIP | 14872533 | 4.1101 | 4.6052 | -0.3006 |
| CEU | NPIP | 14877533 | 0.986  | 2.0467 | -1.2621 |
| CEU | NPIP | 14882533 | 1.0423 | 1.1939 | -0.2702 |
| CEU | NPIP | 14887533 | 0.8854 | 0.5117 | 1.172   |
| CEU | NPIP | 14892533 | 0.7318 | 1.7056 | -1.3337 |
| CEU | NPIP | 14897533 | 1.4985 | 3.4112 | -1.5023 |
| CEU | NPIP | 14902533 | 1.7772 | 3.5818 | -1.3601 |
| CEU | NPIP | 14907533 | 0.9229 | 2.8996 | -1.7777 |
| CEU | NPIP | 14912533 | 1.8617 | 3.5818 | -1.2964 |
| CEU | NPIP | 14917533 | 1.3882 | 2.729  | -1.2673 |
| CEU | NPIP | 14922533 | 0.9147 | 1.8762 | -1.2242 |
| CEU | NPIP | 14927533 | 1.9079 | 2.8996 | -0.8919 |
| CEU | NPIP | 14932533 | 1.8592 | 2.8996 | -0.9357 |
| CEU | NPIP | 14937533 | 1.7578 | 2.729  | -0.918  |
| CEU | NPIP | 14942533 | 1.683  | 3.0701 | -1.1898 |
| CEU | NPIP | 14947533 | 1.7128 | 2.8996 | -1.0673 |
| CEU | NPIP | 14952533 | 1.5673 | 3.0701 | -1.2891 |
| CEU | NPIP | 14957533 | 2.2956 | 4.6052 | -1.4023 |
| CEU | NPIP | 14962533 | 2.9223 | 4.2641 | -0.871  |
| CEU | NPIP | 14967533 | 4.9305 | 4.9463 | -0.009  |
| CEU | NPIP | 14972533 | 4.0952 | 4.4346 | -0.213  |
| CEU | NPIP | 14977533 | 0.6178 | 2.5584 | -1.9332 |
| CEU | NPIP | 14982533 | 1.402  | 3.9229 | -1.7583 |
| CEU | NPIP | 14987533 | 1.408  | 4.0935 | -1.8058 |
| CEU | NPIP | 14992533 | 0.6157 | 3.2407 | -2.1524 |
| CEU | NPIP | 14997533 | 0.4651 | 1.8762 | -1.7966 |
| CEU | NPIP | 15002533 | 0.4599 | 0.8528 | -0.8848 |
| CEU | NPIP | 15007533 | 0.3537 | 0.6822 | -0.8578 |
| CEU | NPIP | 15012533 | 0.0604 | 0.8528 | -1.7845 |
| CEU | NPIP | 15017533 | 1.3729 | 1.5351 | -0.2405 |
| CEU | NPIP | 15022533 | 2.4086 | 2.5584 | -0.1492 |
| CEU | NPIP | 15027533 | 1.6106 | 2.3879 | -0.8186 |
| CEU | NPIP | 15032533 | 1.0049 | 2.0467 | -1.2396 |
| CEU | NPIP | 15037533 | 0.9091 | 1.7056 | -1.0909 |
| CEU | NPIP | 15042533 | 1.1888 | 2.2173 | -1.149  |
| CEU | NPIP | 15047533 | 3.4051 | 5.2874 | -1.0121 |
| CEU | NPIP | 15052533 | 6.5271 | 7.5047 | -0.3836 |
| CEU | NPIP | 15057533 | 7.5869 | 8.8692 | -0.4315 |
| CEU | NPIP | 15062533 | 5.247  | 7.6753 | -0.9334 |
| CEU | NPIP | 15067533 | 3.396  | 5.6286 | -1.1356 |
| CEU | NPIP | 15072533 | 4.1593 | 5.2874 | -0.6066 |
| CEU | NPIP | 15077533 | 5.5358 | 6.4814 | -0.4238 |
| CEU | NPIP | 15082533 | 7.2997 | 9.2104 | -0.6209 |

## 2\_TajimasD\_data

|     |      |          |         |         |         |
|-----|------|----------|---------|---------|---------|
| CEU | NPIP | 15087533 | 6.3269  | 7.5047  | -0.4621 |
| CEU | NPIP | 15092533 | 4.5467  | 6.4814  | -0.8672 |
| CEU | NPIP | 15097533 | 4.5887  | 7.3342  | -1.1    |
| CEU | NPIP | 15102533 | 4.1266  | 6.6519  | -1.1056 |
| CEU | NPIP | 15107533 | 4.6226  | 6.6519  | -0.8885 |
| CEU | NPIP | 15112533 | 5.0841  | 6.6519  | -0.6864 |
| CEU | NPIP | 15117533 | 6.4061  | 7.3342  | -0.3719 |
| CEU | NPIP | 15122533 | 6.2865  | 7.3342  | -0.4198 |
| CEU | NPIP | 15127533 | 10.2105 | 9.3809  | 0.265   |
| CEU | NPIP | 15132533 | 13.1641 | 11.0866 | 0.5679  |
| CEU | NPIP | 15137533 | 9.631   | 8.8692  | 0.2563  |
| CEU | NPIP | 15142533 | 8.6063  | 7.3342  | 0.5097  |
| CEU | NPIP | 15147533 | 8.1431  | 6.6519  | 0.6529  |
| CEU | NPIP | 15152533 | 7.0963  | 7.1636  | -0.0275 |
| CEU | NPIP | 15157533 | 6.3562  | 6.9931  | -0.2665 |
| CEU | NPIP | 15162533 | 5.4263  | 5.458   | -0.0166 |
| CEU | NPIP | 15167533 | 6.5236  | 6.8225  | -0.1279 |
| CEU | NPIP | 15172533 | 8.0614  | 8.0164  | 0.0166  |
| CEU | NPIP | 15177533 | 7.4914  | 7.3342  | 0.063   |
| CEU | NPIP | 15182533 | 5.7642  | 7.3342  | -0.6291 |
| CEU | NPIP | 15187533 | 3.6207  | 6.4814  | -1.2822 |
| CEU | NPIP | 15192533 | 2.7726  | 5.7991  | -1.499  |
| CEU | NPIP | 15197533 | 4.5382  | 6.6519  | -0.9254 |
| CEU | NPIP | 15202533 | 5.6174  | 7.1636  | -0.6329 |
| CEU | NPIP | 15207533 | 3.1503  | 4.6052  | -0.8833 |
| CEU | NPIP | 15212533 | 1.6347  | 2.2173  | -0.6509 |
| CEU | NPIP | 15217533 | 3.7462  | 6.8225  | -1.3163 |
| CEU | NPIP | 15222533 | 6.4401  | 11.9394 | -1.4021 |
| CEU | NPIP | 15227533 | 6.2635  | 10.2337 | -1.1696 |
| CEU | NPIP | 15232533 | 4.4921  | 7.6753  | -1.2235 |
| CEU | NPIP | 15237533 | 2.511   | 7.1636  | -1.9045 |
| CEU | NPIP | 15242533 | 2.4094  | 4.9463  | -1.4468 |
| CEU | NPIP | 15247533 | 3.6319  | 4.6052  | -0.5909 |
| CEU | NPIP | 15252533 | 4.3081  | 7.1636  | -1.1689 |
| CEU | NPIP | 15257533 | 2.8011  | 5.9697  | -1.5292 |
| CHB | NPIP | 14247533 | 7.1163  | 6.946   | 0.0715  |
| CHB | NPIP | 14252533 | 8.5321  | 8.979   | -0.1483 |
| CHB | NPIP | 14257533 | 6.2581  | 7.6237  | -0.5266 |
| CHB | NPIP | 14262533 | 5.5911  | 7.6237  | -0.7838 |
| CHB | NPIP | 14267533 | 4.0048  | 7.2848  | -1.3185 |
| CHB | NPIP | 14272533 | 3.5496  | 8.3013  | -1.6947 |
| CHB | NPIP | 14277533 | 4.0662  | 8.979   | -1.6297 |
| CHB | NPIP | 14282533 | 2.6752  | 6.7766  | -1.7606 |
| CHB | NPIP | 14287533 | 2.8865  | 7.2848  | -1.768  |
| CHB | NPIP | 14292533 | 2.8058  | 5.9295  | -1.5122 |
| CHB | NPIP | 14297533 | 2.62    | 5.5907  | -1.5157 |
| CHB | NPIP | 14302533 | 3.5161  | 7.6237  | -1.584  |
| CHB | NPIP | 14307533 | 3.2511  | 5.9295  | -1.2967 |
| CHB | NPIP | 14312533 | 4.1235  | 5.9295  | -0.8743 |

## 2\_TajimasD\_data

|     |      |          |         |         |         |
|-----|------|----------|---------|---------|---------|
| CHB | NPIP | 14317533 | 5.6453  | 10.3343 | -1.3649 |
| CHB | NPIP | 14322533 | 6.6866  | 12.5367 | -1.4203 |
| CHB | NPIP | 14327533 | 4.6     | 10.8426 | -1.7373 |
| CHB | NPIP | 14332533 | 3.5172  | 10.5037 | -2.003  |
| CHB | NPIP | 14337533 | 4.9317  | 10.5037 | -1.5975 |
| CHB | NPIP | 14342533 | 4.625   | 8.979   | -1.4444 |
| CHB | NPIP | 14347533 | 3.7708  | 7.9625  | -1.5533 |
| CHB | NPIP | 14352533 | 5.051   | 7.2848  | -0.8979 |
| CHB | NPIP | 14357533 | 6.043   | 5.9295  | 0.0549  |
| CHB | NPIP | 14362533 | 7.3689  | 6.7766  | 0.2543  |
| CHB | NPIP | 14367533 | 8.4784  | 9.3178  | -0.2691 |
| CHB | NPIP | 14372533 | 9.0011  | 10.8426 | -0.5125 |
| CHB | NPIP | 14377533 | 10.9937 | 9.9955  | 0.2997  |
| CHB | NPIP | 14382533 | 7.9596  | 7.7931  | 0.0629  |
| CHB | NPIP | 14387533 | 4.83    | 7.4543  | -1.033  |
| CHB | NPIP | 14392533 | 9.2318  | 8.1319  | 0.3998  |
| CHB | NPIP | 14397533 | 11.9629 | 8.979   | 0.9899  |
| CHB | NPIP | 14402533 | 10.9573 | 12.5367 | -0.3835 |
| CHB | NPIP | 14407533 | 10.1917 | 11.6896 | -0.3885 |
| CHB | NPIP | 14412533 | 10.0765 | 9.6567  | 0.1302  |
| CHB | NPIP | 14417533 | 8.2566  | 9.8261  | -0.4789 |
| CHB | NPIP | 14422533 | 6.1376  | 8.3013  | -0.7717 |
| CHB | NPIP | 14427533 | 12.0208 | 8.6402  | 1.162   |
| CHB | NPIP | 14432533 | 11.6766 | 7.4543  | 1.662   |
| CHB | NPIP | 14437533 | 8.5222  | 8.4708  | 0.018   |
| CHB | NPIP | 14442533 | 10.6688 | 10.3343 | 0.0974  |
| CHB | NPIP | 14447533 | 10.1249 | 9.1484  | 0.3184  |
| CHB | NPIP | 14452533 | 12.1053 | 9.3178  | 0.8935  |
| CHB | NPIP | 14457533 | 14.0051 | 11.012  | 0.821   |
| CHB | NPIP | 14462533 | 14.2271 | 14.4003 | -0.0369 |
| CHB | NPIP | 14467533 | 13.667  | 15.4168 | -0.3491 |
| CHB | NPIP | 14472533 | 11.6103 | 12.5367 | -0.2249 |
| CHB | NPIP | 14477533 | 6.4043  | 8.1319  | -0.6279 |
| CHB | NPIP | 14482533 | 1.7839  | 4.913   | -1.7898 |
| CHB | NPIP | 14487533 | 2.6168  | 5.2519  | -1.4212 |
| CHB | NPIP | 14492533 | 4.1321  | 7.4543  | -1.3077 |
| CHB | NPIP | 14497533 | 3.4702  | 7.2848  | -1.5333 |
| CHB | NPIP | 14502533 | 2.455   | 5.0825  | -1.4587 |
| CHB | NPIP | 14507533 | 3.9335  | 5.4213  | -0.7802 |
| CHB | NPIP | 14512533 | 3.8699  | 6.2684  | -1.1047 |
| CHB | NPIP | 14517533 | 1.4485  | 6.2684  | -2.2199 |
| CHB | NPIP | 14522533 | 0.8389  | 6.7766  | -2.5488 |
| CHB | NPIP | 14527533 | 1.5372  | 6.2684  | -2.179  |
| CHB | NPIP | 14532533 | 3.1864  | 4.913   | -0.9876 |
| CHB | NPIP | 14537533 | 4.9869  | 5.5907  | -0.3081 |
| CHB | NPIP | 14542533 | 5.984   | 7.2848  | -0.5229 |
| CHB | NPIP | 14547533 | 4.4569  | 6.946   | -1.0448 |
| CHB | NPIP | 14552533 | 2.2913  | 5.0825  | -1.5496 |
| CHB | NPIP | 14557533 | 2.0356  | 4.4048  | -1.4908 |

## 2\_TajimasD\_data

|     |      |          |        |        |         |
|-----|------|----------|--------|--------|---------|
| CHB | NPIP | 14562533 | 2.2559 | 4.7436 | -1.4674 |
| CHB | NPIP | 14567533 | 1.9483 | 5.5907 | -1.8584 |
| CHB | NPIP | 14572533 | 1.623  | 5.4213 | -1.9917 |
| CHB | NPIP | 14577533 | 1.8369 | 5.5907 | -1.9153 |
| CHB | NPIP | 14582533 | 1.2656 | 5.5907 | -2.2068 |
| CHB | NPIP | 14587533 | 1.0529 | 5.7601 | -2.3386 |
| CHB | NPIP | 14592533 | 1.3668 | 6.4378 | -2.2801 |
| CHB | NPIP | 14597533 | 1.1805 | 5.5907 | -2.2502 |
| CHB | NPIP | 14602533 | 0.997  | 4.913  | -2.2399 |
| CHB | NPIP | 14607533 | 0.5827 | 4.4048 | -2.4051 |
| CHB | NPIP | 14612533 | 0.6539 | 4.2354 | -2.3316 |
| CHB | NPIP | 14617533 | 1.0531 | 4.4048 | -2.1091 |
| CHB | NPIP | 14622533 | 1.6551 | 7.9625 | -2.3373 |
| CHB | NPIP | 14627533 | 2.1255 | 9.9955 | -2.3632 |
| CHB | NPIP | 14632533 | 3.57   | 8.4708 | -1.7156 |
| CHB | NPIP | 14637533 | 3.5865 | 7.1154 | -1.4492 |
| CHB | NPIP | 14642533 | 1.8117 | 6.2684 | -2.0526 |
| CHB | NPIP | 14647533 | 1.5614 | 7.4543 | -2.3196 |
| CHB | NPIP | 14652533 | 1.5494 | 8.1319 | -2.3926 |
| CHB | NPIP | 14657533 | 2.0548 | 7.6237 | -2.1475 |
| CHB | NPIP | 14662533 | 1.7556 | 6.6072 | -2.1309 |
| CHB | NPIP | 14667533 | 2.1525 | 6.946  | -2.0121 |
| CHB | NPIP | 14672533 | 2.1136 | 6.7766 | -2.0017 |
| CHB | NPIP | 14677533 | 1.3263 | 5.0825 | -2.0854 |
| CHB | NPIP | 14682533 | 2.1591 | 4.7436 | -1.5245 |
| CHB | NPIP | 14687533 | 2.3489 | 7.7931 | -2.0576 |
| CHB | NPIP | 14692533 | 1.771  | 9.1484 | -2.4053 |
| CHB | NPIP | 14697533 | 3.0769 | 6.6072 | -1.5505 |
| CHB | NPIP | 14702533 | 4.0131 | 6.4378 | -1.0902 |
| CHB | NPIP | 14707533 | 3.5028 | 7.7931 | -1.6215 |
| CHB | NPIP | 14712533 | 2.317  | 6.946  | -1.9431 |
| CHB | NPIP | 14717533 | 0.7196 | 4.5742 | -2.3471 |
| CHB | NPIP | 14722533 | 0.7582 | 3.7271 | -2.1568 |
| CHB | NPIP | 14727533 | 1.352  | 3.8965 | -1.7797 |
| CHB | NPIP | 14732533 | 1.814  | 4.066  | -1.5186 |
| CHB | NPIP | 14737533 | 3.0057 | 4.913  | -1.091  |
| CHB | NPIP | 14742533 | 2.668  | 5.5907 | -1.4912 |
| CHB | NPIP | 14747533 | 1.9665 | 5.9295 | -1.9185 |
| CHB | NPIP | 14752533 | 2.2638 | 5.5907 | -1.6975 |
| CHB | NPIP | 14757533 | 1.8283 | 6.2684 | -2.045  |
| CHB | NPIP | 14762533 | 1.3973 | 5.7601 | -2.1675 |
| CHB | NPIP | 14767533 | 1.13   | 4.5742 | -2.0972 |
| CHB | NPIP | 14772533 | 2.5418 | 5.0825 | -1.4105 |
| CHB | NPIP | 14777533 | 3.8348 | 7.1154 | -1.3472 |
| CHB | NPIP | 14782533 | 2.2501 | 5.2519 | -1.619  |
| CHB | NPIP | 14787533 | 0.2915 | 0.6777 | -1.0096 |
| CHB | NPIP | 14792533 | 0.0478 | 0.1694 | -0.7226 |
| CHB | NPIP | 14797533 | 0      | 0      | 0       |
| CHB | NPIP | 14802533 | 0      | 0      | 0       |

## 2\_TajimasD\_data

|     |      |          |        |        |         |
|-----|------|----------|--------|--------|---------|
| CHB | NPIP | 14807533 | 0      | 0      | 0       |
| CHB | NPIP | 14812533 | 0      | 0      | 0       |
| CHB | NPIP | 14817533 | 0.0194 | 0.3388 | -1.2812 |
| CHB | NPIP | 14822533 | 0.5168 | 1.0165 | -0.9944 |
| CHB | NPIP | 14827533 | 0.4974 | 0.6777 | -0.4714 |
| CHB | NPIP | 14832533 | 0.0377 | 0.1694 | -0.7826 |
| CHB | NPIP | 14837533 | 0.0377 | 0.1694 | -0.7826 |
| CHB | NPIP | 14842533 | 0      | 0      | 0       |
| CHB | NPIP | 14847533 | 0.2142 | 0.1694 | 0.2662  |
| CHB | NPIP | 14852533 | 0.2142 | 0.1694 | 0.2662  |
| CHB | NPIP | 14857533 | 1.3556 | 0.6777 | 1.7722  |
| CHB | NPIP | 14862533 | 3.1196 | 3.7271 | -0.4413 |
| CHB | NPIP | 14867533 | 6.2349 | 6.6072 | -0.1635 |
| CHB | NPIP | 14872533 | 5.4278 | 4.4048 | 0.6437  |
| CHB | NPIP | 14877533 | 1.5342 | 1.5247 | 0.0141  |
| CHB | NPIP | 14882533 | 0.7377 | 1.0165 | -0.5548 |
| CHB | NPIP | 14887533 | 0.1989 | 0.6777 | -1.2517 |
| CHB | NPIP | 14892533 | 0.3337 | 1.6942 | -1.8671 |
| CHB | NPIP | 14897533 | 1.992  | 2.7106 | -0.6809 |
| CHB | NPIP | 14902533 | 1.9406 | 2.033  | -0.1102 |
| CHB | NPIP | 14907533 | 0.5231 | 1.3553 | -1.3487 |
| CHB | NPIP | 14912533 | 2.4626 | 1.8636 | 0.7642  |
| CHB | NPIP | 14917533 | 1.8161 | 1.8636 | -0.0606 |
| CHB | NPIP | 14922533 | 0.7472 | 2.033  | -1.5333 |
| CHB | NPIP | 14927533 | 1.3678 | 2.7106 | -1.2724 |
| CHB | NPIP | 14932533 | 1.7491 | 2.8801 | -1.0197 |
| CHB | NPIP | 14937533 | 1.5945 | 2.8801 | -1.1591 |
| CHB | NPIP | 14942533 | 1.5212 | 2.7106 | -1.127  |
| CHB | NPIP | 14947533 | 2.1978 | 2.8801 | -0.6152 |
| CHB | NPIP | 14952533 | 1.3069 | 2.8801 | -1.4184 |
| CHB | NPIP | 14957533 | 1.3647 | 3.3883 | -1.5936 |
| CHB | NPIP | 14962533 | 2.4359 | 3.8965 | -1.0216 |
| CHB | NPIP | 14967533 | 5.6341 | 4.913  | 0.4125  |
| CHB | NPIP | 14972533 | 5.2599 | 6.4378 | -0.5296 |
| CHB | NPIP | 14977533 | 1.1947 | 4.7436 | -2.0934 |
| CHB | NPIP | 14982533 | 2.4493 | 3.2189 | -0.6327 |
| CHB | NPIP | 14987533 | 2.1729 | 3.2189 | -0.86   |
| CHB | NPIP | 14992533 | 0.6777 | 2.2024 | -1.7073 |
| CHB | NPIP | 14997533 | 0.6908 | 1.5247 | -1.2389 |
| CHB | NPIP | 15002533 | 0.941  | 1.3553 | -0.6715 |
| CHB | NPIP | 15007533 | 0.7839 | 0.5082 | 0.8655  |
| CHB | NPIP | 15012533 | 0.048  | 0.5082 | -1.4446 |
| CHB | NPIP | 15017533 | 1.525  | 1.6942 | -0.2322 |
| CHB | NPIP | 15022533 | 3.0046 | 3.3883 | -0.3022 |
| CHB | NPIP | 15027533 | 1.9018 | 3.2189 | -1.0828 |
| CHB | NPIP | 15032533 | 0.4892 | 1.6942 | -1.6537 |
| CHB | NPIP | 15037533 | 0.5711 | 1.0165 | -0.8864 |
| CHB | NPIP | 15042533 | 1.9505 | 2.2024 | -0.2821 |
| CHB | NPIP | 15047533 | 4.4773 | 5.2519 | -0.4178 |

## 2\_TajimasD\_data

|     |      |          |         |         |         |
|-----|------|----------|---------|---------|---------|
| CHB | NPIP | 15052533 | 6.28    | 7.4543  | -0.4622 |
| CHB | NPIP | 15057533 | 8.0425  | 8.3013  | -0.0923 |
| CHB | NPIP | 15062533 | 6.3657  | 7.4543  | -0.4285 |
| CHB | NPIP | 15067533 | 3.4908  | 5.2519  | -0.9498 |
| CHB | NPIP | 15072533 | 4.5298  | 4.7436  | -0.1261 |
| CHB | NPIP | 15077533 | 5.5932  | 6.0989  | -0.2387 |
| CHB | NPIP | 15082533 | 6.4036  | 6.6072  | -0.0894 |
| CHB | NPIP | 15087533 | 5.9461  | 6.0989  | -0.0721 |
| CHB | NPIP | 15092533 | 4.64    | 6.4378  | -0.8083 |
| CHB | NPIP | 15097533 | 4.8766  | 7.4543  | -1.0147 |
| CHB | NPIP | 15102533 | 4.205   | 6.6072  | -1.0551 |
| CHB | NPIP | 15107533 | 4.6766  | 6.0989  | -0.6714 |
| CHB | NPIP | 15112533 | 5.7653  | 6.0989  | -0.1575 |
| CHB | NPIP | 15117533 | 5.8812  | 5.0825  | 0.4434  |
| CHB | NPIP | 15122533 | 5.3385  | 4.7436  | 0.3509  |
| CHB | NPIP | 15127533 | 11.1603 | 8.1319  | 1.1007  |
| CHB | NPIP | 15132533 | 14.8509 | 10.8426 | 1.1155  |
| CHB | NPIP | 15137533 | 10.9377 | 8.979   | 0.6498  |
| CHB | NPIP | 15142533 | 9.5494  | 6.946   | 1.0928  |
| CHB | NPIP | 15147533 | 8.1725  | 5.9295  | 1.0859  |
| CHB | NPIP | 15152533 | 8.2336  | 7.4543  | 0.3068  |
| CHB | NPIP | 15157533 | 8.2867  | 7.1154  | 0.481   |
| CHB | NPIP | 15162533 | 6.3286  | 5.7601  | 0.2824  |
| CHB | NPIP | 15167533 | 6.9063  | 6.7766  | 0.0557  |
| CHB | NPIP | 15172533 | 8.3194  | 7.6237  | 0.2683  |
| CHB | NPIP | 15177533 | 8.7773  | 7.1154  | 0.6825  |
| CHB | NPIP | 15182533 | 6.9772  | 6.2684  | 0.3264  |
| CHB | NPIP | 15187533 | 3.985   | 5.4213  | -0.7532 |
| CHB | NPIP | 15192533 | 3.4654  | 5.0825  | -0.8978 |
| CHB | NPIP | 15197533 | 4.8924  | 6.2684  | -0.6337 |
| CHB | NPIP | 15202533 | 5.8378  | 5.9295  | -0.0444 |
| CHB | NPIP | 15207533 | 3.5772  | 3.2189  | 0.2946  |
| CHB | NPIP | 15212533 | 2.1793  | 2.2024  | -0.0259 |
| CHB | NPIP | 15217533 | 5.9899  | 6.6072  | -0.2711 |
| CHB | NPIP | 15222533 | 10.3606 | 11.6896 | -0.3447 |
| CHB | NPIP | 15227533 | 8.3463  | 8.979   | -0.2099 |
| CHB | NPIP | 15232533 | 4.9764  | 6.2684  | -0.595  |
| CHB | NPIP | 15237533 | 3.1064  | 7.2848  | -1.6796 |
| CHB | NPIP | 15242533 | 2.8947  | 6.7766  | -1.6664 |
| CHB | NPIP | 15247533 | 5.6115  | 7.2848  | -0.6726 |
| CHB | NPIP | 15252533 | 5.5608  | 7.1154  | -0.6384 |
| CHB | NPIP | 15257533 | 2.6745  | 4.913   | -1.2804 |
| YRI | NPIP | 14247533 | 12.4338 | 11.5963 | 0.2181  |
| YRI | NPIP | 14252533 | 15.3592 | 13.7811 | 0.3491  |
| YRI | NPIP | 14257533 | 12.9555 | 14.6214 | -0.3484 |
| YRI | NPIP | 14262533 | 10.9129 | 12.2685 | -0.3348 |
| YRI | NPIP | 14267533 | 9.5075  | 10.4199 | -0.2627 |
| YRI | NPIP | 14272533 | 10.8494 | 11.4282 | -0.1528 |
| YRI | NPIP | 14277533 | 12.0611 | 10.756  | 0.3647  |

## 2\_TajimasD\_data

|     |      |          |         |         |         |
|-----|------|----------|---------|---------|---------|
| YRI | NPIP | 14282533 | 8.5099  | 9.2434  | -0.2361 |
| YRI | NPIP | 14287533 | 7.5064  | 10.4199 | -0.8387 |
| YRI | NPIP | 14292533 | 5.8171  | 9.2434  | -1.1027 |
| YRI | NPIP | 14297533 | 5.5448  | 8.5712  | -1.0444 |
| YRI | NPIP | 14302533 | 6.9672  | 8.9073  | -0.6462 |
| YRI | NPIP | 14307533 | 5.3422  | 8.7392  | -1.1515 |
| YRI | NPIP | 14312533 | 5.7864  | 9.5795  | -1.1809 |
| YRI | NPIP | 14317533 | 11.6211 | 14.1172 | -0.5397 |
| YRI | NPIP | 14322533 | 16.1425 | 16.9743 | -0.1509 |
| YRI | NPIP | 14327533 | 15.4567 | 14.9575 | 0.1022  |
| YRI | NPIP | 14332533 | 15.6286 | 14.2853 | 0.2872  |
| YRI | NPIP | 14337533 | 14.2699 | 14.6214 | -0.0735 |
| YRI | NPIP | 14342533 | 10.8187 | 16.4701 | -1.055  |
| YRI | NPIP | 14347533 | 10.0727 | 16.8062 | -1.233  |
| YRI | NPIP | 14352533 | 10.0003 | 13.9492 | -0.8636 |
| YRI | NPIP | 14357533 | 9.1388  | 12.6047 | -0.8343 |
| YRI | NPIP | 14362533 | 10.9463 | 12.6047 | -0.3992 |
| YRI | NPIP | 14367533 | 14.7623 | 14.1172 | 0.1395  |
| YRI | NPIP | 14372533 | 16.8983 | 16.8062 | 0.0169  |
| YRI | NPIP | 14377533 | 15.1178 | 15.6298 | -0.1005 |
| YRI | NPIP | 14382533 | 11.6494 | 14.4534 | -0.5929 |
| YRI | NPIP | 14387533 | 12.5396 | 17.9827 | -0.9341 |
| YRI | NPIP | 14392533 | 13.5118 | 16.6382 | -0.578  |
| YRI | NPIP | 14397533 | 14.3911 | 13.9492 | 0.0966  |
| YRI | NPIP | 14402533 | 17.2526 | 17.9827 | -0.1253 |
| YRI | NPIP | 14407533 | 13.9814 | 19.1591 | -0.8361 |
| YRI | NPIP | 14412533 | 9.4271  | 16.4701 | -1.3148 |
| YRI | NPIP | 14417533 | 6.8313  | 13.613  | -1.5179 |
| YRI | NPIP | 14422533 | 6.6071  | 13.613  | -1.5681 |
| YRI | NPIP | 14427533 | 12.5229 | 15.7978 | -0.6362 |
| YRI | NPIP | 14432533 | 11.7795 | 13.613  | -0.4104 |
| YRI | NPIP | 14437533 | 9.6192  | 14.7895 | -1.0696 |
| YRI | NPIP | 14442533 | 11.6581 | 16.302  | -0.8755 |
| YRI | NPIP | 14447533 | 10.4906 | 13.9492 | -0.7564 |
| YRI | NPIP | 14452533 | 11.3101 | 13.9492 | -0.5772 |
| YRI | NPIP | 14457533 | 12.4155 | 16.8062 | -0.804  |
| YRI | NPIP | 14462533 | 14.0702 | 18.991  | -0.8013 |
| YRI | NPIP | 14467533 | 16.4907 | 17.8146 | -0.2293 |
| YRI | NPIP | 14472533 | 15.4505 | 15.7978 | -0.0675 |
| YRI | NPIP | 14477533 | 8.6948  | 11.2602 | -0.6868 |
| YRI | NPIP | 14482533 | 4.947   | 8.9073  | -1.319  |
| YRI | NPIP | 14487533 | 6.9784  | 9.5795  | -0.8098 |
| YRI | NPIP | 14492533 | 8.4234  | 11.0921 | -0.7246 |
| YRI | NPIP | 14497533 | 7.4136  | 10.924  | -0.9668 |
| YRI | NPIP | 14502533 | 4.587   | 6.5544  | -0.8674 |
| YRI | NPIP | 14507533 | 7.5169  | 8.4031  | -0.3115 |
| YRI | NPIP | 14512533 | 7.58    | 10.2518 | -0.7809 |
| YRI | NPIP | 14517533 | 5.5055  | 8.067   | -0.9347 |
| YRI | NPIP | 14522533 | 6.291   | 7.7309  | -0.5463 |



## 2\_TajimasD\_data

|     |      |          |        |        |         |
|-----|------|----------|--------|--------|---------|
| YRI | NPIP | 14527533 | 5.3525 | 7.7309 | -0.9024 |
| YRI | NPIP | 14532533 | 4.6594 | 7.2267 | -1.036  |
| YRI | NPIP | 14537533 | 4.6902 | 7.3947 | -1.0687 |
| YRI | NPIP | 14542533 | 5.1242 | 8.235  | -1.1138 |
| YRI | NPIP | 14547533 | 3.6449 | 6.5544 | -1.2827 |
| YRI | NPIP | 14552533 | 2.1481 | 5.2099 | -1.6573 |
| YRI | NPIP | 14557533 | 3.1315 | 7.3947 | -1.6846 |
| YRI | NPIP | 14562533 | 5.1993 | 9.0754 | -1.2688 |
| YRI | NPIP | 14567533 | 4.1303 | 6.7225 | -1.117  |
| YRI | NPIP | 14572533 | 2.9155 | 6.3864 | -1.5665 |
| YRI | NPIP | 14577533 | 2.7615 | 8.067  | -1.936  |
| YRI | NPIP | 14582533 | 1.9688 | 7.7309 | -2.1863 |
| YRI | NPIP | 14587533 | 3.228  | 7.0586 | -1.5792 |
| YRI | NPIP | 14592533 | 3.9054 | 6.8906 | -1.2579 |
| YRI | NPIP | 14597533 | 4.5961 | 6.5544 | -0.8634 |
| YRI | NPIP | 14602533 | 3.7857 | 6.0502 | -1.0729 |
| YRI | NPIP | 14607533 | 1.9432 | 6.5544 | -2.033  |
| YRI | NPIP | 14612533 | 2.0072 | 7.2267 | -2.1062 |
| YRI | NPIP | 14617533 | 2.268  | 7.2267 | -2.0009 |
| YRI | NPIP | 14622533 | 3.8906 | 8.9073 | -1.6709 |
| YRI | NPIP | 14627533 | 4.4347 | 9.4115 | -1.5751 |
| YRI | NPIP | 14632533 | 5.1961 | 8.7392 | -1.201  |
| YRI | NPIP | 14637533 | 4.6907 | 8.7392 | -1.3723 |
| YRI | NPIP | 14642533 | 2.765  | 8.4031 | -1.9816 |
| YRI | NPIP | 14647533 | 3.3339 | 8.7392 | -1.8323 |
| YRI | NPIP | 14652533 | 3.4437 | 7.8989 | -1.6574 |
| YRI | NPIP | 14657533 | 3.3966 | 8.4031 | -1.7596 |
| YRI | NPIP | 14662533 | 3.5648 | 9.4115 | -1.8504 |
| YRI | NPIP | 14667533 | 3.3583 | 9.2434 | -1.894  |
| YRI | NPIP | 14672533 | 2.9984 | 7.8989 | -1.8231 |
| YRI | NPIP | 14677533 | 2.6809 | 6.7225 | -1.7415 |
| YRI | NPIP | 14682533 | 2.2973 | 6.5544 | -1.8769 |
| YRI | NPIP | 14687533 | 2.3565 | 7.7309 | -2.0392 |
| YRI | NPIP | 14692533 | 2.6376 | 9.4115 | -2.1439 |
| YRI | NPIP | 14697533 | 3.8368 | 8.4031 | -1.6049 |
| YRI | NPIP | 14702533 | 4.4588 | 8.9073 | -1.4816 |
| YRI | NPIP | 14707533 | 3.9685 | 9.4115 | -1.7227 |
| YRI | NPIP | 14712533 | 2.7564 | 7.7309 | -1.8875 |
| YRI | NPIP | 14717533 | 1.3132 | 8.235  | -2.4784 |
| YRI | NPIP | 14722533 | 1.0934 | 7.2267 | -2.4749 |
| YRI | NPIP | 14727533 | 1.9231 | 5.5461 | -1.8553 |
| YRI | NPIP | 14732533 | 2.6049 | 7.7309 | -1.9449 |
| YRI | NPIP | 14737533 | 3.1597 | 7.5628 | -1.7046 |
| YRI | NPIP | 14742533 | 2.8964 | 5.8822 | -1.4508 |
| YRI | NPIP | 14747533 | 2.1012 | 7.3947 | -2.0917 |
| YRI | NPIP | 14752533 | 2.3003 | 8.5712 | -2.1641 |
| YRI | NPIP | 14757533 | 1.9719 | 7.2267 | -2.1204 |
| YRI | NPIP | 14762533 | 2.1364 | 8.067  | -2.1641 |
| YRI | NPIP | 14767533 | 1.9997 | 7.7309 | -2.1746 |

## 2\_TajimasD\_data

|     |      |          |        |        |         |
|-----|------|----------|--------|--------|---------|
| YRI | NPIP | 14772533 | 2.4261 | 6.5544 | -1.8201 |
| YRI | NPIP | 14777533 | 3.7264 | 9.2434 | -1.7755 |
| YRI | NPIP | 14782533 | 2.0887 | 6.0502 | -1.877  |
| YRI | NPIP | 14787533 | 0.0278 | 0.5042 | -1.4972 |
| YRI | NPIP | 14792533 | 0      | 0      | 0       |
| YRI | NPIP | 14797533 | 0      | 0      | 0       |
| YRI | NPIP | 14802533 | 0      | 0      | 0       |
| YRI | NPIP | 14807533 | 0      | 0      | 0       |
| YRI | NPIP | 14812533 | 0      | 0      | 0       |
| YRI | NPIP | 14817533 | 0.1063 | 0.5042 | -1.2505 |
| YRI | NPIP | 14822533 | 0.4422 | 1.1764 | -1.3132 |
| YRI | NPIP | 14827533 | 0.3359 | 0.6722 | -0.8804 |
| YRI | NPIP | 14832533 | 0.1057 | 0.1681 | -0.3709 |
| YRI | NPIP | 14837533 | 0.1057 | 0.1681 | -0.3709 |
| YRI | NPIP | 14842533 | 0      | 0      | 0       |
| YRI | NPIP | 14847533 | 0.358  | 0.3361 | 0.0879  |
| YRI | NPIP | 14852533 | 0.358  | 0.3361 | 0.0879  |
| YRI | NPIP | 14857533 | 0.2118 | 0.8403 | -1.4196 |
| YRI | NPIP | 14862533 | 1.6827 | 4.8738 | -1.8318 |
| YRI | NPIP | 14867533 | 5.8325 | 7.7309 | -0.7203 |
| YRI | NPIP | 14872533 | 5.3415 | 5.7141 | -0.1858 |
| YRI | NPIP | 14877533 | 1.4132 | 2.689  | -1.2125 |
| YRI | NPIP | 14882533 | 0.4702 | 1.0084 | -1.073  |
| YRI | NPIP | 14887533 | 0.3165 | 1.1764 | -1.538  |
| YRI | NPIP | 14892533 | 0.733  | 2.5209 | -1.7905 |
| YRI | NPIP | 14897533 | 2.2444 | 5.0419 | -1.5587 |
| YRI | NPIP | 14902533 | 2.738  | 5.0419 | -1.2837 |
| YRI | NPIP | 14907533 | 1.6146 | 5.0419 | -1.9096 |
| YRI | NPIP | 14912533 | 2.8798 | 5.8822 | -1.4589 |
| YRI | NPIP | 14917533 | 1.9839 | 4.8738 | -1.6589 |
| YRI | NPIP | 14922533 | 1.5765 | 6.0502 | -2.1197 |
| YRI | NPIP | 14927533 | 2.7354 | 6.5544 | -1.6837 |
| YRI | NPIP | 14932533 | 2.2124 | 5.8822 | -1.7832 |
| YRI | NPIP | 14937533 | 1.556  | 4.7057 | -1.8645 |
| YRI | NPIP | 14942533 | 1.8155 | 4.7057 | -1.7109 |
| YRI | NPIP | 14947533 | 2.3197 | 6.3864 | -1.8354 |
| YRI | NPIP | 14952533 | 1.562  | 5.5461 | -2.0402 |
| YRI | NPIP | 14957533 | 2.5198 | 6.0502 | -1.6727 |
| YRI | NPIP | 14962533 | 3.52   | 8.4031 | -1.7162 |
| YRI | NPIP | 14967533 | 4.7105 | 9.2434 | -1.4588 |
| YRI | NPIP | 14972533 | 4.4516 | 7.5628 | -1.2044 |
| YRI | NPIP | 14977533 | 1.2973 | 5.5461 | -2.1758 |
| YRI | NPIP | 14982533 | 2.0261 | 6.3864 | -1.9679 |
| YRI | NPIP | 14987533 | 2.1389 | 6.0502 | -1.8532 |
| YRI | NPIP | 14992533 | 0.7104 | 4.3696 | -2.3105 |
| YRI | NPIP | 14997533 | 0.6076 | 2.5209 | -1.9161 |
| YRI | NPIP | 15002533 | 0.8027 | 1.3445 | -0.88   |
| YRI | NPIP | 15007533 | 0.6526 | 1.3445 | -1.1238 |
| YRI | NPIP | 15012533 | 0.4202 | 2.689  | -2.1562 |

## 2\_TajimasD\_data

|     |      |          |         |         |         |
|-----|------|----------|---------|---------|---------|
| YRI | NPIP | 15017533 | 1.999   | 4.7057  | -1.6022 |
| YRI | NPIP | 15022533 | 3.6122  | 6.3864  | -1.2521 |
| YRI | NPIP | 15027533 | 2.1372  | 5.0419  | -1.6184 |
| YRI | NPIP | 15032533 | 0.4942  | 3.0251  | -2.1833 |
| YRI | NPIP | 15037533 | 0.9518  | 2.689   | -1.651  |
| YRI | NPIP | 15042533 | 1.7885  | 2.8571  | -0.9664 |
| YRI | NPIP | 15047533 | 4.6752  | 8.5712  | -1.3445 |
| YRI | NPIP | 15052533 | 8.4374  | 11.9324 | -0.886  |
| YRI | NPIP | 15057533 | 9.2442  | 10.0837 | -0.2492 |
| YRI | NPIP | 15062533 | 5.863   | 8.067   | -0.8043 |
| YRI | NPIP | 15067533 | 3.1102  | 6.5544  | -1.5185 |
| YRI | NPIP | 15072533 | 4.5612  | 7.7309  | -1.2027 |
| YRI | NPIP | 15077533 | 5.8454  | 9.2434  | -1.0936 |
| YRI | NPIP | 15082533 | 6.6149  | 10.4199 | -1.0953 |
| YRI | NPIP | 15087533 | 5.5327  | 9.2434  | -1.1942 |
| YRI | NPIP | 15092533 | 4.0304  | 7.7309  | -1.4041 |
| YRI | NPIP | 15097533 | 4.8267  | 8.4031  | -1.257  |
| YRI | NPIP | 15102533 | 4.8705  | 7.8989  | -1.1266 |
| YRI | NPIP | 15107533 | 4.9834  | 8.7392  | -1.2731 |
| YRI | NPIP | 15112533 | 4.6765  | 10.2518 | -1.6295 |
| YRI | NPIP | 15117533 | 6.4383  | 12.1005 | -1.4166 |
| YRI | NPIP | 15122533 | 6.4801  | 11.9324 | -1.3821 |
| YRI | NPIP | 15127533 | 8.1244  | 10.5879 | -0.6986 |
| YRI | NPIP | 15132533 | 10.3646 | 11.2602 | -0.2398 |
| YRI | NPIP | 15137533 | 7.3968  | 10.756  | -0.9387 |
| YRI | NPIP | 15142533 | 5.6655  | 8.5712  | -1.0028 |
| YRI | NPIP | 15147533 | 5.6385  | 8.4031  | -0.9716 |
| YRI | NPIP | 15152533 | 7.3843  | 9.9157  | -0.7632 |
| YRI | NPIP | 15157533 | 7.6107  | 9.7476  | -0.6546 |
| YRI | NPIP | 15162533 | 5.8583  | 8.7392  | -0.9765 |
| YRI | NPIP | 15167533 | 6.2644  | 9.0754  | -0.9202 |
| YRI | NPIP | 15172533 | 7.4066  | 10.0837 | -0.7946 |
| YRI | NPIP | 15177533 | 7.321   | 9.4115  | -0.6616 |
| YRI | NPIP | 15182533 | 5.5327  | 8.067   | -0.9248 |
| YRI | NPIP | 15187533 | 4.0659  | 7.3947  | -1.3154 |
| YRI | NPIP | 15192533 | 3.9526  | 8.067   | -1.5014 |
| YRI | NPIP | 15197533 | 4.4203  | 9.4115  | -1.5797 |
| YRI | NPIP | 15202533 | 5.3881  | 8.9073  | -1.1721 |
| YRI | NPIP | 15207533 | 3.764   | 5.2099  | -0.7826 |
| YRI | NPIP | 15212533 | 2.1279  | 3.6974  | -1.144  |
| YRI | NPIP | 15217533 | 6.3332  | 10.2518 | -1.1453 |
| YRI | NPIP | 15222533 | 11.5447 | 18.823  | -1.1954 |
| YRI | NPIP | 15227533 | 9.0016  | 16.302  | -1.3763 |
| YRI | NPIP | 15232533 | 5.5217  | 10.924  | -1.4879 |
| YRI | NPIP | 15237533 | 4.0692  | 10.4199 | -1.8282 |
| YRI | NPIP | 15242533 | 3.6693  | 9.5795  | -1.84   |
| YRI | NPIP | 15247533 | 6.789   | 9.7476  | -0.9063 |
| YRI | NPIP | 15252533 | 6.239   | 8.067   | -0.667  |
| YRI | NPIP | 15257533 | 3.1625  | 5.5461  | -1.2206 |

## 2\_TajimasD\_data

|     |      |          |         |         |         |
|-----|------|----------|---------|---------|---------|
| CEU | NPIP | 14442443 | 10.3311 | 8.3576  | 0.7015  |
| CEU | NPIP | 14447443 | 9.6364  | 9.2104  | 0.1384  |
| CEU | NPIP | 14452443 | 11.9604 | 10.0632 | 0.5678  |
| CEU | NPIP | 14457443 | 15.3719 | 11.5982 | 0.9887  |
| CEU | NPIP | 14462443 | 16.6625 | 11.7688 | 1.2647  |
| CEU | NPIP | 14467443 | 15.7825 | 13.9861 | 0.3943  |
| CEU | NPIP | 14472443 | 13.7638 | 14.6684 | -0.1898 |
| CEU | NPIP | 14477443 | 7.941   | 9.3809  | -0.46   |
| CEU | NPIP | 14482443 | 2.5452  | 4.4346  | -1.1855 |
| CEU | NPIP | 14487443 | 4.2092  | 5.1169  | -0.5024 |
| CEU | NPIP | 14492443 | 6.961   | 7.3342  | -0.1495 |
| CEU | NPIP | 14497443 | 6.0853  | 6.4814  | -0.1775 |
| CEU | NPIP | 14502443 | 3.3049  | 4.4346  | -0.7088 |
| CEU | NPIP | 14507443 | 4.4772  | 5.6286  | -0.5857 |
| CEU | NPIP | 14512443 | 4.1325  | 5.6286  | -0.761  |
| CEU | NPIP | 14517443 | 1.9371  | 5.1169  | -1.7601 |
| CEU | NPIP | 14522443 | 3.3636  | 6.3108  | -1.3531 |
| CEU | NPIP | 14527443 | 3.7796  | 6.6519  | -1.2575 |
| CEU | NPIP | 14532443 | 3.1235  | 5.6286  | -1.2742 |
| CEU | NPIP | 14537443 | 4.2419  | 6.3108  | -0.9499 |
| CEU | NPIP | 14542443 | 4.4476  | 6.9931  | -1.0651 |
| CEU | NPIP | 14547443 | 2.9641  | 5.458   | -1.3038 |
| CEU | NPIP | 14552443 | 1.8551  | 4.2641  | -1.5638 |
| CEU | NPIP | 14557443 | 2.3086  | 4.2641  | -1.2694 |
| CEU | NPIP | 14562443 | 3.9973  | 6.4814  | -1.1134 |
| CEU | NPIP | 14567443 | 2.8689  | 5.7991  | -1.4513 |
| CEU | NPIP | 14572443 | 1.5242  | 5.2874  | -2.0235 |
| CEU | NPIP | 14577443 | 2.8536  | 7.1636  | -1.7643 |
| CEU | NPIP | 14582443 | 2.6343  | 5.2874  | -1.4266 |
| CEU | NPIP | 14587443 | 1.9742  | 6.1402  | -1.9604 |
| CEU | NPIP | 14592443 | 2.5613  | 7.6753  | -1.9657 |
| CEU | NPIP | 14597443 | 2.7326  | 5.7991  | -1.5188 |
| CEU | NPIP | 14602443 | 2.3793  | 4.0935  | -1.1527 |
| CEU | NPIP | 14607443 | 2.1373  | 4.0935  | -1.3154 |
| CEU | NPIP | 14612443 | 2.1789  | 5.458   | -1.7142 |
| CEU | NPIP | 14617443 | 3.2049  | 4.7757  | -0.9239 |
| CEU | NPIP | 14622443 | 7.5112  | 5.9697  | 0.7439  |
| CEU | NPIP | 14627443 | 8.7864  | 7.3342  | 0.5819  |
| CEU | NPIP | 14632443 | 9.3956  | 8.0164  | 0.5094  |
| CEU | NPIP | 14637443 | 10.5457 | 8.8692  | 0.5641  |
| CEU | NPIP | 14642443 | 5.7244  | 5.9697  | -0.1184 |
| CEU | NPIP | 14647443 | 3.7304  | 5.1169  | -0.7675 |
| CEU | NPIP | 14652443 | 4.8557  | 6.1402  | -0.6044 |
| CEU | NPIP | 14657443 | 4.5213  | 5.7991  | -0.6329 |
| CEU | NPIP | 14662443 | 3.5677  | 7.1636  | -1.472  |
| CEU | NPIP | 14667443 | 3.6578  | 8.6987  | -1.727  |
| CEU | NPIP | 14672443 | 4.941   | 6.3108  | -0.6289 |
| CEU | NPIP | 14677443 | 4.5184  | 4.4346  | 0.0526  |
| CEU | NPIP | 14682443 | 3.9567  | 5.7991  | -0.9125 |

## 2\_TajimasD\_data

|     |      |          |        |        |         |
|-----|------|----------|--------|--------|---------|
| CEU | NPIP | 14687443 | 2.9318 | 6.1402 | -1.5098 |
| CEU | NPIP | 14692443 | 1.8734 | 6.3108 | -2.0373 |
| CEU | NPIP | 14697443 | 4.0016 | 6.9931 | -1.2517 |
| CEU | NPIP | 14702443 | 5.066  | 6.6519 | -0.6943 |
| CEU | NPIP | 14707443 | 4.5364 | 7.1636 | -1.0754 |
| CEU | NPIP | 14712443 | 3.169  | 6.4814 | -1.4847 |
| CEU | NPIP | 14717443 | 1.0518 | 3.9229 | -2.0025 |
| CEU | NPIP | 14722443 | 0.9321 | 3.4112 | -1.9471 |
| CEU | NPIP | 14727443 | 2.1172 | 4.6052 | -1.5106 |
| CEU | NPIP | 14732443 | 2.9205 | 5.1169 | -1.2157 |
| CEU | NPIP | 14737443 | 3.8258 | 5.1169 | -0.7146 |
| CEU | NPIP | 14742443 | 2.5539 | 4.6052 | -1.2454 |
| CEU | NPIP | 14747443 | 1.274  | 4.2641 | -1.941  |
| CEU | NPIP | 14752443 | 2.9951 | 4.7757 | -1.0472 |
| CEU | NPIP | 14757443 | 3.1886 | 5.2874 | -1.1285 |
| CEU | NPIP | 14762443 | 2.3913 | 6.3108 | -1.7995 |
| CEU | NPIP | 14767443 | 1.6588 | 5.1169 | -1.9141 |
| CEU | NPIP | 14772443 | 2.8613 | 4.0935 | -0.8286 |
| CEU | NPIP | 14777443 | 4.1952 | 6.1402 | -0.9153 |
| CEU | NPIP | 14782443 | 2.1222 | 4.2641 | -1.3904 |
| CEU | NPIP | 14787443 | 0.1837 | 0.5117 | -1.0287 |
| CEU | NPIP | 14792443 | 0.0101 | 0.1706 | -0.9534 |
| CEU | NPIP | 14797443 | 0.0101 | 0.1706 | -0.9534 |
| CEU | NPIP | 14802443 | 0      | 0      | 0       |
| CEU | NPIP | 14807443 | 0      | 0      | 0       |
| CEU | NPIP | 14812443 | 0      | 0      | 0       |
| CEU | NPIP | 14817443 | 0.1309 | 0.1706 | -0.2358 |
| CEU | NPIP | 14822443 | 0.5803 | 1.0234 | -0.8805 |
| CEU | NPIP | 14827443 | 0.4494 | 0.8528 | -0.9084 |
| CEU | NPIP | 14832443 | 0.095  | 0.1706 | -0.4491 |
| CEU | NPIP | 14837443 | 0.095  | 0.1706 | -0.4491 |
| CEU | NPIP | 14842443 | 0.0202 | 0.1706 | -0.8934 |
| CEU | NPIP | 14847443 | 0.1441 | 0.3411 | -0.7897 |
| CEU | NPIP | 14852443 | 0.1239 | 0.1706 | -0.2774 |
| CEU | NPIP | 14857443 | 0.873  | 0.6822 | 0.4982  |
| CEU | NPIP | 14862443 | 2.772  | 4.2641 | -0.9686 |
| CEU | NPIP | 14867443 | 5.6197 | 7.1636 | -0.632  |
| CEU | NPIP | 14872443 | 4.08   | 4.4346 | -0.2225 |
| CEU | NPIP | 14877443 | 0.986  | 2.0467 | -1.2621 |
| CEU | NPIP | 14882443 | 1.0724 | 1.3645 | -0.4726 |
| CEU | NPIP | 14887443 | 0.8854 | 0.5117 | 1.172   |
| CEU | NPIP | 14892443 | 0.7318 | 1.7056 | -1.3337 |
| CEU | NPIP | 14897443 | 1.4585 | 3.2407 | -1.4614 |
| CEU | NPIP | 14902443 | 1.7772 | 3.5818 | -1.3601 |
| CEU | NPIP | 14907443 | 0.9629 | 3.0701 | -1.8075 |
| CEU | NPIP | 14912443 | 1.8516 | 3.4112 | -1.2249 |
| CEU | NPIP | 14917443 | 1.6098 | 2.8996 | -1.16   |
| CEU | NPIP | 14922443 | 0.9248 | 2.0467 | -1.3349 |
| CEU | NPIP | 14927443 | 1.8978 | 2.729  | -0.7857 |

## 2\_TajimasD\_data

|     |      |          |         |        |         |
|-----|------|----------|---------|--------|---------|
| CEU | NPIP | 14932443 | 1.8592  | 2.8996 | -0.9357 |
| CEU | NPIP | 14937443 | 1.7679  | 2.8996 | -1.0178 |
| CEU | NPIP | 14942443 | 1.683   | 3.0701 | -1.1898 |
| CEU | NPIP | 14947443 | 1.7128  | 2.8996 | -1.0673 |
| CEU | NPIP | 14952443 | 1.5673  | 3.0701 | -1.2891 |
| CEU | NPIP | 14957443 | 2.2956  | 4.6052 | -1.4023 |
| CEU | NPIP | 14962443 | 2.9223  | 4.2641 | -0.871  |
| CEU | NPIP | 14967443 | 4.9305  | 4.9463 | -0.009  |
| CEU | NPIP | 14972443 | 4.0952  | 4.4346 | -0.213  |
| CEU | NPIP | 14977443 | 0.6178  | 2.5584 | -1.9332 |
| CEU | NPIP | 14982443 | 1.402   | 3.9229 | -1.7583 |
| CEU | NPIP | 14987443 | 1.408   | 4.0935 | -1.8058 |
| CEU | NPIP | 14992443 | 0.6157  | 3.2407 | -2.1524 |
| CEU | NPIP | 14997443 | 0.4651  | 1.8762 | -1.7966 |
| CEU | NPIP | 15002443 | 0.4599  | 0.8528 | -0.8848 |
| CEU | NPIP | 15007443 | 0.3436  | 0.5117 | -0.5272 |
| CEU | NPIP | 15012443 | 0.0503  | 0.6822 | -1.6501 |
| CEU | NPIP | 15017443 | 1.383   | 1.7056 | -0.4418 |
| CEU | NPIP | 15022443 | 2.4187  | 2.729  | -0.2933 |
| CEU | NPIP | 15027443 | 1.6106  | 2.3879 | -0.8186 |
| CEU | NPIP | 15032443 | 1.0049  | 2.0467 | -1.2396 |
| CEU | NPIP | 15037443 | 0.9091  | 1.7056 | -1.0909 |
| CEU | NPIP | 15042443 | 1.1012  | 2.0467 | -1.125  |
| CEU | NPIP | 15047443 | 3.4051  | 5.2874 | -1.0121 |
| CEU | NPIP | 15052443 | 6.6147  | 7.6753 | -0.4077 |
| CEU | NPIP | 15057443 | 7.5869  | 8.8692 | -0.4315 |
| CEU | NPIP | 15062443 | 5.247   | 7.6753 | -0.9334 |
| CEU | NPIP | 15067443 | 3.3859  | 5.458  | -1.0832 |
| CEU | NPIP | 15072443 | 4.1593  | 5.2874 | -0.6066 |
| CEU | NPIP | 15077443 | 5.5257  | 6.3108 | -0.3605 |
| CEU | NPIP | 15082443 | 7.2505  | 9.0398 | -0.5916 |
| CEU | NPIP | 15087443 | 6.3471  | 7.8459 | -0.5646 |
| CEU | NPIP | 15092443 | 4.596   | 6.6519 | -0.9001 |
| CEU | NPIP | 15097443 | 4.5395  | 7.1636 | -1.0742 |
| CEU | NPIP | 15102443 | 4.1266  | 6.6519 | -1.1056 |
| CEU | NPIP | 15107443 | 4.6718  | 6.8225 | -0.9203 |
| CEU | NPIP | 15112443 | 5.0441  | 6.4814 | -0.6442 |
| CEU | NPIP | 15117443 | 6.4061  | 7.3342 | -0.3719 |
| CEU | NPIP | 15122443 | 6.1892  | 7.3342 | -0.4588 |
| CEU | NPIP | 15127443 | 10.2004 | 9.2104 | 0.3217  |
| CEU | NPIP | 15132443 | 12.4238 | 10.916 | 0.4182  |
| CEU | NPIP | 15137443 | 9.6411  | 9.0398 | 0.1988  |
| CEU | NPIP | 15142443 | 9.4838  | 7.6753 | 0.6951  |
| CEU | NPIP | 15147443 | 8.1431  | 6.6519 | 0.6529  |
| CEU | NPIP | 15152443 | 7.0963  | 7.1636 | -0.0275 |
| CEU | NPIP | 15157443 | 6.3461  | 6.8225 | -0.2039 |
| CEU | NPIP | 15162443 | 5.4263  | 5.458  | -0.0166 |
| CEU | NPIP | 15167443 | 6.5337  | 6.9931 | -0.1922 |
| CEU | NPIP | 15172443 | 8.0614  | 8.0164 | 0.0166  |

## 2\_TajimasD\_data

|     |      |          |        |         |         |
|-----|------|----------|--------|---------|---------|
| CEU | NPIP | 15177443 | 7.4914 | 7.3342  | 0.063   |
| CEU | NPIP | 15182443 | 5.7642 | 7.3342  | -0.6291 |
| CEU | NPIP | 15187443 | 3.5622 | 6.3108  | -1.2619 |
| CEU | NPIP | 15192443 | 2.7726 | 5.7991  | -1.499  |
| CEU | NPIP | 15197443 | 4.5968 | 6.8225  | -0.9524 |
| CEU | NPIP | 15202443 | 5.6174 | 7.1636  | -0.6329 |
| CEU | NPIP | 15207443 | 3.1503 | 4.6052  | -0.8833 |
| CEU | NPIP | 15212443 | 1.6347 | 2.2173  | -0.6509 |
| CEU | NPIP | 15217443 | 3.7361 | 6.6519  | -1.2766 |
| CEU | NPIP | 15222443 | 6.4401 | 11.9394 | -1.4021 |
| CEU | NPIP | 15227443 | 6.2736 | 10.4043 | -1.1983 |
| CEU | NPIP | 15232443 | 4.2944 | 7.5047  | -1.2596 |
| CEU | NPIP | 15237443 | 2.511  | 7.1636  | -1.9045 |
| CEU | NPIP | 15242443 | 2.6071 | 5.1169  | -1.3892 |
| CEU | NPIP | 15247443 | 3.6319 | 4.6052  | -0.5909 |
| CEU | NPIP | 15252443 | 4.3081 | 7.1636  | -1.1689 |
| CEU | NPIP | 15257443 | 2.791  | 5.7991  | -1.4899 |
| CEU | NPIP | 15262443 | 2.2408 | 4.2641  | -1.3134 |
| CEU | NPIP | 15267443 | 2.0915 | 4.4346  | -1.4701 |
| CEU | NPIP | 15272443 | 1.6494 | 3.7524  | -1.5236 |
| CEU | NPIP | 15277443 | 4.368  | 3.9229  | 0.3104  |
| CEU | NPIP | 15282443 | 4.4729 | 4.4346  | 0.024   |
| CEU | NPIP | 15287443 | 2.1808 | 4.0935  | -1.2862 |
| CEU | NPIP | 15292443 | 1.9922 | 4.2641  | -1.4748 |
| CEU | NPIP | 15297443 | 4.3088 | 6.4814  | -0.9738 |
| CEU | NPIP | 15302443 | 5.8231 | 5.9697  | -0.0708 |
| CEU | NPIP | 15307443 | 5.3731 | 3.7524  | 1.1742  |
| CEU | NPIP | 15312443 | 6.6557 | 4.6052  | 1.245   |
| CEU | NPIP | 15317443 | 4.8545 | 4.4346  | 0.2635  |
| CEU | NPIP | 15322443 | 6.261  | 6.6519  | -0.1711 |
| CEU | NPIP | 15327443 | 6      | 5.458   | 0.2833  |
| CEU | NPIP | 15332443 | 1.2622 | 1.5351  | -0.4047 |
| CEU | NPIP | 15337443 | 0.7376 | 1.5351  | -1.1825 |
| CEU | NPIP | 15342443 | 0.8252 | 1.1939  | -0.657  |
| CEU | NPIP | 15347443 | 1.3929 | 1.5351  | -0.2109 |
| CEU | NPIP | 15352443 | 1.9458 | 2.2173  | -0.3033 |
| CEU | NPIP | 15357443 | 2.7403 | 3.7524  | -0.7332 |
| CEU | NPIP | 15362443 | 2.0377 | 3.9229  | -1.3149 |
| CEU | NPIP | 15367443 | 2.2416 | 2.8996  | -0.5918 |
| CEU | NPIP | 15372443 | 2.1497 | 2.3879  | -0.2508 |
| CEU | NPIP | 15377443 | 6.5459 | 5.458   | 0.5687  |
| CEU | NPIP | 15382443 | 9.5479 | 7.1636  | 0.976   |
| CEU | NPIP | 15387443 | 5.0588 | 4.2641  | 0.5159  |
| CEU | NPIP | 15392443 | 5.1144 | 5.6286  | -0.2616 |
| CEU | NPIP | 15397443 | 8.1589 | 8.187   | -0.0102 |
| CEU | NPIP | 15402443 | 7.079  | 6.8225  | 0.1098  |
| CEU | NPIP | 15407443 | 6.3894 | 5.9697  | 0.2026  |
| CEU | NPIP | 15412443 | 7.6145 | 6.1402  | 0.6938  |
| CEU | NPIP | 15417443 | 6.4374 | 6.1402  | 0.1399  |

## 2\_TajimasD\_data

|     |      |          |         |         |         |
|-----|------|----------|---------|---------|---------|
| CEU | NPIP | 15422443 | 3.4682  | 3.9229  | -0.3171 |
| CEU | NPIP | 15427443 | 0.6735  | 1.3645  | -1.1179 |
| CEU | NPIP | 15432443 | 0.6226  | 1.3645  | -1.2002 |
| CEU | NPIP | 15437443 | 1.0532  | 1.1939  | -0.2507 |
| CEU | NPIP | 15442443 | 1.5424  | 1.1939  | 0.621   |
| CHB | NPIP | 14442443 | 10.6688 | 10.3343 | 0.0974  |
| CHB | NPIP | 14447443 | 9.7264  | 8.979   | 0.2479  |
| CHB | NPIP | 14452443 | 12.0575 | 9.1484  | 0.9485  |
| CHB | NPIP | 14457443 | 14.3939 | 11.012  | 0.9276  |
| CHB | NPIP | 14462443 | 14.1909 | 14.4003 | -0.0446 |
| CHB | NPIP | 14467443 | 13.1841 | 15.4168 | -0.4455 |
| CHB | NPIP | 14472443 | 11.6364 | 12.3673 | -0.1797 |
| CHB | NPIP | 14477443 | 6.897   | 8.3013  | -0.5008 |
| CHB | NPIP | 14482443 | 1.8418  | 5.2519  | -1.8392 |
| CHB | NPIP | 14487443 | 2.6168  | 5.2519  | -1.4212 |
| CHB | NPIP | 14492443 | 4.1321  | 7.4543  | -1.3077 |
| CHB | NPIP | 14497443 | 3.4702  | 7.2848  | -1.5333 |
| CHB | NPIP | 14502443 | 2.455   | 5.0825  | -1.4587 |
| CHB | NPIP | 14507443 | 3.9335  | 5.4213  | -0.7802 |
| CHB | NPIP | 14512443 | 3.8699  | 6.2684  | -1.1047 |
| CHB | NPIP | 14517443 | 1.4485  | 6.2684  | -2.2199 |
| CHB | NPIP | 14522443 | 0.8292  | 6.6072  | -2.5378 |
| CHB | NPIP | 14527443 | 1.5372  | 6.2684  | -2.179  |
| CHB | NPIP | 14532443 | 3.1961  | 5.0825  | -1.0473 |
| CHB | NPIP | 14537443 | 4.9772  | 5.4213  | -0.2329 |
| CHB | NPIP | 14542443 | 5.9743  | 7.1154  | -0.4686 |
| CHB | NPIP | 14547443 | 4.4666  | 7.1154  | -1.0878 |
| CHB | NPIP | 14552443 | 2.301   | 5.2519  | -1.5915 |
| CHB | NPIP | 14557443 | 2.0356  | 4.4048  | -1.4908 |
| CHB | NPIP | 14562443 | 2.2559  | 4.7436  | -1.4674 |
| CHB | NPIP | 14567443 | 1.9386  | 5.4213  | -1.8262 |
| CHB | NPIP | 14572443 | 1.623   | 5.4213  | -1.9917 |
| CHB | NPIP | 14577443 | 1.8369  | 5.5907  | -1.9153 |
| CHB | NPIP | 14582443 | 1.1812  | 5.4213  | -2.2234 |
| CHB | NPIP | 14587443 | 1.0626  | 5.9295  | -2.3561 |
| CHB | NPIP | 14592443 | 1.4512  | 6.6072  | -2.2646 |
| CHB | NPIP | 14597443 | 1.1805  | 5.5907  | -2.2502 |
| CHB | NPIP | 14602443 | 0.997   | 4.913   | -2.2399 |
| CHB | NPIP | 14607443 | 0.573   | 4.2354  | -2.3842 |
| CHB | NPIP | 14612443 | 0.6442  | 4.066   | -2.3074 |
| CHB | NPIP | 14617443 | 1.0628  | 4.5742  | -2.1382 |
| CHB | NPIP | 14622443 | 1.6648  | 8.1319  | -2.3506 |
| CHB | NPIP | 14627443 | 2.1157  | 9.8261  | -2.3525 |
| CHB | NPIP | 14632443 | 3.57    | 8.4708  | -1.7156 |
| CHB | NPIP | 14637443 | 3.5962  | 7.2848  | -1.4827 |
| CHB | NPIP | 14642443 | 1.802   | 6.0989  | -2.0283 |
| CHB | NPIP | 14647443 | 1.5614  | 7.4543  | -2.3196 |
| CHB | NPIP | 14652443 | 1.5591  | 8.3013  | -2.4046 |
| CHB | NPIP | 14657443 | 2.0548  | 7.6237  | -2.1475 |



## 2\_TajimasD\_data

|     |      |          |        |        |         |
|-----|------|----------|--------|--------|---------|
| CHB | NPIP | 14662443 | 1.7556 | 6.6072 | -2.1309 |
| CHB | NPIP | 14667443 | 1.7915 | 6.7766 | -2.1399 |
| CHB | NPIP | 14672443 | 2.1039 | 6.6072 | -1.9779 |
| CHB | NPIP | 14677443 | 1.6775 | 5.0825 | -1.8904 |
| CHB | NPIP | 14682443 | 2.1689 | 4.913  | -1.5696 |
| CHB | NPIP | 14687443 | 2.3587 | 7.9625 | -2.0766 |
| CHB | NPIP | 14692443 | 1.771  | 9.1484 | -2.4053 |
| CHB | NPIP | 14697443 | 3.0769 | 6.6072 | -1.5505 |
| CHB | NPIP | 14702443 | 4.0131 | 6.4378 | -1.0902 |
| CHB | NPIP | 14707443 | 3.5028 | 7.7931 | -1.6215 |
| CHB | NPIP | 14712443 | 2.317  | 6.946  | -1.9431 |
| CHB | NPIP | 14717443 | 0.7196 | 4.5742 | -2.3471 |
| CHB | NPIP | 14722443 | 0.7485 | 3.5577 | -2.1231 |
| CHB | NPIP | 14727443 | 1.352  | 3.8965 | -1.7797 |
| CHB | NPIP | 14732443 | 1.8237 | 4.2354 | -1.57   |
| CHB | NPIP | 14737443 | 2.996  | 4.7436 | -1.0309 |
| CHB | NPIP | 14742443 | 2.668  | 5.5907 | -1.4912 |
| CHB | NPIP | 14747443 | 1.9762 | 6.0989 | -1.9461 |
| CHB | NPIP | 14752443 | 2.2638 | 5.5907 | -1.6975 |
| CHB | NPIP | 14757443 | 1.8186 | 6.0989 | -2.0205 |
| CHB | NPIP | 14762443 | 1.3973 | 5.7601 | -2.1675 |
| CHB | NPIP | 14767443 | 1.13   | 4.5742 | -2.0972 |
| CHB | NPIP | 14772443 | 2.5418 | 5.0825 | -1.4105 |
| CHB | NPIP | 14777443 | 3.7514 | 7.1154 | -1.3815 |
| CHB | NPIP | 14782443 | 2.2501 | 5.2519 | -1.619  |
| CHB | NPIP | 14787443 | 0.3845 | 0.8471 | -1.0432 |
| CHB | NPIP | 14792443 | 0.0478 | 0.1694 | -0.7226 |
| CHB | NPIP | 14797443 | 0      | 0      | 0       |
| CHB | NPIP | 14802443 | 0      | 0      | 0       |
| CHB | NPIP | 14807443 | 0      | 0      | 0       |
| CHB | NPIP | 14812443 | 0      | 0      | 0       |
| CHB | NPIP | 14817443 | 0.0194 | 0.3388 | -1.2812 |
| CHB | NPIP | 14822443 | 0.5168 | 1.0165 | -0.9944 |
| CHB | NPIP | 14827443 | 0.4974 | 0.6777 | -0.4714 |
| CHB | NPIP | 14832443 | 0.0377 | 0.1694 | -0.7826 |
| CHB | NPIP | 14837443 | 0.0377 | 0.1694 | -0.7826 |
| CHB | NPIP | 14842443 | 0      | 0      | 0       |
| CHB | NPIP | 14847443 | 0.2142 | 0.1694 | 0.2662  |
| CHB | NPIP | 14852443 | 0.2142 | 0.1694 | 0.2662  |
| CHB | NPIP | 14857443 | 1.3556 | 0.6777 | 1.7722  |
| CHB | NPIP | 14862443 | 3.1196 | 3.7271 | -0.4413 |
| CHB | NPIP | 14867443 | 6.2157 | 6.4378 | -0.0999 |
| CHB | NPIP | 14872443 | 5.4278 | 4.4048 | 0.6437  |
| CHB | NPIP | 14877443 | 1.5534 | 1.6942 | -0.1932 |
| CHB | NPIP | 14882443 | 0.7377 | 1.0165 | -0.5548 |
| CHB | NPIP | 14887443 | 0.1989 | 0.6777 | -1.2517 |
| CHB | NPIP | 14892443 | 0.3337 | 1.6942 | -1.8671 |
| CHB | NPIP | 14897443 | 1.992  | 2.7106 | -0.6809 |
| CHB | NPIP | 14902443 | 1.9406 | 2.033  | -0.1102 |

## 2\_TajimasD\_data

|     |      |          |         |         |         |
|-----|------|----------|---------|---------|---------|
| CHB | NPIP | 14907443 | 0.5231  | 1.3553  | -1.3487 |
| CHB | NPIP | 14912443 | 2.4626  | 1.8636  | 0.7642  |
| CHB | NPIP | 14917443 | 2.2699  | 2.033   | 0.2825  |
| CHB | NPIP | 14922443 | 0.7472  | 2.033   | -1.5333 |
| CHB | NPIP | 14927443 | 1.3678  | 2.7106  | -1.2724 |
| CHB | NPIP | 14932443 | 1.7491  | 2.8801  | -1.0197 |
| CHB | NPIP | 14937443 | 1.5945  | 2.8801  | -1.1591 |
| CHB | NPIP | 14942443 | 1.3221  | 2.5412  | -1.2174 |
| CHB | NPIP | 14947443 | 2.1978  | 2.8801  | -0.6152 |
| CHB | NPIP | 14952443 | 1.506   | 3.0495  | -1.3274 |
| CHB | NPIP | 14957443 | 1.3647  | 3.3883  | -1.5936 |
| CHB | NPIP | 14962443 | 2.4359  | 3.8965  | -1.0216 |
| CHB | NPIP | 14967443 | 5.6341  | 4.913   | 0.4125  |
| CHB | NPIP | 14972443 | 5.2501  | 6.2684  | -0.469  |
| CHB | NPIP | 14977443 | 1.0927  | 4.5742  | -2.12   |
| CHB | NPIP | 14982443 | 2.459   | 3.3883  | -0.7318 |
| CHB | NPIP | 14987443 | 2.2749  | 3.3883  | -0.8768 |
| CHB | NPIP | 14992443 | 0.6777  | 2.2024  | -1.7073 |
| CHB | NPIP | 14997443 | 0.6908  | 1.5247  | -1.2389 |
| CHB | NPIP | 15002443 | 0.9025  | 1.1859  | -0.5059 |
| CHB | NPIP | 15007443 | 0.7839  | 0.5082  | 0.8655  |
| CHB | NPIP | 15012443 | 0.0864  | 0.6777  | -1.5458 |
| CHB | NPIP | 15017443 | 1.5153  | 1.5247  | -0.014  |
| CHB | NPIP | 15022443 | 3.0046  | 3.3883  | -0.3022 |
| CHB | NPIP | 15027443 | 1.9018  | 3.2189  | -1.0828 |
| CHB | NPIP | 15032443 | 0.4892  | 1.6942  | -1.6537 |
| CHB | NPIP | 15037443 | 0.5711  | 1.0165  | -0.8864 |
| CHB | NPIP | 15042443 | 1.9505  | 2.2024  | -0.2821 |
| CHB | NPIP | 15047443 | 4.4773  | 5.2519  | -0.4178 |
| CHB | NPIP | 15052443 | 6.28    | 7.4543  | -0.4622 |
| CHB | NPIP | 15057443 | 8.023   | 8.1319  | -0.0396 |
| CHB | NPIP | 15062443 | 6.356   | 7.2848  | -0.3733 |
| CHB | NPIP | 15067443 | 3.5102  | 5.4213  | -1.0021 |
| CHB | NPIP | 15072443 | 4.5395  | 4.913   | -0.2136 |
| CHB | NPIP | 15077443 | 5.5932  | 6.0989  | -0.2387 |
| CHB | NPIP | 15082443 | 6.4036  | 6.6072  | -0.0894 |
| CHB | NPIP | 15087443 | 5.9461  | 6.0989  | -0.0721 |
| CHB | NPIP | 15092443 | 4.64    | 6.4378  | -0.8083 |
| CHB | NPIP | 15097443 | 4.8108  | 7.2848  | -0.9945 |
| CHB | NPIP | 15102443 | 4.205   | 6.6072  | -1.0551 |
| CHB | NPIP | 15107443 | 4.6678  | 6.0989  | -0.6755 |
| CHB | NPIP | 15112443 | 5.6994  | 5.9295  | -0.1114 |
| CHB | NPIP | 15117443 | 5.9558  | 5.2519  | 0.3796  |
| CHB | NPIP | 15122443 | 5.2195  | 4.7436  | 0.2807  |
| CHB | NPIP | 15127443 | 11.1603 | 8.1319  | 1.1007  |
| CHB | NPIP | 15132443 | 14.0752 | 10.6731 | 0.9609  |
| CHB | NPIP | 15137443 | 10.9377 | 8.979   | 0.6498  |
| CHB | NPIP | 15142443 | 10.51   | 7.2848  | 1.2964  |
| CHB | NPIP | 15147443 | 8.1725  | 5.9295  | 1.0859  |

## 2\_TajimasD\_data

|     |      |          |         |         |         |
|-----|------|----------|---------|---------|---------|
| CHB | NPIP | 15152443 | 8.2239  | 7.2848  | 0.3775  |
| CHB | NPIP | 15157443 | 8.2867  | 7.1154  | 0.481   |
| CHB | NPIP | 15162443 | 6.3383  | 5.9295  | 0.1979  |
| CHB | NPIP | 15167443 | 6.9063  | 6.7766  | 0.0557  |
| CHB | NPIP | 15172443 | 8.3194  | 7.6237  | 0.2683  |
| CHB | NPIP | 15177443 | 8.7773  | 7.1154  | 0.6825  |
| CHB | NPIP | 15182443 | 6.9772  | 6.2684  | 0.3264  |
| CHB | NPIP | 15187443 | 3.985   | 5.4213  | -0.7532 |
| CHB | NPIP | 15192443 | 3.4654  | 5.0825  | -0.8978 |
| CHB | NPIP | 15197443 | 4.8924  | 6.2684  | -0.6337 |
| CHB | NPIP | 15202443 | 5.8378  | 5.9295  | -0.0444 |
| CHB | NPIP | 15207443 | 3.5772  | 3.2189  | 0.2946  |
| CHB | NPIP | 15212443 | 2.1793  | 2.2024  | -0.0259 |
| CHB | NPIP | 15217443 | 5.9516  | 6.4378  | -0.2186 |
| CHB | NPIP | 15222443 | 10.3606 | 11.6896 | -0.3447 |
| CHB | NPIP | 15227443 | 8.3845  | 9.1484  | -0.2491 |
| CHB | NPIP | 15232443 | 4.6111  | 5.9295  | -0.6383 |
| CHB | NPIP | 15237443 | 3.1064  | 7.2848  | -1.6796 |
| CHB | NPIP | 15242443 | 3.26    | 7.1154  | -1.5833 |
| CHB | NPIP | 15247443 | 5.5543  | 7.1154  | -0.6411 |
| CHB | NPIP | 15252443 | 5.5608  | 7.1154  | -0.6384 |
| CHB | NPIP | 15257443 | 2.7316  | 5.0825  | -1.3052 |
| CHB | NPIP | 15262443 | 3.6442  | 4.913   | -0.7257 |
| CHB | NPIP | 15267443 | 3.5894  | 5.5907  | -1.0211 |
| CHB | NPIP | 15272443 | 2.9524  | 5.7601  | -1.3949 |
| CHB | NPIP | 15277443 | 5.2597  | 5.7601  | -0.2486 |
| CHB | NPIP | 15282443 | 4.6298  | 4.4048  | 0.1416  |
| CHB | NPIP | 15287443 | 2.4956  | 3.7271  | -0.8947 |
| CHB | NPIP | 15292443 | 2.2157  | 4.5742  | -1.4361 |
| CHB | NPIP | 15297443 | 5.6229  | 6.4378  | -0.3664 |
| CHB | NPIP | 15302443 | 6.9777  | 5.2519  | 0.9308  |
| CHB | NPIP | 15307443 | 5.992   | 3.8965  | 1.4656  |
| CHB | NPIP | 15312443 | 7.0645  | 5.5907  | 0.752   |
| CHB | NPIP | 15317443 | 4.7626  | 4.4048  | 0.2251  |
| CHB | NPIP | 15322443 | 6.7824  | 5.2519  | 0.8254  |
| CHB | NPIP | 15327443 | 6.2488  | 4.913   | 0.7641  |
| CHB | NPIP | 15332443 | 1.1858  | 1.3553  | -0.2747 |
| CHB | NPIP | 15337443 | 0.7072  | 1.5247  | -1.2145 |
| CHB | NPIP | 15342443 | 0.6433  | 1.3553  | -1.1539 |
| CHB | NPIP | 15347443 | 1.6261  | 1.6942  | -0.0935 |
| CHB | NPIP | 15352443 | 2.1531  | 2.2024  | -0.0552 |
| CHB | NPIP | 15357443 | 2.2275  | 2.8801  | -0.5884 |
| CHB | NPIP | 15362443 | 1.3413  | 3.3883  | -1.6121 |
| CHB | NPIP | 15367443 | 1.973   | 3.3883  | -1.1146 |
| CHB | NPIP | 15372443 | 2.1862  | 2.7106  | -0.4969 |
| CHB | NPIP | 15377443 | 4.9307  | 4.7436  | 0.1104  |
| CHB | NPIP | 15382443 | 7.4671  | 6.946   | 0.2187  |
| CHB | NPIP | 15387443 | 4.0073  | 4.066   | -0.0396 |
| CHB | NPIP | 15392443 | 5.2244  | 3.8965  | 0.9288  |

## 2\_TajimasD\_data

|     |      |          |         |         |         |
|-----|------|----------|---------|---------|---------|
| CHB | NPIP | 15397443 | 7.7416  | 7.1154  | 0.2572  |
| CHB | NPIP | 15402443 | 5.1756  | 6.0989  | -0.4358 |
| CHB | NPIP | 15407443 | 4.6693  | 4.7436  | -0.0438 |
| CHB | NPIP | 15412443 | 6.238   | 6.2684  | -0.014  |
| CHB | NPIP | 15417443 | 5.3686  | 5.5907  | -0.1133 |
| CHB | NPIP | 15422443 | 2.9949  | 2.7106  | 0.2694  |
| CHB | NPIP | 15427443 | 0.9608  | 0.8471  | 0.2564  |
| CHB | NPIP | 15432443 | 0.692   | 0.6777  | 0.0374  |
| CHB | NPIP | 15437443 | 0.9663  | 0.8471  | 0.2688  |
| CHB | NPIP | 15442443 | 1.1097  | 0.8471  | 0.5922  |
| YRI | NPIP | 14442443 | 11.6581 | 16.302  | -0.8755 |
| YRI | NPIP | 14447443 | 10.0517 | 13.7811 | -0.8251 |
| YRI | NPIP | 14452443 | 11.3101 | 13.9492 | -0.5772 |
| YRI | NPIP | 14457443 | 12.8544 | 16.9743 | -0.7472 |
| YRI | NPIP | 14462443 | 14.0702 | 18.991  | -0.8013 |
| YRI | NPIP | 14467443 | 15.9449 | 17.3104 | -0.2431 |
| YRI | NPIP | 14472443 | 15.1461 | 15.6298 | -0.0949 |
| YRI | NPIP | 14477443 | 9.2406  | 11.7644 | -0.6484 |
| YRI | NPIP | 14482443 | 5.2514  | 9.0754  | -1.2518 |
| YRI | NPIP | 14487443 | 6.9784  | 9.5795  | -0.8098 |
| YRI | NPIP | 14492443 | 8.4234  | 11.0921 | -0.7246 |
| YRI | NPIP | 14497443 | 7.4136  | 10.924  | -0.9668 |
| YRI | NPIP | 14502443 | 4.587   | 6.5544  | -0.8674 |
| YRI | NPIP | 14507443 | 7.5169  | 8.4031  | -0.3115 |
| YRI | NPIP | 14512443 | 7.58    | 10.2518 | -0.7809 |
| YRI | NPIP | 14517443 | 5.469   | 7.8989  | -0.904  |
| YRI | NPIP | 14522443 | 6.291   | 7.7309  | -0.5463 |
| YRI | NPIP | 14527443 | 5.3434  | 7.7309  | -0.9059 |
| YRI | NPIP | 14532443 | 4.6594  | 7.2267  | -1.036  |
| YRI | NPIP | 14537443 | 4.7358  | 7.5628  | -1.0944 |
| YRI | NPIP | 14542443 | 5.1242  | 8.235   | -1.1138 |
| YRI | NPIP | 14547443 | 3.6449  | 6.5544  | -1.2827 |
| YRI | NPIP | 14552443 | 2.1481  | 5.2099  | -1.6573 |
| YRI | NPIP | 14557443 | 3.1315  | 7.3947  | -1.6846 |
| YRI | NPIP | 14562443 | 5.1993  | 9.0754  | -1.2688 |
| YRI | NPIP | 14567443 | 3.984   | 6.5544  | -1.1332 |
| YRI | NPIP | 14572443 | 2.9155  | 6.3864  | -1.5665 |
| YRI | NPIP | 14577443 | 2.9078  | 8.235   | -1.9074 |
| YRI | NPIP | 14582443 | 1.9688  | 7.5628  | -2.1656 |
| YRI | NPIP | 14587443 | 3.228   | 7.0586  | -1.5792 |
| YRI | NPIP | 14592443 | 3.9054  | 7.0586  | -1.2999 |
| YRI | NPIP | 14597443 | 4.5961  | 6.5544  | -0.8634 |
| YRI | NPIP | 14602443 | 3.7857  | 6.0502  | -1.0729 |
| YRI | NPIP | 14607443 | 1.9064  | 6.2183  | -1.9934 |
| YRI | NPIP | 14612443 | 2.0072  | 7.2267  | -2.1062 |
| YRI | NPIP | 14617443 | 2.3049  | 7.5628  | -2.0355 |
| YRI | NPIP | 14622443 | 3.8906  | 8.9073  | -1.6709 |
| YRI | NPIP | 14627443 | 4.3371  | 9.2434  | -1.579  |
| YRI | NPIP | 14632443 | 5.1961  | 8.7392  | -1.201  |

## 2\_TajimasD\_data

|     |      |          |        |        |         |
|-----|------|----------|--------|--------|---------|
| YRI | NPIP | 14637443 | 4.7882 | 8.9073 | -1.3719 |
| YRI | NPIP | 14642443 | 2.765  | 8.4031 | -1.9816 |
| YRI | NPIP | 14647443 | 3.3339 | 8.7392 | -1.8323 |
| YRI | NPIP | 14652443 | 3.4437 | 7.8989 | -1.6574 |
| YRI | NPIP | 14657443 | 3.3325 | 8.067  | -1.7276 |
| YRI | NPIP | 14662443 | 3.5648 | 9.4115 | -1.8504 |
| YRI | NPIP | 14667443 | 3.3771 | 9.2434 | -1.8879 |
| YRI | NPIP | 14672443 | 2.9984 | 7.8989 | -1.8231 |
| YRI | NPIP | 14677443 | 2.7261 | 7.0586 | -1.7861 |
| YRI | NPIP | 14682443 | 2.2973 | 6.5544 | -1.8769 |
| YRI | NPIP | 14687443 | 2.3565 | 7.7309 | -2.0392 |
| YRI | NPIP | 14692443 | 2.6376 | 9.4115 | -2.1439 |
| YRI | NPIP | 14697443 | 3.8368 | 8.4031 | -1.6049 |
| YRI | NPIP | 14702443 | 4.4223 | 8.7392 | -1.4633 |
| YRI | NPIP | 14707443 | 3.9685 | 9.4115 | -1.7227 |
| YRI | NPIP | 14712443 | 2.7929 | 7.8989 | -1.8995 |
| YRI | NPIP | 14717443 | 1.3039 | 8.067  | -2.4679 |
| YRI | NPIP | 14722443 | 1.0934 | 7.2267 | -2.4749 |
| YRI | NPIP | 14727443 | 1.9323 | 5.7141 | -1.8858 |
| YRI | NPIP | 14732443 | 2.6049 | 7.7309 | -1.9449 |
| YRI | NPIP | 14737443 | 3.1597 | 7.5628 | -1.7046 |
| YRI | NPIP | 14742443 | 2.8688 | 5.5461 | -1.371  |
| YRI | NPIP | 14747443 | 2.1012 | 7.3947 | -2.0917 |
| YRI | NPIP | 14752443 | 2.3279 | 8.9073 | -2.1913 |
| YRI | NPIP | 14757443 | 1.9719 | 7.2267 | -2.1204 |
| YRI | NPIP | 14762443 | 2.1364 | 8.067  | -2.1641 |
| YRI | NPIP | 14767443 | 1.9997 | 7.7309 | -2.1746 |
| YRI | NPIP | 14772443 | 2.4261 | 6.5544 | -1.8201 |
| YRI | NPIP | 14777443 | 3.7171 | 9.0754 | -1.754  |
| YRI | NPIP | 14782443 | 2.0887 | 6.0502 | -1.877  |
| YRI | NPIP | 14787443 | 0.037  | 0.6722 | -1.6629 |
| YRI | NPIP | 14792443 | 0      | 0      | 0       |
| YRI | NPIP | 14797443 | 0      | 0      | 0       |
| YRI | NPIP | 14802443 | 0      | 0      | 0       |
| YRI | NPIP | 14807443 | 0      | 0      | 0       |
| YRI | NPIP | 14812443 | 0      | 0      | 0       |
| YRI | NPIP | 14817443 | 0.1063 | 0.5042 | -1.2505 |
| YRI | NPIP | 14822443 | 0.4422 | 1.1764 | -1.3132 |
| YRI | NPIP | 14827443 | 0.3359 | 0.6722 | -0.8804 |
| YRI | NPIP | 14832443 | 0.1057 | 0.1681 | -0.3709 |
| YRI | NPIP | 14837443 | 0.1057 | 0.1681 | -0.3709 |
| YRI | NPIP | 14842443 | 0      | 0      | 0       |
| YRI | NPIP | 14847443 | 0.358  | 0.3361 | 0.0879  |
| YRI | NPIP | 14852443 | 0.358  | 0.3361 | 0.0879  |
| YRI | NPIP | 14857443 | 0.2118 | 0.8403 | -1.4196 |
| YRI | NPIP | 14862443 | 1.6827 | 4.8738 | -1.8318 |
| YRI | NPIP | 14867443 | 5.8325 | 7.7309 | -0.7203 |
| YRI | NPIP | 14872443 | 5.3415 | 5.7141 | -0.1858 |
| YRI | NPIP | 14877443 | 1.4132 | 2.689  | -1.2125 |

## 2\_TajimasD\_data

|     |      |          |        |         |         |
|-----|------|----------|--------|---------|---------|
| YRI | NPIP | 14882443 | 0.4702 | 1.0084  | -1.073  |
| YRI | NPIP | 14887443 | 0.3165 | 1.1764  | -1.538  |
| YRI | NPIP | 14892443 | 0.733  | 2.5209  | -1.7905 |
| YRI | NPIP | 14897443 | 2.2351 | 4.8738  | -1.5147 |
| YRI | NPIP | 14902443 | 2.738  | 5.0419  | -1.2837 |
| YRI | NPIP | 14907443 | 1.6238 | 5.2099  | -1.9411 |
| YRI | NPIP | 14912443 | 2.8798 | 5.8822  | -1.4589 |
| YRI | NPIP | 14917443 | 2.4785 | 5.0419  | -1.4282 |
| YRI | NPIP | 14922443 | 1.5765 | 6.0502  | -2.1197 |
| YRI | NPIP | 14927443 | 2.7261 | 6.3864  | -1.652  |
| YRI | NPIP | 14932443 | 2.1491 | 5.7141  | -1.7777 |
| YRI | NPIP | 14937443 | 1.5652 | 4.8738  | -1.8992 |
| YRI | NPIP | 14942443 | 1.8604 | 4.7057  | -1.6843 |
| YRI | NPIP | 14947443 | 2.3197 | 6.3864  | -1.8354 |
| YRI | NPIP | 14952443 | 1.5803 | 5.7141  | -2.0613 |
| YRI | NPIP | 14957443 | 2.5013 | 5.8822  | -1.6428 |
| YRI | NPIP | 14962443 | 3.52   | 8.4031  | -1.7162 |
| YRI | NPIP | 14967443 | 4.729  | 9.4115  | -1.482  |
| YRI | NPIP | 14972443 | 4.2791 | 7.2267  | -1.1894 |
| YRI | NPIP | 14977443 | 1.2973 | 5.5461  | -2.1758 |
| YRI | NPIP | 14982443 | 2.1987 | 6.7225  | -1.9493 |
| YRI | NPIP | 14987443 | 2.1389 | 6.0502  | -1.8532 |
| YRI | NPIP | 14992443 | 0.7104 | 4.3696  | -2.3105 |
| YRI | NPIP | 14997443 | 0.6076 | 2.5209  | -1.9161 |
| YRI | NPIP | 15002443 | 0.8027 | 1.3445  | -0.88   |
| YRI | NPIP | 15007443 | 0.6526 | 1.3445  | -1.1238 |
| YRI | NPIP | 15012443 | 0.411  | 2.5209  | -2.113  |
| YRI | NPIP | 15017443 | 1.9898 | 4.5377  | -1.5569 |
| YRI | NPIP | 15022443 | 3.6215 | 6.5544  | -1.293  |
| YRI | NPIP | 15027443 | 2.1372 | 5.0419  | -1.6184 |
| YRI | NPIP | 15032443 | 0.4942 | 3.0251  | -2.1833 |
| YRI | NPIP | 15037443 | 0.9518 | 2.689   | -1.651  |
| YRI | NPIP | 15042443 | 1.7609 | 2.689   | -0.882  |
| YRI | NPIP | 15047443 | 4.6387 | 8.4031  | -1.323  |
| YRI | NPIP | 15052443 | 8.4926 | 12.2685 | -0.9325 |
| YRI | NPIP | 15057443 | 9.2807 | 10.2518 | -0.2838 |
| YRI | NPIP | 15062443 | 5.863  | 8.067   | -0.8043 |
| YRI | NPIP | 15067443 | 3.0552 | 6.2183  | -1.4623 |
| YRI | NPIP | 15072443 | 4.5612 | 7.7309  | -1.2027 |
| YRI | NPIP | 15077443 | 5.864  | 9.4115  | -1.1228 |
| YRI | NPIP | 15082443 | 6.6149 | 10.4199 | -1.0953 |
| YRI | NPIP | 15087443 | 5.5692 | 9.4115  | -1.2161 |
| YRI | NPIP | 15092443 | 4.0304 | 7.7309  | -1.4041 |
| YRI | NPIP | 15097443 | 4.7809 | 8.067   | -1.1991 |
| YRI | NPIP | 15102443 | 4.8705 | 7.8989  | -1.1266 |
| YRI | NPIP | 15107443 | 5.0016 | 8.7392  | -1.2669 |
| YRI | NPIP | 15112443 | 4.589  | 10.0837 | -1.6309 |
| YRI | NPIP | 15117443 | 6.4292 | 12.2685 | -1.442  |
| YRI | NPIP | 15122443 | 6.4945 | 11.7644 | -1.3539 |

## 2\_TajimasD\_data

|     |      |          |         |         |         |
|-----|------|----------|---------|---------|---------|
| YRI | NPIP | 15127443 | 8.161   | 10.756  | -0.7252 |
| YRI | NPIP | 15132443 | 9.8329  | 11.2602 | -0.3821 |
| YRI | NPIP | 15137443 | 7.3968  | 10.756  | -0.9387 |
| YRI | NPIP | 15142443 | 6.2704  | 8.9073  | -0.8782 |
| YRI | NPIP | 15147443 | 5.6385  | 8.4031  | -0.9716 |
| YRI | NPIP | 15152443 | 7.3109  | 9.4115  | -0.6648 |
| YRI | NPIP | 15157443 | 7.6107  | 9.7476  | -0.6546 |
| YRI | NPIP | 15162443 | 5.9317  | 9.2434  | -1.0658 |
| YRI | NPIP | 15167443 | 6.2644  | 9.0754  | -0.9202 |
| YRI | NPIP | 15172443 | 7.4066  | 10.0837 | -0.7946 |
| YRI | NPIP | 15177443 | 7.3118  | 9.2434  | -0.6216 |
| YRI | NPIP | 15182443 | 5.5327  | 8.067   | -0.9248 |
| YRI | NPIP | 15187443 | 4.0752  | 7.5628  | -1.3502 |
| YRI | NPIP | 15192443 | 3.9526  | 8.067   | -1.5014 |
| YRI | NPIP | 15197443 | 4.4203  | 9.4115  | -1.5797 |
| YRI | NPIP | 15202443 | 5.3881  | 8.9073  | -1.1721 |
| YRI | NPIP | 15207443 | 3.764   | 5.2099  | -0.7826 |
| YRI | NPIP | 15212443 | 2.1279  | 3.6974  | -1.144  |
| YRI | NPIP | 15217443 | 6.3239  | 10.0837 | -1.116  |
| YRI | NPIP | 15222443 | 11.5078 | 18.4868 | -1.1663 |
| YRI | NPIP | 15227443 | 9.0108  | 16.4701 | -1.3925 |
| YRI | NPIP | 15232443 | 5.0567  | 11.0921 | -1.6386 |
| YRI | NPIP | 15237443 | 4.0692  | 10.4199 | -1.8282 |
| YRI | NPIP | 15242443 | 4.1713  | 9.7476  | -1.7082 |
| YRI | NPIP | 15247443 | 6.7431  | 9.4115  | -0.8445 |
| YRI | NPIP | 15252443 | 6.239   | 8.067   | -0.667  |
| YRI | NPIP | 15257443 | 3.2085  | 5.8822  | -1.2992 |
| YRI | NPIP | 15262443 | 3.6733  | 6.3864  | -1.2245 |
| YRI | NPIP | 15267443 | 3.5662  | 7.3947  | -1.5128 |
| YRI | NPIP | 15272443 | 3.1303  | 7.0586  | -1.6194 |
| YRI | NPIP | 15277443 | 4.0737  | 6.5544  | -1.0937 |
| YRI | NPIP | 15282443 | 3.9071  | 5.378   | -0.7741 |
| YRI | NPIP | 15287443 | 3.1658  | 5.378   | -1.1642 |
| YRI | NPIP | 15292443 | 2.4949  | 6.3864  | -1.7563 |
| YRI | NPIP | 15297443 | 5.3994  | 6.8906  | -0.6283 |
| YRI | NPIP | 15302443 | 5.8556  | 6.5544  | -0.3081 |
| YRI | NPIP | 15307443 | 3.7108  | 5.5461  | -0.9398 |
| YRI | NPIP | 15312443 | 5.1486  | 6.3864  | -0.5587 |
| YRI | NPIP | 15317443 | 4.066   | 6.2183  | -0.995  |
| YRI | NPIP | 15322443 | 6.6268  | 8.5712  | -0.671  |
| YRI | NPIP | 15327443 | 6.0776  | 6.7225  | -0.2779 |
| YRI | NPIP | 15332443 | 0.6835  | 0.8403  | -0.3542 |
| YRI | NPIP | 15337443 | 0.5508  | 2.5209  | -1.973  |
| YRI | NPIP | 15342443 | 0.5003  | 3.0251  | -2.178  |
| YRI | NPIP | 15347443 | 1.2004  | 3.0251  | -1.5741 |
| YRI | NPIP | 15352443 | 1.7452  | 3.3612  | -1.2767 |
| YRI | NPIP | 15357443 | 2.3249  | 4.0335  | -1.1561 |
| YRI | NPIP | 15362443 | 1.8368  | 4.8738  | -1.7433 |
| YRI | NPIP | 15367443 | 1.6676  | 5.378   | -1.9527 |

## 2\_TajimasD\_data

|     |      |          |        |         |         |
|-----|------|----------|--------|---------|---------|
| YRI | NPIP | 15372443 | 1.7017 | 4.3696  | -1.6846 |
| YRI | NPIP | 15377443 | 5.015  | 7.7309  | -1.0305 |
| YRI | NPIP | 15382443 | 7.7549 | 10.5879 | -0.8034 |
| YRI | NPIP | 15387443 | 3.7614 | 6.7225  | -1.2759 |
| YRI | NPIP | 15392443 | 4.5136 | 7.8989  | -1.2594 |
| YRI | NPIP | 15397443 | 6.329  | 9.5795  | -1.012  |
| YRI | NPIP | 15402443 | 4.5291 | 8.7392  | -1.4271 |
| YRI | NPIP | 15407443 | 5.0238 | 7.2267  | -0.8889 |
| YRI | NPIP | 15412443 | 6.9695 | 7.5628  | -0.2297 |
| YRI | NPIP | 15417443 | 5.206  | 7.3947  | -0.8649 |
| YRI | NPIP | 15422443 | 2.0358 | 4.3696  | -1.4736 |
| YRI | NPIP | 15427443 | 0.8056 | 2.3529  | -1.6379 |
| YRI | NPIP | 15432443 | 0.5354 | 2.3529  | -1.9239 |
| YRI | NPIP | 15437443 | 0.7802 | 2.8571  | -1.8782 |
| YRI | NPIP | 15442443 | 0.6867 | 2.8571  | -1.9628 |
| CEU | NPIP | 14868613 | 5.5071 | 6.3108  | -0.369  |
| CEU | NPIP | 14873613 | 2.8365 | 3.7524  | -0.6636 |
| CEU | NPIP | 14878613 | 0.8316 | 1.3645  | -0.8621 |
| CEU | NPIP | 14883613 | 1.0025 | 1.0234  | -0.0415 |
| CEU | NPIP | 14888613 | 0.8955 | 0.6822  | 0.557   |
| CEU | NPIP | 14893613 | 1.1235 | 2.0467  | -1.0985 |
| CEU | NPIP | 14898613 | 1.9105 | 3.4112  | -1.1787 |
| CEU | NPIP | 14903613 | 1.4057 | 3.5818  | -1.6401 |
| CEU | NPIP | 14908613 | 0.959  | 3.0701  | -1.8109 |
| CEU | NPIP | 14913613 | 1.8415 | 3.2407  | -1.1473 |
| CEU | NPIP | 14918613 | 1.1915 | 2.729   | -1.4533 |
| CEU | NPIP | 14923613 | 1.3785 | 2.3879  | -1.063  |
| CEU | NPIP | 14928613 | 2.2274 | 3.2407  | -0.8309 |
| CEU | NPIP | 14933613 | 1.7603 | 2.729   | -0.9156 |
| CEU | NPIP | 14938613 | 1.3983 | 2.2173  | -0.915  |
| CEU | NPIP | 14943613 | 1.7137 | 2.8996  | -1.0665 |
| CEU | NPIP | 14948613 | 1.8021 | 3.2407  | -1.1796 |
| CEU | NPIP | 14953613 | 1.4238 | 3.4112  | -1.5609 |
| CEU | NPIP | 14958613 | 2.2165 | 4.4346  | -1.3917 |
| CEU | NPIP | 14963613 | 4.5514 | 5.1169  | -0.313  |
| CEU | NPIP | 14968613 | 4.9604 | 4.9463  | 0.008   |
| CEU | NPIP | 14973613 | 2.2742 | 3.5818  | -0.9855 |
| CEU | NPIP | 14978613 | 1.0926 | 3.4112  | -1.8211 |
| CEU | NPIP | 14983613 | 1.4418 | 4.0935  | -1.7831 |
| CEU | NPIP | 14988613 | 0.8932 | 3.0701  | -1.8673 |
| CEU | NPIP | 14993613 | 0.652  | 3.0701  | -2.0742 |
| CEU | NPIP | 14998613 | 0.4651 | 1.8762  | -1.7966 |
| CEU | NPIP | 15003613 | 0.3436 | 0.5117  | -0.5272 |
| CEU | NPIP | 15008613 | 0.3537 | 0.6822  | -0.8578 |
| CEU | NPIP | 15013613 | 0.0998 | 0.8528  | -1.6957 |
| CEU | NPIP | 15018613 | 1.536  | 2.2173  | -0.7611 |
| CEU | NPIP | 15023613 | 2.3593 | 2.5584  | -0.1983 |
| CEU | NPIP | 15028613 | 1.4475 | 1.7056  | -0.3535 |
| CEU | NPIP | 15033613 | 0.9948 | 1.8762  | -1.1222 |



## 2\_TajimasD\_data

|     |      |          |         |         |         |
|-----|------|----------|---------|---------|---------|
| CEU | NPIP | 15038613 | 0.9192  | 1.8762  | -1.2184 |
| CEU | NPIP | 15043613 | 2.1816  | 2.729   | -0.5174 |
| CEU | NPIP | 15048613 | 4.6271  | 6.6519  | -0.8865 |
| CEU | NPIP | 15053613 | 6.5471  | 7.8459  | -0.4893 |
| CEU | NPIP | 15058613 | 7.0416  | 8.0164  | -0.36   |
| CEU | NPIP | 15063613 | 4.2443  | 6.9931  | -1.1501 |
| CEU | NPIP | 15068613 | 3.1884  | 5.2874  | -1.1286 |
| CEU | NPIP | 15073613 | 5.1938  | 5.9697  | -0.3745 |
| CEU | NPIP | 15078613 | 5.9079  | 7.6753  | -0.6793 |
| CEU | NPIP | 15083613 | 6.2954  | 8.6987  | -0.8234 |
| CEU | NPIP | 15088613 | 6.0394  | 6.9931  | -0.399  |
| CEU | NPIP | 15093613 | 4.8947  | 6.4814  | -0.7112 |
| CEU | NPIP | 15098613 | 4.035   | 6.4814  | -1.0965 |
| CEU | NPIP | 15103613 | 4.7776  | 7.3342  | -1.0244 |
| CEU | NPIP | 15108613 | 4.6226  | 6.6519  | -0.8885 |
| CEU | NPIP | 15113613 | 5.106   | 6.4814  | -0.6165 |
| CEU | NPIP | 15118613 | 6.5914  | 8.3576  | -0.6278 |
| CEU | NPIP | 15123613 | 6.7355  | 7.8459  | -0.4183 |
| CEU | NPIP | 15128613 | 10.6595 | 8.6987  | 0.6718  |
| CEU | NPIP | 15133613 | 12.6314 | 10.916  | 0.4758  |
| CEU | NPIP | 15138613 | 10.0023 | 9.3809  | 0.1985  |
| CEU | NPIP | 15143613 | 8.9555  | 6.9931  | 0.8211  |
| CEU | NPIP | 15148613 | 7.9149  | 6.4814  | 0.6425  |
| CEU | NPIP | 15153613 | 6.4381  | 7.5047  | -0.4185 |
| CEU | NPIP | 15158613 | 5.5991  | 6.4814  | -0.3955 |
| CEU | NPIP | 15163613 | 4.7982  | 4.6052  | 0.1172  |
| CEU | NPIP | 15168613 | 8.5584  | 8.187   | 0.1346  |
| CEU | NPIP | 15173613 | 9.7846  | 8.8692  | 0.308   |
| CEU | NPIP | 15178613 | 5.6741  | 6.4814  | -0.3618 |
| CEU | NPIP | 15183613 | 4.7365  | 6.6519  | -0.8386 |
| CEU | NPIP | 15188613 | 3.3253  | 5.7991  | -1.2253 |
| CEU | NPIP | 15193613 | 3.5477  | 7.1636  | -1.4802 |
| CEU | NPIP | 15198613 | 4.5927  | 6.9931  | -1.0044 |
| CEU | NPIP | 15203613 | 4.1066  | 5.2874  | -0.6349 |
| CEU | NPIP | 15208613 | 3.2564  | 4.4346  | -0.7392 |
| CEU | NPIP | 15213613 | 2.1156  | 3.0701  | -0.8188 |
| CEU | NPIP | 15218613 | 3.8359  | 7.5047  | -1.4395 |
| CEU | NPIP | 15223613 | 6.1971  | 11.5982 | -1.4151 |
| CEU | NPIP | 15228613 | 5.8705  | 9.0398  | -1.0478 |
| CEU | NPIP | 15233613 | 4.4976  | 7.3342  | -1.1365 |
| CEU | NPIP | 15238613 | 2.5413  | 7.6753  | -1.9734 |
| CEU | NPIP | 15243613 | 2.4012  | 5.2874  | -1.5519 |
| CEU | NPIP | 15248613 | 4.0832  | 5.1169  | -0.5722 |
| CEU | NPIP | 15253613 | 4.298   | 7.1636  | -1.173  |
| CEU | NPIP | 15258613 | 2.3789  | 5.1169  | -1.5155 |
| CEU | NPIP | 15263613 | 2.0359  | 4.2641  | -1.4464 |
| CEU | NPIP | 15268613 | 2.3346  | 4.9463  | -1.4895 |
| CEU | NPIP | 15273613 | 2.4199  | 3.7524  | -0.9654 |
| CEU | NPIP | 15278613 | 4.69    | 4.2641  | 0.2765  |

## 2\_TajimasD\_data

|     |      |          |         |         |         |
|-----|------|----------|---------|---------|---------|
| CEU | NPIP | 15283613 | 3.946   | 4.2641  | -0.2065 |
| CEU | NPIP | 15288613 | 1.6553  | 3.4112  | -1.3791 |
| CEU | NPIP | 15293613 | 2.2348  | 4.6052  | -1.4392 |
| CEU | NPIP | 15298613 | 6.0254  | 7.3342  | -0.5244 |
| CEU | NPIP | 15303613 | 5.3855  | 5.458   | -0.0379 |
| CEU | NPIP | 15308613 | 3.5677  | 2.729   | 0.7927  |
| CEU | NPIP | 15313613 | 7.0266  | 4.7757  | 1.3238  |
| CEU | NPIP | 15318613 | 5.7992  | 5.2874  | 0.2752  |
| CEU | NPIP | 15323613 | 6.2292  | 6.4814  | -0.113  |
| CEU | NPIP | 15328613 | 5.0552  | 4.6052  | 0.2732  |
| CEU | NPIP | 15333613 | 0.9027  | 1.5351  | -0.9377 |
| CEU | NPIP | 15338613 | 1.176   | 1.7056  | -0.7253 |
| CEU | NPIP | 15343613 | 0.7868  | 1.1939  | -0.7255 |
| CEU | NPIP | 15348613 | 0.9443  | 1.1939  | -0.4448 |
| CEU | NPIP | 15353613 | 2.1128  | 2.3879  | -0.2897 |
| CEU | NPIP | 15358613 | 2.9664  | 4.0935  | -0.7579 |
| CEU | NPIP | 15363613 | 1.8707  | 3.7524  | -1.3633 |
| CEU | NPIP | 15368613 | 2.1715  | 2.729   | -0.527  |
| CEU | NPIP | 15373613 | 3.3952  | 3.2407  | 0.1267  |
| CEU | NPIP | 15378613 | 6.6042  | 6.1402  | 0.2183  |
| CEU | NPIP | 15383613 | 8.4465  | 6.6519  | 0.7857  |
| CEU | NPIP | 15388613 | 5.7174  | 4.0935  | 1.092   |
| CEU | NPIP | 15393613 | 5.7217  | 5.9697  | -0.1197 |
| CEU | NPIP | 15398613 | 7.5296  | 8.6987  | -0.4005 |
| CEU | NPIP | 15403613 | 8.5586  | 7.3342  | 0.4906  |
| CEU | NPIP | 15408613 | 7.5143  | 5.6286  | 0.9592  |
| CEU | NPIP | 15413613 | 6.4168  | 5.6286  | 0.4009  |
| CEU | NPIP | 15418613 | 5.0689  | 5.2874  | -0.1175 |
| CEU | NPIP | 15423613 | 2.4247  | 3.0701  | -0.5536 |
| CEU | NPIP | 15428613 | 1.1657  | 1.7056  | -0.7395 |
| CEU | NPIP | 15433613 | 0.6226  | 1.3645  | -1.2002 |
| CEU | NPIP | 15438613 | 0.571   | 1.0234  | -0.8989 |
| CEU | NPIP | 15443613 | 1.8013  | 1.3645  | 0.7066  |
| CEU | NPIP | 15448613 | 2.5471  | 3.0701  | -0.4486 |
| CEU | NPIP | 15453613 | 2.3657  | 3.7524  | -1.0046 |
| CEU | NPIP | 15458613 | 2.726   | 3.2407  | -0.422  |
| CEU | NPIP | 15463613 | 4.2313  | 4.2641  | -0.0213 |
| CEU | NPIP | 15468613 | 6.1653  | 5.7991  | 0.1814  |
| CEU | NPIP | 15473613 | 6.4873  | 6.9931  | -0.2116 |
| CEU | NPIP | 15478613 | 5.4133  | 6.9931  | -0.661  |
| CEU | NPIP | 15483613 | 6.3137  | 6.9931  | -0.2843 |
| CEU | NPIP | 15488613 | 7.9695  | 7.6753  | 0.1131  |
| CEU | NPIP | 15493613 | 6.739   | 7.6753  | -0.3599 |
| CEU | NPIP | 15498613 | 8.1923  | 8.6987  | -0.1735 |
| CEU | NPIP | 15503613 | 9.0926  | 9.8926  | -0.2433 |
| CEU | NPIP | 15508613 | 8.8573  | 10.0632 | -0.3609 |
| CEU | NPIP | 15513613 | 11.9977 | 9.8926  | 0.6401  |
| CEU | NPIP | 15518613 | 12.2927 | 9.8926  | 0.7298  |
| CEU | NPIP | 15523613 | 7.5376  | 8.0164  | -0.1768 |

## 2\_TajimasD\_data

|     |      |          |        |        |         |
|-----|------|----------|--------|--------|---------|
| CEU | NPIP | 15528613 | 4.9375 | 5.7991 | -0.4267 |
| CEU | NPIP | 15533613 | 6.4306 | 6.8225 | -0.1677 |
| CEU | NPIP | 15538613 | 8.4768 | 7.6753 | 0.3081  |
| CEU | NPIP | 15543613 | 8.8369 | 7.1636 | 0.685   |
| CEU | NPIP | 15548613 | 7.3878 | 6.6519 | 0.3222  |
| CEU | NPIP | 15553613 | 8.7001 | 8.3576 | 0.1217  |
| CEU | NPIP | 15558613 | 6.5931 | 7.6753 | -0.416  |
| CEU | NPIP | 15563613 | 4.3772 | 6.1402 | -0.8296 |
| CEU | NPIP | 15568613 | 3.6823 | 6.3108 | -1.2068 |
| CEU | NPIP | 15573613 | 3.2713 | 5.9697 | -1.3023 |
| CEU | NPIP | 15578613 | 3.5428 | 5.458  | -1.0012 |
| CEU | NPIP | 15583613 | 3.2884 | 4.4346 | -0.7192 |
| CEU | NPIP | 15588613 | 3.241  | 3.5818 | -0.2569 |
| CEU | NPIP | 15593613 | 4.7287 | 5.6286 | -0.4577 |
| CEU | NPIP | 15598613 | 7.8273 | 8.3576 | -0.1885 |
| CEU | NPIP | 15603613 | 5.3335 | 6.1402 | -0.3796 |
| CEU | NPIP | 15608613 | 4.3105 | 5.9697 | -0.8008 |
| CEU | NPIP | 15613613 | 5.3007 | 6.6519 | -0.5916 |
| CEU | NPIP | 15618613 | 3.4293 | 4.7757 | -0.7919 |
| CEU | NPIP | 15623613 | 4.9685 | 5.2874 | -0.1715 |
| CEU | NPIP | 15628613 | 7.0196 | 5.6286 | 0.7075  |
| CEU | NPIP | 15633613 | 4.2072 | 4.4346 | -0.1427 |
| CEU | NPIP | 15638613 | 3.2604 | 5.1169 | -1.0276 |
| CEU | NPIP | 15643613 | 3.8648 | 6.1402 | -1.0707 |
| CEU | NPIP | 15648613 | 2.907  | 4.2641 | -0.881  |
| CEU | NPIP | 15653613 | 2.6533 | 3.0701 | -0.3575 |
| CEU | NPIP | 15658613 | 3.1853 | 4.4346 | -0.7839 |
| CEU | NPIP | 15663613 | 3.5446 | 6.6519 | -1.3604 |
| CEU | NPIP | 15668613 | 3.1288 | 8.0164 | -1.8053 |
| CEU | NPIP | 15673613 | 2.7755 | 8.187  | -1.9605 |
| CEU | NPIP | 15678613 | 3.898  | 7.5047 | -1.4151 |
| CEU | NPIP | 15683613 | 7.7469 | 8.5281 | -0.2726 |
| CEU | NPIP | 15688613 | 5.6848 | 5.7991 | -0.0566 |
| CEU | NPIP | 15693613 | 3.5702 | 3.9229 | -0.246  |
| CEU | NPIP | 15698613 | 5.3857 | 8.0164 | -0.9717 |
| CEU | NPIP | 15703613 | 6.1175 | 8.3576 | -0.7963 |
| CEU | NPIP | 15708613 | 4.6974 | 5.6286 | -0.4737 |
| CEU | NPIP | 15713613 | 2.442  | 5.458  | -1.5767 |
| CEU | NPIP | 15718613 | 3.2973 | 6.9931 | -1.5464 |
| CEU | NPIP | 15723613 | 4.456  | 7.3342 | -1.1532 |
| CEU | NPIP | 15728613 | 3.9128 | 5.6286 | -0.8728 |
| CEU | NPIP | 15733613 | 3.3117 | 4.2641 | -0.6182 |
| CEU | NPIP | 15738613 | 3.5065 | 4.9463 | -0.8211 |
| CEU | NPIP | 15743613 | 3.5207 | 5.2874 | -0.95   |
| CEU | NPIP | 15748613 | 3.7633 | 5.9697 | -1.0648 |
| CEU | NPIP | 15753613 | 4.6184 | 8.3576 | -1.3292 |
| CEU | NPIP | 15758613 | 8.545  | 9.2104 | -0.2162 |
| CEU | NPIP | 15763613 | 9.2117 | 8.0164 | 0.4415  |
| CEU | NPIP | 15768613 | 6.9903 | 8.3576 | -0.486  |

## 2\_TajimasD\_data

|     |      |          |         |         |         |
|-----|------|----------|---------|---------|---------|
| CEU | NPIP | 15773613 | 5.7452  | 8.5281  | -0.971  |
| CEU | NPIP | 15778613 | 4.384   | 6.9931  | -1.0917 |
| CEU | NPIP | 15783613 | 6.9293  | 7.8459  | -0.3453 |
| CEU | NPIP | 15788613 | 9.0992  | 9.7221  | -0.1925 |
| CEU | NPIP | 15793613 | 8.2531  | 10.5749 | -0.6634 |
| CEU | NPIP | 15798613 | 7.8058  | 10.0632 | -0.6756 |
| CEU | NPIP | 15803613 | 7.6481  | 9.7221  | -0.6409 |
| CEU | NPIP | 15808613 | 7.0074  | 9.5515  | -0.7993 |
| CEU | NPIP | 15813613 | 6.8081  | 8.6987  | -0.6477 |
| CEU | NPIP | 15818613 | 6.9487  | 9.2104  | -0.7349 |
| CEU | NPIP | 15823613 | 5.5859  | 8.0164  | -0.8977 |
| CEU | NPIP | 15828613 | 3.6865  | 6.1402  | -1.1546 |
| CEU | NPIP | 15833613 | 5.1742  | 6.8225  | -0.7053 |
| CEU | NPIP | 15838613 | 6.576   | 7.6753  | -0.4225 |
| CEU | NPIP | 15843613 | 7.1055  | 7.6753  | -0.219  |
| CEU | NPIP | 15848613 | 7.4595  | 8.5281  | -0.3728 |
| CEU | NPIP | 15853613 | 3.8176  | 7.3342  | -1.409  |
| CEU | NPIP | 15858613 | 5.6953  | 6.8225  | -0.4823 |
| CEU | NPIP | 15863613 | 10.6745 | 9.2104  | 0.4758  |
| CEU | NPIP | 15868613 | 15.1835 | 12.1099 | 0.7732  |
| CEU | NPIP | 15873613 | 13.8592 | 11.4277 | 0.646   |
| CHB | NPIP | 14868613 | 6.6874  | 6.6072  | 0.0352  |
| CHB | NPIP | 14873613 | 4.2077  | 3.7271  | 0.3491  |
| CHB | NPIP | 14878613 | 1.0525  | 1.1859  | -0.2381 |
| CHB | NPIP | 14883613 | 0.7087  | 0.8471  | -0.3121 |
| CHB | NPIP | 14888613 | 0.1989  | 0.6777  | -1.2517 |
| CHB | NPIP | 14893613 | 0.9101  | 2.5412  | -1.6288 |
| CHB | NPIP | 14898613 | 1.9823  | 2.5412  | -0.5581 |
| CHB | NPIP | 14903613 | 1.3642  | 1.1859  | 0.3183  |
| CHB | NPIP | 14908613 | 1.4064  | 1.6942  | -0.395  |
| CHB | NPIP | 14913613 | 2.4626  | 1.8636  | 0.7642  |
| CHB | NPIP | 14918613 | 1.4253  | 2.033   | -0.7247 |
| CHB | NPIP | 14923613 | 1.2376  | 2.2024  | -1.0803 |
| CHB | NPIP | 14928613 | 1.8285  | 3.0495  | -1.0501 |
| CHB | NPIP | 14933613 | 1.7436  | 3.0495  | -1.1231 |
| CHB | NPIP | 14938613 | 1.0952  | 2.2024  | -1.2398 |
| CHB | NPIP | 14943613 | 1.5353  | 2.5412  | -1.0045 |
| CHB | NPIP | 14948613 | 2.2267  | 3.2189  | -0.8157 |
| CHB | NPIP | 14953613 | 0.8273  | 2.8801  | -1.8508 |
| CHB | NPIP | 14958613 | 1.3649  | 3.5577  | -1.6572 |
| CHB | NPIP | 14963613 | 4.984   | 5.2519  | -0.1445 |
| CHB | NPIP | 14968613 | 5.7476  | 5.0825  | 0.3693  |
| CHB | NPIP | 14973613 | 2.6924  | 4.913   | -1.2702 |
| CHB | NPIP | 14978613 | 2.0524  | 4.5742  | -1.5356 |
| CHB | NPIP | 14983613 | 2.5349  | 3.7271  | -0.8661 |
| CHB | NPIP | 14988613 | 1.1727  | 2.7106  | -1.4572 |
| CHB | NPIP | 14993613 | 0.7394  | 2.3718  | -1.7231 |
| CHB | NPIP | 14998613 | 0.6908  | 1.5247  | -1.2389 |
| CHB | NPIP | 15003613 | 0.7936  | 0.6777  | 0.303   |

## 2\_TajimasD\_data

|     |      |          |         |         |         |
|-----|------|----------|---------|---------|---------|
| CHB | NPIP | 15008613 | 0.7936  | 0.6777  | 0.303   |
| CHB | NPIP | 15013613 | 0.1043  | 0.6777  | -1.499  |
| CHB | NPIP | 15018613 | 1.6682  | 1.6942  | -0.0357 |
| CHB | NPIP | 15023613 | 2.9482  | 3.2189  | -0.2226 |
| CHB | NPIP | 15028613 | 1.7489  | 3.0495  | -1.1185 |
| CHB | NPIP | 15033613 | 0.4892  | 1.6942  | -1.6537 |
| CHB | NPIP | 15038613 | 0.5711  | 1.0165  | -0.8864 |
| CHB | NPIP | 15043613 | 2.7683  | 3.2189  | -0.3705 |
| CHB | NPIP | 15048613 | 5.9299  | 6.6072  | -0.2975 |
| CHB | NPIP | 15053613 | 6.6412  | 7.4543  | -0.3201 |
| CHB | NPIP | 15058613 | 7.1243  | 7.4543  | -0.1299 |
| CHB | NPIP | 15063613 | 5.1868  | 6.4378  | -0.5625 |
| CHB | NPIP | 15068613 | 3.4152  | 5.2519  | -0.9906 |
| CHB | NPIP | 15073613 | 5.3217  | 5.7601  | -0.2178 |
| CHB | NPIP | 15078613 | 5.584   | 6.4378  | -0.3839 |
| CHB | NPIP | 15083613 | 5.6794  | 6.4378  | -0.341  |
| CHB | NPIP | 15088613 | 6.2294  | 6.6072  | -0.1659 |
| CHB | NPIP | 15093613 | 5.1114  | 6.4378  | -0.5964 |
| CHB | NPIP | 15098613 | 4.2901  | 6.6072  | -1.0177 |
| CHB | NPIP | 15103613 | 4.6238  | 6.6072  | -0.8711 |
| CHB | NPIP | 15108613 | 4.5494  | 5.9295  | -0.6681 |
| CHB | NPIP | 15113613 | 5.6587  | 5.7601  | -0.0504 |
| CHB | NPIP | 15118613 | 6.1523  | 5.5907  | 0.2865  |
| CHB | NPIP | 15123613 | 6.2829  | 5.7601  | 0.2597  |
| CHB | NPIP | 15128613 | 11.8557 | 8.3013  | 1.2677  |
| CHB | NPIP | 15133613 | 14.2903 | 10.3343 | 1.1515  |
| CHB | NPIP | 15138613 | 10.8721 | 8.3013  | 0.9169  |
| CHB | NPIP | 15143613 | 10.2166 | 6.7766  | 1.4767  |
| CHB | NPIP | 15148613 | 8.4049  | 6.0989  | 1.0885  |
| CHB | NPIP | 15153613 | 7.1788  | 7.1154  | 0.026   |
| CHB | NPIP | 15158613 | 7.134   | 6.6072  | 0.2314  |
| CHB | NPIP | 15163613 | 5.5102  | 5.5907  | -0.0411 |
| CHB | NPIP | 15168613 | 9.7592  | 7.9625  | 0.6658  |
| CHB | NPIP | 15173613 | 10.6088 | 8.1319  | 0.9003  |
| CHB | NPIP | 15178613 | 5.9438  | 6.2684  | -0.1495 |
| CHB | NPIP | 15183613 | 5.4641  | 6.0989  | -0.2997 |
| CHB | NPIP | 15188613 | 3.9655  | 5.0825  | -0.6201 |
| CHB | NPIP | 15193613 | 4.1043  | 5.7601  | -0.8226 |
| CHB | NPIP | 15198613 | 4.9402  | 6.4378  | -0.6734 |
| CHB | NPIP | 15203613 | 4.3743  | 4.4048  | -0.0192 |
| CHB | NPIP | 15208613 | 4.0695  | 3.5577  | 0.3868  |
| CHB | NPIP | 15213613 | 2.8544  | 2.7106  | 0.1363  |
| CHB | NPIP | 15218613 | 5.9996  | 6.946   | -0.3973 |
| CHB | NPIP | 15223613 | 10.2427 | 11.6896 | -0.3752 |
| CHB | NPIP | 15228613 | 7.8353  | 8.4708  | -0.2225 |
| CHB | NPIP | 15233613 | 5.1538  | 7.4543  | -0.9055 |
| CHB | NPIP | 15238613 | 3.2545  | 7.9625  | -1.7446 |
| CHB | NPIP | 15243613 | 2.5717  | 5.4213  | -1.4942 |
| CHB | NPIP | 15248613 | 5.9766  | 6.946   | -0.4069 |

## 2\_TajimasD\_data

|     |      |          |        |        |         |
|-----|------|----------|--------|--------|---------|
| CHB | NPIP | 15253613 | 5.5092 | 7.1154 | -0.6596 |
| CHB | NPIP | 15258613 | 2.2934 | 4.5742 | -1.3888 |
| CHB | NPIP | 15263613 | 3.3328 | 5.0825 | -0.9714 |
| CHB | NPIP | 15268613 | 3.9446 | 5.5907 | -0.8399 |
| CHB | NPIP | 15273613 | 3.8559 | 5.7601 | -0.9461 |
| CHB | NPIP | 15278613 | 5.5921 | 6.0989 | -0.2392 |
| CHB | NPIP | 15283613 | 4.2441 | 4.4048 | -0.1011 |
| CHB | NPIP | 15288613 | 1.6849 | 3.5577 | -1.4154 |
| CHB | NPIP | 15293613 | 2.1218 | 4.5742 | -1.4933 |
| CHB | NPIP | 15298613 | 7.4409 | 7.1154 | 0.1337  |
| CHB | NPIP | 15303613 | 6.5149 | 4.913  | 0.9163  |
| CHB | NPIP | 15308613 | 4.174  | 3.0495 | 0.9671  |
| CHB | NPIP | 15313613 | 7.5287 | 5.7601 | 0.8787  |
| CHB | NPIP | 15318613 | 5.7925 | 5.0825 | 0.3942  |
| CHB | NPIP | 15323613 | 6.8163 | 5.2519 | 0.8437  |
| CHB | NPIP | 15328613 | 5.1807 | 4.066  | 0.7517  |
| CHB | NPIP | 15333613 | 0.7263 | 1.5247 | -1.1861 |
| CHB | NPIP | 15338613 | 1.2635 | 1.8636 | -0.7656 |
| CHB | NPIP | 15343613 | 0.6145 | 1.1859 | -1.0199 |
| CHB | NPIP | 15348613 | 1.0602 | 1.1859 | -0.2244 |
| CHB | NPIP | 15353613 | 2.2254 | 2.2024 | 0.0258  |
| CHB | NPIP | 15358613 | 2.3566 | 3.2189 | -0.7089 |
| CHB | NPIP | 15363613 | 1.3158 | 3.3883 | -1.6321 |
| CHB | NPIP | 15368613 | 2.0482 | 3.5577 | -1.1408 |
| CHB | NPIP | 15373613 | 2.6585 | 3.0495 | -0.3363 |
| CHB | NPIP | 15378613 | 5.1186 | 4.913  | 0.1176  |
| CHB | NPIP | 15383613 | 6.9382 | 6.4378 | 0.225   |
| CHB | NPIP | 15388613 | 4.5731 | 4.066  | 0.342   |
| CHB | NPIP | 15393613 | 5.862  | 4.7436 | 0.6597  |
| CHB | NPIP | 15398613 | 6.7836 | 6.4378 | 0.1555  |
| CHB | NPIP | 15403613 | 5.8863 | 6.4378 | -0.248  |
| CHB | NPIP | 15408613 | 5.5167 | 5.9295 | -0.1998 |
| CHB | NPIP | 15413613 | 5.8894 | 5.4213 | 0.2455  |
| CHB | NPIP | 15418613 | 4.5212 | 4.4048 | 0.0732  |
| CHB | NPIP | 15423613 | 1.9855 | 2.2024 | -0.2429 |
| CHB | NPIP | 15428613 | 1.4466 | 1.0165 | 0.8559  |
| CHB | NPIP | 15433613 | 0.692  | 0.6777 | 0.0374  |
| CHB | NPIP | 15438613 | 0.4805 | 0.6777 | -0.5155 |
| CHB | NPIP | 15443613 | 1.4201 | 1.1859 | 0.418   |
| CHB | NPIP | 15448613 | 2.6162 | 2.3718 | 0.258   |
| CHB | NPIP | 15453613 | 2.9471 | 3.2189 | -0.2235 |
| CHB | NPIP | 15458613 | 2.5831 | 3.2189 | -0.5227 |
| CHB | NPIP | 15463613 | 4.1984 | 3.5577 | 0.4842  |
| CHB | NPIP | 15468613 | 6.6669 | 4.066  | 1.7539  |
| CHB | NPIP | 15473613 | 6.9107 | 5.4213 | 0.781   |
| CHB | NPIP | 15478613 | 6.3461 | 6.0989 | 0.1167  |
| CHB | NPIP | 15483613 | 8.625  | 6.2684 | 1.0854  |
| CHB | NPIP | 15488613 | 10.989 | 6.946  | 1.6971  |
| CHB | NPIP | 15493613 | 8.3368 | 6.946  | 0.5838  |

## 2\_TajimasD\_data

|     |      |          |         |         |         |
|-----|------|----------|---------|---------|---------|
| CHB | NPIP | 15498613 | 9.4894  | 10.6731 | -0.3343 |
| CHB | NPIP | 15503613 | 9.8679  | 10.1649 | -0.0878 |
| CHB | NPIP | 15508613 | 9.522   | 9.1484  | 0.1218  |
| CHB | NPIP | 15513613 | 12.2601 | 11.1814 | 0.2917  |
| CHB | NPIP | 15518613 | 12.4227 | 10.5037 | 0.5502  |
| CHB | NPIP | 15523613 | 8.4358  | 8.4708  | -0.0123 |
| CHB | NPIP | 15528613 | 4.8685  | 7.6237  | -1.0625 |
| CHB | NPIP | 15533613 | 4.482   | 8.6402  | -1.4293 |
| CHB | NPIP | 15538613 | 6.1713  | 9.1484  | -0.9706 |
| CHB | NPIP | 15543613 | 7.5722  | 8.8096  | -0.4178 |
| CHB | NPIP | 15548613 | 6.4894  | 7.4543  | -0.3798 |
| CHB | NPIP | 15553613 | 9.0426  | 7.9625  | 0.4003  |
| CHB | NPIP | 15558613 | 7.4883  | 6.6072  | 0.387   |
| CHB | NPIP | 15563613 | 4.6267  | 4.913   | -0.1638 |
| CHB | NPIP | 15568613 | 3.6863  | 5.5907  | -0.9717 |
| CHB | NPIP | 15573613 | 2.9221  | 6.4378  | -1.5808 |
| CHB | NPIP | 15578613 | 3.3785  | 6.0989  | -1.2841 |
| CHB | NPIP | 15583613 | 4.3432  | 6.4378  | -0.9418 |
| CHB | NPIP | 15588613 | 4.1382  | 6.0989  | -0.9255 |
| CHB | NPIP | 15593613 | 5.5037  | 6.0989  | -0.281  |
| CHB | NPIP | 15598613 | 9.6627  | 7.7931  | 0.7066  |
| CHB | NPIP | 15603613 | 7.0177  | 8.8096  | -0.605  |
| CHB | NPIP | 15608613 | 5.8273  | 10.6731 | -1.3686 |
| CHB | NPIP | 15613613 | 7.2363  | 10.6731 | -0.9707 |
| CHB | NPIP | 15618613 | 4.9259  | 10.1649 | -1.5487 |
| CHB | NPIP | 15623613 | 6.436   | 11.012  | -1.2552 |
| CHB | NPIP | 15628613 | 8.8289  | 9.3178  | -0.1567 |
| CHB | NPIP | 15633613 | 5.3781  | 6.4378  | -0.4765 |
| CHB | NPIP | 15638613 | 5.0067  | 6.946   | -0.814  |
| CHB | NPIP | 15643613 | 6.0543  | 9.3178  | -1.0461 |
| CHB | NPIP | 15648613 | 4.343   | 8.4708  | -1.445  |
| CHB | NPIP | 15653613 | 4.4118  | 6.946   | -1.0638 |
| CHB | NPIP | 15658613 | 5.0247  | 7.1154  | -0.8586 |
| CHB | NPIP | 15663613 | 4.8812  | 9.1484  | -1.3913 |
| CHB | NPIP | 15668613 | 4.9269  | 10.8426 | -1.6464 |
| CHB | NPIP | 15673613 | 4.0187  | 10.1649 | -1.8169 |
| CHB | NPIP | 15678613 | 3.747   | 8.1319  | -1.5938 |
| CHB | NPIP | 15683613 | 8.0807  | 8.8096  | -0.2461 |
| CHB | NPIP | 15688613 | 6.6752  | 9.3178  | -0.8471 |
| CHB | NPIP | 15693613 | 4.0417  | 8.6402  | -1.5807 |
| CHB | NPIP | 15698613 | 4.668   | 8.8096  | -1.3983 |
| CHB | NPIP | 15703613 | 5.3552  | 9.3178  | -1.2702 |
| CHB | NPIP | 15708613 | 5.4428  | 9.3178  | -1.2421 |
| CHB | NPIP | 15713613 | 3.0461  | 7.4543  | -1.7352 |
| CHB | NPIP | 15718613 | 3.1772  | 7.2848  | -1.6511 |
| CHB | NPIP | 15723613 | 4.4776  | 7.6237  | -1.2132 |
| CHB | NPIP | 15728613 | 4.9345  | 6.4378  | -0.6759 |
| CHB | NPIP | 15733613 | 5.3278  | 6.946   | -0.6793 |
| CHB | NPIP | 15738613 | 5.9282  | 7.9625  | -0.7538 |

## 2\_TajimasD\_data

|     |      |          |         |         |         |
|-----|------|----------|---------|---------|---------|
| CHB | NPIP | 15743613 | 5.6996  | 8.6402  | -1.0108 |
| CHB | NPIP | 15748613 | 4.696   | 7.7931  | -1.1705 |
| CHB | NPIP | 15753613 | 4.6836  | 7.9625  | -1.2151 |
| CHB | NPIP | 15758613 | 8.3328  | 9.6567  | -0.4105 |
| CHB | NPIP | 15763613 | 8.5686  | 9.6567  | -0.3374 |
| CHB | NPIP | 15768613 | 7.1639  | 9.8261  | -0.8122 |
| CHB | NPIP | 15773613 | 6.4864  | 8.8096  | -0.7844 |
| CHB | NPIP | 15778613 | 4.1392  | 6.6072  | -1.084  |
| CHB | NPIP | 15783613 | 6.335   | 7.4543  | -0.4406 |
| CHB | NPIP | 15788613 | 9.0714  | 11.3508 | -0.6077 |
| CHB | NPIP | 15793613 | 9.2336  | 12.7061 | -0.8324 |
| CHB | NPIP | 15798613 | 8.0836  | 10.6731 | -0.7314 |
| CHB | NPIP | 15803613 | 8.1949  | 12.1979 | -0.9973 |
| CHB | NPIP | 15808613 | 7.4514  | 13.892  | -1.4189 |
| CHB | NPIP | 15813613 | 7.3973  | 11.8591 | -1.1415 |
| CHB | NPIP | 15818613 | 7.8858  | 10.5037 | -0.7505 |
| CHB | NPIP | 15823613 | 6.139   | 9.4872  | -1.0554 |
| CHB | NPIP | 15828613 | 4.522   | 7.6237  | -1.1961 |
| CHB | NPIP | 15833613 | 5.2905  | 5.5907  | -0.1532 |
| CHB | NPIP | 15838613 | 7.495   | 7.7931  | -0.1127 |
| CHB | NPIP | 15843613 | 9.5633  | 10.1649 | -0.1778 |
| CHB | NPIP | 15848613 | 10.3512 | 9.8261  | 0.1602  |
| CHB | NPIP | 15853613 | 6.2119  | 8.4708  | -0.7908 |
| CHB | NPIP | 15858613 | 6.8626  | 8.8096  | -0.6574 |
| CHB | NPIP | 15863613 | 12.0156 | 10.5037 | 0.4335  |
| CHB | NPIP | 15868613 | 16.7611 | 12.5367 | 1.0256  |
| CHB | NPIP | 15873613 | 15.6101 | 13.2144 | 0.5534  |
| YRI | NPIP | 14868613 | 6.3444  | 8.067   | -0.6286 |
| YRI | NPIP | 14873613 | 4.2863  | 4.8738  | -0.3372 |
| YRI | NPIP | 14878613 | 0.837   | 1.6806  | -1.1605 |
| YRI | NPIP | 14883613 | 0.6398  | 1.0084  | -0.7349 |
| YRI | NPIP | 14888613 | 0.3258  | 1.1764  | -1.5213 |
| YRI | NPIP | 14893613 | 1.3857  | 3.0251  | -1.4142 |
| YRI | NPIP | 14898613 | 2.2977  | 5.0419  | -1.529  |
| YRI | NPIP | 14903613 | 1.9512  | 4.5377  | -1.5805 |
| YRI | NPIP | 14908613 | 2.5386  | 5.378   | -1.4943 |
| YRI | NPIP | 14913613 | 2.8532  | 5.8822  | -1.4718 |
| YRI | NPIP | 14918613 | 1.5099  | 4.7057  | -1.8918 |
| YRI | NPIP | 14923613 | 1.9926  | 6.0502  | -1.9225 |
| YRI | NPIP | 14928613 | 2.8727  | 7.5628  | -1.8157 |
| YRI | NPIP | 14933613 | 2.1584  | 5.7141  | -1.7731 |
| YRI | NPIP | 14938613 | 1.3914  | 3.5293  | -1.621  |
| YRI | NPIP | 14943613 | 1.8036  | 5.0419  | -1.8043 |
| YRI | NPIP | 14948613 | 2.3656  | 6.7225  | -1.8774 |
| YRI | NPIP | 14953613 | 1.4512  | 5.7141  | -2.1257 |
| YRI | NPIP | 14958613 | 2.6928  | 6.8906  | -1.7688 |
| YRI | NPIP | 14963613 | 5.0439  | 10.2518 | -1.5221 |
| YRI | NPIP | 14968613 | 4.6282  | 8.9073  | -1.4252 |
| YRI | NPIP | 14973613 | 2.7073  | 5.7141  | -1.4994 |



## 2\_TajimasD\_data

|     |      |          |        |         |         |
|-----|------|----------|--------|---------|---------|
| YRI | NPIP | 14978613 | 1.7588 | 5.7141  | -1.9723 |
| YRI | NPIP | 14983613 | 2.0621 | 6.5544  | -1.9806 |
| YRI | NPIP | 14988613 | 1.55   | 5.2099  | -1.981  |
| YRI | NPIP | 14993613 | 0.8957 | 4.2016  | -2.1595 |
| YRI | NPIP | 14998613 | 0.5983 | 2.3529  | -1.8573 |
| YRI | NPIP | 15003613 | 0.5258 | 0.6722  | -0.3833 |
| YRI | NPIP | 15008613 | 0.7435 | 1.6806  | -1.2892 |
| YRI | NPIP | 15013613 | 0.5284 | 3.1932  | -2.1977 |
| YRI | NPIP | 15018613 | 2.6625 | 5.5461  | -1.4767 |
| YRI | NPIP | 15023613 | 3.5041 | 5.8822  | -1.1555 |
| YRI | NPIP | 15028613 | 1.3829 | 3.8654  | -1.7421 |
| YRI | NPIP | 15033613 | 0.4942 | 3.0251  | -2.1833 |
| YRI | NPIP | 15038613 | 1.0689 | 3.1932  | -1.752  |
| YRI | NPIP | 15043613 | 2.5985 | 4.5377  | -1.1849 |
| YRI | NPIP | 15048613 | 6.5775 | 9.7476  | -0.9711 |
| YRI | NPIP | 15053613 | 9.338  | 11.9324 | -0.6577 |
| YRI | NPIP | 15058613 | 7.9554 | 9.7476  | -0.549  |
| YRI | NPIP | 15063613 | 4.1893 | 6.7225  | -1.0916 |
| YRI | NPIP | 15068613 | 2.9389 | 5.8822  | -1.4302 |
| YRI | NPIP | 15073613 | 5.2916 | 8.235   | -1.0539 |
| YRI | NPIP | 15078613 | 5.7925 | 9.7476  | -1.2116 |
| YRI | NPIP | 15083613 | 5.9028 | 10.0837 | -1.241  |
| YRI | NPIP | 15088613 | 5.6255 | 9.2434  | -1.1643 |
| YRI | NPIP | 15093613 | 4.2625 | 8.067   | -1.3883 |
| YRI | NPIP | 15098613 | 4.3377 | 8.067   | -1.3608 |
| YRI | NPIP | 15103613 | 5.4972 | 8.5712  | -1.0608 |
| YRI | NPIP | 15108613 | 5.0337 | 8.7392  | -1.2561 |
| YRI | NPIP | 15113613 | 5.0267 | 10.0837 | -1.501  |
| YRI | NPIP | 15118613 | 6.6785 | 12.7727 | -1.4488 |
| YRI | NPIP | 15123613 | 6.4632 | 11.5963 | -1.3367 |
| YRI | NPIP | 15128613 | 8.5878 | 10.0837 | -0.444  |
| YRI | NPIP | 15133613 | 9.7173 | 11.2602 | -0.413  |
| YRI | NPIP | 15138613 | 7.1154 | 10.756  | -1.0174 |
| YRI | NPIP | 15143613 | 6.7214 | 9.0754  | -0.7706 |
| YRI | NPIP | 15148613 | 6.1259 | 8.5712  | -0.8439 |
| YRI | NPIP | 15153613 | 6.6917 | 9.9157  | -0.972  |
| YRI | NPIP | 15158613 | 6.6226 | 9.0754  | -0.8029 |
| YRI | NPIP | 15163613 | 5.05   | 8.4031  | -1.1785 |
| YRI | NPIP | 15168613 | 8.6178 | 10.5879 | -0.5587 |
| YRI | NPIP | 15173613 | 9.0562 | 10.2518 | -0.3494 |
| YRI | NPIP | 15178613 | 5.1121 | 8.7392  | -1.2295 |
| YRI | NPIP | 15183613 | 4.857  | 8.4031  | -1.2463 |
| YRI | NPIP | 15188613 | 3.8671 | 6.5544  | -1.1848 |
| YRI | NPIP | 15193613 | 4.1269 | 9.2434  | -1.6466 |
| YRI | NPIP | 15198613 | 4.5024 | 9.4115  | -1.5537 |
| YRI | NPIP | 15203613 | 4.1128 | 6.2183  | -0.9734 |
| YRI | NPIP | 15208613 | 4.1688 | 5.0419  | -0.4865 |
| YRI | NPIP | 15213613 | 2.9807 | 5.0419  | -1.1484 |
| YRI | NPIP | 15218613 | 7.4114 | 11.7644 | -1.1183 |

## 2\_TajimasD\_data

|     |      |          |         |         |         |
|-----|------|----------|---------|---------|---------|
| YRI | NPIP | 15223613 | 10.9856 | 18.991  | -1.3037 |
| YRI | NPIP | 15228613 | 7.3994  | 14.2853 | -1.4723 |
| YRI | NPIP | 15233613 | 5.7392  | 10.2518 | -1.3189 |
| YRI | NPIP | 15238613 | 4.2244  | 11.5963 | -1.9197 |
| YRI | NPIP | 15243613 | 3.2479  | 9.2434  | -1.9295 |
| YRI | NPIP | 15248613 | 7.0807  | 9.7476  | -0.817  |
| YRI | NPIP | 15253613 | 6.7026  | 8.067   | -0.4979 |
| YRI | NPIP | 15258613 | 2.9648  | 5.2099  | -1.2152 |
| YRI | NPIP | 15263613 | 3.4459  | 6.7225  | -1.4119 |
| YRI | NPIP | 15268613 | 3.767   | 7.0586  | -1.357  |
| YRI | NPIP | 15273613 | 3.4757  | 7.0586  | -1.4771 |
| YRI | NPIP | 15278613 | 4.7243  | 6.7225  | -0.861  |
| YRI | NPIP | 15283613 | 3.4958  | 5.378   | -0.9906 |
| YRI | NPIP | 15288613 | 2.4542  | 5.5461  | -1.5833 |
| YRI | NPIP | 15293613 | 2.693   | 5.8822  | -1.5497 |
| YRI | NPIP | 15298613 | 6.2205  | 7.8989  | -0.6244 |
| YRI | NPIP | 15303613 | 5.4345  | 6.7225  | -0.555  |
| YRI | NPIP | 15308613 | 2.5649  | 4.2016  | -1.0691 |
| YRI | NPIP | 15313613 | 5.6003  | 6.5544  | -0.4206 |
| YRI | NPIP | 15318613 | 5.0106  | 7.3947  | -0.9421 |
| YRI | NPIP | 15323613 | 6.6156  | 8.067   | -0.5296 |
| YRI | NPIP | 15328613 | 5.069   | 5.0419  | 0.0151  |
| YRI | NPIP | 15333613 | 0.2705  | 1.6806  | -1.9399 |
| YRI | NPIP | 15338613 | 0.6422  | 3.1932  | -2.1039 |
| YRI | NPIP | 15343613 | 0.5543  | 2.689   | -2.0287 |
| YRI | NPIP | 15348613 | 1.109   | 2.3529  | -1.3167 |
| YRI | NPIP | 15353613 | 1.6904  | 3.1932  | -1.2394 |
| YRI | NPIP | 15358613 | 2.3897  | 4.7057  | -1.371  |
| YRI | NPIP | 15363613 | 1.8653  | 5.378   | -1.8487 |
| YRI | NPIP | 15368613 | 1.6121  | 4.8738  | -1.8723 |
| YRI | NPIP | 15373613 | 2.6329  | 5.2099  | -1.3949 |
| YRI | NPIP | 15378613 | 5.8091  | 8.7392  | -0.9932 |
| YRI | NPIP | 15383613 | 6.9714  | 10.0837 | -0.9238 |
| YRI | NPIP | 15388613 | 3.6387  | 6.2183  | -1.1925 |
| YRI | NPIP | 15393613 | 4.5877  | 7.7309  | -1.1926 |
| YRI | NPIP | 15398613 | 5.8088  | 9.9157  | -1.2382 |
| YRI | NPIP | 15403613 | 5.9488  | 8.7392  | -0.9459 |
| YRI | NPIP | 15408613 | 5.8944  | 7.0586  | -0.4799 |
| YRI | NPIP | 15413613 | 5.911   | 7.2267  | -0.5309 |
| YRI | NPIP | 15418613 | 4.175   | 6.5544  | -1.049  |
| YRI | NPIP | 15423613 | 1.3971  | 3.6974  | -1.6766 |
| YRI | NPIP | 15428613 | 1.0487  | 2.8571  | -1.6354 |
| YRI | NPIP | 15433613 | 0.4989  | 2.1848  | -1.8929 |
| YRI | NPIP | 15438613 | 0.5738  | 2.689   | -2.0102 |
| YRI | NPIP | 15443613 | 0.9413  | 3.0251  | -1.7976 |
| YRI | NPIP | 15448613 | 1.4574  | 4.0335  | -1.743  |
| YRI | NPIP | 15453613 | 1.8158  | 4.7057  | -1.7107 |
| YRI | NPIP | 15458613 | 2.5518  | 5.2099  | -1.4388 |
| YRI | NPIP | 15463613 | 3.3881  | 6.7225  | -1.4368 |

## 2\_TajimasD\_data

|     |      |          |         |         |         |
|-----|------|----------|---------|---------|---------|
| YRI | NPIP | 15468613 | 4.7679  | 8.5712  | -1.3125 |
| YRI | NPIP | 15473613 | 6.6583  | 10.0837 | -1.0167 |
| YRI | NPIP | 15478613 | 6.2816  | 10.756  | -1.2504 |
| YRI | NPIP | 15483613 | 5.2837  | 9.9157  | -1.3966 |
| YRI | NPIP | 15488613 | 7.4899  | 10.5879 | -0.8786 |
| YRI | NPIP | 15493613 | 7.1362  | 11.2602 | -1.104  |
| YRI | NPIP | 15498613 | 8.0639  | 12.4366 | -1.0661 |
| YRI | NPIP | 15503613 | 9.6203  | 13.2769 | -0.838  |
| YRI | NPIP | 15508613 | 10.0432 | 13.1089 | -0.7111 |
| YRI | NPIP | 15513613 | 11.2903 | 13.1089 | -0.4219 |
| YRI | NPIP | 15518613 | 11.4271 | 13.2769 | -0.4239 |
| YRI | NPIP | 15523613 | 9.6186  | 15.6298 | -1.1797 |
| YRI | NPIP | 15528613 | 6.384   | 15.2937 | -1.7852 |
| YRI | NPIP | 15533613 | 5.9236  | 12.6047 | -1.6083 |
| YRI | NPIP | 15538613 | 6.9742  | 12.1005 | -1.2825 |
| YRI | NPIP | 15543613 | 8.6479  | 13.445  | -1.0864 |
| YRI | NPIP | 15548613 | 9.5229  | 13.7811 | -0.942  |
| YRI | NPIP | 15553613 | 10.0781 | 12.7727 | -0.6406 |
| YRI | NPIP | 15558613 | 9.0055  | 10.756  | -0.4892 |
| YRI | NPIP | 15563613 | 8.5529  | 11.9324 | -0.8567 |
| YRI | NPIP | 15568613 | 7.8694  | 10.5879 | -0.771  |
| YRI | NPIP | 15573613 | 6.5663  | 10.756  | -1.1708 |
| YRI | NPIP | 15578613 | 5.4762  | 11.2602 | -1.5484 |
| YRI | NPIP | 15583613 | 7.6845  | 9.4115  | -0.5466 |
| YRI | NPIP | 15588613 | 8.6531  | 11.4282 | -0.7326 |
| YRI | NPIP | 15593613 | 6.8788  | 13.613  | -1.5072 |
| YRI | NPIP | 15598613 | 10.6267 | 13.9492 | -0.7266 |
| YRI | NPIP | 15603613 | 10.3358 | 14.2853 | -0.8444 |
| YRI | NPIP | 15608613 | 9.0058  | 17.1423 | -1.4619 |
| YRI | NPIP | 15613613 | 10.0642 | 16.6382 | -1.2154 |
| YRI | NPIP | 15618613 | 9.7799  | 13.7811 | -0.8852 |
| YRI | NPIP | 15623613 | 12.1568 | 13.613  | -0.3259 |
| YRI | NPIP | 15628613 | 12.1709 | 14.9575 | -0.5703 |
| YRI | NPIP | 15633613 | 8.9436  | 13.2769 | -0.9931 |
| YRI | NPIP | 15638613 | 8.81    | 11.4282 | -0.6912 |
| YRI | NPIP | 15643613 | 9.1838  | 12.7727 | -0.8532 |
| YRI | NPIP | 15648613 | 7.6625  | 12.9408 | -1.2394 |
| YRI | NPIP | 15653613 | 7.985   | 11.5963 | -0.9404 |
| YRI | NPIP | 15658613 | 9.4979  | 10.756  | -0.3516 |
| YRI | NPIP | 15663613 | 10.0187 | 11.5963 | -0.4108 |
| YRI | NPIP | 15668613 | 11.2454 | 15.2937 | -0.8112 |
| YRI | NPIP | 15673613 | 11.8711 | 15.2937 | -0.6858 |
| YRI | NPIP | 15678613 | 8.7619  | 11.4282 | -0.7039 |
| YRI | NPIP | 15683613 | 9.1079  | 12.7727 | -0.8713 |
| YRI | NPIP | 15688613 | 7.0737  | 12.4366 | -1.3075 |
| YRI | NPIP | 15693613 | 4.4553  | 9.7476  | -1.6212 |
| YRI | NPIP | 15698613 | 5.8589  | 10.4199 | -1.313  |
| YRI | NPIP | 15703613 | 8.4748  | 12.1005 | -0.9071 |
| YRI | NPIP | 15708613 | 8.1781  | 10.2518 | -0.6061 |

## 2\_TajimasD\_data

|     |      |          |         |         |         |
|-----|------|----------|---------|---------|---------|
| YRI | NPIP | 15713613 | 5.0113  | 8.4031  | -1.1921 |
| YRI | NPIP | 15718613 | 5.8575  | 10.4199 | -1.3134 |
| YRI | NPIP | 15723613 | 5.6953  | 9.2434  | -1.1419 |
| YRI | NPIP | 15728613 | 5.5382  | 7.2267  | -0.6813 |
| YRI | NPIP | 15733613 | 6.0751  | 9.2434  | -1.0196 |
| YRI | NPIP | 15738613 | 5.6721  | 10.924  | -1.4465 |
| YRI | NPIP | 15743613 | 5.393   | 13.1089 | -1.7898 |
| YRI | NPIP | 15748613 | 4.5907  | 12.2685 | -1.896  |
| YRI | NPIP | 15753613 | 5.2239  | 12.1005 | -1.7204 |
| YRI | NPIP | 15758613 | 8.0588  | 15.6298 | -1.4859 |
| YRI | NPIP | 15763613 | 9.0409  | 15.1256 | -1.2321 |
| YRI | NPIP | 15768613 | 8.0819  | 13.7811 | -1.2608 |
| YRI | NPIP | 15773613 | 8.3889  | 12.6047 | -1.0149 |
| YRI | NPIP | 15778613 | 7.4995  | 11.2602 | -1.0067 |
| YRI | NPIP | 15783613 | 7.5013  | 11.7644 | -1.0952 |
| YRI | NPIP | 15788613 | 12.2618 | 15.9659 | -0.7123 |
| YRI | NPIP | 15793613 | 13.4391 | 17.6465 | -0.7352 |
| YRI | NPIP | 15798613 | 11.4258 | 14.4534 | -0.6402 |
| YRI | NPIP | 15803613 | 12.3591 | 15.6298 | -0.6419 |
| YRI | NPIP | 15808613 | 11.8052 | 16.4701 | -0.8709 |
| YRI | NPIP | 15813613 | 11.1411 | 15.7978 | -0.9046 |
| YRI | NPIP | 15818613 | 13.0337 | 17.4785 | -0.7839 |
| YRI | NPIP | 15823613 | 12.1755 | 17.9827 | -0.9966 |
| YRI | NPIP | 15828613 | 7.9934  | 14.2853 | -1.3453 |
| YRI | NPIP | 15833613 | 7.1161  | 11.9324 | -1.2209 |
| YRI | NPIP | 15838613 | 10.7041 | 12.9408 | -0.5252 |
| YRI | NPIP | 15843613 | 12.9266 | 13.445  | -0.1174 |
| YRI | NPIP | 15848613 | 12.0262 | 14.7895 | -0.5716 |
| YRI | NPIP | 15853613 | 9.65    | 12.2685 | -0.6466 |
| YRI | NPIP | 15858613 | 10.0807 | 12.6047 | -0.6076 |
| YRI | NPIP | 15863613 | 11.2808 | 15.1256 | -0.7785 |
| YRI | NPIP | 15868613 | 15.3683 | 17.4785 | -0.3721 |
| YRI | NPIP | 15873613 | 15.1715 | 17.4785 | -0.4069 |
| CEU | NPIP | 15884140 | 14.884  | 13.645  | 0.2784  |
| CEU | NPIP | 15889140 | 12.7221 | 10.0632 | 0.7957  |
| CEU | NPIP | 15894140 | 8.5436  | 7.5047  | 0.4076  |
| CEU | NPIP | 15899140 | 10.7721 | 9.5515  | 0.3835  |
| CEU | NPIP | 15904140 | 12.5068 | 11.0866 | 0.3882  |
| CEU | NPIP | 15909140 | 18.0852 | 15.1801 | 0.5899  |
| CEU | NPIP | 15914140 | 32.1735 | 21.832  | 1.4815  |
| CEU | NPIP | 15919140 | 26.2782 | 18.7619 | 1.2461  |
| CEU | NPIP | 15924140 | 13.5493 | 10.7454 | 0.7892  |
| CEU | NPIP | 15929140 | 13.5102 | 9.8926  | 1.1     |
| CEU | NPIP | 15934140 | 7.9765  | 7.6753  | 0.1158  |
| CEU | NPIP | 15939140 | 10.0495 | 7.5047  | 0.9985  |
| CEU | NPIP | 15944140 | 15.7444 | 9.0398  | 2.2167  |
| CEU | NPIP | 15949140 | 18.3884 | 11.5982 | 1.7791  |
| CEU | NPIP | 15954140 | 14.9029 | 12.4511 | 0.6009  |
| CEU | NPIP | 15959140 | 15.7588 | 16.2034 | -0.0848 |

## 2\_TajimasD\_data

|     |      |          |         |         |         |
|-----|------|----------|---------|---------|---------|
| CEU | NPIP | 15964140 | 18.7906 | 19.7852 | -0.1567 |
| CEU | NPIP | 15969140 | 15.1045 | 18.0796 | -0.5111 |
| CEU | NPIP | 15974140 | 18.4593 | 19.7852 | -0.2089 |
| CEU | NPIP | 15979140 | 20.2449 | 17.5679 | 0.4727  |
| CEU | NPIP | 15984140 | 14.987  | 11.5982 | 0.8879  |
| CEU | NPIP | 15989140 | 9.6219  | 8.5281  | 0.3816  |
| CEU | NPIP | 15994140 | 7.8613  | 7.6753  | 0.0715  |
| CEU | NPIP | 15999140 | 10.6273 | 8.3576  | 0.8068  |
| CEU | NPIP | 16004140 | 10.4098 | 9.0398  | 0.453   |
| CEU | NPIP | 16009140 | 6.7739  | 9.7221  | -0.9111 |
| CEU | NPIP | 16014140 | 4.0695  | 9.0398  | -1.6433 |
| CEU | NPIP | 16019140 | 2.4028  | 7.8459  | -2.0505 |
| CEU | NPIP | 16024140 | 2.9695  | 5.2874  | -1.2463 |
| CEU | NPIP | 16029140 | 3.5935  | 3.0701  | 0.449   |
| CEU | NPIP | 16034140 | 5.7887  | 5.1169  | 0.3719  |
| CEU | NPIP | 16039140 | 9.2171  | 7.8459  | 0.5165  |
| CEU | NPIP | 16044140 | 9.2863  | 8.6987  | 0.2013  |
| CEU | NPIP | 16049140 | 8.1575  | 7.3342  | 0.3299  |
| CEU | NPIP | 16054140 | 7.3898  | 6.1402  | 0.588   |
| CEU | NPIP | 16059140 | 9.3385  | 8.3576  | 0.3487  |
| CEU | NPIP | 16064140 | 9.6001  | 8.8692  | 0.2459  |
| CEU | NPIP | 16069140 | 8.6914  | 8.6987  | -0.0025 |
| CEU | NPIP | 16074140 | 11.8376 | 11.4277 | 0.1089  |
| CEU | NPIP | 16079140 | 11.8765 | 11.7688 | 0.0278  |
| CEU | NPIP | 16084140 | 10.4271 | 11.4277 | -0.2658 |
| CEU | NPIP | 16089140 | 9.5968  | 11.0866 | -0.4072 |
| CEU | NPIP | 16094140 | 21.3426 | 13.9861 | 1.6149  |
| CEU | NPIP | 16099140 | 27.8907 | 15.3506 | 2.5195  |
| CEU | NPIP | 16104140 | 29.195  | 17.7385 | 2.0045  |
| CEU | NPIP | 16109140 | 23.061  | 15.8623 | 1.4018  |
| CEU | NPIP | 16114140 | 9.5883  | 10.2337 | -0.1901 |
| CEU | NPIP | 16119140 | 8.8167  | 10.5749 | -0.5023 |
| CEU | NPIP | 16124140 | 10.7739 | 9.7221  | 0.325   |
| CEU | NPIP | 16129140 | 12.0616 | 9.7221  | 0.723   |
| CEU | NPIP | 16134140 | 10.2463 | 9.7221  | 0.162   |
| CEU | NPIP | 16139140 | 9.9633  | 10.2337 | -0.0797 |
| CEU | NPIP | 16144140 | 10.6514 | 10.5749 | 0.0219  |
| CEU | NPIP | 16149140 | 9.0693  | 9.3809  | -0.0995 |
| CEU | NPIP | 16154140 | 6.8879  | 7.8459  | -0.3609 |
| CEU | NPIP | 16159140 | 11.5918 | 10.4043 | 0.3445  |
| CEU | NPIP | 16164140 | 13.4968 | 11.4277 | 0.5497  |
| CEU | NPIP | 16169140 | 12.0008 | 11.2571 | 0.2004  |
| CEU | NPIP | 16174140 | 11.3236 | 11.5982 | -0.0719 |
| CEU | NPIP | 16179140 | 11.1519 | 9.8926  | 0.3829  |
| CEU | NPIP | 16184140 | 12.45   | 10.2337 | 0.6529  |
| CEU | NPIP | 16189140 | 10.2261 | 9.2104  | 0.33    |
| CEU | NPIP | 16194140 | 10.8194 | 12.6216 | -0.436  |
| CEU | NPIP | 16199140 | 14.2268 | 15.1801 | -0.1936 |
| CEU | NPIP | 16204140 | 17.5281 | 15.0095 | 0.517   |

## 2\_TajimasD\_data

|     |      |          |         |         |         |
|-----|------|----------|---------|---------|---------|
| CEU | NPIP | 16209140 | 11.872  | 12.1099 | -0.0598 |
| CEU | NPIP | 16214140 | 3.5584  | 6.6519  | -1.3544 |
| CEU | NPIP | 16219140 | 4.9877  | 8.0164  | -1.1187 |
| CEU | NPIP | 16224140 | 8.5604  | 11.0866 | -0.6905 |
| CEU | NPIP | 16229140 | 9.8881  | 10.5749 | -0.1962 |
| CEU | NPIP | 16234140 | 8.7685  | 8.187   | 0.2107  |
| CEU | NPIP | 16239140 | 8.2552  | 8.3576  | -0.0364 |
| CEU | NPIP | 16244140 | 9.1235  | 11.4277 | -0.6122 |
| CEU | NPIP | 16249140 | 11.3059 | 12.7922 | -0.3551 |
| CEU | NPIP | 16254140 | 10.1499 | 11.0866 | -0.256  |
| CEU | NPIP | 16259140 | 11.7295 | 12.2805 | -0.1368 |
| CEU | NPIP | 16264140 | 14.4585 | 13.1333 | 0.3088  |
| CEU | NPIP | 16269140 | 11.3251 | 11.2571 | 0.0183  |
| CEU | NPIP | 16274140 | 12.2527 | 13.8156 | -0.3471 |
| CEU | NPIP | 16279140 | 14.9602 | 12.7922 | 0.5179  |
| CEU | NPIP | 16284140 | 16.3577 | 11.5982 | 1.247   |
| CEU | NPIP | 16289140 | 24.1864 | 15.5212 | 1.7227  |
| CEU | NPIP | 16294140 | 21.7215 | 14.1567 | 1.6416  |
| CEU | NPIP | 16299140 | 7.9316  | 9.3809  | -0.463  |
| CEU | NPIP | 16304140 | 5.4016  | 9.7221  | -1.3352 |
| CEU | NPIP | 16309140 | 5.651   | 9.3809  | -1.1916 |
| CEU | NPIP | 16314140 | 2.7469  | 5.6286  | -1.4658 |
| CEU | NPIP | 16319140 | 2.6491  | 5.9697  | -1.6026 |
| CEU | NPIP | 16324140 | 4.0631  | 7.3342  | -1.3106 |
| CEU | NPIP | 16329140 | 3.024   | 5.9697  | -1.4216 |
| CEU | NPIP | 16334140 | 1.1413  | 2.729   | -1.5007 |
| CEU | NPIP | 16339140 | 1.1521  | 2.0467  | -1.0645 |
| CEU | NPIP | 16344140 | 1.8126  | 3.0701  | -1.0787 |
| CEU | NPIP | 16349140 | 3.2338  | 5.2874  | -1.1042 |
| CEU | NPIP | 16354140 | 4.9274  | 8.8692  | -1.3264 |
| CEU | NPIP | 16359140 | 5.2632  | 9.2104  | -1.2826 |
| CEU | NPIP | 16364140 | 4.9528  | 5.7991  | -0.4192 |
| CEU | NPIP | 16369140 | 2.9423  | 1.8762  | 1.3573  |
| CEU | NPIP | 16374140 | 0.5314  | 0.5117  | 0.0618  |
| CEU | NPIP | 16379140 | 0.0501  | 0.5117  | -1.4477 |
| CEU | NPIP | 16384140 | 0.3531  | 0.3411  | 0.0481  |
| CEU | NPIP | 16389140 | 0.343   | 0.1706  | 1.0241  |
| CEU | NPIP | 16394140 | 0       | 0       | 0       |
| CEU | NPIP | 16399140 | 0       | 0       | 0       |
| CEU | NPIP | 16404140 | 0       | 0       | 0       |
| CEU | NPIP | 16409140 | 0       | 0       | 0       |
| CEU | NPIP | 16414140 | 0.0901  | 0.5117  | -1.3222 |
| CEU | NPIP | 16419140 | 0.5366  | 1.3645  | -1.3394 |
| CEU | NPIP | 16424140 | 0.584   | 1.5351  | -1.4103 |
| CEU | NPIP | 16429140 | 0.1476  | 0.8528  | -1.5881 |
| CEU | NPIP | 16434140 | 0.0202  | 0.3411  | -1.2864 |
| CEU | NPIP | 16439140 | 0.0101  | 0.1706  | -0.9534 |
| CEU | NPIP | 16444140 | 0       | 0       | 0       |
| CEU | NPIP | 16449140 | 1.2946  | 1.8762  | -0.7405 |

## 2\_TajimasD\_data

|     |      |          |         |         |         |
|-----|------|----------|---------|---------|---------|
| CEU | NPIP | 16454140 | 1.698   | 3.2407  | -1.265  |
| CEU | NPIP | 16459140 | 0.7838  | 4.6052  | -2.3201 |
| CEU | NPIP | 16464140 | 1.7788  | 6.4814  | -2.1078 |
| CEU | NPIP | 16469140 | 1.4477  | 3.4112  | -1.5422 |
| CEU | NPIP | 16474140 | 0.0493  | 0.1706  | -0.7205 |
| CEU | NPIP | 16479140 | 0.5129  | 0.8528  | -0.7654 |
| CEU | NPIP | 16484140 | 0.5129  | 0.8528  | -0.7654 |
| CEU | NPIP | 16489140 | 0       | 0       | 0       |
| CEU | NPIP | 16494140 | 0.4919  | 0.6822  | -0.4969 |
| CEU | NPIP | 16499140 | 1.1575  | 1.1939  | -0.0649 |
| CEU | NPIP | 16504140 | 0.7351  | 0.8528  | -0.2651 |
| CEU | NPIP | 16509140 | 2.0355  | 2.0467  | -0.0133 |
| CEU | NPIP | 16514140 | 3.9173  | 2.729   | 1.1232  |
| CEU | NPIP | 16519140 | 2.0416  | 2.0467  | -0.0061 |
| CEU | NPIP | 16524140 | 0.1105  | 1.3645  | -2.0287 |
| CEU | NPIP | 16529140 | 0.5902  | 1.0234  | -0.8608 |
| CEU | NPIP | 16534140 | 2.9021  | 2.5584  | 0.3424  |
| CEU | NPIP | 16539140 | 4.1229  | 4.6052  | -0.2928 |
| CEU | NPIP | 16544140 | 3.4323  | 3.9229  | -0.3422 |
| CEU | NPIP | 16549140 | 2.1548  | 1.5351  | 0.9189  |
| CEU | NPIP | 16554140 | 3.6007  | 3.4112  | 0.1488  |
| CEU | NPIP | 16559140 | 6.2113  | 8.3576  | -0.7629 |
| CEU | NPIP | 16564140 | 7.5799  | 11.0866 | -0.9585 |
| CEU | NPIP | 16569140 | 8.9817  | 9.0398  | -0.0192 |
| CEU | NPIP | 16574140 | 7.4133  | 5.2874  | 1.1431  |
| CEU | NPIP | 16579140 | 4.7815  | 3.4112  | 1.0763  |
| CEU | NPIP | 16584140 | 5.932   | 4.6052  | 0.8056  |
| CEU | NPIP | 16589140 | 5.6632  | 4.4346  | 0.7709  |
| CEU | NPIP | 16594140 | 2.6217  | 2.0467  | 0.6842  |
| CEU | NPIP | 16599140 | 1.1606  | 1.5351  | -0.5553 |
| CEU | NPIP | 16604140 | 0.9546  | 1.8762  | -1.1734 |
| CEU | NPIP | 16609140 | 0.8009  | 1.3645  | -0.9118 |
| CEU | NPIP | 16614140 | 2.545   | 2.5584  | -0.0133 |
| CEU | NPIP | 16619140 | 4.5774  | 4.7757  | -0.1166 |
| CEU | NPIP | 16624140 | 5.06    | 5.9697  | -0.439  |
| CEU | NPIP | 16629140 | 11.1371 | 8.5281  | 0.9103  |
| CEU | NPIP | 16634140 | 17.4471 | 10.7454 | 1.8863  |
| CEU | NPIP | 16639140 | 13.637  | 10.7454 | 0.8139  |
| CEU | NPIP | 16644140 | 10.126  | 10.4043 | -0.0807 |
| CEU | NPIP | 16649140 | 6.76    | 8.0164  | -0.4641 |
| CEU | NPIP | 16654140 | 4.0771  | 5.9697  | -0.9134 |
| CEU | NPIP | 16659140 | 4.3673  | 6.4814  | -0.9476 |
| CEU | NPIP | 16664140 | 2.1849  | 5.2874  | -1.6682 |
| CEU | NPIP | 16669140 | 5.4494  | 6.8225  | -0.5875 |
| CEU | NPIP | 16674140 | 8.9507  | 13.1333 | -0.9746 |
| CEU | NPIP | 16679140 | 8.7734  | 14.1567 | -1.1682 |
| CEU | NPIP | 16684140 | 8.7277  | 10.2337 | -0.4437 |
| CEU | NPIP | 16689140 | 6.1084  | 7.1636  | -0.4319 |
| CEU | NPIP | 16694140 | 6.7516  | 5.9697  | 0.3774  |

## 2\_TajimasD\_data

|     |      |          |         |         |         |
|-----|------|----------|---------|---------|---------|
| CEU | NPIP | 16699140 | 7.6428  | 5.9697  | 0.8075  |
| CEU | NPIP | 16704140 | 5.4108  | 5.458   | -0.0247 |
| CEU | NPIP | 16709140 | 7.3185  | 6.8225  | 0.2122  |
| CEU | NPIP | 16714140 | 8.0324  | 7.5047  | 0.207   |
| CEU | NPIP | 16719140 | 5.4842  | 6.4814  | -0.447  |
| CEU | NPIP | 16724140 | 6.4288  | 8.8692  | -0.8212 |
| CEU | NPIP | 16729140 | 10.0831 | 11.9394 | -0.4733 |
| CEU | NPIP | 16734140 | 7.4583  | 8.5281  | -0.3733 |
| CEU | NPIP | 16739140 | 3.5345  | 4.7757  | -0.73   |
| CEU | NPIP | 16744140 | 4.9437  | 5.6286  | -0.3484 |
| CEU | NPIP | 16749140 | 7.6984  | 7.1636  | 0.2189  |
| CEU | NPIP | 16754140 | 5.8986  | 5.1169  | 0.4327  |
| CEU | NPIP | 16759140 | 2.1758  | 2.0467  | 0.1536  |
| CEU | NPIP | 16764140 | 1.1608  | 1.0234  | 0.273   |
| CEU | NPIP | 16769140 | 1.4826  | 1.7056  | -0.3054 |
| CEU | NPIP | 16774140 | 2.1356  | 2.0467  | 0.1058  |
| CEU | NPIP | 16779140 | 7.6753  | 4.0935  | 2.4085  |
| CEU | NPIP | 16784140 | 10.1282 | 6.3108  | 1.7526  |
| CEU | NPIP | 16789140 | 4.2507  | 3.9229  | 0.2286  |
| CEU | NPIP | 16794140 | 3.375   | 3.2407  | 0.1101  |
| CEU | NPIP | 16799140 | 3.6139  | 2.729   | 0.8364  |
| CEU | NPIP | 16804140 | 2.0247  | 1.5351  | 0.726   |
| CEU | NPIP | 16809140 | 3.4609  | 3.0701  | 0.3352  |
| CEU | NPIP | 16814140 | 2.5067  | 2.2173  | 0.3233  |
| CEU | NPIP | 16819140 | 0.7227  | 1.0234  | -0.5975 |
| CEU | NPIP | 16824140 | 0.719   | 1.3645  | -1.0443 |
| CEU | NPIP | 16829140 | 4.4334  | 3.9229  | 0.3561  |
| CEU | NPIP | 16834140 | 8.3252  | 6.8225  | 0.643   |
| CEU | NPIP | 16839140 | 7.2577  | 6.6519  | 0.2652  |
| CEU | NPIP | 16844140 | 8.8417  | 7.8459  | 0.3751  |
| CEU | NPIP | 16849140 | 10.7821 | 8.0164  | 1.0215  |
| CEU | NPIP | 16854140 | 9.568   | 8.187   | 0.5003  |
| CEU | NPIP | 16859140 | 8.1669  | 9.8926  | -0.5247 |
| CEU | NPIP | 16864140 | 10.9032 | 12.1099 | -0.3036 |
| CEU | NPIP | 16869140 | 15.473  | 13.645  | 0.4108  |
| CEU | NPIP | 16874140 | 11.785  | 9.8926  | 0.5754  |
| CEU | NPIP | 16879140 | 5.9184  | 7.5047  | -0.6224 |
| CEU | NPIP | 16884140 | 5.2422  | 6.6519  | -0.6172 |
| CHB | NPIP | 15884140 | 10.5448 | 13.5532 | -0.6785 |
| CHB | NPIP | 15889140 | 8.3255  | 11.8591 | -0.904  |
| CHB | NPIP | 15894140 | 6.8003  | 9.1484  | -0.7656 |
| CHB | NPIP | 15899140 | 10.3432 | 10.6731 | -0.0932 |
| CHB | NPIP | 15904140 | 12.1932 | 13.7226 | -0.3409 |
| CHB | NPIP | 15909140 | 16.7116 | 16.7721 | -0.0111 |
| CHB | NPIP | 15914140 | 29.5907 | 23.0404 | 0.8882  |
| CHB | NPIP | 15919140 | 23.6623 | 21.6851 | 0.2843  |
| CHB | NPIP | 15924140 | 12.3899 | 12.7061 | -0.0758 |
| CHB | NPIP | 15929140 | 12.7719 | 8.4708  | 1.5057  |
| CHB | NPIP | 15934140 | 8.0996  | 7.6237  | 0.1835  |



## 2\_TajimasD\_data

|     |      |          |         |         |         |
|-----|------|----------|---------|---------|---------|
| CHB | NPIP | 15939140 | 11.8679 | 8.979   | 0.9583  |
| CHB | NPIP | 15944140 | 18.913  | 10.6731 | 2.3273  |
| CHB | NPIP | 15949140 | 23.2696 | 13.5532 | 2.1912  |
| CHB | NPIP | 15954140 | 21.5361 | 13.5532 | 1.8003  |
| CHB | NPIP | 15959140 | 27.0179 | 15.7556 | 2.2009  |
| CHB | NPIP | 15964140 | 33.2749 | 18.2968 | 2.5366  |
| CHB | NPIP | 15969140 | 29.5035 | 16.7721 | 2.3437  |
| CHB | NPIP | 15974140 | 33.337  | 18.9745 | 2.3488  |
| CHB | NPIP | 15979140 | 29.9086 | 17.1109 | 2.3112  |
| CHB | NPIP | 15984140 | 17.8398 | 12.3673 | 1.3458  |
| CHB | NPIP | 15989140 | 9.5876  | 8.979   | 0.2019  |
| CHB | NPIP | 15994140 | 6.5496  | 7.4543  | -0.3561 |
| CHB | NPIP | 15999140 | 8.8145  | 8.1319  | 0.2481  |
| CHB | NPIP | 16004140 | 8.2502  | 9.6567  | -0.4361 |
| CHB | NPIP | 16009140 | 5.4059  | 11.5202 | -1.6075 |
| CHB | NPIP | 16014140 | 3.4019  | 9.8261  | -1.96   |
| CHB | NPIP | 16019140 | 2.0348  | 8.3013  | -2.2349 |
| CHB | NPIP | 16024140 | 3.719   | 7.7931  | -1.5398 |
| CHB | NPIP | 16029140 | 4.5254  | 5.9295  | -0.6797 |
| CHB | NPIP | 16034140 | 6.0857  | 6.7766  | -0.2966 |
| CHB | NPIP | 16039140 | 9.7474  | 8.979   | 0.2549  |
| CHB | NPIP | 16044140 | 10.1708 | 10.6731 | -0.1419 |
| CHB | NPIP | 16049140 | 9.1738  | 10.6731 | -0.4235 |
| CHB | NPIP | 16054140 | 8.2962  | 8.4708  | -0.0611 |
| CHB | NPIP | 16059140 | 10.5698 | 10.8426 | -0.0759 |
| CHB | NPIP | 16064140 | 11.3377 | 11.6896 | -0.0913 |
| CHB | NPIP | 16069140 | 9.7702  | 11.1814 | -0.3816 |
| CHB | NPIP | 16074140 | 15.5077 | 13.892  | 0.3559  |
| CHB | NPIP | 16079140 | 14.5747 | 14.7391 | -0.0342 |
| CHB | NPIP | 16084140 | 10.0967 | 14.0615 | -0.8634 |
| CHB | NPIP | 16089140 | 9.8951  | 12.0285 | -0.5386 |
| CHB | NPIP | 16094140 | 21.4754 | 15.4168 | 1.2088  |
| CHB | NPIP | 16099140 | 27.4475 | 16.2638 | 2.1203  |
| CHB | NPIP | 16104140 | 23.056  | 17.1109 | 1.0736  |
| CHB | NPIP | 16109140 | 17.6484 | 14.4003 | 0.6915  |
| CHB | NPIP | 16114140 | 9.8521  | 8.8096  | 0.352   |
| CHB | NPIP | 16119140 | 8.2452  | 9.4872  | -0.3915 |
| CHB | NPIP | 16124140 | 9.087   | 8.4708  | 0.2157  |
| CHB | NPIP | 16129140 | 12.2469 | 9.1484  | 1.0102  |
| CHB | NPIP | 16134140 | 12.8778 | 10.3343 | 0.7404  |
| CHB | NPIP | 16139140 | 11.6162 | 11.012  | 0.1657  |
| CHB | NPIP | 16144140 | 9.3849  | 9.8261  | -0.1346 |
| CHB | NPIP | 16149140 | 8.3788  | 8.4708  | -0.0322 |
| CHB | NPIP | 16154140 | 7.2604  | 9.3178  | -0.6595 |
| CHB | NPIP | 16159140 | 11.9933 | 11.6896 | 0.0788  |
| CHB | NPIP | 16164140 | 13.8688 | 11.5202 | 0.6175  |
| CHB | NPIP | 16169140 | 11.4279 | 11.3508 | 0.0206  |
| CHB | NPIP | 16174140 | 11.2121 | 11.6896 | -0.1238 |
| CHB | NPIP | 16179140 | 11.4457 | 10.3343 | 0.3235  |

## 2\_TajimasD\_data

|     |      |          |         |         |         |
|-----|------|----------|---------|---------|---------|
| CHB | NPIP | 16184140 | 13.1952 | 10.5037 | 0.7716  |
| CHB | NPIP | 16189140 | 10.91   | 9.8261  | 0.3307  |
| CHB | NPIP | 16194140 | 10.9846 | 13.045  | -0.4818 |
| CHB | NPIP | 16199140 | 14.0626 | 15.7556 | -0.3308 |
| CHB | NPIP | 16204140 | 15.5037 | 16.6027 | -0.2043 |
| CHB | NPIP | 16209140 | 11.2001 | 14.4003 | -0.6813 |
| CHB | NPIP | 16214140 | 5.7674  | 9.1484  | -1.1023 |
| CHB | NPIP | 16219140 | 5.9409  | 7.7931  | -0.7    |
| CHB | NPIP | 16224140 | 8.4642  | 10.1649 | -0.5027 |
| CHB | NPIP | 16229140 | 9.6722  | 10.6731 | -0.2827 |
| CHB | NPIP | 16234140 | 8.2846  | 8.8096  | -0.1773 |
| CHB | NPIP | 16239140 | 6.6827  | 9.6567  | -0.9222 |
| CHB | NPIP | 16244140 | 7.517   | 10.8426 | -0.9255 |
| CHB | NPIP | 16249140 | 11.3782 | 11.3508 | 0.0073  |
| CHB | NPIP | 16254140 | 9.9519  | 9.6567  | 0.0915  |
| CHB | NPIP | 16259140 | 9.1316  | 11.1814 | -0.5542 |
| CHB | NPIP | 16264140 | 12.3005 | 13.3838 | -0.2472 |
| CHB | NPIP | 16269140 | 12.3042 | 11.5202 | 0.2061  |
| CHB | NPIP | 16274140 | 12.148  | 14.4003 | -0.4795 |
| CHB | NPIP | 16279140 | 10.8253 | 13.3838 | -0.5839 |
| CHB | NPIP | 16284140 | 16.015  | 11.3508 | 1.2435  |
| CHB | NPIP | 16289140 | 23.6648 | 15.4168 | 1.6456  |
| CHB | NPIP | 16294140 | 18.1498 | 12.8755 | 1.2487  |
| CHB | NPIP | 16299140 | 6.3044  | 9.3178  | -0.9659 |
| CHB | NPIP | 16304140 | 2.4562  | 11.1814 | -2.3592 |
| CHB | NPIP | 16309140 | 3.6119  | 9.3178  | -1.829  |
| CHB | NPIP | 16314140 | 2.771   | 5.0825  | -1.2833 |
| CHB | NPIP | 16319140 | 2.5347  | 4.913   | -1.3604 |
| CHB | NPIP | 16324140 | 2.7984  | 6.0989  | -1.558  |
| CHB | NPIP | 16329140 | 1.5926  | 5.4213  | -2.0077 |
| CHB | NPIP | 16334140 | 0.5652  | 3.2189  | -2.1817 |
| CHB | NPIP | 16339140 | 0.4862  | 1.8636  | -1.7574 |
| CHB | NPIP | 16344140 | 0.6314  | 1.8636  | -1.5721 |
| CHB | NPIP | 16349140 | 1.6621  | 4.7436  | -1.8177 |
| CHB | NPIP | 16354140 | 2.6433  | 6.946   | -1.8061 |
| CHB | NPIP | 16359140 | 2.3981  | 7.2848  | -1.9643 |
| CHB | NPIP | 16364140 | 2.3516  | 5.5907  | -1.6527 |
| CHB | NPIP | 16369140 | 1.83    | 1.6942  | 0.1864  |
| CHB | NPIP | 16374140 | 0.4872  | 0.1694  | 1.8884  |
| CHB | NPIP | 16379140 | 0       | 0       | 0       |
| CHB | NPIP | 16384140 | 0.1611  | 0.1694  | -0.0493 |
| CHB | NPIP | 16389140 | 0.1611  | 0.1694  | -0.0493 |
| CHB | NPIP | 16394140 | 0       | 0       | 0       |
| CHB | NPIP | 16399140 | 0       | 0       | 0       |
| CHB | NPIP | 16404140 | 0       | 0       | 0       |
| CHB | NPIP | 16409140 | 0       | 0       | 0       |
| CHB | NPIP | 16414140 | 0.8506  | 1.0165  | -0.3302 |
| CHB | NPIP | 16419140 | 1.3838  | 1.6942  | -0.426  |
| CHB | NPIP | 16424140 | 0.6967  | 1.8636  | -1.4888 |

## 2\_TajimasD\_data

|     |      |          |         |         |         |
|-----|------|----------|---------|---------|---------|
| CHB | NPIP | 16429140 | 0.1732  | 1.3553  | -1.9158 |
| CHB | NPIP | 16434140 | 0.0097  | 0.1694  | -0.949  |
| CHB | NPIP | 16439140 | 0       | 0       | 0       |
| CHB | NPIP | 16444140 | 0       | 0       | 0       |
| CHB | NPIP | 16449140 | 1.5366  | 2.033   | -0.592  |
| CHB | NPIP | 16454140 | 1.6967  | 2.8801  | -1.067  |
| CHB | NPIP | 16459140 | 0.4116  | 4.066   | -2.4643 |
| CHB | NPIP | 16464140 | 1.5842  | 4.7436  | -1.8637 |
| CHB | NPIP | 16469140 | 1.3328  | 1.5247  | -0.2851 |
| CHB | NPIP | 16474140 | 0       | 0       | 0       |
| CHB | NPIP | 16479140 | 0.1321  | 0.5082  | -1.1806 |
| CHB | NPIP | 16484140 | 0.1321  | 0.5082  | -1.1806 |
| CHB | NPIP | 16489140 | 0.0377  | 0.1694  | -0.7826 |
| CHB | NPIP | 16494140 | 0.565   | 0.6777  | -0.2946 |
| CHB | NPIP | 16499140 | 0.8104  | 1.0165  | -0.4102 |
| CHB | NPIP | 16504140 | 0.2831  | 0.5082  | -0.7066 |
| CHB | NPIP | 16509140 | 2.1732  | 1.5247  | 0.9634  |
| CHB | NPIP | 16514140 | 4.0927  | 3.3883  | 0.5547  |
| CHB | NPIP | 16519140 | 1.968   | 2.7106  | -0.7037 |
| CHB | NPIP | 16524140 | 0.1797  | 1.5247  | -1.9982 |
| CHB | NPIP | 16529140 | 0.6353  | 0.8471  | -0.4776 |
| CHB | NPIP | 16534140 | 2.8016  | 1.5247  | 1.897   |
| CHB | NPIP | 16539140 | 4.1858  | 3.2189  | 0.7949  |
| CHB | NPIP | 16544140 | 3.5146  | 3.5577  | -0.0326 |
| CHB | NPIP | 16549140 | 2.2024  | 2.5412  | -0.3383 |
| CHB | NPIP | 16554140 | 3.5644  | 2.7106  | 0.809   |
| CHB | NPIP | 16559140 | 5.7912  | 4.7436  | 0.618   |
| CHB | NPIP | 16564140 | 7.1348  | 6.7766  | 0.1538  |
| CHB | NPIP | 16569140 | 8.8035  | 6.7766  | 0.8701  |
| CHB | NPIP | 16574140 | 6.9334  | 4.7436  | 1.2917  |
| CHB | NPIP | 16579140 | 4.1127  | 3.0495  | 0.9144  |
| CHB | NPIP | 16584140 | 5.071   | 4.4048  | 0.4192  |
| CHB | NPIP | 16589140 | 5.036   | 4.4048  | 0.3972  |
| CHB | NPIP | 16594140 | 2.6037  | 1.8636  | 0.9443  |
| CHB | NPIP | 16599140 | 1.0449  | 1.0165  | 0.0565  |
| CHB | NPIP | 16604140 | 1.0272  | 1.1859  | -0.2833 |
| CHB | NPIP | 16609140 | 1.0088  | 1.1859  | -0.3161 |
| CHB | NPIP | 16614140 | 2.0838  | 2.2024  | -0.1328 |
| CHB | NPIP | 16619140 | 4.3634  | 4.066   | 0.2005  |
| CHB | NPIP | 16624140 | 5.7997  | 4.7436  | 0.623   |
| CHB | NPIP | 16629140 | 12.985  | 8.1319  | 1.764   |
| CHB | NPIP | 16634140 | 19.2001 | 10.8426 | 2.3259  |
| CHB | NPIP | 16639140 | 14.8542 | 10.5037 | 1.2473  |
| CHB | NPIP | 16644140 | 11.8626 | 10.5037 | 0.3896  |
| CHB | NPIP | 16649140 | 8.0944  | 8.4708  | -0.1318 |
| CHB | NPIP | 16654140 | 4.3308  | 7.4543  | -1.2295 |
| CHB | NPIP | 16659140 | 3.9812  | 7.6237  | -1.4046 |
| CHB | NPIP | 16664140 | 1.9572  | 5.5907  | -1.8539 |
| CHB | NPIP | 16669140 | 4.9391  | 6.4378  | -0.6739 |

## 2\_TajimasD\_data

|     |      |          |         |         |         |
|-----|------|----------|---------|---------|---------|
| CHB | NPIP | 16674140 | 8.3569  | 13.7226 | -1.1959 |
| CHB | NPIP | 16679140 | 8.6528  | 15.2474 | -1.3297 |
| CHB | NPIP | 16684140 | 8.5743  | 10.6731 | -0.5928 |
| CHB | NPIP | 16689140 | 6.2229  | 7.2848  | -0.4268 |
| CHB | NPIP | 16694140 | 7.9657  | 6.7766  | 0.5104  |
| CHB | NPIP | 16699140 | 8.9916  | 7.4543  | 0.6051  |
| CHB | NPIP | 16704140 | 5.7556  | 5.7601  | -0.0022 |
| CHB | NPIP | 16709140 | 7.2677  | 6.4378  | 0.3732  |
| CHB | NPIP | 16714140 | 9.1226  | 7.7931  | 0.5025  |
| CHB | NPIP | 16719140 | 6.372   | 6.2684  | 0.0477  |
| CHB | NPIP | 16724140 | 5.7445  | 6.6072  | -0.3789 |
| CHB | NPIP | 16729140 | 7.6172  | 11.012  | -0.9312 |
| CHB | NPIP | 16734140 | 6.2463  | 9.3178  | -0.9845 |
| CHB | NPIP | 16739140 | 4.754   | 5.2519  | -0.2685 |
| CHB | NPIP | 16744140 | 5.6465  | 4.913   | 0.4196  |
| CHB | NPIP | 16749140 | 10.419  | 5.5907  | 2.4635  |
| CHB | NPIP | 16754140 | 8.6731  | 4.913   | 2.1508  |
| CHB | NPIP | 16759140 | 2.9654  | 2.3718  | 0.6266  |
| CHB | NPIP | 16764140 | 1.7179  | 1.1859  | 0.9496  |
| CHB | NPIP | 16769140 | 1.2303  | 1.5247  | -0.4374 |
| CHB | NPIP | 16774140 | 1.8915  | 2.033   | -0.1687 |
| CHB | NPIP | 16779140 | 5.3139  | 4.2354  | 0.7021  |
| CHB | NPIP | 16784140 | 6.6077  | 6.0989  | 0.2402  |
| CHB | NPIP | 16789140 | 3.1392  | 3.7271  | -0.4271 |
| CHB | NPIP | 16794140 | 3.1234  | 3.2189  | -0.0785 |
| CHB | NPIP | 16799140 | 3.9183  | 3.0495  | 0.7472  |
| CHB | NPIP | 16804140 | 2.6225  | 1.5247  | 1.6309  |
| CHB | NPIP | 16809140 | 4.9785  | 2.7106  | 2.149   |
| CHB | NPIP | 16814140 | 3.8355  | 2.033   | 2.1495  |
| CHB | NPIP | 16819140 | 0.945   | 0.8471  | 0.2208  |
| CHB | NPIP | 16824140 | 1.1443  | 1.0165  | 0.2543  |
| CHB | NPIP | 16829140 | 5.0453  | 3.5577  | 1.1243  |
| CHB | NPIP | 16834140 | 9.6547  | 6.6072  | 1.3385  |
| CHB | NPIP | 16839140 | 8.7853  | 6.6072  | 0.9566  |
| CHB | NPIP | 16844140 | 10.3429 | 8.8096  | 0.5177  |
| CHB | NPIP | 16849140 | 12.4847 | 10.5037 | 0.5679  |
| CHB | NPIP | 16854140 | 10.0366 | 11.8591 | -0.4663 |
| CHB | NPIP | 16859140 | 7.2663  | 13.2144 | -1.374  |
| CHB | NPIP | 16864140 | 13.1018 | 13.045  | 0.0133  |
| CHB | NPIP | 16869140 | 18.9485 | 15.0779 | 0.7888  |
| CHB | NPIP | 16874140 | 12.5293 | 12.1979 | 0.0826  |
| CHB | NPIP | 16879140 | 5.965   | 7.2848  | -0.5305 |
| CHB | NPIP | 16884140 | 5.0891  | 7.1154  | -0.8321 |
| YRI | NPIP | 15884140 | 18.0708 | 21.512  | -0.497  |
| YRI | NPIP | 15889140 | 17.5142 | 20.5036 | -0.4522 |
| YRI | NPIP | 15894140 | 14.722  | 18.1507 | -0.5832 |
| YRI | NPIP | 15899140 | 17.4581 | 19.3272 | -0.2993 |
| YRI | NPIP | 15904140 | 18.5016 | 19.9994 | -0.2321 |
| YRI | NPIP | 15909140 | 20.4765 | 24.5371 | -0.5163 |

## 2\_TajimasD\_data

|     |      |          |         |         |         |
|-----|------|----------|---------|---------|---------|
| YRI | NPIP | 15914140 | 29.079  | 30.0831 | -0.1047 |
| YRI | NPIP | 15919140 | 26.5232 | 25.7135 | 0.0984  |
| YRI | NPIP | 15924140 | 18.7485 | 18.6549 | 0.0155  |
| YRI | NPIP | 15929140 | 19.1627 | 19.3272 | -0.0263 |
| YRI | NPIP | 15934140 | 14.9483 | 18.6549 | -0.6141 |
| YRI | NPIP | 15939140 | 11.9114 | 16.8062 | -0.8963 |
| YRI | NPIP | 15944140 | 11.2863 | 17.1423 | -1.0521 |
| YRI | NPIP | 15949140 | 13.0608 | 18.6549 | -0.9268 |
| YRI | NPIP | 15954140 | 14.9784 | 17.3104 | -0.4151 |
| YRI | NPIP | 15959140 | 20.7559 | 20.3355 | 0.0641  |
| YRI | NPIP | 15964140 | 25.4491 | 23.6968 | 0.2305  |
| YRI | NPIP | 15969140 | 22.0792 | 22.6884 | -0.0836 |
| YRI | NPIP | 15974140 | 26.8721 | 25.0413 | 0.2282  |
| YRI | NPIP | 15979140 | 31.0684 | 22.6884 | 1.1495  |
| YRI | NPIP | 15984140 | 21.698  | 15.9659 | 1.1024  |
| YRI | NPIP | 15989140 | 11.6532 | 13.613  | -0.4386 |
| YRI | NPIP | 15994140 | 10.4288 | 14.9575 | -0.9268 |
| YRI | NPIP | 15999140 | 12.9996 | 17.6465 | -0.812  |
| YRI | NPIP | 16004140 | 13.4615 | 18.823  | -0.8806 |
| YRI | NPIP | 16009140 | 12.0649 | 18.6549 | -1.0917 |
| YRI | NPIP | 16014140 | 9.6254  | 13.9492 | -0.9456 |
| YRI | NPIP | 16019140 | 8.8377  | 14.6214 | -1.2096 |
| YRI | NPIP | 16024140 | 9.6237  | 15.6298 | -1.1787 |
| YRI | NPIP | 16029140 | 7.9059  | 12.7727 | -1.157  |
| YRI | NPIP | 16034140 | 9.2153  | 13.9492 | -1.0353 |
| YRI | NPIP | 16039140 | 11.3651 | 14.1172 | -0.5951 |
| YRI | NPIP | 16044140 | 11.414  | 15.1256 | -0.7516 |
| YRI | NPIP | 16049140 | 11.6359 | 13.2769 | -0.3761 |
| YRI | NPIP | 16054140 | 10.8195 | 13.445  | -0.5946 |
| YRI | NPIP | 16059140 | 13.7079 | 18.1507 | -0.7557 |
| YRI | NPIP | 16064140 | 15.8378 | 19.1591 | -0.5363 |
| YRI | NPIP | 16069140 | 15.4424 | 17.9827 | -0.4359 |
| YRI | NPIP | 16074140 | 18.7895 | 19.1591 | -0.0597 |
| YRI | NPIP | 16079140 | 19.2183 | 20.3355 | -0.1703 |
| YRI | NPIP | 16084140 | 17.2829 | 18.991  | -0.2782 |
| YRI | NPIP | 16089140 | 15.4802 | 17.6465 | -0.3786 |
| YRI | NPIP | 16094140 | 24.4904 | 21.0078 | 0.5146  |
| YRI | NPIP | 16099140 | 28.7818 | 21.8481 | 0.9864  |
| YRI | NPIP | 16104140 | 34.1555 | 22.6884 | 1.5729  |
| YRI | NPIP | 16109140 | 28.5013 | 18.1507 | 1.7605  |
| YRI | NPIP | 16114140 | 12.3226 | 12.2685 | 0.0134  |
| YRI | NPIP | 16119140 | 11.0135 | 12.6047 | -0.383  |
| YRI | NPIP | 16124140 | 11.1984 | 13.1089 | -0.4432 |
| YRI | NPIP | 16129140 | 15.1141 | 15.2937 | -0.036  |
| YRI | NPIP | 16134140 | 15.8947 | 17.1423 | -0.2242 |
| YRI | NPIP | 16139140 | 13.8688 | 17.8146 | -0.6833 |
| YRI | NPIP | 16144140 | 13.8439 | 18.1507 | -0.7325 |
| YRI | NPIP | 16149140 | 12.7197 | 17.6465 | -0.8609 |
| YRI | NPIP | 16154140 | 10.7182 | 16.134  | -1.0312 |

## 2\_TajimasD\_data

|     |      |          |         |         |         |
|-----|------|----------|---------|---------|---------|
| YRI | NPIP | 16159140 | 14.4683 | 18.1507 | -0.6263 |
| YRI | NPIP | 16164140 | 15.5814 | 17.4785 | -0.3346 |
| YRI | NPIP | 16169140 | 15.6542 | 17.3104 | -0.2948 |
| YRI | NPIP | 16174140 | 15.485  | 17.4785 | -0.3516 |
| YRI | NPIP | 16179140 | 14.2434 | 16.134  | -0.36   |
| YRI | NPIP | 16184140 | 14.239  | 17.6465 | -0.5954 |
| YRI | NPIP | 16189140 | 10.4141 | 16.6382 | -1.1507 |
| YRI | NPIP | 16194140 | 14.8744 | 22.0162 | -1.0085 |
| YRI | NPIP | 16199140 | 20.7467 | 23.3606 | -0.3486 |
| YRI | NPIP | 16204140 | 21.8414 | 20.5036 | 0.2024  |
| YRI | NPIP | 16209140 | 17.0299 | 19.1591 | -0.3438 |
| YRI | NPIP | 16214140 | 7.5422  | 14.2853 | -1.4417 |
| YRI | NPIP | 16219140 | 6.5707  | 13.9492 | -1.6137 |
| YRI | NPIP | 16224140 | 9.8666  | 15.4617 | -1.1095 |
| YRI | NPIP | 16229140 | 10.6051 | 14.9575 | -0.8908 |
| YRI | NPIP | 16234140 | 9.6894  | 13.7811 | -0.9052 |
| YRI | NPIP | 16239140 | 9.5431  | 15.9659 | -1.2352 |
| YRI | NPIP | 16244140 | 10.3699 | 18.1507 | -1.3234 |
| YRI | NPIP | 16249140 | 10.2651 | 16.302  | -1.1381 |
| YRI | NPIP | 16254140 | 9.5415  | 14.6214 | -1.0624 |
| YRI | NPIP | 16259140 | 16.4836 | 17.6465 | -0.2032 |
| YRI | NPIP | 16264140 | 19.1194 | 18.6549 | 0.077   |
| YRI | NPIP | 16269140 | 14.5924 | 15.7978 | -0.2342 |
| YRI | NPIP | 16274140 | 17.1784 | 18.6549 | -0.2446 |
| YRI | NPIP | 16279140 | 17.2132 | 19.3272 | -0.3385 |
| YRI | NPIP | 16284140 | 19.4179 | 20.3355 | -0.1399 |
| YRI | NPIP | 16289140 | 25.7945 | 22.0162 | 0.5336  |
| YRI | NPIP | 16294140 | 19.3329 | 16.8062 | 0.4627  |
| YRI | NPIP | 16299140 | 8.4485  | 13.9492 | -1.203  |
| YRI | NPIP | 16304140 | 5.8704  | 14.4534 | -1.8148 |
| YRI | NPIP | 16309140 | 5.676   | 11.7644 | -1.5641 |
| YRI | NPIP | 16314140 | 3.8588  | 7.8989  | -1.503  |
| YRI | NPIP | 16319140 | 3.305   | 7.7309  | -1.6793 |
| YRI | NPIP | 16324140 | 5.6777  | 10.4199 | -1.3651 |
| YRI | NPIP | 16329140 | 5.3576  | 9.7476  | -1.3448 |
| YRI | NPIP | 16334140 | 3.7777  | 6.5544  | -1.2242 |
| YRI | NPIP | 16339140 | 3.1029  | 5.0419  | -1.0804 |
| YRI | NPIP | 16344140 | 2.2836  | 5.0419  | -1.5368 |
| YRI | NPIP | 16349140 | 4.5102  | 7.8989  | -1.2607 |
| YRI | NPIP | 16354140 | 6.0961  | 10.756  | -1.3022 |
| YRI | NPIP | 16359140 | 6.7882  | 10.4199 | -1.0455 |
| YRI | NPIP | 16364140 | 6.0715  | 6.5544  | -0.2129 |
| YRI | NPIP | 16369140 | 2.6224  | 2.1848  | 0.4913  |
| YRI | NPIP | 16374140 | 0.4597  | 0.1681  | 1.7335  |
| YRI | NPIP | 16379140 | 0.0367  | 0.1681  | -0.7811 |
| YRI | NPIP | 16384140 | 0.3029  | 0.3361  | -0.1333 |
| YRI | NPIP | 16389140 | 0.2662  | 0.1681  | 0.5832  |
| YRI | NPIP | 16394140 | 0.0185  | 0.1681  | -0.8893 |
| YRI | NPIP | 16399140 | 0.0185  | 0.1681  | -0.8893 |

## 2\_TajimasD\_data

|     |      |          |         |         |         |
|-----|------|----------|---------|---------|---------|
| YRI | NPIP | 16404140 | 0       | 0       | 0       |
| YRI | NPIP | 16409140 | 0       | 0       | 0       |
| YRI | NPIP | 16414140 | 0.2719  | 1.6806  | -1.938  |
| YRI | NPIP | 16419140 | 1.0127  | 2.8571  | -1.668  |
| YRI | NPIP | 16424140 | 1.2003  | 3.0251  | -1.5742 |
| YRI | NPIP | 16429140 | 0.496   | 2.0167  | -1.8182 |
| YRI | NPIP | 16434140 | 0.0549  | 0.3361  | -1.1289 |
| YRI | NPIP | 16439140 | 0.0183  | 0.1681  | -0.8905 |
| YRI | NPIP | 16444140 | 0.055   | 0.5042  | -1.4117 |
| YRI | NPIP | 16449140 | 1.306   | 3.0251  | -1.483  |
| YRI | NPIP | 16454140 | 1.5228  | 4.2016  | -1.7499 |
| YRI | NPIP | 16459140 | 1.5095  | 7.3947  | -2.3256 |
| YRI | NPIP | 16464140 | 2.5358  | 10.2518 | -2.2552 |
| YRI | NPIP | 16469140 | 1.326   | 4.8738  | -2.0365 |
| YRI | NPIP | 16474140 | 0.0278  | 0.3361  | -1.2377 |
| YRI | NPIP | 16479140 | 0.1833  | 1.6806  | -2.0598 |
| YRI | NPIP | 16484140 | 0.1833  | 1.6806  | -2.0598 |
| YRI | NPIP | 16489140 | 0       | 0       | 0       |
| YRI | NPIP | 16494140 | 0.4192  | 0.3361  | 0.3336  |
| YRI | NPIP | 16499140 | 0.6893  | 1.3445  | -1.0642 |
| YRI | NPIP | 16504140 | 0.4318  | 2.0167  | -1.895  |
| YRI | NPIP | 16509140 | 2.5108  | 3.6974  | -0.8649 |
| YRI | NPIP | 16514140 | 5.1528  | 5.5461  | -0.2014 |
| YRI | NPIP | 16519140 | 3.1363  | 4.3696  | -0.7787 |
| YRI | NPIP | 16524140 | 0.9501  | 3.6974  | -2.0024 |
| YRI | NPIP | 16529140 | 1.2094  | 3.6974  | -1.8134 |
| YRI | NPIP | 16534140 | 2.4731  | 4.3696  | -1.1975 |
| YRI | NPIP | 16539140 | 4.2505  | 5.7141  | -0.7298 |
| YRI | NPIP | 16544140 | 5.1893  | 5.7141  | -0.2617 |
| YRI | NPIP | 16549140 | 3.5728  | 4.2016  | -0.4108 |
| YRI | NPIP | 16554140 | 4.2658  | 4.3696  | -0.0655 |
| YRI | NPIP | 16559140 | 6.8244  | 8.5712  | -0.6028 |
| YRI | NPIP | 16564140 | 7.9441  | 11.2602 | -0.8877 |
| YRI | NPIP | 16569140 | 9.3415  | 8.7392  | 0.2042  |
| YRI | NPIP | 16574140 | 7.6621  | 6.0502  | 0.7637  |
| YRI | NPIP | 16579140 | 5.1989  | 5.0419  | 0.0875  |
| YRI | NPIP | 16584140 | 4.6147  | 5.378   | -0.4017 |
| YRI | NPIP | 16589140 | 4.0275  | 4.7057  | -0.4015 |
| YRI | NPIP | 16594140 | 2.4984  | 2.5209  | -0.0225 |
| YRI | NPIP | 16599140 | 1.0444  | 1.8487  | -1.0288 |
| YRI | NPIP | 16604140 | 1.1245  | 2.3529  | -1.3003 |
| YRI | NPIP | 16609140 | 1.0302  | 2.689   | -1.5765 |
| YRI | NPIP | 16614140 | 2.2476  | 3.5293  | -0.9718 |
| YRI | NPIP | 16619140 | 5.1447  | 5.5461  | -0.2056 |
| YRI | NPIP | 16624140 | 6.5276  | 6.8906  | -0.153  |
| YRI | NPIP | 16629140 | 12.8829 | 12.6047 | 0.067   |
| YRI | NPIP | 16634140 | 19.1283 | 15.7978 | 0.647   |
| YRI | NPIP | 16639140 | 16.0073 | 14.6214 | 0.2898  |
| YRI | NPIP | 16644140 | 13.6968 | 15.6298 | -0.3794 |

## 2\_TajimasD\_data

|     |      |          |         |         |         |
|-----|------|----------|---------|---------|---------|
| YRI | NPIP | 16649140 | 9.3854  | 12.6047 | -0.775  |
| YRI | NPIP | 16654140 | 6.1336  | 11.0921 | -1.3463 |
| YRI | NPIP | 16659140 | 6.6309  | 11.4282 | -1.2665 |
| YRI | NPIP | 16664140 | 4.1711  | 9.5795  | -1.6838 |
| YRI | NPIP | 16669140 | 5.7267  | 12.4366 | -1.6359 |
| YRI | NPIP | 16674140 | 9.9573  | 19.6633 | -1.5286 |
| YRI | NPIP | 16679140 | 10.5215 | 19.1591 | -1.3947 |
| YRI | NPIP | 16684140 | 8.2577  | 13.7811 | -1.2219 |
| YRI | NPIP | 16689140 | 6.2356  | 12.7727 | -1.5541 |
| YRI | NPIP | 16694140 | 8.0157  | 13.1089 | -1.1814 |
| YRI | NPIP | 16699140 | 8.6165  | 11.5963 | -0.776  |
| YRI | NPIP | 16704140 | 6.3602  | 8.9073  | -0.8483 |
| YRI | NPIP | 16709140 | 9.2535  | 10.0837 | -0.2464 |
| YRI | NPIP | 16714140 | 10.2209 | 11.4282 | -0.3187 |
| YRI | NPIP | 16719140 | 6.1983  | 10.5879 | -1.2449 |
| YRI | NPIP | 16724140 | 8.4839  | 13.613  | -1.148  |
| YRI | NPIP | 16729140 | 15.0462 | 21.1758 | -0.8988 |
| YRI | NPIP | 16734140 | 11.4951 | 16.302  | -0.9062 |
| YRI | NPIP | 16739140 | 6.0613  | 6.7225  | -0.2849 |
| YRI | NPIP | 16744140 | 6.8471  | 7.5628  | -0.2771 |
| YRI | NPIP | 16749140 | 10.4311 | 8.067   | 0.8627  |
| YRI | NPIP | 16754140 | 10.1762 | 7.5628  | 1.0117  |
| YRI | NPIP | 16759140 | 4.7911  | 5.8822  | -0.5302 |
| YRI | NPIP | 16764140 | 1.7041  | 2.5209  | -0.818  |
| YRI | NPIP | 16769140 | 1.4652  | 3.0251  | -1.3457 |
| YRI | NPIP | 16774140 | 2.2704  | 4.3696  | -1.3255 |
| YRI | NPIP | 16779140 | 5.4029  | 6.0502  | -0.3067 |
| YRI | NPIP | 16784140 | 7.276   | 7.5628  | -0.111  |
| YRI | NPIP | 16789140 | 4.1063  | 5.0419  | -0.5213 |
| YRI | NPIP | 16794140 | 5.957   | 6.8906  | -0.3934 |
| YRI | NPIP | 16799140 | 6.2035  | 6.3864  | -0.0825 |
| YRI | NPIP | 16804140 | 2.1726  | 2.8571  | -0.619  |
| YRI | NPIP | 16809140 | 4.2316  | 4.8738  | -0.3686 |
| YRI | NPIP | 16814140 | 3.8451  | 3.5293  | 0.2394  |
| YRI | NPIP | 16819140 | 1.3106  | 1.3445  | -0.0551 |
| YRI | NPIP | 16824140 | 1.4138  | 1.5126  | -0.1471 |
| YRI | NPIP | 16829140 | 5.2751  | 6.8906  | -0.6807 |
| YRI | NPIP | 16834140 | 9.7006  | 12.1005 | -0.6004 |
| YRI | NPIP | 16839140 | 9.5884  | 9.9157  | -0.0987 |
| YRI | NPIP | 16844140 | 11.954  | 12.2685 | -0.0777 |
| YRI | NPIP | 16849140 | 14.2603 | 15.1256 | -0.1752 |
| YRI | NPIP | 16854140 | 13.0683 | 14.6214 | -0.3248 |
| YRI | NPIP | 16859140 | 10.3606 | 14.9575 | -0.9408 |
| YRI | NPIP | 16864140 | 13.4835 | 15.6298 | -0.4212 |
| YRI | NPIP | 16869140 | 18.6806 | 17.6465 | 0.1807  |
| YRI | NPIP | 16874140 | 13.6716 | 14.6214 | -0.1986 |
| YRI | NPIP | 16879140 | 7.6731  | 10.0837 | -0.7155 |
| YRI | NPIP | 16884140 | 8.0979  | 11.5963 | -0.911  |
| CEU | NPIP | 17822919 | 10.859  | 9.5515  | 0.4108  |



## 2\_TajimasD\_data

|     |      |          |         |         |         |
|-----|------|----------|---------|---------|---------|
| CEU | NPIP | 17827919 | 15.765  | 11.4277 | 1.1523  |
| CEU | NPIP | 17832919 | 14.0891 | 10.7454 | 0.9412  |
| CEU | NPIP | 17837919 | 9.1812  | 8.8692  | 0.105   |
| CEU | NPIP | 17842919 | 9.9728  | 8.8692  | 0.3714  |
| CEU | NPIP | 17847919 | 18.7135 | 11.5982 | 1.8643  |
| CEU | NPIP | 17852919 | 19.645  | 12.1099 | 1.8956  |
| CEU | NPIP | 17857919 | 14.022  | 10.2337 | 1.1161  |
| CEU | NPIP | 17862919 | 13.7381 | 9.0398  | 1.5534  |
| CEU | NPIP | 17867919 | 12.812  | 8.8692  | 1.3268  |
| CEU | NPIP | 17872919 | 13.303  | 7.5047  | 2.275   |
| CEU | NPIP | 17877919 | 12.2284 | 8.3576  | 1.376   |
| CEU | NPIP | 17882919 | 9.9029  | 10.0632 | -0.048  |
| CEU | NPIP | 17887919 | 11.1699 | 9.7221  | 0.4474  |
| CEU | NPIP | 17892919 | 15.2152 | 11.5982 | 0.9477  |
| CEU | NPIP | 17897919 | 16.0478 | 12.1099 | 0.9907  |
| CEU | NPIP | 17902919 | 14.115  | 9.8926  | 1.2839  |
| CEU | NPIP | 17907919 | 14.3469 | 9.2104  | 1.6691  |
| CEU | NPIP | 17912919 | 17.8064 | 11.0866 | 1.8368  |
| CEU | NPIP | 17917919 | 18.9641 | 13.1333 | 1.3587  |
| CEU | NPIP | 17922919 | 17.7227 | 14.6684 | 0.6408  |
| CEU | NPIP | 17927919 | 16.4364 | 16.8857 | -0.0824 |
| CEU | NPIP | 17932919 | 19.5986 | 21.832  | -0.3199 |
| CEU | NPIP | 17937919 | 20.6615 | 20.8086 | -0.0221 |
| CEU | NPIP | 17942919 | 14.4303 | 13.4744 | 0.2174  |
| CEU | NPIP | 17947919 | 12.4052 | 13.645  | -0.2786 |
| CEU | NPIP | 17952919 | 11.5191 | 15.8623 | -0.8457 |
| CEU | NPIP | 17957919 | 9.4663  | 14.4978 | -1.0674 |
| CEU | NPIP | 17962919 | 9.9048  | 12.6216 | -0.6573 |
| CEU | NPIP | 17967919 | 9.5927  | 10.2337 | -0.1888 |
| CEU | NPIP | 17972919 | 7.0377  | 8.5281  | -0.52   |
| CEU | NPIP | 17977919 | 7.531   | 10.4043 | -0.8335 |
| CEU | NPIP | 17982919 | 9.1528  | 12.7922 | -0.8694 |
| CEU | NPIP | 17987919 | 12.4212 | 12.6216 | -0.0485 |
| CEU | NPIP | 17992919 | 20.6984 | 12.6216 | 1.9541  |
| CEU | NPIP | 17997919 | 21.6193 | 12.4511 | 2.2468  |
| CEU | NPIP | 18002919 | 18.7666 | 12.1099 | 1.6746  |
| CEU | NPIP | 18007919 | 13.4001 | 9.5515  | 1.2091  |
| CEU | NPIP | 18012919 | 7.475   | 7.6753  | -0.077  |
| CEU | NPIP | 18017919 | 8.0262  | 7.3342  | 0.2773  |
| CEU | NPIP | 18022919 | 10.7807 | 8.3576  | 0.8613  |
| CEU | NPIP | 18027919 | 9.0763  | 8.187   | 0.3222  |
| CEU | NPIP | 18032919 | 4.1509  | 5.9697  | -0.8778 |
| CEU | NPIP | 18037919 | 3.8802  | 6.3108  | -1.1159 |
| CEU | NPIP | 18042919 | 7.4451  | 8.0164  | -0.211  |
| CEU | NPIP | 18047919 | 8.7798  | 8.6987  | 0.0278  |
| CEU | NPIP | 18052919 | 7.6042  | 12.4511 | -1.1878 |
| CEU | NPIP | 18057919 | 6.6865  | 12.6216 | -1.4359 |
| CEU | NPIP | 18062919 | 3.8227  | 6.4814  | -1.1917 |
| CEU | NPIP | 18067919 | 6.3255  | 6.1402  | 0.0872  |

## 2\_TajimasD\_data

|     |      |          |         |         |         |
|-----|------|----------|---------|---------|---------|
| CEU | NPIP | 18072919 | 8.2872  | 7.3342  | 0.3818  |
| CEU | NPIP | 18077919 | 4.5821  | 5.6286  | -0.5323 |
| CEU | NPIP | 18082919 | 3.0552  | 4.7757  | -1.0119 |
| CEU | NPIP | 18087919 | 3.3766  | 4.7757  | -0.8229 |
| CEU | NPIP | 18092919 | 4.4275  | 5.1169  | -0.3816 |
| CEU | NPIP | 18097919 | 4.8033  | 5.7991  | -0.4932 |
| CEU | NPIP | 18102919 | 4.9944  | 5.6286  | -0.3226 |
| CEU | NPIP | 18107919 | 10.221  | 8.6987  | 0.5215  |
| CEU | NPIP | 18112919 | 11.7928 | 11.4277 | 0.097   |
| CEU | NPIP | 18117919 | 6.858   | 10.4043 | -1.0288 |
| CEU | NPIP | 18122919 | 7.926   | 8.8692  | -0.3174 |
| CEU | NPIP | 18127919 | 10.8    | 8.8692  | 0.6497  |
| CEU | NPIP | 18132919 | 12.3838 | 12.4511 | -0.0165 |
| CEU | NPIP | 18137919 | 12.7598 | 11.7688 | 0.2561  |
| CEU | NPIP | 18142919 | 11.2187 | 8.3576  | 1.017   |
| CEU | NPIP | 18147919 | 15.3067 | 11.0866 | 1.1536  |
| CEU | NPIP | 18152919 | 18.3933 | 14.1567 | 0.9194  |
| CEU | NPIP | 18157919 | 12.4725 | 12.9627 | -0.1156 |
| CEU | NPIP | 18162919 | 6.1532  | 9.2104  | -0.9934 |
| CEU | NPIP | 18167919 | 10.2259 | 8.3576  | 0.6641  |
| CEU | NPIP | 18172919 | 13.4014 | 9.3809  | 1.2844  |
| CEU | NPIP | 18177919 | 9.8192  | 8.3576  | 0.5196  |
| CEU | NPIP | 18182919 | 7.7462  | 6.9931  | 0.3151  |
| CEU | NPIP | 18187919 | 4.5345  | 4.2641  | 0.1755  |
| CEU | NPIP | 18192919 | 4.4857  | 4.0935  | 0.2637  |
| CEU | NPIP | 18197919 | 5.7685  | 5.1169  | 0.3607  |
| CEU | NPIP | 18202919 | 3.133   | 3.0701  | 0.054   |
| CEU | NPIP | 18207919 | 3.7231  | 4.4346  | -0.4464 |
| CEU | NPIP | 18212919 | 5.2344  | 5.7991  | -0.2797 |
| CEU | NPIP | 18217919 | 3.223   | 2.5584  | 0.6621  |
| CEU | NPIP | 18222919 | 3.8792  | 2.2173  | 1.8566  |
| CEU | NPIP | 18227919 | 10.2727 | 5.2874  | 2.6806  |
| CEU | NPIP | 18232919 | 16.8819 | 9.0398  | 2.5928  |
| CEU | NPIP | 18237919 | 14.8586 | 8.6987  | 2.1104  |
| CEU | NPIP | 18242919 | 10.1864 | 6.6519  | 1.5475  |
| CEU | NPIP | 18247919 | 11.2113 | 8.5281  | 0.9362  |
| CEU | NPIP | 18252919 | 13.1147 | 12.9627 | 0.0359  |
| CEU | NPIP | 18257919 | 11.3431 | 13.3039 | -0.4513 |
| CEU | NPIP | 18262919 | 12.4224 | 10.7454 | 0.472   |
| CEU | NPIP | 18267919 | 10.2865 | 8.0164  | 0.8385  |
| CEU | NPIP | 18272919 | 4.7864  | 4.0935  | 0.4659  |
| CEU | NPIP | 18277919 | 4.2375  | 2.729   | 1.4259  |
| CEU | NPIP | 18282919 | 7.6549  | 4.2641  | 2.2011  |
| CEU | NPIP | 18287919 | 11.5884 | 7.1636  | 1.8113  |
| CEU | NPIP | 18292919 | 10.9708 | 9.2104  | 0.572   |
| CEU | NPIP | 18297919 | 7.9567  | 7.8459  | 0.0417  |
| CEU | NPIP | 18302919 | 7.3537  | 7.3342  | 0.0078  |
| CEU | NPIP | 18307919 | 8.885   | 8.8692  | 0.0053  |
| CEU | NPIP | 18312919 | 9.3014  | 9.5515  | -0.0786 |

## 2\_TajimasD\_data

|     |      |          |        |        |         |
|-----|------|----------|--------|--------|---------|
| CEU | NPIP | 18317919 | 6.0992 | 6.9931 | -0.374  |
| CEU | NPIP | 18322919 | 6.7287 | 5.6286 | 0.5596  |
| CEU | NPIP | 18327919 | 7.9806 | 7.3342 | 0.259   |
| CEU | NPIP | 18332919 | 4.3728 | 5.6286 | -0.6388 |
| CEU | NPIP | 18337919 | 6.5864 | 5.9697 | 0.2976  |
| CEU | NPIP | 18342919 | 5.5749 | 5.458  | 0.0611  |
| CEU | NPIP | 18347919 | 4.5269 | 4.0935 | 0.2914  |
| CEU | NPIP | 18352919 | 7.6298 | 5.1169 | 1.3909  |
| CEU | NPIP | 18357919 | 5.2078 | 4.6052 | 0.3659  |
| CEU | NPIP | 18362919 | 2.5525 | 3.5818 | -0.7758 |
| CEU | NPIP | 18367919 | 2.3206 | 2.729  | -0.386  |
| CEU | NPIP | 18372919 | 1.8677 | 2.3879 | -0.5478 |
| CEU | NPIP | 18377919 | 1.6155 | 2.8996 | -1.1548 |
| CEU | NPIP | 18382919 | 0.7405 | 3.2407 | -2.0501 |
| CEU | NPIP | 18387919 | 0.3206 | 2.0467 | -2.0539 |
| CEU | NPIP | 18392919 | 0.142  | 0.3411 | -0.7981 |
| CEU | NPIP | 18397919 | 0.0404 | 0.6822 | -1.6759 |
| CEU | NPIP | 18402919 | 0.4613 | 2.0467 | -1.8865 |
| CEU | NPIP | 18407919 | 0.7108 | 2.2173 | -1.683  |
| CEU | NPIP | 18412919 | 0.2898 | 0.8528 | -1.2679 |
| CEU | NPIP | 18417919 | 0.1262 | 0.3411 | -0.8615 |
| CEU | NPIP | 18422919 | 0.1262 | 0.3411 | -0.8615 |
| CEU | NPIP | 18427919 | 0.357  | 0.5117 | -0.4852 |
| CEU | NPIP | 18432919 | 0.6836 | 1.0234 | -0.6752 |
| CEU | NPIP | 18437919 | 0.5772 | 0.8528 | -0.6206 |
| CEU | NPIP | 18442919 | 0.2507 | 0.3411 | -0.3624 |
| CEU | NPIP | 18447919 | 0.3313 | 0.1706 | 0.9546  |
| CEU | NPIP | 18452919 | 0.3313 | 0.1706 | 0.9546  |
| CEU | NPIP | 18457919 | 0      | 0.1706 | -1.0134 |
| CEU | NPIP | 18462919 | 0.0404 | 0.6822 | -1.6759 |
| CEU | NPIP | 18467919 | 0.281  | 1.8762 | -2.031  |
| CEU | NPIP | 18472919 | 0.9639 | 2.3879 | -1.4996 |
| CEU | NPIP | 18477919 | 0.824  | 2.2173 | -1.5566 |
| CEU | NPIP | 18482919 | 0.7213 | 2.2173 | -1.6713 |
| CEU | NPIP | 18487919 | 0.8023 | 1.5351 | -1.0866 |
| CEU | NPIP | 18492919 | 0.1816 | 0.5117 | -1.0353 |
| CEU | NPIP | 18497919 | 0.4832 | 0.1706 | 1.8569  |
| CEU | NPIP | 18502919 | 0.4832 | 0.1706 | 1.8569  |
| CEU | NPIP | 18507919 | 0      | 0      | 0       |
| CEU | NPIP | 18512919 | 0.2253 | 0.3411 | -0.4642 |
| CEU | NPIP | 18517919 | 0.2253 | 0.3411 | -0.4642 |
| CEU | NPIP | 18522919 | 0      | 0      | 0       |
| CEU | NPIP | 18527919 | 0.3645 | 0.3411 | 0.0938  |
| CEU | NPIP | 18532919 | 0.5007 | 1.0234 | -1.0386 |
| CEU | NPIP | 18537919 | 0.9551 | 2.8996 | -1.7487 |
| CEU | NPIP | 18542919 | 1.1736 | 4.4346 | -2.0461 |
| CEU | NPIP | 18547919 | 0.6112 | 4.0935 | -2.3416 |
| CEU | NPIP | 18552919 | 1.463  | 2.729  | -1.1966 |
| CEU | NPIP | 18557919 | 1.9582 | 2.3879 | -0.4525 |

## 2\_TajimasD\_data

|     |      |          |         |         |         |
|-----|------|----------|---------|---------|---------|
| CEU | NPIP | 18562919 | 1.1433  | 3.0701  | -1.6528 |
| CEU | NPIP | 18567919 | 1.1342  | 4.0935  | -1.9899 |
| CEU | NPIP | 18572919 | 2.7809  | 4.9463  | -1.2349 |
| CEU | NPIP | 18577919 | 3.5863  | 4.2641  | -0.44   |
| CEU | NPIP | 18582919 | 2.0954  | 4.6052  | -1.5238 |
| CEU | NPIP | 18587919 | 1.2663  | 5.1169  | -2.1314 |
| CEU | NPIP | 18592919 | 1.3851  | 5.2874  | -2.0983 |
| CEU | NPIP | 18597919 | 2.4465  | 5.2874  | -1.5276 |
| CEU | NPIP | 18602919 | 3.4298  | 5.6286  | -1.1184 |
| CEU | NPIP | 18607919 | 2.9528  | 5.2874  | -1.2553 |
| CEU | NPIP | 18612919 | 2.4596  | 3.9229  | -1.0206 |
| CEU | NPIP | 18617919 | 1.3928  | 3.0701  | -1.4388 |
| CEU | NPIP | 18622919 | 0.7638  | 2.3879  | -1.7103 |
| CEU | NPIP | 18627919 | 1.363   | 3.2407  | -1.5397 |
| CEU | NPIP | 18632919 | 1.9448  | 3.7524  | -1.3096 |
| CEU | NPIP | 18637919 | 1.1872  | 1.8762  | -0.8772 |
| CEU | NPIP | 18642919 | 0.1185  | 0.8528  | -1.6536 |
| CEU | NPIP | 18647919 | 2.8293  | 2.5584  | 0.2699  |
| CEU | NPIP | 18652919 | 2.8489  | 2.5584  | 0.2894  |
| CEU | NPIP | 18657919 | 0.06    | 0.6822  | -1.6248 |
| CEU | NPIP | 18662919 | 2.4304  | 1.8762  | 0.7056  |
| CEU | NPIP | 18667919 | 3.985   | 3.5818  | 0.3039  |
| CEU | NPIP | 18672919 | 2.941   | 3.0701  | -0.1107 |
| CEU | NPIP | 18677919 | 2.1779  | 2.5584  | -0.379  |
| CEU | NPIP | 18682919 | 1.0144  | 2.0467  | -1.2283 |
| CEU | NPIP | 18687919 | 0.5902  | 1.5351  | -1.4011 |
| CEU | NPIP | 18692919 | 0.4364  | 1.0234  | -1.1664 |
| CEU | NPIP | 18697919 | 0.665   | 0.8528  | -0.4229 |
| CEU | NPIP | 18702919 | 3.0763  | 2.3879  | 0.725   |
| CEU | NPIP | 18707919 | 3.5912  | 3.9229  | -0.2314 |
| CEU | NPIP | 18712919 | 2.777   | 3.9229  | -0.7992 |
| CEU | NPIP | 18717919 | 2.3018  | 2.8996  | -0.5376 |
| CEU | NPIP | 18722919 | 5.1093  | 4.4346  | 0.4233  |
| CEU | NPIP | 18727919 | 10.9507 | 7.8459  | 1.1696  |
| CEU | NPIP | 18732919 | 12.5461 | 8.8692  | 1.2373  |
| CEU | NPIP | 18737919 | 9.0398  | 7.6753  | 0.5245  |
| CEU | NPIP | 18742919 | 10.5582 | 9.5515  | 0.3163  |
| CEU | NPIP | 18747919 | 11.1591 | 9.0398  | 0.7007  |
| CEU | NPIP | 18752919 | 12.4846 | 7.6753  | 1.8486  |
| CEU | NPIP | 18757919 | 22.2284 | 10.5749 | 3.3296  |
| CEU | NPIP | 18762919 | 26.3115 | 13.645  | 2.8465  |
| CEU | NPIP | 18767919 | 17.6384 | 13.8156 | 0.849   |
| CEU | NPIP | 18772919 | 8.2356  | 9.5515  | -0.4134 |
| CEU | NPIP | 18777919 | 9.2968  | 8.8692  | 0.1439  |
| CEU | NPIP | 18782919 | 13.3026 | 11.2571 | 0.5512  |
| CEU | NPIP | 18787919 | 15.1878 | 11.9394 | 0.8282  |
| CEU | NPIP | 18792919 | 10.1919 | 8.6987  | 0.5116  |
| CEU | NPIP | 18797919 | 5.5469  | 6.6519  | -0.4838 |
| CEU | NPIP | 18802919 | 7.0132  | 8.0164  | -0.3705 |

## 2\_TajimasD\_data

|     |      |          |         |         |         |
|-----|------|----------|---------|---------|---------|
| CEU | NPIP | 18807919 | 6.4568  | 8.0164  | -0.576  |
| CEU | NPIP | 18812919 | 5.4232  | 7.5047  | -0.8167 |
| CEU | NPIP | 18817919 | 5.3698  | 6.6519  | -0.5613 |
| CEU | NPIP | 18822919 | 10.6195 | 9.7221  | 0.2773  |
| CEU | NPIP | 18827919 | 13.6432 | 12.4511 | 0.2921  |
| CHB | NPIP | 17822919 | 9.8745  | 12.0285 | -0.5438 |
| CHB | NPIP | 17827919 | 14.7461 | 14.5697 | 0.0371  |
| CHB | NPIP | 17832919 | 13.828  | 12.8755 | 0.2255  |
| CHB | NPIP | 17837919 | 9.9313  | 12.1979 | -0.5647 |
| CHB | NPIP | 17842919 | 11.0655 | 13.5532 | -0.561  |
| CHB | NPIP | 17847919 | 17.9692 | 14.2309 | 0.8049  |
| CHB | NPIP | 17852919 | 18.0261 | 14.9085 | 0.6422  |
| CHB | NPIP | 17857919 | 14.3179 | 15.2474 | -0.1874 |
| CHB | NPIP | 17862919 | 13.5052 | 12.5367 | 0.2351  |
| CHB | NPIP | 17867919 | 10.964  | 9.1484  | 0.592   |
| CHB | NPIP | 17872919 | 11.873  | 9.6567  | 0.6872  |
| CHB | NPIP | 17877919 | 12.3021 | 11.3508 | 0.2536  |
| CHB | NPIP | 17882919 | 9.6857  | 10.8426 | -0.322  |
| CHB | NPIP | 17887919 | 8.8854  | 9.9955  | -0.3333 |
| CHB | NPIP | 17892919 | 11.3705 | 13.2144 | -0.4259 |
| CHB | NPIP | 17897919 | 10.9482 | 14.0615 | -0.678  |
| CHB | NPIP | 17902919 | 9.8268  | 10.3343 | -0.1477 |
| CHB | NPIP | 17907919 | 13.7287 | 10.3343 | 0.9881  |
| CHB | NPIP | 17912919 | 18.1399 | 12.0285 | 1.5428  |
| CHB | NPIP | 17917919 | 18.6691 | 12.1979 | 1.6122  |
| CHB | NPIP | 17922919 | 19.3581 | 12.3673 | 1.7192  |
| CHB | NPIP | 17927919 | 22.1449 | 13.2144 | 2.0629  |
| CHB | NPIP | 17932919 | 29.6368 | 16.9415 | 2.3146  |
| CHB | NPIP | 17937919 | 31.8132 | 18.1274 | 2.3385  |
| CHB | NPIP | 17942919 | 23.3391 | 15.0779 | 1.6835  |
| CHB | NPIP | 17947919 | 16.4806 | 14.0615 | 0.5268  |
| CHB | NPIP | 17952919 | 12.3292 | 14.7391 | -0.5019 |
| CHB | NPIP | 17957919 | 9.2755  | 13.892  | -1.017  |
| CHB | NPIP | 17962919 | 9.577   | 13.2144 | -0.8402 |
| CHB | NPIP | 17967919 | 9.0626  | 11.6896 | -0.6813 |
| CHB | NPIP | 17972919 | 8.4165  | 8.979   | -0.1866 |
| CHB | NPIP | 17977919 | 10.8839 | 9.4872  | 0.4403  |
| CHB | NPIP | 17982919 | 11.9689 | 11.6896 | 0.0724  |
| CHB | NPIP | 17987919 | 14.42   | 13.045  | 0.3215  |
| CHB | NPIP | 17992919 | 22.6288 | 14.4003 | 1.7519  |
| CHB | NPIP | 17997919 | 22.8595 | 15.7556 | 1.3883  |
| CHB | NPIP | 18002919 | 19.8534 | 14.7391 | 1.065   |
| CHB | NPIP | 18007919 | 14.8841 | 10.5037 | 1.2558  |
| CHB | NPIP | 18012919 | 7.8755  | 7.4543  | 0.1658  |
| CHB | NPIP | 18017919 | 9.6581  | 7.4543  | 0.8675  |
| CHB | NPIP | 18022919 | 13.641  | 10.8426 | 0.7788  |
| CHB | NPIP | 18027919 | 10.5066 | 11.012  | -0.1386 |
| CHB | NPIP | 18032919 | 5.948   | 8.979   | -1.0055 |
| CHB | NPIP | 18037919 | 6.1812  | 8.3013  | -0.7561 |

## 2\_TajimasD\_data

|     |      |          |         |         |         |
|-----|------|----------|---------|---------|---------|
| CHB | NPIP | 18042919 | 9.7365  | 9.1484  | 0.1917  |
| CHB | NPIP | 18047919 | 11.1664 | 11.8591 | -0.1772 |
| CHB | NPIP | 18052919 | 9.7763  | 17.6192 | -1.3772 |
| CHB | NPIP | 18057919 | 8.0866  | 16.6027 | -1.583  |
| CHB | NPIP | 18062919 | 4.431   | 9.8261  | -1.6461 |
| CHB | NPIP | 18067919 | 7.9994  | 8.979   | -0.325  |
| CHB | NPIP | 18072919 | 9.6577  | 8.6402  | 0.3498  |
| CHB | NPIP | 18077919 | 5.0815  | 6.4378  | -0.6098 |
| CHB | NPIP | 18082919 | 3.9145  | 6.2684  | -1.0841 |
| CHB | NPIP | 18087919 | 3.6429  | 8.4708  | -1.6901 |
| CHB | NPIP | 18092919 | 2.8697  | 10.6731 | -2.204  |
| CHB | NPIP | 18097919 | 2.5114  | 10.5037 | -2.2914 |
| CHB | NPIP | 18102919 | 4.9962  | 7.6237  | -1.0132 |
| CHB | NPIP | 18107919 | 11.9273 | 8.8096  | 1.0526  |
| CHB | NPIP | 18112919 | 12.541  | 9.4872  | 0.9626  |
| CHB | NPIP | 18117919 | 7.3625  | 9.1484  | -0.5823 |
| CHB | NPIP | 18122919 | 8.2251  | 10.6731 | -0.6914 |
| CHB | NPIP | 18127919 | 11.0418 | 12.7061 | -0.399  |
| CHB | NPIP | 18132919 | 12.3583 | 13.7226 | -0.3041 |
| CHB | NPIP | 18137919 | 12.4337 | 12.5367 | -0.025  |
| CHB | NPIP | 18142919 | 11.3939 | 11.3508 | 0.0115  |
| CHB | NPIP | 18147919 | 16.3703 | 14.5697 | 0.3791  |
| CHB | NPIP | 18152919 | 18.9935 | 16.2638 | 0.5175  |
| CHB | NPIP | 18157919 | 12.3678 | 14.2309 | -0.4012 |
| CHB | NPIP | 18162919 | 6.7542  | 10.5037 | -1.075  |
| CHB | NPIP | 18167919 | 10.9328 | 8.979   | 0.6481  |
| CHB | NPIP | 18172919 | 13.0788 | 9.3178  | 1.2055  |
| CHB | NPIP | 18177919 | 9.5863  | 8.8096  | 0.2622  |
| CHB | NPIP | 18182919 | 8.7299  | 9.9955  | -0.38   |
| CHB | NPIP | 18187919 | 5.0845  | 6.4378  | -0.6085 |
| CHB | NPIP | 18192919 | 4.2353  | 3.2189  | 0.8356  |
| CHB | NPIP | 18197919 | 5.2564  | 3.5577  | 1.2838  |
| CHB | NPIP | 18202919 | 2.8359  | 3.2189  | -0.3149 |
| CHB | NPIP | 18207919 | 3.5167  | 5.2519  | -0.9358 |
| CHB | NPIP | 18212919 | 5.0946  | 7.6237  | -0.9753 |
| CHB | NPIP | 18217919 | 3.2553  | 4.5742  | -0.8031 |
| CHB | NPIP | 18222919 | 3.754   | 2.8801  | 0.7879  |
| CHB | NPIP | 18227919 | 10.2142 | 6.2684  | 1.8173  |
| CHB | NPIP | 18232919 | 16.4397 | 9.6567  | 2.1033  |
| CHB | NPIP | 18237919 | 14.4894 | 8.8096  | 1.9177  |
| CHB | NPIP | 18242919 | 9.9528  | 7.6237  | 0.8982  |
| CHB | NPIP | 18247919 | 10.7247 | 12.0285 | -0.3291 |
| CHB | NPIP | 18252919 | 11.9241 | 15.925  | -0.7739 |
| CHB | NPIP | 18257919 | 10.0007 | 13.3838 | -0.7721 |
| CHB | NPIP | 18262919 | 12.0981 | 13.3838 | -0.2934 |
| CHB | NPIP | 18267919 | 10.0768 | 10.6731 | -0.1684 |
| CHB | NPIP | 18272919 | 4.5136  | 4.2354  | 0.1811  |
| CHB | NPIP | 18277919 | 4.2355  | 3.2189  | 0.8358  |
| CHB | NPIP | 18282919 | 7.6886  | 4.7436  | 1.7372  |

## 2\_TajimasD\_data

|     |      |          |         |        |         |
|-----|------|----------|---------|--------|---------|
| CHB | NPIP | 18287919 | 11.6947 | 7.1154 | 1.8806  |
| CHB | NPIP | 18292919 | 11.0133 | 8.4708 | 0.8901  |
| CHB | NPIP | 18297919 | 7.9035  | 7.4543 | 0.1768  |
| CHB | NPIP | 18302919 | 6.9674  | 6.2684 | 0.3219  |
| CHB | NPIP | 18307919 | 8.6377  | 8.8096 | -0.058  |
| CHB | NPIP | 18312919 | 9.5743  | 9.9955 | -0.1265 |
| CHB | NPIP | 18317919 | 6.5448  | 7.1154 | -0.2343 |
| CHB | NPIP | 18322919 | 7.2835  | 6.7766 | 0.2176  |
| CHB | NPIP | 18327919 | 8.3781  | 8.1319 | 0.0895  |
| CHB | NPIP | 18332919 | 4.4186  | 7.4543 | -1.1949 |
| CHB | NPIP | 18337919 | 5.8348  | 8.4708 | -0.9228 |
| CHB | NPIP | 18342919 | 4.5875  | 6.0989 | -0.7134 |
| CHB | NPIP | 18347919 | 3.8049  | 3.2189 | 0.4818  |
| CHB | NPIP | 18352919 | 7.8037  | 5.4213 | 1.2493  |
| CHB | NPIP | 18357919 | 5.514   | 5.2519 | 0.1414  |
| CHB | NPIP | 18362919 | 2.2705  | 3.3883 | -0.8803 |
| CHB | NPIP | 18367919 | 2.4713  | 2.8801 | -0.3686 |
| CHB | NPIP | 18372919 | 1.9709  | 1.6942 | 0.3797  |
| CHB | NPIP | 18377919 | 1.1848  | 1.5247 | -0.505  |
| CHB | NPIP | 18382919 | 0.6311  | 2.7106 | -1.9704 |
| CHB | NPIP | 18387919 | 0.4238  | 2.3718 | -2.0563 |
| CHB | NPIP | 18392919 | 0.0581  | 0.8471 | -1.7792 |
| CHB | NPIP | 18397919 | 0.0672  | 0.5082 | -1.3844 |
| CHB | NPIP | 18402919 | 0.4624  | 1.5247 | -1.5782 |
| CHB | NPIP | 18407919 | 0.7599  | 2.5412 | -1.7788 |
| CHB | NPIP | 18412919 | 0.355   | 1.3553 | -1.6212 |
| CHB | NPIP | 18417919 | 0.0773  | 1.0165 | -1.8691 |
| CHB | NPIP | 18422919 | 0.0676  | 0.8471 | -1.7578 |
| CHB | NPIP | 18427919 | 0.5075  | 1.0165 | -1.0129 |
| CHB | NPIP | 18432919 | 0.8544  | 2.5412 | -1.6844 |
| CHB | NPIP | 18437919 | 0.4569  | 1.6942 | -1.698  |
| CHB | NPIP | 18442919 | 0.11    | 0.1694 | -0.353  |
| CHB | NPIP | 18447919 | 0.1936  | 0.6777 | -1.2656 |
| CHB | NPIP | 18452919 | 0.1936  | 0.6777 | -1.2656 |
| CHB | NPIP | 18457919 | 0.0383  | 0.3388 | -1.2054 |
| CHB | NPIP | 18462919 | 0.0769  | 0.8471 | -1.7368 |
| CHB | NPIP | 18467919 | 0.2461  | 1.3553 | -1.7977 |
| CHB | NPIP | 18472919 | 0.5254  | 2.2024 | -1.8778 |
| CHB | NPIP | 18477919 | 0.434   | 2.8801 | -2.2054 |
| CHB | NPIP | 18482919 | 0.712   | 2.5412 | -1.8266 |
| CHB | NPIP | 18487919 | 0.7318  | 1.1859 | -0.8106 |
| CHB | NPIP | 18492919 | 0.1456  | 0.3388 | -0.775  |
| CHB | NPIP | 18497919 | 0.4967  | 0.3388 | 0.6334  |
| CHB | NPIP | 18502919 | 0.5161  | 0.6777 | -0.4225 |
| CHB | NPIP | 18507919 | 0.0291  | 0.5082 | -1.504  |
| CHB | NPIP | 18512919 | 0.0383  | 0.1694 | -0.779  |
| CHB | NPIP | 18517919 | 0.0383  | 0.1694 | -0.779  |
| CHB | NPIP | 18522919 | 0       | 0      | 0       |
| CHB | NPIP | 18527919 | 0.2941  | 0.6777 | -1.0028 |

## 2\_TajimasD\_data

|     |      |          |         |         |         |
|-----|------|----------|---------|---------|---------|
| CHB | NPIP | 18532919 | 0.6634  | 1.3553  | -1.1214 |
| CHB | NPIP | 18537919 | 1.2138  | 2.7106  | -1.4183 |
| CHB | NPIP | 18542919 | 1.4177  | 3.7271  | -1.6777 |
| CHB | NPIP | 18547919 | 0.7548  | 3.0495  | -1.9734 |
| CHB | NPIP | 18552919 | 1.2172  | 2.7106  | -1.4151 |
| CHB | NPIP | 18557919 | 1.4474  | 2.8801  | -1.2917 |
| CHB | NPIP | 18562919 | 0.688   | 2.8801  | -1.9764 |
| CHB | NPIP | 18567919 | 1.0925  | 3.5577  | -1.8631 |
| CHB | NPIP | 18572919 | 2.2311  | 3.8965  | -1.1648 |
| CHB | NPIP | 18577919 | 2.9989  | 4.4048  | -0.8847 |
| CHB | NPIP | 18582919 | 2.237   | 5.5907  | -1.7111 |
| CHB | NPIP | 18587919 | 1.4969  | 4.2354  | -1.7828 |
| CHB | NPIP | 18592919 | 1.7276  | 3.8965  | -1.517  |
| CHB | NPIP | 18597919 | 2.0923  | 5.4213  | -1.7456 |
| CHB | NPIP | 18602919 | 2.6343  | 6.6072  | -1.7449 |
| CHB | NPIP | 18607919 | 2.6261  | 5.2519  | -1.4162 |
| CHB | NPIP | 18612919 | 2.2867  | 3.8965  | -1.1259 |
| CHB | NPIP | 18617919 | 1.2597  | 3.7271  | -1.7925 |
| CHB | NPIP | 18622919 | 0.3368  | 2.8801  | -2.2931 |
| CHB | NPIP | 18627919 | 0.8452  | 3.8965  | -2.1341 |
| CHB | NPIP | 18632919 | 1.4516  | 3.2189  | -1.453  |
| CHB | NPIP | 18637919 | 0.881   | 1.1859  | -0.5442 |
| CHB | NPIP | 18642919 | 0.1502  | 0.8471  | -1.5715 |
| CHB | NPIP | 18647919 | 3.0746  | 2.3718  | 0.7419  |
| CHB | NPIP | 18652919 | 3.1841  | 2.2024  | 1.0992  |
| CHB | NPIP | 18657919 | 0.1483  | 0.3388  | -0.7642 |
| CHB | NPIP | 18662919 | 2.9587  | 2.2024  | 0.8469  |
| CHB | NPIP | 18667919 | 4.6777  | 3.7271  | 0.6906  |
| CHB | NPIP | 18672919 | 3.1125  | 3.0495  | 0.0542  |
| CHB | NPIP | 18677919 | 2.0192  | 3.2189  | -0.9863 |
| CHB | NPIP | 18682919 | 1.1713  | 3.0495  | -1.6153 |
| CHB | NPIP | 18687919 | 1.1175  | 2.2024  | -1.2148 |
| CHB | NPIP | 18692919 | 0.5816  | 1.0165  | -0.8655 |
| CHB | NPIP | 18697919 | 0.4976  | 0.5082  | -0.0333 |
| CHB | NPIP | 18702919 | 2.6204  | 2.7106  | -0.0855 |
| CHB | NPIP | 18707919 | 3.1751  | 4.066   | -0.6008 |
| CHB | NPIP | 18712919 | 2.5561  | 3.8965  | -0.9375 |
| CHB | NPIP | 18717919 | 2.1117  | 3.2189  | -0.9103 |
| CHB | NPIP | 18722919 | 5.6246  | 3.7271  | 1.3785  |
| CHB | NPIP | 18727919 | 9.8999  | 7.1154  | 1.1435  |
| CHB | NPIP | 18732919 | 9.442   | 8.8096  | 0.2135  |
| CHB | NPIP | 18737919 | 7.9054  | 7.2848  | 0.2495  |
| CHB | NPIP | 18742919 | 8.6784  | 7.7931  | 0.3346  |
| CHB | NPIP | 18747919 | 9.0995  | 7.4543  | 0.6476  |
| CHB | NPIP | 18752919 | 9.4603  | 7.4543  | 0.7896  |
| CHB | NPIP | 18757919 | 15.0796 | 10.3343 | 1.3813  |
| CHB | NPIP | 18762919 | 18.8018 | 12.5367 | 1.5211  |
| CHB | NPIP | 18767919 | 13.5403 | 13.3838 | 0.0357  |
| CHB | NPIP | 18772919 | 6.3459  | 9.9955  | -1.0959 |



## 2\_TajimasD\_data

|     |      |          |         |         |         |
|-----|------|----------|---------|---------|---------|
| CHB | NPIP | 18777919 | 5.4104  | 7.9625  | -0.9457 |
| CHB | NPIP | 18782919 | 6.9431  | 9.3178  | -0.7612 |
| CHB | NPIP | 18787919 | 7.0124  | 9.9955  | -0.8958 |
| CHB | NPIP | 18792919 | 4.3331  | 7.7931  | -1.3077 |
| CHB | NPIP | 18797919 | 2.1848  | 6.7766  | -1.9711 |
| CHB | NPIP | 18802919 | 3.6478  | 8.3013  | -1.6597 |
| CHB | NPIP | 18807919 | 3.3531  | 7.6237  | -1.6469 |
| CHB | NPIP | 18812919 | 2.3025  | 6.4378  | -1.8594 |
| CHB | NPIP | 18817919 | 2.6467  | 6.0989  | -1.6296 |
| CHB | NPIP | 18822919 | 4.89    | 7.7931  | -1.0972 |
| CHB | NPIP | 18827919 | 6.9294  | 8.979   | -0.6799 |
| YRI | NPIP | 17822919 | 13.4586 | 16.6382 | -0.5878 |
| YRI | NPIP | 17827919 | 20.4403 | 24.0329 | -0.4661 |
| YRI | NPIP | 17832919 | 20.2887 | 25.2093 | -0.6094 |
| YRI | NPIP | 17837919 | 15.6481 | 21.512  | -0.8468 |
| YRI | NPIP | 17842919 | 16.5868 | 19.6633 | -0.4845 |
| YRI | NPIP | 17847919 | 22.7857 | 20.6717 | 0.3173  |
| YRI | NPIP | 17852919 | 21.1648 | 17.6465 | 0.6148  |
| YRI | NPIP | 17857919 | 18.267  | 16.134  | 0.4061  |
| YRI | NPIP | 17862919 | 16.9599 | 17.9827 | -0.1755 |
| YRI | NPIP | 17867919 | 13.4172 | 15.9659 | -0.4901 |
| YRI | NPIP | 17872919 | 13.8258 | 14.2853 | -0.0982 |
| YRI | NPIP | 17877919 | 13.8977 | 14.7895 | -0.1845 |
| YRI | NPIP | 17882919 | 12.5813 | 15.2937 | -0.5435 |
| YRI | NPIP | 17887919 | 13.6057 | 16.6382 | -0.5606 |
| YRI | NPIP | 17892919 | 20.1719 | 21.0078 | -0.1235 |
| YRI | NPIP | 17897919 | 22.4708 | 22.3523 | 0.0165  |
| YRI | NPIP | 17902919 | 17.8966 | 18.823  | -0.1522 |
| YRI | NPIP | 17907919 | 16.4904 | 16.302  | 0.0355  |
| YRI | NPIP | 17912919 | 17.9518 | 16.6382 | 0.2429  |
| YRI | NPIP | 17917919 | 17.6694 | 17.3104 | 0.0639  |
| YRI | NPIP | 17922919 | 19.4623 | 19.9994 | -0.0832 |
| YRI | NPIP | 17927919 | 23.8249 | 21.1758 | 0.3884  |
| YRI | NPIP | 17932919 | 33.0196 | 26.0496 | 0.8362  |
| YRI | NPIP | 17937919 | 34.6355 | 27.5622 | 0.8033  |
| YRI | NPIP | 17942919 | 25.2082 | 18.823  | 1.0487  |
| YRI | NPIP | 17947919 | 23.3019 | 19.6633 | 0.573   |
| YRI | NPIP | 17952919 | 20.6531 | 21.8481 | -0.17   |
| YRI | NPIP | 17957919 | 14.8938 | 18.1507 | -0.554  |
| YRI | NPIP | 17962919 | 14.6063 | 17.4785 | -0.5065 |
| YRI | NPIP | 17967919 | 10.9323 | 15.1256 | -0.8491 |
| YRI | NPIP | 17972919 | 9.1988  | 13.445  | -0.9616 |
| YRI | NPIP | 17977919 | 13.7298 | 14.9575 | -0.2513 |
| YRI | NPIP | 17982919 | 19.0598 | 17.1423 | 0.3445  |
| YRI | NPIP | 17987919 | 23.9638 | 20.5036 | 0.5234  |
| YRI | NPIP | 17992919 | 25.6768 | 20.6717 | 0.7511  |
| YRI | NPIP | 17997919 | 23.3717 | 19.8313 | 0.553   |
| YRI | NPIP | 18002919 | 21.6543 | 20.3355 | 0.2011  |
| YRI | NPIP | 18007919 | 17.3217 | 14.4534 | 0.6065  |

## 2\_TajimasD\_data

|     |      |          |         |         |         |
|-----|------|----------|---------|---------|---------|
| YRI | NPIP | 18012919 | 10.7719 | 9.2434  | 0.4919  |
| YRI | NPIP | 18017919 | 11.0061 | 11.5963 | -0.1537 |
| YRI | NPIP | 18022919 | 16.4093 | 15.1256 | 0.2599  |
| YRI | NPIP | 18027919 | 12.7728 | 14.4534 | -0.3554 |
| YRI | NPIP | 18032919 | 7.2497  | 12.9408 | -1.3364 |
| YRI | NPIP | 18037919 | 7.5472  | 13.613  | -1.3576 |
| YRI | NPIP | 18042919 | 9.0425  | 13.7811 | -1.0483 |
| YRI | NPIP | 18047919 | 15.0161 | 15.7978 | -0.1519 |
| YRI | NPIP | 18052919 | 23.5532 | 21.1758 | 0.3486  |
| YRI | NPIP | 18057919 | 19.5024 | 19.6633 | -0.0253 |
| YRI | NPIP | 18062919 | 10.7183 | 14.6214 | -0.8163 |
| YRI | NPIP | 18067919 | 11.9901 | 13.9492 | -0.4285 |
| YRI | NPIP | 18072919 | 11.2198 | 14.7895 | -0.7385 |
| YRI | NPIP | 18077919 | 7.0903  | 14.2853 | -1.5384 |
| YRI | NPIP | 18082919 | 5.8223  | 11.9324 | -1.5489 |
| YRI | NPIP | 18087919 | 7.8298  | 13.1089 | -1.2246 |
| YRI | NPIP | 18092919 | 9.5536  | 15.1256 | -1.1283 |
| YRI | NPIP | 18097919 | 11.3863 | 14.4534 | -0.6485 |
| YRI | NPIP | 18102919 | 11.661  | 12.9408 | -0.3005 |
| YRI | NPIP | 18107919 | 13.5493 | 13.7811 | -0.0513 |
| YRI | NPIP | 18112919 | 13.7034 | 13.2769 | 0.0977  |
| YRI | NPIP | 18117919 | 11.1338 | 14.6214 | -0.7294 |
| YRI | NPIP | 18122919 | 10.7901 | 15.7978 | -0.9728 |
| YRI | NPIP | 18127919 | 12.6134 | 16.4701 | -0.72   |
| YRI | NPIP | 18132919 | 14.5269 | 18.6549 | -0.6839 |
| YRI | NPIP | 18137919 | 12.7034 | 17.3104 | -0.82   |
| YRI | NPIP | 18142919 | 11.0686 | 15.7978 | -0.9187 |
| YRI | NPIP | 18147919 | 16.7617 | 17.3104 | -0.0977 |
| YRI | NPIP | 18152919 | 20.9556 | 20.1675 | 0.1211  |
| YRI | NPIP | 18157919 | 17.0277 | 19.6633 | -0.4151 |
| YRI | NPIP | 18162919 | 12.0805 | 17.4785 | -0.952  |
| YRI | NPIP | 18167919 | 12.7921 | 14.4534 | -0.3513 |
| YRI | NPIP | 18172919 | 15.1135 | 14.2853 | 0.1771  |
| YRI | NPIP | 18177919 | 14.4875 | 16.4701 | -0.3701 |
| YRI | NPIP | 18182919 | 12.1883 | 15.9659 | -0.7265 |
| YRI | NPIP | 18187919 | 6.5722  | 10.0837 | -1.0423 |
| YRI | NPIP | 18192919 | 3.7735  | 5.7141  | -0.9677 |
| YRI | NPIP | 18197919 | 4.2216  | 7.8989  | -1.368  |
| YRI | NPIP | 18202919 | 2.7894  | 6.7225  | -1.6948 |
| YRI | NPIP | 18207919 | 4.6193  | 8.5712  | -1.3638 |
| YRI | NPIP | 18212919 | 6.3593  | 10.5879 | -1.1992 |
| YRI | NPIP | 18217919 | 3.1443  | 6.0502  | -1.3768 |
| YRI | NPIP | 18222919 | 3.1594  | 4.8738  | -0.9841 |
| YRI | NPIP | 18227919 | 6.5373  | 6.8906  | -0.1489 |
| YRI | NPIP | 18232919 | 13.9277 | 12.1005 | 0.4571  |
| YRI | NPIP | 18237919 | 15.198  | 13.445  | 0.397   |
| YRI | NPIP | 18242919 | 11.6019 | 13.1089 | -0.3496 |
| YRI | NPIP | 18247919 | 13.2609 | 16.134  | -0.547  |
| YRI | NPIP | 18252919 | 18.1008 | 18.6549 | -0.0918 |

## 2\_TajimasD\_data

|     |      |          |         |         |         |
|-----|------|----------|---------|---------|---------|
| YRI | NPIP | 18257919 | 15.0105 | 16.6382 | -0.3009 |
| YRI | NPIP | 18262919 | 11.6834 | 15.6298 | -0.7745 |
| YRI | NPIP | 18267919 | 10.8053 | 15.6298 | -0.9468 |
| YRI | NPIP | 18272919 | 5.666   | 10.0837 | -1.3112 |
| YRI | NPIP | 18277919 | 4.4406  | 5.378   | -0.4933 |
| YRI | NPIP | 18282919 | 7.3786  | 6.2183  | 0.5364  |
| YRI | NPIP | 18287919 | 12.8236 | 12.6047 | 0.0527  |
| YRI | NPIP | 18292919 | 13.9276 | 16.8062 | -0.5271 |
| YRI | NPIP | 18297919 | 10.8274 | 15.2937 | -0.8949 |
| YRI | NPIP | 18302919 | 9.8037  | 12.7727 | -0.7058 |
| YRI | NPIP | 18307919 | 10.692  | 13.7811 | -0.6834 |
| YRI | NPIP | 18312919 | 12.0834 | 15.4617 | -0.6699 |
| YRI | NPIP | 18317919 | 9.3871  | 12.2685 | -0.7116 |
| YRI | NPIP | 18322919 | 9.4361  | 10.0837 | -0.1922 |
| YRI | NPIP | 18327919 | 10.7231 | 9.5795  | 0.356   |
| YRI | NPIP | 18332919 | 10.3715 | 9.2434  | 0.3631  |
| YRI | NPIP | 18337919 | 14.1254 | 12.4366 | 0.4117  |
| YRI | NPIP | 18342919 | 10.1216 | 9.5795  | 0.1688  |
| YRI | NPIP | 18347919 | 6.7369  | 5.7141  | 0.51    |
| YRI | NPIP | 18352919 | 8.7225  | 6.3864  | 1.0544  |
| YRI | NPIP | 18357919 | 6.518   | 6.5544  | -0.016  |
| YRI | NPIP | 18362919 | 4.1892  | 6.2183  | -0.938  |
| YRI | NPIP | 18367919 | 3.6629  | 4.5377  | -0.5345 |
| YRI | NPIP | 18372919 | 2.7861  | 3.6974  | -0.6642 |
| YRI | NPIP | 18377919 | 1.7456  | 4.2016  | -1.6043 |
| YRI | NPIP | 18382919 | 1.101   | 4.0335  | -1.9842 |
| YRI | NPIP | 18387919 | 0.8209  | 2.3529  | -1.6217 |
| YRI | NPIP | 18392919 | 0.1003  | 0.8403  | -1.6714 |
| YRI | NPIP | 18397919 | 0.1414  | 0.8403  | -1.5786 |
| YRI | NPIP | 18402919 | 0.4844  | 1.6806  | -1.6456 |
| YRI | NPIP | 18407919 | 0.5625  | 2.3529  | -1.8952 |
| YRI | NPIP | 18412919 | 0.1917  | 1.0084  | -1.6282 |
| YRI | NPIP | 18417919 | 0.1087  | 0.6722  | -1.4752 |
| YRI | NPIP | 18422919 | 0.1087  | 0.6722  | -1.4752 |
| YRI | NPIP | 18427919 | 0.6779  | 1.1764  | -0.8916 |
| YRI | NPIP | 18432919 | 1.4803  | 2.689   | -1.1487 |
| YRI | NPIP | 18437919 | 1.2644  | 2.1848  | -1.0334 |
| YRI | NPIP | 18442919 | 0.462   | 0.6722  | -0.5503 |
| YRI | NPIP | 18447919 | 0.0369  | 0.5042  | -1.4686 |
| YRI | NPIP | 18452919 | 0.0369  | 0.5042  | -1.4686 |
| YRI | NPIP | 18457919 | 0.0093  | 0.1681  | -0.944  |
| YRI | NPIP | 18462919 | 0.289   | 0.6722  | -1.0032 |
| YRI | NPIP | 18467919 | 0.5482  | 2.0167  | -1.7558 |
| YRI | NPIP | 18472919 | 1.0173  | 3.1932  | -1.7945 |
| YRI | NPIP | 18477919 | 0.958   | 3.3612  | -1.8986 |
| YRI | NPIP | 18482919 | 0.7476  | 2.8571  | -1.9077 |
| YRI | NPIP | 18487919 | 0.6989  | 1.5126  | -1.2116 |
| YRI | NPIP | 18492919 | 0.188   | 0.6722  | -1.2676 |
| YRI | NPIP | 18497919 | 0.5301  | 0.5042  | 0.0814  |

## 2\_TajimasD\_data

|     |      |          |         |         |         |
|-----|------|----------|---------|---------|---------|
| YRI | NPIP | 18502919 | 0.6121  | 0.6722  | -0.1573 |
| YRI | NPIP | 18507919 | 0.1096  | 0.5042  | -1.2401 |
| YRI | NPIP | 18512919 | 0.2481  | 0.1681  | 0.4756  |
| YRI | NPIP | 18517919 | 0.3287  | 0.5042  | -0.5515 |
| YRI | NPIP | 18522919 | 0.0806  | 0.3361  | -1.0257 |
| YRI | NPIP | 18527919 | 0.3884  | 0.6722  | -0.743  |
| YRI | NPIP | 18532919 | 0.4803  | 1.5126  | -1.5371 |
| YRI | NPIP | 18537919 | 1.5616  | 5.5461  | -2.0404 |
| YRI | NPIP | 18542919 | 2.4778  | 9.7476  | -2.227  |
| YRI | NPIP | 18547919 | 1.7743  | 8.235   | -2.3133 |
| YRI | NPIP | 18552919 | 2.3692  | 5.378   | -1.5835 |
| YRI | NPIP | 18557919 | 2.4347  | 5.0419  | -1.4527 |
| YRI | NPIP | 18562919 | 1.5091  | 6.7225  | -2.2465 |
| YRI | NPIP | 18567919 | 2.5151  | 8.7392  | -2.1098 |
| YRI | NPIP | 18572919 | 3.9186  | 8.9073  | -1.6615 |
| YRI | NPIP | 18577919 | 4.1207  | 8.7392  | -1.5655 |
| YRI | NPIP | 18582919 | 2.8655  | 8.7392  | -1.991  |
| YRI | NPIP | 18587919 | 1.669   | 6.7225  | -2.1776 |
| YRI | NPIP | 18592919 | 1.9698  | 7.2267  | -2.1213 |
| YRI | NPIP | 18597919 | 3.5543  | 10.4199 | -1.9764 |
| YRI | NPIP | 18602919 | 4.0252  | 10.5879 | -1.8612 |
| YRI | NPIP | 18607919 | 2.8221  | 7.7309  | -1.8625 |
| YRI | NPIP | 18612919 | 2.5704  | 6.2183  | -1.6864 |
| YRI | NPIP | 18617919 | 2.8673  | 8.235   | -1.9219 |
| YRI | NPIP | 18622919 | 2.6797  | 9.4115  | -2.1306 |
| YRI | NPIP | 18627919 | 2.4361  | 8.9073  | -2.1553 |
| YRI | NPIP | 18632919 | 2.0116  | 6.5544  | -2.0028 |
| YRI | NPIP | 18637919 | 1.1165  | 2.689   | -1.4944 |
| YRI | NPIP | 18642919 | 0.7252  | 2.5209  | -1.7983 |
| YRI | NPIP | 18647919 | 1.2001  | 3.8654  | -1.8704 |
| YRI | NPIP | 18652919 | 1.4064  | 3.6974  | -1.6698 |
| YRI | NPIP | 18657919 | 0.604   | 2.3529  | -1.8513 |
| YRI | NPIP | 18662919 | 1.7601  | 3.8654  | -1.4774 |
| YRI | NPIP | 18667919 | 2.7058  | 5.8822  | -1.5434 |
| YRI | NPIP | 18672919 | 2.7311  | 5.8822  | -1.5312 |
| YRI | NPIP | 18677919 | 2.9238  | 6.7225  | -1.6369 |
| YRI | NPIP | 18682919 | 2.274   | 5.0419  | -1.5422 |
| YRI | NPIP | 18687919 | 1.9134  | 3.1932  | -1.0555 |
| YRI | NPIP | 18692919 | 1.1806  | 2.3529  | -1.2409 |
| YRI | NPIP | 18697919 | 1.5909  | 1.6806  | -0.1234 |
| YRI | NPIP | 18702919 | 5.5404  | 4.8738  | 0.3826  |
| YRI | NPIP | 18707919 | 6.7812  | 7.2267  | -0.1798 |
| YRI | NPIP | 18712919 | 5.5675  | 8.7392  | -1.0751 |
| YRI | NPIP | 18717919 | 4.6659  | 8.067   | -1.2411 |
| YRI | NPIP | 18722919 | 9.0173  | 9.2434  | -0.0728 |
| YRI | NPIP | 18727919 | 17.4855 | 12.4366 | 1.2309  |
| YRI | NPIP | 18732919 | 19.3235 | 14.2853 | 1.0772  |
| YRI | NPIP | 18737919 | 14.0124 | 12.9408 | 0.2516  |
| YRI | NPIP | 18742919 | 11.4522 | 13.9492 | -0.5461 |

## 2\_TajimasD\_data

|     |      |          |         |         |         |
|-----|------|----------|---------|---------|---------|
| YRI | NPIP | 18747919 | 11.473  | 16.302  | -0.9104 |
| YRI | NPIP | 18752919 | 12.8226 | 12.7727 | 0.0119  |
| YRI | NPIP | 18757919 | 19.2451 | 13.1089 | 1.4234  |
| YRI | NPIP | 18762919 | 24.0403 | 16.302  | 1.4588  |
| YRI | NPIP | 18767919 | 21.3403 | 18.1507 | 0.5425  |
| YRI | NPIP | 18772919 | 14.0942 | 15.6298 | -0.3014 |
| YRI | NPIP | 18777919 | 11.9129 | 14.7895 | -0.5951 |
| YRI | NPIP | 18782919 | 12.2307 | 16.9743 | -0.8604 |
| YRI | NPIP | 18787919 | 11.732  | 16.8062 | -0.9291 |
| YRI | NPIP | 18792919 | 8.7573  | 13.2769 | -1.0358 |
| YRI | NPIP | 18797919 | 6.0986  | 12.4366 | -1.5452 |
| YRI | NPIP | 18802919 | 7.4044  | 12.6047 | -1.2519 |
| YRI | NPIP | 18807919 | 7.102   | 9.7476  | -0.8104 |
| YRI | NPIP | 18812919 | 6.1662  | 8.4031  | -0.7862 |
| YRI | NPIP | 18817919 | 5.9033  | 8.9073  | -1.0005 |
| YRI | NPIP | 18822919 | 9.4744  | 12.9408 | -0.814  |
| YRI | NPIP | 18827919 | 11.6443 | 14.4534 | -0.594  |
| CEU | NPIP | 21339568 | 1.7675  | 5.1169  | -1.854  |
| CEU | NPIP | 21344568 | 1.5912  | 4.6052  | -1.8299 |
| CEU | NPIP | 21349568 | 2.4739  | 6.3108  | -1.7616 |
| CEU | NPIP | 21354568 | 2.5982  | 6.3108  | -1.7045 |
| CEU | NPIP | 21359568 | 2.0866  | 5.458   | -1.7625 |
| CEU | NPIP | 21364568 | 3.0868  | 6.9931  | -1.6345 |
| CEU | NPIP | 21369568 | 2.6452  | 6.1402  | -1.6446 |
| CEU | NPIP | 21374568 | 1.9112  | 3.7524  | -1.3339 |
| CEU | NPIP | 21379568 | 3.8165  | 5.2874  | -0.7909 |
| CEU | NPIP | 21384568 | 4.2618  | 7.5047  | -1.2724 |
| CEU | NPIP | 21389568 | 3.9518  | 6.3108  | -1.0831 |
| CEU | NPIP | 21394568 | 2.8093  | 4.0935  | -0.8635 |
| CEU | NPIP | 21399568 | 1.4494  | 2.8996  | -1.3042 |
| CEU | NPIP | 21404568 | 1.3867  | 2.5584  | -1.1672 |
| CEU | NPIP | 21409568 | 1.1315  | 2.2173  | -1.213  |
| CEU | NPIP | 21414568 | 0.7361  | 1.3645  | -1.0166 |
| CEU | NPIP | 21419568 | 0.2632  | 0.5117  | -0.7794 |
| CEU | NPIP | 21424568 | 0.02    | 0.1706  | -0.8946 |
| CEU | NPIP | 21429568 | 0.2552  | 0.5117  | -0.8045 |
| CEU | NPIP | 21434568 | 0.2352  | 0.3411  | -0.4245 |
| CEU | NPIP | 21439568 | 0       | 0       | 0       |
| CEU | NPIP | 21444568 | 0       | 0       | 0       |
| CEU | NPIP | 21449568 | 0       | 0       | 0       |
| CEU | NPIP | 21454568 | 0       | 0       | 0       |
| CEU | NPIP | 21459568 | 0.0301  | 0.1706  | -0.8346 |
| CEU | NPIP | 21464568 | 0.109   | 0.5117  | -1.263  |
| CEU | NPIP | 21469568 | 0.3987  | 1.0234  | -1.2413 |
| CEU | NPIP | 21474568 | 0.6392  | 0.8528  | -0.481  |
| CEU | NPIP | 21479568 | 0.3397  | 0.5117  | -0.5394 |
| CEU | NPIP | 21484568 | 0.3076  | 2.0467  | -2.0693 |
| CEU | NPIP | 21489568 | 0.5199  | 2.5584  | -2.0307 |
| CEU | NPIP | 21494568 | 0.4661  | 1.7056  | -1.6976 |

## 2\_TajimasD\_data

|     |      |          |         |         |         |
|-----|------|----------|---------|---------|---------|
| CEU | NPIP | 21499568 | 0.2437  | 1.0234  | -1.5493 |
| CEU | NPIP | 21504568 | 0.0402  | 0.5117  | -1.4787 |
| CEU | NPIP | 21509568 | 0.7743  | 3.0701  | -1.9693 |
| CEU | NPIP | 21514568 | 2.1791  | 5.7991  | -1.793  |
| CEU | NPIP | 21519568 | 3.8576  | 8.5281  | -1.6296 |
| CEU | NPIP | 21524568 | 4.0804  | 10.7454 | -1.876  |
| CEU | NPIP | 21529568 | 2.2249  | 9.2104  | -2.2699 |
| CEU | NPIP | 21534568 | 1.7407  | 8.3576  | -2.3521 |
| CEU | NPIP | 21539568 | 3.3101  | 8.0164  | -1.7383 |
| CEU | NPIP | 21544568 | 3.1337  | 7.5047  | -1.715  |
| CEU | NPIP | 21549568 | 2.7083  | 8.3576  | -2.0082 |
| CEU | NPIP | 21554568 | 2.1457  | 7.3342  | -2.0789 |
| CEU | NPIP | 21559568 | 1.4989  | 5.6286  | -2.1006 |
| CEU | NPIP | 21564568 | 2.167   | 6.3108  | -1.9025 |
| CEU | NPIP | 21569568 | 3.7377  | 8.0164  | -1.5804 |
| CEU | NPIP | 21574568 | 4.3126  | 8.3576  | -1.4379 |
| CEU | NPIP | 21579568 | 2.9037  | 7.6753  | -1.8341 |
| CEU | NPIP | 21584568 | 3.1123  | 7.8459  | -1.7832 |
| CEU | NPIP | 21589568 | 2.4593  | 6.9931  | -1.897  |
| CEU | NPIP | 21594568 | 2.6131  | 5.7991  | -1.578  |
| CEU | NPIP | 21599568 | 2.5733  | 5.1169  | -1.4079 |
| CEU | NPIP | 21604568 | 1.8561  | 4.4346  | -1.6178 |
| CEU | NPIP | 21609568 | 4.3092  | 5.2874  | -0.526  |
| CEU | NPIP | 21614568 | 3.3144  | 4.2641  | -0.6165 |
| CEU | NPIP | 21619568 | 2.3026  | 3.5818  | -0.9641 |
| CEU | NPIP | 21624568 | 3.9709  | 4.2641  | -0.1903 |
| CEU | NPIP | 21629568 | 3.4364  | 5.1169  | -0.9302 |
| CEU | NPIP | 21634568 | 2.5234  | 5.2874  | -1.4862 |
| CEU | NPIP | 21639568 | 3.1692  | 4.9463  | -1.0135 |
| CEU | NPIP | 21644568 | 3.5516  | 5.2874  | -0.9333 |
| CEU | NPIP | 21649568 | 2.6662  | 4.4346  | -1.1096 |
| CEU | NPIP | 21654568 | 2.4557  | 4.0935  | -1.1013 |
| CEU | NPIP | 21659568 | 2.0981  | 4.2641  | -1.406  |
| CEU | NPIP | 21664568 | 2.4084  | 4.7757  | -1.3923 |
| CEU | NPIP | 21669568 | 3.1618  | 4.7757  | -0.9492 |
| CEU | NPIP | 21674568 | 4.7514  | 5.6286  | -0.4462 |
| CEU | NPIP | 21679568 | 5.0418  | 5.9697  | -0.4478 |
| CEU | NPIP | 21684568 | 4.1989  | 5.6286  | -0.7272 |
| CEU | NPIP | 21689568 | 4.8561  | 6.4814  | -0.7285 |
| CEU | NPIP | 21694568 | 3.1655  | 5.458   | -1.1985 |
| CEU | NPIP | 21699568 | 1.0853  | 4.7757  | -2.1705 |
| CEU | NPIP | 21704568 | 2.9217  | 4.7757  | -1.0904 |
| CEU | NPIP | 21709568 | 6.1944  | 4.7757  | 0.8344  |
| CEU | NPIP | 21714568 | 5.8363  | 5.458   | 0.1978  |
| CEU | NPIP | 21719568 | 3.4162  | 5.9697  | -1.2324 |
| CEU | NPIP | 21724568 | 3.8874  | 5.9697  | -1.0049 |
| CEU | NPIP | 21729568 | 8.2783  | 7.6753  | 0.2318  |
| CEU | NPIP | 21734568 | 12.4589 | 9.5515  | 0.9134  |
| CEU | NPIP | 21739568 | 9.5743  | 7.3342  | 0.8975  |

## 2\_TajimasD\_data

|     |      |          |        |        |         |
|-----|------|----------|--------|--------|---------|
| CEU | NPIP | 21744568 | 6.7848 | 6.1402 | 0.3033  |
| CEU | NPIP | 21749568 | 5.7829 | 4.2641 | 0.9859  |
| CEU | NPIP | 21754568 | 1.8411 | 1.0234 | 1.6248  |
| CEU | NPIP | 21759568 | 0.7691 | 1.5351 | -1.1358 |
| CEU | NPIP | 21764568 | 2.3618 | 2.5584 | -0.1958 |
| CEU | NPIP | 21769568 | 4.4824 | 4.2641 | 0.1417  |
| CEU | NPIP | 21774568 | 4.8384 | 5.7991 | -0.4758 |
| CEU | NPIP | 21779568 | 3.2989 | 4.9463 | -0.9395 |
| CEU | NPIP | 21784568 | 2.2391 | 4.9463 | -1.5439 |
| CEU | NPIP | 21789568 | 1.429  | 3.7524 | -1.6833 |
| CEU | NPIP | 21794568 | 1.67   | 2.2173 | -0.6114 |
| CEU | NPIP | 21799568 | 1.4642 | 1.7056 | -0.3306 |
| CEU | NPIP | 21804568 | 2.3556 | 3.9229 | -1.0931 |
| CEU | NPIP | 21809568 | 2.8456 | 5.1169 | -1.2572 |
| CEU | NPIP | 21814568 | 2.5327 | 4.7757 | -1.3192 |
| CEU | NPIP | 21819568 | 3.6516 | 6.8225 | -1.3568 |
| CEU | NPIP | 21824568 | 3.3416 | 6.1402 | -1.3169 |
| CEU | NPIP | 21829568 | 2.9118 | 5.9697 | -1.4758 |
| CEU | NPIP | 21834568 | 2.0686 | 6.9931 | -2.0605 |
| CEU | NPIP | 21839568 | 2.1241 | 6.3108 | -1.9222 |
| CEU | NPIP | 21844568 | 2.1705 | 4.4346 | -1.4206 |
| CEU | NPIP | 21849568 | 0.7745 | 2.0467 | -1.5138 |
| CEU | NPIP | 21854568 | 0.417  | 0.6822 | -0.6925 |
| CEU | NPIP | 21859568 | 0.2744 | 0.3411 | -0.2674 |
| CEU | NPIP | 21864568 | 0.0101 | 0.1706 | -0.9534 |
| CEU | NPIP | 21869568 | 0.0301 | 0.1706 | -0.8346 |
| CEU | NPIP | 21874568 | 0.0301 | 0.1706 | -0.8346 |
| CEU | NPIP | 21879568 | 0      | 0      | 0       |
| CEU | NPIP | 21884568 | 0.0505 | 0.6822 | -1.6496 |
| CEU | NPIP | 21889568 | 0.0907 | 1.1939 | -1.9659 |
| CEU | NPIP | 21894568 | 0.6407 | 1.8762 | -1.573  |
| CEU | NPIP | 21899568 | 1.1793 | 2.8996 | -1.5471 |
| CEU | NPIP | 21904568 | 1.7058 | 3.0701 | -1.1703 |
| CEU | NPIP | 21909568 | 1.6961 | 2.5584 | -0.859  |
| CEU | NPIP | 21914568 | 0.5692 | 1.0234 | -0.9025 |
| CEU | NPIP | 21919568 | 0.4368 | 0.1706 | 1.5813  |
| CEU | NPIP | 21924568 | 0.5351 | 0.8528 | -0.7154 |
| CEU | NPIP | 21929568 | 0.3896 | 1.1939 | -1.4333 |
| CEU | NPIP | 21934568 | 0.6686 | 0.8528 | -0.4148 |
| CEU | NPIP | 21939568 | 0.5849 | 1.5351 | -1.409  |
| CEU | NPIP | 21944568 | 1.5718 | 4.4346 | -1.7962 |
| CEU | NPIP | 21949568 | 1.7986 | 4.4346 | -1.6539 |
| CEU | NPIP | 21954568 | 1.6436 | 3.4112 | -1.3883 |
| CEU | NPIP | 21959568 | 1.6802 | 4.6052 | -1.7759 |
| CEU | NPIP | 21964568 | 2.1296 | 4.4346 | -1.4462 |
| CEU | NPIP | 21969568 | 2.1006 | 4.7757 | -1.5733 |
| CEU | NPIP | 21974568 | 1.879  | 5.7991 | -1.9416 |
| CEU | NPIP | 21979568 | 2.4117 | 6.1402 | -1.7545 |
| CEU | NPIP | 21984568 | 1.1678 | 4.0935 | -1.9673 |

## 2\_TajimasD\_data

|     |      |          |        |         |         |
|-----|------|----------|--------|---------|---------|
| CEU | NPIP | 21989568 | 1.6118 | 3.4112  | -1.4133 |
| CEU | NPIP | 21994568 | 2.3257 | 4.2641  | -1.2583 |
| CEU | NPIP | 21999568 | 1.5083 | 3.7524  | -1.6258 |
| CEU | NPIP | 22004568 | 0.7518 | 3.5818  | -2.133  |
| CEU | NPIP | 22009568 | 2.054  | 4.6052  | -1.5489 |
| CEU | NPIP | 22014568 | 3.7155 | 6.1402  | -1.141  |
| CEU | NPIP | 22019568 | 3.4335 | 5.458   | -1.0584 |
| CEU | NPIP | 22024568 | 2.451  | 3.9229  | -1.0266 |
| CEU | NPIP | 22029568 | 1.4352 | 2.729   | -1.2229 |
| CEU | NPIP | 22034568 | 1.8916 | 3.7524  | -1.3481 |
| CEU | NPIP | 22039568 | 1.9382 | 4.9463  | -1.7155 |
| CEU | NPIP | 22044568 | 1.328  | 3.0701  | -1.4943 |
| CEU | NPIP | 22049568 | 1.4119 | 2.0467  | -0.7553 |
| CEU | NPIP | 22054568 | 2.0917 | 3.2407  | -0.9422 |
| CEU | NPIP | 22059568 | 3.2088 | 5.458   | -1.1758 |
| CEU | NPIP | 22064568 | 2.3387 | 5.2874  | -1.5855 |
| CEU | NPIP | 22069568 | 2.5088 | 4.7757  | -1.3333 |
| CEU | NPIP | 22074568 | 2.6469 | 4.7757  | -1.252  |
| CEU | NPIP | 22079568 | 2.831  | 4.6052  | -1.0772 |
| CEU | NPIP | 22084568 | 2.7658 | 4.6052  | -1.1168 |
| CEU | NPIP | 22089568 | 1.5502 | 3.9229  | -1.6549 |
| CEU | NPIP | 22094568 | 1.3902 | 3.4112  | -1.5873 |
| CEU | NPIP | 22099568 | 0.4591 | 2.3879  | -2.0312 |
| CEU | NPIP | 22104568 | 1.9017 | 4.4346  | -1.5892 |
| CEU | NPIP | 22109568 | 2.3239 | 5.2874  | -1.5935 |
| CEU | NPIP | 22114568 | 1.0072 | 3.4112  | -1.8881 |
| CEU | NPIP | 22119568 | 1.5601 | 4.0935  | -1.7035 |
| CEU | NPIP | 22124568 | 3.5584 | 5.9697  | -1.1637 |
| CEU | NPIP | 22129568 | 3.8547 | 6.6519  | -1.2247 |
| CEU | NPIP | 22134568 | 5.0942 | 7.5047  | -0.9458 |
| CEU | NPIP | 22139568 | 7.0903 | 7.6753  | -0.2249 |
| CEU | NPIP | 22144568 | 6.1156 | 6.8225  | -0.3025 |
| CEU | NPIP | 22149568 | 3.846  | 5.7991  | -0.9674 |
| CEU | NPIP | 22154568 | 3.1396 | 5.7991  | -1.3172 |
| CEU | NPIP | 22159568 | 2.8207 | 5.6286  | -1.4283 |
| CEU | NPIP | 22164568 | 1.6283 | 4.9463  | -1.8923 |
| CEU | NPIP | 22169568 | 2.9755 | 5.458   | -1.2978 |
| CEU | NPIP | 22174568 | 3.2107 | 5.7991  | -1.282  |
| CEU | NPIP | 22179568 | 2.6223 | 5.458   | -1.4824 |
| CEU | NPIP | 22184568 | 3.6656 | 5.2874  | -0.872  |
| CEU | NPIP | 22189568 | 4.0633 | 5.6286  | -0.7962 |
| CEU | NPIP | 22194568 | 4.9897 | 5.6286  | -0.325  |
| CEU | NPIP | 22199568 | 4.3966 | 4.9463  | -0.3135 |
| CEU | NPIP | 22204568 | 4.912  | 4.7757  | 0.0802  |
| CEU | NPIP | 22209568 | 5.8887 | 5.9697  | -0.0391 |
| CEU | NPIP | 22214568 | 3.4583 | 5.1169  | -0.9181 |
| CEU | NPIP | 22219568 | 4.6528 | 6.1402  | -0.6999 |
| CEU | NPIP | 22224568 | 7.4495 | 9.7221  | -0.7023 |
| CEU | NPIP | 22229568 | 8.1845 | 10.4043 | -0.644  |



## 2\_TajimasD\_data

|     |      |          |        |        |         |
|-----|------|----------|--------|--------|---------|
| CEU | NPIP | 22234568 | 7.4234 | 8.3576 | -0.3321 |
| CEU | NPIP | 22239568 | 6.6805 | 7.3342 | -0.2619 |
| CEU | NPIP | 22244568 | 6.6242 | 8.187  | -0.5662 |
| CEU | NPIP | 22249568 | 5.6052 | 7.6753 | -0.7957 |
| CEU | NPIP | 22254568 | 4.9858 | 6.1402 | -0.5432 |
| CEU | NPIP | 22259568 | 4.6114 | 5.458  | -0.4426 |
| CEU | NPIP | 22264568 | 4.679  | 6.4814 | -0.8079 |
| CEU | NPIP | 22269568 | 4.4591 | 7.1636 | -1.1071 |
| CEU | NPIP | 22274568 | 3.1459 | 5.7991 | -1.3141 |
| CEU | NPIP | 22279568 | 2.2987 | 5.7991 | -1.7337 |
| CEU | NPIP | 22284568 | 2.569  | 6.9931 | -1.8511 |
| CEU | NPIP | 22289568 | 3.055  | 5.9697 | -1.4067 |
| CEU | NPIP | 22294568 | 3.6275 | 5.458  | -0.9569 |
| CEU | NPIP | 22299568 | 3.9262 | 6.4814 | -1.1453 |
| CEU | NPIP | 22304568 | 3.0136 | 6.8225 | -1.6298 |
| CEU | NPIP | 22309568 | 2.2424 | 7.6753 | -2.0883 |
| CEU | NPIP | 22314568 | 2.6294 | 8.5281 | -2.0581 |
| CEU | NPIP | 22319568 | 1.8116 | 5.2874 | -1.869  |
| CEU | NPIP | 22324568 | 1.5838 | 3.9229 | -1.6315 |
| CEU | NPIP | 22329568 | 2.2562 | 5.9697 | -1.7922 |
| CEU | NPIP | 22334568 | 1.5217 | 4.6052 | -1.8721 |
| CEU | NPIP | 22339568 | 1.6042 | 4.4346 | -1.7759 |
| CEU | NPIP | 22344568 | 2.2367 | 4.7757 | -1.4933 |
| CEU | NPIP | 22349568 | 1.4539 | 3.0701 | -1.3864 |
| CHB | NPIP | 21339568 | 2.3697 | 7.7931 | -2.0498 |
| CHB | NPIP | 21344568 | 3.0788 | 7.2848 | -1.6907 |
| CHB | NPIP | 21349568 | 3.9806 | 6.7766 | -1.2002 |
| CHB | NPIP | 21354568 | 4.7725 | 7.9625 | -1.1821 |
| CHB | NPIP | 21359568 | 3.3735 | 8.979  | -1.8595 |
| CHB | NPIP | 21364568 | 3.1784 | 8.3013 | -1.8271 |
| CHB | NPIP | 21369568 | 3.368  | 7.6237 | -1.6411 |
| CHB | NPIP | 21374568 | 2.1702 | 7.1154 | -2.0308 |
| CHB | NPIP | 21379568 | 3.3436 | 9.1484 | -1.8926 |
| CHB | NPIP | 21384568 | 3.8426 | 9.1484 | -1.7299 |
| CHB | NPIP | 21389568 | 3.2039 | 6.7766 | -1.5336 |
| CHB | NPIP | 21394568 | 2.3522 | 4.5742 | -1.353  |
| CHB | NPIP | 21399568 | 1.0668 | 2.033  | -1.1522 |
| CHB | NPIP | 21404568 | 0.4428 | 2.033  | -1.8963 |
| CHB | NPIP | 21409568 | 0.3278 | 2.033  | -2.0335 |
| CHB | NPIP | 21414568 | 0.4546 | 1.3553 | -1.4598 |
| CHB | NPIP | 21419568 | 0.1946 | 0.3388 | -0.5784 |
| CHB | NPIP | 21424568 | 0      | 0      | 0       |
| CHB | NPIP | 21429568 | 0.2397 | 0.3388 | -0.3975 |
| CHB | NPIP | 21434568 | 0.2397 | 0.3388 | -0.3975 |
| CHB | NPIP | 21439568 | 0      | 0      | 0       |
| CHB | NPIP | 21444568 | 0      | 0      | 0       |
| CHB | NPIP | 21449568 | 0      | 0      | 0       |
| CHB | NPIP | 21454568 | 0      | 0      | 0       |
| CHB | NPIP | 21459568 | 0      | 0      | 0       |

## 2\_TajimasD\_data

|     |      |          |         |         |         |
|-----|------|----------|---------|---------|---------|
| CHB | NPIP | 21464568 | 0       | 0       | 0       |
| CHB | NPIP | 21469568 | 0.7377  | 0.8471  | -0.2467 |
| CHB | NPIP | 21474568 | 1.3002  | 1.1859  | 0.204   |
| CHB | NPIP | 21479568 | 0.8458  | 0.6777  | 0.4395  |
| CHB | NPIP | 21484568 | 1.5898  | 2.033   | -0.5285 |
| CHB | NPIP | 21489568 | 1.7407  | 2.5412  | -0.7994 |
| CHB | NPIP | 21494568 | 0.9063  | 1.8636  | -1.2214 |
| CHB | NPIP | 21499568 | 0.5195  | 1.1859  | -1.1895 |
| CHB | NPIP | 21504568 | 0.0474  | 0.1694  | -0.7249 |
| CHB | NPIP | 21509568 | 0.4679  | 1.8636  | -1.7807 |
| CHB | NPIP | 21514568 | 2.5955  | 7.2848  | -1.8849 |
| CHB | NPIP | 21519568 | 7.9815  | 10.1649 | -0.6454 |
| CHB | NPIP | 21524568 | 11.0659 | 10.3343 | 0.213   |
| CHB | NPIP | 21529568 | 7.2718  | 9.4872  | -0.6983 |
| CHB | NPIP | 21534568 | 7.1494  | 9.9955  | -0.8546 |
| CHB | NPIP | 21539568 | 8.4394  | 10.5037 | -0.5918 |
| CHB | NPIP | 21544568 | 5.3655  | 8.1319  | -1.0055 |
| CHB | NPIP | 21549568 | 5.0352  | 6.7766  | -0.7475 |
| CHB | NPIP | 21554568 | 4.0468  | 6.4378  | -1.0751 |
| CHB | NPIP | 21559568 | 2.3684  | 7.6237  | -2.0266 |
| CHB | NPIP | 21564568 | 2.7856  | 6.946   | -1.7464 |
| CHB | NPIP | 21569568 | 4.9964  | 6.6072  | -0.7075 |
| CHB | NPIP | 21574568 | 6.8214  | 6.7766  | 0.0192  |
| CHB | NPIP | 21579568 | 5.1262  | 6.946   | -0.7639 |
| CHB | NPIP | 21584568 | 4.6882  | 7.9625  | -1.2134 |
| CHB | NPIP | 21589568 | 4.7794  | 7.2848  | -1.0071 |
| CHB | NPIP | 21594568 | 5.7569  | 6.4378  | -0.3062 |
| CHB | NPIP | 21599568 | 5.6478  | 6.2684  | -0.2858 |
| CHB | NPIP | 21604568 | 4.2505  | 5.7601  | -0.75   |
| CHB | NPIP | 21609568 | 6.1881  | 6.4378  | -0.1123 |
| CHB | NPIP | 21614568 | 5.3773  | 6.2684  | -0.4104 |
| CHB | NPIP | 21619568 | 4.8711  | 6.6072  | -0.7625 |
| CHB | NPIP | 21624568 | 5.7026  | 6.6072  | -0.3973 |
| CHB | NPIP | 21629568 | 5.4938  | 6.2684  | -0.3568 |
| CHB | NPIP | 21634568 | 5.6924  | 6.946   | -0.5262 |
| CHB | NPIP | 21639568 | 6.5667  | 8.4708  | -0.6666 |
| CHB | NPIP | 21644568 | 7.6486  | 10.5037 | -0.8185 |
| CHB | NPIP | 21649568 | 7.082   | 8.8096  | -0.5833 |
| CHB | NPIP | 21654568 | 5.0817  | 6.0989  | -0.4802 |
| CHB | NPIP | 21659568 | 2.8106  | 4.5742  | -1.0739 |
| CHB | NPIP | 21664568 | 3.9317  | 5.9295  | -0.9672 |
| CHB | NPIP | 21669568 | 6.4439  | 8.1319  | -0.6135 |
| CHB | NPIP | 21674568 | 6.8429  | 8.4708  | -0.5699 |
| CHB | NPIP | 21679568 | 6.1232  | 7.6237  | -0.5786 |
| CHB | NPIP | 21684568 | 8.0392  | 7.1154  | 0.3794  |
| CHB | NPIP | 21689568 | 10.6427 | 7.2848  | 1.3498  |
| CHB | NPIP | 21694568 | 6.8785  | 6.0989  | 0.368   |
| CHB | NPIP | 21699568 | 3.6514  | 5.9295  | -1.1029 |
| CHB | NPIP | 21704568 | 6.0659  | 7.6237  | -0.6007 |

## 2\_TajimasD\_data

|     |      |          |         |        |         |
|-----|------|----------|---------|--------|---------|
| CHB | NPIP | 21709568 | 7.6419  | 7.7931 | -0.0571 |
| CHB | NPIP | 21714568 | 6.5532  | 7.6237 | -0.4128 |
| CHB | NPIP | 21719568 | 4.6777  | 7.4543 | -1.0929 |
| CHB | NPIP | 21724568 | 6.0832  | 7.6237 | -0.5941 |
| CHB | NPIP | 21729568 | 9.494   | 9.1484 | 0.1127  |
| CHB | NPIP | 21734568 | 13.0942 | 9.9955 | 0.9305  |
| CHB | NPIP | 21739568 | 10.8698 | 7.2848 | 1.4411  |
| CHB | NPIP | 21744568 | 7.7021  | 5.7601 | 0.9648  |
| CHB | NPIP | 21749568 | 6.7984  | 4.5742 | 1.3544  |
| CHB | NPIP | 21754568 | 3.2564  | 2.033  | 1.4589  |
| CHB | NPIP | 21759568 | 2.5395  | 1.8636 | 0.8624  |
| CHB | NPIP | 21764568 | 3.4274  | 3.2189 | 0.1714  |
| CHB | NPIP | 21769568 | 5.8528  | 5.2519 | 0.3241  |
| CHB | NPIP | 21774568 | 7.8355  | 5.9295 | 0.9227  |
| CHB | NPIP | 21779568 | 6.8894  | 5.7601 | 0.5611  |
| CHB | NPIP | 21784568 | 5.9501  | 5.4213 | 0.2773  |
| CHB | NPIP | 21789568 | 4.3802  | 3.5577 | 0.6216  |
| CHB | NPIP | 21794568 | 2.5711  | 2.2024 | 0.4128  |
| CHB | NPIP | 21799568 | 1.9404  | 1.8636 | 0.098   |
| CHB | NPIP | 21804568 | 4.6701  | 4.066  | 0.4074  |
| CHB | NPIP | 21809568 | 5.1083  | 5.5907 | -0.2461 |
| CHB | NPIP | 21814568 | 5.0029  | 7.1154 | -0.8675 |
| CHB | NPIP | 21819568 | 7.2943  | 8.4708 | -0.4119 |
| CHB | NPIP | 21824568 | 5.5757  | 7.1154 | -0.6323 |
| CHB | NPIP | 21829568 | 5.8464  | 8.4708 | -0.9187 |
| CHB | NPIP | 21834568 | 5.0621  | 9.3178 | -1.3641 |
| CHB | NPIP | 21839568 | 3.6562  | 7.4543 | -1.495  |
| CHB | NPIP | 21844568 | 3.23    | 4.7436 | -0.8928 |
| CHB | NPIP | 21849568 | 1.0805  | 1.8636 | -0.9991 |
| CHB | NPIP | 21854568 | 0.8696  | 0.5082 | 1.1345  |
| CHB | NPIP | 21859568 | 0.6318  | 0.5082 | 0.388   |
| CHB | NPIP | 21864568 | 0.0192  | 0.1694 | -0.8925 |
| CHB | NPIP | 21869568 | 0.0097  | 0.1694 | -0.949  |
| CHB | NPIP | 21874568 | 0.0097  | 0.1694 | -0.949  |
| CHB | NPIP | 21879568 | 0       | 0      | 0       |
| CHB | NPIP | 21884568 | 0.0672  | 0.3388 | -1.0895 |
| CHB | NPIP | 21889568 | 0.4967  | 0.5082 | -0.0361 |
| CHB | NPIP | 21894568 | 1.5898  | 1.3553 | 0.3801  |
| CHB | NPIP | 21899568 | 1.7807  | 3.5577 | -1.343  |
| CHB | NPIP | 21904568 | 2.8157  | 4.5742 | -1.0708 |
| CHB | NPIP | 21909568 | 4.0211  | 3.8965 | 0.0871  |
| CHB | NPIP | 21914568 | 1.8355  | 1.8636 | -0.0359 |
| CHB | NPIP | 21919568 | 0.4799  | 0.3388 | 0.566   |
| CHB | NPIP | 21924568 | 0.538   | 1.1859 | -1.1565 |
| CHB | NPIP | 21929568 | 0.6629  | 1.5247 | -1.2803 |
| CHB | NPIP | 21934568 | 0.6821  | 1.3553 | -1.091  |
| CHB | NPIP | 21939568 | 0.3779  | 2.2024 | -2.0429 |
| CHB | NPIP | 21944568 | 2.1146  | 3.8965 | -1.2463 |
| CHB | NPIP | 21949568 | 2.4727  | 4.7436 | -1.3395 |

## 2\_TajimasD\_data

|     |      |          |        |        |         |
|-----|------|----------|--------|--------|---------|
| CHB | NPIP | 21954568 | 1.8709 | 4.066  | -1.4802 |
| CHB | NPIP | 21959568 | 3.0381 | 4.913  | -1.0724 |
| CHB | NPIP | 21964568 | 3.8959 | 5.9295 | -0.9845 |
| CHB | NPIP | 21969568 | 2.8907 | 4.913  | -1.1567 |
| CHB | NPIP | 21974568 | 3.352  | 4.7436 | -0.8209 |
| CHB | NPIP | 21979568 | 4.8123 | 6.7766 | -0.8432 |
| CHB | NPIP | 21984568 | 2.4259 | 5.9295 | -1.6961 |
| CHB | NPIP | 21989568 | 1.8132 | 5.2519 | -1.8546 |
| CHB | NPIP | 21994568 | 3.49   | 5.4213 | -1.0127 |
| CHB | NPIP | 21999568 | 2.7508 | 4.7436 | -1.1755 |
| CHB | NPIP | 22004568 | 1.1551 | 4.5742 | -2.082  |
| CHB | NPIP | 22009568 | 2.1656 | 4.7436 | -1.5207 |
| CHB | NPIP | 22014568 | 4.3031 | 5.4213 | -0.5864 |
| CHB | NPIP | 22019568 | 4.933  | 4.2354 | 0.4541  |
| CHB | NPIP | 22024568 | 3.2621 | 4.066  | -0.5421 |
| CHB | NPIP | 22029568 | 1.4034 | 3.8965 | -1.7437 |
| CHB | NPIP | 22034568 | 3.1449 | 3.8965 | -0.5257 |
| CHB | NPIP | 22039568 | 3.723  | 3.8965 | -0.1213 |
| CHB | NPIP | 22044568 | 1.8159 | 3.2189 | -1.1535 |
| CHB | NPIP | 22049568 | 1.447  | 2.7106 | -1.1973 |
| CHB | NPIP | 22054568 | 2.7249 | 4.2354 | -0.9833 |
| CHB | NPIP | 22059568 | 4.613  | 5.9295 | -0.6373 |
| CHB | NPIP | 22064568 | 3.9338 | 4.4048 | -0.2964 |
| CHB | NPIP | 22069568 | 3.8572 | 5.2519 | -0.7522 |
| CHB | NPIP | 22074568 | 3.5542 | 4.913  | -0.7772 |
| CHB | NPIP | 22079568 | 3.5439 | 4.2354 | -0.4502 |
| CHB | NPIP | 22084568 | 3.3017 | 4.913  | -0.9217 |
| CHB | NPIP | 22089568 | 1.7864 | 4.066  | -1.5372 |
| CHB | NPIP | 22094568 | 1.8289 | 3.3883 | -1.2281 |
| CHB | NPIP | 22099568 | 0.7    | 2.2024 | -1.6823 |
| CHB | NPIP | 22104568 | 2.3733 | 4.066  | -1.1414 |
| CHB | NPIP | 22109568 | 3.1997 | 4.2354 | -0.6742 |
| CHB | NPIP | 22114568 | 2.107  | 5.5907 | -1.7775 |
| CHB | NPIP | 22119568 | 2.7805 | 7.1154 | -1.7802 |
| CHB | NPIP | 22124568 | 4.4418 | 5.9295 | -0.7202 |
| CHB | NPIP | 22129568 | 4.3817 | 6.946  | -1.0764 |
| CHB | NPIP | 22134568 | 5.8963 | 7.7931 | -0.7169 |
| CHB | NPIP | 22139568 | 7.6879 | 8.6402 | -0.3273 |
| CHB | NPIP | 22144568 | 6.089  | 7.4543 | -0.5374 |
| CHB | NPIP | 22149568 | 3.5297 | 5.5907 | -1.0516 |
| CHB | NPIP | 22154568 | 3.1308 | 5.7601 | -1.3063 |
| CHB | NPIP | 22159568 | 3.8346 | 6.6072 | -1.2178 |
| CHB | NPIP | 22164568 | 3.1936 | 6.7766 | -1.5381 |
| CHB | NPIP | 22169568 | 4.2922 | 6.4378 | -0.9647 |
| CHB | NPIP | 22174568 | 3.6532 | 6.2684 | -1.2045 |
| CHB | NPIP | 22179568 | 2.9747 | 6.946  | -1.667  |
| CHB | NPIP | 22184568 | 4.3    | 7.4543 | -1.2416 |
| CHB | NPIP | 22189568 | 5.2658 | 7.7931 | -0.9552 |
| CHB | NPIP | 22194568 | 5.5285 | 8.3013 | -0.9889 |

## 2\_TajimasD\_data

|     |      |          |         |         |         |
|-----|------|----------|---------|---------|---------|
| CHB | NPIP | 22199568 | 4.3583  | 7.9625  | -1.3356 |
| CHB | NPIP | 22204568 | 6.1296  | 9.1484  | -0.9842 |
| CHB | NPIP | 22209568 | 7.301   | 9.1484  | -0.6023 |
| CHB | NPIP | 22214568 | 4.4072  | 7.1154  | -1.1122 |
| CHB | NPIP | 22219568 | 6.8119  | 7.6237  | -0.3131 |
| CHB | NPIP | 22224568 | 11.0699 | 9.3178  | 0.5616  |
| CHB | NPIP | 22229568 | 10.4353 | 8.4708  | 0.6877  |
| CHB | NPIP | 22234568 | 8.0591  | 6.6072  | 0.6377  |
| CHB | NPIP | 22239568 | 8.9684  | 7.7931  | 0.4442  |
| CHB | NPIP | 22244568 | 8.7468  | 7.9625  | 0.2906  |
| CHB | NPIP | 22249568 | 5.2208  | 6.6072  | -0.6089 |
| CHB | NPIP | 22254568 | 5.4312  | 7.2848  | -0.7451 |
| CHB | NPIP | 22259568 | 5.3739  | 6.4378  | -0.4784 |
| CHB | NPIP | 22264568 | 3.7243  | 6.7766  | -1.3102 |
| CHB | NPIP | 22269568 | 2.6912  | 7.7931  | -1.9283 |
| CHB | NPIP | 22274568 | 2.3779  | 6.6072  | -1.8576 |
| CHB | NPIP | 22279568 | 1.763   | 6.946   | -2.1756 |
| CHB | NPIP | 22284568 | 1.7085  | 7.2848  | -2.2415 |
| CHB | NPIP | 22289568 | 2.1799  | 7.4543  | -2.0761 |
| CHB | NPIP | 22294568 | 3.1496  | 7.1154  | -1.6286 |
| CHB | NPIP | 22299568 | 5.3442  | 9.1484  | -1.2403 |
| CHB | NPIP | 22304568 | 5.3587  | 11.1814 | -1.5744 |
| CHB | NPIP | 22309568 | 3.7647  | 9.4872  | -1.8039 |
| CHB | NPIP | 22314568 | 3.5462  | 7.9625  | -1.6365 |
| CHB | NPIP | 22319568 | 3.3211  | 6.6072  | -1.4433 |
| CHB | NPIP | 22324568 | 4.0394  | 7.1154  | -1.2632 |
| CHB | NPIP | 22329568 | 4.3409  | 7.6237  | -1.2659 |
| CHB | NPIP | 22334568 | 3.5212  | 7.1154  | -1.476  |
| CHB | NPIP | 22339568 | 4.1711  | 7.6237  | -1.3314 |
| CHB | NPIP | 22344568 | 3.8315  | 6.6072  | -1.2191 |
| CHB | NPIP | 22349568 | 2.3638  | 5.5907  | -1.6464 |
| YRI | NPIP | 21339568 | 4.5369  | 10.4199 | -1.6935 |
| YRI | NPIP | 21344568 | 4.1475  | 11.5963 | -1.9397 |
| YRI | NPIP | 21349568 | 3.9524  | 10.756  | -1.9012 |
| YRI | NPIP | 21354568 | 5.155   | 11.0921 | -1.612  |
| YRI | NPIP | 21359568 | 4.7644  | 11.5963 | -1.7791 |
| YRI | NPIP | 21364568 | 5.7805  | 13.2769 | -1.7181 |
| YRI | NPIP | 21369568 | 4.285   | 11.2602 | -1.8673 |
| YRI | NPIP | 21374568 | 2.8633  | 10.0837 | -2.1431 |
| YRI | NPIP | 21379568 | 4.54    | 12.6047 | -1.9414 |
| YRI | NPIP | 21384568 | 3.9554  | 10.756  | -1.9004 |
| YRI | NPIP | 21389568 | 3.1143  | 8.5712  | -1.8832 |
| YRI | NPIP | 21394568 | 2.1758  | 5.8822  | -1.801  |
| YRI | NPIP | 21399568 | 1.1652  | 2.689   | -1.4482 |
| YRI | NPIP | 21404568 | 1.7998  | 3.3612  | -1.2336 |
| YRI | NPIP | 21409568 | 1.5992  | 3.6974  | -1.5293 |
| YRI | NPIP | 21414568 | 0.7333  | 2.0167  | -1.5345 |
| YRI | NPIP | 21419568 | 0.3612  | 0.3361  | 0.1008  |
| YRI | NPIP | 21424568 | 0.0456  | 0.1681  | -0.7282 |

## 2\_TajimasD\_data

|     |      |          |        |         |         |
|-----|------|----------|--------|---------|---------|
| YRI | NPIP | 21429568 | 0.2217 | 0.5042  | -0.8878 |
| YRI | NPIP | 21434568 | 0.1854 | 0.5042  | -1.0019 |
| YRI | NPIP | 21439568 | 0.0093 | 0.1681  | -0.944  |
| YRI | NPIP | 21444568 | 0      | 0       | 0       |
| YRI | NPIP | 21449568 | 0      | 0       | 0       |
| YRI | NPIP | 21454568 | 0      | 0       | 0       |
| YRI | NPIP | 21459568 | 0      | 0       | 0       |
| YRI | NPIP | 21464568 | 0.0638 | 0.5042  | -1.384  |
| YRI | NPIP | 21469568 | 0.6097 | 1.6806  | -1.4732 |
| YRI | NPIP | 21474568 | 0.9953 | 2.1848  | -1.3356 |
| YRI | NPIP | 21479568 | 0.4586 | 1.1764  | -1.2838 |
| YRI | NPIP | 21484568 | 0.2626 | 1.5126  | -1.8613 |
| YRI | NPIP | 21489568 | 0.5563 | 2.0167  | -1.7461 |
| YRI | NPIP | 21494568 | 0.7517 | 2.689   | -1.8411 |
| YRI | NPIP | 21499568 | 0.4488 | 2.0167  | -1.8747 |
| YRI | NPIP | 21504568 | 0      | 0       | 0       |
| YRI | NPIP | 21509568 | 0.9907 | 3.3612  | -1.8728 |
| YRI | NPIP | 21514568 | 3.17   | 8.9073  | -1.9109 |
| YRI | NPIP | 21519568 | 4.7857 | 13.1089 | -1.9307 |
| YRI | NPIP | 21524568 | 5.5592 | 14.9575 | -1.9234 |
| YRI | NPIP | 21529568 | 4.1316 | 12.2685 | -2.0094 |
| YRI | NPIP | 21534568 | 3.4214 | 12.6047 | -2.2107 |
| YRI | NPIP | 21539568 | 4.1558 | 14.9575 | -2.2107 |
| YRI | NPIP | 21544568 | 3.4292 | 13.1089 | -2.2454 |
| YRI | NPIP | 21549568 | 3.4517 | 10.924  | -2.058  |
| YRI | NPIP | 21554568 | 3.0678 | 8.9073  | -1.9449 |
| YRI | NPIP | 21559568 | 2.6946 | 9.4115  | -2.1258 |
| YRI | NPIP | 21564568 | 2.7246 | 9.7476  | -2.1514 |
| YRI | NPIP | 21569568 | 4.3977 | 10.4199 | -1.7336 |
| YRI | NPIP | 21574568 | 5.2443 | 10.5879 | -1.5154 |
| YRI | NPIP | 21579568 | 3.7625 | 8.5712  | -1.6595 |
| YRI | NPIP | 21584568 | 3.4837 | 9.0754  | -1.8304 |
| YRI | NPIP | 21589568 | 3.0854 | 9.7476  | -2.0409 |
| YRI | NPIP | 21594568 | 3.427  | 9.7476  | -1.9362 |
| YRI | NPIP | 21599568 | 2.8569 | 8.067   | -1.9012 |
| YRI | NPIP | 21604568 | 2.3335 | 6.5544  | -1.8609 |
| YRI | NPIP | 21609568 | 3.8835 | 7.3947  | -1.3875 |
| YRI | NPIP | 21614568 | 3.1521 | 6.5544  | -1.5    |
| YRI | NPIP | 21619568 | 2.8429 | 6.2183  | -1.5604 |
| YRI | NPIP | 21624568 | 3.9046 | 6.7225  | -1.2142 |
| YRI | NPIP | 21629568 | 3.4835 | 7.0586  | -1.4738 |
| YRI | NPIP | 21634568 | 3.787  | 7.3947  | -1.4256 |
| YRI | NPIP | 21639568 | 4.8927 | 8.9073  | -1.3371 |
| YRI | NPIP | 21644568 | 4.4476 | 10.5879 | -1.7414 |
| YRI | NPIP | 21649568 | 2.8288 | 7.5628  | -1.8327 |
| YRI | NPIP | 21654568 | 1.9335 | 4.8738  | -1.6878 |
| YRI | NPIP | 21659568 | 1.7159 | 5.0419  | -1.8531 |
| YRI | NPIP | 21664568 | 2.2055 | 6.0502  | -1.8216 |
| YRI | NPIP | 21669568 | 4.2612 | 6.8906  | -1.1079 |

## 2\_TajimasD\_data

|     |      |          |         |         |         |
|-----|------|----------|---------|---------|---------|
| YRI | NPIP | 21674568 | 6.1342  | 8.4031  | -0.7974 |
| YRI | NPIP | 21679568 | 6.4651  | 9.5795  | -0.9696 |
| YRI | NPIP | 21684568 | 9.0774  | 9.9157  | -0.2527 |
| YRI | NPIP | 21689568 | 10.7749 | 9.7476  | 0.3147  |
| YRI | NPIP | 21694568 | 6.7452  | 8.9073  | -0.7201 |
| YRI | NPIP | 21699568 | 3.8967  | 7.7309  | -1.4548 |
| YRI | NPIP | 21704568 | 5.5236  | 7.2267  | -0.6872 |
| YRI | NPIP | 21709568 | 7.1346  | 7.0586  | 0.0313  |
| YRI | NPIP | 21714568 | 6.6251  | 7.2267  | -0.2428 |
| YRI | NPIP | 21719568 | 5.5053  | 7.8989  | -0.8905 |
| YRI | NPIP | 21724568 | 6.2651  | 7.5628  | -0.5024 |
| YRI | NPIP | 21729568 | 8.6343  | 8.9073  | -0.0909 |
| YRI | NPIP | 21734568 | 8.8269  | 10.4199 | -0.4586 |
| YRI | NPIP | 21739568 | 5.1669  | 8.235   | -1.0986 |
| YRI | NPIP | 21744568 | 3.564   | 6.2183  | -1.2271 |
| YRI | NPIP | 21749568 | 3.58    | 4.2016  | -0.406  |
| YRI | NPIP | 21754568 | 1.3817  | 1.8487  | -0.5973 |
| YRI | NPIP | 21759568 | 1.0344  | 2.1848  | -1.2916 |
| YRI | NPIP | 21764568 | 2.0852  | 3.5293  | -1.0949 |
| YRI | NPIP | 21769568 | 2.4271  | 5.0419  | -1.4569 |
| YRI | NPIP | 21774568 | 3.248   | 6.3864  | -1.4165 |
| YRI | NPIP | 21779568 | 4.1936  | 7.8989  | -1.3785 |
| YRI | NPIP | 21784568 | 4.6372  | 7.3947  | -1.0896 |
| YRI | NPIP | 21789568 | 2.7246  | 4.0335  | -0.8856 |
| YRI | NPIP | 21794568 | 1.0532  | 3.5293  | -1.8774 |
| YRI | NPIP | 21799568 | 0.8566  | 3.1932  | -1.9271 |
| YRI | NPIP | 21804568 | 3.2984  | 5.5461  | -1.151  |
| YRI | NPIP | 21809568 | 4.0375  | 8.5712  | -1.5646 |
| YRI | NPIP | 21814568 | 4.0397  | 8.5712  | -1.5638 |
| YRI | NPIP | 21819568 | 5.7964  | 10.2518 | -1.3022 |
| YRI | NPIP | 21824568 | 4.2907  | 9.0754  | -1.5663 |
| YRI | NPIP | 21829568 | 3.7806  | 9.4115  | -1.7821 |
| YRI | NPIP | 21834568 | 3.3391  | 10.0837 | -2.0019 |
| YRI | NPIP | 21839568 | 2.7636  | 7.8989  | -1.9104 |
| YRI | NPIP | 21844568 | 3.3132  | 5.8822  | -1.2483 |
| YRI | NPIP | 21849568 | 1.7824  | 2.5209  | -0.7396 |
| YRI | NPIP | 21854568 | 0.2558  | 0.6722  | -1.0901 |
| YRI | NPIP | 21859568 | 0.3808  | 1.1764  | -1.423  |
| YRI | NPIP | 21864568 | 0.1615  | 0.6722  | -1.337  |
| YRI | NPIP | 21869568 | 0.0734  | 0.6722  | -1.5676 |
| YRI | NPIP | 21874568 | 0.0826  | 0.8403  | -1.7114 |
| YRI | NPIP | 21879568 | 0.0093  | 0.1681  | -0.944  |
| YRI | NPIP | 21884568 | 0.4369  | 0.3361  | 0.4047  |
| YRI | NPIP | 21889568 | 0.7217  | 0.6722  | 0.1296  |
| YRI | NPIP | 21894568 | 1.0818  | 2.1848  | -1.2384 |
| YRI | NPIP | 21899568 | 2.2291  | 5.5461  | -1.6986 |
| YRI | NPIP | 21904568 | 3.4065  | 6.3864  | -1.3449 |
| YRI | NPIP | 21909568 | 3.1244  | 4.7057  | -0.9361 |
| YRI | NPIP | 21914568 | 1.1778  | 2.5209  | -1.3451 |

## 2\_TajimasD\_data

|     |      |          |        |        |         |
|-----|------|----------|--------|--------|---------|
| YRI | NPIP | 21919568 | 0.3918 | 0.6722 | -0.7341 |
| YRI | NPIP | 21924568 | 0.4282 | 0.6722 | -0.6388 |
| YRI | NPIP | 21929568 | 0.6409 | 1.1764 | -0.9578 |
| YRI | NPIP | 21934568 | 0.8498 | 1.5126 | -0.9869 |
| YRI | NPIP | 21939568 | 1.1846 | 1.8487 | -0.8494 |
| YRI | NPIP | 21944568 | 3.6066 | 4.8738 | -0.7274 |
| YRI | NPIP | 21949568 | 3.8198 | 6.3864 | -1.1584 |
| YRI | NPIP | 21954568 | 3.2913 | 5.2099 | -1.0385 |
| YRI | NPIP | 21959568 | 5.5055 | 7.2267 | -0.6945 |
| YRI | NPIP | 21964568 | 6.3904 | 8.4031 | -0.7074 |
| YRI | NPIP | 21969568 | 3.8204 | 7.5628 | -1.4488 |
| YRI | NPIP | 21974568 | 2.3295 | 7.7309 | -2.0494 |
| YRI | NPIP | 21979568 | 3.2519 | 8.067  | -1.7571 |
| YRI | NPIP | 21984568 | 2.3564 | 6.3864 | -1.8189 |
| YRI | NPIP | 21989568 | 1.7929 | 6.7225 | -2.1242 |
| YRI | NPIP | 21994568 | 2.9928 | 7.0586 | -1.6761 |
| YRI | NPIP | 21999568 | 2.4829 | 6.0502 | -1.6902 |
| YRI | NPIP | 22004568 | 1.3253 | 5.0419 | -2.0708 |
| YRI | NPIP | 22009568 | 2.7816 | 5.5461 | -1.4157 |
| YRI | NPIP | 22014568 | 4.5846 | 8.235  | -1.307  |
| YRI | NPIP | 22019568 | 4.8641 | 7.5628 | -1.0447 |
| YRI | NPIP | 22024568 | 2.854  | 6.5544 | -1.6314 |
| YRI | NPIP | 22029568 | 2.7561 | 6.5544 | -1.6746 |
| YRI | NPIP | 22034568 | 4.1571 | 6.7225 | -1.1054 |
| YRI | NPIP | 22039568 | 3.4046 | 6.0502 | -1.2535 |
| YRI | NPIP | 22044568 | 3.1354 | 6.7225 | -1.5457 |
| YRI | NPIP | 22049568 | 2.8079 | 7.2267 | -1.7831 |
| YRI | NPIP | 22054568 | 3.5405 | 7.3947 | -1.523  |
| YRI | NPIP | 22059568 | 3.8349 | 6.7225 | -1.2443 |
| YRI | NPIP | 22064568 | 2.7945 | 5.0419 | -1.2522 |
| YRI | NPIP | 22069568 | 3.0319 | 5.7141 | -1.3375 |
| YRI | NPIP | 22074568 | 1.8266 | 4.0335 | -1.4932 |
| YRI | NPIP | 22079568 | 3.2724 | 4.7057 | -0.8484 |
| YRI | NPIP | 22084568 | 3.5503 | 5.5461 | -1.022  |
| YRI | NPIP | 22089568 | 1.4378 | 6.0502 | -2.1854 |
| YRI | NPIP | 22094568 | 1.9843 | 7.0586 | -2.0919 |
| YRI | NPIP | 22099568 | 1.9031 | 4.8738 | -1.7053 |
| YRI | NPIP | 22104568 | 3.3569 | 5.7141 | -1.1754 |
| YRI | NPIP | 22109568 | 3.3754 | 6.3864 | -1.359  |
| YRI | NPIP | 22114568 | 2.8111 | 7.0586 | -1.751  |
| YRI | NPIP | 22119568 | 2.7836 | 7.8989 | -1.903  |
| YRI | NPIP | 22124568 | 4.1363 | 7.3947 | -1.2876 |
| YRI | NPIP | 22129568 | 4.8179 | 7.2267 | -0.972  |
| YRI | NPIP | 22134568 | 5.532  | 9.0754 | -1.1599 |
| YRI | NPIP | 22139568 | 6.2581 | 9.5795 | -1.0341 |
| YRI | NPIP | 22144568 | 4.5678 | 7.0586 | -1.0268 |
| YRI | NPIP | 22149568 | 4.3416 | 6.5544 | -0.9756 |
| YRI | NPIP | 22154568 | 4.2558 | 7.2267 | -1.1988 |
| YRI | NPIP | 22159568 | 3.519  | 9.0754 | -1.8189 |



## 2\_TajimasD\_data

|     |      |          |         |         |         |
|-----|------|----------|---------|---------|---------|
| YRI | NPIP | 22164568 | 3.0999  | 9.4115  | -1.9976 |
| YRI | NPIP | 22169568 | 5.1075  | 9.4115  | -1.3622 |
| YRI | NPIP | 22174568 | 5.634   | 10.924  | -1.457  |
| YRI | NPIP | 22179568 | 3.8218  | 8.235   | -1.5802 |
| YRI | NPIP | 22184568 | 5.9219  | 7.3947  | -0.582  |
| YRI | NPIP | 22189568 | 7.9142  | 10.4199 | -0.7213 |
| YRI | NPIP | 22194568 | 8.2093  | 9.9157  | -0.5145 |
| YRI | NPIP | 22199568 | 6.4404  | 8.235   | -0.6426 |
| YRI | NPIP | 22204568 | 7.8673  | 9.5795  | -0.5331 |
| YRI | NPIP | 22209568 | 9.498   | 11.0921 | -0.4328 |
| YRI | NPIP | 22214568 | 5.717   | 8.9073  | -1.0626 |
| YRI | NPIP | 22219568 | 6.6861  | 8.235   | -0.5546 |
| YRI | NPIP | 22224568 | 9.371   | 10.5879 | -0.3451 |
| YRI | NPIP | 22229568 | 10.3648 | 11.0921 | -0.1975 |
| YRI | NPIP | 22234568 | 9.2705  | 9.4115  | -0.0446 |
| YRI | NPIP | 22239568 | 8.6796  | 9.2434  | -0.1814 |
| YRI | NPIP | 22244568 | 9.1413  | 11.0921 | -0.5297 |
| YRI | NPIP | 22249568 | 8.0982  | 10.4199 | -0.6683 |
| YRI | NPIP | 22254568 | 8.5806  | 10.5879 | -0.5693 |
| YRI | NPIP | 22259568 | 7.8544  | 10.5879 | -0.7752 |
| YRI | NPIP | 22264568 | 7.0812  | 8.5712  | -0.5142 |
| YRI | NPIP | 22269568 | 6.5974  | 8.9073  | -0.7693 |
| YRI | NPIP | 22274568 | 7.1291  | 9.7476  | -0.8021 |
| YRI | NPIP | 22279568 | 8.9525  | 9.0754  | -0.0402 |
| YRI | NPIP | 22284568 | 9.3867  | 9.4115  | -0.0078 |
| YRI | NPIP | 22289568 | 8.4825  | 10.924  | -0.6724 |
| YRI | NPIP | 22294568 | 8.9122  | 10.2518 | -0.3915 |
| YRI | NPIP | 22299568 | 11.6263 | 12.6047 | -0.2355 |
| YRI | NPIP | 22304568 | 10.1963 | 13.7811 | -0.7931 |
| YRI | NPIP | 22309568 | 8.5489  | 10.4199 | -0.5386 |
| YRI | NPIP | 22314568 | 8.2536  | 10.0837 | -0.5432 |
| YRI | NPIP | 22319568 | 5.5836  | 9.4115  | -1.2115 |
| YRI | NPIP | 22324568 | 5.2209  | 10.0837 | -1.4434 |
| YRI | NPIP | 22329568 | 5.5681  | 10.756  | -1.4497 |
| YRI | NPIP | 22334568 | 4.8126  | 9.7476  | -1.5118 |
| YRI | NPIP | 22339568 | 4.4785  | 11.4282 | -1.8347 |
| YRI | NPIP | 22344568 | 3.9425  | 9.9157  | -1.8009 |
| YRI | NPIP | 22349568 | 3.3444  | 6.5544  | -1.4152 |
| CEU | NPIP | 22008599 | 2.0641  | 4.7757  | -1.5948 |
| CEU | NPIP | 22013599 | 3.5067  | 5.9697  | -1.1887 |
| CEU | NPIP | 22018599 | 3.1148  | 5.1169  | -1.1082 |
| CEU | NPIP | 22023599 | 2.4929  | 4.0935  | -1.0763 |
| CEU | NPIP | 22028599 | 1.7539  | 3.0701  | -1.129  |
| CEU | NPIP | 22033599 | 1.8499  | 3.7524  | -1.3783 |
| CEU | NPIP | 22038599 | 1.9081  | 4.6052  | -1.6375 |
| CEU | NPIP | 22043599 | 1.3581  | 3.2407  | -1.5437 |
| CEU | NPIP | 22048599 | 1.3006  | 2.2173  | -1.0241 |
| CEU | NPIP | 22053599 | 1.9365  | 2.8996  | -0.8661 |
| CEU | NPIP | 22058599 | 2.5455  | 4.9463  | -1.3692 |

## 2\_TajimasD\_data

|     |      |          |        |        |         |
|-----|------|----------|--------|--------|---------|
| CEU | NPIP | 22063599 | 2.6423 | 5.2874 | -1.4223 |
| CEU | NPIP | 22068599 | 2.818  | 4.7757 | -1.1514 |
| CEU | NPIP | 22073599 | 2.3527 | 4.6052 | -1.3676 |
| CEU | NPIP | 22078599 | 2.3593 | 4.6052 | -1.3636 |
| CEU | NPIP | 22083599 | 3.1103 | 5.2874 | -1.1706 |
| CEU | NPIP | 22088599 | 2.3849 | 4.4346 | -1.2861 |
| CEU | NPIP | 22093599 | 1.2847 | 3.2407 | -1.6039 |
| CEU | NPIP | 22098599 | 0.5714 | 2.2173 | -1.8388 |
| CEU | NPIP | 22103599 | 2.0072 | 4.6052 | -1.5774 |
| CEU | NPIP | 22108599 | 1.9907 | 4.9463 | -1.6856 |
| CEU | NPIP | 22113599 | 1.0072 | 3.4112 | -1.8881 |
| CEU | NPIP | 22118599 | 1.752  | 4.4346 | -1.6832 |
| CEU | NPIP | 22123599 | 3.135  | 5.6286 | -1.2684 |
| CEU | NPIP | 22128599 | 3.8343 | 6.1402 | -1.0851 |
| CEU | NPIP | 22133599 | 4.6545 | 7.3342 | -1.0737 |
| CEU | NPIP | 22138599 | 6.8289 | 7.8459 | -0.3831 |
| CEU | NPIP | 22143599 | 6.8136 | 6.6519 | 0.0708  |
| CEU | NPIP | 22148599 | 4.2191 | 5.7991 | -0.7826 |
| CEU | NPIP | 22153599 | 2.9388 | 6.3108 | -1.5482 |
| CEU | NPIP | 22158599 | 2.8705 | 5.9697 | -1.4957 |
| CEU | NPIP | 22163599 | 1.8112 | 4.4346 | -1.646  |
| CEU | NPIP | 22168599 | 2.8093 | 5.2874 | -1.3325 |
| CEU | NPIP | 22173599 | 3.2476 | 5.9697 | -1.3137 |
| CEU | NPIP | 22178599 | 2.6751 | 5.6286 | -1.5023 |
| CEU | NPIP | 22183599 | 3.5302 | 5.1169 | -0.8783 |
| CEU | NPIP | 22188599 | 3.8021 | 5.2874 | -0.7987 |
| CEU | NPIP | 22193599 | 3.8299 | 5.458  | -0.8511 |
| CEU | NPIP | 22198599 | 4.4659 | 5.2874 | -0.4417 |
| CEU | NPIP | 22203599 | 5.9423 | 5.458  | 0.2532  |
| CEU | NPIP | 22208599 | 5.7829 | 5.7991 | -0.008  |
| CEU | NPIP | 22213599 | 3.5374 | 4.6052 | -0.6483 |
| CEU | NPIP | 22218599 | 4.8723 | 6.1402 | -0.5966 |
| CEU | NPIP | 22223599 | 6.8797 | 9.5515 | -0.8394 |
| CEU | NPIP | 22228599 | 6.8701 | 9.7221 | -0.8814 |
| CEU | NPIP | 22233599 | 8.2556 | 8.6987 | -0.1518 |
| CEU | NPIP | 22238599 | 7.6065 | 7.6753 | -0.0264 |
| CEU | NPIP | 22243599 | 5.4925 | 7.3342 | -0.7379 |
| CEU | NPIP | 22248599 | 6.1851 | 8.187  | -0.7252 |
| CEU | NPIP | 22253599 | 5.3115 | 6.4814 | -0.5244 |
| CEU | NPIP | 22258599 | 4.6316 | 5.2874 | -0.3526 |
| CEU | NPIP | 22263599 | 5.4745 | 6.9931 | -0.6354 |
| CEU | NPIP | 22268599 | 4.1344 | 6.8225 | -1.1502 |
| CEU | NPIP | 22273599 | 3.1204 | 6.1402 | -1.421  |
| CEU | NPIP | 22278599 | 2.7759 | 6.3108 | -1.6229 |
| CEU | NPIP | 22283599 | 2.5947 | 6.6519 | -1.7763 |
| CEU | NPIP | 22288599 | 2.9365 | 5.9697 | -1.4639 |
| CEU | NPIP | 22293599 | 3.207  | 5.458  | -1.1768 |
| CEU | NPIP | 22298599 | 3.7271 | 5.7991 | -1.0262 |
| CEU | NPIP | 22303599 | 3.3156 | 6.6519 | -1.4607 |

## 2\_TajimasD\_data

|     |      |          |        |        |         |
|-----|------|----------|--------|--------|---------|
| CEU | NPIP | 22308599 | 2.7671 | 8.187  | -1.9635 |
| CEU | NPIP | 22313599 | 2.6011 | 8.3576 | -2.0463 |
| CEU | NPIP | 22318599 | 1.8221 | 5.7991 | -1.9698 |
| CEU | NPIP | 22323599 | 1.5937 | 3.9229 | -1.6245 |
| CEU | NPIP | 22328599 | 2.0695 | 5.2874 | -1.7303 |
| CEU | NPIP | 22333599 | 1.7182 | 5.1169 | -1.8812 |
| CEU | NPIP | 22338599 | 1.751  | 4.7757 | -1.7789 |
| CEU | NPIP | 22343599 | 2.267  | 5.2874 | -1.6241 |
| CEU | NPIP | 22348599 | 1.5339 | 3.5818 | -1.5435 |
| CEU | NPIP | 22353599 | 1.3255 | 2.3879 | -1.1188 |
| CEU | NPIP | 22358599 | 1.1936 | 2.5584 | -1.3596 |
| CEU | NPIP | 22363599 | 0.5312 | 2.0467 | -1.8033 |
| CEU | NPIP | 22368599 | 0.9829 | 2.2173 | -1.3791 |
| CEU | NPIP | 22373599 | 1.9031 | 3.4112 | -1.1845 |
| CEU | NPIP | 22378599 | 2.4232 | 3.5818 | -0.8732 |
| CEU | NPIP | 22383599 | 1.7137 | 2.8996 | -1.0665 |
| CEU | NPIP | 22388599 | 1.4026 | 3.7524 | -1.7024 |
| CEU | NPIP | 22393599 | 1.7328 | 4.7757 | -1.7897 |
| CEU | NPIP | 22398599 | 1.2723 | 4.7757 | -2.0605 |
| CEU | NPIP | 22403599 | 2.0095 | 5.1169 | -1.72   |
| CEU | NPIP | 22408599 | 1.8011 | 4.2641 | -1.5988 |
| CEU | NPIP | 22413599 | 0.9384 | 3.9229 | -2.0816 |
| CEU | NPIP | 22418599 | 1.0066 | 4.7757 | -2.2168 |
| CEU | NPIP | 22423599 | 1.1958 | 5.2874 | -2.2001 |
| CEU | NPIP | 22428599 | 0.9518 | 4.7757 | -2.249  |
| CEU | NPIP | 22433599 | 1.6388 | 4.9463 | -1.8863 |
| CEU | NPIP | 22438599 | 2.0289 | 4.4346 | -1.5094 |
| CEU | NPIP | 22443599 | 0.9893 | 2.5584 | -1.5631 |
| CEU | NPIP | 22448599 | 0.4999 | 1.1939 | -1.2367 |
| CEU | NPIP | 22453599 | 0.2995 | 0.3411 | -0.1668 |
| CEU | NPIP | 22458599 | 0.1616 | 0.5117 | -1.098  |
| CEU | NPIP | 22463599 | 0.0897 | 0.6822 | -1.5472 |
| CEU | NPIP | 22468599 | 0.1843 | 0.5117 | -1.0268 |
| CEU | NPIP | 22473599 | 0.2698 | 0.8528 | -1.3129 |
| CEU | NPIP | 22478599 | 0.155  | 0.6822 | -1.3767 |
| CEU | NPIP | 22483599 | 0.2942 | 1.0234 | -1.449  |
| CEU | NPIP | 22488599 | 0.7767 | 1.5351 | -1.1246 |
| CEU | NPIP | 22493599 | 0.4826 | 0.5117 | -0.0913 |
| CEU | NPIP | 22498599 | 0.0684 | 0.3411 | -1.0932 |
| CEU | NPIP | 22503599 | 0.0684 | 0.3411 | -1.0932 |
| CEU | NPIP | 22508599 | 0.0101 | 0.1706 | -0.9534 |
| CEU | NPIP | 22513599 | 0.1148 | 0.3411 | -0.9072 |
| CEU | NPIP | 22518599 | 0.1047 | 0.1706 | -0.3915 |
| CEU | NPIP | 22523599 | 0      | 0.3411 | -1.3674 |
| CEU | NPIP | 22528599 | 0.0202 | 0.6822 | -1.7287 |
| CEU | NPIP | 22533599 | 0.1616 | 0.5117 | -1.098  |
| CEU | NPIP | 22538599 | 0.3226 | 0.5117 | -0.5931 |
| CEU | NPIP | 22543599 | 0.2311 | 0.6822 | -1.178  |
| CEU | NPIP | 22548599 | 0.2002 | 2.0467 | -2.1971 |

## 2\_TajimasD\_data

|     |      |          |         |         |         |
|-----|------|----------|---------|---------|---------|
| CEU | NPIP | 22553599 | 1.235   | 5.2874  | -2.179  |
| CEU | NPIP | 22558599 | 1.9812  | 7.6753  | -2.1887 |
| CEU | NPIP | 22563599 | 1.0767  | 5.7991  | -2.339  |
| CEU | NPIP | 22568599 | 0.1802  | 1.7056  | -2.0892 |
| CEU | NPIP | 22573599 | 0.1189  | 0.6822  | -1.4709 |
| CEU | NPIP | 22578599 | 1.2432  | 2.3879  | -1.2055 |
| CEU | NPIP | 22583599 | 2.1884  | 5.2874  | -1.6663 |
| CEU | NPIP | 22588599 | 1.7831  | 6.1402  | -2.0503 |
| CEU | NPIP | 22593599 | 1.5706  | 5.7991  | -2.0943 |
| CEU | NPIP | 22598599 | 2.1433  | 6.6519  | -1.974  |
| CEU | NPIP | 22603599 | 1.7881  | 3.5818  | -1.3519 |
| CEU | NPIP | 22608599 | 1.3966  | 1.7056  | -0.4232 |
| CEU | NPIP | 22613599 | 1.2402  | 2.0467  | -0.9596 |
| CEU | NPIP | 22618599 | 1.0239  | 4.2641  | -2.1034 |
| CEU | NPIP | 22623599 | 1.4356  | 7.3342  | -2.3634 |
| CEU | NPIP | 22628599 | 1.9833  | 6.8225  | -2.0707 |
| CEU | NPIP | 22633599 | 4.3106  | 7.8459  | -1.3318 |
| CEU | NPIP | 22638599 | 5.5142  | 8.5281  | -1.0516 |
| CEU | NPIP | 22643599 | 5.073   | 8.6987  | -1.2421 |
| CEU | NPIP | 22648599 | 5.853   | 8.3576  | -0.8903 |
| CEU | NPIP | 22653599 | 7.4094  | 7.8459  | -0.1644 |
| CEU | NPIP | 22658599 | 6.8182  | 8.187   | -0.4959 |
| CEU | NPIP | 22663599 | 5.1455  | 8.0164  | -1.0604 |
| CEU | NPIP | 22668599 | 4.0058  | 6.4814  | -1.1096 |
| CEU | NPIP | 22673599 | 3.8141  | 5.1169  | -0.7211 |
| CEU | NPIP | 22678599 | 4.073   | 6.6519  | -1.1291 |
| CEU | NPIP | 22683599 | 3.0216  | 6.6519  | -1.5894 |
| CEU | NPIP | 22688599 | 2.4482  | 5.7991  | -1.6597 |
| CEU | NPIP | 22693599 | 3.6174  | 8.8692  | -1.7672 |
| CEU | NPIP | 22698599 | 4.8116  | 9.3809  | -1.4597 |
| CEU | NPIP | 22703599 | 3.6337  | 6.1402  | -1.1795 |
| CEU | NPIP | 22708599 | 2.939   | 5.2874  | -1.2627 |
| CEU | NPIP | 22713599 | 3.8435  | 6.6519  | -1.2296 |
| CEU | NPIP | 22718599 | 5.6832  | 7.8459  | -0.8147 |
| CEU | NPIP | 22723599 | 7.133   | 8.5281  | -0.4868 |
| CEU | NPIP | 22728599 | 13.0616 | 10.0632 | 0.8973  |
| CEU | NPIP | 22733599 | 15.9641 | 10.5749 | 1.5398  |
| CEU | NPIP | 22738599 | 8.1152  | 7.3342  | 0.3129  |
| CEU | NPIP | 22743599 | 5.0703  | 6.1402  | -0.5035 |
| CEU | NPIP | 22748599 | 5.1319  | 6.6519  | -0.6655 |
| CEU | NPIP | 22753599 | 4.4702  | 7.1636  | -1.1025 |
| CEU | NPIP | 22758599 | 6.2593  | 8.8692  | -0.8782 |
| CEU | NPIP | 22763599 | 5.9876  | 8.187   | -0.7968 |
| CEU | NPIP | 22768599 | 7.1216  | 7.3342  | -0.0852 |
| CEU | NPIP | 22773599 | 7.7724  | 6.6519  | 0.4906  |
| CEU | NPIP | 22778599 | 5.5077  | 5.6286  | -0.0615 |
| CEU | NPIP | 22783599 | 5.3694  | 6.4814  | -0.4984 |
| CEU | NPIP | 22788599 | 8.5925  | 8.5281  | 0.0225  |
| CEU | NPIP | 22793599 | 9.8277  | 8.3576  | 0.5226  |

## 2\_TajimasD\_data

|     |      |          |         |         |         |
|-----|------|----------|---------|---------|---------|
| CEU | NPIP | 22798599 | 9.699   | 8.5281  | 0.4085  |
| CEU | NPIP | 22803599 | 13.5683 | 9.5515  | 1.2619  |
| CEU | NPIP | 22808599 | 13.1206 | 9.2104  | 1.2706  |
| CEU | NPIP | 22813599 | 7.1915  | 7.5047  | -0.1229 |
| CEU | NPIP | 22818599 | 7.0542  | 7.5047  | -0.1768 |
| CEU | NPIP | 22823599 | 8.8062  | 8.187   | 0.2243  |
| CEU | NPIP | 22828599 | 6.5088  | 6.1402  | 0.1735  |
| CEU | NPIP | 22833599 | 15.1154 | 11.9394 | 0.8097  |
| CEU | NPIP | 22838599 | 18.0104 | 14.1567 | 0.8363  |
| CEU | NPIP | 22843599 | 12.1038 | 9.5515  | 0.8018  |
| CEU | NPIP | 22848599 | 10.122  | 8.5281  | 0.5561  |
| CEU | NPIP | 22853599 | 8.831   | 8.0164  | 0.3009  |
| CEU | NPIP | 22858599 | 8.2962  | 7.8459  | 0.1696  |
| CEU | NPIP | 22863599 | 5.7374  | 7.1636  | -0.5838 |
| CEU | NPIP | 22868599 | 8.6533  | 9.0398  | -0.1278 |
| CEU | NPIP | 22873599 | 9.6564  | 11.2571 | -0.4313 |
| CEU | NPIP | 22878599 | 5.7588  | 8.6987  | -1.0072 |
| CEU | NPIP | 22883599 | 5.4888  | 7.5047  | -0.7909 |
| CEU | NPIP | 22888599 | 7.032   | 8.8692  | -0.6182 |
| CEU | NPIP | 22893599 | 6.9064  | 7.5047  | -0.2347 |
| CEU | NPIP | 22898599 | 9.2391  | 6.9931  | 0.9398  |
| CEU | NPIP | 22903599 | 9.3203  | 6.6519  | 1.1683  |
| CEU | NPIP | 22908599 | 5.5114  | 5.2874  | 0.1204  |
| CEU | NPIP | 22913599 | 6.3609  | 5.458   | 0.472   |
| CEU | NPIP | 22918599 | 7.628   | 6.6519  | 0.4274  |
| CEU | NPIP | 22923599 | 7.4185  | 8.8692  | -0.4882 |
| CEU | NPIP | 22928599 | 9.7471  | 11.7688 | -0.5225 |
| CEU | NPIP | 22933599 | 14.2305 | 14.6684 | -0.0919 |
| CEU | NPIP | 22938599 | 12.8382 | 12.6216 | 0.0524  |
| CEU | NPIP | 22943599 | 10.7306 | 10.916  | -0.0514 |
| CEU | NPIP | 22948599 | 14.1847 | 13.4744 | 0.1615  |
| CEU | NPIP | 22953599 | 10.4572 | 10.2337 | 0.0658  |
| CEU | NPIP | 22958599 | 11.0759 | 10.0632 | 0.3031  |
| CEU | NPIP | 22963599 | 11.8609 | 10.7454 | 0.314   |
| CEU | NPIP | 22968599 | 11.4985 | 9.2104  | 0.7435  |
| CEU | NPIP | 22973599 | 11.8561 | 9.0398  | 0.9311  |
| CEU | NPIP | 22978599 | 9.8503  | 8.5281  | 0.4613  |
| CEU | NPIP | 22983599 | 13.1752 | 10.0632 | 0.9313  |
| CEU | NPIP | 22988599 | 13.5238 | 10.5749 | 0.8426  |
| CEU | NPIP | 22993599 | 10.7343 | 9.3809  | 0.4324  |
| CEU | NPIP | 22998599 | 7.1727  | 7.8459  | -0.2536 |
| CEU | NPIP | 23003599 | 5.5279  | 7.1636  | -0.6696 |
| CEU | NPIP | 23008599 | 17.0219 | 12.4511 | 1.1201  |
| CEU | NPIP | 23013599 | 24.9375 | 14.4978 | 2.2148  |
| CEU | NPIP | 23018599 | 18.6865 | 11.0866 | 2.0774  |
| CEU | NPIP | 23023599 | 18.1212 | 13.3039 | 1.1089  |
| CEU | NPIP | 23028599 | 12.572  | 10.916  | 0.4593  |
| CHB | NPIP | 22008599 | 2.2237  | 5.2519  | -1.6332 |
| CHB | NPIP | 22013599 | 3.8945  | 4.913   | -0.5826 |

## 2\_TajimasD\_data

|     |      |          |         |        |         |
|-----|------|----------|---------|--------|---------|
| CHB | NPIP | 22018599 | 3.9783  | 4.066  | -0.0591 |
| CHB | NPIP | 22023599 | 3.5248  | 4.4048 | -0.5537 |
| CHB | NPIP | 22028599 | 2.3581  | 4.066  | -1.1517 |
| CHB | NPIP | 22033599 | 2.9966  | 3.8965 | -0.6294 |
| CHB | NPIP | 22038599 | 3.0887  | 3.5577 | -0.3544 |
| CHB | NPIP | 22043599 | 1.8062  | 3.0495 | -1.0692 |
| CHB | NPIP | 22048599 | 1.9547  | 3.0495 | -0.9415 |
| CHB | NPIP | 22053599 | 2.2296  | 3.7271 | -1.0879 |
| CHB | NPIP | 22058599 | 3.999   | 5.4213 | -0.7458 |
| CHB | NPIP | 22063599 | 4.7426  | 5.2519 | -0.2747 |
| CHB | NPIP | 22068599 | 4.02    | 4.913  | -0.5108 |
| CHB | NPIP | 22073599 | 3.3876  | 4.913  | -0.8725 |
| CHB | NPIP | 22078599 | 2.9834  | 4.4048 | -0.8944 |
| CHB | NPIP | 22083599 | 3.4586  | 4.913  | -0.8319 |
| CHB | NPIP | 22088599 | 2.9151  | 4.7436 | -1.0786 |
| CHB | NPIP | 22093599 | 1.81    | 3.2189 | -1.1583 |
| CHB | NPIP | 22098599 | 0.7192  | 2.3718 | -1.7444 |
| CHB | NPIP | 22103599 | 2.4019  | 4.2354 | -1.1936 |
| CHB | NPIP | 22108599 | 2.8565  | 3.8965 | -0.7274 |
| CHB | NPIP | 22113599 | 1.9661  | 4.913  | -1.6856 |
| CHB | NPIP | 22118599 | 2.4767  | 6.946  | -1.876  |
| CHB | NPIP | 22123599 | 3.9551  | 6.4378 | -1.1163 |
| CHB | NPIP | 22128599 | 4.8068  | 6.6072 | -0.7908 |
| CHB | NPIP | 22133599 | 5.8935  | 7.6237 | -0.6672 |
| CHB | NPIP | 22138599 | 7.4202  | 8.6402 | -0.4194 |
| CHB | NPIP | 22143599 | 6.7001  | 7.6237 | -0.3562 |
| CHB | NPIP | 22148599 | 3.9517  | 5.9295 | -0.9575 |
| CHB | NPIP | 22153599 | 2.6094  | 5.7601 | -1.5653 |
| CHB | NPIP | 22158599 | 3.8441  | 6.4378 | -1.1662 |
| CHB | NPIP | 22163599 | 3.2861  | 6.4378 | -1.4171 |
| CHB | NPIP | 22168599 | 4.3309  | 6.946  | -1.0977 |
| CHB | NPIP | 22173599 | 4.0249  | 6.2684 | -1.0333 |
| CHB | NPIP | 22178599 | 2.4331  | 6.2684 | -1.7664 |
| CHB | NPIP | 22183599 | 4.2836  | 7.6237 | -1.288  |
| CHB | NPIP | 22188599 | 4.9507  | 7.7931 | -1.0743 |
| CHB | NPIP | 22193599 | 4.8003  | 7.6237 | -1.0888 |
| CHB | NPIP | 22198599 | 4.6811  | 7.9625 | -1.216  |
| CHB | NPIP | 22203599 | 6.6722  | 9.6567 | -0.9254 |
| CHB | NPIP | 22208599 | 7.6122  | 9.4872 | -0.591  |
| CHB | NPIP | 22213599 | 4.1416  | 7.1154 | -1.2213 |
| CHB | NPIP | 22218599 | 6.6493  | 7.7931 | -0.4323 |
| CHB | NPIP | 22223599 | 10.0133 | 8.4708 | 0.54    |
| CHB | NPIP | 22228599 | 9.0616  | 7.9625 | 0.4073  |
| CHB | NPIP | 22233599 | 9.4912  | 7.4543 | 0.8018  |
| CHB | NPIP | 22238599 | 10.0552 | 8.1319 | 0.6991  |
| CHB | NPIP | 22243599 | 7.7177  | 7.6237 | 0.0362  |
| CHB | NPIP | 22248599 | 5.8542  | 6.4378 | -0.2624 |
| CHB | NPIP | 22253599 | 6.028   | 7.7931 | -0.6671 |
| CHB | NPIP | 22258599 | 5.3857  | 6.7766 | -0.5971 |

## 2\_TajimasD\_data

|     |      |          |        |         |         |
|-----|------|----------|--------|---------|---------|
| CHB | NPIP | 22263599 | 4.2574 | 6.2684  | -0.9262 |
| CHB | NPIP | 22268599 | 2.9311 | 7.6237  | -1.8096 |
| CHB | NPIP | 22273599 | 2.4262 | 7.2848  | -1.953  |
| CHB | NPIP | 22278599 | 1.9052 | 7.4543  | -2.1843 |
| CHB | NPIP | 22283599 | 1.7377 | 7.6237  | -2.2698 |
| CHB | NPIP | 22288599 | 1.9844 | 6.7766  | -2.0571 |
| CHB | NPIP | 22293599 | 2.6718 | 6.7766  | -1.762  |
| CHB | NPIP | 22298599 | 5.234  | 8.4708  | -1.1331 |
| CHB | NPIP | 22303599 | 5.6539 | 10.5037 | -1.3904 |
| CHB | NPIP | 22308599 | 4.1354 | 10.8426 | -1.8666 |
| CHB | NPIP | 22313599 | 3.6806 | 8.6402  | -1.7048 |
| CHB | NPIP | 22318599 | 3.1239 | 6.2684  | -1.4482 |
| CHB | NPIP | 22323599 | 3.2286 | 6.2684  | -1.4    |
| CHB | NPIP | 22328599 | 3.8768 | 7.2848  | -1.3699 |
| CHB | NPIP | 22333599 | 3.9615 | 7.7931  | -1.4481 |
| CHB | NPIP | 22338599 | 4.5207 | 7.9625  | -1.2754 |
| CHB | NPIP | 22343599 | 4.1138 | 6.946   | -1.1888 |
| CHB | NPIP | 22348599 | 2.6659 | 5.7601  | -1.5373 |
| CHB | NPIP | 22353599 | 2.5071 | 5.5907  | -1.5733 |
| CHB | NPIP | 22358599 | 1.5783 | 4.2354  | -1.7298 |
| CHB | NPIP | 22363599 | 0.6728 | 3.7271  | -2.2189 |
| CHB | NPIP | 22368599 | 1.3998 | 4.066   | -1.7979 |
| CHB | NPIP | 22373599 | 2.387  | 4.5742  | -1.3318 |
| CHB | NPIP | 22378599 | 2.4803 | 5.5907  | -1.587  |
| CHB | NPIP | 22383599 | 1.858  | 5.4213  | -1.8685 |
| CHB | NPIP | 22388599 | 2.2383 | 6.0989  | -1.8224 |
| CHB | NPIP | 22393599 | 2.7318 | 5.9295  | -1.5481 |
| CHB | NPIP | 22398599 | 1.7217 | 4.2354  | -1.6364 |
| CHB | NPIP | 22403599 | 3.2353 | 6.0989  | -1.3517 |
| CHB | NPIP | 22408599 | 3.7205 | 7.7931  | -1.5392 |
| CHB | NPIP | 22413599 | 2.261  | 6.946   | -1.9666 |
| CHB | NPIP | 22418599 | 2.9958 | 6.7766  | -1.623  |
| CHB | NPIP | 22423599 | 2.351  | 6.6072  | -1.8694 |
| CHB | NPIP | 22428599 | 1.4963 | 5.7601  | -2.1184 |
| CHB | NPIP | 22433599 | 2.9444 | 5.9295  | -1.4451 |
| CHB | NPIP | 22438599 | 3.5151 | 6.6072  | -1.3581 |
| CHB | NPIP | 22443599 | 2.1346 | 5.4213  | -1.7234 |
| CHB | NPIP | 22448599 | 0.8586 | 3.0495  | -1.8842 |
| CHB | NPIP | 22453599 | 0.4375 | 1.0165  | -1.1522 |
| CHB | NPIP | 22458599 | 0.4375 | 1.0165  | -1.1522 |
| CHB | NPIP | 22463599 | 0.1064 | 1.3553  | -2.0241 |
| CHB | NPIP | 22468599 | 0.4278 | 0.6777  | -0.6533 |
| CHB | NPIP | 22473599 | 1.0556 | 1.5247  | -0.6969 |
| CHB | NPIP | 22478599 | 0.6762 | 1.3553  | -1.1006 |
| CHB | NPIP | 22483599 | 0.186  | 1.0165  | -1.6527 |
| CHB | NPIP | 22488599 | 0.8441 | 1.6942  | -1.1667 |
| CHB | NPIP | 22493599 | 0.6775 | 0.8471  | -0.3824 |
| CHB | NPIP | 22498599 | 0.1038 | 0.5082  | -1.2695 |
| CHB | NPIP | 22503599 | 0.0843 | 0.3388  | -1.0209 |

## 2\_TajimasD\_data

|     |      |          |         |         |         |
|-----|------|----------|---------|---------|---------|
| CHB | NPIP | 22508599 | 0       | 0       | 0       |
| CHB | NPIP | 22513599 | 0.1609  | 0.1694  | -0.0505 |
| CHB | NPIP | 22518599 | 0.1609  | 0.1694  | -0.0505 |
| CHB | NPIP | 22523599 | 0       | 0.3388  | -1.359  |
| CHB | NPIP | 22528599 | 0.048   | 0.6777  | -1.6462 |
| CHB | NPIP | 22533599 | 0.0577  | 0.5082  | -1.4142 |
| CHB | NPIP | 22538599 | 0.2088  | 0.5082  | -0.9399 |
| CHB | NPIP | 22543599 | 0.5016  | 1.1859  | -1.2215 |
| CHB | NPIP | 22548599 | 0.7139  | 2.7106  | -1.892  |
| CHB | NPIP | 22553599 | 3.0278  | 4.913   | -1.0783 |
| CHB | NPIP | 22558599 | 5.1279  | 8.6402  | -1.2073 |
| CHB | NPIP | 22563599 | 3.5197  | 7.4543  | -1.5488 |
| CHB | NPIP | 22568599 | 1.0276  | 2.2024  | -1.3155 |
| CHB | NPIP | 22573599 | 0.0874  | 1.3553  | -2.0549 |
| CHB | NPIP | 22578599 | 1.633   | 3.0495  | -1.2182 |
| CHB | NPIP | 22583599 | 4.3484  | 6.4378  | -0.9395 |
| CHB | NPIP | 22588599 | 3.6636  | 6.6072  | -1.2929 |
| CHB | NPIP | 22593599 | 1.8757  | 4.5742  | -1.6432 |
| CHB | NPIP | 22598599 | 3.222   | 7.7931  | -1.7276 |
| CHB | NPIP | 22603599 | 2.7371  | 5.7601  | -1.5019 |
| CHB | NPIP | 22608599 | 1.8666  | 2.033   | -0.1984 |
| CHB | NPIP | 22613599 | 1.4335  | 2.5412  | -1.1061 |
| CHB | NPIP | 22618599 | 1.8021  | 2.7106  | -0.8609 |
| CHB | NPIP | 22623599 | 4.5948  | 6.2684  | -0.7708 |
| CHB | NPIP | 22628599 | 6.3366  | 9.1484  | -0.9168 |
| CHB | NPIP | 22633599 | 7.2161  | 10.3343 | -0.9077 |
| CHB | NPIP | 22638599 | 5.202   | 8.3013  | -1.1054 |
| CHB | NPIP | 22643599 | 4.9625  | 7.4543  | -0.9808 |
| CHB | NPIP | 22648599 | 6.5492  | 7.6237  | -0.4144 |
| CHB | NPIP | 22653599 | 7.3415  | 7.9625  | -0.2301 |
| CHB | NPIP | 22658599 | 8.0051  | 10.3343 | -0.678  |
| CHB | NPIP | 22663599 | 6.1673  | 10.5037 | -1.2432 |
| CHB | NPIP | 22668599 | 3.9844  | 9.4872  | -1.7346 |
| CHB | NPIP | 22673599 | 5.011   | 8.3013  | -1.1735 |
| CHB | NPIP | 22678599 | 5.8567  | 8.979   | -1.0358 |
| CHB | NPIP | 22683599 | 4.5069  | 8.1319  | -1.3176 |
| CHB | NPIP | 22688599 | 3.8016  | 7.2848  | -1.4001 |
| CHB | NPIP | 22693599 | 4.2977  | 7.7931  | -1.3211 |
| CHB | NPIP | 22698599 | 5.6044  | 7.9625  | -0.8738 |
| CHB | NPIP | 22703599 | 4.5664  | 7.9625  | -1.2585 |
| CHB | NPIP | 22708599 | 4.0357  | 8.1319  | -1.4889 |
| CHB | NPIP | 22713599 | 4.9271  | 7.9625  | -1.1248 |
| CHB | NPIP | 22718599 | 5.6221  | 6.946   | -0.5557 |
| CHB | NPIP | 22723599 | 7.6284  | 9.8261  | -0.6705 |
| CHB | NPIP | 22728599 | 15.3695 | 14.7391 | 0.1313  |
| CHB | NPIP | 22733599 | 18.261  | 15.925  | 0.4519  |
| CHB | NPIP | 22738599 | 8.8936  | 11.3508 | -0.6551 |
| CHB | NPIP | 22743599 | 5.1467  | 9.3178  | -1.337  |
| CHB | NPIP | 22748599 | 5.7397  | 11.012  | -1.4461 |



## 2\_TajimasD\_data

|     |      |          |         |         |         |
|-----|------|----------|---------|---------|---------|
| CHB | NPIP | 22753599 | 5.1664  | 11.1814 | -1.6264 |
| CHB | NPIP | 22758599 | 6.1125  | 8.6402  | -0.8689 |
| CHB | NPIP | 22763599 | 4.9225  | 6.0989  | -0.5553 |
| CHB | NPIP | 22768599 | 5.3895  | 8.1319  | -0.9968 |
| CHB | NPIP | 22773599 | 5.4761  | 7.7931  | -0.8757 |
| CHB | NPIP | 22778599 | 4.015   | 6.2684  | -1.0378 |
| CHB | NPIP | 22783599 | 4.2003  | 6.7766  | -1.1059 |
| CHB | NPIP | 22788599 | 6.9406  | 8.1319  | -0.433  |
| CHB | NPIP | 22793599 | 8.7314  | 10.5037 | -0.5081 |
| CHB | NPIP | 22798599 | 9.348   | 12.3673 | -0.7425 |
| CHB | NPIP | 22803599 | 13.5351 | 12.3673 | 0.2872  |
| CHB | NPIP | 22808599 | 13.0169 | 9.8261  | 0.9735  |
| CHB | NPIP | 22813599 | 7.6113  | 8.8096  | -0.4046 |
| CHB | NPIP | 22818599 | 7.6236  | 10.8426 | -0.8959 |
| CHB | NPIP | 22823599 | 8.7221  | 11.6896 | -0.7696 |
| CHB | NPIP | 22828599 | 6.1725  | 8.8096  | -0.8904 |
| CHB | NPIP | 22833599 | 14.8578 | 12.5367 | 0.5635  |
| CHB | NPIP | 22838599 | 18.8908 | 15.4168 | 0.6931  |
| CHB | NPIP | 22843599 | 13.4564 | 11.8591 | 0.4087  |
| CHB | NPIP | 22848599 | 10.7655 | 11.5202 | -0.1984 |
| CHB | NPIP | 22853599 | 10.2701 | 12.3673 | -0.5157 |
| CHB | NPIP | 22858599 | 10.32   | 12.0285 | -0.4313 |
| CHB | NPIP | 22863599 | 7.7131  | 10.3343 | -0.763  |
| CHB | NPIP | 22868599 | 11.3695 | 12.0285 | -0.1664 |
| CHB | NPIP | 22873599 | 13.799  | 13.7226 | 0.017   |
| CHB | NPIP | 22878599 | 10.8679 | 12.0285 | -0.293  |
| CHB | NPIP | 22883599 | 10.2334 | 11.6896 | -0.3776 |
| CHB | NPIP | 22888599 | 9.5243  | 10.8426 | -0.3669 |
| CHB | NPIP | 22893599 | 7.4342  | 7.9625  | -0.1958 |
| CHB | NPIP | 22898599 | 10.0982 | 8.1319  | 0.7147  |
| CHB | NPIP | 22903599 | 8.8822  | 7.6237  | 0.4853  |
| CHB | NPIP | 22908599 | 4.5517  | 6.0989  | -0.7303 |
| CHB | NPIP | 22913599 | 6.3065  | 6.6072  | -0.1321 |
| CHB | NPIP | 22918599 | 8.0524  | 8.1319  | -0.0289 |
| CHB | NPIP | 22923599 | 7.6208  | 9.9955  | -0.7131 |
| CHB | NPIP | 22928599 | 12.5985 | 13.045  | -0.1044 |
| CHB | NPIP | 22933599 | 18.1443 | 15.0779 | 0.6249  |
| CHB | NPIP | 22938599 | 13.1776 | 13.2144 | -0.0085 |
| CHB | NPIP | 22943599 | 9.9989  | 12.3673 | -0.5824 |
| CHB | NPIP | 22948599 | 12.8976 | 13.045  | -0.0345 |
| CHB | NPIP | 22953599 | 9.2393  | 11.1814 | -0.5251 |
| CHB | NPIP | 22958599 | 11.6136 | 13.3838 | -0.404  |
| CHB | NPIP | 22963599 | 16.8344 | 17.2803 | -0.0798 |
| CHB | NPIP | 22968599 | 17.2951 | 17.7886 | -0.0859 |
| CHB | NPIP | 22973599 | 16.0194 | 18.4662 | -0.4107 |
| CHB | NPIP | 22978599 | 12.7714 | 16.4333 | -0.6874 |
| CHB | NPIP | 22983599 | 13.8576 | 13.2144 | 0.1486  |
| CHB | NPIP | 22988599 | 14.213  | 13.3838 | 0.1892  |
| CHB | NPIP | 22993599 | 11.8555 | 12.8755 | -0.2415 |

## 2\_TajimasD\_data

|     |      |          |         |         |         |
|-----|------|----------|---------|---------|---------|
| CHB | NPIP | 22998599 | 8.9989  | 11.3508 | -0.627  |
| CHB | NPIP | 23003599 | 6.5106  | 9.6567  | -0.9755 |
| CHB | NPIP | 23008599 | 14.5686 | 10.8426 | 1.037   |
| CHB | NPIP | 23013599 | 20.6439 | 12.8755 | 1.8391  |
| CHB | NPIP | 23018599 | 18.8733 | 11.012  | 2.1563  |
| CHB | NPIP | 23023599 | 19.5446 | 12.3673 | 1.7651  |
| CHB | NPIP | 23028599 | 11.9604 | 11.1814 | 0.2106  |
| YRI | NPIP | 22008599 | 2.7175  | 5.2099  | -1.3491 |
| YRI | NPIP | 22013599 | 4.2615  | 7.3947  | -1.2381 |
| YRI | NPIP | 22018599 | 4.4146  | 7.5628  | -1.2188 |
| YRI | NPIP | 22023599 | 3.0407  | 6.7225  | -1.5865 |
| YRI | NPIP | 22028599 | 2.5663  | 6.5544  | -1.7583 |
| YRI | NPIP | 22033599 | 4.266   | 7.2267  | -1.1947 |
| YRI | NPIP | 22038599 | 3.3782  | 6.0502  | -1.266  |
| YRI | NPIP | 22043599 | 3.0893  | 6.0502  | -1.4029 |
| YRI | NPIP | 22048599 | 3.4098  | 6.8906  | -1.4667 |
| YRI | NPIP | 22053599 | 3.0744  | 7.2267  | -1.6755 |
| YRI | NPIP | 22058599 | 3.5031  | 7.2267  | -1.5025 |
| YRI | NPIP | 22063599 | 3.2438  | 5.5461  | -1.179  |
| YRI | NPIP | 22068599 | 2.9575  | 5.378   | -1.2739 |
| YRI | NPIP | 22073599 | 1.9171  | 4.5377  | -1.6013 |
| YRI | NPIP | 22078599 | 2.7013  | 4.2016  | -0.98   |
| YRI | NPIP | 22083599 | 3.5227  | 5.2099  | -0.9132 |
| YRI | NPIP | 22088599 | 2.4799  | 6.5544  | -1.7964 |
| YRI | NPIP | 22093599 | 1.7249  | 6.5544  | -2.1292 |
| YRI | NPIP | 22098599 | 1.9026  | 5.2099  | -1.7902 |
| YRI | NPIP | 22103599 | 3.6347  | 6.5544  | -1.2872 |
| YRI | NPIP | 22108599 | 3.3423  | 6.5544  | -1.4161 |
| YRI | NPIP | 22113599 | 2.3796  | 6.7225  | -1.8714 |
| YRI | NPIP | 22118599 | 2.6196  | 7.8989  | -1.964  |
| YRI | NPIP | 22123599 | 4.5225  | 7.5628  | -1.177  |
| YRI | NPIP | 22128599 | 4.6409  | 6.7225  | -0.897  |
| YRI | NPIP | 22133599 | 5.356   | 8.7392  | -1.1468 |
| YRI | NPIP | 22138599 | 6.2934  | 9.9157  | -1.0921 |
| YRI | NPIP | 22143599 | 4.7981  | 7.5628  | -1.0703 |
| YRI | NPIP | 22148599 | 4.4383  | 6.3864  | -0.8792 |
| YRI | NPIP | 22153599 | 4.0884  | 6.8906  | -1.1808 |
| YRI | NPIP | 22158599 | 3.7332  | 8.7392  | -1.6969 |
| YRI | NPIP | 22163599 | 3.0081  | 9.4115  | -2.0266 |
| YRI | NPIP | 22168599 | 4.9047  | 9.7476  | -1.4836 |
| YRI | NPIP | 22173599 | 5.6922  | 11.0921 | -1.4661 |
| YRI | NPIP | 22178599 | 3.7458  | 8.5712  | -1.6653 |
| YRI | NPIP | 22183599 | 5.6805  | 6.7225  | -0.449  |
| YRI | NPIP | 22188599 | 7.6908  | 9.9157  | -0.6708 |
| YRI | NPIP | 22193599 | 6.7962  | 9.5795  | -0.8665 |
| YRI | NPIP | 22198599 | 6.4388  | 8.4031  | -0.6904 |
| YRI | NPIP | 22203599 | 9.1391  | 10.0837 | -0.2804 |
| YRI | NPIP | 22208599 | 9.7804  | 11.0921 | -0.3561 |
| YRI | NPIP | 22213599 | 5.9153  | 8.4031  | -0.8744 |

## 2\_TajimasD\_data

|     |      |          |         |         |         |
|-----|------|----------|---------|---------|---------|
| YRI | NPIP | 22218599 | 6.8834  | 8.4031  | -0.5341 |
| YRI | NPIP | 22223599 | 8.5526  | 10.5879 | -0.5772 |
| YRI | NPIP | 22228599 | 8.7643  | 10.5879 | -0.5172 |
| YRI | NPIP | 22233599 | 10.4559 | 10.2518 | 0.0597  |
| YRI | NPIP | 22238599 | 9.6177  | 9.4115  | 0.0653  |
| YRI | NPIP | 22243599 | 7.8952  | 10.0837 | -0.6496 |
| YRI | NPIP | 22248599 | 8.7329  | 11.0921 | -0.6405 |
| YRI | NPIP | 22253599 | 8.765   | 10.924  | -0.5946 |
| YRI | NPIP | 22258599 | 8.1199  | 10.5879 | -0.6999 |
| YRI | NPIP | 22263599 | 7.9146  | 8.7392  | -0.2795 |
| YRI | NPIP | 22268599 | 6.1793  | 8.235   | -0.7361 |
| YRI | NPIP | 22273599 | 6.9474  | 9.9157  | -0.8949 |
| YRI | NPIP | 22278599 | 9.2361  | 9.7476  | -0.1567 |
| YRI | NPIP | 22283599 | 9.7424  | 9.7476  | -0.0016 |
| YRI | NPIP | 22288599 | 7.3928  | 8.7392  | -0.4564 |
| YRI | NPIP | 22293599 | 7.989   | 9.9157  | -0.5809 |
| YRI | NPIP | 22298599 | 12.9056 | 14.1172 | -0.262  |
| YRI | NPIP | 22303599 | 10.6931 | 13.7811 | -0.6832 |
| YRI | NPIP | 22308599 | 8.8192  | 11.0921 | -0.6171 |
| YRI | NPIP | 22313599 | 8.6532  | 9.9157  | -0.3806 |
| YRI | NPIP | 22318599 | 4.9724  | 8.7392  | -1.2768 |
| YRI | NPIP | 22323599 | 4.6826  | 9.5795  | -1.5246 |
| YRI | NPIP | 22328599 | 5.0706  | 10.4199 | -1.5399 |
| YRI | NPIP | 22333599 | 5.3216  | 9.9157  | -1.3851 |
| YRI | NPIP | 22338599 | 5.3896  | 11.5963 | -1.6163 |
| YRI | NPIP | 22343599 | 4.0347  | 10.756  | -1.8782 |
| YRI | NPIP | 22348599 | 3.4672  | 7.5628  | -1.5855 |
| YRI | NPIP | 22353599 | 3.419   | 6.2183  | -1.2941 |
| YRI | NPIP | 22358599 | 2.773   | 5.2099  | -1.319  |
| YRI | NPIP | 22363599 | 1.4007  | 4.8738  | -1.9937 |
| YRI | NPIP | 22368599 | 2.4154  | 6.8906  | -1.8857 |
| YRI | NPIP | 22373599 | 3.3445  | 7.5628  | -1.633  |
| YRI | NPIP | 22378599 | 2.7118  | 6.8906  | -1.7608 |
| YRI | NPIP | 22383599 | 3.2236  | 6.8906  | -1.5452 |
| YRI | NPIP | 22388599 | 4.1332  | 6.7225  | -1.1157 |
| YRI | NPIP | 22393599 | 3.8217  | 6.8906  | -1.2931 |
| YRI | NPIP | 22398599 | 2.5281  | 6.2183  | -1.706  |
| YRI | NPIP | 22403599 | 4.6842  | 7.2267  | -1.0259 |
| YRI | NPIP | 22408599 | 5.701   | 8.4031  | -0.9497 |
| YRI | NPIP | 22413599 | 3.0563  | 9.0754  | -1.9703 |
| YRI | NPIP | 22418599 | 3.3804  | 8.5712  | -1.7914 |
| YRI | NPIP | 22423599 | 4.2574  | 8.5712  | -1.4887 |
| YRI | NPIP | 22428599 | 2.9949  | 8.067   | -1.8508 |
| YRI | NPIP | 22433599 | 3.121   | 8.067   | -1.8048 |
| YRI | NPIP | 22438599 | 2.8048  | 8.9073  | -2.0325 |
| YRI | NPIP | 22443599 | 1.4778  | 6.0502  | -2.1664 |
| YRI | NPIP | 22448599 | 0.7241  | 3.0251  | -1.985  |
| YRI | NPIP | 22453599 | 0.3841  | 1.1764  | -1.4171 |
| YRI | NPIP | 22458599 | 0.4604  | 0.8403  | -0.8581 |

## 2\_TajimasD\_data

|     |      |          |        |         |         |
|-----|------|----------|--------|---------|---------|
| YRI | NPIP | 22463599 | 0.1409 | 0.6722  | -1.3909 |
| YRI | NPIP | 22468599 | 0.1255 | 0.5042  | -1.1901 |
| YRI | NPIP | 22473599 | 0.3956 | 1.8487  | -1.8586 |
| YRI | NPIP | 22478599 | 0.343  | 1.8487  | -1.9259 |
| YRI | NPIP | 22483599 | 0.5154 | 1.3445  | -1.3466 |
| YRI | NPIP | 22488599 | 0.948  | 2.1848  | -1.3887 |
| YRI | NPIP | 22493599 | 0.4962 | 1.1764  | -1.2166 |
| YRI | NPIP | 22498599 | 0.0365 | 0.5042  | -1.4698 |
| YRI | NPIP | 22503599 | 0.0365 | 0.5042  | -1.4698 |
| YRI | NPIP | 22508599 | 0      | 0       | 0       |
| YRI | NPIP | 22513599 | 0.0884 | 0.1681  | -0.4738 |
| YRI | NPIP | 22518599 | 0.0884 | 0.1681  | -0.4738 |
| YRI | NPIP | 22523599 | 0      | 0.3361  | -1.3493 |
| YRI | NPIP | 22528599 | 0.0093 | 0.6722  | -1.7354 |
| YRI | NPIP | 22533599 | 0.0093 | 0.3361  | -1.312  |
| YRI | NPIP | 22538599 | 0.5059 | 0.3361  | 0.6817  |
| YRI | NPIP | 22543599 | 1.3359 | 1.6806  | -0.4742 |
| YRI | NPIP | 22548599 | 1.096  | 4.0335  | -1.9875 |
| YRI | NPIP | 22553599 | 1.8336 | 8.4031  | -2.3089 |
| YRI | NPIP | 22558599 | 3.3846 | 12.1005 | -2.1805 |
| YRI | NPIP | 22563599 | 2.1222 | 8.4031  | -2.2075 |
| YRI | NPIP | 22568599 | 0.3963 | 2.3529  | -2.0712 |
| YRI | NPIP | 22573599 | 0.3226 | 1.5126  | -1.772  |
| YRI | NPIP | 22578599 | 1.5505 | 3.6974  | -1.5648 |
| YRI | NPIP | 22583599 | 3.0262 | 8.235   | -1.865  |
| YRI | NPIP | 22588599 | 2.3228 | 8.5712  | -2.1563 |
| YRI | NPIP | 22593599 | 1.8368 | 6.3864  | -2.0534 |
| YRI | NPIP | 22598599 | 3.548  | 9.0754  | -1.8094 |
| YRI | NPIP | 22603599 | 2.7773 | 6.3864  | -1.6289 |
| YRI | NPIP | 22608599 | 1.2741 | 2.1848  | -1.0225 |
| YRI | NPIP | 22613599 | 0.8606 | 2.0167  | -1.3823 |
| YRI | NPIP | 22618599 | 0.4573 | 4.0335  | -2.4197 |
| YRI | NPIP | 22623599 | 2.351  | 9.4115  | -2.2346 |
| YRI | NPIP | 22628599 | 4.7265 | 13.7811 | -2.0032 |
| YRI | NPIP | 22633599 | 7.4103 | 14.9575 | -1.5446 |
| YRI | NPIP | 22638599 | 6.7652 | 13.1089 | -1.4715 |
| YRI | NPIP | 22643599 | 5.477  | 10.924  | -1.5002 |
| YRI | NPIP | 22648599 | 6.6948 | 10.756  | -1.1349 |
| YRI | NPIP | 22653599 | 8.7134 | 13.2769 | -1.0459 |
| YRI | NPIP | 22658599 | 8.3247 | 14.2853 | -1.2744 |
| YRI | NPIP | 22663599 | 6.0763 | 12.2685 | -1.5292 |
| YRI | NPIP | 22668599 | 4.8939 | 11.2602 | -1.7043 |
| YRI | NPIP | 22673599 | 4.5157 | 11.2602 | -1.8055 |
| YRI | NPIP | 22678599 | 4.9396 | 10.5879 | -1.6018 |
| YRI | NPIP | 22683599 | 4.7489 | 10.0837 | -1.5835 |
| YRI | NPIP | 22688599 | 3.9834 | 10.0837 | -1.8107 |
| YRI | NPIP | 22693599 | 4.7477 | 11.9324 | -1.8213 |
| YRI | NPIP | 22698599 | 6.661  | 12.1005 | -1.3609 |
| YRI | NPIP | 22703599 | 6.2669 | 12.1005 | -1.4595 |

## 2\_TajimasD\_data

|     |      |          |         |         |         |
|-----|------|----------|---------|---------|---------|
| YRI | NPIP | 22708599 | 4.8466  | 11.4282 | -1.7376 |
| YRI | NPIP | 22713599 | 5.2646  | 7.8989  | -0.98   |
| YRI | NPIP | 22718599 | 6.8931  | 8.235   | -0.4805 |
| YRI | NPIP | 22723599 | 9.163   | 11.9324 | -0.702  |
| YRI | NPIP | 22728599 | 16.3083 | 18.3188 | -0.3389 |
| YRI | NPIP | 22733599 | 17.5352 | 18.823  | -0.2115 |
| YRI | NPIP | 22738599 | 9.3884  | 12.2685 | -0.7112 |
| YRI | NPIP | 22743599 | 8.7611  | 11.5963 | -0.7383 |
| YRI | NPIP | 22748599 | 10.6358 | 14.9575 | -0.8845 |
| YRI | NPIP | 22753599 | 10.0039 | 14.9575 | -1.0138 |
| YRI | NPIP | 22758599 | 9.6861  | 11.9324 | -0.5694 |
| YRI | NPIP | 22763599 | 7.4822  | 9.2434  | -0.5668 |
| YRI | NPIP | 22768599 | 8.2306  | 8.7392  | -0.1724 |
| YRI | NPIP | 22773599 | 8.0056  | 10.2518 | -0.6565 |
| YRI | NPIP | 22778599 | 5.6204  | 10.4199 | -1.3816 |
| YRI | NPIP | 22783599 | 5.4978  | 10.0837 | -1.3612 |
| YRI | NPIP | 22788599 | 8.9162  | 11.5963 | -0.6979 |
| YRI | NPIP | 22793599 | 9.6144  | 13.2769 | -0.8394 |
| YRI | NPIP | 22798599 | 7.5892  | 14.7895 | -1.4895 |
| YRI | NPIP | 22803599 | 12.5977 | 15.6298 | -0.5951 |
| YRI | NPIP | 22808599 | 13.9901 | 12.4366 | 0.3787  |
| YRI | NPIP | 22813599 | 9.8043  | 9.9157  | -0.0336 |
| YRI | NPIP | 22818599 | 9.6594  | 13.613  | -0.8849 |
| YRI | NPIP | 22823599 | 12.3435 | 15.7978 | -0.671  |
| YRI | NPIP | 22828599 | 11.936  | 12.9408 | -0.2359 |
| YRI | NPIP | 22833599 | 17.0693 | 16.4701 | 0.1119  |
| YRI | NPIP | 22838599 | 17.9302 | 18.1507 | -0.0375 |
| YRI | NPIP | 22843599 | 14.2571 | 14.9575 | -0.1433 |
| YRI | NPIP | 22848599 | 15.6719 | 16.302  | -0.1188 |
| YRI | NPIP | 22853599 | 14.7435 | 16.9743 | -0.4046 |
| YRI | NPIP | 22858599 | 13.2956 | 16.134  | -0.5404 |
| YRI | NPIP | 22863599 | 11.5296 | 15.7978 | -0.8292 |
| YRI | NPIP | 22868599 | 12.9245 | 15.9659 | -0.5849 |
| YRI | NPIP | 22873599 | 15.567  | 17.9827 | -0.4146 |
| YRI | NPIP | 22878599 | 12.1043 | 15.7978 | -0.7175 |
| YRI | NPIP | 22883599 | 9.3801  | 13.7811 | -0.9736 |
| YRI | NPIP | 22888599 | 11.0557 | 15.6298 | -0.8977 |
| YRI | NPIP | 22893599 | 9.0299  | 12.1005 | -0.7682 |
| YRI | NPIP | 22898599 | 8.7036  | 9.2434  | -0.1737 |
| YRI | NPIP | 22903599 | 7.9404  | 9.4115  | -0.4656 |
| YRI | NPIP | 22908599 | 5.387   | 8.5712  | -1.0989 |
| YRI | NPIP | 22913599 | 6.7908  | 9.7476  | -0.9058 |
| YRI | NPIP | 22918599 | 8.3737  | 11.7644 | -0.8711 |
| YRI | NPIP | 22923599 | 11.2571 | 11.9324 | -0.1712 |
| YRI | NPIP | 22928599 | 18.259  | 14.1172 | 0.8956  |
| YRI | NPIP | 22933599 | 24.3366 | 16.8062 | 1.3789  |
| YRI | NPIP | 22938599 | 19.3666 | 17.6465 | 0.3006  |
| YRI | NPIP | 22943599 | 13.5144 | 16.134  | -0.4988 |
| YRI | NPIP | 22948599 | 14.3236 | 14.9575 | -0.1297 |

## 2\_TajimasD\_data

|     |      |          |         |         |         |
|-----|------|----------|---------|---------|---------|
| YRI | NPIP | 22953599 | 10.9067 | 13.613  | -0.6057 |
| YRI | NPIP | 22958599 | 9.5731  | 15.1256 | -1.1243 |
| YRI | NPIP | 22963599 | 10.0504 | 19.8313 | -1.5278 |
| YRI | NPIP | 22968599 | 10.9395 | 21.512  | -1.5268 |
| YRI | NPIP | 22973599 | 11.2069 | 20.5036 | -1.4062 |
| YRI | NPIP | 22978599 | 9.0629  | 17.1423 | -1.4516 |
| YRI | NPIP | 22983599 | 9.5382  | 15.2937 | -1.1532 |
| YRI | NPIP | 22988599 | 11.6751 | 16.6382 | -0.9176 |
| YRI | NPIP | 22993599 | 10.788  | 16.134  | -1.0179 |
| YRI | NPIP | 22998599 | 8.2748  | 14.1172 | -1.2633 |
| YRI | NPIP | 23003599 | 6.0877  | 11.5963 | -1.4345 |
| YRI | NPIP | 23008599 | 11.1411 | 14.2853 | -0.6723 |
| YRI | NPIP | 23013599 | 14.1875 | 17.4785 | -0.5804 |
| YRI | NPIP | 23018599 | 8.2074  | 15.4617 | -1.4385 |
| YRI | NPIP | 23023599 | 8.7839  | 16.134  | -1.3994 |
| YRI | NPIP | 23028599 | 6.9063  | 12.1005 | -1.2995 |
| CEU | NPIP | 27847517 | 12.0019 | 8.187   | 1.3821  |
| CEU | NPIP | 27852517 | 18.9672 | 10.5749 | 2.3978  |
| CEU | NPIP | 27857517 | 17.4688 | 10.4043 | 2.0494  |
| CEU | NPIP | 27862517 | 9.5351  | 7.8459  | 0.6363  |
| CEU | NPIP | 27867517 | 6.536   | 6.1402  | 0.1863  |
| CEU | NPIP | 27872517 | 7.9973  | 6.3108  | 0.7743  |
| CEU | NPIP | 27877517 | 6.7155  | 6.9931  | -0.1162 |
| CEU | NPIP | 27882517 | 5.2272  | 7.1636  | -0.7927 |
| CEU | NPIP | 27887517 | 10.7421 | 8.8692  | 0.6302  |
| CEU | NPIP | 27892517 | 19.1991 | 12.6216 | 1.5913  |
| CEU | NPIP | 27897517 | 18.8769 | 14.1567 | 1.0243  |
| CEU | NPIP | 27902517 | 12.0994 | 12.2805 | -0.045  |
| CEU | NPIP | 27907517 | 9.7988  | 11.4277 | -0.4328 |
| CEU | NPIP | 27912517 | 9.4164  | 11.0866 | -0.4565 |
| CEU | NPIP | 27917517 | 8.6642  | 10.2337 | -0.4624 |
| CEU | NPIP | 27922517 | 10.8178 | 10.916  | -0.0272 |
| CEU | NPIP | 27927517 | 10.4071 | 10.7454 | -0.0952 |
| CEU | NPIP | 27932517 | 9.9336  | 9.2104  | 0.235   |
| CEU | NPIP | 27937517 | 12.657  | 10.2337 | 0.7139  |
| CEU | NPIP | 27942517 | 15.6019 | 11.9394 | 0.9338  |
| CEU | NPIP | 27947517 | 18.2902 | 13.645  | 1.0439  |
| CEU | NPIP | 27952517 | 15.4743 | 11.5982 | 1.0156  |
| CEU | NPIP | 27957517 | 11.8283 | 9.2104  | 0.8507  |
| CEU | NPIP | 27962517 | 11.5393 | 9.2104  | 0.7568  |
| CEU | NPIP | 27967517 | 11.4047 | 9.0398  | 0.7819  |
| CEU | NPIP | 27972517 | 12.075  | 9.0398  | 1.0035  |
| CEU | NPIP | 27977517 | 11.3239 | 7.1636  | 1.703   |
| CEU | NPIP | 27982517 | 9.4605  | 6.8225  | 1.1288  |
| CEU | NPIP | 27987517 | 12.9643 | 10.7454 | 0.6246  |
| CEU | NPIP | 27992517 | 14.0705 | 10.0632 | 1.1992  |
| CEU | NPIP | 27997517 | 11.7481 | 8.0164  | 1.3783  |
| CEU | NPIP | 28002517 | 13.7532 | 10.4043 | 0.9715  |
| CEU | NPIP | 28007517 | 10.8312 | 8.5281  | 0.8036  |

## 2\_TajimasD\_data

|     |      |          |         |         |         |
|-----|------|----------|---------|---------|---------|
| CEU | NPIP | 28012517 | 9.9711  | 8.8692  | 0.3708  |
| CEU | NPIP | 28017517 | 10.1622 | 10.916  | -0.2091 |
| CEU | NPIP | 28022517 | 9.5848  | 9.3809  | 0.0651  |
| CEU | NPIP | 28027517 | 6.1408  | 6.8225  | -0.2917 |
| CEU | NPIP | 28032517 | 2.8194  | 5.458   | -1.3794 |
| CEU | NPIP | 28037517 | 4.9971  | 5.7991  | -0.3972 |
| CEU | NPIP | 28042517 | 5.3719  | 5.9697  | -0.2885 |
| CEU | NPIP | 28047517 | 6.6461  | 5.9697  | 0.3264  |
| CEU | NPIP | 28052517 | 9.3711  | 6.8225  | 1.0905  |
| CEU | NPIP | 28057517 | 12.4626 | 9.3809  | 0.9845  |
| CEU | NPIP | 28062517 | 14.3857 | 10.5749 | 1.0888  |
| CEU | NPIP | 28067517 | 12.2455 | 9.0398  | 1.0599  |
| CEU | NPIP | 28072517 | 14.2358 | 9.2104  | 1.633   |
| CEU | NPIP | 28077517 | 13.369  | 7.8459  | 2.0806  |
| CEU | NPIP | 28082517 | 12.8844 | 8.6987  | 1.434   |
| CEU | NPIP | 28087517 | 9.9598  | 10.2337 | -0.0807 |
| CEU | NPIP | 28092517 | 4.287   | 8.0164  | -1.3775 |
| CEU | NPIP | 28097517 | 6.1293  | 6.9931  | -0.3614 |
| CEU | NPIP | 28102517 | 4.9913  | 5.6286  | -0.3242 |
| CEU | NPIP | 28107517 | 2.9528  | 5.1169  | -1.1979 |
| CEU | NPIP | 28112517 | 3.3072  | 6.6519  | -1.4644 |
| CEU | NPIP | 28117517 | 3.954   | 7.5047  | -1.3931 |
| CEU | NPIP | 28122517 | 3.7904  | 5.7991  | -0.9949 |
| CEU | NPIP | 28127517 | 2.9672  | 4.4346  | -0.9207 |
| CEU | NPIP | 28132517 | 2.7681  | 5.1169  | -1.3001 |
| CEU | NPIP | 28137517 | 2.7236  | 5.7991  | -1.5233 |
| CEU | NPIP | 28142517 | 2.6141  | 5.1169  | -1.3853 |
| CEU | NPIP | 28147517 | 5.4622  | 5.6286  | -0.0846 |
| CEU | NPIP | 28152517 | 4.9975  | 5.9697  | -0.4692 |
| CEU | NPIP | 28157517 | 1.7017  | 4.0935  | -1.6083 |
| CEU | NPIP | 28162517 | 2.5203  | 3.7524  | -0.8926 |
| CEU | NPIP | 28167517 | 3.8677  | 4.4346  | -0.3557 |
| CEU | NPIP | 28172517 | 4.8075  | 5.7991  | -0.4911 |
| CEU | NPIP | 28177517 | 4.8885  | 7.1636  | -0.9313 |
| CEU | NPIP | 28182517 | 2.4869  | 5.9697  | -1.6808 |
| CEU | NPIP | 28187517 | 2.1936  | 5.458   | -1.7066 |
| CEU | NPIP | 28192517 | 3.3597  | 5.6286  | -1.1541 |
| CEU | NPIP | 28197517 | 5.8712  | 6.8225  | -0.4071 |
| CEU | NPIP | 28202517 | 5.4075  | 7.3342  | -0.772  |
| CEU | NPIP | 28207517 | 3.8736  | 6.8225  | -1.2618 |
| CEU | NPIP | 28212517 | 5.0594  | 6.9931  | -0.8091 |
| CEU | NPIP | 28217517 | 4.718   | 6.3108  | -0.7313 |
| CEU | NPIP | 28222517 | 4.5706  | 6.1402  | -0.7386 |
| CEU | NPIP | 28227517 | 4.7336  | 6.6519  | -0.8399 |
| CEU | NPIP | 28232517 | 6.3352  | 7.5047  | -0.4589 |
| CEU | NPIP | 28237517 | 6.9851  | 8.0164  | -0.3809 |
| CEU | NPIP | 28242517 | 7.1624  | 8.6987  | -0.5263 |
| CEU | NPIP | 28247517 | 11.589  | 12.1099 | -0.131  |
| CEU | NPIP | 28252517 | 12.1599 | 11.7688 | 0.1011  |

## 2\_TajimasD\_data

|     |      |          |        |        |         |
|-----|------|----------|--------|--------|---------|
| CEU | NPIP | 28257517 | 9.4227 | 8.6987 | 0.248   |
| CEU | NPIP | 28262517 | 9.8128 | 8.6987 | 0.3817  |
| CEU | NPIP | 28267517 | 8.1616 | 7.6753 | 0.1869  |
| CEU | NPIP | 28272517 | 6.1563 | 7.3342 | -0.4719 |
| CEU | NPIP | 28277517 | 5.5933 | 8.5281 | -1.024  |
| CEU | NPIP | 28282517 | 5.2968 | 8.187  | -1.0471 |
| CEU | NPIP | 28287517 | 7.3987 | 8.187  | -0.2856 |
| CEU | NPIP | 28292517 | 9.3707 | 8.0164 | 0.5002  |
| CEU | NPIP | 28297517 | 7.4276 | 7.3342 | 0.0374  |
| CEU | NPIP | 28302517 | 4.5539 | 6.1402 | -0.7465 |
| CEU | NPIP | 28307517 | 3.6157 | 4.9463 | -0.7588 |
| CEU | NPIP | 28312517 | 2.3951 | 3.5818 | -0.8944 |
| CEU | NPIP | 28317517 | 2.1902 | 4.0935 | -1.2798 |
| CEU | NPIP | 28322517 | 4.6318 | 6.1402 | -0.7098 |
| CEU | NPIP | 28327517 | 4.8724 | 6.3108 | -0.6604 |
| CEU | NPIP | 28332517 | 5.8462 | 6.3108 | -0.2133 |
| CEU | NPIP | 28337517 | 8.3291 | 8.0164 | 0.1155  |
| CEU | NPIP | 28342517 | 6.5254 | 8.0164 | -0.5507 |
| CEU | NPIP | 28347517 | 5.7124 | 6.1402 | -0.2013 |
| CEU | NPIP | 28352517 | 4.9751 | 4.9463 | 0.0164  |
| CEU | NPIP | 28357517 | 1.9687 | 2.3879 | -0.4415 |
| CEU | NPIP | 28362517 | 0.9068 | 0.8528 | 0.1216  |
| CEU | NPIP | 28367517 | 0.9264 | 0.5117 | 1.3006  |
| CEU | NPIP | 28372517 | 2.6761 | 2.2173 | 0.5126  |
| CEU | NPIP | 28377517 | 3.0445 | 3.0701 | -0.022  |
| CEU | NPIP | 28382517 | 3.4137 | 4.2641 | -0.552  |
| CEU | NPIP | 28387517 | 4.0171 | 4.9463 | -0.5299 |
| CEU | NPIP | 28392517 | 1.7386 | 2.2173 | -0.5348 |
| CEU | NPIP | 28397517 | 0.7326 | 1.1939 | -0.822  |
| CEU | NPIP | 28402517 | 0.9571 | 1.5351 | -0.8571 |
| CEU | NPIP | 28407517 | 0.4605 | 0.6822 | -0.5789 |
| CEU | NPIP | 28412517 | 1.6182 | 1.1939 | 0.7561  |
| CEU | NPIP | 28417517 | 3.2507 | 2.8996 | 0.3158  |
| CEU | NPIP | 28422517 | 3.0445 | 4.0935 | -0.7054 |
| CEU | NPIP | 28427517 | 1.4222 | 2.5584 | -1.1318 |
| CEU | NPIP | 28432517 | 0.6112 | 0.8528 | -0.5441 |
| CEU | NPIP | 28437517 | 0.6213 | 1.0234 | -0.799  |
| CEU | NPIP | 28442517 | 0.4251 | 1.0234 | -1.1889 |
| CEU | NPIP | 28447517 | 0.9911 | 2.0467 | -1.256  |
| CEU | NPIP | 28452517 | 1.7763 | 3.4112 | -1.2841 |
| CEU | NPIP | 28457517 | 1.1901 | 2.0467 | -1.0193 |
| CEU | NPIP | 28462517 | 0.7285 | 1.5351 | -1.196  |
| CEU | NPIP | 28467517 | 0.9691 | 1.8762 | -1.1549 |
| CEU | NPIP | 28472517 | 0.3292 | 0.8528 | -1.1791 |
| CEU | NPIP | 28477517 | 0.2428 | 1.1939 | -1.6949 |
| CEU | NPIP | 28482517 | 2.1725 | 2.729  | -0.526  |
| CEU | NPIP | 28487517 | 5.8046 | 5.2874 | 0.2781  |
| CEU | NPIP | 28492517 | 6.3094 | 6.3108 | -0.0006 |
| CEU | NPIP | 28497517 | 4.8035 | 6.6519 | -0.8093 |



## 2\_TajimasD\_data

|     |      |          |         |         |         |
|-----|------|----------|---------|---------|---------|
| CEU | NPIP | 28502517 | 4.167   | 5.9697  | -0.87   |
| CEU | NPIP | 28507517 | 6.6583  | 6.3108  | 0.1595  |
| CEU | NPIP | 28512517 | 10.2168 | 9.3809  | 0.267   |
| CEU | NPIP | 28517517 | 8.4335  | 8.3576  | 0.027   |
| CEU | NPIP | 28522517 | 6.5683  | 6.4814  | 0.0389  |
| CEU | NPIP | 28527517 | 8.8998  | 8.3576  | 0.1927  |
| CEU | NPIP | 28532517 | 10.3337 | 8.6987  | 0.5601  |
| CEU | NPIP | 28537517 | 11.2229 | 8.6987  | 0.8648  |
| CEU | NPIP | 28542517 | 8.0417  | 6.9931  | 0.4388  |
| CEU | NPIP | 28547517 | 3.8064  | 5.6286  | -0.9269 |
| CEU | NPIP | 28552517 | 5.8825  | 6.9931  | -0.4647 |
| CEU | NPIP | 28557517 | 8.5929  | 7.3342  | 0.5043  |
| CEU | NPIP | 28562517 | 8.7207  | 7.5047  | 0.4771  |
| CEU | NPIP | 28567517 | 6.2189  | 7.1636  | -0.3867 |
| CEU | NPIP | 28572517 | 6.1002  | 7.5047  | -0.5511 |
| CEU | NPIP | 28577517 | 8.247   | 8.0164  | 0.0852  |
| CEU | NPIP | 28582517 | 8.7932  | 8.0164  | 0.2869  |
| CEU | NPIP | 28587517 | 9.1394  | 8.0164  | 0.4148  |
| CEU | NPIP | 28592517 | 8.6382  | 7.8459  | 0.2985  |
| CEU | NPIP | 28597517 | 6.0074  | 6.4814  | -0.2125 |
| CEU | NPIP | 28602517 | 8.2964  | 9.2104  | -0.297  |
| CEU | NPIP | 28607517 | 11.4548 | 13.4744 | -0.4593 |
| CEU | NPIP | 28612517 | 12.4659 | 12.1099 | 0.0896  |
| CEU | NPIP | 28617517 | 27.6415 | 18.0796 | 1.6427  |
| CEU | NPIP | 28622517 | 24.6246 | 17.0562 | 1.3749  |
| CEU | NPIP | 28627517 | 11.3319 | 10.2337 | 0.3235  |
| CEU | NPIP | 28632517 | 7.6524  | 8.3576  | -0.2507 |
| CEU | NPIP | 28637517 | 1.9716  | 4.4346  | -1.5454 |
| CEU | NPIP | 28642517 | 4.1775  | 6.6519  | -1.0833 |
| CEU | NPIP | 28647517 | 9.2525  | 10.916  | -0.4614 |
| CEU | NPIP | 28652517 | 10.1101 | 10.2337 | -0.0364 |
| CEU | NPIP | 28657517 | 3.6403  | 4.0935  | -0.3047 |
| CEU | NPIP | 28662517 | 0.0202  | 0.3411  | -1.2864 |
| CEU | NPIP | 28667517 | 0.0101  | 0.1706  | -0.9534 |
| CEU | NPIP | 28672517 | 0.3795  | 0.1706  | 1.2409  |
| CEU | NPIP | 28677517 | 0.4937  | 0.3411  | 0.6117  |
| CEU | NPIP | 28682517 | 0.6155  | 0.5117  | 0.3255  |
| CEU | NPIP | 28687517 | 0.9625  | 0.5117  | 1.4138  |
| CEU | NPIP | 28692517 | 0.8023  | 0.6822  | 0.3136  |
| CEU | NPIP | 28697517 | 0.5368  | 1.1939  | -1.171  |
| CEU | NPIP | 28702517 | 1.8973  | 1.3645  | 0.862   |
| CEU | NPIP | 28707517 | 3.7223  | 3.4112  | 0.2443  |
| CEU | NPIP | 28712517 | 2.1676  | 3.5818  | -1.0659 |
| CEU | NPIP | 28717517 | 0.147   | 0.8528  | -1.5894 |
| CEU | NPIP | 28722517 | 0.5813  | 0.8528  | -0.6114 |
| CEU | NPIP | 28727517 | 0.5813  | 0.8528  | -0.6114 |
| CEU | NPIP | 28732517 | 0.49    | 0.8528  | -0.817  |
| CEU | NPIP | 28737517 | 1.1806  | 1.8762  | -0.8856 |
| CEU | NPIP | 28742517 | 1.2255  | 1.3645  | -0.2249 |

## 2\_TajimasD\_data

|     |      |          |         |         |         |
|-----|------|----------|---------|---------|---------|
| CEU | NPIP | 28747517 | 2.7155  | 4.0935  | -0.9266 |
| CEU | NPIP | 28752517 | 7.3123  | 7.3342  | -0.0088 |
| CEU | NPIP | 28757517 | 5.3886  | 4.0935  | 0.8709  |
| CEU | NPIP | 28762517 | 3.2738  | 2.729   | 0.515   |
| CEU | NPIP | 28767517 | 4.0381  | 3.0701  | 0.8303  |
| CEU | NPIP | 28772517 | 1.0313  | 1.0234  | 0.0157  |
| CEU | NPIP | 28777517 | 0.9773  | 0.6822  | 0.7706  |
| CEU | NPIP | 28782517 | 1.0361  | 0.6822  | 0.9241  |
| CEU | NPIP | 28787517 | 0.0689  | 0.1706  | -0.6041 |
| CEU | NPIP | 28792517 | 0       | 0       | 0       |
| CEU | NPIP | 28797517 | 1.7811  | 1.5351  | 0.3648  |
| CEU | NPIP | 28802517 | 2.5189  | 2.5584  | -0.0393 |
| CEU | NPIP | 28807517 | 2.7098  | 2.3879  | 0.339   |
| CEU | NPIP | 28812517 | 2.6384  | 3.2407  | -0.4939 |
| CEU | NPIP | 28817517 | 1.6392  | 2.8996  | -1.1335 |
| CEU | NPIP | 28822517 | 7.7135  | 5.458   | 1.1791  |
| CEU | NPIP | 28827517 | 9.8868  | 7.1636  | 1.1147  |
| CEU | NPIP | 28832517 | 8.0911  | 6.1402  | 0.918   |
| CEU | NPIP | 28837517 | 8.9481  | 7.8459  | 0.4152  |
| CEU | NPIP | 28842517 | 10.1534 | 9.3809  | 0.2468  |
| CEU | NPIP | 28847517 | 8.6947  | 7.6753  | 0.3918  |
| CEU | NPIP | 28852517 | 5.1072  | 4.4346  | 0.422   |
| CEU | NPIP | 28857517 | 5.6221  | 4.7757  | 0.4978  |
| CHB | NPIP | 27847517 | 11.4917 | 8.8096  | 0.9055  |
| CHB | NPIP | 27852517 | 18.518  | 12.7061 | 1.3933  |
| CHB | NPIP | 27857517 | 16.7021 | 12.8755 | 0.9059  |
| CHB | NPIP | 27862517 | 9.0693  | 8.6402  | 0.1475  |
| CHB | NPIP | 27867517 | 6.3453  | 6.946   | -0.2521 |
| CHB | NPIP | 27872517 | 7.7853  | 7.7931  | -0.0029 |
| CHB | NPIP | 27877517 | 7.577   | 7.6237  | -0.018  |
| CHB | NPIP | 27882517 | 5.8671  | 6.946   | -0.4529 |
| CHB | NPIP | 27887517 | 9.6979  | 8.8096  | 0.2999  |
| CHB | NPIP | 27892517 | 17.833  | 12.1979 | 1.4039  |
| CHB | NPIP | 27897517 | 18.9334 | 14.0615 | 1.061   |
| CHB | NPIP | 27902517 | 13.1395 | 12.5367 | 0.1464  |
| CHB | NPIP | 27907517 | 9.9912  | 10.6731 | -0.1926 |
| CHB | NPIP | 27912517 | 8.7399  | 11.012  | -0.6232 |
| CHB | NPIP | 27917517 | 6.6944  | 10.3343 | -1.0595 |
| CHB | NPIP | 27922517 | 7.6281  | 9.9955  | -0.7109 |
| CHB | NPIP | 27927517 | 6.69    | 10.5037 | -1.0934 |
| CHB | NPIP | 27932517 | 8.1399  | 8.979   | -0.2784 |
| CHB | NPIP | 27937517 | 13.5519 | 9.6567  | 1.2078  |
| CHB | NPIP | 27942517 | 15.5134 | 14.0615 | 0.3162  |
| CHB | NPIP | 27947517 | 18.4906 | 15.925  | 0.4963  |
| CHB | NPIP | 27952517 | 14.9579 | 12.5367 | 0.5878  |
| CHB | NPIP | 27957517 | 9.3034  | 10.8426 | -0.4284 |
| CHB | NPIP | 27962517 | 10.1266 | 9.9955  | 0.0394  |
| CHB | NPIP | 27967517 | 10.3562 | 10.3343 | 0.0064  |
| CHB | NPIP | 27972517 | 10.6573 | 10.1649 | 0.1456  |

## 2\_TajimasD\_data

|     |      |          |         |         |         |
|-----|------|----------|---------|---------|---------|
| CHB | NPIP | 27977517 | 11.9674 | 7.9625  | 1.4841  |
| CHB | NPIP | 27982517 | 9.7807  | 8.1319  | 0.5993  |
| CHB | NPIP | 27987517 | 9.3807  | 9.4872  | -0.0336 |
| CHB | NPIP | 27992517 | 9.4576  | 8.6402  | 0.281   |
| CHB | NPIP | 27997517 | 7.502   | 8.979   | -0.49   |
| CHB | NPIP | 28002517 | 8.6714  | 10.8426 | -0.6043 |
| CHB | NPIP | 28007517 | 6.972   | 7.6237  | -0.2513 |
| CHB | NPIP | 28012517 | 8.051   | 8.6402  | -0.2025 |
| CHB | NPIP | 28017517 | 9.2996  | 12.3673 | -0.7544 |
| CHB | NPIP | 28022517 | 10.3448 | 12.1979 | -0.4617 |
| CHB | NPIP | 28027517 | 7.2241  | 9.1484  | -0.6274 |
| CHB | NPIP | 28032517 | 3.0148  | 7.1154  | -1.684  |
| CHB | NPIP | 28037517 | 5.3023  | 8.4708  | -1.1092 |
| CHB | NPIP | 28042517 | 5.6246  | 8.4708  | -0.9964 |
| CHB | NPIP | 28047517 | 7.2875  | 9.8261  | -0.7745 |
| CHB | NPIP | 28052517 | 10.5215 | 12.1979 | -0.4177 |
| CHB | NPIP | 28057517 | 13.345  | 11.3508 | 0.5317  |
| CHB | NPIP | 28062517 | 15.0487 | 11.1814 | 1.0457  |
| CHB | NPIP | 28067517 | 13.1074 | 12.0285 | 0.2724  |
| CHB | NPIP | 28072517 | 14.1729 | 13.2144 | 0.2214  |
| CHB | NPIP | 28077517 | 13.3666 | 12.3673 | 0.2457  |
| CHB | NPIP | 28082517 | 15.6952 | 12.5367 | 0.7668  |
| CHB | NPIP | 28087517 | 14.467  | 11.5202 | 0.7748  |
| CHB | NPIP | 28092517 | 9.2998  | 11.5202 | -0.5838 |
| CHB | NPIP | 28097517 | 10.2994 | 14.5697 | -0.8991 |
| CHB | NPIP | 28102517 | 10.1813 | 13.5532 | -0.7604 |
| CHB | NPIP | 28107517 | 8.498   | 10.8426 | -0.6525 |
| CHB | NPIP | 28112517 | 6.4032  | 8.979   | -0.8545 |
| CHB | NPIP | 28117517 | 8.2844  | 9.6567  | -0.4255 |
| CHB | NPIP | 28122517 | 7.9655  | 8.8096  | -0.285  |
| CHB | NPIP | 28127517 | 5.8471  | 7.9625  | -0.7839 |
| CHB | NPIP | 28132517 | 5.683   | 8.8096  | -1.0556 |
| CHB | NPIP | 28137517 | 6.4241  | 8.4708  | -0.7165 |
| CHB | NPIP | 28142517 | 7.0141  | 8.4708  | -0.51   |
| CHB | NPIP | 28147517 | 9.4074  | 10.6731 | -0.3575 |
| CHB | NPIP | 28152517 | 7.9539  | 9.9955  | -0.6131 |
| CHB | NPIP | 28157517 | 6.4889  | 8.1319  | -0.5972 |
| CHB | NPIP | 28162517 | 7.2202  | 8.4708  | -0.4378 |
| CHB | NPIP | 28167517 | 6.1988  | 9.4872  | -1.0366 |
| CHB | NPIP | 28172517 | 7.2627  | 9.3178  | -0.6587 |
| CHB | NPIP | 28177517 | 7.7457  | 9.3178  | -0.5039 |
| CHB | NPIP | 28182517 | 8.9906  | 12.0285 | -0.7669 |
| CHB | NPIP | 28187517 | 8.7447  | 13.045  | -1.0056 |
| CHB | NPIP | 28192517 | 6.3534  | 10.1649 | -1.1267 |
| CHB | NPIP | 28197517 | 9.0208  | 10.3343 | -0.3823 |
| CHB | NPIP | 28202517 | 7.628   | 9.4872  | -0.5861 |
| CHB | NPIP | 28207517 | 5.6139  | 8.1319  | -0.9152 |
| CHB | NPIP | 28212517 | 6.8962  | 9.3178  | -0.7762 |
| CHB | NPIP | 28217517 | 7.7601  | 8.979   | -0.4043 |

## 2\_TajimasD\_data

|     |      |          |         |         |         |
|-----|------|----------|---------|---------|---------|
| CHB | NPIP | 28222517 | 9.4401  | 9.9955  | -0.1668 |
| CHB | NPIP | 28227517 | 10.566  | 10.8426 | -0.077  |
| CHB | NPIP | 28232517 | 18.046  | 15.2474 | 0.5643  |
| CHB | NPIP | 28237517 | 18.0943 | 16.4333 | 0.3118  |
| CHB | NPIP | 28242517 | 14.4101 | 13.892  | 0.1141  |
| CHB | NPIP | 28247517 | 15.792  | 14.7391 | 0.2193  |
| CHB | NPIP | 28252517 | 13.0942 | 13.5532 | -0.1035 |
| CHB | NPIP | 28257517 | 10.6216 | 11.3508 | -0.1944 |
| CHB | NPIP | 28262517 | 8.4171  | 10.6731 | -0.6372 |
| CHB | NPIP | 28267517 | 6.4481  | 10.1649 | -1.0987 |
| CHB | NPIP | 28272517 | 5.8233  | 9.4872  | -1.1549 |
| CHB | NPIP | 28277517 | 4.7252  | 9.6567  | -1.5292 |
| CHB | NPIP | 28282517 | 5.1591  | 10.1649 | -1.4798 |
| CHB | NPIP | 28287517 | 7.418   | 10.1649 | -0.812  |
| CHB | NPIP | 28292517 | 8.3666  | 8.979   | -0.2032 |
| CHB | NPIP | 28297517 | 5.0699  | 6.7766  | -0.7326 |
| CHB | NPIP | 28302517 | 3.2273  | 5.0825  | -1.03   |
| CHB | NPIP | 28307517 | 4.6172  | 5.4213  | -0.4216 |
| CHB | NPIP | 28312517 | 3.2608  | 4.913   | -0.9451 |
| CHB | NPIP | 28317517 | 2.8142  | 3.7271  | -0.6632 |
| CHB | NPIP | 28322517 | 5.7331  | 5.5907  | 0.0727  |
| CHB | NPIP | 28327517 | 5.5258  | 5.4213  | 0.0548  |
| CHB | NPIP | 28332517 | 6.0634  | 6.2684  | -0.0944 |
| CHB | NPIP | 28337517 | 9.5191  | 8.3013  | 0.4343  |
| CHB | NPIP | 28342517 | 7.5728  | 7.1154  | 0.1878  |
| CHB | NPIP | 28347517 | 5.4634  | 6.7766  | -0.5637 |
| CHB | NPIP | 28352517 | 4.8011  | 5.4213  | -0.3252 |
| CHB | NPIP | 28357517 | 2.0259  | 2.8801  | -0.7702 |
| CHB | NPIP | 28362517 | 0.751   | 1.3553  | -0.9794 |
| CHB | NPIP | 28367517 | 0.8837  | 1.0165  | -0.2643 |
| CHB | NPIP | 28372517 | 2.3783  | 2.7106  | -0.3149 |
| CHB | NPIP | 28377517 | 2.4072  | 2.5412  | -0.1338 |
| CHB | NPIP | 28382517 | 3.0228  | 2.033   | 1.1803  |
| CHB | NPIP | 28387517 | 3.695   | 2.8801  | 0.7347  |
| CHB | NPIP | 28392517 | 1.74    | 2.3718  | -0.6669 |
| CHB | NPIP | 28397517 | 1.1043  | 1.6942  | -0.8096 |
| CHB | NPIP | 28402517 | 1.0335  | 1.3553  | -0.5215 |
| CHB | NPIP | 28407517 | 0.3619  | 0.6777  | -0.8256 |
| CHB | NPIP | 28412517 | 1.2994  | 1.6942  | -0.5418 |
| CHB | NPIP | 28417517 | 2.9656  | 2.8801  | 0.0771  |
| CHB | NPIP | 28422517 | 3.3426  | 3.7271  | -0.2793 |
| CHB | NPIP | 28427517 | 1.7537  | 3.0495  | -1.1144 |
| CHB | NPIP | 28432517 | 0.5254  | 2.033   | -1.7978 |
| CHB | NPIP | 28437517 | 0.6417  | 2.033   | -1.6591 |
| CHB | NPIP | 28442517 | 0.6653  | 1.5247  | -1.2768 |
| CHB | NPIP | 28447517 | 0.6307  | 1.5247  | -1.3282 |
| CHB | NPIP | 28452517 | 0.744   | 1.8636  | -1.4285 |
| CHB | NPIP | 28457517 | 0.5656  | 1.1859  | -1.1072 |
| CHB | NPIP | 28462517 | 0.4721  | 1.6942  | -1.6772 |

## 2\_TajimasD\_data

|     |      |          |         |         |         |
|-----|------|----------|---------|---------|---------|
| CHB | NPIP | 28467517 | 0.4915  | 1.8636  | -1.7506 |
| CHB | NPIP | 28472517 | 0.0388  | 0.5082  | -1.4735 |
| CHB | NPIP | 28477517 | 0.2421  | 1.0165  | -1.5411 |
| CHB | NPIP | 28482517 | 2.0255  | 4.7436  | -1.6033 |
| CHB | NPIP | 28487517 | 4.9848  | 9.3178  | -1.3889 |
| CHB | NPIP | 28492517 | 5.5521  | 9.4872  | -1.2404 |
| CHB | NPIP | 28497517 | 4.5376  | 8.1319  | -1.3064 |
| CHB | NPIP | 28502517 | 3.3956  | 8.1319  | -1.7215 |
| CHB | NPIP | 28507517 | 5.3541  | 8.6402  | -1.1296 |
| CHB | NPIP | 28512517 | 9.0103  | 9.9955  | -0.2958 |
| CHB | NPIP | 28517517 | 8.2829  | 8.3013  | -0.0066 |
| CHB | NPIP | 28522517 | 7.0779  | 5.7601  | 0.6547  |
| CHB | NPIP | 28527517 | 7.8664  | 7.1154  | 0.3084  |
| CHB | NPIP | 28532517 | 8.1974  | 8.1319  | 0.0238  |
| CHB | NPIP | 28537517 | 8.628   | 9.1484  | -0.1697 |
| CHB | NPIP | 28542517 | 7.0885  | 10.1649 | -0.9094 |
| CHB | NPIP | 28547517 | 3.6265  | 9.3178  | -1.8243 |
| CHB | NPIP | 28552517 | 4.5167  | 9.1484  | -1.5101 |
| CHB | NPIP | 28557517 | 7.2433  | 11.5202 | -1.1245 |
| CHB | NPIP | 28562517 | 7.4002  | 11.6896 | -1.1124 |
| CHB | NPIP | 28567517 | 5.3794  | 9.9955  | -1.3861 |
| CHB | NPIP | 28572517 | 4.2686  | 9.8261  | -1.6956 |
| CHB | NPIP | 28577517 | 5.5953  | 8.6402  | -1.0466 |
| CHB | NPIP | 28582517 | 5.8473  | 9.1484  | -1.0763 |
| CHB | NPIP | 28587517 | 5.7687  | 10.3343 | -1.329  |
| CHB | NPIP | 28592517 | 5.2235  | 9.4872  | -1.344  |
| CHB | NPIP | 28597517 | 3.6514  | 7.4543  | -1.4969 |
| CHB | NPIP | 28602517 | 5.972   | 9.8261  | -1.1759 |
| CHB | NPIP | 28607517 | 8.2374  | 12.1979 | -0.9867 |
| CHB | NPIP | 28612517 | 9.3982  | 11.1814 | -0.4822 |
| CHB | NPIP | 28617517 | 22.3821 | 18.2968 | 0.6919  |
| CHB | NPIP | 28622517 | 20.7331 | 18.6357 | 0.349   |
| CHB | NPIP | 28627517 | 8.9849  | 12.3673 | -0.8318 |
| CHB | NPIP | 28632517 | 5.7888  | 10.5037 | -1.3517 |
| CHB | NPIP | 28637517 | 2.3236  | 7.9625  | -2.0896 |
| CHB | NPIP | 28642517 | 3.4708  | 9.4872  | -1.8965 |
| CHB | NPIP | 28647517 | 6.6288  | 13.5532 | -1.5616 |
| CHB | NPIP | 28652517 | 7.4363  | 11.3508 | -1.0436 |
| CHB | NPIP | 28657517 | 2.7049  | 3.7271  | -0.7426 |
| CHB | NPIP | 28662517 | 0       | 0       | 0       |
| CHB | NPIP | 28667517 | 0       | 0       | 0       |
| CHB | NPIP | 28672517 | 0.3952  | 0.3388  | 0.2262  |
| CHB | NPIP | 28677517 | 0.4523  | 0.5082  | -0.1755 |
| CHB | NPIP | 28682517 | 0.383   | 0.5082  | -0.393  |
| CHB | NPIP | 28687517 | 0.8195  | 0.6777  | 0.3707  |
| CHB | NPIP | 28692517 | 0.9092  | 1.5247  | -0.9144 |
| CHB | NPIP | 28697517 | 0.6379  | 1.6942  | -1.4496 |
| CHB | NPIP | 28702517 | 1.7678  | 1.6942  | 0.101   |
| CHB | NPIP | 28707517 | 3.8041  | 3.7271  | 0.0559  |

## 2\_TajimasD\_data

|     |      |          |         |         |         |
|-----|------|----------|---------|---------|---------|
| CHB | NPIP | 28712517 | 2.5189  | 3.5577  | -0.7851 |
| CHB | NPIP | 28717517 | 0.2602  | 1.0165  | -1.5051 |
| CHB | NPIP | 28722517 | 0.558   | 0.5082  | 0.1563  |
| CHB | NPIP | 28727517 | 0.558   | 0.5082  | 0.1563  |
| CHB | NPIP | 28732517 | 0.309   | 0.8471  | -1.2134 |
| CHB | NPIP | 28737517 | 0.6092  | 2.033   | -1.6979 |
| CHB | NPIP | 28742517 | 0.9654  | 2.3718  | -1.4846 |
| CHB | NPIP | 28747517 | 2.1946  | 3.5577  | -1.0302 |
| CHB | NPIP | 28752517 | 5.9762  | 5.7601  | 0.1074  |
| CHB | NPIP | 28757517 | 4.8306  | 4.5742  | 0.1561  |
| CHB | NPIP | 28762517 | 3.0324  | 4.066   | -0.697  |
| CHB | NPIP | 28767517 | 3.6189  | 4.066   | -0.3015 |
| CHB | NPIP | 28772517 | 0.9703  | 1.1859  | -0.3848 |
| CHB | NPIP | 28777517 | 0.9732  | 1.0165  | -0.0862 |
| CHB | NPIP | 28782517 | 1.0849  | 1.3553  | -0.4382 |
| CHB | NPIP | 28787517 | 0.1117  | 0.3388  | -0.911  |
| CHB | NPIP | 28792517 | 0       | 0       | 0       |
| CHB | NPIP | 28797517 | 1.8487  | 1.3553  | 0.7996  |
| CHB | NPIP | 28802517 | 2.5563  | 2.2024  | 0.3963  |
| CHB | NPIP | 28807517 | 2.577   | 2.5412  | 0.0357  |
| CHB | NPIP | 28812517 | 3.1251  | 4.066   | -0.6345 |
| CHB | NPIP | 28817517 | 2.0238  | 3.8965  | -1.3098 |
| CHB | NPIP | 28822517 | 5.9836  | 7.6237  | -0.6325 |
| CHB | NPIP | 28827517 | 7.3413  | 10.5037 | -0.9066 |
| CHB | NPIP | 28832517 | 5.6063  | 9.4872  | -1.2233 |
| CHB | NPIP | 28837517 | 6.5545  | 11.012  | -1.2226 |
| CHB | NPIP | 28842517 | 7.5212  | 10.8426 | -0.9244 |
| CHB | NPIP | 28847517 | 6.6423  | 9.3178  | -0.8576 |
| CHB | NPIP | 28852517 | 4.0678  | 7.7931  | -1.408  |
| CHB | NPIP | 28857517 | 4.5197  | 7.4543  | -1.1551 |
| YRI | NPIP | 27847517 | 13.2087 | 13.9492 | -0.1619 |
| YRI | NPIP | 27852517 | 20.6694 | 18.3188 | 0.3963  |
| YRI | NPIP | 27857517 | 20.2097 | 19.3272 | 0.1413  |
| YRI | NPIP | 27862517 | 11.8535 | 15.6298 | -0.7411 |
| YRI | NPIP | 27867517 | 10.0384 | 14.6214 | -0.9585 |
| YRI | NPIP | 27872517 | 11.665  | 14.2853 | -0.5602 |
| YRI | NPIP | 27877517 | 10.8117 | 16.134  | -1.0134 |
| YRI | NPIP | 27882517 | 8.8545  | 14.9575 | -1.249  |
| YRI | NPIP | 27887517 | 12.9116 | 12.6047 | 0.0739  |
| YRI | NPIP | 27892517 | 20.5615 | 15.9659 | 0.8838  |
| YRI | NPIP | 27897517 | 21.7034 | 19.3272 | 0.3805  |
| YRI | NPIP | 27902517 | 16.8894 | 17.8146 | -0.1602 |
| YRI | NPIP | 27907517 | 12.1804 | 17.8146 | -0.9756 |
| YRI | NPIP | 27912517 | 12.1448 | 19.1591 | -1.1326 |
| YRI | NPIP | 27917517 | 12.3023 | 17.8146 | -0.9545 |
| YRI | NPIP | 27922517 | 15.4756 | 18.991  | -0.5725 |
| YRI | NPIP | 27927517 | 17.7148 | 18.1507 | -0.0741 |
| YRI | NPIP | 27932517 | 14.4877 | 16.4701 | -0.3701 |
| YRI | NPIP | 27937517 | 14.3304 | 15.9659 | -0.3145 |

## 2\_TajimasD\_data

|     |      |          |         |         |         |
|-----|------|----------|---------|---------|---------|
| YRI | NPIP | 27942517 | 20.7512 | 18.1507 | 0.4423  |
| YRI | NPIP | 27947517 | 23.8115 | 18.991  | 0.785   |
| YRI | NPIP | 27952517 | 17.553  | 14.1172 | 0.7429  |
| YRI | NPIP | 27957517 | 13.8902 | 13.1089 | 0.1812  |
| YRI | NPIP | 27962517 | 13.2781 | 14.2853 | -0.2153 |
| YRI | NPIP | 27967517 | 11.0125 | 13.613  | -0.582  |
| YRI | NPIP | 27972517 | 10.6462 | 14.1172 | -0.7505 |
| YRI | NPIP | 27977517 | 11.3158 | 13.445  | -0.4822 |
| YRI | NPIP | 27982517 | 9.8965  | 13.2769 | -0.7747 |
| YRI | NPIP | 27987517 | 13.8236 | 16.302  | -0.4672 |
| YRI | NPIP | 27992517 | 16.0523 | 15.9659 | 0.0166  |
| YRI | NPIP | 27997517 | 14.1882 | 14.6214 | -0.0906 |
| YRI | NPIP | 28002517 | 17.5641 | 18.6549 | -0.1807 |
| YRI | NPIP | 28007517 | 14.6737 | 14.9575 | -0.0581 |
| YRI | NPIP | 28012517 | 11.8735 | 11.2602 | 0.1642  |
| YRI | NPIP | 28017517 | 12.1294 | 15.2937 | -0.634  |
| YRI | NPIP | 28022517 | 12.2838 | 14.9575 | -0.5472 |
| YRI | NPIP | 28027517 | 9.397   | 11.7644 | -0.6082 |
| YRI | NPIP | 28032517 | 6.3113  | 11.7644 | -1.4009 |
| YRI | NPIP | 28037517 | 7.2998  | 12.1005 | -1.201  |
| YRI | NPIP | 28042517 | 7.3378  | 11.7644 | -1.1372 |
| YRI | NPIP | 28047517 | 8.4011  | 13.9492 | -1.2134 |
| YRI | NPIP | 28052517 | 9.9328  | 16.8062 | -1.2586 |
| YRI | NPIP | 28057517 | 10.8335 | 15.4617 | -0.9177 |
| YRI | NPIP | 28062517 | 13.1161 | 14.1172 | -0.2165 |
| YRI | NPIP | 28067517 | 15.2124 | 16.134  | -0.1755 |
| YRI | NPIP | 28072517 | 17.2069 | 15.4617 | 0.3461  |
| YRI | NPIP | 28077517 | 14.893  | 13.2769 | 0.3704  |
| YRI | NPIP | 28082517 | 17.7746 | 17.6465 | 0.0224  |
| YRI | NPIP | 28087517 | 16.8097 | 17.8146 | -0.174  |
| YRI | NPIP | 28092517 | 11.87   | 14.1172 | -0.4859 |
| YRI | NPIP | 28097517 | 14.1298 | 15.4617 | -0.2641 |
| YRI | NPIP | 28102517 | 11.7353 | 15.4617 | -0.7389 |
| YRI | NPIP | 28107517 | 8.5066  | 13.2769 | -1.0933 |
| YRI | NPIP | 28112517 | 8.1138  | 12.4366 | -1.0539 |
| YRI | NPIP | 28117517 | 8.863   | 12.9408 | -0.9575 |
| YRI | NPIP | 28122517 | 8.2024  | 11.4282 | -0.8516 |
| YRI | NPIP | 28127517 | 7.465   | 10.924  | -0.9527 |
| YRI | NPIP | 28132517 | 6.8652  | 9.4115  | -0.8059 |
| YRI | NPIP | 28137517 | 7.071   | 9.2434  | -0.6991 |
| YRI | NPIP | 28142517 | 7.7693  | 12.1005 | -1.0836 |
| YRI | NPIP | 28147517 | 10.8139 | 13.7811 | -0.6564 |
| YRI | NPIP | 28152517 | 10.0279 | 12.4366 | -0.5872 |
| YRI | NPIP | 28157517 | 7.1894  | 12.7727 | -1.3273 |
| YRI | NPIP | 28162517 | 7.3499  | 11.9324 | -1.1617 |
| YRI | NPIP | 28167517 | 7.2949  | 10.5879 | -0.9339 |
| YRI | NPIP | 28172517 | 8.0656  | 12.6047 | -1.0927 |
| YRI | NPIP | 28177517 | 8.5859  | 13.1089 | -1.0492 |
| YRI | NPIP | 28182517 | 9.4609  | 14.1172 | -1.0068 |

## 2\_TajimasD\_data

|     |      |          |         |         |         |
|-----|------|----------|---------|---------|---------|
| YRI | NPIP | 28187517 | 8.1669  | 12.7727 | -1.095  |
| YRI | NPIP | 28192517 | 6.7817  | 9.7476  | -0.9086 |
| YRI | NPIP | 28197517 | 10.3133 | 10.756  | -0.1237 |
| YRI | NPIP | 28202517 | 9.7004  | 11.0921 | -0.3779 |
| YRI | NPIP | 28207517 | 7.5286  | 10.4199 | -0.8323 |
| YRI | NPIP | 28212517 | 8.814   | 11.0921 | -0.6185 |
| YRI | NPIP | 28217517 | 9.2665  | 12.1005 | -0.709  |
| YRI | NPIP | 28222517 | 10.5922 | 12.7727 | -0.5184 |
| YRI | NPIP | 28227517 | 12.7734 | 13.2769 | -0.1154 |
| YRI | NPIP | 28232517 | 16.5963 | 16.9743 | -0.0686 |
| YRI | NPIP | 28237517 | 16.5823 | 18.991  | -0.3923 |
| YRI | NPIP | 28242517 | 14.6608 | 16.302  | -0.3094 |
| YRI | NPIP | 28247517 | 19.1492 | 15.9659 | 0.6122  |
| YRI | NPIP | 28252517 | 19.4439 | 16.8062 | 0.483   |
| YRI | NPIP | 28257517 | 15.1659 | 14.9575 | 0.0427  |
| YRI | NPIP | 28262517 | 15.2272 | 14.1172 | 0.24    |
| YRI | NPIP | 28267517 | 14.5017 | 13.1089 | 0.3231  |
| YRI | NPIP | 28272517 | 11.3038 | 12.7727 | -0.3492 |
| YRI | NPIP | 28277517 | 9.8031  | 15.4617 | -1.1221 |
| YRI | NPIP | 28282517 | 9.143   | 16.302  | -1.3496 |
| YRI | NPIP | 28287517 | 7.2763  | 13.9492 | -1.4594 |
| YRI | NPIP | 28292517 | 9.202   | 13.7811 | -1.013  |
| YRI | NPIP | 28297517 | 10.2113 | 12.6047 | -0.5762 |
| YRI | NPIP | 28302517 | 6.4665  | 7.5628  | -0.4244 |
| YRI | NPIP | 28307517 | 5.7117  | 8.067   | -0.8595 |
| YRI | NPIP | 28312517 | 4.7154  | 9.9157  | -1.5679 |
| YRI | NPIP | 28317517 | 2.5106  | 8.235   | -2.0497 |
| YRI | NPIP | 28322517 | 5.0579  | 9.4115  | -1.3779 |
| YRI | NPIP | 28327517 | 5.3801  | 8.4031  | -1.0625 |
| YRI | NPIP | 28332517 | 6.8714  | 8.7392  | -0.6331 |
| YRI | NPIP | 28337517 | 11.1725 | 12.4366 | -0.3082 |
| YRI | NPIP | 28342517 | 8.2413  | 10.0837 | -0.5469 |
| YRI | NPIP | 28347517 | 7.2362  | 10.2518 | -0.8814 |
| YRI | NPIP | 28352517 | 6.4524  | 8.9073  | -0.8176 |
| YRI | NPIP | 28357517 | 1.7844  | 3.3612  | -1.2457 |
| YRI | NPIP | 28362517 | 0.3787  | 1.6806  | -1.791  |
| YRI | NPIP | 28367517 | 0.6754  | 2.1848  | -1.6947 |
| YRI | NPIP | 28372517 | 2.316   | 4.0335  | -1.1621 |
| YRI | NPIP | 28377517 | 2.6427  | 3.5293  | -0.6722 |
| YRI | NPIP | 28382517 | 3.7885  | 5.2099  | -0.7694 |
| YRI | NPIP | 28387517 | 4.7017  | 6.2183  | -0.7011 |
| YRI | NPIP | 28392517 | 2.5109  | 3.5293  | -0.7722 |
| YRI | NPIP | 28397517 | 1.7935  | 2.1848  | -0.4393 |
| YRI | NPIP | 28402517 | 1.9932  | 1.6806  | 0.43    |
| YRI | NPIP | 28407517 | 1.0482  | 0.8403  | 0.4696  |
| YRI | NPIP | 28412517 | 1.2753  | 1.6806  | -0.5576 |
| YRI | NPIP | 28417517 | 2.7204  | 3.1932  | -0.3899 |
| YRI | NPIP | 28422517 | 2.9892  | 4.3696  | -0.8716 |
| YRI | NPIP | 28427517 | 2.226   | 3.6974  | -1.0725 |



## 2\_TajimasD\_data

|     |      |          |         |         |         |
|-----|------|----------|---------|---------|---------|
| YRI | NPIP | 28432517 | 1.6173  | 1.6806  | -0.0871 |
| YRI | NPIP | 28437517 | 1.1459  | 1.6806  | -0.7356 |
| YRI | NPIP | 28442517 | 1.33    | 2.0167  | -0.8211 |
| YRI | NPIP | 28447517 | 1.0196  | 1.5126  | -0.7341 |
| YRI | NPIP | 28452517 | 0.6965  | 3.0251  | -2.0088 |
| YRI | NPIP | 28457517 | 0.6504  | 2.5209  | -1.8732 |
| YRI | NPIP | 28462517 | 1.6311  | 2.1848  | -0.6217 |
| YRI | NPIP | 28467517 | 1.6678  | 2.3529  | -0.7252 |
| YRI | NPIP | 28472517 | 0.2919  | 0.8403  | -1.2386 |
| YRI | NPIP | 28477517 | 0.4097  | 1.6806  | -1.7484 |
| YRI | NPIP | 28482517 | 2.1082  | 5.8822  | -1.8338 |
| YRI | NPIP | 28487517 | 5.2432  | 11.4282 | -1.6329 |
| YRI | NPIP | 28492517 | 5.9843  | 11.0921 | -1.3868 |
| YRI | NPIP | 28497517 | 6.0274  | 9.4115  | -1.071  |
| YRI | NPIP | 28502517 | 7.552   | 12.4366 | -1.1909 |
| YRI | NPIP | 28507517 | 9.2773  | 13.445  | -0.9439 |
| YRI | NPIP | 28512517 | 9.2489  | 15.1256 | -1.19   |
| YRI | NPIP | 28517517 | 7.6485  | 14.7895 | -1.4773 |
| YRI | NPIP | 28522517 | 7.0999  | 11.7644 | -1.1983 |
| YRI | NPIP | 28527517 | 8.3022  | 13.613  | -1.1887 |
| YRI | NPIP | 28532517 | 9.008   | 13.7811 | -1.056  |
| YRI | NPIP | 28537517 | 9.8347  | 13.9492 | -0.8998 |
| YRI | NPIP | 28542517 | 7.5632  | 12.4366 | -1.1881 |
| YRI | NPIP | 28547517 | 4.1184  | 8.5712  | -1.5367 |
| YRI | NPIP | 28552517 | 5.6844  | 9.2434  | -1.1454 |
| YRI | NPIP | 28557517 | 8.7194  | 11.9324 | -0.8145 |
| YRI | NPIP | 28562517 | 8.5292  | 12.2685 | -0.9234 |
| YRI | NPIP | 28567517 | 5.4573  | 11.7644 | -1.6203 |
| YRI | NPIP | 28572517 | 6.4368  | 13.445  | -1.5872 |
| YRI | NPIP | 28577517 | 7.8864  | 11.2602 | -0.9032 |
| YRI | NPIP | 28582517 | 7.5868  | 9.4115  | -0.5775 |
| YRI | NPIP | 28587517 | 7.8546  | 11.4282 | -0.9434 |
| YRI | NPIP | 28592517 | 7.2311  | 12.7727 | -1.3174 |
| YRI | NPIP | 28597517 | 6.0128  | 11.4282 | -1.4297 |
| YRI | NPIP | 28602517 | 8.1072  | 15.6298 | -1.4764 |
| YRI | NPIP | 28607517 | 12.3442 | 19.9994 | -1.1861 |
| YRI | NPIP | 28612517 | 14.0794 | 16.302  | -0.419  |
| YRI | NPIP | 28617517 | 24.8945 | 22.5203 | 0.328   |
| YRI | NPIP | 28622517 | 25.9728 | 21.512  | 0.6442  |
| YRI | NPIP | 28627517 | 17.6019 | 13.613  | 0.8928  |
| YRI | NPIP | 28632517 | 11.3443 | 10.5879 | 0.2145  |
| YRI | NPIP | 28637517 | 4.5695  | 8.7392  | -1.4134 |
| YRI | NPIP | 28642517 | 7.4333  | 12.9408 | -1.2932 |
| YRI | NPIP | 28647517 | 12.7568 | 16.6382 | -0.7176 |
| YRI | NPIP | 28652517 | 12.042  | 14.9575 | -0.5967 |
| YRI | NPIP | 28657517 | 4.3082  | 6.0502  | -0.8254 |
| YRI | NPIP | 28662517 | 0.1281  | 0.6722  | -1.4244 |
| YRI | NPIP | 28667517 | 0.1281  | 0.6722  | -1.4244 |
| YRI | NPIP | 28672517 | 0.4674  | 0.8403  | -0.8422 |

## 2\_TajimasD\_data

|     |      |          |         |         |         |
|-----|------|----------|---------|---------|---------|
| YRI | NPIP | 28677517 | 0.6851  | 1.3445  | -1.071  |
| YRI | NPIP | 28682517 | 0.3911  | 0.8403  | -1.0146 |
| YRI | NPIP | 28687517 | 0.864   | 0.8403  | 0.0535  |
| YRI | NPIP | 28692517 | 1.7146  | 1.5126  | 0.3008  |
| YRI | NPIP | 28697517 | 2.0501  | 1.5126  | 0.8004  |
| YRI | NPIP | 28702517 | 2.1752  | 1.6806  | 0.6804  |
| YRI | NPIP | 28707517 | 4.2877  | 4.3696  | -0.0517 |
| YRI | NPIP | 28712517 | 4.7731  | 4.2016  | 0.3733  |
| YRI | NPIP | 28717517 | 1.6346  | 1.0084  | 1.2484  |
| YRI | NPIP | 28722517 | 0.5916  | 0.5042  | 0.2747  |
| YRI | NPIP | 28727517 | 0.5916  | 0.5042  | 0.2747  |
| YRI | NPIP | 28732517 | 0.1335  | 0.6722  | -1.4103 |
| YRI | NPIP | 28737517 | 1.0293  | 2.689   | -1.5773 |
| YRI | NPIP | 28742517 | 2.123   | 3.0251  | -0.7782 |
| YRI | NPIP | 28747517 | 4.2176  | 6.0502  | -0.8683 |
| YRI | NPIP | 28752517 | 6.596   | 8.4031  | -0.6351 |
| YRI | NPIP | 28757517 | 5.6174  | 5.2099  | 0.2206  |
| YRI | NPIP | 28762517 | 4.3377  | 5.2099  | -0.4721 |
| YRI | NPIP | 28767517 | 3.6178  | 4.3696  | -0.4747 |
| YRI | NPIP | 28772517 | 1.2921  | 1.0084  | 0.5656  |
| YRI | NPIP | 28777517 | 1.5473  | 1.5126  | 0.0517  |
| YRI | NPIP | 28782517 | 2.0869  | 1.8487  | 0.3047  |
| YRI | NPIP | 28787517 | 0.5395  | 0.3361  | 0.8166  |
| YRI | NPIP | 28792517 | 0       | 0       | 0       |
| YRI | NPIP | 28797517 | 1.4898  | 1.1764  | 0.5605  |
| YRI | NPIP | 28802517 | 2.8223  | 2.5209  | 0.3018  |
| YRI | NPIP | 28807517 | 3.6898  | 3.5293  | 0.1217  |
| YRI | NPIP | 28812517 | 3.8352  | 4.5377  | -0.4293 |
| YRI | NPIP | 28817517 | 2.2584  | 4.3696  | -1.3331 |
| YRI | NPIP | 28822517 | 6.394   | 10.2518 | -1.1275 |
| YRI | NPIP | 28827517 | 9.3495  | 12.4366 | -0.7526 |
| YRI | NPIP | 28832517 | 7.9701  | 8.9073  | -0.3121 |
| YRI | NPIP | 28837517 | 6.152   | 9.2434  | -0.9949 |
| YRI | NPIP | 28842517 | 6.9977  | 9.9157  | -0.8798 |
| YRI | NPIP | 28847517 | 7.415   | 9.5795  | -0.6739 |
| YRI | NPIP | 28852517 | 6.0629  | 8.5712  | -0.8656 |
| YRI | NPIP | 28857517 | 7.3547  | 8.4031  | -0.3685 |
| CEU | NPIP | 27961329 | 11.4566 | 8.8692  | 0.8707  |
| CEU | NPIP | 27966329 | 10.27   | 9.0398  | 0.4067  |
| CEU | NPIP | 27971329 | 12.0623 | 9.2104  | 0.9267  |
| CEU | NPIP | 27976329 | 11.4073 | 7.3342  | 1.632   |
| CEU | NPIP | 27981329 | 10.3286 | 6.9931  | 1.3956  |
| CEU | NPIP | 27986329 | 13.6001 | 10.4043 | 0.9271  |
| CEU | NPIP | 27991329 | 13.6395 | 9.8926  | 1.1393  |
| CEU | NPIP | 27996329 | 12.5065 | 9.0398  | 1.1462  |
| CEU | NPIP | 28001329 | 14.3612 | 10.4043 | 1.1479  |
| CEU | NPIP | 28006329 | 10.5784 | 7.8459  | 1.0294  |
| CEU | NPIP | 28011329 | 8.8058  | 8.3576  | 0.1593  |
| CEU | NPIP | 28016329 | 9.8784  | 10.7454 | -0.244  |

## 2\_TajimasD\_data

|     |      |          |         |         |         |
|-----|------|----------|---------|---------|---------|
| CEU | NPIP | 28021329 | 10.2286 | 10.0632 | 0.0495  |
| CEU | NPIP | 28026329 | 6.5119  | 7.5047  | -0.3895 |
| CEU | NPIP | 28031329 | 3.8182  | 5.458   | -0.8572 |
| CEU | NPIP | 28036329 | 4.2096  | 5.458   | -0.6526 |
| CEU | NPIP | 28041329 | 5.0404  | 5.9697  | -0.4485 |
| CEU | NPIP | 28046329 | 7.5535  | 6.6519  | 0.3947  |
| CEU | NPIP | 28051329 | 9.2977  | 6.6519  | 1.1584  |
| CEU | NPIP | 28056329 | 10.9536 | 8.0164  | 1.0849  |
| CEU | NPIP | 28061329 | 13.1161 | 9.8926  | 0.9802  |
| CEU | NPIP | 28066329 | 12.4407 | 9.5515  | 0.9077  |
| CEU | NPIP | 28071329 | 12.2785 | 8.3576  | 1.3938  |
| CEU | NPIP | 28076329 | 13.8907 | 8.3576  | 1.9669  |
| CEU | NPIP | 28081329 | 15.2981 | 9.7221  | 1.7232  |
| CEU | NPIP | 28086329 | 11.0118 | 10.0632 | 0.2839  |
| CEU | NPIP | 28091329 | 5.167   | 8.3576  | -1.1342 |
| CEU | NPIP | 28096329 | 5.892   | 7.1636  | -0.5205 |
| CEU | NPIP | 28101329 | 5.1532  | 5.9697  | -0.3941 |
| CEU | NPIP | 28106329 | 3.2665  | 4.9463  | -0.958  |
| CEU | NPIP | 28111329 | 2.2626  | 6.1402  | -1.8247 |
| CEU | NPIP | 28116329 | 3.6502  | 7.6753  | -1.5471 |
| CEU | NPIP | 28121329 | 5.0608  | 6.4814  | -0.6367 |
| CEU | NPIP | 28126329 | 2.8099  | 3.9229  | -0.7763 |
| CEU | NPIP | 28131329 | 2.0161  | 4.2641  | -1.4593 |
| CEU | NPIP | 28136329 | 2.8949  | 6.4814  | -1.6075 |
| CEU | NPIP | 28141329 | 3.3467  | 6.1402  | -1.3145 |
| CEU | NPIP | 28146329 | 5.3111  | 5.2874  | 0.0127  |
| CEU | NPIP | 28151329 | 4.5599  | 5.1169  | -0.3083 |
| CEU | NPIP | 28156329 | 2.2228  | 4.6052  | -1.4465 |
| CEU | NPIP | 28161329 | 2.9584  | 4.7757  | -1.0688 |
| CEU | NPIP | 28166329 | 3.5077  | 4.4346  | -0.5816 |
| CEU | NPIP | 28171329 | 4.3659  | 5.6286  | -0.6423 |
| CEU | NPIP | 28176329 | 4.5986  | 5.9697  | -0.6617 |
| CEU | NPIP | 28181329 | 2.9777  | 5.9697  | -1.444  |
| CEU | NPIP | 28186329 | 2.7827  | 5.7991  | -1.494  |
| CEU | NPIP | 28191329 | 2.9796  | 5.458   | -1.2956 |
| CEU | NPIP | 28196329 | 5.6912  | 6.9931  | -0.5447 |
| CEU | NPIP | 28201329 | 5.3022  | 6.9931  | -0.7075 |
| CEU | NPIP | 28206329 | 4.0546  | 7.1636  | -1.2727 |
| CEU | NPIP | 28211329 | 4.303   | 6.1402  | -0.8645 |
| CEU | NPIP | 28216329 | 4.3873  | 6.1402  | -0.8249 |
| CEU | NPIP | 28221329 | 4.9652  | 7.1636  | -0.8999 |
| CEU | NPIP | 28226329 | 3.8963  | 5.7991  | -0.9424 |
| CEU | NPIP | 28231329 | 6.7877  | 7.1636  | -0.1539 |
| CEU | NPIP | 28236329 | 6.6481  | 7.8459  | -0.4512 |
| CEU | NPIP | 28241329 | 6.0284  | 8.6987  | -0.9148 |
| CEU | NPIP | 28246329 | 11.0812 | 11.7688 | -0.1777 |
| CEU | NPIP | 28251329 | 12.9028 | 12.1099 | 0.1995  |
| CEU | NPIP | 28256329 | 11.1273 | 10.4043 | 0.2097  |
| CEU | NPIP | 28261329 | 10.2206 | 8.8692  | 0.4547  |

## 2\_TajimasD\_data

|     |      |          |        |        |         |
|-----|------|----------|--------|--------|---------|
| CEU | NPIP | 28266329 | 7.2476 | 7.3342 | -0.0347 |
| CEU | NPIP | 28271329 | 6.0919 | 6.6519 | -0.2452 |
| CEU | NPIP | 28276329 | 6.7398 | 8.5281 | -0.624  |
| CEU | NPIP | 28281329 | 5.0928 | 8.3576 | -1.1605 |
| CEU | NPIP | 28286329 | 6.0567 | 7.1636 | -0.4531 |
| CEU | NPIP | 28291329 | 9.9873 | 8.8692 | 0.3762  |
| CEU | NPIP | 28296329 | 8.2506 | 8.3576 | -0.038  |
| CEU | NPIP | 28301329 | 4.114  | 5.6286 | -0.7704 |
| CEU | NPIP | 28306329 | 3.9524 | 4.9463 | -0.5668 |
| CEU | NPIP | 28311329 | 2.8649 | 4.0935 | -0.8261 |
| CEU | NPIP | 28316329 | 2.4371 | 3.7524 | -0.9529 |
| CEU | NPIP | 28321329 | 3.3053 | 5.458  | -1.1254 |
| CEU | NPIP | 28326329 | 4.9227 | 6.8225 | -0.8129 |
| CEU | NPIP | 28331329 | 6.5974 | 6.6519 | -0.0239 |
| CEU | NPIP | 28336329 | 7.4027 | 6.6519 | 0.3287  |
| CEU | NPIP | 28341329 | 6.4722 | 7.5047 | -0.4051 |
| CEU | NPIP | 28346329 | 6.659  | 7.8459 | -0.4471 |
| CEU | NPIP | 28351329 | 5.2882 | 5.7991 | -0.253  |
| CEU | NPIP | 28356329 | 1.8126 | 2.3879 | -0.6059 |
| CEU | NPIP | 28361329 | 1.2323 | 1.0234 | 0.4151  |
| CEU | NPIP | 28366329 | 1.0142 | 0.5117 | 1.576   |
| CEU | NPIP | 28371329 | 2.6269 | 1.8762 | 0.9558  |
| CEU | NPIP | 28376329 | 3.1027 | 2.8996 | 0.1827  |
| CEU | NPIP | 28381329 | 3.4228 | 4.2641 | -0.5461 |
| CEU | NPIP | 28386329 | 4.0373 | 5.2874 | -0.6722 |
| CEU | NPIP | 28391329 | 1.7013 | 2.3879 | -0.7231 |
| CEU | NPIP | 28396329 | 0.7326 | 1.1939 | -0.822  |
| CEU | NPIP | 28401329 | 1.0346 | 1.7056 | -0.919  |
| CEU | NPIP | 28406329 | 0.4605 | 0.6822 | -0.5789 |
| CEU | NPIP | 28411329 | 0.8157 | 0.3411 | 1.9025  |
| CEU | NPIP | 28416329 | 2.2338 | 2.2173 | 0.0184  |
| CEU | NPIP | 28421329 | 3.377  | 4.4346 | -0.6636 |
| CEU | NPIP | 28426329 | 2.4391 | 3.2407 | -0.6573 |
| CEU | NPIP | 28431329 | 1.0812 | 1.3645 | -0.4583 |
| CEU | NPIP | 28436329 | 0.6112 | 0.8528 | -0.5441 |
| CEU | NPIP | 28441329 | 0.415  | 0.8528 | -0.9859 |
| CEU | NPIP | 28446329 | 1.0012 | 2.2173 | -1.3586 |
| CEU | NPIP | 28451329 | 1.7864 | 3.5818 | -1.3532 |
| CEU | NPIP | 28456329 | 1.1901 | 2.0467 | -1.0193 |
| CEU | NPIP | 28461329 | 0.7285 | 1.5351 | -1.196  |
| CEU | NPIP | 28466329 | 0.9691 | 1.8762 | -1.1549 |
| CEU | NPIP | 28471329 | 0.309  | 0.6822 | -0.9745 |
| CEU | NPIP | 28476329 | 0.2226 | 0.8528 | -1.4192 |
| CEU | NPIP | 28481329 | 1.2519 | 2.3879 | -1.1963 |
| CEU | NPIP | 28486329 | 4.8233 | 4.7757 | 0.028   |
| CEU | NPIP | 28491329 | 6.7716 | 6.3108 | 0.2116  |
| CEU | NPIP | 28496329 | 4.7027 | 6.4814 | -0.7972 |
| CEU | NPIP | 28501329 | 3.9068 | 5.7991 | -0.9372 |
| CEU | NPIP | 28506329 | 7.3425 | 6.9931 | 0.1462  |

## 2\_TajimasD\_data

|     |      |          |         |         |         |
|-----|------|----------|---------|---------|---------|
| CEU | NPIP | 28511329 | 10.0092 | 8.8692  | 0.3836  |
| CEU | NPIP | 28516329 | 8.55    | 8.187   | 0.1315  |
| CEU | NPIP | 28521329 | 5.5428  | 6.1402  | -0.2811 |
| CEU | NPIP | 28526329 | 8.1635  | 7.6753  | 0.1877  |
| CEU | NPIP | 28531329 | 11.0443 | 8.8692  | 0.7319  |
| CEU | NPIP | 28536329 | 10.7379 | 8.5281  | 0.771   |
| CEU | NPIP | 28541329 | 9.0032  | 7.5047  | 0.5879  |
| CEU | NPIP | 28546329 | 4.8048  | 6.4814  | -0.7515 |
| CEU | NPIP | 28551329 | 5.7219  | 7.5047  | -0.6995 |
| CEU | NPIP | 28556329 | 7.1375  | 6.4814  | 0.2941  |
| CEU | NPIP | 28561329 | 8.726   | 6.6519  | 0.9081  |
| CEU | NPIP | 28566329 | 7.591   | 7.8459  | -0.096  |
| CEU | NPIP | 28571329 | 6.2983  | 8.0164  | -0.6346 |
| CEU | NPIP | 28576329 | 7.9074  | 7.1636  | 0.3045  |
| CEU | NPIP | 28581329 | 8.408   | 7.3342  | 0.4302  |
| CEU | NPIP | 28586329 | 9.719   | 8.8692  | 0.286   |
| CEU | NPIP | 28591329 | 9.0237  | 8.6987  | 0.1113  |
| CEU | NPIP | 28596329 | 6.2855  | 6.6519  | -0.1604 |
| CEU | NPIP | 28601329 | 6.8571  | 8.3576  | -0.5334 |
| CEU | NPIP | 28606329 | 11.5343 | 13.645  | -0.4743 |
| CEU | NPIP | 28611329 | 10.4014 | 11.0866 | -0.1873 |
| CEU | NPIP | 28616329 | 26.938  | 16.7151 | 1.8934  |
| CEU | NPIP | 28621329 | 25.9588 | 17.7385 | 1.4383  |
| CEU | NPIP | 28626329 | 8.5797  | 9.7221  | -0.353  |
| CEU | NPIP | 28631329 | 9.8914  | 9.5515  | 0.1068  |
| CEU | NPIP | 28636329 | 5.3781  | 6.3108  | -0.4282 |
| CEU | NPIP | 28641329 | 4.2948  | 6.3108  | -0.9256 |
| CEU | NPIP | 28646329 | 7.6417  | 9.8926  | -0.6844 |
| CEU | NPIP | 28651329 | 9.5902  | 10.5749 | -0.2813 |
| CEU | NPIP | 28656329 | 5.3105  | 5.458   | -0.0771 |
| CEU | NPIP | 28661329 | 0.6104  | 0.8528  | -0.5459 |
| CEU | NPIP | 28666329 | 0.0101  | 0.1706  | -0.9534 |
| CEU | NPIP | 28671329 | 0       | 0       | 0       |
| CEU | NPIP | 28676329 | 0.4937  | 0.3411  | 0.6117  |
| CEU | NPIP | 28681329 | 0.5904  | 0.5117  | 0.2468  |
| CEU | NPIP | 28686329 | 0.9625  | 0.5117  | 1.4138  |
| CEU | NPIP | 28691329 | 1.1868  | 0.6822  | 1.3177  |
| CEU | NPIP | 28696329 | 0.5368  | 1.1939  | -1.171  |
| CEU | NPIP | 28701329 | 1.9175  | 1.5351  | 0.567   |
| CEU | NPIP | 28706329 | 3.6819  | 2.729   | 0.9007  |
| CEU | NPIP | 28711329 | 2.1676  | 3.5818  | -1.0659 |
| CEU | NPIP | 28716329 | 0.1874  | 1.5351  | -1.9984 |
| CEU | NPIP | 28721329 | 0.503   | 0.6822  | -0.4679 |
| CEU | NPIP | 28726329 | 0.5813  | 0.8528  | -0.6114 |
| CEU | NPIP | 28731329 | 0.2325  | 0.8528  | -1.3969 |
| CEU | NPIP | 28736329 | 1.0284  | 1.3645  | -0.5437 |
| CEU | NPIP | 28741329 | 1.5613  | 1.5351  | 0.0388  |
| CEU | NPIP | 28746329 | 2.2841  | 3.5818  | -0.9781 |
| CEU | NPIP | 28751329 | 7.3022  | 7.1636  | 0.0567  |

## 2\_TajimasD\_data

|     |      |          |         |         |         |
|-----|------|----------|---------|---------|---------|
| CEU | NPIP | 28756329 | 5.952   | 4.7757  | 0.6918  |
| CEU | NPIP | 28761329 | 2.9101  | 2.729   | 0.1712  |
| CEU | NPIP | 28766329 | 3.4954  | 3.0701  | 0.3648  |
| CEU | NPIP | 28771329 | 1.395   | 1.0234  | 0.7384  |
| CEU | NPIP | 28776329 | 1.5403  | 1.0234  | 1.0271  |
| CEU | NPIP | 28781329 | 1.0462  | 0.8528  | 0.4355  |
| CEU | NPIP | 28786329 | 0.0689  | 0.1706  | -0.6041 |
| CEU | NPIP | 28791329 | 0       | 0       | 0       |
| CEU | NPIP | 28796329 | 1.0254  | 1.0234  | 0.004   |
| CEU | NPIP | 28801329 | 2.4133  | 2.3879  | 0.0267  |
| CEU | NPIP | 28806329 | 2.7429  | 2.5584  | 0.1838  |
| CEU | NPIP | 28811329 | 2.603   | 3.0701  | -0.4007 |
| CEU | NPIP | 28816329 | 2.3317  | 2.8996  | -0.5107 |
| CEU | NPIP | 28821329 | 7.3527  | 5.1169  | 1.2376  |
| CEU | NPIP | 28826329 | 8.9938  | 7.1636  | 0.7492  |
| CEU | NPIP | 28831329 | 7.2319  | 6.1402  | 0.5137  |
| CEU | NPIP | 28836329 | 9.3793  | 7.3342  | 0.8194  |
| CEU | NPIP | 28841329 | 9.5988  | 8.6987  | 0.3084  |
| CEU | NPIP | 28846329 | 8.5857  | 7.5047  | 0.4241  |
| CEU | NPIP | 28851329 | 6.6129  | 5.458   | 0.6038  |
| CEU | NPIP | 28856329 | 5.2123  | 5.1169  | 0.0528  |
| CEU | NPIP | 28861329 | 12.2488 | 9.2104  | 0.9873  |
| CEU | NPIP | 28866329 | 16.7883 | 10.916  | 1.6287  |
| CEU | NPIP | 28871329 | 13.9957 | 8.3576  | 2.0042  |
| CEU | NPIP | 28876329 | 8.4337  | 5.2874  | 1.6918  |
| CEU | NPIP | 28881329 | 5.0212  | 4.7757  | 0.1444  |
| CEU | NPIP | 28886329 | 5.8861  | 5.2874  | 0.3219  |
| CEU | NPIP | 28891329 | 7.3394  | 6.8225  | 0.2212  |
| CEU | NPIP | 28896329 | 7.5636  | 8.3576  | -0.2822 |
| CEU | NPIP | 28901329 | 6.1398  | 6.3108  | -0.0785 |
| CEU | NPIP | 28906329 | 5.6131  | 5.2874  | 0.1751  |
| CEU | NPIP | 28911329 | 4.2092  | 5.1169  | -0.5024 |
| CEU | NPIP | 28916329 | 5.1727  | 5.7991  | -0.3103 |
| CEU | NPIP | 28921329 | 5.706   | 6.8225  | -0.4777 |
| CEU | NPIP | 28926329 | 7.5088  | 7.1636  | 0.1413  |
| CEU | NPIP | 28931329 | 7.1119  | 6.3108  | 0.3678  |
| CEU | NPIP | 28936329 | 4.5733  | 5.9697  | -0.6739 |
| CEU | NPIP | 28941329 | 4.209   | 6.3108  | -0.965  |
| CEU | NPIP | 28946329 | 2.7238  | 5.2874  | -1.3785 |
| CEU | NPIP | 28951329 | 2.9872  | 4.9463  | -1.1173 |
| CEU | NPIP | 28956329 | 4.8654  | 6.3108  | -0.6636 |
| CEU | NPIP | 28961329 | 4.7273  | 6.1402  | -0.6649 |
| CEU | NPIP | 28966329 | 3.9942  | 6.3108  | -1.0636 |
| CHB | NPIP | 27961329 | 9.8449  | 9.8261  | 0.0057  |
| CHB | NPIP | 27966329 | 9.9634  | 9.6567  | 0.0951  |
| CHB | NPIP | 27971329 | 9.561   | 10.6731 | -0.3141 |
| CHB | NPIP | 27976329 | 10.8098 | 8.4708  | 0.8188  |
| CHB | NPIP | 27981329 | 11.7424 | 8.8096  | 0.9902  |
| CHB | NPIP | 27986329 | 11.1563 | 9.8261  | 0.4058  |

## 2\_TajimasD\_data

|     |      |          |         |         |         |
|-----|------|----------|---------|---------|---------|
| CHB | NPIP | 27991329 | 9.5233  | 8.4708  | 0.3685  |
| CHB | NPIP | 27996329 | 7.9985  | 9.3178  | -0.4229 |
| CHB | NPIP | 28001329 | 8.8926  | 11.012  | -0.5813 |
| CHB | NPIP | 28006329 | 6.7679  | 7.9625  | -0.4427 |
| CHB | NPIP | 28011329 | 6.5641  | 7.4543  | -0.3504 |
| CHB | NPIP | 28016329 | 9.0963  | 10.8426 | -0.486  |
| CHB | NPIP | 28021329 | 10.9524 | 13.045  | -0.4893 |
| CHB | NPIP | 28026329 | 7.3269  | 9.6567  | -0.7224 |
| CHB | NPIP | 28031329 | 4.0994  | 7.4543  | -1.3206 |
| CHB | NPIP | 28036329 | 4.5108  | 9.1484  | -1.512  |
| CHB | NPIP | 28041329 | 5.2439  | 8.1319  | -1.0497 |
| CHB | NPIP | 28046329 | 7.925   | 8.8096  | -0.2987 |
| CHB | NPIP | 28051329 | 10.4638 | 11.8591 | -0.357  |
| CHB | NPIP | 28056329 | 11.7903 | 12.0285 | -0.0601 |
| CHB | NPIP | 28061329 | 13.8138 | 10.8426 | 0.8269  |
| CHB | NPIP | 28066329 | 13.2387 | 11.3508 | 0.5033  |
| CHB | NPIP | 28071329 | 11.9872 | 12.0285 | -0.0104 |
| CHB | NPIP | 28076329 | 14.4511 | 13.045  | 0.3288  |
| CHB | NPIP | 28081329 | 17.7816 | 13.5532 | 0.9536  |
| CHB | NPIP | 28086329 | 14.5288 | 11.8591 | 0.683   |
| CHB | NPIP | 28091329 | 9.9126  | 11.6896 | -0.4608 |
| CHB | NPIP | 28096329 | 11.1078 | 13.7226 | -0.5828 |
| CHB | NPIP | 28101329 | 10.1739 | 13.5532 | -0.7621 |
| CHB | NPIP | 28106329 | 7.21    | 11.012  | -1.0429 |
| CHB | NPIP | 28111329 | 6.2875  | 9.6567  | -1.0447 |
| CHB | NPIP | 28116329 | 7.8711  | 9.3178  | -0.4637 |
| CHB | NPIP | 28121329 | 8.8547  | 8.8096  | 0.0152  |
| CHB | NPIP | 28126329 | 6.7449  | 8.979   | -0.7411 |
| CHB | NPIP | 28131329 | 5.1565  | 8.4708  | -1.1602 |
| CHB | NPIP | 28136329 | 6.355   | 8.3013  | -0.6941 |
| CHB | NPIP | 28141329 | 7.5361  | 8.4708  | -0.3272 |
| CHB | NPIP | 28146329 | 9.1953  | 9.9955  | -0.2403 |
| CHB | NPIP | 28151329 | 7.8125  | 9.6567  | -0.5718 |
| CHB | NPIP | 28156329 | 5.9933  | 8.6402  | -0.9098 |
| CHB | NPIP | 28161329 | 7.7795  | 9.8261  | -0.6244 |
| CHB | NPIP | 28166329 | 6.8063  | 9.4872  | -0.8451 |
| CHB | NPIP | 28171329 | 6.0249  | 8.1319  | -0.7658 |
| CHB | NPIP | 28176329 | 7.2749  | 8.6402  | -0.4693 |
| CHB | NPIP | 28181329 | 8.6735  | 11.6896 | -0.7822 |
| CHB | NPIP | 28186329 | 9.8508  | 13.5532 | -0.835  |
| CHB | NPIP | 28191329 | 7.1089  | 11.012  | -1.0706 |
| CHB | NPIP | 28196329 | 8.3959  | 9.6567  | -0.3909 |
| CHB | NPIP | 28201329 | 7.9446  | 9.3178  | -0.4402 |
| CHB | NPIP | 28206329 | 6.2496  | 8.979   | -0.9054 |
| CHB | NPIP | 28211329 | 6.3078  | 9.1484  | -0.9261 |
| CHB | NPIP | 28216329 | 7.0889  | 8.8096  | -0.581  |
| CHB | NPIP | 28221329 | 8.5191  | 9.9955  | -0.4433 |
| CHB | NPIP | 28226329 | 8.0263  | 9.8261  | -0.5491 |
| CHB | NPIP | 28231329 | 16.2002 | 13.7226 | 0.5522  |

## 2\_TajimasD\_data

|     |      |          |         |         |         |
|-----|------|----------|---------|---------|---------|
| CHB | NPIP | 28236329 | 19.6087 | 16.0944 | 0.673   |
| CHB | NPIP | 28241329 | 16.5338 | 14.9085 | 0.3348  |
| CHB | NPIP | 28246329 | 15.9763 | 15.2474 | 0.147   |
| CHB | NPIP | 28251329 | 13.8527 | 13.2144 | 0.1474  |
| CHB | NPIP | 28256329 | 11.9255 | 12.0285 | -0.026  |
| CHB | NPIP | 28261329 | 8.9812  | 11.3508 | -0.6317 |
| CHB | NPIP | 28266329 | 5.9429  | 10.8426 | -1.3636 |
| CHB | NPIP | 28271329 | 5.9977  | 10.3343 | -1.2623 |
| CHB | NPIP | 28276329 | 5.6097  | 9.4872  | -1.2223 |
| CHB | NPIP | 28281329 | 4.7444  | 9.6567  | -1.5232 |
| CHB | NPIP | 28286329 | 6.1259  | 9.4872  | -1.0596 |
| CHB | NPIP | 28291329 | 8.9792  | 9.6567  | -0.2101 |
| CHB | NPIP | 28296329 | 6.2275  | 7.6237  | -0.5384 |
| CHB | NPIP | 28301329 | 2.463   | 4.5742  | -1.2856 |
| CHB | NPIP | 28306329 | 4.3398  | 4.913   | -0.3279 |
| CHB | NPIP | 28311329 | 4.035   | 5.5907  | -0.7938 |
| CHB | NPIP | 28316329 | 3.2429  | 4.5742  | -0.8107 |
| CHB | NPIP | 28321329 | 4.2107  | 4.7436  | -0.3143 |
| CHB | NPIP | 28326329 | 5.8549  | 5.7601  | 0.0471  |
| CHB | NPIP | 28331329 | 7.158   | 6.7766  | 0.1637  |
| CHB | NPIP | 28336329 | 8.3874  | 6.946   | 0.605   |
| CHB | NPIP | 28341329 | 7.4243  | 6.6072  | 0.3589  |
| CHB | NPIP | 28346329 | 6.5951  | 8.1319  | -0.5586 |
| CHB | NPIP | 28351329 | 5.0689  | 6.2684  | -0.5524 |
| CHB | NPIP | 28356329 | 2.0259  | 2.8801  | -0.7702 |
| CHB | NPIP | 28361329 | 1.0786  | 1.5247  | -0.6627 |
| CHB | NPIP | 28366329 | 0.7116  | 0.5082  | 0.6385  |
| CHB | NPIP | 28371329 | 2.3686  | 2.5412  | -0.1724 |
| CHB | NPIP | 28376329 | 2.5793  | 3.0495  | -0.4044 |
| CHB | NPIP | 28381329 | 2.6419  | 2.033   | 0.7261  |
| CHB | NPIP | 28386329 | 3.695   | 2.8801  | 0.7347  |
| CHB | NPIP | 28391329 | 1.7559  | 2.033   | -0.3304 |
| CHB | NPIP | 28396329 | 1.1043  | 1.6942  | -0.8096 |
| CHB | NPIP | 28401329 | 1.4081  | 1.8636  | -0.5812 |
| CHB | NPIP | 28406329 | 0.3619  | 0.6777  | -0.8256 |
| CHB | NPIP | 28411329 | 0.5214  | 0.8471  | -0.7345 |
| CHB | NPIP | 28416329 | 1.8897  | 1.8636  | 0.0333  |
| CHB | NPIP | 28421329 | 3.5251  | 3.7271  | -0.1467 |
| CHB | NPIP | 28426329 | 2.8296  | 4.066   | -0.8337 |
| CHB | NPIP | 28431329 | 1.1209  | 2.8801  | -1.5861 |
| CHB | NPIP | 28436329 | 0.5936  | 1.6942  | -1.5104 |
| CHB | NPIP | 28441329 | 0.6556  | 1.3553  | -1.134  |
| CHB | NPIP | 28446329 | 0.6789  | 1.8636  | -1.5115 |
| CHB | NPIP | 28451329 | 0.7537  | 2.033   | -1.5256 |
| CHB | NPIP | 28456329 | 0.5656  | 1.1859  | -1.1072 |
| CHB | NPIP | 28461329 | 0.4721  | 1.6942  | -1.6772 |
| CHB | NPIP | 28466329 | 0.4915  | 1.8636  | -1.7506 |
| CHB | NPIP | 28471329 | 0.0291  | 0.3388  | -1.2423 |
| CHB | NPIP | 28476329 | 0.0388  | 0.5082  | -1.4735 |



## 2\_TajimasD\_data

|     |      |          |         |         |         |
|-----|------|----------|---------|---------|---------|
| CHB | NPIP | 28481329 | 1.335   | 4.4048  | -1.9317 |
| CHB | NPIP | 28486329 | 4.4319  | 8.8096  | -1.478  |
| CHB | NPIP | 28491329 | 5.9623  | 9.1484  | -1.0388 |
| CHB | NPIP | 28496329 | 4.1336  | 7.6237  | -1.3459 |
| CHB | NPIP | 28501329 | 3.3006  | 7.7931  | -1.6979 |
| CHB | NPIP | 28506329 | 6.1591  | 9.4872  | -1.0491 |
| CHB | NPIP | 28511329 | 8.2915  | 10.3343 | -0.5946 |
| CHB | NPIP | 28516329 | 8.2482  | 8.4708  | -0.0779 |
| CHB | NPIP | 28521329 | 6.5096  | 5.4213  | 0.5707  |
| CHB | NPIP | 28526329 | 7.3539  | 6.6072  | 0.328   |
| CHB | NPIP | 28531329 | 8.9328  | 8.1319  | 0.2911  |
| CHB | NPIP | 28536329 | 7.988   | 8.8096  | -0.2774 |
| CHB | NPIP | 28541329 | 7.2916  | 9.3178  | -0.6495 |
| CHB | NPIP | 28546329 | 4.9048  | 9.8261  | -1.5015 |
| CHB | NPIP | 28551329 | 4.9772  | 10.5037 | -1.5844 |
| CHB | NPIP | 28556329 | 6.1072  | 10.8426 | -1.3179 |
| CHB | NPIP | 28561329 | 7.3628  | 11.3508 | -1.0632 |
| CHB | NPIP | 28566329 | 6.08    | 9.9955  | -1.1758 |
| CHB | NPIP | 28571329 | 4.2144  | 9.6567  | -1.6875 |
| CHB | NPIP | 28576329 | 5.5599  | 9.8261  | -1.3016 |
| CHB | NPIP | 28581329 | 5.9022  | 8.979   | -1.0207 |
| CHB | NPIP | 28586329 | 5.6887  | 9.4872  | -1.1974 |
| CHB | NPIP | 28591329 | 5.4752  | 9.9955  | -1.3574 |
| CHB | NPIP | 28596329 | 4.0421  | 7.6237  | -1.3812 |
| CHB | NPIP | 28601329 | 5.1816  | 9.3178  | -1.3258 |
| CHB | NPIP | 28606329 | 8.6423  | 13.045  | -1.0295 |
| CHB | NPIP | 28611329 | 7.7379  | 10.1649 | -0.7175 |
| CHB | NPIP | 28616329 | 21.7847 | 17.1109 | 0.8441  |
| CHB | NPIP | 28621329 | 21.5054 | 18.6357 | 0.4775  |
| CHB | NPIP | 28626329 | 7.3161  | 11.1814 | -1.0451 |
| CHB | NPIP | 28631329 | 7.2693  | 11.6896 | -1.1463 |
| CHB | NPIP | 28636329 | 4.3678  | 9.4872  | -1.6137 |
| CHB | NPIP | 28641329 | 3.6787  | 10.1649 | -1.9174 |
| CHB | NPIP | 28646329 | 5.8363  | 12.5367 | -1.6267 |
| CHB | NPIP | 28651329 | 7.0948  | 11.5202 | -1.1635 |
| CHB | NPIP | 28656329 | 3.7386  | 5.7601  | -1.0043 |
| CHB | NPIP | 28661329 | 0.3897  | 0.3388  | 0.2042  |
| CHB | NPIP | 28666329 | 0       | 0       | 0       |
| CHB | NPIP | 28671329 | 0       | 0       | 0       |
| CHB | NPIP | 28676329 | 0.4523  | 0.5082  | -0.1755 |
| CHB | NPIP | 28681329 | 0.5344  | 0.6777  | -0.3746 |
| CHB | NPIP | 28686329 | 0.8195  | 0.6777  | 0.3707  |
| CHB | NPIP | 28691329 | 1.0251  | 1.3553  | -0.5352 |
| CHB | NPIP | 28696329 | 0.6379  | 1.6942  | -1.4496 |
| CHB | NPIP | 28701329 | 1.7721  | 1.5247  | 0.3675  |
| CHB | NPIP | 28706329 | 3.7556  | 3.0495  | 0.6072  |
| CHB | NPIP | 28711329 | 2.6425  | 4.066   | -0.9599 |
| CHB | NPIP | 28716329 | 0.3088  | 1.6942  | -1.9013 |
| CHB | NPIP | 28721329 | 0.558   | 0.5082  | 0.1563  |

## 2\_TajimasD\_data

|     |      |          |         |         |         |
|-----|------|----------|---------|---------|---------|
| CHB | NPIP | 28726329 | 0.558   | 0.5082  | 0.1563  |
| CHB | NPIP | 28731329 | 0.173   | 0.6777  | -1.3194 |
| CHB | NPIP | 28736329 | 0.5898  | 1.6942  | -1.5157 |
| CHB | NPIP | 28741329 | 1.0916  | 2.3718  | -1.3514 |
| CHB | NPIP | 28746329 | 1.5273  | 2.7106  | -1.1212 |
| CHB | NPIP | 28751329 | 5.8456  | 5.5907  | 0.1301  |
| CHB | NPIP | 28756329 | 5.5172  | 5.7601  | -0.1207 |
| CHB | NPIP | 28761329 | 2.6973  | 4.066   | -0.923  |
| CHB | NPIP | 28766329 | 3.1175  | 3.8965  | -0.5448 |
| CHB | NPIP | 28771329 | 1.4457  | 1.5247  | -0.1174 |
| CHB | NPIP | 28776329 | 1.4746  | 1.1859  | 0.5153  |
| CHB | NPIP | 28781329 | 1.0849  | 1.3553  | -0.4382 |
| CHB | NPIP | 28786329 | 0.1117  | 0.3388  | -0.911  |
| CHB | NPIP | 28791329 | 0       | 0       | 0       |
| CHB | NPIP | 28796329 | 0.9701  | 1.0165  | -0.0923 |
| CHB | NPIP | 28801329 | 2.5563  | 2.2024  | 0.3963  |
| CHB | NPIP | 28806329 | 2.6252  | 2.3718  | 0.2675  |
| CHB | NPIP | 28811329 | 2.7007  | 3.3883  | -0.5415 |
| CHB | NPIP | 28816329 | 2.8252  | 4.066   | -0.8367 |
| CHB | NPIP | 28821329 | 6.0721  | 7.7931  | -0.6504 |
| CHB | NPIP | 28826329 | 6.775   | 10.1649 | -1.0021 |
| CHB | NPIP | 28831329 | 4.9488  | 8.4708  | -1.233  |
| CHB | NPIP | 28836329 | 6.6861  | 9.9955  | -0.9938 |
| CHB | NPIP | 28841329 | 7.1601  | 11.3508 | -1.1172 |
| CHB | NPIP | 28846329 | 6.7434  | 10.5037 | -1.0781 |
| CHB | NPIP | 28851329 | 4.902   | 8.3013  | -1.2123 |
| CHB | NPIP | 28856329 | 3.9303  | 6.4378  | -1.1275 |
| CHB | NPIP | 28861329 | 9.6269  | 10.5037 | -0.2514 |
| CHB | NPIP | 28866329 | 12.2157 | 11.3508 | 0.2306  |
| CHB | NPIP | 28871329 | 10.2168 | 8.979   | 0.4106  |
| CHB | NPIP | 28876329 | 6.6343  | 6.7766  | -0.0611 |
| CHB | NPIP | 28881329 | 3.6821  | 5.4213  | -0.912  |
| CHB | NPIP | 28886329 | 5.0147  | 8.6402  | -1.2462 |
| CHB | NPIP | 28891329 | 5.885   | 8.3013  | -0.8618 |
| CHB | NPIP | 28896329 | 5.272   | 6.7766  | -0.6459 |
| CHB | NPIP | 28901329 | 5.2145  | 8.1319  | -1.0604 |
| CHB | NPIP | 28906329 | 5.3564  | 7.6237  | -0.8743 |
| CHB | NPIP | 28911329 | 4.4245  | 8.1319  | -1.3475 |
| CHB | NPIP | 28916329 | 4.4691  | 8.8096  | -1.4655 |
| CHB | NPIP | 28921329 | 4.0929  | 8.6402  | -1.5631 |
| CHB | NPIP | 28926329 | 6.5648  | 8.8096  | -0.7579 |
| CHB | NPIP | 28931329 | 6.617   | 6.4378  | 0.0806  |
| CHB | NPIP | 28936329 | 4.3033  | 6.0989  | -0.8476 |
| CHB | NPIP | 28941329 | 4.6707  | 6.6072  | -0.8505 |
| CHB | NPIP | 28946329 | 3.3404  | 5.7601  | -1.2022 |
| CHB | NPIP | 28951329 | 3.831   | 6.0989  | -1.0705 |
| CHB | NPIP | 28956329 | 6.7082  | 7.4543  | -0.2937 |
| CHB | NPIP | 28961329 | 7.114   | 6.946   | 0.0705  |
| CHB | NPIP | 28966329 | 6.676   | 6.7766  | -0.0432 |

## 2\_TajimasD\_data

|     |      |          |         |         |         |
|-----|------|----------|---------|---------|---------|
| YRI | NPIP | 27961329 | 13.1343 | 13.2769 | -0.0327 |
| YRI | NPIP | 27966329 | 10.1647 | 12.1005 | -0.4843 |
| YRI | NPIP | 27971329 | 10.6363 | 14.1172 | -0.7527 |
| YRI | NPIP | 27976329 | 10.9939 | 14.2853 | -0.7037 |
| YRI | NPIP | 27981329 | 11.3486 | 14.9575 | -0.7386 |
| YRI | NPIP | 27986329 | 14.3253 | 15.9659 | -0.3155 |
| YRI | NPIP | 27991329 | 15.2222 | 15.4617 | -0.0475 |
| YRI | NPIP | 27996329 | 14.7308 | 15.6298 | -0.1764 |
| YRI | NPIP | 28001329 | 18.4514 | 17.8146 | 0.1103  |
| YRI | NPIP | 28006329 | 15.4368 | 15.1256 | 0.063   |
| YRI | NPIP | 28011329 | 10.6374 | 12.1005 | -0.366  |
| YRI | NPIP | 28016329 | 11.2072 | 13.445  | -0.5068 |
| YRI | NPIP | 28021329 | 12.9557 | 15.1256 | -0.4394 |
| YRI | NPIP | 28026329 | 9.3772  | 13.1089 | -0.8656 |
| YRI | NPIP | 28031329 | 7.0912  | 11.0921 | -1.0863 |
| YRI | NPIP | 28036329 | 7.0975  | 12.2685 | -1.277  |
| YRI | NPIP | 28041329 | 7.1353  | 12.4366 | -1.2924 |
| YRI | NPIP | 28046329 | 9.2378  | 13.1089 | -0.898  |
| YRI | NPIP | 28051329 | 9.7353  | 16.4701 | -1.2573 |
| YRI | NPIP | 28056329 | 10.0185 | 16.302  | -1.1846 |
| YRI | NPIP | 28061329 | 11.9832 | 12.7727 | -0.1877 |
| YRI | NPIP | 28066329 | 14.6825 | 15.7978 | -0.2167 |
| YRI | NPIP | 28071329 | 14.4525 | 15.9659 | -0.291  |
| YRI | NPIP | 28076329 | 15.338  | 13.613  | 0.3861  |
| YRI | NPIP | 28081329 | 19.6835 | 17.8146 | 0.3236  |
| YRI | NPIP | 28086329 | 17.7411 | 18.4868 | -0.1246 |
| YRI | NPIP | 28091329 | 13.4131 | 15.1256 | -0.3468 |
| YRI | NPIP | 28096329 | 13.9456 | 14.6214 | -0.1413 |
| YRI | NPIP | 28101329 | 11.7996 | 14.9575 | -0.6463 |
| YRI | NPIP | 28106329 | 8.2535  | 12.4366 | -1.0198 |
| YRI | NPIP | 28111329 | 7.3253  | 12.7727 | -1.295  |
| YRI | NPIP | 28116329 | 8.7166  | 13.613  | -1.0959 |
| YRI | NPIP | 28121329 | 9.1732  | 11.7644 | -0.6657 |
| YRI | NPIP | 28126329 | 7.1569  | 11.0921 | -1.0684 |
| YRI | NPIP | 28131329 | 6.4305  | 9.5795  | -0.9804 |
| YRI | NPIP | 28136329 | 7.7316  | 9.5795  | -0.5753 |
| YRI | NPIP | 28141329 | 8.851   | 12.1005 | -0.813  |
| YRI | NPIP | 28146329 | 10.1811 | 13.613  | -0.7681 |
| YRI | NPIP | 28151329 | 8.8191  | 11.5963 | -0.7232 |
| YRI | NPIP | 28156329 | 7.6297  | 12.1005 | -1.1185 |
| YRI | NPIP | 28161329 | 8.7456  | 13.1089 | -1.0121 |
| YRI | NPIP | 28166329 | 7.3533  | 11.4282 | -1.0758 |
| YRI | NPIP | 28171329 | 7.1961  | 11.7644 | -1.1736 |
| YRI | NPIP | 28176329 | 7.8106  | 11.9324 | -1.0449 |
| YRI | NPIP | 28181329 | 9.4131  | 13.9492 | -0.992  |
| YRI | NPIP | 28186329 | 9.4795  | 13.9492 | -0.9775 |
| YRI | NPIP | 28191329 | 6.9442  | 10.4199 | -1.0005 |
| YRI | NPIP | 28196329 | 9.7967  | 10.5879 | -0.2244 |
| YRI | NPIP | 28201329 | 9.3133  | 10.756  | -0.4032 |

## 2\_TajimasD\_data

|     |      |          |         |         |         |
|-----|------|----------|---------|---------|---------|
| YRI | NPIP | 28206329 | 8.1767  | 10.924  | -0.7567 |
| YRI | NPIP | 28211329 | 8.3888  | 10.924  | -0.6982 |
| YRI | NPIP | 28216329 | 8.6919  | 11.7644 | -0.7893 |
| YRI | NPIP | 28221329 | 10.5228 | 12.6047 | -0.5012 |
| YRI | NPIP | 28226329 | 10.382  | 11.9324 | -0.393  |
| YRI | NPIP | 28231329 | 15.999  | 15.9659 | 0.0064  |
| YRI | NPIP | 28236329 | 16.8088 | 18.3188 | -0.2546 |
| YRI | NPIP | 28241329 | 15.0601 | 17.1423 | -0.3741 |
| YRI | NPIP | 28246329 | 18.9214 | 16.9743 | 0.3531  |
| YRI | NPIP | 28251329 | 19.6425 | 15.9659 | 0.7071  |
| YRI | NPIP | 28256329 | 17.7985 | 15.9659 | 0.3524  |
| YRI | NPIP | 28261329 | 15.9733 | 15.4617 | 0.1014  |
| YRI | NPIP | 28266329 | 13.3386 | 12.7727 | 0.1345  |
| YRI | NPIP | 28271329 | 11.3213 | 12.4366 | -0.2719 |
| YRI | NPIP | 28276329 | 10.3448 | 14.6214 | -0.8944 |
| YRI | NPIP | 28281329 | 9.069   | 15.9659 | -1.3264 |
| YRI | NPIP | 28286329 | 7.5681  | 14.1172 | -1.4161 |
| YRI | NPIP | 28291329 | 9.8345  | 14.4534 | -0.9766 |
| YRI | NPIP | 28296329 | 10.2456 | 13.7811 | -0.7822 |
| YRI | NPIP | 28301329 | 5.8551  | 8.067   | -0.8071 |
| YRI | NPIP | 28306329 | 5.5138  | 7.8989  | -0.8873 |
| YRI | NPIP | 28311329 | 5.4798  | 9.7476  | -1.3074 |
| YRI | NPIP | 28316329 | 3.3213  | 8.235   | -1.7594 |
| YRI | NPIP | 28321329 | 4.3388  | 9.2434  | -1.5784 |
| YRI | NPIP | 28326329 | 5.4061  | 8.9073  | -1.1661 |
| YRI | NPIP | 28331329 | 7.1756  | 9.0754  | -0.6219 |
| YRI | NPIP | 28336329 | 10.0948 | 10.756  | -0.1848 |
| YRI | NPIP | 28341329 | 8.3371  | 10.0837 | -0.5184 |
| YRI | NPIP | 28346329 | 8.5478  | 12.4366 | -0.9481 |
| YRI | NPIP | 28351329 | 6.8818  | 9.5795  | -0.8399 |
| YRI | NPIP | 28356329 | 1.7751  | 3.1932  | -1.1695 |
| YRI | NPIP | 28361329 | 0.4661  | 1.6806  | -1.6708 |
| YRI | NPIP | 28366329 | 0.5184  | 1.6806  | -1.5988 |
| YRI | NPIP | 28371329 | 2.2381  | 4.0335  | -1.2148 |
| YRI | NPIP | 28376329 | 2.8089  | 4.2016  | -0.9098 |
| YRI | NPIP | 28381329 | 3.7574  | 4.7057  | -0.5614 |
| YRI | NPIP | 28386329 | 4.711   | 6.3864  | -0.7562 |
| YRI | NPIP | 28391329 | 2.1724  | 3.8654  | -1.1881 |
| YRI | NPIP | 28396329 | 1.7935  | 2.1848  | -0.4393 |
| YRI | NPIP | 28401329 | 2.4592  | 2.0167  | 0.5291  |
| YRI | NPIP | 28406329 | 1.0482  | 0.8403  | 0.4696  |
| YRI | NPIP | 28411329 | 0.5309  | 0.6722  | -0.3699 |
| YRI | NPIP | 28416329 | 1.6981  | 1.8487  | -0.1926 |
| YRI | NPIP | 28421329 | 3.5808  | 4.8738  | -0.7422 |
| YRI | NPIP | 28426329 | 3.2484  | 5.0419  | -0.9993 |
| YRI | NPIP | 28431329 | 1.7701  | 2.1848  | -0.4656 |
| YRI | NPIP | 28436329 | 1.1274  | 1.3445  | -0.3526 |
| YRI | NPIP | 28441329 | 1.3208  | 1.8487  | -0.6752 |
| YRI | NPIP | 28446329 | 1.0198  | 1.6806  | -0.9091 |

## 2\_TajimasD\_data

|     |      |          |         |         |         |
|-----|------|----------|---------|---------|---------|
| YRI | NPIP | 28451329 | 0.7058  | 3.1932  | -2.0514 |
| YRI | NPIP | 28456329 | 0.6687  | 2.689   | -1.92   |
| YRI | NPIP | 28461329 | 1.6311  | 2.1848  | -0.6217 |
| YRI | NPIP | 28466329 | 1.6678  | 2.3529  | -0.7252 |
| YRI | NPIP | 28471329 | 0.2919  | 0.8403  | -1.2386 |
| YRI | NPIP | 28476329 | 0.3097  | 0.8403  | -1.1984 |
| YRI | NPIP | 28481329 | 1.3359  | 4.8738  | -2.0309 |
| YRI | NPIP | 28486329 | 5.0235  | 11.0921 | -1.6477 |
| YRI | NPIP | 28491329 | 6.5777  | 10.924  | -1.1971 |
| YRI | NPIP | 28496329 | 4.4643  | 9.0754  | -1.5094 |
| YRI | NPIP | 28501329 | 5.8289  | 10.756  | -1.3769 |
| YRI | NPIP | 28506329 | 11.0227 | 13.7811 | -0.6102 |
| YRI | NPIP | 28511329 | 10.0504 | 15.7978 | -1.1165 |
| YRI | NPIP | 28516329 | 7.5052  | 14.7895 | -1.5069 |
| YRI | NPIP | 28521329 | 6.5964  | 12.6047 | -1.4464 |
| YRI | NPIP | 28526329 | 7.366   | 12.7727 | -1.2854 |
| YRI | NPIP | 28531329 | 9.3833  | 13.1089 | -0.8642 |
| YRI | NPIP | 28536329 | 9.6643  | 13.7811 | -0.9108 |
| YRI | NPIP | 28541329 | 8.3572  | 13.1089 | -1.1022 |
| YRI | NPIP | 28546329 | 4.9685  | 9.4115  | -1.4062 |
| YRI | NPIP | 28551329 | 5.5575  | 9.7476  | -1.2836 |
| YRI | NPIP | 28556329 | 7.6358  | 12.2685 | -1.144  |
| YRI | NPIP | 28561329 | 8.7811  | 11.7644 | -0.7664 |
| YRI | NPIP | 28566329 | 6.7216  | 10.924  | -1.1574 |
| YRI | NPIP | 28571329 | 6.3712  | 13.7811 | -1.6393 |
| YRI | NPIP | 28576329 | 7.503   | 12.6047 | -1.2281 |
| YRI | NPIP | 28581329 | 7.4148  | 9.7476  | -0.7146 |
| YRI | NPIP | 28586329 | 8.1231  | 10.0837 | -0.5819 |
| YRI | NPIP | 28591329 | 7.2188  | 12.1005 | -1.2213 |
| YRI | NPIP | 28596329 | 6.2702  | 12.6047 | -1.5249 |
| YRI | NPIP | 28601329 | 7.4318  | 14.4534 | -1.4847 |
| YRI | NPIP | 28606329 | 12.0901 | 20.3355 | -1.2572 |
| YRI | NPIP | 28611329 | 12.7558 | 16.302  | -0.6685 |
| YRI | NPIP | 28616329 | 24.0146 | 21.0078 | 0.4443  |
| YRI | NPIP | 28621329 | 25.1151 | 21.68   | 0.4924  |
| YRI | NPIP | 28626329 | 15.3518 | 13.2769 | 0.4755  |
| YRI | NPIP | 28631329 | 14.5775 | 12.2685 | 0.5702  |
| YRI | NPIP | 28636329 | 7.6694  | 8.4031  | -0.2579 |
| YRI | NPIP | 28641329 | 6.6848  | 12.1005 | -1.3549 |
| YRI | NPIP | 28646329 | 10.5852 | 16.6382 | -1.1191 |
| YRI | NPIP | 28651329 | 12.8823 | 16.134  | -0.6191 |
| YRI | NPIP | 28656329 | 6.978   | 8.5712  | -0.5498 |
| YRI | NPIP | 28661329 | 0.2193  | 1.0084  | -1.5732 |
| YRI | NPIP | 28666329 | 0.1281  | 0.6722  | -1.4244 |
| YRI | NPIP | 28671329 | 0.0276  | 0.3361  | -1.2385 |
| YRI | NPIP | 28676329 | 0.6851  | 1.3445  | -1.071  |
| YRI | NPIP | 28681329 | 0.7944  | 1.1764  | -0.6832 |
| YRI | NPIP | 28686329 | 0.864   | 0.8403  | 0.0535  |
| YRI | NPIP | 28691329 | 1.7326  | 1.5126  | 0.3276  |

## 2\_TajimasD\_data

|     |      |          |         |         |         |
|-----|------|----------|---------|---------|---------|
| YRI | NPIP | 28696329 | 2.0501  | 1.5126  | 0.8004  |
| YRI | NPIP | 28701329 | 2.1043  | 1.5126  | 0.8811  |
| YRI | NPIP | 28706329 | 3.393   | 3.3612  | 0.0251  |
| YRI | NPIP | 28711329 | 4.8626  | 4.5377  | 0.1985  |
| YRI | NPIP | 28716329 | 2.5292  | 2.0167  | 0.6128  |
| YRI | NPIP | 28721329 | 0.5644  | 0.3361  | 0.9165  |
| YRI | NPIP | 28726329 | 0.5916  | 0.5042  | 0.2747  |
| YRI | NPIP | 28731329 | 0.055   | 0.6722  | -1.6158 |
| YRI | NPIP | 28736329 | 0.7476  | 2.0167  | -1.5174 |
| YRI | NPIP | 28741329 | 2.1235  | 3.0251  | -0.7778 |
| YRI | NPIP | 28746329 | 3.4372  | 5.378   | -1.0214 |
| YRI | NPIP | 28751329 | 6.6827  | 8.235   | -0.5558 |
| YRI | NPIP | 28756329 | 6.4666  | 6.3864  | 0.0362  |
| YRI | NPIP | 28761329 | 3.9355  | 5.0419  | -0.6165 |
| YRI | NPIP | 28766329 | 3.1284  | 4.2016  | -0.701  |
| YRI | NPIP | 28771329 | 1.7127  | 1.5126  | 0.298   |
| YRI | NPIP | 28776329 | 2.2497  | 1.8487  | 0.5129  |
| YRI | NPIP | 28781329 | 2.0869  | 1.8487  | 0.3047  |
| YRI | NPIP | 28786329 | 0.5395  | 0.3361  | 0.8166  |
| YRI | NPIP | 28791329 | 0       | 0       | 0       |
| YRI | NPIP | 28796329 | 0.9656  | 0.8403  | 0.283   |
| YRI | NPIP | 28801329 | 2.7855  | 2.1848  | 0.6745  |
| YRI | NPIP | 28806329 | 2.9513  | 3.0251  | -0.0637 |
| YRI | NPIP | 28811329 | 3.4735  | 4.2016  | -0.4756 |
| YRI | NPIP | 28816329 | 3.3931  | 4.2016  | -0.5281 |
| YRI | NPIP | 28821329 | 6.2353  | 9.2434  | -0.9681 |
| YRI | NPIP | 28826329 | 8.1216  | 11.9324 | -0.966  |
| YRI | NPIP | 28831329 | 7.1936  | 9.0754  | -0.616  |
| YRI | NPIP | 28836329 | 7.1056  | 9.9157  | -0.8472 |
| YRI | NPIP | 28841329 | 6.8538  | 10.0837 | -0.9587 |
| YRI | NPIP | 28846329 | 7.1564  | 9.4115  | -0.7137 |
| YRI | NPIP | 28851329 | 6.8142  | 9.0754  | -0.7402 |
| YRI | NPIP | 28856329 | 7.3215  | 8.4031  | -0.3801 |
| YRI | NPIP | 28861329 | 11.4001 | 10.756  | 0.18    |
| YRI | NPIP | 28866329 | 11.875  | 12.9408 | -0.2503 |
| YRI | NPIP | 28871329 | 10.3635 | 11.2602 | -0.24   |
| YRI | NPIP | 28876329 | 7.4776  | 7.7309  | -0.0961 |
| YRI | NPIP | 28881329 | 4.0252  | 6.0502  | -0.9595 |
| YRI | NPIP | 28886329 | 5.5179  | 6.5544  | -0.457  |
| YRI | NPIP | 28891329 | 7.0942  | 8.4031  | -0.46   |
| YRI | NPIP | 28896329 | 7.0644  | 8.9073  | -0.6138 |
| YRI | NPIP | 28901329 | 5.9285  | 7.7309  | -0.6839 |
| YRI | NPIP | 28906329 | 6.4117  | 9.4115  | -0.9494 |
| YRI | NPIP | 28911329 | 5.182   | 9.5795  | -1.3691 |
| YRI | NPIP | 28916329 | 4.4482  | 8.7392  | -1.4545 |
| YRI | NPIP | 28921329 | 4.3671  | 8.7392  | -1.482  |
| YRI | NPIP | 28926329 | 7.4733  | 9.4115  | -0.6134 |
| YRI | NPIP | 28931329 | 8.2585  | 8.4031  | -0.0508 |
| YRI | NPIP | 28936329 | 5.5429  | 7.2267  | -0.6794 |

## 2\_TajimasD\_data

|     |      |          |         |         |         |
|-----|------|----------|---------|---------|---------|
| YRI | NPIP | 28941329 | 5.1962  | 8.067   | -1.0476 |
| YRI | NPIP | 28946329 | 3.5608  | 8.235   | -1.6736 |
| YRI | NPIP | 28951329 | 3.7705  | 7.2267  | -1.3946 |
| YRI | NPIP | 28956329 | 7.8964  | 10.2518 | -0.6884 |
| YRI | NPIP | 28961329 | 8.3101  | 11.7644 | -0.8874 |
| YRI | NPIP | 28966329 | 7.5849  | 10.5879 | -0.8516 |
| CEU | NPIP | 28142891 | 2.9841  | 5.2874  | -1.2385 |
| CEU | NPIP | 28147891 | 5.4622  | 5.7991  | -0.1669 |
| CEU | NPIP | 28152891 | 4.6275  | 5.7991  | -0.5803 |
| CEU | NPIP | 28157891 | 1.7017  | 3.9229  | -1.5492 |
| CEU | NPIP | 28162891 | 2.5203  | 3.7524  | -0.8926 |
| CEU | NPIP | 28167891 | 3.9755  | 4.9463  | -0.5536 |
| CEU | NPIP | 28172891 | 4.8477  | 6.3108  | -0.6717 |
| CEU | NPIP | 28177891 | 4.7807  | 6.6519  | -0.8192 |
| CEU | NPIP | 28182891 | 2.8268  | 5.7991  | -1.4722 |
| CEU | NPIP | 28187891 | 2.6395  | 5.7991  | -1.5649 |
| CEU | NPIP | 28192891 | 2.9796  | 5.2874  | -1.2409 |
| CEU | NPIP | 28197891 | 5.4253  | 6.4814  | -0.4734 |
| CEU | NPIP | 28202891 | 5.4277  | 7.6753  | -0.8639 |
| CEU | NPIP | 28207891 | 3.8736  | 6.8225  | -1.2618 |
| CEU | NPIP | 28212891 | 5.7852  | 7.1636  | -0.5642 |
| CEU | NPIP | 28217891 | 4.7281  | 6.4814  | -0.7859 |
| CEU | NPIP | 28222891 | 4.1946  | 5.7991  | -0.7947 |
| CEU | NPIP | 28227891 | 5.4736  | 6.9931  | -0.6358 |
| CEU | NPIP | 28232891 | 6.3412  | 7.6753  | -0.5128 |
| CEU | NPIP | 28237891 | 6.245   | 7.6753  | -0.5498 |
| CEU | NPIP | 28242891 | 8.6155  | 9.2104  | -0.1933 |
| CEU | NPIP | 28247891 | 11.589  | 12.1099 | -0.131  |
| CEU | NPIP | 28252891 | 10.3308 | 10.916  | -0.1623 |
| CEU | NPIP | 28257891 | 9.7721  | 8.6987  | 0.3677  |
| CEU | NPIP | 28262891 | 10.1802 | 9.2104  | 0.3151  |
| CEU | NPIP | 28267891 | 8.3311  | 7.8459  | 0.1828  |
| CEU | NPIP | 28272891 | 5.7889  | 6.8225  | -0.4423 |
| CEU | NPIP | 28277891 | 5.0643  | 8.187   | -1.1313 |
| CEU | NPIP | 28282891 | 5.3069  | 8.3576  | -1.0844 |
| CEU | NPIP | 28287891 | 7.4088  | 8.3576  | -0.3373 |
| CEU | NPIP | 28292891 | 9.3606  | 7.8459  | 0.5706  |
| CEU | NPIP | 28297891 | 7.7049  | 7.3342  | 0.1485  |
| CEU | NPIP | 28302891 | 4.604   | 6.4814  | -0.8415 |
| CEU | NPIP | 28307891 | 3.3581  | 4.9463  | -0.9057 |
| CEU | NPIP | 28312891 | 2.3751  | 3.4112  | -0.8138 |
| CEU | NPIP | 28317891 | 2.1605  | 3.9229  | -1.2292 |
| CEU | NPIP | 28322891 | 4.6118  | 6.1402  | -0.7192 |
| CEU | NPIP | 28327891 | 4.8724  | 6.3108  | -0.6604 |
| CEU | NPIP | 28332891 | 6.3598  | 6.6519  | -0.1279 |
| CEU | NPIP | 28337891 | 8.3891  | 8.3576  | 0.0112  |
| CEU | NPIP | 28342891 | 6.4708  | 7.6753  | -0.463  |
| CEU | NPIP | 28347891 | 5.6524  | 5.7991  | -0.0727 |
| CEU | NPIP | 28352891 | 4.5059  | 4.7757  | -0.1587 |

## 2\_TajimasD\_data

|     |      |          |         |        |         |
|-----|------|----------|---------|--------|---------|
| CEU | NPIP | 28357891 | 2.3643  | 2.5584 | -0.1934 |
| CEU | NPIP | 28362891 | 0.9068  | 0.8528 | 0.1216  |
| CEU | NPIP | 28367891 | 0.6289  | 0.6822 | -0.1392 |
| CEU | NPIP | 28372891 | 2.6761  | 2.2173 | 0.5126  |
| CEU | NPIP | 28377891 | 2.9464  | 2.729  | 0.2055  |
| CEU | NPIP | 28382891 | 3.4137  | 4.2641 | -0.552  |
| CEU | NPIP | 28387891 | 4.0171  | 4.9463 | -0.5299 |
| CEU | NPIP | 28392891 | 1.7386  | 2.2173 | -0.5348 |
| CEU | NPIP | 28397891 | 0.7326  | 1.1939 | -0.822  |
| CEU | NPIP | 28402891 | 0.9571  | 1.5351 | -0.8571 |
| CEU | NPIP | 28407891 | 0.4605  | 0.6822 | -0.5789 |
| CEU | NPIP | 28412891 | 1.7753  | 2.0467 | -0.3229 |
| CEU | NPIP | 28417891 | 3.2507  | 2.8996 | 0.3158  |
| CEU | NPIP | 28422891 | 2.8874  | 3.2407 | -0.2897 |
| CEU | NPIP | 28427891 | 1.4222  | 2.5584 | -1.1318 |
| CEU | NPIP | 28432891 | 0.6112  | 0.8528 | -0.5441 |
| CEU | NPIP | 28437891 | 0.6213  | 1.0234 | -0.799  |
| CEU | NPIP | 28442891 | 0.4251  | 1.0234 | -1.1889 |
| CEU | NPIP | 28447891 | 1.0113  | 2.3879 | -1.4497 |
| CEU | NPIP | 28452891 | 1.7763  | 3.4112 | -1.2841 |
| CEU | NPIP | 28457891 | 1.1699  | 1.7056 | -0.7337 |
| CEU | NPIP | 28462891 | 0.7285  | 1.5351 | -1.196  |
| CEU | NPIP | 28467891 | 0.9691  | 1.8762 | -1.1549 |
| CEU | NPIP | 28472891 | 0.3292  | 0.8528 | -1.1791 |
| CEU | NPIP | 28477891 | 0.2529  | 1.3645 | -1.7983 |
| CEU | NPIP | 28482891 | 2.6421  | 2.8996 | -0.2316 |
| CEU | NPIP | 28487891 | 5.8046  | 5.2874 | 0.2781  |
| CEU | NPIP | 28492891 | 5.8398  | 6.1402 | -0.1414 |
| CEU | NPIP | 28497891 | 4.7934  | 6.4814 | -0.7566 |
| CEU | NPIP | 28502891 | 4.6254  | 6.1402 | -0.7128 |
| CEU | NPIP | 28507891 | 7.7385  | 6.8225 | 0.392   |
| CEU | NPIP | 28512891 | 10.2495 | 9.3809 | 0.2775  |
| CEU | NPIP | 28517891 | 7.4675  | 8.0164 | -0.2027 |
| CEU | NPIP | 28522891 | 6.0771  | 6.3108 | -0.1073 |
| CEU | NPIP | 28527891 | 8.7957  | 8.3576 | 0.1557  |
| CEU | NPIP | 28532891 | 10.3539 | 8.8692 | 0.4996  |
| CEU | NPIP | 28537891 | 11.2128 | 8.5281 | 0.9367  |
| CEU | NPIP | 28542891 | 8.0316  | 6.9931 | 0.4345  |
| CEU | NPIP | 28547891 | 3.9433  | 5.9697 | -0.978  |
| CEU | NPIP | 28552891 | 5.8724  | 6.8225 | -0.4065 |
| CEU | NPIP | 28557891 | 8.5922  | 7.6753 | 0.3524  |
| CEU | NPIP | 28562891 | 8.845   | 7.8459 | 0.3764  |
| CEU | NPIP | 28567891 | 6.0928  | 6.6519 | -0.2448 |
| CEU | NPIP | 28572891 | 5.9759  | 7.1636 | -0.4862 |
| CEU | NPIP | 28577891 | 8.7419  | 8.0164 | 0.268   |
| CEU | NPIP | 28582891 | 9.268   | 8.5281 | 0.2582  |
| CEU | NPIP | 28587891 | 8.6444  | 8.0164 | 0.232   |
| CEU | NPIP | 28592891 | 8.1635  | 7.3342 | 0.3323  |
| CEU | NPIP | 28597891 | 5.9973  | 6.3108 | -0.1439 |



## 2\_TajimasD\_data

|     |      |          |         |         |         |
|-----|------|----------|---------|---------|---------|
| CEU | NPIP | 28602891 | 9.4587  | 10.4043 | -0.2743 |
| CEU | NPIP | 28607891 | 11.4548 | 13.4744 | -0.4593 |
| CEU | NPIP | 28612891 | 14.9307 | 12.2805 | 0.658   |
| CEU | NPIP | 28617891 | 27.6819 | 18.4207 | 1.5627  |
| CEU | NPIP | 28622891 | 21.0076 | 15.8623 | 1.0019  |
| CEU | NPIP | 28627891 | 11.3117 | 10.2337 | 0.3176  |
| CEU | NPIP | 28632891 | 7.6625  | 8.5281  | -0.302  |
| CEU | NPIP | 28637891 | 2.0006  | 4.2641  | -1.4693 |
| CEU | NPIP | 28642891 | 4.6568  | 6.9931  | -0.9775 |
| CEU | NPIP | 28647891 | 9.6368  | 11.2571 | -0.4366 |
| CEU | NPIP | 28652891 | 9.6106  | 9.5515  | 0.0186  |
| CEU | NPIP | 28657891 | 3.2068  | 3.5818  | -0.2826 |
| CEU | NPIP | 28662891 | 0.0202  | 0.3411  | -1.2864 |
| CEU | NPIP | 28667891 | 0.0101  | 0.1706  | -0.9534 |
| CEU | NPIP | 28672891 | 0.3795  | 0.1706  | 1.2409  |
| CEU | NPIP | 28677891 | 0.4937  | 0.3411  | 0.6117  |
| CEU | NPIP | 28682891 | 0.6155  | 0.5117  | 0.3255  |
| CEU | NPIP | 28687891 | 0.9625  | 0.5117  | 1.4138  |
| CEU | NPIP | 28692891 | 0.8023  | 0.6822  | 0.3136  |
| CEU | NPIP | 28697891 | 0.5368  | 1.1939  | -1.171  |
| CEU | NPIP | 28702891 | 1.9577  | 1.8762  | 0.1038  |
| CEU | NPIP | 28707891 | 3.7324  | 3.5818  | 0.1135  |
| CEU | NPIP | 28712891 | 2.1072  | 3.0701  | -0.826  |
| CEU | NPIP | 28717891 | 0.1369  | 0.6822  | -1.4239 |
| CEU | NPIP | 28722891 | 0.5813  | 0.8528  | -0.6114 |
| CEU | NPIP | 28727891 | 0.5813  | 0.8528  | -0.6114 |
| CEU | NPIP | 28732891 | 0.49    | 0.8528  | -0.817  |
| CEU | NPIP | 28737891 | 1.1806  | 1.8762  | -0.8856 |
| CEU | NPIP | 28742891 | 1.2558  | 1.8762  | -0.7899 |
| CEU | NPIP | 28747891 | 3.683   | 4.9463  | -0.7205 |
| CEU | NPIP | 28752891 | 7.282   | 6.8225  | 0.1966  |
| CEU | NPIP | 28757891 | 4.4212  | 3.2407  | 0.968   |
| CEU | NPIP | 28762891 | 3.2839  | 2.8996  | 0.3456  |
| CEU | NPIP | 28767891 | 4.0381  | 3.0701  | 0.8303  |
| CEU | NPIP | 28772891 | 1.0414  | 1.0234  | 0.0358  |
| CEU | NPIP | 28777891 | 0.9773  | 0.6822  | 0.7706  |
| CEU | NPIP | 28782891 | 1.0159  | 0.5117  | 1.5813  |
| CEU | NPIP | 28787891 | 0.0689  | 0.1706  | -0.6041 |
| CEU | NPIP | 28792891 | 0       | 0       | 0       |
| CEU | NPIP | 28797891 | 1.7811  | 1.5351  | 0.3648  |
| CEU | NPIP | 28802891 | 2.8027  | 2.8996  | -0.0871 |
| CEU | NPIP | 28807891 | 2.7199  | 2.5584  | 0.1609  |
| CEU | NPIP | 28812891 | 2.8147  | 3.0701  | -0.2191 |
| CEU | NPIP | 28817891 | 1.6984  | 3.0701  | -1.1766 |
| CEU | NPIP | 28822891 | 7.2533  | 5.2874  | 1.0571  |
| CEU | NPIP | 28827891 | 9.9048  | 6.9931  | 1.2183  |
| CEU | NPIP | 28832891 | 8.1303  | 6.3108  | 0.8354  |
| CEU | NPIP | 28837891 | 9.3527  | 8.3576  | 0.3537  |
| CEU | NPIP | 28842891 | 10.1142 | 9.2104  | 0.2937  |

## 2\_TajimasD\_data

|     |      |          |         |         |         |
|-----|------|----------|---------|---------|---------|
| CEU | NPIP | 28847891 | 8.43    | 7.1636  | 0.5184  |
| CEU | NPIP | 28852891 | 5.5929  | 4.9463  | 0.3688  |
| CEU | NPIP | 28857891 | 6.3329  | 4.9463  | 0.7908  |
| CEU | NPIP | 28862891 | 14.2977 | 9.8926  | 1.3395  |
| CEU | NPIP | 28867891 | 18.4587 | 11.9394 | 1.6621  |
| CEU | NPIP | 28872891 | 11.0614 | 6.9931  | 1.7022  |
| CEU | NPIP | 28877891 | 5.939   | 4.6052  | 0.8098  |
| CEU | NPIP | 28882891 | 5.0313  | 4.9463  | 0.0485  |
| CEU | NPIP | 28887891 | 5.2737  | 4.7757  | 0.2929  |
| CEU | NPIP | 28892891 | 8.2776  | 7.6753  | 0.2315  |
| CEU | NPIP | 28897891 | 7.0719  | 7.8459  | -0.2916 |
| CEU | NPIP | 28902891 | 5.2956  | 5.2874  | 0.0044  |
| CEU | NPIP | 28907891 | 5.663   | 5.458   | 0.1072  |
| CEU | NPIP | 28912891 | 5.0711  | 5.9697  | -0.4337 |
| CEU | NPIP | 28917891 | 6.6061  | 6.4814  | 0.0559  |
| CEU | NPIP | 28922891 | 8.8409  | 7.6753  | 0.448   |
| CEU | NPIP | 28927891 | 6.744   | 6.9931  | -0.1042 |
| CEU | NPIP | 28932891 | 3.9784  | 5.9697  | -0.961  |
| CEU | NPIP | 28937891 | 4.4059  | 5.9697  | -0.7547 |
| CEU | NPIP | 28942891 | 3.2822  | 5.6286  | -1.1935 |
| CEU | NPIP | 28947891 | 2.9847  | 4.9463  | -1.1187 |
| CEU | NPIP | 28952891 | 4.343   | 5.458   | -0.5829 |
| CEU | NPIP | 28957891 | 4.5807  | 6.6519  | -0.9068 |
| CEU | NPIP | 28962891 | 3.5677  | 5.9697  | -1.1592 |
| CEU | NPIP | 28967891 | 3.4467  | 5.2874  | -0.9898 |
| CEU | NPIP | 28972891 | 4.1377  | 4.9463  | -0.4611 |
| CEU | NPIP | 28977891 | 6.4084  | 6.6519  | -0.1066 |
| CEU | NPIP | 28982891 | 6.0752  | 7.8459  | -0.667  |
| CEU | NPIP | 28987891 | 4.9258  | 6.3108  | -0.6359 |
| CEU | NPIP | 28992891 | 4.6261  | 5.7991  | -0.581  |
| CEU | NPIP | 28997891 | 4.4616  | 6.4814  | -0.9053 |
| CEU | NPIP | 29002891 | 4.8468  | 6.8225  | -0.8454 |
| CEU | NPIP | 29007891 | 6.3919  | 9.3809  | -0.9549 |
| CEU | NPIP | 29012891 | 6.6603  | 9.3809  | -0.8691 |
| CEU | NPIP | 29017891 | 5.9619  | 6.6519  | -0.3021 |
| CEU | NPIP | 29022891 | 5.9996  | 6.6519  | -0.2856 |
| CEU | NPIP | 29027891 | 5.5762  | 6.6519  | -0.471  |
| CEU | NPIP | 29032891 | 5.2583  | 6.9931  | -0.7259 |
| CEU | NPIP | 29037891 | 4.7728  | 7.3342  | -1.0263 |
| CEU | NPIP | 29042891 | 4.8691  | 5.6286  | -0.3863 |
| CEU | NPIP | 29047891 | 3.1161  | 2.8996  | 0.1947  |
| CEU | NPIP | 29052891 | 2.2389  | 2.3879  | -0.1569 |
| CEU | NPIP | 29057891 | 3.6638  | 3.5818  | 0.0618  |
| CEU | NPIP | 29062891 | 5.0258  | 4.6052  | 0.2554  |
| CEU | NPIP | 29067891 | 4.7448  | 4.2641  | 0.312   |
| CEU | NPIP | 29072891 | 4.008   | 2.8996  | 0.9968  |
| CEU | NPIP | 29077891 | 4.155   | 3.4112  | 0.5842  |
| CEU | NPIP | 29082891 | 4.9101  | 5.458   | -0.2864 |
| CEU | NPIP | 29087891 | 5.7487  | 6.1402  | -0.1842 |

## 2\_TajimasD\_data

|     |      |          |         |         |         |
|-----|------|----------|---------|---------|---------|
| CEU | NPIP | 29092891 | 7.6423  | 6.6519  | 0.4336  |
| CEU | NPIP | 29097891 | 7.6434  | 7.5047  | 0.0544  |
| CEU | NPIP | 29102891 | 7.0695  | 8.187   | -0.4048 |
| CEU | NPIP | 29107891 | 8.9773  | 7.8459  | 0.4262  |
| CEU | NPIP | 29112891 | 12.2356 | 8.187   | 1.4667  |
| CEU | NPIP | 29117891 | 13.5277 | 10.2337 | 0.9704  |
| CEU | NPIP | 29122891 | 10.5768 | 8.8692  | 0.5746  |
| CEU | NPIP | 29127891 | 15.7075 | 10.4043 | 1.5384  |
| CEU | NPIP | 29132891 | 20.765  | 12.7922 | 1.9046  |
| CEU | NPIP | 29137891 | 22.3002 | 13.1333 | 2.136   |
| CEU | NPIP | 29142891 | 19.6422 | 12.1099 | 1.8949  |
| CEU | NPIP | 29147891 | 18.0202 | 13.3039 | 1.0856  |
| CEU | NPIP | 29152891 | 26.9505 | 17.0562 | 1.7975  |
| CHB | NPIP | 28142891 | 8.5662  | 9.9955  | -0.4292 |
| CHB | NPIP | 28147891 | 9.5159  | 10.6731 | -0.3268 |
| CHB | NPIP | 28152891 | 6.3922  | 8.3013  | -0.6809 |
| CHB | NPIP | 28157891 | 6.7548  | 8.3013  | -0.5516 |
| CHB | NPIP | 28162891 | 7.2493  | 8.979   | -0.5738 |
| CHB | NPIP | 28167891 | 6.1551  | 9.1484  | -0.9759 |
| CHB | NPIP | 28172891 | 7.2817  | 9.1484  | -0.6086 |
| CHB | NPIP | 28177891 | 7.7748  | 9.8261  | -0.6259 |
| CHB | NPIP | 28182891 | 9.7747  | 12.3673 | -0.6376 |
| CHB | NPIP | 28187891 | 9.1443  | 12.7061 | -0.8539 |
| CHB | NPIP | 28192891 | 6.2797  | 10.3343 | -1.1802 |
| CHB | NPIP | 28197891 | 8.242   | 9.9955  | -0.5265 |
| CHB | NPIP | 28202891 | 6.9551  | 9.1484  | -0.7151 |
| CHB | NPIP | 28207891 | 5.6236  | 8.3013  | -0.955  |
| CHB | NPIP | 28212891 | 8.0767  | 9.8261  | -0.5337 |
| CHB | NPIP | 28217891 | 8.1296  | 9.4872  | -0.4279 |
| CHB | NPIP | 28222891 | 8.9568  | 9.3178  | -0.1157 |
| CHB | NPIP | 28227891 | 11.1251 | 11.012  | 0.031   |
| CHB | NPIP | 28232891 | 18.135  | 15.7556 | 0.465   |
| CHB | NPIP | 28237891 | 17.2044 | 16.0944 | 0.2126  |
| CHB | NPIP | 28242891 | 15.4405 | 14.0615 | 0.3003  |
| CHB | NPIP | 28247891 | 15.7631 | 14.4003 | 0.2901  |
| CHB | NPIP | 28252891 | 11.192  | 12.5367 | -0.3265 |
| CHB | NPIP | 28257891 | 10.7492 | 11.5202 | -0.2027 |
| CHB | NPIP | 28262891 | 8.8959  | 11.5202 | -0.69   |
| CHB | NPIP | 28267891 | 6.9941  | 10.5037 | -1.0062 |
| CHB | NPIP | 28272891 | 5.3543  | 8.8096  | -1.1666 |
| CHB | NPIP | 28277891 | 4.042   | 9.1484  | -1.6649 |
| CHB | NPIP | 28282891 | 5.1688  | 10.1649 | -1.4769 |
| CHB | NPIP | 28287891 | 7.4083  | 10.1649 | -0.8149 |
| CHB | NPIP | 28292891 | 8.3569  | 8.979   | -0.2064 |
| CHB | NPIP | 28297891 | 5.471   | 6.946   | -0.6191 |
| CHB | NPIP | 28302891 | 3.2273  | 5.0825  | -1.03   |
| CHB | NPIP | 28307891 | 4.2161  | 5.0825  | -0.481  |
| CHB | NPIP | 28312891 | 3.2511  | 4.7436  | -0.8804 |
| CHB | NPIP | 28317891 | 2.8894  | 3.8965  | -0.7044 |

## 2\_TajimasD\_data

|     |      |          |        |         |         |
|-----|------|----------|--------|---------|---------|
| CHB | NPIP | 28322891 | 5.7331 | 5.5907  | 0.0727  |
| CHB | NPIP | 28327891 | 5.47   | 5.5907  | -0.0616 |
| CHB | NPIP | 28332891 | 6.5545 | 6.6072  | -0.0231 |
| CHB | NPIP | 28337891 | 9.6471 | 8.4708  | 0.4118  |
| CHB | NPIP | 28342891 | 7.608  | 7.6237  | -0.0061 |
| CHB | NPIP | 28347891 | 5.316  | 6.2684  | -0.4386 |
| CHB | NPIP | 28352891 | 4.2747 | 4.5742  | -0.1824 |
| CHB | NPIP | 28357891 | 2.284  | 3.0495  | -0.6583 |
| CHB | NPIP | 28362891 | 0.751  | 1.3553  | -0.9794 |
| CHB | NPIP | 28367891 | 0.8812 | 1.3553  | -0.7684 |
| CHB | NPIP | 28372891 | 2.3783 | 2.7106  | -0.3149 |
| CHB | NPIP | 28377891 | 2.1515 | 2.033   | 0.1413  |
| CHB | NPIP | 28382891 | 3.0421 | 2.2024  | 0.9402  |
| CHB | NPIP | 28387891 | 3.7047 | 3.0495  | 0.5635  |
| CHB | NPIP | 28392891 | 1.7207 | 2.2024  | -0.5394 |
| CHB | NPIP | 28397891 | 1.0946 | 1.5247  | -0.639  |
| CHB | NPIP | 28402891 | 1.0335 | 1.3553  | -0.5215 |
| CHB | NPIP | 28407891 | 0.3619 | 0.6777  | -0.8256 |
| CHB | NPIP | 28412891 | 1.5053 | 1.8636  | -0.4571 |
| CHB | NPIP | 28417891 | 2.9656 | 2.8801  | 0.0771  |
| CHB | NPIP | 28422891 | 3.1367 | 3.5577  | -0.3182 |
| CHB | NPIP | 28427891 | 1.7537 | 3.0495  | -1.1144 |
| CHB | NPIP | 28432891 | 0.5254 | 2.033   | -1.7978 |
| CHB | NPIP | 28437891 | 0.6417 | 2.033   | -1.6591 |
| CHB | NPIP | 28442891 | 0.6653 | 1.5247  | -1.2768 |
| CHB | NPIP | 28447891 | 0.7579 | 1.6942  | -1.285  |
| CHB | NPIP | 28452891 | 0.744  | 1.8636  | -1.4285 |
| CHB | NPIP | 28457891 | 0.4384 | 1.0165  | -1.1505 |
| CHB | NPIP | 28462891 | 0.4721 | 1.6942  | -1.6772 |
| CHB | NPIP | 28467891 | 0.4915 | 1.8636  | -1.7506 |
| CHB | NPIP | 28472891 | 0.0388 | 0.5082  | -1.4735 |
| CHB | NPIP | 28477891 | 0.4337 | 1.5247  | -1.6208 |
| CHB | NPIP | 28482891 | 2.3727 | 5.2519  | -1.5528 |
| CHB | NPIP | 28487891 | 4.8317 | 8.979   | -1.3758 |
| CHB | NPIP | 28492891 | 5.2241 | 9.1484  | -1.2795 |
| CHB | NPIP | 28497891 | 4.4991 | 7.9625  | -1.2834 |
| CHB | NPIP | 28502891 | 3.6547 | 8.1319  | -1.6273 |
| CHB | NPIP | 28507891 | 6.1038 | 9.4872  | -1.0665 |
| CHB | NPIP | 28512891 | 9.2046 | 9.9955  | -0.2375 |
| CHB | NPIP | 28517891 | 7.5332 | 7.4543  | 0.0311  |
| CHB | NPIP | 28522891 | 6.6052 | 5.5907  | 0.5176  |
| CHB | NPIP | 28527891 | 7.8664 | 7.1154  | 0.3084  |
| CHB | NPIP | 28532891 | 8.1974 | 8.1319  | 0.0238  |
| CHB | NPIP | 28537891 | 8.6377 | 9.3178  | -0.218  |
| CHB | NPIP | 28542891 | 7.0885 | 10.1649 | -0.9094 |
| CHB | NPIP | 28547891 | 3.8192 | 9.4872  | -1.7867 |
| CHB | NPIP | 28552891 | 4.5361 | 9.4872  | -1.5607 |
| CHB | NPIP | 28557891 | 7.0699 | 11.5202 | -1.1701 |
| CHB | NPIP | 28562891 | 7.3904 | 11.5202 | -1.0858 |

## 2\_TajimasD\_data

|     |      |          |         |         |         |
|-----|------|----------|---------|---------|---------|
| CHB | NPIP | 28567891 | 5.3505  | 9.6567  | -1.3353 |
| CHB | NPIP | 28572891 | 4.2589  | 9.6567  | -1.6737 |
| CHB | NPIP | 28577891 | 6.0046  | 9.4872  | -1.0978 |
| CHB | NPIP | 28582891 | 6.082   | 9.6567  | -1.1084 |
| CHB | NPIP | 28587891 | 5.5102  | 9.9955  | -1.3469 |
| CHB | NPIP | 28592891 | 4.9888  | 8.979   | -1.3237 |
| CHB | NPIP | 28597891 | 3.5201  | 7.2848  | -1.5133 |
| CHB | NPIP | 28602891 | 6.6973  | 10.3343 | -1.0587 |
| CHB | NPIP | 28607891 | 8.2277  | 12.0285 | -0.9595 |
| CHB | NPIP | 28612891 | 11.3543 | 12.0285 | -0.1702 |
| CHB | NPIP | 28617891 | 22.5363 | 19.8216 | 0.4257  |
| CHB | NPIP | 28622891 | 18.0615 | 17.4498 | 0.1084  |
| CHB | NPIP | 28627891 | 8.8307  | 10.8426 | -0.5599 |
| CHB | NPIP | 28632891 | 5.8449  | 10.5037 | -1.3357 |
| CHB | NPIP | 28637891 | 2.3139  | 7.7931  | -2.0708 |
| CHB | NPIP | 28642891 | 3.7405  | 10.1649 | -1.8991 |
| CHB | NPIP | 28647891 | 6.9884  | 14.0615 | -1.5404 |
| CHB | NPIP | 28652891 | 7.1007  | 10.5037 | -0.9756 |
| CHB | NPIP | 28657891 | 2.3453  | 3.2189  | -0.7182 |
| CHB | NPIP | 28662891 | 0       | 0       | 0       |
| CHB | NPIP | 28667891 | 0       | 0       | 0       |
| CHB | NPIP | 28672891 | 0.3952  | 0.3388  | 0.2262  |
| CHB | NPIP | 28677891 | 0.4523  | 0.5082  | -0.1755 |
| CHB | NPIP | 28682891 | 0.383   | 0.5082  | -0.393  |
| CHB | NPIP | 28687891 | 0.8195  | 0.6777  | 0.3707  |
| CHB | NPIP | 28692891 | 0.9092  | 1.5247  | -0.9144 |
| CHB | NPIP | 28697891 | 0.6379  | 1.6942  | -1.4496 |
| CHB | NPIP | 28702891 | 1.8968  | 2.033   | -0.1624 |
| CHB | NPIP | 28707891 | 3.8235  | 3.8965  | -0.0511 |
| CHB | NPIP | 28712891 | 2.3899  | 3.2189  | -0.6816 |
| CHB | NPIP | 28717891 | 0.2408  | 0.8471  | -1.3672 |
| CHB | NPIP | 28722891 | 0.558   | 0.5082  | 0.1563  |
| CHB | NPIP | 28727891 | 0.558   | 0.5082  | 0.1563  |
| CHB | NPIP | 28732891 | 0.309   | 0.8471  | -1.2134 |
| CHB | NPIP | 28737891 | 0.6092  | 2.033   | -1.6979 |
| CHB | NPIP | 28742891 | 0.9751  | 2.5412  | -1.5639 |
| CHB | NPIP | 28747891 | 3.0868  | 4.066   | -0.6603 |
| CHB | NPIP | 28752891 | 5.9762  | 5.7601  | 0.1074  |
| CHB | NPIP | 28757891 | 3.9383  | 4.066   | -0.0861 |
| CHB | NPIP | 28762891 | 3.1527  | 4.2354  | -0.7048 |
| CHB | NPIP | 28767891 | 3.6189  | 4.066   | -0.3015 |
| CHB | NPIP | 28772891 | 0.8403  | 0.8471  | -0.0153 |
| CHB | NPIP | 28777891 | 0.9732  | 1.0165  | -0.0862 |
| CHB | NPIP | 28782891 | 1.0849  | 1.3553  | -0.4382 |
| CHB | NPIP | 28787891 | 0.1117  | 0.3388  | -0.911  |
| CHB | NPIP | 28792891 | 0       | 0       | 0       |
| CHB | NPIP | 28797891 | 1.8487  | 1.3553  | 0.7996  |
| CHB | NPIP | 28802891 | 2.6225  | 2.3718  | 0.2646  |
| CHB | NPIP | 28807891 | 2.746   | 2.7106  | 0.0335  |

## 2\_TajimasD\_data

|     |      |          |         |         |         |
|-----|------|----------|---------|---------|---------|
| CHB | NPIP | 28812891 | 3.3236  | 4.066   | -0.5006 |
| CHB | NPIP | 28817891 | 1.874   | 3.8965  | -1.4146 |
| CHB | NPIP | 28822891 | 5.7285  | 7.6237  | -0.7308 |
| CHB | NPIP | 28827891 | 7.3318  | 10.5037 | -0.9094 |
| CHB | NPIP | 28832891 | 5.6063  | 9.4872  | -1.2233 |
| CHB | NPIP | 28837891 | 6.8291  | 11.1814 | -1.1768 |
| CHB | NPIP | 28842891 | 7.5212  | 10.8426 | -0.9244 |
| CHB | NPIP | 28847891 | 6.387   | 9.3178  | -0.9394 |
| CHB | NPIP | 28852891 | 4.4774  | 8.1319  | -1.3283 |
| CHB | NPIP | 28857891 | 5.1192  | 7.4543  | -0.9192 |
| CHB | NPIP | 28862891 | 10.6402 | 10.6731 | -0.0093 |
| CHB | NPIP | 28867891 | 13.8007 | 11.8591 | 0.4967  |
| CHB | NPIP | 28872891 | 8.2736  | 7.9625  | 0.1153  |
| CHB | NPIP | 28877891 | 4.2994  | 5.5907  | -0.6588 |
| CHB | NPIP | 28882891 | 3.7403  | 6.2684  | -1.1644 |
| CHB | NPIP | 28887891 | 4.4818  | 7.9625  | -1.2898 |
| CHB | NPIP | 28892891 | 6.4184  | 7.9625  | -0.5722 |
| CHB | NPIP | 28897891 | 5.0615  | 7.6237  | -0.9881 |
| CHB | NPIP | 28902891 | 4.6712  | 8.1319  | -1.2579 |
| CHB | NPIP | 28907891 | 5.7255  | 7.4543  | -0.6805 |
| CHB | NPIP | 28912891 | 5.0925  | 8.8096  | -1.255  |
| CHB | NPIP | 28917891 | 4.8983  | 9.3178  | -1.4166 |
| CHB | NPIP | 28922891 | 7.2511  | 9.3178  | -0.6625 |
| CHB | NPIP | 28927891 | 6.3154  | 8.3013  | -0.7083 |
| CHB | NPIP | 28932891 | 3.6433  | 5.5907  | -0.9936 |
| CHB | NPIP | 28937891 | 4.6495  | 6.4378  | -0.8041 |
| CHB | NPIP | 28942891 | 3.7891  | 5.7601  | -0.9792 |
| CHB | NPIP | 28947891 | 3.8686  | 5.5907  | -0.8787 |
| CHB | NPIP | 28952891 | 5.3948  | 6.946   | -0.6511 |
| CHB | NPIP | 28957891 | 6.0076  | 7.1154  | -0.4549 |
| CHB | NPIP | 28962891 | 6.5064  | 7.1154  | -0.2501 |
| CHB | NPIP | 28967891 | 5.9044  | 6.2684  | -0.1676 |
| CHB | NPIP | 28972891 | 5.0503  | 7.6237  | -0.9924 |
| CHB | NPIP | 28977891 | 6.1323  | 8.8096  | -0.9039 |
| CHB | NPIP | 28982891 | 7.0297  | 8.4708  | -0.5045 |
| CHB | NPIP | 28987891 | 6.3023  | 8.979   | -0.8879 |
| CHB | NPIP | 28992891 | 5.0407  | 7.4543  | -0.9501 |
| CHB | NPIP | 28997891 | 5.1786  | 6.2684  | -0.5019 |
| CHB | NPIP | 29002891 | 6.4062  | 8.6402  | -0.7679 |
| CHB | NPIP | 29007891 | 8.3733  | 10.6731 | -0.6496 |
| CHB | NPIP | 29012891 | 7.7409  | 9.4872  | -0.5505 |
| CHB | NPIP | 29017891 | 6.6726  | 7.9625  | -0.478  |
| CHB | NPIP | 29022891 | 7.7537  | 8.4708  | -0.251  |
| CHB | NPIP | 29027891 | 8.3703  | 8.979   | -0.2019 |
| CHB | NPIP | 29032891 | 8.2254  | 8.8096  | -0.1972 |
| CHB | NPIP | 29037891 | 5.6789  | 7.7931  | -0.7991 |
| CHB | NPIP | 29042891 | 3.9206  | 5.4213  | -0.7869 |
| CHB | NPIP | 29047891 | 2.5279  | 2.7106  | -0.1731 |
| CHB | NPIP | 29052891 | 2.0839  | 2.3718  | -0.3039 |

## 2\_TajimasD\_data

|     |      |          |         |         |         |
|-----|------|----------|---------|---------|---------|
| CHB | NPIP | 29057891 | 3.8712  | 3.7271  | 0.1047  |
| CHB | NPIP | 29062891 | 4.4637  | 4.5742  | -0.0673 |
| CHB | NPIP | 29067891 | 4.4875  | 4.4048  | 0.052   |
| CHB | NPIP | 29072891 | 4.3598  | 3.5577  | 0.6062  |
| CHB | NPIP | 29077891 | 3.7727  | 3.0495  | 0.622   |
| CHB | NPIP | 29082891 | 4.3811  | 4.5742  | -0.1176 |
| CHB | NPIP | 29087891 | 4.4158  | 5.4213  | -0.5273 |
| CHB | NPIP | 29092891 | 5.1239  | 6.7766  | -0.7094 |
| CHB | NPIP | 29097891 | 5.5627  | 8.979   | -1.1333 |
| CHB | NPIP | 29102891 | 5.9248  | 9.1484  | -1.051  |
| CHB | NPIP | 29107891 | 7.0897  | 8.6402  | -0.533  |
| CHB | NPIP | 29112891 | 8.5682  | 8.979   | -0.1363 |
| CHB | NPIP | 29117891 | 9.2572  | 10.1649 | -0.2683 |
| CHB | NPIP | 29122891 | 7.7731  | 8.8096  | -0.35   |
| CHB | NPIP | 29127891 | 13.8704 | 10.5037 | 0.9652  |
| CHB | NPIP | 29132891 | 21.4428 | 13.7226 | 1.7207  |
| CHB | NPIP | 29137891 | 24.9225 | 15.5862 | 1.8434  |
| CHB | NPIP | 29142891 | 19.8426 | 14.7391 | 1.0628  |
| CHB | NPIP | 29147891 | 17.2932 | 14.2309 | 0.6594  |
| CHB | NPIP | 29152891 | 25.0737 | 17.4498 | 1.3512  |
| YRI | NPIP | 28142891 | 8.5881  | 13.2769 | -1.0746 |
| YRI | NPIP | 28147891 | 10.6745 | 13.613  | -0.6577 |
| YRI | NPIP | 28152891 | 9.1912  | 11.2602 | -0.5539 |
| YRI | NPIP | 28157891 | 7.2839  | 12.7727 | -1.3049 |
| YRI | NPIP | 28162891 | 7.3134  | 11.7644 | -1.1435 |
| YRI | NPIP | 28167891 | 7.5706  | 10.756  | -0.8902 |
| YRI | NPIP | 28172891 | 8.4823  | 12.7727 | -1.02   |
| YRI | NPIP | 28177891 | 8.8249  | 13.445  | -1.0463 |
| YRI | NPIP | 28182891 | 9.5903  | 14.4534 | -1.0283 |
| YRI | NPIP | 28187891 | 8.179   | 12.4366 | -1.038  |
| YRI | NPIP | 28192891 | 6.6327  | 9.9157  | -0.9898 |
| YRI | NPIP | 28197891 | 9.6105  | 10.4199 | -0.233  |
| YRI | NPIP | 28202891 | 9.4201  | 10.924  | -0.4142 |
| YRI | NPIP | 28207891 | 7.7025  | 10.4199 | -0.7823 |
| YRI | NPIP | 28212891 | 9.9066  | 11.4282 | -0.4017 |
| YRI | NPIP | 28217891 | 10.1064 | 12.9408 | -0.6656 |
| YRI | NPIP | 28222891 | 10.2213 | 12.6047 | -0.5738 |
| YRI | NPIP | 28227891 | 13.3084 | 13.1089 | 0.0463  |
| YRI | NPIP | 28232891 | 16.5851 | 17.1423 | -0.1001 |
| YRI | NPIP | 28237891 | 15.2285 | 18.4868 | -0.5445 |
| YRI | NPIP | 28242891 | 16.2373 | 16.302  | -0.0122 |
| YRI | NPIP | 28247891 | 18.9542 | 15.7978 | 0.6132  |
| YRI | NPIP | 28252891 | 17.0403 | 15.9659 | 0.2066  |
| YRI | NPIP | 28257891 | 15.6424 | 14.7895 | 0.1764  |
| YRI | NPIP | 28262891 | 16.3829 | 15.1256 | 0.2546  |
| YRI | NPIP | 28267891 | 14.695  | 13.9492 | 0.1631  |
| YRI | NPIP | 28272891 | 10.2308 | 12.4366 | -0.5378 |
| YRI | NPIP | 28277891 | 9.1509  | 14.6214 | -1.1441 |
| YRI | NPIP | 28282891 | 9.1414  | 15.9659 | -1.3124 |

## 2\_TajimasD\_data

|     |      |          |         |         |         |
|-----|------|----------|---------|---------|---------|
| YRI | NPIP | 28287891 | 7.4642  | 14.2853 | -1.4584 |
| YRI | NPIP | 28292891 | 9.1392  | 13.613  | -1.0013 |
| YRI | NPIP | 28297891 | 10.4599 | 12.2685 | -0.4466 |
| YRI | NPIP | 28302891 | 6.5111  | 7.5628  | -0.4071 |
| YRI | NPIP | 28307891 | 5.2392  | 8.067   | -1.0319 |
| YRI | NPIP | 28312891 | 4.6617  | 9.9157  | -1.5841 |
| YRI | NPIP | 28317891 | 2.5014  | 8.067   | -2.0309 |
| YRI | NPIP | 28322891 | 5.1205  | 9.4115  | -1.3581 |
| YRI | NPIP | 28327891 | 5.6906  | 8.7392  | -1.0334 |
| YRI | NPIP | 28332891 | 7.5016  | 9.5795  | -0.6469 |
| YRI | NPIP | 28337891 | 11.0612 | 12.6047 | -0.3716 |
| YRI | NPIP | 28342891 | 8.3647  | 10.924  | -0.7049 |
| YRI | NPIP | 28347891 | 7.037   | 9.7476  | -0.8304 |
| YRI | NPIP | 28352891 | 5.627   | 7.0586  | -0.5902 |
| YRI | NPIP | 28357891 | 1.8728  | 3.5293  | -1.256  |
| YRI | NPIP | 28362891 | 0.3787  | 1.6806  | -1.791  |
| YRI | NPIP | 28367891 | 0.6331  | 2.5209  | -1.8906 |
| YRI | NPIP | 28372891 | 2.316   | 4.0335  | -1.1621 |
| YRI | NPIP | 28377891 | 2.5966  | 3.0251  | -0.3696 |
| YRI | NPIP | 28382891 | 3.8341  | 5.378   | -0.8125 |
| YRI | NPIP | 28387891 | 4.7566  | 6.5544  | -0.7926 |
| YRI | NPIP | 28392891 | 2.4653  | 3.3612  | -0.7078 |
| YRI | NPIP | 28397891 | 1.7387  | 1.8487  | -0.1407 |
| YRI | NPIP | 28402891 | 1.9932  | 1.6806  | 0.43    |
| YRI | NPIP | 28407891 | 1.0482  | 0.8403  | 0.4696  |
| YRI | NPIP | 28412891 | 1.5057  | 1.8487  | -0.4387 |
| YRI | NPIP | 28417891 | 2.7204  | 3.1932  | -0.3899 |
| YRI | NPIP | 28422891 | 2.7587  | 4.2016  | -0.9425 |
| YRI | NPIP | 28427891 | 2.226   | 3.6974  | -1.0725 |
| YRI | NPIP | 28432891 | 1.6173  | 1.6806  | -0.0871 |
| YRI | NPIP | 28437891 | 1.1459  | 1.6806  | -0.7356 |
| YRI | NPIP | 28442891 | 1.33    | 2.0167  | -0.8211 |
| YRI | NPIP | 28447891 | 1.2867  | 2.3529  | -1.1286 |
| YRI | NPIP | 28452891 | 0.6965  | 3.0251  | -2.0088 |
| YRI | NPIP | 28457891 | 0.3834  | 1.6806  | -1.7846 |
| YRI | NPIP | 28462891 | 1.6311  | 2.1848  | -0.6217 |
| YRI | NPIP | 28467891 | 1.6678  | 2.3529  | -0.7252 |
| YRI | NPIP | 28472891 | 0.2919  | 0.8403  | -1.2386 |
| YRI | NPIP | 28477891 | 0.428   | 1.8487  | -1.8172 |
| YRI | NPIP | 28482891 | 2.3573  | 6.2183  | -1.7849 |
| YRI | NPIP | 28487891 | 5.3985  | 11.4282 | -1.5919 |
| YRI | NPIP | 28492891 | 5.8655  | 10.924  | -1.3932 |
| YRI | NPIP | 28497891 | 5.9436  | 9.7476  | -1.1653 |
| YRI | NPIP | 28502891 | 7.8969  | 12.4366 | -1.1068 |
| YRI | NPIP | 28507891 | 9.7946  | 14.4534 | -0.9851 |
| YRI | NPIP | 28512891 | 9.1972  | 15.1256 | -1.2004 |
| YRI | NPIP | 28517891 | 7.1304  | 13.445  | -1.4301 |
| YRI | NPIP | 28522891 | 6.7308  | 11.7644 | -1.2932 |
| YRI | NPIP | 28527891 | 8.2585  | 13.7811 | -1.2218 |



## 2\_TajimasD\_data

|     |      |          |         |         |         |
|-----|------|----------|---------|---------|---------|
| YRI | NPIP | 28532891 | 8.9535  | 13.613  | -1.0429 |
| YRI | NPIP | 28537891 | 9.7987  | 13.7811 | -0.881  |
| YRI | NPIP | 28542891 | 7.5632  | 12.4366 | -1.1881 |
| YRI | NPIP | 28547891 | 4.1184  | 8.5712  | -1.5367 |
| YRI | NPIP | 28552891 | 5.9795  | 9.7476  | -1.1543 |
| YRI | NPIP | 28557891 | 8.7286  | 12.1005 | -0.8436 |
| YRI | NPIP | 28562891 | 8.3894  | 12.1005 | -0.9284 |
| YRI | NPIP | 28567891 | 5.6023  | 11.7644 | -1.5831 |
| YRI | NPIP | 28572891 | 6.3361  | 13.2769 | -1.5907 |
| YRI | NPIP | 28577891 | 8.2182  | 11.0921 | -0.7803 |
| YRI | NPIP | 28582891 | 8.1247  | 9.9157  | -0.54   |
| YRI | NPIP | 28587891 | 7.3779  | 11.5963 | -1.0985 |
| YRI | NPIP | 28592891 | 6.648   | 12.2685 | -1.388  |
| YRI | NPIP | 28597891 | 6.1482  | 11.7644 | -1.4428 |
| YRI | NPIP | 28602891 | 8.9616  | 16.9743 | -1.4533 |
| YRI | NPIP | 28607891 | 12.1902 | 19.3272 | -1.1428 |
| YRI | NPIP | 28612891 | 15.7403 | 16.6382 | -0.166  |
| YRI | NPIP | 28617891 | 26.2472 | 24.7051 | 0.1948  |
| YRI | NPIP | 28622891 | 23.6773 | 20.1675 | 0.5394  |
| YRI | NPIP | 28627891 | 16.3924 | 11.7644 | 1.189   |
| YRI | NPIP | 28632891 | 11.1245 | 10.2518 | 0.2551  |
| YRI | NPIP | 28637891 | 4.4449  | 8.7392  | -1.4557 |
| YRI | NPIP | 28642891 | 8.1691  | 13.2769 | -1.1706 |
| YRI | NPIP | 28647891 | 13.4279 | 16.9743 | -0.6432 |
| YRI | NPIP | 28652891 | 11.2969 | 14.4534 | -0.6674 |
| YRI | NPIP | 28657891 | 3.6186  | 5.378   | -0.9259 |
| YRI | NPIP | 28662891 | 0.1281  | 0.6722  | -1.4244 |
| YRI | NPIP | 28667891 | 0.1464  | 0.8403  | -1.5673 |
| YRI | NPIP | 28672891 | 0.4859  | 1.1764  | -1.235  |
| YRI | NPIP | 28677891 | 0.6668  | 1.1764  | -0.9114 |
| YRI | NPIP | 28682891 | 0.3726  | 0.5042  | -0.4136 |
| YRI | NPIP | 28687891 | 0.864   | 0.8403  | 0.0535  |
| YRI | NPIP | 28692891 | 1.7146  | 1.5126  | 0.3008  |
| YRI | NPIP | 28697891 | 2.0684  | 1.6806  | 0.5335  |
| YRI | NPIP | 28702891 | 2.2391  | 2.0167  | 0.2659  |
| YRI | NPIP | 28707891 | 4.718   | 4.3696  | 0.22    |
| YRI | NPIP | 28712891 | 4.7092  | 3.8654  | 0.5921  |
| YRI | NPIP | 28717891 | 1.186   | 0.8403  | 0.7808  |
| YRI | NPIP | 28722891 | 0.5916  | 0.5042  | 0.2747  |
| YRI | NPIP | 28727891 | 0.5916  | 0.5042  | 0.2747  |
| YRI | NPIP | 28732891 | 0.1335  | 0.6722  | -1.4103 |
| YRI | NPIP | 28737891 | 1.0293  | 2.689   | -1.5773 |
| YRI | NPIP | 28742891 | 2.2375  | 3.3612  | -0.8878 |
| YRI | NPIP | 28747891 | 5.2555  | 6.7225  | -0.6321 |
| YRI | NPIP | 28752891 | 6.579   | 8.235   | -0.5929 |
| YRI | NPIP | 28757891 | 4.5795  | 4.5377  | 0.0255  |
| YRI | NPIP | 28762891 | 4.5504  | 5.378   | -0.4355 |
| YRI | NPIP | 28767891 | 3.6178  | 4.3696  | -0.4747 |
| YRI | NPIP | 28772891 | 1.0003  | 1.0084  | -0.0161 |

## 2\_TajimasD\_data

|     |      |          |         |         |         |
|-----|------|----------|---------|---------|---------|
| YRI | NPIP | 28777891 | 1.5473  | 1.5126  | 0.0517  |
| YRI | NPIP | 28782891 | 2.0684  | 1.5126  | 0.8276  |
| YRI | NPIP | 28787891 | 0.5395  | 0.3361  | 0.8166  |
| YRI | NPIP | 28792891 | 0       | 0       | 0       |
| YRI | NPIP | 28797891 | 1.4898  | 1.1764  | 0.5605  |
| YRI | NPIP | 28802891 | 2.9019  | 2.689   | 0.2023  |
| YRI | NPIP | 28807891 | 3.6898  | 3.5293  | 0.1217  |
| YRI | NPIP | 28812891 | 3.8699  | 4.5377  | -0.4081 |
| YRI | NPIP | 28817891 | 2.5997  | 4.8738  | -1.3054 |
| YRI | NPIP | 28822891 | 6.2799  | 10.0837 | -1.129  |
| YRI | NPIP | 28827891 | 9.0082  | 11.9324 | -0.7413 |
| YRI | NPIP | 28832891 | 7.9794  | 9.0754  | -0.3588 |
| YRI | NPIP | 28837891 | 6.198   | 9.5795  | -1.0528 |
| YRI | NPIP | 28842891 | 6.9884  | 9.7476  | -0.8452 |
| YRI | NPIP | 28847891 | 7.7548  | 9.7476  | -0.6105 |
| YRI | NPIP | 28852891 | 6.722   | 9.2434  | -0.8115 |
| YRI | NPIP | 28857891 | 7.7336  | 8.4031  | -0.2353 |
| YRI | NPIP | 28862891 | 11.7196 | 11.2602 | 0.123   |
| YRI | NPIP | 28867891 | 13.3955 | 14.2853 | -0.1902 |
| YRI | NPIP | 28872891 | 8.7497  | 9.7476  | -0.3057 |
| YRI | NPIP | 28877891 | 5.9661  | 6.2183  | -0.1166 |
| YRI | NPIP | 28882891 | 3.9619  | 5.8822  | -0.9331 |
| YRI | NPIP | 28887891 | 4.813   | 6.0502  | -0.5862 |
| YRI | NPIP | 28892891 | 7.7611  | 9.2434  | -0.477  |
| YRI | NPIP | 28897891 | 6.8156  | 9.2434  | -0.7813 |
| YRI | NPIP | 28902891 | 5.7025  | 7.8989  | -0.8171 |
| YRI | NPIP | 28907891 | 6.2821  | 9.2434  | -0.953  |
| YRI | NPIP | 28912891 | 5.7862  | 9.4115  | -1.1474 |
| YRI | NPIP | 28917891 | 4.4374  | 8.5712  | -1.4266 |
| YRI | NPIP | 28922891 | 7.8634  | 9.9157  | -0.6188 |
| YRI | NPIP | 28927891 | 7.9307  | 9.2434  | -0.4225 |
| YRI | NPIP | 28932891 | 4.9728  | 7.2267  | -0.9095 |
| YRI | NPIP | 28937891 | 5.5793  | 7.5628  | -0.7679 |
| YRI | NPIP | 28942891 | 3.9775  | 7.7309  | -1.4241 |
| YRI | NPIP | 28947891 | 3.6881  | 8.7392  | -1.7122 |
| YRI | NPIP | 28952891 | 5.8485  | 9.0754  | -1.0563 |
| YRI | NPIP | 28957891 | 7.4836  | 9.7476  | -0.6935 |
| YRI | NPIP | 28962891 | 7.7133  | 11.4282 | -0.9807 |
| YRI | NPIP | 28967891 | 7.6355  | 10.5879 | -0.8373 |
| YRI | NPIP | 28972891 | 6.616   | 10.0837 | -1.0293 |
| YRI | NPIP | 28977891 | 6.554   | 10.756  | -1.1742 |
| YRI | NPIP | 28982891 | 9.2082  | 12.1005 | -0.7236 |
| YRI | NPIP | 28987891 | 9.7946  | 13.2769 | -0.7981 |
| YRI | NPIP | 28992891 | 6.7176  | 9.7476  | -0.9282 |
| YRI | NPIP | 28997891 | 6.6893  | 8.7392  | -0.6949 |
| YRI | NPIP | 29002891 | 11.8201 | 12.4366 | -0.1503 |
| YRI | NPIP | 29007891 | 13.6747 | 15.2937 | -0.3244 |
| YRI | NPIP | 29012891 | 8.5786  | 12.6047 | -0.9692 |
| YRI | NPIP | 29017891 | 7.6687  | 9.9157  | -0.6775 |

## 2\_TajimasD\_data

|     |      |          |         |         |         |
|-----|------|----------|---------|---------|---------|
| YRI | NPIP | 29022891 | 9.157   | 11.7644 | -0.6699 |
| YRI | NPIP | 29027891 | 9.4412  | 11.9324 | -0.6315 |
| YRI | NPIP | 29032891 | 9.6899  | 10.0837 | -0.1169 |
| YRI | NPIP | 29037891 | 7.2518  | 9.0754  | -0.5969 |
| YRI | NPIP | 29042891 | 5.0397  | 9.7476  | -1.4422 |
| YRI | NPIP | 29047891 | 2.9647  | 6.3864  | -1.5443 |
| YRI | NPIP | 29052891 | 2.819   | 2.8571  | -0.0345 |
| YRI | NPIP | 29057891 | 3.6316  | 3.6974  | -0.048  |
| YRI | NPIP | 29062891 | 5.2485  | 6.0502  | -0.3799 |
| YRI | NPIP | 29067891 | 5.894   | 6.8906  | -0.4199 |
| YRI | NPIP | 29072891 | 3.9804  | 5.2099  | -0.6655 |
| YRI | NPIP | 29077891 | 3.7676  | 4.8738  | -0.635  |
| YRI | NPIP | 29082891 | 4.3959  | 7.2267  | -1.1423 |
| YRI | NPIP | 29087891 | 5.3744  | 8.235   | -1.0243 |
| YRI | NPIP | 29092891 | 8.3152  | 9.9157  | -0.4826 |
| YRI | NPIP | 29097891 | 7.8795  | 12.6047 | -1.1375 |
| YRI | NPIP | 29102891 | 6.7998  | 13.1089 | -1.4635 |
| YRI | NPIP | 29107891 | 9.3746  | 10.756  | -0.386  |
| YRI | NPIP | 29112891 | 12.0948 | 11.5963 | 0.1298  |
| YRI | NPIP | 29117891 | 11.9801 | 14.9575 | -0.6093 |
| YRI | NPIP | 29122891 | 10.0824 | 14.4534 | -0.9242 |
| YRI | NPIP | 29127891 | 14.684  | 15.9659 | -0.2465 |
| YRI | NPIP | 29132891 | 18.8037 | 16.4701 | 0.4356  |
| YRI | NPIP | 29137891 | 20.9585 | 19.8313 | 0.1761  |
| YRI | NPIP | 29142891 | 19.3874 | 21.3439 | -0.2847 |
| YRI | NPIP | 29147891 | 16.1946 | 19.8313 | -0.5681 |
| YRI | NPIP | 29152891 | 16.9939 | 22.0162 | -0.7092 |
| CEU | NPIP | 28886310 | 5.8861  | 5.2874  | 0.3219  |
| CEU | NPIP | 28891310 | 7.3394  | 6.8225  | 0.2212  |
| CEU | NPIP | 28896310 | 7.5636  | 8.3576  | -0.2822 |
| CEU | NPIP | 28901310 | 6.1398  | 6.3108  | -0.0785 |
| CEU | NPIP | 28906310 | 5.6131  | 5.2874  | 0.1751  |
| CEU | NPIP | 28911310 | 4.2092  | 5.1169  | -0.5024 |
| CEU | NPIP | 28916310 | 5.1727  | 5.7991  | -0.3103 |
| CEU | NPIP | 28921310 | 5.706   | 6.8225  | -0.4777 |
| CEU | NPIP | 28926310 | 7.5088  | 7.1636  | 0.1413  |
| CEU | NPIP | 28931310 | 7.1119  | 6.3108  | 0.3678  |
| CEU | NPIP | 28936310 | 4.5733  | 5.9697  | -0.6739 |
| CEU | NPIP | 28941310 | 4.209   | 6.3108  | -0.965  |
| CEU | NPIP | 28946310 | 2.7238  | 5.2874  | -1.3785 |
| CEU | NPIP | 28951310 | 2.9872  | 4.9463  | -1.1173 |
| CEU | NPIP | 28956310 | 4.8654  | 6.3108  | -0.6636 |
| CEU | NPIP | 28961310 | 4.7273  | 6.1402  | -0.6649 |
| CEU | NPIP | 28966310 | 3.9942  | 6.3108  | -1.0636 |
| CEU | NPIP | 28971310 | 3.5102  | 5.6286  | -1.0775 |
| CEU | NPIP | 28976310 | 5.5477  | 5.6286  | -0.0412 |
| CEU | NPIP | 28981310 | 6.2377  | 6.9931  | -0.3161 |
| CEU | NPIP | 28986310 | 4.8273  | 6.6519  | -0.7988 |
| CEU | NPIP | 28991310 | 5.2185  | 6.4814  | -0.5661 |

## 2\_TajimasD\_data

|     |      |          |         |         |         |
|-----|------|----------|---------|---------|---------|
| CEU | NPIP | 28996310 | 4.4599  | 6.3108  | -0.8498 |
| CEU | NPIP | 29001310 | 3.858   | 6.1402  | -1.0739 |
| CEU | NPIP | 29006310 | 4.9532  | 8.6987  | -1.2832 |
| CEU | NPIP | 29011310 | 7.214   | 9.3809  | -0.6922 |
| CEU | NPIP | 29016310 | 6.4234  | 6.6519  | -0.1    |
| CEU | NPIP | 29021310 | 5.3836  | 6.8225  | -0.6157 |
| CEU | NPIP | 29026310 | 7.464   | 7.6753  | -0.0812 |
| CEU | NPIP | 29031310 | 4.8633  | 6.8225  | -0.8383 |
| CEU | NPIP | 29036310 | 4.6209  | 6.6519  | -0.8892 |
| CEU | NPIP | 29041310 | 5.4991  | 6.4814  | -0.4403 |
| CEU | NPIP | 29046310 | 3.3181  | 4.0935  | -0.5214 |
| CEU | NPIP | 29051310 | 1.7159  | 1.1939  | 0.9302  |
| CEU | NPIP | 29056310 | 3.222   | 3.4112  | -0.1486 |
| CEU | NPIP | 29061310 | 6.0526  | 5.9697  | 0.04    |
| CEU | NPIP | 29066310 | 4.2533  | 3.7524  | 0.3629  |
| CEU | NPIP | 29071310 | 3.5079  | 2.5584  | 0.9459  |
| CEU | NPIP | 29076310 | 4.0546  | 3.2407  | 0.6674  |
| CEU | NPIP | 29081310 | 5.7248  | 5.6286  | 0.0489  |
| CEU | NPIP | 29086310 | 6.2707  | 6.4814  | -0.0944 |
| CEU | NPIP | 29091310 | 7.1478  | 5.9697  | 0.5686  |
| CEU | NPIP | 29096310 | 6.2769  | 6.3108  | -0.0156 |
| CEU | NPIP | 29101310 | 7.1482  | 8.0164  | -0.3207 |
| CEU | NPIP | 29106310 | 8.8903  | 8.5281  | 0.1264  |
| CEU | NPIP | 29111310 | 10.1383 | 7.6753  | 0.9467  |
| CEU | NPIP | 29116310 | 13.9299 | 9.5515  | 1.3755  |
| CEU | NPIP | 29121310 | 11.2779 | 9.3809  | 0.606   |
| CEU | NPIP | 29126310 | 13.8885 | 9.7221  | 1.2875  |
| CEU | NPIP | 29131310 | 19.1746 | 12.1099 | 1.7773  |
| CEU | NPIP | 29136310 | 21.2723 | 12.7922 | 2.0258  |
| CEU | NPIP | 29141310 | 21.5794 | 13.4744 | 1.8433  |
| CEU | NPIP | 29146310 | 18.1994 | 13.1333 | 1.1805  |
| CEU | NPIP | 29151310 | 25.1717 | 15.6917 | 1.8651  |
| CEU | NPIP | 29156310 | 27.2637 | 16.0329 | 2.1647  |
| CEU | NPIP | 29161310 | 17.8433 | 12.1099 | 1.4424  |
| CEU | NPIP | 29166310 | 12.8169 | 10.7454 | 0.5831  |
| CEU | NPIP | 29171310 | 7.8002  | 8.0164  | -0.0799 |
| CEU | NPIP | 29176310 | 4.758   | 6.3108  | -0.7129 |
| CEU | NPIP | 29181310 | 8.2678  | 7.8459  | 0.1589  |
| CEU | NPIP | 29186310 | 19.038  | 11.7688 | 1.8786  |
| CEU | NPIP | 29191310 | 22.4858 | 12.2805 | 2.5337  |
| CEU | NPIP | 29196310 | 13.5308 | 9.8926  | 1.1063  |
| CEU | NPIP | 29201310 | 9.6586  | 9.7221  | -0.0196 |
| CEU | NPIP | 29206310 | 9.6693  | 10.2337 | -0.1663 |
| CEU | NPIP | 29211310 | 12.9773 | 11.7688 | 0.3123  |
| CEU | NPIP | 29216310 | 10.8728 | 8.187   | 0.973   |
| CEU | NPIP | 29221310 | 7.4776  | 6.6519  | 0.3615  |
| CEU | NPIP | 29226310 | 10.5397 | 9.0398  | 0.4959  |
| CEU | NPIP | 29231310 | 14.4051 | 10.0632 | 1.2994  |
| CEU | NPIP | 29236310 | 17.5708 | 13.3039 | 0.9822  |

## 2\_TajimasD\_data

|     |      |          |         |         |         |
|-----|------|----------|---------|---------|---------|
| CEU | NPIP | 29241310 | 17.9126 | 14.3272 | 0.7693  |
| CEU | NPIP | 29246310 | 16.4523 | 12.1099 | 1.0924  |
| CEU | NPIP | 29251310 | 13.7963 | 10.5749 | 0.9204  |
| CEU | NPIP | 29256310 | 14.5512 | 10.7454 | 1.0712  |
| CEU | NPIP | 29261310 | 17.6632 | 12.4511 | 1.2773  |
| CEU | NPIP | 29266310 | 20.1328 | 14.8389 | 1.0985  |
| CEU | NPIP | 29271310 | 33.0559 | 18.9324 | 2.3212  |
| CEU | NPIP | 29276310 | 44.04   | 19.7852 | 3.8208  |
| CEU | NPIP | 29281310 | 38.7143 | 17.0562 | 3.9346  |
| CEU | NPIP | 29286310 | 34.2791 | 16.0329 | 3.5169  |
| CEU | NPIP | 29291310 | 22.1113 | 11.2571 | 2.9248  |
| CEU | NPIP | 29296310 | 16.087  | 9.3809  | 2.1423  |
| CEU | NPIP | 29301310 | 20.7963 | 13.8156 | 1.5504  |
| CEU | NPIP | 29306310 | 14.8303 | 11.9394 | 0.7371  |
| CEU | NPIP | 29311310 | 10.6914 | 10.0632 | 0.188   |
| CEU | NPIP | 29316310 | 14.5966 | 12.9627 | 0.3855  |
| CEU | NPIP | 29321310 | 10.7572 | 14.6684 | -0.8206 |
| CEU | NPIP | 29326310 | 6.1424  | 12.9627 | -1.609  |
| CEU | NPIP | 29331310 | 5.805   | 10.2337 | -1.3047 |
| CEU | NPIP | 29336310 | 5.0173  | 9.3809  | -1.394  |
| CEU | NPIP | 29341310 | 8.4568  | 9.8926  | -0.4366 |
| CEU | NPIP | 29346310 | 8.7409  | 10.0632 | -0.3957 |
| CEU | NPIP | 29351310 | 6.5481  | 8.0164  | -0.5423 |
| CEU | NPIP | 29356310 | 6.1022  | 6.3108  | -0.0958 |
| CEU | NPIP | 29361310 | 4.511   | 4.9463  | -0.2483 |
| CEU | NPIP | 29366310 | 3.5539  | 4.7757  | -0.7186 |
| CEU | NPIP | 29371310 | 2.2859  | 3.7524  | -1.0624 |
| CEU | NPIP | 29376310 | 0.1806  | 1.8762  | -2.1588 |
| CEU | NPIP | 29381310 | 1.1387  | 1.7056  | -0.7764 |
| CEU | NPIP | 29386310 | 3.1515  | 2.5584  | 0.5908  |
| CEU | NPIP | 29391310 | 5.4539  | 5.2874  | 0.0895  |
| CEU | NPIP | 29396310 | 4.5065  | 4.7757  | -0.1583 |
| CEU | NPIP | 29401310 | 3.0482  | 4.4346  | -0.8699 |
| CEU | NPIP | 29406310 | 2.9225  | 5.458   | -1.3255 |
| CEU | NPIP | 29411310 | 5.1328  | 7.3342  | -0.882  |
| CEU | NPIP | 29416310 | 6.8157  | 10.0632 | -0.9719 |
| CEU | NPIP | 29421310 | 5.0643  | 8.6987  | -1.2451 |
| CEU | NPIP | 29426310 | 6.1453  | 8.0164  | -0.6911 |
| CEU | NPIP | 29431310 | 4.9278  | 7.3342  | -0.9642 |
| CEU | NPIP | 29436310 | 7.8825  | 10.4043 | -0.7316 |
| CEU | NPIP | 29441310 | 7.8681  | 8.187   | -0.1155 |
| CEU | NPIP | 29446310 | 1.4183  | 2.3879  | -1.0211 |
| CEU | NPIP | 29451310 | 0.2888  | 1.3645  | -1.7403 |
| CEU | NPIP | 29456310 | 0.0402  | 0.3411  | -1.2062 |
| CEU | NPIP | 29461310 | 0.0402  | 0.3411  | -1.2062 |
| CEU | NPIP | 29466310 | 0.0585  | 0.1706  | -0.6659 |
| CEU | NPIP | 29471310 | 0.5955  | 0.6822  | -0.2264 |
| CEU | NPIP | 29476310 | 0.6065  | 0.8528  | -0.5547 |
| CEU | NPIP | 29481310 | 0.1192  | 0.5117  | -1.231  |

## 2\_TajimasD\_data

|     |      |          |        |        |         |
|-----|------|----------|--------|--------|---------|
| CEU | NPIP | 29486310 | 0.0497 | 0.1706 | -0.7182 |
| CEU | NPIP | 29491310 | 1.0458 | 0.5117 | 1.6751  |
| CEU | NPIP | 29496310 | 1.0559 | 0.6822 | 0.9758  |
| CEU | NPIP | 29501310 | 0.0693 | 0.3411 | -1.0896 |
| CEU | NPIP | 29506310 | 0.1097 | 0.6822 | -1.495  |
| CEU | NPIP | 29511310 | 5.127  | 2.3879 | 2.8846  |
| CEU | NPIP | 29516310 | 5.3344 | 2.0467 | 3.912   |
| CEU | NPIP | 29521310 | 0.2781 | 0.5117 | -0.7326 |
| CEU | NPIP | 29526310 | 0.0202 | 0.3411 | -1.2864 |
| CEU | NPIP | 29531310 | 0.0303 | 0.3411 | -1.2459 |
| CEU | NPIP | 29536310 | 0.0505 | 0.6822 | -1.6496 |
| CEU | NPIP | 29541310 | 0.0303 | 0.5117 | -1.5098 |
| CEU | NPIP | 29546310 | 0.9911 | 0.6822 | 0.8066  |
| CEU | NPIP | 29551310 | 0.981  | 0.5117 | 1.4718  |
| CEU | NPIP | 29556310 | 1.2344 | 0.8528 | 0.8593  |
| CEU | NPIP | 29561310 | 1.6228 | 2.0467 | -0.5044 |
| CEU | NPIP | 29566310 | 1.0921 | 2.3879 | -1.3646 |
| CEU | NPIP | 29571310 | 1.8563 | 2.8996 | -0.9383 |
| CEU | NPIP | 29576310 | 3.2    | 3.4112 | -0.1659 |
| CEU | NPIP | 29581310 | 4.7372 | 3.2407 | 1.2271  |
| CEU | NPIP | 29586310 | 3.9291 | 3.2407 | 0.5645  |
| CEU | NPIP | 29591310 | 3.0478 | 5.458  | -1.26   |
| CEU | NPIP | 29596310 | 2.9874 | 6.4814 | -1.5661 |
| CEU | NPIP | 29601310 | 4.4851 | 5.6286 | -0.5817 |
| CEU | NPIP | 29606310 | 6.6302 | 6.8225 | -0.0823 |
| CEU | NPIP | 29611310 | 6.63   | 8.0164 | -0.5121 |
| CEU | NPIP | 29616310 | 4.6652 | 6.6519 | -0.8698 |
| CEU | NPIP | 29621310 | 2.3843 | 5.1169 | -1.5125 |
| CEU | NPIP | 29626310 | 2.867  | 5.2874 | -1.3015 |
| CEU | NPIP | 29631310 | 2.7217 | 5.1169 | -1.3258 |
| CEU | NPIP | 29636310 | 3.5619 | 4.9463 | -0.7895 |
| CEU | NPIP | 29641310 | 10.021 | 6.1402 | 1.8262  |
| CEU | NPIP | 29646310 | 9.4197 | 5.6286 | 1.9284  |
| CEU | NPIP | 29651310 | 6.0175 | 5.7991 | 0.1082  |
| CEU | NPIP | 29656310 | 7.6155 | 6.8225 | 0.3393  |
| CEU | NPIP | 29661310 | 5.879  | 5.6286 | 0.1274  |
| CEU | NPIP | 29666310 | 7.141  | 7.3342 | -0.0774 |
| CEU | NPIP | 29671310 | 7.8227 | 8.187  | -0.132  |
| CEU | NPIP | 29676310 | 7.5776 | 7.5047 | 0.0286  |
| CEU | NPIP | 29681310 | 9.6219 | 8.3576 | 0.4494  |
| CEU | NPIP | 29686310 | 7.7077 | 6.8225 | 0.3788  |
| CEU | NPIP | 29691310 | 8.2313 | 5.9697 | 1.0915  |
| CEU | NPIP | 29696310 | 8.2758 | 6.3108 | 0.9022  |
| CEU | NPIP | 29701310 | 5.0653 | 6.1402 | -0.5058 |
| CEU | NPIP | 29706310 | 3.4341 | 5.6286 | -1.1163 |
| CEU | NPIP | 29711310 | 4.3335 | 6.3108 | -0.9078 |
| CEU | NPIP | 29716310 | 5.5261 | 6.1402 | -0.289  |
| CEU | NPIP | 29721310 | 5.7689 | 6.4814 | -0.3194 |
| CEU | NPIP | 29726310 | 5.1655 | 7.6753 | -0.9647 |

## 2\_TajimasD\_data

|     |      |          |        |        |         |
|-----|------|----------|--------|--------|---------|
| CEU | NPIP | 29731310 | 5.2096 | 8.187  | -1.0786 |
| CEU | NPIP | 29736310 | 5.6996 | 7.5047 | -0.7082 |
| CEU | NPIP | 29741310 | 5.2517 | 6.4814 | -0.5512 |
| CEU | NPIP | 29746310 | 7.5102 | 7.8459 | -0.1265 |
| CEU | NPIP | 29751310 | 7.1472 | 7.6753 | -0.203  |
| CEU | NPIP | 29756310 | 3.7333 | 7.6753 | -1.5152 |
| CEU | NPIP | 29761310 | 5.1235 | 9.2104 | -1.328  |
| CEU | NPIP | 29766310 | 4.262  | 7.3342 | -1.2309 |
| CEU | NPIP | 29771310 | 0.8283 | 6.3108 | -2.5171 |
| CEU | NPIP | 29776310 | 1.457  | 6.9931 | -2.3164 |
| CEU | NPIP | 29781310 | 1.6939 | 5.2874 | -1.9322 |
| CEU | NPIP | 29786310 | 2.1177 | 5.9697 | -1.859  |
| CEU | NPIP | 29791310 | 2.0499 | 6.9931 | -2.0683 |
| CEU | NPIP | 29796310 | 1.458  | 5.458  | -2.0911 |
| CEU | NPIP | 29801310 | 1.0412 | 4.6052 | -2.1639 |
| CEU | NPIP | 29806310 | 0.9163 | 4.2641 | -2.1732 |
| CEU | NPIP | 29811310 | 0.6733 | 3.0701 | -2.0559 |
| CEU | NPIP | 29816310 | 0.677  | 4.6052 | -2.385  |
| CEU | NPIP | 29821310 | 0.9136 | 6.4814 | -2.4956 |
| CEU | NPIP | 29826310 | 2.5412 | 6.9931 | -1.8628 |
| CEU | NPIP | 29831310 | 5.0879 | 8.0164 | -1.0817 |
| CEU | NPIP | 29836310 | 4.7231 | 6.3108 | -0.7289 |
| CEU | NPIP | 29841310 | 3.8844 | 4.2641 | -0.2465 |
| CEU | NPIP | 29846310 | 3.6693 | 4.6052 | -0.5682 |
| CEU | NPIP | 29851310 | 2.3185 | 4.9463 | -1.4986 |
| CEU | NPIP | 29856310 | 2.6759 | 5.2874 | -1.4042 |
| CEU | NPIP | 29861310 | 3.147  | 4.7757 | -0.9579 |
| CEU | NPIP | 29866310 | 2.8242 | 3.9229 | -0.7663 |
| CEU | NPIP | 29871310 | 3.3875 | 4.0935 | -0.4747 |
| CEU | NPIP | 29876310 | 4.8631 | 5.9697 | -0.5341 |
| CEU | NPIP | 29881310 | 5.0672 | 5.458  | -0.2043 |
| CEU | NPIP | 29886310 | 2.7394 | 4.2641 | -0.9897 |
| CEU | NPIP | 29891310 | 2.6961 | 5.9697 | -1.5799 |
| CEU | NPIP | 29896310 | 4.0373 | 6.8225 | -1.1918 |
| CEU | NPIP | 29901310 | 3.899  | 6.1402 | -1.0546 |
| CHB | NPIP | 28886310 | 5.0147 | 8.6402 | -1.2462 |
| CHB | NPIP | 28891310 | 5.885  | 8.3013 | -0.8618 |
| CHB | NPIP | 28896310 | 5.272  | 6.7766 | -0.6459 |
| CHB | NPIP | 28901310 | 5.2145 | 8.1319 | -1.0604 |
| CHB | NPIP | 28906310 | 5.3564 | 7.6237 | -0.8743 |
| CHB | NPIP | 28911310 | 4.4245 | 8.1319 | -1.3475 |
| CHB | NPIP | 28916310 | 4.4691 | 8.8096 | -1.4655 |
| CHB | NPIP | 28921310 | 4.0929 | 8.6402 | -1.5631 |
| CHB | NPIP | 28926310 | 6.5648 | 8.8096 | -0.7579 |
| CHB | NPIP | 28931310 | 6.617  | 6.4378 | 0.0806  |
| CHB | NPIP | 28936310 | 4.3033 | 6.0989 | -0.8476 |
| CHB | NPIP | 28941310 | 4.6707 | 6.6072 | -0.8505 |
| CHB | NPIP | 28946310 | 3.3404 | 5.7601 | -1.2022 |
| CHB | NPIP | 28951310 | 3.831  | 6.0989 | -1.0705 |

## 2\_TajimasD\_data

|     |      |          |         |         |         |
|-----|------|----------|---------|---------|---------|
| CHB | NPIP | 28956310 | 6.7082  | 7.4543  | -0.2937 |
| CHB | NPIP | 28961310 | 7.114   | 6.946   | 0.0705  |
| CHB | NPIP | 28966310 | 6.676   | 6.7766  | -0.0432 |
| CHB | NPIP | 28971310 | 5.4809  | 7.9625  | -0.9196 |
| CHB | NPIP | 28976310 | 5.288   | 8.1319  | -1.0337 |
| CHB | NPIP | 28981310 | 6.4527  | 8.3013  | -0.6593 |
| CHB | NPIP | 28986310 | 6.2507  | 8.1319  | -0.6838 |
| CHB | NPIP | 28991310 | 5.6768  | 7.4543  | -0.6997 |
| CHB | NPIP | 28996310 | 5.1694  | 7.4543  | -0.8994 |
| CHB | NPIP | 29001310 | 6.135   | 8.979   | -0.9434 |
| CHB | NPIP | 29006310 | 6.7544  | 9.9955  | -0.9732 |
| CHB | NPIP | 29011310 | 7.4108  | 9.3178  | -0.6113 |
| CHB | NPIP | 29016310 | 7.0072  | 7.9625  | -0.354  |
| CHB | NPIP | 29021310 | 7.2861  | 7.6237  | -0.1302 |
| CHB | NPIP | 29026310 | 9.8995  | 9.3178  | 0.1865  |
| CHB | NPIP | 29031310 | 8.0874  | 9.1484  | -0.3459 |
| CHB | NPIP | 29036310 | 6.1957  | 8.3013  | -0.751  |
| CHB | NPIP | 29041310 | 4.8839  | 6.4378  | -0.6987 |
| CHB | NPIP | 29046310 | 2.7097  | 3.3883  | -0.5344 |
| CHB | NPIP | 29051310 | 1.2559  | 1.1859  | 0.1249  |
| CHB | NPIP | 29056310 | 3.5413  | 3.5577  | -0.0124 |
| CHB | NPIP | 29061310 | 5.5143  | 5.7601  | -0.1221 |
| CHB | NPIP | 29066310 | 3.5267  | 3.2189  | 0.2531  |
| CHB | NPIP | 29071310 | 3.8629  | 3.2189  | 0.5295  |
| CHB | NPIP | 29076310 | 4.2145  | 3.8965  | 0.2224  |
| CHB | NPIP | 29081310 | 5.2798  | 4.5742  | 0.4297  |
| CHB | NPIP | 29086310 | 4.7259  | 5.5907  | -0.4412 |
| CHB | NPIP | 29091310 | 4.9497  | 6.4378  | -0.6691 |
| CHB | NPIP | 29096310 | 5.2482  | 7.6237  | -0.9161 |
| CHB | NPIP | 29101310 | 6.1462  | 9.6567  | -1.0885 |
| CHB | NPIP | 29106310 | 6.7874  | 9.3178  | -0.8111 |
| CHB | NPIP | 29111310 | 7.3242  | 8.4708  | -0.4014 |
| CHB | NPIP | 29116310 | 9.3185  | 9.8261  | -0.1549 |
| CHB | NPIP | 29121310 | 7.3859  | 7.7931  | -0.1539 |
| CHB | NPIP | 29126310 | 11.6792 | 10.1649 | 0.4476  |
| CHB | NPIP | 29131310 | 18.7213 | 13.7226 | 1.1141  |
| CHB | NPIP | 29136310 | 23.8951 | 14.7391 | 1.9067  |
| CHB | NPIP | 29141310 | 23.5254 | 15.4168 | 1.6178  |
| CHB | NPIP | 29146310 | 18.5753 | 14.2309 | 0.9354  |
| CHB | NPIP | 29151310 | 21.6958 | 16.9415 | 0.8668  |
| CHB | NPIP | 29156310 | 24.5791 | 17.4498 | 1.2635  |
| CHB | NPIP | 29161310 | 18.666  | 14.7391 | 0.8178  |
| CHB | NPIP | 29166310 | 10.0898 | 13.892  | -0.8376 |
| CHB | NPIP | 29171310 | 5.1196  | 10.1649 | -1.4915 |
| CHB | NPIP | 29176310 | 4.4377  | 8.979   | -1.5065 |
| CHB | NPIP | 29181310 | 5.293   | 14.2309 | -1.9245 |
| CHB | NPIP | 29186310 | 14.1133 | 17.4498 | -0.5913 |
| CHB | NPIP | 29191310 | 19.2677 | 16.6027 | 0.4954  |
| CHB | NPIP | 29196310 | 11.463  | 12.8755 | -0.3344 |



## 2\_TajimasD\_data

|     |      |          |         |         |         |
|-----|------|----------|---------|---------|---------|
| CHB | NPIP | 29201310 | 7.6817  | 10.1649 | -0.7341 |
| CHB | NPIP | 29206310 | 8.1993  | 10.6731 | -0.6987 |
| CHB | NPIP | 29211310 | 11.3408 | 16.6027 | -0.9781 |
| CHB | NPIP | 29216310 | 9.8976  | 15.7556 | -1.1448 |
| CHB | NPIP | 29221310 | 7.3164  | 9.3178  | -0.6415 |
| CHB | NPIP | 29226310 | 9.1527  | 8.8096  | 0.1158  |
| CHB | NPIP | 29231310 | 13.0765 | 10.6731 | 0.6788  |
| CHB | NPIP | 29236310 | 17.2859 | 16.7721 | 0.0946  |
| CHB | NPIP | 29241310 | 13.6916 | 16.6027 | -0.5411 |
| CHB | NPIP | 29246310 | 12.1953 | 11.6896 | 0.1311  |
| CHB | NPIP | 29251310 | 13.8738 | 10.3343 | 1.0303  |
| CHB | NPIP | 29256310 | 15.0788 | 10.6731 | 1.2443  |
| CHB | NPIP | 29261310 | 17.2895 | 13.045  | 0.9925  |
| CHB | NPIP | 29266310 | 18.7836 | 17.1109 | 0.3021  |
| CHB | NPIP | 29271310 | 29.8641 | 22.1934 | 1.0785  |
| CHB | NPIP | 29276310 | 41.2884 | 25.0734 | 2.0257  |
| CHB | NPIP | 29281310 | 39.7476 | 24.7346 | 1.9004  |
| CHB | NPIP | 29286310 | 35.2127 | 20.8381 | 2.1479  |
| CHB | NPIP | 29291310 | 22.1327 | 14.4003 | 1.6463  |
| CHB | NPIP | 29296310 | 18.6873 | 15.2474 | 0.6936  |
| CHB | NPIP | 29301310 | 27.6779 | 23.8875 | 0.4963  |
| CHB | NPIP | 29306310 | 20.8633 | 20.4992 | 0.0553  |
| CHB | NPIP | 29311310 | 12.2692 | 12.0285 | 0.0608  |
| CHB | NPIP | 29316310 | 16.9231 | 14.0615 | 0.6232  |
| CHB | NPIP | 29321310 | 19.1848 | 16.9415 | 0.409   |
| CHB | NPIP | 29326310 | 13.3516 | 15.0779 | -0.3518 |
| CHB | NPIP | 29331310 | 7.4375  | 11.012  | -0.9805 |
| CHB | NPIP | 29336310 | 5.8039  | 8.4708  | -0.9336 |
| CHB | NPIP | 29341310 | 11.5003 | 9.3178  | 0.6996  |
| CHB | NPIP | 29346310 | 12.838  | 9.4872  | 1.0562  |
| CHB | NPIP | 29351310 | 9.0727  | 7.7931  | 0.4836  |
| CHB | NPIP | 29356310 | 6.7196  | 7.2848  | -0.2272 |
| CHB | NPIP | 29361310 | 4.1976  | 5.2519  | -0.5686 |
| CHB | NPIP | 29366310 | 4.5631  | 5.4213  | -0.45   |
| CHB | NPIP | 29371310 | 2.9425  | 3.8965  | -0.6672 |
| CHB | NPIP | 29376310 | 0.5909  | 1.6942  | -1.5142 |
| CHB | NPIP | 29381310 | 1.8054  | 2.8801  | -0.969  |
| CHB | NPIP | 29386310 | 3.3585  | 3.7271  | -0.2678 |
| CHB | NPIP | 29391310 | 5.5155  | 6.2684  | -0.3468 |
| CHB | NPIP | 29396310 | 5.1338  | 4.913   | 0.1263  |
| CHB | NPIP | 29401310 | 4.2656  | 4.913   | -0.3703 |
| CHB | NPIP | 29406310 | 4.3575  | 6.0989  | -0.822  |
| CHB | NPIP | 29411310 | 7.5134  | 8.6402  | -0.3873 |
| CHB | NPIP | 29416310 | 8.4148  | 11.1814 | -0.7481 |
| CHB | NPIP | 29421310 | 4.8462  | 7.9625  | -1.1548 |
| CHB | NPIP | 29426310 | 5.4409  | 6.7766  | -0.5734 |
| CHB | NPIP | 29431310 | 4.4722  | 6.4378  | -0.8838 |
| CHB | NPIP | 29436310 | 6.6635  | 9.3178  | -0.8508 |
| CHB | NPIP | 29441310 | 6.8241  | 7.7931  | -0.3662 |

## 2\_TajimasD\_data

|     |      |          |         |        |         |
|-----|------|----------|---------|--------|---------|
| CHB | NPIP | 29446310 | 1.36    | 2.033  | -0.8026 |
| CHB | NPIP | 29451310 | 0.0678  | 0.6777 | -1.5945 |
| CHB | NPIP | 29456310 | 0.0192  | 0.1694 | -0.8925 |
| CHB | NPIP | 29461310 | 0.1055  | 0.6777 | -1.4959 |
| CHB | NPIP | 29466310 | 0.0862  | 0.5082 | -1.3247 |
| CHB | NPIP | 29471310 | 0.5408  | 0.6777 | -0.3579 |
| CHB | NPIP | 29476310 | 0.6156  | 1.1859 | -1.018  |
| CHB | NPIP | 29481310 | 0.2454  | 0.8471 | -1.3568 |
| CHB | NPIP | 29486310 | 0.19    | 0.5082 | -0.9989 |
| CHB | NPIP | 29491310 | 0.0485  | 0.6777 | -1.6449 |
| CHB | NPIP | 29496310 | 0.3564  | 1.1859 | -1.4806 |
| CHB | NPIP | 29501310 | 0.6851  | 1.1859 | -0.8939 |
| CHB | NPIP | 29506310 | 0.7002  | 1.1859 | -0.867  |
| CHB | NPIP | 29511310 | 4.999   | 2.5412 | 2.4543  |
| CHB | NPIP | 29516310 | 4.8787  | 2.033  | 3.3935  |
| CHB | NPIP | 29521310 | 0.2701  | 0.6777 | -1.0656 |
| CHB | NPIP | 29526310 | 0.0482  | 0.5082 | -1.444  |
| CHB | NPIP | 29531310 | 0.0967  | 0.6777 | -1.5189 |
| CHB | NPIP | 29536310 | 0.0967  | 0.6777 | -1.5189 |
| CHB | NPIP | 29541310 | 0.0097  | 0.1694 | -0.949  |
| CHB | NPIP | 29546310 | 0.8397  | 0.5082 | 1.0406  |
| CHB | NPIP | 29551310 | 0.83    | 0.3388 | 1.9704  |
| CHB | NPIP | 29556310 | 0.7752  | 1.5247 | -1.1135 |
| CHB | NPIP | 29561310 | 1.7653  | 2.8801 | -1.0051 |
| CHB | NPIP | 29566310 | 2.6269  | 3.0495 | -0.3634 |
| CHB | NPIP | 29571310 | 2.9149  | 2.8801 | 0.0314  |
| CHB | NPIP | 29576310 | 2.5505  | 1.8636 | 0.8764  |
| CHB | NPIP | 29581310 | 2.7398  | 3.2189 | -0.3939 |
| CHB | NPIP | 29586310 | 2.6273  | 4.7436 | -1.2484 |
| CHB | NPIP | 29591310 | 3.2671  | 5.9295 | -1.2889 |
| CHB | NPIP | 29596310 | 3.5294  | 7.1154 | -1.4727 |
| CHB | NPIP | 29601310 | 4.5601  | 6.946  | -1.0015 |
| CHB | NPIP | 29606310 | 5.3006  | 6.6072 | -0.5739 |
| CHB | NPIP | 29611310 | 4.0815  | 5.7601 | -0.834  |
| CHB | NPIP | 29616310 | 2.6314  | 6.4378 | -1.7115 |
| CHB | NPIP | 29621310 | 1.9819  | 5.7601 | -1.8771 |
| CHB | NPIP | 29626310 | 2.1921  | 4.5742 | -1.4505 |
| CHB | NPIP | 29631310 | 1.6632  | 5.0825 | -1.8983 |
| CHB | NPIP | 29636310 | 2.4003  | 6.4378 | -1.8154 |
| CHB | NPIP | 29641310 | 4.4458  | 7.4543 | -1.1842 |
| CHB | NPIP | 29646310 | 3.7165  | 6.7766 | -1.3136 |
| CHB | NPIP | 29651310 | 6.7942  | 7.7931 | -0.3775 |
| CHB | NPIP | 29656310 | 10.5073 | 7.9625 | 0.943   |
| CHB | NPIP | 29661310 | 7.198   | 7.9625 | -0.2833 |
| CHB | NPIP | 29666310 | 8.7514  | 8.8096 | -0.0196 |
| CHB | NPIP | 29671310 | 11.0356 | 8.1319 | 1.0554  |
| CHB | NPIP | 29676310 | 8.8587  | 7.2848 | 0.6327  |
| CHB | NPIP | 29681310 | 8.0329  | 7.4543 | 0.2278  |
| CHB | NPIP | 29686310 | 6.9162  | 6.2684 | 0.2984  |

## 2\_TajimasD\_data

|     |      |          |        |         |         |
|-----|------|----------|--------|---------|---------|
| CHB | NPIP | 29691310 | 8.3929 | 7.1154  | 0.5246  |
| CHB | NPIP | 29696310 | 7.06   | 7.4543  | -0.1552 |
| CHB | NPIP | 29701310 | 2.5248 | 5.7601  | -1.6074 |
| CHB | NPIP | 29706310 | 1.6088 | 6.4378  | -2.1713 |
| CHB | NPIP | 29711310 | 2.4517 | 6.946   | -1.8865 |
| CHB | NPIP | 29716310 | 3.6286 | 9.8261  | -1.8909 |
| CHB | NPIP | 29721310 | 3.9541 | 9.6567  | -1.7683 |
| CHB | NPIP | 29726310 | 3.1531 | 7.6237  | -1.724  |
| CHB | NPIP | 29731310 | 2.6482 | 9.9955  | -2.2063 |
| CHB | NPIP | 29736310 | 2.5663 | 9.1484  | -2.146  |
| CHB | NPIP | 29741310 | 2.7925 | 6.946   | -1.7435 |
| CHB | NPIP | 29746310 | 5.6238 | 9.1484  | -1.1492 |
| CHB | NPIP | 29751310 | 5.8599 | 10.5037 | -1.3314 |
| CHB | NPIP | 29756310 | 3.1784 | 9.3178  | -1.9679 |
| CHB | NPIP | 29761310 | 4.4034 | 9.8261  | -1.6545 |
| CHB | NPIP | 29766310 | 4.4647 | 10.3343 | -1.7086 |
| CHB | NPIP | 29771310 | 2.3906 | 10.3343 | -2.3123 |
| CHB | NPIP | 29776310 | 2.339  | 10.5037 | -2.3408 |
| CHB | NPIP | 29781310 | 2.0782 | 7.1154  | -2.0686 |
| CHB | NPIP | 29786310 | 3.1643 | 6.6072  | -1.5122 |
| CHB | NPIP | 29791310 | 3.5117 | 9.1484  | -1.8378 |
| CHB | NPIP | 29796310 | 2.5243 | 8.3013  | -2.0603 |
| CHB | NPIP | 29801310 | 1.6716 | 6.946   | -2.214  |
| CHB | NPIP | 29806310 | 0.9895 | 5.4213  | -2.3239 |
| CHB | NPIP | 29811310 | 0.9834 | 3.5577  | -1.9455 |
| CHB | NPIP | 29816310 | 1.0375 | 5.4213  | -2.2987 |
| CHB | NPIP | 29821310 | 1.086  | 7.1154  | -2.4761 |
| CHB | NPIP | 29826310 | 2.1498 | 7.7931  | -2.1329 |
| CHB | NPIP | 29831310 | 3.4982 | 7.4543  | -1.5572 |
| CHB | NPIP | 29836310 | 3.1222 | 6.2684  | -1.449  |
| CHB | NPIP | 29841310 | 2.3611 | 6.4378  | -1.833  |
| CHB | NPIP | 29846310 | 1.9994 | 5.7601  | -1.8684 |
| CHB | NPIP | 29851310 | 1.4091 | 5.0825  | -2.0394 |
| CHB | NPIP | 29856310 | 1.4626 | 6.0989  | -2.1885 |
| CHB | NPIP | 29861310 | 2.1106 | 7.2848  | -2.0799 |
| CHB | NPIP | 29866310 | 2.3845 | 6.6072  | -1.8547 |
| CHB | NPIP | 29871310 | 2.0489 | 6.0989  | -1.9118 |
| CHB | NPIP | 29876310 | 2.3482 | 7.1154  | -1.9577 |
| CHB | NPIP | 29881310 | 2.8945 | 6.2684  | -1.5539 |
| CHB | NPIP | 29886310 | 3.9259 | 5.0825  | -0.6421 |
| CHB | NPIP | 29891310 | 7.0539 | 5.5907  | 0.7466  |
| CHB | NPIP | 29896310 | 8.1005 | 6.0989  | 0.9448  |
| CHB | NPIP | 29901310 | 6.2964 | 5.9295  | 0.1776  |
| YRI | NPIP | 28886310 | 5.5179 | 6.5544  | -0.457  |
| YRI | NPIP | 28891310 | 7.0942 | 8.4031  | -0.46   |
| YRI | NPIP | 28896310 | 7.0551 | 8.7392  | -0.5709 |
| YRI | NPIP | 28901310 | 5.9285 | 7.7309  | -0.6839 |
| YRI | NPIP | 28906310 | 6.421  | 9.5795  | -0.9833 |
| YRI | NPIP | 28911310 | 5.182  | 9.5795  | -1.3691 |

## 2\_TajimasD\_data

|     |      |          |         |         |         |
|-----|------|----------|---------|---------|---------|
| YRI | NPIP | 28916310 | 4.4482  | 8.7392  | -1.4545 |
| YRI | NPIP | 28921310 | 4.3671  | 8.7392  | -1.482  |
| YRI | NPIP | 28926310 | 7.4733  | 9.4115  | -0.6134 |
| YRI | NPIP | 28931310 | 8.2585  | 8.4031  | -0.0508 |
| YRI | NPIP | 28936310 | 5.5429  | 7.2267  | -0.6794 |
| YRI | NPIP | 28941310 | 5.1962  | 8.067   | -1.0476 |
| YRI | NPIP | 28946310 | 3.5608  | 8.235   | -1.6736 |
| YRI | NPIP | 28951310 | 3.7705  | 7.2267  | -1.3946 |
| YRI | NPIP | 28956310 | 7.8964  | 10.2518 | -0.6884 |
| YRI | NPIP | 28961310 | 8.3101  | 11.7644 | -0.8874 |
| YRI | NPIP | 28966310 | 7.5849  | 10.5879 | -0.8516 |
| YRI | NPIP | 28971310 | 7.7285  | 11.0921 | -0.9132 |
| YRI | NPIP | 28976310 | 5.9232  | 10.2518 | -1.2651 |
| YRI | NPIP | 28981310 | 8.0838  | 11.5963 | -0.9147 |
| YRI | NPIP | 28986310 | 9.2782  | 12.4366 | -0.77   |
| YRI | NPIP | 28991310 | 7.2739  | 10.2518 | -0.8704 |
| YRI | NPIP | 28996310 | 7.192   | 9.4115  | -0.7025 |
| YRI | NPIP | 29001310 | 12.1322 | 12.2685 | -0.0337 |
| YRI | NPIP | 29006310 | 11.8245 | 14.1172 | -0.4957 |
| YRI | NPIP | 29011310 | 8.5886  | 12.2685 | -0.9087 |
| YRI | NPIP | 29016310 | 8.3099  | 10.756  | -0.6836 |
| YRI | NPIP | 29021310 | 7.6804  | 10.924  | -0.8933 |
| YRI | NPIP | 29026310 | 10.7549 | 12.4366 | -0.41   |
| YRI | NPIP | 29031310 | 10.3391 | 11.4282 | -0.2875 |
| YRI | NPIP | 29036310 | 8.0819  | 9.5795  | -0.4663 |
| YRI | NPIP | 29041310 | 5.5019  | 9.2434  | -1.2041 |
| YRI | NPIP | 29046310 | 3.288   | 7.2267  | -1.5893 |
| YRI | NPIP | 29051310 | 1.9407  | 3.0251  | -0.9355 |
| YRI | NPIP | 29056310 | 3.47    | 3.1932  | 0.2283  |
| YRI | NPIP | 29061310 | 6.2329  | 6.7225  | -0.211  |
| YRI | NPIP | 29066310 | 5.0142  | 5.5461  | -0.2724 |
| YRI | NPIP | 29071310 | 4.2291  | 5.5461  | -0.6744 |
| YRI | NPIP | 29076310 | 3.8089  | 5.5461  | -0.8896 |
| YRI | NPIP | 29081310 | 4.7043  | 6.2183  | -0.6999 |
| YRI | NPIP | 29086310 | 5.6134  | 8.067   | -0.8953 |
| YRI | NPIP | 29091310 | 7.7709  | 9.5795  | -0.5631 |
| YRI | NPIP | 29096310 | 7.2949  | 11.9324 | -1.1756 |
| YRI | NPIP | 29101310 | 7.4419  | 13.7811 | -1.4024 |
| YRI | NPIP | 29106310 | 8.6104  | 10.756  | -0.5996 |
| YRI | NPIP | 29111310 | 10.1907 | 10.4199 | -0.066  |
| YRI | NPIP | 29116310 | 12.8508 | 15.1256 | -0.4606 |
| YRI | NPIP | 29121310 | 9.8069  | 13.1089 | -0.766  |
| YRI | NPIP | 29126310 | 13.0879 | 14.7895 | -0.352  |
| YRI | NPIP | 29131310 | 17.9881 | 17.6465 | 0.0597  |
| YRI | NPIP | 29136310 | 19.6822 | 18.3188 | 0.2299  |
| YRI | NPIP | 29141310 | 20.9755 | 21.68   | -0.101  |
| YRI | NPIP | 29146310 | 18.0105 | 21.1758 | -0.4641 |
| YRI | NPIP | 29151310 | 16.8313 | 21.1758 | -0.637  |
| YRI | NPIP | 29156310 | 15.922  | 20.8397 | -0.7323 |

## 2\_TajimasD\_data

|     |      |          |         |         |         |
|-----|------|----------|---------|---------|---------|
| YRI | NPIP | 29161310 | 16.3454 | 20.1675 | -0.5874 |
| YRI | NPIP | 29166310 | 16.3672 | 23.6968 | -0.9639 |
| YRI | NPIP | 29171310 | 11.0185 | 20.3355 | -1.4205 |
| YRI | NPIP | 29176310 | 10.7641 | 17.1423 | -1.146  |
| YRI | NPIP | 29181310 | 13.3835 | 17.6465 | -0.7449 |
| YRI | NPIP | 29186310 | 18.2726 | 17.8146 | 0.0793  |
| YRI | NPIP | 29191310 | 18.8903 | 19.1591 | -0.0434 |
| YRI | NPIP | 29196310 | 12.4907 | 15.9659 | -0.6683 |
| YRI | NPIP | 29201310 | 11.8028 | 12.6047 | -0.193  |
| YRI | NPIP | 29206310 | 13.5604 | 14.1172 | -0.1204 |
| YRI | NPIP | 29211310 | 20.9876 | 21.1758 | -0.0276 |
| YRI | NPIP | 29216310 | 24.0368 | 21.0078 | 0.4476  |
| YRI | NPIP | 29221310 | 20.6418 | 17.9827 | 0.4563  |
| YRI | NPIP | 29226310 | 15.0679 | 17.1423 | -0.3727 |
| YRI | NPIP | 29231310 | 13.7489 | 15.4617 | -0.3396 |
| YRI | NPIP | 29236310 | 19.0837 | 22.1842 | -0.4346 |
| YRI | NPIP | 29241310 | 20.0293 | 24.8732 | -0.6078 |
| YRI | NPIP | 29246310 | 19.1736 | 19.3272 | -0.0246 |
| YRI | NPIP | 29251310 | 15.5995 | 15.9659 | -0.0705 |
| YRI | NPIP | 29256310 | 15.6729 | 16.134  | -0.0878 |
| YRI | NPIP | 29261310 | 20.0832 | 19.6633 | 0.0661  |
| YRI | NPIP | 29266310 | 25.0996 | 23.6968 | 0.1845  |
| YRI | NPIP | 29271310 | 39.4055 | 27.8983 | 1.2915  |
| YRI | NPIP | 29276310 | 47.8366 | 30.0831 | 1.8515  |
| YRI | NPIP | 29281310 | 43.9107 | 28.0664 | 1.7679  |
| YRI | NPIP | 29286310 | 41.1824 | 26.7219 | 1.6924  |
| YRI | NPIP | 29291310 | 26.2036 | 19.9994 | 0.9613  |
| YRI | NPIP | 29296310 | 21.4087 | 18.991  | 0.3937  |
| YRI | NPIP | 29301310 | 37.5919 | 30.5873 | 0.7187  |
| YRI | NPIP | 29306310 | 33.1126 | 29.9151 | 0.3353  |
| YRI | NPIP | 29311310 | 17.5237 | 18.991  | -0.2389 |
| YRI | NPIP | 29316310 | 16.7531 | 17.8146 | -0.1838 |
| YRI | NPIP | 29321310 | 21.9753 | 22.5203 | -0.0753 |
| YRI | NPIP | 29326310 | 18.709  | 19.4952 | -0.1248 |
| YRI | NPIP | 29331310 | 9.3391  | 14.6214 | -1.1047 |
| YRI | NPIP | 29336310 | 7.0773  | 14.9575 | -1.6127 |
| YRI | NPIP | 29341310 | 11.2246 | 15.9659 | -0.9118 |
| YRI | NPIP | 29346310 | 12.2167 | 16.8062 | -0.8404 |
| YRI | NPIP | 29351310 | 9.8683  | 15.1256 | -1.0646 |
| YRI | NPIP | 29356310 | 7.3512  | 10.2518 | -0.8478 |
| YRI | NPIP | 29361310 | 6.6068  | 8.5712  | -0.6779 |
| YRI | NPIP | 29366310 | 6.5305  | 9.5795  | -0.9493 |
| YRI | NPIP | 29371310 | 3.2532  | 6.2183  | -1.3707 |
| YRI | NPIP | 29376310 | 1.2484  | 3.3612  | -1.6692 |
| YRI | NPIP | 29381310 | 1.8355  | 3.1932  | -1.1197 |
| YRI | NPIP | 29386310 | 2.9611  | 3.6974  | -0.5367 |
| YRI | NPIP | 29391310 | 5.8766  | 7.3947  | -0.5999 |
| YRI | NPIP | 29396310 | 5.6225  | 5.8822  | -0.1262 |
| YRI | NPIP | 29401310 | 3.8338  | 8.235   | -1.5759 |

## 2\_TajimasD\_data

|     |      |          |        |         |         |
|-----|------|----------|--------|---------|---------|
| YRI | NPIP | 29406310 | 4.1073 | 10.756  | -1.858  |
| YRI | NPIP | 29411310 | 6.9562 | 10.756  | -1.0618 |
| YRI | NPIP | 29416310 | 8.0971 | 14.4534 | -1.344  |
| YRI | NPIP | 29421310 | 4.5192 | 12.1005 | -1.8967 |
| YRI | NPIP | 29426310 | 4.0431 | 10.5879 | -1.8561 |
| YRI | NPIP | 29431310 | 4.36   | 11.2602 | -1.8472 |
| YRI | NPIP | 29436310 | 9.3995 | 16.302  | -1.3013 |
| YRI | NPIP | 29441310 | 8.0466 | 12.6047 | -1.0973 |
| YRI | NPIP | 29446310 | 0.5133 | 2.689   | -2.0677 |
| YRI | NPIP | 29451310 | 0.0919 | 0.8403  | -1.6904 |
| YRI | NPIP | 29456310 | 0.0278 | 0.3361  | -1.2377 |
| YRI | NPIP | 29461310 | 0.0278 | 0.3361  | -1.2377 |
| YRI | NPIP | 29466310 | 0.0093 | 0.1681  | -0.944  |
| YRI | NPIP | 29471310 | 0.6211 | 0.8403  | -0.4951 |
| YRI | NPIP | 29476310 | 1.0384 | 1.1764  | -0.2468 |
| YRI | NPIP | 29481310 | 0.523  | 0.6722  | -0.3906 |
| YRI | NPIP | 29486310 | 0.1771 | 0.3361  | -0.6383 |
| YRI | NPIP | 29491310 | 0.1906 | 0.6722  | -1.2608 |
| YRI | NPIP | 29496310 | 0.1831 | 1.3445  | -1.8863 |
| YRI | NPIP | 29501310 | 0.3182 | 1.5126  | -1.7785 |
| YRI | NPIP | 29506310 | 0.346  | 1.5126  | -1.7371 |
| YRI | NPIP | 29511310 | 4.6882 | 2.8571  | 1.6559  |
| YRI | NPIP | 29516310 | 4.715  | 2.5209  | 2.1973  |
| YRI | NPIP | 29521310 | 0.1737 | 1.0084  | -1.6641 |
| YRI | NPIP | 29526310 | 0.0461 | 0.5042  | -1.4397 |
| YRI | NPIP | 29531310 | 0.0093 | 0.1681  | -0.944  |
| YRI | NPIP | 29536310 | 0.0554 | 0.6722  | -1.6147 |
| YRI | NPIP | 29541310 | 0.2394 | 0.8403  | -1.3572 |
| YRI | NPIP | 29546310 | 0.8872 | 1.1764  | -0.5172 |
| YRI | NPIP | 29551310 | 0.6939 | 0.8403  | -0.3307 |
| YRI | NPIP | 29556310 | 1.033  | 3.3612  | -1.8394 |
| YRI | NPIP | 29561310 | 1.8821 | 5.7141  | -1.9108 |
| YRI | NPIP | 29566310 | 1.5662 | 4.3696  | -1.7701 |
| YRI | NPIP | 29571310 | 2.0042 | 4.3696  | -1.4936 |
| YRI | NPIP | 29576310 | 2.3842 | 3.6974  | -0.9572 |
| YRI | NPIP | 29581310 | 3.8501 | 5.2099  | -0.736  |
| YRI | NPIP | 29586310 | 3.9214 | 7.5628  | -1.4097 |
| YRI | NPIP | 29591310 | 4.0059 | 8.4031  | -1.5454 |
| YRI | NPIP | 29596310 | 4.5688 | 9.4115  | -1.5327 |
| YRI | NPIP | 29601310 | 5.9725 | 10.4199 | -1.2803 |
| YRI | NPIP | 29606310 | 6.6227 | 10.2518 | -1.0607 |
| YRI | NPIP | 29611310 | 4.8445 | 8.9073  | -1.3531 |
| YRI | NPIP | 29616310 | 3.9154 | 8.5712  | -1.6067 |
| YRI | NPIP | 29621310 | 2.6934 | 8.5712  | -2.0284 |
| YRI | NPIP | 29626310 | 2.6477 | 8.5712  | -2.0442 |
| YRI | NPIP | 29631310 | 2.7786 | 8.067   | -1.9298 |
| YRI | NPIP | 29636310 | 5.0566 | 9.0754  | -1.3155 |
| YRI | NPIP | 29641310 | 9.7496 | 9.7476  | 0.0006  |
| YRI | NPIP | 29646310 | 9.6476 | 10.5879 | -0.2667 |

## 2\_TajimasD\_data

|     |      |          |         |         |         |
|-----|------|----------|---------|---------|---------|
| YRI | NPIP | 29651310 | 9.1162  | 11.7644 | -0.6803 |
| YRI | NPIP | 29656310 | 11.4429 | 11.4282 | 0.0039  |
| YRI | NPIP | 29661310 | 8.7636  | 10.2518 | -0.435  |
| YRI | NPIP | 29666310 | 10.4169 | 11.7644 | -0.3462 |
| YRI | NPIP | 29671310 | 13.5709 | 13.2769 | 0.0674  |
| YRI | NPIP | 29676310 | 11.9749 | 13.9492 | -0.4318 |
| YRI | NPIP | 29681310 | 11.2984 | 14.6214 | -0.695  |
| YRI | NPIP | 29686310 | 9.248   | 13.1089 | -0.8956 |
| YRI | NPIP | 29691310 | 9.6076  | 12.7727 | -0.7525 |
| YRI | NPIP | 29696310 | 8.1388  | 12.1005 | -0.9911 |
| YRI | NPIP | 29701310 | 5.1554  | 10.756  | -1.5651 |
| YRI | NPIP | 29706310 | 3.974   | 8.9073  | -1.6431 |
| YRI | NPIP | 29711310 | 4.7278  | 10.5879 | -1.6619 |
| YRI | NPIP | 29716310 | 7.7653  | 13.613  | -1.3088 |
| YRI | NPIP | 29721310 | 8.3732  | 11.5963 | -0.8393 |
| YRI | NPIP | 29726310 | 7.1051  | 10.5879 | -0.9877 |
| YRI | NPIP | 29731310 | 9.3413  | 14.2853 | -1.0571 |
| YRI | NPIP | 29736310 | 9.3729  | 13.1089 | -0.8666 |
| YRI | NPIP | 29741310 | 7.1759  | 9.0754  | -0.6218 |
| YRI | NPIP | 29746310 | 11.8086 | 10.756  | 0.2941  |
| YRI | NPIP | 29751310 | 18.8583 | 14.6214 | 0.8861  |
| YRI | NPIP | 29756310 | 16.999  | 14.9575 | 0.4178  |
| YRI | NPIP | 29761310 | 14.4818 | 13.9492 | 0.1165  |
| YRI | NPIP | 29766310 | 15.0695 | 14.9575 | 0.0229  |
| YRI | NPIP | 29771310 | 15.5405 | 17.1423 | -0.2878 |
| YRI | NPIP | 29776310 | 15.4938 | 16.302  | -0.1524 |
| YRI | NPIP | 29781310 | 11.2854 | 12.4366 | -0.2807 |
| YRI | NPIP | 29786310 | 11.6634 | 11.0921 | 0.1551  |
| YRI | NPIP | 29791310 | 13.0852 | 10.924  | 0.5952  |
| YRI | NPIP | 29796310 | 9.501   | 9.5795  | -0.0244 |
| YRI | NPIP | 29801310 | 4.5154  | 7.5628  | -1.1797 |
| YRI | NPIP | 29806310 | 3.7356  | 8.4031  | -1.6404 |
| YRI | NPIP | 29811310 | 4.1861  | 10.0837 | -1.7505 |
| YRI | NPIP | 29816310 | 3.6876  | 10.2518 | -1.9185 |
| YRI | NPIP | 29821310 | 3.5481  | 10.5879 | -1.9965 |
| YRI | NPIP | 29826310 | 6.0722  | 12.1005 | -1.5082 |
| YRI | NPIP | 29831310 | 9.3104  | 12.6047 | -0.793  |
| YRI | NPIP | 29836310 | 8.1238  | 11.9324 | -0.9655 |
| YRI | NPIP | 29841310 | 6.3075  | 9.5795  | -1.0187 |
| YRI | NPIP | 29846310 | 5.3765  | 6.5544  | -0.5193 |
| YRI | NPIP | 29851310 | 3.8924  | 7.3947  | -1.3839 |
| YRI | NPIP | 29856310 | 5.1622  | 9.9157  | -1.4332 |
| YRI | NPIP | 29861310 | 6.3475  | 11.0921 | -1.2882 |
| YRI | NPIP | 29866310 | 6.5487  | 10.924  | -1.205  |
| YRI | NPIP | 29871310 | 5.9026  | 9.4115  | -1.1105 |
| YRI | NPIP | 29876310 | 6.0983  | 11.4282 | -1.4071 |
| YRI | NPIP | 29881310 | 7.0627  | 11.5963 | -1.1806 |
| YRI | NPIP | 29886310 | 6.7456  | 9.7476  | -0.9196 |
| YRI | NPIP | 29891310 | 8.0345  | 10.756  | -0.7605 |

## 2\_TajimasD\_data

|     |      |          |        |        |         |
|-----|------|----------|--------|--------|---------|
| YRI | NPIP | 29896310 | 8.7574 | 9.7476 | -0.3033 |
| YRI | NPIP | 29901310 | 6.9485 | 8.235  | -0.4606 |
| CEU | NPIP | 29727897 | 4.6599 | 8.187  | -1.2778 |
| CEU | NPIP | 29732897 | 5.2919 | 7.5047 | -0.8682 |
| CEU | NPIP | 29737897 | 6.2804 | 6.8225 | -0.232  |
| CEU | NPIP | 29742897 | 5.2657 | 6.8225 | -0.6662 |
| CEU | NPIP | 29747897 | 7.7555 | 8.0164 | -0.0964 |
| CEU | NPIP | 29752897 | 6.3849 | 8.0164 | -0.6026 |
| CEU | NPIP | 29757897 | 3.0435 | 8.187  | -1.8634 |
| CEU | NPIP | 29762897 | 5.2092 | 8.6987 | -1.1955 |
| CEU | NPIP | 29767897 | 4.0851 | 6.4814 | -1.0741 |
| CEU | NPIP | 29772897 | 1.0287 | 6.8225 | -2.4792 |
| CEU | NPIP | 29777897 | 1.3012 | 6.8225 | -2.3626 |
| CEU | NPIP | 29782897 | 1.9058 | 4.9463 | -1.734  |
| CEU | NPIP | 29787897 | 2.0746 | 6.9931 | -2.058  |
| CEU | NPIP | 29792897 | 2.1288 | 6.8225 | -2.0084 |
| CEU | NPIP | 29797897 | 1.4539 | 4.7757 | -1.9537 |
| CEU | NPIP | 29802897 | 0.502  | 4.4346 | -2.4674 |
| CEU | NPIP | 29807897 | 0.8291 | 3.4112 | -2.028  |
| CEU | NPIP | 29812897 | 0.6052 | 3.0701 | -2.1144 |
| CEU | NPIP | 29817897 | 0.7275 | 5.6286 | -2.493  |
| CEU | NPIP | 29822897 | 1.8817 | 7.3342 | -2.1847 |
| CEU | NPIP | 29827897 | 3.0626 | 6.9931 | -1.6446 |
| CEU | NPIP | 29832897 | 4.4035 | 7.3342 | -1.1742 |
| CEU | NPIP | 29837897 | 5.236  | 6.1402 | -0.4255 |
| CEU | NPIP | 29842897 | 3.8571 | 4.2641 | -0.2642 |
| CEU | NPIP | 29847897 | 2.8516 | 4.2641 | -0.9169 |
| CEU | NPIP | 29852897 | 2.3286 | 5.1169 | -1.5434 |
| CEU | NPIP | 29857897 | 3.1387 | 5.1169 | -1.095  |
| CEU | NPIP | 29862897 | 3.5411 | 4.7757 | -0.7261 |
| CEU | NPIP | 29867897 | 2.798  | 4.0935 | -0.8711 |
| CEU | NPIP | 29872897 | 3.2581 | 4.6052 | -0.8179 |
| CEU | NPIP | 29877897 | 5.0136 | 5.6286 | -0.3128 |
| CEU | NPIP | 29882897 | 5.242  | 5.2874 | -0.0244 |
| CEU | NPIP | 29887897 | 2.4708 | 5.1169 | -1.4647 |
| CEU | NPIP | 29892897 | 2.9332 | 5.6286 | -1.371  |
| CEU | NPIP | 29897897 | 4.5725 | 6.3108 | -0.7981 |
| CEU | NPIP | 29902897 | 4.4877 | 6.3108 | -0.837  |
| CEU | NPIP | 29907897 | 6.6564 | 5.2874 | 0.7361  |
| CEU | NPIP | 29912897 | 6.6832 | 4.6052 | 1.2616  |
| CEU | NPIP | 29917897 | 4.8701 | 5.2874 | -0.2244 |
| CEU | NPIP | 29922897 | 6.0023 | 5.9697 | 0.0157  |
| CEU | NPIP | 29927897 | 6.4224 | 5.7991 | 0.3087  |
| CEU | NPIP | 29932897 | 8.1767 | 6.6519 | 0.6676  |
| CEU | NPIP | 29937897 | 7.4966 | 6.6519 | 0.3698  |
| CEU | NPIP | 29942897 | 6.0602 | 5.6286 | 0.2195  |
| CEU | NPIP | 29947897 | 5.6741 | 5.2874 | 0.2079  |
| CEU | NPIP | 29952897 | 3.3416 | 4.4346 | -0.6858 |
| CEU | NPIP | 29957897 | 4.6933 | 5.2874 | -0.3195 |



## 2\_TajimasD\_data

|     |      |          |         |        |         |
|-----|------|----------|---------|--------|---------|
| CEU | NPIP | 29962897 | 5.7857  | 5.1169 | 0.3702  |
| CEU | NPIP | 29967897 | 6.7925  | 4.7757 | 1.1862  |
| CEU | NPIP | 29972897 | 6.0373  | 4.0935 | 1.3071  |
| CEU | NPIP | 29977897 | 5.8081  | 4.2641 | 1.0023  |
| CEU | NPIP | 29982897 | 8.2482  | 6.4814 | 0.7919  |
| CEU | NPIP | 29987897 | 5.2839  | 4.4346 | 0.5329  |
| CEU | NPIP | 29992897 | 5.2352  | 3.9229 | 0.9153  |
| CEU | NPIP | 29997897 | 6.0082  | 5.1169 | 0.4934  |
| CEU | NPIP | 30002897 | 3.3638  | 4.9463 | -0.9025 |
| CEU | NPIP | 30007897 | 3.9064  | 5.9697 | -0.9958 |
| CEU | NPIP | 30012897 | 7.9262  | 8.6987 | -0.2647 |
| CEU | NPIP | 30017897 | 8.8071  | 8.0164 | 0.292   |
| CEU | NPIP | 30022897 | 7.3191  | 4.9463 | 1.3532  |
| CEU | NPIP | 30027897 | 7.3529  | 5.2874 | 1.1106  |
| CEU | NPIP | 30032897 | 7.5857  | 6.9931 | 0.248   |
| CEU | NPIP | 30037897 | 7.4529  | 6.9931 | 0.1924  |
| CEU | NPIP | 30042897 | 6.887   | 4.9463 | 1.1068  |
| CEU | NPIP | 30047897 | 9.3781  | 5.7991 | 1.7727  |
| CEU | NPIP | 30052897 | 8.476   | 6.1402 | 1.0992  |
| CEU | NPIP | 30057897 | 5.5962  | 5.2874 | 0.166   |
| CEU | NPIP | 30062897 | 5.608   | 6.1402 | -0.2504 |
| CEU | NPIP | 30067897 | 4.4895  | 5.7991 | -0.6486 |
| CEU | NPIP | 30072897 | 2.1697  | 4.2641 | -1.3596 |
| CEU | NPIP | 30077897 | 2.2727  | 4.2641 | -1.2927 |
| CEU | NPIP | 30082897 | 2.8771  | 4.7757 | -1.1166 |
| CEU | NPIP | 30087897 | 3.0146  | 5.1169 | -1.1637 |
| CEU | NPIP | 30092897 | 5.1789  | 6.6519 | -0.6449 |
| CEU | NPIP | 30097897 | 5.0773  | 7.1636 | -0.854  |
| CEU | NPIP | 30102897 | 3.7365  | 6.1402 | -1.1311 |
| CEU | NPIP | 30107897 | 2.7654  | 4.9463 | -1.2438 |
| CEU | NPIP | 30112897 | 2.3989  | 4.7757 | -1.3979 |
| CEU | NPIP | 30117897 | 6.4869  | 7.8459 | -0.512  |
| CEU | NPIP | 30122897 | 6.9615  | 7.3342 | -0.1493 |
| CEU | NPIP | 30127897 | 3.3944  | 4.6052 | -0.7351 |
| CEU | NPIP | 30132897 | 3.348   | 4.7757 | -0.8397 |
| CEU | NPIP | 30137897 | 6.1276  | 6.4814 | -0.1586 |
| CEU | NPIP | 30142897 | 6.1072  | 6.8225 | -0.3061 |
| CEU | NPIP | 30147897 | 3.0388  | 5.1169 | -1.1503 |
| CEU | NPIP | 30152897 | 5.5537  | 6.9931 | -0.6023 |
| CEU | NPIP | 30157897 | 8.0239  | 7.5047 | 0.2037  |
| CEU | NPIP | 30162897 | 10.9984 | 7.6753 | 1.2773  |
| CEU | NPIP | 30167897 | 11.0763 | 8.0164 | 1.1302  |
| CEU | NPIP | 30172897 | 6.1082  | 5.7991 | 0.1531  |
| CEU | NPIP | 30177897 | 5.7947  | 5.2874 | 0.2728  |
| CEU | NPIP | 30182897 | 6.173   | 5.7991 | 0.1852  |
| CEU | NPIP | 30187897 | 3.5114  | 5.1169 | -0.8887 |
| CEU | NPIP | 30192897 | 2.0614  | 5.458  | -1.7757 |
| CEU | NPIP | 30197897 | 2.4461  | 4.9463 | -1.4259 |
| CEU | NPIP | 30202897 | 1.1575  | 1.7056 | -0.7507 |

## 2\_TajimasD\_data

|     |      |          |        |        |         |
|-----|------|----------|--------|--------|---------|
| CEU | NPIP | 30207897 | 0.0499 | 0.5117 | -1.4483 |
| CEU | NPIP | 30212897 | 0.1655 | 0.8528 | -1.5478 |
| CEU | NPIP | 30217897 | 0.1156 | 0.3411 | -0.904  |
| CEU | NPIP | 30222897 | 0.4937 | 0.5117 | -0.0565 |
| CEU | NPIP | 30227897 | 0.5038 | 0.6822 | -0.4659 |
| CEU | NPIP | 30232897 | 0.0303 | 0.3411 | -1.2459 |
| CEU | NPIP | 30237897 | 0.0202 | 0.1706 | -0.8934 |
| CEU | NPIP | 30242897 | 0      | 0      | 0       |
| CEU | NPIP | 30247897 | 0      | 0      | 0       |
| CEU | NPIP | 30252897 | 0      | 0      | 0       |
| CEU | NPIP | 30257897 | 0      | 0      | 0       |
| CEU | NPIP | 30262897 | 0.0499 | 0.3411 | -1.1673 |
| CEU | NPIP | 30267897 | 0.0802 | 0.8528 | -1.7399 |
| CEU | NPIP | 30272897 | 0.0404 | 0.6822 | -1.6759 |
| CEU | NPIP | 30277897 | 0.0101 | 0.1706 | -0.9534 |
| CEU | NPIP | 30282897 | 0.6151 | 0.5117 | 0.3243  |
| CEU | NPIP | 30287897 | 1.1631 | 0.8528 | 0.6988  |
| CEU | NPIP | 30292897 | 1.563  | 1.3645 | 0.3211  |
| CEU | NPIP | 30297897 | 1.0251 | 1.3645 | -0.5491 |
| CEU | NPIP | 30302897 | 0.5187 | 0.6822 | -0.4269 |
| CEU | NPIP | 30307897 | 1.0796 | 1.0234 | 0.1117  |
| CEU | NPIP | 30312897 | 1.0705 | 1.0234 | 0.0936  |
| CEU | NPIP | 30317897 | 1.5401 | 1.7056 | -0.2267 |
| CEU | NPIP | 30322897 | 3.9025 | 3.4112 | 0.3859  |
| CEU | NPIP | 30327897 | 6.5723 | 4.7757 | 1.0567  |
| CEU | NPIP | 30332897 | 7.122  | 6.4814 | 0.2871  |
| CEU | NPIP | 30337897 | 6.0561 | 6.3108 | -0.1169 |
| CEU | NPIP | 30342897 | 5.9314 | 6.1402 | -0.0983 |
| CEU | NPIP | 30347897 | 5.6988 | 6.9931 | -0.5416 |
| CEU | NPIP | 30352897 | 3.8633 | 5.9697 | -1.0166 |
| CEU | NPIP | 30357897 | 4.4385 | 5.458  | -0.533  |
| CEU | NPIP | 30362897 | 4.5203 | 5.9697 | -0.6995 |
| CEU | NPIP | 30367897 | 2.4444 | 4.4346 | -1.2487 |
| CEU | NPIP | 30372897 | 3.5529 | 4.6052 | -0.6389 |
| CEU | NPIP | 30377897 | 4.3474 | 6.4814 | -0.9565 |
| CEU | NPIP | 30382897 | 3.1472 | 6.1402 | -1.4084 |
| CEU | NPIP | 30387897 | 3.9013 | 5.1169 | -0.6729 |
| CEU | NPIP | 30392897 | 5.5545 | 5.9697 | -0.2004 |
| CEU | NPIP | 30397897 | 5.1973 | 7.3342 | -0.8562 |
| CEU | NPIP | 30402897 | 4.5143 | 6.9931 | -1.0372 |
| CEU | NPIP | 30407897 | 4.3781 | 5.6286 | -0.6361 |
| CEU | NPIP | 30412897 | 3.5121 | 3.5818 | -0.0525 |
| CEU | NPIP | 30417897 | 2.9031 | 2.5584 | 0.3434  |
| CEU | NPIP | 30422897 | 2.8409 | 2.5584 | 0.2814  |
| CEU | NPIP | 30427897 | 3.6755 | 3.0701 | 0.5193  |
| CEU | NPIP | 30432897 | 4.556  | 4.6052 | -0.0299 |
| CEU | NPIP | 30437897 | 3.9004 | 4.7757 | -0.5148 |
| CEU | NPIP | 30442897 | 3.7846 | 4.6052 | -0.4982 |
| CEU | NPIP | 30447897 | 4.5951 | 5.9697 | -0.6634 |

## 2\_TajimasD\_data

|     |      |          |         |        |         |
|-----|------|----------|---------|--------|---------|
| CEU | NPIP | 30452897 | 3.5253  | 5.6286 | -1.0699 |
| CEU | NPIP | 30457897 | 4.6809  | 6.3108 | -0.7483 |
| CEU | NPIP | 30462897 | 5.7695  | 5.9697 | -0.0966 |
| CEU | NPIP | 30467897 | 6.4787  | 6.1402 | 0.1593  |
| CEU | NPIP | 30472897 | 6.4395  | 7.5047 | -0.4179 |
| CEU | NPIP | 30477897 | 5.1342  | 6.6519 | -0.6645 |
| CEU | NPIP | 30482897 | 4.4842  | 5.1169 | -0.3502 |
| CEU | NPIP | 30487897 | 4.8275  | 4.6052 | 0.135   |
| CEU | NPIP | 30492897 | 7.0959  | 5.2874 | 0.9724  |
| CEU | NPIP | 30497897 | 7.697   | 5.6286 | 1.0521  |
| CEU | NPIP | 30502897 | 7.4463  | 6.6519 | 0.3478  |
| CEU | NPIP | 30507897 | 8.2977  | 6.8225 | 0.6312  |
| CEU | NPIP | 30512897 | 11.859  | 8.3576 | 1.2446  |
| CEU | NPIP | 30517897 | 10.2007 | 8.5281 | 0.5836  |
| CEU | NPIP | 30522897 | 4.2126  | 4.9463 | -0.4184 |
| CEU | NPIP | 30527897 | 2.7324  | 4.6052 | -1.1371 |
| CEU | NPIP | 30532897 | 3.1635  | 5.2874 | -1.142  |
| CEU | NPIP | 30537897 | 2.9326  | 3.2407 | -0.2526 |
| CEU | NPIP | 30542897 | 2.2358  | 3.2407 | -0.824  |
| CEU | NPIP | 30547897 | 3.4952  | 4.9463 | -0.8276 |
| CEU | NPIP | 30552897 | 4.9254  | 6.8225 | -0.8118 |
| CEU | NPIP | 30557897 | 4.0078  | 6.6519 | -1.1576 |
| CEU | NPIP | 30562897 | 2.1338  | 5.6286 | -1.7777 |
| CEU | NPIP | 30567897 | 1.6891  | 6.6519 | -2.1728 |
| CEU | NPIP | 30572897 | 1.798   | 5.458  | -1.9134 |
| CEU | NPIP | 30577897 | 1.4939  | 3.5818 | -1.5736 |
| CEU | NPIP | 30582897 | 2.0144  | 3.5818 | -1.1813 |
| CEU | NPIP | 30587897 | 3.0219  | 4.0935 | -0.7206 |
| CEU | NPIP | 30592897 | 2.616   | 4.6052 | -1.2077 |
| CEU | NPIP | 30597897 | 1.2773  | 4.0935 | -1.8937 |
| CEU | NPIP | 30602897 | 1.8159  | 3.4112 | -1.253  |
| CEU | NPIP | 30607897 | 2.0913  | 3.5818 | -1.1234 |
| CEU | NPIP | 30612897 | 2.4234  | 3.5818 | -0.8731 |
| CEU | NPIP | 30617897 | 1.9623  | 3.0701 | -0.9503 |
| CEU | NPIP | 30622897 | 1.9027  | 3.0701 | -1.0014 |
| CEU | NPIP | 30627897 | 2.3682  | 3.5818 | -0.9147 |
| CEU | NPIP | 30632897 | 4.6343  | 4.0935 | 0.3636  |
| CEU | NPIP | 30637897 | 6.1929  | 4.9463 | 0.7109  |
| CEU | NPIP | 30642897 | 8.9202  | 6.6519 | 0.9931  |
| CEU | NPIP | 30647897 | 10.5813 | 7.5047 | 1.2071  |
| CEU | NPIP | 30652897 | 5.6867  | 4.6052 | 0.6566  |
| CEU | NPIP | 30657897 | 2.3331  | 2.2173 | 0.1294  |
| CEU | NPIP | 30662897 | 1.6976  | 2.729  | -0.9749 |
| CEU | NPIP | 30667897 | 2.1855  | 2.8996 | -0.6422 |
| CEU | NPIP | 30672897 | 1.3896  | 3.0701 | -1.4415 |
| CEU | NPIP | 30677897 | 0.804   | 4.2641 | -2.2461 |
| CEU | NPIP | 30682897 | 1.1897  | 4.0935 | -1.9526 |
| CEU | NPIP | 30687897 | 2.0674  | 4.6052 | -1.5408 |
| CEU | NPIP | 30692897 | 3.0161  | 5.458  | -1.2766 |

## 2\_TajimasD\_data

|     |      |          |        |         |         |
|-----|------|----------|--------|---------|---------|
| CEU | NPIP | 30697897 | 2.2008 | 3.9229  | -1.2011 |
| CEU | NPIP | 30702897 | 2.5611 | 3.2407  | -0.5573 |
| CEU | NPIP | 30707897 | 2.1064 | 4.2641  | -1.4007 |
| CEU | NPIP | 30712897 | 2.0897 | 4.6052  | -1.5273 |
| CEU | NPIP | 30717897 | 2.5296 | 4.0935  | -1.0516 |
| CEU | NPIP | 30722897 | 2.1381 | 5.1169  | -1.6488 |
| CEU | NPIP | 30727897 | 2.3142 | 5.6286  | -1.6859 |
| CEU | NPIP | 30732897 | 1.0555 | 3.9229  | -1.9999 |
| CEU | NPIP | 30737897 | 1.0567 | 3.4112  | -1.8493 |
| CEU | NPIP | 30742897 | 2.4943 | 4.0935  | -1.0753 |
| CHB | NPIP | 29727897 | 2.8978 | 7.7931  | -1.8502 |
| CHB | NPIP | 29732897 | 2.5757 | 9.8261  | -2.2121 |
| CHB | NPIP | 29737897 | 2.9922 | 8.979   | -1.986  |
| CHB | NPIP | 29742897 | 2.9183 | 6.4378  | -1.5825 |
| CHB | NPIP | 29747897 | 5.9539 | 10.5037 | -1.3044 |
| CHB | NPIP | 29752897 | 5.5024 | 10.8426 | -1.4862 |
| CHB | NPIP | 29757897 | 2.4234 | 7.9625  | -2.0526 |
| CHB | NPIP | 29762897 | 4.806  | 10.3343 | -1.6092 |
| CHB | NPIP | 29767897 | 4.5374 | 10.3343 | -1.6874 |
| CHB | NPIP | 29772897 | 2.5315 | 10.5037 | -2.2856 |
| CHB | NPIP | 29777897 | 2.2644 | 10.3343 | -2.349  |
| CHB | NPIP | 29782897 | 2.0792 | 5.9295  | -1.864  |
| CHB | NPIP | 29787897 | 3.6156 | 7.4543  | -1.511  |
| CHB | NPIP | 29792897 | 3.558  | 9.4872  | -1.869  |
| CHB | NPIP | 29797897 | 1.8597 | 7.6237  | -2.2228 |
| CHB | NPIP | 29802897 | 1.1159 | 6.4378  | -2.3929 |
| CHB | NPIP | 29807897 | 0.9122 | 4.2354  | -2.1634 |
| CHB | NPIP | 29812897 | 1.0445 | 4.7436  | -2.182  |
| CHB | NPIP | 29817897 | 1.2545 | 6.7766  | -2.3704 |
| CHB | NPIP | 29822897 | 1.5635 | 6.946   | -2.2594 |
| CHB | NPIP | 29827897 | 2.3322 | 7.2848  | -1.9908 |
| CHB | NPIP | 29832897 | 3.0423 | 6.6072  | -1.5657 |
| CHB | NPIP | 29837897 | 3.1942 | 6.4378  | -1.4584 |
| CHB | NPIP | 29842897 | 2.268  | 6.2684  | -1.8424 |
| CHB | NPIP | 29847897 | 1.7148 | 5.2519  | -1.9077 |
| CHB | NPIP | 29852897 | 1.4582 | 5.9295  | -2.1646 |
| CHB | NPIP | 29857897 | 1.7952 | 6.946   | -2.1621 |
| CHB | NPIP | 29862897 | 2.687  | 7.6237  | -1.9037 |
| CHB | NPIP | 29867897 | 2.1047 | 6.2684  | -1.9177 |
| CHB | NPIP | 29872897 | 1.9429 | 6.0989  | -1.9618 |
| CHB | NPIP | 29877897 | 2.7341 | 6.7766  | -1.7353 |
| CHB | NPIP | 29882897 | 4.3257 | 5.9295  | -0.7764 |
| CHB | NPIP | 29887897 | 4.2983 | 5.2519  | -0.5143 |
| CHB | NPIP | 29892897 | 5.3962 | 5.4213  | -0.0132 |
| CHB | NPIP | 29897897 | 7.8932 | 5.9295  | 0.9507  |
| CHB | NPIP | 29902897 | 7.3587 | 5.9295  | 0.6919  |
| CHB | NPIP | 29907897 | 8.0162 | 6.6072  | 0.6188  |
| CHB | NPIP | 29912897 | 7.1553 | 6.0989  | 0.4987  |
| CHB | NPIP | 29917897 | 5.3476 | 5.7601  | -0.2049 |

## 2\_TajimasD\_data

|     |      |          |        |        |         |
|-----|------|----------|--------|--------|---------|
| CHB | NPIP | 29922897 | 5.9558 | 6.7766 | -0.3523 |
| CHB | NPIP | 29927897 | 6.4498 | 6.7766 | -0.1403 |
| CHB | NPIP | 29932897 | 7.7044 | 7.9625 | -0.0956 |
| CHB | NPIP | 29937897 | 6.7487 | 6.7766 | -0.012  |
| CHB | NPIP | 29942897 | 5.8843 | 5.2519 | 0.3411  |
| CHB | NPIP | 29947897 | 5.288  | 6.0989 | -0.3828 |
| CHB | NPIP | 29952897 | 2.9143 | 5.9295 | -1.4597 |
| CHB | NPIP | 29957897 | 3.9006 | 6.6072 | -1.1888 |
| CHB | NPIP | 29962897 | 5.1532 | 5.7601 | -0.3015 |
| CHB | NPIP | 29967897 | 6.331  | 5.2519 | 0.582   |
| CHB | NPIP | 29972897 | 5.553  | 4.913  | 0.3661  |
| CHB | NPIP | 29977897 | 6.186  | 4.913  | 0.7282  |
| CHB | NPIP | 29982897 | 8.134  | 5.5907 | 1.2976  |
| CHB | NPIP | 29987897 | 4.6351 | 4.4048 | 0.1449  |
| CHB | NPIP | 29992897 | 4.7245 | 5.5907 | -0.442  |
| CHB | NPIP | 29997897 | 5.2324 | 6.0989 | -0.409  |
| CHB | NPIP | 30002897 | 2.8214 | 4.913  | -1.1964 |
| CHB | NPIP | 30007897 | 3.2121 | 5.4213 | -1.1584 |
| CHB | NPIP | 30012897 | 6.1015 | 7.9625 | -0.6896 |
| CHB | NPIP | 30017897 | 6.9086 | 8.8096 | -0.6418 |
| CHB | NPIP | 30022897 | 6.3337 | 6.4378 | -0.0468 |
| CHB | NPIP | 30027897 | 6.3082 | 4.913  | 0.7981  |
| CHB | NPIP | 30032897 | 6.1108 | 5.4213 | 0.3616  |
| CHB | NPIP | 30037897 | 7.321  | 7.1154 | 0.0844  |
| CHB | NPIP | 30042897 | 7.5901 | 6.4378 | 0.5181  |
| CHB | NPIP | 30047897 | 8.1536 | 6.7766 | 0.5911  |
| CHB | NPIP | 30052897 | 6.6482 | 8.1319 | -0.5393 |
| CHB | NPIP | 30057897 | 4.1614 | 6.4378 | -1.0235 |
| CHB | NPIP | 30062897 | 4.7149 | 6.4378 | -0.7747 |
| CHB | NPIP | 30067897 | 4.73   | 7.4543 | -1.0724 |
| CHB | NPIP | 30072897 | 2.9309 | 6.0989 | -1.4954 |
| CHB | NPIP | 30077897 | 3.0095 | 7.4543 | -1.7496 |
| CHB | NPIP | 30082897 | 2.7927 | 7.4543 | -1.8349 |
| CHB | NPIP | 30087897 | 2.5243 | 5.5907 | -1.5645 |
| CHB | NPIP | 30092897 | 5.1536 | 8.1319 | -1.0825 |
| CHB | NPIP | 30097897 | 5.0177 | 7.2848 | -0.9113 |
| CHB | NPIP | 30102897 | 3.744  | 4.2354 | -0.3199 |
| CHB | NPIP | 30107897 | 3.1296 | 5.4213 | -1.2017 |
| CHB | NPIP | 30112897 | 2.0714 | 5.7601 | -1.8326 |
| CHB | NPIP | 30117897 | 5.2968 | 7.9625 | -0.9878 |
| CHB | NPIP | 30122897 | 5.7278 | 8.4708 | -0.9602 |
| CHB | NPIP | 30127897 | 2.7849 | 5.0825 | -1.2756 |
| CHB | NPIP | 30132897 | 3.7552 | 4.5742 | -0.4987 |
| CHB | NPIP | 30137897 | 6.8468 | 6.2684 | 0.2664  |
| CHB | NPIP | 30142897 | 6.1685 | 6.946  | -0.3264 |
| CHB | NPIP | 30147897 | 2.5604 | 5.0825 | -1.4002 |
| CHB | NPIP | 30152897 | 3.6164 | 6.0989 | -1.1718 |
| CHB | NPIP | 30157897 | 5.4712 | 7.4543 | -0.7806 |
| CHB | NPIP | 30162897 | 8.478  | 7.4543 | 0.403   |

## 2\_TajimasD\_data

|     |      |          |        |        |         |
|-----|------|----------|--------|--------|---------|
| CHB | NPIP | 30167897 | 8.1498 | 6.946  | 0.5053  |
| CHB | NPIP | 30172897 | 4.4786 | 6.2684 | -0.8243 |
| CHB | NPIP | 30177897 | 4.8951 | 7.1154 | -0.9118 |
| CHB | NPIP | 30182897 | 5.0044 | 7.1154 | -0.8669 |
| CHB | NPIP | 30187897 | 3.0038 | 6.946  | -1.6548 |
| CHB | NPIP | 30192897 | 1.218  | 5.5907 | -2.231  |
| CHB | NPIP | 30197897 | 1.2254 | 3.7271 | -1.8174 |
| CHB | NPIP | 30202897 | 0.8251 | 1.6942 | -1.1927 |
| CHB | NPIP | 30207897 | 0      | 0      | 0       |
| CHB | NPIP | 30212897 | 0.0386 | 0.3388 | -1.2042 |
| CHB | NPIP | 30217897 | 0.0484 | 0.5082 | -1.4434 |
| CHB | NPIP | 30222897 | 0.1542 | 0.3388 | -0.7405 |
| CHB | NPIP | 30227897 | 0.1445 | 0.1694 | -0.148  |
| CHB | NPIP | 30232897 | 0.0192 | 0.1694 | -0.8925 |
| CHB | NPIP | 30237897 | 0.0192 | 0.1694 | -0.8925 |
| CHB | NPIP | 30242897 | 0      | 0      | 0       |
| CHB | NPIP | 30247897 | 0      | 0      | 0       |
| CHB | NPIP | 30252897 | 0      | 0      | 0       |
| CHB | NPIP | 30257897 | 0      | 0      | 0       |
| CHB | NPIP | 30262897 | 0.1277 | 0.1694 | -0.2478 |
| CHB | NPIP | 30267897 | 0.1472 | 0.5082 | -1.1332 |
| CHB | NPIP | 30272897 | 0.0194 | 0.3388 | -1.2812 |
| CHB | NPIP | 30277897 | 0      | 0      | 0       |
| CHB | NPIP | 30282897 | 0.5635 | 0.6777 | -0.2986 |
| CHB | NPIP | 30287897 | 0.8327 | 1.3553 | -0.847  |
| CHB | NPIP | 30292897 | 0.7049 | 2.2024 | -1.6768 |
| CHB | NPIP | 30297897 | 0.4455 | 1.8636 | -1.8093 |
| CHB | NPIP | 30302897 | 0.1776 | 1.1859 | -1.7998 |
| CHB | NPIP | 30307897 | 0.3954 | 2.5412 | -2.1427 |
| CHB | NPIP | 30312897 | 0.412  | 2.2024 | -2.0048 |
| CHB | NPIP | 30317897 | 0.4287 | 1.5247 | -1.6283 |
| CHB | NPIP | 30322897 | 1.6276 | 5.2519 | -1.9547 |
| CHB | NPIP | 30327897 | 2.9103 | 7.6237 | -1.8176 |
| CHB | NPIP | 30332897 | 2.6257 | 6.7766 | -1.7818 |
| CHB | NPIP | 30337897 | 2.0346 | 6.946  | -2.0616 |
| CHB | NPIP | 30342897 | 2.3362 | 6.0989 | -1.7762 |
| CHB | NPIP | 30347897 | 2.107  | 5.9295 | -1.8505 |
| CHB | NPIP | 30352897 | 2.0278 | 5.2519 | -1.7389 |
| CHB | NPIP | 30357897 | 2.4826 | 5.0825 | -1.4434 |
| CHB | NPIP | 30362897 | 1.6722 | 6.946  | -2.2137 |
| CHB | NPIP | 30367897 | 0.739  | 5.9295 | -2.5128 |
| CHB | NPIP | 30372897 | 1.1123 | 5.4213 | -2.2595 |
| CHB | NPIP | 30377897 | 1.7704 | 6.2684 | -2.0716 |
| CHB | NPIP | 30382897 | 1.4734 | 5.2519 | -2.0379 |
| CHB | NPIP | 30387897 | 1.5252 | 5.4213 | -2.043  |
| CHB | NPIP | 30392897 | 1.8525 | 6.7766 | -2.1137 |
| CHB | NPIP | 30397897 | 1.7729 | 6.946  | -2.1715 |
| CHB | NPIP | 30402897 | 1.4795 | 5.5907 | -2.0976 |
| CHB | NPIP | 30407897 | 1.3122 | 4.066  | -1.857  |

## 2\_TajimasD\_data

|     |      |          |        |        |         |
|-----|------|----------|--------|--------|---------|
| CHB | NPIP | 30412897 | 1.2675 | 3.3883 | -1.6702 |
| CHB | NPIP | 30417897 | 1.0729 | 4.066  | -2.0183 |
| CHB | NPIP | 30422897 | 1.395  | 4.7436 | -1.9753 |
| CHB | NPIP | 30427897 | 1.8624 | 4.5742 | -1.6513 |
| CHB | NPIP | 30432897 | 2.506  | 4.913  | -1.3768 |
| CHB | NPIP | 30437897 | 2.4727 | 5.5907 | -1.5909 |
| CHB | NPIP | 30442897 | 1.6749 | 7.2848 | -2.255  |
| CHB | NPIP | 30447897 | 2.2596 | 8.979  | -2.229  |
| CHB | NPIP | 30452897 | 2.4265 | 7.9625 | -2.0515 |
| CHB | NPIP | 30457897 | 2.3137 | 6.7766 | -1.9158 |
| CHB | NPIP | 30462897 | 2.6204 | 6.946  | -1.8157 |
| CHB | NPIP | 30467897 | 2.2846 | 7.4543 | -2.0349 |
| CHB | NPIP | 30472897 | 1.3552 | 6.2684 | -2.2628 |
| CHB | NPIP | 30477897 | 1.2168 | 4.066  | -1.9213 |
| CHB | NPIP | 30482897 | 1.3301 | 4.066  | -1.8449 |
| CHB | NPIP | 30487897 | 2.8028 | 6.4378 | -1.6344 |
| CHB | NPIP | 30492897 | 4.1907 | 9.3178 | -1.6434 |
| CHB | NPIP | 30497897 | 4.657  | 8.8096 | -1.402  |
| CHB | NPIP | 30502897 | 4.6292 | 7.4543 | -1.112  |
| CHB | NPIP | 30507897 | 4.7312 | 6.6072 | -0.824  |
| CHB | NPIP | 30512897 | 7.2381 | 8.4708 | -0.4315 |
| CHB | NPIP | 30517897 | 5.3001 | 8.4708 | -1.11   |
| CHB | NPIP | 30522897 | 2.1032 | 4.7436 | -1.5575 |
| CHB | NPIP | 30527897 | 1.5399 | 4.066  | -1.7034 |
| CHB | NPIP | 30532897 | 0.8532 | 4.4048 | -2.2348 |
| CHB | NPIP | 30537897 | 0.7874 | 4.066  | -2.2109 |
| CHB | NPIP | 30542897 | 0.5378 | 3.7271 | -2.317  |
| CHB | NPIP | 30547897 | 0.8627 | 5.4213 | -2.3904 |
| CHB | NPIP | 30552897 | 1.7537 | 6.0989 | -2.0511 |
| CHB | NPIP | 30557897 | 1.4194 | 5.7601 | -2.1566 |
| CHB | NPIP | 30562897 | 0.7472 | 5.7601 | -2.4905 |
| CHB | NPIP | 30567897 | 0.8348 | 5.7601 | -2.447  |
| CHB | NPIP | 30572897 | 0.6063 | 4.5742 | -2.4161 |
| CHB | NPIP | 30577897 | 0.861  | 5.2519 | -2.3682 |
| CHB | NPIP | 30582897 | 1.2104 | 6.2684 | -2.3295 |
| CHB | NPIP | 30587897 | 1.47   | 5.5907 | -2.1025 |
| CHB | NPIP | 30592897 | 1.1401 | 5.2519 | -2.2176 |
| CHB | NPIP | 30597897 | 0.5673 | 3.8965 | -2.3285 |
| CHB | NPIP | 30602897 | 0.7773 | 4.4048 | -2.2826 |
| CHB | NPIP | 30607897 | 0.7188 | 4.066  | -2.2571 |
| CHB | NPIP | 30612897 | 1.4436 | 5.5907 | -2.1159 |
| CHB | NPIP | 30617897 | 1.3459 | 5.7601 | -2.1931 |
| CHB | NPIP | 30622897 | 0.9065 | 5.2519 | -2.3436 |
| CHB | NPIP | 30627897 | 1.3588 | 6.2684 | -2.2612 |
| CHB | NPIP | 30632897 | 2.4283 | 6.6072 | -1.8354 |
| CHB | NPIP | 30637897 | 3.012  | 6.6072 | -1.5791 |
| CHB | NPIP | 30642897 | 3.7733 | 5.9295 | -1.0438 |
| CHB | NPIP | 30647897 | 5.0596 | 6.6072 | -0.6797 |
| CHB | NPIP | 30652897 | 3.1034 | 5.0825 | -1.0988 |

## 2\_TajimasD\_data

|     |      |          |         |         |         |
|-----|------|----------|---------|---------|---------|
| CHB | NPIP | 30657897 | 0.8782  | 4.2354  | -2.1855 |
| CHB | NPIP | 30662897 | 1.181   | 5.2519  | -2.1956 |
| CHB | NPIP | 30667897 | 1.4963  | 6.0989  | -2.1726 |
| CHB | NPIP | 30672897 | 0.8713  | 5.7601  | -2.4289 |
| CHB | NPIP | 30677897 | 0.7727  | 4.2354  | -2.2542 |
| CHB | NPIP | 30682897 | 0.7533  | 3.8965  | -2.1984 |
| CHB | NPIP | 30687897 | 1.0583  | 5.0825  | -2.2342 |
| CHB | NPIP | 30692897 | 1.9779  | 6.0989  | -1.9453 |
| CHB | NPIP | 30697897 | 1.6499  | 6.6072  | -2.1773 |
| CHB | NPIP | 30702897 | 1.3663  | 5.7601  | -2.1829 |
| CHB | NPIP | 30707897 | 1.2465  | 5.0825  | -2.1297 |
| CHB | NPIP | 30712897 | 1.4346  | 6.0989  | -2.2018 |
| CHB | NPIP | 30717897 | 1.1136  | 4.7436  | -2.1412 |
| CHB | NPIP | 30722897 | 1.2018  | 4.913   | -2.1228 |
| CHB | NPIP | 30727897 | 1.6889  | 5.9295  | -2.0529 |
| CHB | NPIP | 30732897 | 1.0335  | 5.2519  | -2.2751 |
| CHB | NPIP | 30737897 | 0.7674  | 5.7601  | -2.4805 |
| CHB | NPIP | 30742897 | 0.9556  | 5.5907  | -2.3649 |
| YRI | NPIP | 29727897 | 7.8907  | 12.1005 | -1.0532 |
| YRI | NPIP | 29732897 | 9.6737  | 14.1172 | -0.9608 |
| YRI | NPIP | 29737897 | 8.3473  | 11.4282 | -0.8134 |
| YRI | NPIP | 29742897 | 7.5939  | 8.7392  | -0.3882 |
| YRI | NPIP | 29747897 | 17.2857 | 14.1172 | 0.6851  |
| YRI | NPIP | 29752897 | 19.4985 | 15.9659 | 0.6794  |
| YRI | NPIP | 29757897 | 13.089  | 13.1089 | -0.0046 |
| YRI | NPIP | 29762897 | 15.2446 | 13.9492 | 0.2833  |
| YRI | NPIP | 29767897 | 14.3692 | 15.4617 | -0.2166 |
| YRI | NPIP | 29772897 | 15.5751 | 16.4701 | -0.1671 |
| YRI | NPIP | 29777897 | 15.6639 | 15.2937 | 0.0742  |
| YRI | NPIP | 29782897 | 9.2042  | 11.9324 | -0.6916 |
| YRI | NPIP | 29787897 | 13.4678 | 11.5963 | 0.4873  |
| YRI | NPIP | 29792897 | 13.4475 | 10.5879 | 0.811   |
| YRI | NPIP | 29797897 | 6.3555  | 7.8989  | -0.5742 |
| YRI | NPIP | 29802897 | 3.9357  | 7.8989  | -1.4744 |
| YRI | NPIP | 29807897 | 3.4297  | 8.4031  | -1.748  |
| YRI | NPIP | 29812897 | 3.7304  | 9.5795  | -1.821  |
| YRI | NPIP | 29817897 | 4.4151  | 11.7644 | -1.8881 |
| YRI | NPIP | 29822897 | 5.1187  | 12.1005 | -1.7467 |
| YRI | NPIP | 29827897 | 6.4279  | 10.756  | -1.2095 |
| YRI | NPIP | 29832897 | 8.6172  | 12.7727 | -0.9879 |
| YRI | NPIP | 29837897 | 8.8255  | 12.9408 | -0.9663 |
| YRI | NPIP | 29842897 | 5.5608  | 7.5628  | -0.775  |
| YRI | NPIP | 29847897 | 4.3567  | 6.2183  | -0.8606 |
| YRI | NPIP | 29852897 | 4.3194  | 8.4031  | -1.4353 |
| YRI | NPIP | 29857897 | 5.3703  | 10.0837 | -1.399  |
| YRI | NPIP | 29862897 | 7.7352  | 12.1005 | -1.0921 |
| YRI | NPIP | 29867897 | 6.2497  | 10.2518 | -1.1697 |
| YRI | NPIP | 29872897 | 5.0374  | 10.4199 | -1.5495 |
| YRI | NPIP | 29877897 | 6.8374  | 12.2685 | -1.3412 |



## 2\_TajimasD\_data

|     |      |          |         |         |         |
|-----|------|----------|---------|---------|---------|
| YRI | NPIP | 29882897 | 7.7757  | 9.9157  | -0.6452 |
| YRI | NPIP | 29887897 | 6.1782  | 9.2434  | -0.9865 |
| YRI | NPIP | 29892897 | 7.5456  | 9.9157  | -0.7146 |
| YRI | NPIP | 29897897 | 8.4594  | 9.7476  | -0.3946 |
| YRI | NPIP | 29902897 | 7.6085  | 9.5795  | -0.6136 |
| YRI | NPIP | 29907897 | 9.7092  | 10.4199 | -0.2046 |
| YRI | NPIP | 29912897 | 7.4686  | 8.4031  | -0.3284 |
| YRI | NPIP | 29917897 | 5.3455  | 7.2267  | -0.7591 |
| YRI | NPIP | 29922897 | 6.8697  | 8.5712  | -0.5872 |
| YRI | NPIP | 29927897 | 8.0026  | 9.4115  | -0.4459 |
| YRI | NPIP | 29932897 | 9.5601  | 11.0921 | -0.4159 |
| YRI | NPIP | 29937897 | 8.5884  | 8.7392  | -0.0511 |
| YRI | NPIP | 29942897 | 8.506   | 7.3947  | 0.4391  |
| YRI | NPIP | 29947897 | 7.9013  | 8.9073  | -0.3351 |
| YRI | NPIP | 29952897 | 5.4524  | 7.7309  | -0.8645 |
| YRI | NPIP | 29957897 | 5.9645  | 8.235   | -0.813  |
| YRI | NPIP | 29962897 | 5.782   | 8.235   | -0.8783 |
| YRI | NPIP | 29967897 | 7.2169  | 8.7392  | -0.516  |
| YRI | NPIP | 29972897 | 7.2754  | 9.0754  | -0.5892 |
| YRI | NPIP | 29977897 | 6.1289  | 7.8989  | -0.6585 |
| YRI | NPIP | 29982897 | 7.7577  | 9.2434  | -0.4781 |
| YRI | NPIP | 29987897 | 5.6788  | 7.8989  | -0.8259 |
| YRI | NPIP | 29992897 | 5.3935  | 7.2267  | -0.7397 |
| YRI | NPIP | 29997897 | 5.7915  | 7.8989  | -0.784  |
| YRI | NPIP | 30002897 | 4.1623  | 7.3947  | -1.2773 |
| YRI | NPIP | 30007897 | 6.5087  | 8.5712  | -0.7118 |
| YRI | NPIP | 30012897 | 10.7363 | 10.756  | -0.0055 |
| YRI | NPIP | 30017897 | 9.2354  | 9.2434  | -0.0026 |
| YRI | NPIP | 30022897 | 6.1231  | 6.8906  | -0.3234 |
| YRI | NPIP | 30027897 | 6.4209  | 8.235   | -0.6495 |
| YRI | NPIP | 30032897 | 7.2058  | 9.5795  | -0.739  |
| YRI | NPIP | 30037897 | 7.9888  | 9.2434  | -0.4038 |
| YRI | NPIP | 30042897 | 8.1101  | 8.9073  | -0.2655 |
| YRI | NPIP | 30047897 | 9.5965  | 10.0837 | -0.1446 |
| YRI | NPIP | 30052897 | 9.8808  | 11.9324 | -0.5201 |
| YRI | NPIP | 30057897 | 8.4659  | 12.9408 | -1.0508 |
| YRI | NPIP | 30062897 | 7.6134  | 12.4366 | -1.1759 |
| YRI | NPIP | 30067897 | 6.068   | 10.2518 | -1.2228 |
| YRI | NPIP | 30072897 | 3.1724  | 8.4031  | -1.8384 |
| YRI | NPIP | 30077897 | 3.9363  | 10.0837 | -1.8246 |
| YRI | NPIP | 30082897 | 5.2799  | 9.9157  | -1.3977 |
| YRI | NPIP | 30087897 | 5.3808  | 9.5795  | -1.3072 |
| YRI | NPIP | 30092897 | 7.2394  | 11.5963 | -1.1346 |
| YRI | NPIP | 30097897 | 5.5376  | 9.9157  | -1.32   |
| YRI | NPIP | 30102897 | 3.4406  | 7.0586  | -1.4915 |
| YRI | NPIP | 30107897 | 3.4719  | 8.235   | -1.7055 |
| YRI | NPIP | 30112897 | 3.9093  | 8.9073  | -1.6646 |
| YRI | NPIP | 30117897 | 7.9843  | 10.0837 | -0.6231 |
| YRI | NPIP | 30122897 | 8.4192  | 10.2518 | -0.5356 |

## 2\_TajimasD\_data

|     |      |          |         |        |         |
|-----|------|----------|---------|--------|---------|
| YRI | NPIP | 30127897 | 5.1009  | 9.2434 | -1.3332 |
| YRI | NPIP | 30132897 | 4.6229  | 8.235  | -1.2933 |
| YRI | NPIP | 30137897 | 7.6366  | 9.7476 | -0.6467 |
| YRI | NPIP | 30142897 | 7.6856  | 9.5795 | -0.5896 |
| YRI | NPIP | 30147897 | 2.9103  | 4.7057 | -1.0628 |
| YRI | NPIP | 30152897 | 5.1925  | 6.8906 | -0.7155 |
| YRI | NPIP | 30157897 | 8.7219  | 8.5712 | 0.052   |
| YRI | NPIP | 30162897 | 12.4587 | 8.7392 | 1.2608  |
| YRI | NPIP | 30167897 | 12.8405 | 9.0754 | 1.2325  |
| YRI | NPIP | 30172897 | 8.1155  | 6.7225 | 0.6002  |
| YRI | NPIP | 30177897 | 8.4006  | 6.7225 | 0.7231  |
| YRI | NPIP | 30182897 | 9.116   | 7.5628 | 0.6013  |
| YRI | NPIP | 30187897 | 6.6339  | 6.3864 | 0.1117  |
| YRI | NPIP | 30192897 | 3.5185  | 6.5544 | -1.3385 |
| YRI | NPIP | 30197897 | 2.5482  | 5.8822 | -1.62   |
| YRI | NPIP | 30202897 | 1.4488  | 2.0167 | -0.679  |
| YRI | NPIP | 30207897 | 0.1515  | 0.5042 | -1.1084 |
| YRI | NPIP | 30212897 | 0.2158  | 1.1764 | -1.7181 |
| YRI | NPIP | 30217897 | 0.0643  | 0.6722 | -1.5914 |
| YRI | NPIP | 30222897 | 0.5038  | 0.1681 | 1.9956  |
| YRI | NPIP | 30227897 | 0.5038  | 0.1681 | 1.9956  |
| YRI | NPIP | 30232897 | 0.0369  | 0.5042 | -1.4686 |
| YRI | NPIP | 30237897 | 0.0369  | 0.5042 | -1.4686 |
| YRI | NPIP | 30242897 | 0.0093  | 0.1681 | -0.944  |
| YRI | NPIP | 30247897 | 0.0093  | 0.1681 | -0.944  |
| YRI | NPIP | 30252897 | 0       | 0      | 0       |
| YRI | NPIP | 30257897 | 0       | 0      | 0       |
| YRI | NPIP | 30262897 | 0.1966  | 0.8403 | -1.4539 |
| YRI | NPIP | 30267897 | 0.2059  | 1.0084 | -1.5999 |
| YRI | NPIP | 30272897 | 0.0093  | 0.1681 | -0.944  |
| YRI | NPIP | 30277897 | 0.0891  | 0.1681 | -0.4696 |
| YRI | NPIP | 30282897 | 1.1364  | 1.1764 | -0.0715 |
| YRI | NPIP | 30287897 | 2.3186  | 2.3529 | -0.0363 |
| YRI | NPIP | 30292897 | 4.2576  | 3.1932 | 0.8778  |
| YRI | NPIP | 30297897 | 3.5639  | 3.1932 | 0.3057  |
| YRI | NPIP | 30302897 | 1.1959  | 2.3529 | -1.2247 |
| YRI | NPIP | 30307897 | 1.4368  | 3.1932 | -1.4485 |
| YRI | NPIP | 30312897 | 1.3584  | 2.689  | -1.2646 |
| YRI | NPIP | 30317897 | 1.4136  | 3.1932 | -1.4677 |
| YRI | NPIP | 30322897 | 3.4273  | 7.8989 | -1.6635 |
| YRI | NPIP | 30327897 | 6.2004  | 9.2434 | -0.9793 |
| YRI | NPIP | 30332897 | 7.4818  | 8.235  | -0.2697 |
| YRI | NPIP | 30337897 | 6.2683  | 6.8906 | -0.2622 |
| YRI | NPIP | 30342897 | 5.5157  | 6.3864 | -0.393  |
| YRI | NPIP | 30347897 | 6.265   | 9.0754 | -0.92   |
| YRI | NPIP | 30352897 | 4.1088  | 7.5628 | -1.3371 |
| YRI | NPIP | 30357897 | 3.5727  | 6.8906 | -1.3981 |
| YRI | NPIP | 30362897 | 4.4933  | 9.0754 | -1.4999 |
| YRI | NPIP | 30367897 | 3.1575  | 7.2267 | -1.642  |

## 2\_TajimasD\_data

|     |      |          |         |         |         |
|-----|------|----------|---------|---------|---------|
| YRI | NPIP | 30372897 | 3.7059  | 6.8906  | -1.3419 |
| YRI | NPIP | 30377897 | 4.7209  | 8.5712  | -1.3288 |
| YRI | NPIP | 30382897 | 4.6663  | 6.7225  | -0.886  |
| YRI | NPIP | 30387897 | 4.5275  | 5.378   | -0.4476 |
| YRI | NPIP | 30392897 | 6.178   | 6.5544  | -0.1659 |
| YRI | NPIP | 30397897 | 6.8902  | 8.235   | -0.4815 |
| YRI | NPIP | 30402897 | 5.1051  | 9.7476  | -1.4222 |
| YRI | NPIP | 30407897 | 4.8265  | 8.9073  | -1.3591 |
| YRI | NPIP | 30412897 | 5.5518  | 7.8989  | -0.8732 |
| YRI | NPIP | 30417897 | 5.0927  | 6.3864  | -0.5839 |
| YRI | NPIP | 30422897 | 4.2249  | 5.0419  | -0.4552 |
| YRI | NPIP | 30427897 | 3.585   | 6.0502  | -1.168  |
| YRI | NPIP | 30432897 | 4.3761  | 7.3947  | -1.1928 |
| YRI | NPIP | 30437897 | 4.416   | 7.2267  | -1.1342 |
| YRI | NPIP | 30442897 | 4.9058  | 8.067   | -1.1535 |
| YRI | NPIP | 30447897 | 6.26    | 10.4199 | -1.1975 |
| YRI | NPIP | 30452897 | 4.9334  | 10.0837 | -1.5287 |
| YRI | NPIP | 30457897 | 5.7299  | 9.5795  | -1.1985 |
| YRI | NPIP | 30462897 | 5.4928  | 8.235   | -0.9819 |
| YRI | NPIP | 30467897 | 6.8626  | 10.0837 | -0.9561 |
| YRI | NPIP | 30472897 | 6.8964  | 11.0921 | -1.1392 |
| YRI | NPIP | 30477897 | 4.1288  | 7.7309  | -1.3667 |
| YRI | NPIP | 30482897 | 3.946   | 7.2267  | -1.3238 |
| YRI | NPIP | 30487897 | 6.4597  | 9.2434  | -0.8959 |
| YRI | NPIP | 30492897 | 9.7429  | 11.2602 | -0.4062 |
| YRI | NPIP | 30497897 | 8.2114  | 10.924  | -0.7471 |
| YRI | NPIP | 30502897 | 7.2494  | 10.2518 | -0.8775 |
| YRI | NPIP | 30507897 | 9.1323  | 10.0837 | -0.2824 |
| YRI | NPIP | 30512897 | 12.5506 | 12.9408 | -0.0916 |
| YRI | NPIP | 30517897 | 10.8798 | 13.1089 | -0.5171 |
| YRI | NPIP | 30522897 | 5.1796  | 9.0754  | -1.2753 |
| YRI | NPIP | 30527897 | 3.6892  | 7.2267  | -1.4275 |
| YRI | NPIP | 30532897 | 4.2996  | 8.4031  | -1.4422 |
| YRI | NPIP | 30537897 | 5.0028  | 11.5963 | -1.717  |
| YRI | NPIP | 30542897 | 4.0479  | 9.0754  | -1.6457 |
| YRI | NPIP | 30547897 | 3.7779  | 9.0754  | -1.7341 |
| YRI | NPIP | 30552897 | 4.1035  | 9.5795  | -1.7049 |
| YRI | NPIP | 30557897 | 4.0824  | 9.0754  | -1.6344 |
| YRI | NPIP | 30562897 | 3.5981  | 10.0837 | -1.925  |
| YRI | NPIP | 30567897 | 4.0997  | 10.2518 | -1.7981 |
| YRI | NPIP | 30572897 | 4.1331  | 9.2434  | -1.6446 |
| YRI | NPIP | 30577897 | 2.8454  | 5.8822  | -1.4756 |
| YRI | NPIP | 30582897 | 2.8675  | 6.5544  | -1.6255 |
| YRI | NPIP | 30587897 | 5.2471  | 8.4031  | -1.1092 |
| YRI | NPIP | 30592897 | 6.5814  | 9.5795  | -0.9334 |
| YRI | NPIP | 30597897 | 4.9406  | 8.4031  | -1.2169 |
| YRI | NPIP | 30602897 | 5.74    | 6.8906  | -0.4848 |
| YRI | NPIP | 30607897 | 5.3662  | 5.7141  | -0.1735 |
| YRI | NPIP | 30612897 | 6.0514  | 7.0586  | -0.4152 |

## 2\_TajimasD\_data

|     |      |          |        |         |         |
|-----|------|----------|--------|---------|---------|
| YRI | NPIP | 30617897 | 5.8293 | 8.235   | -0.8614 |
| YRI | NPIP | 30622897 | 4.3506 | 7.5628  | -1.2435 |
| YRI | NPIP | 30627897 | 4.9232 | 9.2434  | -1.3904 |
| YRI | NPIP | 30632897 | 6.2677 | 11.0921 | -1.3099 |
| YRI | NPIP | 30637897 | 6.8328 | 9.4115  | -0.8161 |
| YRI | NPIP | 30642897 | 7.4871 | 8.4031  | -0.3219 |
| YRI | NPIP | 30647897 | 9.6902 | 10.924  | -0.3398 |
| YRI | NPIP | 30652897 | 6.8228 | 9.0754  | -0.7374 |
| YRI | NPIP | 30657897 | 3.0119 | 6.0502  | -1.4396 |
| YRI | NPIP | 30662897 | 3.3568 | 6.7225  | -1.4503 |
| YRI | NPIP | 30667897 | 4.9513 | 6.8906  | -0.8172 |
| YRI | NPIP | 30672897 | 3.9353 | 6.8906  | -1.2453 |
| YRI | NPIP | 30677897 | 2.6348 | 9.2434  | -2.1268 |
| YRI | NPIP | 30682897 | 2.9336 | 9.4115  | -2.0502 |
| YRI | NPIP | 30687897 | 4.9929 | 10.0837 | -1.511  |
| YRI | NPIP | 30692897 | 7.1529 | 10.0837 | -0.8699 |
| YRI | NPIP | 30697897 | 6.9295 | 9.4115  | -0.7855 |
| YRI | NPIP | 30702897 | 6.0468 | 10.5879 | -1.2878 |
| YRI | NPIP | 30707897 | 5.1221 | 10.756  | -1.5744 |
| YRI | NPIP | 30712897 | 6.5488 | 11.4282 | -1.2882 |
| YRI | NPIP | 30717897 | 4.6732 | 9.2434  | -1.4708 |
| YRI | NPIP | 30722897 | 4.0694 | 8.4031  | -1.5231 |
| YRI | NPIP | 30727897 | 5.7906 | 8.5712  | -0.9596 |
| YRI | NPIP | 30732897 | 3.084  | 7.3947  | -1.7034 |
| YRI | NPIP | 30737897 | 2.7543 | 7.3947  | -1.8337 |
| YRI | NPIP | 30742897 | 3.6001 | 7.7309  | -1.5673 |
| CEU | NPIP | 73879986 | 4.1416 | 5.6286  | -0.7564 |
| CEU | NPIP | 73884986 | 4.8371 | 5.6286  | -0.4026 |
| CEU | NPIP | 73889986 | 6.4032 | 6.8225  | -0.1794 |
| CEU | NPIP | 73894986 | 5.4129 | 7.1636  | -0.7166 |
| CEU | NPIP | 73899986 | 3.8703 | 5.9697  | -1.0132 |
| CEU | NPIP | 73904986 | 4.0363 | 5.7991  | -0.8731 |
| CEU | NPIP | 73909986 | 5.0893 | 6.6519  | -0.6841 |
| CEU | NPIP | 73914986 | 7.0651 | 7.3342  | -0.1078 |
| CEU | NPIP | 73919986 | 6.7258 | 8.3576  | -0.5801 |
| CEU | NPIP | 73924986 | 3.5137 | 6.1402  | -1.236  |
| CEU | NPIP | 73929986 | 3.3948 | 4.9463  | -0.8848 |
| CEU | NPIP | 73934986 | 3.0266 | 5.6286  | -1.3235 |
| CEU | NPIP | 73939986 | 1.5628 | 4.2641  | -1.7535 |
| CEU | NPIP | 73944986 | 1.9258 | 2.8996  | -0.8758 |
| CEU | NPIP | 73949986 | 3.5413 | 4.2641  | -0.4692 |
| CEU | NPIP | 73954986 | 5.2884 | 7.3342  | -0.8197 |
| CEU | NPIP | 73959986 | 4.6256 | 6.8225  | -0.94   |
| CEU | NPIP | 73964986 | 4.739  | 5.2874  | -0.2949 |
| CEU | NPIP | 73969986 | 5.214  | 5.458   | -0.1276 |
| CEU | NPIP | 73974986 | 5.569  | 5.1169  | 0.2502  |
| CEU | NPIP | 73979986 | 5.2321 | 6.4814  | -0.56   |
| CEU | NPIP | 73984986 | 4.1066 | 6.4814  | -1.0644 |
| CEU | NPIP | 73989986 | 3.3125 | 5.458   | -1.1216 |

## 2\_TajimasD\_data

|     |      |          |         |         |         |
|-----|------|----------|---------|---------|---------|
| CEU | NPIP | 73994986 | 4.0268  | 6.3108  | -1.0486 |
| CEU | NPIP | 73999986 | 3.9097  | 5.6286  | -0.8743 |
| CEU | NPIP | 74004986 | 3.8396  | 5.1169  | -0.707  |
| CEU | NPIP | 74009986 | 7.6428  | 6.1402  | 0.7071  |
| CEU | NPIP | 74014986 | 7.3049  | 5.9697  | 0.6444  |
| CEU | NPIP | 74019986 | 5.43    | 5.2874  | 0.0767  |
| CEU | NPIP | 74024986 | 5.4739  | 6.4814  | -0.4516 |
| CEU | NPIP | 74029986 | 4.865   | 6.8225  | -0.8376 |
| CEU | NPIP | 74034986 | 5.4372  | 5.6286  | -0.0974 |
| CEU | NPIP | 74039986 | 5.8472  | 5.2874  | 0.301   |
| CEU | NPIP | 74044986 | 4.9307  | 5.458   | -0.2757 |
| CEU | NPIP | 74049986 | 3.6436  | 4.9463  | -0.7429 |
| CEU | NPIP | 74054986 | 7.7209  | 6.3108  | 0.6474  |
| CEU | NPIP | 74059986 | 11.464  | 8.3576  | 1.1042  |
| CEU | NPIP | 74064986 | 7.1643  | 6.6519  | 0.2243  |
| CEU | NPIP | 74069986 | 5.5854  | 6.6519  | -0.4669 |
| CEU | NPIP | 74074986 | 10.1431 | 10.7454 | -0.1695 |
| CEU | NPIP | 74079986 | 10.5191 | 10.0632 | 0.1364  |
| CEU | NPIP | 74084986 | 9.0495  | 8.5281  | 0.1819  |
| CEU | NPIP | 74089986 | 7.2931  | 8.0164  | -0.2672 |
| CEU | NPIP | 74094986 | 5.1979  | 6.4814  | -0.5753 |
| CEU | NPIP | 74099986 | 5.9074  | 7.8459  | -0.7303 |
| CEU | NPIP | 74104986 | 8.5277  | 9.5515  | -0.3216 |
| CEU | NPIP | 74109986 | 7.1604  | 7.5047  | -0.1351 |
| CEU | NPIP | 74114986 | 5.6576  | 5.6286  | 0.0148  |
| CEU | NPIP | 74119986 | 10.5702 | 8.0164  | 0.9433  |
| CEU | NPIP | 74124986 | 13.5403 | 10.916  | 0.7278  |
| CEU | NPIP | 74129986 | 10.5786 | 11.5982 | -0.2671 |
| CEU | NPIP | 74134986 | 6.5866  | 9.3809  | -0.8927 |
| CEU | NPIP | 74139986 | 8.922   | 12.4511 | -0.8649 |
| CEU | NPIP | 74144986 | 10.2266 | 13.8156 | -0.7971 |
| CEU | NPIP | 74149986 | 8.5106  | 10.2337 | -0.5076 |
| CEU | NPIP | 74154986 | 6.9549  | 9.2104  | -0.7329 |
| CEU | NPIP | 74159986 | 4.9918  | 8.3576  | -1.1964 |
| CEU | NPIP | 74164986 | 7.1066  | 7.8459  | -0.2785 |
| CEU | NPIP | 74169986 | 11.341  | 8.5281  | 0.9815  |
| CEU | NPIP | 74174986 | 12.3643 | 10.916  | 0.4017  |
| CEU | NPIP | 74179986 | 10.7322 | 10.0632 | 0.2002  |
| CEU | NPIP | 74184986 | 9.5354  | 7.5047  | 0.7967  |
| CEU | NPIP | 74189986 | 8.2979  | 6.8225  | 0.6313  |
| CEU | NPIP | 74194986 | 10.8677 | 9.2104  | 0.5385  |
| CEU | NPIP | 74199986 | 23.2072 | 14.3272 | 1.9052  |
| CEU | NPIP | 74204986 | 31.4649 | 18.4207 | 2.2011  |
| CEU | NPIP | 74209986 | 19.7629 | 13.8156 | 1.3209  |
| CEU | NPIP | 74214986 | 9.4968  | 9.7221  | -0.0696 |
| CEU | NPIP | 74219986 | 7.1486  | 8.5281  | -0.4813 |
| CEU | NPIP | 74224986 | 7.9431  | 6.9931  | 0.3975  |
| CEU | NPIP | 74229986 | 9.8077  | 7.5047  | 0.9036  |
| CEU | NPIP | 74234986 | 8.7646  | 7.1636  | 0.6554  |

## 2\_TajimasD\_data

|     |      |          |         |         |         |
|-----|------|----------|---------|---------|---------|
| CEU | NPIP | 74239986 | 10.0132 | 8.3576  | 0.5885  |
| CEU | NPIP | 74244986 | 10.1985 | 7.8459  | 0.8863  |
| CEU | NPIP | 74249986 | 9.4637  | 7.6753  | 0.6874  |
| CEU | NPIP | 74254986 | 8.6152  | 7.5047  | 0.4357  |
| CEU | NPIP | 74259986 | 10.2259 | 7.8459  | 0.8966  |
| CEU | NPIP | 74264986 | 9.6813  | 8.8692  | 0.2733  |
| CEU | NPIP | 74269986 | 6.7576  | 8.6987  | -0.665  |
| CEU | NPIP | 74274986 | 5.4704  | 7.6753  | -0.8475 |
| CEU | NPIP | 74279986 | 5.1721  | 7.6753  | -0.9622 |
| CEU | NPIP | 74284986 | 5.0517  | 7.1636  | -0.8645 |
| CEU | NPIP | 74289986 | 3.1977  | 4.6052  | -0.8546 |
| CEU | NPIP | 74294986 | 2.39    | 6.4814  | -1.8338 |
| CEU | NPIP | 74299986 | 4.3939  | 8.8692  | -1.5059 |
| CEU | NPIP | 74304986 | 4.0175  | 6.9931  | -1.245  |
| CEU | NPIP | 74309986 | 4.2845  | 6.9931  | -1.1333 |
| CEU | NPIP | 74314986 | 5.5073  | 6.9931  | -0.6217 |
| CEU | NPIP | 74319986 | 7.9781  | 8.3576  | -0.1349 |
| CEU | NPIP | 74324986 | 8.2569  | 10.7454 | -0.7004 |
| CEU | NPIP | 74329986 | 4.2259  | 8.5281  | -1.5011 |
| CEU | NPIP | 74334986 | 3.0503  | 5.7991  | -1.3615 |
| CEU | NPIP | 74339986 | 2.9509  | 4.9463  | -1.138  |
| CEU | NPIP | 74344986 | 3.1826  | 6.3108  | -1.4362 |
| CEU | NPIP | 74349986 | 3.7858  | 6.8225  | -1.2994 |
| CEU | NPIP | 74354986 | 4.7858  | 6.1402  | -0.6373 |
| CEU | NPIP | 74359986 | 7.8033  | 8.0164  | -0.0787 |
| CEU | NPIP | 74364986 | 7.0676  | 8.6987  | -0.5588 |
| CEU | NPIP | 74369986 | 4.5014  | 8.0164  | -1.2983 |
| CEU | NPIP | 74374986 | 5.0626  | 6.9931  | -0.8078 |
| CEU | NPIP | 74379986 | 5.312   | 7.6753  | -0.9084 |
| CEU | NPIP | 74384986 | 6.8226  | 10.2337 | -1.0049 |
| CEU | NPIP | 74389986 | 9.1003  | 10.916  | -0.5036 |
| CEU | NPIP | 74394986 | 7.8826  | 8.8692  | -0.332  |
| CEU | NPIP | 74399986 | 4.4776  | 5.458   | -0.5125 |
| CEU | NPIP | 74404986 | 4.7316  | 6.1402  | -0.6628 |
| CEU | NPIP | 74409986 | 4.3739  | 6.1402  | -0.8312 |
| CEU | NPIP | 74414986 | 2.9493  | 4.4346  | -0.9319 |
| CEU | NPIP | 74419986 | 3.1251  | 3.9229  | -0.5564 |
| CEU | NPIP | 74424986 | 9.6392  | 7.5047  | 0.8375  |
| CEU | NPIP | 74429986 | 12.4162 | 11.2571 | 0.3123  |
| CEU | NPIP | 74434986 | 7.06    | 7.8459  | -0.2961 |
| CEU | NPIP | 74439986 | 5.7749  | 5.2874  | 0.2621  |
| CEU | NPIP | 74444986 | 4.0171  | 3.7524  | 0.1918  |
| CEU | NPIP | 74449986 | 3.006   | 3.4112  | -0.3183 |
| CEU | NPIP | 74454986 | 7.5933  | 7.6753  | -0.0315 |
| CEU | NPIP | 74459986 | 11.8864 | 11.4277 | 0.1219  |
| CEU | NPIP | 74464986 | 13.8522 | 12.2805 | 0.3902  |
| CEU | NPIP | 74469986 | 17.4937 | 14.3272 | 0.6794  |
| CEU | NPIP | 74474986 | 18.4455 | 15.0095 | 0.7053  |
| CEU | NPIP | 74479986 | 13.5232 | 11.4277 | 0.5567  |

## 2\_TajimasD\_data

|     |      |          |         |         |         |
|-----|------|----------|---------|---------|---------|
| CEU | NPIP | 74484986 | 8.8959  | 8.8692  | 0.009   |
| CEU | NPIP | 74489986 | 7.598   | 8.6987  | -0.3771 |
| CEU | NPIP | 74494986 | 8.8866  | 9.0398  | -0.0507 |
| CEU | NPIP | 74499986 | 13.3537 | 11.4277 | 0.5117  |
| CEU | NPIP | 74504986 | 10.6592 | 9.8926  | 0.2331  |
| CEU | NPIP | 74509986 | 6.8736  | 8.6987  | -0.6253 |
| CEU | NPIP | 74514986 | 7.2387  | 9.5515  | -0.7266 |
| CEU | NPIP | 74519986 | 6.1417  | 8.0164  | -0.6924 |
| CEU | NPIP | 74524986 | 8.6938  | 9.8926  | -0.3645 |
| CEU | NPIP | 74529986 | 8.9654  | 11.2571 | -0.6175 |
| CEU | NPIP | 74534986 | 7.3022  | 11.4277 | -1.0961 |
| CEU | NPIP | 74539986 | 5.7928  | 10.2337 | -1.3083 |
| CEU | NPIP | 74544986 | 5.847   | 10.0632 | -1.2618 |
| CEU | NPIP | 74549986 | 7.9309  | 11.5982 | -0.9609 |
| CEU | NPIP | 74554986 | 5.8423  | 9.0398  | -1.0572 |
| CEU | NPIP | 74559986 | 6.9784  | 9.5515  | -0.8084 |
| CEU | NPIP | 74564986 | 9.894   | 10.916  | -0.2835 |
| CEU | NPIP | 74569986 | 8.8767  | 8.6987  | 0.061   |
| CEU | NPIP | 74574986 | 8.9215  | 9.7221  | -0.2474 |
| CEU | NPIP | 74579986 | 13.1214 | 10.916  | 0.6117  |
| CEU | NPIP | 74584986 | 13.7823 | 9.2104  | 1.4856  |
| CEU | NPIP | 74589986 | 12.765  | 8.8692  | 1.3109  |
| CEU | NPIP | 74594986 | 13.7831 | 9.3809  | 1.4063  |
| CEU | NPIP | 74599986 | 10.2894 | 7.8459  | 0.9205  |
| CEU | NPIP | 74604986 | 8.3937  | 8.5281  | -0.0469 |
| CEU | NPIP | 74609986 | 9.9608  | 10.2337 | -0.0804 |
| CEU | NPIP | 74614986 | 10.6696 | 10.5749 | 0.0271  |
| CEU | NPIP | 74619986 | 12.8376 | 11.4277 | 0.3746  |
| CEU | NPIP | 74624986 | 14.3616 | 12.7922 | 0.3749  |
| CEU | NPIP | 74629986 | 13.3923 | 12.7922 | 0.1434  |
| CEU | NPIP | 74634986 | 13.0932 | 10.0632 | 0.9068  |
| CEU | NPIP | 74639986 | 11.9254 | 9.5515  | 0.7458  |
| CEU | NPIP | 74644986 | 12.4065 | 10.916  | 0.4134  |
| CEU | NPIP | 74649986 | 14.4411 | 10.916  | 0.9777  |
| CEU | NPIP | 74654986 | 15.2773 | 11.9394 | 0.851   |
| CEU | NPIP | 74659986 | 12.9021 | 11.7688 | 0.2929  |
| CEU | NPIP | 74664986 | 11.8174 | 10.0632 | 0.525   |
| CEU | NPIP | 74669986 | 12.5683 | 10.4043 | 0.6278  |
| CEU | NPIP | 74674986 | 12.3521 | 10.2337 | 0.6241  |
| CEU | NPIP | 74679986 | 11.0971 | 9.3809  | 0.5483  |
| CEU | NPIP | 74684986 | 9.9186  | 9.7221  | 0.0607  |
| CEU | NPIP | 74689986 | 11.4574 | 10.7454 | 0.2004  |
| CEU | NPIP | 74694986 | 12.4694 | 11.0866 | 0.378   |
| CEU | NPIP | 74699986 | 14.9192 | 11.9394 | 0.7597  |
| CEU | NPIP | 74704986 | 14.7761 | 11.9394 | 0.7232  |
| CEU | NPIP | 74709986 | 11.7813 | 10.4043 | 0.3995  |
| CEU | NPIP | 74714986 | 8.015   | 9.3809  | -0.4364 |
| CEU | NPIP | 74719986 | 6.8938  | 10.0632 | -0.9485 |
| CEU | NPIP | 74724986 | 5.3941  | 9.3809  | -1.2736 |

## 2\_TajimasD\_data

|     |      |          |         |         |         |
|-----|------|----------|---------|---------|---------|
| CEU | NPIP | 74729986 | 4.0526  | 8.0164  | -1.464  |
| CEU | NPIP | 74734986 | 18.0029 | 12.7922 | 1.2448  |
| CEU | NPIP | 74739986 | 24.9212 | 15.1801 | 1.9781  |
| CEU | NPIP | 74744986 | 16.2728 | 13.1333 | 0.7315  |
| CEU | NPIP | 74749986 | 11.248  | 12.9627 | -0.4045 |
| CEU | NPIP | 74754986 | 10.6933 | 11.0866 | -0.1075 |
| CEU | NPIP | 74759986 | 7.9328  | 8.3576  | -0.151  |
| CEU | NPIP | 74764986 | 4.9011  | 7.6753  | -1.0663 |
| CEU | NPIP | 74769986 | 6.898   | 9.5515  | -0.8336 |
| CEU | NPIP | 74774986 | 7.4743  | 10.916  | -0.9546 |
| CEU | NPIP | 74779986 | 6.6428  | 8.8692  | -0.7492 |
| CEU | NPIP | 74784986 | 11.0934 | 11.5982 | -0.1323 |
| CEU | NPIP | 74789986 | 12.1049 | 12.6216 | -0.125  |
| CEU | NPIP | 74794986 | 13.8685 | 13.1333 | 0.1713  |
| CEU | NPIP | 74799986 | 12.8388 | 13.4744 | -0.1445 |
| CEU | NPIP | 74804986 | 9.9454  | 10.7454 | -0.2252 |
| CEU | NPIP | 74809986 | 12.9326 | 12.1099 | 0.207   |
| CEU | NPIP | 74814986 | 10.8703 | 10.916  | -0.0127 |
| CEU | NPIP | 74819986 | 12.5572 | 11.2571 | 0.3503  |
| CEU | NPIP | 74824986 | 15.685  | 13.1333 | 0.5946  |
| CEU | NPIP | 74829986 | 14.4799 | 12.1099 | 0.5962  |
| CEU | NPIP | 74834986 | 12.1482 | 10.2337 | 0.564   |
| CEU | NPIP | 74839986 | 10.3723 | 8.8692  | 0.5058  |
| CEU | NPIP | 74844986 | 8.8262  | 8.6987  | 0.0437  |
| CEU | NPIP | 74849986 | 7.6162  | 8.5281  | -0.3182 |
| CEU | NPIP | 74854986 | 8.679   | 12.7922 | -0.9826 |
| CEU | NPIP | 74859986 | 10.3509 | 17.2268 | -1.2373 |
| CEU | NPIP | 74864986 | 13.1408 | 15.8623 | -0.5299 |
| CEU | NPIP | 74869986 | 14.2441 | 15.0095 | -0.1571 |
| CEU | NPIP | 74874986 | 31.8969 | 23.0259 | 1.207   |
| CEU | NPIP | 74879986 | 35.8504 | 22.8554 | 1.7809  |
| CEU | NPIP | 74884986 | 23.7292 | 16.8857 | 1.2553  |
| CHB | NPIP | 73879986 | 3.0036  | 11.5202 | -2.2391 |
| CHB | NPIP | 73884986 | 2.92    | 10.1649 | -2.1417 |
| CHB | NPIP | 73889986 | 4.7733  | 9.8261  | -1.5416 |
| CHB | NPIP | 73894986 | 4.7251  | 7.4543  | -1.0743 |
| CHB | NPIP | 73899986 | 4.435   | 8.8096  | -1.477  |
| CHB | NPIP | 73904986 | 3.6859  | 8.979   | -1.7559 |
| CHB | NPIP | 73909986 | 3.3394  | 8.3013  | -1.7696 |
| CHB | NPIP | 73914986 | 4.661   | 10.3343 | -1.6514 |
| CHB | NPIP | 73919986 | 4.2447  | 10.5037 | -1.7944 |
| CHB | NPIP | 73924986 | 2.7469  | 8.4708  | -2.0038 |
| CHB | NPIP | 73929986 | 3.3718  | 7.9625  | -1.7012 |
| CHB | NPIP | 73934986 | 3.2994  | 8.6402  | -1.8358 |
| CHB | NPIP | 73939986 | 2.1466  | 7.9625  | -2.1552 |
| CHB | NPIP | 73944986 | 2.2621  | 5.9295  | -1.7754 |
| CHB | NPIP | 73949986 | 3.941   | 5.5907  | -0.8417 |
| CHB | NPIP | 73954986 | 4.9903  | 7.4543  | -0.9699 |
| CHB | NPIP | 73959986 | 4.1557  | 6.7766  | -1.1251 |



## 2\_TajimasD\_data

|     |      |          |         |         |         |
|-----|------|----------|---------|---------|---------|
| CHB | NPIP | 73964986 | 5.2823  | 7.1154  | -0.7528 |
| CHB | NPIP | 73969986 | 5.6534  | 8.3013  | -0.9444 |
| CHB | NPIP | 73974986 | 5.6362  | 8.1319  | -0.9071 |
| CHB | NPIP | 73979986 | 5.2896  | 7.7931  | -0.9462 |
| CHB | NPIP | 73984986 | 4.34    | 6.6072  | -0.9958 |
| CHB | NPIP | 73989986 | 3.3965  | 6.2684  | -1.3227 |
| CHB | NPIP | 73994986 | 4.2796  | 7.2848  | -1.208  |
| CHB | NPIP | 73999986 | 4.2974  | 7.6237  | -1.2827 |
| CHB | NPIP | 74004986 | 4.0268  | 8.3013  | -1.5245 |
| CHB | NPIP | 74009986 | 7.165   | 9.3178  | -0.6901 |
| CHB | NPIP | 74014986 | 6.1306  | 6.946   | -0.3423 |
| CHB | NPIP | 74019986 | 5.0666  | 7.1154  | -0.8414 |
| CHB | NPIP | 74024986 | 6.0312  | 9.1484  | -1.0163 |
| CHB | NPIP | 74029986 | 5.7455  | 7.6237  | -0.7243 |
| CHB | NPIP | 74034986 | 6.3318  | 7.6237  | -0.4982 |
| CHB | NPIP | 74039986 | 7.5245  | 8.3013  | -0.277  |
| CHB | NPIP | 74044986 | 7.3463  | 8.3013  | -0.3406 |
| CHB | NPIP | 74049986 | 5.2275  | 7.4543  | -0.8765 |
| CHB | NPIP | 74054986 | 8.1972  | 8.6402  | -0.1523 |
| CHB | NPIP | 74059986 | 11.1609 | 11.5202 | -0.0945 |
| CHB | NPIP | 74064986 | 6.9878  | 8.979   | -0.6605 |
| CHB | NPIP | 74069986 | 6.1232  | 9.4872  | -1.0604 |
| CHB | NPIP | 74074986 | 9.5707  | 11.012  | -0.3953 |
| CHB | NPIP | 74079986 | 9.7213  | 8.8096  | 0.3078  |
| CHB | NPIP | 74084986 | 8.7129  | 8.4708  | 0.0848  |
| CHB | NPIP | 74089986 | 7.2974  | 9.4872  | -0.6903 |
| CHB | NPIP | 74094986 | 6.0615  | 9.9955  | -1.1813 |
| CHB | NPIP | 74099986 | 6.1034  | 10.6731 | -1.2907 |
| CHB | NPIP | 74104986 | 8.2279  | 12.0285 | -0.9595 |
| CHB | NPIP | 74109986 | 8.3836  | 10.3343 | -0.5678 |
| CHB | NPIP | 74114986 | 5.8688  | 9.9955  | -1.2392 |
| CHB | NPIP | 74119986 | 8.3194  | 13.3838 | -1.1558 |
| CHB | NPIP | 74124986 | 10.1748 | 14.2309 | -0.8733 |
| CHB | NPIP | 74129986 | 6.3739  | 13.2144 | -1.5801 |
| CHB | NPIP | 74134986 | 4.7483  | 10.5037 | -1.6501 |
| CHB | NPIP | 74139986 | 8.8127  | 10.6731 | -0.5254 |
| CHB | NPIP | 74144986 | 9.9848  | 11.012  | -0.2818 |
| CHB | NPIP | 74149986 | 8.3952  | 10.5037 | -0.6045 |
| CHB | NPIP | 74154986 | 5.7177  | 10.6731 | -1.3996 |
| CHB | NPIP | 74159986 | 3.1449  | 9.1484  | -1.9574 |
| CHB | NPIP | 74164986 | 7.7632  | 9.8261  | -0.6294 |
| CHB | NPIP | 74169986 | 13.6109 | 9.8261  | 1.1547  |
| CHB | NPIP | 74174986 | 13.4407 | 10.3343 | 0.9042  |
| CHB | NPIP | 74179986 | 11.3379 | 10.6731 | 0.1878  |
| CHB | NPIP | 74184986 | 10.0763 | 8.4708  | 0.562   |
| CHB | NPIP | 74189986 | 10.3196 | 7.9625  | 0.8735  |
| CHB | NPIP | 74194986 | 11.815  | 9.1484  | 0.8694  |
| CHB | NPIP | 74199986 | 21.2658 | 13.3838 | 1.7989  |
| CHB | NPIP | 74204986 | 30.3965 | 16.2638 | 2.6793  |

## 2\_TajimasD\_data

|     |      |          |         |         |         |
|-----|------|----------|---------|---------|---------|
| CHB | NPIP | 74209986 | 19.3969 | 11.012  | 2.2999  |
| CHB | NPIP | 74214986 | 8.3758  | 8.1319  | 0.0887  |
| CHB | NPIP | 74219986 | 5.5456  | 7.7931  | -0.8494 |
| CHB | NPIP | 74224986 | 7.4849  | 8.4708  | -0.3451 |
| CHB | NPIP | 74229986 | 10.0131 | 9.3178  | 0.2229  |
| CHB | NPIP | 74234986 | 8.0619  | 8.8096  | -0.2524 |
| CHB | NPIP | 74239986 | 9.237   | 10.6731 | -0.4056 |
| CHB | NPIP | 74244986 | 9.5254  | 9.4872  | 0.012   |
| CHB | NPIP | 74249986 | 8.8925  | 7.2848  | 0.6462  |
| CHB | NPIP | 74254986 | 7.7088  | 8.3013  | -0.2113 |
| CHB | NPIP | 74259986 | 8.0786  | 8.6402  | -0.193  |
| CHB | NPIP | 74264986 | 7.5475  | 7.4543  | 0.0367  |
| CHB | NPIP | 74269986 | 5.0091  | 8.8096  | -1.2832 |
| CHB | NPIP | 74274986 | 4.0388  | 9.9955  | -1.7887 |
| CHB | NPIP | 74279986 | 4.1259  | 10.8426 | -1.8693 |
| CHB | NPIP | 74284986 | 4.1568  | 11.5202 | -1.936  |
| CHB | NPIP | 74289986 | 2.8456  | 10.5037 | -2.1956 |
| CHB | NPIP | 74294986 | 3.5844  | 8.4708  | -1.7106 |
| CHB | NPIP | 74299986 | 5.8492  | 7.2848  | -0.5771 |
| CHB | NPIP | 74304986 | 4.6398  | 6.7766  | -0.9173 |
| CHB | NPIP | 74309986 | 5.2281  | 8.1319  | -1.0555 |
| CHB | NPIP | 74314986 | 6.335   | 9.4872  | -0.9936 |
| CHB | NPIP | 74319986 | 6.9744  | 10.3343 | -0.978  |
| CHB | NPIP | 74324986 | 6.4384  | 8.979   | -0.8428 |
| CHB | NPIP | 74329986 | 3.4666  | 6.7766  | -1.4209 |
| CHB | NPIP | 74334986 | 2.9263  | 6.2684  | -1.5393 |
| CHB | NPIP | 74339986 | 3.0961  | 5.2519  | -1.1627 |
| CHB | NPIP | 74344986 | 3.8763  | 7.6237  | -1.4451 |
| CHB | NPIP | 74349986 | 4.2669  | 8.6402  | -1.5033 |
| CHB | NPIP | 74354986 | 4.3828  | 8.8096  | -1.4946 |
| CHB | NPIP | 74359986 | 6.2041  | 9.9955  | -1.1385 |
| CHB | NPIP | 74364986 | 5.1591  | 9.1484  | -1.3007 |
| CHB | NPIP | 74369986 | 3.3326  | 11.012  | -2.1064 |
| CHB | NPIP | 74374986 | 3.8361  | 11.6896 | -2.0367 |
| CHB | NPIP | 74379986 | 3.9537  | 11.1814 | -1.9543 |
| CHB | NPIP | 74384986 | 5.3463  | 13.892  | -1.8826 |
| CHB | NPIP | 74389986 | 7.0643  | 13.3838 | -1.4423 |
| CHB | NPIP | 74394986 | 6.3111  | 9.8261  | -1.0724 |
| CHB | NPIP | 74399986 | 4.2351  | 7.7931  | -1.3447 |
| CHB | NPIP | 74404986 | 4.7599  | 8.8096  | -1.3673 |
| CHB | NPIP | 74409986 | 4.5349  | 7.7931  | -1.2314 |
| CHB | NPIP | 74414986 | 2.5332  | 4.913   | -1.3612 |
| CHB | NPIP | 74419986 | 2.723   | 3.3883  | -0.5239 |
| CHB | NPIP | 74424986 | 9.3269  | 6.2684  | 1.4086  |
| CHB | NPIP | 74429986 | 12.5313 | 8.979   | 1.1784  |
| CHB | NPIP | 74434986 | 7.1527  | 6.4378  | 0.3214  |
| CHB | NPIP | 74439986 | 5.0828  | 4.5742  | 0.3097  |
| CHB | NPIP | 74444986 | 3.8755  | 4.066   | -0.1285 |
| CHB | NPIP | 74449986 | 2.7788  | 5.7601  | -1.4812 |

## 2\_TajimasD\_data

|     |      |          |         |         |         |
|-----|------|----------|---------|---------|---------|
| CHB | NPIP | 74454986 | 6.4649  | 9.1484  | -0.8749 |
| CHB | NPIP | 74459986 | 11.7179 | 9.4872  | 0.7032  |
| CHB | NPIP | 74464986 | 15.2001 | 11.8591 | 0.8548  |
| CHB | NPIP | 74469986 | 18.0902 | 16.4333 | 0.311   |
| CHB | NPIP | 74474986 | 18.3906 | 16.4333 | 0.3674  |
| CHB | NPIP | 74479986 | 12.0563 | 11.8591 | 0.0505  |
| CHB | NPIP | 74484986 | 6.7039  | 9.3178  | -0.8379 |
| CHB | NPIP | 74489986 | 5.8836  | 10.6731 | -1.3527 |
| CHB | NPIP | 74494986 | 6.3119  | 11.6896 | -1.3946 |
| CHB | NPIP | 74499986 | 9.0962  | 12.7061 | -0.8654 |
| CHB | NPIP | 74504986 | 7.7146  | 11.1814 | -0.9374 |
| CHB | NPIP | 74509986 | 4.5271  | 9.8261  | -1.6167 |
| CHB | NPIP | 74514986 | 3.9928  | 9.8261  | -1.7797 |
| CHB | NPIP | 74519986 | 4.091   | 9.4872  | -1.701  |
| CHB | NPIP | 74524986 | 6.5682  | 9.3178  | -0.8814 |
| CHB | NPIP | 74529986 | 6.5198  | 8.8096  | -0.7731 |
| CHB | NPIP | 74534986 | 4.6007  | 10.1649 | -1.6448 |
| CHB | NPIP | 74539986 | 4.4285  | 10.8426 | -1.7851 |
| CHB | NPIP | 74544986 | 5.9695  | 9.8261  | -1.1767 |
| CHB | NPIP | 74549986 | 6.1947  | 9.6567  | -1.0735 |
| CHB | NPIP | 74554986 | 3.4441  | 9.1484  | -1.8598 |
| CHB | NPIP | 74559986 | 4.1565  | 9.4872  | -1.6804 |
| CHB | NPIP | 74564986 | 6.8932  | 10.5037 | -1.0351 |
| CHB | NPIP | 74569986 | 6.7026  | 9.1484  | -0.7974 |
| CHB | NPIP | 74574986 | 5.5958  | 9.1484  | -1.1583 |
| CHB | NPIP | 74579986 | 8.0798  | 12.7061 | -1.109  |
| CHB | NPIP | 74584986 | 9.0918  | 12.1979 | -0.7739 |
| CHB | NPIP | 74589986 | 8.3903  | 8.8096  | -0.1416 |
| CHB | NPIP | 74594986 | 8.8226  | 9.4872  | -0.2095 |
| CHB | NPIP | 74599986 | 7.0721  | 10.8426 | -1.0493 |
| CHB | NPIP | 74604986 | 5.6107  | 9.6567  | -1.2546 |
| CHB | NPIP | 74609986 | 6.4584  | 10.5037 | -1.1598 |
| CHB | NPIP | 74614986 | 6.8346  | 11.1814 | -1.1753 |
| CHB | NPIP | 74619986 | 7.2526  | 11.3508 | -1.0926 |
| CHB | NPIP | 74624986 | 8.8456  | 12.8755 | -0.954  |
| CHB | NPIP | 74629986 | 9.9772  | 11.3508 | -0.3662 |
| CHB | NPIP | 74634986 | 10.3014 | 11.012  | -0.1949 |
| CHB | NPIP | 74639986 | 8.6235  | 11.5202 | -0.7616 |
| CHB | NPIP | 74644986 | 8.2998  | 10.8426 | -0.7077 |
| CHB | NPIP | 74649986 | 10.1072 | 11.012  | -0.2482 |
| CHB | NPIP | 74654986 | 10.49   | 12.1979 | -0.4255 |
| CHB | NPIP | 74659986 | 8.4788  | 11.012  | -0.6948 |
| CHB | NPIP | 74664986 | 8.2012  | 10.8426 | -0.7351 |
| CHB | NPIP | 74669986 | 8.399   | 10.8426 | -0.6801 |
| CHB | NPIP | 74674986 | 8.4308  | 9.9955  | -0.4699 |
| CHB | NPIP | 74679986 | 8.3284  | 11.3508 | -0.8058 |
| CHB | NPIP | 74684986 | 7.0019  | 9.1484  | -0.6998 |
| CHB | NPIP | 74689986 | 7.7826  | 9.1484  | -0.4453 |
| CHB | NPIP | 74694986 | 7.9395  | 12.1979 | -1.0609 |

## 2\_TajimasD\_data

|     |      |          |         |         |         |
|-----|------|----------|---------|---------|---------|
| CHB | NPIP | 74699986 | 9.5928  | 14.9085 | -1.095  |
| CHB | NPIP | 74704986 | 9.5307  | 14.9085 | -1.1078 |
| CHB | NPIP | 74709986 | 7.8601  | 12.7061 | -1.1617 |
| CHB | NPIP | 74714986 | 7.2037  | 10.5037 | -0.9461 |
| CHB | NPIP | 74719986 | 8.1695  | 8.8096  | -0.2161 |
| CHB | NPIP | 74724986 | 6.2794  | 7.7931  | -0.5721 |
| CHB | NPIP | 74729986 | 4.0122  | 8.6402  | -1.5908 |
| CHB | NPIP | 74734986 | 12.9046 | 13.892  | -0.2175 |
| CHB | NPIP | 74739986 | 17.0735 | 16.4333 | 0.1202  |
| CHB | NPIP | 74744986 | 12.2678 | 15.2474 | -0.6008 |
| CHB | NPIP | 74749986 | 8.4672  | 16.0944 | -1.4605 |
| CHB | NPIP | 74754986 | 8.2172  | 14.9085 | -1.3784 |
| CHB | NPIP | 74759986 | 8.4642  | 11.012  | -0.6988 |
| CHB | NPIP | 74764986 | 7.8002  | 10.8426 | -0.8467 |
| CHB | NPIP | 74769986 | 8.3253  | 12.0285 | -0.9349 |
| CHB | NPIP | 74774986 | 7.4002  | 10.5037 | -0.8898 |
| CHB | NPIP | 74779986 | 7.3172  | 8.4708  | -0.4038 |
| CHB | NPIP | 74784986 | 11.0055 | 10.5037 | 0.1439  |
| CHB | NPIP | 74789986 | 11.3425 | 13.045  | -0.3981 |
| CHB | NPIP | 74794986 | 11.1847 | 14.5697 | -0.7127 |
| CHB | NPIP | 74799986 | 10.0468 | 13.2144 | -0.7317 |
| CHB | NPIP | 74804986 | 7.4495  | 11.5202 | -1.0703 |
| CHB | NPIP | 74809986 | 8.3665  | 13.892  | -1.2173 |
| CHB | NPIP | 74814986 | 5.9926  | 11.3508 | -1.4285 |
| CHB | NPIP | 74819986 | 8.1395  | 9.4872  | -0.4248 |
| CHB | NPIP | 74824986 | 11.0535 | 12.7061 | -0.3962 |
| CHB | NPIP | 74829986 | 8.0944  | 12.3673 | -1.0508 |
| CHB | NPIP | 74834986 | 5.4653  | 9.3178  | -1.2349 |
| CHB | NPIP | 74839986 | 6.1681  | 9.1484  | -0.9717 |
| CHB | NPIP | 74844986 | 9.2263  | 12.0285 | -0.7074 |
| CHB | NPIP | 74849986 | 8.0819  | 11.5202 | -0.904  |
| CHB | NPIP | 74854986 | 5.3246  | 10.6731 | -1.5106 |
| CHB | NPIP | 74859986 | 6.969   | 12.7061 | -1.3753 |
| CHB | NPIP | 74864986 | 10.8222 | 12.1979 | -0.3427 |
| CHB | NPIP | 74869986 | 11.5662 | 14.5697 | -0.6324 |
| CHB | NPIP | 74874986 | 28.8804 | 25.4123 | 0.4276  |
| CHB | NPIP | 74879986 | 31.7365 | 23.2099 | 1.148   |
| CHB | NPIP | 74884986 | 16.3427 | 19.4827 | -0.5006 |
| YRI | NPIP | 73879986 | 8.8721  | 15.9659 | -1.3642 |
| YRI | NPIP | 73884986 | 8.5363  | 15.9659 | -1.4288 |
| YRI | NPIP | 73889986 | 8.6313  | 14.6214 | -1.2527 |
| YRI | NPIP | 73894986 | 6.7976  | 13.1089 | -1.464  |
| YRI | NPIP | 73899986 | 8.4859  | 16.6382 | -1.5072 |
| YRI | NPIP | 73904986 | 8.9481  | 17.4785 | -1.5044 |
| YRI | NPIP | 73909986 | 8.0043  | 16.4701 | -1.5804 |
| YRI | NPIP | 73914986 | 9.4707  | 16.134  | -1.2687 |
| YRI | NPIP | 73919986 | 9.2455  | 14.6214 | -1.1243 |
| YRI | NPIP | 73924986 | 6.9357  | 14.4534 | -1.5896 |
| YRI | NPIP | 73929986 | 7.5219  | 14.2853 | -1.4461 |

## 2\_TajimasD\_data

|     |      |          |         |         |         |
|-----|------|----------|---------|---------|---------|
| YRI | NPIP | 73934986 | 8.0903  | 13.2769 | -1.1887 |
| YRI | NPIP | 73939986 | 6.9387  | 12.9408 | -1.4094 |
| YRI | NPIP | 73944986 | 7.1467  | 13.9492 | -1.4877 |
| YRI | NPIP | 73949986 | 7.4129  | 14.6214 | -1.5075 |
| YRI | NPIP | 73954986 | 6.5777  | 13.2769 | -1.5354 |
| YRI | NPIP | 73959986 | 6.5841  | 13.1089 | -1.5135 |
| YRI | NPIP | 73964986 | 6.6918  | 14.1172 | -1.6056 |
| YRI | NPIP | 73969986 | 6.4374  | 11.7644 | -1.3685 |
| YRI | NPIP | 73974986 | 7.6023  | 11.0921 | -0.9475 |
| YRI | NPIP | 73979986 | 6.9526  | 15.1256 | -1.655  |
| YRI | NPIP | 73984986 | 5.7046  | 14.4534 | -1.8499 |
| YRI | NPIP | 73989986 | 6.0986  | 10.756  | -1.3015 |
| YRI | NPIP | 73994986 | 7.9886  | 12.4366 | -1.0844 |
| YRI | NPIP | 73999986 | 6.3304  | 13.1089 | -1.5724 |
| YRI | NPIP | 74004986 | 6.4437  | 12.6047 | -1.4831 |
| YRI | NPIP | 74009986 | 10.9992 | 14.2853 | -0.7026 |
| YRI | NPIP | 74014986 | 8.8756  | 12.7727 | -0.9265 |
| YRI | NPIP | 74019986 | 6.925   | 10.924  | -1.1014 |
| YRI | NPIP | 74024986 | 8.6128  | 12.9408 | -1.0163 |
| YRI | NPIP | 74029986 | 7.342   | 12.4366 | -1.2421 |
| YRI | NPIP | 74034986 | 7.3877  | 11.5963 | -1.0959 |
| YRI | NPIP | 74039986 | 8.4487  | 12.6047 | -1.0005 |
| YRI | NPIP | 74044986 | 8.8706  | 12.4366 | -0.8694 |
| YRI | NPIP | 74049986 | 9.2028  | 12.6047 | -0.8189 |
| YRI | NPIP | 74054986 | 11.6536 | 15.1256 | -0.703  |
| YRI | NPIP | 74059986 | 13.5636 | 18.1507 | -0.7802 |
| YRI | NPIP | 74064986 | 8.6502  | 14.4534 | -1.2271 |
| YRI | NPIP | 74069986 | 10.2209 | 14.2853 | -0.869  |
| YRI | NPIP | 74074986 | 14.09   | 16.8062 | -0.4974 |
| YRI | NPIP | 74079986 | 11.6874 | 16.302  | -0.87   |
| YRI | NPIP | 74084986 | 11.9307 | 15.9659 | -0.776  |
| YRI | NPIP | 74089986 | 10.5672 | 15.2937 | -0.947  |
| YRI | NPIP | 74094986 | 8.3881  | 13.1089 | -1.0951 |
| YRI | NPIP | 74099986 | 10.8069 | 13.2769 | -0.5661 |
| YRI | NPIP | 74104986 | 14.4027 | 16.302  | -0.3581 |
| YRI | NPIP | 74109986 | 11.7611 | 14.6214 | -0.5982 |
| YRI | NPIP | 74114986 | 9.8371  | 12.6047 | -0.6662 |
| YRI | NPIP | 74119986 | 17.0792 | 16.134  | 0.18    |
| YRI | NPIP | 74124986 | 20.0194 | 20.5036 | -0.0732 |
| YRI | NPIP | 74129986 | 15.4059 | 18.991  | -0.5838 |
| YRI | NPIP | 74134986 | 9.9855  | 14.1172 | -0.8934 |
| YRI | NPIP | 74139986 | 14.5104 | 15.4617 | -0.1886 |
| YRI | NPIP | 74144986 | 16.3926 | 14.9575 | 0.2937  |
| YRI | NPIP | 74149986 | 11.4811 | 13.9492 | -0.5398 |
| YRI | NPIP | 74154986 | 9.9161  | 14.9575 | -1.0318 |
| YRI | NPIP | 74159986 | 7.3193  | 11.9324 | -1.1694 |
| YRI | NPIP | 74164986 | 9.3731  | 12.9408 | -0.8377 |
| YRI | NPIP | 74169986 | 11.4873 | 15.7978 | -0.8374 |
| YRI | NPIP | 74174986 | 9.3562  | 17.4785 | -1.4324 |

## 2\_TajimasD\_data

|     |      |          |         |         |         |
|-----|------|----------|---------|---------|---------|
| YRI | NPIP | 74179986 | 8.1477  | 15.6298 | -1.4684 |
| YRI | NPIP | 74184986 | 8.66    | 13.613  | -1.1086 |
| YRI | NPIP | 74189986 | 8.8067  | 14.4534 | -1.194  |
| YRI | NPIP | 74194986 | 11.6428 | 12.7727 | -0.2686 |
| YRI | NPIP | 74199986 | 23.8635 | 15.7978 | 1.5669  |
| YRI | NPIP | 74204986 | 32.7138 | 20.1675 | 1.9283  |
| YRI | NPIP | 74209986 | 20.7838 | 14.7895 | 1.24    |
| YRI | NPIP | 74214986 | 9.9124  | 10.756  | -0.2357 |
| YRI | NPIP | 74219986 | 7.8507  | 9.2434  | -0.4482 |
| YRI | NPIP | 74224986 | 9.0356  | 11.0921 | -0.5584 |
| YRI | NPIP | 74229986 | 10.9134 | 13.445  | -0.5733 |
| YRI | NPIP | 74234986 | 9.3244  | 10.924  | -0.4406 |
| YRI | NPIP | 74239986 | 10.7292 | 11.2602 | -0.1421 |
| YRI | NPIP | 74244986 | 10.8778 | 10.0837 | 0.2357  |
| YRI | NPIP | 74249986 | 9.5138  | 9.5795  | -0.0205 |
| YRI | NPIP | 74254986 | 9.2379  | 10.5879 | -0.3829 |
| YRI | NPIP | 74259986 | 10.4359 | 9.5795  | 0.2666  |
| YRI | NPIP | 74264986 | 9.44    | 9.4115  | 0.009   |
| YRI | NPIP | 74269986 | 7.6636  | 11.4282 | -0.9939 |
| YRI | NPIP | 74274986 | 7.2164  | 12.7727 | -1.3209 |
| YRI | NPIP | 74279986 | 8.143   | 13.9492 | -1.2698 |
| YRI | NPIP | 74284986 | 8.7433  | 14.1172 | -1.162  |
| YRI | NPIP | 74289986 | 6.2473  | 11.4282 | -1.3678 |
| YRI | NPIP | 74294986 | 4.3789  | 9.7476  | -1.6446 |
| YRI | NPIP | 74299986 | 4.5339  | 10.4199 | -1.6944 |
| YRI | NPIP | 74304986 | 4.4858  | 11.2602 | -1.8135 |
| YRI | NPIP | 74309986 | 5.4155  | 12.4366 | -1.7117 |
| YRI | NPIP | 74314986 | 5.9623  | 12.7727 | -1.6191 |
| YRI | NPIP | 74319986 | 8.4508  | 11.2602 | -0.7521 |
| YRI | NPIP | 74324986 | 8.8534  | 11.9324 | -0.7805 |
| YRI | NPIP | 74329986 | 5.2839  | 11.0921 | -1.577  |
| YRI | NPIP | 74334986 | 4.0028  | 8.067   | -1.483  |
| YRI | NPIP | 74339986 | 4.1998  | 8.7392  | -1.5387 |
| YRI | NPIP | 74344986 | 6.2622  | 13.1089 | -1.5882 |
| YRI | NPIP | 74349986 | 6.4351  | 14.4534 | -1.6954 |
| YRI | NPIP | 74354986 | 6.7397  | 13.613  | -1.5384 |
| YRI | NPIP | 74359986 | 9.5812  | 15.7978 | -1.2077 |
| YRI | NPIP | 74364986 | 8.2671  | 14.6214 | -1.3289 |
| YRI | NPIP | 74369986 | 7.5252  | 15.1256 | -1.539  |
| YRI | NPIP | 74374986 | 8.6109  | 15.4617 | -1.3585 |
| YRI | NPIP | 74379986 | 7.2692  | 12.6047 | -1.2844 |
| YRI | NPIP | 74384986 | 8.7914  | 15.1256 | -1.2826 |
| YRI | NPIP | 74389986 | 11.0284 | 16.134  | -0.9721 |
| YRI | NPIP | 74394986 | 9.3453  | 12.7727 | -0.8148 |
| YRI | NPIP | 74399986 | 6.0806  | 10.2518 | -1.2191 |
| YRI | NPIP | 74404986 | 6.0718  | 12.6047 | -1.5727 |
| YRI | NPIP | 74409986 | 5.4688  | 10.756  | -1.4775 |
| YRI | NPIP | 74414986 | 3.6084  | 5.0419  | -0.7987 |
| YRI | NPIP | 74419986 | 3.1539  | 4.3696  | -0.7676 |

## 2\_TajimasD\_data

|     |      |          |         |         |         |
|-----|------|----------|---------|---------|---------|
| YRI | NPIP | 74424986 | 8.6277  | 11.5963 | -0.773  |
| YRI | NPIP | 74429986 | 11.3303 | 16.302  | -0.9373 |
| YRI | NPIP | 74434986 | 7.1507  | 10.756  | -1.0075 |
| YRI | NPIP | 74439986 | 5.9532  | 6.8906  | -0.395  |
| YRI | NPIP | 74444986 | 4.9507  | 5.8822  | -0.4526 |
| YRI | NPIP | 74449986 | 3.6526  | 6.0502  | -1.136  |
| YRI | NPIP | 74454986 | 7.1761  | 9.9157  | -0.826  |
| YRI | NPIP | 74459986 | 11.5415 | 13.1089 | -0.3636 |
| YRI | NPIP | 74464986 | 13.2789 | 14.6214 | -0.2808 |
| YRI | NPIP | 74469986 | 18.3345 | 17.8146 | 0.09    |
| YRI | NPIP | 74474986 | 18.7492 | 18.3188 | 0.0726  |
| YRI | NPIP | 74479986 | 12.0133 | 14.2853 | -0.4858 |
| YRI | NPIP | 74484986 | 8.4984  | 12.2685 | -0.931  |
| YRI | NPIP | 74489986 | 8.3316  | 10.924  | -0.714  |
| YRI | NPIP | 74494986 | 9.4262  | 12.2685 | -0.7019 |
| YRI | NPIP | 74499986 | 10.9058 | 15.4617 | -0.9034 |
| YRI | NPIP | 74504986 | 8.9771  | 13.613  | -1.0376 |
| YRI | NPIP | 74509986 | 7.4965  | 12.4366 | -1.2044 |
| YRI | NPIP | 74514986 | 6.8872  | 10.4199 | -1.017  |
| YRI | NPIP | 74519986 | 5.6817  | 9.9157  | -1.2766 |
| YRI | NPIP | 74524986 | 7.1121  | 12.2685 | -1.2734 |
| YRI | NPIP | 74529986 | 8.3965  | 13.7811 | -1.1912 |
| YRI | NPIP | 74534986 | 8.7194  | 15.7978 | -1.3751 |
| YRI | NPIP | 74539986 | 7.1878  | 13.613  | -1.4381 |
| YRI | NPIP | 74544986 | 7.07    | 12.9408 | -1.3786 |
| YRI | NPIP | 74549986 | 7.6927  | 14.1172 | -1.3892 |
| YRI | NPIP | 74554986 | 4.6951  | 10.2518 | -1.6241 |
| YRI | NPIP | 74559986 | 5.5769  | 9.4115  | -1.2136 |
| YRI | NPIP | 74564986 | 8.6935  | 12.6047 | -0.9415 |
| YRI | NPIP | 74569986 | 8.3979  | 11.5963 | -0.8329 |
| YRI | NPIP | 74574986 | 8.0856  | 11.4282 | -0.8825 |
| YRI | NPIP | 74579986 | 10.4971 | 13.1089 | -0.6058 |
| YRI | NPIP | 74584986 | 11.1215 | 12.2685 | -0.2832 |
| YRI | NPIP | 74589986 | 10.1556 | 11.5963 | -0.3752 |
| YRI | NPIP | 74594986 | 10.0219 | 11.4282 | -0.3713 |
| YRI | NPIP | 74599986 | 6.8461  | 11.5963 | -1.237  |
| YRI | NPIP | 74604986 | 4.9837  | 10.756  | -1.6131 |
| YRI | NPIP | 74609986 | 6.247   | 10.756  | -1.26   |
| YRI | NPIP | 74614986 | 6.7904  | 11.2602 | -1.1966 |
| YRI | NPIP | 74619986 | 8.1403  | 13.613  | -1.2249 |
| YRI | NPIP | 74624986 | 8.8885  | 14.6214 | -1.1989 |
| YRI | NPIP | 74629986 | 8.9264  | 14.2853 | -1.1458 |
| YRI | NPIP | 74634986 | 8.5197  | 12.6047 | -0.9834 |
| YRI | NPIP | 74639986 | 7.229   | 10.924  | -1.0177 |
| YRI | NPIP | 74644986 | 7.8766  | 13.445  | -1.2611 |
| YRI | NPIP | 74649986 | 9.8425  | 14.9575 | -1.0468 |
| YRI | NPIP | 74654986 | 11.3255 | 14.1172 | -0.6036 |
| YRI | NPIP | 74659986 | 9.1568  | 10.756  | -0.4469 |
| YRI | NPIP | 74664986 | 6.8107  | 10.756  | -1.1025 |

## 2\_TajimasD\_data

|     |      |          |         |         |         |
|-----|------|----------|---------|---------|---------|
| YRI | NPIP | 74669986 | 7.1025  | 13.445  | -1.4364 |
| YRI | NPIP | 74674986 | 7.7164  | 12.6047 | -1.1768 |
| YRI | NPIP | 74679986 | 6.8639  | 10.924  | -1.1182 |
| YRI | NPIP | 74684986 | 5.4142  | 11.7644 | -1.6314 |
| YRI | NPIP | 74689986 | 6.5511  | 14.1172 | -1.636  |
| YRI | NPIP | 74694986 | 8.3519  | 15.1256 | -1.3716 |
| YRI | NPIP | 74699986 | 10.8227 | 18.1507 | -1.2464 |
| YRI | NPIP | 74704986 | 10.8472 | 16.8062 | -1.0911 |
| YRI | NPIP | 74709986 | 10.493  | 13.2769 | -0.638  |
| YRI | NPIP | 74714986 | 8.8185  | 11.4282 | -0.689  |
| YRI | NPIP | 74719986 | 7.9432  | 12.2685 | -1.0681 |
| YRI | NPIP | 74724986 | 7.503   | 12.9408 | -1.2769 |
| YRI | NPIP | 74729986 | 7.5971  | 11.5963 | -1.0414 |
| YRI | NPIP | 74734986 | 19.0463 | 17.6465 | 0.2446  |
| YRI | NPIP | 74739986 | 24.3557 | 21.3439 | 0.4383  |
| YRI | NPIP | 74744986 | 19.9905 | 18.6549 | 0.2213  |
| YRI | NPIP | 74749986 | 18.3056 | 18.991  | -0.1116 |
| YRI | NPIP | 74754986 | 13.1455 | 18.4868 | -0.8926 |
| YRI | NPIP | 74759986 | 7.616   | 15.1256 | -1.5206 |
| YRI | NPIP | 74764986 | 7.5702  | 14.2853 | -1.4358 |
| YRI | NPIP | 74769986 | 9.3012  | 14.9575 | -1.1576 |
| YRI | NPIP | 74774986 | 8.8191  | 14.1172 | -1.1456 |
| YRI | NPIP | 74779986 | 7.4521  | 11.4282 | -1.0497 |
| YRI | NPIP | 74784986 | 9.9455  | 13.445  | -0.7925 |
| YRI | NPIP | 74789986 | 13.8983 | 17.4785 | -0.6314 |
| YRI | NPIP | 74794986 | 17.954  | 19.8313 | -0.2932 |
| YRI | NPIP | 74799986 | 15.0325 | 17.9827 | -0.5063 |
| YRI | NPIP | 74804986 | 11.7236 | 16.302  | -0.8631 |
| YRI | NPIP | 74809986 | 13.115  | 17.1423 | -0.7236 |
| YRI | NPIP | 74814986 | 10.4495 | 15.2937 | -0.9706 |
| YRI | NPIP | 74819986 | 11.0604 | 16.302  | -0.9882 |
| YRI | NPIP | 74824986 | 15.4677 | 17.1423 | -0.3009 |
| YRI | NPIP | 74829986 | 15.5056 | 16.134  | -0.1196 |
| YRI | NPIP | 74834986 | 11.7488 | 14.7895 | -0.629  |
| YRI | NPIP | 74839986 | 10.8005 | 13.613  | -0.6295 |
| YRI | NPIP | 74844986 | 11.3584 | 13.9492 | -0.5666 |
| YRI | NPIP | 74849986 | 9.6951  | 15.2937 | -1.1218 |
| YRI | NPIP | 74854986 | 9.8226  | 18.6549 | -1.4632 |
| YRI | NPIP | 74859986 | 12.0717 | 21.8481 | -1.3909 |
| YRI | NPIP | 74864986 | 13.2109 | 22.6884 | -1.3    |
| YRI | NPIP | 74869986 | 17.8602 | 24.5371 | -0.8489 |
| YRI | NPIP | 74874986 | 37.7794 | 31.9318 | 0.5754  |
| YRI | NPIP | 74879986 | 40.3051 | 31.4276 | 0.8871  |
| YRI | NPIP | 74884986 | 33.4465 | 28.0664 | 0.6003  |
| CEU | PGA3 | 60708515 | 8.6547  | 6.9931  | 0.6952  |
| CEU | PGA3 | 60713515 | 7.3137  | 8.8692  | -0.5234 |
| CEU | PGA3 | 60718515 | 6.4123  | 9.2104  | -0.9092 |
| CEU | PGA3 | 60723515 | 6.2296  | 8.0164  | -0.66   |
| CEU | PGA3 | 60728515 | 6.2204  | 8.8692  | -0.8913 |



## 2\_TajimasD\_data

|     |      |          |         |         |         |
|-----|------|----------|---------|---------|---------|
| CEU | PGA3 | 60733515 | 5.61    | 8.187   | -0.9336 |
| CEU | PGA3 | 60738515 | 3.8901  | 6.4814  | -1.1615 |
| CEU | PGA3 | 60743515 | 6.2233  | 8.8692  | -0.8904 |
| CEU | PGA3 | 60748515 | 9.5696  | 11.0866 | -0.4147 |
| CEU | PGA3 | 60753515 | 13.3457 | 11.7688 | 0.4075  |
| CEU | PGA3 | 60758515 | 13.1787 | 11.4277 | 0.4652  |
| CEU | PGA3 | 60763515 | 12.0542 | 11.0866 | 0.2645  |
| CEU | PGA3 | 60768515 | 14.7895 | 12.9627 | 0.431   |
| CEU | PGA3 | 60773515 | 14.4477 | 13.1333 | 0.3063  |
| CEU | PGA3 | 60778515 | 13.0278 | 13.9861 | -0.2104 |
| CEU | PGA3 | 60783515 | 12.1119 | 12.9627 | -0.2007 |
| CEU | PGA3 | 60788515 | 12.0969 | 10.5749 | 0.4349  |
| CEU | PGA3 | 60793515 | 11.1121 | 10.916  | 0.0544  |
| CEU | PGA3 | 60798515 | 6.4714  | 8.3576  | -0.6705 |
| CEU | PGA3 | 60803515 | 4.8141  | 6.1402  | -0.624  |
| CEU | PGA3 | 60808515 | 7.2031  | 7.3342  | -0.0525 |
| CEU | PGA3 | 60813515 | 6.6496  | 7.3342  | -0.2743 |
| CEU | PGA3 | 60818515 | 6.4492  | 9.0398  | -0.8565 |
| CEU | PGA3 | 60823515 | 10.8167 | 11.7688 | -0.2461 |
| CEU | PGA3 | 60828515 | 13.2952 | 11.5982 | 0.4446  |
| CEU | PGA3 | 60833515 | 14.4234 | 12.6216 | 0.4359  |
| CEU | PGA3 | 60838515 | 9.3072  | 10.0632 | -0.2262 |
| CEU | PGA3 | 60843515 | 2.9691  | 4.7757  | -1.0625 |
| CEU | PGA3 | 60848515 | 2.6984  | 3.7524  | -0.7636 |
| CEU | PGA3 | 60853515 | 5.2736  | 6.3108  | -0.4762 |
| CEU | PGA3 | 60858515 | 13.5477 | 10.7454 | 0.7888  |
| CEU | PGA3 | 60863515 | 15.8369 | 11.5982 | 1.1106  |
| CEU | PGA3 | 60868515 | 12.711  | 10.7454 | 0.5533  |
| CEU | PGA3 | 60873515 | 9.1985  | 8.6987  | 0.1712  |
| CEU | PGA3 | 60878515 | 5.7572  | 6.4814  | -0.3246 |
| CEU | PGA3 | 60883515 | 4.7625  | 7.1636  | -0.9829 |
| CEU | PGA3 | 60888515 | 7.3964  | 8.5281  | -0.3949 |
| CEU | PGA3 | 60893515 | 11.1995 | 10.5749 | 0.1785  |
| CEU | PGA3 | 60898515 | 8.9097  | 9.0398  | -0.043  |
| CEU | PGA3 | 60903515 | 8.6582  | 7.5047  | 0.4526  |
| CEU | PGA3 | 60908515 | 19.2614 | 12.1099 | 1.7991  |
| CEU | PGA3 | 60913515 | 21.6197 | 13.1333 | 1.9774  |
| CEU | PGA3 | 60918515 | 17.0921 | 10.0632 | 2.1035  |
| CEU | PGA3 | 60923515 | 17.3045 | 10.0632 | 2.167   |
| CEU | PGA3 | 60928515 | 11.1031 | 9.0398  | 0.6822  |
| CEU | PGA3 | 60933515 | 6.2853  | 6.3108  | -0.0117 |
| CEU | PGA3 | 60938515 | 6.3754  | 4.9463  | 0.815   |
| CEU | PGA3 | 60943515 | 6.2614  | 4.9463  | 0.75    |
| CEU | PGA3 | 60948515 | 8.1093  | 5.7991  | 1.1442  |
| CEU | PGA3 | 60953515 | 8.9355  | 6.6519  | 0.9998  |
| CEU | PGA3 | 60958515 | 6.9621  | 6.4814  | 0.2155  |
| CEU | PGA3 | 60963515 | 6.8273  | 5.7991  | 0.5093  |
| CEU | PGA3 | 60968515 | 12.1507 | 7.8459  | 1.6217  |
| CEU | PGA3 | 60973515 | 8.8182  | 5.458   | 1.7566  |

## 2\_TajimasD\_data

|     |      |          |        |         |         |
|-----|------|----------|--------|---------|---------|
| CEU | PGA3 | 60978515 | 1.4174 | 1.3645  | 0.0856  |
| CEU | PGA3 | 60983515 | 0.9099 | 1.0234  | -0.2255 |
| CEU | PGA3 | 60988515 | 0      | 0       | 0       |
| CEU | PGA3 | 60993515 | 0.2035 | 0.5117  | -0.9666 |
| CEU | PGA3 | 60998515 | 0.7062 | 0.8528  | -0.3301 |
| CEU | PGA3 | 61003515 | 0.5634 | 1.0234  | -0.914  |
| CEU | PGA3 | 61008515 | 0.1099 | 0.8528  | -1.673  |
| CEU | PGA3 | 61013515 | 2.8598 | 7.1636  | -1.7618 |
| CEU | PGA3 | 61018515 | 3.604  | 10.0632 | -1.933  |
| CEU | PGA3 | 61023515 | 1.169  | 6.1402  | -2.3393 |
| CEU | PGA3 | 61028515 | 0.556  | 4.9463  | -2.5038 |
| CEU | PGA3 | 61033515 | 0.5993 | 4.0935  | -2.3496 |
| CEU | PGA3 | 61038515 | 0.7596 | 6.1402  | -2.532  |
| CEU | PGA3 | 61043515 | 1.1497 | 7.1636  | -2.4618 |
| CEU | PGA3 | 61048515 | 1.3603 | 5.6286  | -2.1711 |
| CEU | PGA3 | 61053515 | 0.8532 | 6.1402  | -2.4879 |
| CEU | PGA3 | 61058515 | 0.913  | 6.3108  | -2.4782 |
| CEU | PGA3 | 61063515 | 0.907  | 4.0935  | -2.1427 |
| CEU | PGA3 | 61068515 | 0.6419 | 2.8996  | -2.0304 |
| CEU | PGA3 | 61073515 | 0.8118 | 3.9229  | -2.1699 |
| CEU | PGA3 | 61078515 | 1.0542 | 4.7757  | -2.1888 |
| CEU | PGA3 | 61083515 | 1.2686 | 5.1169  | -2.1301 |
| CEU | PGA3 | 61088515 | 1.4222 | 6.1402  | -2.2202 |
| CEU | PGA3 | 61093515 | 1.0717 | 6.3108  | -2.4054 |
| CEU | PGA3 | 61098515 | 0.7565 | 6.3108  | -2.5501 |
| CEU | PGA3 | 61103515 | 2.1647 | 7.8459  | -2.1402 |
| CEU | PGA3 | 61108515 | 2.3956 | 7.5047  | -2.0046 |
| CEU | PGA3 | 61113515 | 1.0278 | 6.8225  | -2.4795 |
| CEU | PGA3 | 61118515 | 0.5799 | 5.9697  | -2.6012 |
| CEU | PGA3 | 61123515 | 0.5479 | 4.4346  | -2.4386 |
| CEU | PGA3 | 61128515 | 0.6836 | 4.4346  | -2.3535 |
| CEU | PGA3 | 61133515 | 0.832  | 4.2641  | -2.2279 |
| CEU | PGA3 | 61138515 | 0.7745 | 5.6286  | -2.4691 |
| CEU | PGA3 | 61143515 | 1.2907 | 6.8225  | -2.367  |
| CEU | PGA3 | 61148515 | 1.5083 | 6.1402  | -2.1796 |
| CEU | PGA3 | 61153515 | 1.3651 | 5.1169  | -2.0767 |
| CEU | PGA3 | 61158515 | 2.357  | 5.1169  | -1.5277 |
| CEU | PGA3 | 61163515 | 3.2581 | 6.6519  | -1.4859 |
| CEU | PGA3 | 61168515 | 2.5624 | 5.6286  | -1.5597 |
| CEU | PGA3 | 61173515 | 1.576  | 3.7524  | -1.5768 |
| CEU | PGA3 | 61178515 | 2.5925 | 5.2874  | -1.4491 |
| CEU | PGA3 | 61183515 | 2.4865 | 5.458   | -1.5534 |
| CEU | PGA3 | 61188515 | 1.6329 | 4.2641  | -1.708  |
| CEU | PGA3 | 61193515 | 3.242  | 6.9931  | -1.5695 |
| CEU | PGA3 | 61198515 | 4.5675 | 8.6987  | -1.4153 |
| CEU | PGA3 | 61203515 | 4.3364 | 6.1402  | -0.8488 |
| CEU | PGA3 | 61208515 | 3.8656 | 6.4814  | -1.1724 |
| CEU | PGA3 | 61213515 | 3.4649 | 7.5047  | -1.585  |
| CEU | PGA3 | 61218515 | 3.6817 | 7.1636  | -1.4253 |

## 2\_TajimasD\_data

|     |      |          |         |         |         |
|-----|------|----------|---------|---------|---------|
| CEU | PGA3 | 61223515 | 3.424   | 6.1402  | -1.2782 |
| CEU | PGA3 | 61228515 | 3.1227  | 5.7991  | -1.3256 |
| CEU | PGA3 | 61233515 | 2.9538  | 6.3108  | -1.5413 |
| CEU | PGA3 | 61238515 | 2.254   | 6.4814  | -1.8948 |
| CEU | PGA3 | 61243515 | 2.3296  | 5.9697  | -1.7568 |
| CEU | PGA3 | 61248515 | 2.6559  | 4.9463  | -1.3062 |
| CEU | PGA3 | 61253515 | 3.8266  | 7.8459  | -1.5141 |
| CEU | PGA3 | 61258515 | 6.665   | 11.2571 | -1.2374 |
| CEU | PGA3 | 61263515 | 9.4203  | 15.0095 | -1.1473 |
| CEU | PGA3 | 61268515 | 9.0771  | 14.1567 | -1.1023 |
| CEU | PGA3 | 61273515 | 7.3562  | 10.5749 | -0.9196 |
| CEU | PGA3 | 61278515 | 8.6852  | 9.7221  | -0.3204 |
| CEU | PGA3 | 61283515 | 5.867   | 7.8459  | -0.7455 |
| CEU | PGA3 | 61288515 | 1.6858  | 6.9931  | -2.2207 |
| CEU | PGA3 | 61293515 | 1.2925  | 4.9463  | -2.0838 |
| CEU | PGA3 | 61298515 | 0.9134  | 4.2641  | -2.1751 |
| CEU | PGA3 | 61303515 | 1.692   | 5.6286  | -2.0024 |
| CEU | PGA3 | 61308515 | 1.1754  | 3.7524  | -1.867  |
| CEU | PGA3 | 61313515 | 1.021   | 3.5818  | -1.9301 |
| CEU | PGA3 | 61318515 | 1.7862  | 6.8225  | -2.155  |
| CEU | PGA3 | 61323515 | 1.7314  | 7.3342  | -2.2449 |
| CEU | PGA3 | 61328515 | 1.4152  | 6.4814  | -2.2707 |
| CEU | PGA3 | 61333515 | 1.2255  | 5.9697  | -2.2896 |
| CEU | PGA3 | 61338515 | 1.236   | 5.7991  | -2.2601 |
| CEU | PGA3 | 61343515 | 0.9046  | 4.6052  | -2.2468 |
| CEU | PGA3 | 61348515 | 1.4537  | 4.7757  | -1.9538 |
| CEU | PGA3 | 61353515 | 1.9528  | 5.6286  | -1.8697 |
| CEU | PGA3 | 61358515 | 1.5615  | 4.9463  | -1.9303 |
| CEU | PGA3 | 61363515 | 1.1422  | 3.7524  | -1.891  |
| CEU | PGA3 | 61368515 | 1.3593  | 4.9463  | -2.0457 |
| CEU | PGA3 | 61373515 | 2.032   | 5.7991  | -1.8658 |
| CEU | PGA3 | 61378515 | 3.4587  | 4.2641  | -0.5228 |
| CEU | PGA3 | 61383515 | 3.9992  | 5.6286  | -0.8288 |
| CEU | PGA3 | 61388515 | 4.2892  | 7.1636  | -1.1766 |
| CEU | PGA3 | 61393515 | 4.535   | 7.5047  | -1.1652 |
| CEU | PGA3 | 61398515 | 5.9294  | 8.0164  | -0.7708 |
| CEU | PGA3 | 61403515 | 8.4595  | 8.5281  | -0.0239 |
| CEU | PGA3 | 61408515 | 9.7262  | 8.6987  | 0.352   |
| CEU | PGA3 | 61413515 | 8.0625  | 6.9931  | 0.4475  |
| CEU | PGA3 | 61418515 | 6.0625  | 5.458   | 0.316   |
| CEU | PGA3 | 61423515 | 6.522   | 6.8225  | -0.1286 |
| CEU | PGA3 | 61428515 | 7.2863  | 7.5047  | -0.0857 |
| CEU | PGA3 | 61433515 | 7.9285  | 7.1636  | 0.3131  |
| CEU | PGA3 | 61438515 | 10.8501 | 8.0164  | 1.0466  |
| CEU | PGA3 | 61443515 | 10.3649 | 8.6987  | 0.5708  |
| CEU | PGA3 | 61448515 | 6.3542  | 7.6753  | -0.5078 |
| CEU | PGA3 | 61453515 | 5.2826  | 7.1636  | -0.77   |
| CEU | PGA3 | 61458515 | 5.76    | 6.8225  | -0.4546 |
| CEU | PGA3 | 61463515 | 6.8235  | 6.8225  | 0.0004  |

## 2\_TajimasD\_data

|     |      |          |         |         |         |
|-----|------|----------|---------|---------|---------|
| CEU | PGA3 | 61468515 | 5.3364  | 7.8459  | -0.9454 |
| CEU | PGA3 | 61473515 | 3.388   | 5.6286  | -1.1397 |
| CEU | PGA3 | 61478515 | 6.1437  | 5.2874  | 0.4604  |
| CEU | PGA3 | 61483515 | 7.3148  | 6.3108  | 0.461   |
| CEU | PGA3 | 61488515 | 5.9615  | 5.6286  | 0.1693  |
| CEU | PGA3 | 61493515 | 5.7186  | 5.7991  | -0.0399 |
| CEU | PGA3 | 61498515 | 5.3906  | 6.1402  | -0.3527 |
| CEU | PGA3 | 61503515 | 8.2377  | 7.3342  | 0.362   |
| CEU | PGA3 | 61508515 | 8.3818  | 6.8225  | 0.6672  |
| CEU | PGA3 | 61513515 | 8.1435  | 7.5047  | 0.2506  |
| CEU | PGA3 | 61518515 | 9.892   | 7.5047  | 0.9367  |
| CEU | PGA3 | 61523515 | 10.9336 | 6.4814  | 1.9955  |
| CEU | PGA3 | 61528515 | 9.6467  | 8.5281  | 0.3903  |
| CEU | PGA3 | 61533515 | 8.4603  | 8.0164  | 0.164   |
| CEU | PGA3 | 61538515 | 7.1482  | 5.7991  | 0.6682  |
| CEU | PGA3 | 61543515 | 4.2711  | 4.9463  | -0.3851 |
| CEU | PGA3 | 61548515 | 5.3931  | 5.1169  | 0.1529  |
| CEU | PGA3 | 61553515 | 5.1159  | 4.9463  | 0.0967  |
| CEU | PGA3 | 61558515 | 2.5898  | 4.0935  | -1.0111 |
| CEU | PGA3 | 61563515 | 2.4137  | 3.5818  | -0.8804 |
| CEU | PGA3 | 61568515 | 4.1901  | 3.4112  | 0.6118  |
| CEU | PGA3 | 61573515 | 4.1608  | 3.9229  | 0.1659  |
| CEU | PGA3 | 61578515 | 5.4762  | 5.6286  | -0.0775 |
| CEU | PGA3 | 61583515 | 5.7345  | 5.6286  | 0.0539  |
| CEU | PGA3 | 61588515 | 3.8971  | 4.4346  | -0.3372 |
| CEU | PGA3 | 61593515 | 5.5349  | 4.9463  | 0.3357  |
| CEU | PGA3 | 61598515 | 7.4354  | 6.3108  | 0.5163  |
| CEU | PGA3 | 61603515 | 7.7285  | 6.9931  | 0.3077  |
| CEU | PGA3 | 61608515 | 6.3852  | 7.1636  | -0.3186 |
| CEU | PGA3 | 61613515 | 6.823   | 8.0164  | -0.4408 |
| CEU | PGA3 | 61618515 | 9.6236  | 9.0398  | 0.193   |
| CEU | PGA3 | 61623515 | 13.9765 | 10.0632 | 1.1711  |
| CEU | PGA3 | 61628515 | 14.7194 | 10.2337 | 1.3215  |
| CEU | PGA3 | 61633515 | 12.2156 | 11.0866 | 0.3086  |
| CEU | PGA3 | 61638515 | 9.6966  | 10.0632 | -0.1097 |
| CEU | PGA3 | 61643515 | 5.7504  | 6.1402  | -0.1834 |
| CEU | PGA3 | 61648515 | 2.8864  | 3.9229  | -0.7229 |
| CEU | PGA3 | 61653515 | 7.2492  | 6.3108  | 0.4308  |
| CEU | PGA3 | 61658515 | 8.999   | 8.187   | 0.2942  |
| CEU | PGA3 | 61663515 | 4.7411  | 5.6286  | -0.4514 |
| CEU | PGA3 | 61668515 | 5.9406  | 5.458   | 0.2523  |
| CEU | PGA3 | 61673515 | 5.9427  | 6.6519  | -0.3105 |
| CEU | PGA3 | 61678515 | 4.2292  | 5.2874  | -0.569  |
| CEU | PGA3 | 61683515 | 6.6526  | 7.5047  | -0.3343 |
| CEU | PGA3 | 61688515 | 10.0967 | 10.2337 | -0.0404 |
| CEU | PGA3 | 61693515 | 12.384  | 10.5749 | 0.5169  |
| CEU | PGA3 | 61698515 | 12.4712 | 10.0632 | 0.7206  |
| CEU | PGA3 | 61703515 | 11.0429 | 8.5281  | 0.8774  |
| CHB | PGA3 | 60708515 | 7.3103  | 10.3343 | -0.8802 |

## 2\_TajimasD\_data

|     |      |          |         |         |         |
|-----|------|----------|---------|---------|---------|
| CHB | PGA3 | 60713515 | 5.514   | 9.6567  | -1.2846 |
| CHB | PGA3 | 60718515 | 4.8034  | 8.8096  | -1.3526 |
| CHB | PGA3 | 60723515 | 4.6998  | 9.9955  | -1.5902 |
| CHB | PGA3 | 60728515 | 2.7569  | 9.1484  | -2.0839 |
| CHB | PGA3 | 60733515 | 2.003   | 7.1154  | -2.0995 |
| CHB | PGA3 | 60738515 | 1.6309  | 7.1154  | -2.2523 |
| CHB | PGA3 | 60743515 | 2.3384  | 9.1484  | -2.2203 |
| CHB | PGA3 | 60748515 | 4.1775  | 10.6731 | -1.8346 |
| CHB | PGA3 | 60753515 | 7.2671  | 11.1814 | -1.0584 |
| CHB | PGA3 | 60758515 | 8.6551  | 11.012  | -0.6465 |
| CHB | PGA3 | 60763515 | 9.9743  | 12.0285 | -0.5186 |
| CHB | PGA3 | 60768515 | 11.8722 | 12.7061 | -0.1999 |
| CHB | PGA3 | 60773515 | 9.8946  | 10.6731 | -0.2199 |
| CHB | PGA3 | 60778515 | 8.8633  | 11.3508 | -0.6632 |
| CHB | PGA3 | 60783515 | 7.9376  | 10.6731 | -0.7726 |
| CHB | PGA3 | 60788515 | 6.9623  | 7.1154  | -0.0629 |
| CHB | PGA3 | 60793515 | 10.1144 | 9.9955  | 0.0357  |
| CHB | PGA3 | 60798515 | 8.4424  | 10.1649 | -0.5092 |
| CHB | PGA3 | 60803515 | 4.8184  | 7.1154  | -0.9433 |
| CHB | PGA3 | 60808515 | 5.807   | 7.6237  | -0.7006 |
| CHB | PGA3 | 60813515 | 4.8513  | 7.6237  | -1.0691 |
| CHB | PGA3 | 60818515 | 3.7639  | 6.946   | -1.3357 |
| CHB | PGA3 | 60823515 | 7.8637  | 8.979   | -0.37   |
| CHB | PGA3 | 60828515 | 9.687   | 11.012  | -0.3634 |
| CHB | PGA3 | 60833515 | 9.4394  | 12.5367 | -0.752  |
| CHB | PGA3 | 60838515 | 7.434   | 11.012  | -0.9814 |
| CHB | PGA3 | 60843515 | 3.9397  | 7.6237  | -1.4207 |
| CHB | PGA3 | 60848515 | 2.9461  | 7.2848  | -1.744  |
| CHB | PGA3 | 60853515 | 3.6895  | 8.979   | -1.7547 |
| CHB | PGA3 | 60858515 | 5.997   | 10.8426 | -1.3486 |
| CHB | PGA3 | 60863515 | 7.0544  | 10.1649 | -0.9195 |
| CHB | PGA3 | 60868515 | 7.2998  | 11.1814 | -1.0495 |
| CHB | PGA3 | 60873515 | 4.5188  | 9.6567  | -1.5932 |
| CHB | PGA3 | 60878515 | 2.225   | 6.7766  | -1.9538 |
| CHB | PGA3 | 60883515 | 2.1464  | 6.7766  | -1.9876 |
| CHB | PGA3 | 60888515 | 1.6503  | 8.979   | -2.4312 |
| CHB | PGA3 | 60893515 | 1.5458  | 10.5037 | -2.5682 |
| CHB | PGA3 | 60898515 | 1.1915  | 8.4708  | -2.5483 |
| CHB | PGA3 | 60903515 | 1.3192  | 7.4543  | -2.4149 |
| CHB | PGA3 | 60908515 | 2.4097  | 12.7061 | -2.4683 |
| CHB | PGA3 | 60913515 | 2.4877  | 14.2309 | -2.5285 |
| CHB | PGA3 | 60918515 | 1.7729  | 11.012  | -2.5342 |
| CHB | PGA3 | 60923515 | 1.6134  | 11.5202 | -2.6047 |
| CHB | PGA3 | 60928515 | 1.0464  | 7.6237  | -2.5364 |
| CHB | PGA3 | 60933515 | 0.8416  | 5.4213  | -2.4015 |
| CHB | PGA3 | 60938515 | 1.0272  | 6.946   | -2.4845 |
| CHB | PGA3 | 60943515 | 1.4408  | 7.4543  | -2.3671 |
| CHB | PGA3 | 60948515 | 1.757   | 7.9625  | -2.2996 |
| CHB | PGA3 | 60953515 | 1.4771  | 8.3013  | -2.4338 |

## 2\_TajimasD\_data

|     |      |          |        |         |         |
|-----|------|----------|--------|---------|---------|
| CHB | PGA3 | 60958515 | 1.4186 | 8.3013  | -2.4547 |
| CHB | PGA3 | 60963515 | 1.2132 | 8.6402  | -2.5529 |
| CHB | PGA3 | 60968515 | 3.5473 | 10.5037 | -1.9944 |
| CHB | PGA3 | 60973515 | 3.2199 | 5.9295  | -1.3118 |
| CHB | PGA3 | 60978515 | 0.2699 | 1.0165  | -1.4858 |
| CHB | PGA3 | 60983515 | 0.1057 | 1.1859  | -1.9281 |
| CHB | PGA3 | 60988515 | 0.0194 | 0.3388  | -1.2812 |
| CHB | PGA3 | 60993515 | 0.261  | 1.0165  | -1.5035 |
| CHB | PGA3 | 60998515 | 0.7651 | 1.1859  | -0.7511 |
| CHB | PGA3 | 61003515 | 0.533  | 0.5082  | 0.0779  |
| CHB | PGA3 | 61008515 | 0.2829 | 0.6777  | -1.0321 |
| CHB | PGA3 | 61013515 | 3.0699 | 10.5037 | -2.1312 |
| CHB | PGA3 | 61018515 | 3.9265 | 13.5532 | -2.171  |
| CHB | PGA3 | 61023515 | 1.4437 | 5.5907  | -2.1159 |
| CHB | PGA3 | 61028515 | 0.909  | 4.913   | -2.2903 |
| CHB | PGA3 | 61033515 | 1.0815 | 5.4213  | -2.2757 |
| CHB | PGA3 | 61038515 | 1.1692 | 6.6072  | -2.3884 |
| CHB | PGA3 | 61043515 | 1.5262 | 8.4708  | -2.4311 |
| CHB | PGA3 | 61048515 | 1.1298 | 6.6072  | -2.4057 |
| CHB | PGA3 | 61053515 | 0.8454 | 6.0989  | -2.4799 |
| CHB | PGA3 | 61058515 | 1.2309 | 7.6237  | -2.4652 |
| CHB | PGA3 | 61063515 | 1.4639 | 6.4378  | -2.2364 |
| CHB | PGA3 | 61068515 | 1.2096 | 5.2519  | -2.1801 |
| CHB | PGA3 | 61073515 | 0.9924 | 5.4213  | -2.3224 |
| CHB | PGA3 | 61078515 | 1.2865 | 7.1154  | -2.3938 |
| CHB | PGA3 | 61083515 | 1.8528 | 8.979   | -2.364  |
| CHB | PGA3 | 61088515 | 1.8814 | 7.4543  | -2.1936 |
| CHB | PGA3 | 61093515 | 1.7196 | 7.6237  | -2.2768 |
| CHB | PGA3 | 61098515 | 1.4799 | 7.6237  | -2.3692 |
| CHB | PGA3 | 61103515 | 1.6794 | 7.6237  | -2.2923 |
| CHB | PGA3 | 61108515 | 2.0761 | 7.6237  | -2.1393 |
| CHB | PGA3 | 61113515 | 1.732  | 5.2519  | -1.8984 |
| CHB | PGA3 | 61118515 | 1.5517 | 6.4378  | -2.197  |
| CHB | PGA3 | 61123515 | 1.0603 | 6.946   | -2.4706 |
| CHB | PGA3 | 61128515 | 0.6223 | 5.7601  | -2.5526 |
| CHB | PGA3 | 61133515 | 0.5681 | 6.2684  | -2.6254 |
| CHB | PGA3 | 61138515 | 1.2109 | 7.1154  | -2.4248 |
| CHB | PGA3 | 61143515 | 2.0668 | 5.9295  | -1.87   |
| CHB | PGA3 | 61148515 | 1.5351 | 5.5907  | -2.0693 |
| CHB | PGA3 | 61153515 | 0.9725 | 5.4213  | -2.3328 |
| CHB | PGA3 | 61158515 | 1.3108 | 5.2519  | -2.1256 |
| CHB | PGA3 | 61163515 | 1.5989 | 7.4543  | -2.3048 |
| CHB | PGA3 | 61168515 | 1.3215 | 7.6237  | -2.4303 |
| CHB | PGA3 | 61173515 | 0.9869 | 5.5907  | -2.349  |
| CHB | PGA3 | 61178515 | 1.2732 | 4.913   | -2.082  |
| CHB | PGA3 | 61183515 | 1.0769 | 4.7436  | -2.1629 |
| CHB | PGA3 | 61188515 | 0.9985 | 4.913   | -2.2391 |
| CHB | PGA3 | 61193515 | 1.8051 | 6.7766  | -2.1341 |
| CHB | PGA3 | 61198515 | 2.1839 | 9.1484  | -2.2707 |

## 2\_TajimasD\_data

|     |      |          |        |         |         |
|-----|------|----------|--------|---------|---------|
| CHB | PGA3 | 61203515 | 2.0751 | 8.6402  | -2.2567 |
| CHB | PGA3 | 61208515 | 1.9161 | 6.946   | -2.1114 |
| CHB | PGA3 | 61213515 | 1.6457 | 7.1154  | -2.2462 |
| CHB | PGA3 | 61218515 | 1.596  | 7.9625  | -2.3592 |
| CHB | PGA3 | 61223515 | 2.3415 | 7.7931  | -2.0604 |
| CHB | PGA3 | 61228515 | 2.4422 | 7.1154  | -1.9191 |
| CHB | PGA3 | 61233515 | 1.3775 | 6.2684  | -2.2526 |
| CHB | PGA3 | 61238515 | 1.1213 | 6.946   | -2.445  |
| CHB | PGA3 | 61243515 | 1.1392 | 7.1154  | -2.4542 |
| CHB | PGA3 | 61248515 | 1.2128 | 8.1319  | -2.5149 |
| CHB | PGA3 | 61253515 | 1.5989 | 10.8426 | -2.5726 |
| CHB | PGA3 | 61258515 | 2.5311 | 12.1979 | -2.4084 |
| CHB | PGA3 | 61263515 | 3.4384 | 14.2309 | -2.3238 |
| CHB | PGA3 | 61268515 | 4.7657 | 12.1979 | -1.8517 |
| CHB | PGA3 | 61273515 | 6.21   | 9.3178  | -0.9962 |
| CHB | PGA3 | 61278515 | 9.0872 | 9.3178  | -0.0739 |
| CHB | PGA3 | 61283515 | 6.7093 | 7.7931  | -0.4096 |
| CHB | PGA3 | 61288515 | 1.7805 | 8.1319  | -2.3086 |
| CHB | PGA3 | 61293515 | 1.3946 | 7.4543  | -2.3853 |
| CHB | PGA3 | 61298515 | 0.7967 | 6.4378  | -2.5364 |
| CHB | PGA3 | 61303515 | 2.325  | 7.6237  | -2.0433 |
| CHB | PGA3 | 61308515 | 2.1513 | 6.2684  | -1.8962 |
| CHB | PGA3 | 61313515 | 1.3181 | 5.0825  | -2.0899 |
| CHB | PGA3 | 61318515 | 1.3953 | 5.7601  | -2.1685 |
| CHB | PGA3 | 61323515 | 2.0366 | 6.7766  | -2.0347 |
| CHB | PGA3 | 61328515 | 2.2545 | 6.2684  | -1.8487 |
| CHB | PGA3 | 61333515 | 0.9487 | 6.6072  | -2.4853 |
| CHB | PGA3 | 61338515 | 1.2363 | 8.6402  | -2.545  |
| CHB | PGA3 | 61343515 | 1.1133 | 7.2848  | -2.4807 |
| CHB | PGA3 | 61348515 | 1.1275 | 6.4378  | -2.3877 |
| CHB | PGA3 | 61353515 | 1.822  | 7.1154  | -2.1738 |
| CHB | PGA3 | 61358515 | 1.4843 | 6.6072  | -2.25   |
| CHB | PGA3 | 61363515 | 0.7215 | 5.4213  | -2.4644 |
| CHB | PGA3 | 61368515 | 1.2024 | 5.2519  | -2.184  |
| CHB | PGA3 | 61373515 | 1.4232 | 7.1154  | -2.3376 |
| CHB | PGA3 | 61378515 | 1.853  | 7.4543  | -2.2048 |
| CHB | PGA3 | 61383515 | 2.3059 | 5.7601  | -1.7161 |
| CHB | PGA3 | 61388515 | 3.9191 | 8.3013  | -1.5629 |
| CHB | PGA3 | 61393515 | 4.6806 | 10.3343 | -1.6457 |
| CHB | PGA3 | 61398515 | 3.9756 | 9.3178  | -1.7124 |
| CHB | PGA3 | 61403515 | 3.5926 | 8.979   | -1.7868 |
| CHB | PGA3 | 61408515 | 3.301  | 8.6402  | -1.8353 |
| CHB | PGA3 | 61413515 | 2.6918 | 7.1154  | -1.8166 |
| CHB | PGA3 | 61418515 | 1.7984 | 5.4213  | -1.8997 |
| CHB | PGA3 | 61423515 | 1.8896 | 5.7601  | -1.923  |
| CHB | PGA3 | 61428515 | 2.5191 | 7.1154  | -1.8876 |
| CHB | PGA3 | 61433515 | 4.3781 | 8.1319  | -1.3644 |
| CHB | PGA3 | 61438515 | 8.8715 | 8.6402  | 0.0795  |
| CHB | PGA3 | 61443515 | 9.5123 | 8.8096  | 0.2373  |

## 2\_TajimasD\_data

|     |      |          |         |         |         |
|-----|------|----------|---------|---------|---------|
| CHB | PGA3 | 61448515 | 6.9341  | 6.946   | -0.005  |
| CHB | PGA3 | 61453515 | 6.7331  | 6.0989  | 0.2994  |
| CHB | PGA3 | 61458515 | 5.8496  | 6.4378  | -0.2645 |
| CHB | PGA3 | 61463515 | 5.7687  | 6.0989  | -0.1559 |
| CHB | PGA3 | 61468515 | 4.6958  | 6.946   | -0.9445 |
| CHB | PGA3 | 61473515 | 3.3455  | 6.6072  | -1.4326 |
| CHB | PGA3 | 61478515 | 5.6497  | 6.7766  | -0.4837 |
| CHB | PGA3 | 61483515 | 6.5997  | 7.4543  | -0.3364 |
| CHB | PGA3 | 61488515 | 5.9271  | 7.1154  | -0.488  |
| CHB | PGA3 | 61493515 | 6.044   | 6.6072  | -0.2474 |
| CHB | PGA3 | 61498515 | 5.2859  | 6.2684  | -0.4525 |
| CHB | PGA3 | 61503515 | 6.616   | 7.6237  | -0.3886 |
| CHB | PGA3 | 61508515 | 6.7099  | 7.6237  | -0.3524 |
| CHB | PGA3 | 61513515 | 6.5089  | 7.6237  | -0.4299 |
| CHB | PGA3 | 61518515 | 8.5035  | 7.4543  | 0.413   |
| CHB | PGA3 | 61523515 | 10.3998 | 8.4708  | 0.6753  |
| CHB | PGA3 | 61528515 | 8.676   | 8.8096  | -0.0451 |
| CHB | PGA3 | 61533515 | 4.2526  | 6.2684  | -0.9284 |
| CHB | PGA3 | 61538515 | 3.0628  | 6.2684  | -1.4764 |
| CHB | PGA3 | 61543515 | 3.1719  | 5.9295  | -1.335  |
| CHB | PGA3 | 61548515 | 4.2833  | 4.5742  | -0.1771 |
| CHB | PGA3 | 61553515 | 3.8422  | 3.8965  | -0.038  |
| CHB | PGA3 | 61558515 | 1.6659  | 3.0495  | -1.1899 |
| CHB | PGA3 | 61563515 | 2.114   | 3.3883  | -1.0035 |
| CHB | PGA3 | 61568515 | 4.3246  | 4.066   | 0.1744  |
| CHB | PGA3 | 61573515 | 4.2193  | 4.4048  | -0.1167 |
| CHB | PGA3 | 61578515 | 6.0255  | 4.7436  | 0.7562  |
| CHB | PGA3 | 61583515 | 6.071   | 4.2354  | 1.195   |
| CHB | PGA3 | 61588515 | 3.9751  | 4.2354  | -0.1695 |
| CHB | PGA3 | 61593515 | 5.7658  | 4.913   | 0.4878  |
| CHB | PGA3 | 61598515 | 7.612   | 5.7601  | 0.9201  |
| CHB | PGA3 | 61603515 | 7.8348  | 6.6072  | 0.5392  |
| CHB | PGA3 | 61608515 | 5.7228  | 6.946   | -0.5135 |
| CHB | PGA3 | 61613515 | 5.2126  | 9.3178  | -1.3159 |
| CHB | PGA3 | 61618515 | 7.7093  | 10.5037 | -0.8011 |
| CHB | PGA3 | 61623515 | 10.2444 | 9.9955  | 0.0747  |
| CHB | PGA3 | 61628515 | 10.9282 | 13.5532 | -0.592  |
| CHB | PGA3 | 61633515 | 8.1841  | 14.5697 | -1.3445 |
| CHB | PGA3 | 61638515 | 5.4186  | 11.012  | -1.5342 |
| CHB | PGA3 | 61643515 | 4.514   | 7.9625  | -1.2779 |
| CHB | PGA3 | 61648515 | 3.0308  | 6.6072  | -1.5708 |
| CHB | PGA3 | 61653515 | 8.3548  | 8.979   | -0.2071 |
| CHB | PGA3 | 61658515 | 9.9079  | 10.1649 | -0.076  |
| CHB | PGA3 | 61663515 | 4.3986  | 8.3013  | -1.3919 |
| CHB | PGA3 | 61668515 | 4.186   | 8.4708  | -1.5    |
| CHB | PGA3 | 61673515 | 2.8264  | 7.4543  | -1.8217 |
| CHB | PGA3 | 61678515 | 2.1639  | 5.5907  | -1.7484 |
| CHB | PGA3 | 61683515 | 4.3179  | 7.9625  | -1.3506 |
| CHB | PGA3 | 61688515 | 5.9472  | 10.8426 | -1.3624 |



## 2\_TajimasD\_data

|     |      |          |         |         |         |
|-----|------|----------|---------|---------|---------|
| CHB | PGA3 | 61693515 | 7.3791  | 11.1814 | -1.0281 |
| CHB | PGA3 | 61698515 | 8.7251  | 9.6567  | -0.2889 |
| CHB | PGA3 | 61703515 | 9.9732  | 9.9955  | -0.0067 |
| YRI | PGA3 | 60708515 | 11.756  | 12.1005 | -0.0862 |
| YRI | PGA3 | 60713515 | 10.522  | 13.1089 | -0.6001 |
| YRI | PGA3 | 60718515 | 10.3185 | 14.6214 | -0.8999 |
| YRI | PGA3 | 60723515 | 10.1462 | 13.1089 | -0.6872 |
| YRI | PGA3 | 60728515 | 9.47    | 10.924  | -0.4005 |
| YRI | PGA3 | 60733515 | 7.8566  | 9.5795  | -0.5364 |
| YRI | PGA3 | 60738515 | 5.9684  | 10.4199 | -1.2814 |
| YRI | PGA3 | 60743515 | 7.037   | 12.7727 | -1.3636 |
| YRI | PGA3 | 60748515 | 10.6345 | 14.4534 | -0.8075 |
| YRI | PGA3 | 60753515 | 13.4532 | 15.2937 | -0.3688 |
| YRI | PGA3 | 60758515 | 11.993  | 16.302  | -0.8123 |
| YRI | PGA3 | 60763515 | 11.2693 | 14.4534 | -0.6733 |
| YRI | PGA3 | 60768515 | 13.9426 | 13.9492 | -0.0014 |
| YRI | PGA3 | 60773515 | 11.5141 | 14.4534 | -0.6215 |
| YRI | PGA3 | 60778515 | 10.7075 | 14.1172 | -0.7373 |
| YRI | PGA3 | 60783515 | 13.151  | 14.2853 | -0.2425 |
| YRI | PGA3 | 60788515 | 11.5345 | 11.7644 | -0.0591 |
| YRI | PGA3 | 60793515 | 14.1742 | 14.1172 | 0.0123  |
| YRI | PGA3 | 60798515 | 11.1631 | 13.7811 | -0.5792 |
| YRI | PGA3 | 60803515 | 6.8372  | 11.4282 | -1.212  |
| YRI | PGA3 | 60808515 | 9.3601  | 13.1089 | -0.8696 |
| YRI | PGA3 | 60813515 | 8.2607  | 12.9408 | -1.099  |
| YRI | PGA3 | 60818515 | 6.8087  | 12.7727 | -1.4179 |
| YRI | PGA3 | 60823515 | 11.3249 | 17.1423 | -1.0452 |
| YRI | PGA3 | 60828515 | 16.3203 | 19.4952 | -0.5042 |
| YRI | PGA3 | 60833515 | 17.5343 | 17.9827 | -0.077  |
| YRI | PGA3 | 60838515 | 14.5307 | 15.2937 | -0.1529 |
| YRI | PGA3 | 60843515 | 10.8137 | 13.1089 | -0.5324 |
| YRI | PGA3 | 60848515 | 9.3525  | 11.7644 | -0.6196 |
| YRI | PGA3 | 60853515 | 12.0952 | 12.1005 | -0.0013 |
| YRI | PGA3 | 60858515 | 17.0274 | 14.7895 | 0.463   |
| YRI | PGA3 | 60863515 | 17.6577 | 15.9659 | 0.3254  |
| YRI | PGA3 | 60868515 | 17.5191 | 17.1423 | 0.0677  |
| YRI | PGA3 | 60873515 | 13.9897 | 14.2853 | -0.0632 |
| YRI | PGA3 | 60878515 | 9.931   | 10.924  | -0.2735 |
| YRI | PGA3 | 60883515 | 10.0185 | 10.756  | -0.2061 |
| YRI | PGA3 | 60888515 | 12.544  | 13.445  | -0.2041 |
| YRI | PGA3 | 60893515 | 13.2059 | 15.2937 | -0.4183 |
| YRI | PGA3 | 60898515 | 9.3751  | 12.4366 | -0.7464 |
| YRI | PGA3 | 60903515 | 9.7182  | 12.6047 | -0.6949 |
| YRI | PGA3 | 60908515 | 16.4966 | 17.3104 | -0.1449 |
| YRI | PGA3 | 60913515 | 14.121  | 16.8062 | -0.4917 |
| YRI | PGA3 | 60918515 | 9.5646  | 13.445  | -0.8788 |
| YRI | PGA3 | 60923515 | 11.1499 | 13.1089 | -0.4544 |
| YRI | PGA3 | 60928515 | 7.6058  | 12.9408 | -1.2527 |
| YRI | PGA3 | 60933515 | 5.7045  | 11.5963 | -1.5343 |

## 2\_TajimasD\_data

|     |      |          |         |         |         |
|-----|------|----------|---------|---------|---------|
| YRI | PGA3 | 60938515 | 5.4938  | 9.4115  | -1.2399 |
| YRI | PGA3 | 60943515 | 7.5241  | 9.7476  | -0.6811 |
| YRI | PGA3 | 60948515 | 10.0532 | 10.0837 | -0.0091 |
| YRI | PGA3 | 60953515 | 10.7983 | 9.9157  | 0.2661  |
| YRI | PGA3 | 60958515 | 10.776  | 11.9324 | -0.2931 |
| YRI | PGA3 | 60963515 | 10.061  | 15.2937 | -1.0485 |
| YRI | PGA3 | 60968515 | 13.2417 | 18.6549 | -0.8968 |
| YRI | PGA3 | 60973515 | 8.1695  | 10.4199 | -0.6478 |
| YRI | PGA3 | 60978515 | 1.7296  | 1.5126  | 0.3231  |
| YRI | PGA3 | 60983515 | 1.3012  | 1.5126  | -0.3148 |
| YRI | PGA3 | 60988515 | 0.0639  | 0.3361  | -1.0928 |
| YRI | PGA3 | 60993515 | 2.0659  | 1.1764  | 1.5909  |
| YRI | PGA3 | 60998515 | 2.5691  | 1.3445  | 1.989   |
| YRI | PGA3 | 61003515 | 0.5677  | 0.8403  | -0.6157 |
| YRI | PGA3 | 61008515 | 0.8133  | 1.0084  | -0.389  |
| YRI | PGA3 | 61013515 | 9.2065  | 12.4366 | -0.7875 |
| YRI | PGA3 | 61018515 | 12.769  | 18.991  | -1.0132 |
| YRI | PGA3 | 61023515 | 5.8698  | 10.4199 | -1.3098 |
| YRI | PGA3 | 61028515 | 6.1365  | 9.9157  | -1.1394 |
| YRI | PGA3 | 61033515 | 6.9167  | 11.7644 | -1.2454 |
| YRI | PGA3 | 61038515 | 5.8344  | 11.5963 | -1.5004 |
| YRI | PGA3 | 61043515 | 8.1128  | 12.1005 | -0.9976 |
| YRI | PGA3 | 61048515 | 6.1597  | 8.7392  | -0.8744 |
| YRI | PGA3 | 61053515 | 4.9339  | 7.7309  | -1.0613 |
| YRI | PGA3 | 61058515 | 6.5263  | 10.5879 | -1.1519 |
| YRI | PGA3 | 61063515 | 5.678   | 9.5795  | -1.2147 |
| YRI | PGA3 | 61068515 | 5.3421  | 7.8989  | -0.9512 |
| YRI | PGA3 | 61073515 | 6.8772  | 10.0837 | -0.9517 |
| YRI | PGA3 | 61078515 | 7.5029  | 12.4366 | -1.2028 |
| YRI | PGA3 | 61083515 | 9.8426  | 12.4366 | -0.6324 |
| YRI | PGA3 | 61088515 | 9.3849  | 10.756  | -0.3832 |
| YRI | PGA3 | 61093515 | 6.5687  | 10.5879 | -1.1398 |
| YRI | PGA3 | 61098515 | 6.5975  | 9.7476  | -0.965  |
| YRI | PGA3 | 61103515 | 7.9911  | 10.756  | -0.7726 |
| YRI | PGA3 | 61108515 | 9.1105  | 11.4282 | -0.6119 |
| YRI | PGA3 | 61113515 | 7.4235  | 9.9157  | -0.7514 |
| YRI | PGA3 | 61118515 | 7.3043  | 10.924  | -0.9969 |
| YRI | PGA3 | 61123515 | 6.2565  | 8.9073  | -0.8829 |
| YRI | PGA3 | 61128515 | 4.617   | 7.5628  | -1.1404 |
| YRI | PGA3 | 61133515 | 5.0039  | 10.4199 | -1.5591 |
| YRI | PGA3 | 61138515 | 7.393   | 12.2685 | -1.204  |
| YRI | PGA3 | 61143515 | 11.0485 | 11.2602 | -0.0567 |
| YRI | PGA3 | 61148515 | 9.6031  | 9.0754  | 0.1727  |
| YRI | PGA3 | 61153515 | 6.5897  | 8.9073  | -0.7719 |
| YRI | PGA3 | 61158515 | 6.0326  | 9.4115  | -1.0694 |
| YRI | PGA3 | 61163515 | 7.3422  | 8.5712  | -0.4241 |
| YRI | PGA3 | 61168515 | 6.7653  | 8.4031  | -0.5756 |
| YRI | PGA3 | 61173515 | 5.4255  | 8.235   | -1.006  |
| YRI | PGA3 | 61178515 | 6.2511  | 8.9073  | -0.8847 |

## 2\_TajimasD\_data

|     |      |          |         |         |         |
|-----|------|----------|---------|---------|---------|
| YRI | PGA3 | 61183515 | 6.0109  | 8.235   | -0.7964 |
| YRI | PGA3 | 61188515 | 5.9105  | 7.5628  | -0.6397 |
| YRI | PGA3 | 61193515 | 7.3626  | 10.5879 | -0.9147 |
| YRI | PGA3 | 61198515 | 10.3133 | 11.5963 | -0.3341 |
| YRI | PGA3 | 61203515 | 10.2362 | 10.5879 | -0.0997 |
| YRI | PGA3 | 61208515 | 8.2354  | 10.756  | -0.7044 |
| YRI | PGA3 | 61213515 | 8.8319  | 11.4282 | -0.6854 |
| YRI | PGA3 | 61218515 | 9.7689  | 10.4199 | -0.1874 |
| YRI | PGA3 | 61223515 | 8.0787  | 9.0754  | -0.3263 |
| YRI | PGA3 | 61228515 | 8.9822  | 9.9157  | -0.2815 |
| YRI | PGA3 | 61233515 | 9.1779  | 10.2518 | -0.3139 |
| YRI | PGA3 | 61238515 | 7.8481  | 10.0837 | -0.6636 |
| YRI | PGA3 | 61243515 | 7.3564  | 10.0837 | -0.8095 |
| YRI | PGA3 | 61248515 | 9.5588  | 11.7644 | -0.5666 |
| YRI | PGA3 | 61253515 | 14.0233 | 16.134  | -0.4019 |
| YRI | PGA3 | 61258515 | 12.8411 | 18.4868 | -0.9435 |
| YRI | PGA3 | 61263515 | 12.4446 | 20.5036 | -1.219  |
| YRI | PGA3 | 61268515 | 11.5417 | 18.3188 | -1.1425 |
| YRI | PGA3 | 61273515 | 7.3987  | 11.9324 | -1.1493 |
| YRI | PGA3 | 61278515 | 9.1636  | 12.1005 | -0.7348 |
| YRI | PGA3 | 61283515 | 11.2828 | 13.7811 | -0.5527 |
| YRI | PGA3 | 61288515 | 8.5085  | 11.5963 | -0.8041 |
| YRI | PGA3 | 61293515 | 5.1452  | 9.5795  | -1.3805 |
| YRI | PGA3 | 61298515 | 5.2749  | 11.2602 | -1.6023 |
| YRI | PGA3 | 61303515 | 6.4287  | 10.756  | -1.2093 |
| YRI | PGA3 | 61308515 | 4.6368  | 7.5628  | -1.1327 |
| YRI | PGA3 | 61313515 | 3.9888  | 7.7309  | -1.4198 |
| YRI | PGA3 | 61318515 | 4.5682  | 11.2602 | -1.7915 |
| YRI | PGA3 | 61323515 | 7.2876  | 12.7727 | -1.304  |
| YRI | PGA3 | 61328515 | 7.9432  | 11.4282 | -0.9201 |
| YRI | PGA3 | 61333515 | 6.4016  | 9.0754  | -0.8753 |
| YRI | PGA3 | 61338515 | 8.2848  | 10.5879 | -0.6531 |
| YRI | PGA3 | 61343515 | 8.3519  | 11.9324 | -0.9077 |
| YRI | PGA3 | 61348515 | 8.6195  | 10.756  | -0.597  |
| YRI | PGA3 | 61353515 | 9.6734  | 11.9324 | -0.5727 |
| YRI | PGA3 | 61358515 | 6.7796  | 11.2602 | -1.1995 |
| YRI | PGA3 | 61363515 | 4.9195  | 11.0921 | -1.6759 |
| YRI | PGA3 | 61368515 | 4.7769  | 12.1005 | -1.8322 |
| YRI | PGA3 | 61373515 | 6.0251  | 12.2685 | -1.5418 |
| YRI | PGA3 | 61378515 | 6.8782  | 10.756  | -1.0836 |
| YRI | PGA3 | 61383515 | 5.8118  | 9.4115  | -1.1393 |
| YRI | PGA3 | 61388515 | 10.153  | 13.1089 | -0.6857 |
| YRI | PGA3 | 61393515 | 14.1278 | 17.3104 | -0.5665 |
| YRI | PGA3 | 61398515 | 13.511  | 15.7978 | -0.4442 |
| YRI | PGA3 | 61403515 | 11.5395 | 14.7895 | -0.6723 |
| YRI | PGA3 | 61408515 | 11.698  | 16.134  | -0.8446 |
| YRI | PGA3 | 61413515 | 11.2791 | 14.1172 | -0.6137 |
| YRI | PGA3 | 61418515 | 7.0138  | 11.2602 | -1.1368 |
| YRI | PGA3 | 61423515 | 5.7427  | 11.7644 | -1.547  |

## 2\_TajimasD\_data

|     |      |          |         |         |         |
|-----|------|----------|---------|---------|---------|
| YRI | PGA3 | 61428515 | 7.4425  | 11.9324 | -1.1382 |
| YRI | PGA3 | 61433515 | 8.3024  | 11.2602 | -0.7918 |
| YRI | PGA3 | 61438515 | 8.1181  | 11.0921 | -0.8075 |
| YRI | PGA3 | 61443515 | 7.2222  | 9.5795  | -0.7339 |
| YRI | PGA3 | 61448515 | 5.2002  | 8.235   | -1.0866 |
| YRI | PGA3 | 61453515 | 5.0511  | 9.4115  | -1.38   |
| YRI | PGA3 | 61458515 | 6.5818  | 10.924  | -1.1959 |
| YRI | PGA3 | 61463515 | 7.1822  | 11.9324 | -1.2042 |
| YRI | PGA3 | 61468515 | 7.0191  | 11.4282 | -1.164  |
| YRI | PGA3 | 61473515 | 5.3137  | 8.9073  | -1.1969 |
| YRI | PGA3 | 61478515 | 7.8894  | 10.756  | -0.8011 |
| YRI | PGA3 | 61483515 | 8.9631  | 11.0921 | -0.578  |
| YRI | PGA3 | 61488515 | 6.1009  | 9.5795  | -1.083  |
| YRI | PGA3 | 61493515 | 5.8962  | 9.9157  | -1.2119 |
| YRI | PGA3 | 61498515 | 5.8081  | 8.9073  | -1.0322 |
| YRI | PGA3 | 61503515 | 6.8211  | 9.9157  | -0.933  |
| YRI | PGA3 | 61508515 | 7.0061  | 12.6047 | -1.3477 |
| YRI | PGA3 | 61513515 | 6.5666  | 12.1005 | -1.3845 |
| YRI | PGA3 | 61518515 | 7.9504  | 9.5795  | -0.5072 |
| YRI | PGA3 | 61523515 | 11.4907 | 11.2602 | 0.0617  |
| YRI | PGA3 | 61528515 | 10.6404 | 13.445  | -0.6352 |
| YRI | PGA3 | 61533515 | 7.8242  | 11.7644 | -1.0123 |
| YRI | PGA3 | 61538515 | 6.6895  | 9.9157  | -0.9727 |
| YRI | PGA3 | 61543515 | 3.459   | 7.7309  | -1.6209 |
| YRI | PGA3 | 61548515 | 2.2758  | 5.7141  | -1.7145 |
| YRI | PGA3 | 61553515 | 2.5057  | 5.7141  | -1.5999 |
| YRI | PGA3 | 61558515 | 1.5621  | 5.7141  | -2.0704 |
| YRI | PGA3 | 61563515 | 1.6504  | 7.0586  | -2.2295 |
| YRI | PGA3 | 61568515 | 2.1968  | 6.8906  | -1.9778 |
| YRI | PGA3 | 61573515 | 2.0197  | 5.5461  | -1.8058 |
| YRI | PGA3 | 61578515 | 2.2922  | 7.3947  | -2.0163 |
| YRI | PGA3 | 61583515 | 2.4464  | 8.5712  | -2.1137 |
| YRI | PGA3 | 61588515 | 3.0484  | 8.7392  | -1.929  |
| YRI | PGA3 | 61593515 | 3.9476  | 9.2434  | -1.7043 |
| YRI | PGA3 | 61598515 | 5.3895  | 11.4282 | -1.5942 |
| YRI | PGA3 | 61603515 | 8.4283  | 13.445  | -1.1361 |
| YRI | PGA3 | 61608515 | 8.4499  | 13.7811 | -1.1794 |
| YRI | PGA3 | 61613515 | 11.293  | 14.4534 | -0.6683 |
| YRI | PGA3 | 61618515 | 16.6238 | 15.4617 | 0.2304  |
| YRI | PGA3 | 61623515 | 17.8977 | 18.823  | -0.152  |
| YRI | PGA3 | 61628515 | 18.1067 | 21.8481 | -0.5323 |
| YRI | PGA3 | 61633515 | 15.0877 | 22.8565 | -1.0581 |
| YRI | PGA3 | 61638515 | 13.0686 | 19.4952 | -1.0205 |
| YRI | PGA3 | 61643515 | 11.5995 | 14.7895 | -0.6599 |
| YRI | PGA3 | 61648515 | 8.499   | 13.613  | -1.1446 |
| YRI | PGA3 | 61653515 | 11.2342 | 13.445  | -0.5007 |
| YRI | PGA3 | 61658515 | 12.6212 | 15.9659 | -0.6432 |
| YRI | PGA3 | 61663515 | 8.6626  | 15.2937 | -1.3287 |
| YRI | PGA3 | 61668515 | 7.8969  | 13.1089 | -1.209  |

## 2\_TajimasD\_data

|     |          |          |         |         |         |
|-----|----------|----------|---------|---------|---------|
| YRI | PGA3     | 61673515 | 6.6765  | 11.5963 | -1.2811 |
| YRI | PGA3     | 61678515 | 5.216   | 9.5795  | -1.3585 |
| YRI | PGA3     | 61683515 | 7.3688  | 12.1005 | -1.1838 |
| YRI | PGA3     | 61688515 | 10.1889 | 14.7895 | -0.9517 |
| YRI | PGA3     | 61693515 | 12.271  | 15.2937 | -0.6057 |
| YRI | PGA3     | 61698515 | 12.7569 | 15.6298 | -0.5638 |
| YRI | PGA3     | 61703515 | 11.1682 | 13.7811 | -0.5781 |
| CEU | PRAMEF14 | 12846892 | 9.7893  | 11.5982 | -0.4739 |
| CEU | PRAMEF14 | 12851892 | 16.7456 | 18.7619 | -0.3343 |
| CEU | PRAMEF14 | 12856892 | 21.6483 | 19.6147 | 0.323   |
| CEU | PRAMEF14 | 12861892 | 20.839  | 28.3134 | -0.8321 |
| CEU | PRAMEF14 | 12866892 | 29.6277 | 59.1852 | -1.5961 |
| CEU | PRAMEF14 | 12871892 | 26.4409 | 46.9047 | -1.3897 |
| CEU | PRAMEF14 | 12876892 | 14.3539 | 14.3272 | 0.0057  |
| CEU | PRAMEF14 | 12881892 | 17.9588 | 13.8156 | 0.9202  |
| CEU | PRAMEF14 | 12886892 | 22.727  | 16.374  | 1.2001  |
| CEU | PRAMEF14 | 12891892 | 19.4835 | 15.6917 | 0.746   |
| CEU | PRAMEF14 | 12896892 | 21.6038 | 24.7316 | -0.3971 |
| CEU | PRAMEF14 | 12901892 | 16.9388 | 22.6848 | -0.7932 |
| CEU | PRAMEF14 | 12906892 | 9.1203  | 15.0095 | -1.2088 |
| CEU | PRAMEF14 | 12911892 | 12.5656 | 19.9558 | -1.1546 |
| CEU | PRAMEF14 | 12916892 | 19.9852 | 27.6311 | -0.8716 |
| CEU | PRAMEF14 | 12921892 | 18.9324 | 24.7316 | -0.7363 |
| CEU | PRAMEF14 | 12926892 | 7.295   | 10.2337 | -0.8658 |
| CEU | PRAMEF14 | 12931892 | 6.7001  | 7.8459  | -0.4316 |
| CEU | PRAMEF14 | 12936892 | 11.7546 | 12.9627 | -0.285  |
| CEU | PRAMEF14 | 12941892 | 16.0483 | 17.9091 | -0.3226 |
| CEU | PRAMEF14 | 12946892 | 11.6223 | 12.4511 | -0.2031 |
| CEU | PRAMEF14 | 12951892 | 5.6698  | 9.8926  | -1.284  |
| CEU | PRAMEF14 | 12956892 | 4.4224  | 8.0164  | -1.3275 |
| CEU | PRAMEF14 | 12961892 | 2.9054  | 2.8996  | 0.0052  |
| CEU | PRAMEF14 | 12966892 | 1.0027  | 1.1939  | -0.3407 |
| CEU | PRAMEF14 | 12971892 | 0.2263  | 0.5117  | -0.8951 |
| CEU | PRAMEF14 | 12976892 | 0.5964  | 1.7056  | -1.5192 |
| CEU | PRAMEF14 | 12981892 | 2.5364  | 6.1402  | -1.6958 |
| CEU | PRAMEF14 | 12986892 | 4.0317  | 6.3108  | -1.0464 |
| CEU | PRAMEF14 | 12991892 | 3.3587  | 4.4346  | -0.6751 |
| CEU | PRAMEF14 | 12996892 | 3.4875  | 6.3108  | -1.2962 |
| CEU | PRAMEF14 | 13001892 | 2.3078  | 3.9229  | -1.1265 |
| CEU | PRAMEF14 | 13006892 | 1.3344  | 2.2173  | -0.9864 |
| CEU | PRAMEF14 | 13011892 | 4.8369  | 6.1402  | -0.6133 |
| CEU | PRAMEF14 | 13016892 | 3.7982  | 5.6286  | -0.9311 |
| CEU | PRAMEF14 | 13021892 | 0.3577  | 1.7056  | -1.8461 |
| CEU | PRAMEF14 | 13026892 | 0.1796  | 0.6822  | -1.3124 |
| CEU | PRAMEF14 | 13031892 | 0.3756  | 0.6822  | -0.8006 |
| CEU | PRAMEF14 | 13036892 | 3.7852  | 2.3879  | 1.4715  |
| CEU | PRAMEF14 | 13041892 | 3.4197  | 1.8762  | 1.9651  |
| CEU | PRAMEF14 | 13046892 | 4.7734  | 7.3342  | -1.026  |
| CEU | PRAMEF14 | 13051892 | 5.8868  | 8.187   | -0.8333 |

## 2\_TajimasD\_data

|     |          |          |         |         |         |
|-----|----------|----------|---------|---------|---------|
| CEU | PRAMEF14 | 13056892 | 1.1134  | 0.8528  | 0.5869  |
| CEU | PRAMEF14 | 13061892 | 0       | 0       | 0       |
| CEU | PRAMEF14 | 13066892 | 0       | 0       | 0       |
| CEU | PRAMEF14 | 13071892 | 0       | 0       | 0       |
| CEU | PRAMEF14 | 13076892 | 0       | 0       | 0       |
| CEU | PRAMEF14 | 13081892 | 0       | 0       | 0       |
| CEU | PRAMEF14 | 13086892 | 0       | 0       | 0       |
| CEU | PRAMEF14 | 13091892 | 0       | 0       | 0       |
| CEU | PRAMEF14 | 13096892 | 0       | 0       | 0       |
| CEU | PRAMEF14 | 13101892 | 0       | 0       | 0       |
| CEU | PRAMEF14 | 13106892 | 1.242   | 1.1939  | 0.0857  |
| CEU | PRAMEF14 | 13111892 | 1.242   | 1.1939  | 0.0857  |
| CEU | PRAMEF14 | 13116892 | 0.9544  | 2.3879  | -1.5096 |
| CEU | PRAMEF14 | 13121892 | 7.2367  | 10.916  | -1.0205 |
| CEU | PRAMEF14 | 13126892 | 13.6203 | 16.8857 | -0.599  |
| CEU | PRAMEF14 | 13131892 | 11.41   | 11.0866 | 0.0884  |
| CEU | PRAMEF14 | 13136892 | 8.1909  | 5.1169  | 1.7015  |
| CEU | PRAMEF14 | 13141892 | 5.6034  | 4.7757  | 0.4868  |
| CEU | PRAMEF14 | 13146892 | 2.4653  | 4.6052  | -1.2992 |
| CEU | PRAMEF14 | 13151892 | 1.5003  | 2.5584  | -1.054  |
| CEU | PRAMEF14 | 13156892 | 1.3117  | 2.2173  | -1.0117 |
| CEU | PRAMEF14 | 13161892 | 1.6731  | 2.8996  | -1.103  |
| CEU | PRAMEF14 | 13166892 | 1.9946  | 2.0467  | -0.062  |
| CEU | PRAMEF14 | 13171892 | 7.0289  | 7.8459  | -0.3078 |
| CEU | PRAMEF14 | 13176892 | 14.4067 | 19.103  | -0.7652 |
| CEU | PRAMEF14 | 13181892 | 15.94   | 19.103  | -0.5154 |
| CEU | PRAMEF14 | 13186892 | 13.5123 | 12.1099 | 0.3528  |
| CEU | PRAMEF14 | 13191892 | 6.678   | 5.9697  | 0.3418  |
| CEU | PRAMEF14 | 13196892 | 0.9194  | 2.3879  | -1.5465 |
| CEU | PRAMEF14 | 13201892 | 2.1886  | 3.2407  | -0.8627 |
| CEU | PRAMEF14 | 13206892 | 2.1008  | 1.8762  | 0.286   |
| CEU | PRAMEF14 | 13211892 | 1.3088  | 2.0467  | -0.878  |
| CEU | PRAMEF14 | 13216892 | 1.6945  | 2.8996  | -1.0838 |
| CEU | PRAMEF14 | 13221892 | 0.5931  | 1.0234  | -0.855  |
| CEU | PRAMEF14 | 13226892 | 0       | 0       | 0       |
| CEU | PRAMEF14 | 13231892 | 0       | 0       | 0       |
| CEU | PRAMEF14 | 13236892 | 0       | 0       | 0       |
| CEU | PRAMEF14 | 13241892 | 0       | 0       | 0       |
| CEU | PRAMEF14 | 13246892 | 0       | 0       | 0       |
| CEU | PRAMEF14 | 13251892 | 0       | 0       | 0       |
| CEU | PRAMEF14 | 13256892 | 0       | 0       | 0       |
| CEU | PRAMEF14 | 13261892 | 0       | 0       | 0       |
| CEU | PRAMEF14 | 13266892 | 0       | 0       | 0       |
| CEU | PRAMEF14 | 13271892 | 0       | 0       | 0       |
| CEU | PRAMEF14 | 13276892 | 0       | 0       | 0       |
| CEU | PRAMEF14 | 13281892 | 0       | 0       | 0       |
| CEU | PRAMEF14 | 13286892 | 0       | 0       | 0       |
| CEU | PRAMEF14 | 13291892 | 0       | 0       | 0       |
| CEU | PRAMEF14 | 13296892 | 0       | 0       | 0       |

## 2\_TajimasD\_data

|     |          |          |         |        |         |
|-----|----------|----------|---------|--------|---------|
| CEU | PRAMEF14 | 13301892 | 0       | 0      | 0       |
| CEU | PRAMEF14 | 13306892 | 0       | 0      | 0       |
| CEU | PRAMEF14 | 13311892 | 0       | 0      | 0       |
| CEU | PRAMEF14 | 13316892 | 0       | 0      | 0       |
| CEU | PRAMEF14 | 13321892 | 0       | 0      | 0       |
| CEU | PRAMEF14 | 13326892 | 0.6654  | 2.0467 | -1.6436 |
| CEU | PRAMEF14 | 13331892 | 0.6654  | 2.5584 | -1.8857 |
| CEU | PRAMEF14 | 13336892 | 0.0101  | 0.6822 | -1.7551 |
| CEU | PRAMEF14 | 13341892 | 0.7172  | 1.0234 | -0.6084 |
| CEU | PRAMEF14 | 13346892 | 1.1989  | 1.7056 | -0.694  |
| CEU | PRAMEF14 | 13351892 | 4.0612  | 7.3342 | -1.3114 |
| CEU | PRAMEF14 | 13356892 | 3.7149  | 6.8225 | -1.3297 |
| CEU | PRAMEF14 | 13361892 | 1.4242  | 1.1939 | 0.4104  |
| CEU | PRAMEF14 | 13366892 | 1.5366  | 1.0234 | 1.0198  |
| CEU | PRAMEF14 | 13371892 | 3.1179  | 1.3645 | 2.8366  |
| CEU | PRAMEF14 | 13376892 | 10.3927 | 5.7991 | 2.2752  |
| CEU | PRAMEF14 | 13381892 | 14.0944 | 9.8926 | 1.2776  |
| CEU | PRAMEF14 | 13386892 | 6.5617  | 5.2874 | 0.6852  |
| CEU | PRAMEF14 | 13391892 | 0       | 0      | 0       |
| CEU | PRAMEF14 | 13396892 | 0       | 0      | 0       |
| CEU | PRAMEF14 | 13401892 | 0       | 0      | 0       |
| CEU | PRAMEF14 | 13406892 | 0       | 0      | 0       |
| CEU | PRAMEF14 | 13411892 | 2.965   | 1.8762 | 1.3862  |
| CEU | PRAMEF14 | 13416892 | 2.965   | 1.8762 | 1.3862  |
| CEU | PRAMEF14 | 13421892 | 0.4877  | 0.3411 | 0.5877  |
| CEU | PRAMEF14 | 13426892 | 0.5659  | 0.5117 | 0.17    |
| CEU | PRAMEF14 | 13431892 | 0.0781  | 0.1706 | -0.5495 |
| CEU | PRAMEF14 | 13436892 | 0       | 0      | 0       |
| CEU | PRAMEF14 | 13441892 | 0       | 0      | 0       |
| CEU | PRAMEF14 | 13446892 | 1.3636  | 1.1939 | 0.3024  |
| CEU | PRAMEF14 | 13451892 | 1.9771  | 1.8762 | 0.1285  |
| CEU | PRAMEF14 | 13456892 | 0.6135  | 0.6822 | -0.1794 |
| CEU | PRAMEF14 | 13461892 | 1.3686  | 1.1939 | 0.3113  |
| CEU | PRAMEF14 | 13466892 | 1.9272  | 1.5351 | 0.5814  |
| CEU | PRAMEF14 | 13471892 | 1.0845  | 1.7056 | -0.8507 |
| CEU | PRAMEF14 | 13476892 | 3.569   | 3.0701 | 0.4279  |
| CEU | PRAMEF14 | 13481892 | 5.5236  | 4.4346 | 0.6833  |
| CEU | PRAMEF14 | 13486892 | 5.455   | 5.6286 | -0.0883 |
| CEU | PRAMEF14 | 13491892 | 3.283   | 3.2407 | 0.0347  |
| CEU | PRAMEF14 | 13496892 | 2.5698  | 2.5584 | 0.0114  |
| CEU | PRAMEF14 | 13501892 | 2.9342  | 3.0701 | -0.1166 |
| CEU | PRAMEF14 | 13506892 | 0.7594  | 1.0234 | -0.5246 |
| CEU | PRAMEF14 | 13511892 | 2.0959  | 1.1939 | 1.6074  |
| CEU | PRAMEF14 | 13516892 | 2.8738  | 3.9229 | -0.7317 |
| CEU | PRAMEF14 | 13521892 | 0.8644  | 2.8996 | -1.8303 |
| CEU | PRAMEF14 | 13526892 | 0       | 0      | 0       |
| CEU | PRAMEF14 | 13531892 | 1.6549  | 1.3645 | 0.4698  |
| CEU | PRAMEF14 | 13536892 | 1.6549  | 1.3645 | 0.4698  |
| CEU | PRAMEF14 | 13541892 | 0.3004  | 0.1706 | 0.771   |

## 2\_TajimasD\_data

|     |          |          |         |         |         |
|-----|----------|----------|---------|---------|---------|
| CEU | PRAMEF14 | 13546892 | 0.851   | 0.5117  | 1.0641  |
| CEU | PRAMEF14 | 13551892 | 1.517   | 1.0234  | 0.9808  |
| CEU | PRAMEF14 | 13556892 | 0.9664  | 0.6822  | 0.7421  |
| CEU | PRAMEF14 | 13561892 | 0       | 0       | 0       |
| CEU | PRAMEF14 | 13566892 | 0       | 0       | 0       |
| CEU | PRAMEF14 | 13571892 | 0       | 0       | 0       |
| CEU | PRAMEF14 | 13576892 | 0       | 0       | 0       |
| CEU | PRAMEF14 | 13581892 | 0       | 0       | 0       |
| CEU | PRAMEF14 | 13586892 | 0       | 0       | 0       |
| CEU | PRAMEF14 | 13591892 | 0       | 0       | 0       |
| CEU | PRAMEF14 | 13596892 | 0       | 0       | 0       |
| CEU | PRAMEF14 | 13601892 | 0       | 0       | 0       |
| CEU | PRAMEF14 | 13606892 | 0       | 0       | 0       |
| CEU | PRAMEF14 | 13611892 | 0       | 0       | 0       |
| CEU | PRAMEF14 | 13616892 | 0       | 0       | 0       |
| CEU | PRAMEF14 | 13621892 | 0       | 0       | 0       |
| CEU | PRAMEF14 | 13626892 | 0       | 0       | 0       |
| CEU | PRAMEF14 | 13631892 | 1.4345  | 3.0701  | -1.403  |
| CEU | PRAMEF14 | 13636892 | 1.6079  | 3.4112  | -1.4163 |
| CEU | PRAMEF14 | 13641892 | 0.1934  | 0.5117  | -0.9983 |
| CEU | PRAMEF14 | 13646892 | 0.02    | 0.1706  | -0.8946 |
| CEU | PRAMEF14 | 13651892 | 0.0101  | 0.1706  | -0.9534 |
| CEU | PRAMEF14 | 13656892 | 0.0202  | 0.3411  | -1.2864 |
| CEU | PRAMEF14 | 13661892 | 0.0101  | 0.1706  | -0.9534 |
| CEU | PRAMEF14 | 13666892 | 1.5242  | 0.6822  | 2.1987  |
| CEU | PRAMEF14 | 13671892 | 1.6236  | 1.0234  | 1.1926  |
| CEU | PRAMEF14 | 13676892 | 0.0994  | 0.3411  | -0.9689 |
| CEU | PRAMEF14 | 13681892 | 0       | 0       | 0       |
| CEU | PRAMEF14 | 13686892 | 0.1769  | 0.6822  | -1.3195 |
| CEU | PRAMEF14 | 13691892 | 1.0369  | 2.8996  | -1.6752 |
| CEU | PRAMEF14 | 13696892 | 0.86    | 2.2173  | -1.5164 |
| CEU | PRAMEF14 | 13701892 | 2.6236  | 3.2407  | -0.506  |
| CEU | PRAMEF14 | 13706892 | 3.7291  | 4.6052  | -0.5319 |
| CEU | PRAMEF14 | 13711892 | 1.9375  | 1.8762  | 0.078   |
| CEU | PRAMEF14 | 13716892 | 3.1725  | 3.9229  | -0.5234 |
| CEU | PRAMEF14 | 13721892 | 2.7396  | 4.2641  | -0.9896 |
| CEU | PRAMEF14 | 13726892 | 0.3991  | 0.8528  | -1.0217 |
| CEU | PRAMEF14 | 13731892 | 2.6024  | 1.7056  | 1.2283  |
| CEU | PRAMEF14 | 13736892 | 3.3599  | 2.2173  | 1.2765  |
| CEU | PRAMEF14 | 13741892 | 0.7879  | 0.8528  | -0.1462 |
| CEU | PRAMEF14 | 13746892 | 0.0303  | 0.3411  | -1.2459 |
| CEU | PRAMEF14 | 13751892 | 0       | 0       | 0       |
| CEU | PRAMEF14 | 13756892 | 0       | 0       | 0       |
| CEU | PRAMEF14 | 13761892 | 0       | 0       | 0       |
| CEU | PRAMEF14 | 13766892 | 0.4455  | 0.8528  | -0.9172 |
| CEU | PRAMEF14 | 13771892 | 2.9093  | 4.2641  | -0.8795 |
| CEU | PRAMEF14 | 13776892 | 4.5331  | 5.1169  | -0.3231 |
| CEU | PRAMEF14 | 13781892 | 15.7471 | 10.4043 | 1.5499  |
| CEU | PRAMEF14 | 13786892 | 20.4943 | 14.4978 | 1.2722  |



## 2\_TajimasD\_data

|     |          |          |         |         |         |
|-----|----------|----------|---------|---------|---------|
| CEU | PRAMEF14 | 13791892 | 17.2501 | 12.9627 | 1.0115  |
| CEU | PRAMEF14 | 13796892 | 16.1666 | 12.6216 | 0.8577  |
| CEU | PRAMEF14 | 13801892 | 12.0546 | 11.7688 | 0.0739  |
| CEU | PRAMEF14 | 13806892 | 13.484  | 13.4744 | 0.0022  |
| CEU | PRAMEF14 | 13811892 | 13.4484 | 11.9394 | 0.3847  |
| CEU | PRAMEF14 | 13816892 | 12.9093 | 11.0866 | 0.4982  |
| CEU | PRAMEF14 | 13821892 | 16.4959 | 13.4744 | 0.6872  |
| CEU | PRAMEF14 | 13826892 | 14.7538 | 14.1567 | 0.1296  |
| CEU | PRAMEF14 | 13831892 | 11.9268 | 13.9861 | -0.4521 |
| CEU | PRAMEF14 | 13836892 | 12.9052 | 11.7688 | 0.2937  |
| CEU | PRAMEF14 | 13841892 | 11.8134 | 10.0632 | 0.5238  |
| CHB | PRAMEF14 | 12846892 | 10.8094 | 12.3673 | -0.3831 |
| CHB | PRAMEF14 | 12851892 | 17.6309 | 19.3133 | -0.2705 |
| CHB | PRAMEF14 | 12856892 | 22.2981 | 21.0075 | 0.1913  |
| CHB | PRAMEF14 | 12861892 | 18.8898 | 28.6311 | -1.0696 |
| CHB | PRAMEF14 | 12866892 | 23.5326 | 58.4482 | -1.9035 |
| CHB | PRAMEF14 | 12871892 | 21.4057 | 45.7421 | -1.6892 |
| CHB | PRAMEF14 | 12876892 | 10.9457 | 15.2474 | -0.8674 |
| CHB | PRAMEF14 | 12881892 | 13.1258 | 16.9415 | -0.6957 |
| CHB | PRAMEF14 | 12886892 | 18.11   | 18.6357 | -0.0875 |
| CHB | PRAMEF14 | 12891892 | 15.924  | 17.1109 | -0.2143 |
| CHB | PRAMEF14 | 12896892 | 31.9281 | 26.5982 | 0.6287  |
| CHB | PRAMEF14 | 12901892 | 31.7391 | 23.5487 | 1.0874  |
| CHB | PRAMEF14 | 12906892 | 23.6997 | 17.6192 | 1.0677  |
| CHB | PRAMEF14 | 12911892 | 32.9104 | 22.7016 | 1.4043  |
| CHB | PRAMEF14 | 12916892 | 32.4942 | 27.4452 | 0.5777  |
| CHB | PRAMEF14 | 12921892 | 23.6166 | 23.3793 | 0.0317  |
| CHB | PRAMEF14 | 12926892 | 9.3099  | 9.3178  | -0.0025 |
| CHB | PRAMEF14 | 12931892 | 7.3733  | 7.2848  | 0.0356  |
| CHB | PRAMEF14 | 12936892 | 10.2543 | 14.2309 | -0.8562 |
| CHB | PRAMEF14 | 12941892 | 13.7144 | 20.4992 | -1.03   |
| CHB | PRAMEF14 | 12946892 | 9.3486  | 14.7391 | -1.1226 |
| CHB | PRAMEF14 | 12951892 | 4.2182  | 11.5202 | -1.9198 |
| CHB | PRAMEF14 | 12956892 | 4.4575  | 8.979   | -1.4999 |
| CHB | PRAMEF14 | 12961892 | 2.9271  | 3.5577  | -0.4766 |
| CHB | PRAMEF14 | 12966892 | 0.5839  | 2.5412  | -1.9545 |
| CHB | PRAMEF14 | 12971892 | 0.1355  | 1.8636  | -2.2048 |
| CHB | PRAMEF14 | 12976892 | 0.305   | 2.033   | -2.0607 |
| CHB | PRAMEF14 | 12981892 | 2.6423  | 5.7601  | -1.549  |
| CHB | PRAMEF14 | 12986892 | 3.8192  | 5.7601  | -0.9643 |
| CHB | PRAMEF14 | 12991892 | 2.6811  | 4.066   | -0.9339 |
| CHB | PRAMEF14 | 12996892 | 2.8214  | 5.5907  | -1.413  |
| CHB | PRAMEF14 | 13001892 | 1.6318  | 3.7271  | -1.5222 |
| CHB | PRAMEF14 | 13006892 | 0.9482  | 1.5247  | -0.8565 |
| CHB | PRAMEF14 | 13011892 | 3.2102  | 4.2354  | -0.6674 |
| CHB | PRAMEF14 | 13016892 | 2.4816  | 4.066   | -1.0684 |
| CHB | PRAMEF14 | 13021892 | 0.2654  | 1.1859  | -1.6431 |
| CHB | PRAMEF14 | 13026892 | 0.0748  | 0.3388  | -1.059  |
| CHB | PRAMEF14 | 13031892 | 0.4582  | 0.5082  | -0.157  |

## 2\_TajimasD\_data

|     |          |          |         |         |         |
|-----|----------|----------|---------|---------|---------|
| CHB | PRAMEF14 | 13036892 | 4.1017  | 2.7106  | 1.3181  |
| CHB | PRAMEF14 | 13041892 | 3.6532  | 2.3718  | 1.3526  |
| CHB | PRAMEF14 | 13046892 | 11.3802 | 8.979   | 0.7966  |
| CHB | PRAMEF14 | 13051892 | 12.6577 | 10.1649 | 0.7369  |
| CHB | PRAMEF14 | 13056892 | 1.2873  | 1.3553  | -0.1102 |
| CHB | PRAMEF14 | 13061892 | 0       | 0       | 0       |
| CHB | PRAMEF14 | 13066892 | 0       | 0       | 0       |
| CHB | PRAMEF14 | 13071892 | 0       | 0       | 0       |
| CHB | PRAMEF14 | 13076892 | 0       | 0       | 0       |
| CHB | PRAMEF14 | 13081892 | 0       | 0       | 0       |
| CHB | PRAMEF14 | 13086892 | 0       | 0       | 0       |
| CHB | PRAMEF14 | 13091892 | 0       | 0       | 0       |
| CHB | PRAMEF14 | 13096892 | 0       | 0       | 0       |
| CHB | PRAMEF14 | 13101892 | 0.0097  | 0.1694  | -0.949  |
| CHB | PRAMEF14 | 13106892 | 1.2136  | 0.6777  | 1.401   |
| CHB | PRAMEF14 | 13111892 | 1.2039  | 0.5082  | 2.1839  |
| CHB | PRAMEF14 | 13116892 | 2.2545  | 1.5247  | 1.0842  |
| CHB | PRAMEF14 | 13121892 | 5.9431  | 8.8096  | -0.9678 |
| CHB | PRAMEF14 | 13126892 | 8.9218  | 15.2474 | -1.2754 |
| CHB | PRAMEF14 | 13131892 | 8.8064  | 11.5202 | -0.7135 |
| CHB | PRAMEF14 | 13136892 | 7.1949  | 5.7601  | 0.7128  |
| CHB | PRAMEF14 | 13141892 | 6.608   | 4.5742  | 1.2384  |
| CHB | PRAMEF14 | 13146892 | 6.9898  | 5.2519  | 0.9373  |
| CHB | PRAMEF14 | 13151892 | 4.4987  | 3.2189  | 1.0522  |
| CHB | PRAMEF14 | 13156892 | 1.1464  | 1.5247  | -0.562  |
| CHB | PRAMEF14 | 13161892 | 1.3649  | 2.7106  | -1.2751 |
| CHB | PRAMEF14 | 13166892 | 1.9798  | 2.8801  | -0.8117 |
| CHB | PRAMEF14 | 13171892 | 9.4338  | 8.979   | 0.1509  |
| CHB | PRAMEF14 | 13176892 | 28.5302 | 21.3463 | 1.0488  |
| CHB | PRAMEF14 | 13181892 | 29.2343 | 22.5322 | 0.9286  |
| CHB | PRAMEF14 | 13186892 | 15.6969 | 14.0615 | 0.3562  |
| CHB | PRAMEF14 | 13191892 | 7.3741  | 6.2684  | 0.5092  |
| CHB | PRAMEF14 | 13196892 | 1.5797  | 3.0495  | -1.264  |
| CHB | PRAMEF14 | 13201892 | 2.6101  | 4.2354  | -1.0581 |
| CHB | PRAMEF14 | 13206892 | 1.656   | 2.8801  | -1.1037 |
| CHB | PRAMEF14 | 13211892 | 1.7323  | 2.2024  | -0.5264 |
| CHB | PRAMEF14 | 13216892 | 2.6886  | 3.7271  | -0.7544 |
| CHB | PRAMEF14 | 13221892 | 1.023   | 2.033   | -1.2044 |
| CHB | PRAMEF14 | 13226892 | 0       | 0       | 0       |
| CHB | PRAMEF14 | 13231892 | 0       | 0       | 0       |
| CHB | PRAMEF14 | 13236892 | 0       | 0       | 0       |
| CHB | PRAMEF14 | 13241892 | 0       | 0       | 0       |
| CHB | PRAMEF14 | 13246892 | 0       | 0       | 0       |
| CHB | PRAMEF14 | 13251892 | 0       | 0       | 0       |
| CHB | PRAMEF14 | 13256892 | 0       | 0       | 0       |
| CHB | PRAMEF14 | 13261892 | 0       | 0       | 0       |
| CHB | PRAMEF14 | 13266892 | 0       | 0       | 0       |
| CHB | PRAMEF14 | 13271892 | 0       | 0       | 0       |
| CHB | PRAMEF14 | 13276892 | 0       | 0       | 0       |

## 2\_TajimasD\_data

|     |          |          |         |        |         |
|-----|----------|----------|---------|--------|---------|
| CHB | PRAMEF14 | 13281892 | 0       | 0      | 0       |
| CHB | PRAMEF14 | 13286892 | 0       | 0      | 0       |
| CHB | PRAMEF14 | 13291892 | 0       | 0      | 0       |
| CHB | PRAMEF14 | 13296892 | 0       | 0      | 0       |
| CHB | PRAMEF14 | 13301892 | 0       | 0      | 0       |
| CHB | PRAMEF14 | 13306892 | 0       | 0      | 0       |
| CHB | PRAMEF14 | 13311892 | 0       | 0      | 0       |
| CHB | PRAMEF14 | 13316892 | 0       | 0      | 0       |
| CHB | PRAMEF14 | 13321892 | 0       | 0      | 0       |
| CHB | PRAMEF14 | 13326892 | 2.462   | 2.2024 | 0.2907  |
| CHB | PRAMEF14 | 13331892 | 2.4717  | 2.8801 | -0.3682 |
| CHB | PRAMEF14 | 13336892 | 0.0097  | 0.6777 | -1.7463 |
| CHB | PRAMEF14 | 13341892 | 0.7369  | 0.8471 | -0.2485 |
| CHB | PRAMEF14 | 13346892 | 1.0364  | 2.033  | -1.1885 |
| CHB | PRAMEF14 | 13351892 | 3.0643  | 6.7766 | -1.5936 |
| CHB | PRAMEF14 | 13356892 | 2.7938  | 5.9295 | -1.518  |
| CHB | PRAMEF14 | 13361892 | 1.2142  | 1.0165 | 0.3934  |
| CHB | PRAMEF14 | 13366892 | 1.4748  | 0.8471 | 1.4155  |
| CHB | PRAMEF14 | 13371892 | 3.0057  | 1.5247 | 2.2002  |
| CHB | PRAMEF14 | 13376892 | 8.8923  | 5.7601 | 1.5561  |
| CHB | PRAMEF14 | 13381892 | 12.7403 | 9.6567 | 0.9562  |
| CHB | PRAMEF14 | 13386892 | 6.5642  | 5.2519 | 0.7078  |
| CHB | PRAMEF14 | 13391892 | 0       | 0      | 0       |
| CHB | PRAMEF14 | 13396892 | 0       | 0      | 0       |
| CHB | PRAMEF14 | 13401892 | 0       | 0      | 0       |
| CHB | PRAMEF14 | 13406892 | 0       | 0      | 0       |
| CHB | PRAMEF14 | 13411892 | 3.276   | 2.5412 | 0.7338  |
| CHB | PRAMEF14 | 13416892 | 3.276   | 2.5412 | 0.7338  |
| CHB | PRAMEF14 | 13421892 | 0.8094  | 0.3388 | 1.8877  |
| CHB | PRAMEF14 | 13426892 | 1.2378  | 0.5082 | 2.2903  |
| CHB | PRAMEF14 | 13431892 | 0.4283  | 0.1694 | 1.5384  |
| CHB | PRAMEF14 | 13436892 | 0       | 0      | 0       |
| CHB | PRAMEF14 | 13441892 | 0       | 0      | 0       |
| CHB | PRAMEF14 | 13446892 | 1.0632  | 1.1859 | -0.219  |
| CHB | PRAMEF14 | 13451892 | 2.0701  | 1.8636 | 0.2635  |
| CHB | PRAMEF14 | 13456892 | 1.0069  | 0.6777 | 0.8606  |
| CHB | PRAMEF14 | 13461892 | 1.7419  | 1.1859 | 0.9925  |
| CHB | PRAMEF14 | 13466892 | 2.1256  | 1.5247 | 0.8927  |
| CHB | PRAMEF14 | 13471892 | 2.6895  | 1.6942 | 1.3659  |
| CHB | PRAMEF14 | 13476892 | 5.6227  | 2.8801 | 2.4728  |
| CHB | PRAMEF14 | 13481892 | 7.7952  | 4.7436 | 1.8001  |
| CHB | PRAMEF14 | 13486892 | 8.3621  | 5.9295 | 1.1777  |
| CHB | PRAMEF14 | 13491892 | 4.1348  | 3.2189 | 0.753   |
| CHB | PRAMEF14 | 13496892 | 2.8235  | 2.5412 | 0.2819  |
| CHB | PRAMEF14 | 13501892 | 3.4649  | 2.7106 | 0.7147  |
| CHB | PRAMEF14 | 13506892 | 0.8923  | 0.6777 | 0.561   |
| CHB | PRAMEF14 | 13511892 | 1.6196  | 1.0165 | 1.2002  |
| CHB | PRAMEF14 | 13516892 | 2.2886  | 3.2189 | -0.7648 |
| CHB | PRAMEF14 | 13521892 | 0.6787  | 2.3718 | -1.7872 |

## 2\_TajimasD\_data

|     |          |          |        |        |         |
|-----|----------|----------|--------|--------|---------|
| CHB | PRAMEF14 | 13526892 | 0.0097 | 0.1694 | -0.949  |
| CHB | PRAMEF14 | 13531892 | 1.6981 | 1.1859 | 0.9143  |
| CHB | PRAMEF14 | 13536892 | 1.6981 | 1.1859 | 0.9143  |
| CHB | PRAMEF14 | 13541892 | 0.3762 | 0.3388 | 0.15    |
| CHB | PRAMEF14 | 13546892 | 0.6155 | 0.8471 | -0.5223 |
| CHB | PRAMEF14 | 13551892 | 0.9235 | 1.5247 | -0.8932 |
| CHB | PRAMEF14 | 13556892 | 0.6842 | 1.0165 | -0.6613 |
| CHB | PRAMEF14 | 13561892 | 0      | 0      | 0       |
| CHB | PRAMEF14 | 13566892 | 0      | 0      | 0       |
| CHB | PRAMEF14 | 13571892 | 0      | 0      | 0       |
| CHB | PRAMEF14 | 13576892 | 0      | 0      | 0       |
| CHB | PRAMEF14 | 13581892 | 0      | 0      | 0       |
| CHB | PRAMEF14 | 13586892 | 0      | 0      | 0       |
| CHB | PRAMEF14 | 13591892 | 0      | 0      | 0       |
| CHB | PRAMEF14 | 13596892 | 0      | 0      | 0       |
| CHB | PRAMEF14 | 13601892 | 0      | 0      | 0       |
| CHB | PRAMEF14 | 13606892 | 0      | 0      | 0       |
| CHB | PRAMEF14 | 13611892 | 0      | 0      | 0       |
| CHB | PRAMEF14 | 13616892 | 0      | 0      | 0       |
| CHB | PRAMEF14 | 13621892 | 0      | 0      | 0       |
| CHB | PRAMEF14 | 13626892 | 0      | 0      | 0       |
| CHB | PRAMEF14 | 13631892 | 0.9098 | 2.5412 | -1.6291 |
| CHB | PRAMEF14 | 13636892 | 1.6926 | 2.8801 | -1.0707 |
| CHB | PRAMEF14 | 13641892 | 0.9018 | 0.5082 | 1.2356  |
| CHB | PRAMEF14 | 13646892 | 0.119  | 0.1694 | -0.2995 |
| CHB | PRAMEF14 | 13651892 | 0.0097 | 0.1694 | -0.949  |
| CHB | PRAMEF14 | 13656892 | 0.0097 | 0.1694 | -0.949  |
| CHB | PRAMEF14 | 13661892 | 0      | 0      | 0       |
| CHB | PRAMEF14 | 13666892 | 1.3333 | 1.1859 | 0.2631  |
| CHB | PRAMEF14 | 13671892 | 1.4099 | 1.5247 | -0.1706 |
| CHB | PRAMEF14 | 13676892 | 0.0765 | 0.3388 | -1.0522 |
| CHB | PRAMEF14 | 13681892 | 0      | 0      | 0       |
| CHB | PRAMEF14 | 13686892 | 0.189  | 0.6777 | -1.2776 |
| CHB | PRAMEF14 | 13691892 | 0.7036 | 2.8801 | -1.9624 |
| CHB | PRAMEF14 | 13696892 | 0.5146 | 2.2024 | -1.8899 |
| CHB | PRAMEF14 | 13701892 | 2.9412 | 2.8801 | 0.0551  |
| CHB | PRAMEF14 | 13706892 | 4.0272 | 3.8965 | 0.0914  |
| CHB | PRAMEF14 | 13711892 | 2.201  | 2.7106 | -0.4829 |
| CHB | PRAMEF14 | 13716892 | 3.2077 | 4.913  | -0.9754 |
| CHB | PRAMEF14 | 13721892 | 2.5334 | 4.2354 | -1.108  |
| CHB | PRAMEF14 | 13726892 | 0.4504 | 1.1859 | -1.3129 |
| CHB | PRAMEF14 | 13731892 | 2.1409 | 1.6942 | 0.613   |
| CHB | PRAMEF14 | 13736892 | 2.8816 | 2.2024 | 0.7605  |
| CHB | PRAMEF14 | 13741892 | 0.7893 | 1.3553 | -0.9173 |
| CHB | PRAMEF14 | 13746892 | 0.0388 | 0.6777 | -1.6703 |
| CHB | PRAMEF14 | 13751892 | 0      | 0      | 0       |
| CHB | PRAMEF14 | 13756892 | 0      | 0      | 0       |
| CHB | PRAMEF14 | 13761892 | 0      | 0      | 0       |
| CHB | PRAMEF14 | 13766892 | 0.5654 | 0.5082 | 0.1796  |

## 2\_TajimasD\_data

|     |          |          |         |         |         |
|-----|----------|----------|---------|---------|---------|
| CHB | PRAMEF14 | 13771892 | 4.8905  | 3.2189  | 1.3743  |
| CHB | PRAMEF14 | 13776892 | 7.0356  | 4.2354  | 1.8229  |
| CHB | PRAMEF14 | 13781892 | 17.9402 | 10.6731 | 2.0525  |
| CHB | PRAMEF14 | 13786892 | 23.6048 | 16.0944 | 1.4382  |
| CHB | PRAMEF14 | 13791892 | 20.7575 | 16.0944 | 0.8929  |
| CHB | PRAMEF14 | 13796892 | 17.9111 | 13.7226 | 0.9335  |
| CHB | PRAMEF14 | 13801892 | 12.9589 | 9.9955  | 0.8899  |
| CHB | PRAMEF14 | 13806892 | 15.0343 | 12.8755 | 0.5111  |
| CHB | PRAMEF14 | 13811892 | 14.8547 | 15.4168 | -0.1121 |
| CHB | PRAMEF14 | 13816892 | 16.0746 | 14.9085 | 0.2402  |
| CHB | PRAMEF14 | 13821892 | 19.9111 | 15.4168 | 0.8967  |
| CHB | PRAMEF14 | 13826892 | 19.2397 | 17.1109 | 0.3844  |
| CHB | PRAMEF14 | 13831892 | 14.3697 | 17.2803 | -0.5207 |
| CHB | PRAMEF14 | 13836892 | 12.2214 | 13.7226 | -0.3346 |
| CHB | PRAMEF14 | 13841892 | 12.9587 | 12.5367 | 0.1025  |
| YRI | PRAMEF14 | 12846892 | 12.67   | 16.6382 | -0.7336 |
| YRI | PRAMEF14 | 12851892 | 16.4846 | 19.9994 | -0.5446 |
| YRI | PRAMEF14 | 12856892 | 18.9731 | 20.8397 | -0.278  |
| YRI | PRAMEF14 | 12861892 | 15.899  | 16.6382 | -0.1367 |
| YRI | PRAMEF14 | 12866892 | 11.4674 | 13.7811 | -0.5119 |
| YRI | PRAMEF14 | 12871892 | 13.0186 | 15.4617 | -0.4844 |
| YRI | PRAMEF14 | 12876892 | 16.7236 | 17.8146 | -0.1889 |
| YRI | PRAMEF14 | 12881892 | 22.5697 | 23.3606 | -0.1055 |
| YRI | PRAMEF14 | 12886892 | 26.0323 | 30.9234 | -0.4966 |
| YRI | PRAMEF14 | 12891892 | 22.287  | 27.8983 | -0.6298 |
| YRI | PRAMEF14 | 12896892 | 24.2507 | 35.125  | -0.9748 |
| YRI | PRAMEF14 | 12901892 | 19.8177 | 32.9402 | -1.2525 |
| YRI | PRAMEF14 | 12906892 | 14.2363 | 23.6968 | -1.2442 |
| YRI | PRAMEF14 | 12911892 | 16.2253 | 28.4025 | -1.3431 |
| YRI | PRAMEF14 | 12916892 | 23.5587 | 29.747  | -0.6525 |
| YRI | PRAMEF14 | 12921892 | 23.6077 | 25.0413 | -0.1787 |
| YRI | PRAMEF14 | 12926892 | 10.8535 | 14.2853 | -0.7338 |
| YRI | PRAMEF14 | 12931892 | 9.4636  | 13.613  | -0.9287 |
| YRI | PRAMEF14 | 12936892 | 15.8817 | 22.8565 | -0.9499 |
| YRI | PRAMEF14 | 12941892 | 22.9952 | 30.9234 | -0.8049 |
| YRI | PRAMEF14 | 12946892 | 17.5382 | 26.2177 | -1.0348 |
| YRI | PRAMEF14 | 12951892 | 7.7876  | 16.6382 | -1.6363 |
| YRI | PRAMEF14 | 12956892 | 5.8312  | 11.5963 | -1.5013 |
| YRI | PRAMEF14 | 12961892 | 3.545   | 6.3864  | -1.2824 |
| YRI | PRAMEF14 | 12966892 | 2.0617  | 4.0335  | -1.3341 |
| YRI | PRAMEF14 | 12971892 | 1.6494  | 3.5293  | -1.4254 |
| YRI | PRAMEF14 | 12976892 | 1.387   | 2.1848  | -0.8958 |
| YRI | PRAMEF14 | 12981892 | 4.0235  | 6.3864  | -1.0664 |
| YRI | PRAMEF14 | 12986892 | 4.875   | 8.067   | -1.1648 |
| YRI | PRAMEF14 | 12991892 | 6.2555  | 5.7141  | 0.27    |
| YRI | PRAMEF14 | 12996892 | 8.5124  | 7.0586  | 0.5993  |
| YRI | PRAMEF14 | 13001892 | 4.295   | 4.7057  | -0.2431 |
| YRI | PRAMEF14 | 13006892 | 2.0357  | 2.5209  | -0.4859 |
| YRI | PRAMEF14 | 13011892 | 6.6443  | 6.5544  | 0.0396  |

## 2\_TajimasD\_data

|     |          |          |         |         |         |
|-----|----------|----------|---------|---------|---------|
| YRI | PRAMEF14 | 13016892 | 5.6171  | 4.8738  | 0.4267  |
| YRI | PRAMEF14 | 13021892 | 1.075   | 0.8403  | 0.5301  |
| YRI | PRAMEF14 | 13026892 | 0.3242  | 0.8403  | -1.1657 |
| YRI | PRAMEF14 | 13031892 | 0.6207  | 1.3445  | -1.1756 |
| YRI | PRAMEF14 | 13036892 | 3.0844  | 4.0335  | -0.6422 |
| YRI | PRAMEF14 | 13041892 | 2.9458  | 4.3696  | -0.899  |
| YRI | PRAMEF14 | 13046892 | 5.4225  | 13.7811 | -1.8492 |
| YRI | PRAMEF14 | 13051892 | 6.3683  | 14.1172 | -1.6755 |
| YRI | PRAMEF14 | 13056892 | 1.2878  | 1.5126  | -0.3347 |
| YRI | PRAMEF14 | 13061892 | 0       | 0       | 0       |
| YRI | PRAMEF14 | 13066892 | 0       | 0       | 0       |
| YRI | PRAMEF14 | 13071892 | 0       | 0       | 0       |
| YRI | PRAMEF14 | 13076892 | 0       | 0       | 0       |
| YRI | PRAMEF14 | 13081892 | 0       | 0       | 0       |
| YRI | PRAMEF14 | 13086892 | 0       | 0       | 0       |
| YRI | PRAMEF14 | 13091892 | 0       | 0       | 0       |
| YRI | PRAMEF14 | 13096892 | 0       | 0       | 0       |
| YRI | PRAMEF14 | 13101892 | 0       | 0       | 0       |
| YRI | PRAMEF14 | 13106892 | 1.6795  | 1.8487  | -0.2164 |
| YRI | PRAMEF14 | 13111892 | 1.9676  | 2.3529  | -0.4079 |
| YRI | PRAMEF14 | 13116892 | 1.1242  | 2.5209  | -1.3987 |
| YRI | PRAMEF14 | 13121892 | 7.2873  | 9.2434  | -0.6295 |
| YRI | PRAMEF14 | 13126892 | 15.7143 | 15.6298 | 0.0166  |
| YRI | PRAMEF14 | 13131892 | 15.1641 | 13.2769 | 0.4325  |
| YRI | PRAMEF14 | 13136892 | 10.075  | 7.5628  | 0.9725  |
| YRI | PRAMEF14 | 13141892 | 6.4688  | 5.8822  | 0.285   |
| YRI | PRAMEF14 | 13146892 | 3.402   | 5.378   | -1.0399 |
| YRI | PRAMEF14 | 13151892 | 1.4259  | 2.689   | -1.2004 |
| YRI | PRAMEF14 | 13156892 | 1.3265  | 2.3529  | -1.0865 |
| YRI | PRAMEF14 | 13161892 | 1.9727  | 3.3612  | -1.097  |
| YRI | PRAMEF14 | 13166892 | 2.3498  | 2.5209  | -0.1713 |
| YRI | PRAMEF14 | 13171892 | 7.885   | 9.4115  | -0.4831 |
| YRI | PRAMEF14 | 13176892 | 15.5751 | 24.201  | -1.1115 |
| YRI | PRAMEF14 | 13181892 | 17.3213 | 27.2261 | -1.1384 |
| YRI | PRAMEF14 | 13186892 | 14.6301 | 17.9827 | -0.5753 |
| YRI | PRAMEF14 | 13191892 | 7.9383  | 7.8989  | 0.0147  |
| YRI | PRAMEF14 | 13196892 | 2.1996  | 3.8654  | -1.169  |
| YRI | PRAMEF14 | 13201892 | 3.9267  | 5.8822  | -0.9502 |
| YRI | PRAMEF14 | 13206892 | 4.0888  | 5.0419  | -0.531  |
| YRI | PRAMEF14 | 13211892 | 1.6918  | 4.0335  | -1.5844 |
| YRI | PRAMEF14 | 13216892 | 1.7767  | 4.2016  | -1.584  |
| YRI | PRAMEF14 | 13221892 | 0.7876  | 1.6806  | -1.2285 |
| YRI | PRAMEF14 | 13226892 | 0       | 0       | 0       |
| YRI | PRAMEF14 | 13231892 | 0       | 0       | 0       |
| YRI | PRAMEF14 | 13236892 | 0       | 0       | 0       |
| YRI | PRAMEF14 | 13241892 | 0       | 0       | 0       |
| YRI | PRAMEF14 | 13246892 | 0       | 0       | 0       |
| YRI | PRAMEF14 | 13251892 | 0       | 0       | 0       |
| YRI | PRAMEF14 | 13256892 | 0       | 0       | 0       |

## 2\_TajimasD\_data

|     |          |          |         |         |         |
|-----|----------|----------|---------|---------|---------|
| YRI | PRAMEF14 | 13261892 | 0       | 0       | 0       |
| YRI | PRAMEF14 | 13266892 | 0       | 0       | 0       |
| YRI | PRAMEF14 | 13271892 | 0       | 0       | 0       |
| YRI | PRAMEF14 | 13276892 | 0       | 0       | 0       |
| YRI | PRAMEF14 | 13281892 | 0       | 0       | 0       |
| YRI | PRAMEF14 | 13286892 | 0       | 0       | 0       |
| YRI | PRAMEF14 | 13291892 | 0       | 0       | 0       |
| YRI | PRAMEF14 | 13296892 | 0       | 0       | 0       |
| YRI | PRAMEF14 | 13301892 | 0       | 0       | 0       |
| YRI | PRAMEF14 | 13306892 | 0       | 0       | 0       |
| YRI | PRAMEF14 | 13311892 | 0       | 0       | 0       |
| YRI | PRAMEF14 | 13316892 | 0       | 0       | 0       |
| YRI | PRAMEF14 | 13321892 | 0.0093  | 0.1681  | -0.944  |
| YRI | PRAMEF14 | 13326892 | 1.4065  | 2.5209  | -1.116  |
| YRI | PRAMEF14 | 13331892 | 1.425   | 2.8571  | -1.2951 |
| YRI | PRAMEF14 | 13336892 | 0.0278  | 0.5042  | -1.4972 |
| YRI | PRAMEF14 | 13341892 | 0.5495  | 0.8403  | -0.6568 |
| YRI | PRAMEF14 | 13346892 | 1.9984  | 2.689   | -0.6563 |
| YRI | PRAMEF14 | 13351892 | 5.2291  | 9.0754  | -1.2591 |
| YRI | PRAMEF14 | 13356892 | 3.8624  | 7.5628  | -1.4325 |
| YRI | PRAMEF14 | 13361892 | 1.4682  | 1.3445  | 0.2009  |
| YRI | PRAMEF14 | 13366892 | 1.702   | 1.5126  | 0.282   |
| YRI | PRAMEF14 | 13371892 | 2.7487  | 4.0335  | -0.8693 |
| YRI | PRAMEF14 | 13376892 | 8.3256  | 9.4115  | -0.3437 |
| YRI | PRAMEF14 | 13381892 | 12.5596 | 12.1005 | 0.1149  |
| YRI | PRAMEF14 | 13386892 | 6.6668  | 6.2183  | 0.2073  |
| YRI | PRAMEF14 | 13391892 | 0       | 0       | 0       |
| YRI | PRAMEF14 | 13396892 | 0       | 0       | 0       |
| YRI | PRAMEF14 | 13401892 | 0       | 0       | 0       |
| YRI | PRAMEF14 | 13406892 | 0       | 0       | 0       |
| YRI | PRAMEF14 | 13411892 | 3.1168  | 2.5209  | 0.5968  |
| YRI | PRAMEF14 | 13416892 | 3.1168  | 2.5209  | 0.5968  |
| YRI | PRAMEF14 | 13421892 | 0.0996  | 0.3361  | -0.9494 |
| YRI | PRAMEF14 | 13426892 | 0.1449  | 0.5042  | -1.1292 |
| YRI | PRAMEF14 | 13431892 | 0.0453  | 0.1681  | -0.73   |
| YRI | PRAMEF14 | 13436892 | 0       | 0       | 0       |
| YRI | PRAMEF14 | 13441892 | 0       | 0       | 0       |
| YRI | PRAMEF14 | 13446892 | 2.6596  | 1.3445  | 2.136   |
| YRI | PRAMEF14 | 13451892 | 3.4117  | 2.0167  | 1.6679  |
| YRI | PRAMEF14 | 13456892 | 0.7522  | 0.6722  | 0.2094  |
| YRI | PRAMEF14 | 13461892 | 1.4245  | 1.1764  | 0.4437  |
| YRI | PRAMEF14 | 13466892 | 1.7736  | 1.8487  | -0.0961 |
| YRI | PRAMEF14 | 13471892 | 0.7586  | 2.3529  | -1.6876 |
| YRI | PRAMEF14 | 13476892 | 1.9987  | 3.0251  | -0.8854 |
| YRI | PRAMEF14 | 13481892 | 4.1096  | 5.2099  | -0.5956 |
| YRI | PRAMEF14 | 13486892 | 4.8068  | 6.5544  | -0.7705 |
| YRI | PRAMEF14 | 13491892 | 2.6964  | 3.3612  | -0.5252 |
| YRI | PRAMEF14 | 13496892 | 1.2334  | 3.3612  | -1.6811 |
| YRI | PRAMEF14 | 13501892 | 1.0151  | 3.6974  | -1.9551 |

## 2\_TajimasD\_data

|     |          |          |        |        |         |
|-----|----------|----------|--------|--------|---------|
| YRI | PRAMEF14 | 13506892 | 0.1917 | 1.0084 | -1.6282 |
| YRI | PRAMEF14 | 13511892 | 1.7858 | 2.0167 | -0.2761 |
| YRI | PRAMEF14 | 13516892 | 2.667  | 4.7057 | -1.2068 |
| YRI | PRAMEF14 | 13521892 | 1.1633 | 3.3612 | -1.7364 |
| YRI | PRAMEF14 | 13526892 | 0.2821 | 0.6722 | -1.0213 |
| YRI | PRAMEF14 | 13531892 | 2.5774 | 1.5126 | 1.5855  |
| YRI | PRAMEF14 | 13536892 | 2.5774 | 1.5126 | 1.5855  |
| YRI | PRAMEF14 | 13541892 | 0.5035 | 0.1681 | 1.9939  |
| YRI | PRAMEF14 | 13546892 | 1.0657 | 0.8403 | 0.5091  |
| YRI | PRAMEF14 | 13551892 | 1.3837 | 1.8487 | -0.5948 |
| YRI | PRAMEF14 | 13556892 | 0.8216 | 1.1764 | -0.6346 |
| YRI | PRAMEF14 | 13561892 | 0      | 0      | 0       |
| YRI | PRAMEF14 | 13566892 | 0      | 0      | 0       |
| YRI | PRAMEF14 | 13571892 | 0      | 0      | 0       |
| YRI | PRAMEF14 | 13576892 | 0      | 0      | 0       |
| YRI | PRAMEF14 | 13581892 | 0      | 0      | 0       |
| YRI | PRAMEF14 | 13586892 | 0      | 0      | 0       |
| YRI | PRAMEF14 | 13591892 | 0      | 0      | 0       |
| YRI | PRAMEF14 | 13596892 | 0      | 0      | 0       |
| YRI | PRAMEF14 | 13601892 | 0      | 0      | 0       |
| YRI | PRAMEF14 | 13606892 | 0      | 0      | 0       |
| YRI | PRAMEF14 | 13611892 | 0      | 0      | 0       |
| YRI | PRAMEF14 | 13616892 | 0      | 0      | 0       |
| YRI | PRAMEF14 | 13621892 | 0      | 0      | 0       |
| YRI | PRAMEF14 | 13626892 | 0      | 0      | 0       |
| YRI | PRAMEF14 | 13631892 | 1.1751 | 2.1848 | -1.1337 |
| YRI | PRAMEF14 | 13636892 | 1.3451 | 2.8571 | -1.3674 |
| YRI | PRAMEF14 | 13641892 | 0.3345 | 1.1764 | -1.5058 |
| YRI | PRAMEF14 | 13646892 | 0.1645 | 0.5042 | -1.0676 |
| YRI | PRAMEF14 | 13651892 | 0.0276 | 0.1681 | -0.8352 |
| YRI | PRAMEF14 | 13656892 | 0.0276 | 0.1681 | -0.8352 |
| YRI | PRAMEF14 | 13661892 | 0      | 0      | 0       |
| YRI | PRAMEF14 | 13666892 | 1.6047 | 2.3529 | -0.792  |
| YRI | PRAMEF14 | 13671892 | 1.7055 | 3.1932 | -1.2269 |
| YRI | PRAMEF14 | 13676892 | 0.1008 | 0.8403 | -1.6703 |
| YRI | PRAMEF14 | 13681892 | 0      | 0      | 0       |
| YRI | PRAMEF14 | 13686892 | 1.1727 | 0.8403 | 0.7508  |
| YRI | PRAMEF14 | 13691892 | 1.5428 | 3.0251 | -1.2787 |
| YRI | PRAMEF14 | 13696892 | 0.3701 | 2.1848 | -2.0375 |
| YRI | PRAMEF14 | 13701892 | 2.8191 | 3.6974 | -0.6402 |
| YRI | PRAMEF14 | 13706892 | 4.099  | 5.7141 | -0.8054 |
| YRI | PRAMEF14 | 13711892 | 2.4804 | 4.3696 | -1.1929 |
| YRI | PRAMEF14 | 13716892 | 3.3979 | 5.0419 | -0.916  |
| YRI | PRAMEF14 | 13721892 | 2.721  | 4.0335 | -0.8881 |
| YRI | PRAMEF14 | 13726892 | 0.5874 | 1.6806 | -1.5039 |
| YRI | PRAMEF14 | 13731892 | 3.3082 | 3.3612 | -0.0419 |
| YRI | PRAMEF14 | 13736892 | 4.2812 | 3.5293 | 0.5701  |
| YRI | PRAMEF14 | 13741892 | 1.165  | 1.3445 | -0.2915 |
| YRI | PRAMEF14 | 13746892 | 0.1282 | 0.8403 | -1.6084 |



## 2\_TajimasD\_data

|     |          |          |         |         |         |
|-----|----------|----------|---------|---------|---------|
| YRI | PRAMEF14 | 13751892 | 0       | 0       | 0       |
| YRI | PRAMEF14 | 13756892 | 0       | 0       | 0       |
| YRI | PRAMEF14 | 13761892 | 0       | 0       | 0       |
| YRI | PRAMEF14 | 13766892 | 1.413   | 1.0084  | 0.8066  |
| YRI | PRAMEF14 | 13771892 | 4.5626  | 6.3864  | -0.8231 |
| YRI | PRAMEF14 | 13776892 | 6.3097  | 9.4115  | -0.9817 |
| YRI | PRAMEF14 | 13781892 | 17.456  | 15.1256 | 0.4719  |
| YRI | PRAMEF14 | 13786892 | 22.3996 | 19.4952 | 0.4612  |
| YRI | PRAMEF14 | 13791892 | 21.2839 | 19.8313 | 0.2269  |
| YRI | PRAMEF14 | 13796892 | 20.562  | 20.6717 | -0.0165 |
| YRI | PRAMEF14 | 13801892 | 12.6932 | 16.4701 | -0.7051 |
| YRI | PRAMEF14 | 13806892 | 11.8301 | 20.1675 | -1.2814 |
| YRI | PRAMEF14 | 13811892 | 18.0805 | 23.5287 | -0.7215 |
| YRI | PRAMEF14 | 13816892 | 20.8904 | 19.8313 | 0.1654  |
| YRI | PRAMEF14 | 13821892 | 21.9111 | 20.3355 | 0.2402  |
| YRI | PRAMEF14 | 13826892 | 23.1641 | 22.6884 | 0.0653  |
| YRI | PRAMEF14 | 13831892 | 17.9637 | 20.3355 | -0.3616 |
| YRI | PRAMEF14 | 13836892 | 13.4068 | 16.6382 | -0.5974 |
| YRI | PRAMEF14 | 13841892 | 12.999  | 16.302  | -0.6227 |
| CEU | PRAMEF20 | 12915450 | 18.0081 | 25.2432 | -0.9005 |
| CEU | PRAMEF20 | 12920450 | 20.2049 | 26.7783 | -0.7725 |
| CEU | PRAMEF20 | 12925450 | 10.8439 | 15.3506 | -0.9055 |
| CEU | PRAMEF20 | 12930450 | 6.7374  | 7.5047  | -0.3011 |
| CEU | PRAMEF20 | 12935450 | 7.7077  | 9.0398  | -0.4404 |
| CEU | PRAMEF20 | 12940450 | 14.8041 | 16.8857 | -0.3818 |
| CEU | PRAMEF20 | 12945450 | 14.9411 | 16.0329 | -0.2104 |
| CEU | PRAMEF20 | 12950450 | 7.1377  | 11.4277 | -1.1398 |
| CEU | PRAMEF20 | 12955450 | 3.7916  | 7.8459  | -1.5273 |
| CEU | PRAMEF20 | 12960450 | 3.0066  | 3.0701  | -0.0545 |
| CEU | PRAMEF20 | 12965450 | 2.9645  | 2.5584  | 0.4045  |
| CEU | PRAMEF20 | 12970450 | 0.4477  | 0.5117  | -0.2007 |
| CEU | PRAMEF20 | 12975450 | 0.4193  | 0.6822  | -0.6865 |
| CEU | PRAMEF20 | 12980450 | 2.3067  | 4.6052  | -1.3955 |
| CEU | PRAMEF20 | 12985450 | 3.6627  | 6.6519  | -1.3087 |
| CEU | PRAMEF20 | 12990450 | 3.409   | 6.1402  | -1.2852 |
| CEU | PRAMEF20 | 12995450 | 2.8194  | 5.458   | -1.3794 |
| CEU | PRAMEF20 | 13000450 | 2.5073  | 4.0935  | -1.0666 |
| CEU | PRAMEF20 | 13005450 | 2.5485  | 3.7524  | -0.8722 |
| CEU | PRAMEF20 | 13010450 | 4.5261  | 5.1169  | -0.327  |
| CEU | PRAMEF20 | 13015450 | 3.7485  | 5.2874  | -0.8275 |
| CEU | PRAMEF20 | 13020450 | 0.6685  | 2.729   | -1.9476 |
| CEU | PRAMEF20 | 13025450 | 0.2292  | 1.0234  | -1.5781 |
| CEU | PRAMEF20 | 13030450 | 0.0101  | 0.1706  | -0.9534 |
| CEU | PRAMEF20 | 13035450 | 3.1293  | 1.8762  | 1.5954  |
| CEU | PRAMEF20 | 13040450 | 3.7852  | 2.3879  | 1.4715  |
| CEU | PRAMEF20 | 13045450 | 4.1692  | 5.458   | -0.6738 |
| CEU | PRAMEF20 | 13050450 | 5.8868  | 8.187   | -0.8333 |
| CEU | PRAMEF20 | 13055450 | 2.3735  | 3.2407  | -0.7111 |
| CEU | PRAMEF20 | 13060450 | 0       | 0       | 0       |

## 2\_TajimasD\_data

|     |          |          |         |         |         |
|-----|----------|----------|---------|---------|---------|
| CEU | PRAMEF20 | 13065450 | 0       | 0       | 0       |
| CEU | PRAMEF20 | 13070450 | 0       | 0       | 0       |
| CEU | PRAMEF20 | 13075450 | 0       | 0       | 0       |
| CEU | PRAMEF20 | 13080450 | 0       | 0       | 0       |
| CEU | PRAMEF20 | 13085450 | 0       | 0       | 0       |
| CEU | PRAMEF20 | 13090450 | 0       | 0       | 0       |
| CEU | PRAMEF20 | 13095450 | 0       | 0       | 0       |
| CEU | PRAMEF20 | 13100450 | 0       | 0       | 0       |
| CEU | PRAMEF20 | 13105450 | 0.5543  | 0.6822  | -0.334  |
| CEU | PRAMEF20 | 13110450 | 1.242   | 1.1939  | 0.0857  |
| CEU | PRAMEF20 | 13115450 | 1.2542  | 2.0467  | -0.943  |
| CEU | PRAMEF20 | 13120450 | 4.9577  | 6.9931  | -0.8516 |
| CEU | PRAMEF20 | 13125450 | 12.5364 | 16.2034 | -0.6997 |
| CEU | PRAMEF20 | 13130450 | 13.6489 | 14.6684 | -0.2139 |
| CEU | PRAMEF20 | 13135450 | 8.2678  | 5.6286  | 1.3425  |
| CEU | PRAMEF20 | 13140450 | 5.4212  | 4.4346  | 0.619   |
| CEU | PRAMEF20 | 13145450 | 3.6652  | 4.9463  | -0.7306 |
| CEU | PRAMEF20 | 13150450 | 1.223   | 3.0701  | -1.5844 |
| CEU | PRAMEF20 | 13155450 | 1.4665  | 2.5584  | -1.0877 |
| CEU | PRAMEF20 | 13160450 | 1.4881  | 2.5584  | -1.0662 |
| CEU | PRAMEF20 | 13165450 | 1.3123  | 1.7056  | -0.5387 |
| CEU | PRAMEF20 | 13170450 | 5.3946  | 6.4814  | -0.4871 |
| CEU | PRAMEF20 | 13175450 | 11.8029 | 15.5212 | -0.7392 |
| CEU | PRAMEF20 | 13180450 | 16.269  | 19.7852 | -0.5539 |
| CEU | PRAMEF20 | 13185450 | 16.8386 | 16.374  | 0.0878  |
| CEU | PRAMEF20 | 13190450 | 8.283   | 7.1636  | 0.4582  |
| CEU | PRAMEF20 | 13195450 | 0.8992  | 2.0467  | -1.3654 |
| CEU | PRAMEF20 | 13200450 | 2.5242  | 3.2407  | -0.5875 |
| CEU | PRAMEF20 | 13205450 | 2.121   | 2.2173  | -0.1076 |
| CEU | PRAMEF20 | 13210450 | 1.2703  | 1.8762  | -0.7714 |
| CEU | PRAMEF20 | 13215450 | 1.6945  | 2.8996  | -1.0838 |
| CEU | PRAMEF20 | 13220450 | 0.6908  | 1.3645  | -1.0899 |
| CEU | PRAMEF20 | 13225450 | 0       | 0       | 0       |
| CEU | PRAMEF20 | 13230450 | 0       | 0       | 0       |
| CEU | PRAMEF20 | 13235450 | 0       | 0       | 0       |
| CEU | PRAMEF20 | 13240450 | 0       | 0       | 0       |
| CEU | PRAMEF20 | 13245450 | 0       | 0       | 0       |
| CEU | PRAMEF20 | 13250450 | 0       | 0       | 0       |
| CEU | PRAMEF20 | 13255450 | 0       | 0       | 0       |
| CEU | PRAMEF20 | 13260450 | 0       | 0       | 0       |
| CEU | PRAMEF20 | 13265450 | 0       | 0       | 0       |
| CEU | PRAMEF20 | 13270450 | 0       | 0       | 0       |
| CEU | PRAMEF20 | 13275450 | 0       | 0       | 0       |
| CEU | PRAMEF20 | 13280450 | 0       | 0       | 0       |
| CEU | PRAMEF20 | 13285450 | 0       | 0       | 0       |
| CEU | PRAMEF20 | 13290450 | 0       | 0       | 0       |
| CEU | PRAMEF20 | 13295450 | 0       | 0       | 0       |
| CEU | PRAMEF20 | 13300450 | 0       | 0       | 0       |
| CEU | PRAMEF20 | 13305450 | 0       | 0       | 0       |

## 2\_TajimasD\_data

|     |          |          |         |        |         |
|-----|----------|----------|---------|--------|---------|
| CEU | PRAMEF20 | 13310450 | 0       | 0      | 0       |
| CEU | PRAMEF20 | 13315450 | 0       | 0      | 0       |
| CEU | PRAMEF20 | 13320450 | 0       | 0      | 0       |
| CEU | PRAMEF20 | 13325450 | 0.5428  | 1.8762 | -1.6976 |
| CEU | PRAMEF20 | 13330450 | 0.6654  | 2.0467 | -1.6436 |
| CEU | PRAMEF20 | 13335450 | 0.1328  | 0.8528 | -1.6214 |
| CEU | PRAMEF20 | 13340450 | 0.0101  | 0.6822 | -1.7551 |
| CEU | PRAMEF20 | 13345450 | 1.032   | 1.5351 | -0.746  |
| CEU | PRAMEF20 | 13350450 | 4.6599  | 7.8459 | -1.2002 |
| CEU | PRAMEF20 | 13355450 | 3.8819  | 6.9931 | -1.3018 |
| CEU | PRAMEF20 | 13360450 | 0.254   | 0.6822 | -1.1182 |
| CEU | PRAMEF20 | 13365450 | 1.5366  | 1.0234 | 1.0198  |
| CEU | PRAMEF20 | 13370450 | 2.9761  | 1.7056 | 1.7401  |
| CEU | PRAMEF20 | 13375450 | 6.8322  | 3.2407 | 2.945   |
| CEU | PRAMEF20 | 13380450 | 14.8582 | 9.3809 | 1.7498  |
| CEU | PRAMEF20 | 13385450 | 10.1222 | 7.8459 | 0.8575  |
| CEU | PRAMEF20 | 13390450 | 0.6568  | 1.0234 | -0.7285 |
| CEU | PRAMEF20 | 13395450 | 0       | 0      | 0       |
| CEU | PRAMEF20 | 13400450 | 0       | 0      | 0       |
| CEU | PRAMEF20 | 13405450 | 0       | 0      | 0       |
| CEU | PRAMEF20 | 13410450 | 2.965   | 1.8762 | 1.3862  |
| CEU | PRAMEF20 | 13415450 | 2.965   | 1.8762 | 1.3862  |
| CEU | PRAMEF20 | 13420450 | 0.4877  | 0.3411 | 0.5877  |
| CEU | PRAMEF20 | 13425450 | 0.5659  | 0.5117 | 0.17    |
| CEU | PRAMEF20 | 13430450 | 0.0781  | 0.1706 | -0.5495 |
| CEU | PRAMEF20 | 13435450 | 0       | 0      | 0       |
| CEU | PRAMEF20 | 13440450 | 0       | 0      | 0       |
| CEU | PRAMEF20 | 13445450 | 1.3636  | 1.1939 | 0.3024  |
| CEU | PRAMEF20 | 13450450 | 1.3636  | 1.1939 | 0.3024  |
| CEU | PRAMEF20 | 13455450 | 0.6135  | 0.6822 | -0.1794 |
| CEU | PRAMEF20 | 13460450 | 0.6135  | 0.6822 | -0.1794 |
| CEU | PRAMEF20 | 13465450 | 1.9272  | 1.5351 | 0.5814  |
| CEU | PRAMEF20 | 13470450 | 2.4531  | 2.8996 | -0.4016 |
| CEU | PRAMEF20 | 13475450 | 0.5259  | 1.3645 | -1.3567 |
| CEU | PRAMEF20 | 13480450 | 4.786   | 3.7524 | 0.7488  |
| CEU | PRAMEF20 | 13485450 | 8.498   | 7.3342 | 0.4663  |
| CEU | PRAMEF20 | 13490450 | 3.9423  | 3.7524 | 0.1376  |
| CEU | PRAMEF20 | 13495450 | 2.1754  | 2.2173 | -0.0468 |
| CEU | PRAMEF20 | 13500450 | 2.8409  | 2.8996 | -0.0528 |
| CEU | PRAMEF20 | 13505450 | 1.1538  | 1.3645 | -0.3409 |
| CEU | PRAMEF20 | 13510450 | 1.2997  | 1.1939 | 0.1885  |
| CEU | PRAMEF20 | 13515450 | 2.8637  | 3.7524 | -0.6438 |
| CEU | PRAMEF20 | 13520450 | 1.8322  | 3.2407 | -1.1549 |
| CEU | PRAMEF20 | 13525450 | 0.0101  | 0.1706 | -0.9534 |
| CEU | PRAMEF20 | 13530450 | 0       | 0      | 0       |
| CEU | PRAMEF20 | 13535450 | 1.6549  | 1.3645 | 0.4698  |
| CEU | PRAMEF20 | 13540450 | 1.9553  | 1.5351 | 0.6231  |
| CEU | PRAMEF20 | 13545450 | 0.5931  | 0.3411 | 1.0102  |
| CEU | PRAMEF20 | 13550450 | 1.3418  | 0.8528 | 1.1012  |

## 2\_TajimasD\_data

|     |          |          |         |         |         |
|-----|----------|----------|---------|---------|---------|
| CEU | PRAMEF20 | 13555450 | 1.2243  | 0.8528  | 0.8366  |
| CEU | PRAMEF20 | 13560450 | 0.1752  | 0.1706  | 0.0273  |
| CEU | PRAMEF20 | 13565450 | 0       | 0       | 0       |
| CEU | PRAMEF20 | 13570450 | 0       | 0       | 0       |
| CEU | PRAMEF20 | 13575450 | 0       | 0       | 0       |
| CEU | PRAMEF20 | 13580450 | 0       | 0       | 0       |
| CEU | PRAMEF20 | 13585450 | 0       | 0       | 0       |
| CEU | PRAMEF20 | 13590450 | 0       | 0       | 0       |
| CEU | PRAMEF20 | 13595450 | 0       | 0       | 0       |
| CEU | PRAMEF20 | 13600450 | 0       | 0       | 0       |
| CEU | PRAMEF20 | 13605450 | 0       | 0       | 0       |
| CEU | PRAMEF20 | 13610450 | 0       | 0       | 0       |
| CEU | PRAMEF20 | 13615450 | 0       | 0       | 0       |
| CEU | PRAMEF20 | 13620450 | 0       | 0       | 0       |
| CEU | PRAMEF20 | 13625450 | 0       | 0       | 0       |
| CEU | PRAMEF20 | 13630450 | 1.4345  | 3.0701  | -1.403  |
| CEU | PRAMEF20 | 13635450 | 1.4345  | 3.0701  | -1.403  |
| CEU | PRAMEF20 | 13640450 | 0.1734  | 0.3411  | -0.6723 |
| CEU | PRAMEF20 | 13645450 | 0.1934  | 0.5117  | -0.9983 |
| CEU | PRAMEF20 | 13650450 | 0.0301  | 0.3411  | -1.2467 |
| CEU | PRAMEF20 | 13655450 | 0.0202  | 0.3411  | -1.2864 |
| CEU | PRAMEF20 | 13660450 | 0.0101  | 0.1706  | -0.9534 |
| CEU | PRAMEF20 | 13665450 | 1.5242  | 0.6822  | 2.1987  |
| CEU | PRAMEF20 | 13670450 | 1.5242  | 0.6822  | 2.1987  |
| CEU | PRAMEF20 | 13675450 | 0.0994  | 0.3411  | -0.9689 |
| CEU | PRAMEF20 | 13680450 | 0.0994  | 0.3411  | -0.9689 |
| CEU | PRAMEF20 | 13685450 | 0.1769  | 0.6822  | -1.3195 |
| CEU | PRAMEF20 | 13690450 | 0.1769  | 0.6822  | -1.3195 |
| CEU | PRAMEF20 | 13695450 | 0.86    | 2.2173  | -1.5164 |
| CEU | PRAMEF20 | 13700450 | 2.9287  | 4.7757  | -1.0863 |
| CEU | PRAMEF20 | 13705450 | 3.7291  | 4.6052  | -0.5319 |
| CEU | PRAMEF20 | 13710450 | 2.142   | 2.2173  | -0.0841 |
| CEU | PRAMEF20 | 13715450 | 2.2375  | 3.4112  | -0.9218 |
| CEU | PRAMEF20 | 13720450 | 3.08    | 4.4346  | -0.8499 |
| CEU | PRAMEF20 | 13725450 | 1.3342  | 1.3645  | -0.049  |
| CEU | PRAMEF20 | 13730450 | 1.9002  | 1.3645  | 0.8666  |
| CEU | PRAMEF20 | 13735450 | 2.6024  | 1.7056  | 1.2283  |
| CEU | PRAMEF20 | 13740450 | 1.5001  | 1.3645  | 0.2194  |
| CEU | PRAMEF20 | 13745450 | 0.7879  | 0.8528  | -0.1462 |
| CEU | PRAMEF20 | 13750450 | 0       | 0       | 0       |
| CEU | PRAMEF20 | 13755450 | 0       | 0       | 0       |
| CEU | PRAMEF20 | 13760450 | 0       | 0       | 0       |
| CEU | PRAMEF20 | 13765450 | 0.4354  | 0.6822  | -0.6445 |
| CEU | PRAMEF20 | 13770450 | 1.6399  | 2.8996  | -1.1329 |
| CEU | PRAMEF20 | 13775450 | 3.3484  | 4.2641  | -0.5944 |
| CEU | PRAMEF20 | 13780450 | 14.6836 | 10.2337 | 1.311   |
| CEU | PRAMEF20 | 13785450 | 18.9701 | 13.8156 | 1.1448  |
| CEU | PRAMEF20 | 13790450 | 18.1604 | 13.3039 | 1.1179  |
| CEU | PRAMEF20 | 13795450 | 18.4061 | 13.645  | 1.0699  |

## 2\_TajimasD\_data

|     |          |          |         |         |         |
|-----|----------|----------|---------|---------|---------|
| CEU | PRAMEF20 | 13800450 | 11.5168 | 10.2337 | 0.378   |
| CEU | PRAMEF20 | 13805450 | 13.5541 | 13.1333 | 0.0981  |
| CEU | PRAMEF20 | 13810450 | 12.578  | 13.1333 | -0.1294 |
| CEU | PRAMEF20 | 13815450 | 10.7813 | 9.2104  | 0.5105  |
| CEU | PRAMEF20 | 13820450 | 17.9949 | 14.1567 | 0.8329  |
| CEU | PRAMEF20 | 13825450 | 15.6058 | 14.8389 | 0.1591  |
| CEU | PRAMEF20 | 13830450 | 11.8132 | 13.3039 | -0.3431 |
| CEU | PRAMEF20 | 13835450 | 11.8687 | 11.4277 | 0.1172  |
| CEU | PRAMEF20 | 13840450 | 12.3539 | 10.5749 | 0.5083  |
| CEU | PRAMEF20 | 13845450 | 12.9188 | 11.4277 | 0.3962  |
| CEU | PRAMEF20 | 13850450 | 15.4937 | 12.1099 | 0.8513  |
| CEU | PRAMEF20 | 13855450 | 18.134  | 15.0095 | 0.6413  |
| CEU | PRAMEF20 | 13860450 | 12.1909 | 13.8156 | -0.3608 |
| CEU | PRAMEF20 | 13865450 | 11.3948 | 11.7688 | -0.0967 |
| CEU | PRAMEF20 | 13870450 | 19.9942 | 15.8623 | 0.8046  |
| CEU | PRAMEF20 | 13875450 | 15.6349 | 14.4978 | 0.2412  |
| CEU | PRAMEF20 | 13880450 | 8.9546  | 9.7221  | -0.2372 |
| CEU | PRAMEF20 | 13885450 | 14.8477 | 12.4511 | 0.5873  |
| CEU | PRAMEF20 | 13890450 | 15.7747 | 14.6684 | 0.2321  |
| CEU | PRAMEF20 | 13895450 | 13.0703 | 13.645  | -0.1292 |
| CEU | PRAMEF20 | 13900450 | 13.3591 | 11.5982 | 0.4614  |
| CEU | PRAMEF20 | 13905450 | 15.8625 | 10.7454 | 1.4403  |
| CEU | PRAMEF20 | 13910450 | 12.67   | 9.3809  | 1.0507  |
| CEU | PRAMEF20 | 13915450 | 10.8114 | 9.5515  | 0.3958  |
| CHB | PRAMEF20 | 12915450 | 34.1526 | 26.0899 | 0.9691  |
| CHB | PRAMEF20 | 12920450 | 26.6366 | 24.904  | 0.2179  |
| CHB | PRAMEF20 | 12925450 | 13.7356 | 14.2309 | -0.1066 |
| CHB | PRAMEF20 | 12930450 | 7.2873  | 7.4543  | -0.0657 |
| CHB | PRAMEF20 | 12935450 | 7.4755  | 8.6402  | -0.4003 |
| CHB | PRAMEF20 | 12940450 | 13.2703 | 19.991  | -1.0452 |
| CHB | PRAMEF20 | 12945450 | 11.6212 | 18.9745 | -1.2025 |
| CHB | PRAMEF20 | 12950450 | 5.0126  | 12.7061 | -1.8443 |
| CHB | PRAMEF20 | 12955450 | 3.6006  | 9.1484  | -1.8088 |
| CHB | PRAMEF20 | 12960450 | 3.1957  | 3.5577  | -0.2736 |
| CHB | PRAMEF20 | 12965450 | 2.5248  | 3.5577  | -0.7806 |
| CHB | PRAMEF20 | 12970450 | 0.1645  | 2.2024  | -2.2819 |
| CHB | PRAMEF20 | 12975450 | 0.2477  | 1.8636  | -2.0617 |
| CHB | PRAMEF20 | 12980450 | 2.4896  | 5.4213  | -1.5373 |
| CHB | PRAMEF20 | 12985450 | 3.8765  | 5.9295  | -0.9939 |
| CHB | PRAMEF20 | 12990450 | 2.786   | 4.2354  | -0.9436 |
| CHB | PRAMEF20 | 12995450 | 1.7493  | 4.4048  | -1.671  |
| CHB | PRAMEF20 | 13000450 | 1.6893  | 4.066   | -1.6027 |
| CHB | PRAMEF20 | 13005450 | 2.0495  | 3.2189  | -0.9614 |
| CHB | PRAMEF20 | 13010450 | 3.1342  | 3.8965  | -0.5332 |
| CHB | PRAMEF20 | 13015450 | 2.4245  | 3.7271  | -0.9463 |
| CHB | PRAMEF20 | 13020450 | 0.3413  | 1.5247  | -1.7581 |
| CHB | PRAMEF20 | 13025450 | 0.1319  | 0.6777  | -1.4269 |
| CHB | PRAMEF20 | 13030450 | 0       | 0       | 0       |
| CHB | PRAMEF20 | 13035450 | 3.1711  | 2.3718  | 0.8437  |

## 2\_TajimasD\_data

|     |          |          |         |         |         |
|-----|----------|----------|---------|---------|---------|
| CHB | PRAMEF20 | 13040450 | 4.1017  | 2.7106  | 1.3181  |
| CHB | PRAMEF20 | 13045450 | 7.9115  | 6.0989  | 0.8556  |
| CHB | PRAMEF20 | 13050450 | 12.6674 | 10.3343 | 0.6791  |
| CHB | PRAMEF20 | 13055450 | 5.6865  | 4.5742  | 0.6773  |
| CHB | PRAMEF20 | 13060450 | 0       | 0       | 0       |
| CHB | PRAMEF20 | 13065450 | 0       | 0       | 0       |
| CHB | PRAMEF20 | 13070450 | 0       | 0       | 0       |
| CHB | PRAMEF20 | 13075450 | 0       | 0       | 0       |
| CHB | PRAMEF20 | 13080450 | 0       | 0       | 0       |
| CHB | PRAMEF20 | 13085450 | 0       | 0       | 0       |
| CHB | PRAMEF20 | 13090450 | 0       | 0       | 0       |
| CHB | PRAMEF20 | 13095450 | 0       | 0       | 0       |
| CHB | PRAMEF20 | 13100450 | 0       | 0       | 0       |
| CHB | PRAMEF20 | 13105450 | 0.4826  | 0.3388  | 0.5768  |
| CHB | PRAMEF20 | 13110450 | 1.2136  | 0.6777  | 1.401   |
| CHB | PRAMEF20 | 13115450 | 1.5555  | 0.6777  | 2.2948  |
| CHB | PRAMEF20 | 13120450 | 5.131   | 6.6072  | -0.6484 |
| CHB | PRAMEF20 | 13125450 | 9.0504  | 15.4168 | -1.2702 |
| CHB | PRAMEF20 | 13130450 | 9.5894  | 13.2144 | -0.8374 |
| CHB | PRAMEF20 | 13135450 | 7.264   | 6.0989  | 0.55    |
| CHB | PRAMEF20 | 13140450 | 5.7594  | 4.4048  | 0.8524  |
| CHB | PRAMEF20 | 13145450 | 7.5243  | 5.5907  | 0.9866  |
| CHB | PRAMEF20 | 13150450 | 4.8813  | 3.5577  | 1.0003  |
| CHB | PRAMEF20 | 13155450 | 1.8442  | 1.8636  | -0.0248 |
| CHB | PRAMEF20 | 13160450 | 1.3562  | 2.7106  | -1.2834 |
| CHB | PRAMEF20 | 13165450 | 1.0992  | 1.8636  | -0.9753 |
| CHB | PRAMEF20 | 13170450 | 6.1732  | 6.2684  | -0.0438 |
| CHB | PRAMEF20 | 13175450 | 21.3191 | 17.7886 | 0.6143  |
| CHB | PRAMEF20 | 13180450 | 31.2311 | 23.8875 | 0.9615  |
| CHB | PRAMEF20 | 13185450 | 23.7887 | 18.6357 | 0.8574  |
| CHB | PRAMEF20 | 13190450 | 8.7367  | 7.7931  | 0.3566  |
| CHB | PRAMEF20 | 13195450 | 1.5603  | 2.8801  | -1.1899 |
| CHB | PRAMEF20 | 13200450 | 2.9598  | 4.2354  | -0.8304 |
| CHB | PRAMEF20 | 13205450 | 1.6657  | 2.8801  | -1.0949 |
| CHB | PRAMEF20 | 13210450 | 1.3444  | 2.2024  | -0.9607 |
| CHB | PRAMEF20 | 13215450 | 2.6983  | 3.8965  | -0.838  |
| CHB | PRAMEF20 | 13220450 | 1.4761  | 2.3718  | -0.9455 |
| CHB | PRAMEF20 | 13225450 | 0       | 0       | 0       |
| CHB | PRAMEF20 | 13230450 | 0       | 0       | 0       |
| CHB | PRAMEF20 | 13235450 | 0       | 0       | 0       |
| CHB | PRAMEF20 | 13240450 | 0       | 0       | 0       |
| CHB | PRAMEF20 | 13245450 | 0       | 0       | 0       |
| CHB | PRAMEF20 | 13250450 | 0       | 0       | 0       |
| CHB | PRAMEF20 | 13255450 | 0       | 0       | 0       |
| CHB | PRAMEF20 | 13260450 | 0       | 0       | 0       |
| CHB | PRAMEF20 | 13265450 | 0       | 0       | 0       |
| CHB | PRAMEF20 | 13270450 | 0       | 0       | 0       |
| CHB | PRAMEF20 | 13275450 | 0       | 0       | 0       |
| CHB | PRAMEF20 | 13280450 | 0       | 0       | 0       |

## 2\_TajimasD\_data

|     |          |          |         |        |         |
|-----|----------|----------|---------|--------|---------|
| CHB | PRAMEF20 | 13285450 | 0       | 0      | 0       |
| CHB | PRAMEF20 | 13290450 | 0       | 0      | 0       |
| CHB | PRAMEF20 | 13295450 | 0       | 0      | 0       |
| CHB | PRAMEF20 | 13300450 | 0       | 0      | 0       |
| CHB | PRAMEF20 | 13305450 | 0       | 0      | 0       |
| CHB | PRAMEF20 | 13310450 | 0       | 0      | 0       |
| CHB | PRAMEF20 | 13315450 | 0       | 0      | 0       |
| CHB | PRAMEF20 | 13320450 | 0       | 0      | 0       |
| CHB | PRAMEF20 | 13325450 | 2.1837  | 2.033  | 0.1797  |
| CHB | PRAMEF20 | 13330450 | 2.4717  | 2.3718 | 0.1055  |
| CHB | PRAMEF20 | 13335450 | 0.288   | 0.8471 | -1.2608 |
| CHB | PRAMEF20 | 13340450 | 0       | 0.5082 | -1.5953 |
| CHB | PRAMEF20 | 13345450 | 1.0364  | 2.033  | -1.1885 |
| CHB | PRAMEF20 | 13350450 | 3.7723  | 7.4543 | -1.4493 |
| CHB | PRAMEF20 | 13355450 | 2.7938  | 5.9295 | -1.518  |
| CHB | PRAMEF20 | 13360450 | 0.0579  | 0.5082 | -1.4136 |
| CHB | PRAMEF20 | 13365450 | 1.4748  | 0.8471 | 1.4155  |
| CHB | PRAMEF20 | 13370450 | 2.9151  | 1.5247 | 2.0656  |
| CHB | PRAMEF20 | 13375450 | 5.1681  | 3.2189 | 1.6025  |
| CHB | PRAMEF20 | 13380450 | 13.3261 | 9.3178 | 1.2848  |
| CHB | PRAMEF20 | 13385450 | 10.2884 | 7.7931 | 0.9431  |
| CHB | PRAMEF20 | 13390450 | 0.6901  | 1.0165 | -0.6496 |
| CHB | PRAMEF20 | 13395450 | 0       | 0      | 0       |
| CHB | PRAMEF20 | 13400450 | 0       | 0      | 0       |
| CHB | PRAMEF20 | 13405450 | 0       | 0      | 0       |
| CHB | PRAMEF20 | 13410450 | 3.276   | 2.5412 | 0.7338  |
| CHB | PRAMEF20 | 13415450 | 3.276   | 2.5412 | 0.7338  |
| CHB | PRAMEF20 | 13420450 | 0.8094  | 0.3388 | 1.8877  |
| CHB | PRAMEF20 | 13425450 | 1.2378  | 0.5082 | 2.2903  |
| CHB | PRAMEF20 | 13430450 | 0.4283  | 0.1694 | 1.5384  |
| CHB | PRAMEF20 | 13435450 | 0       | 0      | 0       |
| CHB | PRAMEF20 | 13440450 | 0       | 0      | 0       |
| CHB | PRAMEF20 | 13445450 | 1.0632  | 1.1859 | -0.219  |
| CHB | PRAMEF20 | 13450450 | 1.0632  | 1.1859 | -0.219  |
| CHB | PRAMEF20 | 13455450 | 1.0069  | 0.6777 | 0.8606  |
| CHB | PRAMEF20 | 13460450 | 1.0069  | 0.6777 | 0.8606  |
| CHB | PRAMEF20 | 13465450 | 2.1256  | 1.5247 | 0.8927  |
| CHB | PRAMEF20 | 13470450 | 4.4314  | 2.8801 | 1.3987  |
| CHB | PRAMEF20 | 13475450 | 2.3057  | 1.3553 | 1.5403  |
| CHB | PRAMEF20 | 13480450 | 6.6155  | 3.8965 | 1.9017  |
| CHB | PRAMEF20 | 13485450 | 11.679  | 7.4543 | 1.663   |
| CHB | PRAMEF20 | 13490450 | 5.1296  | 3.8965 | 0.8625  |
| CHB | PRAMEF20 | 13495450 | 2.4137  | 2.2024 | 0.2366  |
| CHB | PRAMEF20 | 13500450 | 3.4026  | 2.5412 | 0.8602  |
| CHB | PRAMEF20 | 13505450 | 1.3021  | 1.0165 | 0.5684  |
| CHB | PRAMEF20 | 13510450 | 0.8666  | 0.6777 | 0.4938  |
| CHB | PRAMEF20 | 13515450 | 2.2886  | 3.2189 | -0.7648 |
| CHB | PRAMEF20 | 13520450 | 1.6789  | 3.0495 | -1.1787 |
| CHB | PRAMEF20 | 13525450 | 0.0097  | 0.1694 | -0.949  |

## 2\_TajimasD\_data

|     |          |          |        |        |         |
|-----|----------|----------|--------|--------|---------|
| CHB | PRAMEF20 | 13530450 | 0      | 0      | 0       |
| CHB | PRAMEF20 | 13535450 | 1.6981 | 1.1859 | 0.9143  |
| CHB | PRAMEF20 | 13540450 | 2.0742 | 1.5247 | 0.8164  |
| CHB | PRAMEF20 | 13545450 | 0.5041 | 0.5082 | -0.0129 |
| CHB | PRAMEF20 | 13550450 | 0.786  | 1.1859 | -0.7138 |
| CHB | PRAMEF20 | 13555450 | 0.7955 | 1.3553 | -0.9073 |
| CHB | PRAMEF20 | 13560450 | 0.1374 | 0.3388 | -0.8079 |
| CHB | PRAMEF20 | 13565450 | 0      | 0      | 0       |
| CHB | PRAMEF20 | 13570450 | 0      | 0      | 0       |
| CHB | PRAMEF20 | 13575450 | 0      | 0      | 0       |
| CHB | PRAMEF20 | 13580450 | 0      | 0      | 0       |
| CHB | PRAMEF20 | 13585450 | 0      | 0      | 0       |
| CHB | PRAMEF20 | 13590450 | 0      | 0      | 0       |
| CHB | PRAMEF20 | 13595450 | 0      | 0      | 0       |
| CHB | PRAMEF20 | 13600450 | 0      | 0      | 0       |
| CHB | PRAMEF20 | 13605450 | 0      | 0      | 0       |
| CHB | PRAMEF20 | 13610450 | 0      | 0      | 0       |
| CHB | PRAMEF20 | 13615450 | 0      | 0      | 0       |
| CHB | PRAMEF20 | 13620450 | 0      | 0      | 0       |
| CHB | PRAMEF20 | 13625450 | 0      | 0      | 0       |
| CHB | PRAMEF20 | 13630450 | 0.9098 | 2.5412 | -1.6291 |
| CHB | PRAMEF20 | 13635450 | 0.9098 | 2.5412 | -1.6291 |
| CHB | PRAMEF20 | 13640450 | 0.7828 | 0.3388 | 1.781   |
| CHB | PRAMEF20 | 13645450 | 0.9018 | 0.5082 | 1.2356  |
| CHB | PRAMEF20 | 13650450 | 0.1287 | 0.3388 | -0.8428 |
| CHB | PRAMEF20 | 13655450 | 0.0097 | 0.1694 | -0.949  |
| CHB | PRAMEF20 | 13660450 | 0      | 0      | 0       |
| CHB | PRAMEF20 | 13665450 | 1.3333 | 1.1859 | 0.2631  |
| CHB | PRAMEF20 | 13670450 | 1.3333 | 1.1859 | 0.2631  |
| CHB | PRAMEF20 | 13675450 | 0.0765 | 0.3388 | -1.0522 |
| CHB | PRAMEF20 | 13680450 | 0.0765 | 0.3388 | -1.0522 |
| CHB | PRAMEF20 | 13685450 | 0.189  | 0.6777 | -1.2776 |
| CHB | PRAMEF20 | 13690450 | 0.189  | 0.6777 | -1.2776 |
| CHB | PRAMEF20 | 13695450 | 0.5146 | 2.2024 | -1.8899 |
| CHB | PRAMEF20 | 13700450 | 2.9682 | 4.913  | -1.1124 |
| CHB | PRAMEF20 | 13705450 | 4.0272 | 3.8965 | 0.0914  |
| CHB | PRAMEF20 | 13710450 | 1.9964 | 2.2024 | -0.2307 |
| CHB | PRAMEF20 | 13715450 | 2.5243 | 4.2354 | -1.1139 |
| CHB | PRAMEF20 | 13720450 | 3.2159 | 4.7436 | -0.9012 |
| CHB | PRAMEF20 | 13725450 | 1.1338 | 1.8636 | -0.9311 |
| CHB | PRAMEF20 | 13730450 | 1.5962 | 1.5247 | 0.1062  |
| CHB | PRAMEF20 | 13735450 | 2.1601 | 1.8636 | 0.3783  |
| CHB | PRAMEF20 | 13740450 | 1.3436 | 1.6942 | -0.4812 |
| CHB | PRAMEF20 | 13745450 | 0.7603 | 1.0165 | -0.5099 |
| CHB | PRAMEF20 | 13750450 | 0      | 0      | 0       |
| CHB | PRAMEF20 | 13755450 | 0      | 0      | 0       |
| CHB | PRAMEF20 | 13760450 | 0      | 0      | 0       |
| CHB | PRAMEF20 | 13765450 | 0.5654 | 0.5082 | 0.1796  |
| CHB | PRAMEF20 | 13770450 | 3.0624 | 1.8636 | 1.5295  |



## 2\_TajimasD\_data

|     |          |          |         |         |         |
|-----|----------|----------|---------|---------|---------|
| CHB | PRAMEF20 | 13775450 | 5.5637  | 3.3883  | 1.7132  |
| CHB | PRAMEF20 | 13780450 | 17.3158 | 10.1649 | 2.1139  |
| CHB | PRAMEF20 | 13785450 | 21.925  | 14.9085 | 1.4454  |
| CHB | PRAMEF20 | 13790450 | 21.1612 | 16.4333 | 0.8875  |
| CHB | PRAMEF20 | 13795450 | 20.5125 | 15.0779 | 1.1075  |
| CHB | PRAMEF20 | 13800450 | 12.5721 | 9.6567  | 0.904   |
| CHB | PRAMEF20 | 13805450 | 15.0598 | 12.5367 | 0.6126  |
| CHB | PRAMEF20 | 13810450 | 14.301  | 15.2474 | -0.1908 |
| CHB | PRAMEF20 | 13815450 | 13.0074 | 13.5532 | -0.1231 |
| CHB | PRAMEF20 | 13820450 | 21.3617 | 15.7556 | 1.0956  |
| CHB | PRAMEF20 | 13825450 | 19.5024 | 16.7721 | 0.5026  |
| CHB | PRAMEF20 | 13830450 | 14.8367 | 16.2638 | -0.2706 |
| CHB | PRAMEF20 | 13835450 | 12.1643 | 14.0615 | -0.4132 |
| CHB | PRAMEF20 | 13840450 | 13.0546 | 13.7226 | -0.1489 |
| CHB | PRAMEF20 | 13845450 | 14.3154 | 13.892  | 0.0933  |
| CHB | PRAMEF20 | 13850450 | 16.513  | 13.892  | 0.5774  |
| CHB | PRAMEF20 | 13855450 | 18.9298 | 17.1109 | 0.3285  |
| CHB | PRAMEF20 | 13860450 | 13.7053 | 15.925  | -0.4294 |
| CHB | PRAMEF20 | 13865450 | 13.8246 | 14.2309 | -0.0875 |
| CHB | PRAMEF20 | 13870450 | 23.538  | 16.0944 | 1.4254  |
| CHB | PRAMEF20 | 13875450 | 19.2858 | 12.8755 | 1.5176  |
| CHB | PRAMEF20 | 13880450 | 9.9345  | 10.5037 | -0.1632 |
| CHB | PRAMEF20 | 13885450 | 15.9143 | 14.2309 | 0.3625  |
| CHB | PRAMEF20 | 13890450 | 19.237  | 16.0944 | 0.6018  |
| CHB | PRAMEF20 | 13895450 | 14.715  | 16.7721 | -0.3787 |
| CHB | PRAMEF20 | 13900450 | 11.6954 | 14.4003 | -0.5759 |
| CHB | PRAMEF20 | 13905450 | 13.6665 | 12.5367 | 0.2743  |
| CHB | PRAMEF20 | 13910450 | 11.5719 | 12.8755 | -0.3086 |
| CHB | PRAMEF20 | 13915450 | 11.6259 | 13.045  | -0.3318 |
| YRI | PRAMEF20 | 12915450 | 22.2868 | 29.5789 | -0.7731 |
| YRI | PRAMEF20 | 12920450 | 24.3389 | 27.7303 | -0.3829 |
| YRI | PRAMEF20 | 12925450 | 14.5076 | 17.4785 | -0.5239 |
| YRI | PRAMEF20 | 12930450 | 10.1536 | 13.613  | -0.7743 |
| YRI | PRAMEF20 | 12935450 | 9.8166  | 17.1423 | -1.3162 |
| YRI | PRAMEF20 | 12940450 | 21.4788 | 27.7303 | -0.7058 |
| YRI | PRAMEF20 | 12945450 | 23.3365 | 30.5873 | -0.744  |
| YRI | PRAMEF20 | 12950450 | 9.84    | 19.9994 | -1.5741 |
| YRI | PRAMEF20 | 12955450 | 5.2669  | 12.1005 | -1.7096 |
| YRI | PRAMEF20 | 12960450 | 3.8831  | 7.2267  | -1.3492 |
| YRI | PRAMEF20 | 12965450 | 3.1973  | 5.0419  | -1.0278 |
| YRI | PRAMEF20 | 12970450 | 1.7494  | 3.8654  | -1.4849 |
| YRI | PRAMEF20 | 12975450 | 0.9488  | 2.3529  | -1.4863 |
| YRI | PRAMEF20 | 12980450 | 3.562   | 5.378   | -0.9557 |
| YRI | PRAMEF20 | 12985450 | 5.6115  | 8.4031  | -0.9811 |
| YRI | PRAMEF20 | 12990450 | 6.5475  | 6.7225  | -0.0754 |
| YRI | PRAMEF20 | 12995450 | 6.5251  | 5.8822  | 0.3124  |
| YRI | PRAMEF20 | 13000450 | 4.483   | 5.0419  | -0.3114 |
| YRI | PRAMEF20 | 13005450 | 4.1658  | 4.0335  | 0.0895  |
| YRI | PRAMEF20 | 13010450 | 6.1719  | 6.3864  | -0.0968 |

## 2\_TajimasD\_data

|     |          |          |         |         |         |
|-----|----------|----------|---------|---------|---------|
| YRI | PRAMEF20 | 13015450 | 5.6356  | 5.0419  | 0.3308  |
| YRI | PRAMEF20 | 13020450 | 1.5474  | 1.0084  | 1.0746  |
| YRI | PRAMEF20 | 13025450 | 0.3242  | 0.8403  | -1.1657 |
| YRI | PRAMEF20 | 13030450 | 0.1585  | 0.6722  | -1.3448 |
| YRI | PRAMEF20 | 13035450 | 2.7773  | 3.6974  | -0.6706 |
| YRI | PRAMEF20 | 13040450 | 3.066   | 3.8654  | -0.561  |
| YRI | PRAMEF20 | 13045450 | 4.2304  | 10.0837 | -1.7373 |
| YRI | PRAMEF20 | 13050450 | 6.7103  | 15.2937 | -1.7199 |
| YRI | PRAMEF20 | 13055450 | 2.7869  | 5.5461  | -1.413  |
| YRI | PRAMEF20 | 13060450 | 0       | 0       | 0       |
| YRI | PRAMEF20 | 13065450 | 0       | 0       | 0       |
| YRI | PRAMEF20 | 13070450 | 0       | 0       | 0       |
| YRI | PRAMEF20 | 13075450 | 0       | 0       | 0       |
| YRI | PRAMEF20 | 13080450 | 0       | 0       | 0       |
| YRI | PRAMEF20 | 13085450 | 0       | 0       | 0       |
| YRI | PRAMEF20 | 13090450 | 0       | 0       | 0       |
| YRI | PRAMEF20 | 13095450 | 0       | 0       | 0       |
| YRI | PRAMEF20 | 13100450 | 0       | 0       | 0       |
| YRI | PRAMEF20 | 13105450 | 0.4735  | 0.1681  | 1.8155  |
| YRI | PRAMEF20 | 13110450 | 1.9676  | 2.3529  | -0.4079 |
| YRI | PRAMEF20 | 13115450 | 2.1301  | 3.3612  | -0.9726 |
| YRI | PRAMEF20 | 13120450 | 4.7338  | 6.7225  | -0.8569 |
| YRI | PRAMEF20 | 13125450 | 14.053  | 14.6214 | -0.1189 |
| YRI | PRAMEF20 | 13130450 | 17.1439 | 14.9575 | 0.4475  |
| YRI | PRAMEF20 | 13135450 | 10.6314 | 8.4031  | 0.7832  |
| YRI | PRAMEF20 | 13140450 | 6.8968  | 6.0502  | 0.4011  |
| YRI | PRAMEF20 | 13145450 | 4.5564  | 6.0502  | -0.7078 |
| YRI | PRAMEF20 | 13150450 | 1.2621  | 3.0251  | -1.5209 |
| YRI | PRAMEF20 | 13155450 | 1.4677  | 2.5209  | -1.0547 |
| YRI | PRAMEF20 | 13160450 | 1.4446  | 3.0251  | -1.3634 |
| YRI | PRAMEF20 | 13165450 | 1.4656  | 2.0167  | -0.6589 |
| YRI | PRAMEF20 | 13170450 | 6.5165  | 6.5544  | -0.0167 |
| YRI | PRAMEF20 | 13175450 | 13.0526 | 19.8313 | -1.0588 |
| YRI | PRAMEF20 | 13180450 | 17.242  | 28.5706 | -1.2423 |
| YRI | PRAMEF20 | 13185450 | 18.046  | 23.0245 | -0.6732 |
| YRI | PRAMEF20 | 13190450 | 9.6745  | 9.5795  | 0.0296  |
| YRI | PRAMEF20 | 13195450 | 2.0897  | 3.0251  | -0.8069 |
| YRI | PRAMEF20 | 13200450 | 4.2989  | 6.2183  | -0.8873 |
| YRI | PRAMEF20 | 13205450 | 4.0888  | 5.2099  | -0.6068 |
| YRI | PRAMEF20 | 13210450 | 1.8995  | 3.8654  | -1.3796 |
| YRI | PRAMEF20 | 13215450 | 1.8866  | 4.8738  | -1.7147 |
| YRI | PRAMEF20 | 13220450 | 0.8611  | 2.1848  | -1.4862 |
| YRI | PRAMEF20 | 13225450 | 0       | 0       | 0       |
| YRI | PRAMEF20 | 13230450 | 0       | 0       | 0       |
| YRI | PRAMEF20 | 13235450 | 0       | 0       | 0       |
| YRI | PRAMEF20 | 13240450 | 0       | 0       | 0       |
| YRI | PRAMEF20 | 13245450 | 0       | 0       | 0       |
| YRI | PRAMEF20 | 13250450 | 0       | 0       | 0       |
| YRI | PRAMEF20 | 13255450 | 0       | 0       | 0       |

## 2\_TajimasD\_data

|     |          |          |        |         |         |
|-----|----------|----------|--------|---------|---------|
| YRI | PRAMEF20 | 13260450 | 0      | 0       | 0       |
| YRI | PRAMEF20 | 13265450 | 0      | 0       | 0       |
| YRI | PRAMEF20 | 13270450 | 0      | 0       | 0       |
| YRI | PRAMEF20 | 13275450 | 0      | 0       | 0       |
| YRI | PRAMEF20 | 13280450 | 0      | 0       | 0       |
| YRI | PRAMEF20 | 13285450 | 0      | 0       | 0       |
| YRI | PRAMEF20 | 13290450 | 0      | 0       | 0       |
| YRI | PRAMEF20 | 13295450 | 0      | 0       | 0       |
| YRI | PRAMEF20 | 13300450 | 0      | 0       | 0       |
| YRI | PRAMEF20 | 13305450 | 0      | 0       | 0       |
| YRI | PRAMEF20 | 13310450 | 0      | 0       | 0       |
| YRI | PRAMEF20 | 13315450 | 0      | 0       | 0       |
| YRI | PRAMEF20 | 13320450 | 0      | 0       | 0       |
| YRI | PRAMEF20 | 13325450 | 1.3521 | 2.3529  | -1.0594 |
| YRI | PRAMEF20 | 13330450 | 1.4065 | 2.5209  | -1.116  |
| YRI | PRAMEF20 | 13335450 | 0.0821 | 0.6722  | -1.5448 |
| YRI | PRAMEF20 | 13340450 | 0.0278 | 0.5042  | -1.4972 |
| YRI | PRAMEF20 | 13345450 | 1.24   | 2.0167  | -0.9287 |
| YRI | PRAMEF20 | 13350450 | 5.4184 | 9.5795  | -1.2955 |
| YRI | PRAMEF20 | 13355450 | 4.6207 | 8.235   | -1.2941 |
| YRI | PRAMEF20 | 13360450 | 0.4424 | 0.6722  | -0.6016 |
| YRI | PRAMEF20 | 13365450 | 1.5663 | 1.3445  | 0.3602  |
| YRI | PRAMEF20 | 13370450 | 3.1085 | 3.8654  | -0.5312 |
| YRI | PRAMEF20 | 13375450 | 5.3819 | 6.8906  | -0.6357 |
| YRI | PRAMEF20 | 13380450 | 11.875 | 11.5963 | 0.0726  |
| YRI | PRAMEF20 | 13385450 | 9.7462 | 8.9073  | 0.2794  |
| YRI | PRAMEF20 | 13390450 | 1.7108 | 1.6806  | 0.0415  |
| YRI | PRAMEF20 | 13395450 | 0      | 0       | 0       |
| YRI | PRAMEF20 | 13400450 | 0      | 0       | 0       |
| YRI | PRAMEF20 | 13405450 | 0      | 0       | 0       |
| YRI | PRAMEF20 | 13410450 | 3.1168 | 2.5209  | 0.5968  |
| YRI | PRAMEF20 | 13415450 | 3.1168 | 2.5209  | 0.5968  |
| YRI | PRAMEF20 | 13420450 | 0.0996 | 0.3361  | -0.9494 |
| YRI | PRAMEF20 | 13425450 | 0.1449 | 0.5042  | -1.1292 |
| YRI | PRAMEF20 | 13430450 | 0.0453 | 0.1681  | -0.73   |
| YRI | PRAMEF20 | 13435450 | 0      | 0       | 0       |
| YRI | PRAMEF20 | 13440450 | 0      | 0       | 0       |
| YRI | PRAMEF20 | 13445450 | 2.6596 | 1.3445  | 2.136   |
| YRI | PRAMEF20 | 13450450 | 2.6596 | 1.3445  | 2.136   |
| YRI | PRAMEF20 | 13455450 | 0.7522 | 0.6722  | 0.2094  |
| YRI | PRAMEF20 | 13460450 | 0.7522 | 0.6722  | 0.2094  |
| YRI | PRAMEF20 | 13465450 | 1.7736 | 1.8487  | -0.0961 |
| YRI | PRAMEF20 | 13470450 | 2.1831 | 3.5293  | -1.0207 |
| YRI | PRAMEF20 | 13475450 | 0.4095 | 1.6806  | -1.7487 |
| YRI | PRAMEF20 | 13480450 | 3.4941 | 4.5377  | -0.6377 |
| YRI | PRAMEF20 | 13485450 | 6.396  | 7.8989  | -0.5591 |
| YRI | PRAMEF20 | 13490450 | 3.2663 | 3.8654  | -0.4204 |
| YRI | PRAMEF20 | 13495450 | 1.1096 | 3.0251  | -1.6524 |
| YRI | PRAMEF20 | 13500450 | 0.9785 | 3.3612  | -1.8824 |

## 2\_TajimasD\_data

|     |          |          |        |        |         |
|-----|----------|----------|--------|--------|---------|
| YRI | PRAMEF20 | 13505450 | 0.3154 | 1.3445 | -1.6714 |
| YRI | PRAMEF20 | 13510450 | 0.8311 | 1.6806 | -1.1687 |
| YRI | PRAMEF20 | 13515450 | 2.667  | 4.7057 | -1.2068 |
| YRI | PRAMEF20 | 13520450 | 2.2002 | 4.2016 | -1.3074 |
| YRI | PRAMEF20 | 13525450 | 0.2821 | 0.6722 | -1.0213 |
| YRI | PRAMEF20 | 13530450 | 0      | 0      | 0       |
| YRI | PRAMEF20 | 13535450 | 2.5774 | 1.5126 | 1.5855  |
| YRI | PRAMEF20 | 13540450 | 3.0809 | 1.6806 | 1.9264  |
| YRI | PRAMEF20 | 13545450 | 0.7955 | 0.3361 | 1.8443  |
| YRI | PRAMEF20 | 13550450 | 1.2133 | 1.3445 | -0.2131 |
| YRI | PRAMEF20 | 13555450 | 1.0917 | 1.6806 | -0.8102 |
| YRI | PRAMEF20 | 13560450 | 0.1704 | 0.5042 | -1.049  |
| YRI | PRAMEF20 | 13565450 | 0      | 0      | 0       |
| YRI | PRAMEF20 | 13570450 | 0      | 0      | 0       |
| YRI | PRAMEF20 | 13575450 | 0      | 0      | 0       |
| YRI | PRAMEF20 | 13580450 | 0      | 0      | 0       |
| YRI | PRAMEF20 | 13585450 | 0      | 0      | 0       |
| YRI | PRAMEF20 | 13590450 | 0      | 0      | 0       |
| YRI | PRAMEF20 | 13595450 | 0      | 0      | 0       |
| YRI | PRAMEF20 | 13600450 | 0      | 0      | 0       |
| YRI | PRAMEF20 | 13605450 | 0      | 0      | 0       |
| YRI | PRAMEF20 | 13610450 | 0      | 0      | 0       |
| YRI | PRAMEF20 | 13615450 | 0      | 0      | 0       |
| YRI | PRAMEF20 | 13620450 | 0      | 0      | 0       |
| YRI | PRAMEF20 | 13625450 | 0      | 0      | 0       |
| YRI | PRAMEF20 | 13630450 | 1.1751 | 2.1848 | -1.1337 |
| YRI | PRAMEF20 | 13635450 | 1.1751 | 2.1848 | -1.1337 |
| YRI | PRAMEF20 | 13640450 | 0.17   | 0.6722 | -1.3147 |
| YRI | PRAMEF20 | 13645450 | 0.3345 | 1.1764 | -1.5058 |
| YRI | PRAMEF20 | 13650450 | 0.1921 | 0.6722 | -1.2569 |
| YRI | PRAMEF20 | 13655450 | 0.0276 | 0.1681 | -0.8352 |
| YRI | PRAMEF20 | 13660450 | 0      | 0      | 0       |
| YRI | PRAMEF20 | 13665450 | 1.6047 | 2.3529 | -0.792  |
| YRI | PRAMEF20 | 13670450 | 1.6687 | 2.8571 | -1.0747 |
| YRI | PRAMEF20 | 13675450 | 0.1008 | 0.8403 | -1.6703 |
| YRI | PRAMEF20 | 13680450 | 0.0369 | 0.3361 | -1.2012 |
| YRI | PRAMEF20 | 13685450 | 1.1727 | 0.8403 | 0.7508  |
| YRI | PRAMEF20 | 13690450 | 1.1727 | 0.8403 | 0.7508  |
| YRI | PRAMEF20 | 13695450 | 0.3701 | 2.1848 | -2.0375 |
| YRI | PRAMEF20 | 13700450 | 2.6762 | 5.5461 | -1.4697 |
| YRI | PRAMEF20 | 13705450 | 4.099  | 5.7141 | -0.8054 |
| YRI | PRAMEF20 | 13710450 | 2.5944 | 3.3612 | -0.6058 |
| YRI | PRAMEF20 | 13715450 | 2.416  | 4.2016 | -1.1664 |
| YRI | PRAMEF20 | 13720450 | 3.0744 | 5.2099 | -1.1559 |
| YRI | PRAMEF20 | 13725450 | 1.5693 | 2.5209 | -0.953  |
| YRI | PRAMEF20 | 13730450 | 2.2505 | 2.3529 | -0.1084 |
| YRI | PRAMEF20 | 13735450 | 3.2987 | 3.1932 | 0.087   |
| YRI | PRAMEF20 | 13740450 | 2.2683 | 2.5209 | -0.253  |
| YRI | PRAMEF20 | 13745450 | 1.1107 | 1.1764 | -0.1175 |

## 2\_TajimasD\_data

|     |          |          |         |         |         |
|-----|----------|----------|---------|---------|---------|
| YRI | PRAMEF20 | 13750450 | 0       | 0       | 0       |
| YRI | PRAMEF20 | 13755450 | 0       | 0       | 0       |
| YRI | PRAMEF20 | 13760450 | 0       | 0       | 0       |
| YRI | PRAMEF20 | 13765450 | 1.413   | 1.0084  | 0.8066  |
| YRI | PRAMEF20 | 13770450 | 2.9158  | 4.2016  | -0.8399 |
| YRI | PRAMEF20 | 13775450 | 4.7006  | 7.8989  | -1.1898 |
| YRI | PRAMEF20 | 13780450 | 16.7818 | 15.2937 | 0.2982  |
| YRI | PRAMEF20 | 13785450 | 21.2155 | 18.4868 | 0.456   |
| YRI | PRAMEF20 | 13790450 | 21.9561 | 19.9994 | 0.3032  |
| YRI | PRAMEF20 | 13795450 | 22.4139 | 21.512  | 0.1302  |
| YRI | PRAMEF20 | 13800450 | 12.8449 | 15.9659 | -0.6002 |
| YRI | PRAMEF20 | 13805450 | 11.2248 | 18.3188 | -1.196  |
| YRI | PRAMEF20 | 13810450 | 15.7958 | 23.1926 | -0.9933 |
| YRI | PRAMEF20 | 13815450 | 19.3262 | 20.3355 | -0.1539 |
| YRI | PRAMEF20 | 13820450 | 23.1432 | 20.3355 | 0.4281  |
| YRI | PRAMEF20 | 13825450 | 23.0372 | 22.8565 | 0.0246  |
| YRI | PRAMEF20 | 13830450 | 18.8022 | 20.6717 | -0.2806 |
| YRI | PRAMEF20 | 13835450 | 14.032  | 16.9743 | -0.5337 |
| YRI | PRAMEF20 | 13840450 | 13.6729 | 16.9743 | -0.5988 |
| YRI | PRAMEF20 | 13845450 | 13.8905 | 17.8146 | -0.6795 |
| YRI | PRAMEF20 | 13850450 | 20.155  | 20.6717 | -0.0775 |
| YRI | PRAMEF20 | 13855450 | 24.8172 | 24.7051 | 0.0142  |
| YRI | PRAMEF20 | 13860450 | 18.3915 | 24.0329 | -0.7319 |
| YRI | PRAMEF20 | 13865450 | 18.6435 | 23.1926 | -0.6109 |
| YRI | PRAMEF20 | 13870450 | 24.1625 | 22.1842 | 0.2773  |
| YRI | PRAMEF20 | 13875450 | 17.7233 | 18.6549 | -0.1543 |
| YRI | PRAMEF20 | 13880450 | 10.4661 | 18.4868 | -1.3404 |
| YRI | PRAMEF20 | 13885450 | 18.3508 | 24.5371 | -0.7866 |
| YRI | PRAMEF20 | 13890450 | 25.7638 | 27.2261 | -0.1681 |
| YRI | PRAMEF20 | 13895450 | 22.4097 | 21.512  | 0.1296  |
| YRI | PRAMEF20 | 13900450 | 17.4954 | 17.4785 | 0.003   |
| YRI | PRAMEF20 | 13905450 | 18.1173 | 16.6382 | 0.2735  |
| YRI | PRAMEF20 | 13910450 | 15.4406 | 14.1172 | 0.2862  |
| YRI | PRAMEF20 | 13915450 | 15.0003 | 15.2937 | -0.0588 |
| CEU | PRAMEF5  | 12759198 | 3.8518  | 5.6286  | -0.9038 |
| CEU | PRAMEF5  | 12764198 | 3.8633  | 5.2874  | -0.7657 |
| CEU | PRAMEF5  | 12769198 | 4.5731  | 7.3342  | -1.1063 |
| CEU | PRAMEF5  | 12774198 | 6.9132  | 9.7221  | -0.868  |
| CEU | PRAMEF5  | 12779198 | 9.1231  | 10.4043 | -0.3717 |
| CEU | PRAMEF5  | 12784198 | 12.3599 | 11.9394 | 0.1072  |
| CEU | PRAMEF5  | 12789198 | 11.6999 | 10.7454 | 0.2687  |
| CEU | PRAMEF5  | 12794198 | 11.4958 | 9.7221  | 0.5481  |
| CEU | PRAMEF5  | 12799198 | 14.7477 | 10.2337 | 1.3299  |
| CEU | PRAMEF5  | 12804198 | 11.0761 | 8.3576  | 0.9663  |
| CEU | PRAMEF5  | 12809198 | 5.2342  | 7.6753  | -0.9383 |
| CEU | PRAMEF5  | 12814198 | 7.8747  | 10.0632 | -0.6549 |
| CEU | PRAMEF5  | 12819198 | 10.8176 | 10.7454 | 0.0203  |
| CEU | PRAMEF5  | 12824198 | 10.0606 | 9.0398  | 0.3375  |
| CEU | PRAMEF5  | 12829198 | 10.5442 | 9.0398  | 0.4974  |

## 2\_TajimasD\_data

|     |         |          |         |         |         |
|-----|---------|----------|---------|---------|---------|
| CEU | PRAMEF5 | 12834198 | 8.0476  | 11.4277 | -0.898  |
| CEU | PRAMEF5 | 12839198 | 6.3352  | 9.7221  | -1.0467 |
| CEU | PRAMEF5 | 12844198 | 7.8114  | 7.8459  | -0.013  |
| CEU | PRAMEF5 | 12849198 | 13.6108 | 14.1567 | -0.1185 |
| CEU | PRAMEF5 | 12854198 | 19.8458 | 19.9558 | -0.0172 |
| CEU | PRAMEF5 | 12859198 | 19.9963 | 22.6848 | -0.3711 |
| CEU | PRAMEF5 | 12864198 | 26.0478 | 45.3696 | -1.3558 |
| CEU | PRAMEF5 | 12869198 | 29.376  | 57.8207 | -1.5718 |
| CEU | PRAMEF5 | 12874198 | 18.3591 | 28.8251 | -1.1449 |
| CEU | PRAMEF5 | 12879198 | 15.1548 | 11.5982 | 0.9319  |
| CEU | PRAMEF5 | 12884198 | 21.9848 | 17.9091 | 0.7066  |
| CEU | PRAMEF5 | 12889198 | 22.6156 | 16.5446 | 1.1355  |
| CEU | PRAMEF5 | 12894198 | 24.202  | 22.5142 | 0.2347  |
| CEU | PRAMEF5 | 12899198 | 18.6019 | 24.0493 | -0.7106 |
| CEU | PRAMEF5 | 12904198 | 7.5904  | 12.7922 | -1.2426 |
| CEU | PRAMEF5 | 12909198 | 10.2524 | 17.3974 | -1.2736 |
| CEU | PRAMEF5 | 12914198 | 17.0657 | 25.2432 | -1.0178 |
| CEU | PRAMEF5 | 12919198 | 20.2385 | 26.7783 | -0.7686 |
| CEU | PRAMEF5 | 12924198 | 13.5032 | 18.4207 | -0.8298 |
| CEU | PRAMEF5 | 12929198 | 7.8928  | 8.6987  | -0.2761 |
| CEU | PRAMEF5 | 12934198 | 6.5306  | 7.6753  | -0.44   |
| CEU | PRAMEF5 | 12939198 | 13.0795 | 15.6917 | -0.5139 |
| CEU | PRAMEF5 | 12944198 | 17.016  | 17.7385 | -0.1264 |
| CEU | PRAMEF5 | 12949198 | 8.5397  | 10.916  | -0.6591 |
| CEU | PRAMEF5 | 12954198 | 3.8623  | 8.5281  | -1.628  |
| CEU | PRAMEF5 | 12959198 | 3.3591  | 4.9463  | -0.9052 |
| CEU | PRAMEF5 | 12964198 | 2.7584  | 2.3879  | 0.3902  |
| CEU | PRAMEF5 | 12969198 | 0.4578  | 0.6822  | -0.586  |
| CEU | PRAMEF5 | 12974198 | 0.2263  | 0.5117  | -0.8951 |
| CEU | PRAMEF5 | 12979198 | 0.9592  | 3.2407  | -1.8708 |
| CEU | PRAMEF5 | 12984198 | 4.0618  | 6.9931  | -1.2265 |
| CEU | PRAMEF5 | 12989198 | 4.5529  | 6.8225  | -0.9712 |
| CEU | PRAMEF5 | 12994198 | 2.7992  | 5.2874  | -1.3379 |
| CEU | PRAMEF5 | 12999198 | 2.711   | 4.7757  | -1.2143 |
| CEU | PRAMEF5 | 13004198 | 1.8771  | 2.8996  | -0.9196 |
| CEU | PRAMEF5 | 13009198 | 4.2331  | 4.6052  | -0.2259 |
| CEU | PRAMEF5 | 13014198 | 4.4401  | 6.3108  | -0.8589 |
| CEU | PRAMEF5 | 13019198 | 0.9615  | 3.2407  | -1.8689 |
| CEU | PRAMEF5 | 13024198 | 0.2191  | 0.8528  | -1.4271 |
| CEU | PRAMEF5 | 13029198 | 0.0101  | 0.1706  | -0.9534 |
| CEU | PRAMEF5 | 13034198 | 0.3958  | 0.8528  | -1.0291 |
| CEU | PRAMEF5 | 13039198 | 3.7852  | 2.3879  | 1.4715  |
| CEU | PRAMEF5 | 13044198 | 5.8015  | 4.4346  | 0.8576  |
| CEU | PRAMEF5 | 13049198 | 5.8868  | 8.187   | -0.8333 |
| CEU | PRAMEF5 | 13054198 | 3.4848  | 5.458   | -1.0315 |
| CEU | PRAMEF5 | 13059198 | 0       | 0       | 0       |
| CEU | PRAMEF5 | 13064198 | 0       | 0       | 0       |
| CEU | PRAMEF5 | 13069198 | 0       | 0       | 0       |
| CEU | PRAMEF5 | 13074198 | 0       | 0       | 0       |

## 2\_TajimasD\_data

|     |         |          |         |         |         |
|-----|---------|----------|---------|---------|---------|
| CEU | PRAMEF5 | 13079198 | 0       | 0       | 0       |
| CEU | PRAMEF5 | 13084198 | 0       | 0       | 0       |
| CEU | PRAMEF5 | 13089198 | 0       | 0       | 0       |
| CEU | PRAMEF5 | 13094198 | 0       | 0       | 0       |
| CEU | PRAMEF5 | 13099198 | 0       | 0       | 0       |
| CEU | PRAMEF5 | 13104198 | 0.5442  | 0.5117  | 0.1019  |
| CEU | PRAMEF5 | 13109198 | 1.242   | 1.1939  | 0.0857  |
| CEU | PRAMEF5 | 13114198 | 0.7382  | 1.3645  | -1.0132 |
| CEU | PRAMEF5 | 13119198 | 3.3053  | 4.6052  | -0.7892 |
| CEU | PRAMEF5 | 13124198 | 9.9388  | 14.3272 | -0.9415 |
| CEU | PRAMEF5 | 13129198 | 15.1763 | 16.7151 | -0.285  |
| CEU | PRAMEF5 | 13134198 | 9.2705  | 7.3342  | 0.7758  |
| CEU | PRAMEF5 | 13139198 | 5.4587  | 4.6052  | 0.5182  |
| CEU | PRAMEF5 | 13144198 | 5.616   | 5.6286  | -0.0064 |
| CEU | PRAMEF5 | 13149198 | 1.3107  | 3.2407  | -1.5826 |
| CEU | PRAMEF5 | 13154198 | 1.6067  | 2.729   | -1.0608 |
| CEU | PRAMEF5 | 13159198 | 1.3793  | 2.2173  | -0.9362 |
| CEU | PRAMEF5 | 13164198 | 1.3424  | 1.8762  | -0.6796 |
| CEU | PRAMEF5 | 13169198 | 4.1466  | 4.7757  | -0.37   |
| CEU | PRAMEF5 | 13174198 | 9.7456  | 11.9394 | -0.5593 |
| CEU | PRAMEF5 | 13179198 | 15.8407 | 20.2969 | -0.6849 |
| CEU | PRAMEF5 | 13184198 | 17.5286 | 18.9324 | -0.2307 |
| CEU | PRAMEF5 | 13189198 | 10.0581 | 8.5281  | 0.5338  |
| CEU | PRAMEF5 | 13194198 | 2.2564  | 2.8996  | -0.5784 |
| CEU | PRAMEF5 | 13199198 | 1.8573  | 2.729   | -0.8239 |
| CEU | PRAMEF5 | 13204198 | 1.9237  | 2.2173  | -0.328  |
| CEU | PRAMEF5 | 13209198 | 1.3554  | 2.2173  | -0.9629 |
| CEU | PRAMEF5 | 13214198 | 1.8615  | 2.5584  | -0.6942 |
| CEU | PRAMEF5 | 13219198 | 1.2826  | 1.7056  | -0.5793 |
| CEU | PRAMEF5 | 13224198 | 0.0404  | 0.5117  | -1.4781 |
| CEU | PRAMEF5 | 13229198 | 0       | 0       | 0       |
| CEU | PRAMEF5 | 13234198 | 0       | 0       | 0       |
| CEU | PRAMEF5 | 13239198 | 0       | 0       | 0       |
| CEU | PRAMEF5 | 13244198 | 0       | 0       | 0       |
| CEU | PRAMEF5 | 13249198 | 0       | 0       | 0       |
| CEU | PRAMEF5 | 13254198 | 0       | 0       | 0       |
| CEU | PRAMEF5 | 13259198 | 0       | 0       | 0       |
| CEU | PRAMEF5 | 13264198 | 0       | 0       | 0       |
| CEU | PRAMEF5 | 13269198 | 0       | 0       | 0       |
| CEU | PRAMEF5 | 13274198 | 0       | 0       | 0       |
| CEU | PRAMEF5 | 13279198 | 0       | 0       | 0       |
| CEU | PRAMEF5 | 13284198 | 0       | 0       | 0       |
| CEU | PRAMEF5 | 13289198 | 0       | 0       | 0       |
| CEU | PRAMEF5 | 13294198 | 0       | 0       | 0       |
| CEU | PRAMEF5 | 13299198 | 0       | 0       | 0       |
| CEU | PRAMEF5 | 13304198 | 0       | 0       | 0       |
| CEU | PRAMEF5 | 13309198 | 0       | 0       | 0       |
| CEU | PRAMEF5 | 13314198 | 0       | 0       | 0       |
| CEU | PRAMEF5 | 13319198 | 0       | 0       | 0       |

## 2\_TajimasD\_data

|     |         |          |         |        |         |
|-----|---------|----------|---------|--------|---------|
| CEU | PRAMEF5 | 13324198 | 0.5024  | 1.5351 | -1.5313 |
| CEU | PRAMEF5 | 13329198 | 0.6654  | 2.0467 | -1.6436 |
| CEU | PRAMEF5 | 13334198 | 0.1631  | 1.0234 | -1.7095 |
| CEU | PRAMEF5 | 13339198 | 0.0101  | 0.6822 | -1.7551 |
| CEU | PRAMEF5 | 13344198 | 1.0421  | 1.7056 | -0.9087 |
| CEU | PRAMEF5 | 13349198 | 4.6599  | 7.8459 | -1.2002 |
| CEU | PRAMEF5 | 13354198 | 3.8819  | 6.9931 | -1.3018 |
| CEU | PRAMEF5 | 13359198 | 0.254   | 0.6822 | -1.1182 |
| CEU | PRAMEF5 | 13364198 | 1.5366  | 1.0234 | 1.0198  |
| CEU | PRAMEF5 | 13369198 | 1.5366  | 1.0234 | 1.0198  |
| CEU | PRAMEF5 | 13374198 | 5.0736  | 2.3879 | 2.8283  |
| CEU | PRAMEF5 | 13379198 | 13.7794 | 9.0398 | 1.567   |
| CEU | PRAMEF5 | 13384198 | 11.8808 | 8.6987 | 1.0902  |
| CEU | PRAMEF5 | 13389198 | 3.175   | 2.0467 | 1.3426  |
| CEU | PRAMEF5 | 13394198 | 0       | 0      | 0       |
| CEU | PRAMEF5 | 13399198 | 0       | 0      | 0       |
| CEU | PRAMEF5 | 13404198 | 0       | 0      | 0       |
| CEU | PRAMEF5 | 13409198 | 2.965   | 1.8762 | 1.3862  |
| CEU | PRAMEF5 | 13414198 | 2.965   | 1.8762 | 1.3862  |
| CEU | PRAMEF5 | 13419198 | 0.4096  | 0.1706 | 1.4197  |
| CEU | PRAMEF5 | 13424198 | 0.4877  | 0.3411 | 0.5877  |
| CEU | PRAMEF5 | 13429198 | 0.1563  | 0.3411 | -0.7408 |
| CEU | PRAMEF5 | 13434198 | 0.0781  | 0.1706 | -0.5495 |
| CEU | PRAMEF5 | 13439198 | 0       | 0      | 0       |
| CEU | PRAMEF5 | 13444198 | 1.3636  | 1.1939 | 0.3024  |
| CEU | PRAMEF5 | 13449198 | 1.3636  | 1.1939 | 0.3024  |
| CEU | PRAMEF5 | 13454198 | 0.6135  | 0.6822 | -0.1794 |
| CEU | PRAMEF5 | 13459198 | 0.6135  | 0.6822 | -0.1794 |
| CEU | PRAMEF5 | 13464198 | 1.9272  | 1.5351 | 0.5814  |
| CEU | PRAMEF5 | 13469198 | 1.9272  | 1.5351 | 0.5814  |
| CEU | PRAMEF5 | 13474198 | 0.5259  | 1.3645 | -1.3567 |
| CEU | PRAMEF5 | 13479198 | 4.5984  | 4.6052 | -0.0041 |
| CEU | PRAMEF5 | 13484198 | 8.498   | 7.3342 | 0.4663  |
| CEU | PRAMEF5 | 13489198 | 4.6557  | 4.2641 | 0.2542  |
| CEU | PRAMEF5 | 13494198 | 2.1754  | 2.2173 | -0.0468 |
| CEU | PRAMEF5 | 13499198 | 2.8409  | 2.8996 | -0.0528 |
| CEU | PRAMEF5 | 13504198 | 1.1538  | 1.3645 | -0.3409 |
| CEU | PRAMEF5 | 13509198 | 1.2997  | 1.1939 | 0.1885  |
| CEU | PRAMEF5 | 13514198 | 2.8637  | 3.7524 | -0.6438 |
| CEU | PRAMEF5 | 13519198 | 1.8322  | 3.2407 | -1.1549 |
| CEU | PRAMEF5 | 13524198 | 0.0101  | 0.1706 | -0.9534 |
| CEU | PRAMEF5 | 13529198 | 0       | 0      | 0       |
| CEU | PRAMEF5 | 13534198 | 1.6549  | 1.3645 | 0.4698  |
| CEU | PRAMEF5 | 13539198 | 1.9553  | 1.5351 | 0.6231  |
| CEU | PRAMEF5 | 13544198 | 0.3004  | 0.1706 | 0.771   |
| CEU | PRAMEF5 | 13549198 | 1.3418  | 0.8528 | 1.1012  |
| CEU | PRAMEF5 | 13554198 | 1.517   | 1.0234 | 0.9808  |
| CEU | PRAMEF5 | 13559198 | 0.1752  | 0.1706 | 0.0273  |
| CEU | PRAMEF5 | 13564198 | 0       | 0      | 0       |



## 2\_TajimasD\_data

|     |         |          |         |         |         |
|-----|---------|----------|---------|---------|---------|
| CEU | PRAMEF5 | 13569198 | 0       | 0       | 0       |
| CEU | PRAMEF5 | 13574198 | 0       | 0       | 0       |
| CEU | PRAMEF5 | 13579198 | 0       | 0       | 0       |
| CEU | PRAMEF5 | 13584198 | 0       | 0       | 0       |
| CEU | PRAMEF5 | 13589198 | 0       | 0       | 0       |
| CEU | PRAMEF5 | 13594198 | 0       | 0       | 0       |
| CEU | PRAMEF5 | 13599198 | 0       | 0       | 0       |
| CEU | PRAMEF5 | 13604198 | 0       | 0       | 0       |
| CEU | PRAMEF5 | 13609198 | 0       | 0       | 0       |
| CEU | PRAMEF5 | 13614198 | 0       | 0       | 0       |
| CEU | PRAMEF5 | 13619198 | 0       | 0       | 0       |
| CEU | PRAMEF5 | 13624198 | 0       | 0       | 0       |
| CEU | PRAMEF5 | 13629198 | 0       | 0       | 0       |
| CEU | PRAMEF5 | 13634198 | 1.4345  | 3.0701  | -1.403  |
| CEU | PRAMEF5 | 13639198 | 1.6079  | 3.4112  | -1.4163 |
| CEU | PRAMEF5 | 13644198 | 0.1934  | 0.5117  | -0.9983 |
| CEU | PRAMEF5 | 13649198 | 0.0301  | 0.3411  | -1.2467 |
| CEU | PRAMEF5 | 13654198 | 0.0101  | 0.1706  | -0.9534 |
| CEU | PRAMEF5 | 13659198 | 0.0101  | 0.1706  | -0.9534 |
| CEU | PRAMEF5 | 13664198 | 0.0884  | 0.3411  | -1.013  |
| CEU | PRAMEF5 | 13669198 | 1.5242  | 0.6822  | 2.1987  |
| CEU | PRAMEF5 | 13674198 | 1.5452  | 0.8528  | 1.5593  |
| CEU | PRAMEF5 | 13679198 | 0.0994  | 0.3411  | -0.9689 |
| CEU | PRAMEF5 | 13684198 | 0.1769  | 0.6822  | -1.3195 |
| CEU | PRAMEF5 | 13689198 | 0.1769  | 0.6822  | -1.3195 |
| CEU | PRAMEF5 | 13694198 | 0.86    | 2.2173  | -1.5164 |
| CEU | PRAMEF5 | 13699198 | 2.9186  | 4.6052  | -1.024  |
| CEU | PRAMEF5 | 13704198 | 2.724   | 3.9229  | -0.8362 |
| CEU | PRAMEF5 | 13709198 | 1.6706  | 2.2173  | -0.6108 |
| CEU | PRAMEF5 | 13714198 | 3.2426  | 4.0935  | -0.5722 |
| CEU | PRAMEF5 | 13719198 | 3.5615  | 4.6052  | -0.6337 |
| CEU | PRAMEF5 | 13724198 | 1.3342  | 1.3645  | -0.049  |
| CEU | PRAMEF5 | 13729198 | 1.5325  | 1.1939  | 0.6034  |
| CEU | PRAMEF5 | 13734198 | 2.6024  | 1.7056  | 1.2283  |
| CEU | PRAMEF5 | 13739198 | 1.8578  | 1.3645  | 0.7981  |
| CEU | PRAMEF5 | 13744198 | 0.7879  | 0.8528  | -0.1462 |
| CEU | PRAMEF5 | 13749198 | 0.0101  | 0.1706  | -0.9534 |
| CEU | PRAMEF5 | 13754198 | 0       | 0       | 0       |
| CHB | PRAMEF5 | 12759198 | 8.9355  | 9.1484  | -0.0694 |
| CHB | PRAMEF5 | 12764198 | 7.8287  | 9.1484  | -0.4303 |
| CHB | PRAMEF5 | 12769198 | 9.3625  | 9.6567  | -0.0912 |
| CHB | PRAMEF5 | 12774198 | 12.3111 | 12.0285 | 0.0713  |
| CHB | PRAMEF5 | 12779198 | 11.5275 | 12.7061 | -0.2825 |
| CHB | PRAMEF5 | 12784198 | 11.9623 | 13.2144 | -0.2892 |
| CHB | PRAMEF5 | 12789198 | 10.8064 | 12.1979 | -0.3467 |
| CHB | PRAMEF5 | 12794198 | 10.2214 | 10.8426 | -0.1729 |
| CHB | PRAMEF5 | 12799198 | 13.2633 | 12.5367 | 0.1764  |
| CHB | PRAMEF5 | 12804198 | 9.9747  | 12.0285 | -0.5185 |
| CHB | PRAMEF5 | 12809198 | 4.5228  | 9.9955  | -1.6433 |

## 2\_TajimasD\_data

|     |         |          |         |         |         |
|-----|---------|----------|---------|---------|---------|
| CHB | PRAMEF5 | 12814198 | 7.0865  | 10.3343 | -0.9454 |
| CHB | PRAMEF5 | 12819198 | 10.1972 | 11.012  | -0.2235 |
| CHB | PRAMEF5 | 12824198 | 10.0219 | 11.3508 | -0.3543 |
| CHB | PRAMEF5 | 12829198 | 11.2223 | 12.8755 | -0.3914 |
| CHB | PRAMEF5 | 12834198 | 8.4507  | 15.0779 | -1.3506 |
| CHB | PRAMEF5 | 12839198 | 6.4954  | 12.7061 | -1.4889 |
| CHB | PRAMEF5 | 12844198 | 8.7344  | 10.5037 | -0.5073 |
| CHB | PRAMEF5 | 12849198 | 14.4055 | 15.2474 | -0.1698 |
| CHB | PRAMEF5 | 12854198 | 20.2016 | 20.3298 | -0.0196 |
| CHB | PRAMEF5 | 12859198 | 19.4961 | 22.5322 | -0.4207 |
| CHB | PRAMEF5 | 12864198 | 23.0859 | 44.7256 | -1.5356 |
| CHB | PRAMEF5 | 12869198 | 23.9692 | 56.2458 | -1.8276 |
| CHB | PRAMEF5 | 12874198 | 13.6208 | 28.97   | -1.6662 |
| CHB | PRAMEF5 | 12879198 | 10.7322 | 15.0779 | -0.8856 |
| CHB | PRAMEF5 | 12884198 | 16.2793 | 19.8216 | -0.5554 |
| CHB | PRAMEF5 | 12889198 | 18.3526 | 18.2968 | 0.0094  |
| CHB | PRAMEF5 | 12894198 | 30.365  | 24.7346 | 0.7127  |
| CHB | PRAMEF5 | 12899198 | 31.5904 | 24.3958 | 0.923   |
| CHB | PRAMEF5 | 12904198 | 16.4377 | 14.7391 | 0.3537  |
| CHB | PRAMEF5 | 12909198 | 28.4412 | 20.4992 | 1.2056  |
| CHB | PRAMEF5 | 12914198 | 37.4242 | 26.937  | 1.222   |
| CHB | PRAMEF5 | 12919198 | 28.4645 | 26.0899 | 0.2854  |
| CHB | PRAMEF5 | 12924198 | 17.1207 | 16.7721 | 0.0642  |
| CHB | PRAMEF5 | 12929198 | 8.4555  | 7.7931  | 0.2504  |
| CHB | PRAMEF5 | 12934198 | 6.3073  | 7.6237  | -0.5076 |
| CHB | PRAMEF5 | 12939198 | 10.9457 | 17.4498 | -1.1527 |
| CHB | PRAMEF5 | 12944198 | 13.5829 | 20.4992 | -1.0499 |
| CHB | PRAMEF5 | 12949198 | 6.9596  | 13.2144 | -1.4448 |
| CHB | PRAMEF5 | 12954198 | 3.7339  | 9.9955  | -1.8802 |
| CHB | PRAMEF5 | 12959198 | 3.4972  | 5.4213  | -1.0089 |
| CHB | PRAMEF5 | 12964198 | 2.4959  | 3.2189  | -0.5944 |
| CHB | PRAMEF5 | 12969198 | 0.2031  | 2.5412  | -2.3348 |
| CHB | PRAMEF5 | 12974198 | 0.1729  | 1.6942  | -2.0878 |
| CHB | PRAMEF5 | 12979198 | 1.0289  | 3.3883  | -1.8581 |
| CHB | PRAMEF5 | 12984198 | 3.9802  | 6.4378  | -1.105  |
| CHB | PRAMEF5 | 12989198 | 4.0624  | 5.7601  | -0.8435 |
| CHB | PRAMEF5 | 12994198 | 1.7207  | 4.2354  | -1.6371 |
| CHB | PRAMEF5 | 12999198 | 1.8736  | 4.5742  | -1.6445 |
| CHB | PRAMEF5 | 13004198 | 1.6701  | 2.7106  | -0.9859 |
| CHB | PRAMEF5 | 13009198 | 2.7401  | 3.3883  | -0.5105 |
| CHB | PRAMEF5 | 13014198 | 2.8325  | 4.4048  | -0.9894 |
| CHB | PRAMEF5 | 13019198 | 0.7354  | 2.033   | -1.5474 |
| CHB | PRAMEF5 | 13024198 | 0.1319  | 0.6777  | -1.4269 |
| CHB | PRAMEF5 | 13029198 | 0       | 0       | 0       |
| CHB | PRAMEF5 | 13034198 | 0.5347  | 1.0165  | -0.9588 |
| CHB | PRAMEF5 | 13039198 | 4.1017  | 2.7106  | 1.3181  |
| CHB | PRAMEF5 | 13044198 | 7.9547  | 5.2519  | 1.4577  |
| CHB | PRAMEF5 | 13049198 | 12.6674 | 10.3343 | 0.6791  |
| CHB | PRAMEF5 | 13054198 | 8.2796  | 6.7766  | 0.6452  |

## 2\_TajimasD\_data

|     |         |          |         |         |         |
|-----|---------|----------|---------|---------|---------|
| CHB | PRAMEF5 | 13059198 | 0       | 0       | 0       |
| CHB | PRAMEF5 | 13064198 | 0       | 0       | 0       |
| CHB | PRAMEF5 | 13069198 | 0       | 0       | 0       |
| CHB | PRAMEF5 | 13074198 | 0       | 0       | 0       |
| CHB | PRAMEF5 | 13079198 | 0       | 0       | 0       |
| CHB | PRAMEF5 | 13084198 | 0       | 0       | 0       |
| CHB | PRAMEF5 | 13089198 | 0       | 0       | 0       |
| CHB | PRAMEF5 | 13094198 | 0       | 0       | 0       |
| CHB | PRAMEF5 | 13099198 | 0       | 0       | 0       |
| CHB | PRAMEF5 | 13104198 | 0.4826  | 0.3388  | 0.5768  |
| CHB | PRAMEF5 | 13109198 | 1.2136  | 0.6777  | 1.401   |
| CHB | PRAMEF5 | 13114198 | 0.731   | 0.3388  | 1.5732  |
| CHB | PRAMEF5 | 13119198 | 4.1167  | 3.8965  | 0.154   |
| CHB | PRAMEF5 | 13124198 | 7.5738  | 12.8755 | -1.2551 |
| CHB | PRAMEF5 | 13129198 | 10.5648 | 15.2474 | -0.9442 |
| CHB | PRAMEF5 | 13134198 | 7.7598  | 7.7931  | -0.0126 |
| CHB | PRAMEF5 | 13139198 | 5.372   | 4.7436  | 0.3707  |
| CHB | PRAMEF5 | 13144198 | 8.5722  | 5.9295  | 1.2794  |
| CHB | PRAMEF5 | 13149198 | 5.3075  | 3.8965  | 0.9869  |
| CHB | PRAMEF5 | 13154198 | 2.564   | 2.5412  | 0.0228  |
| CHB | PRAMEF5 | 13159198 | 1.2699  | 2.2024  | -1.0441 |
| CHB | PRAMEF5 | 13164198 | 1.1369  | 2.033   | -1.0686 |
| CHB | PRAMEF5 | 13169198 | 4.736   | 4.7436  | -0.0045 |
| CHB | PRAMEF5 | 13174198 | 14.2328 | 13.892  | 0.0751  |
| CHB | PRAMEF5 | 13179198 | 30.8412 | 24.0569 | 0.8822  |
| CHB | PRAMEF5 | 13184198 | 29.8528 | 21.6851 | 1.1744  |
| CHB | PRAMEF5 | 13189198 | 10.6115 | 9.3178  | 0.4147  |
| CHB | PRAMEF5 | 13194198 | 2.5629  | 3.3883  | -0.65   |
| CHB | PRAMEF5 | 13199198 | 2.2937  | 3.5577  | -0.9553 |
| CHB | PRAMEF5 | 13204198 | 1.6377  | 3.0495  | -1.2142 |
| CHB | PRAMEF5 | 13209198 | 1.1411  | 2.8801  | -1.5679 |
| CHB | PRAMEF5 | 13214198 | 2.6781  | 3.5577  | -0.6648 |
| CHB | PRAMEF5 | 13219198 | 2.3842  | 2.7106  | -0.3093 |
| CHB | PRAMEF5 | 13224198 | 0.0676  | 0.5082  | -1.3831 |
| CHB | PRAMEF5 | 13229198 | 0       | 0       | 0       |
| CHB | PRAMEF5 | 13234198 | 0       | 0       | 0       |
| CHB | PRAMEF5 | 13239198 | 0       | 0       | 0       |
| CHB | PRAMEF5 | 13244198 | 0       | 0       | 0       |
| CHB | PRAMEF5 | 13249198 | 0       | 0       | 0       |
| CHB | PRAMEF5 | 13254198 | 0       | 0       | 0       |
| CHB | PRAMEF5 | 13259198 | 0       | 0       | 0       |
| CHB | PRAMEF5 | 13264198 | 0       | 0       | 0       |
| CHB | PRAMEF5 | 13269198 | 0       | 0       | 0       |
| CHB | PRAMEF5 | 13274198 | 0       | 0       | 0       |
| CHB | PRAMEF5 | 13279198 | 0       | 0       | 0       |
| CHB | PRAMEF5 | 13284198 | 0       | 0       | 0       |
| CHB | PRAMEF5 | 13289198 | 0       | 0       | 0       |
| CHB | PRAMEF5 | 13294198 | 0       | 0       | 0       |
| CHB | PRAMEF5 | 13299198 | 0       | 0       | 0       |

## 2\_TajimasD\_data

|     |         |          |         |        |         |
|-----|---------|----------|---------|--------|---------|
| CHB | PRAMEF5 | 13304198 | 0       | 0      | 0       |
| CHB | PRAMEF5 | 13309198 | 0       | 0      | 0       |
| CHB | PRAMEF5 | 13314198 | 0       | 0      | 0       |
| CHB | PRAMEF5 | 13319198 | 0       | 0      | 0       |
| CHB | PRAMEF5 | 13324198 | 2.1072  | 1.6942 | 0.5668  |
| CHB | PRAMEF5 | 13329198 | 2.4717  | 2.3718 | 0.1055  |
| CHB | PRAMEF5 | 13334198 | 0.3646  | 1.1859 | -1.466  |
| CHB | PRAMEF5 | 13339198 | 0       | 0.5082 | -1.5953 |
| CHB | PRAMEF5 | 13344198 | 1.0364  | 2.033  | -1.1885 |
| CHB | PRAMEF5 | 13349198 | 3.7723  | 7.4543 | -1.4493 |
| CHB | PRAMEF5 | 13354198 | 2.7938  | 5.9295 | -1.518  |
| CHB | PRAMEF5 | 13359198 | 0.0579  | 0.5082 | -1.4136 |
| CHB | PRAMEF5 | 13364198 | 1.4748  | 0.8471 | 1.4155  |
| CHB | PRAMEF5 | 13369198 | 1.4748  | 0.8471 | 1.4155  |
| CHB | PRAMEF5 | 13374198 | 4.2501  | 2.3718 | 1.9827  |
| CHB | PRAMEF5 | 13379198 | 12.7144 | 8.8096 | 1.3184  |
| CHB | PRAMEF5 | 13384198 | 11.2064 | 8.6402 | 0.8821  |
| CHB | PRAMEF5 | 13389198 | 2.7421  | 2.2024 | 0.6043  |
| CHB | PRAMEF5 | 13394198 | 0       | 0      | 0       |
| CHB | PRAMEF5 | 13399198 | 0       | 0      | 0       |
| CHB | PRAMEF5 | 13404198 | 0       | 0      | 0       |
| CHB | PRAMEF5 | 13409198 | 3.276   | 2.5412 | 0.7338  |
| CHB | PRAMEF5 | 13414198 | 3.276   | 2.5412 | 0.7338  |
| CHB | PRAMEF5 | 13419198 | 0.3811  | 0.1694 | 1.258   |
| CHB | PRAMEF5 | 13424198 | 0.8094  | 0.3388 | 1.8877  |
| CHB | PRAMEF5 | 13429198 | 0.8567  | 0.3388 | 2.0775  |
| CHB | PRAMEF5 | 13434198 | 0.4283  | 0.1694 | 1.5384  |
| CHB | PRAMEF5 | 13439198 | 0       | 0      | 0       |
| CHB | PRAMEF5 | 13444198 | 1.0632  | 1.1859 | -0.219  |
| CHB | PRAMEF5 | 13449198 | 1.0632  | 1.1859 | -0.219  |
| CHB | PRAMEF5 | 13454198 | 1.0069  | 0.6777 | 0.8606  |
| CHB | PRAMEF5 | 13459198 | 1.0069  | 0.6777 | 0.8606  |
| CHB | PRAMEF5 | 13464198 | 2.1256  | 1.5247 | 0.8927  |
| CHB | PRAMEF5 | 13469198 | 2.1256  | 1.5247 | 0.8927  |
| CHB | PRAMEF5 | 13474198 | 2.3057  | 1.3553 | 1.5403  |
| CHB | PRAMEF5 | 13479198 | 8.0261  | 4.913  | 1.7807  |
| CHB | PRAMEF5 | 13484198 | 11.679  | 7.4543 | 1.663   |
| CHB | PRAMEF5 | 13489198 | 6.0247  | 4.2354 | 1.1648  |
| CHB | PRAMEF5 | 13494198 | 2.4137  | 2.2024 | 0.2366  |
| CHB | PRAMEF5 | 13499198 | 3.4026  | 2.5412 | 0.8602  |
| CHB | PRAMEF5 | 13504198 | 1.3021  | 1.0165 | 0.5684  |
| CHB | PRAMEF5 | 13509198 | 0.8666  | 0.6777 | 0.4938  |
| CHB | PRAMEF5 | 13514198 | 2.2886  | 3.2189 | -0.7648 |
| CHB | PRAMEF5 | 13519198 | 1.6789  | 3.0495 | -1.1787 |
| CHB | PRAMEF5 | 13524198 | 0.0097  | 0.1694 | -0.949  |
| CHB | PRAMEF5 | 13529198 | 0       | 0      | 0       |
| CHB | PRAMEF5 | 13534198 | 1.6981  | 1.1859 | 0.9143  |
| CHB | PRAMEF5 | 13539198 | 2.0742  | 1.5247 | 0.8164  |
| CHB | PRAMEF5 | 13544198 | 0.3762  | 0.3388 | 0.15    |

## 2\_TajimasD\_data

|     |         |          |         |         |         |
|-----|---------|----------|---------|---------|---------|
| CHB | PRAMEF5 | 13549198 | 0.786   | 1.1859  | -0.7138 |
| CHB | PRAMEF5 | 13554198 | 0.9235  | 1.5247  | -0.8932 |
| CHB | PRAMEF5 | 13559198 | 0.1374  | 0.3388  | -0.8079 |
| CHB | PRAMEF5 | 13564198 | 0       | 0       | 0       |
| CHB | PRAMEF5 | 13569198 | 0       | 0       | 0       |
| CHB | PRAMEF5 | 13574198 | 0       | 0       | 0       |
| CHB | PRAMEF5 | 13579198 | 0       | 0       | 0       |
| CHB | PRAMEF5 | 13584198 | 0       | 0       | 0       |
| CHB | PRAMEF5 | 13589198 | 0       | 0       | 0       |
| CHB | PRAMEF5 | 13594198 | 0       | 0       | 0       |
| CHB | PRAMEF5 | 13599198 | 0       | 0       | 0       |
| CHB | PRAMEF5 | 13604198 | 0       | 0       | 0       |
| CHB | PRAMEF5 | 13609198 | 0       | 0       | 0       |
| CHB | PRAMEF5 | 13614198 | 0       | 0       | 0       |
| CHB | PRAMEF5 | 13619198 | 0       | 0       | 0       |
| CHB | PRAMEF5 | 13624198 | 0       | 0       | 0       |
| CHB | PRAMEF5 | 13629198 | 0       | 0       | 0       |
| CHB | PRAMEF5 | 13634198 | 0.9098  | 2.5412  | -1.6291 |
| CHB | PRAMEF5 | 13639198 | 1.6926  | 2.8801  | -1.0707 |
| CHB | PRAMEF5 | 13644198 | 0.9018  | 0.5082  | 1.2356  |
| CHB | PRAMEF5 | 13649198 | 0.1287  | 0.3388  | -0.8428 |
| CHB | PRAMEF5 | 13654198 | 0.0097  | 0.1694  | -0.949  |
| CHB | PRAMEF5 | 13659198 | 0       | 0       | 0       |
| CHB | PRAMEF5 | 13664198 | 0.0952  | 0.5082  | -1.2965 |
| CHB | PRAMEF5 | 13669198 | 1.3333  | 1.1859  | 0.2631  |
| CHB | PRAMEF5 | 13674198 | 1.3147  | 1.0165  | 0.5934  |
| CHB | PRAMEF5 | 13679198 | 0.0765  | 0.3388  | -1.0522 |
| CHB | PRAMEF5 | 13684198 | 0.189   | 0.6777  | -1.2776 |
| CHB | PRAMEF5 | 13689198 | 0.189   | 0.6777  | -1.2776 |
| CHB | PRAMEF5 | 13694198 | 0.5146  | 2.2024  | -1.8899 |
| CHB | PRAMEF5 | 13699198 | 2.9682  | 4.913   | -1.1124 |
| CHB | PRAMEF5 | 13704198 | 3.0088  | 3.3883  | -0.2989 |
| CHB | PRAMEF5 | 13709198 | 1.6217  | 1.6942  | -0.0995 |
| CHB | PRAMEF5 | 13714198 | 3.5427  | 4.7436  | -0.7084 |
| CHB | PRAMEF5 | 13719198 | 3.5905  | 5.2519  | -0.896  |
| CHB | PRAMEF5 | 13724198 | 1.1338  | 1.8636  | -0.9311 |
| CHB | PRAMEF5 | 13729198 | 1.2646  | 1.1859  | 0.1405  |
| CHB | PRAMEF5 | 13734198 | 2.1504  | 1.6942  | 0.6261  |
| CHB | PRAMEF5 | 13739198 | 1.6655  | 1.8636  | -0.2527 |
| CHB | PRAMEF5 | 13744198 | 0.77    | 1.1859  | -0.7424 |
| CHB | PRAMEF5 | 13749198 | 0.0097  | 0.1694  | -0.949  |
| CHB | PRAMEF5 | 13754198 | 0       | 0       | 0       |
| YRI | PRAMEF5 | 12759198 | 10.0804 | 14.6214 | -0.9497 |
| YRI | PRAMEF5 | 12764198 | 9.9656  | 14.4534 | -0.9489 |
| YRI | PRAMEF5 | 12769198 | 12.3696 | 16.302  | -0.7413 |
| YRI | PRAMEF5 | 12774198 | 15.2815 | 18.823  | -0.5817 |
| YRI | PRAMEF5 | 12779198 | 15.4029 | 18.3188 | -0.4916 |
| YRI | PRAMEF5 | 12784198 | 17.2346 | 17.3104 | -0.0135 |
| YRI | PRAMEF5 | 12789198 | 17.3991 | 17.1423 | 0.0461  |

## 2\_TajimasD\_data

|     |         |          |         |         |         |
|-----|---------|----------|---------|---------|---------|
| YRI | PRAMEF5 | 12794198 | 16.2377 | 15.4617 | 0.1539  |
| YRI | PRAMEF5 | 12799198 | 19.5625 | 15.9659 | 0.6917  |
| YRI | PRAMEF5 | 12804198 | 19.294  | 17.3104 | 0.3531  |
| YRI | PRAMEF5 | 12809198 | 16.3719 | 16.4701 | -0.0183 |
| YRI | PRAMEF5 | 12814198 | 15.1837 | 14.4534 | 0.1544  |
| YRI | PRAMEF5 | 12819198 | 13.1998 | 14.7895 | -0.3289 |
| YRI | PRAMEF5 | 12824198 | 11.8048 | 15.4617 | -0.7251 |
| YRI | PRAMEF5 | 12829198 | 13.6263 | 14.6214 | -0.2081 |
| YRI | PRAMEF5 | 12834198 | 11.8817 | 14.2853 | -0.5139 |
| YRI | PRAMEF5 | 12839198 | 8.0802  | 12.1005 | -1.0058 |
| YRI | PRAMEF5 | 12844198 | 9.9354  | 13.1089 | -0.7361 |
| YRI | PRAMEF5 | 12849198 | 15.5728 | 18.4868 | -0.487  |
| YRI | PRAMEF5 | 12854198 | 18.7308 | 21.8481 | -0.4435 |
| YRI | PRAMEF5 | 12859198 | 17.4108 | 20.3355 | -0.4459 |
| YRI | PRAMEF5 | 12864198 | 13.2579 | 14.7895 | -0.3168 |
| YRI | PRAMEF5 | 12869198 | 11.6557 | 13.1089 | -0.3371 |
| YRI | PRAMEF5 | 12874198 | 13.7236 | 15.2937 | -0.3146 |
| YRI | PRAMEF5 | 12879198 | 19.3686 | 20.3355 | -0.1474 |
| YRI | PRAMEF5 | 12884198 | 26.3679 | 29.5789 | -0.3404 |
| YRI | PRAMEF5 | 12889198 | 25.1264 | 30.5873 | -0.5603 |
| YRI | PRAMEF5 | 12894198 | 26.0582 | 33.2763 | -0.6822 |
| YRI | PRAMEF5 | 12899198 | 22.0019 | 34.1166 | -1.1173 |
| YRI | PRAMEF5 | 12904198 | 11.5667 | 23.5287 | -1.584  |
| YRI | PRAMEF5 | 12909198 | 13.8898 | 24.8732 | -1.3782 |
| YRI | PRAMEF5 | 12914198 | 21.4352 | 31.0915 | -0.9752 |
| YRI | PRAMEF5 | 12919198 | 25.0015 | 29.0748 | -0.4391 |
| YRI | PRAMEF5 | 12924198 | 17.529  | 19.8313 | -0.3596 |
| YRI | PRAMEF5 | 12929198 | 10.666  | 13.9492 | -0.718  |
| YRI | PRAMEF5 | 12934198 | 8.9148  | 14.9575 | -1.2367 |
| YRI | PRAMEF5 | 12939198 | 17.6498 | 23.8648 | -0.8118 |
| YRI | PRAMEF5 | 12944198 | 25.1968 | 32.9402 | -0.7391 |
| YRI | PRAMEF5 | 12949198 | 12.8835 | 23.0245 | -1.3714 |
| YRI | PRAMEF5 | 12954198 | 5.5903  | 13.445  | -1.7789 |
| YRI | PRAMEF5 | 12959198 | 4.9301  | 9.2434  | -1.3881 |
| YRI | PRAMEF5 | 12964198 | 2.971   | 4.5377  | -0.9573 |
| YRI | PRAMEF5 | 12969198 | 1.9928  | 3.6974  | -1.2424 |
| YRI | PRAMEF5 | 12974198 | 1.0132  | 2.5209  | -1.5099 |
| YRI | PRAMEF5 | 12979198 | 1.5041  | 4.3696  | -1.8093 |
| YRI | PRAMEF5 | 12984198 | 5.7366  | 8.5712  | -0.9782 |
| YRI | PRAMEF5 | 12989198 | 7.7049  | 7.3947  | 0.1226  |
| YRI | PRAMEF5 | 12994198 | 6.2908  | 6.0502  | 0.114   |
| YRI | PRAMEF5 | 12999198 | 5.4384  | 5.7141  | -0.1375 |
| YRI | PRAMEF5 | 13004198 | 3.0587  | 2.689   | 0.3513  |
| YRI | PRAMEF5 | 13009198 | 5.616   | 5.5461  | 0.0358  |
| YRI | PRAMEF5 | 13014198 | 7.0231  | 6.5544  | 0.2066  |
| YRI | PRAMEF5 | 13019198 | 2.1032  | 1.8487  | 0.3255  |
| YRI | PRAMEF5 | 13024198 | 0.1841  | 0.3361  | -0.6102 |
| YRI | PRAMEF5 | 13029198 | 0.1585  | 0.6722  | -1.3448 |
| YRI | PRAMEF5 | 13034198 | 0.7626  | 2.0167  | -1.4995 |

## 2\_TajimasD\_data

|     |         |          |         |         |         |
|-----|---------|----------|---------|---------|---------|
| YRI | PRAMEF5 | 13039198 | 3.066   | 3.8654  | -0.561  |
| YRI | PRAMEF5 | 13044198 | 5.2072  | 7.8989  | -1.0014 |
| YRI | PRAMEF5 | 13049198 | 6.7103  | 15.2937 | -1.7199 |
| YRI | PRAMEF5 | 13054198 | 3.965   | 9.9157  | -1.7941 |
| YRI | PRAMEF5 | 13059198 | 0       | 0       | 0       |
| YRI | PRAMEF5 | 13064198 | 0       | 0       | 0       |
| YRI | PRAMEF5 | 13069198 | 0       | 0       | 0       |
| YRI | PRAMEF5 | 13074198 | 0       | 0       | 0       |
| YRI | PRAMEF5 | 13079198 | 0       | 0       | 0       |
| YRI | PRAMEF5 | 13084198 | 0       | 0       | 0       |
| YRI | PRAMEF5 | 13089198 | 0       | 0       | 0       |
| YRI | PRAMEF5 | 13094198 | 0       | 0       | 0       |
| YRI | PRAMEF5 | 13099198 | 0       | 0       | 0       |
| YRI | PRAMEF5 | 13104198 | 0.4735  | 0.1681  | 1.8155  |
| YRI | PRAMEF5 | 13109198 | 1.9676  | 2.3529  | -0.4079 |
| YRI | PRAMEF5 | 13114198 | 1.5219  | 2.689   | -1.1092 |
| YRI | PRAMEF5 | 13119198 | 2.2505  | 4.0335  | -1.2064 |
| YRI | PRAMEF5 | 13124198 | 10.9001 | 12.2685 | -0.3379 |
| YRI | PRAMEF5 | 13129198 | 18.82   | 16.8062 | 0.3687  |
| YRI | PRAMEF5 | 13134198 | 12.1218 | 10.2518 | 0.5466  |
| YRI | PRAMEF5 | 13139198 | 7.2847  | 6.2183  | 0.493   |
| YRI | PRAMEF5 | 13144198 | 6.2958  | 6.7225  | -0.1839 |
| YRI | PRAMEF5 | 13149198 | 1.6814  | 3.6974  | -1.4694 |
| YRI | PRAMEF5 | 13154198 | 1.8608  | 2.8571  | -0.901  |
| YRI | PRAMEF5 | 13159198 | 1.4263  | 2.8571  | -1.2939 |
| YRI | PRAMEF5 | 13164198 | 1.6038  | 2.1848  | -0.6523 |
| YRI | PRAMEF5 | 13169198 | 5.1231  | 4.7057  | 0.2471  |
| YRI | PRAMEF5 | 13174198 | 11.54   | 14.9575 | -0.6994 |
| YRI | PRAMEF5 | 13179198 | 17.2254 | 28.7386 | -1.2554 |
| YRI | PRAMEF5 | 13184198 | 17.8907 | 26.2177 | -0.9928 |
| YRI | PRAMEF5 | 13189198 | 10.8943 | 11.0921 | -0.0537 |
| YRI | PRAMEF5 | 13194198 | 3.6936  | 4.2016  | -0.3318 |
| YRI | PRAMEF5 | 13199198 | 2.8495  | 5.0419  | -1.2215 |
| YRI | PRAMEF5 | 13204198 | 3.6062  | 5.378   | -0.9325 |
| YRI | PRAMEF5 | 13209198 | 3.175   | 4.8738  | -0.9752 |
| YRI | PRAMEF5 | 13214198 | 2.1314  | 4.7057  | -1.5239 |
| YRI | PRAMEF5 | 13219198 | 1.2436  | 2.689   | -1.3737 |
| YRI | PRAMEF5 | 13224198 | 0.3019  | 0.5042  | -0.6358 |
| YRI | PRAMEF5 | 13229198 | 0       | 0       | 0       |
| YRI | PRAMEF5 | 13234198 | 0       | 0       | 0       |
| YRI | PRAMEF5 | 13239198 | 0       | 0       | 0       |
| YRI | PRAMEF5 | 13244198 | 0       | 0       | 0       |
| YRI | PRAMEF5 | 13249198 | 0       | 0       | 0       |
| YRI | PRAMEF5 | 13254198 | 0       | 0       | 0       |
| YRI | PRAMEF5 | 13259198 | 0       | 0       | 0       |
| YRI | PRAMEF5 | 13264198 | 0       | 0       | 0       |
| YRI | PRAMEF5 | 13269198 | 0       | 0       | 0       |
| YRI | PRAMEF5 | 13274198 | 0       | 0       | 0       |
| YRI | PRAMEF5 | 13279198 | 0       | 0       | 0       |

## 2\_TajimasD\_data

|     |         |          |         |         |         |
|-----|---------|----------|---------|---------|---------|
| YRI | PRAMEF5 | 13284198 | 0       | 0       | 0       |
| YRI | PRAMEF5 | 13289198 | 0       | 0       | 0       |
| YRI | PRAMEF5 | 13294198 | 0       | 0       | 0       |
| YRI | PRAMEF5 | 13299198 | 0       | 0       | 0       |
| YRI | PRAMEF5 | 13304198 | 0       | 0       | 0       |
| YRI | PRAMEF5 | 13309198 | 0       | 0       | 0       |
| YRI | PRAMEF5 | 13314198 | 0       | 0       | 0       |
| YRI | PRAMEF5 | 13319198 | 0       | 0       | 0       |
| YRI | PRAMEF5 | 13324198 | 1.1077  | 2.0167  | -1.0868 |
| YRI | PRAMEF5 | 13329198 | 1.4065  | 2.5209  | -1.116  |
| YRI | PRAMEF5 | 13334198 | 0.3265  | 1.0084  | -1.3595 |
| YRI | PRAMEF5 | 13339198 | 0.0278  | 0.5042  | -1.4972 |
| YRI | PRAMEF5 | 13344198 | 1.24    | 2.0167  | -0.9287 |
| YRI | PRAMEF5 | 13349198 | 5.4184  | 9.5795  | -1.2955 |
| YRI | PRAMEF5 | 13354198 | 4.6207  | 8.235   | -1.2941 |
| YRI | PRAMEF5 | 13359198 | 0.4424  | 0.6722  | -0.6016 |
| YRI | PRAMEF5 | 13364198 | 1.5663  | 1.3445  | 0.3602  |
| YRI | PRAMEF5 | 13369198 | 1.702   | 1.5126  | 0.282   |
| YRI | PRAMEF5 | 13374198 | 3.7004  | 5.7141  | -1.0041 |
| YRI | PRAMEF5 | 13379198 | 10.8171 | 11.9324 | -0.2827 |
| YRI | PRAMEF5 | 13384198 | 11.4277 | 10.0837 | 0.3989  |
| YRI | PRAMEF5 | 13389198 | 4.1753  | 3.6974  | 0.3483  |
| YRI | PRAMEF5 | 13394198 | 0       | 0       | 0       |
| YRI | PRAMEF5 | 13399198 | 0       | 0       | 0       |
| YRI | PRAMEF5 | 13404198 | 0       | 0       | 0       |
| YRI | PRAMEF5 | 13409198 | 3.1076  | 2.3529  | 0.7989  |
| YRI | PRAMEF5 | 13414198 | 3.1168  | 2.5209  | 0.5968  |
| YRI | PRAMEF5 | 13419198 | 0.0636  | 0.3361  | -1.094  |
| YRI | PRAMEF5 | 13424198 | 0.0996  | 0.3361  | -0.9494 |
| YRI | PRAMEF5 | 13429198 | 0.0905  | 0.3361  | -0.986  |
| YRI | PRAMEF5 | 13434198 | 0.0453  | 0.1681  | -0.73   |
| YRI | PRAMEF5 | 13439198 | 0       | 0       | 0       |
| YRI | PRAMEF5 | 13444198 | 2.6596  | 1.3445  | 2.136   |
| YRI | PRAMEF5 | 13449198 | 2.6596  | 1.3445  | 2.136   |
| YRI | PRAMEF5 | 13454198 | 0.7522  | 0.6722  | 0.2094  |
| YRI | PRAMEF5 | 13459198 | 0.7522  | 0.6722  | 0.2094  |
| YRI | PRAMEF5 | 13464198 | 1.7736  | 1.8487  | -0.0961 |
| YRI | PRAMEF5 | 13469198 | 1.7736  | 1.8487  | -0.0961 |
| YRI | PRAMEF5 | 13474198 | 0.4095  | 1.6806  | -1.7487 |
| YRI | PRAMEF5 | 13479198 | 3.4819  | 5.5461  | -1.0571 |
| YRI | PRAMEF5 | 13484198 | 6.396   | 7.8989  | -0.5591 |
| YRI | PRAMEF5 | 13489198 | 3.688   | 4.5377  | -0.5192 |
| YRI | PRAMEF5 | 13494198 | 1.1096  | 3.0251  | -1.6524 |
| YRI | PRAMEF5 | 13499198 | 0.9418  | 3.1932  | -1.8568 |
| YRI | PRAMEF5 | 13504198 | 0.3154  | 1.3445  | -1.6714 |
| YRI | PRAMEF5 | 13509198 | 0.8045  | 1.6806  | -1.2053 |
| YRI | PRAMEF5 | 13514198 | 2.667   | 4.7057  | -1.2068 |
| YRI | PRAMEF5 | 13519198 | 2.2634  | 4.3696  | -1.3299 |
| YRI | PRAMEF5 | 13524198 | 0.2821  | 0.6722  | -1.0213 |



## 2\_TajimasD\_data

|     |         |          |         |         |         |
|-----|---------|----------|---------|---------|---------|
| YRI | PRAMEF5 | 13529198 | 0       | 0       | 0       |
| YRI | PRAMEF5 | 13534198 | 2.5774  | 1.5126  | 1.5855  |
| YRI | PRAMEF5 | 13539198 | 3.0809  | 1.6806  | 1.9264  |
| YRI | PRAMEF5 | 13544198 | 0.5035  | 0.1681  | 1.9939  |
| YRI | PRAMEF5 | 13549198 | 1.2133  | 1.3445  | -0.2131 |
| YRI | PRAMEF5 | 13554198 | 1.3837  | 1.8487  | -0.5948 |
| YRI | PRAMEF5 | 13559198 | 0.1704  | 0.5042  | -1.049  |
| YRI | PRAMEF5 | 13564198 | 0       | 0       | 0       |
| YRI | PRAMEF5 | 13569198 | 0       | 0       | 0       |
| YRI | PRAMEF5 | 13574198 | 0       | 0       | 0       |
| YRI | PRAMEF5 | 13579198 | 0       | 0       | 0       |
| YRI | PRAMEF5 | 13584198 | 0       | 0       | 0       |
| YRI | PRAMEF5 | 13589198 | 0       | 0       | 0       |
| YRI | PRAMEF5 | 13594198 | 0       | 0       | 0       |
| YRI | PRAMEF5 | 13599198 | 0       | 0       | 0       |
| YRI | PRAMEF5 | 13604198 | 0       | 0       | 0       |
| YRI | PRAMEF5 | 13609198 | 0       | 0       | 0       |
| YRI | PRAMEF5 | 13614198 | 0       | 0       | 0       |
| YRI | PRAMEF5 | 13619198 | 0       | 0       | 0       |
| YRI | PRAMEF5 | 13624198 | 0       | 0       | 0       |
| YRI | PRAMEF5 | 13629198 | 0       | 0       | 0       |
| YRI | PRAMEF5 | 13634198 | 1.1751  | 2.1848  | -1.1337 |
| YRI | PRAMEF5 | 13639198 | 1.3451  | 2.8571  | -1.3674 |
| YRI | PRAMEF5 | 13644198 | 0.3345  | 1.1764  | -1.5058 |
| YRI | PRAMEF5 | 13649198 | 0.1645  | 0.5042  | -1.0676 |
| YRI | PRAMEF5 | 13654198 | 0.0276  | 0.1681  | -0.8352 |
| YRI | PRAMEF5 | 13659198 | 0.0276  | 0.1681  | -0.8352 |
| YRI | PRAMEF5 | 13664198 | 0.2092  | 1.3445  | -1.8439 |
| YRI | PRAMEF5 | 13669198 | 1.6047  | 2.3529  | -0.792  |
| YRI | PRAMEF5 | 13674198 | 1.4964  | 1.8487  | -0.4506 |
| YRI | PRAMEF5 | 13679198 | 0.1008  | 0.8403  | -1.6703 |
| YRI | PRAMEF5 | 13684198 | 1.1727  | 0.8403  | 0.7508  |
| YRI | PRAMEF5 | 13689198 | 1.1727  | 0.8403  | 0.7508  |
| YRI | PRAMEF5 | 13694198 | 0.3701  | 2.1848  | -2.0375 |
| YRI | PRAMEF5 | 13699198 | 2.6762  | 5.5461  | -1.4697 |
| YRI | PRAMEF5 | 13704198 | 2.946   | 4.2016  | -0.8202 |
| YRI | PRAMEF5 | 13709198 | 2.0771  | 3.0251  | -0.8178 |
| YRI | PRAMEF5 | 13714198 | 3.569   | 5.7141  | -1.0697 |
| YRI | PRAMEF5 | 13719198 | 3.5917  | 5.5461  | -1.0008 |
| YRI | PRAMEF5 | 13724198 | 1.5693  | 2.5209  | -0.953  |
| YRI | PRAMEF5 | 13729198 | 1.5987  | 1.3445  | 0.4129  |
| YRI | PRAMEF5 | 13734198 | 3.2444  | 3.0251  | 0.1892  |
| YRI | PRAMEF5 | 13739198 | 2.8924  | 3.3612  | -0.3704 |
| YRI | PRAMEF5 | 13744198 | 1.165   | 1.3445  | -0.2915 |
| YRI | PRAMEF5 | 13749198 | 0.0276  | 0.1681  | -0.8352 |
| YRI | PRAMEF5 | 13754198 | 0       | 0       | 0       |
| CEU | PRAMEF8 | 12786223 | 13.5298 | 11.7688 | 0.4551  |
| CEU | PRAMEF8 | 12791223 | 10.2587 | 9.0398  | 0.403   |
| CEU | PRAMEF8 | 12796223 | 10.502  | 9.2104  | 0.4197  |

## 2\_TajimasD\_data

|     |         |          |         |         |         |
|-----|---------|----------|---------|---------|---------|
| CEU | PRAMEF8 | 12801223 | 15.9798 | 11.0866 | 1.3375  |
| CEU | PRAMEF8 | 12806223 | 10.0171 | 8.6987  | 0.4517  |
| CEU | PRAMEF8 | 12811223 | 3.8244  | 7.8459  | -1.515  |
| CEU | PRAMEF8 | 12816223 | 8.4465  | 9.3809  | -0.2985 |
| CEU | PRAMEF8 | 12821223 | 12.7267 | 10.7454 | 0.5577  |
| CEU | PRAMEF8 | 12826223 | 11.0618 | 9.7221  | 0.414   |
| CEU | PRAMEF8 | 12831223 | 8.565   | 9.0398  | -0.157  |
| CEU | PRAMEF8 | 12836223 | 6.3395  | 10.7454 | -1.2401 |
| CEU | PRAMEF8 | 12841223 | 5.8899  | 9.0398  | -1.0414 |
| CEU | PRAMEF8 | 12846223 | 8.9794  | 10.7454 | -0.4971 |
| CEU | PRAMEF8 | 12851223 | 16.8073 | 17.2268 | -0.0755 |
| CEU | PRAMEF8 | 12856223 | 21.0907 | 19.7852 | 0.2057  |
| CEU | PRAMEF8 | 12861223 | 20.3438 | 26.4372 | -0.7251 |
| CEU | PRAMEF8 | 12866223 | 29.5318 | 57.4795 | -1.5534 |
| CEU | PRAMEF8 | 12871223 | 26.6815 | 50.8276 | -1.5151 |
| CEU | PRAMEF8 | 12876223 | 16.544  | 16.7151 | -0.0317 |
| CEU | PRAMEF8 | 12881223 | 16.8204 | 12.6216 | 1.0158  |
| CEU | PRAMEF8 | 12886223 | 21.0916 | 15.8623 | 1.0183  |
| CEU | PRAMEF8 | 12891223 | 21.7843 | 16.7151 | 0.9389  |
| CEU | PRAMEF8 | 12896223 | 23.3548 | 25.4138 | -0.2546 |
| CEU | PRAMEF8 | 12901223 | 16.7864 | 22.8554 | -0.8317 |
| CEU | PRAMEF8 | 12906223 | 8.1771  | 14.1567 | -1.2976 |
| CEU | PRAMEF8 | 12911223 | 12.5561 | 20.1264 | -1.1731 |
| CEU | PRAMEF8 | 12916223 | 19.9242 | 26.6077 | -0.7904 |
| CEU | PRAMEF8 | 12921223 | 19.2975 | 24.9021 | -0.7068 |
| CEU | PRAMEF8 | 12926223 | 8.726   | 12.4511 | -0.9129 |
| CEU | PRAMEF8 | 12931223 | 6.516   | 7.5047  | -0.3879 |
| CEU | PRAMEF8 | 12936223 | 9.3837  | 10.4043 | -0.2961 |
| CEU | PRAMEF8 | 12941223 | 14.8498 | 16.8857 | -0.3734 |
| CEU | PRAMEF8 | 12946223 | 13.9641 | 15.0095 | -0.2146 |
| CEU | PRAMEF8 | 12951223 | 7.0724  | 11.4277 | -1.1571 |
| CEU | PRAMEF8 | 12956223 | 3.893   | 7.6753  | -1.4538 |
| CEU | PRAMEF8 | 12961223 | 2.6638  | 2.5584  | 0.105   |
| CEU | PRAMEF8 | 12966223 | 1.611   | 1.8762  | -0.3376 |
| CEU | PRAMEF8 | 12971223 | 0.4578  | 0.6822  | -0.586  |
| CEU | PRAMEF8 | 12976223 | 0.516   | 0.8528  | -0.7585 |
| CEU | PRAMEF8 | 12981223 | 2.3861  | 5.1169  | -1.5115 |
| CEU | PRAMEF8 | 12986223 | 3.8543  | 6.9931  | -1.3133 |
| CEU | PRAMEF8 | 12991223 | 3.3195  | 5.458   | -1.118  |
| CEU | PRAMEF8 | 12996223 | 2.5904  | 5.1169  | -1.3985 |
| CEU | PRAMEF8 | 13001223 | 2.5073  | 4.0935  | -1.0666 |
| CEU | PRAMEF8 | 13006223 | 2.4894  | 3.5818  | -0.8233 |
| CEU | PRAMEF8 | 13011223 | 4.5846  | 5.2874  | -0.3779 |
| CEU | PRAMEF8 | 13016223 | 3.7485  | 5.2874  | -0.8275 |
| CEU | PRAMEF8 | 13021223 | 0.61    | 2.5584  | -1.9409 |
| CEU | PRAMEF8 | 13026223 | 0.2292  | 1.0234  | -1.5781 |
| CEU | PRAMEF8 | 13031223 | 0.0101  | 0.1706  | -0.9534 |
| CEU | PRAMEF8 | 13036223 | 3.7852  | 2.3879  | 1.4715  |
| CEU | PRAMEF8 | 13041223 | 3.7852  | 2.3879  | 1.4715  |

## 2\_TajimasD\_data

|     |         |          |         |         |         |
|-----|---------|----------|---------|---------|---------|
| CEU | PRAMEF8 | 13046223 | 3.7652  | 5.458   | -0.885  |
| CEU | PRAMEF8 | 13051223 | 5.8868  | 8.187   | -0.8333 |
| CEU | PRAMEF8 | 13056223 | 2.1216  | 2.729   | -0.5741 |
| CEU | PRAMEF8 | 13061223 | 0       | 0       | 0       |
| CEU | PRAMEF8 | 13066223 | 0       | 0       | 0       |
| CEU | PRAMEF8 | 13071223 | 0       | 0       | 0       |
| CEU | PRAMEF8 | 13076223 | 0       | 0       | 0       |
| CEU | PRAMEF8 | 13081223 | 0       | 0       | 0       |
| CEU | PRAMEF8 | 13086223 | 0       | 0       | 0       |
| CEU | PRAMEF8 | 13091223 | 0       | 0       | 0       |
| CEU | PRAMEF8 | 13096223 | 0       | 0       | 0       |
| CEU | PRAMEF8 | 13101223 | 0       | 0       | 0       |
| CEU | PRAMEF8 | 13106223 | 0.5543  | 0.6822  | -0.334  |
| CEU | PRAMEF8 | 13111223 | 1.242   | 1.1939  | 0.0857  |
| CEU | PRAMEF8 | 13116223 | 1.3325  | 2.2173  | -0.9885 |
| CEU | PRAMEF8 | 13121223 | 6.2997  | 9.3809  | -0.9843 |
| CEU | PRAMEF8 | 13126223 | 13.6778 | 17.3974 | -0.663  |
| CEU | PRAMEF8 | 13131223 | 12.3069 | 12.2805 | 0.0066  |
| CEU | PRAMEF8 | 13136223 | 7.048   | 4.2641  | 1.8071  |
| CEU | PRAMEF8 | 13141223 | 5.4993  | 4.6052  | 0.5428  |
| CEU | PRAMEF8 | 13146223 | 3.6753  | 5.1169  | -0.798  |
| CEU | PRAMEF8 | 13151223 | 1.1449  | 2.8996  | -1.5781 |
| CEU | PRAMEF8 | 13156223 | 1.4966  | 2.729   | -1.1649 |
| CEU | PRAMEF8 | 13161223 | 1.9876  | 2.729   | -0.7008 |
| CEU | PRAMEF8 | 13166223 | 1.2721  | 1.3645  | -0.1495 |
| CEU | PRAMEF8 | 13171223 | 6.6863  | 7.6753  | -0.3801 |
| CEU | PRAMEF8 | 13176223 | 13.4785 | 17.5679 | -0.7222 |
| CEU | PRAMEF8 | 13181223 | 15.0505 | 18.9324 | -0.638  |
| CEU | PRAMEF8 | 13186223 | 15.1631 | 14.3272 | 0.1793  |
| CEU | PRAMEF8 | 13191223 | 8.1051  | 6.8225  | 0.5488  |
| CEU | PRAMEF8 | 13196223 | 0.9194  | 2.3879  | -1.5465 |
| CEU | PRAMEF8 | 13201223 | 2.1886  | 3.2407  | -0.8627 |
| CEU | PRAMEF8 | 13206223 | 2.1008  | 1.8762  | 0.286   |
| CEU | PRAMEF8 | 13211223 | 1.3088  | 2.0467  | -0.878  |
| CEU | PRAMEF8 | 13216223 | 1.6945  | 2.8996  | -1.0838 |
| CEU | PRAMEF8 | 13221223 | 0.5931  | 1.0234  | -0.855  |
| CEU | PRAMEF8 | 13226223 | 0       | 0       | 0       |
| CEU | PRAMEF8 | 13231223 | 0       | 0       | 0       |
| CEU | PRAMEF8 | 13236223 | 0       | 0       | 0       |
| CEU | PRAMEF8 | 13241223 | 0       | 0       | 0       |
| CEU | PRAMEF8 | 13246223 | 0       | 0       | 0       |
| CEU | PRAMEF8 | 13251223 | 0       | 0       | 0       |
| CEU | PRAMEF8 | 13256223 | 0       | 0       | 0       |
| CEU | PRAMEF8 | 13261223 | 0       | 0       | 0       |
| CEU | PRAMEF8 | 13266223 | 0       | 0       | 0       |
| CEU | PRAMEF8 | 13271223 | 0       | 0       | 0       |
| CEU | PRAMEF8 | 13276223 | 0       | 0       | 0       |
| CEU | PRAMEF8 | 13281223 | 0       | 0       | 0       |
| CEU | PRAMEF8 | 13286223 | 0       | 0       | 0       |

## 2\_TajimasD\_data

|     |         |          |         |         |         |
|-----|---------|----------|---------|---------|---------|
| CEU | PRAMEF8 | 13291223 | 0       | 0       | 0       |
| CEU | PRAMEF8 | 13296223 | 0       | 0       | 0       |
| CEU | PRAMEF8 | 13301223 | 0       | 0       | 0       |
| CEU | PRAMEF8 | 13306223 | 0       | 0       | 0       |
| CEU | PRAMEF8 | 13311223 | 0       | 0       | 0       |
| CEU | PRAMEF8 | 13316223 | 0       | 0       | 0       |
| CEU | PRAMEF8 | 13321223 | 0       | 0       | 0       |
| CEU | PRAMEF8 | 13326223 | 0.6654  | 2.0467  | -1.6436 |
| CEU | PRAMEF8 | 13331223 | 0.6654  | 2.5584  | -1.8857 |
| CEU | PRAMEF8 | 13336223 | 0.0101  | 0.6822  | -1.7551 |
| CEU | PRAMEF8 | 13341223 | 0.6386  | 0.6822  | -0.1139 |
| CEU | PRAMEF8 | 13346223 | 1.1989  | 1.7056  | -0.694  |
| CEU | PRAMEF8 | 13351223 | 4.0313  | 7.3342  | -1.3234 |
| CEU | PRAMEF8 | 13356223 | 3.7149  | 6.8225  | -1.3297 |
| CEU | PRAMEF8 | 13361223 | 1.5327  | 1.5351  | -0.0036 |
| CEU | PRAMEF8 | 13366223 | 1.5366  | 1.0234  | 1.0198  |
| CEU | PRAMEF8 | 13371223 | 1.6974  | 0.8528  | 1.902   |
| CEU | PRAMEF8 | 13376223 | 8.1975  | 4.6052  | 2.181   |
| CEU | PRAMEF8 | 13381223 | 15.5149 | 10.4043 | 1.4826  |
| CEU | PRAMEF8 | 13386223 | 8.757   | 6.4814  | 1.02    |
| CEU | PRAMEF8 | 13391223 | 0       | 0       | 0       |
| CEU | PRAMEF8 | 13396223 | 0       | 0       | 0       |
| CEU | PRAMEF8 | 13401223 | 0       | 0       | 0       |
| CEU | PRAMEF8 | 13406223 | 0       | 0       | 0       |
| CEU | PRAMEF8 | 13411223 | 2.965   | 1.8762  | 1.3862  |
| CEU | PRAMEF8 | 13416223 | 2.965   | 1.8762  | 1.3862  |
| CEU | PRAMEF8 | 13421223 | 0.4877  | 0.3411  | 0.5877  |
| CEU | PRAMEF8 | 13426223 | 0.5659  | 0.5117  | 0.17    |
| CEU | PRAMEF8 | 13431223 | 0.0781  | 0.1706  | -0.5495 |
| CEU | PRAMEF8 | 13436223 | 0       | 0       | 0       |
| CEU | PRAMEF8 | 13441223 | 0       | 0       | 0       |
| CEU | PRAMEF8 | 13446223 | 1.3636  | 1.1939  | 0.3024  |
| CEU | PRAMEF8 | 13451223 | 1.9771  | 1.8762  | 0.1285  |
| CEU | PRAMEF8 | 13456223 | 0.6135  | 0.6822  | -0.1794 |
| CEU | PRAMEF8 | 13461223 | 0.9872  | 0.3411  | 2.59    |
| CEU | PRAMEF8 | 13466223 | 1.9272  | 1.5351  | 0.5814  |
| CEU | PRAMEF8 | 13471223 | 1.4659  | 2.5584  | -1.0883 |
| CEU | PRAMEF8 | 13476223 | 3.569   | 3.0701  | 0.4279  |
| CEU | PRAMEF8 | 13481223 | 5.5236  | 4.4346  | 0.6833  |
| CEU | PRAMEF8 | 13486223 | 5.455   | 5.6286  | -0.0883 |
| CEU | PRAMEF8 | 13491223 | 3.2047  | 3.0701  | 0.1155  |
| CEU | PRAMEF8 | 13496223 | 2.4199  | 2.3879  | 0.0337  |
| CEU | PRAMEF8 | 13501223 | 2.8409  | 2.8996  | -0.0528 |
| CEU | PRAMEF8 | 13506223 | 0.9093  | 1.1939  | -0.5072 |
| CEU | PRAMEF8 | 13511223 | 2.2676  | 1.5351  | 1.0862  |
| CEU | PRAMEF8 | 13516223 | 2.8637  | 3.7524  | -0.6438 |
| CEU | PRAMEF8 | 13521223 | 0.8644  | 2.8996  | -1.8303 |
| CEU | PRAMEF8 | 13526223 | 0.0101  | 0.1706  | -0.9534 |
| CEU | PRAMEF8 | 13531223 | 1.0872  | 0.8528  | 0.5279  |

## 2\_TajimasD\_data

|     |         |          |        |        |         |
|-----|---------|----------|--------|--------|---------|
| CEU | PRAMEF8 | 13536223 | 1.6549 | 1.3645 | 0.4698  |
| CEU | PRAMEF8 | 13541223 | 0.8681 | 0.6822 | 0.4854  |
| CEU | PRAMEF8 | 13546223 | 0.851  | 0.5117 | 1.0641  |
| CEU | PRAMEF8 | 13551223 | 1.517  | 1.0234 | 0.9808  |
| CEU | PRAMEF8 | 13556223 | 0.9664 | 0.6822 | 0.7421  |
| CEU | PRAMEF8 | 13561223 | 0      | 0      | 0       |
| CEU | PRAMEF8 | 13566223 | 0      | 0      | 0       |
| CEU | PRAMEF8 | 13571223 | 0      | 0      | 0       |
| CEU | PRAMEF8 | 13576223 | 0      | 0      | 0       |
| CEU | PRAMEF8 | 13581223 | 0      | 0      | 0       |
| CEU | PRAMEF8 | 13586223 | 0      | 0      | 0       |
| CEU | PRAMEF8 | 13591223 | 0      | 0      | 0       |
| CEU | PRAMEF8 | 13596223 | 0      | 0      | 0       |
| CEU | PRAMEF8 | 13601223 | 0      | 0      | 0       |
| CEU | PRAMEF8 | 13606223 | 0      | 0      | 0       |
| CEU | PRAMEF8 | 13611223 | 0      | 0      | 0       |
| CEU | PRAMEF8 | 13616223 | 0      | 0      | 0       |
| CEU | PRAMEF8 | 13621223 | 0      | 0      | 0       |
| CEU | PRAMEF8 | 13626223 | 0      | 0      | 0       |
| CEU | PRAMEF8 | 13631223 | 1.4345 | 3.0701 | -1.403  |
| CEU | PRAMEF8 | 13636223 | 1.6079 | 3.4112 | -1.4163 |
| CEU | PRAMEF8 | 13641223 | 0.1934 | 0.5117 | -0.9983 |
| CEU | PRAMEF8 | 13646223 | 0.02   | 0.1706 | -0.8946 |
| CEU | PRAMEF8 | 13651223 | 0.0101 | 0.1706 | -0.9534 |
| CEU | PRAMEF8 | 13656223 | 0.0202 | 0.3411 | -1.2864 |
| CEU | PRAMEF8 | 13661223 | 0.0101 | 0.1706 | -0.9534 |
| CEU | PRAMEF8 | 13666223 | 1.5242 | 0.6822 | 2.1987  |
| CEU | PRAMEF8 | 13671223 | 1.6236 | 1.0234 | 1.1926  |
| CEU | PRAMEF8 | 13676223 | 0.0994 | 0.3411 | -0.9689 |
| CEU | PRAMEF8 | 13681223 | 0      | 0      | 0       |
| CEU | PRAMEF8 | 13686223 | 0.1769 | 0.6822 | -1.3195 |
| CEU | PRAMEF8 | 13691223 | 1.0369 | 2.8996 | -1.6752 |
| CEU | PRAMEF8 | 13696223 | 0.86   | 2.2173 | -1.5164 |
| CEU | PRAMEF8 | 13701223 | 2.0686 | 2.5584 | -0.4879 |
| CEU | PRAMEF8 | 13706223 | 3.7291 | 4.6052 | -0.5319 |
| CEU | PRAMEF8 | 13711223 | 2.142  | 2.2173 | -0.0841 |
| CEU | PRAMEF8 | 13716223 | 2.2375 | 3.4112 | -0.9218 |
| CEU | PRAMEF8 | 13721223 | 3.0901 | 4.6052 | -0.9199 |
| CEU | PRAMEF8 | 13726223 | 1.3342 | 1.3645 | -0.049  |
| CEU | PRAMEF8 | 13731223 | 2.1336 | 1.3645 | 1.2442  |
| CEU | PRAMEF8 | 13736223 | 2.6125 | 1.8762 | 0.9374  |
| CEU | PRAMEF8 | 13741223 | 1.2566 | 1.1939 | 0.1117  |
| CEU | PRAMEF8 | 13746223 | 0.7778 | 0.6822 | 0.2496  |
| CEU | PRAMEF8 | 13751223 | 0      | 0      | 0       |
| CEU | PRAMEF8 | 13756223 | 0      | 0      | 0       |
| CEU | PRAMEF8 | 13761223 | 0      | 0      | 0       |
| CEU | PRAMEF8 | 13766223 | 0.4354 | 0.6822 | -0.6445 |
| CEU | PRAMEF8 | 13771223 | 1.8813 | 3.7524 | -1.3556 |
| CEU | PRAMEF8 | 13776223 | 3.3585 | 4.4346 | -0.6752 |

## 2\_TajimasD\_data

|     |         |          |         |         |         |
|-----|---------|----------|---------|---------|---------|
| CHB | PRAMEF8 | 12786223 | 12.8077 | 13.3838 | -0.1315 |
| CHB | PRAMEF8 | 12791223 | 9.5629  | 10.6731 | -0.3136 |
| CHB | PRAMEF8 | 12796223 | 9.2368  | 11.3508 | -0.5636 |
| CHB | PRAMEF8 | 12801223 | 14.387  | 13.7226 | 0.1481  |
| CHB | PRAMEF8 | 12806223 | 8.9366  | 10.8426 | -0.5304 |
| CHB | PRAMEF8 | 12811223 | 3.1985  | 8.8096  | -1.8945 |
| CHB | PRAMEF8 | 12816223 | 7.7795  | 11.012  | -0.8866 |
| CHB | PRAMEF8 | 12821223 | 12.1051 | 12.0285 | 0.0193  |
| CHB | PRAMEF8 | 12826223 | 11.2138 | 11.8591 | -0.1651 |
| CHB | PRAMEF8 | 12831223 | 9.2442  | 12.7061 | -0.8299 |
| CHB | PRAMEF8 | 12836223 | 6.6392  | 13.892  | -1.5978 |
| CHB | PRAMEF8 | 12841223 | 6.0304  | 12.1979 | -1.5366 |
| CHB | PRAMEF8 | 12846223 | 9.5469  | 11.1814 | -0.442  |
| CHB | PRAMEF8 | 12851223 | 17.8308 | 18.2968 | -0.0789 |
| CHB | PRAMEF8 | 12856223 | 21.7952 | 21.0075 | 0.1168  |
| CHB | PRAMEF8 | 12861223 | 18.7219 | 26.2593 | -0.9003 |
| CHB | PRAMEF8 | 12866223 | 24.656  | 57.2623 | -1.814  |
| CHB | PRAMEF8 | 12871223 | 21.6674 | 49.9774 | -1.801  |
| CHB | PRAMEF8 | 12876223 | 12.3864 | 17.958  | -0.9606 |
| CHB | PRAMEF8 | 12881223 | 12.6585 | 15.0779 | -0.493  |
| CHB | PRAMEF8 | 12886223 | 16.316  | 17.7886 | -0.2562 |
| CHB | PRAMEF8 | 12891223 | 17.5073 | 18.6357 | -0.1878 |
| CHB | PRAMEF8 | 12896223 | 33.2848 | 26.7676 | 0.7641  |
| CHB | PRAMEF8 | 12901223 | 31.2154 | 24.0569 | 0.9309  |
| CHB | PRAMEF8 | 12906223 | 20.6696 | 16.7721 | 0.7175  |
| CHB | PRAMEF8 | 12911223 | 33.1324 | 22.5322 | 1.4687  |
| CHB | PRAMEF8 | 12916223 | 34.511  | 27.7841 | 0.7606  |
| CHB | PRAMEF8 | 12921223 | 23.9941 | 23.3793 | 0.0822  |
| CHB | PRAMEF8 | 12926223 | 10.9111 | 10.8426 | 0.0191  |
| CHB | PRAMEF8 | 12931223 | 7.2176  | 7.1154  | 0.042   |
| CHB | PRAMEF8 | 12936223 | 8.8673  | 10.5037 | -0.4692 |
| CHB | PRAMEF8 | 12941223 | 13.1928 | 19.991  | -1.0573 |
| CHB | PRAMEF8 | 12946223 | 10.8201 | 17.958  | -1.2307 |
| CHB | PRAMEF8 | 12951223 | 4.9537  | 12.7061 | -1.8584 |
| CHB | PRAMEF8 | 12956223 | 3.8713  | 9.1484  | -1.7205 |
| CHB | PRAMEF8 | 12961223 | 2.8884  | 3.0495  | -0.1385 |
| CHB | PRAMEF8 | 12966223 | 1.2271  | 2.7106  | -1.4057 |
| CHB | PRAMEF8 | 12971223 | 0.1645  | 2.2024  | -2.2819 |
| CHB | PRAMEF8 | 12976223 | 0.3052  | 2.2024  | -2.1244 |
| CHB | PRAMEF8 | 12981223 | 2.4993  | 5.5907  | -1.5773 |
| CHB | PRAMEF8 | 12986223 | 3.8287  | 5.7601  | -0.9596 |
| CHB | PRAMEF8 | 12991223 | 2.786   | 4.2354  | -0.9436 |
| CHB | PRAMEF8 | 12996223 | 1.7299  | 4.066   | -1.5753 |
| CHB | PRAMEF8 | 13001223 | 1.6796  | 3.8965  | -1.5505 |
| CHB | PRAMEF8 | 13006223 | 2.0495  | 3.2189  | -0.9614 |
| CHB | PRAMEF8 | 13011223 | 3.2102  | 4.2354  | -0.6674 |
| CHB | PRAMEF8 | 13016223 | 2.4245  | 3.7271  | -0.9463 |
| CHB | PRAMEF8 | 13021223 | 0.2654  | 1.1859  | -1.6431 |
| CHB | PRAMEF8 | 13026223 | 0.1319  | 0.6777  | -1.4269 |

## 2\_TajimasD\_data

|     |         |          |         |         |         |
|-----|---------|----------|---------|---------|---------|
| CHB | PRAMEF8 | 13031223 | 0       | 0       | 0       |
| CHB | PRAMEF8 | 13036223 | 4.1017  | 2.7106  | 1.3181  |
| CHB | PRAMEF8 | 13041223 | 4.1017  | 2.7106  | 1.3181  |
| CHB | PRAMEF8 | 13046223 | 8.3257  | 6.6072  | 0.7548  |
| CHB | PRAMEF8 | 13051223 | 12.6674 | 10.3343 | 0.6791  |
| CHB | PRAMEF8 | 13056223 | 4.3417  | 3.7271  | 0.4465  |
| CHB | PRAMEF8 | 13061223 | 0       | 0       | 0       |
| CHB | PRAMEF8 | 13066223 | 0       | 0       | 0       |
| CHB | PRAMEF8 | 13071223 | 0       | 0       | 0       |
| CHB | PRAMEF8 | 13076223 | 0       | 0       | 0       |
| CHB | PRAMEF8 | 13081223 | 0       | 0       | 0       |
| CHB | PRAMEF8 | 13086223 | 0       | 0       | 0       |
| CHB | PRAMEF8 | 13091223 | 0       | 0       | 0       |
| CHB | PRAMEF8 | 13096223 | 0       | 0       | 0       |
| CHB | PRAMEF8 | 13101223 | 0       | 0       | 0       |
| CHB | PRAMEF8 | 13106223 | 0.4826  | 0.3388  | 0.5768  |
| CHB | PRAMEF8 | 13111223 | 1.2136  | 0.6777  | 1.401   |
| CHB | PRAMEF8 | 13116223 | 1.6575  | 0.8471  | 1.8274  |
| CHB | PRAMEF8 | 13121223 | 5.5816  | 7.6237  | -0.7875 |
| CHB | PRAMEF8 | 13126223 | 9.9279  | 16.0944 | -1.1808 |
| CHB | PRAMEF8 | 13131223 | 9.1485  | 12.3673 | -0.7916 |
| CHB | PRAMEF8 | 13136223 | 6.2846  | 5.2519  | 0.557   |
| CHB | PRAMEF8 | 13141223 | 6.0889  | 4.4048  | 1.0597  |
| CHB | PRAMEF8 | 13146223 | 7.5243  | 5.5907  | 0.9866  |
| CHB | PRAMEF8 | 13151223 | 4.5421  | 3.3883  | 0.9086  |
| CHB | PRAMEF8 | 13156223 | 1.8442  | 1.8636  | -0.0248 |
| CHB | PRAMEF8 | 13161223 | 1.8311  | 2.8801  | -0.9458 |
| CHB | PRAMEF8 | 13166223 | 1.0992  | 1.8636  | -0.9753 |
| CHB | PRAMEF8 | 13171223 | 8.4891  | 8.3013  | 0.067   |
| CHB | PRAMEF8 | 13176223 | 25.1123 | 19.991  | 0.7965  |
| CHB | PRAMEF8 | 13181223 | 28.7447 | 22.3628 | 0.8907  |
| CHB | PRAMEF8 | 13186223 | 19.9954 | 16.4333 | 0.6687  |
| CHB | PRAMEF8 | 13191223 | 8.8182  | 7.2848  | 0.6164  |
| CHB | PRAMEF8 | 13196223 | 1.5797  | 3.0495  | -1.264  |
| CHB | PRAMEF8 | 13201223 | 2.6391  | 4.4048  | -1.1111 |
| CHB | PRAMEF8 | 13206223 | 1.656   | 2.8801  | -1.1037 |
| CHB | PRAMEF8 | 13211223 | 1.7323  | 2.2024  | -0.5264 |
| CHB | PRAMEF8 | 13216223 | 2.6886  | 3.7271  | -0.7544 |
| CHB | PRAMEF8 | 13221223 | 1.023   | 2.033   | -1.2044 |
| CHB | PRAMEF8 | 13226223 | 0       | 0       | 0       |
| CHB | PRAMEF8 | 13231223 | 0       | 0       | 0       |
| CHB | PRAMEF8 | 13236223 | 0       | 0       | 0       |
| CHB | PRAMEF8 | 13241223 | 0       | 0       | 0       |
| CHB | PRAMEF8 | 13246223 | 0       | 0       | 0       |
| CHB | PRAMEF8 | 13251223 | 0       | 0       | 0       |
| CHB | PRAMEF8 | 13256223 | 0       | 0       | 0       |
| CHB | PRAMEF8 | 13261223 | 0       | 0       | 0       |
| CHB | PRAMEF8 | 13266223 | 0       | 0       | 0       |
| CHB | PRAMEF8 | 13271223 | 0       | 0       | 0       |

## 2\_TajimasD\_data

|     |         |          |         |         |         |
|-----|---------|----------|---------|---------|---------|
| CHB | PRAMEF8 | 13276223 | 0       | 0       | 0       |
| CHB | PRAMEF8 | 13281223 | 0       | 0       | 0       |
| CHB | PRAMEF8 | 13286223 | 0       | 0       | 0       |
| CHB | PRAMEF8 | 13291223 | 0       | 0       | 0       |
| CHB | PRAMEF8 | 13296223 | 0       | 0       | 0       |
| CHB | PRAMEF8 | 13301223 | 0       | 0       | 0       |
| CHB | PRAMEF8 | 13306223 | 0       | 0       | 0       |
| CHB | PRAMEF8 | 13311223 | 0       | 0       | 0       |
| CHB | PRAMEF8 | 13316223 | 0       | 0       | 0       |
| CHB | PRAMEF8 | 13321223 | 0       | 0       | 0       |
| CHB | PRAMEF8 | 13326223 | 2.462   | 2.2024  | 0.2907  |
| CHB | PRAMEF8 | 13331223 | 2.4717  | 2.8801  | -0.3682 |
| CHB | PRAMEF8 | 13336223 | 0.0097  | 0.6777  | -1.7463 |
| CHB | PRAMEF8 | 13341223 | 0.5962  | 0.3388  | 1.0325  |
| CHB | PRAMEF8 | 13346223 | 1.0364  | 2.033   | -1.1885 |
| CHB | PRAMEF8 | 13351223 | 3.1761  | 7.1154  | -1.6178 |
| CHB | PRAMEF8 | 13356223 | 2.7938  | 5.9295  | -1.518  |
| CHB | PRAMEF8 | 13361223 | 1.2431  | 1.1859  | 0.1021  |
| CHB | PRAMEF8 | 13366223 | 1.4748  | 0.8471  | 1.4155  |
| CHB | PRAMEF8 | 13371223 | 1.7396  | 1.0165  | 1.439   |
| CHB | PRAMEF8 | 13376223 | 6.8804  | 4.066   | 1.8978  |
| CHB | PRAMEF8 | 13381223 | 14.0065 | 10.1649 | 1.1356  |
| CHB | PRAMEF8 | 13386223 | 8.5761  | 6.946   | 0.6843  |
| CHB | PRAMEF8 | 13391223 | 0       | 0       | 0       |
| CHB | PRAMEF8 | 13396223 | 0       | 0       | 0       |
| CHB | PRAMEF8 | 13401223 | 0       | 0       | 0       |
| CHB | PRAMEF8 | 13406223 | 0       | 0       | 0       |
| CHB | PRAMEF8 | 13411223 | 3.276   | 2.5412  | 0.7338  |
| CHB | PRAMEF8 | 13416223 | 3.276   | 2.5412  | 0.7338  |
| CHB | PRAMEF8 | 13421223 | 0.8094  | 0.3388  | 1.8877  |
| CHB | PRAMEF8 | 13426223 | 1.2378  | 0.5082  | 2.2903  |
| CHB | PRAMEF8 | 13431223 | 0.4283  | 0.1694  | 1.5384  |
| CHB | PRAMEF8 | 13436223 | 0       | 0       | 0       |
| CHB | PRAMEF8 | 13441223 | 0       | 0       | 0       |
| CHB | PRAMEF8 | 13446223 | 1.0632  | 1.1859  | -0.219  |
| CHB | PRAMEF8 | 13451223 | 2.0701  | 1.8636  | 0.2635  |
| CHB | PRAMEF8 | 13456223 | 1.0069  | 0.6777  | 0.8606  |
| CHB | PRAMEF8 | 13461223 | 0.9562  | 0.3388  | 2.4766  |
| CHB | PRAMEF8 | 13466223 | 2.1256  | 1.5247  | 0.8927  |
| CHB | PRAMEF8 | 13471223 | 3.4752  | 2.5412  | 0.9327  |
| CHB | PRAMEF8 | 13476223 | 5.6227  | 2.8801  | 2.4728  |
| CHB | PRAMEF8 | 13481223 | 7.7952  | 4.7436  | 1.8001  |
| CHB | PRAMEF8 | 13486223 | 8.3621  | 5.9295  | 1.1777  |
| CHB | PRAMEF8 | 13491223 | 3.9499  | 3.0495  | 0.7743  |
| CHB | PRAMEF8 | 13496223 | 2.7946  | 2.3718  | 0.4463  |
| CHB | PRAMEF8 | 13501223 | 3.4026  | 2.5412  | 0.8602  |
| CHB | PRAMEF8 | 13506223 | 0.9212  | 0.8471  | 0.1671  |
| CHB | PRAMEF8 | 13511223 | 1.857   | 1.1859  | 1.1979  |
| CHB | PRAMEF8 | 13516223 | 2.2886  | 3.2189  | -0.7648 |



## 2\_TajimasD\_data

|     |         |          |        |        |         |
|-----|---------|----------|--------|--------|---------|
| CHB | PRAMEF8 | 13521223 | 0.6884 | 2.5412 | -1.8502 |
| CHB | PRAMEF8 | 13526223 | 0.0097 | 0.1694 | -0.949  |
| CHB | PRAMEF8 | 13531223 | 1.1392 | 0.6777 | 1.2065  |
| CHB | PRAMEF8 | 13536223 | 1.6981 | 1.1859 | 0.9143  |
| CHB | PRAMEF8 | 13541223 | 0.9351 | 0.8471 | 0.1984  |
| CHB | PRAMEF8 | 13546223 | 0.6057 | 0.6777 | -0.1882 |
| CHB | PRAMEF8 | 13551223 | 0.9235 | 1.5247 | -0.8932 |
| CHB | PRAMEF8 | 13556223 | 0.6939 | 1.1859 | -0.8782 |
| CHB | PRAMEF8 | 13561223 | 0      | 0      | 0       |
| CHB | PRAMEF8 | 13566223 | 0      | 0      | 0       |
| CHB | PRAMEF8 | 13571223 | 0      | 0      | 0       |
| CHB | PRAMEF8 | 13576223 | 0      | 0      | 0       |
| CHB | PRAMEF8 | 13581223 | 0      | 0      | 0       |
| CHB | PRAMEF8 | 13586223 | 0      | 0      | 0       |
| CHB | PRAMEF8 | 13591223 | 0      | 0      | 0       |
| CHB | PRAMEF8 | 13596223 | 0      | 0      | 0       |
| CHB | PRAMEF8 | 13601223 | 0      | 0      | 0       |
| CHB | PRAMEF8 | 13606223 | 0      | 0      | 0       |
| CHB | PRAMEF8 | 13611223 | 0      | 0      | 0       |
| CHB | PRAMEF8 | 13616223 | 0      | 0      | 0       |
| CHB | PRAMEF8 | 13621223 | 0      | 0      | 0       |
| CHB | PRAMEF8 | 13626223 | 0      | 0      | 0       |
| CHB | PRAMEF8 | 13631223 | 0.9098 | 2.5412 | -1.6291 |
| CHB | PRAMEF8 | 13636223 | 1.6926 | 2.8801 | -1.0707 |
| CHB | PRAMEF8 | 13641223 | 0.9018 | 0.5082 | 1.2356  |
| CHB | PRAMEF8 | 13646223 | 0.119  | 0.1694 | -0.2995 |
| CHB | PRAMEF8 | 13651223 | 0.0097 | 0.1694 | -0.949  |
| CHB | PRAMEF8 | 13656223 | 0.0097 | 0.1694 | -0.949  |
| CHB | PRAMEF8 | 13661223 | 0      | 0      | 0       |
| CHB | PRAMEF8 | 13666223 | 1.3333 | 1.1859 | 0.2631  |
| CHB | PRAMEF8 | 13671223 | 1.4099 | 1.5247 | -0.1706 |
| CHB | PRAMEF8 | 13676223 | 0.0765 | 0.3388 | -1.0522 |
| CHB | PRAMEF8 | 13681223 | 0      | 0      | 0       |
| CHB | PRAMEF8 | 13686223 | 0.189  | 0.6777 | -1.2776 |
| CHB | PRAMEF8 | 13691223 | 0.7036 | 2.8801 | -1.9624 |
| CHB | PRAMEF8 | 13696223 | 0.5146 | 2.2024 | -1.8899 |
| CHB | PRAMEF8 | 13701223 | 2.4536 | 2.7106 | -0.2435 |
| CHB | PRAMEF8 | 13706223 | 4.0272 | 3.8965 | 0.0914  |
| CHB | PRAMEF8 | 13711223 | 1.9964 | 2.2024 | -0.2307 |
| CHB | PRAMEF8 | 13716223 | 2.5243 | 4.2354 | -1.1139 |
| CHB | PRAMEF8 | 13721223 | 3.2256 | 4.913  | -0.9652 |
| CHB | PRAMEF8 | 13726223 | 1.1338 | 1.8636 | -0.9311 |
| CHB | PRAMEF8 | 13731223 | 1.819  | 1.5247 | 0.4372  |
| CHB | PRAMEF8 | 13736223 | 2.1601 | 1.8636 | 0.3783  |
| CHB | PRAMEF8 | 13741223 | 1.1112 | 1.5247 | -0.6143 |
| CHB | PRAMEF8 | 13746223 | 0.7603 | 1.0165 | -0.5099 |
| CHB | PRAMEF8 | 13751223 | 0      | 0      | 0       |
| CHB | PRAMEF8 | 13756223 | 0      | 0      | 0       |
| CHB | PRAMEF8 | 13761223 | 0      | 0      | 0       |

## 2\_TajimasD\_data

|     |         |          |         |         |         |
|-----|---------|----------|---------|---------|---------|
| CHB | PRAMEF8 | 13766223 | 0.5654  | 0.5082  | 0.1796  |
| CHB | PRAMEF8 | 13771223 | 3.949   | 2.7106  | 1.1735  |
| CHB | PRAMEF8 | 13776223 | 5.7327  | 3.5577  | 1.6438  |
| YRI | PRAMEF8 | 12786223 | 19.3859 | 17.8146 | 0.2721  |
| YRI | PRAMEF8 | 12791223 | 15.0696 | 15.7978 | -0.1415 |
| YRI | PRAMEF8 | 12796223 | 15.1308 | 14.7895 | 0.0706  |
| YRI | PRAMEF8 | 12801223 | 22.8131 | 17.9827 | 0.8289  |
| YRI | PRAMEF8 | 12806223 | 18.6134 | 16.9743 | 0.2973  |
| YRI | PRAMEF8 | 12811223 | 12.9473 | 14.2853 | -0.2861 |
| YRI | PRAMEF8 | 12816223 | 14.6852 | 15.1256 | -0.0892 |
| YRI | PRAMEF8 | 12821223 | 15.3339 | 16.4701 | -0.2121 |
| YRI | PRAMEF8 | 12826223 | 13.818  | 15.2937 | -0.2957 |
| YRI | PRAMEF8 | 12831223 | 11.8679 | 13.613  | -0.3906 |
| YRI | PRAMEF8 | 12836223 | 8.6442  | 12.2685 | -0.895  |
| YRI | PRAMEF8 | 12841223 | 8.0407  | 12.9408 | -1.1506 |
| YRI | PRAMEF8 | 12846223 | 11.8043 | 15.6298 | -0.7508 |
| YRI | PRAMEF8 | 12851223 | 16.9232 | 19.8313 | -0.4542 |
| YRI | PRAMEF8 | 12856223 | 18.4636 | 20.8397 | -0.3538 |
| YRI | PRAMEF8 | 12861223 | 15.9425 | 16.9743 | -0.1871 |
| YRI | PRAMEF8 | 12866223 | 12.3899 | 14.6214 | -0.4667 |
| YRI | PRAMEF8 | 12871223 | 12.9714 | 15.6298 | -0.5217 |
| YRI | PRAMEF8 | 12876223 | 17.2573 | 17.3104 | -0.0095 |
| YRI | PRAMEF8 | 12881223 | 20.1694 | 21.512  | -0.1939 |
| YRI | PRAMEF8 | 12886223 | 25.2588 | 29.5789 | -0.458  |
| YRI | PRAMEF8 | 12891223 | 24.7064 | 29.2428 | -0.4863 |
| YRI | PRAMEF8 | 12896223 | 25.2364 | 35.2931 | -0.8973 |
| YRI | PRAMEF8 | 12901223 | 19.5809 | 33.6124 | -1.3131 |
| YRI | PRAMEF8 | 12906223 | 13.3671 | 24.369  | -1.4082 |
| YRI | PRAMEF8 | 12911223 | 16.2988 | 27.2261 | -1.2559 |
| YRI | PRAMEF8 | 12916223 | 23.8914 | 30.7554 | -0.7006 |
| YRI | PRAMEF8 | 12921223 | 24.3611 | 26.3858 | -0.2399 |
| YRI | PRAMEF8 | 12926223 | 12.3307 | 15.1256 | -0.5659 |
| YRI | PRAMEF8 | 12931223 | 9.2693  | 13.445  | -0.9457 |
| YRI | PRAMEF8 | 12936223 | 12.2934 | 19.4952 | -1.1436 |
| YRI | PRAMEF8 | 12941223 | 21.4581 | 28.9067 | -0.8076 |
| YRI | PRAMEF8 | 12946223 | 20.8816 | 29.0748 | -0.8833 |
| YRI | PRAMEF8 | 12951223 | 9.6917  | 19.1591 | -1.5287 |
| YRI | PRAMEF8 | 12956223 | 5.6938  | 11.4282 | -1.5139 |
| YRI | PRAMEF8 | 12961223 | 3.4632  | 6.0502  | -1.2257 |
| YRI | PRAMEF8 | 12966223 | 2.2942  | 4.5377  | -1.3709 |
| YRI | PRAMEF8 | 12971223 | 1.731   | 3.6974  | -1.4333 |
| YRI | PRAMEF8 | 12976223 | 1.0967  | 2.1848  | -1.2217 |
| YRI | PRAMEF8 | 12981223 | 3.9602  | 6.2183  | -1.0439 |
| YRI | PRAMEF8 | 12986223 | 5.2177  | 8.235   | -1.0804 |
| YRI | PRAMEF8 | 12991223 | 6.1679  | 6.0502  | 0.0558  |
| YRI | PRAMEF8 | 12996223 | 6.5427  | 5.8822  | 0.3209  |
| YRI | PRAMEF8 | 13001223 | 4.4644  | 4.8738  | -0.235  |
| YRI | PRAMEF8 | 13006223 | 4.1211  | 4.0335  | 0.0593  |
| YRI | PRAMEF8 | 13011223 | 6.6443  | 6.5544  | 0.0396  |

## 2\_TajimasD\_data

|     |         |          |         |         |         |
|-----|---------|----------|---------|---------|---------|
| YRI | PRAMEF8 | 13016223 | 5.6171  | 4.8738  | 0.4267  |
| YRI | PRAMEF8 | 13021223 | 1.075   | 0.8403  | 0.5301  |
| YRI | PRAMEF8 | 13026223 | 0.3242  | 0.8403  | -1.1657 |
| YRI | PRAMEF8 | 13031223 | 0.1585  | 0.6722  | -1.3448 |
| YRI | PRAMEF8 | 13036223 | 3.0844  | 4.0335  | -0.6422 |
| YRI | PRAMEF8 | 13041223 | 3.3278  | 4.8738  | -0.8875 |
| YRI | PRAMEF8 | 13046223 | 4.276   | 11.2602 | -1.8697 |
| YRI | PRAMEF8 | 13051223 | 6.4485  | 14.2853 | -1.6756 |
| YRI | PRAMEF8 | 13056223 | 2.4342  | 4.0335  | -1.0821 |
| YRI | PRAMEF8 | 13061223 | 0       | 0       | 0       |
| YRI | PRAMEF8 | 13066223 | 0       | 0       | 0       |
| YRI | PRAMEF8 | 13071223 | 0       | 0       | 0       |
| YRI | PRAMEF8 | 13076223 | 0       | 0       | 0       |
| YRI | PRAMEF8 | 13081223 | 0       | 0       | 0       |
| YRI | PRAMEF8 | 13086223 | 0       | 0       | 0       |
| YRI | PRAMEF8 | 13091223 | 0       | 0       | 0       |
| YRI | PRAMEF8 | 13096223 | 0       | 0       | 0       |
| YRI | PRAMEF8 | 13101223 | 0       | 0       | 0       |
| YRI | PRAMEF8 | 13106223 | 0.4735  | 0.1681  | 1.8155  |
| YRI | PRAMEF8 | 13111223 | 1.9676  | 2.3529  | -0.4079 |
| YRI | PRAMEF8 | 13116223 | 2.1666  | 3.5293  | -1.0332 |
| YRI | PRAMEF8 | 13121223 | 5.8004  | 8.067   | -0.8271 |
| YRI | PRAMEF8 | 13126223 | 15.1752 | 15.6298 | -0.0892 |
| YRI | PRAMEF8 | 13131223 | 16.3744 | 14.1172 | 0.4881  |
| YRI | PRAMEF8 | 13136223 | 9.4727  | 7.2267  | 0.9063  |
| YRI | PRAMEF8 | 13141223 | 6.6726  | 5.8822  | 0.3841  |
| YRI | PRAMEF8 | 13146223 | 4.5564  | 6.0502  | -0.7078 |
| YRI | PRAMEF8 | 13151223 | 1.1893  | 2.689   | -1.4253 |
| YRI | PRAMEF8 | 13156223 | 1.477   | 2.689   | -1.1518 |
| YRI | PRAMEF8 | 13161223 | 1.9607  | 3.5293  | -1.1893 |
| YRI | PRAMEF8 | 13166223 | 1.4563  | 1.8487  | -0.5019 |
| YRI | PRAMEF8 | 13171223 | 7.2712  | 8.235   | -0.3451 |
| YRI | PRAMEF8 | 13176223 | 14.7555 | 22.1842 | -1.0414 |
| YRI | PRAMEF8 | 13181223 | 17.0552 | 27.3941 | -1.1812 |
| YRI | PRAMEF8 | 13186223 | 16.3432 | 20.6717 | -0.6496 |
| YRI | PRAMEF8 | 13191223 | 9.035   | 8.7392  | 0.1003  |
| YRI | PRAMEF8 | 13196223 | 2.0897  | 3.0251  | -0.8069 |
| YRI | PRAMEF8 | 13201223 | 4.1358  | 6.3864  | -1.0158 |
| YRI | PRAMEF8 | 13206223 | 4.1344  | 5.378   | -0.6545 |
| YRI | PRAMEF8 | 13211223 | 1.6918  | 4.0335  | -1.5844 |
| YRI | PRAMEF8 | 13216223 | 1.8409  | 4.7057  | -1.6958 |
| YRI | PRAMEF8 | 13221223 | 0.7876  | 1.6806  | -1.2285 |
| YRI | PRAMEF8 | 13226223 | 0       | 0       | 0       |
| YRI | PRAMEF8 | 13231223 | 0       | 0       | 0       |
| YRI | PRAMEF8 | 13236223 | 0       | 0       | 0       |
| YRI | PRAMEF8 | 13241223 | 0       | 0       | 0       |
| YRI | PRAMEF8 | 13246223 | 0       | 0       | 0       |
| YRI | PRAMEF8 | 13251223 | 0       | 0       | 0       |
| YRI | PRAMEF8 | 13256223 | 0       | 0       | 0       |

## 2\_TajimasD\_data

|     |         |          |         |         |         |
|-----|---------|----------|---------|---------|---------|
| YRI | PRAMEF8 | 13261223 | 0       | 0       | 0       |
| YRI | PRAMEF8 | 13266223 | 0       | 0       | 0       |
| YRI | PRAMEF8 | 13271223 | 0       | 0       | 0       |
| YRI | PRAMEF8 | 13276223 | 0       | 0       | 0       |
| YRI | PRAMEF8 | 13281223 | 0       | 0       | 0       |
| YRI | PRAMEF8 | 13286223 | 0       | 0       | 0       |
| YRI | PRAMEF8 | 13291223 | 0       | 0       | 0       |
| YRI | PRAMEF8 | 13296223 | 0       | 0       | 0       |
| YRI | PRAMEF8 | 13301223 | 0       | 0       | 0       |
| YRI | PRAMEF8 | 13306223 | 0       | 0       | 0       |
| YRI | PRAMEF8 | 13311223 | 0       | 0       | 0       |
| YRI | PRAMEF8 | 13316223 | 0       | 0       | 0       |
| YRI | PRAMEF8 | 13321223 | 0       | 0       | 0       |
| YRI | PRAMEF8 | 13326223 | 1.4065  | 2.5209  | -1.116  |
| YRI | PRAMEF8 | 13331223 | 1.4342  | 3.0251  | -1.3724 |
| YRI | PRAMEF8 | 13336223 | 0.0278  | 0.5042  | -1.4972 |
| YRI | PRAMEF8 | 13341223 | 0.5402  | 0.6722  | -0.3456 |
| YRI | PRAMEF8 | 13346223 | 1.9891  | 2.5209  | -0.5326 |
| YRI | PRAMEF8 | 13351223 | 4.8782  | 8.9073  | -1.3419 |
| YRI | PRAMEF8 | 13356223 | 3.8717  | 7.7309  | -1.4643 |
| YRI | PRAMEF8 | 13361223 | 1.8008  | 1.5126  | 0.4291  |
| YRI | PRAMEF8 | 13366223 | 1.5663  | 1.3445  | 0.3602  |
| YRI | PRAMEF8 | 13371223 | 1.9922  | 3.3612  | -1.0816 |
| YRI | PRAMEF8 | 13376223 | 6.9438  | 8.4031  | -0.5129 |
| YRI | PRAMEF8 | 13381223 | 13.3437 | 12.9408 | 0.0946  |
| YRI | PRAMEF8 | 13386223 | 8.1842  | 7.3947  | 0.312   |
| YRI | PRAMEF8 | 13391223 | 0       | 0       | 0       |
| YRI | PRAMEF8 | 13396223 | 0       | 0       | 0       |
| YRI | PRAMEF8 | 13401223 | 0       | 0       | 0       |
| YRI | PRAMEF8 | 13406223 | 0       | 0       | 0       |
| YRI | PRAMEF8 | 13411223 | 3.1168  | 2.5209  | 0.5968  |
| YRI | PRAMEF8 | 13416223 | 3.1168  | 2.5209  | 0.5968  |
| YRI | PRAMEF8 | 13421223 | 0.0996  | 0.3361  | -0.9494 |
| YRI | PRAMEF8 | 13426223 | 0.1449  | 0.5042  | -1.1292 |
| YRI | PRAMEF8 | 13431223 | 0.0453  | 0.1681  | -0.73   |
| YRI | PRAMEF8 | 13436223 | 0       | 0       | 0       |
| YRI | PRAMEF8 | 13441223 | 0       | 0       | 0       |
| YRI | PRAMEF8 | 13446223 | 2.6596  | 1.3445  | 2.136   |
| YRI | PRAMEF8 | 13451223 | 3.4117  | 2.0167  | 1.6679  |
| YRI | PRAMEF8 | 13456223 | 0.7522  | 0.6722  | 0.2094  |
| YRI | PRAMEF8 | 13461223 | 0.9213  | 0.3361  | 2.3493  |
| YRI | PRAMEF8 | 13466223 | 1.7736  | 1.8487  | -0.0961 |
| YRI | PRAMEF8 | 13471223 | 1.2618  | 3.1932  | -1.5929 |
| YRI | PRAMEF8 | 13476223 | 1.9987  | 3.0251  | -0.8854 |
| YRI | PRAMEF8 | 13481223 | 4.1096  | 5.2099  | -0.5956 |
| YRI | PRAMEF8 | 13486223 | 4.8068  | 6.5544  | -0.7705 |
| YRI | PRAMEF8 | 13491223 | 2.6508  | 3.1932  | -0.4473 |
| YRI | PRAMEF8 | 13496223 | 1.1549  | 3.1932  | -1.681  |
| YRI | PRAMEF8 | 13501223 | 0.9785  | 3.3612  | -1.8824 |

## 2\_TajimasD\_data

|     |         |          |        |        |         |
|-----|---------|----------|--------|--------|---------|
| YRI | PRAMEF8 | 13506223 | 0.2702 | 1.1764 | -1.6208 |
| YRI | PRAMEF8 | 13511223 | 1.8313 | 2.1848 | -0.3969 |
| YRI | PRAMEF8 | 13516223 | 2.667  | 4.7057 | -1.2068 |
| YRI | PRAMEF8 | 13521223 | 1.2    | 3.6974 | -1.8203 |
| YRI | PRAMEF8 | 13526223 | 0.2821 | 0.6722 | -1.0213 |
| YRI | PRAMEF8 | 13531223 | 1.6504 | 0.6722 | 2.5609  |
| YRI | PRAMEF8 | 13536223 | 2.5774 | 1.5126 | 1.5855  |
| YRI | PRAMEF8 | 13541223 | 1.4305 | 1.0084 | 0.8415  |
| YRI | PRAMEF8 | 13546223 | 1.0201 | 0.6722 | 0.9108  |
| YRI | PRAMEF8 | 13551223 | 1.3837 | 1.8487 | -0.5948 |
| YRI | PRAMEF8 | 13556223 | 0.8672 | 1.3445 | -0.7752 |
| YRI | PRAMEF8 | 13561223 | 0      | 0      | 0       |
| YRI | PRAMEF8 | 13566223 | 0      | 0      | 0       |
| YRI | PRAMEF8 | 13571223 | 0      | 0      | 0       |
| YRI | PRAMEF8 | 13576223 | 0      | 0      | 0       |
| YRI | PRAMEF8 | 13581223 | 0      | 0      | 0       |
| YRI | PRAMEF8 | 13586223 | 0      | 0      | 0       |
| YRI | PRAMEF8 | 13591223 | 0      | 0      | 0       |
| YRI | PRAMEF8 | 13596223 | 0      | 0      | 0       |
| YRI | PRAMEF8 | 13601223 | 0      | 0      | 0       |
| YRI | PRAMEF8 | 13606223 | 0      | 0      | 0       |
| YRI | PRAMEF8 | 13611223 | 0      | 0      | 0       |
| YRI | PRAMEF8 | 13616223 | 0      | 0      | 0       |
| YRI | PRAMEF8 | 13621223 | 0      | 0      | 0       |
| YRI | PRAMEF8 | 13626223 | 0      | 0      | 0       |
| YRI | PRAMEF8 | 13631223 | 1.1751 | 2.1848 | -1.1337 |
| YRI | PRAMEF8 | 13636223 | 1.3451 | 2.8571 | -1.3674 |
| YRI | PRAMEF8 | 13641223 | 0.3345 | 1.1764 | -1.5058 |
| YRI | PRAMEF8 | 13646223 | 0.1645 | 0.5042 | -1.0676 |
| YRI | PRAMEF8 | 13651223 | 0.0276 | 0.1681 | -0.8352 |
| YRI | PRAMEF8 | 13656223 | 0.0276 | 0.1681 | -0.8352 |
| YRI | PRAMEF8 | 13661223 | 0      | 0      | 0       |
| YRI | PRAMEF8 | 13666223 | 1.6047 | 2.3529 | -0.792  |
| YRI | PRAMEF8 | 13671223 | 1.7055 | 3.1932 | -1.2269 |
| YRI | PRAMEF8 | 13676223 | 0.1008 | 0.8403 | -1.6703 |
| YRI | PRAMEF8 | 13681223 | 0      | 0      | 0       |
| YRI | PRAMEF8 | 13686223 | 1.1727 | 0.8403 | 0.7508  |
| YRI | PRAMEF8 | 13691223 | 1.5428 | 3.0251 | -1.2787 |
| YRI | PRAMEF8 | 13696223 | 0.3701 | 2.1848 | -2.0375 |
| YRI | PRAMEF8 | 13701223 | 2.3061 | 3.3612 | -0.8336 |
| YRI | PRAMEF8 | 13706223 | 4.099  | 5.7141 | -0.8054 |
| YRI | PRAMEF8 | 13711223 | 2.5944 | 3.3612 | -0.6058 |
| YRI | PRAMEF8 | 13716223 | 2.416  | 4.2016 | -1.1664 |
| YRI | PRAMEF8 | 13721223 | 3.12   | 5.378  | -1.1883 |
| YRI | PRAMEF8 | 13726223 | 1.5693 | 2.5209 | -0.953  |
| YRI | PRAMEF8 | 13731223 | 2.5948 | 2.8571 | -0.2372 |
| YRI | PRAMEF8 | 13736223 | 3.2987 | 3.1932 | 0.087   |
| YRI | PRAMEF8 | 13741223 | 1.8783 | 1.8487 | 0.0379  |
| YRI | PRAMEF8 | 13746223 | 1.1107 | 1.1764 | -0.1175 |

## 2\_TajimasD\_data

|     |         |          |        |        |         |
|-----|---------|----------|--------|--------|---------|
| YRI | PRAMEF8 | 13751223 | 0      | 0      | 0       |
| YRI | PRAMEF8 | 13756223 | 0      | 0      | 0       |
| YRI | PRAMEF8 | 13761223 | 0      | 0      | 0       |
| YRI | PRAMEF8 | 13766223 | 1.413  | 1.0084 | 0.8066  |
| YRI | PRAMEF8 | 13771223 | 3.5252 | 5.0419 | -0.8451 |
| YRI | PRAMEF8 | 13776223 | 4.8365 | 8.4031 | -1.2535 |
| CEU | PRR11   | 58660355 | 0      | 0      | 0       |
| CEU | PRR11   | 58665355 | 0      | 0      | 0       |
| CEU | PRR11   | 58670355 | 0      | 0      | 0       |
| CEU | PRR11   | 58675355 | 0      | 0      | 0       |
| CEU | PRR11   | 58680355 | 0      | 0      | 0       |
| CEU | PRR11   | 58685355 | 0      | 0      | 0       |
| CEU | PRR11   | 58690355 | 0      | 0      | 0       |
| CEU | PRR11   | 58695355 | 0      | 0      | 0       |
| CEU | PRR11   | 58700355 | 0      | 0      | 0       |
| CEU | PRR11   | 58705355 | 0      | 0      | 0       |
| CEU | PRR11   | 58710355 | 0      | 0      | 0       |
| CEU | PRR11   | 58715355 | 0      | 0      | 0       |
| CEU | PRR11   | 58720355 | 0      | 0      | 0       |
| CEU | PRR11   | 58725355 | 0      | 0      | 0       |
| CEU | PRR11   | 58730355 | 0      | 0      | 0       |
| CEU | PRR11   | 58735355 | 0      | 0      | 0       |
| CEU | PRR11   | 58740355 | 0      | 0      | 0       |
| CEU | PRR11   | 58745355 | 0      | 0      | 0       |
| CEU | PRR11   | 58750355 | 0      | 0      | 0       |
| CEU | PRR11   | 58755355 | 0      | 0      | 0       |
| CEU | PRR11   | 58760355 | 0      | 0      | 0       |
| CEU | PRR11   | 58765355 | 0      | 0      | 0       |
| CEU | PRR11   | 58770355 | 0      | 0      | 0       |
| CEU | PRR11   | 58775355 | 0      | 0      | 0       |
| CEU | PRR11   | 58780355 | 0      | 0      | 0       |
| CEU | PRR11   | 58785355 | 0      | 0      | 0       |
| CEU | PRR11   | 58790355 | 0      | 0      | 0       |
| CEU | PRR11   | 58795355 | 0      | 0      | 0       |
| CEU | PRR11   | 58800355 | 0      | 0      | 0       |
| CEU | PRR11   | 58805355 | 0      | 0      | 0       |
| CEU | PRR11   | 58810355 | 0      | 0      | 0       |
| CEU | PRR11   | 58815355 | 0      | 0      | 0       |
| CEU | PRR11   | 58820355 | 0      | 0      | 0       |
| CEU | PRR11   | 58825355 | 0      | 0      | 0       |
| CEU | PRR11   | 58830355 | 0      | 0      | 0       |
| CEU | PRR11   | 58835355 | 0      | 0      | 0       |
| CEU | PRR11   | 58840355 | 0      | 0      | 0       |
| CEU | PRR11   | 58845355 | 0      | 0      | 0       |
| CEU | PRR11   | 58850355 | 0      | 0      | 0       |
| CEU | PRR11   | 58855355 | 0      | 0      | 0       |
| CEU | PRR11   | 58860355 | 0      | 0      | 0       |
| CEU | PRR11   | 58865355 | 0      | 0      | 0       |
| CEU | PRR11   | 58870355 | 0      | 0      | 0       |

## 2\_TajimasD\_data

|     |       |          |   |   |   |
|-----|-------|----------|---|---|---|
| CEU | PRR11 | 58875355 | 0 | 0 | 0 |
| CEU | PRR11 | 58880355 | 0 | 0 | 0 |
| CEU | PRR11 | 58885355 | 0 | 0 | 0 |
| CEU | PRR11 | 58890355 | 0 | 0 | 0 |
| CEU | PRR11 | 58895355 | 0 | 0 | 0 |
| CEU | PRR11 | 58900355 | 0 | 0 | 0 |
| CEU | PRR11 | 58905355 | 0 | 0 | 0 |
| CEU | PRR11 | 58910355 | 0 | 0 | 0 |
| CEU | PRR11 | 58915355 | 0 | 0 | 0 |
| CEU | PRR11 | 58920355 | 0 | 0 | 0 |
| CEU | PRR11 | 58925355 | 0 | 0 | 0 |
| CEU | PRR11 | 58930355 | 0 | 0 | 0 |
| CEU | PRR11 | 58935355 | 0 | 0 | 0 |
| CEU | PRR11 | 58940355 | 0 | 0 | 0 |
| CEU | PRR11 | 58945355 | 0 | 0 | 0 |
| CEU | PRR11 | 58950355 | 0 | 0 | 0 |
| CEU | PRR11 | 58955355 | 0 | 0 | 0 |
| CEU | PRR11 | 58960355 | 0 | 0 | 0 |
| CEU | PRR11 | 58965355 | 0 | 0 | 0 |
| CEU | PRR11 | 58970355 | 0 | 0 | 0 |
| CEU | PRR11 | 58975355 | 0 | 0 | 0 |
| CEU | PRR11 | 58980355 | 0 | 0 | 0 |
| CEU | PRR11 | 58985355 | 0 | 0 | 0 |
| CEU | PRR11 | 58990355 | 0 | 0 | 0 |
| CEU | PRR11 | 58995355 | 0 | 0 | 0 |
| CEU | PRR11 | 59000355 | 0 | 0 | 0 |
| CEU | PRR11 | 59005355 | 0 | 0 | 0 |
| CEU | PRR11 | 59010355 | 0 | 0 | 0 |
| CEU | PRR11 | 59015355 | 0 | 0 | 0 |
| CEU | PRR11 | 59020355 | 0 | 0 | 0 |
| CEU | PRR11 | 59025355 | 0 | 0 | 0 |
| CEU | PRR11 | 59030355 | 0 | 0 | 0 |
| CEU | PRR11 | 59035355 | 0 | 0 | 0 |
| CEU | PRR11 | 59040355 | 0 | 0 | 0 |
| CEU | PRR11 | 59045355 | 0 | 0 | 0 |
| CEU | PRR11 | 59050355 | 0 | 0 | 0 |
| CEU | PRR11 | 59055355 | 0 | 0 | 0 |
| CEU | PRR11 | 59060355 | 0 | 0 | 0 |
| CEU | PRR11 | 59065355 | 0 | 0 | 0 |
| CEU | PRR11 | 59070355 | 0 | 0 | 0 |
| CEU | PRR11 | 59075355 | 0 | 0 | 0 |
| CEU | PRR11 | 59080355 | 0 | 0 | 0 |
| CEU | PRR11 | 59085355 | 0 | 0 | 0 |
| CEU | PRR11 | 59090355 | 0 | 0 | 0 |
| CEU | PRR11 | 59095355 | 0 | 0 | 0 |
| CEU | PRR11 | 59100355 | 0 | 0 | 0 |
| CEU | PRR11 | 59105355 | 0 | 0 | 0 |
| CEU | PRR11 | 59110355 | 0 | 0 | 0 |
| CEU | PRR11 | 59115355 | 0 | 0 | 0 |

## 2\_TajimasD\_data

|     |       |          |   |   |   |
|-----|-------|----------|---|---|---|
| CEU | PRR11 | 59120355 | 0 | 0 | 0 |
| CEU | PRR11 | 59125355 | 0 | 0 | 0 |
| CEU | PRR11 | 59130355 | 0 | 0 | 0 |
| CEU | PRR11 | 59135355 | 0 | 0 | 0 |
| CEU | PRR11 | 59140355 | 0 | 0 | 0 |
| CEU | PRR11 | 59145355 | 0 | 0 | 0 |
| CEU | PRR11 | 59150355 | 0 | 0 | 0 |
| CEU | PRR11 | 59155355 | 0 | 0 | 0 |
| CEU | PRR11 | 59160355 | 0 | 0 | 0 |
| CEU | PRR11 | 59165355 | 0 | 0 | 0 |
| CEU | PRR11 | 59170355 | 0 | 0 | 0 |
| CEU | PRR11 | 59175355 | 0 | 0 | 0 |
| CEU | PRR11 | 59180355 | 0 | 0 | 0 |
| CEU | PRR11 | 59185355 | 0 | 0 | 0 |
| CEU | PRR11 | 59190355 | 0 | 0 | 0 |
| CEU | PRR11 | 59195355 | 0 | 0 | 0 |
| CEU | PRR11 | 59200355 | 0 | 0 | 0 |
| CEU | PRR11 | 59205355 | 0 | 0 | 0 |
| CEU | PRR11 | 59210355 | 0 | 0 | 0 |
| CEU | PRR11 | 59215355 | 0 | 0 | 0 |
| CEU | PRR11 | 59220355 | 0 | 0 | 0 |
| CEU | PRR11 | 59225355 | 0 | 0 | 0 |
| CEU | PRR11 | 59230355 | 0 | 0 | 0 |
| CEU | PRR11 | 59235355 | 0 | 0 | 0 |
| CEU | PRR11 | 59240355 | 0 | 0 | 0 |
| CEU | PRR11 | 59245355 | 0 | 0 | 0 |
| CEU | PRR11 | 59250355 | 0 | 0 | 0 |
| CEU | PRR11 | 59255355 | 0 | 0 | 0 |
| CEU | PRR11 | 59260355 | 0 | 0 | 0 |
| CEU | PRR11 | 59265355 | 0 | 0 | 0 |
| CEU | PRR11 | 59270355 | 0 | 0 | 0 |
| CEU | PRR11 | 59275355 | 0 | 0 | 0 |
| CEU | PRR11 | 59280355 | 0 | 0 | 0 |
| CEU | PRR11 | 59285355 | 0 | 0 | 0 |
| CEU | PRR11 | 59290355 | 0 | 0 | 0 |
| CEU | PRR11 | 59295355 | 0 | 0 | 0 |
| CEU | PRR11 | 59300355 | 0 | 0 | 0 |
| CEU | PRR11 | 59305355 | 0 | 0 | 0 |
| CEU | PRR11 | 59310355 | 0 | 0 | 0 |
| CEU | PRR11 | 59315355 | 0 | 0 | 0 |
| CEU | PRR11 | 59320355 | 0 | 0 | 0 |
| CEU | PRR11 | 59325355 | 0 | 0 | 0 |
| CEU | PRR11 | 59330355 | 0 | 0 | 0 |
| CEU | PRR11 | 59335355 | 0 | 0 | 0 |
| CEU | PRR11 | 59340355 | 0 | 0 | 0 |
| CEU | PRR11 | 59345355 | 0 | 0 | 0 |
| CEU | PRR11 | 59350355 | 0 | 0 | 0 |
| CEU | PRR11 | 59355355 | 0 | 0 | 0 |
| CEU | PRR11 | 59360355 | 0 | 0 | 0 |



## 2\_TajimasD\_data

|     |       |          |   |   |   |
|-----|-------|----------|---|---|---|
| CEU | PRR11 | 59365355 | 0 | 0 | 0 |
| CEU | PRR11 | 59370355 | 0 | 0 | 0 |
| CEU | PRR11 | 59375355 | 0 | 0 | 0 |
| CEU | PRR11 | 59380355 | 0 | 0 | 0 |
| CEU | PRR11 | 59385355 | 0 | 0 | 0 |
| CEU | PRR11 | 59390355 | 0 | 0 | 0 |
| CEU | PRR11 | 59395355 | 0 | 0 | 0 |
| CEU | PRR11 | 59400355 | 0 | 0 | 0 |
| CEU | PRR11 | 59405355 | 0 | 0 | 0 |
| CEU | PRR11 | 59410355 | 0 | 0 | 0 |
| CEU | PRR11 | 59415355 | 0 | 0 | 0 |
| CEU | PRR11 | 59420355 | 0 | 0 | 0 |
| CEU | PRR11 | 59425355 | 0 | 0 | 0 |
| CEU | PRR11 | 59430355 | 0 | 0 | 0 |
| CEU | PRR11 | 59435355 | 0 | 0 | 0 |
| CEU | PRR11 | 59440355 | 0 | 0 | 0 |
| CEU | PRR11 | 59445355 | 0 | 0 | 0 |
| CEU | PRR11 | 59450355 | 0 | 0 | 0 |
| CEU | PRR11 | 59455355 | 0 | 0 | 0 |
| CEU | PRR11 | 59460355 | 0 | 0 | 0 |
| CEU | PRR11 | 59465355 | 0 | 0 | 0 |
| CEU | PRR11 | 59470355 | 0 | 0 | 0 |
| CEU | PRR11 | 59475355 | 0 | 0 | 0 |
| CEU | PRR11 | 59480355 | 0 | 0 | 0 |
| CEU | PRR11 | 59485355 | 0 | 0 | 0 |
| CEU | PRR11 | 59490355 | 0 | 0 | 0 |
| CEU | PRR11 | 59495355 | 0 | 0 | 0 |
| CEU | PRR11 | 59500355 | 0 | 0 | 0 |
| CEU | PRR11 | 59505355 | 0 | 0 | 0 |
| CEU | PRR11 | 59510355 | 0 | 0 | 0 |
| CEU | PRR11 | 59515355 | 0 | 0 | 0 |
| CEU | PRR11 | 59520355 | 0 | 0 | 0 |
| CEU | PRR11 | 59525355 | 0 | 0 | 0 |
| CEU | PRR11 | 59530355 | 0 | 0 | 0 |
| CEU | PRR11 | 59535355 | 0 | 0 | 0 |
| CEU | PRR11 | 59540355 | 0 | 0 | 0 |
| CEU | PRR11 | 59545355 | 0 | 0 | 0 |
| CEU | PRR11 | 59550355 | 0 | 0 | 0 |
| CEU | PRR11 | 59555355 | 0 | 0 | 0 |
| CEU | PRR11 | 59560355 | 0 | 0 | 0 |
| CEU | PRR11 | 59565355 | 0 | 0 | 0 |
| CEU | PRR11 | 59570355 | 0 | 0 | 0 |
| CEU | PRR11 | 59575355 | 0 | 0 | 0 |
| CEU | PRR11 | 59580355 | 0 | 0 | 0 |
| CEU | PRR11 | 59585355 | 0 | 0 | 0 |
| CEU | PRR11 | 59590355 | 0 | 0 | 0 |
| CEU | PRR11 | 59595355 | 0 | 0 | 0 |
| CEU | PRR11 | 59600355 | 0 | 0 | 0 |
| CEU | PRR11 | 59605355 | 0 | 0 | 0 |

## 2\_TajimasD\_data

|     |       |          |   |   |   |
|-----|-------|----------|---|---|---|
| CEU | PRR11 | 59610355 | 0 | 0 | 0 |
| CEU | PRR11 | 59615355 | 0 | 0 | 0 |
| CEU | PRR11 | 59620355 | 0 | 0 | 0 |
| CEU | PRR11 | 59625355 | 0 | 0 | 0 |
| CEU | PRR11 | 59630355 | 0 | 0 | 0 |
| CEU | PRR11 | 59635355 | 0 | 0 | 0 |
| CEU | PRR11 | 59640355 | 0 | 0 | 0 |
| CEU | PRR11 | 59645355 | 0 | 0 | 0 |
| CEU | PRR11 | 59650355 | 0 | 0 | 0 |
| CEU | PRR11 | 59655355 | 0 | 0 | 0 |
| CEU | PRR11 | 59660355 | 0 | 0 | 0 |
| CEU | PRR11 | 59665355 | 0 | 0 | 0 |
| CEU | PRR11 | 59670355 | 0 | 0 | 0 |
| CEU | PRR11 | 59675355 | 0 | 0 | 0 |
| CEU | PRR11 | 59680355 | 0 | 0 | 0 |
| CEU | PRR11 | 59685355 | 0 | 0 | 0 |
| CEU | PRR11 | 59690355 | 0 | 0 | 0 |
| CEU | PRR11 | 59695355 | 0 | 0 | 0 |
| CEU | PRR11 | 59700355 | 0 | 0 | 0 |
| CHB | PRR11 | 58660355 | 0 | 0 | 0 |
| CHB | PRR11 | 58665355 | 0 | 0 | 0 |
| CHB | PRR11 | 58670355 | 0 | 0 | 0 |
| CHB | PRR11 | 58675355 | 0 | 0 | 0 |
| CHB | PRR11 | 58680355 | 0 | 0 | 0 |
| CHB | PRR11 | 58685355 | 0 | 0 | 0 |
| CHB | PRR11 | 58690355 | 0 | 0 | 0 |
| CHB | PRR11 | 58695355 | 0 | 0 | 0 |
| CHB | PRR11 | 58700355 | 0 | 0 | 0 |
| CHB | PRR11 | 58705355 | 0 | 0 | 0 |
| CHB | PRR11 | 58710355 | 0 | 0 | 0 |
| CHB | PRR11 | 58715355 | 0 | 0 | 0 |
| CHB | PRR11 | 58720355 | 0 | 0 | 0 |
| CHB | PRR11 | 58725355 | 0 | 0 | 0 |
| CHB | PRR11 | 58730355 | 0 | 0 | 0 |
| CHB | PRR11 | 58735355 | 0 | 0 | 0 |
| CHB | PRR11 | 58740355 | 0 | 0 | 0 |
| CHB | PRR11 | 58745355 | 0 | 0 | 0 |
| CHB | PRR11 | 58750355 | 0 | 0 | 0 |
| CHB | PRR11 | 58755355 | 0 | 0 | 0 |
| CHB | PRR11 | 58760355 | 0 | 0 | 0 |
| CHB | PRR11 | 58765355 | 0 | 0 | 0 |
| CHB | PRR11 | 58770355 | 0 | 0 | 0 |
| CHB | PRR11 | 58775355 | 0 | 0 | 0 |
| CHB | PRR11 | 58780355 | 0 | 0 | 0 |
| CHB | PRR11 | 58785355 | 0 | 0 | 0 |
| CHB | PRR11 | 58790355 | 0 | 0 | 0 |
| CHB | PRR11 | 58795355 | 0 | 0 | 0 |
| CHB | PRR11 | 58800355 | 0 | 0 | 0 |
| CHB | PRR11 | 58805355 | 0 | 0 | 0 |

## 2\_TajimasD\_data

|     |       |          |   |   |   |
|-----|-------|----------|---|---|---|
| CHB | PRR11 | 58810355 | 0 | 0 | 0 |
| CHB | PRR11 | 58815355 | 0 | 0 | 0 |
| CHB | PRR11 | 58820355 | 0 | 0 | 0 |
| CHB | PRR11 | 58825355 | 0 | 0 | 0 |
| CHB | PRR11 | 58830355 | 0 | 0 | 0 |
| CHB | PRR11 | 58835355 | 0 | 0 | 0 |
| CHB | PRR11 | 58840355 | 0 | 0 | 0 |
| CHB | PRR11 | 58845355 | 0 | 0 | 0 |
| CHB | PRR11 | 58850355 | 0 | 0 | 0 |
| CHB | PRR11 | 58855355 | 0 | 0 | 0 |
| CHB | PRR11 | 58860355 | 0 | 0 | 0 |
| CHB | PRR11 | 58865355 | 0 | 0 | 0 |
| CHB | PRR11 | 58870355 | 0 | 0 | 0 |
| CHB | PRR11 | 58875355 | 0 | 0 | 0 |
| CHB | PRR11 | 58880355 | 0 | 0 | 0 |
| CHB | PRR11 | 58885355 | 0 | 0 | 0 |
| CHB | PRR11 | 58890355 | 0 | 0 | 0 |
| CHB | PRR11 | 58895355 | 0 | 0 | 0 |
| CHB | PRR11 | 58900355 | 0 | 0 | 0 |
| CHB | PRR11 | 58905355 | 0 | 0 | 0 |
| CHB | PRR11 | 58910355 | 0 | 0 | 0 |
| CHB | PRR11 | 58915355 | 0 | 0 | 0 |
| CHB | PRR11 | 58920355 | 0 | 0 | 0 |
| CHB | PRR11 | 58925355 | 0 | 0 | 0 |
| CHB | PRR11 | 58930355 | 0 | 0 | 0 |
| CHB | PRR11 | 58935355 | 0 | 0 | 0 |
| CHB | PRR11 | 58940355 | 0 | 0 | 0 |
| CHB | PRR11 | 58945355 | 0 | 0 | 0 |
| CHB | PRR11 | 58950355 | 0 | 0 | 0 |
| CHB | PRR11 | 58955355 | 0 | 0 | 0 |
| CHB | PRR11 | 58960355 | 0 | 0 | 0 |
| CHB | PRR11 | 58965355 | 0 | 0 | 0 |
| CHB | PRR11 | 58970355 | 0 | 0 | 0 |
| CHB | PRR11 | 58975355 | 0 | 0 | 0 |
| CHB | PRR11 | 58980355 | 0 | 0 | 0 |
| CHB | PRR11 | 58985355 | 0 | 0 | 0 |
| CHB | PRR11 | 58990355 | 0 | 0 | 0 |
| CHB | PRR11 | 58995355 | 0 | 0 | 0 |
| CHB | PRR11 | 59000355 | 0 | 0 | 0 |
| CHB | PRR11 | 59005355 | 0 | 0 | 0 |
| CHB | PRR11 | 59010355 | 0 | 0 | 0 |
| CHB | PRR11 | 59015355 | 0 | 0 | 0 |
| CHB | PRR11 | 59020355 | 0 | 0 | 0 |
| CHB | PRR11 | 59025355 | 0 | 0 | 0 |
| CHB | PRR11 | 59030355 | 0 | 0 | 0 |
| CHB | PRR11 | 59035355 | 0 | 0 | 0 |
| CHB | PRR11 | 59040355 | 0 | 0 | 0 |
| CHB | PRR11 | 59045355 | 0 | 0 | 0 |
| CHB | PRR11 | 59050355 | 0 | 0 | 0 |

## 2\_TajimasD\_data

|     |       |          |   |   |   |
|-----|-------|----------|---|---|---|
| CHB | PRR11 | 59055355 | 0 | 0 | 0 |
| CHB | PRR11 | 59060355 | 0 | 0 | 0 |
| CHB | PRR11 | 59065355 | 0 | 0 | 0 |
| CHB | PRR11 | 59070355 | 0 | 0 | 0 |
| CHB | PRR11 | 59075355 | 0 | 0 | 0 |
| CHB | PRR11 | 59080355 | 0 | 0 | 0 |
| CHB | PRR11 | 59085355 | 0 | 0 | 0 |
| CHB | PRR11 | 59090355 | 0 | 0 | 0 |
| CHB | PRR11 | 59095355 | 0 | 0 | 0 |
| CHB | PRR11 | 59100355 | 0 | 0 | 0 |
| CHB | PRR11 | 59105355 | 0 | 0 | 0 |
| CHB | PRR11 | 59110355 | 0 | 0 | 0 |
| CHB | PRR11 | 59115355 | 0 | 0 | 0 |
| CHB | PRR11 | 59120355 | 0 | 0 | 0 |
| CHB | PRR11 | 59125355 | 0 | 0 | 0 |
| CHB | PRR11 | 59130355 | 0 | 0 | 0 |
| CHB | PRR11 | 59135355 | 0 | 0 | 0 |
| CHB | PRR11 | 59140355 | 0 | 0 | 0 |
| CHB | PRR11 | 59145355 | 0 | 0 | 0 |
| CHB | PRR11 | 59150355 | 0 | 0 | 0 |
| CHB | PRR11 | 59155355 | 0 | 0 | 0 |
| CHB | PRR11 | 59160355 | 0 | 0 | 0 |
| CHB | PRR11 | 59165355 | 0 | 0 | 0 |
| CHB | PRR11 | 59170355 | 0 | 0 | 0 |
| CHB | PRR11 | 59175355 | 0 | 0 | 0 |
| CHB | PRR11 | 59180355 | 0 | 0 | 0 |
| CHB | PRR11 | 59185355 | 0 | 0 | 0 |
| CHB | PRR11 | 59190355 | 0 | 0 | 0 |
| CHB | PRR11 | 59195355 | 0 | 0 | 0 |
| CHB | PRR11 | 59200355 | 0 | 0 | 0 |
| CHB | PRR11 | 59205355 | 0 | 0 | 0 |
| CHB | PRR11 | 59210355 | 0 | 0 | 0 |
| CHB | PRR11 | 59215355 | 0 | 0 | 0 |
| CHB | PRR11 | 59220355 | 0 | 0 | 0 |
| CHB | PRR11 | 59225355 | 0 | 0 | 0 |
| CHB | PRR11 | 59230355 | 0 | 0 | 0 |
| CHB | PRR11 | 59235355 | 0 | 0 | 0 |
| CHB | PRR11 | 59240355 | 0 | 0 | 0 |
| CHB | PRR11 | 59245355 | 0 | 0 | 0 |
| CHB | PRR11 | 59250355 | 0 | 0 | 0 |
| CHB | PRR11 | 59255355 | 0 | 0 | 0 |
| CHB | PRR11 | 59260355 | 0 | 0 | 0 |
| CHB | PRR11 | 59265355 | 0 | 0 | 0 |
| CHB | PRR11 | 59270355 | 0 | 0 | 0 |
| CHB | PRR11 | 59275355 | 0 | 0 | 0 |
| CHB | PRR11 | 59280355 | 0 | 0 | 0 |
| CHB | PRR11 | 59285355 | 0 | 0 | 0 |
| CHB | PRR11 | 59290355 | 0 | 0 | 0 |
| CHB | PRR11 | 59295355 | 0 | 0 | 0 |

## 2\_TajimasD\_data

|     |       |          |   |   |   |
|-----|-------|----------|---|---|---|
| CHB | PRR11 | 59300355 | 0 | 0 | 0 |
| CHB | PRR11 | 59305355 | 0 | 0 | 0 |
| CHB | PRR11 | 59310355 | 0 | 0 | 0 |
| CHB | PRR11 | 59315355 | 0 | 0 | 0 |
| CHB | PRR11 | 59320355 | 0 | 0 | 0 |
| CHB | PRR11 | 59325355 | 0 | 0 | 0 |
| CHB | PRR11 | 59330355 | 0 | 0 | 0 |
| CHB | PRR11 | 59335355 | 0 | 0 | 0 |
| CHB | PRR11 | 59340355 | 0 | 0 | 0 |
| CHB | PRR11 | 59345355 | 0 | 0 | 0 |
| CHB | PRR11 | 59350355 | 0 | 0 | 0 |
| CHB | PRR11 | 59355355 | 0 | 0 | 0 |
| CHB | PRR11 | 59360355 | 0 | 0 | 0 |
| CHB | PRR11 | 59365355 | 0 | 0 | 0 |
| CHB | PRR11 | 59370355 | 0 | 0 | 0 |
| CHB | PRR11 | 59375355 | 0 | 0 | 0 |
| CHB | PRR11 | 59380355 | 0 | 0 | 0 |
| CHB | PRR11 | 59385355 | 0 | 0 | 0 |
| CHB | PRR11 | 59390355 | 0 | 0 | 0 |
| CHB | PRR11 | 59395355 | 0 | 0 | 0 |
| CHB | PRR11 | 59400355 | 0 | 0 | 0 |
| CHB | PRR11 | 59405355 | 0 | 0 | 0 |
| CHB | PRR11 | 59410355 | 0 | 0 | 0 |
| CHB | PRR11 | 59415355 | 0 | 0 | 0 |
| CHB | PRR11 | 59420355 | 0 | 0 | 0 |
| CHB | PRR11 | 59425355 | 0 | 0 | 0 |
| CHB | PRR11 | 59430355 | 0 | 0 | 0 |
| CHB | PRR11 | 59435355 | 0 | 0 | 0 |
| CHB | PRR11 | 59440355 | 0 | 0 | 0 |
| CHB | PRR11 | 59445355 | 0 | 0 | 0 |
| CHB | PRR11 | 59450355 | 0 | 0 | 0 |
| CHB | PRR11 | 59455355 | 0 | 0 | 0 |
| CHB | PRR11 | 59460355 | 0 | 0 | 0 |
| CHB | PRR11 | 59465355 | 0 | 0 | 0 |
| CHB | PRR11 | 59470355 | 0 | 0 | 0 |
| CHB | PRR11 | 59475355 | 0 | 0 | 0 |
| CHB | PRR11 | 59480355 | 0 | 0 | 0 |
| CHB | PRR11 | 59485355 | 0 | 0 | 0 |
| CHB | PRR11 | 59490355 | 0 | 0 | 0 |
| CHB | PRR11 | 59495355 | 0 | 0 | 0 |
| CHB | PRR11 | 59500355 | 0 | 0 | 0 |
| CHB | PRR11 | 59505355 | 0 | 0 | 0 |
| CHB | PRR11 | 59510355 | 0 | 0 | 0 |
| CHB | PRR11 | 59515355 | 0 | 0 | 0 |
| CHB | PRR11 | 59520355 | 0 | 0 | 0 |
| CHB | PRR11 | 59525355 | 0 | 0 | 0 |
| CHB | PRR11 | 59530355 | 0 | 0 | 0 |
| CHB | PRR11 | 59535355 | 0 | 0 | 0 |
| CHB | PRR11 | 59540355 | 0 | 0 | 0 |

## 2\_TajimasD\_data

|     |       |          |   |   |   |
|-----|-------|----------|---|---|---|
| CHB | PRR11 | 59545355 | 0 | 0 | 0 |
| CHB | PRR11 | 59550355 | 0 | 0 | 0 |
| CHB | PRR11 | 59555355 | 0 | 0 | 0 |
| CHB | PRR11 | 59560355 | 0 | 0 | 0 |
| CHB | PRR11 | 59565355 | 0 | 0 | 0 |
| CHB | PRR11 | 59570355 | 0 | 0 | 0 |
| CHB | PRR11 | 59575355 | 0 | 0 | 0 |
| CHB | PRR11 | 59580355 | 0 | 0 | 0 |
| CHB | PRR11 | 59585355 | 0 | 0 | 0 |
| CHB | PRR11 | 59590355 | 0 | 0 | 0 |
| CHB | PRR11 | 59595355 | 0 | 0 | 0 |
| CHB | PRR11 | 59600355 | 0 | 0 | 0 |
| CHB | PRR11 | 59605355 | 0 | 0 | 0 |
| CHB | PRR11 | 59610355 | 0 | 0 | 0 |
| CHB | PRR11 | 59615355 | 0 | 0 | 0 |
| CHB | PRR11 | 59620355 | 0 | 0 | 0 |
| CHB | PRR11 | 59625355 | 0 | 0 | 0 |
| CHB | PRR11 | 59630355 | 0 | 0 | 0 |
| CHB | PRR11 | 59635355 | 0 | 0 | 0 |
| CHB | PRR11 | 59640355 | 0 | 0 | 0 |
| CHB | PRR11 | 59645355 | 0 | 0 | 0 |
| CHB | PRR11 | 59650355 | 0 | 0 | 0 |
| CHB | PRR11 | 59655355 | 0 | 0 | 0 |
| CHB | PRR11 | 59660355 | 0 | 0 | 0 |
| CHB | PRR11 | 59665355 | 0 | 0 | 0 |
| CHB | PRR11 | 59670355 | 0 | 0 | 0 |
| CHB | PRR11 | 59675355 | 0 | 0 | 0 |
| CHB | PRR11 | 59680355 | 0 | 0 | 0 |
| CHB | PRR11 | 59685355 | 0 | 0 | 0 |
| CHB | PRR11 | 59690355 | 0 | 0 | 0 |
| CHB | PRR11 | 59695355 | 0 | 0 | 0 |
| CHB | PRR11 | 59700355 | 0 | 0 | 0 |
| YRI | PRR11 | 58660355 | 0 | 0 | 0 |
| YRI | PRR11 | 58665355 | 0 | 0 | 0 |
| YRI | PRR11 | 58670355 | 0 | 0 | 0 |
| YRI | PRR11 | 58675355 | 0 | 0 | 0 |
| YRI | PRR11 | 58680355 | 0 | 0 | 0 |
| YRI | PRR11 | 58685355 | 0 | 0 | 0 |
| YRI | PRR11 | 58690355 | 0 | 0 | 0 |
| YRI | PRR11 | 58695355 | 0 | 0 | 0 |
| YRI | PRR11 | 58700355 | 0 | 0 | 0 |
| YRI | PRR11 | 58705355 | 0 | 0 | 0 |
| YRI | PRR11 | 58710355 | 0 | 0 | 0 |
| YRI | PRR11 | 58715355 | 0 | 0 | 0 |
| YRI | PRR11 | 58720355 | 0 | 0 | 0 |
| YRI | PRR11 | 58725355 | 0 | 0 | 0 |
| YRI | PRR11 | 58730355 | 0 | 0 | 0 |
| YRI | PRR11 | 58735355 | 0 | 0 | 0 |
| YRI | PRR11 | 58740355 | 0 | 0 | 0 |

## 2\_TajimasD\_data

|     |       |          |   |   |   |
|-----|-------|----------|---|---|---|
| YRI | PRR11 | 58745355 | 0 | 0 | 0 |
| YRI | PRR11 | 58750355 | 0 | 0 | 0 |
| YRI | PRR11 | 58755355 | 0 | 0 | 0 |
| YRI | PRR11 | 58760355 | 0 | 0 | 0 |
| YRI | PRR11 | 58765355 | 0 | 0 | 0 |
| YRI | PRR11 | 58770355 | 0 | 0 | 0 |
| YRI | PRR11 | 58775355 | 0 | 0 | 0 |
| YRI | PRR11 | 58780355 | 0 | 0 | 0 |
| YRI | PRR11 | 58785355 | 0 | 0 | 0 |
| YRI | PRR11 | 58790355 | 0 | 0 | 0 |
| YRI | PRR11 | 58795355 | 0 | 0 | 0 |
| YRI | PRR11 | 58800355 | 0 | 0 | 0 |
| YRI | PRR11 | 58805355 | 0 | 0 | 0 |
| YRI | PRR11 | 58810355 | 0 | 0 | 0 |
| YRI | PRR11 | 58815355 | 0 | 0 | 0 |
| YRI | PRR11 | 58820355 | 0 | 0 | 0 |
| YRI | PRR11 | 58825355 | 0 | 0 | 0 |
| YRI | PRR11 | 58830355 | 0 | 0 | 0 |
| YRI | PRR11 | 58835355 | 0 | 0 | 0 |
| YRI | PRR11 | 58840355 | 0 | 0 | 0 |
| YRI | PRR11 | 58845355 | 0 | 0 | 0 |
| YRI | PRR11 | 58850355 | 0 | 0 | 0 |
| YRI | PRR11 | 58855355 | 0 | 0 | 0 |
| YRI | PRR11 | 58860355 | 0 | 0 | 0 |
| YRI | PRR11 | 58865355 | 0 | 0 | 0 |
| YRI | PRR11 | 58870355 | 0 | 0 | 0 |
| YRI | PRR11 | 58875355 | 0 | 0 | 0 |
| YRI | PRR11 | 58880355 | 0 | 0 | 0 |
| YRI | PRR11 | 58885355 | 0 | 0 | 0 |
| YRI | PRR11 | 58890355 | 0 | 0 | 0 |
| YRI | PRR11 | 58895355 | 0 | 0 | 0 |
| YRI | PRR11 | 58900355 | 0 | 0 | 0 |
| YRI | PRR11 | 58905355 | 0 | 0 | 0 |
| YRI | PRR11 | 58910355 | 0 | 0 | 0 |
| YRI | PRR11 | 58915355 | 0 | 0 | 0 |
| YRI | PRR11 | 58920355 | 0 | 0 | 0 |
| YRI | PRR11 | 58925355 | 0 | 0 | 0 |
| YRI | PRR11 | 58930355 | 0 | 0 | 0 |
| YRI | PRR11 | 58935355 | 0 | 0 | 0 |
| YRI | PRR11 | 58940355 | 0 | 0 | 0 |
| YRI | PRR11 | 58945355 | 0 | 0 | 0 |
| YRI | PRR11 | 58950355 | 0 | 0 | 0 |
| YRI | PRR11 | 58955355 | 0 | 0 | 0 |
| YRI | PRR11 | 58960355 | 0 | 0 | 0 |
| YRI | PRR11 | 58965355 | 0 | 0 | 0 |
| YRI | PRR11 | 58970355 | 0 | 0 | 0 |
| YRI | PRR11 | 58975355 | 0 | 0 | 0 |
| YRI | PRR11 | 58980355 | 0 | 0 | 0 |
| YRI | PRR11 | 58985355 | 0 | 0 | 0 |

## 2\_TajimasD\_data

|     |       |          |   |   |   |
|-----|-------|----------|---|---|---|
| YRI | PRR11 | 58990355 | 0 | 0 | 0 |
| YRI | PRR11 | 58995355 | 0 | 0 | 0 |
| YRI | PRR11 | 59000355 | 0 | 0 | 0 |
| YRI | PRR11 | 59005355 | 0 | 0 | 0 |
| YRI | PRR11 | 59010355 | 0 | 0 | 0 |
| YRI | PRR11 | 59015355 | 0 | 0 | 0 |
| YRI | PRR11 | 59020355 | 0 | 0 | 0 |
| YRI | PRR11 | 59025355 | 0 | 0 | 0 |
| YRI | PRR11 | 59030355 | 0 | 0 | 0 |
| YRI | PRR11 | 59035355 | 0 | 0 | 0 |
| YRI | PRR11 | 59040355 | 0 | 0 | 0 |
| YRI | PRR11 | 59045355 | 0 | 0 | 0 |
| YRI | PRR11 | 59050355 | 0 | 0 | 0 |
| YRI | PRR11 | 59055355 | 0 | 0 | 0 |
| YRI | PRR11 | 59060355 | 0 | 0 | 0 |
| YRI | PRR11 | 59065355 | 0 | 0 | 0 |
| YRI | PRR11 | 59070355 | 0 | 0 | 0 |
| YRI | PRR11 | 59075355 | 0 | 0 | 0 |
| YRI | PRR11 | 59080355 | 0 | 0 | 0 |
| YRI | PRR11 | 59085355 | 0 | 0 | 0 |
| YRI | PRR11 | 59090355 | 0 | 0 | 0 |
| YRI | PRR11 | 59095355 | 0 | 0 | 0 |
| YRI | PRR11 | 59100355 | 0 | 0 | 0 |
| YRI | PRR11 | 59105355 | 0 | 0 | 0 |
| YRI | PRR11 | 59110355 | 0 | 0 | 0 |
| YRI | PRR11 | 59115355 | 0 | 0 | 0 |
| YRI | PRR11 | 59120355 | 0 | 0 | 0 |
| YRI | PRR11 | 59125355 | 0 | 0 | 0 |
| YRI | PRR11 | 59130355 | 0 | 0 | 0 |
| YRI | PRR11 | 59135355 | 0 | 0 | 0 |
| YRI | PRR11 | 59140355 | 0 | 0 | 0 |
| YRI | PRR11 | 59145355 | 0 | 0 | 0 |
| YRI | PRR11 | 59150355 | 0 | 0 | 0 |
| YRI | PRR11 | 59155355 | 0 | 0 | 0 |
| YRI | PRR11 | 59160355 | 0 | 0 | 0 |
| YRI | PRR11 | 59165355 | 0 | 0 | 0 |
| YRI | PRR11 | 59170355 | 0 | 0 | 0 |
| YRI | PRR11 | 59175355 | 0 | 0 | 0 |
| YRI | PRR11 | 59180355 | 0 | 0 | 0 |
| YRI | PRR11 | 59185355 | 0 | 0 | 0 |
| YRI | PRR11 | 59190355 | 0 | 0 | 0 |
| YRI | PRR11 | 59195355 | 0 | 0 | 0 |
| YRI | PRR11 | 59200355 | 0 | 0 | 0 |
| YRI | PRR11 | 59205355 | 0 | 0 | 0 |
| YRI | PRR11 | 59210355 | 0 | 0 | 0 |
| YRI | PRR11 | 59215355 | 0 | 0 | 0 |
| YRI | PRR11 | 59220355 | 0 | 0 | 0 |
| YRI | PRR11 | 59225355 | 0 | 0 | 0 |
| YRI | PRR11 | 59230355 | 0 | 0 | 0 |



## 2\_TajimasD\_data

|     |       |          |   |   |   |
|-----|-------|----------|---|---|---|
| YRI | PRR11 | 59235355 | 0 | 0 | 0 |
| YRI | PRR11 | 59240355 | 0 | 0 | 0 |
| YRI | PRR11 | 59245355 | 0 | 0 | 0 |
| YRI | PRR11 | 59250355 | 0 | 0 | 0 |
| YRI | PRR11 | 59255355 | 0 | 0 | 0 |
| YRI | PRR11 | 59260355 | 0 | 0 | 0 |
| YRI | PRR11 | 59265355 | 0 | 0 | 0 |
| YRI | PRR11 | 59270355 | 0 | 0 | 0 |
| YRI | PRR11 | 59275355 | 0 | 0 | 0 |
| YRI | PRR11 | 59280355 | 0 | 0 | 0 |
| YRI | PRR11 | 59285355 | 0 | 0 | 0 |
| YRI | PRR11 | 59290355 | 0 | 0 | 0 |
| YRI | PRR11 | 59295355 | 0 | 0 | 0 |
| YRI | PRR11 | 59300355 | 0 | 0 | 0 |
| YRI | PRR11 | 59305355 | 0 | 0 | 0 |
| YRI | PRR11 | 59310355 | 0 | 0 | 0 |
| YRI | PRR11 | 59315355 | 0 | 0 | 0 |
| YRI | PRR11 | 59320355 | 0 | 0 | 0 |
| YRI | PRR11 | 59325355 | 0 | 0 | 0 |
| YRI | PRR11 | 59330355 | 0 | 0 | 0 |
| YRI | PRR11 | 59335355 | 0 | 0 | 0 |
| YRI | PRR11 | 59340355 | 0 | 0 | 0 |
| YRI | PRR11 | 59345355 | 0 | 0 | 0 |
| YRI | PRR11 | 59350355 | 0 | 0 | 0 |
| YRI | PRR11 | 59355355 | 0 | 0 | 0 |
| YRI | PRR11 | 59360355 | 0 | 0 | 0 |
| YRI | PRR11 | 59365355 | 0 | 0 | 0 |
| YRI | PRR11 | 59370355 | 0 | 0 | 0 |
| YRI | PRR11 | 59375355 | 0 | 0 | 0 |
| YRI | PRR11 | 59380355 | 0 | 0 | 0 |
| YRI | PRR11 | 59385355 | 0 | 0 | 0 |
| YRI | PRR11 | 59390355 | 0 | 0 | 0 |
| YRI | PRR11 | 59395355 | 0 | 0 | 0 |
| YRI | PRR11 | 59400355 | 0 | 0 | 0 |
| YRI | PRR11 | 59405355 | 0 | 0 | 0 |
| YRI | PRR11 | 59410355 | 0 | 0 | 0 |
| YRI | PRR11 | 59415355 | 0 | 0 | 0 |
| YRI | PRR11 | 59420355 | 0 | 0 | 0 |
| YRI | PRR11 | 59425355 | 0 | 0 | 0 |
| YRI | PRR11 | 59430355 | 0 | 0 | 0 |
| YRI | PRR11 | 59435355 | 0 | 0 | 0 |
| YRI | PRR11 | 59440355 | 0 | 0 | 0 |
| YRI | PRR11 | 59445355 | 0 | 0 | 0 |
| YRI | PRR11 | 59450355 | 0 | 0 | 0 |
| YRI | PRR11 | 59455355 | 0 | 0 | 0 |
| YRI | PRR11 | 59460355 | 0 | 0 | 0 |
| YRI | PRR11 | 59465355 | 0 | 0 | 0 |
| YRI | PRR11 | 59470355 | 0 | 0 | 0 |
| YRI | PRR11 | 59475355 | 0 | 0 | 0 |

## 2\_TajimasD\_data

|     |        |          |        |        |         |
|-----|--------|----------|--------|--------|---------|
| YRI | PRR11  | 59480355 | 0      | 0      | 0       |
| YRI | PRR11  | 59485355 | 0      | 0      | 0       |
| YRI | PRR11  | 59490355 | 0      | 0      | 0       |
| YRI | PRR11  | 59495355 | 0      | 0      | 0       |
| YRI | PRR11  | 59500355 | 0      | 0      | 0       |
| YRI | PRR11  | 59505355 | 0      | 0      | 0       |
| YRI | PRR11  | 59510355 | 0      | 0      | 0       |
| YRI | PRR11  | 59515355 | 0      | 0      | 0       |
| YRI | PRR11  | 59520355 | 0      | 0      | 0       |
| YRI | PRR11  | 59525355 | 0      | 0      | 0       |
| YRI | PRR11  | 59530355 | 0      | 0      | 0       |
| YRI | PRR11  | 59535355 | 0      | 0      | 0       |
| YRI | PRR11  | 59540355 | 0      | 0      | 0       |
| YRI | PRR11  | 59545355 | 0      | 0      | 0       |
| YRI | PRR11  | 59550355 | 0      | 0      | 0       |
| YRI | PRR11  | 59555355 | 0      | 0      | 0       |
| YRI | PRR11  | 59560355 | 0      | 0      | 0       |
| YRI | PRR11  | 59565355 | 0      | 0      | 0       |
| YRI | PRR11  | 59570355 | 0      | 0      | 0       |
| YRI | PRR11  | 59575355 | 0      | 0      | 0       |
| YRI | PRR11  | 59580355 | 0      | 0      | 0       |
| YRI | PRR11  | 59585355 | 0      | 0      | 0       |
| YRI | PRR11  | 59590355 | 0      | 0      | 0       |
| YRI | PRR11  | 59595355 | 0      | 0      | 0       |
| YRI | PRR11  | 59600355 | 0      | 0      | 0       |
| YRI | PRR11  | 59605355 | 0      | 0      | 0       |
| YRI | PRR11  | 59610355 | 0      | 0      | 0       |
| YRI | PRR11  | 59615355 | 0      | 0      | 0       |
| YRI | PRR11  | 59620355 | 0      | 0      | 0       |
| YRI | PRR11  | 59625355 | 0      | 0      | 0       |
| YRI | PRR11  | 59630355 | 0      | 0      | 0       |
| YRI | PRR11  | 59635355 | 0      | 0      | 0       |
| YRI | PRR11  | 59640355 | 0      | 0      | 0       |
| YRI | PRR11  | 59645355 | 0      | 0      | 0       |
| YRI | PRR11  | 59650355 | 0      | 0      | 0       |
| YRI | PRR11  | 59655355 | 0      | 0      | 0       |
| YRI | PRR11  | 59660355 | 0      | 0      | 0       |
| YRI | PRR11  | 59665355 | 0      | 0      | 0       |
| YRI | PRR11  | 59670355 | 0      | 0      | 0       |
| YRI | PRR11  | 59675355 | 0      | 0      | 0       |
| YRI | PRR11  | 59680355 | 0      | 0      | 0       |
| YRI | PRR11  | 59685355 | 0      | 0      | 0       |
| YRI | PRR11  | 59690355 | 0      | 0      | 0       |
| YRI | PRR11  | 59695355 | 0      | 0      | 0       |
| YRI | PRR11  | 59700355 | 0      | 0      | 0       |
| CEU | PRR20A | 56645918 | 6.8996 | 9.7221 | -0.8722 |
| CEU | PRR20A | 56650918 | 4.335  | 6.1402 | -0.8495 |
| CEU | PRR20A | 56655918 | 5.0979 | 6.1402 | -0.4905 |
| CEU | PRR20A | 56660918 | 9.5962 | 9.5515 | 0.014   |

## 2\_TajimasD\_data

|     |        |          |         |         |         |
|-----|--------|----------|---------|---------|---------|
| CEU | PRR20A | 56665918 | 12.6285 | 10.0632 | 0.7677  |
| CEU | PRR20A | 56670918 | 13.2766 | 10.5749 | 0.7719  |
| CEU | PRR20A | 56675918 | 12.3251 | 10.4043 | 0.5572  |
| CEU | PRR20A | 56680918 | 11.6135 | 8.3576  | 1.1574  |
| CEU | PRR20A | 56685918 | 12.3803 | 12.4511 | -0.0174 |
| CEU | PRR20A | 56690918 | 9.7652  | 14.4978 | -1.004  |
| CEU | PRR20A | 56695918 | 5.3859  | 8.6987  | -1.1349 |
| CEU | PRR20A | 56700918 | 3.7452  | 5.9697  | -1.0736 |
| CEU | PRR20A | 56705918 | 3.5788  | 5.6286  | -1.0427 |
| CEU | PRR20A | 56710918 | 3.6687  | 4.9463  | -0.7286 |
| CEU | PRR20A | 56715918 | 3.8159  | 6.4814  | -1.1947 |
| CEU | PRR20A | 56720918 | 3.7236  | 6.6519  | -1.2821 |
| CEU | PRR20A | 56725918 | 3.5692  | 5.2874  | -0.9239 |
| CEU | PRR20A | 56730918 | 4.0355  | 5.1169  | -0.5986 |
| CEU | PRR20A | 56735918 | 4.4871  | 3.9229  | 0.3935  |
| CEU | PRR20A | 56740918 | 3.0065  | 3.0701  | -0.0546 |
| CEU | PRR20A | 56745918 | 2.1186  | 4.4346  | -1.4531 |
| CEU | PRR20A | 56750918 | 3.0987  | 4.9463  | -1.0537 |
| CEU | PRR20A | 56755918 | 2.5296  | 4.2641  | -1.1259 |
| CEU | PRR20A | 56760918 | 3.6883  | 6.1402  | -1.1538 |
| CEU | PRR20A | 56765918 | 6.0041  | 7.6753  | -0.6424 |
| CEU | PRR20A | 56770918 | 6.0311  | 6.4814  | -0.2018 |
| CEU | PRR20A | 56775918 | 4.3632  | 5.458   | -0.5723 |
| CEU | PRR20A | 56780918 | 3.6541  | 6.1402  | -1.1699 |
| CEU | PRR20A | 56785918 | 4.2971  | 5.9697  | -0.8072 |
| CEU | PRR20A | 56790918 | 3.9056  | 4.9463  | -0.5935 |
| CEU | PRR20A | 56795918 | 5.7557  | 6.8225  | -0.4565 |
| CEU | PRR20A | 56800918 | 8.6819  | 9.5515  | -0.2732 |
| CEU | PRR20A | 56805918 | 8.2841  | 8.5281  | -0.0851 |
| CEU | PRR20A | 56810918 | 7.1565  | 6.9931  | 0.0684  |
| CEU | PRR20A | 56815918 | 6.1831  | 6.9931  | -0.3389 |
| CEU | PRR20A | 56820918 | 7.8985  | 7.8459  | 0.0198  |
| CEU | PRR20A | 56825918 | 7.1341  | 7.5047  | -0.1454 |
| CEU | PRR20A | 56830918 | 8.0989  | 7.3342  | 0.3064  |
| CEU | PRR20A | 56835918 | 11.6941 | 9.7221  | 0.6094  |
| CEU | PRR20A | 56840918 | 9.9647  | 9.3809  | 0.1865  |
| CEU | PRR20A | 56845918 | 7.7666  | 7.3342  | 0.1732  |
| CEU | PRR20A | 56850918 | 5.0674  | 7.8459  | -1.0467 |
| CEU | PRR20A | 56855918 | 4.7137  | 7.8459  | -1.1799 |
| CEU | PRR20A | 56860918 | 4.8965  | 5.458   | -0.2935 |
| CEU | PRR20A | 56865918 | 3.2843  | 5.458   | -1.1364 |
| CEU | PRR20A | 56870918 | 1.913   | 4.6052  | -1.6346 |
| CEU | PRR20A | 56875918 | 1.4098  | 3.9229  | -1.7528 |
| CEU | PRR20A | 56880918 | 2.8192  | 5.2874  | -1.3272 |
| CEU | PRR20A | 56885918 | 3.3816  | 4.9463  | -0.8923 |
| CEU | PRR20A | 56890918 | 3.1356  | 6.1402  | -1.4139 |
| CEU | PRR20A | 56895918 | 3.2612  | 7.5047  | -1.6649 |
| CEU | PRR20A | 56900918 | 3.067   | 5.6286  | -1.303  |
| CEU | PRR20A | 56905918 | 3.1186  | 4.2641  | -0.7436 |

## 2\_TajimasD\_data

|     |        |          |         |         |         |
|-----|--------|----------|---------|---------|---------|
| CEU | PRR20A | 56910918 | 2.8018  | 5.6286  | -1.4379 |
| CEU | PRR20A | 56915918 | 5.1643  | 10.4043 | -1.5201 |
| CEU | PRR20A | 56920918 | 6.4341  | 10.916  | -1.2431 |
| CEU | PRR20A | 56925918 | 4.7015  | 8.5281  | -1.3352 |
| CEU | PRR20A | 56930918 | 3.1995  | 7.1636  | -1.6227 |
| CEU | PRR20A | 56935918 | 2.5469  | 5.7991  | -1.6108 |
| CEU | PRR20A | 56940918 | 5.7574  | 7.8459  | -0.7868 |
| CEU | PRR20A | 56945918 | 7.0759  | 8.187   | -0.4025 |
| CEU | PRR20A | 56950918 | 6.9759  | 11.2571 | -1.1536 |
| CEU | PRR20A | 56955918 | 5.9899  | 10.916  | -1.3663 |
| CEU | PRR20A | 56960918 | 4.2566  | 6.6519  | -1.0487 |
| CEU | PRR20A | 56965918 | 4.9711  | 7.5047  | -0.9941 |
| CEU | PRR20A | 56970918 | 4.6411  | 8.0164  | -1.2467 |
| CEU | PRR20A | 56975918 | 5.5335  | 8.0164  | -0.9171 |
| CEU | PRR20A | 56980918 | 4.7681  | 6.6519  | -0.8248 |
| CEU | PRR20A | 56985918 | 4.8291  | 6.6519  | -0.7981 |
| CEU | PRR20A | 56990918 | 7.8027  | 8.3576  | -0.1973 |
| CEU | PRR20A | 56995918 | 6.9664  | 7.6753  | -0.2725 |
| CEU | PRR20A | 57000918 | 4.8497  | 5.9697  | -0.5405 |
| CEU | PRR20A | 57005918 | 5.2484  | 5.9697  | -0.3481 |
| CEU | PRR20A | 57010918 | 6.1837  | 6.4814  | -0.1334 |
| CEU | PRR20A | 57015918 | 9.2488  | 8.5281  | 0.2515  |
| CEU | PRR20A | 57020918 | 8.9126  | 8.187   | 0.2629  |
| CEU | PRR20A | 57025918 | 8.6188  | 8.187   | 0.1564  |
| CEU | PRR20A | 57030918 | 13.0429 | 10.2337 | 0.8276  |
| CEU | PRR20A | 57035918 | 16.4968 | 10.4043 | 1.7674  |
| CEU | PRR20A | 57040918 | 13.6096 | 9.5515  | 1.2749  |
| CEU | PRR20A | 57045918 | 7.0161  | 6.9931  | 0.0096  |
| CEU | PRR20A | 57050918 | 9.9272  | 8.187   | 0.6304  |
| CEU | PRR20A | 57055918 | 12.7419 | 9.3809  | 1.0737  |
| CEU | PRR20A | 57060918 | 8.8592  | 7.3342  | 0.611   |
| CEU | PRR20A | 57065918 | 7.5442  | 6.8225  | 0.3088  |
| CEU | PRR20A | 57070918 | 9.937   | 7.8459  | 0.7877  |
| CEU | PRR20A | 57075918 | 11.265  | 9.5515  | 0.5383  |
| CEU | PRR20A | 57080918 | 12.6538 | 10.2337 | 0.713   |
| CEU | PRR20A | 57085918 | 13.1129 | 9.2104  | 1.2681  |
| CEU | PRR20A | 57090918 | 12.4788 | 9.0398  | 1.137   |
| CEU | PRR20A | 57095918 | 13.567  | 9.5515  | 1.2615  |
| CEU | PRR20A | 57100918 | 14.1744 | 9.2104  | 1.613   |
| CEU | PRR20A | 57105918 | 14.7497 | 8.6987  | 2.073   |
| CEU | PRR20A | 57110918 | 12.3958 | 9.2104  | 1.0351  |
| CEU | PRR20A | 57115918 | 7.5646  | 8.5281  | -0.3362 |
| CEU | PRR20A | 57120918 | 5.2692  | 6.8225  | -0.6647 |
| CEU | PRR20A | 57125918 | 5.8487  | 7.5047  | -0.6497 |
| CEU | PRR20A | 57130918 | 5.7879  | 6.6519  | -0.3783 |
| CEU | PRR20A | 57135918 | 4.5617  | 4.9463  | -0.2193 |
| CEU | PRR20A | 57140918 | 4.1528  | 5.2874  | -0.6101 |
| CEU | PRR20A | 57145918 | 3.6757  | 5.7991  | -1.0517 |
| CEU | PRR20A | 57150918 | 4.2894  | 7.6753  | -1.3014 |

## 2\_TajimasD\_data

|     |        |          |        |        |         |
|-----|--------|----------|--------|--------|---------|
| CEU | PRR20A | 57155918 | 5.2991 | 7.3342 | -0.8154 |
| CEU | PRR20A | 57160918 | 5.2665 | 5.7991 | -0.2638 |
| CEU | PRR20A | 57165918 | 5.0423 | 5.9697 | -0.4476 |
| CEU | PRR20A | 57170918 | 6.1418 | 6.8225 | -0.2913 |
| CEU | PRR20A | 57175918 | 5.9703 | 7.5047 | -0.602  |
| CEU | PRR20A | 57180918 | 6.3024 | 8.5281 | -0.7766 |
| CEU | PRR20A | 57185918 | 5.0301 | 7.6753 | -1.0167 |
| CEU | PRR20A | 57190918 | 3.2597 | 6.4814 | -1.444  |
| CEU | PRR20A | 57195918 | 3.7518 | 6.3108 | -1.1749 |
| CEU | PRR20A | 57200918 | 4.0367 | 6.8225 | -1.192  |
| CEU | PRR20A | 57205918 | 6.2542 | 7.8459 | -0.5996 |
| CEU | PRR20A | 57210918 | 6.5345 | 6.8225 | -0.1232 |
| CEU | PRR20A | 57215918 | 4.7085 | 6.1402 | -0.6737 |
| CEU | PRR20A | 57220918 | 3.4121 | 5.1169 | -0.9436 |
| CEU | PRR20A | 57225918 | 3.2944 | 4.9463 | -0.9421 |
| CEU | PRR20A | 57230918 | 2.422  | 5.9697 | -1.7122 |
| CEU | PRR20A | 57235918 | 2.0625 | 5.6286 | -1.8139 |
| CEU | PRR20A | 57240918 | 3.8375 | 5.9697 | -1.029  |
| CEU | PRR20A | 57245918 | 4.2976 | 5.9697 | -0.807  |
| CEU | PRR20A | 57250918 | 4.4329 | 5.458  | -0.5359 |
| CEU | PRR20A | 57255918 | 3.5834 | 4.9463 | -0.7773 |
| CEU | PRR20A | 57260918 | 2.6691 | 4.6052 | -1.1755 |
| CEU | PRR20A | 57265918 | 4.4249 | 5.7991 | -0.6806 |
| CEU | PRR20A | 57270918 | 5.403  | 6.4814 | -0.4834 |
| CEU | PRR20A | 57275918 | 4.6918 | 8.187  | -1.2662 |
| CEU | PRR20A | 57280918 | 4.4138 | 7.8459 | -1.2929 |
| CEU | PRR20A | 57285918 | 3.1529 | 4.2641 | -0.7213 |
| CEU | PRR20A | 57290918 | 1.3929 | 3.7524 | -1.7094 |
| CEU | PRR20A | 57295918 | 3.3944 | 5.9697 | -1.2429 |
| CEU | PRR20A | 57300918 | 3.12   | 6.4814 | -1.5066 |
| CEU | PRR20A | 57305918 | 2.3737 | 6.1402 | -1.7724 |
| CEU | PRR20A | 57310918 | 4.202  | 6.6519 | -1.0726 |
| CEU | PRR20A | 57315918 | 5.3979 | 6.4814 | -0.4856 |
| CEU | PRR20A | 57320918 | 5.8085 | 6.1402 | -0.1561 |
| CEU | PRR20A | 57325918 | 5.1245 | 6.4814 | -0.6082 |
| CEU | PRR20A | 57330918 | 5.6529 | 8.0164 | -0.873  |
| CEU | PRR20A | 57335918 | 4.8629 | 7.6753 | -1.081  |
| CEU | PRR20A | 57340918 | 5.0957 | 6.1402 | -0.4915 |
| CEU | PRR20A | 57345918 | 5.925  | 6.1402 | -0.1013 |
| CEU | PRR20A | 57350918 | 6.3352 | 6.3108 | 0.0112  |
| CEU | PRR20A | 57355918 | 7.6926 | 6.6519 | 0.4556  |
| CEU | PRR20A | 57360918 | 5.8877 | 6.9931 | -0.4625 |
| CEU | PRR20A | 57365918 | 2.6817 | 5.458  | -1.4514 |
| CEU | PRR20A | 57370918 | 2.5248 | 5.2874 | -1.4855 |
| CEU | PRR20A | 57375918 | 4.2004 | 6.3108 | -0.9689 |
| CEU | PRR20A | 57380918 | 3.9336 | 5.6286 | -0.8622 |
| CEU | PRR20A | 57385918 | 3.3086 | 6.6519 | -1.4638 |
| CEU | PRR20A | 57390918 | 3.8386 | 7.1636 | -1.3611 |
| CEU | PRR20A | 57395918 | 6.2632 | 7.1636 | -0.3686 |

## 2\_TajimasD\_data

|     |        |          |         |         |         |
|-----|--------|----------|---------|---------|---------|
| CEU | PRR20A | 57400918 | 7.0381  | 7.8459  | -0.3043 |
| CEU | PRR20A | 57405918 | 5.7231  | 7.3342  | -0.6455 |
| CEU | PRR20A | 57410918 | 7.1921  | 6.4814  | 0.3185  |
| CEU | PRR20A | 57415918 | 6.1194  | 5.1169  | 0.5549  |
| CEU | PRR20A | 57420918 | 2.8355  | 4.0935  | -0.8459 |
| CEU | PRR20A | 57425918 | 4.5387  | 5.9697  | -0.6906 |
| CEU | PRR20A | 57430918 | 5.3618  | 6.4814  | -0.5018 |
| CEU | PRR20A | 57435918 | 4.4696  | 5.1169  | -0.3583 |
| CEU | PRR20A | 57440918 | 4.4914  | 5.7991  | -0.6477 |
| CEU | PRR20A | 57445918 | 6.1991  | 6.8225  | -0.2668 |
| CEU | PRR20A | 57450918 | 7.7186  | 7.3342  | 0.154   |
| CEU | PRR20A | 57455918 | 5.0779  | 7.1636  | -0.8538 |
| CEU | PRR20A | 57460918 | 4.7588  | 6.3108  | -0.7126 |
| CEU | PRR20A | 57465918 | 5.7208  | 4.7757  | 0.5559  |
| CEU | PRR20A | 57470918 | 5.7358  | 4.9463  | 0.4503  |
| CEU | PRR20A | 57475918 | 4.1352  | 6.6519  | -1.1019 |
| CEU | PRR20A | 57480918 | 3.4292  | 6.3108  | -1.323  |
| CEU | PRR20A | 57485918 | 5.3496  | 5.2874  | 0.0334  |
| CEU | PRR20A | 57490918 | 5.2985  | 5.7991  | -0.2479 |
| CEU | PRR20A | 57495918 | 3.1688  | 5.458   | -1.1967 |
| CEU | PRR20A | 57500918 | 2.6211  | 5.2874  | -1.4337 |
| CEU | PRR20A | 57505918 | 5.7669  | 7.3342  | -0.628  |
| CEU | PRR20A | 57510918 | 6.0744  | 6.6519  | -0.2528 |
| CEU | PRR20A | 57515918 | 3.6151  | 5.7991  | -1.0817 |
| CEU | PRR20A | 57520918 | 3.9598  | 5.7991  | -0.911  |
| CEU | PRR20A | 57525918 | 4.0241  | 5.2874  | -0.6793 |
| CEU | PRR20A | 57530918 | 2.0484  | 3.7524  | -1.2345 |
| CEU | PRR20A | 57535918 | 2.5026  | 3.5818  | -0.8134 |
| CEU | PRR20A | 57540918 | 2.4844  | 4.0935  | -1.082  |
| CEU | PRR20A | 57545918 | 1.0109  | 3.0701  | -1.7664 |
| CEU | PRR20A | 57550918 | 4.6151  | 6.3108  | -0.7785 |
| CEU | PRR20A | 57555918 | 15.5878 | 11.9394 | 0.9302  |
| CEU | PRR20A | 57560918 | 18.1669 | 11.9394 | 1.5877  |
| CEU | PRR20A | 57565918 | 15.5051 | 11.5982 | 1.0236  |
| CEU | PRR20A | 57570918 | 16.952  | 12.7922 | 0.9937  |
| CEU | PRR20A | 57575918 | 13.9878 | 11.0866 | 0.793   |
| CEU | PRR20A | 57580918 | 14.7877 | 11.0866 | 1.0117  |
| CEU | PRR20A | 57585918 | 15.812  | 10.0632 | 1.7204  |
| CEU | PRR20A | 57590918 | 13.1132 | 8.6987  | 1.5124  |
| CEU | PRR20A | 57595918 | 13.6939 | 9.3809  | 1.3778  |
| CEU | PRR20A | 57600918 | 17.2886 | 10.5749 | 1.9182  |
| CEU | PRR20A | 57605918 | 16.0044 | 9.3809  | 2.116   |
| CEU | PRR20A | 57610918 | 12.4134 | 7.8459  | 1.7206  |
| CEU | PRR20A | 57615918 | 12.2653 | 9.2104  | 0.9927  |
| CEU | PRR20A | 57620918 | 9.9253  | 8.5281  | 0.4875  |
| CEU | PRR20A | 57625918 | 6.3151  | 6.8225  | -0.2171 |
| CEU | PRR20A | 57630918 | 7.6046  | 7.1636  | 0.1805  |
| CEU | PRR20A | 57635918 | 11.9588 | 9.0398  | 0.9651  |
| CHB | PRR20A | 56645918 | 8.9012  | 9.1484  | -0.0806 |

## 2\_TajimasD\_data

|     |        |          |         |         |         |
|-----|--------|----------|---------|---------|---------|
| CHB | PRR20A | 56650918 | 5.103   | 7.6237  | -0.9721 |
| CHB | PRR20A | 56655918 | 5.4097  | 6.7766  | -0.5868 |
| CHB | PRR20A | 56660918 | 9.7017  | 9.4872  | 0.0676  |
| CHB | PRR20A | 56665918 | 12.6278 | 9.9955  | 0.7904  |
| CHB | PRR20A | 56670918 | 12.9718 | 10.3343 | 0.7677  |
| CHB | PRR20A | 56675918 | 11.6591 | 10.3343 | 0.3856  |
| CHB | PRR20A | 56680918 | 10.7411 | 8.8096  | 0.6521  |
| CHB | PRR20A | 56685918 | 13.4043 | 14.9085 | -0.3099 |
| CHB | PRR20A | 56690918 | 11.1957 | 17.1109 | -1.0682 |
| CHB | PRR20A | 56695918 | 4.7628  | 9.9955  | -1.5713 |
| CHB | PRR20A | 56700918 | 3.4114  | 6.2684  | -1.3158 |
| CHB | PRR20A | 56705918 | 4.5665  | 7.9625  | -1.2585 |
| CHB | PRR20A | 56710918 | 4.348   | 8.979   | -1.5362 |
| CHB | PRR20A | 56715918 | 4.1439  | 9.1484  | -1.6317 |
| CHB | PRR20A | 56720918 | 4.8053  | 10.6731 | -1.6573 |
| CHB | PRR20A | 56725918 | 3.8281  | 8.8096  | -1.6819 |
| CHB | PRR20A | 56730918 | 3.6922  | 9.6567  | -1.8495 |
| CHB | PRR20A | 56735918 | 4.8498  | 11.5202 | -1.7538 |
| CHB | PRR20A | 56740918 | 3.7251  | 9.9955  | -1.8829 |
| CHB | PRR20A | 56745918 | 2.7759  | 9.3178  | -2.0969 |
| CHB | PRR20A | 56750918 | 3.4653  | 8.8096  | -1.8044 |
| CHB | PRR20A | 56755918 | 3.6465  | 7.6237  | -1.5337 |
| CHB | PRR20A | 56760918 | 3.2956  | 7.2848  | -1.6035 |
| CHB | PRR20A | 56765918 | 4.1966  | 7.9625  | -1.3955 |
| CHB | PRR20A | 56770918 | 4.4234  | 8.8096  | -1.4809 |
| CHB | PRR20A | 56775918 | 2.9989  | 9.6567  | -2.0644 |
| CHB | PRR20A | 56780918 | 3.0386  | 8.4708  | -1.9017 |
| CHB | PRR20A | 56785918 | 3.7238  | 7.7931  | -1.538  |
| CHB | PRR20A | 56790918 | 3.2262  | 8.1319  | -1.7831 |
| CHB | PRR20A | 56795918 | 3.8386  | 8.6402  | -1.6505 |
| CHB | PRR20A | 56800918 | 6.7849  | 10.3343 | -1.0332 |
| CHB | PRR20A | 56805918 | 7.5684  | 9.3178  | -0.5607 |
| CHB | PRR20A | 56810918 | 5.9619  | 7.9625  | -0.7414 |
| CHB | PRR20A | 56815918 | 4.5747  | 8.6402  | -1.3975 |
| CHB | PRR20A | 56820918 | 6.8483  | 9.8261  | -0.9085 |
| CHB | PRR20A | 56825918 | 7.1323  | 9.4872  | -0.7423 |
| CHB | PRR20A | 56830918 | 7.9033  | 8.8096  | -0.306  |
| CHB | PRR20A | 56835918 | 9.2737  | 8.6402  | 0.2178  |
| CHB | PRR20A | 56840918 | 8.553   | 8.979   | -0.1413 |
| CHB | PRR20A | 56845918 | 7.8968  | 9.3178  | -0.4555 |
| CHB | PRR20A | 56850918 | 5.9695  | 8.1319  | -0.786  |
| CHB | PRR20A | 56855918 | 5.2313  | 6.4378  | -0.5425 |
| CHB | PRR20A | 56860918 | 4.8565  | 6.6072  | -0.7689 |
| CHB | PRR20A | 56865918 | 4.2646  | 6.946   | -1.1255 |
| CHB | PRR20A | 56870918 | 2.3166  | 5.0825  | -1.5356 |
| CHB | PRR20A | 56875918 | 1.7927  | 4.5742  | -1.6937 |
| CHB | PRR20A | 56880918 | 2.9832  | 5.4213  | -1.2785 |
| CHB | PRR20A | 56885918 | 2.7028  | 4.913   | -1.2642 |
| CHB | PRR20A | 56890918 | 1.7487  | 5.7601  | -1.993  |

## 2\_TajimasD\_data

|     |        |          |         |        |         |
|-----|--------|----------|---------|--------|---------|
| CHB | PRR20A | 56895918 | 3.1719  | 7.6237 | -1.7167 |
| CHB | PRR20A | 56900918 | 3.6014  | 6.0989 | -1.1789 |
| CHB | PRR20A | 56905918 | 2.995   | 5.0825 | -1.1589 |
| CHB | PRR20A | 56910918 | 3.7597  | 6.6072 | -1.2507 |
| CHB | PRR20A | 56915918 | 5.3404  | 7.7931 | -0.927  |
| CHB | PRR20A | 56920918 | 5.0413  | 7.1154 | -0.8518 |
| CHB | PRR20A | 56925918 | 3.1342  | 5.2519 | -1.1421 |
| CHB | PRR20A | 56930918 | 1.9357  | 4.4048 | -1.5537 |
| CHB | PRR20A | 56935918 | 2.3027  | 5.0825 | -1.5433 |
| CHB | PRR20A | 56940918 | 5.3429  | 6.2684 | -0.4263 |
| CHB | PRR20A | 56945918 | 5.7103  | 7.1154 | -0.577  |
| CHB | PRR20A | 56950918 | 4.1894  | 8.3013 | -1.4665 |
| CHB | PRR20A | 56955918 | 3.4818  | 7.6237 | -1.5972 |
| CHB | PRR20A | 56960918 | 3.4179  | 6.4378 | -1.3578 |
| CHB | PRR20A | 56965918 | 4.9339  | 6.946  | -0.8446 |
| CHB | PRR20A | 56970918 | 4.2376  | 6.4378 | -0.9893 |
| CHB | PRR20A | 56975918 | 4.38    | 5.7601 | -0.6857 |
| CHB | PRR20A | 56980918 | 4.1089  | 5.2519 | -0.6165 |
| CHB | PRR20A | 56985918 | 3.8089  | 6.7766 | -1.2739 |
| CHB | PRR20A | 56990918 | 5.9421  | 8.4708 | -0.8852 |
| CHB | PRR20A | 56995918 | 5.9638  | 7.7931 | -0.6914 |
| CHB | PRR20A | 57000918 | 4.5481  | 5.5907 | -0.532  |
| CHB | PRR20A | 57005918 | 4.1578  | 4.913  | -0.432  |
| CHB | PRR20A | 57010918 | 5.3975  | 7.1154 | -0.7055 |
| CHB | PRR20A | 57015918 | 7.7011  | 8.979  | -0.4239 |
| CHB | PRR20A | 57020918 | 7.0198  | 9.1484 | -0.694  |
| CHB | PRR20A | 57025918 | 7.0053  | 7.9625 | -0.3547 |
| CHB | PRR20A | 57030918 | 10.3411 | 9.4872 | 0.2692  |
| CHB | PRR20A | 57035918 | 12.9852 | 9.9955 | 0.8978  |
| CHB | PRR20A | 57040918 | 10.8582 | 8.979  | 0.6234  |
| CHB | PRR20A | 57045918 | 5.264   | 7.2848 | -0.8123 |
| CHB | PRR20A | 57050918 | 7.4555  | 6.7766 | 0.2914  |
| CHB | PRR20A | 57055918 | 10.197  | 8.6402 | 0.5351  |
| CHB | PRR20A | 57060918 | 7.1454  | 7.7931 | -0.2448 |
| CHB | PRR20A | 57065918 | 6.2279  | 6.6072 | -0.1666 |
| CHB | PRR20A | 57070918 | 7.953   | 7.1154 | 0.344   |
| CHB | PRR20A | 57075918 | 8.8664  | 7.4543 | 0.5558  |
| CHB | PRR20A | 57080918 | 9.9579  | 7.9625 | 0.7394  |
| CHB | PRR20A | 57085918 | 10.5568 | 8.3013 | 0.8044  |
| CHB | PRR20A | 57090918 | 9.4872  | 7.9625 | 0.565   |
| CHB | PRR20A | 57095918 | 10.0697 | 8.3013 | 0.6307  |
| CHB | PRR20A | 57100918 | 11.3366 | 8.4708 | 1.0032  |
| CHB | PRR20A | 57105918 | 11.5052 | 8.4708 | 1.0623  |
| CHB | PRR20A | 57110918 | 9.8769  | 7.9625 | 0.7094  |
| CHB | PRR20A | 57115918 | 7.042   | 6.4378 | 0.2717  |
| CHB | PRR20A | 57120918 | 4.652   | 4.913  | -0.1493 |
| CHB | PRR20A | 57125918 | 4.8389  | 4.7436 | 0.0562  |
| CHB | PRR20A | 57130918 | 5.4911  | 5.4213 | 0.0366  |
| CHB | PRR20A | 57135918 | 4.2488  | 5.2519 | -0.541  |



## 2\_TajimasD\_data

|     |        |          |        |        |         |
|-----|--------|----------|--------|--------|---------|
| CHB | PRR20A | 57140918 | 3.7816 | 5.5907 | -0.923  |
| CHB | PRR20A | 57145918 | 3.5195 | 5.9295 | -1.1667 |
| CHB | PRR20A | 57150918 | 4.0297 | 6.6072 | -1.1321 |
| CHB | PRR20A | 57155918 | 4.3354 | 6.2684 | -0.8903 |
| CHB | PRR20A | 57160918 | 4.2785 | 5.5907 | -0.6695 |
| CHB | PRR20A | 57165918 | 4.9121 | 6.4378 | -0.686  |
| CHB | PRR20A | 57170918 | 5.7561 | 6.4378 | -0.3065 |
| CHB | PRR20A | 57175918 | 5.0748 | 5.5907 | -0.2632 |
| CHB | PRR20A | 57180918 | 5.4702 | 5.2519 | 0.1177  |
| CHB | PRR20A | 57185918 | 4.4489 | 5.0825 | -0.3518 |
| CHB | PRR20A | 57190918 | 3.0227 | 4.5742 | -0.9447 |
| CHB | PRR20A | 57195918 | 4.0152 | 6.4378 | -1.0893 |
| CHB | PRR20A | 57200918 | 4.3187 | 6.7766 | -1.0551 |
| CHB | PRR20A | 57205918 | 5.5761 | 6.6072 | -0.4529 |
| CHB | PRR20A | 57210918 | 6.0758 | 7.1154 | -0.4269 |
| CHB | PRR20A | 57215918 | 4.8011 | 5.4213 | -0.3252 |
| CHB | PRR20A | 57220918 | 3.368  | 4.7436 | -0.8114 |
| CHB | PRR20A | 57225918 | 3.7797 | 5.9295 | -1.0407 |
| CHB | PRR20A | 57230918 | 3.2018 | 6.2684 | -1.4124 |
| CHB | PRR20A | 57235918 | 1.9497 | 4.4048 | -1.5449 |
| CHB | PRR20A | 57240918 | 2.9796 | 4.4048 | -0.8968 |
| CHB | PRR20A | 57245918 | 4.0139 | 5.0825 | -0.5933 |
| CHB | PRR20A | 57250918 | 4.3227 | 5.9295 | -0.7779 |
| CHB | PRR20A | 57255918 | 3.4529 | 6.0989 | -1.249  |
| CHB | PRR20A | 57260918 | 2.5047 | 4.5742 | -1.2602 |
| CHB | PRR20A | 57265918 | 3.881  | 6.2684 | -1.0996 |
| CHB | PRR20A | 57270918 | 4.8256 | 7.1154 | -0.9404 |
| CHB | PRR20A | 57275918 | 5.016  | 7.1154 | -0.8622 |
| CHB | PRR20A | 57280918 | 5.0879 | 7.1154 | -0.8326 |
| CHB | PRR20A | 57285918 | 3.1018 | 4.913  | -1.036  |
| CHB | PRR20A | 57290918 | 1.151  | 3.0495 | -1.6327 |
| CHB | PRR20A | 57295918 | 3.4587 | 4.2354 | -0.5056 |
| CHB | PRR20A | 57300918 | 3.2084 | 5.2519 | -1.1021 |
| CHB | PRR20A | 57305918 | 2.143  | 4.5742 | -1.4804 |
| CHB | PRR20A | 57310918 | 3.8561 | 5.4213 | -0.8207 |
| CHB | PRR20A | 57315918 | 5.3251 | 5.9295 | -0.2926 |
| CHB | PRR20A | 57320918 | 5.758  | 5.9295 | -0.083  |
| CHB | PRR20A | 57325918 | 5.2642 | 6.2684 | -0.4625 |
| CHB | PRR20A | 57330918 | 6.2498 | 6.6072 | -0.157  |
| CHB | PRR20A | 57335918 | 5.2541 | 7.4543 | -0.8661 |
| CHB | PRR20A | 57340918 | 4.9275 | 7.7931 | -1.083  |
| CHB | PRR20A | 57345918 | 6.2208 | 6.6072 | -0.1697 |
| CHB | PRR20A | 57350918 | 7.2817 | 6.4378 | 0.3794  |
| CHB | PRR20A | 57355918 | 8.3849 | 7.1154 | 0.5213  |
| CHB | PRR20A | 57360918 | 6.4358 | 5.7601 | 0.3357  |
| CHB | PRR20A | 57365918 | 3.3842 | 5.0825 | -0.9429 |
| CHB | PRR20A | 57370918 | 2.9713 | 6.4378 | -1.5587 |
| CHB | PRR20A | 57375918 | 4.3286 | 6.4378 | -0.9484 |
| CHB | PRR20A | 57380918 | 3.8736 | 4.913  | -0.5945 |

## 2\_TajimasD\_data

|     |        |          |         |         |         |
|-----|--------|----------|---------|---------|---------|
| CHB | PRR20A | 57385918 | 2.2663  | 4.2354  | -1.2819 |
| CHB | PRR20A | 57390918 | 3.8797  | 6.0989  | -1.0476 |
| CHB | PRR20A | 57395918 | 7.5852  | 8.979   | -0.4624 |
| CHB | PRR20A | 57400918 | 7.4891  | 8.6402  | -0.3957 |
| CHB | PRR20A | 57405918 | 5.653   | 7.1154  | -0.6006 |
| CHB | PRR20A | 57410918 | 6.7784  | 7.4543  | -0.2661 |
| CHB | PRR20A | 57415918 | 6.0788  | 6.7766  | -0.2995 |
| CHB | PRR20A | 57420918 | 3.2619  | 5.2519  | -1.0733 |
| CHB | PRR20A | 57425918 | 4.6019  | 6.0989  | -0.7066 |
| CHB | PRR20A | 57430918 | 5.6097  | 7.1154  | -0.6183 |
| CHB | PRR20A | 57435918 | 4.4624  | 6.0989  | -0.7725 |
| CHB | PRR20A | 57440918 | 4.4828  | 5.4213  | -0.4921 |
| CHB | PRR20A | 57445918 | 5.9147  | 6.2684  | -0.1629 |
| CHB | PRR20A | 57450918 | 7.0442  | 6.7766  | 0.1149  |
| CHB | PRR20A | 57455918 | 4.9796  | 6.6072  | -0.7149 |
| CHB | PRR20A | 57460918 | 4.5551  | 7.1154  | -1.0514 |
| CHB | PRR20A | 57465918 | 5.5089  | 6.6072  | -0.4824 |
| CHB | PRR20A | 57470918 | 5.9909  | 7.9625  | -0.7306 |
| CHB | PRR20A | 57475918 | 4.3149  | 7.1154  | -1.1501 |
| CHB | PRR20A | 57480918 | 3.2401  | 4.913   | -0.9569 |
| CHB | PRR20A | 57485918 | 5.2062  | 5.9295  | -0.3502 |
| CHB | PRR20A | 57490918 | 5.2707  | 6.0989  | -0.3909 |
| CHB | PRR20A | 57495918 | 3.5043  | 5.0825  | -0.8762 |
| CHB | PRR20A | 57500918 | 3.4805  | 5.4213  | -1.0177 |
| CHB | PRR20A | 57505918 | 5.7679  | 6.946   | -0.4945 |
| CHB | PRR20A | 57510918 | 5.653   | 5.9295  | -0.1339 |
| CHB | PRR20A | 57515918 | 4.2484  | 5.9295  | -0.8138 |
| CHB | PRR20A | 57520918 | 4.8291  | 6.7766  | -0.836  |
| CHB | PRR20A | 57525918 | 4.391   | 6.4378  | -0.9203 |
| CHB | PRR20A | 57530918 | 2.5553  | 7.7931  | -1.9796 |
| CHB | PRR20A | 57535918 | 2.7759  | 8.4708  | -1.9936 |
| CHB | PRR20A | 57540918 | 2.6176  | 8.1319  | -2.0043 |
| CHB | PRR20A | 57545918 | 1.6396  | 8.8096  | -2.4208 |
| CHB | PRR20A | 57550918 | 4.545   | 8.8096  | -1.4398 |
| CHB | PRR20A | 57555918 | 13.877  | 11.8591 | 0.5163  |
| CHB | PRR20A | 57560918 | 17.8153 | 13.045  | 1.1155  |
| CHB | PRR20A | 57565918 | 17.0217 | 11.8591 | 1.3208  |
| CHB | PRR20A | 57570918 | 18.3168 | 12.7061 | 1.345   |
| CHB | PRR20A | 57575918 | 15.0287 | 10.1649 | 1.4378  |
| CHB | PRR20A | 57580918 | 16.2231 | 9.8261  | 1.9517  |
| CHB | PRR20A | 57585918 | 17.4502 | 11.8591 | 1.4304  |
| CHB | PRR20A | 57590918 | 13.308  | 10.6731 | 0.7442  |
| CHB | PRR20A | 57595918 | 12.7908 | 9.9955  | 0.8394  |
| CHB | PRR20A | 57600918 | 16.696  | 11.8591 | 1.2375  |
| CHB | PRR20A | 57605918 | 15.6889 | 11.5202 | 1.096   |
| CHB | PRR20A | 57610918 | 12.3847 | 9.3178  | 0.9831  |
| CHB | PRR20A | 57615918 | 13.3893 | 9.1484  | 1.3827  |
| CHB | PRR20A | 57620918 | 10.0805 | 7.4543  | 1.0337  |
| CHB | PRR20A | 57625918 | 6.5612  | 6.0989  | 0.2182  |

## 2\_TajimasD\_data

|     |        |          |         |         |         |
|-----|--------|----------|---------|---------|---------|
| CHB | PRR20A | 57630918 | 8.1984  | 6.7766  | 0.6103  |
| CHB | PRR20A | 57635918 | 10.5188 | 8.1319  | 0.8676  |
| YRI | PRR20A | 56645918 | 9.9338  | 12.9408 | -0.7061 |
| YRI | PRR20A | 56650918 | 6.7402  | 9.7476  | -0.9213 |
| YRI | PRR20A | 56655918 | 8.1828  | 9.2434  | -0.3413 |
| YRI | PRR20A | 56660918 | 12.8095 | 12.6047 | 0.0493  |
| YRI | PRR20A | 56665918 | 15.7515 | 15.2937 | 0.0917  |
| YRI | PRR20A | 56670918 | 16.2216 | 16.9743 | -0.1365 |
| YRI | PRR20A | 56675918 | 14.3647 | 14.4534 | -0.0188 |
| YRI | PRR20A | 56680918 | 13.7426 | 12.7727 | 0.2306  |
| YRI | PRR20A | 56685918 | 24.1808 | 22.0162 | 0.3057  |
| YRI | PRR20A | 56690918 | 20.9046 | 22.1842 | -0.1794 |
| YRI | PRR20A | 56695918 | 9.1667  | 13.445  | -0.9689 |
| YRI | PRR20A | 56700918 | 8.5891  | 11.0921 | -0.6796 |
| YRI | PRR20A | 56705918 | 13.3453 | 13.1089 | 0.0548  |
| YRI | PRR20A | 56710918 | 17.2114 | 14.6214 | 0.5417  |
| YRI | PRR20A | 56715918 | 14.2701 | 14.1172 | 0.0331  |
| YRI | PRR20A | 56720918 | 11.3128 | 12.9408 | -0.3823 |
| YRI | PRR20A | 56725918 | 11.9107 | 11.7644 | 0.0376  |
| YRI | PRR20A | 56730918 | 16.6282 | 13.9492 | 0.5859  |
| YRI | PRR20A | 56735918 | 16.2497 | 15.2937 | 0.1916  |
| YRI | PRR20A | 56740918 | 10.2712 | 12.2685 | -0.4932 |
| YRI | PRR20A | 56745918 | 9.1329  | 11.2602 | -0.5695 |
| YRI | PRR20A | 56750918 | 10.4525 | 11.0921 | -0.1737 |
| YRI | PRR20A | 56755918 | 9.3891  | 10.5879 | -0.34   |
| YRI | PRR20A | 56760918 | 9.1357  | 13.613  | -1.0021 |
| YRI | PRR20A | 56765918 | 10.5109 | 14.1172 | -0.7798 |
| YRI | PRR20A | 56770918 | 12.0276 | 13.1089 | -0.2508 |
| YRI | PRR20A | 56775918 | 14.0673 | 13.2769 | 0.1811  |
| YRI | PRR20A | 56780918 | 12.7364 | 12.1005 | 0.1591  |
| YRI | PRR20A | 56785918 | 10.9097 | 11.7644 | -0.2196 |
| YRI | PRR20A | 56790918 | 11.5998 | 12.2685 | -0.1651 |
| YRI | PRR20A | 56795918 | 9.9742  | 11.5963 | -0.4224 |
| YRI | PRR20A | 56800918 | 10.2695 | 12.2685 | -0.4936 |
| YRI | PRR20A | 56805918 | 9.1264  | 11.0921 | -0.5337 |
| YRI | PRR20A | 56810918 | 8.9619  | 8.7392  | 0.0755  |
| YRI | PRR20A | 56815918 | 9.8691  | 8.5712  | 0.4479  |
| YRI | PRR20A | 56820918 | 11.7735 | 12.1005 | -0.0818 |
| YRI | PRR20A | 56825918 | 10.8699 | 12.6047 | -0.4176 |
| YRI | PRR20A | 56830918 | 11.0269 | 11.0921 | -0.0177 |
| YRI | PRR20A | 56835918 | 12.8231 | 10.924  | 0.523   |
| YRI | PRR20A | 56840918 | 12.3012 | 11.4282 | 0.2305  |
| YRI | PRR20A | 56845918 | 11.0205 | 11.9324 | -0.2312 |
| YRI | PRR20A | 56850918 | 8.1286  | 10.4199 | -0.6596 |
| YRI | PRR20A | 56855918 | 7.0718  | 10.2518 | -0.9294 |
| YRI | PRR20A | 56860918 | 6.8628  | 9.7476  | -0.8837 |
| YRI | PRR20A | 56865918 | 5.8921  | 9.5795  | -1.148  |
| YRI | PRR20A | 56870918 | 4.5817  | 9.5795  | -1.556  |
| YRI | PRR20A | 56875918 | 3.9575  | 7.8989  | -1.4663 |

## 2\_TajimasD\_data

|     |        |          |         |         |         |
|-----|--------|----------|---------|---------|---------|
| YRI | PRR20A | 56880918 | 3.6289  | 7.2267  | -1.4518 |
| YRI | PRR20A | 56885918 | 3.5991  | 7.0586  | -1.4262 |
| YRI | PRR20A | 56890918 | 4.1999  | 8.235   | -1.4448 |
| YRI | PRR20A | 56895918 | 5.7878  | 9.2434  | -1.1121 |
| YRI | PRR20A | 56900918 | 5.4764  | 6.7225  | -0.5369 |
| YRI | PRR20A | 56905918 | 4.9032  | 6.0502  | -0.5435 |
| YRI | PRR20A | 56910918 | 5.3842  | 7.5628  | -0.8434 |
| YRI | PRR20A | 56915918 | 7.5991  | 9.2434  | -0.5292 |
| YRI | PRR20A | 56920918 | 7.8915  | 9.7476  | -0.5686 |
| YRI | PRR20A | 56925918 | 5.9758  | 8.7392  | -0.9367 |
| YRI | PRR20A | 56930918 | 4.8313  | 8.4031  | -1.2553 |
| YRI | PRR20A | 56935918 | 6.617   | 9.5795  | -0.9223 |
| YRI | PRR20A | 56940918 | 10.2458 | 12.7727 | -0.6007 |
| YRI | PRR20A | 56945918 | 9.237   | 14.7895 | -1.1487 |
| YRI | PRR20A | 56950918 | 9.6693  | 14.9575 | -1.0823 |
| YRI | PRR20A | 56955918 | 8.5222  | 11.7644 | -0.8329 |
| YRI | PRR20A | 56960918 | 4.8885  | 9.9157  | -1.5157 |
| YRI | PRR20A | 56965918 | 5.908   | 10.0837 | -1.2394 |
| YRI | PRR20A | 56970918 | 6.4868  | 9.0754  | -0.8474 |
| YRI | PRR20A | 56975918 | 7.4764  | 10.0837 | -0.7739 |
| YRI | PRR20A | 56980918 | 7.6369  | 9.5795  | -0.6048 |
| YRI | PRR20A | 56985918 | 6.9232  | 8.235   | -0.4697 |
| YRI | PRR20A | 56990918 | 8.9158  | 10.0837 | -0.3467 |
| YRI | PRR20A | 56995918 | 8.9688  | 10.4199 | -0.4177 |
| YRI | PRR20A | 57000918 | 6.3117  | 8.7392  | -0.8229 |
| YRI | PRR20A | 57005918 | 5.3161  | 9.2434  | -1.2639 |
| YRI | PRR20A | 57010918 | 7.1225  | 10.5879 | -0.9828 |
| YRI | PRR20A | 57015918 | 10.4128 | 13.1089 | -0.6254 |
| YRI | PRR20A | 57020918 | 9.8518  | 12.4366 | -0.6302 |
| YRI | PRR20A | 57025918 | 9.4615  | 11.5963 | -0.5559 |
| YRI | PRR20A | 57030918 | 12.9701 | 12.2685 | 0.1733  |
| YRI | PRR20A | 57035918 | 15.8133 | 13.1089 | 0.6273  |
| YRI | PRR20A | 57040918 | 13.406  | 12.2685 | 0.2809  |
| YRI | PRR20A | 57045918 | 7.1986  | 8.5712  | -0.4737 |
| YRI | PRR20A | 57050918 | 10.3898 | 9.5795  | 0.2523  |
| YRI | PRR20A | 57055918 | 13.5066 | 10.924  | 0.7113  |
| YRI | PRR20A | 57060918 | 10.1857 | 10.5879 | -0.1141 |
| YRI | PRR20A | 57065918 | 9.5186  | 10.4199 | -0.2595 |
| YRI | PRR20A | 57070918 | 10.5232 | 11.9324 | -0.3572 |
| YRI | PRR20A | 57075918 | 10.3372 | 12.1005 | -0.4411 |
| YRI | PRR20A | 57080918 | 12.7496 | 12.1005 | 0.1624  |
| YRI | PRR20A | 57085918 | 14.8305 | 12.2685 | 0.6327  |
| YRI | PRR20A | 57090918 | 13.7403 | 11.5963 | 0.5583  |
| YRI | PRR20A | 57095918 | 14.5929 | 12.9408 | 0.3879  |
| YRI | PRR20A | 57100918 | 15.3122 | 12.1005 | 0.8035  |
| YRI | PRR20A | 57105918 | 15.5119 | 11.0921 | 1.2     |
| YRI | PRR20A | 57110918 | 13.5388 | 11.4282 | 0.5572  |
| YRI | PRR20A | 57115918 | 9.7133  | 10.756  | -0.2914 |
| YRI | PRR20A | 57120918 | 5.5252  | 9.5795  | -1.2622 |

## 2\_TajimasD\_data

|     |        |          |        |         |         |
|-----|--------|----------|--------|---------|---------|
| YRI | PRR20A | 57125918 | 4.4177 | 9.0754  | -1.5247 |
| YRI | PRR20A | 57130918 | 4.974  | 8.5712  | -1.2414 |
| YRI | PRR20A | 57135918 | 3.8225 | 8.235   | -1.5799 |
| YRI | PRR20A | 57140918 | 4.1576 | 8.5712  | -1.5231 |
| YRI | PRR20A | 57145918 | 4.7529 | 7.8989  | -1.1704 |
| YRI | PRR20A | 57150918 | 5.443  | 9.2434  | -1.2231 |
| YRI | PRR20A | 57155918 | 4.5484 | 8.235   | -1.32   |
| YRI | PRR20A | 57160918 | 3.8911 | 7.2267  | -1.346  |
| YRI | PRR20A | 57165918 | 6.1471 | 11.5963 | -1.419  |
| YRI | PRR20A | 57170918 | 6.9001 | 12.2685 | -1.3257 |
| YRI | PRR20A | 57175918 | 5.7542 | 10.0837 | -1.2851 |
| YRI | PRR20A | 57180918 | 5.2776 | 10.0837 | -1.4265 |
| YRI | PRR20A | 57185918 | 3.5848 | 8.235   | -1.665  |
| YRI | PRR20A | 57190918 | 2.9543 | 6.8906  | -1.6586 |
| YRI | PRR20A | 57195918 | 6.5197 | 10.4199 | -1.1227 |
| YRI | PRR20A | 57200918 | 6.2515 | 11.7644 | -1.4163 |
| YRI | PRR20A | 57205918 | 4.7398 | 10.924  | -1.7032 |
| YRI | PRR20A | 57210918 | 6.2246 | 10.756  | -1.2663 |
| YRI | PRR20A | 57215918 | 5.3443 | 8.7392  | -1.1508 |
| YRI | PRR20A | 57220918 | 3.296  | 6.3864  | -1.3948 |
| YRI | PRR20A | 57225918 | 4.161  | 8.4031  | -1.4909 |
| YRI | PRR20A | 57230918 | 4.2521 | 10.2518 | -1.7536 |
| YRI | PRR20A | 57235918 | 2.2921 | 7.5628  | -2.0404 |
| YRI | PRR20A | 57240918 | 4.676  | 7.0586  | -0.9822 |
| YRI | PRR20A | 57245918 | 5.733  | 6.8906  | -0.4878 |
| YRI | PRR20A | 57250918 | 4.07   | 6.5544  | -1.0953 |
| YRI | PRR20A | 57255918 | 4.391  | 8.067   | -1.3414 |
| YRI | PRR20A | 57260918 | 3.6826 | 8.7392  | -1.7141 |
| YRI | PRR20A | 57265918 | 4.2128 | 8.5712  | -1.5041 |
| YRI | PRR20A | 57270918 | 4.4132 | 8.5712  | -1.4349 |
| YRI | PRR20A | 57275918 | 4.4593 | 8.9073  | -1.4814 |
| YRI | PRR20A | 57280918 | 5.0549 | 8.7392  | -1.2489 |
| YRI | PRR20A | 57285918 | 2.919  | 6.8906  | -1.6735 |
| YRI | PRR20A | 57290918 | 1.5692 | 5.0419  | -1.9349 |
| YRI | PRR20A | 57295918 | 5.1507 | 7.2267  | -0.8377 |
| YRI | PRR20A | 57300918 | 5.6029 | 7.7309  | -0.8074 |
| YRI | PRR20A | 57305918 | 3.1543 | 6.3864  | -1.4587 |
| YRI | PRR20A | 57310918 | 3.6768 | 6.5544  | -1.2687 |
| YRI | PRR20A | 57315918 | 4.5217 | 7.5628  | -1.1773 |
| YRI | PRR20A | 57320918 | 4.4527 | 8.235   | -1.3543 |
| YRI | PRR20A | 57325918 | 4.3773 | 8.235   | -1.3813 |
| YRI | PRR20A | 57330918 | 5.7507 | 8.235   | -0.8895 |
| YRI | PRR20A | 57335918 | 6.0953 | 9.4115  | -1.0496 |
| YRI | PRR20A | 57340918 | 5.7216 | 9.9157  | -1.2645 |
| YRI | PRR20A | 57345918 | 6.1944 | 8.235   | -0.7306 |
| YRI | PRR20A | 57350918 | 6.9875 | 8.9073  | -0.6394 |
| YRI | PRR20A | 57355918 | 7.4168 | 8.7392  | -0.4483 |
| YRI | PRR20A | 57360918 | 5.9284 | 7.5628  | -0.6327 |
| YRI | PRR20A | 57365918 | 3.0602 | 6.2183  | -1.46   |

## 2\_TajimasD\_data

|     |        |          |         |         |         |
|-----|--------|----------|---------|---------|---------|
| YRI | PRR20A | 57370918 | 2.8115  | 6.0502  | -1.5345 |
| YRI | PRR20A | 57375918 | 4.7264  | 9.0754  | -1.4236 |
| YRI | PRR20A | 57380918 | 4.2663  | 8.067   | -1.3869 |
| YRI | PRR20A | 57385918 | 2.4717  | 5.7141  | -1.6168 |
| YRI | PRR20A | 57390918 | 5.4498  | 8.9073  | -1.1515 |
| YRI | PRR20A | 57395918 | 9.1852  | 10.924  | -0.4789 |
| YRI | PRR20A | 57400918 | 8.3443  | 11.5963 | -0.8468 |
| YRI | PRR20A | 57405918 | 7.007   | 11.5963 | -1.1951 |
| YRI | PRR20A | 57410918 | 7.4995  | 9.9157  | -0.7285 |
| YRI | PRR20A | 57415918 | 6.9921  | 9.2434  | -0.7245 |
| YRI | PRR20A | 57420918 | 4.9631  | 7.8989  | -1.0922 |
| YRI | PRR20A | 57425918 | 5.8     | 8.4031  | -0.9149 |
| YRI | PRR20A | 57430918 | 6.281   | 9.0754  | -0.9147 |
| YRI | PRR20A | 57435918 | 4.9129  | 9.5795  | -1.4529 |
| YRI | PRR20A | 57440918 | 4.596   | 10.2518 | -1.653  |
| YRI | PRR20A | 57445918 | 7.2515  | 10.756  | -0.9793 |
| YRI | PRR20A | 57450918 | 9.4819  | 10.924  | -0.3972 |
| YRI | PRR20A | 57455918 | 6.5985  | 8.9073  | -0.769  |
| YRI | PRR20A | 57460918 | 4.404   | 8.7392  | -1.4695 |
| YRI | PRR20A | 57465918 | 5.5411  | 8.4031  | -1.0059 |
| YRI | PRR20A | 57470918 | 6.2084  | 8.9073  | -0.8989 |
| YRI | PRR20A | 57475918 | 4.6586  | 9.0754  | -1.4458 |
| YRI | PRR20A | 57480918 | 4.7458  | 8.067   | -1.2119 |
| YRI | PRR20A | 57485918 | 5.2777  | 7.7309  | -0.9308 |
| YRI | PRR20A | 57490918 | 4.6144  | 8.4031  | -1.3316 |
| YRI | PRR20A | 57495918 | 5.05    | 8.9073  | -1.2847 |
| YRI | PRR20A | 57500918 | 6.8244  | 9.0754  | -0.7369 |
| YRI | PRR20A | 57505918 | 8.0986  | 9.9157  | -0.5479 |
| YRI | PRR20A | 57510918 | 6.4885  | 8.067   | -0.576  |
| YRI | PRR20A | 57515918 | 6.7478  | 7.5628  | -0.3155 |
| YRI | PRR20A | 57520918 | 8.0543  | 8.9073  | -0.2841 |
| YRI | PRR20A | 57525918 | 6.3609  | 10.0837 | -1.105  |
| YRI | PRR20A | 57530918 | 5.6988  | 12.6047 | -1.6624 |
| YRI | PRR20A | 57535918 | 7.0582  | 13.445  | -1.4464 |
| YRI | PRR20A | 57540918 | 7.622   | 12.1005 | -1.1204 |
| YRI | PRR20A | 57545918 | 6.44    | 11.5963 | -1.3427 |
| YRI | PRR20A | 57550918 | 7.1132  | 11.7644 | -1.1949 |
| YRI | PRR20A | 57555918 | 12.8776 | 15.7978 | -0.5673 |
| YRI | PRR20A | 57560918 | 16.246  | 17.4785 | -0.2174 |
| YRI | PRR20A | 57565918 | 15.0446 | 16.302  | -0.237  |
| YRI | PRR20A | 57570918 | 15.4623 | 15.9659 | -0.0968 |
| YRI | PRR20A | 57575918 | 13.2651 | 12.7727 | 0.1171  |
| YRI | PRR20A | 57580918 | 12.1112 | 12.1005 | 0.0027  |
| YRI | PRR20A | 57585918 | 12.4902 | 12.9408 | -0.1058 |
| YRI | PRR20A | 57590918 | 9.4675  | 11.0921 | -0.4411 |
| YRI | PRR20A | 57595918 | 8.6868  | 9.9157  | -0.3705 |
| YRI | PRR20A | 57600918 | 11.9622 | 12.4366 | -0.1157 |
| YRI | PRR20A | 57605918 | 11.3289 | 13.613  | -0.5112 |
| YRI | PRR20A | 57610918 | 8.1661  | 10.924  | -0.7596 |

## 2\_TajimasD\_data

|     |        |          |         |         |         |
|-----|--------|----------|---------|---------|---------|
| YRI | PRR20A | 57615918 | 8.0896  | 11.9324 | -0.9741 |
| YRI | PRR20A | 57620918 | 6.0643  | 10.5879 | -1.2829 |
| YRI | PRR20A | 57625918 | 4.5254  | 8.7392  | -1.4284 |
| YRI | PRR20A | 57630918 | 5.0081  | 9.9157  | -1.4796 |
| YRI | PRR20A | 57635918 | 7.5831  | 9.2434  | -0.5343 |
| CEU | PRR20A | 56652488 | 3.5696  | 5.7991  | -1.1043 |
| CEU | PRR20A | 56657488 | 5.7739  | 6.9931  | -0.5101 |
| CEU | PRR20A | 56662488 | 11.0647 | 10.5749 | 0.1399  |
| CEU | PRR20A | 56667488 | 13.1295 | 9.5515  | 1.1241  |
| CEU | PRR20A | 56672488 | 13.3634 | 9.8926  | 1.0554  |
| CEU | PRR20A | 56677488 | 12.8755 | 10.5749 | 0.6573  |
| CEU | PRR20A | 56682488 | 12.1779 | 9.2104  | 0.9643  |
| CEU | PRR20A | 56687488 | 11.396  | 13.8156 | -0.5374 |
| CEU | PRR20A | 56692488 | 7.6827  | 13.3039 | -1.2939 |
| CEU | PRR20A | 56697488 | 4.8703  | 7.8459  | -1.1209 |
| CEU | PRR20A | 56702488 | 4.8825  | 6.3108  | -0.6558 |
| CEU | PRR20A | 56707488 | 3.5706  | 4.6052  | -0.6282 |
| CEU | PRR20A | 56712488 | 3.2536  | 5.7991  | -1.2608 |
| CEU | PRR20A | 56717488 | 4.1544  | 6.9931  | -1.1878 |
| CEU | PRR20A | 56722488 | 2.9823  | 5.1169  | -1.1815 |
| CEU | PRR20A | 56727488 | 4.2616  | 5.2874  | -0.5516 |
| CEU | PRR20A | 56732488 | 5.2744  | 5.2874  | -0.007  |
| CEU | PRR20A | 56737488 | 3.4483  | 3.4112  | 0.0291  |
| CEU | PRR20A | 56742488 | 1.835   | 3.0701  | -1.0595 |
| CEU | PRR20A | 56747488 | 2.0921  | 4.9463  | -1.6277 |
| CEU | PRR20A | 56752488 | 2.9831  | 4.9463  | -1.1196 |
| CEU | PRR20A | 56757488 | 2.1715  | 4.7757  | -1.5316 |
| CEU | PRR20A | 56762488 | 4.7108  | 6.8225  | -0.9036 |
| CEU | PRR20A | 56767488 | 6.0829  | 6.6519  | -0.2491 |
| CEU | PRR20A | 56772488 | 5.1602  | 6.1402  | -0.4612 |
| CEU | PRR20A | 56777488 | 4.2577  | 5.7991  | -0.7634 |
| CEU | PRR20A | 56782488 | 4.194   | 5.9697  | -0.857  |
| CEU | PRR20A | 56787488 | 4.8629  | 6.1402  | -0.6011 |
| CEU | PRR20A | 56792488 | 3.812   | 5.1169  | -0.7223 |
| CEU | PRR20A | 56797488 | 7.0353  | 7.1636  | -0.0525 |
| CEU | PRR20A | 56802488 | 9.6832  | 9.5515  | 0.0414  |
| CEU | PRR20A | 56807488 | 7.1723  | 7.8459  | -0.2538 |
| CEU | PRR20A | 56812488 | 6.1635  | 6.6519  | -0.2138 |
| CEU | PRR20A | 56817488 | 6.335   | 7.8459  | -0.5692 |
| CEU | PRR20A | 56822488 | 7.8127  | 8.187   | -0.1356 |
| CEU | PRR20A | 56827488 | 8.8946  | 6.8225  | 0.8866  |
| CEU | PRR20A | 56832488 | 8.4376  | 8.6987  | -0.0895 |
| CEU | PRR20A | 56837488 | 9.8287  | 9.3809  | 0.1431  |
| CEU | PRR20A | 56842488 | 11.1478 | 8.187   | 1.0726  |
| CEU | PRR20A | 56847488 | 7.4424  | 8.187   | -0.2698 |
| CEU | PRR20A | 56852488 | 4.9837  | 7.8459  | -1.0782 |
| CEU | PRR20A | 56857488 | 4.5976  | 7.1636  | -1.0504 |
| CEU | PRR20A | 56862488 | 3.5011  | 5.6286  | -1.0822 |
| CEU | PRR20A | 56867488 | 3.3572  | 5.1169  | -0.974  |

## 2\_TajimasD\_data

|     |        |          |         |         |         |
|-----|--------|----------|---------|---------|---------|
| CEU | PRR20A | 56872488 | 1.8724  | 4.0935  | -1.4935 |
| CEU | PRR20A | 56877488 | 2.3067  | 4.9463  | -1.5054 |
| CEU | PRR20A | 56882488 | 2.838   | 5.2874  | -1.3171 |
| CEU | PRR20A | 56887488 | 2.0744  | 4.4346  | -1.4809 |
| CEU | PRR20A | 56892488 | 2.6947  | 6.3108  | -1.6602 |
| CEU | PRR20A | 56897488 | 3.0961  | 6.8225  | -1.5945 |
| CEU | PRR20A | 56902488 | 3.249   | 4.9463  | -0.968  |
| CEU | PRR20A | 56907488 | 3.1786  | 5.1169  | -1.0729 |
| CEU | PRR20A | 56912488 | 3.2728  | 8.3576  | -1.8075 |
| CEU | PRR20A | 56917488 | 5.7355  | 10.5749 | -1.3827 |
| CEU | PRR20A | 56922488 | 6.0614  | 9.2104  | -1.0233 |
| CEU | PRR20A | 56927488 | 4.4368  | 8.0164  | -1.3221 |
| CEU | PRR20A | 56932488 | 3.4146  | 7.1636  | -1.5347 |
| CEU | PRR20A | 56937488 | 4.2228  | 6.8225  | -1.1124 |
| CEU | PRR20A | 56942488 | 5.9913  | 7.6753  | -0.6473 |
| CEU | PRR20A | 56947488 | 6.1107  | 8.5281  | -0.8435 |
| CEU | PRR20A | 56952488 | 6.1464  | 10.7454 | -1.2945 |
| CEU | PRR20A | 56957488 | 4.9227  | 9.3809  | -1.4242 |
| CEU | PRR20A | 56962488 | 5.7695  | 7.5047  | -0.6808 |
| CEU | PRR20A | 56967488 | 5.5236  | 8.3576  | -1.0074 |
| CEU | PRR20A | 56972488 | 3.7691  | 7.6753  | -1.5014 |
| CEU | PRR20A | 56977488 | 5.4733  | 7.1636  | -0.6919 |
| CEU | PRR20A | 56982488 | 5.1954  | 6.9931  | -0.7522 |
| CEU | PRR20A | 56987488 | 5.7271  | 7.5047  | -0.6974 |
| CEU | PRR20A | 56992488 | 7.3292  | 7.5047  | -0.0689 |
| CEU | PRR20A | 56997488 | 6.1814  | 6.9931  | -0.3396 |
| CEU | PRR20A | 57002488 | 5.2222  | 6.4814  | -0.5644 |
| CEU | PRR20A | 57007488 | 5.8901  | 6.1402  | -0.1177 |
| CEU | PRR20A | 57012488 | 7.511   | 7.1636  | 0.1422  |
| CEU | PRR20A | 57017488 | 9.006   | 8.5281  | 0.1667  |
| CEU | PRR20A | 57022488 | 8.6151  | 7.8459  | 0.2898  |
| CEU | PRR20A | 57027488 | 9.0796  | 8.5281  | 0.1924  |
| CEU | PRR20A | 57032488 | 15.0214 | 10.7454 | 1.2036  |
| CEU | PRR20A | 57037488 | 15.725  | 10.2337 | 1.6178  |
| CEU | PRR20A | 57042488 | 9.5935  | 7.5047  | 0.8195  |
| CEU | PRR20A | 57047488 | 7.3074  | 6.8225  | 0.2075  |
| CEU | PRR20A | 57052488 | 11.5704 | 9.8926  | 0.5102  |
| CEU | PRR20A | 57057488 | 12.0402 | 9.3809  | 0.8495  |
| CEU | PRR20A | 57062488 | 8.0282  | 6.6519  | 0.6026  |
| CEU | PRR20A | 57067488 | 9.356   | 7.3342  | 0.8101  |
| CEU | PRR20A | 57072488 | 11.5664 | 9.0398  | 0.8354  |
| CEU | PRR20A | 57077488 | 11.1804 | 9.0398  | 0.7077  |
| CEU | PRR20A | 57082488 | 11.4336 | 9.7221  | 0.5289  |
| CEU | PRR20A | 57087488 | 14.8957 | 10.5749 | 1.2345  |
| CEU | PRR20A | 57092488 | 15.453  | 9.7221  | 1.771   |
| CEU | PRR20A | 57097488 | 12.4577 | 8.5281  | 1.3711  |
| CEU | PRR20A | 57102488 | 11.7584 | 8.0164  | 1.3821  |
| CEU | PRR20A | 57107488 | 14.1251 | 8.6987  | 1.8591  |
| CEU | PRR20A | 57112488 | 11.5652 | 9.2104  | 0.7652  |



## 2\_TajimasD\_data

|     |        |          |        |        |         |
|-----|--------|----------|--------|--------|---------|
| CEU | PRR20A | 57117488 | 6.0278 | 8.5281 | -0.8724 |
| CEU | PRR20A | 57122488 | 4.8091 | 6.3108 | -0.6895 |
| CEU | PRR20A | 57127488 | 7.3189 | 7.1636 | 0.0636  |
| CEU | PRR20A | 57132488 | 6.2369 | 7.1636 | -0.3793 |
| CEU | PRR20A | 57137488 | 3.0891 | 4.9463 | -1.0592 |
| CEU | PRR20A | 57142488 | 3.6636 | 4.4346 | -0.4838 |
| CEU | PRR20A | 57147488 | 4.4719 | 6.3108 | -0.8443 |
| CEU | PRR20A | 57152488 | 5.1802 | 8.5281 | -1.1681 |
| CEU | PRR20A | 57157488 | 3.9936 | 6.4814 | -1.1151 |
| CEU | PRR20A | 57162488 | 5.7821 | 5.9697 | -0.0905 |
| CEU | PRR20A | 57167488 | 6.9318 | 6.4814 | 0.2019  |
| CEU | PRR20A | 57172488 | 4.7854 | 6.3108 | -0.7003 |
| CEU | PRR20A | 57177488 | 4.1608 | 7.6753 | -1.3509 |
| CEU | PRR20A | 57182488 | 5.9041 | 8.5281 | -0.9155 |
| CEU | PRR20A | 57187488 | 5.8308 | 7.5047 | -0.6568 |
| CEU | PRR20A | 57192488 | 3.6283 | 6.3108 | -1.2316 |
| CEU | PRR20A | 57197488 | 3.8862 | 6.3108 | -1.1132 |
| CEU | PRR20A | 57202488 | 3.9427 | 6.6519 | -1.1861 |
| CEU | PRR20A | 57207488 | 7.6407 | 9.0398 | -0.4626 |
| CEU | PRR20A | 57212488 | 6.8281 | 7.3342 | -0.2028 |
| CEU | PRR20A | 57217488 | 2.375  | 4.4346 | -1.2923 |
| CEU | PRR20A | 57222488 | 2.9017 | 5.1169 | -1.2262 |
| CEU | PRR20A | 57227488 | 3.7188 | 5.2874 | -0.8434 |
| CEU | PRR20A | 57232488 | 2.7328 | 5.458  | -1.4247 |
| CEU | PRR20A | 57237488 | 1.5496 | 4.9463 | -1.9371 |
| CEU | PRR20A | 57242488 | 4.1891 | 6.4814 | -1.0274 |
| CEU | PRR20A | 57247488 | 5.2491 | 6.6519 | -0.6142 |
| CEU | PRR20A | 57252488 | 3.652  | 4.7757 | -0.6609 |
| CEU | PRR20A | 57257488 | 2.6419 | 4.4346 | -1.1248 |
| CEU | PRR20A | 57262488 | 3.6968 | 5.458  | -0.9207 |
| CEU | PRR20A | 57267488 | 4.8536 | 5.9697 | -0.5386 |
| CEU | PRR20A | 57272488 | 4.5648 | 6.9931 | -1.016  |
| CEU | PRR20A | 57277488 | 5.2796 | 8.5281 | -1.1334 |
| CEU | PRR20A | 57282488 | 4.2351 | 6.8225 | -1.1071 |
| CEU | PRR20A | 57287488 | 2.5953 | 4.0935 | -1.0074 |
| CEU | PRR20A | 57292488 | 2.4572 | 4.6052 | -1.3041 |
| CEU | PRR20A | 57297488 | 2.9652 | 5.7991 | -1.4036 |
| CEU | PRR20A | 57302488 | 2.5545 | 6.1402 | -1.6873 |
| CEU | PRR20A | 57307488 | 2.7541 | 6.3108 | -1.633  |
| CEU | PRR20A | 57312488 | 4.073  | 6.1402 | -0.9728 |
| CEU | PRR20A | 57317488 | 5.967  | 6.8225 | -0.3661 |
| CEU | PRR20A | 57322488 | 6.323  | 6.4814 | -0.071  |
| CEU | PRR20A | 57327488 | 4.9895 | 6.4814 | -0.6687 |
| CEU | PRR20A | 57332488 | 4.9707 | 7.6753 | -1.0396 |
| CEU | PRR20A | 57337488 | 5.0047 | 7.1636 | -0.8837 |
| CEU | PRR20A | 57342488 | 6.6417 | 6.8225 | -0.0774 |
| CEU | PRR20A | 57347488 | 6.3158 | 6.6519 | -0.1472 |
| CEU | PRR20A | 57352488 | 6.2144 | 5.7991 | 0.2057  |
| CEU | PRR20A | 57357488 | 6.9546 | 6.9931 | -0.0161 |

## 2\_TajimasD\_data

|     |        |          |         |         |         |
|-----|--------|----------|---------|---------|---------|
| CEU | PRR20A | 57362488 | 4.2298  | 6.4814  | -1.0092 |
| CEU | PRR20A | 57367488 | 2.7615  | 4.9463  | -1.246  |
| CEU | PRR20A | 57372488 | 3.0093  | 5.1169  | -1.1666 |
| CEU | PRR20A | 57377488 | 4.0367  | 5.7991  | -0.8729 |
| CEU | PRR20A | 57382488 | 3.7833  | 6.4814  | -1.2093 |
| CEU | PRR20A | 57387488 | 3.8736  | 6.9931  | -1.3053 |
| CEU | PRR20A | 57392488 | 5.4537  | 7.8459  | -0.9012 |
| CEU | PRR20A | 57397488 | 6.0985  | 7.1636  | -0.436  |
| CEU | PRR20A | 57402488 | 6.4688  | 7.1636  | -0.2844 |
| CEU | PRR20A | 57407488 | 5.6931  | 7.1636  | -0.6019 |
| CEU | PRR20A | 57412488 | 6.1847  | 6.1402  | 0.0209  |
| CEU | PRR20A | 57417488 | 5.6094  | 5.1169  | 0.2726  |
| CEU | PRR20A | 57422488 | 3.4653  | 5.1169  | -0.9142 |
| CEU | PRR20A | 57427488 | 4.1336  | 5.7991  | -0.8249 |
| CEU | PRR20A | 57432488 | 4.9755  | 5.2874  | -0.1677 |
| CEU | PRR20A | 57437488 | 4.6425  | 5.2874  | -0.3468 |
| CEU | PRR20A | 57442488 | 4.898   | 5.9697  | -0.5172 |
| CEU | PRR20A | 57447488 | 7.3358  | 7.6753  | -0.1305 |
| CEU | PRR20A | 57452488 | 7.3659  | 7.5047  | -0.0545 |
| CEU | PRR20A | 57457488 | 4.021   | 6.4814  | -1.1028 |
| CEU | PRR20A | 57462488 | 4.4541  | 5.9697  | -0.7314 |
| CEU | PRR20A | 57467488 | 5.4478  | 4.2641  | 0.7684  |
| CEU | PRR20A | 57472488 | 5.9467  | 6.4814  | -0.2397 |
| CEU | PRR20A | 57477488 | 5.4892  | 7.3342  | -0.7392 |
| CEU | PRR20A | 57482488 | 4.6766  | 5.7991  | -0.556  |
| CEU | PRR20A | 57487488 | 5.3255  | 5.458   | -0.0693 |
| CEU | PRR20A | 57492488 | 3.6731  | 5.458   | -0.9331 |
| CEU | PRR20A | 57497488 | 2.0847  | 5.2874  | -1.7221 |
| CEU | PRR20A | 57502488 | 3.8303  | 5.7991  | -0.9751 |
| CEU | PRR20A | 57507488 | 5.5512  | 6.9931  | -0.6033 |
| CEU | PRR20A | 57512488 | 5.1878  | 6.1402  | -0.4482 |
| CEU | PRR20A | 57517488 | 4.792   | 6.3108  | -0.6973 |
| CEU | PRR20A | 57522488 | 3.8188  | 4.9463  | -0.643  |
| CEU | PRR20A | 57527488 | 2.8169  | 4.2641  | -0.9394 |
| CEU | PRR20A | 57532488 | 1.7285  | 3.7524  | -1.4663 |
| CEU | PRR20A | 57537488 | 2.4725  | 3.4112  | -0.7373 |
| CEU | PRR20A | 57542488 | 2.7767  | 4.7757  | -1.1757 |
| CEU | PRR20A | 57547488 | 1.3154  | 4.4346  | -1.9571 |
| CEU | PRR20A | 57552488 | 9.6257  | 8.0164  | 0.5944  |
| CEU | PRR20A | 57557488 | 17.0642 | 11.9394 | 1.3066  |
| CEU | PRR20A | 57562488 | 15.2053 | 11.2571 | 1.0639  |
| CEU | PRR20A | 57567488 | 15.5007 | 11.7688 | 0.9644  |
| CEU | PRR20A | 57572488 | 16.0359 | 11.7688 | 1.1028  |
| CEU | PRR20A | 57577488 | 16.2195 | 11.9394 | 1.0912  |
| CEU | PRR20A | 57582488 | 14.1767 | 10.5749 | 1.0291  |
| CEU | PRR20A | 57587488 | 12.9419 | 8.5281  | 1.54    |
| CEU | PRR20A | 57592488 | 15.153  | 9.5515  | 1.7598  |
| CEU | PRR20A | 57597488 | 15.1732 | 9.7221  | 1.6846  |
| CEU | PRR20A | 57602488 | 16.2542 | 10.0632 | 1.8527  |

## 2\_TajimasD\_data

|     |        |          |         |         |         |
|-----|--------|----------|---------|---------|---------|
| CEU | PRR20A | 57607488 | 14.1764 | 9.2104  | 1.6137  |
| CEU | PRR20A | 57612488 | 13.667  | 9.5515  | 1.2929  |
| CEU | PRR20A | 57617488 | 12.7176 | 9.2104  | 1.1397  |
| CEU | PRR20A | 57622488 | 7.3165  | 6.6519  | 0.291   |
| CEU | PRR20A | 57627488 | 5.4948  | 6.4814  | -0.4422 |
| CEU | PRR20A | 57632488 | 10.1416 | 8.5281  | 0.563   |
| CEU | PRR20A | 57637488 | 13.7116 | 10.0632 | 1.0918  |
| CEU | PRR20A | 57642488 | 9.0371  | 7.8459  | 0.4487  |
| CHB | PRR20A | 56652488 | 4.371   | 6.946   | -1.0809 |
| CHB | PRR20A | 56657488 | 6.2492  | 7.2848  | -0.4163 |
| CHB | PRR20A | 56662488 | 10.9987 | 10.3343 | 0.1934  |
| CHB | PRR20A | 56667488 | 13.2637 | 10.3343 | 0.8527  |
| CHB | PRR20A | 56672488 | 13.3149 | 10.1649 | 0.9312  |
| CHB | PRR20A | 56677488 | 11.7792 | 10.3343 | 0.4206  |
| CHB | PRR20A | 56682488 | 11.253  | 9.9955  | 0.3776  |
| CHB | PRR20A | 56687488 | 12.7552 | 16.0944 | -0.6394 |
| CHB | PRR20A | 56692488 | 8.997   | 15.7556 | -1.3208 |
| CHB | PRR20A | 56697488 | 4.2757  | 8.6402  | -1.5002 |
| CHB | PRR20A | 56702488 | 5.0781  | 7.6237  | -0.9817 |
| CHB | PRR20A | 56707488 | 4.3996  | 7.7931  | -1.2826 |
| CHB | PRR20A | 56712488 | 3.9971  | 9.3178  | -1.7055 |
| CHB | PRR20A | 56717488 | 5.222   | 10.1649 | -1.4612 |
| CHB | PRR20A | 56722488 | 3.4321  | 8.8096  | -1.8156 |
| CHB | PRR20A | 56727488 | 3.4352  | 9.6567  | -1.9292 |
| CHB | PRR20A | 56732488 | 4.8311  | 10.3343 | -1.6019 |
| CHB | PRR20A | 56737488 | 4.1348  | 9.9955  | -1.7599 |
| CHB | PRR20A | 56742488 | 2.7398  | 9.9955  | -2.1788 |
| CHB | PRR20A | 56747488 | 2.58    | 9.3178  | -2.1597 |
| CHB | PRR20A | 56752488 | 3.6583  | 8.1319  | -1.626  |
| CHB | PRR20A | 56757488 | 3.7575  | 7.4543  | -1.4552 |
| CHB | PRR20A | 56762488 | 3.4062  | 7.7931  | -1.658  |
| CHB | PRR20A | 56767488 | 3.8923  | 7.4543  | -1.4021 |
| CHB | PRR20A | 56772488 | 4.3417  | 8.8096  | -1.5085 |
| CHB | PRR20A | 56777488 | 3.2836  | 10.1649 | -2.0342 |
| CHB | PRR20A | 56782488 | 3.1572  | 8.3013  | -1.8346 |
| CHB | PRR20A | 56787488 | 3.4883  | 7.1154  | -1.4895 |
| CHB | PRR20A | 56792488 | 2.9682  | 8.4708  | -1.9263 |
| CHB | PRR20A | 56797488 | 5.1551  | 9.8261  | -1.4251 |
| CHB | PRR20A | 56802488 | 7.4567  | 9.9955  | -0.7624 |
| CHB | PRR20A | 56807488 | 6.5079  | 8.8096  | -0.7771 |
| CHB | PRR20A | 56812488 | 5.5484  | 8.1319  | -0.939  |
| CHB | PRR20A | 56817488 | 5.3821  | 9.3178  | -1.2615 |
| CHB | PRR20A | 56822488 | 7.1925  | 9.8261  | -0.8035 |
| CHB | PRR20A | 56827488 | 7.9206  | 9.6567  | -0.5383 |
| CHB | PRR20A | 56832488 | 7.525   | 8.1319  | -0.2206 |
| CHB | PRR20A | 56837488 | 8.0095  | 7.2848  | 0.2913  |
| CHB | PRR20A | 56842488 | 9.7339  | 9.4872  | 0.0778  |
| CHB | PRR20A | 56847488 | 8.2509  | 10.3343 | -0.6064 |
| CHB | PRR20A | 56852488 | 5.9406  | 7.9625  | -0.7493 |

## 2\_TajimasD\_data

|     |        |          |         |         |         |
|-----|--------|----------|---------|---------|---------|
| CHB | PRR20A | 56857488 | 4.7026  | 6.0989  | -0.6591 |
| CHB | PRR20A | 56862488 | 3.964   | 6.946   | -1.2517 |
| CHB | PRR20A | 56867488 | 4.3358  | 6.7766  | -1.0477 |
| CHB | PRR20A | 56872488 | 2.0628  | 4.5742  | -1.5292 |
| CHB | PRR20A | 56877488 | 2.1525  | 4.4048  | -1.4173 |
| CHB | PRR20A | 56882488 | 2.7967  | 5.0825  | -1.269  |
| CHB | PRR20A | 56887488 | 1.7678  | 5.4213  | -1.9158 |
| CHB | PRR20A | 56892488 | 1.8372  | 6.4378  | -2.0686 |
| CHB | PRR20A | 56897488 | 3.0748  | 6.2684  | -1.4709 |
| CHB | PRR20A | 56902488 | 3.5612  | 5.4213  | -0.9754 |
| CHB | PRR20A | 56907488 | 3.8878  | 6.0989  | -1.0437 |
| CHB | PRR20A | 56912488 | 3.919   | 7.1154  | -1.3127 |
| CHB | PRR20A | 56917488 | 4.9524  | 6.946   | -0.8368 |
| CHB | PRR20A | 56922488 | 4.5155  | 6.6072  | -0.9187 |
| CHB | PRR20A | 56927488 | 2.715   | 5.5907  | -1.4672 |
| CHB | PRR20A | 56932488 | 2.6722  | 4.913   | -1.2817 |
| CHB | PRR20A | 56937488 | 3.9711  | 6.0989  | -1.0044 |
| CHB | PRR20A | 56942488 | 5.0632  | 6.2684  | -0.5551 |
| CHB | PRR20A | 56947488 | 4.2511  | 6.946   | -1.1312 |
| CHB | PRR20A | 56952488 | 3.9105  | 8.3013  | -1.566  |
| CHB | PRR20A | 56957488 | 3.2357  | 6.946   | -1.5574 |
| CHB | PRR20A | 56962488 | 5.0377  | 6.7766  | -0.7464 |
| CHB | PRR20A | 56967488 | 5.3474  | 7.2848  | -0.7788 |
| CHB | PRR20A | 56972488 | 2.8511  | 5.5907  | -1.3978 |
| CHB | PRR20A | 56977488 | 4.3221  | 5.0825  | -0.4222 |
| CHB | PRR20A | 56982488 | 4.1683  | 5.7601  | -0.7908 |
| CHB | PRR20A | 56987488 | 4.5873  | 7.7931  | -1.2116 |
| CHB | PRR20A | 56992488 | 5.9741  | 8.1319  | -0.7843 |
| CHB | PRR20A | 56997488 | 5.4592  | 6.7766  | -0.5655 |
| CHB | PRR20A | 57002488 | 4.8315  | 6.0989  | -0.5983 |
| CHB | PRR20A | 57007488 | 4.5846  | 5.0825  | -0.2764 |
| CHB | PRR20A | 57012488 | 6.2258  | 7.1154  | -0.3653 |
| CHB | PRR20A | 57017488 | 7.3684  | 9.1484  | -0.5803 |
| CHB | PRR20A | 57022488 | 6.6187  | 8.6402  | -0.6949 |
| CHB | PRR20A | 57027488 | 7.5454  | 8.4708  | -0.324  |
| CHB | PRR20A | 57032488 | 12.4304 | 10.3343 | 0.6101  |
| CHB | PRR20A | 57037488 | 12.5945 | 10.5037 | 0.5994  |
| CHB | PRR20A | 57042488 | 7.5264  | 7.6237  | -0.0375 |
| CHB | PRR20A | 57047488 | 5.143   | 6.0989  | -0.4512 |
| CHB | PRR20A | 57052488 | 8.8127  | 8.1319  | 0.2475  |
| CHB | PRR20A | 57057488 | 9.7373  | 8.4708  | 0.4434  |
| CHB | PRR20A | 57062488 | 6.4991  | 6.946   | -0.1876 |
| CHB | PRR20A | 57067488 | 7.4184  | 7.1154  | 0.1244  |
| CHB | PRR20A | 57072488 | 8.9629  | 7.6237  | 0.5164  |
| CHB | PRR20A | 57077488 | 8.9197  | 7.2848  | 0.6572  |
| CHB | PRR20A | 57082488 | 9.3246  | 7.7931  | 0.5788  |
| CHB | PRR20A | 57087488 | 11.6497 | 8.979   | 0.886   |
| CHB | PRR20A | 57092488 | 11.4993 | 8.979   | 0.8361  |
| CHB | PRR20A | 57097488 | 9.6387  | 8.1319  | 0.5477  |

## 2\_TajimasD\_data

|     |        |          |         |        |         |
|-----|--------|----------|---------|--------|---------|
| CHB | PRR20A | 57102488 | 9.7114  | 7.1154 | 1.0661  |
| CHB | PRR20A | 57107488 | 10.8402 | 8.4708 | 0.8295  |
| CHB | PRR20A | 57112488 | 9.3974  | 8.3013 | 0.3909  |
| CHB | PRR20A | 57117488 | 5.4704  | 5.5907 | -0.0614 |
| CHB | PRR20A | 57122488 | 4.0476  | 4.2354 | -0.1223 |
| CHB | PRR20A | 57127488 | 6.6859  | 5.5907 | 0.5588  |
| CHB | PRR20A | 57132488 | 5.9484  | 6.0989 | -0.071  |
| CHB | PRR20A | 57137488 | 2.8896  | 5.0825 | -1.2175 |
| CHB | PRR20A | 57142488 | 3.3432  | 5.0825 | -0.9656 |
| CHB | PRR20A | 57147488 | 4.4917  | 6.4378 | -0.875  |
| CHB | PRR20A | 57152488 | 4.9684  | 6.946  | -0.8301 |
| CHB | PRR20A | 57157488 | 2.9046  | 5.2519 | -1.266  |
| CHB | PRR20A | 57162488 | 4.861   | 6.4378 | -0.709  |
| CHB | PRR20A | 57167488 | 6.5947  | 6.6072 | -0.0055 |
| CHB | PRR20A | 57172488 | 4.2541  | 5.2519 | -0.5381 |
| CHB | PRR20A | 57177488 | 3.3632  | 5.2519 | -1.0186 |
| CHB | PRR20A | 57182488 | 5.0805  | 5.5907 | -0.2603 |
| CHB | PRR20A | 57187488 | 5.4961  | 5.2519 | 0.1317  |
| CHB | PRR20A | 57192488 | 3.6214  | 4.7436 | -0.662  |
| CHB | PRR20A | 57197488 | 3.8106  | 6.2684 | -1.132  |
| CHB | PRR20A | 57202488 | 4.256   | 6.7766 | -1.082  |
| CHB | PRR20A | 57207488 | 6.9753  | 7.7931 | -0.3091 |
| CHB | PRR20A | 57212488 | 5.9303  | 6.4378 | -0.2282 |
| CHB | PRR20A | 57217488 | 2.5208  | 4.066  | -1.042  |
| CHB | PRR20A | 57222488 | 3.099   | 5.2519 | -1.1611 |
| CHB | PRR20A | 57227488 | 4.2479  | 6.4378 | -0.9847 |
| CHB | PRR20A | 57232488 | 3.4409  | 5.7601 | -1.1522 |
| CHB | PRR20A | 57237488 | 1.5104  | 3.8965 | -1.6689 |
| CHB | PRR20A | 57242488 | 3.5492  | 4.4048 | -0.5384 |
| CHB | PRR20A | 57247488 | 4.8772  | 6.0989 | -0.5767 |
| CHB | PRR20A | 57252488 | 3.4755  | 5.9295 | -1.188  |
| CHB | PRR20A | 57257488 | 2.5995  | 5.0825 | -1.3785 |
| CHB | PRR20A | 57262488 | 3.3653  | 5.4213 | -1.0781 |
| CHB | PRR20A | 57267488 | 4.2557  | 6.4378 | -0.9811 |
| CHB | PRR20A | 57272488 | 4.1666  | 6.7766 | -1.1204 |
| CHB | PRR20A | 57277488 | 5.478   | 7.4543 | -0.7779 |
| CHB | PRR20A | 57282488 | 4.7933  | 6.4378 | -0.7394 |
| CHB | PRR20A | 57287488 | 2.6492  | 4.4048 | -1.1047 |
| CHB | PRR20A | 57292488 | 2.5807  | 4.2354 | -1.0772 |
| CHB | PRR20A | 57297488 | 3.1217  | 4.5742 | -0.8845 |
| CHB | PRR20A | 57302488 | 2.2117  | 4.7436 | -1.4935 |
| CHB | PRR20A | 57307488 | 2.5673  | 4.5742 | -1.222  |
| CHB | PRR20A | 57312488 | 3.9042  | 4.913  | -0.577  |
| CHB | PRR20A | 57317488 | 5.7365  | 5.9295 | -0.0934 |
| CHB | PRR20A | 57322488 | 6.2808  | 6.7766 | -0.2128 |
| CHB | PRR20A | 57327488 | 5.1403  | 6.2684 | -0.5196 |
| CHB | PRR20A | 57332488 | 5.4944  | 5.9295 | -0.2106 |
| CHB | PRR20A | 57337488 | 5.2806  | 7.6237 | -0.9036 |
| CHB | PRR20A | 57342488 | 6.5842  | 8.4708 | -0.6604 |

## 2\_TajimasD\_data

|     |        |          |         |         |         |
|-----|--------|----------|---------|---------|---------|
| CHB | PRR20A | 57347488 | 7.3002  | 6.7766  | 0.2248  |
| CHB | PRR20A | 57352488 | 7.2835  | 6.6072  | 0.297   |
| CHB | PRR20A | 57357488 | 7.2753  | 6.946   | 0.1382  |
| CHB | PRR20A | 57362488 | 4.7895  | 5.2519  | -0.2494 |
| CHB | PRR20A | 57367488 | 3.2899  | 5.4213  | -1.1176 |
| CHB | PRR20A | 57372488 | 3.1698  | 6.4378  | -1.4694 |
| CHB | PRR20A | 57377488 | 4.3082  | 5.7601  | -0.7213 |
| CHB | PRR20A | 57382488 | 3.3853  | 4.4048  | -0.6415 |
| CHB | PRR20A | 57387488 | 3.1498  | 5.0825  | -1.073  |
| CHB | PRR20A | 57392488 | 6.158   | 7.1154  | -0.3932 |
| CHB | PRR20A | 57397488 | 6.8725  | 8.1319  | -0.4578 |
| CHB | PRR20A | 57402488 | 6.4769  | 8.3013  | -0.6507 |
| CHB | PRR20A | 57407488 | 5.593   | 7.1154  | -0.6252 |
| CHB | PRR20A | 57412488 | 6.0348  | 7.1154  | -0.4438 |
| CHB | PRR20A | 57417488 | 6.0063  | 6.946   | -0.3944 |
| CHB | PRR20A | 57422488 | 3.9884  | 5.9295  | -0.9397 |
| CHB | PRR20A | 57427488 | 3.8942  | 5.7601  | -0.927  |
| CHB | PRR20A | 57432488 | 5.0215  | 6.2684  | -0.5743 |
| CHB | PRR20A | 57437488 | 4.5007  | 6.4378  | -0.871  |
| CHB | PRR20A | 57442488 | 4.7508  | 5.5907  | -0.4285 |
| CHB | PRR20A | 57447488 | 7.098   | 6.4378  | 0.2968  |
| CHB | PRR20A | 57452488 | 7.0463  | 6.946   | 0.0421  |
| CHB | PRR20A | 57457488 | 3.806   | 6.2684  | -1.1341 |
| CHB | PRR20A | 57462488 | 4.2151  | 6.7766  | -1.0996 |
| CHB | PRR20A | 57467488 | 5.4613  | 6.7766  | -0.5646 |
| CHB | PRR20A | 57472488 | 5.9739  | 8.3013  | -0.8301 |
| CHB | PRR20A | 57477488 | 5.5572  | 7.7931  | -0.8451 |
| CHB | PRR20A | 57482488 | 4.3434  | 5.2519  | -0.49   |
| CHB | PRR20A | 57487488 | 4.9518  | 5.2519  | -0.1619 |
| CHB | PRR20A | 57492488 | 3.791   | 5.2519  | -0.7879 |
| CHB | PRR20A | 57497488 | 2.9435  | 5.5907  | -1.3507 |
| CHB | PRR20A | 57502488 | 4.4245  | 5.9295  | -0.7286 |
| CHB | PRR20A | 57507488 | 5.3775  | 6.0989  | -0.3405 |
| CHB | PRR20A | 57512488 | 5.1561  | 5.9295  | -0.3744 |
| CHB | PRR20A | 57517488 | 5.5168  | 6.7766  | -0.5408 |
| CHB | PRR20A | 57522488 | 4.6219  | 6.2684  | -0.7583 |
| CHB | PRR20A | 57527488 | 3.0859  | 5.9295  | -1.3766 |
| CHB | PRR20A | 57532488 | 2.147   | 8.1319  | -2.1754 |
| CHB | PRR20A | 57537488 | 2.8045  | 8.6402  | -2.0059 |
| CHB | PRR20A | 57542488 | 3.0946  | 8.1319  | -1.8309 |
| CHB | PRR20A | 57547488 | 1.6973  | 8.8096  | -2.4013 |
| CHB | PRR20A | 57552488 | 7.7394  | 10.8426 | -0.8636 |
| CHB | PRR20A | 57557488 | 16.1717 | 12.8755 | 0.7804  |
| CHB | PRR20A | 57562488 | 16.8582 | 12.1979 | 1.1611  |
| CHB | PRR20A | 57567488 | 15.5981 | 11.1814 | 1.1942  |
| CHB | PRR20A | 57572488 | 17.2142 | 11.6896 | 1.4327  |
| CHB | PRR20A | 57577488 | 17.5964 | 10.8426 | 1.8796  |
| CHB | PRR20A | 57582488 | 16.1475 | 10.3343 | 1.6921  |
| CHB | PRR20A | 57587488 | 15.1824 | 10.5037 | 1.3414  |

## 2\_TajimasD\_data

|     |        |          |         |         |         |
|-----|--------|----------|---------|---------|---------|
| CHB | PRR20A | 57592488 | 14.0343 | 11.012  | 0.829   |
| CHB | PRR20A | 57597488 | 13.2555 | 10.6731 | 0.7294  |
| CHB | PRR20A | 57602488 | 15.6004 | 10.5037 | 1.4612  |
| CHB | PRR20A | 57607488 | 14.7643 | 11.012  | 1.0292  |
| CHB | PRR20A | 57612488 | 14.6659 | 10.8426 | 1.064   |
| CHB | PRR20A | 57617488 | 13.2579 | 9.1484  | 1.3399  |
| CHB | PRR20A | 57622488 | 7.4635  | 6.2684  | 0.5504  |
| CHB | PRR20A | 57627488 | 6.3556  | 5.7601  | 0.2959  |
| CHB | PRR20A | 57632488 | 9.3017  | 7.7931  | 0.5702  |
| CHB | PRR20A | 57637488 | 11.9488 | 8.8096  | 1.0599  |
| CHB | PRR20A | 57642488 | 8.3297  | 7.4543  | 0.3446  |
| YRI | PRR20A | 56652488 | 6.098   | 9.0754  | -0.9746 |
| YRI | PRR20A | 56657488 | 8.3948  | 9.4115  | -0.3218 |
| YRI | PRR20A | 56662488 | 14.3657 | 13.9492 | 0.0911  |
| YRI | PRR20A | 56667488 | 16.8694 | 16.134  | 0.14    |
| YRI | PRR20A | 56672488 | 15.6746 | 15.6298 | 0.0088  |
| YRI | PRR20A | 56677488 | 14.9643 | 14.2853 | 0.1452  |
| YRI | PRR20A | 56682488 | 15.9037 | 16.134  | -0.0438 |
| YRI | PRR20A | 56687488 | 22.8671 | 22.6884 | 0.0245  |
| YRI | PRR20A | 56692488 | 18.7823 | 19.6633 | -0.1387 |
| YRI | PRR20A | 56697488 | 9.7541  | 13.2769 | -0.8074 |
| YRI | PRR20A | 56702488 | 10.9718 | 12.4366 | -0.3571 |
| YRI | PRR20A | 56707488 | 13.3919 | 12.9408 | 0.1059  |
| YRI | PRR20A | 56712488 | 15.8462 | 14.9575 | 0.1819  |
| YRI | PRR20A | 56717488 | 14.1307 | 13.613  | 0.1159  |
| YRI | PRR20A | 56722488 | 10.1565 | 10.924  | -0.2114 |
| YRI | PRR20A | 56727488 | 13.5821 | 12.6047 | 0.2353  |
| YRI | PRR20A | 56732488 | 17.3864 | 14.2853 | 0.663   |
| YRI | PRR20A | 56737488 | 14.0305 | 14.7895 | -0.157  |
| YRI | PRR20A | 56742488 | 10.4935 | 12.2685 | -0.4383 |
| YRI | PRR20A | 56747488 | 8.8427  | 10.4199 | -0.454  |
| YRI | PRR20A | 56752488 | 9.4391  | 10.756  | -0.368  |
| YRI | PRR20A | 56757488 | 9.6661  | 11.7644 | -0.5391 |
| YRI | PRR20A | 56762488 | 9.7833  | 14.4534 | -0.9875 |
| YRI | PRR20A | 56767488 | 9.6855  | 12.6047 | -0.7027 |
| YRI | PRR20A | 56772488 | 12.1587 | 12.2685 | -0.0271 |
| YRI | PRR20A | 56777488 | 15.1912 | 13.9492 | 0.2716  |
| YRI | PRR20A | 56782488 | 12.2993 | 11.9324 | 0.093   |
| YRI | PRR20A | 56787488 | 10.2018 | 11.9324 | -0.4387 |
| YRI | PRR20A | 56792488 | 10.5581 | 12.6047 | -0.4927 |
| YRI | PRR20A | 56797488 | 11.0045 | 11.5963 | -0.1541 |
| YRI | PRR20A | 56802488 | 9.9406  | 11.4282 | -0.3927 |
| YRI | PRR20A | 56807488 | 9.447   | 10.756  | -0.3658 |
| YRI | PRR20A | 56812488 | 8.4608  | 8.235   | 0.0808  |
| YRI | PRR20A | 56817488 | 9.4193  | 8.9073  | 0.1705  |
| YRI | PRR20A | 56822488 | 12.5628 | 13.2769 | -0.1637 |
| YRI | PRR20A | 56827488 | 11.9434 | 12.7727 | -0.1972 |
| YRI | PRR20A | 56832488 | 10.5344 | 10.4199 | 0.033   |
| YRI | PRR20A | 56837488 | 10.6759 | 9.9157  | 0.2292  |

## 2\_TajimasD\_data

|     |        |          |         |         |         |
|-----|--------|----------|---------|---------|---------|
| YRI | PRR20A | 56842488 | 13.423  | 12.2685 | 0.2851  |
| YRI | PRR20A | 56847488 | 11.9351 | 12.6047 | -0.1612 |
| YRI | PRR20A | 56852488 | 7.8631  | 10.924  | -0.843  |
| YRI | PRR20A | 56857488 | 6.1083  | 9.4115  | -1.0454 |
| YRI | PRR20A | 56862488 | 6.0978  | 8.9073  | -0.9357 |
| YRI | PRR20A | 56867488 | 6.4335  | 9.9157  | -1.0499 |
| YRI | PRR20A | 56872488 | 4.8737  | 9.4115  | -1.4362 |
| YRI | PRR20A | 56877488 | 3.9798  | 8.7392  | -1.6133 |
| YRI | PRR20A | 56882488 | 3.2373  | 7.0586  | -1.5753 |
| YRI | PRR20A | 56887488 | 2.5795  | 6.2183  | -1.6822 |
| YRI | PRR20A | 56892488 | 4.7726  | 8.235   | -1.2397 |
| YRI | PRR20A | 56897488 | 6.0106  | 8.5712  | -0.8837 |
| YRI | PRR20A | 56902488 | 4.3917  | 6.2183  | -0.8444 |
| YRI | PRR20A | 56907488 | 5.693   | 6.5544  | -0.3798 |
| YRI | PRR20A | 56912488 | 6.3537  | 7.8989  | -0.5748 |
| YRI | PRR20A | 56917488 | 7.3938  | 9.0754  | -0.5505 |
| YRI | PRR20A | 56922488 | 7.1056  | 9.5795  | -0.7702 |
| YRI | PRR20A | 56927488 | 5.5598  | 8.7392  | -1.0777 |
| YRI | PRR20A | 56932488 | 6.6153  | 9.7476  | -0.9595 |
| YRI | PRR20A | 56937488 | 9.2394  | 11.7644 | -0.6487 |
| YRI | PRR20A | 56942488 | 9.0775  | 12.2685 | -0.788  |
| YRI | PRR20A | 56947488 | 7.4165  | 13.613  | -1.3869 |
| YRI | PRR20A | 56952488 | 9.267   | 14.1172 | -1.0487 |
| YRI | PRR20A | 56957488 | 7.4076  | 10.924  | -0.9685 |
| YRI | PRR20A | 56962488 | 5.7608  | 11.4282 | -1.4962 |
| YRI | PRR20A | 56967488 | 7.083   | 10.924  | -1.0579 |
| YRI | PRR20A | 56972488 | 6.4956  | 7.7309  | -0.4687 |
| YRI | PRR20A | 56977488 | 6.3212  | 8.9073  | -0.8613 |
| YRI | PRR20A | 56982488 | 7.4805  | 9.9157  | -0.7342 |
| YRI | PRR20A | 56987488 | 8.1946  | 9.7476  | -0.4757 |
| YRI | PRR20A | 56992488 | 8.659   | 9.9157  | -0.3789 |
| YRI | PRR20A | 56997488 | 8.3101  | 10.5879 | -0.646  |
| YRI | PRR20A | 57002488 | 6.0942  | 9.0754  | -0.9759 |
| YRI | PRR20A | 57007488 | 5.8108  | 8.5712  | -0.9526 |
| YRI | PRR20A | 57012488 | 8.3797  | 12.1005 | -0.9309 |
| YRI | PRR20A | 57017488 | 9.8935  | 13.2769 | -0.7754 |
| YRI | PRR20A | 57022488 | 9.6637  | 11.5963 | -0.5033 |
| YRI | PRR20A | 57027488 | 9.2644  | 10.756  | -0.4168 |
| YRI | PRR20A | 57032488 | 14.5328 | 12.6047 | 0.4641  |
| YRI | PRR20A | 57037488 | 16.4217 | 13.2769 | 0.7207  |
| YRI | PRR20A | 57042488 | 9.9935  | 10.2518 | -0.0755 |
| YRI | PRR20A | 57047488 | 6.6718  | 8.4031  | -0.6085 |
| YRI | PRR20A | 57052488 | 12.7865 | 10.924  | 0.513   |
| YRI | PRR20A | 57057488 | 13.7107 | 11.0921 | 0.711   |
| YRI | PRR20A | 57062488 | 9.0251  | 10.4199 | -0.4015 |
| YRI | PRR20A | 57067488 | 10.167  | 11.2602 | -0.2927 |
| YRI | PRR20A | 57072488 | 11.3517 | 12.2685 | -0.2264 |
| YRI | PRR20A | 57077488 | 10.5797 | 11.7644 | -0.3044 |
| YRI | PRR20A | 57082488 | 12.0368 | 11.4282 | 0.1607  |



## 2\_TajimasD\_data

|     |        |          |         |         |         |
|-----|--------|----------|---------|---------|---------|
| YRI | PRR20A | 57087488 | 16.0995 | 12.7727 | 0.7909  |
| YRI | PRR20A | 57092488 | 16.2283 | 13.613  | 0.5854  |
| YRI | PRR20A | 57097488 | 13.5313 | 12.7727 | 0.1803  |
| YRI | PRR20A | 57102488 | 13.2371 | 10.5879 | 0.7513  |
| YRI | PRR20A | 57107488 | 15.5126 | 10.924  | 1.2638  |
| YRI | PRR20A | 57112488 | 13.3436 | 10.756  | 0.7231  |
| YRI | PRR20A | 57117488 | 7.7378  | 10.5879 | -0.8083 |
| YRI | PRR20A | 57122488 | 4.2002  | 9.2434  | -1.623  |
| YRI | PRR20A | 57127488 | 5.2404  | 8.7392  | -1.186  |
| YRI | PRR20A | 57132488 | 5.7554  | 9.2434  | -1.1225 |
| YRI | PRR20A | 57137488 | 3.1449  | 8.4031  | -1.848  |
| YRI | PRR20A | 57142488 | 3.3857  | 7.5628  | -1.6171 |
| YRI | PRR20A | 57147488 | 5.9067  | 8.235   | -0.8337 |
| YRI | PRR20A | 57152488 | 5.9938  | 9.4115  | -1.0817 |
| YRI | PRR20A | 57157488 | 3.4605  | 8.235   | -1.7095 |
| YRI | PRR20A | 57162488 | 5.2098  | 8.9073  | -1.2315 |
| YRI | PRR20A | 57167488 | 7.1156  | 11.9324 | -1.2211 |
| YRI | PRR20A | 57172488 | 5.3898  | 10.924  | -1.5242 |
| YRI | PRR20A | 57177488 | 4.5766  | 9.4115  | -1.5302 |
| YRI | PRR20A | 57182488 | 4.6644  | 9.4115  | -1.5024 |
| YRI | PRR20A | 57187488 | 4.27    | 8.4031  | -1.4526 |
| YRI | PRR20A | 57192488 | 3.9566  | 8.9073  | -1.6489 |
| YRI | PRR20A | 57197488 | 6.2038  | 10.4199 | -1.2137 |
| YRI | PRR20A | 57202488 | 5.7715  | 10.0837 | -1.2799 |
| YRI | PRR20A | 57207488 | 6.3666  | 12.1005 | -1.4345 |
| YRI | PRR20A | 57212488 | 6.0799  | 11.0921 | -1.3608 |
| YRI | PRR20A | 57217488 | 3.2715  | 6.0502  | -1.3166 |
| YRI | PRR20A | 57222488 | 3.3119  | 7.3947  | -1.6133 |
| YRI | PRR20A | 57227488 | 4.4643  | 9.7476  | -1.6185 |
| YRI | PRR20A | 57232488 | 4.0607  | 8.9073  | -1.6142 |
| YRI | PRR20A | 57237488 | 2.3866  | 6.7225  | -1.8683 |
| YRI | PRR20A | 57242488 | 5.3259  | 6.8906  | -0.6593 |
| YRI | PRR20A | 57247488 | 6.1276  | 7.8989  | -0.659  |
| YRI | PRR20A | 57252488 | 3.7849  | 7.0586  | -1.3496 |
| YRI | PRR20A | 57257488 | 3.9452  | 7.8989  | -1.4709 |
| YRI | PRR20A | 57262488 | 4.5112  | 9.0754  | -1.4941 |
| YRI | PRR20A | 57267488 | 3.9733  | 8.235   | -1.5259 |
| YRI | PRR20A | 57272488 | 3.3662  | 8.235   | -1.7433 |
| YRI | PRR20A | 57277488 | 4.5803  | 8.9073  | -1.4411 |
| YRI | PRR20A | 57282488 | 4.6875  | 7.7309  | -1.1547 |
| YRI | PRR20A | 57287488 | 3.2187  | 6.5544  | -1.4706 |
| YRI | PRR20A | 57292488 | 3.4828  | 6.7225  | -1.396  |
| YRI | PRR20A | 57297488 | 5.0845  | 7.5628  | -0.9594 |
| YRI | PRR20A | 57302488 | 4.4303  | 6.8906  | -1.0367 |
| YRI | PRR20A | 57307488 | 3.1134  | 6.5544  | -1.5171 |
| YRI | PRR20A | 57312488 | 3.5974  | 6.5544  | -1.3037 |
| YRI | PRR20A | 57317488 | 4.8141  | 7.5628  | -1.0641 |
| YRI | PRR20A | 57322488 | 4.2637  | 8.9073  | -1.5466 |
| YRI | PRR20A | 57327488 | 4.1777  | 7.8989  | -1.3844 |

## 2\_TajimasD\_data

|     |        |          |         |         |         |
|-----|--------|----------|---------|---------|---------|
| YRI | PRR20A | 57332488 | 5.8239  | 7.5628  | -0.6732 |
| YRI | PRR20A | 57337488 | 5.9732  | 9.9157  | -1.1887 |
| YRI | PRR20A | 57342488 | 6.4781  | 10.5879 | -1.1655 |
| YRI | PRR20A | 57347488 | 7.0848  | 8.067   | -0.3584 |
| YRI | PRR20A | 57352488 | 6.6029  | 8.5712  | -0.6793 |
| YRI | PRR20A | 57357488 | 6.7021  | 8.235   | -0.5489 |
| YRI | PRR20A | 57362488 | 4.9434  | 6.7225  | -0.7666 |
| YRI | PRR20A | 57367488 | 3.046   | 6.5544  | -1.5468 |
| YRI | PRR20A | 57372488 | 2.7916  | 7.0586  | -1.7591 |
| YRI | PRR20A | 57377488 | 4.8633  | 8.5712  | -1.2796 |
| YRI | PRR20A | 57382488 | 3.9814  | 6.8906  | -1.2258 |
| YRI | PRR20A | 57387488 | 3.1797  | 7.0586  | -1.5991 |
| YRI | PRR20A | 57392488 | 8.3544  | 11.0921 | -0.7433 |
| YRI | PRR20A | 57397488 | 8.1714  | 9.7476  | -0.4828 |
| YRI | PRR20A | 57402488 | 6.9309  | 10.5879 | -1.0371 |
| YRI | PRR20A | 57407488 | 7.1955  | 11.9324 | -1.2008 |
| YRI | PRR20A | 57412488 | 6.8007  | 9.5795  | -0.8651 |
| YRI | PRR20A | 57417488 | 7.4078  | 9.5795  | -0.6761 |
| YRI | PRR20A | 57422488 | 5.6418  | 7.8989  | -0.8397 |
| YRI | PRR20A | 57427488 | 5.0652  | 8.4031  | -1.1731 |
| YRI | PRR20A | 57432488 | 5.4201  | 9.2434  | -1.2304 |
| YRI | PRR20A | 57437488 | 4.5528  | 8.7392  | -1.4191 |
| YRI | PRR20A | 57442488 | 5.2664  | 10.756  | -1.5341 |
| YRI | PRR20A | 57447488 | 8.532   | 11.5963 | -0.798  |
| YRI | PRR20A | 57452488 | 9.3229  | 10.924  | -0.441  |
| YRI | PRR20A | 57457488 | 5.8218  | 9.2434  | -1.1012 |
| YRI | PRR20A | 57462488 | 4.5037  | 7.8989  | -1.2631 |
| YRI | PRR20A | 57467488 | 5.1898  | 7.3947  | -0.8713 |
| YRI | PRR20A | 57472488 | 6.0064  | 9.5795  | -1.1124 |
| YRI | PRR20A | 57477488 | 5.7669  | 9.7476  | -1.2194 |
| YRI | PRR20A | 57482488 | 4.6414  | 7.3947  | -1.088  |
| YRI | PRR20A | 57487488 | 4.9096  | 8.067   | -1.1522 |
| YRI | PRR20A | 57492488 | 4.4795  | 8.4031  | -1.379  |
| YRI | PRR20A | 57497488 | 5.3902  | 8.7392  | -1.1352 |
| YRI | PRR20A | 57502488 | 7.5803  | 9.7476  | -0.6639 |
| YRI | PRR20A | 57507488 | 6.9293  | 8.9073  | -0.6588 |
| YRI | PRR20A | 57512488 | 5.5389  | 7.5628  | -0.7835 |
| YRI | PRR20A | 57517488 | 8.3288  | 7.7309  | 0.2269  |
| YRI | PRR20A | 57522488 | 8.2478  | 9.7476  | -0.4594 |
| YRI | PRR20A | 57527488 | 5.4176  | 10.924  | -1.5166 |
| YRI | PRR20A | 57532488 | 5.7157  | 11.7644 | -1.5539 |
| YRI | PRR20A | 57537488 | 7.2085  | 12.9408 | -1.346  |
| YRI | PRR20A | 57542488 | 7.4348  | 12.2685 | -1.1937 |
| YRI | PRR20A | 57547488 | 6.2228  | 11.4282 | -1.3742 |
| YRI | PRR20A | 57552488 | 9.9682  | 13.613  | -0.8158 |
| YRI | PRR20A | 57557488 | 14.6034 | 17.4785 | -0.507  |
| YRI | PRR20A | 57562488 | 14.3918 | 16.6382 | -0.4153 |
| YRI | PRR20A | 57567488 | 14.9948 | 14.9575 | 0.0076  |
| YRI | PRR20A | 57572488 | 14.94   | 14.4534 | 0.1029  |

## 2\_TajimasD\_data

|     |        |          |         |         |         |
|-----|--------|----------|---------|---------|---------|
| YRI | PRR20A | 57577488 | 14.882  | 14.6214 | 0.0545  |
| YRI | PRR20A | 57582488 | 11.775  | 12.4366 | -0.1613 |
| YRI | PRR20A | 57587488 | 9.2985  | 10.4199 | -0.3228 |
| YRI | PRR20A | 57592488 | 10.8398 | 11.5963 | -0.197  |
| YRI | PRR20A | 57597488 | 9.9644  | 11.0921 | -0.3062 |
| YRI | PRR20A | 57602488 | 10.8982 | 11.9324 | -0.2622 |
| YRI | PRR20A | 57607488 | 9.7728  | 12.9408 | -0.7439 |
| YRI | PRR20A | 57612488 | 9.2651  | 12.7727 | -0.8339 |
| YRI | PRR20A | 57617488 | 8.3604  | 11.7644 | -0.8745 |
| YRI | PRR20A | 57622488 | 4.8619  | 9.2434  | -1.4101 |
| YRI | PRR20A | 57627488 | 4.1147  | 8.7392  | -1.5676 |
| YRI | PRR20A | 57632488 | 6.2543  | 9.9157  | -1.1039 |
| YRI | PRR20A | 57637488 | 9.385   | 10.4199 | -0.2979 |
| YRI | PRR20A | 57642488 | 6.5431  | 9.9157  | -1.0168 |
| CEU | PRR20A | 56659061 | 8.1272  | 8.3576  | -0.0819 |
| CEU | PRR20A | 56664061 | 10.3799 | 9.7221  | 0.2033  |
| CEU | PRR20A | 56669061 | 13.0548 | 9.7221  | 1.0299  |
| CEU | PRR20A | 56674061 | 13.5842 | 10.0632 | 1.0537  |
| CEU | PRR20A | 56679061 | 12.1884 | 9.7221  | 0.7622  |
| CEU | PRR20A | 56684061 | 11.1958 | 10.0632 | 0.3389  |
| CEU | PRR20A | 56689061 | 10.5718 | 13.9861 | -0.7495 |
| CEU | PRR20A | 56694061 | 7.0926  | 12.1099 | -1.2622 |
| CEU | PRR20A | 56699061 | 3.8351  | 6.9931  | -1.3214 |
| CEU | PRR20A | 56704061 | 4.45    | 5.9697  | -0.7334 |
| CEU | PRR20A | 56709061 | 3.8007  | 4.4346  | -0.3977 |
| CEU | PRR20A | 56714061 | 3.4529  | 5.9697  | -1.2146 |
| CEU | PRR20A | 56719061 | 4.4179  | 7.6753  | -1.2521 |
| CEU | PRR20A | 56724061 | 3.7868  | 5.2874  | -0.8069 |
| CEU | PRR20A | 56729061 | 3.7386  | 4.7757  | -0.61   |
| CEU | PRR20A | 56734061 | 4.6108  | 4.6052  | 0.0034  |
| CEU | PRR20A | 56739061 | 3.553   | 3.4112  | 0.1114  |
| CEU | PRR20A | 56744061 | 1.667   | 3.4112  | -1.3699 |
| CEU | PRR20A | 56749061 | 2.1635  | 4.7757  | -1.5363 |
| CEU | PRR20A | 56754061 | 2.8495  | 4.7757  | -1.1329 |
| CEU | PRR20A | 56759061 | 3.2764  | 5.458   | -1.1405 |
| CEU | PRR20A | 56764061 | 5.1697  | 7.3342  | -0.8672 |
| CEU | PRR20A | 56769061 | 5.905   | 6.4814  | -0.2584 |
| CEU | PRR20A | 56774061 | 5.4255  | 5.7991  | -0.185  |
| CEU | PRR20A | 56779061 | 3.2243  | 5.6286  | -1.223  |
| CEU | PRR20A | 56784061 | 4.6327  | 6.4814  | -0.8286 |
| CEU | PRR20A | 56789061 | 5.221   | 5.7991  | -0.2863 |
| CEU | PRR20A | 56794061 | 4.6479  | 5.7991  | -0.5702 |
| CEU | PRR20A | 56799061 | 8.2099  | 8.187   | 0.0083  |
| CEU | PRR20A | 56804061 | 8.8155  | 8.5281  | 0.1003  |
| CEU | PRR20A | 56809061 | 6.5578  | 7.8459  | -0.4852 |
| CEU | PRR20A | 56814061 | 6.1581  | 6.8225  | -0.2843 |
| CEU | PRR20A | 56819061 | 7.2507  | 7.8459  | -0.2242 |
| CEU | PRR20A | 56824061 | 6.7317  | 8.3576  | -0.578  |
| CEU | PRR20A | 56829061 | 8.8822  | 7.1636  | 0.7035  |

## 2\_TajimasD\_data

|     |        |          |         |         |         |
|-----|--------|----------|---------|---------|---------|
| CEU | PRR20A | 56834061 | 9.6537  | 8.3576  | 0.4607  |
| CEU | PRR20A | 56839061 | 8.9421  | 9.0398  | -0.0323 |
| CEU | PRR20A | 56844061 | 9.7124  | 7.6753  | 0.783   |
| CEU | PRR20A | 56849061 | 6.5182  | 8.187   | -0.6046 |
| CEU | PRR20A | 56854061 | 5.4861  | 8.0164  | -0.9346 |
| CEU | PRR20A | 56859061 | 5.5028  | 6.8225  | -0.5647 |
| CEU | PRR20A | 56864061 | 3.5013  | 5.9697  | -1.1913 |
| CEU | PRR20A | 56869061 | 2.342   | 4.4346  | -1.313  |
| CEU | PRR20A | 56874061 | 1.41    | 4.0935  | -1.8045 |
| CEU | PRR20A | 56879061 | 2.8091  | 5.1169  | -1.2774 |
| CEU | PRR20A | 56884061 | 3.2604  | 4.9463  | -0.9615 |
| CEU | PRR20A | 56889061 | 2.2748  | 5.1169  | -1.5732 |
| CEU | PRR20A | 56894061 | 2.7648  | 6.8225  | -1.7363 |
| CEU | PRR20A | 56899061 | 3.9478  | 6.6519  | -1.1839 |
| CEU | PRR20A | 56904061 | 3.2923  | 4.7757  | -0.8724 |
| CEU | PRR20A | 56909061 | 1.6637  | 4.9463  | -1.8721 |
| CEU | PRR20A | 56914061 | 3.2904  | 9.3809  | -1.9457 |
| CEU | PRR20A | 56919061 | 6.3626  | 10.5749 | -1.2035 |
| CEU | PRR20A | 56924061 | 6.3389  | 9.0398  | -0.893  |
| CEU | PRR20A | 56929061 | 3.7401  | 7.3342  | -1.44   |
| CEU | PRR20A | 56934061 | 2.8163  | 5.9697  | -1.5219 |
| CEU | PRR20A | 56939061 | 4.3111  | 7.3342  | -1.2113 |
| CEU | PRR20A | 56944061 | 6.6712  | 7.8459  | -0.4425 |
| CEU | PRR20A | 56949061 | 8.0627  | 10.4043 | -0.6793 |
| CEU | PRR20A | 56954061 | 5.5166  | 10.7454 | -1.4718 |
| CEU | PRR20A | 56959061 | 4.1626  | 8.0164  | -1.4234 |
| CEU | PRR20A | 56964061 | 5.7924  | 7.6753  | -0.7237 |
| CEU | PRR20A | 56969061 | 5.0855  | 8.0164  | -1.0825 |
| CEU | PRR20A | 56974061 | 4.3519  | 8.0164  | -1.3535 |
| CEU | PRR20A | 56979061 | 5.4362  | 7.3342  | -0.7605 |
| CEU | PRR20A | 56984061 | 5.4313  | 7.1636  | -0.7091 |
| CEU | PRR20A | 56989061 | 7.0579  | 8.187   | -0.409  |
| CEU | PRR20A | 56994061 | 7.6708  | 7.3342  | 0.1349  |
| CEU | PRR20A | 56999061 | 5.3018  | 6.1402  | -0.3945 |
| CEU | PRR20A | 57004061 | 5.0561  | 6.8225  | -0.7558 |
| CEU | PRR20A | 57009061 | 5.4088  | 5.7991  | -0.1933 |
| CEU | PRR20A | 57014061 | 6.8071  | 6.4814  | 0.146   |
| CEU | PRR20A | 57019061 | 9.6675  | 8.5281  | 0.3976  |
| CEU | PRR20A | 57024061 | 9.8388  | 9.0398  | 0.2642  |
| CEU | PRR20A | 57029061 | 9.7032  | 9.0398  | 0.2193  |
| CEU | PRR20A | 57034061 | 14.4156 | 9.7221  | 1.4504  |
| CEU | PRR20A | 57039061 | 15.1779 | 10.0632 | 1.5306  |
| CEU | PRR20A | 57044061 | 9.8716  | 7.6753  | 0.8442  |
| CEU | PRR20A | 57049061 | 7.0917  | 6.9931  | 0.0413  |
| CEU | PRR20A | 57054061 | 11.9625 | 9.8926  | 0.6294  |
| CEU | PRR20A | 57059061 | 11.866  | 9.0398  | 0.9344  |
| CEU | PRR20A | 57064061 | 7.1175  | 6.4814  | 0.2851  |
| CEU | PRR20A | 57069061 | 9.1973  | 7.1636  | 0.8325  |
| CEU | PRR20A | 57074061 | 11.3182 | 8.6987  | 0.8974  |

## 2\_TajimasD\_data

|     |        |          |         |         |         |
|-----|--------|----------|---------|---------|---------|
| CEU | PRR20A | 57079061 | 13.9948 | 10.4043 | 1.0416  |
| CEU | PRR20A | 57084061 | 12.5674 | 9.8926  | 0.8133  |
| CEU | PRR20A | 57089061 | 12.9143 | 9.7221  | 0.9865  |
| CEU | PRR20A | 57094061 | 14.0267 | 9.5515  | 1.4059  |
| CEU | PRR20A | 57099061 | 11.6549 | 8.3576  | 1.1721  |
| CEU | PRR20A | 57104061 | 15.3424 | 9.2104  | 1.9926  |
| CEU | PRR20A | 57109061 | 14.1653 | 9.3809  | 1.5284  |
| CEU | PRR20A | 57114061 | 9.1934  | 9.0398  | 0.0508  |
| CEU | PRR20A | 57119061 | 5.4418  | 7.3342  | -0.7582 |
| CEU | PRR20A | 57124061 | 4.4838  | 5.9697  | -0.7171 |
| CEU | PRR20A | 57129061 | 7.2412  | 7.1636  | 0.0318  |
| CEU | PRR20A | 57134061 | 5.7598  | 5.9697  | -0.1013 |
| CEU | PRR20A | 57139061 | 3.2136  | 5.1169  | -1.0535 |
| CEU | PRR20A | 57144061 | 2.8219  | 4.9463  | -1.2115 |
| CEU | PRR20A | 57149061 | 4.047   | 6.6519  | -1.1405 |
| CEU | PRR20A | 57154061 | 5.7124  | 8.5281  | -0.9824 |
| CEU | PRR20A | 57159061 | 4.4929  | 6.1402  | -0.7752 |
| CEU | PRR20A | 57164061 | 5.1892  | 5.458   | -0.1405 |
| CEU | PRR20A | 57169061 | 7.3616  | 6.8225  | 0.2307  |
| CEU | PRR20A | 57174061 | 5.3529  | 7.1636  | -0.7412 |
| CEU | PRR20A | 57179061 | 5.5982  | 8.187   | -0.9379 |
| CEU | PRR20A | 57184061 | 5.7654  | 7.6753  | -0.7341 |
| CEU | PRR20A | 57189061 | 3.873   | 6.8225  | -1.2621 |
| CEU | PRR20A | 57194061 | 3.6877  | 6.9931  | -1.383  |
| CEU | PRR20A | 57199061 | 4.3706  | 7.6753  | -1.2702 |
| CEU | PRR20A | 57204061 | 5.2907  | 7.5047  | -0.8687 |
| CEU | PRR20A | 57209061 | 6.6768  | 6.9931  | -0.1323 |
| CEU | PRR20A | 57214061 | 5.04    | 5.6286  | -0.2994 |
| CEU | PRR20A | 57219061 | 3.6665  | 5.1169  | -0.8028 |
| CEU | PRR20A | 57224061 | 3.9623  | 5.6286  | -0.8476 |
| CEU | PRR20A | 57229061 | 2.4978  | 5.7991  | -1.6351 |
| CEU | PRR20A | 57234061 | 2.2041  | 5.6286  | -1.7419 |
| CEU | PRR20A | 57239061 | 3.7184  | 5.1169  | -0.7741 |
| CEU | PRR20A | 57244061 | 4.0982  | 6.6519  | -1.1181 |
| CEU | PRR20A | 57249061 | 3.5528  | 6.1402  | -1.2176 |
| CEU | PRR20A | 57254061 | 3.5716  | 3.9229  | -0.245  |
| CEU | PRR20A | 57259061 | 3.6382  | 4.6052  | -0.5871 |
| CEU | PRR20A | 57264061 | 3.3286  | 6.1402  | -1.3231 |
| CEU | PRR20A | 57269061 | 3.8767  | 5.6286  | -0.8911 |
| CEU | PRR20A | 57274061 | 4.5749  | 7.1636  | -1.0597 |
| CEU | PRR20A | 57279061 | 5.1174  | 8.3576  | -1.1518 |
| CEU | PRR20A | 57284061 | 4.8665  | 6.4814  | -0.7238 |
| CEU | PRR20A | 57289061 | 2.1952  | 3.7524  | -1.1282 |
| CEU | PRR20A | 57294061 | 1.934   | 4.7757  | -1.6713 |
| CEU | PRR20A | 57299061 | 3.0251  | 6.1402  | -1.4659 |
| CEU | PRR20A | 57304061 | 2.4059  | 5.6286  | -1.6393 |
| CEU | PRR20A | 57309061 | 3.2837  | 6.3108  | -1.3898 |
| CEU | PRR20A | 57314061 | 5.422   | 7.3342  | -0.7662 |
| CEU | PRR20A | 57319061 | 5.8528  | 6.8225  | -0.4149 |

## 2\_TajimasD\_data

|     |        |          |         |         |         |
|-----|--------|----------|---------|---------|---------|
| CEU | PRR20A | 57324061 | 6.4117  | 6.8225  | -0.1758 |
| CEU | PRR20A | 57329061 | 5.6133  | 7.1636  | -0.6346 |
| CEU | PRR20A | 57334061 | 3.5535  | 6.8225  | -1.3988 |
| CEU | PRR20A | 57339061 | 5.5609  | 6.9931  | -0.5993 |
| CEU | PRR20A | 57344061 | 6.699   | 6.4814  | 0.0975  |
| CEU | PRR20A | 57349061 | 6.416   | 6.8225  | -0.1739 |
| CEU | PRR20A | 57354061 | 8.1049  | 6.8225  | 0.5487  |
| CEU | PRR20A | 57359061 | 5.3373  | 6.4814  | -0.5128 |
| CEU | PRR20A | 57364061 | 2.2618  | 5.2874  | -1.6269 |
| CEU | PRR20A | 57369061 | 3.2966  | 5.7991  | -1.2395 |
| CEU | PRR20A | 57374061 | 3.1268  | 5.458   | -1.2187 |
| CEU | PRR20A | 57379061 | 4.215   | 5.458   | -0.6498 |
| CEU | PRR20A | 57384061 | 4.3257  | 7.3342  | -1.2054 |
| CEU | PRR20A | 57389061 | 3.5982  | 7.1636  | -1.4595 |
| CEU | PRR20A | 57394061 | 6.2202  | 6.9931  | -0.3234 |
| CEU | PRR20A | 57399061 | 5.7759  | 6.6519  | -0.3835 |
| CEU | PRR20A | 57404061 | 5.4315  | 7.5047  | -0.8134 |
| CEU | PRR20A | 57409061 | 7.3713  | 7.1636  | 0.085   |
| CEU | PRR20A | 57414061 | 5.8905  | 5.458   | 0.2261  |
| CEU | PRR20A | 57419061 | 3.9641  | 4.9463  | -0.5601 |
| CEU | PRR20A | 57424061 | 3.845   | 5.2874  | -0.7756 |
| CEU | PRR20A | 57429061 | 4.4389  | 5.7991  | -0.6737 |
| CEU | PRR20A | 57434061 | 5.0684  | 5.2874  | -0.1178 |
| CEU | PRR20A | 57439061 | 4.0909  | 5.2874  | -0.6434 |
| CEU | PRR20A | 57444061 | 6.0792  | 6.8225  | -0.3181 |
| CEU | PRR20A | 57449061 | 8.2511  | 7.5047  | 0.2929  |
| CEU | PRR20A | 57454061 | 6.1051  | 7.1636  | -0.4333 |
| CEU | PRR20A | 57459061 | 4.0332  | 6.6519  | -1.1465 |
| CEU | PRR20A | 57464061 | 4.483   | 5.2874  | -0.4325 |
| CEU | PRR20A | 57469061 | 6.6455  | 4.9463  | 0.9691  |
| CEU | PRR20A | 57474061 | 5.7336  | 7.1636  | -0.5854 |
| CEU | PRR20A | 57479061 | 4.0596  | 6.9931  | -1.2274 |
| CEU | PRR20A | 57484061 | 4.8819  | 5.1169  | -0.1301 |
| CEU | PRR20A | 57489061 | 4.9623  | 4.9463  | 0.0091  |
| CEU | PRR20A | 57494061 | 3.6654  | 5.7991  | -1.0568 |
| CEU | PRR20A | 57499061 | 2.7934  | 6.1402  | -1.5749 |
| CEU | PRR20A | 57504061 | 4.3366  | 6.4814  | -0.9613 |
| CEU | PRR20A | 57509061 | 5.5512  | 6.8225  | -0.544  |
| CEU | PRR20A | 57514061 | 4.3263  | 5.2874  | -0.5168 |
| CEU | PRR20A | 57519061 | 4.1775  | 5.458   | -0.6694 |
| CEU | PRR20A | 57524061 | 3.713   | 5.458   | -0.9122 |
| CEU | PRR20A | 57529061 | 2.3401  | 3.9229  | -1.104  |
| CEU | PRR20A | 57534061 | 2.5055  | 3.5818  | -0.8112 |
| CEU | PRR20A | 57539061 | 2.8541  | 4.0935  | -0.8334 |
| CEU | PRR20A | 57544061 | 1.9291  | 3.9229  | -1.3906 |
| CEU | PRR20A | 57549061 | 2.1546  | 5.6286  | -1.7671 |
| CEU | PRR20A | 57554061 | 14.1149 | 10.5749 | 1.0114  |
| CEU | PRR20A | 57559061 | 18.3091 | 11.5982 | 1.7583  |
| CEU | PRR20A | 57564061 | 13.343  | 10.916  | 0.6731  |

## 2\_TajimasD\_data

|     |        |          |         |         |         |
|-----|--------|----------|---------|---------|---------|
| CEU | PRR20A | 57569061 | 17.0091 | 12.6216 | 1.0615  |
| CEU | PRR20A | 57574061 | 16.3096 | 11.5982 | 1.2344  |
| CEU | PRR20A | 57579061 | 14.0522 | 10.7454 | 0.9308  |
| CEU | PRR20A | 57584061 | 14.5209 | 10.2337 | 1.263   |
| CEU | PRR20A | 57589061 | 13.2484 | 9.0398  | 1.3915  |
| CEU | PRR20A | 57594061 | 13.7518 | 9.5515  | 1.3196  |
| CEU | PRR20A | 57599061 | 16.4387 | 9.8926  | 1.9905  |
| CEU | PRR20A | 57604061 | 16.8414 | 9.7221  | 2.2001  |
| CEU | PRR20A | 57609061 | 13.3367 | 8.8692  | 1.5033  |
| CEU | PRR20A | 57614061 | 13.3671 | 9.5515  | 1.1987  |
| CEU | PRR20A | 57619061 | 11.3787 | 8.5281  | 0.9946  |
| CEU | PRR20A | 57624061 | 5.7886  | 6.3108  | -0.2398 |
| CEU | PRR20A | 57629061 | 6.6293  | 6.8225  | -0.0827 |
| CEU | PRR20A | 57634061 | 11.4529 | 8.8692  | 0.8694  |
| CEU | PRR20A | 57639061 | 11.8223 | 8.8692  | 0.9937  |
| CEU | PRR20A | 57644061 | 8.8743  | 7.8459  | 0.3874  |
| CEU | PRR20A | 57649061 | 12.3294 | 10.5749 | 0.5013  |
| CHB | PRR20A | 56659061 | 8.3948  | 8.3013  | 0.0333  |
| CHB | PRR20A | 56664061 | 10.6179 | 9.9955  | 0.1869  |
| CHB | PRR20A | 56669061 | 13.447  | 10.6731 | 0.7835  |
| CHB | PRR20A | 56674061 | 13.1645 | 10.8426 | 0.6462  |
| CHB | PRR20A | 56679061 | 10.7441 | 9.6567  | 0.3372  |
| CHB | PRR20A | 56684061 | 10.5606 | 11.012  | -0.1238 |
| CHB | PRR20A | 56689061 | 12.2482 | 17.2803 | -0.9002 |
| CHB | PRR20A | 56694061 | 8.1237  | 14.0615 | -1.2931 |
| CHB | PRR20A | 56699061 | 3.091   | 6.6072  | -1.5444 |
| CHB | PRR20A | 56704061 | 5.2191  | 7.9625  | -1.0166 |
| CHB | PRR20A | 56709061 | 4.6907  | 8.1319  | -1.2508 |
| CHB | PRR20A | 56714061 | 3.8176  | 9.1484  | -1.738  |
| CHB | PRR20A | 56719061 | 5.4816  | 10.5037 | -1.4398 |
| CHB | PRR20A | 56724061 | 4.2128  | 8.1319  | -1.4245 |
| CHB | PRR20A | 56729061 | 3.0381  | 10.1649 | -2.1068 |
| CHB | PRR20A | 56734061 | 4.4584  | 11.5202 | -1.8567 |
| CHB | PRR20A | 56739061 | 4.1119  | 9.1484  | -1.6421 |
| CHB | PRR20A | 56744061 | 2.9496  | 9.6567  | -2.0797 |
| CHB | PRR20A | 56749061 | 2.6823  | 9.8261  | -2.1796 |
| CHB | PRR20A | 56754061 | 3.2494  | 8.3013  | -1.8017 |
| CHB | PRR20A | 56759061 | 3.9897  | 6.946   | -1.2409 |
| CHB | PRR20A | 56764061 | 3.2374  | 7.2848  | -1.6269 |
| CHB | PRR20A | 56769061 | 4.1188  | 7.9625  | -1.4244 |
| CHB | PRR20A | 56774061 | 4.5258  | 9.3178  | -1.536  |
| CHB | PRR20A | 56779061 | 2.9751  | 9.8261  | -2.0902 |
| CHB | PRR20A | 56784061 | 3.2073  | 7.9625  | -1.7621 |
| CHB | PRR20A | 56789061 | 3.3221  | 7.4543  | -1.6265 |
| CHB | PRR20A | 56794061 | 3.9044  | 9.3178  | -1.7352 |
| CHB | PRR20A | 56799061 | 6.2835  | 10.1649 | -1.1474 |
| CHB | PRR20A | 56804061 | 6.8669  | 9.3178  | -0.7856 |
| CHB | PRR20A | 56809061 | 6.0893  | 7.9625  | -0.6941 |
| CHB | PRR20A | 56814061 | 5.4262  | 8.1319  | -0.9835 |

## 2\_TajimasD\_data

|     |        |          |         |         |         |
|-----|--------|----------|---------|---------|---------|
| CHB | PRR20A | 56819061 | 6.1283  | 9.6567  | -1.0941 |
| CHB | PRR20A | 56824061 | 6.6592  | 9.9955  | -1.0018 |
| CHB | PRR20A | 56829061 | 8.2686  | 9.6567  | -0.4304 |
| CHB | PRR20A | 56834061 | 8.3398  | 7.4543  | 0.3486  |
| CHB | PRR20A | 56839061 | 7.7289  | 7.6237  | 0.0406  |
| CHB | PRR20A | 56844061 | 9.122   | 9.4872  | -0.1151 |
| CHB | PRR20A | 56849061 | 7.5648  | 9.8261  | -0.6899 |
| CHB | PRR20A | 56854061 | 5.9199  | 7.9625  | -0.7569 |
| CHB | PRR20A | 56859061 | 5.0682  | 6.6072  | -0.6759 |
| CHB | PRR20A | 56864061 | 4.3031  | 7.1154  | -1.1549 |
| CHB | PRR20A | 56869061 | 2.916   | 5.5907  | -1.3647 |
| CHB | PRR20A | 56874061 | 1.3996  | 4.066   | -1.798  |
| CHB | PRR20A | 56879061 | 2.4997  | 4.7436  | -1.3236 |
| CHB | PRR20A | 56884061 | 3.1249  | 5.5907  | -1.2581 |
| CHB | PRR20A | 56889061 | 2.1165  | 5.7601  | -1.8102 |
| CHB | PRR20A | 56894061 | 2.222   | 6.0989  | -1.8301 |
| CHB | PRR20A | 56899061 | 3.7171  | 6.946   | -1.3554 |
| CHB | PRR20A | 56904061 | 3.2212  | 5.4213  | -1.1537 |
| CHB | PRR20A | 56909061 | 2.8489  | 5.5907  | -1.3989 |
| CHB | PRR20A | 56914061 | 4.2082  | 7.6237  | -1.3171 |
| CHB | PRR20A | 56919061 | 5.1902  | 6.6072  | -0.6224 |
| CHB | PRR20A | 56924061 | 4.6077  | 6.4378  | -0.8229 |
| CHB | PRR20A | 56929061 | 2.2692  | 5.0825  | -1.5619 |
| CHB | PRR20A | 56934061 | 2.3008  | 4.913   | -1.4942 |
| CHB | PRR20A | 56939061 | 3.8989  | 6.2684  | -1.0913 |
| CHB | PRR20A | 56944061 | 5.2817  | 7.1154  | -0.753  |
| CHB | PRR20A | 56949061 | 5.2671  | 8.1319  | -1.0413 |
| CHB | PRR20A | 56954061 | 3.6455  | 6.946   | -1.3854 |
| CHB | PRR20A | 56959061 | 3.4019  | 6.7766  | -1.4486 |
| CHB | PRR20A | 56964061 | 5.0385  | 6.6072  | -0.689  |
| CHB | PRR20A | 56969061 | 4.6364  | 6.7766  | -0.9187 |
| CHB | PRR20A | 56974061 | 3.6187  | 6.2684  | -1.2204 |
| CHB | PRR20A | 56979061 | 4.482   | 5.2519  | -0.4152 |
| CHB | PRR20A | 56984061 | 3.9448  | 6.2684  | -1.0702 |
| CHB | PRR20A | 56989061 | 5.5092  | 7.9625  | -0.9091 |
| CHB | PRR20A | 56994061 | 6.6389  | 8.3013  | -0.5929 |
| CHB | PRR20A | 56999061 | 4.7059  | 6.4378  | -0.7787 |
| CHB | PRR20A | 57004061 | 4.0059  | 5.7601  | -0.8715 |
| CHB | PRR20A | 57009061 | 4.4847  | 4.913   | -0.245  |
| CHB | PRR20A | 57014061 | 6.0318  | 7.2848  | -0.5037 |
| CHB | PRR20A | 57019061 | 7.8024  | 9.3178  | -0.4857 |
| CHB | PRR20A | 57024061 | 7.7561  | 8.6402  | -0.3039 |
| CHB | PRR20A | 57029061 | 7.9749  | 9.3178  | -0.4305 |
| CHB | PRR20A | 57034061 | 11.8808 | 9.6567  | 0.6896  |
| CHB | PRR20A | 57039061 | 12.3647 | 10.3343 | 0.591   |
| CHB | PRR20A | 57044061 | 7.285   | 7.6237  | -0.1306 |
| CHB | PRR20A | 57049061 | 4.988   | 5.7601  | -0.3836 |
| CHB | PRR20A | 57054061 | 9.6461  | 8.979   | 0.2213  |
| CHB | PRR20A | 57059061 | 9.1112  | 8.4708  | 0.2242  |



## 2\_TajimasD\_data

|     |        |          |         |        |         |
|-----|--------|----------|---------|--------|---------|
| CHB | PRR20A | 57064061 | 5.5549  | 5.9295 | -0.1813 |
| CHB | PRR20A | 57069061 | 7.5896  | 6.2684 | 0.6085  |
| CHB | PRR20A | 57074061 | 9.098   | 7.9625 | 0.4208  |
| CHB | PRR20A | 57079061 | 11.0893 | 8.979  | 0.7001  |
| CHB | PRR20A | 57084061 | 9.9423  | 7.7931 | 0.8123  |
| CHB | PRR20A | 57089061 | 9.9914  | 8.1319 | 0.6759  |
| CHB | PRR20A | 57094061 | 10.4845 | 8.8096 | 0.5655  |
| CHB | PRR20A | 57099061 | 9.1369  | 7.2848 | 0.7445  |
| CHB | PRR20A | 57104061 | 12.1218 | 8.4708 | 1.2781  |
| CHB | PRR20A | 57109061 | 10.9832 | 8.8096 | 0.7339  |
| CHB | PRR20A | 57114061 | 8.2565  | 7.2848 | 0.3906  |
| CHB | PRR20A | 57119061 | 5.0169  | 5.4213 | -0.2121 |
| CHB | PRR20A | 57124061 | 3.6018  | 4.066  | -0.313  |
| CHB | PRR20A | 57129061 | 6.7529  | 5.9295 | 0.3986  |
| CHB | PRR20A | 57134061 | 5.4955  | 5.9295 | -0.2101 |
| CHB | PRR20A | 57139061 | 2.91    | 4.913  | -1.1457 |
| CHB | PRR20A | 57144061 | 2.5682  | 5.2519 | -1.4474 |
| CHB | PRR20A | 57149061 | 4.075   | 6.2684 | -1.0102 |
| CHB | PRR20A | 57154061 | 4.8919  | 6.7766 | -0.809  |
| CHB | PRR20A | 57159061 | 3.3636  | 5.5907 | -1.1363 |
| CHB | PRR20A | 57164061 | 4.803   | 5.5907 | -0.4019 |
| CHB | PRR20A | 57169061 | 6.9374  | 6.6072 | 0.145   |
| CHB | PRR20A | 57174061 | 4.7207  | 6.0989 | -0.6506 |
| CHB | PRR20A | 57179061 | 4.6977  | 5.5907 | -0.4556 |
| CHB | PRR20A | 57184061 | 5.1028  | 5.4213 | -0.167  |
| CHB | PRR20A | 57189061 | 3.9383  | 4.913  | -0.5575 |
| CHB | PRR20A | 57194061 | 3.6954  | 5.4213 | -0.905  |
| CHB | PRR20A | 57199061 | 4.0832  | 6.4378 | -1.0587 |
| CHB | PRR20A | 57204061 | 4.7226  | 6.6072 | -0.8277 |
| CHB | PRR20A | 57209061 | 6.2204  | 7.1154 | -0.3675 |
| CHB | PRR20A | 57214061 | 4.9397  | 5.9295 | -0.4792 |
| CHB | PRR20A | 57219061 | 3.8561  | 4.7436 | -0.5235 |
| CHB | PRR20A | 57224061 | 4.487   | 5.9295 | -0.6983 |
| CHB | PRR20A | 57229061 | 3.0449  | 6.4378 | -1.5256 |
| CHB | PRR20A | 57234061 | 2.4715  | 4.913  | -1.3965 |
| CHB | PRR20A | 57239061 | 3.0786  | 3.8965 | -0.5721 |
| CHB | PRR20A | 57244061 | 3.5494  | 4.7436 | -0.7044 |
| CHB | PRR20A | 57249061 | 3.5123  | 6.0989 | -1.221  |
| CHB | PRR20A | 57254061 | 3.3626  | 5.5907 | -1.1368 |
| CHB | PRR20A | 57259061 | 3.3349  | 4.913  | -0.9027 |
| CHB | PRR20A | 57264061 | 3.0977  | 5.5907 | -1.272  |
| CHB | PRR20A | 57269061 | 3.5332  | 6.6072 | -1.3501 |
| CHB | PRR20A | 57274061 | 4.1864  | 7.1154 | -1.2029 |
| CHB | PRR20A | 57279061 | 5.463   | 7.1154 | -0.6786 |
| CHB | PRR20A | 57284061 | 5.2696  | 6.4378 | -0.5253 |
| CHB | PRR20A | 57289061 | 2.1258  | 3.8965 | -1.2385 |
| CHB | PRR20A | 57294061 | 2.0365  | 3.5577 | -1.1496 |
| CHB | PRR20A | 57299061 | 3.1314  | 4.7436 | -0.951  |
| CHB | PRR20A | 57304061 | 2.2022  | 4.7436 | -1.4991 |

## 2\_TajimasD\_data

|     |        |          |        |        |         |
|-----|--------|----------|--------|--------|---------|
| CHB | PRR20A | 57309061 | 3.0257 | 5.0825 | -1.1419 |
| CHB | PRR20A | 57314061 | 5.4123 | 5.5907 | -0.091  |
| CHB | PRR20A | 57319061 | 5.7059 | 6.0989 | -0.1855 |
| CHB | PRR20A | 57324061 | 6.285  | 7.1154 | -0.341  |
| CHB | PRR20A | 57329061 | 5.7904 | 5.9295 | -0.0673 |
| CHB | PRR20A | 57334061 | 4.0866 | 5.5907 | -0.7674 |
| CHB | PRR20A | 57339061 | 5.8401 | 8.4708 | -0.9209 |
| CHB | PRR20A | 57344061 | 6.7858 | 8.3013 | -0.5405 |
| CHB | PRR20A | 57349061 | 7.3758 | 6.7766 | 0.2572  |
| CHB | PRR20A | 57354061 | 9.2145 | 7.2848 | 0.7757  |
| CHB | PRR20A | 57359061 | 5.5526 | 5.5907 | -0.0194 |
| CHB | PRR20A | 57364061 | 2.5715 | 4.2354 | -1.0832 |
| CHB | PRR20A | 57369061 | 3.7689 | 6.0989 | -1.0999 |
| CHB | PRR20A | 57374061 | 3.4567 | 6.7766 | -1.4251 |
| CHB | PRR20A | 57379061 | 4.3052 | 5.5907 | -0.6559 |
| CHB | PRR20A | 57384061 | 3.554  | 4.5742 | -0.6212 |
| CHB | PRR20A | 57389061 | 3.4131 | 5.5907 | -1.1111 |
| CHB | PRR20A | 57394061 | 6.9532 | 7.7931 | -0.3174 |
| CHB | PRR20A | 57399061 | 6.506  | 7.7931 | -0.4865 |
| CHB | PRR20A | 57404061 | 5.9176 | 7.4543 | -0.6049 |
| CHB | PRR20A | 57409061 | 6.9273 | 7.4543 | -0.2074 |
| CHB | PRR20A | 57414061 | 5.5005 | 6.7766 | -0.5478 |
| CHB | PRR20A | 57419061 | 4.5709 | 6.0989 | -0.7213 |
| CHB | PRR20A | 57424061 | 4.2682 | 6.4378 | -0.9755 |
| CHB | PRR20A | 57429061 | 4.4489 | 6.2684 | -0.838  |
| CHB | PRR20A | 57434061 | 5.0227 | 6.0989 | -0.508  |
| CHB | PRR20A | 57439061 | 3.9471 | 5.7601 | -0.9007 |
| CHB | PRR20A | 57444061 | 5.7757 | 6.2684 | -0.2269 |
| CHB | PRR20A | 57449061 | 7.6444 | 6.7766 | 0.3725  |
| CHB | PRR20A | 57454061 | 6.1211 | 6.946  | -0.3463 |
| CHB | PRR20A | 57459061 | 3.8816 | 6.946  | -1.2863 |
| CHB | PRR20A | 57464061 | 4.1898 | 5.9295 | -0.8422 |
| CHB | PRR20A | 57469061 | 6.8403 | 7.1154 | -0.113  |
| CHB | PRR20A | 57474061 | 5.4517 | 8.1319 | -0.9742 |
| CHB | PRR20A | 57479061 | 4.2281 | 7.1154 | -1.1857 |
| CHB | PRR20A | 57484061 | 4.831  | 5.4213 | -0.3095 |
| CHB | PRR20A | 57489061 | 4.7198 | 5.0825 | -0.2014 |
| CHB | PRR20A | 57494061 | 3.8654 | 5.5907 | -0.8803 |
| CHB | PRR20A | 57499061 | 3.438  | 5.7601 | -1.1537 |
| CHB | PRR20A | 57504061 | 4.7297 | 5.9295 | -0.5808 |
| CHB | PRR20A | 57509061 | 5.3215 | 6.2684 | -0.4361 |
| CHB | PRR20A | 57514061 | 4.8332 | 6.0989 | -0.5975 |
| CHB | PRR20A | 57519061 | 4.8302 | 6.2684 | -0.6624 |
| CHB | PRR20A | 57524061 | 4.2026 | 6.2684 | -0.9514 |
| CHB | PRR20A | 57529061 | 2.9313 | 7.1154 | -1.7183 |
| CHB | PRR20A | 57534061 | 2.7961 | 8.3013 | -1.9634 |
| CHB | PRR20A | 57539061 | 3.0491 | 8.1319 | -1.8475 |
| CHB | PRR20A | 57544061 | 2.4458 | 8.4708 | -2.1092 |
| CHB | PRR20A | 57549061 | 2.2252 | 9.1484 | -2.2572 |

## 2\_TajimasD\_data

|     |        |          |         |         |         |
|-----|--------|----------|---------|---------|---------|
| CHB | PRR20A | 57554061 | 10.9832 | 11.6896 | -0.1832 |
| CHB | PRR20A | 57559061 | 17.0554 | 12.7061 | 1.0426  |
| CHB | PRR20A | 57564061 | 16.193  | 11.1814 | 1.3551  |
| CHB | PRR20A | 57569061 | 18.9435 | 12.7061 | 1.4953  |
| CHB | PRR20A | 57574061 | 17.003  | 11.6896 | 1.3779  |
| CHB | PRR20A | 57579061 | 14.9513 | 9.4872  | 1.7224  |
| CHB | PRR20A | 57584061 | 16.8178 | 11.1814 | 1.524   |
| CHB | PRR20A | 57589061 | 14.2442 | 10.3343 | 1.1381  |
| CHB | PRR20A | 57594061 | 12.4948 | 10.6731 | 0.5145  |
| CHB | PRR20A | 57599061 | 15.4411 | 11.3508 | 1.0905  |
| CHB | PRR20A | 57604061 | 16.2945 | 10.1649 | 1.812   |
| CHB | PRR20A | 57609061 | 13.7295 | 10.1649 | 1.0537  |
| CHB | PRR20A | 57614061 | 14.458  | 10.6731 | 1.069   |
| CHB | PRR20A | 57619061 | 11.6547 | 8.8096  | 0.9606  |
| CHB | PRR20A | 57624061 | 6.2115  | 5.5907  | 0.3167  |
| CHB | PRR20A | 57629061 | 7.197   | 6.0989  | 0.5184  |
| CHB | PRR20A | 57634061 | 10.1268 | 8.4708  | 0.5797  |
| CHB | PRR20A | 57639061 | 10.269  | 8.1319  | 0.7768  |
| CHB | PRR20A | 57644061 | 8.7714  | 7.1154  | 0.6801  |
| CHB | PRR20A | 57649061 | 11.7748 | 9.1484  | 0.8563  |
| YRI | PRR20A | 56659061 | 11.0224 | 11.0921 | -0.0189 |
| YRI | PRR20A | 56664061 | 13.6411 | 13.7811 | -0.031  |
| YRI | PRR20A | 56669061 | 15.4921 | 15.7978 | -0.0594 |
| YRI | PRR20A | 56674061 | 15.2446 | 14.9575 | 0.0588  |
| YRI | PRR20A | 56679061 | 14.6922 | 13.445  | 0.2825  |
| YRI | PRR20A | 56684061 | 19.8936 | 18.4868 | 0.2351  |
| YRI | PRR20A | 56689061 | 23.1346 | 23.8648 | -0.0954 |
| YRI | PRR20A | 56694061 | 14.6507 | 17.6465 | -0.5235 |
| YRI | PRR20A | 56699061 | 8.4183  | 11.9324 | -0.8908 |
| YRI | PRR20A | 56704061 | 11.7482 | 12.2685 | -0.1285 |
| YRI | PRR20A | 56709061 | 14.4103 | 13.2769 | 0.2598  |
| YRI | PRR20A | 56714061 | 14.9778 | 14.6214 | 0.0745  |
| YRI | PRR20A | 56719061 | 12.8628 | 12.7727 | 0.0214  |
| YRI | PRR20A | 56724061 | 9.613   | 10.5879 | -0.2765 |
| YRI | PRR20A | 56729061 | 15.8047 | 13.7811 | 0.4477  |
| YRI | PRR20A | 56734061 | 18.3526 | 15.4617 | 0.5732  |
| YRI | PRR20A | 56739061 | 11.8477 | 13.1089 | -0.2926 |
| YRI | PRR20A | 56744061 | 9.7548  | 12.1005 | -0.5868 |
| YRI | PRR20A | 56749061 | 9.9007  | 11.2602 | -0.3639 |
| YRI | PRR20A | 56754061 | 9.7678  | 10.0837 | -0.0938 |
| YRI | PRR20A | 56759061 | 9.2079  | 12.1005 | -0.7237 |
| YRI | PRR20A | 56764061 | 10.4342 | 14.9575 | -0.9257 |
| YRI | PRR20A | 56769061 | 10.2785 | 12.6047 | -0.56   |
| YRI | PRR20A | 56774061 | 12.9408 | 12.7727 | 0.04    |
| YRI | PRR20A | 56779061 | 14.8009 | 13.613  | 0.2659  |
| YRI | PRR20A | 56784061 | 10.5899 | 11.4282 | -0.2213 |
| YRI | PRR20A | 56789061 | 9.8921  | 11.7644 | -0.481  |
| YRI | PRR20A | 56794061 | 11.6885 | 12.6047 | -0.2206 |
| YRI | PRR20A | 56799061 | 11.94   | 12.9408 | -0.235  |

## 2\_TajimasD\_data

|     |        |          |         |         |         |
|-----|--------|----------|---------|---------|---------|
| YRI | PRR20A | 56804061 | 9.6493  | 11.4282 | -0.4696 |
| YRI | PRR20A | 56809061 | 8.7426  | 8.9073  | -0.0549 |
| YRI | PRR20A | 56814061 | 8.1804  | 7.7309  | 0.1706  |
| YRI | PRR20A | 56819061 | 10.5109 | 11.4282 | -0.2422 |
| YRI | PRR20A | 56824061 | 12.1344 | 13.613  | -0.3309 |
| YRI | PRR20A | 56829061 | 12.0297 | 11.0921 | 0.2546  |
| YRI | PRR20A | 56834061 | 10.8956 | 9.9157  | 0.2954  |
| YRI | PRR20A | 56839061 | 10.3371 | 10.756  | -0.1171 |
| YRI | PRR20A | 56844061 | 12.6111 | 12.7727 | -0.0384 |
| YRI | PRR20A | 56849061 | 11.2129 | 11.0921 | 0.0328  |
| YRI | PRR20A | 56854061 | 7.8569  | 10.2518 | -0.7    |
| YRI | PRR20A | 56859061 | 7.2133  | 10.756  | -0.99   |
| YRI | PRR20A | 56864061 | 6.5975  | 9.4115  | -0.8906 |
| YRI | PRR20A | 56869061 | 4.5926  | 9.0754  | -1.4674 |
| YRI | PRR20A | 56874061 | 3.8566  | 8.5712  | -1.627  |
| YRI | PRR20A | 56879061 | 3.8073  | 8.5712  | -1.644  |
| YRI | PRR20A | 56884061 | 3.4211  | 7.2267  | -1.5356 |
| YRI | PRR20A | 56889061 | 4.0279  | 7.0586  | -1.2494 |
| YRI | PRR20A | 56894061 | 5.3529  | 8.4031  | -1.072  |
| YRI | PRR20A | 56899061 | 6.0366  | 7.8989  | -0.6928 |
| YRI | PRR20A | 56904061 | 4.6925  | 6.0502  | -0.6433 |
| YRI | PRR20A | 56909061 | 4.8297  | 6.5544  | -0.7604 |
| YRI | PRR20A | 56914061 | 6.1565  | 8.7392  | -0.8755 |
| YRI | PRR20A | 56919061 | 7.6313  | 9.7476  | -0.6483 |
| YRI | PRR20A | 56924061 | 7.8587  | 9.5795  | -0.5357 |
| YRI | PRR20A | 56929061 | 4.6587  | 8.067   | -1.2437 |
| YRI | PRR20A | 56934061 | 5.8451  | 9.2434  | -1.0937 |
| YRI | PRR20A | 56939061 | 9.9683  | 11.7644 | -0.4614 |
| YRI | PRR20A | 56944061 | 9.9376  | 14.6214 | -0.9795 |
| YRI | PRR20A | 56949061 | 9.3467  | 14.9575 | -1.1483 |
| YRI | PRR20A | 56954061 | 7.7288  | 11.9324 | -1.0656 |
| YRI | PRR20A | 56959061 | 5.7476  | 10.756  | -1.3996 |
| YRI | PRR20A | 56964061 | 6.0269  | 10.5879 | -1.2935 |
| YRI | PRR20A | 56969061 | 6.6762  | 9.9157  | -0.9767 |
| YRI | PRR20A | 56974061 | 7.0642  | 9.2434  | -0.7013 |
| YRI | PRR20A | 56979061 | 7.2371  | 8.9073  | -0.5563 |
| YRI | PRR20A | 56984061 | 7.1269  | 9.0754  | -0.6378 |
| YRI | PRR20A | 56989061 | 8.8701  | 9.9157  | -0.3152 |
| YRI | PRR20A | 56994061 | 10.2211 | 10.756  | -0.1495 |
| YRI | PRR20A | 56999061 | 7.1871  | 10.0837 | -0.8598 |
| YRI | PRR20A | 57004061 | 5.4423  | 9.4115  | -1.2562 |
| YRI | PRR20A | 57009061 | 5.2629  | 7.8989  | -0.9807 |
| YRI | PRR20A | 57014061 | 8.0833  | 11.4282 | -0.8831 |
| YRI | PRR20A | 57019061 | 10.6903 | 14.4534 | -0.7957 |
| YRI | PRR20A | 57024061 | 10.1309 | 12.1005 | -0.4928 |
| YRI | PRR20A | 57029061 | 10.0342 | 10.756  | -0.2017 |
| YRI | PRR20A | 57034061 | 13.9876 | 12.1005 | 0.4721  |
| YRI | PRR20A | 57039061 | 16.0183 | 13.1089 | 0.6749  |
| YRI | PRR20A | 57044061 | 9.5504  | 9.7476  | -0.0604 |

## 2\_TajimasD\_data

|     |        |          |         |         |         |
|-----|--------|----------|---------|---------|---------|
| YRI | PRR20A | 57049061 | 6.4546  | 8.4031  | -0.6848 |
| YRI | PRR20A | 57054061 | 13.2298 | 11.4282 | 0.4756  |
| YRI | PRR20A | 57059061 | 13.8293 | 11.9324 | 0.4809  |
| YRI | PRR20A | 57064061 | 9.359   | 9.9157  | -0.1678 |
| YRI | PRR20A | 57069061 | 9.5993  | 11.0921 | -0.4053 |
| YRI | PRR20A | 57074061 | 10.3063 | 11.7644 | -0.3746 |
| YRI | PRR20A | 57079061 | 13.9202 | 12.2685 | 0.4079  |
| YRI | PRR20A | 57084061 | 13.2121 | 12.2685 | 0.233   |
| YRI | PRR20A | 57089061 | 14.3747 | 12.7727 | 0.3809  |
| YRI | PRR20A | 57094061 | 15.6574 | 13.445  | 0.501   |
| YRI | PRR20A | 57099061 | 12.1439 | 11.4282 | 0.1889  |
| YRI | PRR20A | 57104061 | 16.3406 | 11.5963 | 1.2354  |
| YRI | PRR20A | 57109061 | 16.4042 | 11.9324 | 1.1336  |
| YRI | PRR20A | 57114061 | 10.7312 | 10.0837 | 0.1922  |
| YRI | PRR20A | 57119061 | 5.7985  | 9.5795  | -1.1771 |
| YRI | PRR20A | 57124061 | 4.0506  | 8.9073  | -1.6176 |
| YRI | PRR20A | 57129061 | 5.5985  | 9.4115  | -1.2068 |
| YRI | PRR20A | 57134061 | 4.6501  | 9.0754  | -1.4486 |
| YRI | PRR20A | 57139061 | 3.0583  | 7.7309  | -1.7729 |
| YRI | PRR20A | 57144061 | 3.8101  | 7.5628  | -1.4528 |
| YRI | PRR20A | 57149061 | 5.8439  | 7.8989  | -0.7645 |
| YRI | PRR20A | 57154061 | 5.442   | 9.2434  | -1.2234 |
| YRI | PRR20A | 57159061 | 3.4138  | 8.067   | -1.698  |
| YRI | PRR20A | 57164061 | 5.3793  | 10.0837 | -1.3963 |
| YRI | PRR20A | 57169061 | 7.2978  | 12.4366 | -1.2528 |
| YRI | PRR20A | 57174061 | 5.6135  | 10.0837 | -1.3268 |
| YRI | PRR20A | 57179061 | 5.4035  | 9.4115  | -1.2685 |
| YRI | PRR20A | 57184061 | 4.1913  | 8.5712  | -1.5115 |
| YRI | PRR20A | 57189061 | 3.6133  | 8.4031  | -1.6834 |
| YRI | PRR20A | 57194061 | 5.949   | 10.2518 | -1.2576 |
| YRI | PRR20A | 57199061 | 6.12    | 10.924  | -1.3231 |
| YRI | PRR20A | 57204061 | 4.2212  | 10.4199 | -1.7844 |
| YRI | PRR20A | 57209061 | 5.7806  | 11.2602 | -1.4669 |
| YRI | PRR20A | 57214061 | 5.5343  | 9.2434  | -1.1937 |
| YRI | PRR20A | 57219061 | 4.0267  | 6.8906  | -1.2068 |
| YRI | PRR20A | 57224061 | 4.3612  | 9.5795  | -1.6246 |
| YRI | PRR20A | 57229061 | 4.2033  | 10.2518 | -1.7678 |
| YRI | PRR20A | 57234061 | 3.432   | 7.7309  | -1.6311 |
| YRI | PRR20A | 57239061 | 3.5001  | 6.3864  | -1.3027 |
| YRI | PRR20A | 57244061 | 5.4354  | 6.3864  | -0.4292 |
| YRI | PRR20A | 57249061 | 4.6622  | 7.0586  | -0.9879 |
| YRI | PRR20A | 57254061 | 3.902   | 7.3947  | -1.3802 |
| YRI | PRR20A | 57259061 | 4.1977  | 7.7309  | -1.3406 |
| YRI | PRR20A | 57264061 | 4.1012  | 8.7392  | -1.5722 |
| YRI | PRR20A | 57269061 | 4.0139  | 8.5712  | -1.5727 |
| YRI | PRR20A | 57274061 | 3.5823  | 8.5712  | -1.7217 |
| YRI | PRR20A | 57279061 | 4.7687  | 9.0754  | -1.4098 |
| YRI | PRR20A | 57284061 | 4.4234  | 7.2267  | -1.1312 |
| YRI | PRR20A | 57289061 | 2.551   | 6.0502  | -1.6579 |

## 2\_TajimasD\_data

|     |        |          |        |         |         |
|-----|--------|----------|--------|---------|---------|
| YRI | PRR20A | 57294061 | 3.7481 | 7.3947  | -1.441  |
| YRI | PRR20A | 57299061 | 5.1097 | 7.2267  | -0.8543 |
| YRI | PRR20A | 57304061 | 3.9676 | 6.0502  | -0.9867 |
| YRI | PRR20A | 57309061 | 3.571  | 6.7225  | -1.358  |
| YRI | PRR20A | 57314061 | 4.7359 | 8.4031  | -1.2889 |
| YRI | PRR20A | 57319061 | 4.5723 | 8.067   | -1.2752 |
| YRI | PRR20A | 57324061 | 4.8711 | 8.4031  | -1.2414 |
| YRI | PRR20A | 57329061 | 5.2851 | 7.7309  | -0.928  |
| YRI | PRR20A | 57334061 | 4.6295 | 7.5628  | -1.1356 |
| YRI | PRR20A | 57339061 | 6.006  | 9.9157  | -1.1788 |
| YRI | PRR20A | 57344061 | 7.1347 | 9.9157  | -0.8385 |
| YRI | PRR20A | 57349061 | 7.1031 | 8.7392  | -0.5546 |
| YRI | PRR20A | 57354061 | 8.0486 | 8.9073  | -0.286  |
| YRI | PRR20A | 57359061 | 5.1857 | 7.2267  | -0.8236 |
| YRI | PRR20A | 57364061 | 2.6069 | 5.7141  | -1.5494 |
| YRI | PRR20A | 57369061 | 3.5768 | 7.0586  | -1.4354 |
| YRI | PRR20A | 57374061 | 3.9062 | 8.4031  | -1.5805 |
| YRI | PRR20A | 57379061 | 4.734  | 8.235   | -1.2536 |
| YRI | PRR20A | 57384061 | 3.357  | 6.2183  | -1.3228 |
| YRI | PRR20A | 57389061 | 4.7394 | 8.4031  | -1.2876 |
| YRI | PRR20A | 57394061 | 8.4746 | 10.924  | -0.6746 |
| YRI | PRR20A | 57399061 | 7.5281 | 9.5795  | -0.6387 |
| YRI | PRR20A | 57404061 | 7.0492 | 10.756  | -1.0359 |
| YRI | PRR20A | 57409061 | 7.3747 | 11.9324 | -1.1554 |
| YRI | PRR20A | 57414061 | 6.3519 | 9.9157  | -1.0745 |
| YRI | PRR20A | 57419061 | 6.3027 | 8.4031  | -0.7382 |
| YRI | PRR20A | 57424061 | 6.2627 | 7.5628  | -0.5033 |
| YRI | PRR20A | 57429061 | 5.199  | 8.4031  | -1.1261 |
| YRI | PRR20A | 57434061 | 4.9429 | 9.5795  | -1.4435 |
| YRI | PRR20A | 57439061 | 4.2611 | 8.9073  | -1.5475 |
| YRI | PRR20A | 57444061 | 7.6298 | 11.7644 | -1.0622 |
| YRI | PRR20A | 57449061 | 9.1652 | 12.2685 | -0.7664 |
| YRI | PRR20A | 57454061 | 6.9899 | 9.7476  | -0.8448 |
| YRI | PRR20A | 57459061 | 5.5015 | 8.9073  | -1.1343 |
| YRI | PRR20A | 57464061 | 4.3973 | 7.3947  | -1.1844 |
| YRI | PRR20A | 57469061 | 6.4602 | 7.8989  | -0.5352 |
| YRI | PRR20A | 57474061 | 5.7323 | 9.7476  | -1.23   |
| YRI | PRR20A | 57479061 | 5.0979 | 9.7476  | -1.4244 |
| YRI | PRR20A | 57484061 | 5.2182 | 7.5628  | -0.9077 |
| YRI | PRR20A | 57489061 | 4.5022 | 7.5628  | -1.1848 |
| YRI | PRR20A | 57494061 | 5.0262 | 8.9073  | -1.2926 |
| YRI | PRR20A | 57499061 | 5.9256 | 9.0754  | -1.0311 |
| YRI | PRR20A | 57504061 | 7.6872 | 9.2434  | -0.5008 |
| YRI | PRR20A | 57509061 | 6.8729 | 8.5712  | -0.5861 |
| YRI | PRR20A | 57514061 | 5.6559 | 7.8989  | -0.8344 |
| YRI | PRR20A | 57519061 | 7.6792 | 8.4031  | -0.2544 |
| YRI | PRR20A | 57524061 | 7.1211 | 9.2434  | -0.683  |
| YRI | PRR20A | 57529061 | 5.7902 | 11.5963 | -1.5119 |
| YRI | PRR20A | 57534061 | 6.9515 | 13.445  | -1.4706 |

## 2\_TajimasD\_data

|     |        |          |         |         |         |
|-----|--------|----------|---------|---------|---------|
| YRI | PRR20A | 57539061 | 7.2996  | 12.2685 | -1.2271 |
| YRI | PRR20A | 57544061 | 6.8568  | 11.2602 | -1.1788 |
| YRI | PRR20A | 57549061 | 6.6943  | 11.9324 | -1.3278 |
| YRI | PRR20A | 57554061 | 12.3087 | 16.302  | -0.7528 |
| YRI | PRR20A | 57559061 | 15.243  | 17.3104 | -0.368  |
| YRI | PRR20A | 57564061 | 12.8882 | 15.1256 | -0.4531 |
| YRI | PRR20A | 57569061 | 16.0591 | 15.7978 | 0.0508  |
| YRI | PRR20A | 57574061 | 15.4193 | 14.6214 | 0.1669  |
| YRI | PRR20A | 57579061 | 12.6211 | 12.9408 | -0.0751 |
| YRI | PRR20A | 57584061 | 12.6121 | 11.5963 | 0.2645  |
| YRI | PRR20A | 57589061 | 9.4182  | 10.924  | -0.4147 |
| YRI | PRR20A | 57594061 | 8.6749  | 11.0921 | -0.6563 |
| YRI | PRR20A | 57599061 | 11.3921 | 11.4282 | -0.0095 |
| YRI | PRR20A | 57604061 | 11.7274 | 12.2685 | -0.1336 |
| YRI | PRR20A | 57609061 | 9.0235  | 12.6047 | -0.8621 |
| YRI | PRR20A | 57614061 | 8.7001  | 12.9408 | -0.9958 |
| YRI | PRR20A | 57619061 | 7.2106  | 10.5879 | -0.9578 |
| YRI | PRR20A | 57624061 | 4.0331  | 8.9073  | -1.6234 |
| YRI | PRR20A | 57629061 | 4.4756  | 9.2434  | -1.5344 |
| YRI | PRR20A | 57634061 | 7.3446  | 9.7476  | -0.7361 |
| YRI | PRR20A | 57639061 | 8.6523  | 10.0837 | -0.4249 |
| YRI | PRR20A | 57644061 | 6.0694  | 9.5795  | -1.0928 |
| YRI | PRR20A | 57649061 | 6.9878  | 11.2602 | -1.1437 |
| CEU | PRR20A | 56665632 | 11.8683 | 9.7221  | 0.6632  |
| CEU | PRR20A | 56670632 | 13.2766 | 10.5749 | 0.7719  |
| CEU | PRR20A | 56675632 | 13.4275 | 10.5749 | 0.815   |
| CEU | PRR20A | 56680632 | 11.6986 | 8.187   | 1.2722  |
| CEU | PRR20A | 56685632 | 12.3904 | 12.6216 | -0.0559 |
| CEU | PRR20A | 56690632 | 9.8343  | 14.1567 | -0.938  |
| CEU | PRR20A | 56695632 | 5.3859  | 8.6987  | -1.1349 |
| CEU | PRR20A | 56700632 | 3.5896  | 6.4814  | -1.2961 |
| CEU | PRR20A | 56705632 | 3.5788  | 5.7991  | -1.0997 |
| CEU | PRR20A | 56710632 | 4.14    | 4.7757  | -0.3739 |
| CEU | PRR20A | 56715632 | 3.8159  | 6.4814  | -1.1947 |
| CEU | PRR20A | 56720632 | 3.7438  | 6.9931  | -1.3596 |
| CEU | PRR20A | 56725632 | 3.5591  | 5.1169  | -0.8623 |
| CEU | PRR20A | 56730632 | 4.0254  | 4.9463  | -0.5252 |
| CEU | PRR20A | 56735632 | 4.4972  | 4.0935  | 0.2715  |
| CEU | PRR20A | 56740632 | 2.9964  | 2.8996  | 0.0871  |
| CEU | PRR20A | 56745632 | 2.022   | 4.2641  | -1.4554 |
| CEU | PRR20A | 56750632 | 3.1189  | 5.2874  | -1.166  |
| CEU | PRR20A | 56755632 | 2.5865  | 4.2641  | -1.089  |
| CEU | PRR20A | 56760632 | 3.6782  | 5.9697  | -1.1059 |
| CEU | PRR20A | 56765632 | 5.6021  | 7.6753  | -0.7969 |
| CEU | PRR20A | 56770632 | 5.2888  | 6.1402  | -0.4006 |
| CEU | PRR20A | 56775632 | 4.7949  | 5.458   | -0.3467 |
| CEU | PRR20A | 56780632 | 4.3964  | 6.4814  | -0.9345 |
| CEU | PRR20A | 56785632 | 4.3072  | 6.1402  | -0.8626 |
| CEU | PRR20A | 56790632 | 3.8765  | 4.9463  | -0.6101 |

## 2\_TajimasD\_data

|     |        |          |         |         |         |
|-----|--------|----------|---------|---------|---------|
| CEU | PRR20A | 56795632 | 5.3179  | 6.6519  | -0.5841 |
| CEU | PRR20A | 56800632 | 8.2428  | 8.8692  | -0.2108 |
| CEU | PRR20A | 56805632 | 8.6821  | 8.5281  | 0.0537  |
| CEU | PRR20A | 56810632 | 7.6347  | 7.8459  | -0.0796 |
| CEU | PRR20A | 56815632 | 5.7203  | 6.6519  | -0.4079 |
| CEU | PRR20A | 56820632 | 7.8985  | 7.8459  | 0.0198  |
| CEU | PRR20A | 56825632 | 7.6367  | 8.0164  | -0.1402 |
| CEU | PRR20A | 56830632 | 8.0787  | 6.9931  | 0.4542  |
| CEU | PRR20A | 56835632 | 11.2214 | 9.5515  | 0.5246  |
| CEU | PRR20A | 56840632 | 9.8947  | 9.2104  | 0.2224  |
| CEU | PRR20A | 56845632 | 8.1701  | 7.1636  | 0.412   |
| CEU | PRR20A | 56850632 | 5.1179  | 8.187   | -1.1119 |
| CEU | PRR20A | 56855632 | 4.7829  | 8.187   | -1.2332 |
| CEU | PRR20A | 56860632 | 4.9363  | 5.6286  | -0.3521 |
| CEU | PRR20A | 56865632 | 3.2843  | 5.458   | -1.1364 |
| CEU | PRR20A | 56870632 | 1.913   | 4.6052  | -1.6346 |
| CEU | PRR20A | 56875632 | 1.3896  | 3.7524  | -1.7118 |
| CEU | PRR20A | 56880632 | 2.8091  | 5.1169  | -1.2774 |
| CEU | PRR20A | 56885632 | 3.4018  | 5.1169  | -0.9493 |
| CEU | PRR20A | 56890632 | 2.9586  | 5.7991  | -1.4069 |
| CEU | PRR20A | 56895632 | 3.241   | 7.3342  | -1.64   |
| CEU | PRR20A | 56900632 | 3.2542  | 6.1402  | -1.3581 |
| CEU | PRR20A | 56905632 | 3.1287  | 4.2641  | -0.737  |
| CEU | PRR20A | 56910632 | 2.2891  | 5.1169  | -1.5652 |
| CEU | PRR20A | 56915632 | 5.1744  | 10.4043 | -1.5172 |
| CEU | PRR20A | 56920632 | 6.8868  | 11.0866 | -1.148  |
| CEU | PRR20A | 56925632 | 4.7015  | 8.6987  | -1.3694 |
| CEU | PRR20A | 56930632 | 3.0406  | 7.1636  | -1.6878 |
| CEU | PRR20A | 56935632 | 2.5469  | 5.458   | -1.5219 |
| CEU | PRR20A | 56940632 | 5.4261  | 7.3342  | -0.7645 |
| CEU | PRR20A | 56945632 | 7.0759  | 8.5281  | -0.5067 |
| CEU | PRR20A | 56950632 | 7.1934  | 11.5982 | -1.1541 |
| CEU | PRR20A | 56955632 | 5.6543  | 10.5749 | -1.4059 |
| CEU | PRR20A | 56960632 | 4.5793  | 6.9931  | -1.01   |
| CEU | PRR20A | 56965632 | 5.2966  | 7.5047  | -0.8664 |
| CEU | PRR20A | 56970632 | 4.5811  | 7.5047  | -1.1471 |
| CEU | PRR20A | 56975632 | 5.1391  | 7.8459  | -1.0197 |
| CEU | PRR20A | 56980632 | 4.818   | 6.9931  | -0.9101 |
| CEU | PRR20A | 56985632 | 4.7514  | 6.9931  | -0.938  |
| CEU | PRR20A | 56990632 | 7.8229  | 8.6987  | -0.3    |
| CEU | PRR20A | 56995632 | 7.3785  | 7.3342  | 0.0177  |
| CEU | PRR20A | 57000632 | 4.8497  | 5.9697  | -0.5405 |
| CEU | PRR20A | 57005632 | 4.733   | 6.1402  | -0.6622 |
| CEU | PRR20A | 57010632 | 6.1736  | 6.3108  | -0.063  |
| CEU | PRR20A | 57015632 | 9.3521  | 8.6987  | 0.2239  |
| CEU | PRR20A | 57020632 | 8.9126  | 8.187   | 0.2629  |
| CEU | PRR20A | 57025632 | 8.6087  | 8.0164  | 0.2188  |
| CEU | PRR20A | 57030632 | 12.5506 | 10.0632 | 0.7444  |
| CEU | PRR20A | 57035632 | 16.6636 | 10.5749 | 1.7396  |



## 2\_TajimasD\_data

|     |        |          |         |         |         |
|-----|--------|----------|---------|---------|---------|
| CEU | PRR20A | 57040632 | 14.0917 | 9.7221  | 1.3503  |
| CEU | PRR20A | 57045632 | 7.0161  | 6.9931  | 0.0096  |
| CEU | PRR20A | 57050632 | 9.5916  | 7.8459  | 0.6576  |
| CEU | PRR20A | 57055632 | 12.7419 | 9.3809  | 1.0737  |
| CEU | PRR20A | 57060632 | 9.1948  | 7.6753  | 0.5841  |
| CEU | PRR20A | 57065632 | 6.1204  | 6.1402  | -0.0093 |
| CEU | PRR20A | 57070632 | 8.9822  | 7.5047  | 0.5797  |
| CEU | PRR20A | 57075632 | 12.984  | 10.0632 | 0.8741  |
| CEU | PRR20A | 57080632 | 13.2831 | 10.4043 | 0.8351  |
| CEU | PRR20A | 57085632 | 12.8504 | 9.3809  | 1.1084  |
| CEU | PRR20A | 57090632 | 12.8043 | 9.2104  | 1.1678  |
| CEU | PRR20A | 57095632 | 12.4132 | 9.2104  | 1.0407  |
| CEU | PRR20A | 57100632 | 14.1643 | 9.0398  | 1.6943  |
| CEU | PRR20A | 57105632 | 15.704  | 8.8692  | 2.2999  |
| CEU | PRR20A | 57110632 | 12.4059 | 9.3809  | 0.9664  |
| CEU | PRR20A | 57115632 | 8.0367  | 8.6987  | -0.2268 |
| CEU | PRR20A | 57120632 | 4.8103  | 6.4814  | -0.749  |
| CEU | PRR20A | 57125632 | 5.7908  | 7.5047  | -0.6725 |
| CEU | PRR20A | 57130632 | 6.2266  | 6.6519  | -0.1862 |
| CEU | PRR20A | 57135632 | 4.6197  | 4.9463  | -0.1863 |
| CEU | PRR20A | 57140632 | 4.1629  | 5.458   | -0.677  |
| CEU | PRR20A | 57145632 | 3.6858  | 5.7991  | -1.0467 |
| CEU | PRR20A | 57150632 | 3.8831  | 7.3342  | -1.3828 |
| CEU | PRR20A | 57155632 | 5.2991  | 7.3342  | -0.8154 |
| CEU | PRR20A | 57160632 | 5.6627  | 5.9697  | -0.1482 |
| CEU | PRR20A | 57165632 | 5.0423  | 5.9697  | -0.4476 |
| CEU | PRR20A | 57170632 | 6.1519  | 6.9931  | -0.352  |
| CEU | PRR20A | 57175632 | 5.9804  | 7.6753  | -0.6515 |
| CEU | PRR20A | 57180632 | 6.2727  | 8.5281  | -0.7869 |
| CEU | PRR20A | 57185632 | 4.7277  | 6.9931  | -0.9479 |
| CEU | PRR20A | 57190632 | 3.2995  | 6.6519  | -1.4677 |
| CEU | PRR20A | 57195632 | 3.967   | 6.8225  | -1.2219 |
| CEU | PRR20A | 57200632 | 4.0367  | 6.8225  | -1.192  |
| CEU | PRR20A | 57205632 | 6.3214  | 7.8459  | -0.5743 |
| CEU | PRR20A | 57210632 | 6.5345  | 6.8225  | -0.1232 |
| CEU | PRR20A | 57215632 | 4.236   | 6.1402  | -0.8961 |
| CEU | PRR20A | 57220632 | 3.4121  | 5.1169  | -0.9436 |
| CEU | PRR20A | 57225632 | 3.7666  | 4.9463  | -0.6728 |
| CEU | PRR20A | 57230632 | 2.422   | 5.9697  | -1.7122 |
| CEU | PRR20A | 57235632 | 2.0526  | 5.458   | -1.7803 |
| CEU | PRR20A | 57240632 | 3.7972  | 5.458   | -0.8682 |
| CEU | PRR20A | 57245632 | 3.849   | 5.9697  | -1.0235 |
| CEU | PRR20A | 57250632 | 4.453   | 5.7991  | -0.6667 |
| CEU | PRR20A | 57255632 | 4.0122  | 4.9463  | -0.5327 |
| CEU | PRR20A | 57260632 | 2.6893  | 4.7757  | -1.2271 |
| CEU | PRR20A | 57265632 | 4.4747  | 6.1402  | -0.7837 |
| CEU | PRR20A | 57270632 | 5.3241  | 6.1402  | -0.384  |
| CEU | PRR20A | 57275632 | 4.6918  | 8.187   | -1.2662 |
| CEU | PRR20A | 57280632 | 4.4928  | 8.187   | -1.3383 |

## 2\_TajimasD\_data

|     |        |          |        |        |         |
|-----|--------|----------|--------|--------|---------|
| CEU | PRR20A | 57285632 | 3.1529 | 4.2641 | -0.7213 |
| CEU | PRR20A | 57290632 | 1.3929 | 3.7524 | -1.7094 |
| CEU | PRR20A | 57295632 | 3.3944 | 5.9697 | -1.2429 |
| CEU | PRR20A | 57300632 | 3.0796 | 5.9697 | -1.3948 |
| CEU | PRR20A | 57305632 | 2.3737 | 6.1402 | -1.7724 |
| CEU | PRR20A | 57310632 | 4.2323 | 6.9931 | -1.1552 |
| CEU | PRR20A | 57315632 | 4.9522 | 6.3108 | -0.6238 |
| CEU | PRR20A | 57320632 | 5.3261 | 6.1402 | -0.3831 |
| CEU | PRR20A | 57325632 | 5.5702 | 6.6519 | -0.4736 |
| CEU | PRR20A | 57330632 | 6.1453 | 8.187  | -0.7397 |
| CEU | PRR20A | 57335632 | 4.8629 | 7.6753 | -1.081  |
| CEU | PRR20A | 57340632 | 4.5613 | 5.7991 | -0.6131 |
| CEU | PRR20A | 57345632 | 5.8277 | 5.7991 | 0.0142  |
| CEU | PRR20A | 57350632 | 6.8695 | 6.6519 | 0.0953  |
| CEU | PRR20A | 57355632 | 7.6401 | 6.8225 | 0.3498  |
| CEU | PRR20A | 57360632 | 5.8877 | 6.9931 | -0.4625 |
| CEU | PRR20A | 57365632 | 2.309  | 5.1169 | -1.5542 |
| CEU | PRR20A | 57370632 | 2.5248 | 5.2874 | -1.4855 |
| CEU | PRR20A | 57375632 | 4.7229 | 6.8225 | -0.8984 |
| CEU | PRR20A | 57380632 | 3.9235 | 5.458  | -0.8022 |
| CEU | PRR20A | 57385632 | 3.2311 | 6.4814 | -1.4568 |
| CEU | PRR20A | 57390632 | 3.8487 | 7.3342 | -1.3965 |
| CEU | PRR20A | 57395632 | 6.3307 | 7.1636 | -0.3409 |
| CEU | PRR20A | 57400632 | 7.0381 | 7.8459 | -0.3043 |
| CEU | PRR20A | 57405632 | 5.7333 | 7.5047 | -0.695  |
| CEU | PRR20A | 57410632 | 7.1424 | 6.3108 | 0.3818  |
| CEU | PRR20A | 57415632 | 6.1194 | 5.1169 | 0.5549  |
| CEU | PRR20A | 57420632 | 2.6401 | 4.0935 | -0.9773 |
| CEU | PRR20A | 57425632 | 4.0408 | 5.6286 | -0.8077 |
| CEU | PRR20A | 57430632 | 5.6069 | 6.6519 | -0.4575 |
| CEU | PRR20A | 57435632 | 4.4929 | 5.2874 | -0.4272 |
| CEU | PRR20A | 57440632 | 4.4914 | 5.7991 | -0.6477 |
| CEU | PRR20A | 57445632 | 6.5485 | 6.6519 | -0.0453 |
| CEU | PRR20A | 57450632 | 7.149  | 6.9931 | 0.0652  |
| CEU | PRR20A | 57455632 | 5.1929 | 7.3342 | -0.858  |
| CEU | PRR20A | 57460632 | 5.3284 | 6.6519 | -0.5795 |
| CEU | PRR20A | 57465632 | 5.0346 | 4.6052 | 0.2607  |
| CEU | PRR20A | 57470632 | 5.7358 | 4.9463 | 0.4503  |
| CEU | PRR20A | 57475632 | 4.8315 | 6.9931 | -0.9045 |
| CEU | PRR20A | 57480632 | 3.4393 | 6.3108 | -1.3184 |
| CEU | PRR20A | 57485632 | 5.3496 | 5.2874 | 0.0334  |
| CEU | PRR20A | 57490632 | 5.2785 | 5.6286 | -0.1781 |
| CEU | PRR20A | 57495632 | 3.1688 | 5.458  | -1.1967 |
| CEU | PRR20A | 57500632 | 2.6512 | 5.6286 | -1.5145 |
| CEU | PRR20A | 57505632 | 5.2754 | 7.1636 | -0.7729 |
| CEU | PRR20A | 57510632 | 6.0744 | 6.6519 | -0.2528 |
| CEU | PRR20A | 57515632 | 4.0864 | 5.6286 | -0.7845 |
| CEU | PRR20A | 57520632 | 3.9598 | 5.7991 | -0.911  |
| CEU | PRR20A | 57525632 | 4.0443 | 5.6286 | -0.8059 |

## 2\_TajimasD\_data

|     |        |          |         |         |         |
|-----|--------|----------|---------|---------|---------|
| CEU | PRR20A | 57530632 | 2.0484  | 3.7524  | -1.2345 |
| CEU | PRR20A | 57535632 | 1.9988  | 3.2407  | -1.0183 |
| CEU | PRR20A | 57540632 | 2.4844  | 4.0935  | -1.082  |
| CEU | PRR20A | 57545632 | 1.5147  | 3.4112  | -1.4895 |
| CEU | PRR20A | 57550632 | 3.6784  | 5.7991  | -1.0504 |
| CEU | PRR20A | 57555632 | 15.097  | 11.2571 | 1.0347  |
| CEU | PRR20A | 57560632 | 18.675  | 12.1099 | 1.6516  |
| CEU | PRR20A | 57565632 | 15.1849 | 11.7688 | 0.8828  |
| CEU | PRR20A | 57570632 | 17.087  | 12.9627 | 0.973   |
| CEU | PRR20A | 57575632 | 14.3482 | 11.2571 | 0.8329  |
| CEU | PRR20A | 57580632 | 14.2346 | 10.7454 | 0.9821  |
| CEU | PRR20A | 57585632 | 16.0653 | 9.8926  | 1.8769  |
| CEU | PRR20A | 57590632 | 13.9497 | 9.0398  | 1.6233  |
| CEU | PRR20A | 57595632 | 13.2061 | 9.5515  | 1.1481  |
| CEU | PRR20A | 57600632 | 16.3364 | 10.2337 | 1.7979  |
| CEU | PRR20A | 57605632 | 16.2341 | 9.5515  | 2.0994  |
| CEU | PRR20A | 57610632 | 12.6385 | 7.8459  | 1.8054  |
| CEU | PRR20A | 57615632 | 12.7106 | 9.2104  | 1.1374  |
| CEU | PRR20A | 57620632 | 10.091  | 8.5281  | 0.5453  |
| CEU | PRR20A | 57625632 | 6.3252  | 6.9931  | -0.2795 |
| CEU | PRR20A | 57630632 | 7.2177  | 7.3342  | -0.0467 |
| CEU | PRR20A | 57635632 | 11.9386 | 8.6987  | 1.11    |
| CEU | PRR20A | 57640632 | 11.3663 | 8.8692  | 0.8403  |
| CEU | PRR20A | 57645632 | 9.4026  | 8.3576  | 0.3715  |
| CEU | PRR20A | 57650632 | 15.2971 | 11.5982 | 0.9691  |
| CEU | PRR20A | 57655632 | 19.2806 | 13.4744 | 1.3205  |
| CHB | PRR20A | 56665632 | 11.8685 | 9.4872  | 0.7506  |
| CHB | PRR20A | 56670632 | 12.9834 | 10.5037 | 0.7109  |
| CHB | PRR20A | 56675632 | 12.6166 | 10.5037 | 0.6058  |
| CHB | PRR20A | 56680632 | 10.7615 | 8.6402  | 0.7292  |
| CHB | PRR20A | 56685632 | 13.4335 | 15.0779 | -0.3351 |
| CHB | PRR20A | 56690632 | 11.2024 | 17.1109 | -1.067  |
| CHB | PRR20A | 56695632 | 4.7628  | 10.1649 | -1.5969 |
| CHB | PRR20A | 56700632 | 3.379   | 6.2684  | -1.3308 |
| CHB | PRR20A | 56705632 | 4.5568  | 7.7931  | -1.2232 |
| CHB | PRR20A | 56710632 | 4.8117  | 8.8096  | -1.3498 |
| CHB | PRR20A | 56715632 | 4.1536  | 9.3178  | -1.6553 |
| CHB | PRR20A | 56720632 | 4.7769  | 10.8426 | -1.6881 |
| CHB | PRR20A | 56725632 | 3.8378  | 8.979   | -1.7055 |
| CHB | PRR20A | 56730632 | 3.422   | 9.8261  | -1.9539 |
| CHB | PRR20A | 56735632 | 4.8498  | 11.5202 | -1.7538 |
| CHB | PRR20A | 56740632 | 3.6863  | 9.4872  | -1.8286 |
| CHB | PRR20A | 56745632 | 2.7759  | 9.3178  | -2.0969 |
| CHB | PRR20A | 56750632 | 3.8317  | 9.4872  | -1.7827 |
| CHB | PRR20A | 56755632 | 3.6465  | 7.6237  | -1.5337 |
| CHB | PRR20A | 56760632 | 3.2762  | 7.1154  | -1.5766 |
| CHB | PRR20A | 56765632 | 3.7628  | 7.7931  | -1.5232 |
| CHB | PRR20A | 56770632 | 4.1184  | 8.3013  | -1.4918 |
| CHB | PRR20A | 56775632 | 3.423   | 9.6567  | -1.9329 |

## 2\_TajimasD\_data

|     |        |          |        |        |         |
|-----|--------|----------|--------|--------|---------|
| CHB | PRR20A | 56780632 | 3.363  | 9.1484 | -1.8863 |
| CHB | PRR20A | 56785632 | 3.695  | 7.6237 | -1.515  |
| CHB | PRR20A | 56790632 | 3.178  | 7.6237 | -1.7144 |
| CHB | PRR20A | 56795632 | 3.6933 | 8.8096 | -1.7274 |
| CHB | PRR20A | 56800632 | 6.2983 | 9.9955 | -1.1102 |
| CHB | PRR20A | 56805632 | 7.7521 | 9.4872 | -0.5469 |
| CHB | PRR20A | 56810632 | 6.487  | 8.6402 | -0.7401 |
| CHB | PRR20A | 56815632 | 4.1357 | 8.4708 | -1.5176 |
| CHB | PRR20A | 56820632 | 6.8195 | 9.6567 | -0.8798 |
| CHB | PRR20A | 56825632 | 7.5713 | 9.6567 | -0.6466 |
| CHB | PRR20A | 56830632 | 7.5917 | 8.979  | -0.4602 |
| CHB | PRR20A | 56835632 | 8.9585 | 8.4708 | 0.1707  |
| CHB | PRR20A | 56840632 | 8.8258 | 8.3013 | 0.1871  |
| CHB | PRR20A | 56845632 | 8.1734 | 9.1484 | -0.3179 |
| CHB | PRR20A | 56850632 | 6.0274 | 8.6402 | -0.8981 |
| CHB | PRR20A | 56855632 | 5.2507 | 6.6072 | -0.5958 |
| CHB | PRR20A | 56860632 | 4.8759 | 6.946  | -0.8689 |
| CHB | PRR20A | 56865632 | 4.2549 | 6.7766 | -1.0825 |
| CHB | PRR20A | 56870632 | 2.3069 | 4.913  | -1.4907 |
| CHB | PRR20A | 56875632 | 1.8216 | 4.913  | -1.7683 |
| CHB | PRR20A | 56880632 | 2.993  | 5.5907 | -1.3254 |
| CHB | PRR20A | 56885632 | 2.7028 | 4.913  | -1.2642 |
| CHB | PRR20A | 56890632 | 1.7101 | 5.4213 | -1.946  |
| CHB | PRR20A | 56895632 | 3.1525 | 7.2848 | -1.661  |
| CHB | PRR20A | 56900632 | 3.64   | 6.4378 | -1.258  |
| CHB | PRR20A | 56905632 | 2.6192 | 5.0825 | -1.3676 |
| CHB | PRR20A | 56910632 | 3.2636 | 6.4378 | -1.4272 |
| CHB | PRR20A | 56915632 | 5.7066 | 7.7931 | -0.7886 |
| CHB | PRR20A | 56920632 | 5.5374 | 7.2848 | -0.7024 |
| CHB | PRR20A | 56925632 | 3.1534 | 5.4213 | -1.1892 |
| CHB | PRR20A | 56930632 | 1.9162 | 4.066  | -1.4497 |
| CHB | PRR20A | 56935632 | 2.2739 | 4.913  | -1.5096 |
| CHB | PRR20A | 56940632 | 4.9619 | 6.2684 | -0.6017 |
| CHB | PRR20A | 56945632 | 5.7487 | 7.4543 | -0.6714 |
| CHB | PRR20A | 56950632 | 4.2147 | 8.3013 | -1.4575 |
| CHB | PRR20A | 56955632 | 3.4064 | 7.4543 | -1.5934 |
| CHB | PRR20A | 56960632 | 3.7737 | 6.6072 | -1.2445 |
| CHB | PRR20A | 56965632 | 4.8985 | 6.7766 | -0.8062 |
| CHB | PRR20A | 56970632 | 4.2568 | 6.6072 | -1.0323 |
| CHB | PRR20A | 56975632 | 4.4154 | 5.9295 | -0.733  |
| CHB | PRR20A | 56980632 | 4.0607 | 4.913  | -0.4875 |
| CHB | PRR20A | 56985632 | 3.4597 | 6.4378 | -1.3391 |
| CHB | PRR20A | 56990632 | 5.9903 | 8.8096 | -0.9519 |
| CHB | PRR20A | 56995632 | 6.3497 | 7.9625 | -0.5977 |
| CHB | PRR20A | 57000632 | 4.5481 | 5.5907 | -0.532  |
| CHB | PRR20A | 57005632 | 3.5302 | 4.913  | -0.791  |
| CHB | PRR20A | 57010632 | 5.3878 | 6.946  | -0.6541 |
| CHB | PRR20A | 57015632 | 7.9671 | 8.979  | -0.3357 |
| CHB | PRR20A | 57020632 | 7.0295 | 9.3178 | -0.7335 |

## 2\_TajimasD\_data

|     |        |          |         |        |         |
|-----|--------|----------|---------|--------|---------|
| CHB | PRR20A | 57025632 | 7.0246  | 8.1319 | -0.4025 |
| CHB | PRR20A | 57030632 | 9.96    | 9.3178 | 0.2058  |
| CHB | PRR20A | 57035632 | 13.2909 | 9.9955 | 0.9895  |
| CHB | PRR20A | 57040632 | 11.2393 | 9.1484 | 0.6817  |
| CHB | PRR20A | 57045632 | 5.2823  | 7.2848 | -0.8049 |
| CHB | PRR20A | 57050632 | 7.3984  | 6.6072 | 0.3475  |
| CHB | PRR20A | 57055632 | 10.1782 | 8.4708 | 0.5977  |
| CHB | PRR20A | 57060632 | 7.1928  | 7.7931 | -0.2269 |
| CHB | PRR20A | 57065632 | 4.8292  | 6.0989 | -0.5994 |
| CHB | PRR20A | 57070632 | 7.1864  | 6.946  | 0.1009  |
| CHB | PRR20A | 57075632 | 10.3409 | 8.3013 | 0.7274  |
| CHB | PRR20A | 57080632 | 10.6389 | 7.7931 | 1.0756  |
| CHB | PRR20A | 57085632 | 10.2256 | 7.9625 | 0.8386  |
| CHB | PRR20A | 57090632 | 9.5825  | 8.4708 | 0.3892  |
| CHB | PRR20A | 57095632 | 9.2724  | 8.1319 | 0.4145  |
| CHB | PRR20A | 57100632 | 11.2981 | 8.1319 | 1.1508  |
| CHB | PRR20A | 57105632 | 12.2332 | 8.6402 | 1.235   |
| CHB | PRR20A | 57110632 | 9.896   | 8.1319 | 0.6412  |
| CHB | PRR20A | 57115632 | 7.4425  | 6.7766 | 0.2858  |
| CHB | PRR20A | 57120632 | 4.281   | 4.913  | -0.3615 |
| CHB | PRR20A | 57125632 | 4.8389  | 4.7436 | 0.0562  |
| CHB | PRR20A | 57130632 | 5.8816  | 5.5907 | 0.1484  |
| CHB | PRR20A | 57135632 | 4.2391  | 5.0825 | -0.4682 |
| CHB | PRR20A | 57140632 | 3.7719  | 5.4213 | -0.8649 |
| CHB | PRR20A | 57145632 | 3.5292  | 6.0989 | -1.213  |
| CHB | PRR20A | 57150632 | 3.6785  | 6.6072 | -1.2863 |
| CHB | PRR20A | 57155632 | 4.3354  | 6.2684 | -0.8903 |
| CHB | PRR20A | 57160632 | 4.6297  | 5.5907 | -0.4903 |
| CHB | PRR20A | 57165632 | 4.9121  | 6.4378 | -0.686  |
| CHB | PRR20A | 57170632 | 5.7466  | 6.4378 | -0.3108 |
| CHB | PRR20A | 57175632 | 5.0748  | 5.5907 | -0.2632 |
| CHB | PRR20A | 57180632 | 5.4894  | 5.4213 | 0.0357  |
| CHB | PRR20A | 57185632 | 4.42    | 4.913  | -0.282  |
| CHB | PRR20A | 57190632 | 3.0129  | 4.4048 | -0.8759 |
| CHB | PRR20A | 57195632 | 4.0247  | 6.2684 | -1.0334 |
| CHB | PRR20A | 57200632 | 4.3284  | 6.946  | -1.0988 |
| CHB | PRR20A | 57205632 | 5.5762  | 6.7766 | -0.5153 |
| CHB | PRR20A | 57210632 | 6.0758  | 7.1154 | -0.4269 |
| CHB | PRR20A | 57215632 | 4.3908  | 5.4213 | -0.5404 |
| CHB | PRR20A | 57220632 | 3.368   | 4.7436 | -0.8114 |
| CHB | PRR20A | 57225632 | 4.2092  | 6.0989 | -0.892  |
| CHB | PRR20A | 57230632 | 3.2018  | 6.2684 | -1.4124 |
| CHB | PRR20A | 57235632 | 1.9497  | 4.4048 | -1.5449 |
| CHB | PRR20A | 57240632 | 2.9796  | 4.4048 | -0.8968 |
| CHB | PRR20A | 57245632 | 3.5492  | 4.5742 | -0.6241 |
| CHB | PRR20A | 57250632 | 4.3227  | 5.9295 | -0.7779 |
| CHB | PRR20A | 57255632 | 3.8787  | 6.0989 | -1.048  |
| CHB | PRR20A | 57260632 | 2.495   | 4.4048 | -1.2017 |
| CHB | PRR20A | 57265632 | 3.9199  | 6.7766 | -1.2263 |

## 2\_TajimasD\_data

|     |        |          |        |        |         |
|-----|--------|----------|--------|--------|---------|
| CHB | PRR20A | 57270632 | 4.8256 | 7.1154 | -0.9404 |
| CHB | PRR20A | 57275632 | 5.0063 | 6.946  | -0.8142 |
| CHB | PRR20A | 57280632 | 5.0316 | 6.946  | -0.8036 |
| CHB | PRR20A | 57285632 | 3.1018 | 4.913  | -1.036  |
| CHB | PRR20A | 57290632 | 1.217  | 3.3883 | -1.7099 |
| CHB | PRR20A | 57295632 | 3.4684 | 4.4048 | -0.5892 |
| CHB | PRR20A | 57300632 | 3.1217 | 4.7436 | -0.9567 |
| CHB | PRR20A | 57305632 | 2.1333 | 4.4048 | -1.4293 |
| CHB | PRR20A | 57310632 | 3.9427 | 5.9295 | -0.9618 |
| CHB | PRR20A | 57315632 | 4.9117 | 5.7601 | -0.4215 |
| CHB | PRR20A | 57320632 | 5.3286 | 5.7601 | -0.2144 |
| CHB | PRR20A | 57325632 | 5.6874 | 6.6072 | -0.404  |
| CHB | PRR20A | 57330632 | 6.6792 | 6.7766 | -0.0418 |
| CHB | PRR20A | 57335632 | 5.2541 | 7.4543 | -0.8661 |
| CHB | PRR20A | 57340632 | 4.5346 | 7.6237 | -1.1912 |
| CHB | PRR20A | 57345632 | 6.2111 | 6.4378 | -0.1019 |
| CHB | PRR20A | 57350632 | 7.6747 | 6.6072 | 0.4689  |
| CHB | PRR20A | 57355632 | 8.3946 | 7.2848 | 0.4461  |
| CHB | PRR20A | 57360632 | 6.426  | 5.5907 | 0.4262  |
| CHB | PRR20A | 57365632 | 2.8624 | 4.7436 | -1.1097 |
| CHB | PRR20A | 57370632 | 2.981  | 6.6072 | -1.5927 |
| CHB | PRR20A | 57375632 | 4.8504 | 6.7766 | -0.8268 |
| CHB | PRR20A | 57380632 | 3.8544 | 4.7436 | -0.5245 |
| CHB | PRR20A | 57385632 | 2.2469 | 3.8965 | -1.1538 |
| CHB | PRR20A | 57390632 | 3.8795 | 5.9295 | -0.9924 |
| CHB | PRR20A | 57395632 | 7.6046 | 9.3178 | -0.5491 |
| CHB | PRR20A | 57400632 | 7.5085 | 8.979  | -0.4878 |
| CHB | PRR20A | 57405632 | 5.6433 | 6.946  | -0.5468 |
| CHB | PRR20A | 57410632 | 6.7687 | 7.2848 | -0.2075 |
| CHB | PRR20A | 57415632 | 6.0788 | 6.7766 | -0.2995 |
| CHB | PRR20A | 57420632 | 3.2427 | 5.2519 | -1.0836 |
| CHB | PRR20A | 57425632 | 4.2075 | 6.0989 | -0.8928 |
| CHB | PRR20A | 57430632 | 5.6193 | 6.946  | -0.5569 |
| CHB | PRR20A | 57435632 | 4.4776 | 6.0989 | -0.7653 |
| CHB | PRR20A | 57440632 | 4.5022 | 5.7601 | -0.625  |
| CHB | PRR20A | 57445632 | 6.2939 | 6.2684 | 0.0117  |
| CHB | PRR20A | 57450632 | 6.3387 | 6.2684 | 0.0324  |
| CHB | PRR20A | 57455632 | 4.9893 | 6.7766 | -0.7672 |
| CHB | PRR20A | 57460632 | 5.2412 | 7.2848 | -0.8215 |
| CHB | PRR20A | 57465632 | 4.9583 | 6.2684 | -0.6034 |
| CHB | PRR20A | 57470632 | 5.9617 | 7.4543 | -0.5875 |
| CHB | PRR20A | 57475632 | 4.8083 | 7.2848 | -0.9955 |
| CHB | PRR20A | 57480632 | 3.2886 | 5.7601 | -1.2279 |
| CHB | PRR20A | 57485632 | 5.2633 | 6.0989 | -0.3944 |
| CHB | PRR20A | 57490632 | 5.2513 | 5.7601 | -0.2528 |
| CHB | PRR20A | 57495632 | 3.3935 | 4.913  | -0.8691 |
| CHB | PRR20A | 57500632 | 3.4902 | 5.5907 | -1.0717 |
| CHB | PRR20A | 57505632 | 5.4209 | 6.4378 | -0.4572 |
| CHB | PRR20A | 57510632 | 5.6627 | 6.0989 | -0.2059 |

## 2\_TajimasD\_data

|     |        |          |         |         |         |
|-----|--------|----------|---------|---------|---------|
| CHB | PRR20A | 57515632 | 4.6966  | 6.4378  | -0.7829 |
| CHB | PRR20A | 57520632 | 4.8001  | 6.6072  | -0.7937 |
| CHB | PRR20A | 57525632 | 4.2901  | 6.4378  | -0.9657 |
| CHB | PRR20A | 57530632 | 2.5842  | 7.9625  | -1.993  |
| CHB | PRR20A | 57535632 | 2.4201  | 7.7931  | -2.0307 |
| CHB | PRR20A | 57540632 | 2.6176  | 8.1319  | -2.0043 |
| CHB | PRR20A | 57545632 | 2.0868  | 9.4872  | -2.3328 |
| CHB | PRR20A | 57550632 | 3.4786  | 8.3013  | -1.72   |
| CHB | PRR20A | 57555632 | 13.0409 | 11.5202 | 0.3998  |
| CHB | PRR20A | 57560632 | 18.3851 | 13.3838 | 1.1414  |
| CHB | PRR20A | 57565632 | 16.6741 | 11.6896 | 1.2926  |
| CHB | PRR20A | 57570632 | 18.3665 | 12.3673 | 1.4753  |
| CHB | PRR20A | 57575632 | 15.731  | 10.6731 | 1.4285  |
| CHB | PRR20A | 57580632 | 15.7723 | 9.9955  | 1.7347  |
| CHB | PRR20A | 57585632 | 17.5267 | 11.8591 | 1.45    |
| CHB | PRR20A | 57590632 | 14.2058 | 11.012  | 0.876   |
| CHB | PRR20A | 57595632 | 12.423  | 9.8261  | 0.7923  |
| CHB | PRR20A | 57600632 | 15.6185 | 11.1814 | 1.1998  |
| CHB | PRR20A | 57605632 | 16.0628 | 11.5202 | 1.1943  |
| CHB | PRR20A | 57610632 | 12.7822 | 9.6567  | 0.9692  |
| CHB | PRR20A | 57615632 | 13.6206 | 9.1484  | 1.4581  |
| CHB | PRR20A | 57620632 | 10.3522 | 7.6237  | 1.0522  |
| CHB | PRR20A | 57625632 | 6.7285  | 6.0989  | 0.2972  |
| CHB | PRR20A | 57630632 | 7.9903  | 6.6072  | 0.6075  |
| CHB | PRR20A | 57635632 | 10.5285 | 8.3013  | 0.7943  |
| CHB | PRR20A | 57640632 | 9.6269  | 8.6402  | 0.3392  |
| CHB | PRR20A | 57645632 | 9.1633  | 7.4543  | 0.6727  |
| CHB | PRR20A | 57650632 | 14.4694 | 9.8261  | 1.4167  |
| CHB | PRR20A | 57655632 | 18.6937 | 11.8591 | 1.7486  |
| YRI | PRR20A | 56665632 | 15.4496 | 14.9575 | 0.1007  |
| YRI | PRR20A | 56670632 | 16.2104 | 16.9743 | -0.1386 |
| YRI | PRR20A | 56675632 | 14.3846 | 14.6214 | -0.0495 |
| YRI | PRR20A | 56680632 | 13.3493 | 12.4366 | 0.2225  |
| YRI | PRR20A | 56685632 | 24.898  | 22.3523 | 0.3543  |
| YRI | PRR20A | 56690632 | 21.6858 | 22.5203 | -0.1153 |
| YRI | PRR20A | 56695632 | 8.952   | 13.445  | -1.0175 |
| YRI | PRR20A | 56700632 | 8.2098  | 11.0921 | -0.7826 |
| YRI | PRR20A | 56705632 | 13.2608 | 12.9408 | 0.0751  |
| YRI | PRR20A | 56710632 | 17.1948 | 14.6214 | 0.5382  |
| YRI | PRR20A | 56715632 | 14.4924 | 14.4534 | 0.0082  |
| YRI | PRR20A | 56720632 | 11.4112 | 12.9408 | -0.3592 |
| YRI | PRR20A | 56725632 | 12.0103 | 11.7644 | 0.0632  |
| YRI | PRR20A | 56730632 | 16.9258 | 13.9492 | 0.651   |
| YRI | PRR20A | 56735632 | 16.479  | 15.1256 | 0.2741  |
| YRI | PRR20A | 56740632 | 9.9441  | 12.1005 | -0.5395 |
| YRI | PRR20A | 56745632 | 9.1514  | 11.5963 | -0.6367 |
| YRI | PRR20A | 56750632 | 10.6353 | 11.2602 | -0.1673 |
| YRI | PRR20A | 56755632 | 9.3891  | 10.5879 | -0.34   |
| YRI | PRR20A | 56760632 | 9.2619  | 13.445  | -0.9473 |

## 2\_TajimasD\_data

|     |        |          |         |         |         |
|-----|--------|----------|---------|---------|---------|
| YRI | PRR20A | 56765632 | 10.0461 | 13.9492 | -0.8536 |
| YRI | PRR20A | 56770632 | 11.8556 | 12.4366 | -0.1416 |
| YRI | PRR20A | 56775632 | 14.5321 | 13.445  | 0.2462  |
| YRI | PRR20A | 56780632 | 12.981  | 13.1089 | -0.0297 |
| YRI | PRR20A | 56785632 | 10.0016 | 11.4282 | -0.3766 |
| YRI | PRR20A | 56790632 | 10.594  | 11.5963 | -0.261  |
| YRI | PRR20A | 56795632 | 10.386  | 11.7644 | -0.3541 |
| YRI | PRR20A | 56800632 | 10.6512 | 12.2685 | -0.3994 |
| YRI | PRR20A | 56805632 | 9.6134  | 11.0921 | -0.4015 |
| YRI | PRR20A | 56810632 | 9.586   | 9.4115  | 0.0552  |
| YRI | PRR20A | 56815632 | 9.4245  | 8.235   | 0.4259  |
| YRI | PRR20A | 56820632 | 10.872  | 11.7644 | -0.2293 |
| YRI | PRR20A | 56825632 | 11.3238 | 13.1089 | -0.4141 |
| YRI | PRR20A | 56830632 | 11.7809 | 11.0921 | 0.187   |
| YRI | PRR20A | 56835632 | 12.6391 | 10.756  | 0.5262  |
| YRI | PRR20A | 56840632 | 10.9751 | 10.756  | 0.0612  |
| YRI | PRR20A | 56845632 | 11.168  | 11.9324 | -0.1938 |
| YRI | PRR20A | 56850632 | 9.5656  | 11.2602 | -0.4536 |
| YRI | PRR20A | 56855632 | 6.6924  | 10.2518 | -1.0403 |
| YRI | PRR20A | 56860632 | 6.8995  | 9.9157  | -0.9094 |
| YRI | PRR20A | 56865632 | 6.3081  | 9.7476  | -1.0536 |
| YRI | PRR20A | 56870632 | 4.5817  | 9.5795  | -1.556  |
| YRI | PRR20A | 56875632 | 3.9119  | 7.7309  | -1.449  |
| YRI | PRR20A | 56880632 | 3.6289  | 7.2267  | -1.4518 |
| YRI | PRR20A | 56885632 | 3.5991  | 7.0586  | -1.4262 |
| YRI | PRR20A | 56890632 | 4.1197  | 8.067   | -1.4404 |
| YRI | PRR20A | 56895632 | 5.7324  | 8.7392  | -1.0192 |
| YRI | PRR20A | 56900632 | 5.5566  | 6.8906  | -0.5621 |
| YRI | PRR20A | 56905632 | 4.882   | 6.5544  | -0.7373 |
| YRI | PRR20A | 56910632 | 4.9118  | 7.2267  | -0.9341 |
| YRI | PRR20A | 56915632 | 7.3053  | 9.2434  | -0.6237 |
| YRI | PRR20A | 56920632 | 8.3454  | 9.9157  | -0.4734 |
| YRI | PRR20A | 56925632 | 6.3917  | 8.9073  | -0.8378 |
| YRI | PRR20A | 56930632 | 4.725   | 8.235   | -1.2568 |
| YRI | PRR20A | 56935632 | 5.7304  | 9.4115  | -1.165  |
| YRI | PRR20A | 56940632 | 10.0332 | 12.1005 | -0.5172 |
| YRI | PRR20A | 56945632 | 10.0876 | 14.9575 | -0.9967 |
| YRI | PRR20A | 56950632 | 9.469   | 15.2937 | -1.1671 |
| YRI | PRR20A | 56955632 | 8.3288  | 11.7644 | -0.8826 |
| YRI | PRR20A | 56960632 | 5.2249  | 10.2518 | -1.4692 |
| YRI | PRR20A | 56965632 | 5.9848  | 10.0837 | -1.2166 |
| YRI | PRR20A | 56970632 | 6.5906  | 9.2434  | -0.8537 |
| YRI | PRR20A | 56975632 | 7.3659  | 9.7476  | -0.7296 |
| YRI | PRR20A | 56980632 | 7.1092  | 9.2434  | -0.6868 |
| YRI | PRR20A | 56985632 | 6.7887  | 8.5712  | -0.6151 |
| YRI | PRR20A | 56990632 | 9.4026  | 10.4199 | -0.2928 |
| YRI | PRR20A | 56995632 | 9.2493  | 10.0837 | -0.2477 |
| YRI | PRR20A | 57000632 | 6.4502  | 8.9073  | -0.8184 |
| YRI | PRR20A | 57005632 | 5.1642  | 9.2434  | -1.3128 |



## 2\_TajimasD\_data

|     |        |          |         |         |         |
|-----|--------|----------|---------|---------|---------|
| YRI | PRR20A | 57010632 | 7.104   | 10.2518 | -0.92   |
| YRI | PRR20A | 57015632 | 10.2584 | 13.2769 | -0.6918 |
| YRI | PRR20A | 57020632 | 9.8703  | 12.7727 | -0.69   |
| YRI | PRR20A | 57025632 | 9.4565  | 11.4282 | -0.5205 |
| YRI | PRR20A | 57030632 | 12.5012 | 11.9324 | 0.1442  |
| YRI | PRR20A | 57035632 | 15.9913 | 12.9408 | 0.7163  |
| YRI | PRR20A | 57040632 | 13.8296 | 12.4366 | 0.3396  |
| YRI | PRR20A | 57045632 | 7.295   | 8.7392  | -0.4895 |
| YRI | PRR20A | 57050632 | 10.2449 | 9.2434  | 0.3223  |
| YRI | PRR20A | 57055632 | 13.516  | 11.0921 | 0.6581  |
| YRI | PRR20A | 57060632 | 10.3214 | 10.756  | -0.1214 |
| YRI | PRR20A | 57065632 | 8.227   | 9.9157  | -0.5091 |
| YRI | PRR20A | 57070632 | 9.6506  | 11.5963 | -0.5067 |
| YRI | PRR20A | 57075632 | 11.7736 | 12.7727 | -0.2375 |
| YRI | PRR20A | 57080632 | 13.4385 | 12.1005 | 0.3347  |
| YRI | PRR20A | 57085632 | 14.7422 | 12.2685 | 0.6109  |
| YRI | PRR20A | 57090632 | 13.8788 | 11.9324 | 0.4934  |
| YRI | PRR20A | 57095632 | 13.4137 | 12.6047 | 0.1947  |
| YRI | PRR20A | 57100632 | 14.7683 | 11.9324 | 0.7189  |
| YRI | PRR20A | 57105632 | 16.2825 | 11.2602 | 1.3445  |
| YRI | PRR20A | 57110632 | 14.1372 | 11.7644 | 0.6096  |
| YRI | PRR20A | 57115632 | 10.1917 | 10.5879 | -0.1124 |
| YRI | PRR20A | 57120632 | 5.3948  | 9.4115  | -1.2713 |
| YRI | PRR20A | 57125632 | 4.3814  | 9.0754  | -1.5366 |
| YRI | PRR20A | 57130632 | 4.9518  | 8.5712  | -1.2491 |
| YRI | PRR20A | 57135632 | 3.8866  | 8.7392  | -1.6449 |
| YRI | PRR20A | 57140632 | 4.3102  | 8.7392  | -1.5013 |
| YRI | PRR20A | 57145632 | 4.7529  | 7.8989  | -1.1704 |
| YRI | PRR20A | 57150632 | 4.9152  | 8.5712  | -1.2617 |
| YRI | PRR20A | 57155632 | 4.5484  | 8.235   | -1.32   |
| YRI | PRR20A | 57160632 | 4.4189  | 7.8989  | -1.2946 |
| YRI | PRR20A | 57165632 | 6.1193  | 11.2602 | -1.3762 |
| YRI | PRR20A | 57170632 | 6.334   | 11.9324 | -1.4192 |
| YRI | PRR20A | 57175632 | 5.782   | 10.4199 | -1.3351 |
| YRI | PRR20A | 57180632 | 5.8436  | 10.4199 | -1.3174 |
| YRI | PRR20A | 57185632 | 3.521   | 7.8989  | -1.6287 |
| YRI | PRR20A | 57190632 | 2.9271  | 6.7225  | -1.6354 |
| YRI | PRR20A | 57195632 | 6.4213  | 10.2518 | -1.1196 |
| YRI | PRR20A | 57200632 | 6.2511  | 11.7644 | -1.4164 |
| YRI | PRR20A | 57205632 | 4.3426  | 10.924  | -1.8126 |
| YRI | PRR20A | 57210632 | 6.2522  | 10.924  | -1.2867 |
| YRI | PRR20A | 57215632 | 5.653   | 8.7392  | -1.0461 |
| YRI | PRR20A | 57220632 | 3.296   | 6.3864  | -1.3948 |
| YRI | PRR20A | 57225632 | 4.4116  | 8.9073  | -1.4973 |
| YRI | PRR20A | 57230632 | 4.2521  | 10.2518 | -1.7536 |
| YRI | PRR20A | 57235632 | 2.2828  | 7.3947  | -2.02   |
| YRI | PRR20A | 57240632 | 4.676   | 7.0586  | -0.9822 |
| YRI | PRR20A | 57245632 | 5.5137  | 6.5544  | -0.4588 |
| YRI | PRR20A | 57250632 | 4.07    | 6.5544  | -1.0953 |

## 2\_TajimasD\_data

|     |        |          |        |         |         |
|-----|--------|----------|--------|---------|---------|
| YRI | PRR20A | 57255632 | 4.6103 | 8.4031  | -1.333  |
| YRI | PRR20A | 57260632 | 3.6826 | 8.7392  | -1.7141 |
| YRI | PRR20A | 57265632 | 4.222  | 8.7392  | -1.5312 |
| YRI | PRR20A | 57270632 | 4.4039 | 8.4031  | -1.4056 |
| YRI | PRR20A | 57275632 | 4.1791 | 8.7392  | -1.5458 |
| YRI | PRR20A | 57280632 | 4.9924 | 8.7392  | -1.2701 |
| YRI | PRR20A | 57285632 | 3.1623 | 6.5544  | -1.4955 |
| YRI | PRR20A | 57290632 | 1.6411 | 5.2099  | -1.9317 |
| YRI | PRR20A | 57295632 | 5.1875 | 7.7309  | -0.965  |
| YRI | PRR20A | 57300632 | 5.3335 | 7.2267  | -0.7639 |
| YRI | PRR20A | 57305632 | 3.1543 | 6.3864  | -1.4587 |
| YRI | PRR20A | 57310632 | 3.9462 | 7.0586  | -1.2831 |
| YRI | PRR20A | 57315632 | 4.3377 | 7.3947  | -1.208  |
| YRI | PRR20A | 57320632 | 4.2756 | 7.8989  | -1.348  |
| YRI | PRR20A | 57325632 | 4.5613 | 8.4031  | -1.3502 |
| YRI | PRR20A | 57330632 | 5.9277 | 8.5712  | -0.9123 |
| YRI | PRR20A | 57335632 | 6.0584 | 9.0754  | -0.9876 |
| YRI | PRR20A | 57340632 | 5.5922 | 9.7476  | -1.273  |
| YRI | PRR20A | 57345632 | 6.2312 | 8.5712  | -0.8075 |
| YRI | PRR20A | 57350632 | 7.0893 | 8.9073  | -0.6055 |
| YRI | PRR20A | 57355632 | 7.4168 | 8.7392  | -0.4483 |
| YRI | PRR20A | 57360632 | 5.9375 | 7.3947  | -0.5758 |
| YRI | PRR20A | 57365632 | 2.7416 | 5.8822  | -1.5261 |
| YRI | PRR20A | 57370632 | 2.7841 | 6.0502  | -1.5475 |
| YRI | PRR20A | 57375632 | 4.9821 | 9.2434  | -1.3714 |
| YRI | PRR20A | 57380632 | 4.285  | 8.235   | -1.4143 |
| YRI | PRR20A | 57385632 | 2.5161 | 5.5461  | -1.5516 |
| YRI | PRR20A | 57390632 | 5.4771 | 9.0754  | -1.1779 |
| YRI | PRR20A | 57395632 | 9.0428 | 11.0921 | -0.5564 |
| YRI | PRR20A | 57400632 | 8.3351 | 11.4282 | -0.8166 |
| YRI | PRR20A | 57405632 | 6.9885 | 11.2602 | -1.1435 |
| YRI | PRR20A | 57410632 | 7.445  | 9.7476  | -0.7054 |
| YRI | PRR20A | 57415632 | 7.1623 | 9.5795  | -0.7526 |
| YRI | PRR20A | 57420632 | 4.9631 | 7.8989  | -1.0922 |
| YRI | PRR20A | 57425632 | 5.4619 | 8.067   | -0.9506 |
| YRI | PRR20A | 57430632 | 6.3448 | 9.4115  | -0.9706 |
| YRI | PRR20A | 57435632 | 4.9684 | 9.5795  | -1.4356 |
| YRI | PRR20A | 57440632 | 4.5684 | 9.9157  | -1.6122 |
| YRI | PRR20A | 57445632 | 7.4704 | 10.756  | -0.9182 |
| YRI | PRR20A | 57450632 | 8.8665 | 10.5879 | -0.4882 |
| YRI | PRR20A | 57455632 | 6.6713 | 9.4115  | -0.8673 |
| YRI | PRR20A | 57460632 | 5.0471 | 9.4115  | -1.3813 |
| YRI | PRR20A | 57465632 | 5.0072 | 7.5628  | -0.9893 |
| YRI | PRR20A | 57470632 | 6.2084 | 8.9073  | -0.8989 |
| YRI | PRR20A | 57475632 | 5.1293 | 9.7476  | -1.4148 |
| YRI | PRR20A | 57480632 | 4.3735 | 7.7309  | -1.2739 |
| YRI | PRR20A | 57485632 | 5.3409 | 7.8989  | -0.9516 |
| YRI | PRR20A | 57490632 | 4.9412 | 8.5712  | -1.2527 |
| YRI | PRR20A | 57495632 | 5.05   | 8.9073  | -1.2847 |

## 2\_TajimasD\_data

|     |        |          |         |         |         |
|-----|--------|----------|---------|---------|---------|
| YRI | PRR20A | 57500632 | 6.8515  | 8.9073  | -0.6847 |
| YRI | PRR20A | 57505632 | 7.7718  | 9.7476  | -0.6053 |
| YRI | PRR20A | 57510632 | 6.4978  | 8.235   | -0.622  |
| YRI | PRR20A | 57515632 | 7.0746  | 7.7309  | -0.249  |
| YRI | PRR20A | 57520632 | 8.0543  | 8.9073  | -0.2841 |
| YRI | PRR20A | 57525632 | 6.2895  | 9.9157  | -1.0933 |
| YRI | PRR20A | 57530632 | 5.708   | 12.7727 | -1.6795 |
| YRI | PRR20A | 57535632 | 6.4669  | 12.9408 | -1.5202 |
| YRI | PRR20A | 57540632 | 7.622   | 12.1005 | -1.1204 |
| YRI | PRR20A | 57545632 | 7.0481  | 11.9324 | -1.2382 |
| YRI | PRR20A | 57550632 | 6.3984  | 10.924  | -1.2464 |
| YRI | PRR20A | 57555632 | 12.5881 | 15.6298 | -0.597  |
| YRI | PRR20A | 57560632 | 16.6878 | 18.1507 | -0.2488 |
| YRI | PRR20A | 57565632 | 14.5404 | 16.302  | -0.3321 |
| YRI | PRR20A | 57570632 | 15.4262 | 15.7978 | -0.0722 |
| YRI | PRR20A | 57575632 | 13.7807 | 13.1089 | 0.1558  |
| YRI | PRR20A | 57580632 | 11.8622 | 12.1005 | -0.0596 |
| YRI | PRR20A | 57585632 | 12.7047 | 12.6047 | 0.0241  |
| YRI | PRR20A | 57590632 | 10.0256 | 11.4282 | -0.3703 |
| YRI | PRR20A | 57595632 | 8.3204  | 9.9157  | -0.481  |
| YRI | PRR20A | 57600632 | 11.2381 | 11.7644 | -0.1352 |
| YRI | PRR20A | 57605632 | 11.5464 | 13.7811 | -0.4944 |
| YRI | PRR20A | 57610632 | 8.2462  | 11.0921 | -0.7727 |
| YRI | PRR20A | 57615632 | 8.2654  | 11.7644 | -0.8989 |
| YRI | PRR20A | 57620632 | 6.447   | 10.756  | -1.2041 |
| YRI | PRR20A | 57625632 | 4.6074  | 9.0754  | -1.4626 |
| YRI | PRR20A | 57630632 | 4.8141  | 9.4115  | -1.455  |
| YRI | PRR20A | 57635632 | 7.5923  | 9.4115  | -0.5758 |
| YRI | PRR20A | 57640632 | 8.6094  | 10.756  | -0.5999 |
| YRI | PRR20A | 57645632 | 6.4205  | 10.4199 | -1.1513 |
| YRI | PRR20A | 57650632 | 9.1856  | 12.6047 | -0.8231 |
| YRI | PRR20A | 57655632 | 12.3053 | 13.445  | -0.2581 |
| CEU | PRR20A | 56672197 | 11.9336 | 9.7221  | 0.6834  |
| CEU | PRR20A | 56677197 | 11.8413 | 10.0632 | 0.5321  |
| CEU | PRR20A | 56682197 | 12.9687 | 9.3809  | 1.1462  |
| CEU | PRR20A | 56687197 | 12.1647 | 13.9861 | -0.3998 |
| CEU | PRR20A | 56692197 | 8.2643  | 13.1333 | -1.1345 |
| CEU | PRR20A | 56697197 | 5.1358  | 8.3576  | -1.1453 |
| CEU | PRR20A | 56702197 | 4.7335  | 6.1402  | -0.662  |
| CEU | PRR20A | 56707197 | 3.5706  | 4.6052  | -0.6282 |
| CEU | PRR20A | 56712197 | 3.45    | 6.1402  | -1.2659 |
| CEU | PRR20A | 56717197 | 3.6724  | 6.4814  | -1.259  |
| CEU | PRR20A | 56722197 | 3.0124  | 5.2874  | -1.2233 |
| CEU | PRR20A | 56727197 | 4.7436  | 5.7991  | -0.5228 |
| CEU | PRR20A | 56732197 | 4.8365  | 5.1169  | -0.1552 |
| CEU | PRR20A | 56737197 | 3.4483  | 3.4112  | 0.0291  |
| CEU | PRR20A | 56742197 | 2.2728  | 3.2407  | -0.7937 |
| CEU | PRR20A | 56747197 | 2.0921  | 4.9463  | -1.6277 |
| CEU | PRR20A | 56752197 | 2.973   | 4.7757  | -1.0602 |

## 2\_TajimasD\_data

|     |        |          |         |         |         |
|-----|--------|----------|---------|---------|---------|
| CEU | PRR20A | 56757197 | 2.0732  | 4.2641  | -1.4222 |
| CEU | PRR20A | 56762197 | 4.7209  | 6.9931  | -0.9507 |
| CEU | PRR20A | 56767197 | 6.1414  | 6.9931  | -0.3564 |
| CEU | PRR20A | 56772197 | 5.14    | 5.7991  | -0.3264 |
| CEU | PRR20A | 56777197 | 4.2874  | 5.7991  | -0.7487 |
| CEU | PRR20A | 56782197 | 4.1453  | 6.1402  | -0.9387 |
| CEU | PRR20A | 56787197 | 4.8629  | 6.1402  | -0.6011 |
| CEU | PRR20A | 56792197 | 3.8808  | 5.2874  | -0.7563 |
| CEU | PRR20A | 56797197 | 7.0251  | 7.1636  | -0.0567 |
| CEU | PRR20A | 56802197 | 9.3774  | 9.3809  | -0.0011 |
| CEU | PRR20A | 56807197 | 7.1824  | 7.8459  | -0.2499 |
| CEU | PRR20A | 56812197 | 6.4692  | 6.8225  | -0.1512 |
| CEU | PRR20A | 56817197 | 6.3451  | 8.0164  | -0.6173 |
| CEU | PRR20A | 56822197 | 7.8026  | 8.0164  | -0.079  |
| CEU | PRR20A | 56827197 | 8.4219  | 6.6519  | 0.7749  |
| CEU | PRR20A | 56832197 | 8.4477  | 8.8692  | -0.1418 |
| CEU | PRR20A | 56837197 | 10.2913 | 9.3809  | 0.2908  |
| CEU | PRR20A | 56842197 | 11.0229 | 7.8459  | 1.1968  |
| CEU | PRR20A | 56847197 | 7.4424  | 8.187   | -0.2698 |
| CEU | PRR20A | 56852197 | 4.5477  | 7.6753  | -1.2022 |
| CEU | PRR20A | 56857197 | 4.6077  | 7.3342  | -1.0924 |
| CEU | PRR20A | 56862197 | 4.032   | 5.9697  | -0.9352 |
| CEU | PRR20A | 56867197 | 2.8648  | 4.7757  | -1.1239 |
| CEU | PRR20A | 56872197 | 1.8924  | 4.0935  | -1.4801 |
| CEU | PRR20A | 56877197 | 2.7992  | 5.2874  | -1.3379 |
| CEU | PRR20A | 56882197 | 2.8281  | 5.2874  | -1.3224 |
| CEU | PRR20A | 56887197 | 2.0744  | 4.4346  | -1.4809 |
| CEU | PRR20A | 56892197 | 2.6846  | 6.3108  | -1.6649 |
| CEU | PRR20A | 56897197 | 3.0961  | 6.8225  | -1.5945 |
| CEU | PRR20A | 56902197 | 2.9666  | 4.9463  | -1.129  |
| CEU | PRR20A | 56907197 | 3.1584  | 4.9463  | -1.0196 |
| CEU | PRR20A | 56912197 | 3.5752  | 8.3576  | -1.7    |
| CEU | PRR20A | 56917197 | 5.7155  | 10.4043 | -1.3602 |
| CEU | PRR20A | 56922197 | 5.7112  | 8.8692  | -1.0627 |
| CEU | PRR20A | 56927197 | 4.477   | 8.3576  | -1.3794 |
| CEU | PRR20A | 56932197 | 3.7749  | 7.6753  | -1.4992 |
| CEU | PRR20A | 56937197 | 4.2127  | 6.6519  | -1.0679 |
| CEU | PRR20A | 56942197 | 5.961   | 7.3342  | -0.5502 |
| CEU | PRR20A | 56947197 | 6.1208  | 8.5281  | -0.8399 |
| CEU | PRR20A | 56952197 | 6.1767  | 10.916  | -1.3144 |
| CEU | PRR20A | 56957197 | 4.9126  | 9.3809  | -1.4275 |
| CEU | PRR20A | 56962197 | 5.457   | 7.5047  | -0.8034 |
| CEU | PRR20A | 56967197 | 5.0515  | 8.3576  | -1.1752 |
| CEU | PRR20A | 56972197 | 4.0715  | 7.6753  | -1.3852 |
| CEU | PRR20A | 56977197 | 5.9555  | 7.3342  | -0.5524 |
| CEU | PRR20A | 56982197 | 5.1954  | 6.9931  | -0.7522 |
| CEU | PRR20A | 56987197 | 5.4042  | 7.1636  | -0.7202 |
| CEU | PRR20A | 56992197 | 6.7244  | 7.3342  | -0.2443 |
| CEU | PRR20A | 56997197 | 6.4739  | 6.9931  | -0.2172 |

## 2\_TajimasD\_data

|     |        |          |         |         |         |
|-----|--------|----------|---------|---------|---------|
| CEU | PRR20A | 57002197 | 5.5242  | 6.4814  | -0.429  |
| CEU | PRR20A | 57007197 | 5.9103  | 6.3108  | -0.1839 |
| CEU | PRR20A | 57012197 | 7.3317  | 7.1636  | 0.0688  |
| CEU | PRR20A | 57017197 | 9.0161  | 8.6987  | 0.1087  |
| CEU | PRR20A | 57022197 | 8.6252  | 8.0164  | 0.2249  |
| CEU | PRR20A | 57027197 | 9.0695  | 8.3576  | 0.2531  |
| CEU | PRR20A | 57032197 | 15.2109 | 10.7454 | 1.2569  |
| CEU | PRR20A | 57037197 | 15.7351 | 10.4043 | 1.5464  |
| CEU | PRR20A | 57042197 | 9.8862  | 7.6753  | 0.8498  |
| CEU | PRR20A | 57047197 | 7.2672  | 6.4814  | 0.3522  |
| CEU | PRR20A | 57052197 | 11.5704 | 9.8926  | 0.5102  |
| CEU | PRR20A | 57057197 | 12.0602 | 9.3809  | 0.8559  |
| CEU | PRR20A | 57062197 | 7.5391  | 6.3108  | 0.5639  |
| CEU | PRR20A | 57067197 | 9.3364  | 7.5047  | 0.7187  |
| CEU | PRR20A | 57072197 | 12.0556 | 9.3809  | 0.8545  |
| CEU | PRR20A | 57077197 | 11.2202 | 9.2104  | 0.6531  |
| CEU | PRR20A | 57082197 | 11.4336 | 9.7221  | 0.5289  |
| CEU | PRR20A | 57087197 | 12.4848 | 9.7221  | 0.8538  |
| CEU | PRR20A | 57092197 | 14.6095 | 9.2104  | 1.7544  |
| CEU | PRR20A | 57097197 | 13.4221 | 8.8692  | 1.5321  |
| CEU | PRR20A | 57102197 | 12.1198 | 8.3576  | 1.3373  |
| CEU | PRR20A | 57107197 | 15.2319 | 8.8692  | 2.1411  |
| CEU | PRR20A | 57112197 | 12.0474 | 9.3809  | 0.8518  |
| CEU | PRR20A | 57117197 | 6.209   | 8.6987  | -0.853  |
| CEU | PRR20A | 57122197 | 4.8091  | 6.3108  | -0.6895 |
| CEU | PRR20A | 57127197 | 6.988   | 7.1636  | -0.0719 |
| CEU | PRR20A | 57132197 | 6.2268  | 6.9931  | -0.3206 |
| CEU | PRR20A | 57137197 | 3.5683  | 4.9463  | -0.7859 |
| CEU | PRR20A | 57142197 | 3.6737  | 4.6052  | -0.5656 |
| CEU | PRR20A | 57147197 | 4.4719  | 6.3108  | -0.8443 |
| CEU | PRR20A | 57152197 | 5.1802  | 8.5281  | -1.1681 |
| CEU | PRR20A | 57157197 | 3.9936  | 6.4814  | -1.1151 |
| CEU | PRR20A | 57162197 | 4.9217  | 5.6286  | -0.3596 |
| CEU | PRR20A | 57167197 | 6.9419  | 6.6519  | 0.127   |
| CEU | PRR20A | 57172197 | 5.6357  | 6.4814  | -0.3791 |
| CEU | PRR20A | 57177197 | 4.121   | 7.5047  | -1.3276 |
| CEU | PRR20A | 57182197 | 5.8738  | 8.3576  | -0.8829 |
| CEU | PRR20A | 57187197 | 5.8604  | 7.5047  | -0.6451 |
| CEU | PRR20A | 57192197 | 3.6586  | 6.4814  | -1.2652 |
| CEU | PRR20A | 57197197 | 3.8862  | 6.3108  | -1.1132 |
| CEU | PRR20A | 57202197 | 3.9528  | 6.8225  | -1.2279 |
| CEU | PRR20A | 57207197 | 7.1084  | 8.6987  | -0.5448 |
| CEU | PRR20A | 57212197 | 6.6823  | 6.8225  | -0.06   |
| CEU | PRR20A | 57217197 | 2.9072  | 4.7757  | -1.0989 |
| CEU | PRR20A | 57222197 | 2.9598  | 5.458   | -1.306  |
| CEU | PRR20A | 57227197 | 3.7188  | 5.2874  | -0.8434 |
| CEU | PRR20A | 57232197 | 2.8204  | 5.6286  | -1.4284 |
| CEU | PRR20A | 57237197 | 1.5597  | 5.1169  | -1.969  |
| CEU | PRR20A | 57242197 | 4.1691  | 6.3108  | -0.9833 |

## 2\_TajimasD\_data

|     |        |          |        |        |         |
|-----|--------|----------|--------|--------|---------|
| CEU | PRR20A | 57247197 | 4.8004 | 6.3108 | -0.6935 |
| CEU | PRR20A | 57252197 | 3.672  | 4.9463 | -0.7267 |
| CEU | PRR20A | 57257197 | 3.0907 | 4.7757 | -0.991  |
| CEU | PRR20A | 57262197 | 3.6867 | 5.2874 | -0.8607 |
| CEU | PRR20A | 57267197 | 4.8536 | 5.9697 | -0.5386 |
| CEU | PRR20A | 57272197 | 4.525  | 6.8225 | -0.9831 |
| CEU | PRR20A | 57277197 | 4.7872 | 8.3576 | -1.2692 |
| CEU | PRR20A | 57282197 | 4.2749 | 6.9931 | -1.1373 |
| CEU | PRR20A | 57287197 | 2.639  | 3.9229 | -0.8955 |
| CEU | PRR20A | 57292197 | 2.4572 | 4.6052 | -1.3041 |
| CEU | PRR20A | 57297197 | 3.3937 | 5.7991 | -1.1914 |
| CEU | PRR20A | 57302197 | 2.5545 | 6.1402 | -1.6873 |
| CEU | PRR20A | 57307197 | 2.4139 | 6.4814 | -1.8231 |
| CEU | PRR20A | 57312197 | 4.0629 | 6.1402 | -0.9775 |
| CEU | PRR20A | 57317197 | 6.2674 | 6.4814 | -0.0959 |
| CEU | PRR20A | 57322197 | 6.3432 | 6.6519 | -0.1352 |
| CEU | PRR20A | 57327197 | 4.73   | 6.8225 | -0.8954 |
| CEU | PRR20A | 57332197 | 4.9307 | 7.5047 | -1.0099 |
| CEU | PRR20A | 57337197 | 4.8326 | 7.1636 | -0.9542 |
| CEU | PRR20A | 57342197 | 6.6918 | 7.1636 | -0.1931 |
| CEU | PRR20A | 57347197 | 6.7873 | 6.4814 | 0.1371  |
| CEU | PRR20A | 57352197 | 5.7673 | 5.6286 | 0.0706  |
| CEU | PRR20A | 57357197 | 6.9344 | 6.8225 | 0.0479  |
| CEU | PRR20A | 57362197 | 4.677  | 6.6519 | -0.8646 |
| CEU | PRR20A | 57367197 | 2.2204 | 5.1169 | -1.6033 |
| CEU | PRR20A | 57372197 | 3.0093 | 5.1169 | -1.1666 |
| CEU | PRR20A | 57377197 | 4.6182 | 6.1402 | -0.7162 |
| CEU | PRR20A | 57382197 | 3.7341 | 6.3108 | -1.183  |
| CEU | PRR20A | 57387197 | 3.8736 | 6.9931 | -1.3053 |
| CEU | PRR20A | 57392197 | 4.1903 | 7.1636 | -1.2171 |
| CEU | PRR20A | 57397197 | 6.0684 | 6.9931 | -0.3869 |
| CEU | PRR20A | 57402197 | 7.7815 | 8.0164 | -0.0868 |
| CEU | PRR20A | 57407197 | 5.713  | 7.1636 | -0.5938 |
| CEU | PRR20A | 57412197 | 5.9472 | 5.9697 | -0.0109 |
| CEU | PRR20A | 57417197 | 5.6195 | 5.2874 | 0.1786  |
| CEU | PRR20A | 57422197 | 3.1808 | 4.7757 | -0.938  |
| CEU | PRR20A | 57427197 | 4.1134 | 5.6286 | -0.7707 |
| CEU | PRR20A | 57432197 | 5.4974 | 5.7991 | -0.1494 |
| CEU | PRR20A | 57437197 | 4.5844 | 5.2874 | -0.378  |
| CEU | PRR20A | 57442197 | 4.898  | 5.9697 | -0.5172 |
| CEU | PRR20A | 57447197 | 7.364  | 7.5047 | -0.0552 |
| CEU | PRR20A | 57452197 | 6.8899 | 7.3342 | -0.178  |
| CEU | PRR20A | 57457197 | 4.0711 | 6.8225 | -1.1773 |
| CEU | PRR20A | 57462197 | 4.7285 | 5.7991 | -0.5303 |
| CEU | PRR20A | 57467197 | 5.4478 | 4.2641 | 0.7684  |
| CEU | PRR20A | 57472197 | 6.0698 | 6.4814 | -0.1845 |
| CEU | PRR20A | 57477197 | 4.7959 | 6.8225 | -0.8672 |
| CEU | PRR20A | 57482197 | 4.2556 | 5.9697 | -0.8272 |
| CEU | PRR20A | 57487197 | 5.5092 | 5.6286 | -0.0607 |

## 2\_TajimasD\_data

|     |        |          |         |         |         |
|-----|--------|----------|---------|---------|---------|
| CEU | PRR20A | 57492197 | 4.1227  | 5.2874  | -0.6263 |
| CEU | PRR20A | 57497197 | 2.5943  | 5.6286  | -1.5434 |
| CEU | PRR20A | 57502197 | 3.764   | 5.6286  | -0.9484 |
| CEU | PRR20A | 57507197 | 5.511   | 6.6519  | -0.4995 |
| CEU | PRR20A | 57512197 | 5.3041  | 6.6519  | -0.5901 |
| CEU | PRR20A | 57517197 | 4.4904  | 6.1402  | -0.7763 |
| CEU | PRR20A | 57522197 | 3.4393  | 4.7757  | -0.786  |
| CEU | PRR20A | 57527197 | 3.1587  | 4.7757  | -0.951  |
| CEU | PRR20A | 57532197 | 2.108   | 3.9229  | -1.2658 |
| CEU | PRR20A | 57537197 | 2.4725  | 3.4112  | -0.7373 |
| CEU | PRR20A | 57542197 | 2.7666  | 4.6052  | -1.1163 |
| CEU | PRR20A | 57547197 | 1.1414  | 4.2641  | -2.0271 |
| CEU | PRR20A | 57552197 | 9.4062  | 8.0164  | 0.5133  |
| CEU | PRR20A | 57557197 | 17.2382 | 12.1099 | 1.2901  |
| CEU | PRR20A | 57562197 | 14.9744 | 11.0866 | 1.0627  |
| CEU | PRR20A | 57567197 | 14.7844 | 11.4277 | 0.8918  |
| CEU | PRR20A | 57572197 | 15.8646 | 11.7688 | 1.0585  |
| CEU | PRR20A | 57577197 | 15.8512 | 11.5982 | 1.1143  |
| CEU | PRR20A | 57582197 | 14.4727 | 10.7454 | 1.0491  |
| CEU | PRR20A | 57587197 | 14.0266 | 9.2104  | 1.565   |
| CEU | PRR20A | 57592197 | 15.0509 | 9.5515  | 1.7277  |
| CEU | PRR20A | 57597197 | 14.6702 | 9.5515  | 1.6081  |
| CEU | PRR20A | 57602197 | 15.7813 | 9.8926  | 1.7906  |
| CEU | PRR20A | 57607197 | 14.6692 | 9.2104  | 1.7738  |
| CEU | PRR20A | 57612197 | 12.9341 | 9.0398  | 1.2875  |
| CEU | PRR20A | 57617197 | 12.5042 | 9.0398  | 1.1454  |
| CEU | PRR20A | 57622197 | 8.9601  | 7.5047  | 0.571   |
| CEU | PRR20A | 57627197 | 5.7082  | 6.6519  | -0.4132 |
| CEU | PRR20A | 57632197 | 9.6863  | 8.3576  | 0.4723  |
| CEU | PRR20A | 57637197 | 13.2663 | 10.0632 | 0.9586  |
| CEU | PRR20A | 57642197 | 9.4925  | 8.0164  | 0.5452  |
| CEU | PRR20A | 57647197 | 9.4071  | 8.0164  | 0.5137  |
| CEU | PRR20A | 57652197 | 16.121  | 12.1099 | 1.0091  |
| CEU | PRR20A | 57657197 | 19.5267 | 13.4744 | 1.3764  |
| CEU | PRR20A | 57662197 | 14.8151 | 10.4043 | 1.2795  |
| CHB | PRR20A | 56672197 | 11.8637 | 9.8261  | 0.6217  |
| CHB | PRR20A | 56677197 | 11.2071 | 9.6567  | 0.4807  |
| CHB | PRR20A | 56682197 | 12.0893 | 10.1649 | 0.5689  |
| CHB | PRR20A | 56687197 | 12.8715 | 16.2638 | -0.6431 |
| CHB | PRR20A | 56692197 | 9.6118  | 15.925  | -1.2212 |
| CHB | PRR20A | 56697197 | 4.7411  | 9.3178  | -1.467  |
| CHB | PRR20A | 56702197 | 4.605   | 7.1154  | -1.0309 |
| CHB | PRR20A | 56707197 | 4.3236  | 7.4543  | -1.2323 |
| CHB | PRR20A | 56712197 | 4.4042  | 9.4872  | -1.6023 |
| CHB | PRR20A | 56717197 | 4.5342  | 9.9955  | -1.6399 |
| CHB | PRR20A | 56722197 | 3.4693  | 8.979   | -1.8277 |
| CHB | PRR20A | 56727197 | 4.1892  | 9.9955  | -1.7435 |
| CHB | PRR20A | 56732197 | 4.6627  | 10.3343 | -1.6509 |
| CHB | PRR20A | 56737197 | 4.1251  | 9.9955  | -1.7628 |

## 2\_TajimasD\_data

|     |        |          |        |         |         |
|-----|--------|----------|--------|---------|---------|
| CHB | PRR20A | 56742197 | 2.8793 | 9.8261  | -2.1195 |
| CHB | PRR20A | 56747197 | 2.5995 | 9.4872  | -2.1712 |
| CHB | PRR20A | 56752197 | 3.3982 | 8.4708  | -1.7758 |
| CHB | PRR20A | 56757197 | 3.7382 | 7.2848  | -1.4256 |
| CHB | PRR20A | 56762197 | 3.7049 | 7.6237  | -1.5112 |
| CHB | PRR20A | 56767197 | 3.8923 | 7.4543  | -1.4021 |
| CHB | PRR20A | 56772197 | 4.3514 | 8.979   | -1.5351 |
| CHB | PRR20A | 56777197 | 3.2646 | 10.1649 | -2.0398 |
| CHB | PRR20A | 56782197 | 3.1666 | 8.1319  | -1.8048 |
| CHB | PRR20A | 56787197 | 3.5266 | 7.2848  | -1.5107 |
| CHB | PRR20A | 56792197 | 2.9682 | 8.6402  | -1.9497 |
| CHB | PRR20A | 56797197 | 5.1454 | 9.6567  | -1.3989 |
| CHB | PRR20A | 56802197 | 7.0504 | 9.9955  | -0.8844 |
| CHB | PRR20A | 56807197 | 6.5176 | 8.979   | -0.8165 |
| CHB | PRR20A | 56812197 | 5.9741 | 8.3013  | -0.83   |
| CHB | PRR20A | 56817197 | 5.3343 | 9.1484  | -1.2435 |
| CHB | PRR20A | 56822197 | 7.1544 | 9.8261  | -0.8151 |
| CHB | PRR20A | 56827197 | 7.687  | 9.4872  | -0.5675 |
| CHB | PRR20A | 56832197 | 7.5631 | 8.1319  | -0.2067 |
| CHB | PRR20A | 56837197 | 8.2909 | 7.6237  | 0.2573  |
| CHB | PRR20A | 56842197 | 9.7049 | 9.3178  | 0.1241  |
| CHB | PRR20A | 56847197 | 8.2509 | 10.3343 | -0.6064 |
| CHB | PRR20A | 56852197 | 5.4841 | 8.1319  | -0.9624 |
| CHB | PRR20A | 56857197 | 4.6832 | 5.9295  | -0.6034 |
| CHB | PRR20A | 56862197 | 4.4397 | 6.7766  | -1.0031 |
| CHB | PRR20A | 56867197 | 3.8409 | 6.6072  | -1.215  |
| CHB | PRR20A | 56872197 | 2.0725 | 4.7436  | -1.5756 |
| CHB | PRR20A | 56877197 | 2.6669 | 4.7436  | -1.225  |
| CHB | PRR20A | 56882197 | 2.7582 | 4.913   | -1.2325 |
| CHB | PRR20A | 56887197 | 1.7678 | 5.4213  | -1.9158 |
| CHB | PRR20A | 56892197 | 1.8565 | 6.6072  | -2.0866 |
| CHB | PRR20A | 56897197 | 3.0748 | 6.2684  | -1.4709 |
| CHB | PRR20A | 56902197 | 3.1946 | 5.2519  | -1.1096 |
| CHB | PRR20A | 56907197 | 3.8878 | 6.0989  | -1.0437 |
| CHB | PRR20A | 56912197 | 4.3146 | 7.4543  | -1.2359 |
| CHB | PRR20A | 56917197 | 4.9235 | 6.7766  | -0.7955 |
| CHB | PRR20A | 56922197 | 4.4864 | 6.0989  | -0.7612 |
| CHB | PRR20A | 56927197 | 2.7245 | 5.4213  | -1.4141 |
| CHB | PRR20A | 56932197 | 2.7013 | 5.4213  | -1.4263 |
| CHB | PRR20A | 56937197 | 3.9905 | 6.4378  | -1.1004 |
| CHB | PRR20A | 56942197 | 5.0438 | 5.9295  | -0.4288 |
| CHB | PRR20A | 56947197 | 4.2319 | 6.7766  | -1.0923 |
| CHB | PRR20A | 56952197 | 3.9107 | 8.4708  | -1.5964 |
| CHB | PRR20A | 56957197 | 3.2549 | 7.1154  | -1.5854 |
| CHB | PRR20A | 56962197 | 4.6908 | 6.7766  | -0.8954 |
| CHB | PRR20A | 56967197 | 4.9239 | 6.7766  | -0.7953 |
| CHB | PRR20A | 56972197 | 3.198  | 5.5907  | -1.2208 |
| CHB | PRR20A | 56977197 | 4.7457 | 5.5907  | -0.4311 |
| CHB | PRR20A | 56982197 | 4.1683 | 5.7601  | -0.7908 |



## 2\_TajimasD\_data

|     |        |          |         |         |         |
|-----|--------|----------|---------|---------|---------|
| CHB | PRR20A | 56987197 | 4.2252  | 7.2848  | -1.2299 |
| CHB | PRR20A | 56992197 | 5.4615  | 7.7931  | -0.8812 |
| CHB | PRR20A | 56997197 | 5.8212  | 7.2848  | -0.5883 |
| CHB | PRR20A | 57002197 | 4.9631  | 6.0989  | -0.5361 |
| CHB | PRR20A | 57007197 | 4.5846  | 5.0825  | -0.2764 |
| CHB | PRR20A | 57012197 | 6.2353  | 7.2848  | -0.4219 |
| CHB | PRR20A | 57017197 | 7.3684  | 9.1484  | -0.5803 |
| CHB | PRR20A | 57022197 | 6.6284  | 8.8096  | -0.7364 |
| CHB | PRR20A | 57027197 | 7.5357  | 8.3013  | -0.273  |
| CHB | PRR20A | 57032197 | 12.4742 | 10.1649 | 0.6827  |
| CHB | PRR20A | 57037197 | 12.5751 | 10.1649 | 0.7125  |
| CHB | PRR20A | 57042197 | 7.8637  | 7.9625  | -0.0366 |
| CHB | PRR20A | 57047197 | 5.1624  | 6.4378  | -0.5735 |
| CHB | PRR20A | 57052197 | 8.774   | 7.7931  | 0.3707  |
| CHB | PRR20A | 57057197 | 9.747   | 8.6402  | 0.3804  |
| CHB | PRR20A | 57062197 | 6.1774  | 7.1154  | -0.3852 |
| CHB | PRR20A | 57067197 | 7.4184  | 7.1154  | 0.1244  |
| CHB | PRR20A | 57072197 | 9.3232  | 7.7931  | 0.5783  |
| CHB | PRR20A | 57077197 | 8.9197  | 7.2848  | 0.6572  |
| CHB | PRR20A | 57082197 | 9.3246  | 7.7931  | 0.5788  |
| CHB | PRR20A | 57087197 | 9.7249  | 7.9625  | 0.6531  |
| CHB | PRR20A | 57092197 | 11.0423 | 8.4708  | 0.9002  |
| CHB | PRR20A | 57097197 | 10.4201 | 8.6402  | 0.6118  |
| CHB | PRR20A | 57102197 | 9.7874  | 7.4543  | 0.9184  |
| CHB | PRR20A | 57107197 | 11.9173 | 8.8096  | 1.0492  |
| CHB | PRR20A | 57112197 | 9.7591  | 8.3013  | 0.5199  |
| CHB | PRR20A | 57117197 | 5.5172  | 5.4213  | 0.0503  |
| CHB | PRR20A | 57122197 | 4.067   | 4.4048  | -0.2126 |
| CHB | PRR20A | 57127197 | 6.2661  | 5.5907  | 0.3446  |
| CHB | PRR20A | 57132197 | 5.9484  | 6.0989  | -0.071  |
| CHB | PRR20A | 57137197 | 3.3288  | 5.4213  | -1.0972 |
| CHB | PRR20A | 57142197 | 3.3432  | 5.0825  | -0.9656 |
| CHB | PRR20A | 57147197 | 4.482   | 6.2684  | -0.8228 |
| CHB | PRR20A | 57152197 | 4.9684  | 6.946   | -0.8301 |
| CHB | PRR20A | 57157197 | 2.9046  | 5.2519  | -1.266  |
| CHB | PRR20A | 57162197 | 3.9484  | 6.0989  | -1.0151 |
| CHB | PRR20A | 57167197 | 6.6044  | 6.7766  | -0.0739 |
| CHB | PRR20A | 57172197 | 5.1668  | 5.5907  | -0.2163 |
| CHB | PRR20A | 57177197 | 3.4015  | 5.4213  | -1.0591 |
| CHB | PRR20A | 57182197 | 5.0805  | 5.5907  | -0.2603 |
| CHB | PRR20A | 57187197 | 5.3282  | 5.0825  | 0.1364  |
| CHB | PRR20A | 57192197 | 3.6019  | 4.5742  | -0.5921 |
| CHB | PRR20A | 57197197 | 3.9785  | 6.4378  | -1.1058 |
| CHB | PRR20A | 57202197 | 4.2658  | 6.7766  | -1.0778 |
| CHB | PRR20A | 57207197 | 6.5294  | 7.4543  | -0.3641 |
| CHB | PRR20A | 57212197 | 5.94    | 6.6072  | -0.293  |
| CHB | PRR20A | 57217197 | 2.957   | 4.2354  | -0.8322 |
| CHB | PRR20A | 57222197 | 3.099   | 5.2519  | -1.1611 |
| CHB | PRR20A | 57227197 | 4.2381  | 6.2684  | -0.9351 |

## 2\_TajimasD\_data

|     |        |          |        |        |         |
|-----|--------|----------|--------|--------|---------|
| CHB | PRR20A | 57232197 | 3.4409 | 5.7601 | -1.1522 |
| CHB | PRR20A | 57237197 | 1.5298 | 4.2354 | -1.7614 |
| CHB | PRR20A | 57242197 | 3.5492 | 4.4048 | -0.5384 |
| CHB | PRR20A | 57247197 | 4.4436 | 5.4213 | -0.5127 |
| CHB | PRR20A | 57252197 | 3.4755 | 5.9295 | -1.188  |
| CHB | PRR20A | 57257197 | 3.0331 | 5.7601 | -1.3548 |
| CHB | PRR20A | 57262197 | 3.3653 | 5.4213 | -1.0781 |
| CHB | PRR20A | 57267197 | 4.2364 | 6.2684 | -0.9359 |
| CHB | PRR20A | 57272197 | 4.118  | 6.0989 | -0.9351 |
| CHB | PRR20A | 57277197 | 5.0678 | 7.4543 | -0.9394 |
| CHB | PRR20A | 57282197 | 4.8129 | 6.946  | -0.8954 |
| CHB | PRR20A | 57287197 | 2.6749 | 4.4048 | -1.0885 |
| CHB | PRR20A | 57292197 | 2.5902 | 4.2354 | -1.071  |
| CHB | PRR20A | 57297197 | 3.4397 | 4.2354 | -0.518  |
| CHB | PRR20A | 57302197 | 2.2117 | 4.7436 | -1.4935 |
| CHB | PRR20A | 57307197 | 2.162  | 4.7436 | -1.5228 |
| CHB | PRR20A | 57312197 | 3.9237 | 5.0825 | -0.6433 |
| CHB | PRR20A | 57317197 | 6.2083 | 6.0989 | 0.0516  |
| CHB | PRR20A | 57322197 | 6.1965 | 6.6072 | -0.1804 |
| CHB | PRR20A | 57327197 | 4.7649 | 6.2684 | -0.6925 |
| CHB | PRR20A | 57332197 | 5.5593 | 5.9295 | -0.1792 |
| CHB | PRR20A | 57337197 | 5.2638 | 7.4543 | -0.8622 |
| CHB | PRR20A | 57342197 | 6.6132 | 8.6402 | -0.6968 |
| CHB | PRR20A | 57347197 | 7.601  | 6.946  | 0.2749  |
| CHB | PRR20A | 57352197 | 6.8492 | 6.4378 | 0.185   |
| CHB | PRR20A | 57357197 | 7.2656 | 6.7766 | 0.2099  |
| CHB | PRR20A | 57362197 | 5.2334 | 5.5907 | -0.1823 |
| CHB | PRR20A | 57367197 | 3.0078 | 5.4213 | -1.2656 |
| CHB | PRR20A | 57372197 | 3.1218 | 6.0989 | -1.4053 |
| CHB | PRR20A | 57377197 | 4.7011 | 5.9295 | -0.5947 |
| CHB | PRR20A | 57382197 | 3.4333 | 4.7436 | -0.7729 |
| CHB | PRR20A | 57387197 | 3.1595 | 5.2519 | -1.1285 |
| CHB | PRR20A | 57392197 | 4.7169 | 6.4378 | -0.7738 |
| CHB | PRR20A | 57397197 | 6.8725 | 8.1319 | -0.4578 |
| CHB | PRR20A | 57402197 | 7.918  | 8.979  | -0.352  |
| CHB | PRR20A | 57407197 | 5.593  | 7.1154 | -0.6252 |
| CHB | PRR20A | 57412197 | 5.6151 | 6.946  | -0.5587 |
| CHB | PRR20A | 57417197 | 6.0063 | 6.946  | -0.3944 |
| CHB | PRR20A | 57422197 | 3.8888 | 5.5907 | -0.8683 |
| CHB | PRR20A | 57427197 | 3.8942 | 5.7601 | -0.927  |
| CHB | PRR20A | 57432197 | 5.5408 | 6.7766 | -0.5305 |
| CHB | PRR20A | 57437197 | 4.4432 | 6.0989 | -0.7816 |
| CHB | PRR20A | 57442197 | 4.7411 | 5.4213 | -0.3567 |
| CHB | PRR20A | 57447197 | 7.1555 | 6.7766 | 0.1626  |
| CHB | PRR20A | 57452197 | 6.6608 | 6.946  | -0.1197 |
| CHB | PRR20A | 57457197 | 3.7963 | 6.0989 | -1.0869 |
| CHB | PRR20A | 57462197 | 4.5068 | 6.6072 | -0.9225 |
| CHB | PRR20A | 57467197 | 5.4611 | 6.6072 | -0.5034 |
| CHB | PRR20A | 57472197 | 6.0775 | 8.6402 | -0.8809 |

## 2\_TajimasD\_data

|     |        |          |         |         |         |
|-----|--------|----------|---------|---------|---------|
| CHB | PRR20A | 57477197 | 4.9204  | 7.7931  | -1.0857 |
| CHB | PRR20A | 57482197 | 3.9229  | 5.0825  | -0.6438 |
| CHB | PRR20A | 57487197 | 5.1972  | 5.5907  | -0.2008 |
| CHB | PRR20A | 57492197 | 4.2018  | 5.2519  | -0.5664 |
| CHB | PRR20A | 57497197 | 3.3543  | 5.5907  | -1.1411 |
| CHB | PRR20A | 57502197 | 4.4342  | 6.0989  | -0.7858 |
| CHB | PRR20A | 57507197 | 5.3678  | 5.9295  | -0.2719 |
| CHB | PRR20A | 57512197 | 5.1464  | 5.7601  | -0.3049 |
| CHB | PRR20A | 57517197 | 5.0493  | 6.946   | -0.7962 |
| CHB | PRR20A | 57522197 | 4.1748  | 6.0989  | -0.9083 |
| CHB | PRR20A | 57527197 | 3.5631  | 5.9295  | -1.1456 |
| CHB | PRR20A | 57532197 | 2.5844  | 8.1319  | -2.0164 |
| CHB | PRR20A | 57537197 | 2.7948  | 8.4708  | -1.987  |
| CHB | PRR20A | 57542197 | 3.1043  | 8.3013  | -1.8535 |
| CHB | PRR20A | 57547197 | 1.669   | 8.979   | -2.425  |
| CHB | PRR20A | 57552197 | 7.3033  | 10.6731 | -0.9518 |
| CHB | PRR20A | 57557197 | 16.1536 | 12.8755 | 0.7761  |
| CHB | PRR20A | 57562197 | 16.4727 | 11.8591 | 1.1804  |
| CHB | PRR20A | 57567197 | 15.3701 | 10.8426 | 1.26    |
| CHB | PRR20A | 57572197 | 17.2762 | 12.0285 | 1.3248  |
| CHB | PRR20A | 57577197 | 16.5958 | 10.6731 | 1.6728  |
| CHB | PRR20A | 57582197 | 16.4161 | 10.5037 | 1.6951  |
| CHB | PRR20A | 57587197 | 16.4769 | 11.1814 | 1.4319  |
| CHB | PRR20A | 57592197 | 13.9911 | 10.5037 | 0.9998  |
| CHB | PRR20A | 57597197 | 13.2458 | 10.5037 | 0.7862  |
| CHB | PRR20A | 57602197 | 15.3276 | 10.8426 | 1.2482  |
| CHB | PRR20A | 57607197 | 14.7643 | 11.012  | 1.0292  |
| CHB | PRR20A | 57612197 | 13.748  | 10.5037 | 0.9301  |
| CHB | PRR20A | 57617197 | 12.9905 | 8.8096  | 1.4116  |
| CHB | PRR20A | 57622197 | 9.1788  | 6.7766  | 1.0312  |
| CHB | PRR20A | 57627197 | 6.6328  | 6.2684  | 0.1678  |
| CHB | PRR20A | 57632197 | 8.8837  | 7.6237  | 0.4859  |
| CHB | PRR20A | 57637197 | 11.5403 | 8.6402  | 0.9969  |
| CHB | PRR20A | 57642197 | 8.7672  | 7.7931  | 0.3682  |
| CHB | PRR20A | 57647197 | 9.5113  | 7.9625  | 0.5739  |
| CHB | PRR20A | 57652197 | 16.321  | 10.5037 | 1.6678  |
| CHB | PRR20A | 57657197 | 18.5357 | 11.5202 | 1.8445  |
| CHB | PRR20A | 57662197 | 14.2911 | 10.1649 | 1.2198  |
| YRI | PRR20A | 56672197 | 14.4146 | 15.6298 | -0.2385 |
| YRI | PRR20A | 56677197 | 13.7611 | 13.7811 | -0.0044 |
| YRI | PRR20A | 56682197 | 16.4779 | 15.6298 | 0.1664  |
| YRI | PRR20A | 56687197 | 24.1738 | 22.8565 | 0.1794  |
| YRI | PRR20A | 56692197 | 19.078  | 19.9994 | -0.1428 |
| YRI | PRR20A | 56697197 | 9.9341  | 13.7811 | -0.8511 |
| YRI | PRR20A | 56702197 | 11.0377 | 12.4366 | -0.341  |
| YRI | PRR20A | 56707197 | 13.1881 | 12.7727 | 0.0988  |
| YRI | PRR20A | 56712197 | 15.9577 | 15.2937 | 0.133   |
| YRI | PRR20A | 56717197 | 13.7731 | 13.2769 | 0.1137  |
| YRI | PRR20A | 56722197 | 10.0357 | 10.756  | -0.2013 |

## 2\_TajimasD\_data

|     |        |          |         |         |         |
|-----|--------|----------|---------|---------|---------|
| YRI | PRR20A | 56727197 | 13.8191 | 13.1089 | 0.1647  |
| YRI | PRR20A | 56732197 | 17.4946 | 14.4534 | 0.643   |
| YRI | PRR20A | 56737197 | 14.0717 | 14.6214 | -0.115  |
| YRI | PRR20A | 56742197 | 10.454  | 12.2685 | -0.4481 |
| YRI | PRR20A | 56747197 | 9.0724  | 10.4199 | -0.3879 |
| YRI | PRR20A | 56752197 | 9.6519  | 10.924  | -0.3504 |
| YRI | PRR20A | 56757197 | 9.3276  | 11.5963 | -0.5908 |
| YRI | PRR20A | 56762197 | 9.1861  | 13.9492 | -1.0417 |
| YRI | PRR20A | 56767197 | 10.0866 | 12.7727 | -0.6386 |
| YRI | PRR20A | 56772197 | 12.318  | 12.4366 | -0.0289 |
| YRI | PRR20A | 56777197 | 15.2098 | 14.2853 | 0.1977  |
| YRI | PRR20A | 56782197 | 13.3069 | 12.4366 | 0.2122  |
| YRI | PRR20A | 56787197 | 9.9455  | 11.5963 | -0.4299 |
| YRI | PRR20A | 56792197 | 10.2633 | 12.4366 | -0.5298 |
| YRI | PRR20A | 56797197 | 11.2425 | 11.7644 | -0.1341 |
| YRI | PRR20A | 56802197 | 10.1902 | 11.5963 | -0.3662 |
| YRI | PRR20A | 56807197 | 9.4653  | 10.924  | -0.4018 |
| YRI | PRR20A | 56812197 | 8.4262  | 8.235   | 0.0685  |
| YRI | PRR20A | 56817197 | 9.41    | 8.7392  | 0.2274  |
| YRI | PRR20A | 56822197 | 12.231  | 13.1089 | -0.2036 |
| YRI | PRR20A | 56827197 | 11.7666 | 12.6047 | -0.2018 |
| YRI | PRR20A | 56832197 | 10.9459 | 10.5879 | 0.1015  |
| YRI | PRR20A | 56837197 | 10.8164 | 10.0837 | 0.2175  |
| YRI | PRR20A | 56842197 | 13.4137 | 12.1005 | 0.3285  |
| YRI | PRR20A | 56847197 | 11.9807 | 12.7727 | -0.1883 |
| YRI | PRR20A | 56852197 | 7.3153  | 10.5879 | -0.9281 |
| YRI | PRR20A | 56857197 | 5.9644  | 9.0754  | -1.0184 |
| YRI | PRR20A | 56862197 | 6.391   | 9.0754  | -0.8787 |
| YRI | PRR20A | 56867197 | 5.7345  | 9.9157  | -1.2606 |
| YRI | PRR20A | 56872197 | 5.1469  | 9.9157  | -1.4378 |
| YRI | PRR20A | 56877197 | 4.6239  | 8.9073  | -1.4266 |
| YRI | PRR20A | 56882197 | 2.776   | 6.7225  | -1.7005 |
| YRI | PRR20A | 56887197 | 2.7782  | 6.3864  | -1.6285 |
| YRI | PRR20A | 56892197 | 4.7516  | 8.067   | -1.2098 |
| YRI | PRR20A | 56897197 | 6.0106  | 8.5712  | -0.8837 |
| YRI | PRR20A | 56902197 | 4.7921  | 6.2183  | -0.6593 |
| YRI | PRR20A | 56907197 | 5.5403  | 6.3864  | -0.3819 |
| YRI | PRR20A | 56912197 | 6.4354  | 8.4031  | -0.6916 |
| YRI | PRR20A | 56917197 | 7.0893  | 9.0754  | -0.6501 |
| YRI | PRR20A | 56922197 | 6.9051  | 9.0754  | -0.7104 |
| YRI | PRR20A | 56927197 | 6.017   | 8.9073  | -0.9626 |
| YRI | PRR20A | 56932197 | 6.7787  | 9.7476  | -0.9095 |
| YRI | PRR20A | 56937197 | 9.2026  | 11.4282 | -0.5876 |
| YRI | PRR20A | 56942197 | 9.0508  | 12.2685 | -0.7946 |
| YRI | PRR20A | 56947197 | 6.9979  | 13.7811 | -1.5006 |
| YRI | PRR20A | 56952197 | 8.8812  | 14.4534 | -1.1782 |
| YRI | PRR20A | 56957197 | 7.863   | 11.0921 | -0.8767 |
| YRI | PRR20A | 56962197 | 5.6676  | 11.0921 | -1.4728 |
| YRI | PRR20A | 56967197 | 6.7999  | 10.756  | -1.1055 |

## 2\_TajimasD\_data

|     |        |          |         |         |         |
|-----|--------|----------|---------|---------|---------|
| YRI | PRR20A | 56972197 | 6.5521  | 7.8989  | -0.501  |
| YRI | PRR20A | 56977197 | 6.6043  | 9.0754  | -0.8089 |
| YRI | PRR20A | 56982197 | 7.472   | 9.9157  | -0.7368 |
| YRI | PRR20A | 56987197 | 7.5344  | 9.2434  | -0.55   |
| YRI | PRR20A | 56992197 | 8.3478  | 9.7476  | -0.4288 |
| YRI | PRR20A | 56997197 | 8.8881  | 10.5879 | -0.4821 |
| YRI | PRR20A | 57002197 | 6.7029  | 8.9073  | -0.7342 |
| YRI | PRR20A | 57007197 | 5.8391  | 8.9073  | -1.0219 |
| YRI | PRR20A | 57012197 | 8.0639  | 11.9324 | -0.9807 |
| YRI | PRR20A | 57017197 | 9.938   | 13.2769 | -0.7652 |
| YRI | PRR20A | 57022197 | 9.7533  | 12.2685 | -0.6211 |
| YRI | PRR20A | 57027197 | 9.2736  | 10.924  | -0.4546 |
| YRI | PRR20A | 57032197 | 14.7945 | 12.6047 | 0.5271  |
| YRI | PRR20A | 57037197 | 16.4217 | 13.2769 | 0.7207  |
| YRI | PRR20A | 57042197 | 10.1462 | 10.2518 | -0.0309 |
| YRI | PRR20A | 57047197 | 6.6625  | 8.235   | -0.563  |
| YRI | PRR20A | 57052197 | 12.7152 | 10.924  | 0.4933  |
| YRI | PRR20A | 57057197 | 13.7015 | 11.0921 | 0.7085  |
| YRI | PRR20A | 57062197 | 8.6392  | 10.2518 | -0.4713 |
| YRI | PRR20A | 57067197 | 10.1855 | 11.4282 | -0.3281 |
| YRI | PRR20A | 57072197 | 11.7996 | 12.2685 | -0.1158 |
| YRI | PRR20A | 57077197 | 10.5797 | 11.7644 | -0.3044 |
| YRI | PRR20A | 57082197 | 12.0553 | 11.7644 | 0.0747  |
| YRI | PRR20A | 57087197 | 13.9746 | 11.9324 | 0.5177  |
| YRI | PRR20A | 57092197 | 15.6244 | 12.9408 | 0.6301  |
| YRI | PRR20A | 57097197 | 14.4983 | 12.7727 | 0.4102  |
| YRI | PRR20A | 57102197 | 13.2758 | 10.756  | 0.7042  |
| YRI | PRR20A | 57107197 | 16.2298 | 11.0921 | 1.3949  |
| YRI | PRR20A | 57112197 | 13.9089 | 11.2602 | 0.7091  |
| YRI | PRR20A | 57117197 | 8.0892  | 10.924  | -0.7808 |
| YRI | PRR20A | 57122197 | 4.2002  | 9.2434  | -1.623  |
| YRI | PRR20A | 57127197 | 5.0961  | 8.5712  | -1.1993 |
| YRI | PRR20A | 57132197 | 5.7554  | 9.2434  | -1.1225 |
| YRI | PRR20A | 57137197 | 3.3787  | 8.9073  | -1.8413 |
| YRI | PRR20A | 57142197 | 3.2962  | 7.2267  | -1.586  |
| YRI | PRR20A | 57147197 | 5.9067  | 8.235   | -0.8337 |
| YRI | PRR20A | 57152197 | 6.074   | 9.5795  | -1.0914 |
| YRI | PRR20A | 57157197 | 3.3519  | 7.7309  | -1.6615 |
| YRI | PRR20A | 57162197 | 4.6218  | 8.7392  | -1.3957 |
| YRI | PRR20A | 57167197 | 7.2056  | 12.2685 | -1.2503 |
| YRI | PRR20A | 57172197 | 5.9871  | 11.2602 | -1.4116 |
| YRI | PRR20A | 57177197 | 4.5766  | 9.2434  | -1.5019 |
| YRI | PRR20A | 57182197 | 4.6552  | 9.2434  | -1.4766 |
| YRI | PRR20A | 57187197 | 4.1354  | 8.067   | -1.4347 |
| YRI | PRR20A | 57192197 | 3.798   | 8.7392  | -1.6749 |
| YRI | PRR20A | 57197197 | 6.3017  | 10.756  | -1.2447 |
| YRI | PRR20A | 57202197 | 5.9393  | 10.4199 | -1.2898 |
| YRI | PRR20A | 57207197 | 6.1568  | 12.1005 | -1.487  |
| YRI | PRR20A | 57212197 | 6.0799  | 11.0921 | -1.3608 |

## 2\_TajimasD\_data

|     |        |          |        |         |         |
|-----|--------|----------|--------|---------|---------|
| YRI | PRR20A | 57217197 | 3.384  | 6.2183  | -1.3103 |
| YRI | PRR20A | 57222197 | 3.2754 | 7.0586  | -1.5596 |
| YRI | PRR20A | 57227197 | 4.6077 | 9.7476  | -1.5745 |
| YRI | PRR20A | 57232197 | 4.0254 | 9.0754  | -1.6531 |
| YRI | PRR20A | 57237197 | 2.3959 | 6.8906  | -1.8939 |
| YRI | PRR20A | 57242197 | 5.3977 | 7.0586  | -0.6847 |
| YRI | PRR20A | 57247197 | 5.8832 | 7.5628  | -0.6502 |
| YRI | PRR20A | 57252197 | 3.7756 | 6.8906  | -1.3126 |
| YRI | PRR20A | 57257197 | 4.0242 | 7.8989  | -1.4415 |
| YRI | PRR20A | 57262197 | 4.5204 | 9.2434  | -1.52   |
| YRI | PRR20A | 57267197 | 4.0833 | 8.067   | -1.4537 |
| YRI | PRR20A | 57272197 | 3.1071 | 7.7309  | -1.7544 |
| YRI | PRR20A | 57277197 | 4.5299 | 9.2434  | -1.5169 |
| YRI | PRR20A | 57282197 | 4.9193 | 8.067   | -1.1486 |
| YRI | PRR20A | 57287197 | 3.1476 | 6.5544  | -1.502  |
| YRI | PRR20A | 57292197 | 3.38   | 6.7225  | -1.4403 |
| YRI | PRR20A | 57297197 | 4.7742 | 7.2267  | -0.9896 |
| YRI | PRR20A | 57302197 | 4.2777 | 6.7225  | -1.0535 |
| YRI | PRR20A | 57307197 | 3.1372 | 6.7225  | -1.5449 |
| YRI | PRR20A | 57312197 | 3.8708 | 6.7225  | -1.2288 |
| YRI | PRR20A | 57317197 | 5.0761 | 7.3947  | -0.9162 |
| YRI | PRR20A | 57322197 | 4.2093 | 8.7392  | -1.5355 |
| YRI | PRR20A | 57327197 | 4.1423 | 8.067   | -1.4321 |
| YRI | PRR20A | 57332197 | 5.7295 | 7.5628  | -0.7097 |
| YRI | PRR20A | 57337197 | 5.9235 | 9.5795  | -1.1382 |
| YRI | PRR20A | 57342197 | 6.9996 | 10.924  | -1.0809 |
| YRI | PRR20A | 57347197 | 7.3713 | 8.7392  | -0.4637 |
| YRI | PRR20A | 57352197 | 6.0536 | 8.5712  | -0.8688 |
| YRI | PRR20A | 57357197 | 6.6483 | 8.067   | -0.5177 |
| YRI | PRR20A | 57362197 | 5.4927 | 6.7225  | -0.5299 |
| YRI | PRR20A | 57367197 | 2.9781 | 6.5544  | -1.5767 |
| YRI | PRR20A | 57372197 | 2.6922 | 6.5544  | -1.7028 |
| YRI | PRR20A | 57377197 | 4.9849 | 8.7392  | -1.2726 |
| YRI | PRR20A | 57382197 | 4.0901 | 7.5628  | -1.3444 |
| YRI | PRR20A | 57387197 | 3.152  | 6.5544  | -1.5    |
| YRI | PRR20A | 57392197 | 6.8262 | 10.0837 | -0.9669 |
| YRI | PRR20A | 57397197 | 8.1899 | 10.0837 | -0.5621 |
| YRI | PRR20A | 57402197 | 8.4499 | 11.4282 | -0.7863 |
| YRI | PRR20A | 57407197 | 7.0346 | 11.7644 | -1.2151 |
| YRI | PRR20A | 57412197 | 6.558  | 9.5795  | -0.9407 |
| YRI | PRR20A | 57417197 | 7.5594 | 9.5795  | -0.6289 |
| YRI | PRR20A | 57422197 | 5.456  | 7.8989  | -0.9088 |
| YRI | PRR20A | 57427197 | 4.8048 | 8.067   | -1.1904 |
| YRI | PRR20A | 57432197 | 5.8579 | 9.4115  | -1.1247 |
| YRI | PRR20A | 57437197 | 4.8133 | 9.2434  | -1.4257 |
| YRI | PRR20A | 57442197 | 5.2572 | 10.5879 | -1.5118 |
| YRI | PRR20A | 57447197 | 8.532  | 11.5963 | -0.798  |
| YRI | PRR20A | 57452197 | 9.0587 | 10.4199 | -0.3918 |
| YRI | PRR20A | 57457197 | 5.7942 | 8.7392  | -0.9983 |

## 2\_TajimasD\_data

|     |        |          |         |         |         |
|-----|--------|----------|---------|---------|---------|
| YRI | PRR20A | 57462197 | 4.3763  | 8.235   | -1.3816 |
| YRI | PRR20A | 57467197 | 5.1548  | 7.7309  | -0.9774 |
| YRI | PRR20A | 57472197 | 6.4074  | 9.9157  | -1.0578 |
| YRI | PRR20A | 57477197 | 5.4147  | 9.5795  | -1.2966 |
| YRI | PRR20A | 57482197 | 4.3395  | 7.0586  | -1.1209 |
| YRI | PRR20A | 57487197 | 5.0135  | 8.235   | -1.1535 |
| YRI | PRR20A | 57492197 | 4.7814  | 8.7392  | -1.3416 |
| YRI | PRR20A | 57497197 | 5.7195  | 9.0754  | -1.0985 |
| YRI | PRR20A | 57502197 | 7.5525  | 9.4115  | -0.5884 |
| YRI | PRR20A | 57507197 | 6.9293  | 8.9073  | -0.6588 |
| YRI | PRR20A | 57512197 | 5.5667  | 7.8989  | -0.8676 |
| YRI | PRR20A | 57517197 | 7.7916  | 7.5628  | 0.0886  |
| YRI | PRR20A | 57522197 | 7.8139  | 9.4115  | -0.5056 |
| YRI | PRR20A | 57527197 | 5.9641  | 11.2602 | -1.4178 |
| YRI | PRR20A | 57532197 | 5.9362  | 11.5963 | -1.4739 |
| YRI | PRR20A | 57537197 | 6.9074  | 12.4366 | -1.348  |
| YRI | PRR20A | 57542197 | 7.6205  | 12.2685 | -1.1478 |
| YRI | PRR20A | 57547197 | 6.5054  | 11.7644 | -1.3511 |
| YRI | PRR20A | 57552197 | 9.8287  | 13.7811 | -0.8744 |
| YRI | PRR20A | 57557197 | 14.5395 | 16.9743 | -0.4416 |
| YRI | PRR20A | 57562197 | 14.2368 | 16.302  | -0.3893 |
| YRI | PRR20A | 57567197 | 14.049  | 15.1256 | -0.218  |
| YRI | PRR20A | 57572197 | 14.5502 | 14.6214 | -0.0149 |
| YRI | PRR20A | 57577197 | 14.7968 | 14.2853 | 0.1094  |
| YRI | PRR20A | 57582197 | 12.1353 | 12.6047 | -0.113  |
| YRI | PRR20A | 57587197 | 10.412  | 11.2602 | -0.2271 |
| YRI | PRR20A | 57592197 | 10.2289 | 11.4282 | -0.3166 |
| YRI | PRR20A | 57597197 | 9.8356  | 10.756  | -0.2572 |
| YRI | PRR20A | 57602197 | 11.3454 | 12.1005 | -0.1889 |
| YRI | PRR20A | 57607197 | 9.8468  | 12.9408 | -0.7265 |
| YRI | PRR20A | 57612197 | 8.4593  | 11.9324 | -0.8804 |
| YRI | PRR20A | 57617197 | 8.0339  | 11.7644 | -0.9584 |
| YRI | PRR20A | 57622197 | 6.0834  | 9.7476  | -1.1225 |
| YRI | PRR20A | 57627197 | 4.4775  | 8.7392  | -1.4446 |
| YRI | PRR20A | 57632197 | 6.0929  | 10.2518 | -1.2155 |
| YRI | PRR20A | 57637197 | 9.133   | 10.4199 | -0.3705 |
| YRI | PRR20A | 57642197 | 6.7951  | 10.0837 | -0.9761 |
| YRI | PRR20A | 57647197 | 5.4511  | 9.5795  | -1.2853 |
| YRI | PRR20A | 57652197 | 9.7786  | 12.7727 | -0.7118 |
| YRI | PRR20A | 57657197 | 12.6904 | 14.4534 | -0.3728 |
| YRI | PRR20A | 57662197 | 10.9739 | 12.6047 | -0.3926 |
| CEU | PSG3   | 42226642 | 7.7875  | 7.6753  | 0.0431  |
| CEU | PSG3   | 42231642 | 8.4106  | 6.9931  | 0.5931  |
| CEU | PSG3   | 42236642 | 6.6601  | 5.9697  | 0.3332  |
| CEU | PSG3   | 42241642 | 6.9066  | 7.5047  | -0.2347 |
| CEU | PSG3   | 42246642 | 6.1952  | 8.3576  | -0.7687 |
| CEU | PSG3   | 42251642 | 5.9052  | 5.9697  | -0.0311 |
| CEU | PSG3   | 42256642 | 8.0544  | 5.2874  | 1.4878  |
| CEU | PSG3   | 42261642 | 10.3067 | 7.8459  | 0.927   |

## 2\_TajimasD\_data

|     |      |          |         |         |         |
|-----|------|----------|---------|---------|---------|
| CEU | PSG3 | 42266642 | 8.8547  | 7.3342  | 0.6092  |
| CEU | PSG3 | 42271642 | 8.2319  | 6.3108  | 0.882   |
| CEU | PSG3 | 42276642 | 7.941   | 6.4814  | 0.6542  |
| CEU | PSG3 | 42281642 | 4.7778  | 6.1402  | -0.6411 |
| CEU | PSG3 | 42286642 | 2.3671  | 7.1636  | -1.9634 |
| CEU | PSG3 | 42291642 | 2.0864  | 5.6286  | -1.8018 |
| CEU | PSG3 | 42296642 | 1.2863  | 3.4112  | -1.6689 |
| CEU | PSG3 | 42301642 | 4.4884  | 5.1169  | -0.3479 |
| CEU | PSG3 | 42306642 | 16.658  | 9.3809  | 2.3248  |
| CEU | PSG3 | 42311642 | 17.537  | 9.3809  | 2.6056  |
| CEU | PSG3 | 42316642 | 12.3183 | 7.5047  | 1.8886  |
| CEU | PSG3 | 42321642 | 12.7042 | 7.8459  | 1.8302  |
| CEU | PSG3 | 42326642 | 11.1925 | 8.187   | 1.0888  |
| CEU | PSG3 | 42331642 | 9.1029  | 7.6753  | 0.5487  |
| CEU | PSG3 | 42336642 | 7.8132  | 5.9697  | 0.8897  |
| CEU | PSG3 | 42341642 | 9.9882  | 5.7991  | 2.0748  |
| CEU | PSG3 | 42346642 | 9.1006  | 5.7991  | 1.6352  |
| CEU | PSG3 | 42351642 | 4.9396  | 4.9463  | -0.0038 |
| CEU | PSG3 | 42356642 | 6.1944  | 4.9463  | 0.7118  |
| CEU | PSG3 | 42361642 | 9.3886  | 5.2874  | 2.2052  |
| CEU | PSG3 | 42366642 | 9.2872  | 6.8225  | 1.0546  |
| CEU | PSG3 | 42371642 | 8.8996  | 9.0398  | -0.0464 |
| CEU | PSG3 | 42376642 | 6.7759  | 6.9931  | -0.0909 |
| CEU | PSG3 | 42381642 | 5.1224  | 4.9463  | 0.1004  |
| CEU | PSG3 | 42386642 | 4.0548  | 4.0935  | -0.026  |
| CEU | PSG3 | 42391642 | 2.2785  | 6.1402  | -1.8172 |
| CEU | PSG3 | 42396642 | 2.3787  | 11.0866 | -2.3803 |
| CEU | PSG3 | 42401642 | 2.6182  | 8.6987  | -2.0831 |
| CEU | PSG3 | 42406642 | 1.2663  | 4.4346  | -1.9879 |
| CEU | PSG3 | 42411642 | 0.6988  | 4.9463  | -2.4223 |
| CEU | PSG3 | 42416642 | 2.4541  | 7.6753  | -2.0069 |
| CEU | PSG3 | 42421642 | 4.3269  | 9.3809  | -1.6146 |
| CEU | PSG3 | 42426642 | 3.9864  | 7.3342  | -1.3414 |
| CEU | PSG3 | 42431642 | 4.5953  | 4.9463  | -0.2002 |
| CEU | PSG3 | 42436642 | 5.6436  | 5.2874  | 0.1915  |
| CEU | PSG3 | 42441642 | 3.4195  | 4.6052  | -0.7199 |
| CEU | PSG3 | 42446642 | 1.7854  | 3.0701  | -1.102  |
| CEU | PSG3 | 42451642 | 3.1861  | 3.9229  | -0.5139 |
| CEU | PSG3 | 42456642 | 3.7565  | 5.458   | -0.8895 |
| CEU | PSG3 | 42461642 | 3.6644  | 5.6286  | -0.9991 |
| CEU | PSG3 | 42466642 | 5.7697  | 5.1169  | 0.3613  |
| CEU | PSG3 | 42471642 | 6.0429  | 5.9697  | 0.0353  |
| CEU | PSG3 | 42476642 | 3.0651  | 4.7757  | -1.0061 |
| CEU | PSG3 | 42481642 | 1.4735  | 3.7524  | -1.651  |
| CEU | PSG3 | 42486642 | 1.6242  | 4.7757  | -1.8535 |
| CEU | PSG3 | 42491642 | 1.3663  | 4.0935  | -1.8338 |
| CEU | PSG3 | 42496642 | 0.8031  | 3.9229  | -2.176  |
| CEU | PSG3 | 42501642 | 0.8852  | 4.2641  | -2.1934 |
| CEU | PSG3 | 42506642 | 1.1859  | 3.7524  | -1.8594 |



## 2\_TajimasD\_data

|     |      |          |        |        |         |
|-----|------|----------|--------|--------|---------|
| CEU | PSG3 | 42511642 | 1.5685 | 4.9463 | -1.9264 |
| CEU | PSG3 | 42516642 | 1.9177 | 5.7991 | -1.9224 |
| CEU | PSG3 | 42521642 | 1.1721 | 3.0701 | -1.6281 |
| CEU | PSG3 | 42526642 | 0.4261 | 2.2173 | -2.0011 |
| CEU | PSG3 | 42531642 | 0.9095 | 3.4112 | -1.9649 |
| CEU | PSG3 | 42536642 | 0.9299 | 3.9229 | -2.0875 |
| CEU | PSG3 | 42541642 | 1.1998 | 3.9229 | -1.8993 |
| CEU | PSG3 | 42546642 | 1.6248 | 3.5818 | -1.475  |
| CEU | PSG3 | 42551642 | 1.2929 | 3.4112 | -1.6638 |
| CEU | PSG3 | 42556642 | 1.0229 | 3.2407 | -1.8185 |
| CEU | PSG3 | 42561642 | 1.3173 | 4.4346 | -1.9559 |
| CEU | PSG3 | 42566642 | 1.2552 | 4.2641 | -1.9532 |
| CEU | PSG3 | 42571642 | 1.2325 | 4.4346 | -2.0091 |
| CEU | PSG3 | 42576642 | 1.8369 | 5.2874 | -1.8553 |
| CEU | PSG3 | 42581642 | 1.2643 | 3.9229 | -1.8543 |
| CEU | PSG3 | 42586642 | 1.5213 | 3.5818 | -1.553  |
| CEU | PSG3 | 42591642 | 1.988  | 4.7757 | -1.6396 |
| CEU | PSG3 | 42596642 | 1.221  | 4.2641 | -1.9754 |
| CEU | PSG3 | 42601642 | 1.2876 | 3.0701 | -1.529  |
| CEU | PSG3 | 42606642 | 1.4486 | 3.2407 | -1.4695 |
| CEU | PSG3 | 42611642 | 1.0369 | 3.9229 | -2.0129 |
| CEU | PSG3 | 42616642 | 0.4205 | 2.729  | -2.182  |
| CEU | PSG3 | 42621642 | 0.4141 | 1.7056 | -1.7689 |
| CEU | PSG3 | 42626642 | 0.4444 | 2.3879 | -2.0467 |
| CEU | PSG3 | 42631642 | 0.3682 | 2.3879 | -2.127  |
| CEU | PSG3 | 42636642 | 1.5438 | 3.7524 | -1.6001 |
| CEU | PSG3 | 42641642 | 2.1367 | 4.0935 | -1.3158 |
| CEU | PSG3 | 42646642 | 1.9876 | 4.6052 | -1.5893 |
| CEU | PSG3 | 42651642 | 2.5766 | 6.1402 | -1.6769 |
| CEU | PSG3 | 42656642 | 3.147  | 6.1402 | -1.4085 |
| CEU | PSG3 | 42661642 | 2.6873 | 5.1169 | -1.3448 |
| CEU | PSG3 | 42666642 | 2.2975 | 4.6052 | -1.4011 |
| CEU | PSG3 | 42671642 | 3.247  | 4.7757 | -0.8991 |
| CEU | PSG3 | 42676642 | 3.033  | 4.0935 | -0.7131 |
| CEU | PSG3 | 42681642 | 2.0773 | 4.0935 | -1.3558 |
| CEU | PSG3 | 42686642 | 2.2816 | 4.2641 | -1.2869 |
| CEU | PSG3 | 42691642 | 2.1744 | 4.7757 | -1.5299 |
| CEU | PSG3 | 42696642 | 2.0418 | 5.6286 | -1.8245 |
| CEU | PSG3 | 42701642 | 1.9647 | 5.458  | -1.8262 |
| CEU | PSG3 | 42706642 | 1.9705 | 5.6286 | -1.8607 |
| CEU | PSG3 | 42711642 | 2.1942 | 6.9931 | -2.0079 |
| CEU | PSG3 | 42716642 | 1.4082 | 4.9463 | -2.0178 |
| CEU | PSG3 | 42721642 | 0.8699 | 2.5584 | -1.682  |
| CEU | PSG3 | 42726642 | 1.5873 | 2.8996 | -1.1802 |
| CEU | PSG3 | 42731642 | 1.5941 | 3.2407 | -1.3502 |
| CEU | PSG3 | 42736642 | 2.287  | 4.2641 | -1.2834 |
| CEU | PSG3 | 42741642 | 2.1072 | 4.0935 | -1.3356 |
| CEU | PSG3 | 42746642 | 1.1218 | 4.0935 | -1.9983 |
| CEU | PSG3 | 42751642 | 1.7359 | 5.6286 | -1.9801 |

## 2\_TajimasD\_data

|     |      |          |        |         |         |
|-----|------|----------|--------|---------|---------|
| CEU | PSG3 | 42756642 | 1.4698 | 6.4814  | -2.2463 |
| CEU | PSG3 | 42761642 | 1.8833 | 7.5047  | -2.2056 |
| CEU | PSG3 | 42766642 | 2.4292 | 8.6987  | -2.1479 |
| CEU | PSG3 | 42771642 | 1.4669 | 6.9931  | -2.3123 |
| CEU | PSG3 | 42776642 | 0.6479 | 4.6052  | -2.4027 |
| CEU | PSG3 | 42781642 | 0.5613 | 4.7757  | -2.4787 |
| CEU | PSG3 | 42786642 | 0.8584 | 5.7991  | -2.4471 |
| CEU | PSG3 | 42791642 | 1.276  | 5.7991  | -2.2403 |
| CEU | PSG3 | 42796642 | 1.4139 | 4.7757  | -1.9772 |
| CEU | PSG3 | 42801642 | 1.3828 | 4.2641  | -1.8704 |
| CEU | PSG3 | 42806642 | 1.2727 | 4.4346  | -1.9839 |
| CEU | PSG3 | 42811642 | 0.8757 | 4.2641  | -2.1996 |
| CEU | PSG3 | 42816642 | 0.6211 | 4.7757  | -2.4435 |
| CEU | PSG3 | 42821642 | 0.7922 | 7.5047  | -2.6337 |
| CEU | PSG3 | 42826642 | 1.4776 | 6.6519  | -2.2654 |
| CEU | PSG3 | 42831642 | 1.7675 | 4.7757  | -1.7692 |
| CEU | PSG3 | 42836642 | 0.8813 | 4.0935  | -2.16   |
| CEU | PSG3 | 42841642 | 0.4618 | 4.4346  | -2.4927 |
| CEU | PSG3 | 42846642 | 1.1126 | 6.4814  | -2.4064 |
| CEU | PSG3 | 42851642 | 1.4632 | 5.6286  | -2.1188 |
| CEU | PSG3 | 42856642 | 1.0515 | 4.6052  | -2.1576 |
| CEU | PSG3 | 42861642 | 1.0247 | 4.2641  | -2.1028 |
| CEU | PSG3 | 42866642 | 1.8396 | 5.6286  | -1.9273 |
| CEU | PSG3 | 42871642 | 1.8371 | 8.0164  | -2.2824 |
| CEU | PSG3 | 42876642 | 1.0299 | 8.0164  | -2.5805 |
| CEU | PSG3 | 42881642 | 1.5463 | 7.3342  | -2.319  |
| CEU | PSG3 | 42886642 | 2.5022 | 9.0398  | -2.1615 |
| CEU | PSG3 | 42891642 | 3.121  | 10.5749 | -2.1297 |
| CEU | PSG3 | 42896642 | 2.3665 | 8.5281  | -2.1499 |
| CEU | PSG3 | 42901642 | 1.3642 | 6.6519  | -2.3151 |
| CEU | PSG3 | 42906642 | 1.1512 | 6.8225  | -2.4267 |
| CEU | PSG3 | 42911642 | 1.6252 | 7.1636  | -2.2671 |
| CEU | PSG3 | 42916642 | 1.589  | 7.1636  | -2.282  |
| CEU | PSG3 | 42921642 | 0.5011 | 6.4814  | -2.6805 |
| CEU | PSG3 | 42926642 | 0.5395 | 5.9697  | -2.6207 |
| CEU | PSG3 | 42931642 | 1.8163 | 6.1402  | -2.0347 |
| CEU | PSG3 | 42936642 | 3.5834 | 6.6519  | -1.3434 |
| CEU | PSG3 | 42941642 | 2.853  | 7.6753  | -1.8536 |
| CEU | PSG3 | 42946642 | 1.4871 | 7.5047  | -2.361  |
| CEU | PSG3 | 42951642 | 1.4968 | 7.1636  | -2.3197 |
| CEU | PSG3 | 42956642 | 1.5811 | 7.3342  | -2.3051 |
| CEU | PSG3 | 42961642 | 1.6613 | 7.3342  | -2.273  |
| CEU | PSG3 | 42966642 | 1.4063 | 7.8459  | -2.4259 |
| CEU | PSG3 | 42971642 | 1.2602 | 6.6519  | -2.3606 |
| CEU | PSG3 | 42976642 | 1.369  | 5.2874  | -2.1069 |
| CEU | PSG3 | 42981642 | 2.0363 | 5.7991  | -1.8637 |
| CEU | PSG3 | 42986642 | 2.4613 | 5.6286  | -1.6111 |
| CEU | PSG3 | 42991642 | 2.0524 | 4.2641  | -1.4357 |
| CEU | PSG3 | 42996642 | 1.8258 | 5.6286  | -1.9343 |

## 2\_TajimasD\_data

|     |      |          |        |         |         |
|-----|------|----------|--------|---------|---------|
| CEU | PSG3 | 43001642 | 1.972  | 7.3342  | -2.1485 |
| CEU | PSG3 | 43006642 | 2.1047 | 6.3108  | -1.9311 |
| CEU | PSG3 | 43011642 | 1.5958 | 4.7757  | -1.8702 |
| CEU | PSG3 | 43016642 | 0.893  | 4.4346  | -2.2221 |
| CEU | PSG3 | 43021642 | 1.0517 | 5.7991  | -2.3514 |
| CEU | PSG3 | 43026642 | 2.1107 | 7.3342  | -2.0929 |
| CEU | PSG3 | 43031642 | 2.2717 | 6.1402  | -1.8204 |
| CEU | PSG3 | 43036642 | 1.5224 | 4.7757  | -1.9134 |
| CEU | PSG3 | 43041642 | 2.1657 | 5.1169  | -1.6335 |
| CEU | PSG3 | 43046642 | 3.1043 | 6.1402  | -1.4286 |
| CEU | PSG3 | 43051642 | 3.0476 | 7.3342  | -1.7175 |
| CEU | PSG3 | 43056642 | 2.3511 | 7.1636  | -1.97   |
| CEU | PSG3 | 43061642 | 2.0509 | 7.6753  | -2.1619 |
| CEU | PSG3 | 43066642 | 1.666  | 6.3108  | -2.1325 |
| CEU | PSG3 | 43071642 | 0.8169 | 4.7757  | -2.3283 |
| CEU | PSG3 | 43076642 | 1.3471 | 4.9463  | -2.0526 |
| CEU | PSG3 | 43081642 | 2.028  | 4.9463  | -1.6643 |
| CEU | PSG3 | 43086642 | 2.3249 | 6.9931  | -1.9533 |
| CEU | PSG3 | 43091642 | 2.0361 | 7.6753  | -2.1676 |
| CEU | PSG3 | 43096642 | 1.4463 | 6.3108  | -2.2334 |
| CEU | PSG3 | 43101642 | 1.8606 | 5.6286  | -1.9166 |
| CEU | PSG3 | 43106642 | 1.818  | 4.6052  | -1.6922 |
| CEU | PSG3 | 43111642 | 1.9171 | 4.9463  | -1.7276 |
| CEU | PSG3 | 43116642 | 2.5147 | 5.6286  | -1.5839 |
| CEU | PSG3 | 43121642 | 2.0629 | 4.7757  | -1.5955 |
| CEU | PSG3 | 43126642 | 2.108  | 5.458   | -1.7513 |
| CEU | PSG3 | 43131642 | 2.2323 | 6.3108  | -1.8725 |
| CEU | PSG3 | 43136642 | 2.7934 | 7.3342  | -1.8194 |
| CEU | PSG3 | 43141642 | 4.2907 | 8.5281  | -1.4785 |
| CEU | PSG3 | 43146642 | 4.2486 | 7.8459  | -1.3552 |
| CEU | PSG3 | 43151642 | 3.3441 | 7.3342  | -1.5987 |
| CEU | PSG3 | 43156642 | 2.4343 | 6.9931  | -1.9075 |
| CEU | PSG3 | 43161642 | 1.2849 | 5.2874  | -2.1522 |
| CEU | PSG3 | 43166642 | 1.7444 | 5.2874  | -1.9051 |
| CEU | PSG3 | 43171642 | 2.3729 | 5.9697  | -1.7359 |
| CEU | PSG3 | 43176642 | 2.2484 | 6.8225  | -1.9572 |
| CEU | PSG3 | 43181642 | 2.3572 | 8.187   | -2.112  |
| CEU | PSG3 | 43186642 | 2.2608 | 7.3342  | -2.0328 |
| CEU | PSG3 | 43191642 | 2.1012 | 5.458   | -1.7549 |
| CEU | PSG3 | 43196642 | 2.2896 | 6.1402  | -1.812  |
| CEU | PSG3 | 43201642 | 3.1717 | 8.3576  | -1.8434 |
| CEU | PSG3 | 43206642 | 3.1989 | 7.8459  | -1.7506 |
| CEU | PSG3 | 43211642 | 2.1346 | 6.8225  | -2.0059 |
| CEU | PSG3 | 43216642 | 2.2801 | 8.0164  | -2.1187 |
| CEU | PSG3 | 43221642 | 2.7932 | 9.0398  | -2.0653 |
| CEU | PSG3 | 43226642 | 2.8264 | 9.3809  | -2.0939 |
| CEU | PSG3 | 43231642 | 2.7293 | 10.7454 | -2.2563 |
| CHB | PSG3 | 42226642 | 6.0891 | 7.4543  | -0.5374 |
| CHB | PSG3 | 42231642 | 6.4418 | 6.7766  | -0.1437 |

## 2\_TajimasD\_data

|     |      |          |         |         |         |
|-----|------|----------|---------|---------|---------|
| CHB | PSG3 | 42236642 | 4.9636  | 5.7601  | -0.3957 |
| CHB | PSG3 | 42241642 | 5.6813  | 5.9295  | -0.1202 |
| CHB | PSG3 | 42246642 | 5.1496  | 5.0825  | 0.0373  |
| CHB | PSG3 | 42251642 | 5.159   | 8.979   | -1.2672 |
| CHB | PSG3 | 42256642 | 7.5288  | 11.8591 | -1.1079 |
| CHB | PSG3 | 42261642 | 9.6391  | 9.6567  | -0.0055 |
| CHB | PSG3 | 42266642 | 8.1628  | 6.946   | 0.5108  |
| CHB | PSG3 | 42271642 | 7.9073  | 8.1319  | -0.0816 |
| CHB | PSG3 | 42276642 | 7.7304  | 9.3178  | -0.5088 |
| CHB | PSG3 | 42281642 | 4.4906  | 7.7931  | -1.2482 |
| CHB | PSG3 | 42286642 | 2.0272  | 8.6402  | -2.2731 |
| CHB | PSG3 | 42291642 | 1.6926  | 8.1319  | -2.3405 |
| CHB | PSG3 | 42296642 | 1.209   | 6.6072  | -2.3709 |
| CHB | PSG3 | 42301642 | 4.6168  | 8.3013  | -1.3141 |
| CHB | PSG3 | 42306642 | 17.5069 | 11.6896 | 1.5086  |
| CHB | PSG3 | 42311642 | 18.0699 | 11.012  | 1.9359  |
| CHB | PSG3 | 42316642 | 11.909  | 9.3178  | 0.8306  |
| CHB | PSG3 | 42321642 | 12.4148 | 8.4708  | 1.3807  |
| CHB | PSG3 | 42326642 | 11.1734 | 7.7931  | 1.2776  |
| CHB | PSG3 | 42331642 | 9.34    | 6.6072  | 1.2003  |
| CHB | PSG3 | 42336642 | 8.1155  | 5.4213  | 1.4128  |
| CHB | PSG3 | 42341642 | 10.2935 | 6.2684  | 1.8538  |
| CHB | PSG3 | 42346642 | 9.1679  | 6.4378  | 1.2275  |
| CHB | PSG3 | 42351642 | 4.6092  | 5.9295  | -0.6392 |
| CHB | PSG3 | 42356642 | 5.8964  | 6.2684  | -0.1713 |
| CHB | PSG3 | 42361642 | 9.3012  | 8.3013  | 0.3566  |
| CHB | PSG3 | 42366642 | 9.1321  | 8.8096  | 0.1089  |
| CHB | PSG3 | 42371642 | 8.3389  | 6.7766  | 0.6706  |
| CHB | PSG3 | 42376642 | 6.3451  | 5.5907  | 0.3849  |
| CHB | PSG3 | 42381642 | 5.3874  | 5.2519  | 0.0731  |
| CHB | PSG3 | 42386642 | 4.809   | 4.5742  | 0.143   |
| CHB | PSG3 | 42391642 | 6.6675  | 5.7601  | 0.4508  |
| CHB | PSG3 | 42396642 | 13.7725 | 10.3343 | 1.0008  |
| CHB | PSG3 | 42401642 | 12.2237 | 9.6567  | 0.796   |
| CHB | PSG3 | 42406642 | 4.8749  | 4.913   | -0.0218 |
| CHB | PSG3 | 42411642 | 4.8391  | 5.0825  | -0.1351 |
| CHB | PSG3 | 42416642 | 6.261   | 5.5907  | 0.342   |
| CHB | PSG3 | 42421642 | 9.964   | 8.1319  | 0.6659  |
| CHB | PSG3 | 42426642 | 7.719   | 7.6237  | 0.0368  |
| CHB | PSG3 | 42431642 | 3.0729  | 3.8965  | -0.576  |
| CHB | PSG3 | 42436642 | 3.6884  | 4.7436  | -0.6224 |
| CHB | PSG3 | 42441642 | 1.969   | 4.2354  | -1.4754 |
| CHB | PSG3 | 42446642 | 1.0552  | 2.8801  | -1.6453 |
| CHB | PSG3 | 42451642 | 1.9029  | 3.8965  | -1.3944 |
| CHB | PSG3 | 42456642 | 2.2593  | 5.0825  | -1.5674 |
| CHB | PSG3 | 42461642 | 2.5494  | 4.066   | -1.0227 |
| CHB | PSG3 | 42466642 | 4.0017  | 4.913   | -0.5213 |
| CHB | PSG3 | 42471642 | 4.4778  | 6.946   | -1.0361 |
| CHB | PSG3 | 42476642 | 2.363   | 5.5907  | -1.6468 |

## 2\_TajimasD\_data

|     |      |          |        |        |         |
|-----|------|----------|--------|--------|---------|
| CHB | PSG3 | 42481642 | 0.7729 | 4.2354 | -2.2541 |
| CHB | PSG3 | 42486642 | 1.4325 | 4.7436 | -1.9531 |
| CHB | PSG3 | 42491642 | 1.3099 | 4.2354 | -1.9045 |
| CHB | PSG3 | 42496642 | 0.6235 | 3.0495 | -2.0864 |
| CHB | PSG3 | 42501642 | 0.5812 | 2.8801 | -2.0727 |
| CHB | PSG3 | 42506642 | 0.6947 | 2.5412 | -1.8439 |
| CHB | PSG3 | 42511642 | 1.0213 | 3.7271 | -1.9657 |
| CHB | PSG3 | 42516642 | 1.3404 | 4.4048 | -1.9283 |
| CHB | PSG3 | 42521642 | 1.1323 | 3.5577 | -1.833  |
| CHB | PSG3 | 42526642 | 0.6884 | 3.8965 | -2.2438 |
| CHB | PSG3 | 42531642 | 0.6853 | 3.5577 | -2.1708 |
| CHB | PSG3 | 42536642 | 0.6305 | 3.5577 | -2.2122 |
| CHB | PSG3 | 42541642 | 0.9614 | 4.5742 | -2.1999 |
| CHB | PSG3 | 42546642 | 1.1365 | 4.2354 | -2.0174 |
| CHB | PSG3 | 42551642 | 0.707  | 4.2354 | -2.297  |
| CHB | PSG3 | 42556642 | 0.7114 | 5.0825 | -2.4267 |
| CHB | PSG3 | 42561642 | 1.3322 | 6.2684 | -2.2734 |
| CHB | PSG3 | 42566642 | 1.2659 | 5.7601 | -2.2328 |
| CHB | PSG3 | 42571642 | 1.1304 | 4.066  | -1.9796 |
| CHB | PSG3 | 42576642 | 1.7733 | 4.913  | -1.7959 |
| CHB | PSG3 | 42581642 | 1.1854 | 5.5907 | -2.2477 |
| CHB | PSG3 | 42586642 | 1.1251 | 5.2519 | -2.2257 |
| CHB | PSG3 | 42591642 | 1.422  | 4.7436 | -1.9593 |
| CHB | PSG3 | 42596642 | 0.5574 | 2.8801 | -2.0942 |
| CHB | PSG3 | 42601642 | 0.6988 | 3.0495 | -2.0216 |
| CHB | PSG3 | 42606642 | 1.1517 | 4.2354 | -2.0075 |
| CHB | PSG3 | 42611642 | 0.7841 | 2.7106 | -1.8255 |
| CHB | PSG3 | 42616642 | 0.3604 | 2.033  | -1.9946 |
| CHB | PSG3 | 42621642 | 0.3735 | 2.2024 | -2.0479 |
| CHB | PSG3 | 42626642 | 0.6495 | 3.0495 | -2.064  |
| CHB | PSG3 | 42631642 | 0.6105 | 4.2354 | -2.3598 |
| CHB | PSG3 | 42636642 | 1.4047 | 6.4378 | -2.263  |
| CHB | PSG3 | 42641642 | 2.3002 | 6.7766 | -1.9216 |
| CHB | PSG3 | 42646642 | 2.0367 | 5.4213 | -1.7748 |
| CHB | PSG3 | 42651642 | 1.8336 | 4.7436 | -1.7165 |
| CHB | PSG3 | 42656642 | 2.2296 | 5.0825 | -1.5839 |
| CHB | PSG3 | 42661642 | 2.0183 | 5.9295 | -1.8935 |
| CHB | PSG3 | 42666642 | 2.2374 | 5.7601 | -1.7502 |
| CHB | PSG3 | 42671642 | 3.3594 | 6.7766 | -1.4669 |
| CHB | PSG3 | 42676642 | 2.442  | 5.5907 | -1.6065 |
| CHB | PSG3 | 42681642 | 1.0813 | 3.8965 | -1.969  |
| CHB | PSG3 | 42686642 | 1.3251 | 4.2354 | -1.8946 |
| CHB | PSG3 | 42691642 | 1.5399 | 4.5742 | -1.8476 |
| CHB | PSG3 | 42696642 | 1.5172 | 4.913  | -1.9424 |
| CHB | PSG3 | 42701642 | 1.5424 | 5.7601 | -2.0954 |
| CHB | PSG3 | 42706642 | 1.4873 | 6.2684 | -2.202  |
| CHB | PSG3 | 42711642 | 1.3507 | 5.4213 | -2.1345 |
| CHB | PSG3 | 42716642 | 0.916  | 4.4048 | -2.1953 |
| CHB | PSG3 | 42721642 | 1.1129 | 5.2519 | -2.2323 |

## 2\_TajimasD\_data

|     |      |          |        |        |         |
|-----|------|----------|--------|--------|---------|
| CHB | PSG3 | 42726642 | 1.6657 | 4.4048 | -1.7236 |
| CHB | PSG3 | 42731642 | 1.2543 | 3.5577 | -1.7408 |
| CHB | PSG3 | 42736642 | 1.7698 | 4.4048 | -1.6581 |
| CHB | PSG3 | 42741642 | 1.7643 | 4.066  | -1.5521 |
| CHB | PSG3 | 42746642 | 1.213  | 5.0825 | -2.1483 |
| CHB | PSG3 | 42751642 | 1.5818 | 6.946  | -2.2517 |
| CHB | PSG3 | 42756642 | 1.1767 | 6.4378 | -2.3656 |
| CHB | PSG3 | 42761642 | 1.4335 | 6.7766 | -2.2936 |
| CHB | PSG3 | 42766642 | 1.7065 | 6.7766 | -2.1764 |
| CHB | PSG3 | 42771642 | 1.0897 | 4.913  | -2.1869 |
| CHB | PSG3 | 42776642 | 0.7152 | 4.066  | -2.2596 |
| CHB | PSG3 | 42781642 | 0.9084 | 4.066  | -2.1293 |
| CHB | PSG3 | 42786642 | 0.8424 | 4.066  | -2.1738 |
| CHB | PSG3 | 42791642 | 0.8896 | 3.8965 | -2.1031 |
| CHB | PSG3 | 42796642 | 1.1395 | 5.2519 | -2.2179 |
| CHB | PSG3 | 42801642 | 1.2006 | 5.2519 | -2.185  |
| CHB | PSG3 | 42806642 | 1.6358 | 4.5742 | -1.7893 |
| CHB | PSG3 | 42811642 | 1.2111 | 4.4048 | -2.0096 |
| CHB | PSG3 | 42816642 | 0.9016 | 4.5742 | -2.2363 |
| CHB | PSG3 | 42821642 | 1.0533 | 5.5907 | -2.3151 |
| CHB | PSG3 | 42826642 | 1.3857 | 4.7436 | -1.9807 |
| CHB | PSG3 | 42831642 | 1.6849 | 4.913  | -1.8465 |
| CHB | PSG3 | 42836642 | 1.0881 | 4.5742 | -2.1228 |
| CHB | PSG3 | 42841642 | 0.9113 | 4.5742 | -2.2304 |
| CHB | PSG3 | 42846642 | 1.0836 | 5.9295 | -2.346  |
| CHB | PSG3 | 42851642 | 1.3402 | 5.7601 | -2.1959 |
| CHB | PSG3 | 42856642 | 1.3998 | 6.946  | -2.3281 |
| CHB | PSG3 | 42861642 | 1.0017 | 6.2684 | -2.4257 |
| CHB | PSG3 | 42866642 | 1.8178 | 5.7601 | -1.9586 |
| CHB | PSG3 | 42871642 | 2.032  | 5.4213 | -1.7772 |
| CHB | PSG3 | 42876642 | 1.2595 | 4.913  | -2.0898 |
| CHB | PSG3 | 42881642 | 1.6804 | 6.6072 | -2.1639 |
| CHB | PSG3 | 42886642 | 2.3548 | 8.3013 | -2.1208 |
| CHB | PSG3 | 42891642 | 3.102  | 8.3013 | -1.8543 |
| CHB | PSG3 | 42896642 | 2.1224 | 5.0825 | -1.6434 |
| CHB | PSG3 | 42901642 | 0.6621 | 3.3883 | -2.1469 |
| CHB | PSG3 | 42906642 | 1.2391 | 4.7436 | -2.0672 |
| CHB | PSG3 | 42911642 | 1.8515 | 5.2519 | -1.8339 |
| CHB | PSG3 | 42916642 | 1.7959 | 7.6237 | -2.2474 |
| CHB | PSG3 | 42921642 | 1.5235 | 8.4708 | -2.4321 |
| CHB | PSG3 | 42926642 | 1.3303 | 6.4378 | -2.2965 |
| CHB | PSG3 | 42931642 | 2.1407 | 6.0989 | -1.8684 |
| CHB | PSG3 | 42936642 | 4.553  | 7.4543 | -1.142  |
| CHB | PSG3 | 42941642 | 4.0034 | 7.7931 | -1.4323 |
| CHB | PSG3 | 42946642 | 1.9143 | 6.0989 | -1.9753 |
| CHB | PSG3 | 42951642 | 2.039  | 6.0989 | -1.9165 |
| CHB | PSG3 | 42956642 | 2.1591 | 6.946  | -2.0094 |
| CHB | PSG3 | 42961642 | 3.4729 | 7.6237 | -1.6007 |
| CHB | PSG3 | 42966642 | 4.126  | 9.8261 | -1.7391 |

## 2\_TajimasD\_data

|     |      |          |        |         |         |
|-----|------|----------|--------|---------|---------|
| CHB | PSG3 | 42971642 | 3.1186 | 8.3013  | -1.8484 |
| CHB | PSG3 | 42976642 | 2.9646 | 5.7601  | -1.3889 |
| CHB | PSG3 | 42981642 | 3.8581 | 6.2684  | -1.1101 |
| CHB | PSG3 | 42986642 | 4.195  | 6.0989  | -0.8987 |
| CHB | PSG3 | 42991642 | 3.5197 | 4.913   | -0.797  |
| CHB | PSG3 | 42996642 | 2.4436 | 4.7436  | -1.3567 |
| CHB | PSG3 | 43001642 | 1.7375 | 5.7601  | -1.9985 |
| CHB | PSG3 | 43006642 | 1.8549 | 6.2684  | -2.0327 |
| CHB | PSG3 | 43011642 | 2.6248 | 5.5907  | -1.5133 |
| CHB | PSG3 | 43016642 | 2.2111 | 4.5742  | -1.4389 |
| CHB | PSG3 | 43021642 | 1.0583 | 4.5742  | -2.1409 |
| CHB | PSG3 | 43026642 | 1.5081 | 5.0825  | -1.9844 |
| CHB | PSG3 | 43031642 | 2.167  | 5.0825  | -1.6186 |
| CHB | PSG3 | 43036642 | 1.6907 | 4.066   | -1.6017 |
| CHB | PSG3 | 43041642 | 2.0301 | 5.0825  | -1.6946 |
| CHB | PSG3 | 43046642 | 2.6313 | 6.4378  | -1.7115 |
| CHB | PSG3 | 43051642 | 2.7287 | 6.6072  | -1.7035 |
| CHB | PSG3 | 43056642 | 2.5108 | 6.2684  | -1.7306 |
| CHB | PSG3 | 43061642 | 2.6823 | 6.6072  | -1.7239 |
| CHB | PSG3 | 43066642 | 2.4609 | 6.0989  | -1.7173 |
| CHB | PSG3 | 43071642 | 1.3482 | 3.7271  | -1.7282 |
| CHB | PSG3 | 43076642 | 1.6137 | 3.3883  | -1.3975 |
| CHB | PSG3 | 43081642 | 2.001  | 4.4048  | -1.5126 |
| CHB | PSG3 | 43086642 | 2.3461 | 7.2848  | -1.9852 |
| CHB | PSG3 | 43091642 | 1.8601 | 6.7766  | -2.1105 |
| CHB | PSG3 | 43096642 | 1.1121 | 4.066   | -1.9919 |
| CHB | PSG3 | 43101642 | 1.6479 | 5.4213  | -1.9787 |
| CHB | PSG3 | 43106642 | 1.8288 | 5.4213  | -1.8838 |
| CHB | PSG3 | 43111642 | 2.2532 | 5.7601  | -1.7423 |
| CHB | PSG3 | 43116642 | 3.1277 | 7.4543  | -1.7031 |
| CHB | PSG3 | 43121642 | 2.8456 | 7.7931  | -1.8699 |
| CHB | PSG3 | 43126642 | 2.9785 | 8.1319  | -1.8731 |
| CHB | PSG3 | 43131642 | 2.964  | 7.1154  | -1.7049 |
| CHB | PSG3 | 43136642 | 2.9446 | 7.6237  | -1.8044 |
| CHB | PSG3 | 43141642 | 4.6202 | 10.6731 | -1.7096 |
| CHB | PSG3 | 43146642 | 4.9562 | 10.1649 | -1.5398 |
| CHB | PSG3 | 43151642 | 3.9029 | 7.9625  | -1.5044 |
| CHB | PSG3 | 43156642 | 3.416  | 6.946   | -1.4818 |
| CHB | PSG3 | 43161642 | 2.1226 | 5.0825  | -1.6433 |
| CHB | PSG3 | 43166642 | 1.8243 | 5.5907  | -1.9217 |
| CHB | PSG3 | 43171642 | 2.4224 | 6.946   | -1.8988 |
| CHB | PSG3 | 43176642 | 2.5345 | 7.6237  | -1.9625 |
| CHB | PSG3 | 43181642 | 2.3911 | 8.1319  | -2.0866 |
| CHB | PSG3 | 43186642 | 2.2433 | 7.7931  | -2.0975 |
| CHB | PSG3 | 43191642 | 2.0824 | 6.7766  | -2.0151 |
| CHB | PSG3 | 43196642 | 2.0506 | 5.7601  | -1.843  |
| CHB | PSG3 | 43201642 | 1.92   | 6.4378  | -2.0314 |
| CHB | PSG3 | 43206642 | 1.6535 | 7.2848  | -2.2636 |
| CHB | PSG3 | 43211642 | 1.4304 | 8.6402  | -2.4783 |

## 2\_TajimasD\_data

|     |      |          |         |         |         |
|-----|------|----------|---------|---------|---------|
| CHB | PSG3 | 43216642 | 1.5069  | 10.3343 | -2.5695 |
| CHB | PSG3 | 43221642 | 1.9027  | 11.5202 | -2.5286 |
| CHB | PSG3 | 43226642 | 1.609   | 11.6896 | -2.6142 |
| CHB | PSG3 | 43231642 | 1.344   | 11.3508 | -2.6678 |
| YRI | PSG3 | 42226642 | 12.5882 | 15.7978 | -0.6235 |
| YRI | PSG3 | 42231642 | 11.2936 | 13.7811 | -0.5503 |
| YRI | PSG3 | 42236642 | 9.9231  | 13.1089 | -0.739  |
| YRI | PSG3 | 42241642 | 12.6648 | 17.8146 | -0.8918 |
| YRI | PSG3 | 42246642 | 13.1778 | 19.6633 | -1.0214 |
| YRI | PSG3 | 42251642 | 21.3631 | 19.9994 | 0.2113  |
| YRI | PSG3 | 42256642 | 21.9772 | 17.1423 | 0.8687  |
| YRI | PSG3 | 42261642 | 12.9618 | 13.613  | -0.1458 |
| YRI | PSG3 | 42266642 | 9.451   | 11.7644 | -0.5943 |
| YRI | PSG3 | 42271642 | 7.508   | 12.4366 | -1.2016 |
| YRI | PSG3 | 42276642 | 8.1186  | 13.9492 | -1.2752 |
| YRI | PSG3 | 42281642 | 9.4181  | 11.2602 | -0.4931 |
| YRI | PSG3 | 42286642 | 9.9232  | 9.9157  | 0.0023  |
| YRI | PSG3 | 42291642 | 6.6997  | 9.4115  | -0.8583 |
| YRI | PSG3 | 42296642 | 3.9669  | 9.0754  | -1.6722 |
| YRI | PSG3 | 42301642 | 7.1697  | 12.2685 | -1.2591 |
| YRI | PSG3 | 42306642 | 13.0182 | 18.823  | -0.9534 |
| YRI | PSG3 | 42311642 | 11.9463 | 17.1423 | -0.9336 |
| YRI | PSG3 | 42316642 | 8.0662  | 13.445  | -1.2181 |
| YRI | PSG3 | 42321642 | 7.785   | 12.2685 | -1.1072 |
| YRI | PSG3 | 42326642 | 7.9792  | 9.7476  | -0.5417 |
| YRI | PSG3 | 42331642 | 7.5879  | 10.5879 | -0.8508 |
| YRI | PSG3 | 42336642 | 6.608   | 10.4199 | -1.0973 |
| YRI | PSG3 | 42341642 | 6.3267  | 11.5963 | -1.3722 |
| YRI | PSG3 | 42346642 | 7.3662  | 13.1089 | -1.3321 |
| YRI | PSG3 | 42351642 | 6.3592  | 11.7644 | -1.3886 |
| YRI | PSG3 | 42356642 | 5.6681  | 12.9408 | -1.7077 |
| YRI | PSG3 | 42361642 | 7.6607  | 13.613  | -1.3322 |
| YRI | PSG3 | 42366642 | 9.0572  | 13.1089 | -0.9399 |
| YRI | PSG3 | 42371642 | 8.1082  | 12.9408 | -1.1348 |
| YRI | PSG3 | 42376642 | 5.6928  | 11.2602 | -1.4904 |
| YRI | PSG3 | 42381642 | 4.3123  | 10.2518 | -1.736  |
| YRI | PSG3 | 42386642 | 4.9785  | 9.9157  | -1.4886 |
| YRI | PSG3 | 42391642 | 8.7334  | 10.5879 | -0.5259 |
| YRI | PSG3 | 42396642 | 18.0254 | 15.7978 | 0.4327  |
| YRI | PSG3 | 42401642 | 14.6061 | 13.9492 | 0.1437  |
| YRI | PSG3 | 42406642 | 5.5211  | 9.0754  | -1.1635 |
| YRI | PSG3 | 42411642 | 6.4868  | 9.2434  | -0.8871 |
| YRI | PSG3 | 42416642 | 8.4532  | 9.7476  | -0.3965 |
| YRI | PSG3 | 42421642 | 12.1809 | 13.2769 | -0.2512 |
| YRI | PSG3 | 42426642 | 9.3702  | 11.7644 | -0.6151 |
| YRI | PSG3 | 42431642 | 4.6146  | 8.9073  | -1.4297 |
| YRI | PSG3 | 42436642 | 4.233   | 9.2434  | -1.6125 |
| YRI | PSG3 | 42441642 | 2.6252  | 7.2267  | -1.8568 |
| YRI | PSG3 | 42446642 | 1.6839  | 7.3947  | -2.2566 |



## 2\_TajimasD\_data

|     |      |          |        |         |         |
|-----|------|----------|--------|---------|---------|
| YRI | PSG3 | 42451642 | 2.9084 | 9.0754  | -2.0187 |
| YRI | PSG3 | 42456642 | 3.3762 | 10.924  | -2.0788 |
| YRI | PSG3 | 42461642 | 3.1612 | 12.6047 | -2.2733 |
| YRI | PSG3 | 42466642 | 5.0494 | 13.1089 | -1.8695 |
| YRI | PSG3 | 42471642 | 5.4014 | 15.1256 | -1.9691 |
| YRI | PSG3 | 42476642 | 3.8517 | 13.1089 | -2.1474 |
| YRI | PSG3 | 42481642 | 3.0888 | 8.9073  | -1.9379 |
| YRI | PSG3 | 42486642 | 3.057  | 9.2434  | -1.991  |
| YRI | PSG3 | 42491642 | 2.4433 | 8.7392  | -2.1341 |
| YRI | PSG3 | 42496642 | 1.1791 | 6.0502  | -2.308  |
| YRI | PSG3 | 42501642 | 0.9305 | 4.0335  | -2.0995 |
| YRI | PSG3 | 42506642 | 1.3109 | 5.5461  | -2.1688 |
| YRI | PSG3 | 42511642 | 2.3935 | 7.3947  | -1.9762 |
| YRI | PSG3 | 42516642 | 3.0081 | 7.8989  | -1.8195 |
| YRI | PSG3 | 42521642 | 1.8684 | 6.2183  | -2.0109 |
| YRI | PSG3 | 42526642 | 1.8938 | 5.2099  | -1.7949 |
| YRI | PSG3 | 42531642 | 2.1675 | 6.2183  | -1.8727 |
| YRI | PSG3 | 42536642 | 1.6424 | 6.2183  | -2.1154 |
| YRI | PSG3 | 42541642 | 1.7287 | 6.8906  | -2.1751 |
| YRI | PSG3 | 42546642 | 1.6266 | 5.378   | -1.9743 |
| YRI | PSG3 | 42551642 | 1.6102 | 5.378   | -1.9829 |
| YRI | PSG3 | 42556642 | 1.3711 | 7.0586  | -2.3447 |
| YRI | PSG3 | 42561642 | 2.0282 | 8.235   | -2.2224 |
| YRI | PSG3 | 42566642 | 2.151  | 7.7309  | -2.1172 |
| YRI | PSG3 | 42571642 | 2.2817 | 6.7225  | -1.9135 |
| YRI | PSG3 | 42576642 | 3.2841 | 8.4031  | -1.7991 |
| YRI | PSG3 | 42581642 | 2.8082 | 7.5628  | -1.8406 |
| YRI | PSG3 | 42586642 | 2.96   | 7.2267  | -1.7217 |
| YRI | PSG3 | 42591642 | 3.5339 | 7.2267  | -1.4901 |
| YRI | PSG3 | 42596642 | 1.9921 | 4.5377  | -1.5555 |
| YRI | PSG3 | 42601642 | 1.1942 | 3.6974  | -1.8245 |
| YRI | PSG3 | 42606642 | 1.9045 | 5.7141  | -1.8997 |
| YRI | PSG3 | 42611642 | 1.7485 | 6.2183  | -2.0664 |
| YRI | PSG3 | 42616642 | 1.5479 | 5.0419  | -1.9468 |
| YRI | PSG3 | 42621642 | 2.1835 | 5.5461  | -1.722  |
| YRI | PSG3 | 42626642 | 2.7474 | 7.5628  | -1.8642 |
| YRI | PSG3 | 42631642 | 2.7427 | 8.067   | -1.9429 |
| YRI | PSG3 | 42636642 | 2.241  | 7.3947  | -2.0365 |
| YRI | PSG3 | 42641642 | 1.4804 | 6.7225  | -2.2588 |
| YRI | PSG3 | 42646642 | 1.527  | 5.7141  | -2.0879 |
| YRI | PSG3 | 42651642 | 2.2111 | 6.3864  | -1.8844 |
| YRI | PSG3 | 42656642 | 3.4595 | 8.5712  | -1.7641 |
| YRI | PSG3 | 42661642 | 2.9133 | 8.4031  | -1.9294 |
| YRI | PSG3 | 42666642 | 2.0328 | 7.2267  | -2.0958 |
| YRI | PSG3 | 42671642 | 3.2841 | 7.7309  | -1.6872 |
| YRI | PSG3 | 42676642 | 3.7468 | 8.5712  | -1.6649 |
| YRI | PSG3 | 42681642 | 3.0179 | 8.4031  | -1.8927 |
| YRI | PSG3 | 42686642 | 3.3158 | 7.5628  | -1.6441 |
| YRI | PSG3 | 42691642 | 5.2357 | 7.5628  | -0.9009 |

## 2\_TajimasD\_data

|     |      |          |         |         |         |
|-----|------|----------|---------|---------|---------|
| YRI | PSG3 | 42696642 | 5.7164  | 8.9073  | -1.0628 |
| YRI | PSG3 | 42701642 | 3.8251  | 8.5712  | -1.6379 |
| YRI | PSG3 | 42706642 | 2.6946  | 7.8989  | -1.9361 |
| YRI | PSG3 | 42711642 | 3.4459  | 8.235   | -1.7148 |
| YRI | PSG3 | 42716642 | 3.5681  | 7.8989  | -1.6112 |
| YRI | PSG3 | 42721642 | 4.4675  | 7.7309  | -1.2382 |
| YRI | PSG3 | 42726642 | 4.1362  | 7.5628  | -1.3265 |
| YRI | PSG3 | 42731642 | 2.358   | 6.8906  | -1.9099 |
| YRI | PSG3 | 42736642 | 3.5967  | 7.7309  | -1.5686 |
| YRI | PSG3 | 42741642 | 2.9637  | 8.067   | -1.8622 |
| YRI | PSG3 | 42746642 | 1.3976  | 7.2267  | -2.3522 |
| YRI | PSG3 | 42751642 | 1.7091  | 7.0586  | -2.2053 |
| YRI | PSG3 | 42756642 | 2.1336  | 7.3947  | -2.0789 |
| YRI | PSG3 | 42761642 | 2.4995  | 9.4115  | -2.1876 |
| YRI | PSG3 | 42766642 | 3.1136  | 10.5879 | -2.1197 |
| YRI | PSG3 | 42771642 | 3.0092  | 8.4031  | -1.8957 |
| YRI | PSG3 | 42776642 | 2.5942  | 6.0502  | -1.6375 |
| YRI | PSG3 | 42781642 | 2.9388  | 6.5544  | -1.594  |
| YRI | PSG3 | 42786642 | 2.9824  | 7.5628  | -1.7732 |
| YRI | PSG3 | 42791642 | 3.1218  | 7.8989  | -1.7772 |
| YRI | PSG3 | 42796642 | 2.1746  | 7.2267  | -2.0386 |
| YRI | PSG3 | 42801642 | 1.9673  | 6.3864  | -1.9945 |
| YRI | PSG3 | 42806642 | 4.1436  | 6.5544  | -1.0629 |
| YRI | PSG3 | 42811642 | 4.0759  | 6.3864  | -1.0428 |
| YRI | PSG3 | 42816642 | 3.1559  | 6.0502  | -1.3713 |
| YRI | PSG3 | 42821642 | 3.4642  | 6.5544  | -1.3624 |
| YRI | PSG3 | 42826642 | 3.5731  | 7.3947  | -1.5101 |
| YRI | PSG3 | 42831642 | 4.928   | 8.235   | -1.1841 |
| YRI | PSG3 | 42836642 | 3.9843  | 8.235   | -1.522  |
| YRI | PSG3 | 42841642 | 3.1136  | 8.235   | -1.8337 |
| YRI | PSG3 | 42846642 | 4.7154  | 7.0586  | -0.966  |
| YRI | PSG3 | 42851642 | 5.0517  | 6.2183  | -0.5393 |
| YRI | PSG3 | 42856642 | 4.4491  | 7.0586  | -1.0758 |
| YRI | PSG3 | 42861642 | 4.438   | 8.235   | -1.3595 |
| YRI | PSG3 | 42866642 | 5.8505  | 9.2434  | -1.0919 |
| YRI | PSG3 | 42871642 | 6.576   | 10.2518 | -1.0743 |
| YRI | PSG3 | 42876642 | 5.789   | 9.7476  | -1.2127 |
| YRI | PSG3 | 42881642 | 7.1835  | 10.756  | -0.9983 |
| YRI | PSG3 | 42886642 | 11.0683 | 14.4534 | -0.7158 |
| YRI | PSG3 | 42891642 | 12.303  | 15.4617 | -0.6263 |
| YRI | PSG3 | 42896642 | 11.3073 | 13.9492 | -0.5778 |
| YRI | PSG3 | 42901642 | 8.2156  | 12.2685 | -1.0009 |
| YRI | PSG3 | 42906642 | 7.2795  | 12.1005 | -1.2061 |
| YRI | PSG3 | 42911642 | 7.1307  | 10.924  | -1.0447 |
| YRI | PSG3 | 42916642 | 7.2927  | 10.5879 | -0.9345 |
| YRI | PSG3 | 42921642 | 8.8846  | 11.2602 | -0.636  |
| YRI | PSG3 | 42926642 | 8.0749  | 12.9408 | -1.1426 |
| YRI | PSG3 | 42931642 | 8.7136  | 12.7727 | -0.965  |
| YRI | PSG3 | 42936642 | 11.4536 | 11.7644 | -0.0798 |

## 2\_TajimasD\_data

|     |      |          |         |         |         |
|-----|------|----------|---------|---------|---------|
| YRI | PSG3 | 42941642 | 12.1149 | 10.924  | 0.328   |
| YRI | PSG3 | 42946642 | 11.0699 | 10.2518 | 0.2391  |
| YRI | PSG3 | 42951642 | 9.6454  | 9.0754  | 0.1866  |
| YRI | PSG3 | 42956642 | 8.2945  | 8.5712  | -0.0955 |
| YRI | PSG3 | 42961642 | 11.602  | 9.4115  | 0.6933  |
| YRI | PSG3 | 42966642 | 15.4942 | 9.4115  | 1.9251  |
| YRI | PSG3 | 42971642 | 12.5524 | 10.2518 | 0.6724  |
| YRI | PSG3 | 42976642 | 8.6834  | 9.7476  | -0.326  |
| YRI | PSG3 | 42981642 | 9.1894  | 9.5795  | -0.1215 |
| YRI | PSG3 | 42986642 | 7.3977  | 8.235   | -0.2998 |
| YRI | PSG3 | 42991642 | 5.8282  | 6.7225  | -0.3854 |
| YRI | PSG3 | 42996642 | 6.7388  | 8.067   | -0.4847 |
| YRI | PSG3 | 43001642 | 6.7973  | 8.7392  | -0.6583 |
| YRI | PSG3 | 43006642 | 7.5875  | 7.5628  | 0.0096  |
| YRI | PSG3 | 43011642 | 7.3719  | 6.7225  | 0.2798  |
| YRI | PSG3 | 43016642 | 7.3214  | 6.7225  | 0.2581  |
| YRI | PSG3 | 43021642 | 5.9735  | 6.7225  | -0.3227 |
| YRI | PSG3 | 43026642 | 8.316   | 9.0754  | -0.2486 |
| YRI | PSG3 | 43031642 | 11.3477 | 11.4282 | -0.0213 |
| YRI | PSG3 | 43036642 | 7.6469  | 9.2434  | -0.5138 |
| YRI | PSG3 | 43041642 | 6.9559  | 7.7309  | -0.2941 |
| YRI | PSG3 | 43046642 | 10.1916 | 10.0837 | 0.032   |
| YRI | PSG3 | 43051642 | 12.4037 | 11.4282 | 0.2575  |
| YRI | PSG3 | 43056642 | 12.4463 | 10.756  | 0.4723  |
| YRI | PSG3 | 43061642 | 12.5299 | 10.0837 | 0.7261  |
| YRI | PSG3 | 43066642 | 10.1205 | 7.8989  | 0.8265  |
| YRI | PSG3 | 43071642 | 7.7761  | 7.0586  | 0.2958  |
| YRI | PSG3 | 43076642 | 8.6806  | 8.7392  | -0.0199 |
| YRI | PSG3 | 43081642 | 9.5258  | 9.9157  | -0.1176 |
| YRI | PSG3 | 43086642 | 9.8506  | 10.0837 | -0.0692 |
| YRI | PSG3 | 43091642 | 9.3465  | 10.0837 | -0.2188 |
| YRI | PSG3 | 43096642 | 7.5334  | 8.7392  | -0.4087 |
| YRI | PSG3 | 43101642 | 7.0881  | 8.235   | -0.4107 |
| YRI | PSG3 | 43106642 | 6.7306  | 7.5628  | -0.3222 |
| YRI | PSG3 | 43111642 | 9.1533  | 11.4282 | -0.6006 |
| YRI | PSG3 | 43116642 | 13.6452 | 13.9492 | -0.0665 |
| YRI | PSG3 | 43121642 | 12.6467 | 11.2602 | 0.3712  |
| YRI | PSG3 | 43126642 | 11.6848 | 10.756  | 0.2596  |
| YRI | PSG3 | 43131642 | 12.3085 | 10.0837 | 0.6604  |
| YRI | PSG3 | 43136642 | 11.698  | 10.2518 | 0.4227  |
| YRI | PSG3 | 43141642 | 15.3722 | 12.7727 | 0.618   |
| YRI | PSG3 | 43146642 | 17.7782 | 12.9408 | 1.1359  |
| YRI | PSG3 | 43151642 | 14.4635 | 12.1005 | 0.5912  |
| YRI | PSG3 | 43156642 | 11.0357 | 11.4282 | -0.1036 |
| YRI | PSG3 | 43161642 | 6.911   | 8.5712  | -0.5729 |
| YRI | PSG3 | 43166642 | 6.2411  | 9.0754  | -0.9278 |
| YRI | PSG3 | 43171642 | 7.2901  | 10.4199 | -0.901  |
| YRI | PSG3 | 43176642 | 7.6619  | 10.924  | -0.8984 |
| YRI | PSG3 | 43181642 | 7.5708  | 12.6047 | -1.2118 |

## 2\_TajimasD\_data

|     |       |          |         |         |         |
|-----|-------|----------|---------|---------|---------|
| YRI | PSG3  | 43186642 | 8.8709  | 13.7811 | -1.0863 |
| YRI | PSG3  | 43191642 | 9.4851  | 11.0921 | -0.4363 |
| YRI | PSG3  | 43196642 | 8.4657  | 9.4115  | -0.2993 |
| YRI | PSG3  | 43201642 | 10.7179 | 12.4366 | -0.419  |
| YRI | PSG3  | 43206642 | 9.093   | 14.2853 | -1.1102 |
| YRI | PSG3  | 43211642 | 7.3981  | 15.6298 | -1.6155 |
| YRI | PSG3  | 43216642 | 11.4743 | 19.1591 | -1.2409 |
| YRI | PSG3  | 43221642 | 11.335  | 19.8313 | -1.3271 |
| YRI | PSG3  | 43226642 | 8.0641  | 18.6549 | -1.7545 |
| YRI | PSG3  | 43231642 | 8.7146  | 21.512  | -1.8481 |
| CEU | RGPD1 | 86418577 | 16.9373 | 10.2337 | 1.9749  |
| CEU | RGPD1 | 86423577 | 18.952  | 11.4277 | 1.9991  |
| CEU | RGPD1 | 86428577 | 14.0424 | 8.5281  | 1.924   |
| CEU | RGPD1 | 86433577 | 9.8915  | 6.9931  | 1.2127  |
| CEU | RGPD1 | 86438577 | 7.6883  | 6.6519  | 0.4538  |
| CEU | RGPD1 | 86443577 | 6.2929  | 7.3342  | -0.4172 |
| CEU | RGPD1 | 86448577 | 5.5951  | 8.0164  | -0.8943 |
| CEU | RGPD1 | 86453577 | 9.5652  | 10.2337 | -0.1969 |
| CEU | RGPD1 | 86458577 | 9.1509  | 9.7221  | -0.1765 |
| CEU | RGPD1 | 86463577 | 7.0237  | 6.8225  | 0.0861  |
| CEU | RGPD1 | 86468577 | 6.5294  | 6.1402  | 0.1831  |
| CEU | RGPD1 | 86473577 | 10.792  | 9.0398  | 0.5793  |
| CEU | RGPD1 | 86478577 | 15.8495 | 10.4043 | 1.5796  |
| CEU | RGPD1 | 86483577 | 16.7862 | 8.6987  | 2.7707  |
| CEU | RGPD1 | 86488577 | 15.0952 | 8.0164  | 2.6146  |
| CEU | RGPD1 | 86493577 | 10.3286 | 8.6987  | 0.5584  |
| CEU | RGPD1 | 86498577 | 9.3752  | 9.8926  | -0.1573 |
| CEU | RGPD1 | 86503577 | 9.2307  | 9.8926  | -0.2013 |
| CEU | RGPD1 | 86508577 | 12.4321 | 10.916  | 0.4205  |
| CEU | RGPD1 | 86513577 | 13.8874 | 9.8926  | 1.2147  |
| CEU | RGPD1 | 86518577 | 7.8738  | 7.5047  | 0.1448  |
| CEU | RGPD1 | 86523577 | 6.4341  | 8.3576  | -0.6837 |
| CEU | RGPD1 | 86528577 | 7.9948  | 7.8459  | 0.0561  |
| CEU | RGPD1 | 86533577 | 8.1241  | 7.6753  | 0.1725  |
| CEU | RGPD1 | 86538577 | 6.9514  | 7.5047  | -0.2171 |
| CEU | RGPD1 | 86543577 | 7.3719  | 8.0164  | -0.238  |
| CEU | RGPD1 | 86548577 | 8.8029  | 9.7221  | -0.2841 |
| CEU | RGPD1 | 86553577 | 9.1265  | 8.187   | 0.3404  |
| CEU | RGPD1 | 86558577 | 7.8158  | 7.6753  | 0.054   |
| CEU | RGPD1 | 86563577 | 5.9786  | 8.0164  | -0.7527 |
| CEU | RGPD1 | 86568577 | 5.3946  | 7.8459  | -0.9234 |
| CEU | RGPD1 | 86573577 | 4.3092  | 7.8459  | -1.3323 |
| CEU | RGPD1 | 86578577 | 3.4636  | 8.8692  | -1.819  |
| CEU | RGPD1 | 86583577 | 6.2482  | 10.0632 | -1.1417 |
| CEU | RGPD1 | 86588577 | 6.8306  | 8.3576  | -0.5428 |
| CEU | RGPD1 | 86593577 | 8.8949  | 8.187   | 0.2565  |
| CEU | RGPD1 | 86598577 | 12.5471 | 9.7221  | 0.873   |
| CEU | RGPD1 | 86603577 | 15.2167 | 11.4277 | 1.0067  |
| CEU | RGPD1 | 86608577 | 16.5865 | 12.9627 | 0.8549  |

## 2\_TajimasD\_data

|     |       |          |         |         |         |
|-----|-------|----------|---------|---------|---------|
| CEU | RGPD1 | 86613577 | 10.1255 | 11.2571 | -0.3049 |
| CEU | RGPD1 | 86618577 | 5.3152  | 9.8926  | -1.3918 |
| CEU | RGPD1 | 86623577 | 4.986   | 11.7688 | -1.7529 |
| CEU | RGPD1 | 86628577 | 7.7997  | 13.3039 | -1.267  |
| CEU | RGPD1 | 86633577 | 7.273   | 10.0632 | -0.835  |
| CEU | RGPD1 | 86638577 | 7.1159  | 7.6753  | -0.215  |
| CEU | RGPD1 | 86643577 | 11.8586 | 9.2104  | 0.8605  |
| CEU | RGPD1 | 86648577 | 10.4228 | 8.3576  | 0.7341  |
| CEU | RGPD1 | 86653577 | 10.6914 | 8.5281  | 0.7548  |
| CEU | RGPD1 | 86658577 | 9.9744  | 8.3576  | 0.5747  |
| CEU | RGPD1 | 86663577 | 6.669   | 7.5047  | -0.3279 |
| CEU | RGPD1 | 86668577 | 6.8253  | 8.0164  | -0.4399 |
| CEU | RGPD1 | 86673577 | 5.1163  | 6.4814  | -0.6119 |
| CEU | RGPD1 | 86678577 | 5.6383  | 7.1636  | -0.6244 |
| CEU | RGPD1 | 86683577 | 5.9282  | 7.5047  | -0.6185 |
| CEU | RGPD1 | 86688577 | 6.643   | 7.3342  | -0.2769 |
| CEU | RGPD1 | 86693577 | 7.7965  | 8.187   | -0.1415 |
| CEU | RGPD1 | 86698577 | 7.287   | 8.0164  | -0.2694 |
| CEU | RGPD1 | 86703577 | 6.5325  | 6.9931  | -0.1927 |
| CEU | RGPD1 | 86708577 | 5.1319  | 4.7757  | 0.2095  |
| CEU | RGPD1 | 86713577 | 5.6549  | 7.5047  | -0.7258 |
| CEU | RGPD1 | 86718577 | 6.938   | 9.2104  | -0.7384 |
| CEU | RGPD1 | 86723577 | 8.6181  | 8.187   | 0.1562  |
| CEU | RGPD1 | 86728577 | 9.8915  | 8.8692  | 0.344   |
| CEU | RGPD1 | 86733577 | 7.3321  | 7.1636  | 0.069   |
| CEU | RGPD1 | 86738577 | 4.9516  | 4.9463  | 0.003   |
| CEU | RGPD1 | 86743577 | 6.0544  | 5.6286  | 0.2166  |
| CEU | RGPD1 | 86748577 | 5.7972  | 5.7991  | -0.0009 |
| CEU | RGPD1 | 86753577 | 8.0076  | 6.3108  | 0.779   |
| CEU | RGPD1 | 86758577 | 9.5947  | 9.2104  | 0.1249  |
| CEU | RGPD1 | 86763577 | 9.4436  | 9.3809  | 0.02    |
| CEU | RGPD1 | 86768577 | 8.6786  | 8.187   | 0.1781  |
| CEU | RGPD1 | 86773577 | 9.0838  | 9.3809  | -0.0949 |
| CEU | RGPD1 | 86778577 | 12.352  | 10.5749 | 0.5077  |
| CEU | RGPD1 | 86783577 | 8.6529  | 9.2104  | -0.1812 |
| CEU | RGPD1 | 86788577 | 5.3043  | 8.5281  | -1.1248 |
| CEU | RGPD1 | 86793577 | 7.4218  | 8.0164  | -0.2196 |
| CEU | RGPD1 | 86798577 | 7.6774  | 6.4814  | 0.5361  |
| CEU | RGPD1 | 86803577 | 11.1976 | 7.5047  | 1.4489  |
| CEU | RGPD1 | 86808577 | 10.2052 | 7.1636  | 1.2451  |
| CEU | RGPD1 | 86813577 | 4.7493  | 5.1169  | -0.2035 |
| CEU | RGPD1 | 86818577 | 9.1514  | 6.8225  | 0.9965  |
| CEU | RGPD1 | 86823577 | 11.9259 | 9.2104  | 0.8824  |
| CEU | RGPD1 | 86828577 | 7.5663  | 9.5515  | -0.6237 |
| CEU | RGPD1 | 86833577 | 4.4512  | 8.0164  | -1.3168 |
| CEU | RGPD1 | 86838577 | 8.013   | 8.187   | -0.063  |
| CEU | RGPD1 | 86843577 | 8.9196  | 6.9931  | 0.8061  |
| CEU | RGPD1 | 86848577 | 8.0674  | 6.3108  | 0.8065  |
| CEU | RGPD1 | 86853577 | 10.6007 | 8.187   | 0.8744  |

## 2\_TajimasD\_data

|     |       |          |         |         |         |
|-----|-------|----------|---------|---------|---------|
| CEU | RGPD1 | 86858577 | 8.1983  | 8.187   | 0.0041  |
| CEU | RGPD1 | 86863577 | 3.8673  | 7.1636  | -1.3493 |
| CEU | RGPD1 | 86868577 | 3.4266  | 6.3108  | -1.3242 |
| CEU | RGPD1 | 86873577 | 4.2482  | 5.6286  | -0.7022 |
| CEU | RGPD1 | 86878577 | 4.2892  | 4.4346  | -0.0912 |
| CEU | RGPD1 | 86883577 | 2.2579  | 2.2173  | 0.0454  |
| CEU | RGPD1 | 86888577 | 2.6545  | 2.8996  | -0.2204 |
| CEU | RGPD1 | 86893577 | 4.8675  | 5.9697  | -0.5319 |
| CEU | RGPD1 | 86898577 | 3.3082  | 5.2874  | -1.0642 |
| CEU | RGPD1 | 86903577 | 2.4226  | 3.7524  | -0.9634 |
| CEU | RGPD1 | 86908577 | 2.1589  | 4.7757  | -1.539  |
| CEU | RGPD1 | 86913577 | 0.7535  | 3.9229  | -2.2106 |
| CEU | RGPD1 | 86918577 | 2.7135  | 4.9463  | -1.2734 |
| CEU | RGPD1 | 86923577 | 2.9798  | 5.458   | -1.2955 |
| CEU | RGPD1 | 86928577 | 1.8248  | 5.1169  | -1.8222 |
| CEU | RGPD1 | 86933577 | 2.207   | 5.458   | -1.6995 |
| CEU | RGPD1 | 86938577 | 1.8538  | 3.2407  | -1.1372 |
| CEU | RGPD1 | 86943577 | 3.1791  | 4.6052  | -0.8658 |
| CEU | RGPD1 | 86948577 | 4.3329  | 4.2641  | 0.0447  |
| CEU | RGPD1 | 86953577 | 4.6059  | 3.2407  | 1.1194  |
| CEU | RGPD1 | 86958577 | 4.5644  | 3.5818  | 0.7406  |
| CEU | RGPD1 | 86963577 | 4.0367  | 2.3879  | 1.7364  |
| CEU | RGPD1 | 86968577 | 4.9161  | 3.9229  | 0.6927  |
| CEU | RGPD1 | 86973577 | 7.2639  | 6.4814  | 0.3507  |
| CEU | RGPD1 | 86978577 | 7.6906  | 6.1402  | 0.7296  |
| CEU | RGPD1 | 86983577 | 6.5318  | 5.458   | 0.5614  |
| CEU | RGPD1 | 86988577 | 5.7796  | 6.6519  | -0.3819 |
| CEU | RGPD1 | 86993577 | 6.6188  | 8.0164  | -0.5162 |
| CEU | RGPD1 | 86998577 | 8.179   | 7.1636  | 0.4157  |
| CEU | RGPD1 | 87003577 | 6.3901  | 5.9697  | 0.2029  |
| CEU | RGPD1 | 87008577 | 5.1727  | 5.7991  | -0.3103 |
| CEU | RGPD1 | 87013577 | 8.7777  | 8.8692  | -0.0308 |
| CEU | RGPD1 | 87018577 | 12.0887 | 10.5749 | 0.4325  |
| CEU | RGPD1 | 87023577 | 10.8903 | 7.8459  | 1.1469  |
| CEU | RGPD1 | 87028577 | 6.6421  | 5.7991  | 0.4175  |
| CEU | RGPD1 | 87033577 | 3.2814  | 4.9463  | -0.9495 |
| CEU | RGPD1 | 87038577 | 3.879   | 5.6286  | -0.89   |
| CEU | RGPD1 | 87043577 | 4.2181  | 5.6286  | -0.7175 |
| CEU | RGPD1 | 87048577 | 6.8773  | 6.1402  | 0.3469  |
| CEU | RGPD1 | 87053577 | 16.5424 | 9.3809  | 2.2878  |
| CEU | RGPD1 | 87058577 | 25.8628 | 12.4511 | 3.2867  |
| CEU | RGPD1 | 87063577 | 17.3475 | 9.3809  | 2.545   |
| CEU | RGPD1 | 87068577 | 6.6273  | 6.8225  | -0.0835 |
| CEU | RGPD1 | 87073577 | 9.9882  | 8.187   | 0.6525  |
| CEU | RGPD1 | 87078577 | 7.9516  | 6.8225  | 0.4831  |
| CEU | RGPD1 | 87083577 | 6.4747  | 5.458   | 0.5315  |
| CEU | RGPD1 | 87088577 | 8.3647  | 4.7757  | 2.1108  |
| CEU | RGPD1 | 87093577 | 12.8353 | 7.5047  | 2.0915  |
| CEU | RGPD1 | 87098577 | 12.7248 | 8.5281  | 1.4643  |

## 2\_TajimasD\_data

|     |       |          |        |        |         |
|-----|-------|----------|--------|--------|---------|
| CEU | RGPD1 | 87103577 | 9.6893 | 6.9931 | 1.1281  |
| CEU | RGPD1 | 87108577 | 9.6203 | 7.8459 | 0.6684  |
| CEU | RGPD1 | 87113577 | 9.4714 | 8.8692 | 0.2026  |
| CEU | RGPD1 | 87118577 | 8.947  | 8.0164 | 0.3437  |
| CEU | RGPD1 | 87123577 | 5.6052 | 5.2874 | 0.1709  |
| CEU | RGPD1 | 87128577 | 4.5551 | 4.0935 | 0.3104  |
| CEU | RGPD1 | 87133577 | 3.8505 | 3.2407 | 0.5     |
| CEU | RGPD1 | 87138577 | 5.7133 | 3.9229 | 1.2488  |
| CEU | RGPD1 | 87143577 | 4.4574 | 3.0701 | 1.19    |
| CEU | RGPD1 | 87148577 | 2.8042 | 2.2173 | 0.6557  |
| CEU | RGPD1 | 87153577 | 4.142  | 4.6052 | -0.2812 |
| CEU | RGPD1 | 87158577 | 3.5832 | 4.2641 | -0.442  |
| CEU | RGPD1 | 87163577 | 3.0571 | 2.8996 | 0.1416  |
| CEU | RGPD1 | 87168577 | 5.2461 | 6.8225 | -0.6745 |
| CEU | RGPD1 | 87173577 | 4.0132 | 5.7991 | -0.8845 |
| CEU | RGPD1 | 87178577 | 0.584  | 1.0234 | -0.8731 |
| CEU | RGPD1 | 87183577 | 0.5147 | 0.6822 | -0.4374 |
| CEU | RGPD1 | 87188577 | 0.1257 | 0.5117 | -1.2106 |
| CEU | RGPD1 | 87193577 | 0.1156 | 0.3411 | -0.904  |
| CEU | RGPD1 | 87198577 | 0.4822 | 0.1706 | 1.851   |
| CEU | RGPD1 | 87203577 | 0.4822 | 0.1706 | 1.851   |
| CEU | RGPD1 | 87208577 | 0.5033 | 0.1706 | 1.9763  |
| CEU | RGPD1 | 87213577 | 0.6505 | 0.6822 | -0.0828 |
| CEU | RGPD1 | 87218577 | 0.1573 | 0.6822 | -1.3707 |
| CEU | RGPD1 | 87223577 | 0.0505 | 0.5117 | -1.4464 |
| CEU | RGPD1 | 87228577 | 0.0404 | 0.3411 | -1.2054 |
| CEU | RGPD1 | 87233577 | 1.7974 | 2.0467 | -0.2966 |
| CEU | RGPD1 | 87238577 | 2.5508 | 3.7524 | -0.8705 |
| CEU | RGPD1 | 87243577 | 1.5483 | 2.3879 | -0.8842 |
| CEU | RGPD1 | 87248577 | 2.7646 | 3.2407 | -0.3904 |
| CEU | RGPD1 | 87253577 | 1.9697 | 2.5584 | -0.5864 |
| CEU | RGPD1 | 87258577 | 3.9709 | 5.2874 | -0.7079 |
| CEU | RGPD1 | 87263577 | 3.9709 | 5.2874 | -0.7079 |
| CEU | RGPD1 | 87268577 | 1.1511 | 1.3645 | -0.3452 |
| CEU | RGPD1 | 87273577 | 4.3465 | 5.2874 | -0.5059 |
| CEU | RGPD1 | 87278577 | 4.932  | 5.9697 | -0.5008 |
| CEU | RGPD1 | 87283577 | 1.7666 | 2.2173 | -0.5035 |
| CEU | RGPD1 | 87288577 | 0.3758 | 1.1939 | -1.4579 |
| CEU | RGPD1 | 87293577 | 1.0449 | 3.4112 | -1.8585 |
| CEU | RGPD1 | 87298577 | 3.6273 | 4.0935 | -0.3135 |
| CEU | RGPD1 | 87303577 | 5.0831 | 4.4346 | 0.4069  |
| CEU | RGPD1 | 87308577 | 5.1136 | 5.6286 | -0.262  |
| CEU | RGPD1 | 87313577 | 3.9882 | 5.9697 | -0.9563 |
| CEU | RGPD1 | 87318577 | 3.7114 | 5.7991 | -1.034  |
| CEU | RGPD1 | 87323577 | 3.8062 | 4.4346 | -0.3943 |
| CEU | RGPD1 | 87328577 | 1.3579 | 2.729  | -1.296  |
| CEU | RGPD1 | 87333577 | 2.4964 | 4.0935 | -1.0739 |
| CEU | RGPD1 | 87338577 | 2.8992 | 4.2641 | -0.886  |
| CEU | RGPD1 | 87343577 | 2.235  | 2.3879 | -0.161  |

## 2\_TajimasD\_data

|     |       |          |         |         |         |
|-----|-------|----------|---------|---------|---------|
| CEU | RGPD1 | 87348577 | 2.5337  | 2.3879  | 0.1535  |
| CEU | RGPD1 | 87353577 | 1.497   | 2.0467  | -0.6541 |
| CEU | RGPD1 | 87358577 | 2.5364  | 3.0701  | -0.4578 |
| CEU | RGPD1 | 87363577 | 4.4987  | 5.6286  | -0.5747 |
| CEU | RGPD1 | 87368577 | 5.5203  | 7.3342  | -0.7268 |
| CEU | RGPD1 | 87373577 | 6.7471  | 8.5281  | -0.6214 |
| CEU | RGPD1 | 87378577 | 3.7512  | 4.6052  | -0.5185 |
| CEU | RGPD1 | 87383577 | 0.0783  | 0.1706  | -0.5483 |
| CEU | RGPD1 | 87388577 | 1.6964  | 1.7056  | -0.0126 |
| CEU | RGPD1 | 87393577 | 4.9606  | 5.458   | -0.26   |
| CEU | RGPD1 | 87398577 | 6.7524  | 6.8225  | -0.03   |
| CEU | RGPD1 | 87403577 | 9.7159  | 7.6753  | 0.7844  |
| CEU | RGPD1 | 87408577 | 13.0876 | 8.8692  | 1.4195  |
| CEU | RGPD1 | 87413577 | 12.5799 | 8.6987  | 1.3297  |
| CEU | RGPD1 | 87418577 | 11.0734 | 8.0164  | 1.1291  |
| CEU | RGPD1 | 87423577 | 9.4057  | 7.6753  | 0.6651  |
| CEU | RGPD1 | 87428577 | 13.2707 | 10.0632 | 0.9599  |
| CEU | RGPD1 | 87433577 | 13.431  | 8.187   | 1.8998  |
| CEU | RGPD1 | 87438577 | 8.6197  | 4.9463  | 2.0949  |
| CEU | RGPD1 | 87443577 | 12.2437 | 7.3342  | 1.9671  |
| CEU | RGPD1 | 87448577 | 14.3457 | 9.2104  | 1.6687  |
| CEU | RGPD1 | 87453577 | 11.2068 | 7.6753  | 1.3574  |
| CEU | RGPD1 | 87458577 | 7.6477  | 5.458   | 1.1447  |
| CEU | RGPD1 | 87463577 | 4.8054  | 5.458   | -0.3412 |
| CEU | RGPD1 | 87468577 | 7.174   | 8.0164  | -0.3111 |
| CEU | RGPD1 | 87473577 | 11.0872 | 10.2337 | 0.2514  |
| CEU | RGPD1 | 87478577 | 12.1934 | 10.7454 | 0.4076  |
| CEU | RGPD1 | 87483577 | 13.2463 | 10.0632 | 0.9526  |
| CEU | RGPD1 | 87488577 | 13.7619 | 9.2104  | 1.479   |
| CEU | RGPD1 | 87493577 | 8.5013  | 5.7991  | 1.3384  |
| CEU | RGPD1 | 87498577 | 4.7757  | 4.4346  | 0.214   |
| CEU | RGPD1 | 87503577 | 12.4389 | 7.8459  | 1.7302  |
| CEU | RGPD1 | 87508577 | 14.7422 | 9.2104  | 1.7975  |
| CHB | RGPD1 | 86418577 | 10.0579 | 11.5202 | -0.3845 |
| CHB | RGPD1 | 86423577 | 10.5542 | 11.012  | -0.1256 |
| CHB | RGPD1 | 86428577 | 7.4435  | 8.6402  | -0.4113 |
| CHB | RGPD1 | 86433577 | 5.4159  | 7.9625  | -0.9437 |
| CHB | RGPD1 | 86438577 | 6.4719  | 8.1319  | -0.6034 |
| CHB | RGPD1 | 86443577 | 6.0135  | 8.6402  | -0.9029 |
| CHB | RGPD1 | 86448577 | 6.3314  | 9.6567  | -1.0311 |
| CHB | RGPD1 | 86453577 | 11.3798 | 12.8755 | -0.3541 |
| CHB | RGPD1 | 86458577 | 9.6558  | 12.1979 | -0.6333 |
| CHB | RGPD1 | 86463577 | 5.8886  | 9.6567  | -1.1684 |
| CHB | RGPD1 | 86468577 | 5.408   | 8.6402  | -1.111  |
| CHB | RGPD1 | 86473577 | 8.2313  | 10.5037 | -0.6515 |
| CHB | RGPD1 | 86478577 | 12.7164 | 11.5202 | 0.3145  |
| CHB | RGPD1 | 86483577 | 14.8136 | 11.1814 | 0.9821  |
| CHB | RGPD1 | 86488577 | 13.2993 | 11.1814 | 0.5727  |
| CHB | RGPD1 | 86493577 | 9.3139  | 11.3508 | -0.543  |



## 2\_TajimasD\_data

|     |       |          |         |         |         |
|-----|-------|----------|---------|---------|---------|
| CHB | RGPD1 | 86498577 | 8.2543  | 12.3673 | -1.0115 |
| CHB | RGPD1 | 86503577 | 7.6404  | 10.3343 | -0.7842 |
| CHB | RGPD1 | 86508577 | 10.886  | 12.7061 | -0.4363 |
| CHB | RGPD1 | 86513577 | 11.8376 | 13.3838 | -0.3529 |
| CHB | RGPD1 | 86518577 | 6.6709  | 9.9955  | -0.9983 |
| CHB | RGPD1 | 86523577 | 5.6674  | 10.3343 | -1.3585 |
| CHB | RGPD1 | 86528577 | 6.423   | 9.4872  | -0.9659 |
| CHB | RGPD1 | 86533577 | 6.4418  | 9.8261  | -1.0326 |
| CHB | RGPD1 | 86538577 | 5.4573  | 10.6731 | -1.4731 |
| CHB | RGPD1 | 86543577 | 5.7358  | 11.5202 | -1.5208 |
| CHB | RGPD1 | 86548577 | 6.7371  | 11.5202 | -1.2576 |
| CHB | RGPD1 | 86553577 | 7.0205  | 9.3178  | -0.7364 |
| CHB | RGPD1 | 86558577 | 5.9182  | 9.3178  | -1.0897 |
| CHB | RGPD1 | 86563577 | 3.8262  | 9.9955  | -1.8525 |
| CHB | RGPD1 | 86568577 | 3.1828  | 9.3178  | -1.9665 |
| CHB | RGPD1 | 86573577 | 2.2338  | 8.8096  | -2.2202 |
| CHB | RGPD1 | 86578577 | 2.1774  | 8.8096  | -2.2392 |
| CHB | RGPD1 | 86583577 | 3.4363  | 9.3178  | -1.8852 |
| CHB | RGPD1 | 86588577 | 3.4578  | 8.6402  | -1.7814 |
| CHB | RGPD1 | 86593577 | 4.3508  | 8.4708  | -1.4423 |
| CHB | RGPD1 | 86598577 | 4.98    | 10.8426 | -1.6316 |
| CHB | RGPD1 | 86603577 | 4.9619  | 12.0285 | -1.784  |
| CHB | RGPD1 | 86608577 | 6.4517  | 12.8755 | -1.5208 |
| CHB | RGPD1 | 86613577 | 5.4238  | 11.6896 | -1.6249 |
| CHB | RGPD1 | 86618577 | 4.5351  | 9.9955  | -1.6397 |
| CHB | RGPD1 | 86623577 | 6.1458  | 11.6896 | -1.4377 |
| CHB | RGPD1 | 86628577 | 7.0258  | 12.1979 | -1.2886 |
| CHB | RGPD1 | 86633577 | 4.7404  | 9.1484  | -1.4372 |
| CHB | RGPD1 | 86638577 | 3.8317  | 8.8096  | -1.6807 |
| CHB | RGPD1 | 86643577 | 4.6927  | 9.6567  | -1.5392 |
| CHB | RGPD1 | 86648577 | 3.3668  | 7.7931  | -1.6729 |
| CHB | RGPD1 | 86653577 | 3.5071  | 7.9625  | -1.651  |
| CHB | RGPD1 | 86658577 | 2.9579  | 6.946   | -1.674  |
| CHB | RGPD1 | 86663577 | 1.8603  | 6.0989  | -2.0008 |
| CHB | RGPD1 | 86668577 | 2.059   | 7.9625  | -2.1877 |
| CHB | RGPD1 | 86673577 | 1.427   | 8.3013  | -2.4517 |
| CHB | RGPD1 | 86678577 | 1.724   | 6.7766  | -2.1689 |
| CHB | RGPD1 | 86683577 | 1.4333  | 4.5742  | -1.9126 |
| CHB | RGPD1 | 86688577 | 1.6629  | 4.7436  | -1.8172 |
| CHB | RGPD1 | 86693577 | 2.3124  | 5.4213  | -1.6302 |
| CHB | RGPD1 | 86698577 | 2.2408  | 6.4378  | -1.8871 |
| CHB | RGPD1 | 86703577 | 2.1612  | 7.1154  | -2.0345 |
| CHB | RGPD1 | 86708577 | 1.7554  | 5.7601  | -1.9896 |
| CHB | RGPD1 | 86713577 | 2.2703  | 6.4378  | -1.8738 |
| CHB | RGPD1 | 86718577 | 2.5085  | 6.946   | -1.8627 |
| CHB | RGPD1 | 86723577 | 3.3406  | 7.2848  | -1.5854 |
| CHB | RGPD1 | 86728577 | 4.4986  | 8.3013  | -1.3562 |
| CHB | RGPD1 | 86733577 | 3.2637  | 7.2848  | -1.6163 |
| CHB | RGPD1 | 86738577 | 2.2427  | 6.946   | -1.9743 |

## 2\_TajimasD\_data

|     |       |          |        |         |         |
|-----|-------|----------|--------|---------|---------|
| CHB | RGPD1 | 86743577 | 3.1352 | 6.946   | -1.5996 |
| CHB | RGPD1 | 86748577 | 2.6292 | 5.9295  | -1.5977 |
| CHB | RGPD1 | 86753577 | 4.0274 | 8.1319  | -1.4919 |
| CHB | RGPD1 | 86758577 | 6.4904 | 9.1484  | -0.8666 |
| CHB | RGPD1 | 86763577 | 6.1696 | 7.7931  | -0.6136 |
| CHB | RGPD1 | 86768577 | 4.8125 | 7.2848  | -0.9938 |
| CHB | RGPD1 | 86773577 | 5.1767 | 10.5037 | -1.5272 |
| CHB | RGPD1 | 86778577 | 7.0425 | 12.1979 | -1.2844 |
| CHB | RGPD1 | 86783577 | 5.3276 | 8.8096  | -1.1756 |
| CHB | RGPD1 | 86788577 | 3.2913 | 6.946   | -1.5341 |
| CHB | RGPD1 | 86793577 | 4.0632 | 5.7601  | -0.8431 |
| CHB | RGPD1 | 86798577 | 4.3232 | 5.0825  | -0.4215 |
| CHB | RGPD1 | 86803577 | 6.8576 | 6.2684  | 0.2714  |
| CHB | RGPD1 | 86808577 | 5.9979 | 5.7601  | 0.1181  |
| CHB | RGPD1 | 86813577 | 2.4525 | 4.913   | -1.4074 |
| CHB | RGPD1 | 86818577 | 5.1359 | 8.3013  | -1.1289 |
| CHB | RGPD1 | 86823577 | 6.608  | 10.1649 | -1.0515 |
| CHB | RGPD1 | 86828577 | 3.766  | 8.8096  | -1.7029 |
| CHB | RGPD1 | 86833577 | 3.1696 | 7.6237  | -1.7176 |
| CHB | RGPD1 | 86838577 | 5.4171 | 9.4872  | -1.283  |
| CHB | RGPD1 | 86843577 | 4.8498 | 8.4708  | -1.2676 |
| CHB | RGPD1 | 86848577 | 4.5939 | 6.2684  | -0.7712 |
| CHB | RGPD1 | 86853577 | 6.2749 | 7.9625  | -0.6254 |
| CHB | RGPD1 | 86858577 | 6.0046 | 9.4872  | -1.0978 |
| CHB | RGPD1 | 86863577 | 4.0684 | 7.7931  | -1.4077 |
| CHB | RGPD1 | 86868577 | 3.5259 | 5.7601  | -1.11   |
| CHB | RGPD1 | 86873577 | 4.348  | 6.946   | -1.0905 |
| CHB | RGPD1 | 86878577 | 3.6571 | 5.9295  | -1.1001 |
| CHB | RGPD1 | 86883577 | 1.8439 | 3.2189  | -1.1304 |
| CHB | RGPD1 | 86888577 | 2.8119 | 5.4213  | -1.3683 |
| CHB | RGPD1 | 86893577 | 4.0303 | 7.7931  | -1.4221 |
| CHB | RGPD1 | 86898577 | 2.443  | 6.4378  | -1.7962 |
| CHB | RGPD1 | 86903577 | 1.7021 | 4.913   | -1.8366 |
| CHB | RGPD1 | 86908577 | 1.5844 | 4.7436  | -1.8635 |
| CHB | RGPD1 | 86913577 | 1.0487 | 3.7271  | -1.9458 |
| CHB | RGPD1 | 86918577 | 2.6709 | 4.913   | -1.2825 |
| CHB | RGPD1 | 86923577 | 2.9688 | 6.946   | -1.6695 |
| CHB | RGPD1 | 86928577 | 2.9859 | 6.2684  | -1.5118 |
| CHB | RGPD1 | 86933577 | 3.1687 | 5.9295  | -1.3365 |
| CHB | RGPD1 | 86938577 | 1.8459 | 4.7436  | -1.7093 |
| CHB | RGPD1 | 86943577 | 3.2352 | 5.2519  | -1.0877 |
| CHB | RGPD1 | 86948577 | 3.8165 | 4.913   | -0.6272 |
| CHB | RGPD1 | 86953577 | 2.9979 | 3.0495  | -0.0444 |
| CHB | RGPD1 | 86958577 | 2.8989 | 3.0495  | -0.1295 |
| CHB | RGPD1 | 86963577 | 2.8652 | 2.8801  | -0.0134 |
| CHB | RGPD1 | 86968577 | 3.2225 | 3.5577  | -0.2533 |
| CHB | RGPD1 | 86973577 | 4.1432 | 5.5907  | -0.7385 |
| CHB | RGPD1 | 86978577 | 4.7183 | 6.946   | -0.9351 |
| CHB | RGPD1 | 86983577 | 4.0263 | 6.4378  | -1.0843 |

## 2\_TajimasD\_data

|     |       |          |         |         |         |
|-----|-------|----------|---------|---------|---------|
| CHB | RGPD1 | 86988577 | 3.1835  | 5.2519  | -1.1156 |
| CHB | RGPD1 | 86993577 | 4.0183  | 7.1154  | -1.2719 |
| CHB | RGPD1 | 86998577 | 5.733   | 6.946   | -0.5092 |
| CHB | RGPD1 | 87003577 | 4.8368  | 5.0825  | -0.1364 |
| CHB | RGPD1 | 87008577 | 4.7727  | 6.2684  | -0.6889 |
| CHB | RGPD1 | 87013577 | 6.3033  | 9.6567  | -1.0398 |
| CHB | RGPD1 | 87018577 | 6.8719  | 11.8591 | -1.2759 |
| CHB | RGPD1 | 87023577 | 6.586   | 10.6731 | -1.1544 |
| CHB | RGPD1 | 87028577 | 4.4493  | 7.6237  | -1.2241 |
| CHB | RGPD1 | 87033577 | 2.3887  | 5.0825  | -1.4955 |
| CHB | RGPD1 | 87038577 | 2.9694  | 5.7601  | -1.3865 |
| CHB | RGPD1 | 87043577 | 3.667   | 6.946   | -1.3764 |
| CHB | RGPD1 | 87048577 | 3.898   | 9.1484  | -1.7118 |
| CHB | RGPD1 | 87053577 | 7.9324  | 12.0285 | -1.0341 |
| CHB | RGPD1 | 87058577 | 13.0101 | 14.0615 | -0.229  |
| CHB | RGPD1 | 87063577 | 9.6103  | 10.8426 | -0.343  |
| CHB | RGPD1 | 87068577 | 5.3935  | 6.0989  | -0.333  |
| CHB | RGPD1 | 87073577 | 8.167   | 6.7766  | 0.5968  |
| CHB | RGPD1 | 87078577 | 7.1704  | 6.6072  | 0.2474  |
| CHB | RGPD1 | 87083577 | 6.9534  | 5.7601  | 0.5929  |
| CHB | RGPD1 | 87088577 | 8.2416  | 5.5907  | 1.3525  |
| CHB | RGPD1 | 87093577 | 12.4645 | 6.7766  | 2.4416  |
| CHB | RGPD1 | 87098577 | 11.032  | 8.1319  | 1.0541  |
| CHB | RGPD1 | 87103577 | 6.3354  | 7.9625  | -0.603  |
| CHB | RGPD1 | 87108577 | 7.608   | 8.8096  | -0.4057 |
| CHB | RGPD1 | 87113577 | 7.8758  | 9.1484  | -0.4149 |
| CHB | RGPD1 | 87118577 | 7.8615  | 7.7931  | 0.0259  |
| CHB | RGPD1 | 87123577 | 5.7559  | 6.0989  | -0.1619 |
| CHB | RGPD1 | 87128577 | 4.6878  | 4.913   | -0.1288 |
| CHB | RGPD1 | 87133577 | 4.2856  | 5.0825  | -0.4424 |
| CHB | RGPD1 | 87138577 | 5.368   | 6.946   | -0.6624 |
| CHB | RGPD1 | 87143577 | 4.0524  | 4.4048  | -0.2217 |
| CHB | RGPD1 | 87148577 | 2.9507  | 2.3718  | 0.6111  |
| CHB | RGPD1 | 87153577 | 4.1348  | 4.4048  | -0.1699 |
| CHB | RGPD1 | 87158577 | 4.1319  | 4.7436  | -0.3608 |
| CHB | RGPD1 | 87163577 | 3.3291  | 3.3883  | -0.0466 |
| CHB | RGPD1 | 87168577 | 5.0267  | 6.4378  | -0.6345 |
| CHB | RGPD1 | 87173577 | 4.2404  | 5.5907  | -0.689  |
| CHB | RGPD1 | 87178577 | 0.7969  | 0.8471  | -0.1132 |
| CHB | RGPD1 | 87183577 | 0.5366  | 0.5082  | 0.0892  |
| CHB | RGPD1 | 87188577 | 0.0662  | 0.1694  | -0.6132 |
| CHB | RGPD1 | 87193577 | 0.0662  | 0.1694  | -0.6132 |
| CHB | RGPD1 | 87198577 | 0.5208  | 0.3388  | 0.7301  |
| CHB | RGPD1 | 87203577 | 0.5208  | 0.3388  | 0.7301  |
| CHB | RGPD1 | 87208577 | 0.502   | 0.1694  | 1.9764  |
| CHB | RGPD1 | 87213577 | 1.514   | 0.8471  | 1.5039  |
| CHB | RGPD1 | 87218577 | 1.0503  | 0.8471  | 0.4582  |
| CHB | RGPD1 | 87223577 | 0.5509  | 1.5247  | -1.4467 |
| CHB | RGPD1 | 87228577 | 0.5224  | 1.5247  | -1.4891 |

## 2\_TajimasD\_data

|     |       |          |         |         |         |
|-----|-------|----------|---------|---------|---------|
| CHB | RGPD1 | 87233577 | 2.1877  | 1.1859  | 1.7882  |
| CHB | RGPD1 | 87238577 | 2.7997  | 2.033   | 0.9143  |
| CHB | RGPD1 | 87243577 | 1.4388  | 1.5247  | -0.1276 |
| CHB | RGPD1 | 87248577 | 3.0017  | 2.8801  | 0.1096  |
| CHB | RGPD1 | 87253577 | 2.1847  | 2.3718  | -0.1975 |
| CHB | RGPD1 | 87258577 | 4.4944  | 5.4213  | -0.486  |
| CHB | RGPD1 | 87263577 | 4.4944  | 5.4213  | -0.486  |
| CHB | RGPD1 | 87268577 | 1.0133  | 0.8471  | 0.3748  |
| CHB | RGPD1 | 87273577 | 4.4401  | 3.8965  | 0.3802  |
| CHB | RGPD1 | 87278577 | 4.9389  | 4.913   | 0.0148  |
| CHB | RGPD1 | 87283577 | 1.5412  | 2.3718  | -0.8768 |
| CHB | RGPD1 | 87288577 | 0.2661  | 1.3553  | -1.7653 |
| CHB | RGPD1 | 87293577 | 0.5009  | 2.3718  | -1.9749 |
| CHB | RGPD1 | 87298577 | 3.5365  | 3.7271  | -0.1385 |
| CHB | RGPD1 | 87303577 | 5.0055  | 4.7436  | 0.1545  |
| CHB | RGPD1 | 87308577 | 4.4725  | 4.7436  | -0.1599 |
| CHB | RGPD1 | 87313577 | 4.0084  | 4.066   | -0.0388 |
| CHB | RGPD1 | 87318577 | 3.9939  | 4.4048  | -0.2586 |
| CHB | RGPD1 | 87323577 | 3.6347  | 4.7436  | -0.6541 |
| CHB | RGPD1 | 87328577 | 1.016   | 3.5577  | -1.9209 |
| CHB | RGPD1 | 87333577 | 2.5618  | 3.2189  | -0.5402 |
| CHB | RGPD1 | 87338577 | 3.0773  | 3.3883  | -0.2449 |
| CHB | RGPD1 | 87343577 | 2.1717  | 2.7106  | -0.5106 |
| CHB | RGPD1 | 87348577 | 2.7028  | 2.3718  | 0.3494  |
| CHB | RGPD1 | 87353577 | 1.6988  | 2.3718  | -0.7104 |
| CHB | RGPD1 | 87358577 | 2.6619  | 4.4048  | -1.0967 |
| CHB | RGPD1 | 87363577 | 5.1148  | 7.6237  | -0.9675 |
| CHB | RGPD1 | 87368577 | 5.8917  | 8.1319  | -0.8143 |
| CHB | RGPD1 | 87373577 | 6.9558  | 10.6731 | -1.0499 |
| CHB | RGPD1 | 87378577 | 4.0628  | 6.946   | -1.2103 |
| CHB | RGPD1 | 87383577 | 0.0668  | 0.3388  | -1.0911 |
| CHB | RGPD1 | 87388577 | 2.2856  | 4.2354  | -1.2693 |
| CHB | RGPD1 | 87393577 | 5.2861  | 7.6237  | -0.9014 |
| CHB | RGPD1 | 87398577 | 6.637   | 7.4543  | -0.3217 |
| CHB | RGPD1 | 87403577 | 10.2079 | 7.9625  | 0.8321  |
| CHB | RGPD1 | 87408577 | 14.2456 | 9.3178  | 1.5795  |
| CHB | RGPD1 | 87413577 | 14.024  | 9.3178  | 1.5085  |
| CHB | RGPD1 | 87418577 | 11.0296 | 7.9625  | 1.1366  |
| CHB | RGPD1 | 87423577 | 8.3723  | 9.1484  | -0.253  |
| CHB | RGPD1 | 87428577 | 12.2806 | 12.3673 | -0.0213 |
| CHB | RGPD1 | 87433577 | 12.0322 | 9.9955  | 0.6116  |
| CHB | RGPD1 | 87438577 | 7.3745  | 5.7601  | 0.8021  |
| CHB | RGPD1 | 87443577 | 10.2935 | 6.4378  | 1.7336  |
| CHB | RGPD1 | 87448577 | 11.2269 | 8.8096  | 0.8161  |
| CHB | RGPD1 | 87453577 | 6.7992  | 8.8096  | -0.6788 |
| CHB | RGPD1 | 87458577 | 3.3786  | 6.2684  | -1.3309 |
| CHB | RGPD1 | 87463577 | 2.4771  | 5.0825  | -1.4465 |
| CHB | RGPD1 | 87468577 | 2.9636  | 6.0989  | -1.48   |
| CHB | RGPD1 | 87473577 | 3.6926  | 7.7931  | -1.5498 |

## 2\_TajimasD\_data

|     |       |          |         |         |         |
|-----|-------|----------|---------|---------|---------|
| CHB | RGPD1 | 87478577 | 6.748   | 9.9955  | -0.9752 |
| CHB | RGPD1 | 87483577 | 9.8226  | 10.6731 | -0.2402 |
| CHB | RGPD1 | 87488577 | 8.8468  | 9.9955  | -0.3449 |
| CHB | RGPD1 | 87493577 | 5.1824  | 7.1154  | -0.7938 |
| CHB | RGPD1 | 87498577 | 3.5024  | 6.6072  | -1.3637 |
| CHB | RGPD1 | 87503577 | 8.4043  | 11.5202 | -0.8192 |
| CHB | RGPD1 | 87508577 | 9.814   | 12.1979 | -0.5939 |
| YRI | RGPD1 | 86418577 | 18.3879 | 15.2937 | 0.62    |
| YRI | RGPD1 | 86423577 | 18.6379 | 14.4534 | 0.8848  |
| YRI | RGPD1 | 86428577 | 12.2794 | 11.7644 | 0.1323  |
| YRI | RGPD1 | 86433577 | 9.0413  | 11.2602 | -0.594  |
| YRI | RGPD1 | 86438577 | 7.223   | 11.0921 | -1.0505 |
| YRI | RGPD1 | 86443577 | 8.5123  | 11.9324 | -0.867  |
| YRI | RGPD1 | 86448577 | 11.2112 | 13.445  | -0.5059 |
| YRI | RGPD1 | 86453577 | 15.9668 | 16.4701 | -0.094  |
| YRI | RGPD1 | 86458577 | 13.3234 | 15.7978 | -0.4807 |
| YRI | RGPD1 | 86463577 | 8.8669  | 14.2853 | -1.1585 |
| YRI | RGPD1 | 86468577 | 7.974   | 13.445  | -1.239  |
| YRI | RGPD1 | 86473577 | 8.4655  | 13.1089 | -1.0771 |
| YRI | RGPD1 | 86478577 | 11.5069 | 14.4534 | -0.623  |
| YRI | RGPD1 | 86483577 | 12.6552 | 15.6298 | -0.5838 |
| YRI | RGPD1 | 86488577 | 12.9142 | 15.6298 | -0.533  |
| YRI | RGPD1 | 86493577 | 14.4249 | 16.8062 | -0.436  |
| YRI | RGPD1 | 86498577 | 14.9624 | 16.9743 | -0.3649 |
| YRI | RGPD1 | 86503577 | 13.6078 | 15.6298 | -0.3968 |
| YRI | RGPD1 | 86508577 | 17.7883 | 18.6549 | -0.1436 |
| YRI | RGPD1 | 86513577 | 17.6612 | 18.1507 | -0.0833 |
| YRI | RGPD1 | 86518577 | 13.1424 | 13.613  | -0.1053 |
| YRI | RGPD1 | 86523577 | 14.3692 | 12.7727 | 0.3795  |
| YRI | RGPD1 | 86528577 | 13.7987 | 13.1089 | 0.16    |
| YRI | RGPD1 | 86533577 | 12.2006 | 12.2685 | -0.0168 |
| YRI | RGPD1 | 86538577 | 10.6467 | 11.9324 | -0.3259 |
| YRI | RGPD1 | 86543577 | 8.9628  | 11.5963 | -0.6858 |
| YRI | RGPD1 | 86548577 | 7.6628  | 10.924  | -0.8982 |
| YRI | RGPD1 | 86553577 | 8.5968  | 11.0921 | -0.6775 |
| YRI | RGPD1 | 86558577 | 10.273  | 11.9324 | -0.4207 |
| YRI | RGPD1 | 86563577 | 9.9669  | 13.1089 | -0.7288 |
| YRI | RGPD1 | 86568577 | 9.3132  | 12.4366 | -0.7615 |
| YRI | RGPD1 | 86573577 | 9.3645  | 11.9324 | -0.651  |
| YRI | RGPD1 | 86578577 | 11.0417 | 12.9408 | -0.4459 |
| YRI | RGPD1 | 86583577 | 9.9466  | 11.7644 | -0.467  |
| YRI | RGPD1 | 86588577 | 8.1412  | 11.4282 | -0.8678 |
| YRI | RGPD1 | 86593577 | 11.4727 | 12.7727 | -0.3091 |
| YRI | RGPD1 | 86598577 | 14.5911 | 13.9492 | 0.1404  |
| YRI | RGPD1 | 86603577 | 16.4815 | 16.6382 | -0.029  |
| YRI | RGPD1 | 86608577 | 18.8467 | 18.991  | -0.0235 |
| YRI | RGPD1 | 86613577 | 15.9931 | 17.1423 | -0.2065 |
| YRI | RGPD1 | 86618577 | 13.7115 | 15.6298 | -0.3765 |
| YRI | RGPD1 | 86623577 | 18.4502 | 19.4952 | -0.1659 |

## 2\_TajimasD\_data

|     |       |          |         |         |         |
|-----|-------|----------|---------|---------|---------|
| YRI | RGPD1 | 86628577 | 19.6312 | 18.6549 | 0.1617  |
| YRI | RGPD1 | 86633577 | 12.4148 | 13.7811 | -0.3023 |
| YRI | RGPD1 | 86638577 | 12.0487 | 15.1256 | -0.623  |
| YRI | RGPD1 | 86643577 | 16.6634 | 15.4617 | 0.2383  |
| YRI | RGPD1 | 86648577 | 12.9369 | 12.1005 | 0.2093  |
| YRI | RGPD1 | 86653577 | 14.1598 | 11.9324 | 0.5646  |
| YRI | RGPD1 | 86658577 | 12.7064 | 10.5879 | 0.6008  |
| YRI | RGPD1 | 86663577 | 7.4264  | 10.756  | -0.9304 |
| YRI | RGPD1 | 86668577 | 7.4053  | 13.613  | -1.3894 |
| YRI | RGPD1 | 86673577 | 5.4956  | 12.2685 | -1.6726 |
| YRI | RGPD1 | 86678577 | 5.7033  | 9.9157  | -1.27   |
| YRI | RGPD1 | 86683577 | 5.8944  | 9.2434  | -1.0778 |
| YRI | RGPD1 | 86688577 | 6.8007  | 9.9157  | -0.9392 |
| YRI | RGPD1 | 86693577 | 8.0877  | 11.4282 | -0.8819 |
| YRI | RGPD1 | 86698577 | 7.2146  | 10.5879 | -0.9567 |
| YRI | RGPD1 | 86703577 | 6.597   | 10.5879 | -1.1318 |
| YRI | RGPD1 | 86708577 | 5.8936  | 10.0837 | -1.2437 |
| YRI | RGPD1 | 86713577 | 7.2947  | 10.0837 | -0.8278 |
| YRI | RGPD1 | 86718577 | 9.5674  | 13.1089 | -0.8215 |
| YRI | RGPD1 | 86723577 | 11.0915 | 14.4534 | -0.7109 |
| YRI | RGPD1 | 86728577 | 11.1653 | 13.9492 | -0.6088 |
| YRI | RGPD1 | 86733577 | 8.2106  | 11.2602 | -0.8164 |
| YRI | RGPD1 | 86738577 | 6.4113  | 9.2434  | -0.9114 |
| YRI | RGPD1 | 86743577 | 6.1042  | 9.0754  | -0.9726 |
| YRI | RGPD1 | 86748577 | 5.6564  | 9.4115  | -1.1885 |
| YRI | RGPD1 | 86753577 | 9.2602  | 12.6047 | -0.8051 |
| YRI | RGPD1 | 86758577 | 9.6002  | 12.7727 | -0.7542 |
| YRI | RGPD1 | 86763577 | 8.6951  | 11.2602 | -0.6867 |
| YRI | RGPD1 | 86768577 | 9.0682  | 11.9324 | -0.7261 |
| YRI | RGPD1 | 86773577 | 10.3756 | 14.7895 | -0.9131 |
| YRI | RGPD1 | 86778577 | 13.7932 | 16.302  | -0.473  |
| YRI | RGPD1 | 86783577 | 9.8343  | 14.7895 | -1.0251 |
| YRI | RGPD1 | 86788577 | 7.0415  | 12.7727 | -1.3625 |
| YRI | RGPD1 | 86793577 | 8.2859  | 9.5795  | -0.4027 |
| YRI | RGPD1 | 86798577 | 8.0263  | 10.5879 | -0.7265 |
| YRI | RGPD1 | 86803577 | 10.4056 | 12.7727 | -0.5627 |
| YRI | RGPD1 | 86808577 | 8.9088  | 10.4199 | -0.435  |
| YRI | RGPD1 | 86813577 | 5.9838  | 8.5712  | -0.8929 |
| YRI | RGPD1 | 86818577 | 11.1255 | 10.0837 | 0.3092  |
| YRI | RGPD1 | 86823577 | 13.4558 | 11.9324 | 0.3862  |
| YRI | RGPD1 | 86828577 | 9.9611  | 12.2685 | -0.5698 |
| YRI | RGPD1 | 86833577 | 9.0582  | 12.2685 | -0.7928 |
| YRI | RGPD1 | 86838577 | 13.6735 | 15.6298 | -0.3839 |
| YRI | RGPD1 | 86843577 | 12.333  | 13.9492 | -0.3535 |
| YRI | RGPD1 | 86848577 | 9.2834  | 12.2685 | -0.7372 |
| YRI | RGPD1 | 86853577 | 11.8094 | 13.7811 | -0.4362 |
| YRI | RGPD1 | 86858577 | 11.5488 | 14.9575 | -0.6976 |
| YRI | RGPD1 | 86863577 | 8.8713  | 14.4534 | -1.1803 |
| YRI | RGPD1 | 86868577 | 8.0457  | 12.2685 | -1.0428 |

## 2\_TajimasD\_data

|     |       |          |         |         |         |
|-----|-------|----------|---------|---------|---------|
| YRI | RGPD1 | 86873577 | 8.1785  | 11.4282 | -0.8579 |
| YRI | RGPD1 | 86878577 | 6.825   | 8.4031  | -0.5546 |
| YRI | RGPD1 | 86883577 | 4.107   | 5.7141  | -0.8014 |
| YRI | RGPD1 | 86888577 | 6.5143  | 10.4199 | -1.1243 |
| YRI | RGPD1 | 86893577 | 9.2932  | 14.4534 | -1.0911 |
| YRI | RGPD1 | 86898577 | 6.2283  | 11.7644 | -1.4223 |
| YRI | RGPD1 | 86903577 | 4.5221  | 9.7476  | -1.6008 |
| YRI | RGPD1 | 86908577 | 3.6641  | 9.7476  | -1.8636 |
| YRI | RGPD1 | 86913577 | 3.5038  | 10.756  | -2.0266 |
| YRI | RGPD1 | 86918577 | 5.78    | 10.756  | -1.3905 |
| YRI | RGPD1 | 86923577 | 4.9393  | 10.0837 | -1.5269 |
| YRI | RGPD1 | 86928577 | 4.1206  | 11.2602 | -1.9113 |
| YRI | RGPD1 | 86933577 | 5.7528  | 15.2937 | -1.9117 |
| YRI | RGPD1 | 86938577 | 6.3499  | 12.9408 | -1.5476 |
| YRI | RGPD1 | 86943577 | 6.8155  | 10.2518 | -1.0043 |
| YRI | RGPD1 | 86948577 | 7.654   | 9.5795  | -0.5995 |
| YRI | RGPD1 | 86953577 | 7.0658  | 6.3864  | 0.3066  |
| YRI | RGPD1 | 86958577 | 5.1336  | 4.5377  | 0.3641  |
| YRI | RGPD1 | 86963577 | 4.9851  | 3.1932  | 1.4778  |
| YRI | RGPD1 | 86968577 | 7.7043  | 8.4031  | -0.2456 |
| YRI | RGPD1 | 86973577 | 9.8801  | 12.1005 | -0.5555 |
| YRI | RGPD1 | 86978577 | 10.9295 | 11.4282 | -0.1317 |
| YRI | RGPD1 | 86983577 | 10.2175 | 11.7644 | -0.3974 |
| YRI | RGPD1 | 86988577 | 7.5482  | 10.4199 | -0.8267 |
| YRI | RGPD1 | 86993577 | 7.9685  | 10.924  | -0.814  |
| YRI | RGPD1 | 86998577 | 10.27   | 11.5963 | -0.3454 |
| YRI | RGPD1 | 87003577 | 9.2181  | 10.4199 | -0.346  |
| YRI | RGPD1 | 87008577 | 7.3385  | 10.0837 | -0.8148 |
| YRI | RGPD1 | 87013577 | 9.9694  | 13.445  | -0.7871 |
| YRI | RGPD1 | 87018577 | 13.05   | 14.9575 | -0.3904 |
| YRI | RGPD1 | 87023577 | 13.0719 | 13.613  | -0.1211 |
| YRI | RGPD1 | 87028577 | 9.5705  | 12.4366 | -0.6988 |
| YRI | RGPD1 | 87033577 | 8.5273  | 11.9324 | -0.8632 |
| YRI | RGPD1 | 87038577 | 11.964  | 13.2769 | -0.3009 |
| YRI | RGPD1 | 87043577 | 11.6292 | 12.7727 | -0.2718 |
| YRI | RGPD1 | 87048577 | 9.7885  | 12.9408 | -0.7402 |
| YRI | RGPD1 | 87053577 | 12.7049 | 14.7895 | -0.4312 |
| YRI | RGPD1 | 87058577 | 21.2437 | 17.8146 | 0.5938  |
| YRI | RGPD1 | 87063577 | 17.5624 | 16.6382 | 0.1709  |
| YRI | RGPD1 | 87068577 | 8.6705  | 11.9324 | -0.8269 |
| YRI | RGPD1 | 87073577 | 10.4235 | 12.2685 | -0.4556 |
| YRI | RGPD1 | 87078577 | 8.9663  | 12.1005 | -0.7841 |
| YRI | RGPD1 | 87083577 | 7.6578  | 10.2518 | -0.7582 |
| YRI | RGPD1 | 87088577 | 9.4457  | 10.5879 | -0.3239 |
| YRI | RGPD1 | 87093577 | 15.2737 | 13.2769 | 0.4576  |
| YRI | RGPD1 | 87098577 | 17.21   | 14.1172 | 0.6687  |
| YRI | RGPD1 | 87103577 | 15.7863 | 12.1005 | 0.9221  |
| YRI | RGPD1 | 87108577 | 15.028  | 12.4366 | 0.6318  |
| YRI | RGPD1 | 87113577 | 15.4746 | 13.7811 | 0.3747  |

## 2\_TajimasD\_data

|     |       |          |         |         |         |
|-----|-------|----------|---------|---------|---------|
| YRI | RGPD1 | 87118577 | 12.0926 | 13.2769 | -0.2714 |
| YRI | RGPD1 | 87123577 | 5.4702  | 10.0837 | -1.3694 |
| YRI | RGPD1 | 87128577 | 3.9702  | 6.8906  | -1.2306 |
| YRI | RGPD1 | 87133577 | 2.9497  | 6.5544  | -1.5892 |
| YRI | RGPD1 | 87138577 | 6.9423  | 7.3947  | -0.1788 |
| YRI | RGPD1 | 87143577 | 6.0726  | 5.8822  | 0.0925  |
| YRI | RGPD1 | 87148577 | 2.9968  | 6.0502  | -1.4467 |
| YRI | RGPD1 | 87153577 | 4.0761  | 7.7309  | -1.3867 |
| YRI | RGPD1 | 87158577 | 4.6923  | 8.7392  | -1.3718 |
| YRI | RGPD1 | 87163577 | 4.3539  | 7.2267  | -1.1592 |
| YRI | RGPD1 | 87168577 | 7.7813  | 11.4282 | -0.9628 |
| YRI | RGPD1 | 87173577 | 6.5517  | 9.5795  | -0.9427 |
| YRI | RGPD1 | 87178577 | 0.5765  | 0.8403  | -0.5958 |
| YRI | RGPD1 | 87183577 | 0.2484  | 0.6722  | -1.1095 |
| YRI | RGPD1 | 87188577 | 0.1762  | 0.5042  | -1.0308 |
| YRI | RGPD1 | 87193577 | 0.1314  | 0.3361  | -0.8218 |
| YRI | RGPD1 | 87198577 | 0.643   | 0.5042  | 0.4362  |
| YRI | RGPD1 | 87203577 | 0.6525  | 0.8403  | -0.4242 |
| YRI | RGPD1 | 87208577 | 0.5349  | 0.6722  | -0.3594 |
| YRI | RGPD1 | 87213577 | 0.7876  | 0.8403  | -0.119  |
| YRI | RGPD1 | 87218577 | 0.2805  | 0.6722  | -1.0254 |
| YRI | RGPD1 | 87223577 | 0.1924  | 1.5126  | -1.9658 |
| YRI | RGPD1 | 87228577 | 0.2109  | 1.6806  | -2.0219 |
| YRI | RGPD1 | 87233577 | 2.3546  | 1.8487  | 0.6471  |
| YRI | RGPD1 | 87238577 | 4.3236  | 4.0335  | 0.1963  |
| YRI | RGPD1 | 87243577 | 2.4856  | 3.0251  | -0.4654 |
| YRI | RGPD1 | 87248577 | 3.645   | 4.2016  | -0.3636 |
| YRI | RGPD1 | 87253577 | 3.1745  | 3.6974  | -0.3811 |
| YRI | RGPD1 | 87258577 | 7.6545  | 7.0586  | 0.2457  |
| YRI | RGPD1 | 87263577 | 7.6269  | 6.8906  | 0.3103  |
| YRI | RGPD1 | 87268577 | 0.8634  | 1.0084  | -0.2891 |
| YRI | RGPD1 | 87273577 | 3.5876  | 6.3864  | -1.2632 |
| YRI | RGPD1 | 87278577 | 4.8253  | 8.7392  | -1.3267 |
| YRI | RGPD1 | 87283577 | 2.3687  | 4.8738  | -1.438  |
| YRI | RGPD1 | 87288577 | 1.3541  | 4.0335  | -1.8129 |
| YRI | RGPD1 | 87293577 | 2.2602  | 7.3947  | -2.0289 |
| YRI | RGPD1 | 87298577 | 4.5501  | 9.5795  | -1.5658 |
| YRI | RGPD1 | 87303577 | 5.4913  | 8.4031  | -1.0234 |
| YRI | RGPD1 | 87308577 | 5.2557  | 9.5795  | -1.3461 |
| YRI | RGPD1 | 87313577 | 4.9622  | 9.0754  | -1.3464 |
| YRI | RGPD1 | 87318577 | 3.5647  | 6.0502  | -1.1776 |
| YRI | RGPD1 | 87323577 | 4.8252  | 5.7141  | -0.4433 |
| YRI | RGPD1 | 87328577 | 3.4268  | 4.2016  | -0.5061 |
| YRI | RGPD1 | 87333577 | 3.4428  | 4.3696  | -0.5852 |
| YRI | RGPD1 | 87338577 | 3.8731  | 5.2099  | -0.7236 |
| YRI | RGPD1 | 87343577 | 2.1964  | 4.8738  | -1.5369 |
| YRI | RGPD1 | 87348577 | 2.8165  | 4.5377  | -1.0517 |
| YRI | RGPD1 | 87353577 | 2.2064  | 3.8654  | -1.1642 |
| YRI | RGPD1 | 87358577 | 3.1229  | 7.5628  | -1.7188 |



## 2\_TajimasD\_data

|     |        |          |         |         |         |
|-----|--------|----------|---------|---------|---------|
| YRI | RGPD1  | 87363577 | 5.147   | 10.5879 | -1.543  |
| YRI | RGPD1  | 87368577 | 6.4849  | 10.924  | -1.2226 |
| YRI | RGPD1  | 87373577 | 8.8888  | 13.9492 | -1.1067 |
| YRI | RGPD1  | 87378577 | 5.2391  | 8.067   | -1.0319 |
| YRI | RGPD1  | 87383577 | 0.3337  | 0.8403  | -1.1442 |
| YRI | RGPD1  | 87388577 | 4.7463  | 6.5544  | -0.7972 |
| YRI | RGPD1  | 87393577 | 8.5779  | 10.5879 | -0.57   |
| YRI | RGPD1  | 87398577 | 9.1218  | 10.4199 | -0.3737 |
| YRI | RGPD1  | 87403577 | 11.7433 | 11.2602 | 0.1293  |
| YRI | RGPD1  | 87408577 | 15.7789 | 12.2685 | 0.8669  |
| YRI | RGPD1  | 87413577 | 15.7111 | 11.7644 | 1.0139  |
| YRI | RGPD1  | 87418577 | 13.3809 | 11.7644 | 0.4153  |
| YRI | RGPD1  | 87423577 | 11.8259 | 14.4534 | -0.5556 |
| YRI | RGPD1  | 87428577 | 14.9103 | 16.302  | -0.2624 |
| YRI | RGPD1  | 87433577 | 14.1001 | 12.6047 | 0.36    |
| YRI | RGPD1  | 87438577 | 8.0214  | 7.8989  | 0.0456  |
| YRI | RGPD1  | 87443577 | 11.0097 | 10.2518 | 0.2215  |
| YRI | RGPD1  | 87448577 | 15.1009 | 17.3104 | -0.3933 |
| YRI | RGPD1  | 87453577 | 13.2715 | 18.823  | -0.9118 |
| YRI | RGPD1  | 87458577 | 9.8578  | 17.1423 | -1.3088 |
| YRI | RGPD1  | 87463577 | 8.1675  | 17.3104 | -1.6274 |
| YRI | RGPD1  | 87468577 | 8.4404  | 14.9575 | -1.3338 |
| YRI | RGPD1  | 87473577 | 9.6604  | 16.302  | -1.2521 |
| YRI | RGPD1  | 87478577 | 13.8936 | 20.3355 | -0.9822 |
| YRI | RGPD1  | 87483577 | 16.9396 | 18.823  | -0.3093 |
| YRI | RGPD1  | 87488577 | 14.0481 | 15.4617 | -0.2803 |
| YRI | RGPD1  | 87493577 | 8.411   | 9.7476  | -0.4095 |
| YRI | RGPD1  | 87498577 | 6.8054  | 8.235   | -0.5119 |
| YRI | RGPD1  | 87503577 | 14.8205 | 15.2937 | -0.0948 |
| YRI | RGPD1  | 87508577 | 17.1953 | 18.6549 | -0.2418 |
| CEU | SPDYE3 | 99811798 | 16.1692 | 11.9394 | 1.0784  |
| CEU | SPDYE3 | 99816798 | 15.8281 | 11.2571 | 1.2317  |
| CEU | SPDYE3 | 99821798 | 10.7168 | 8.187   | 0.9165  |
| CEU | SPDYE3 | 99826798 | 8.5549  | 6.9931  | 0.6535  |
| CEU | SPDYE3 | 99831798 | 4.8077  | 5.9697  | -0.5608 |
| CEU | SPDYE3 | 99836798 | 2.7835  | 4.2641  | -0.9611 |
| CEU | SPDYE3 | 99841798 | 3.6854  | 4.9463  | -0.7191 |
| CEU | SPDYE3 | 99846798 | 6.2946  | 6.8225  | -0.2259 |
| CEU | SPDYE3 | 99851798 | 4.5523  | 5.458   | -0.4735 |
| CEU | SPDYE3 | 99856798 | 1.4651  | 3.4112  | -1.5285 |
| CEU | SPDYE3 | 99861798 | 2.2235  | 3.2407  | -0.8341 |
| CEU | SPDYE3 | 99866798 | 2.3249  | 3.7524  | -1.0342 |
| CEU | SPDYE3 | 99871798 | 4.3908  | 5.458   | -0.5579 |
| CEU | SPDYE3 | 99876798 | 5.115   | 6.3108  | -0.549  |
| CEU | SPDYE3 | 99881798 | 3.4725  | 4.4346  | -0.6037 |
| CEU | SPDYE3 | 99886798 | 2.9427  | 3.7524  | -0.5866 |
| CEU | SPDYE3 | 99891798 | 3.9091  | 6.4814  | -1.1529 |
| CEU | SPDYE3 | 99896798 | 4.1334  | 5.9697  | -0.8862 |
| CEU | SPDYE3 | 99901798 | 3.7306  | 4.2641  | -0.3463 |

## 2\_TajimasD\_data

|     |        |           |        |        |         |
|-----|--------|-----------|--------|--------|---------|
| CEU | SPDYE3 | 99906798  | 3.1598 | 3.5818 | -0.3181 |
| CEU | SPDYE3 | 99911798  | 2.0228 | 3.0701 | -0.8984 |
| CEU | SPDYE3 | 99916798  | 2.2904 | 4.0935 | -1.2125 |
| CEU | SPDYE3 | 99921798  | 2.947  | 4.6052 | -1.0068 |
| CEU | SPDYE3 | 99926798  | 3.4296 | 4.9463 | -0.865  |
| CEU | SPDYE3 | 99931798  | 4.644  | 5.9697 | -0.6398 |
| CEU | SPDYE3 | 99936798  | 7.0835 | 6.8225 | 0.1117  |
| CEU | SPDYE3 | 99941798  | 5.5131 | 5.6286 | -0.0588 |
| CEU | SPDYE3 | 99946798  | 7.3913 | 8.187  | -0.2883 |
| CEU | SPDYE3 | 99951798  | 9.0691 | 8.6987 | 0.1269  |
| CEU | SPDYE3 | 99956798  | 4.4226 | 5.458  | -0.5413 |
| CEU | SPDYE3 | 99961798  | 3.2653 | 5.9697 | -1.3052 |
| CEU | SPDYE3 | 99966798  | 4.1548 | 6.4814 | -1.0428 |
| CEU | SPDYE3 | 99971798  | 5.6601 | 6.3108 | -0.2987 |
| CEU | SPDYE3 | 99976798  | 5.517  | 5.9697 | -0.2185 |
| CEU | SPDYE3 | 99981798  | 3.7285 | 4.6052 | -0.5323 |
| CEU | SPDYE3 | 99986798  | 4.7904 | 4.0935 | 0.4686  |
| CEU | SPDYE3 | 99991798  | 3.8549 | 4.0935 | -0.1604 |
| CEU | SPDYE3 | 99996798  | 2.1511 | 4.0935 | -1.3061 |
| CEU | SPDYE3 | 100001798 | 3.6737 | 3.7524 | -0.057  |
| CEU | SPDYE3 | 100006798 | 3.8411 | 3.4112 | 0.3377  |
| CEU | SPDYE3 | 100011798 | 5.4045 | 5.2874 | 0.063   |
| CEU | SPDYE3 | 100016798 | 5.9239 | 6.3108 | -0.1776 |
| CEU | SPDYE3 | 100021798 | 4.9652 | 5.7991 | -0.413  |
| CEU | SPDYE3 | 100026798 | 5.2775 | 6.8225 | -0.6611 |
| CEU | SPDYE3 | 100031798 | 3.8369 | 6.9931 | -1.3206 |
| CEU | SPDYE3 | 100036798 | 3.5582 | 5.458  | -0.9932 |
| CEU | SPDYE3 | 100041798 | 4.746  | 5.2874 | -0.2911 |
| CEU | SPDYE3 | 100046798 | 3.7574 | 5.1169 | -0.7525 |
| CEU | SPDYE3 | 100051798 | 2.9691 | 4.6052 | -0.9934 |
| CEU | SPDYE3 | 100056798 | 2.5628 | 4.0935 | -1.0293 |
| CEU | SPDYE3 | 100061798 | 2.208  | 3.4112 | -0.945  |
| CEU | SPDYE3 | 100066798 | 3.8128 | 5.1169 | -0.7218 |
| CEU | SPDYE3 | 100071798 | 4.2643 | 5.1169 | -0.4719 |
| CEU | SPDYE3 | 100076798 | 6.7891 | 5.6286 | 0.5903  |
| CEU | SPDYE3 | 100081798 | 5.6184 | 6.4814 | -0.3868 |
| CEU | SPDYE3 | 100086798 | 4.0946 | 6.1402 | -0.9626 |
| CEU | SPDYE3 | 100091798 | 4.9586 | 6.1402 | -0.556  |
| CEU | SPDYE3 | 100096798 | 4.1113 | 4.9463 | -0.4762 |
| CEU | SPDYE3 | 100101798 | 3.9101 | 4.7757 | -0.5091 |
| CEU | SPDYE3 | 100106798 | 3.9281 | 5.1169 | -0.658  |
| CEU | SPDYE3 | 100111798 | 2.9002 | 3.4112 | -0.4013 |
| CEU | SPDYE3 | 100116798 | 5.0938 | 5.1169 | -0.0128 |
| CEU | SPDYE3 | 100121798 | 6.3342 | 6.8225 | -0.2089 |
| CEU | SPDYE3 | 100126798 | 3.6052 | 5.9697 | -1.1411 |
| CEU | SPDYE3 | 100131798 | 3.1179 | 5.9697 | -1.3763 |
| CEU | SPDYE3 | 100136798 | 3.0693 | 5.1169 | -1.1334 |
| CEU | SPDYE3 | 100141798 | 2.6895 | 4.0935 | -0.9441 |
| CEU | SPDYE3 | 100146798 | 2.2249 | 4.2641 | -1.3237 |

## 2\_TajimasD\_data

|     |        |           |         |         |         |
|-----|--------|-----------|---------|---------|---------|
| CEU | SPDYE3 | 100151798 | 2.3517  | 4.9463  | -1.4797 |
| CEU | SPDYE3 | 100156798 | 2.7015  | 4.9463  | -1.2802 |
| CEU | SPDYE3 | 100161798 | 2.7407  | 5.9697  | -1.5584 |
| CEU | SPDYE3 | 100166798 | 1.9307  | 5.6286  | -1.881  |
| CEU | SPDYE3 | 100171798 | 3.1648  | 6.1402  | -1.4001 |
| CEU | SPDYE3 | 100176798 | 4.9939  | 8.0164  | -1.1164 |
| CEU | SPDYE3 | 100181798 | 3.9817  | 6.9931  | -1.26   |
| CEU | SPDYE3 | 100186798 | 1.7372  | 3.9229  | -1.5245 |
| CEU | SPDYE3 | 100191798 | 0.9802  | 2.5584  | -1.5721 |
| CEU | SPDYE3 | 100196798 | 3.0829  | 4.4346  | -0.8481 |
| CEU | SPDYE3 | 100201798 | 3.4809  | 4.9463  | -0.8357 |
| CEU | SPDYE3 | 100206798 | 2.7749  | 4.4346  | -1.0414 |
| CEU | SPDYE3 | 100211798 | 6.1222  | 7.1636  | -0.4263 |
| CEU | SPDYE3 | 100216798 | 7.4247  | 7.8459  | -0.1587 |
| CEU | SPDYE3 | 100221798 | 7.6922  | 8.5281  | -0.2917 |
| CEU | SPDYE3 | 100226798 | 5.9895  | 7.3342  | -0.5388 |
| CEU | SPDYE3 | 100231798 | 6.6737  | 5.9697  | 0.3398  |
| CEU | SPDYE3 | 100236798 | 8.3634  | 6.9931  | 0.5734  |
| CEU | SPDYE3 | 100241798 | 3.9777  | 5.1169  | -0.6306 |
| CEU | SPDYE3 | 100246798 | 2.1956  | 4.6052  | -1.463  |
| CEU | SPDYE3 | 100251798 | 3.6125  | 4.7757  | -0.6841 |
| CEU | SPDYE3 | 100256798 | 3.4088  | 3.9229  | -0.3586 |
| CEU | SPDYE3 | 100261798 | 6.8017  | 7.5047  | -0.2758 |
| CEU | SPDYE3 | 100266798 | 6.8699  | 8.187   | -0.4772 |
| CEU | SPDYE3 | 100271798 | 2.2208  | 5.458   | -1.6923 |
| CEU | SPDYE3 | 100276798 | 4.6726  | 8.0164  | -1.235  |
| CEU | SPDYE3 | 100281798 | 6.5446  | 9.3809  | -0.9061 |
| CEU | SPDYE3 | 100286798 | 5.5168  | 7.5047  | -0.78   |
| CEU | SPDYE3 | 100291798 | 4.9076  | 5.6286  | -0.3667 |
| CEU | SPDYE3 | 100296798 | 8.4304  | 7.3342  | 0.4392  |
| CEU | SPDYE3 | 100301798 | 8.6516  | 8.6987  | -0.0161 |
| CEU | SPDYE3 | 100306798 | 7.9835  | 8.5281  | -0.19   |
| CEU | SPDYE3 | 100311798 | 11.3385 | 9.8926  | 0.4397  |
| CEU | SPDYE3 | 100316798 | 8.9361  | 9.0398  | -0.0343 |
| CEU | SPDYE3 | 100321798 | 4.502   | 6.3108  | -0.8305 |
| CEU | SPDYE3 | 100326798 | 5.2379  | 6.4814  | -0.5574 |
| CEU | SPDYE3 | 100331798 | 7.8592  | 8.8692  | -0.3399 |
| CEU | SPDYE3 | 100336798 | 4.9864  | 7.3342  | -0.9407 |
| CEU | SPDYE3 | 100341798 | 3.678   | 7.1636  | -1.4268 |
| CEU | SPDYE3 | 100346798 | 6.65    | 11.0866 | -1.2127 |
| CEU | SPDYE3 | 100351798 | 7.1874  | 11.2571 | -1.0966 |
| CEU | SPDYE3 | 100356798 | 7.4292  | 9.8926  | -0.749  |
| CEU | SPDYE3 | 100361798 | 9.9233  | 10.0632 | -0.0419 |
| CEU | SPDYE3 | 100366798 | 13.2494 | 11.5982 | 0.4326  |
| CEU | SPDYE3 | 100371798 | 16.4204 | 12.7922 | 0.8667  |
| CEU | SPDYE3 | 100376798 | 15.0354 | 12.4511 | 0.6333  |
| CEU | SPDYE3 | 100381798 | 10.8773 | 13.4744 | -0.5906 |
| CEU | SPDYE3 | 100386798 | 8.9773  | 12.6216 | -0.8817 |
| CEU | SPDYE3 | 100391798 | 7.7367  | 9.2104  | -0.4789 |

## 2\_TajimasD\_data

|     |        |           |         |         |         |
|-----|--------|-----------|---------|---------|---------|
| CEU | SPDYE3 | 100396798 | 7.0883  | 8.187   | -0.398  |
| CEU | SPDYE3 | 100401798 | 6.8932  | 6.8225  | 0.0303  |
| CEU | SPDYE3 | 100406798 | 8.6092  | 6.8225  | 0.7645  |
| CEU | SPDYE3 | 100411798 | 9.9443  | 8.8692  | 0.3618  |
| CEU | SPDYE3 | 100416798 | 8.3565  | 8.5281  | -0.0599 |
| CEU | SPDYE3 | 100421798 | 6.9704  | 6.8225  | 0.0633  |
| CEU | SPDYE3 | 100426798 | 7.012   | 6.1402  | 0.4102  |
| CEU | SPDYE3 | 100431798 | 8.6174  | 8.5281  | 0.0312  |
| CEU | SPDYE3 | 100436798 | 8.1325  | 9.2104  | -0.3503 |
| CEU | SPDYE3 | 100441798 | 7.2066  | 8.6987  | -0.5112 |
| CEU | SPDYE3 | 100446798 | 5.625   | 7.5047  | -0.7375 |
| CEU | SPDYE3 | 100451798 | 5.9998  | 6.4814  | -0.2159 |
| CEU | SPDYE3 | 100456798 | 8.3193  | 7.6753  | 0.2475  |
| CEU | SPDYE3 | 100461798 | 7.3286  | 6.9931  | 0.1404  |
| CEU | SPDYE3 | 100466798 | 7.786   | 7.3342  | 0.181   |
| CEU | SPDYE3 | 100471798 | 9.5354  | 8.3576  | 0.4187  |
| CEU | SPDYE3 | 100476798 | 6.8526  | 7.3342  | -0.193  |
| CEU | SPDYE3 | 100481798 | 7.4071  | 8.0164  | -0.225  |
| CEU | SPDYE3 | 100486798 | 7.0998  | 7.3342  | -0.0939 |
| CEU | SPDYE3 | 100491798 | 7.0299  | 6.8225  | 0.0887  |
| CEU | SPDYE3 | 100496798 | 15.6127 | 10.4043 | 1.5109  |
| CEU | SPDYE3 | 100501798 | 13.1117 | 8.8692  | 1.4276  |
| CEU | SPDYE3 | 100506798 | 9.9709  | 7.8459  | 0.8005  |
| CEU | SPDYE3 | 100511798 | 9.7755  | 9.2104  | 0.1836  |
| CEU | SPDYE3 | 100516798 | 7.0148  | 7.8459  | -0.3131 |
| CEU | SPDYE3 | 100521798 | 8.992   | 10.7454 | -0.4935 |
| CEU | SPDYE3 | 100526798 | 9.6434  | 11.4277 | -0.4741 |
| CEU | SPDYE3 | 100531798 | 13.3537 | 12.1099 | 0.3129  |
| CEU | SPDYE3 | 100536798 | 13.5062 | 12.1099 | 0.3513  |
| CEU | SPDYE3 | 100541798 | 10.7579 | 10.2337 | 0.1544  |
| CEU | SPDYE3 | 100546798 | 22.8046 | 20.1264 | 0.415   |
| CEU | SPDYE3 | 100551798 | 23.9227 | 21.6614 | 0.3264  |
| CEU | SPDYE3 | 100556798 | 6.8365  | 7.1636  | -0.1339 |
| CEU | SPDYE3 | 100561798 | 0       | 0       | 0       |
| CEU | SPDYE3 | 100566798 | 0       | 0       | 0       |
| CEU | SPDYE3 | 100571798 | 0       | 0       | 0       |
| CEU | SPDYE3 | 100576798 | 0       | 0       | 0       |
| CEU | SPDYE3 | 100581798 | 0       | 0       | 0       |
| CEU | SPDYE3 | 100586798 | 0       | 0       | 0       |
| CEU | SPDYE3 | 100591798 | 0       | 0       | 0       |
| CEU | SPDYE3 | 100596798 | 0       | 0       | 0       |
| CEU | SPDYE3 | 100601798 | 0.8343  | 1.3645  | -0.8578 |
| CEU | SPDYE3 | 100606798 | 9.2635  | 10.7454 | -0.4171 |
| CEU | SPDYE3 | 100611798 | 18.2764 | 15.3506 | 0.5878  |
| CEU | SPDYE3 | 100616798 | 16.7095 | 11.5982 | 1.3392  |
| CEU | SPDYE3 | 100621798 | 10.8534 | 9.2104  | 0.5339  |
| CEU | SPDYE3 | 100626798 | 11.1649 | 8.8692  | 0.7725  |
| CEU | SPDYE3 | 100631798 | 16.8196 | 15.8623 | 0.1864  |
| CEU | SPDYE3 | 100636798 | 19.2865 | 17.3974 | 0.3367  |

## 2\_TajimasD\_data

|     |        |           |         |         |         |
|-----|--------|-----------|---------|---------|---------|
| CEU | SPDYE3 | 100641798 | 15.5434 | 10.916  | 1.2834  |
| CEU | SPDYE3 | 100646798 | 16.6916 | 11.0866 | 1.5321  |
| CEU | SPDYE3 | 100651798 | 13.3474 | 9.7221  | 1.1203  |
| CEU | SPDYE3 | 100656798 | 5.1218  | 4.6052  | 0.3137  |
| CEU | SPDYE3 | 100661798 | 6.2263  | 5.6286  | 0.304   |
| CEU | SPDYE3 | 100666798 | 5.3135  | 7.5047  | -0.8597 |
| CEU | SPDYE3 | 100671798 | 4.9553  | 8.3576  | -1.2094 |
| CEU | SPDYE3 | 100676798 | 9.4435  | 15.3506 | -1.1868 |
| CEU | SPDYE3 | 100681798 | 7.0485  | 15.1801 | -1.6512 |
| CEU | SPDYE3 | 100686798 | 2.1394  | 8.0164  | -2.1707 |
| CEU | SPDYE3 | 100691798 | 5.5034  | 7.8459  | -0.8825 |
| CEU | SPDYE3 | 100696798 | 9.786   | 9.8926  | -0.0324 |
| CEU | SPDYE3 | 100701798 | 12.1416 | 10.916  | 0.3399  |
| CEU | SPDYE3 | 100706798 | 14.9705 | 11.9394 | 0.7728  |
| CEU | SPDYE3 | 100711798 | 18.1752 | 14.6684 | 0.7357  |
| CEU | SPDYE3 | 100716798 | 16.5533 | 13.8156 | 0.608   |
| CEU | SPDYE3 | 100721798 | 13.4283 | 12.6216 | 0.1952  |
| CEU | SPDYE3 | 100726798 | 10.0848 | 10.916  | -0.2305 |
| CEU | SPDYE3 | 100731798 | 8.4764  | 11.2571 | -0.7493 |
| CEU | SPDYE3 | 100736798 | 9.3878  | 11.7688 | -0.6153 |
| CEU | SPDYE3 | 100741798 | 8.5164  | 9.8926  | -0.4185 |
| CEU | SPDYE3 | 100746798 | 8.8852  | 9.8926  | -0.3063 |
| CEU | SPDYE3 | 100751798 | 10.779  | 10.7454 | 0.0095  |
| CEU | SPDYE3 | 100756798 | 15.5428 | 12.9627 | 0.6087  |
| CEU | SPDYE3 | 100761798 | 15.8627 | 12.6216 | 0.7841  |
| CEU | SPDYE3 | 100766798 | 9.1554  | 9.2104  | -0.0179 |
| CEU | SPDYE3 | 100771798 | 11.3881 | 11.0866 | 0.0824  |
| CEU | SPDYE3 | 100776798 | 14.3971 | 11.7688 | 0.6792  |
| CEU | SPDYE3 | 100781798 | 11.5182 | 9.2104  | 0.7499  |
| CEU | SPDYE3 | 100786798 | 13.3624 | 10.0632 | 0.9873  |
| CEU | SPDYE3 | 100791798 | 13.7452 | 10.7454 | 0.8444  |
| CEU | SPDYE3 | 100796798 | 12.0398 | 10.2337 | 0.5321  |
| CEU | SPDYE3 | 100801798 | 14.409  | 10.5749 | 1.0955  |
| CEU | SPDYE3 | 100806798 | 10.4191 | 8.6987  | 0.5894  |
| CEU | SPDYE3 | 100811798 | 6.4512  | 7.1636  | -0.2916 |
| CEU | SPDYE3 | 100816798 | 11.0616 | 11.4277 | -0.0973 |
| CHB | SPDYE3 | 99811798  | 17.4622 | 12.3673 | 1.2529  |
| CHB | SPDYE3 | 99816798  | 17.0089 | 13.045  | 0.9269  |
| CHB | SPDYE3 | 99821798  | 10.9328 | 7.9625  | 1.1007  |
| CHB | SPDYE3 | 99826798  | 7.7803  | 6.6072  | 0.5152  |
| CHB | SPDYE3 | 99831798  | 3.2612  | 6.946   | -1.5467 |
| CHB | SPDYE3 | 99836798  | 2.0512  | 6.4378  | -1.9724 |
| CHB | SPDYE3 | 99841798  | 3.5435  | 7.7931  | -1.6061 |
| CHB | SPDYE3 | 99846798  | 4.1997  | 8.4708  | -1.4952 |
| CHB | SPDYE3 | 99851798  | 2.4472  | 5.5907  | -1.6039 |
| CHB | SPDYE3 | 99856798  | 0.7556  | 3.5577  | -2.1177 |
| CHB | SPDYE3 | 99861798  | 1.4513  | 5.4213  | -2.0817 |
| CHB | SPDYE3 | 99866798  | 1.8069  | 5.9295  | -1.9958 |
| CHB | SPDYE3 | 99871798  | 2.1022  | 5.9295  | -1.8529 |

## 2\_TajimasD\_data

|     |        |           |        |         |         |
|-----|--------|-----------|--------|---------|---------|
| CHB | SPDYE3 | 99876798  | 2.2576 | 6.946   | -1.968  |
| CHB | SPDYE3 | 99881798  | 1.9402 | 7.2848  | -2.1484 |
| CHB | SPDYE3 | 99886798  | 1.803  | 7.6237  | -2.2446 |
| CHB | SPDYE3 | 99891798  | 2.041  | 8.3013  | -2.2327 |
| CHB | SPDYE3 | 99896798  | 2.0721 | 6.7766  | -2.0195 |
| CHB | SPDYE3 | 99901798  | 1.6057 | 4.5742  | -1.8076 |
| CHB | SPDYE3 | 99906798  | 1.3227 | 3.5577  | -1.6891 |
| CHB | SPDYE3 | 99911798  | 1.4702 | 4.2354  | -1.8002 |
| CHB | SPDYE3 | 99916798  | 1.6263 | 5.7601  | -2.0538 |
| CHB | SPDYE3 | 99921798  | 1.5252 | 6.6072  | -2.2321 |
| CHB | SPDYE3 | 99926798  | 1.5195 | 5.9295  | -2.1349 |
| CHB | SPDYE3 | 99931798  | 2.8283 | 5.5907  | -1.4094 |
| CHB | SPDYE3 | 99936798  | 3.5524 | 8.1319  | -1.6645 |
| CHB | SPDYE3 | 99941798  | 2.1116 | 8.1319  | -2.1882 |
| CHB | SPDYE3 | 99946798  | 2.8978 | 10.5037 | -2.1806 |
| CHB | SPDYE3 | 99951798  | 2.8462 | 10.5037 | -2.1954 |
| CHB | SPDYE3 | 99956798  | 1.2414 | 6.4378  | -2.3365 |
| CHB | SPDYE3 | 99961798  | 1.3646 | 6.2684  | -2.2585 |
| CHB | SPDYE3 | 99966798  | 1.5599 | 5.9295  | -2.1154 |
| CHB | SPDYE3 | 99971798  | 2.5174 | 6.946   | -1.859  |
| CHB | SPDYE3 | 99976798  | 2.5273 | 6.4378  | -1.7583 |
| CHB | SPDYE3 | 99981798  | 1.9406 | 4.4048  | -1.5506 |
| CHB | SPDYE3 | 99986798  | 3.0969 | 5.0825  | -1.1024 |
| CHB | SPDYE3 | 99991798  | 2.1506 | 5.0825  | -1.6277 |
| CHB | SPDYE3 | 99996798  | 0.6097 | 4.913   | -2.4615 |
| CHB | SPDYE3 | 100001798 | 1.5663 | 6.0989  | -2.1396 |
| CHB | SPDYE3 | 100006798 | 2.0723 | 6.6072  | -1.9918 |
| CHB | SPDYE3 | 100011798 | 3.5186 | 7.2848  | -1.5139 |
| CHB | SPDYE3 | 100016798 | 2.953  | 7.1154  | -1.7094 |
| CHB | SPDYE3 | 100021798 | 1.1315 | 5.9295  | -2.3228 |
| CHB | SPDYE3 | 100026798 | 1.5176 | 6.2684  | -2.188  |
| CHB | SPDYE3 | 100031798 | 1.3206 | 6.4378  | -2.3009 |
| CHB | SPDYE3 | 100036798 | 1.4397 | 5.7601  | -2.1465 |
| CHB | SPDYE3 | 100041798 | 1.8393 | 6.6072  | -2.0941 |
| CHB | SPDYE3 | 100046798 | 1.5559 | 6.4378  | -2.1951 |
| CHB | SPDYE3 | 100051798 | 1.5445 | 5.5907  | -2.0645 |
| CHB | SPDYE3 | 100056798 | 1.2433 | 5.0825  | -2.1314 |
| CHB | SPDYE3 | 100061798 | 0.7763 | 3.7271  | -2.1437 |
| CHB | SPDYE3 | 100066798 | 2.2385 | 5.0825  | -1.5789 |
| CHB | SPDYE3 | 100071798 | 2.3668 | 7.4543  | -2.0026 |
| CHB | SPDYE3 | 100076798 | 2.719  | 7.9625  | -1.9431 |
| CHB | SPDYE3 | 100081798 | 2.1879 | 4.913   | -1.5587 |
| CHB | SPDYE3 | 100086798 | 2.1024 | 5.2519  | -1.6986 |
| CHB | SPDYE3 | 100091798 | 2.5368 | 7.4543  | -1.9357 |
| CHB | SPDYE3 | 100096798 | 1.7255 | 7.2848  | -2.2347 |
| CHB | SPDYE3 | 100101798 | 1.7927 | 5.9295  | -2.0027 |
| CHB | SPDYE3 | 100106798 | 1.6139 | 4.7436  | -1.8461 |
| CHB | SPDYE3 | 100111798 | 1.5675 | 4.5742  | -1.8308 |
| CHB | SPDYE3 | 100116798 | 1.8438 | 6.2684  | -2.0378 |

## 2\_TajimasD\_data

|     |        |           |        |         |         |
|-----|--------|-----------|--------|---------|---------|
| CHB | SPDYE3 | 100121798 | 2.5232 | 7.2848  | -1.914  |
| CHB | SPDYE3 | 100126798 | 1.5787 | 6.4378  | -2.1848 |
| CHB | SPDYE3 | 100131798 | 0.7491 | 5.7601  | -2.4896 |
| CHB | SPDYE3 | 100136798 | 1.6735 | 5.2519  | -1.9299 |
| CHB | SPDYE3 | 100141798 | 1.6353 | 5.2519  | -1.9505 |
| CHB | SPDYE3 | 100146798 | 1.1268 | 4.4048  | -2.0627 |
| CHB | SPDYE3 | 100151798 | 0.9541 | 3.8965  | -2.058  |
| CHB | SPDYE3 | 100156798 | 1.6969 | 4.4048  | -1.7039 |
| CHB | SPDYE3 | 100161798 | 2.5201 | 4.5742  | -1.2508 |
| CHB | SPDYE3 | 100166798 | 1.2979 | 3.7271  | -1.7648 |
| CHB | SPDYE3 | 100171798 | 1.2008 | 6.7766  | -2.3935 |
| CHB | SPDYE3 | 100176798 | 1.9623 | 9.6567  | -2.3859 |
| CHB | SPDYE3 | 100181798 | 1.5907 | 8.1319  | -2.3776 |
| CHB | SPDYE3 | 100186798 | 1.1605 | 5.5907  | -2.2604 |
| CHB | SPDYE3 | 100191798 | 0.9596 | 4.5742  | -2.201  |
| CHB | SPDYE3 | 100196798 | 2.0324 | 5.9295  | -1.8866 |
| CHB | SPDYE3 | 100201798 | 2.0025 | 5.5907  | -1.8308 |
| CHB | SPDYE3 | 100206798 | 1.8205 | 5.9295  | -1.9892 |
| CHB | SPDYE3 | 100211798 | 4.478  | 8.8096  | -1.4625 |
| CHB | SPDYE3 | 100216798 | 5.5675 | 9.8261  | -1.2993 |
| CHB | SPDYE3 | 100221798 | 6.031  | 9.4872  | -1.0895 |
| CHB | SPDYE3 | 100226798 | 5.4434 | 7.6237  | -0.8408 |
| CHB | SPDYE3 | 100231798 | 5.5465 | 6.6072  | -0.4659 |
| CHB | SPDYE3 | 100236798 | 5.6863 | 6.6072  | -0.4045 |
| CHB | SPDYE3 | 100241798 | 3.5612 | 6.0989  | -1.1979 |
| CHB | SPDYE3 | 100246798 | 2.5762 | 6.0989  | -1.6629 |
| CHB | SPDYE3 | 100251798 | 3.0135 | 5.7601  | -1.3646 |
| CHB | SPDYE3 | 100256798 | 3.1938 | 5.0825  | -1.0486 |
| CHB | SPDYE3 | 100261798 | 4.4167 | 5.7601  | -0.6674 |
| CHB | SPDYE3 | 100266798 | 3.9543 | 6.7766  | -1.2115 |
| CHB | SPDYE3 | 100271798 | 1.3786 | 5.0825  | -2.0563 |
| CHB | SPDYE3 | 100276798 | 2.2501 | 6.2684  | -1.8507 |
| CHB | SPDYE3 | 100281798 | 4.1744 | 8.979   | -1.5938 |
| CHB | SPDYE3 | 100286798 | 4.7493 | 7.9625  | -1.1907 |
| CHB | SPDYE3 | 100291798 | 3.3088 | 6.6072  | -1.4487 |
| CHB | SPDYE3 | 100296798 | 4.7419 | 8.1319  | -1.2322 |
| CHB | SPDYE3 | 100301798 | 4.8388 | 7.1154  | -0.9349 |
| CHB | SPDYE3 | 100306798 | 4.8022 | 6.4378  | -0.7354 |
| CHB | SPDYE3 | 100311798 | 7.1095 | 8.1319  | -0.3716 |
| CHB | SPDYE3 | 100316798 | 5.2258 | 7.7931  | -0.9703 |
| CHB | SPDYE3 | 100321798 | 2.2524 | 6.4378  | -1.8819 |
| CHB | SPDYE3 | 100326798 | 2.2795 | 6.2684  | -1.8371 |
| CHB | SPDYE3 | 100331798 | 3.2616 | 6.946   | -1.5466 |
| CHB | SPDYE3 | 100336798 | 2.6922 | 5.0825  | -1.327  |
| CHB | SPDYE3 | 100341798 | 3.6021 | 5.5907  | -1.0146 |
| CHB | SPDYE3 | 100346798 | 7.1161 | 9.4872  | -0.7474 |
| CHB | SPDYE3 | 100351798 | 6.9829 | 9.6567  | -0.8291 |
| CHB | SPDYE3 | 100356798 | 6.4759 | 8.1319  | -0.6019 |
| CHB | SPDYE3 | 100361798 | 9.9952 | 10.3343 | -0.0987 |

## 2\_TajimasD\_data

|     |        |           |         |         |         |
|-----|--------|-----------|---------|---------|---------|
| CHB | SPDYE3 | 100366798 | 12.9951 | 12.1979 | 0.1986  |
| CHB | SPDYE3 | 100371798 | 14.0006 | 13.3838 | 0.1408  |
| CHB | SPDYE3 | 100376798 | 12.7392 | 11.3508 | 0.3701  |
| CHB | SPDYE3 | 100381798 | 9.513   | 11.012  | -0.4112 |
| CHB | SPDYE3 | 100386798 | 6.6638  | 13.5532 | -1.5537 |
| CHB | SPDYE3 | 100391798 | 4.8867  | 11.3508 | -1.7233 |
| CHB | SPDYE3 | 100396798 | 5.4875  | 12.7061 | -1.7305 |
| CHB | SPDYE3 | 100401798 | 5.1091  | 12.0285 | -1.7468 |
| CHB | SPDYE3 | 100406798 | 5.2678  | 8.8096  | -1.1958 |
| CHB | SPDYE3 | 100411798 | 7.941   | 10.6731 | -0.7716 |
| CHB | SPDYE3 | 100416798 | 7.144   | 13.045  | -1.3799 |
| CHB | SPDYE3 | 100421798 | 5.6028  | 11.1814 | -1.5084 |
| CHB | SPDYE3 | 100426798 | 5.5692  | 8.3013  | -0.9744 |
| CHB | SPDYE3 | 100431798 | 6.9042  | 10.5037 | -1.032  |
| CHB | SPDYE3 | 100436798 | 6.8159  | 10.5037 | -1.0573 |
| CHB | SPDYE3 | 100441798 | 7.333   | 10.1649 | -0.8371 |
| CHB | SPDYE3 | 100446798 | 6.4193  | 9.4872  | -0.9671 |
| CHB | SPDYE3 | 100451798 | 4.8633  | 7.9625  | -1.1485 |
| CHB | SPDYE3 | 100456798 | 6.285   | 8.4708  | -0.7652 |
| CHB | SPDYE3 | 100461798 | 6.0474  | 8.4708  | -0.8484 |
| CHB | SPDYE3 | 100466798 | 6.8974  | 10.5037 | -1.0339 |
| CHB | SPDYE3 | 100471798 | 7.9996  | 11.6896 | -0.9569 |
| CHB | SPDYE3 | 100476798 | 5.1473  | 9.4872  | -1.368  |
| CHB | SPDYE3 | 100481798 | 4.9221  | 10.3343 | -1.5754 |
| CHB | SPDYE3 | 100486798 | 4.1671  | 10.1649 | -1.773  |
| CHB | SPDYE3 | 100491798 | 4.2787  | 8.1319  | -1.4005 |
| CHB | SPDYE3 | 100496798 | 10.5943 | 11.6896 | -0.284  |
| CHB | SPDYE3 | 100501798 | 8.9402  | 11.5202 | -0.6783 |
| CHB | SPDYE3 | 100506798 | 6.9406  | 9.3178  | -0.762  |
| CHB | SPDYE3 | 100511798 | 8.0689  | 11.6896 | -0.939  |
| CHB | SPDYE3 | 100516798 | 7.6583  | 11.012  | -0.9199 |
| CHB | SPDYE3 | 100521798 | 10.6111 | 12.8755 | -0.5361 |
| CHB | SPDYE3 | 100526798 | 10.6438 | 12.8755 | -0.5283 |
| CHB | SPDYE3 | 100531798 | 13.5483 | 11.5202 | 0.5332  |
| CHB | SPDYE3 | 100536798 | 12.016  | 13.2144 | -0.2768 |
| CHB | SPDYE3 | 100541798 | 6.4797  | 12.7061 | -1.4926 |
| CHB | SPDYE3 | 100546798 | 22.0938 | 22.024  | 0.0099  |
| CHB | SPDYE3 | 100551798 | 25.5866 | 24.3958 | 0.1528  |
| CHB | SPDYE3 | 100556798 | 6.8197  | 8.8096  | -0.6718 |
| CHB | SPDYE3 | 100561798 | 0       | 0       | 0       |
| CHB | SPDYE3 | 100566798 | 0       | 0       | 0       |
| CHB | SPDYE3 | 100571798 | 0       | 0       | 0       |
| CHB | SPDYE3 | 100576798 | 0       | 0       | 0       |
| CHB | SPDYE3 | 100581798 | 0       | 0       | 0       |
| CHB | SPDYE3 | 100586798 | 0       | 0       | 0       |
| CHB | SPDYE3 | 100591798 | 0       | 0       | 0       |
| CHB | SPDYE3 | 100596798 | 0       | 0       | 0       |
| CHB | SPDYE3 | 100601798 | 0.0484  | 0.6777  | -1.6452 |
| CHB | SPDYE3 | 100606798 | 7.9006  | 9.6567  | -0.5445 |



## 2\_TajimasD\_data

|     |        |           |         |         |         |
|-----|--------|-----------|---------|---------|---------|
| CHB | SPDYE3 | 100611798 | 17.9296 | 17.1109 | 0.1479  |
| CHB | SPDYE3 | 100616798 | 16.5587 | 13.5532 | 0.6778  |
| CHB | SPDYE3 | 100621798 | 10.5102 | 9.1484  | 0.444   |
| CHB | SPDYE3 | 100626798 | 9.9941  | 8.6402  | 0.4654  |
| CHB | SPDYE3 | 100631798 | 13.3368 | 16.2638 | -0.5549 |
| CHB | SPDYE3 | 100636798 | 17.5462 | 19.1439 | -0.2591 |
| CHB | SPDYE3 | 100641798 | 16.5587 | 11.5202 | 1.3247  |
| CHB | SPDYE3 | 100646798 | 16.0238 | 11.012  | 1.3747  |
| CHB | SPDYE3 | 100651798 | 12.024  | 11.8591 | 0.0422  |
| CHB | SPDYE3 | 100656798 | 4.6996  | 7.7931  | -1.1692 |
| CHB | SPDYE3 | 100661798 | 6.3065  | 8.979   | -0.8866 |
| CHB | SPDYE3 | 100666798 | 6.9336  | 9.9955  | -0.9194 |
| CHB | SPDYE3 | 100671798 | 7.9933  | 10.5037 | -0.7197 |
| CHB | SPDYE3 | 100676798 | 16.1201 | 21.8545 | -0.8183 |
| CHB | SPDYE3 | 100681798 | 12.8298 | 21.1769 | -1.228  |
| CHB | SPDYE3 | 100686798 | 3.4877  | 9.4872  | -1.8912 |
| CHB | SPDYE3 | 100691798 | 5.5121  | 9.3178  | -1.2199 |
| CHB | SPDYE3 | 100696798 | 8.9714  | 12.1979 | -0.8039 |
| CHB | SPDYE3 | 100701798 | 12.1902 | 13.7226 | -0.3415 |
| CHB | SPDYE3 | 100706798 | 14.4167 | 14.7391 | -0.0671 |
| CHB | SPDYE3 | 100711798 | 18.3536 | 17.6192 | 0.129   |
| CHB | SPDYE3 | 100716798 | 18.9017 | 16.6027 | 0.4273  |
| CHB | SPDYE3 | 100721798 | 15.1628 | 14.9085 | 0.0524  |
| CHB | SPDYE3 | 100726798 | 10.2895 | 13.2144 | -0.6756 |
| CHB | SPDYE3 | 100731798 | 7.9831  | 13.2144 | -1.2084 |
| CHB | SPDYE3 | 100736798 | 9.3988  | 14.0615 | -1.0154 |
| CHB | SPDYE3 | 100741798 | 9.3253  | 12.7061 | -0.8105 |
| CHB | SPDYE3 | 100746798 | 9.6737  | 11.8591 | -0.5591 |
| CHB | SPDYE3 | 100751798 | 10.8492 | 12.0285 | -0.2977 |
| CHB | SPDYE3 | 100756798 | 12.554  | 15.2474 | -0.5431 |
| CHB | SPDYE3 | 100761798 | 12.2846 | 15.4168 | -0.6249 |
| CHB | SPDYE3 | 100766798 | 8.8235  | 11.1814 | -0.6376 |
| CHB | SPDYE3 | 100771798 | 10.2239 | 12.8755 | -0.6277 |
| CHB | SPDYE3 | 100776798 | 12.3754 | 14.0615 | -0.3672 |
| CHB | SPDYE3 | 100781798 | 10.9313 | 9.8261  | 0.3372  |
| CHB | SPDYE3 | 100786798 | 12.0048 | 11.012  | 0.2723  |
| CHB | SPDYE3 | 100791798 | 12.4426 | 12.0285 | 0.1045  |
| CHB | SPDYE3 | 100796798 | 12.5576 | 10.5037 | 0.5888  |
| CHB | SPDYE3 | 100801798 | 15.5641 | 10.8426 | 1.314   |
| CHB | SPDYE3 | 100806798 | 11.2579 | 8.979   | 0.756   |
| CHB | SPDYE3 | 100811798 | 6.7847  | 7.2848  | -0.201  |
| CHB | SPDYE3 | 100816798 | 11.6488 | 9.6567  | 0.6177  |
| YRI | SPDYE3 | 99811798  | 17.5262 | 12.9408 | 1.0767  |
| YRI | SPDYE3 | 99816798  | 16.6047 | 15.6298 | 0.1913  |
| YRI | SPDYE3 | 99821798  | 11.0116 | 11.7644 | -0.1934 |
| YRI | SPDYE3 | 99826798  | 8.5678  | 11.5963 | -0.7886 |
| YRI | SPDYE3 | 99831798  | 6.3092  | 11.0921 | -1.2986 |
| YRI | SPDYE3 | 99836798  | 6.9398  | 9.5795  | -0.8218 |
| YRI | SPDYE3 | 99841798  | 9.0927  | 10.756  | -0.4648 |

## 2\_TajimasD\_data

|     |        |           |         |         |         |
|-----|--------|-----------|---------|---------|---------|
| YRI | SPDYE3 | 99846798  | 10.2743 | 10.4199 | -0.0419 |
| YRI | SPDYE3 | 99851798  | 6.2905  | 8.067   | -0.6483 |
| YRI | SPDYE3 | 99856798  | 3.2596  | 7.2267  | -1.6008 |
| YRI | SPDYE3 | 99861798  | 5.4328  | 7.0586  | -0.6702 |
| YRI | SPDYE3 | 99866798  | 5.3107  | 5.8822  | -0.2777 |
| YRI | SPDYE3 | 99871798  | 4.3133  | 7.2267  | -1.1756 |
| YRI | SPDYE3 | 99876798  | 5.1235  | 9.2434  | -1.3259 |
| YRI | SPDYE3 | 99881798  | 5.533   | 9.2434  | -1.1941 |
| YRI | SPDYE3 | 99886798  | 5.2123  | 8.5712  | -1.1592 |
| YRI | SPDYE3 | 99891798  | 5.9196  | 10.924  | -1.3783 |
| YRI | SPDYE3 | 99896798  | 5.5602  | 10.5879 | -1.4258 |
| YRI | SPDYE3 | 99901798  | 4.066   | 8.4031  | -1.5243 |
| YRI | SPDYE3 | 99906798  | 3.5342  | 7.0586  | -1.4529 |
| YRI | SPDYE3 | 99911798  | 2.5345  | 6.0502  | -1.6658 |
| YRI | SPDYE3 | 99916798  | 2.3352  | 7.5628  | -2.0238 |
| YRI | SPDYE3 | 99921798  | 4.3748  | 9.2434  | -1.5668 |
| YRI | SPDYE3 | 99926798  | 4.8107  | 10.0837 | -1.5651 |
| YRI | SPDYE3 | 99931798  | 4.0708  | 10.0837 | -1.7847 |
| YRI | SPDYE3 | 99936798  | 7.0899  | 11.4282 | -1.1453 |
| YRI | SPDYE3 | 99941798  | 5.8583  | 11.9324 | -1.5398 |
| YRI | SPDYE3 | 99946798  | 8.3849  | 13.613  | -1.1702 |
| YRI | SPDYE3 | 99951798  | 9.8153  | 12.6047 | -0.6715 |
| YRI | SPDYE3 | 99956798  | 5.0767  | 9.7476  | -1.4309 |
| YRI | SPDYE3 | 99961798  | 3.5832  | 9.2434  | -1.8216 |
| YRI | SPDYE3 | 99966798  | 3.9574  | 8.7392  | -1.6209 |
| YRI | SPDYE3 | 99971798  | 6.7482  | 10.2518 | -1.024  |
| YRI | SPDYE3 | 99976798  | 7.0228  | 10.2518 | -0.9438 |
| YRI | SPDYE3 | 99981798  | 4.9374  | 7.7309  | -1.0599 |
| YRI | SPDYE3 | 99986798  | 4.4634  | 7.7309  | -1.2398 |
| YRI | SPDYE3 | 99991798  | 5.0741  | 8.4031  | -1.17   |
| YRI | SPDYE3 | 99996798  | 4.4255  | 8.235   | -1.364  |
| YRI | SPDYE3 | 100001798 | 5.1406  | 8.7392  | -1.2198 |
| YRI | SPDYE3 | 100006798 | 5.2156  | 9.5795  | -1.3586 |
| YRI | SPDYE3 | 100011798 | 5.0588  | 8.7392  | -1.2476 |
| YRI | SPDYE3 | 100016798 | 5.7797  | 8.5712  | -0.9634 |
| YRI | SPDYE3 | 100021798 | 6.7612  | 10.0837 | -0.9862 |
| YRI | SPDYE3 | 100026798 | 7.0931  | 10.5879 | -0.9911 |
| YRI | SPDYE3 | 100031798 | 4.9232  | 8.5712  | -1.2589 |
| YRI | SPDYE3 | 100036798 | 4.2184  | 6.2183  | -0.9245 |
| YRI | SPDYE3 | 100041798 | 6.4905  | 6.5544  | -0.0282 |
| YRI | SPDYE3 | 100046798 | 5.9547  | 7.2267  | -0.5133 |
| YRI | SPDYE3 | 100051798 | 4.1041  | 7.5628  | -1.339  |
| YRI | SPDYE3 | 100056798 | 3.6539  | 8.7392  | -1.7238 |
| YRI | SPDYE3 | 100061798 | 2.8268  | 7.7309  | -1.8607 |
| YRI | SPDYE3 | 100066798 | 4.2543  | 6.2183  | -0.9079 |
| YRI | SPDYE3 | 100071798 | 5.6821  | 7.0586  | -0.5675 |
| YRI | SPDYE3 | 100076798 | 7.8422  | 9.5795  | -0.5409 |
| YRI | SPDYE3 | 100081798 | 5.9508  | 8.9073  | -0.9847 |
| YRI | SPDYE3 | 100086798 | 4.7246  | 7.3947  | -1.0551 |

## 2\_TajimasD\_data

|     |        |           |         |         |         |
|-----|--------|-----------|---------|---------|---------|
| YRI | SPDYE3 | 100091798 | 5.463   | 7.2267  | -0.7117 |
| YRI | SPDYE3 | 100096798 | 5.859   | 7.5628  | -0.6596 |
| YRI | SPDYE3 | 100101798 | 6.5243  | 10.2518 | -1.0894 |
| YRI | SPDYE3 | 100106798 | 6.7962  | 11.9324 | -1.302  |
| YRI | SPDYE3 | 100111798 | 6.3519  | 10.5879 | -1.2013 |
| YRI | SPDYE3 | 100116798 | 7.9295  | 12.1005 | -1.0435 |
| YRI | SPDYE3 | 100121798 | 8.7444  | 13.1089 | -1.0124 |
| YRI | SPDYE3 | 100126798 | 6.4902  | 12.2685 | -1.4269 |
| YRI | SPDYE3 | 100131798 | 5.8931  | 14.1172 | -1.7783 |
| YRI | SPDYE3 | 100136798 | 4.6304  | 12.1005 | -1.8689 |
| YRI | SPDYE3 | 100141798 | 4.3446  | 8.9073  | -1.5196 |
| YRI | SPDYE3 | 100146798 | 4.26    | 9.2434  | -1.6038 |
| YRI | SPDYE3 | 100151798 | 3.6233  | 9.4115  | -1.8319 |
| YRI | SPDYE3 | 100156798 | 3.6282  | 8.7392  | -1.7325 |
| YRI | SPDYE3 | 100161798 | 3.5885  | 9.0754  | -1.7961 |
| YRI | SPDYE3 | 100166798 | 3.2065  | 10.0837 | -2.0413 |
| YRI | SPDYE3 | 100171798 | 4.0188  | 10.5879 | -1.863  |
| YRI | SPDYE3 | 100176798 | 6.5015  | 13.613  | -1.5917 |
| YRI | SPDYE3 | 100181798 | 6.148   | 13.445  | -1.6526 |
| YRI | SPDYE3 | 100186798 | 2.9552  | 8.5712  | -1.9381 |
| YRI | SPDYE3 | 100191798 | 2.1019  | 7.2267  | -2.068  |
| YRI | SPDYE3 | 100196798 | 4.1841  | 8.067   | -1.4169 |
| YRI | SPDYE3 | 100201798 | 5.0666  | 7.8989  | -1.0537 |
| YRI | SPDYE3 | 100206798 | 3.2813  | 8.235   | -1.7737 |
| YRI | SPDYE3 | 100211798 | 4.5374  | 11.7644 | -1.8567 |
| YRI | SPDYE3 | 100216798 | 5.0312  | 12.4366 | -1.8054 |
| YRI | SPDYE3 | 100221798 | 3.9198  | 10.2518 | -1.8507 |
| YRI | SPDYE3 | 100226798 | 4.2472  | 9.7476  | -1.685  |
| YRI | SPDYE3 | 100231798 | 5.9762  | 11.5963 | -1.4635 |
| YRI | SPDYE3 | 100236798 | 6.5382  | 11.7644 | -1.3426 |
| YRI | SPDYE3 | 100241798 | 4.3359  | 9.9157  | -1.6823 |
| YRI | SPDYE3 | 100246798 | 3.3537  | 11.7644 | -2.1608 |
| YRI | SPDYE3 | 100251798 | 3.9984  | 11.7644 | -1.9951 |
| YRI | SPDYE3 | 100256798 | 4.7195  | 11.5963 | -1.7908 |
| YRI | SPDYE3 | 100261798 | 8.4136  | 14.9575 | -1.3393 |
| YRI | SPDYE3 | 100266798 | 7.9463  | 12.9408 | -1.1728 |
| YRI | SPDYE3 | 100271798 | 3.3943  | 9.4115  | -1.9044 |
| YRI | SPDYE3 | 100276798 | 5.0381  | 12.4366 | -1.8037 |
| YRI | SPDYE3 | 100281798 | 6.359   | 13.7811 | -1.642  |
| YRI | SPDYE3 | 100286798 | 5.0852  | 11.4282 | -1.6746 |
| YRI | SPDYE3 | 100291798 | 4.4271  | 11.0921 | -1.8096 |
| YRI | SPDYE3 | 100296798 | 7.9431  | 12.7727 | -1.1482 |
| YRI | SPDYE3 | 100301798 | 8.6112  | 12.9408 | -1.0167 |
| YRI | SPDYE3 | 100306798 | 8.1229  | 11.9324 | -0.9657 |
| YRI | SPDYE3 | 100311798 | 11.3051 | 13.7811 | -0.5478 |
| YRI | SPDYE3 | 100316798 | 9.2743  | 14.7895 | -1.1409 |
| YRI | SPDYE3 | 100321798 | 5.3026  | 12.2685 | -1.7202 |
| YRI | SPDYE3 | 100326798 | 6.6934  | 10.5879 | -1.1045 |
| YRI | SPDYE3 | 100331798 | 11.5351 | 13.445  | -0.4325 |

## 2\_TajimasD\_data

|     |        |           |         |         |         |
|-----|--------|-----------|---------|---------|---------|
| YRI | SPDYE3 | 100336798 | 9.8645  | 13.7811 | -0.8665 |
| YRI | SPDYE3 | 100341798 | 7.3724  | 14.7895 | -1.5344 |
| YRI | SPDYE3 | 100346798 | 9.4727  | 21.0078 | -1.7044 |
| YRI | SPDYE3 | 100351798 | 8.9376  | 21.0078 | -1.7835 |
| YRI | SPDYE3 | 100356798 | 8.8155  | 17.6465 | -1.5432 |
| YRI | SPDYE3 | 100361798 | 10.5738 | 15.7978 | -1.0148 |
| YRI | SPDYE3 | 100366798 | 13.1993 | 16.302  | -0.5849 |
| YRI | SPDYE3 | 100371798 | 16.4153 | 17.8146 | -0.2423 |
| YRI | SPDYE3 | 100376798 | 15.1358 | 14.6214 | 0.1076  |
| YRI | SPDYE3 | 100381798 | 16.3479 | 14.9575 | 0.2846  |
| YRI | SPDYE3 | 100386798 | 16.9036 | 19.4952 | -0.4115 |
| YRI | SPDYE3 | 100391798 | 12.9127 | 16.6382 | -0.6888 |
| YRI | SPDYE3 | 100396798 | 13.8769 | 15.4617 | -0.3143 |
| YRI | SPDYE3 | 100401798 | 11.8493 | 15.1256 | -0.6634 |
| YRI | SPDYE3 | 100406798 | 9.5664  | 13.613  | -0.9057 |
| YRI | SPDYE3 | 100411798 | 11.161  | 16.8062 | -1.0337 |
| YRI | SPDYE3 | 100416798 | 10.5942 | 16.9743 | -1.1572 |
| YRI | SPDYE3 | 100421798 | 8.7934  | 13.2769 | -1.0276 |
| YRI | SPDYE3 | 100426798 | 7.8737  | 11.5963 | -0.9694 |
| YRI | SPDYE3 | 100431798 | 9.6102  | 13.1089 | -0.8116 |
| YRI | SPDYE3 | 100436798 | 11.5076 | 13.9492 | -0.534  |
| YRI | SPDYE3 | 100441798 | 12.1671 | 13.613  | -0.3236 |
| YRI | SPDYE3 | 100446798 | 8.4611  | 13.2769 | -1.1037 |
| YRI | SPDYE3 | 100451798 | 6.2509  | 12.9408 | -1.5709 |
| YRI | SPDYE3 | 100456798 | 8.4468  | 12.4366 | -0.9727 |
| YRI | SPDYE3 | 100461798 | 8.9423  | 12.2685 | -0.8214 |
| YRI | SPDYE3 | 100466798 | 8.8506  | 14.4534 | -1.1847 |
| YRI | SPDYE3 | 100471798 | 7.8868  | 16.134  | -1.5702 |
| YRI | SPDYE3 | 100476798 | 5.715   | 12.9408 | -1.6967 |
| YRI | SPDYE3 | 100481798 | 7.6126  | 12.2685 | -1.1498 |
| YRI | SPDYE3 | 100486798 | 8.3104  | 11.2602 | -0.7897 |
| YRI | SPDYE3 | 100491798 | 7.4444  | 10.924  | -0.9583 |
| YRI | SPDYE3 | 100496798 | 15.9372 | 16.302  | -0.0688 |
| YRI | SPDYE3 | 100501798 | 15.0475 | 15.1256 | -0.0158 |
| YRI | SPDYE3 | 100506798 | 12.2847 | 13.9492 | -0.364  |
| YRI | SPDYE3 | 100511798 | 14.1684 | 15.9659 | -0.3457 |
| YRI | SPDYE3 | 100516798 | 12.305  | 15.1256 | -0.5711 |
| YRI | SPDYE3 | 100521798 | 14.748  | 17.6465 | -0.5065 |
| YRI | SPDYE3 | 100526798 | 12.5294 | 16.302  | -0.7112 |
| YRI | SPDYE3 | 100531798 | 13.3169 | 14.1172 | -0.173  |
| YRI | SPDYE3 | 100536798 | 13.4321 | 14.6214 | -0.2487 |
| YRI | SPDYE3 | 100541798 | 9.9639  | 14.6214 | -0.974  |
| YRI | SPDYE3 | 100546798 | 23.0081 | 25.3774 | -0.2916 |
| YRI | SPDYE3 | 100551798 | 29.9068 | 26.89   | 0.3509  |
| YRI | SPDYE3 | 100556798 | 12.0522 | 9.4115  | 0.8358  |
| YRI | SPDYE3 | 100561798 | 0       | 0       | 0       |
| YRI | SPDYE3 | 100566798 | 0       | 0       | 0       |
| YRI | SPDYE3 | 100571798 | 0       | 0       | 0       |
| YRI | SPDYE3 | 100576798 | 0       | 0       | 0       |

## 2\_TajimasD\_data

|     |         |           |         |         |         |
|-----|---------|-----------|---------|---------|---------|
| YRI | SPDYE3  | 100581798 | 0       | 0       | 0       |
| YRI | SPDYE3  | 100586798 | 0       | 0       | 0       |
| YRI | SPDYE3  | 100591798 | 0       | 0       | 0       |
| YRI | SPDYE3  | 100596798 | 0       | 0       | 0       |
| YRI | SPDYE3  | 100601798 | 0.4206  | 0.8403  | -0.948  |
| YRI | SPDYE3  | 100606798 | 10.0706 | 10.756  | -0.1915 |
| YRI | SPDYE3  | 100611798 | 20.1909 | 19.4952 | 0.1105  |
| YRI | SPDYE3  | 100616798 | 17.2544 | 16.8062 | 0.0821  |
| YRI | SPDYE3  | 100621798 | 10.7689 | 12.7727 | -0.4764 |
| YRI | SPDYE3  | 100626798 | 10.8924 | 11.4282 | -0.1415 |
| YRI | SPDYE3  | 100631798 | 17.3075 | 19.4952 | -0.3474 |
| YRI | SPDYE3  | 100636798 | 20.634  | 22.1842 | -0.2173 |
| YRI | SPDYE3  | 100641798 | 16.5448 | 14.6214 | 0.4022  |
| YRI | SPDYE3  | 100646798 | 16.8101 | 15.1256 | 0.3411  |
| YRI | SPDYE3  | 100651798 | 13.8002 | 14.7895 | -0.2047 |
| YRI | SPDYE3  | 100656798 | 7.0243  | 12.1005 | -1.27   |
| YRI | SPDYE3  | 100661798 | 9.356   | 15.1256 | -1.1683 |
| YRI | SPDYE3  | 100666798 | 9.2392  | 15.7978 | -1.2741 |
| YRI | SPDYE3  | 100671798 | 9.1854  | 15.6298 | -1.2648 |
| YRI | SPDYE3  | 100676798 | 17.8781 | 27.8983 | -1.1246 |
| YRI | SPDYE3  | 100681798 | 14.4127 | 27.058  | -1.4621 |
| YRI | SPDYE3  | 100686798 | 4.4871  | 13.7811 | -2.0561 |
| YRI | SPDYE3  | 100691798 | 6.3207  | 12.1005 | -1.446  |
| YRI | SPDYE3  | 100696798 | 10.4014 | 13.613  | -0.7188 |
| YRI | SPDYE3  | 100701798 | 14.0044 | 15.9659 | -0.3772 |
| YRI | SPDYE3  | 100706798 | 17.9297 | 17.1423 | 0.1415  |
| YRI | SPDYE3  | 100711798 | 22.733  | 19.1591 | 0.5771  |
| YRI | SPDYE3  | 100716798 | 21.8894 | 18.991  | 0.472   |
| YRI | SPDYE3  | 100721798 | 20.4246 | 17.9827 | 0.4191  |
| YRI | SPDYE3  | 100726798 | 15.2985 | 15.7978 | -0.097  |
| YRI | SPDYE3  | 100731798 | 13.2322 | 16.134  | -0.5525 |
| YRI | SPDYE3  | 100736798 | 15.8887 | 18.3188 | -0.4097 |
| YRI | SPDYE3  | 100741798 | 12.9442 | 16.4701 | -0.6582 |
| YRI | SPDYE3  | 100746798 | 12.3749 | 15.1256 | -0.557  |
| YRI | SPDYE3  | 100751798 | 13.5722 | 16.134  | -0.4878 |
| YRI | SPDYE3  | 100756798 | 17.0948 | 18.6549 | -0.2585 |
| YRI | SPDYE3  | 100761798 | 16.5552 | 18.6549 | -0.3479 |
| YRI | SPDYE3  | 100766798 | 11.1375 | 16.302  | -0.9736 |
| YRI | SPDYE3  | 100771798 | 14.6352 | 18.6549 | -0.6659 |
| YRI | SPDYE3  | 100776798 | 16.3118 | 17.9827 | -0.2867 |
| YRI | SPDYE3  | 100781798 | 12.9438 | 13.2769 | -0.0763 |
| YRI | SPDYE3  | 100786798 | 14.0573 | 14.7895 | -0.1515 |
| YRI | SPDYE3  | 100791798 | 14.0993 | 15.6298 | -0.3004 |
| YRI | SPDYE3  | 100796798 | 12.8995 | 13.445  | -0.1235 |
| YRI | SPDYE3  | 100801798 | 15.4077 | 12.7727 | 0.6264  |
| YRI | SPDYE3  | 100806798 | 12.0609 | 10.924  | 0.3131  |
| YRI | SPDYE3  | 100811798 | 6.4787  | 9.2434  | -0.8898 |
| YRI | SPDYE3  | 100816798 | 10.1012 | 12.6047 | -0.6027 |
| CEU | SULT1A3 | 29704255  | 3.0829  | 5.458   | -1.2416 |

## 2\_TajimasD\_data

|     |         |          |        |        |         |
|-----|---------|----------|--------|--------|---------|
| CEU | SULT1A3 | 29709255 | 4.1022 | 6.6519 | -1.1163 |
| CEU | SULT1A3 | 29714255 | 5.1008 | 6.4814 | -0.6188 |
| CEU | SULT1A3 | 29719255 | 4.6557 | 4.7757 | -0.0706 |
| CEU | SULT1A3 | 29724255 | 5.564  | 7.3342 | -0.7093 |
| CEU | SULT1A3 | 29729255 | 5.6044 | 9.5515 | -1.24   |
| CEU | SULT1A3 | 29734255 | 5.4352 | 6.9931 | -0.6519 |
| CEU | SULT1A3 | 29739255 | 5.6844 | 6.3108 | -0.2876 |
| CEU | SULT1A3 | 29744255 | 6.5749 | 7.8459 | -0.4788 |
| CEU | SULT1A3 | 29749255 | 7.6015 | 8.0164 | -0.1532 |
| CEU | SULT1A3 | 29754255 | 5.1763 | 7.5047 | -0.9136 |
| CEU | SULT1A3 | 29759255 | 3.0631 | 7.8459 | -1.8017 |
| CEU | SULT1A3 | 29764255 | 4.8357 | 8.0164 | -1.1748 |
| CEU | SULT1A3 | 29769255 | 3.4108 | 6.8225 | -1.4599 |
| CEU | SULT1A3 | 29774255 | 1.0388 | 6.8225 | -2.4748 |
| CEU | SULT1A3 | 29779255 | 1.2812 | 6.3108 | -2.3092 |
| CEU | SULT1A3 | 29784255 | 2.3459 | 5.2874 | -1.5817 |
| CEU | SULT1A3 | 29789255 | 2.0144 | 6.4814 | -2.0022 |
| CEU | SULT1A3 | 29794255 | 1.6685 | 6.3108 | -2.1314 |
| CEU | SULT1A3 | 29799255 | 1.4339 | 4.7757 | -1.9654 |
| CEU | SULT1A3 | 29804255 | 0.6931 | 4.9463 | -2.4256 |
| CEU | SULT1A3 | 29809255 | 0.8392 | 3.7524 | -2.1106 |
| CEU | SULT1A3 | 29814255 | 0.4444 | 3.0701 | -2.2523 |
| CEU | SULT1A3 | 29819255 | 0.8439 | 5.9697 | -2.4738 |
| CEU | SULT1A3 | 29824255 | 2.4257 | 7.3342 | -1.9667 |
| CEU | SULT1A3 | 29829255 | 3.9368 | 7.3342 | -1.3612 |
| CEU | SULT1A3 | 29834255 | 3.8595 | 6.9931 | -1.3112 |
| CEU | SULT1A3 | 29839255 | 4.2845 | 4.9463 | -0.3774 |
| CEU | SULT1A3 | 29844255 | 4.6778 | 4.7757 | -0.0576 |
| CEU | SULT1A3 | 29849255 | 2.8124 | 4.4346 | -1.0178 |
| CEU | SULT1A3 | 29854255 | 1.764  | 4.6052 | -1.725  |
| CEU | SULT1A3 | 29859255 | 3.1973 | 5.458  | -1.1818 |
| CEU | SULT1A3 | 29864255 | 4.1262 | 5.1169 | -0.5484 |
| CEU | SULT1A3 | 29869255 | 2.7594 | 3.9229 | -0.8115 |
| CEU | SULT1A3 | 29874255 | 3.7151 | 4.6052 | -0.5404 |
| CEU | SULT1A3 | 29879255 | 4.9936 | 5.458  | -0.2428 |
| CEU | SULT1A3 | 29884255 | 3.9439 | 5.1169 | -0.6493 |
| CEU | SULT1A3 | 29889255 | 3.0841 | 5.458  | -1.241  |
| CEU | SULT1A3 | 29894255 | 3.5325 | 6.3108 | -1.2756 |
| CEU | SULT1A3 | 29899255 | 4.1711 | 6.6519 | -1.0861 |
| CEU | SULT1A3 | 29904255 | 5.0221 | 5.7991 | -0.3848 |
| CEU | SULT1A3 | 29909255 | 7.9582 | 5.458  | 1.307   |
| CEU | SULT1A3 | 29914255 | 6.0377 | 4.4346 | 1.0058  |
| CEU | SULT1A3 | 29919255 | 4.1128 | 4.9463 | -0.4753 |
| CEU | SULT1A3 | 29924255 | 6.0111 | 6.4814 | -0.2108 |
| CEU | SULT1A3 | 29929255 | 6.6648 | 6.4814 | 0.0822  |
| CEU | SULT1A3 | 29934255 | 8.2738 | 6.4814 | 0.8034  |
| CEU | SULT1A3 | 29939255 | 7.5696 | 6.4814 | 0.4877  |
| CEU | SULT1A3 | 29944255 | 6.5306 | 5.7991 | 0.3623  |
| CEU | SULT1A3 | 29949255 | 4.7508 | 4.7757 | -0.0146 |

## 2\_TajimasD\_data

|     |         |          |        |        |         |
|-----|---------|----------|--------|--------|---------|
| CEU | SULT1A3 | 29954255 | 3.4451 | 4.2641 | -0.5316 |
| CEU | SULT1A3 | 29959255 | 4.6697 | 4.9463 | -0.1577 |
| CEU | SULT1A3 | 29964255 | 5.1052 | 4.7757 | 0.1938  |
| CEU | SULT1A3 | 29969255 | 7.1552 | 4.6052 | 1.5482  |
| CEU | SULT1A3 | 29974255 | 8.3741 | 5.2874 | 1.6597  |
| CEU | SULT1A3 | 29979255 | 7.4088 | 5.1169 | 1.2686  |
| CEU | SULT1A3 | 29984255 | 6.409  | 5.458  | 0.4972  |
| CEU | SULT1A3 | 29989255 | 4.5861 | 3.9229 | 0.4626  |
| CEU | SULT1A3 | 29994255 | 4.9235 | 4.0935 | 0.5581  |
| CEU | SULT1A3 | 29999255 | 5.7139 | 5.458  | 0.1338  |
| CEU | SULT1A3 | 30004255 | 3.2296 | 5.1169 | -1.0447 |
| CEU | SULT1A3 | 30009255 | 4.8672 | 6.8225 | -0.8367 |
| CEU | SULT1A3 | 30014255 | 8.8343 | 8.3576 | 0.1695  |
| CEU | SULT1A3 | 30019255 | 8.2084 | 7.3342 | 0.3503  |
| CEU | SULT1A3 | 30024255 | 6.8582 | 4.7757 | 1.2248  |
| CEU | SULT1A3 | 30029255 | 8.1282 | 5.7991 | 1.1536  |
| CEU | SULT1A3 | 30034255 | 7.625  | 7.5047 | 0.0472  |
| CEU | SULT1A3 | 30039255 | 6.1841 | 5.6286 | 0.2826  |
| CEU | SULT1A3 | 30044255 | 8.4084 | 5.6286 | 1.414   |
| CEU | SULT1A3 | 30049255 | 8.6461 | 6.3108 | 1.0722  |
| CEU | SULT1A3 | 30054255 | 6.5951 | 5.2874 | 0.7032  |
| CEU | SULT1A3 | 30059255 | 6.9368 | 5.7991 | 0.5635  |
| CEU | SULT1A3 | 30064255 | 5.9185 | 6.1402 | -0.1043 |
| CEU | SULT1A3 | 30069255 | 2.9664 | 5.2874 | -1.248  |
| CEU | SULT1A3 | 30074255 | 1.6755 | 3.7524 | -1.5047 |
| CEU | SULT1A3 | 30079255 | 2.8804 | 3.9229 | -0.7271 |
| CEU | SULT1A3 | 30084255 | 2.4146 | 5.1169 | -1.4958 |
| CEU | SULT1A3 | 30089255 | 3.4797 | 5.458  | -1.0342 |
| CEU | SULT1A3 | 30094255 | 5.6625 | 6.6519 | -0.4332 |
| CEU | SULT1A3 | 30099255 | 4.4739 | 7.1636 | -1.101  |
| CEU | SULT1A3 | 30104255 | 3.2127 | 5.6286 | -1.2289 |
| CEU | SULT1A3 | 30109255 | 2.7906 | 4.9463 | -1.2294 |
| CEU | SULT1A3 | 30114255 | 3.3997 | 5.7991 | -1.1884 |
| CEU | SULT1A3 | 30119255 | 6.1398 | 7.5047 | -0.5355 |
| CEU | SULT1A3 | 30124255 | 5.9806 | 6.4814 | -0.2245 |
| CEU | SULT1A3 | 30129255 | 3.1765 | 4.0935 | -0.6166 |
| CEU | SULT1A3 | 30134255 | 4.2113 | 5.6286 | -0.7209 |
| CEU | SULT1A3 | 30139255 | 6.1979 | 7.1636 | -0.3953 |
| CEU | SULT1A3 | 30144255 | 5.2839 | 6.3108 | -0.4715 |
| CEU | SULT1A3 | 30149255 | 3.0085 | 4.6052 | -0.9694 |
| CEU | SULT1A3 | 30154255 | 6.9812 | 6.9931 | -0.005  |
| CEU | SULT1A3 | 30159255 | 10.471 | 8.8692 | 0.539   |
| CEU | SULT1A3 | 30164255 | 9.7627 | 7.6753 | 0.8023  |
| CEU | SULT1A3 | 30169255 | 8.6774 | 6.8225 | 0.7937  |
| CEU | SULT1A3 | 30174255 | 6.5028 | 5.7991 | 0.3485  |
| CEU | SULT1A3 | 30179255 | 5.8646 | 5.7991 | 0.0324  |
| CEU | SULT1A3 | 30184255 | 5.5465 | 5.2874 | 0.1393  |
| CEU | SULT1A3 | 30189255 | 3.4436 | 5.2874 | -0.9914 |
| CEU | SULT1A3 | 30194255 | 2.592  | 6.1402 | -1.6697 |

## 2\_TajimasD\_data

|     |         |          |        |        |         |
|-----|---------|----------|--------|--------|---------|
| CEU | SULT1A3 | 30199255 | 2.3558 | 3.9229 | -1.093  |
| CEU | SULT1A3 | 30204255 | 0.6069 | 1.0234 | -0.8276 |
| CEU | SULT1A3 | 30209255 | 0.1655 | 0.8528 | -1.5478 |
| CEU | SULT1A3 | 30214255 | 0.1453 | 0.5117 | -1.1491 |
| CEU | SULT1A3 | 30219255 | 0      | 0      | 0       |
| CEU | SULT1A3 | 30224255 | 0.5038 | 0.6822 | -0.4659 |
| CEU | SULT1A3 | 30229255 | 0.5038 | 0.6822 | -0.4659 |
| CEU | SULT1A3 | 30234255 | 0.0202 | 0.1706 | -0.8934 |
| CEU | SULT1A3 | 30239255 | 0.0202 | 0.1706 | -0.8934 |
| CEU | SULT1A3 | 30244255 | 0      | 0      | 0       |
| CEU | SULT1A3 | 30249255 | 0      | 0      | 0       |
| CEU | SULT1A3 | 30254255 | 0      | 0      | 0       |
| CEU | SULT1A3 | 30259255 | 0      | 0      | 0       |
| CEU | SULT1A3 | 30264255 | 0.0701 | 0.6822 | -1.5984 |
| CEU | SULT1A3 | 30269255 | 0.0903 | 1.0234 | -1.8541 |
| CEU | SULT1A3 | 30274255 | 0.0202 | 0.3411 | -1.2864 |
| CEU | SULT1A3 | 30279255 | 0      | 0      | 0       |
| CEU | SULT1A3 | 30284255 | 0.6151 | 0.5117 | 0.3243  |
| CEU | SULT1A3 | 30289255 | 1.6083 | 1.3645 | 0.3944  |
| CEU | SULT1A3 | 30294255 | 1.5731 | 1.5351 | 0.0563  |
| CEU | SULT1A3 | 30299255 | 0.5799 | 0.8528 | -0.6146 |
| CEU | SULT1A3 | 30304255 | 1.0594 | 0.8528 | 0.4653  |
| CEU | SULT1A3 | 30309255 | 1.0796 | 1.0234 | 0.1117  |
| CEU | SULT1A3 | 30314255 | 0.5298 | 0.8528 | -0.7274 |
| CEU | SULT1A3 | 30319255 | 3.236  | 2.5584 | 0.675   |
| CEU | SULT1A3 | 30324255 | 5.384  | 4.0935 | 0.8678  |
| CEU | SULT1A3 | 30329255 | 4.9066 | 4.4346 | 0.2961  |
| CEU | SULT1A3 | 30334255 | 6.6951 | 6.4814 | 0.0958  |
| CEU | SULT1A3 | 30339255 | 6.9965 | 6.8225 | 0.0745  |
| CEU | SULT1A3 | 30344255 | 5.1538 | 5.9697 | -0.3938 |
| CEU | SULT1A3 | 30349255 | 5.4657 | 6.9931 | -0.6391 |
| CEU | SULT1A3 | 30354255 | 4.0781 | 6.1402 | -0.9704 |
| CEU | SULT1A3 | 30359255 | 4.5939 | 5.458  | -0.4517 |
| CEU | SULT1A3 | 30364255 | 4.4475 | 5.6286 | -0.6008 |
| CEU | SULT1A3 | 30369255 | 2.4236 | 4.0935 | -1.1229 |
| CEU | SULT1A3 | 30374255 | 3.234  | 4.9463 | -0.9765 |
| CEU | SULT1A3 | 30379255 | 3.5556 | 6.6519 | -1.3556 |
| CEU | SULT1A3 | 30384255 | 3.5234 | 5.6286 | -1.0708 |
| CEU | SULT1A3 | 30389255 | 4.7444 | 4.9463 | -0.1151 |
| CEU | SULT1A3 | 30394255 | 6.148  | 6.6519 | -0.2206 |
| CEU | SULT1A3 | 30399255 | 4.771  | 7.5047 | -1.0726 |
| CEU | SULT1A3 | 30404255 | 4.4595 | 6.9931 | -1.0601 |
| CEU | SULT1A3 | 30409255 | 3.9206 | 4.9463 | -0.585  |
| CEU | SULT1A3 | 30414255 | 2.73   | 3.0701 | -0.2917 |
| CEU | SULT1A3 | 30419255 | 3.5545 | 3.0701 | 0.4155  |
| CEU | SULT1A3 | 30424255 | 2.618  | 2.2173 | 0.4477  |
| CEU | SULT1A3 | 30429255 | 4.6335 | 3.9229 | 0.4956  |
| CEU | SULT1A3 | 30434255 | 5.3329 | 4.9463 | 0.2205  |
| CEU | SULT1A3 | 30439255 | 3.3653 | 4.4346 | -0.6709 |



## 2\_TajimasD\_data

|     |         |          |         |        |         |
|-----|---------|----------|---------|--------|---------|
| CEU | SULT1A3 | 30444255 | 3.3381  | 4.9463 | -0.9172 |
| CEU | SULT1A3 | 30449255 | 3.5114  | 5.2874 | -0.955  |
| CEU | SULT1A3 | 30454255 | 5.075   | 6.8225 | -0.7478 |
| CEU | SULT1A3 | 30459255 | 5.3074  | 6.6519 | -0.5886 |
| CEU | SULT1A3 | 30464255 | 4.6529  | 4.6052 | 0.029   |
| CEU | SULT1A3 | 30469255 | 6.8718  | 6.1402 | 0.3443  |
| CEU | SULT1A3 | 30474255 | 6.0686  | 7.6753 | -0.6176 |
| CEU | SULT1A3 | 30479255 | 4.1045  | 6.1402 | -0.9579 |
| CEU | SULT1A3 | 30484255 | 4.3845  | 4.9463 | -0.3204 |
| CEU | SULT1A3 | 30489255 | 6.2117  | 5.1169 | 0.606   |
| CEU | SULT1A3 | 30494255 | 7.8854  | 5.6286 | 1.1479  |
| CEU | SULT1A3 | 30499255 | 7.0804  | 5.6286 | 0.7385  |
| CEU | SULT1A3 | 30504255 | 7.8623  | 6.4814 | 0.6189  |
| CEU | SULT1A3 | 30509255 | 10.1464 | 7.6753 | 0.9498  |
| CEU | SULT1A3 | 30514255 | 11.0313 | 8.6987 | 0.7991  |
| CEU | SULT1A3 | 30519255 | 7.9358  | 7.1636 | 0.3161  |
| CEU | SULT1A3 | 30524255 | 4.4268  | 4.9463 | -0.2963 |
| CEU | SULT1A3 | 30529255 | 2.411   | 4.9463 | -1.4459 |
| CEU | SULT1A3 | 30534255 | 3.5411  | 4.7757 | -0.7261 |
| CEU | SULT1A3 | 30539255 | 2.9023  | 2.729  | 0.1638  |
| CEU | SULT1A3 | 30544255 | 1.7675  | 3.5818 | -1.3674 |
| CEU | SULT1A3 | 30549255 | 4.1909  | 5.9697 | -0.8585 |
| CEU | SULT1A3 | 30554255 | 5.0373  | 7.1636 | -0.8704 |
| CEU | SULT1A3 | 30559255 | 3.3626  | 6.4814 | -1.3979 |
| CEU | SULT1A3 | 30564255 | 1.3175  | 5.1169 | -2.103  |
| CEU | SULT1A3 | 30569255 | 1.7174  | 6.3108 | -2.1089 |
| CEU | SULT1A3 | 30574255 | 1.7675  | 5.2874 | -1.8927 |
| CEU | SULT1A3 | 30579255 | 1.4053  | 3.0701 | -1.428  |
| CEU | SULT1A3 | 30584255 | 1.945   | 3.0701 | -0.9651 |
| CEU | SULT1A3 | 30589255 | 3.282   | 4.4346 | -0.7232 |
| CEU | SULT1A3 | 30594255 | 2.725   | 5.1169 | -1.324  |
| CEU | SULT1A3 | 30599255 | 1.5731  | 4.0935 | -1.6948 |
| CEU | SULT1A3 | 30604255 | 1.7669  | 3.4112 | -1.2915 |
| CEU | SULT1A3 | 30609255 | 2.3076  | 3.9229 | -1.1266 |
| CEU | SULT1A3 | 30614255 | 2.3735  | 3.2407 | -0.7111 |
| CEU | SULT1A3 | 30619255 | 2.0569  | 2.8996 | -0.7579 |
| CEU | SULT1A3 | 30624255 | 1.9423  | 3.0701 | -0.9674 |
| CEU | SULT1A3 | 30629255 | 1.5112  | 3.0701 | -1.3372 |
| CEU | SULT1A3 | 30634255 | 4.7147  | 4.7757 | -0.0359 |
| CEU | SULT1A3 | 30639255 | 7.5908  | 5.6286 | 0.9981  |
| CEU | SULT1A3 | 30644255 | 10.7774 | 6.9931 | 1.5834  |
| CEU | SULT1A3 | 30649255 | 10.1107 | 7.1636 | 1.2064  |
| CEU | SULT1A3 | 30654255 | 3.8765  | 3.7524 | 0.0899  |
| CEU | SULT1A3 | 30659255 | 1.3859  | 1.7056 | -0.4379 |
| CEU | SULT1A3 | 30664255 | 1.6182  | 2.729  | -1.0499 |
| CEU | SULT1A3 | 30669255 | 2.2861  | 3.7524 | -1.0623 |
| CEU | SULT1A3 | 30674255 | 1.302   | 2.8996 | -1.4368 |
| CEU | SULT1A3 | 30679255 | 0.753   | 3.7524 | -2.173  |
| CEU | SULT1A3 | 30684255 | 2.2241  | 4.7757 | -1.5007 |

## 2\_TajimasD\_data

|     |         |          |        |         |         |
|-----|---------|----------|--------|---------|---------|
| CEU | SULT1A3 | 30689255 | 2.6432 | 5.1169  | -1.3692 |
| CEU | SULT1A3 | 30694255 | 2.2717 | 5.1169  | -1.5749 |
| CEU | SULT1A3 | 30699255 | 2.0462 | 3.5818  | -1.1574 |
| CHB | SULT1A3 | 29704255 | 1.2678 | 4.913   | -2.085  |
| CHB | SULT1A3 | 29709255 | 2.0265 | 6.2684  | -1.9537 |
| CHB | SULT1A3 | 29714255 | 3.2393 | 8.8096  | -1.8807 |
| CHB | SULT1A3 | 29719255 | 3.2418 | 9.3178  | -1.9476 |
| CHB | SULT1A3 | 29724255 | 3.4483 | 8.3013  | -1.7308 |
| CHB | SULT1A3 | 29729255 | 3.3503 | 10.3343 | -2.0329 |
| CHB | SULT1A3 | 29734255 | 2.687  | 10.3343 | -2.226  |
| CHB | SULT1A3 | 29739255 | 2.7752 | 6.946   | -1.7507 |
| CHB | SULT1A3 | 29744255 | 4.2494 | 7.7931  | -1.3393 |
| CHB | SULT1A3 | 29749255 | 5.9998 | 11.3508 | -1.4266 |
| CHB | SULT1A3 | 29754255 | 4.4851 | 10.6731 | -1.7477 |
| CHB | SULT1A3 | 29759255 | 2.4375 | 7.6237  | -1.9999 |
| CHB | SULT1A3 | 29764255 | 4.5603 | 9.4872  | -1.5531 |
| CHB | SULT1A3 | 29769255 | 4.4573 | 11.5202 | -1.8569 |
| CHB | SULT1A3 | 29774255 | 2.3901 | 9.9955  | -2.2838 |
| CHB | SULT1A3 | 29779255 | 1.9166 | 8.6402  | -2.3111 |
| CHB | SULT1A3 | 29784255 | 2.7156 | 6.6072  | -1.7092 |
| CHB | SULT1A3 | 29789255 | 3.7287 | 7.6237  | -1.502  |
| CHB | SULT1A3 | 29794255 | 3.0358 | 9.3178  | -2.0136 |
| CHB | SULT1A3 | 29799255 | 1.889  | 7.9625  | -2.2507 |
| CHB | SULT1A3 | 29804255 | 1.0567 | 5.7601  | -2.3368 |
| CHB | SULT1A3 | 29809255 | 0.8696 | 3.5577  | -2.0315 |
| CHB | SULT1A3 | 29814255 | 1.0543 | 5.0825  | -2.2364 |
| CHB | SULT1A3 | 29819255 | 1.1361 | 6.7766  | -2.4213 |
| CHB | SULT1A3 | 29824255 | 1.7672 | 7.4543  | -2.2386 |
| CHB | SULT1A3 | 29829255 | 3.1605 | 7.9625  | -1.7795 |
| CHB | SULT1A3 | 29834255 | 2.9121 | 6.2684  | -1.5458 |
| CHB | SULT1A3 | 29839255 | 2.3569 | 5.7601  | -1.6908 |
| CHB | SULT1A3 | 29844255 | 2.5052 | 6.4378  | -1.7682 |
| CHB | SULT1A3 | 29849255 | 1.6486 | 5.0825  | -1.9064 |
| CHB | SULT1A3 | 29854255 | 1.0982 | 4.913   | -2.1821 |
| CHB | SULT1A3 | 29859255 | 2.0655 | 7.7931  | -2.1647 |
| CHB | SULT1A3 | 29864255 | 3.0141 | 8.3013  | -1.8857 |
| CHB | SULT1A3 | 29869255 | 1.8247 | 5.2519  | -1.8484 |
| CHB | SULT1A3 | 29874255 | 2.0531 | 6.2684  | -1.9414 |
| CHB | SULT1A3 | 29879255 | 2.7341 | 6.7766  | -1.7353 |
| CHB | SULT1A3 | 29884255 | 4.1626 | 5.2519  | -0.5875 |
| CHB | SULT1A3 | 29889255 | 5.9933 | 5.7601  | 0.1159  |
| CHB | SULT1A3 | 29894255 | 6.3617 | 6.2684  | 0.043   |
| CHB | SULT1A3 | 29899255 | 7.4997 | 6.0989  | 0.6612  |
| CHB | SULT1A3 | 29904255 | 7.5014 | 5.9295  | 0.761   |
| CHB | SULT1A3 | 29909255 | 8.6905 | 7.2848  | 0.565   |
| CHB | SULT1A3 | 29914255 | 6.1713 | 5.2519  | 0.4959  |
| CHB | SULT1A3 | 29919255 | 4.3613 | 5.4213  | -0.5558 |
| CHB | SULT1A3 | 29924255 | 5.9823 | 7.2848  | -0.5236 |
| CHB | SULT1A3 | 29929255 | 6.0396 | 6.2684  | -0.1054 |

## 2\_TajimasD\_data

|     |         |          |        |        |         |
|-----|---------|----------|--------|--------|---------|
| CHB | SULT1A3 | 29934255 | 7.6712 | 7.4543 | 0.0854  |
| CHB | SULT1A3 | 29939255 | 7.1525 | 6.946  | 0.0867  |
| CHB | SULT1A3 | 29944255 | 6.3811 | 5.7601 | 0.3085  |
| CHB | SULT1A3 | 29949255 | 4.3438 | 6.0989 | -0.8285 |
| CHB | SULT1A3 | 29954255 | 2.5551 | 6.0989 | -1.6728 |
| CHB | SULT1A3 | 29959255 | 4.2429 | 6.0989 | -0.8761 |
| CHB | SULT1A3 | 29964255 | 5.0274 | 5.0825 | -0.0306 |
| CHB | SULT1A3 | 29969255 | 6.4146 | 5.0825 | 0.7396  |
| CHB | SULT1A3 | 29974255 | 8.1127 | 6.2684 | 0.8494  |
| CHB | SULT1A3 | 29979255 | 7.7421 | 5.7601 | 0.9847  |
| CHB | SULT1A3 | 29984255 | 6.0392 | 4.5742 | 0.8921  |
| CHB | SULT1A3 | 29989255 | 3.6958 | 4.4048 | -0.4461 |
| CHB | SULT1A3 | 29994255 | 4.2739 | 5.5907 | -0.6719 |
| CHB | SULT1A3 | 29999255 | 5.1156 | 5.5907 | -0.2424 |
| CHB | SULT1A3 | 30004255 | 2.9195 | 4.7436 | -1.076  |
| CHB | SULT1A3 | 30009255 | 3.7609 | 6.4378 | -1.2036 |
| CHB | SULT1A3 | 30014255 | 6.6752 | 8.6402 | -0.6754 |
| CHB | SULT1A3 | 30019255 | 6.802  | 8.1319 | -0.4834 |
| CHB | SULT1A3 | 30024255 | 6.134  | 5.9295 | 0.099   |
| CHB | SULT1A3 | 30029255 | 6.4696 | 5.0825 | 0.7701  |
| CHB | SULT1A3 | 30034255 | 6.1291 | 5.9295 | 0.0966  |
| CHB | SULT1A3 | 30039255 | 6.6737 | 6.4378 | 0.1061  |
| CHB | SULT1A3 | 30044255 | 8.4455 | 7.2848 | 0.4666  |
| CHB | SULT1A3 | 30049255 | 7.6073 | 7.2848 | 0.1296  |
| CHB | SULT1A3 | 30054255 | 5.503  | 6.946  | -0.6057 |
| CHB | SULT1A3 | 30059255 | 4.9358 | 6.7766 | -0.7902 |
| CHB | SULT1A3 | 30064255 | 5.1109 | 6.946  | -0.7703 |
| CHB | SULT1A3 | 30069255 | 3.6676 | 7.1154 | -1.4159 |
| CHB | SULT1A3 | 30074255 | 2.4847 | 5.9295 | -1.6677 |
| CHB | SULT1A3 | 30079255 | 3.5005 | 7.9625 | -1.6535 |
| CHB | SULT1A3 | 30084255 | 2.2347 | 6.6072 | -1.9205 |
| CHB | SULT1A3 | 30089255 | 3.1121 | 6.0989 | -1.4099 |
| CHB | SULT1A3 | 30094255 | 5.5403 | 8.3013 | -0.9847 |
| CHB | SULT1A3 | 30099255 | 4.8268 | 6.2684 | -0.6639 |
| CHB | SULT1A3 | 30104255 | 3.2747 | 4.2354 | -0.6254 |
| CHB | SULT1A3 | 30109255 | 2.7721 | 5.4213 | -1.3892 |
| CHB | SULT1A3 | 30114255 | 2.9989 | 6.6072 | -1.5848 |
| CHB | SULT1A3 | 30119255 | 4.7381 | 7.7931 | -1.1546 |
| CHB | SULT1A3 | 30124255 | 4.7809 | 7.2848 | -1.0065 |
| CHB | SULT1A3 | 30129255 | 3.0784 | 4.4048 | -0.8346 |
| CHB | SULT1A3 | 30134255 | 4.597  | 5.7601 | -0.5779 |
| CHB | SULT1A3 | 30139255 | 6.6012 | 7.4543 | -0.3358 |
| CHB | SULT1A3 | 30144255 | 5.3752 | 6.6072 | -0.5411 |
| CHB | SULT1A3 | 30149255 | 2.5113 | 4.4048 | -1.1915 |
| CHB | SULT1A3 | 30154255 | 4.668  | 6.2684 | -0.7371 |
| CHB | SULT1A3 | 30159255 | 7.1017 | 7.9625 | -0.319  |
| CHB | SULT1A3 | 30164255 | 7.7165 | 6.946  | 0.3234  |
| CHB | SULT1A3 | 30169255 | 6.6467 | 6.2684 | 0.1742  |
| CHB | SULT1A3 | 30174255 | 4.6891 | 6.4378 | -0.7863 |

## 2\_TajimasD\_data

|     |         |          |        |        |         |
|-----|---------|----------|--------|--------|---------|
| CHB | SULT1A3 | 30179255 | 4.9874 | 7.1154 | -0.8739 |
| CHB | SULT1A3 | 30184255 | 4.4649 | 6.6072 | -0.9409 |
| CHB | SULT1A3 | 30189255 | 2.7561 | 7.1154 | -1.7902 |
| CHB | SULT1A3 | 30194255 | 1.3404 | 6.0989 | -2.2462 |
| CHB | SULT1A3 | 30199255 | 1.1769 | 3.0495 | -1.6104 |
| CHB | SULT1A3 | 30204255 | 0.6832 | 0.8471 | -0.3696 |
| CHB | SULT1A3 | 30209255 | 0.0386 | 0.3388 | -1.2042 |
| CHB | SULT1A3 | 30214255 | 0.0386 | 0.3388 | -1.2042 |
| CHB | SULT1A3 | 30219255 | 0.0097 | 0.1694 | -0.949  |
| CHB | SULT1A3 | 30224255 | 0.1542 | 0.3388 | -0.7405 |
| CHB | SULT1A3 | 30229255 | 0.1445 | 0.1694 | -0.148  |
| CHB | SULT1A3 | 30234255 | 0.0192 | 0.1694 | -0.8925 |
| CHB | SULT1A3 | 30239255 | 0.0192 | 0.1694 | -0.8925 |
| CHB | SULT1A3 | 30244255 | 0      | 0      | 0       |
| CHB | SULT1A3 | 30249255 | 0      | 0      | 0       |
| CHB | SULT1A3 | 30254255 | 0      | 0      | 0       |
| CHB | SULT1A3 | 30259255 | 0      | 0      | 0       |
| CHB | SULT1A3 | 30264255 | 0.1374 | 0.3388 | -0.8079 |
| CHB | SULT1A3 | 30269255 | 0.1472 | 0.5082 | -1.1332 |
| CHB | SULT1A3 | 30274255 | 0.0097 | 0.1694 | -0.949  |
| CHB | SULT1A3 | 30279255 | 0      | 0      | 0       |
| CHB | SULT1A3 | 30284255 | 0.5732 | 0.8471 | -0.6176 |
| CHB | SULT1A3 | 30289255 | 1.0293 | 2.2024 | -1.3136 |
| CHB | SULT1A3 | 30294255 | 0.7049 | 2.2024 | -1.6768 |
| CHB | SULT1A3 | 30299255 | 0.2488 | 1.0165 | -1.5278 |
| CHB | SULT1A3 | 30304255 | 0.3179 | 1.6942 | -1.8888 |
| CHB | SULT1A3 | 30309255 | 0.3954 | 2.5412 | -2.1427 |
| CHB | SULT1A3 | 30314255 | 0.2717 | 1.6942 | -1.9522 |
| CHB | SULT1A3 | 30319255 | 1.2273 | 2.5412 | -1.312  |
| CHB | SULT1A3 | 30324255 | 2.0765 | 6.0989 | -1.8987 |
| CHB | SULT1A3 | 30329255 | 2.1409 | 6.946  | -2.017  |
| CHB | SULT1A3 | 30334255 | 2.5913 | 6.946  | -1.8279 |
| CHB | SULT1A3 | 30339255 | 2.475  | 7.4543 | -1.96   |
| CHB | SULT1A3 | 30344255 | 2.0265 | 5.7601 | -1.8549 |
| CHB | SULT1A3 | 30349255 | 1.657  | 5.4213 | -1.9739 |
| CHB | SULT1A3 | 30354255 | 2.1274 | 5.5907 | -1.7671 |
| CHB | SULT1A3 | 30359255 | 2.6594 | 5.5907 | -1.4956 |
| CHB | SULT1A3 | 30364255 | 1.5068 | 6.4378 | -2.2171 |
| CHB | SULT1A3 | 30369255 | 0.8622 | 5.5907 | -2.4126 |
| CHB | SULT1A3 | 30374255 | 1.1317 | 5.5907 | -2.2751 |
| CHB | SULT1A3 | 30379255 | 1.4801 | 6.0989 | -2.1803 |
| CHB | SULT1A3 | 30384255 | 1.5722 | 5.2519 | -1.9846 |
| CHB | SULT1A3 | 30389255 | 1.766  | 5.9295 | -2.0156 |
| CHB | SULT1A3 | 30394255 | 2.0944 | 7.2848 | -2.0864 |
| CHB | SULT1A3 | 30399255 | 1.6332 | 6.6072 | -2.1846 |
| CHB | SULT1A3 | 30404255 | 1.4457 | 4.7436 | -1.9454 |
| CHB | SULT1A3 | 30409255 | 1.2498 | 4.4048 | -1.9853 |
| CHB | SULT1A3 | 30414255 | 0.9313 | 3.2189 | -1.8807 |
| CHB | SULT1A3 | 30419255 | 1.2159 | 3.8965 | -1.8749 |

## 2\_TajimasD\_data

|     |         |          |        |        |         |
|-----|---------|----------|--------|--------|---------|
| CHB | SULT1A3 | 30424255 | 1.4418 | 5.0825 | -2.0212 |
| CHB | SULT1A3 | 30429255 | 2.5585 | 5.4213 | -1.5012 |
| CHB | SULT1A3 | 30434255 | 2.7969 | 5.0825 | -1.2689 |
| CHB | SULT1A3 | 30439255 | 2.0478 | 5.9295 | -1.8792 |
| CHB | SULT1A3 | 30444255 | 1.3956 | 7.9625 | -2.4335 |
| CHB | SULT1A3 | 30449255 | 1.8164 | 7.6237 | -2.2395 |
| CHB | SULT1A3 | 30454255 | 2.8988 | 7.4543 | -1.7932 |
| CHB | SULT1A3 | 30459255 | 2.5519 | 7.4543 | -1.9297 |
| CHB | SULT1A3 | 30464255 | 2.1563 | 6.4378 | -1.9251 |
| CHB | SULT1A3 | 30469255 | 2.1319 | 6.946  | -2.0208 |
| CHB | SULT1A3 | 30474255 | 1.2692 | 5.9295 | -2.2561 |
| CHB | SULT1A3 | 30479255 | 1.1314 | 3.8965 | -1.934  |
| CHB | SULT1A3 | 30484255 | 1.4068 | 4.4048 | -1.8865 |
| CHB | SULT1A3 | 30489255 | 3.4856 | 7.2848 | -1.5272 |
| CHB | SULT1A3 | 30494255 | 5.0628 | 9.9955 | -1.4812 |
| CHB | SULT1A3 | 30499255 | 4.7026 | 8.4708 | -1.3191 |
| CHB | SULT1A3 | 30504255 | 5.0571 | 6.946  | -0.7929 |
| CHB | SULT1A3 | 30509255 | 4.9742 | 7.2848 | -0.9288 |
| CHB | SULT1A3 | 30514255 | 6.0443 | 8.1319 | -0.7588 |
| CHB | SULT1A3 | 30519255 | 4.2994 | 6.946  | -1.1109 |
| CHB | SULT1A3 | 30524255 | 2.1605 | 5.5907 | -1.7502 |
| CHB | SULT1A3 | 30529255 | 1.5688 | 4.4048 | -1.7846 |
| CHB | SULT1A3 | 30534255 | 0.8449 | 4.066  | -2.1721 |
| CHB | SULT1A3 | 30539255 | 0.7681 | 3.8965 | -2.1881 |
| CHB | SULT1A3 | 30544255 | 0.6215 | 4.066  | -2.3227 |
| CHB | SULT1A3 | 30549255 | 1.1616 | 5.9295 | -2.3082 |
| CHB | SULT1A3 | 30554255 | 1.5441 | 6.2684 | -2.1758 |
| CHB | SULT1A3 | 30559255 | 1.1205 | 5.2519 | -2.2282 |
| CHB | SULT1A3 | 30564255 | 0.7559 | 5.2519 | -2.4248 |
| CHB | SULT1A3 | 30569255 | 0.8348 | 5.5907 | -2.4266 |
| CHB | SULT1A3 | 30574255 | 0.5306 | 4.7436 | -2.4851 |
| CHB | SULT1A3 | 30579255 | 0.861  | 5.4213 | -2.3913 |
| CHB | SULT1A3 | 30584255 | 1.1909 | 5.9295 | -2.294  |
| CHB | SULT1A3 | 30589255 | 1.5087 | 5.9295 | -2.1402 |
| CHB | SULT1A3 | 30594255 | 1.1401 | 5.2519 | -2.2176 |
| CHB | SULT1A3 | 30599255 | 0.7122 | 4.2354 | -2.2936 |
| CHB | SULT1A3 | 30604255 | 0.7676 | 4.2354 | -2.2575 |
| CHB | SULT1A3 | 30609255 | 1.0855 | 4.7436 | -2.1578 |
| CHB | SULT1A3 | 30614255 | 1.4725 | 5.7601 | -2.1302 |
| CHB | SULT1A3 | 30619255 | 0.9838 | 4.913  | -2.2475 |
| CHB | SULT1A3 | 30624255 | 1.2163 | 5.7601 | -2.2575 |
| CHB | SULT1A3 | 30629255 | 1.1902 | 6.0989 | -2.3171 |
| CHB | SULT1A3 | 30634255 | 2.4784 | 6.4378 | -1.7803 |
| CHB | SULT1A3 | 30639255 | 3.6366 | 6.7766 | -1.3479 |
| CHB | SULT1A3 | 30644255 | 4.332  | 6.2684 | -0.8918 |
| CHB | SULT1A3 | 30649255 | 4.7122 | 6.6072 | -0.8323 |
| CHB | SULT1A3 | 30654255 | 2.2132 | 4.4048 | -1.3791 |
| CHB | SULT1A3 | 30659255 | 0.5816 | 3.7271 | -2.2851 |
| CHB | SULT1A3 | 30664255 | 1.1334 | 5.0825 | -2.1925 |

## 2\_TajimasD\_data

|     |         |          |         |         |         |
|-----|---------|----------|---------|---------|---------|
| CHB | SULT1A3 | 30669255 | 1.506   | 6.2684  | -2.1934 |
| CHB | SULT1A3 | 30674255 | 0.8519  | 5.5907  | -2.4178 |
| CHB | SULT1A3 | 30679255 | 0.7824  | 4.4048  | -2.2794 |
| CHB | SULT1A3 | 30684255 | 1.2951  | 4.913   | -2.0694 |
| CHB | SULT1A3 | 30689255 | 1.5003  | 5.4213  | -2.0561 |
| CHB | SULT1A3 | 30694255 | 1.6472  | 5.9295  | -2.0731 |
| CHB | SULT1A3 | 30699255 | 1.3868  | 6.0989  | -2.2243 |
| YRI | SULT1A3 | 29704255 | 3.652   | 9.0754  | -1.7753 |
| YRI | SULT1A3 | 29709255 | 3.6417  | 9.5795  | -1.8486 |
| YRI | SULT1A3 | 29714255 | 6.411   | 12.9408 | -1.5333 |
| YRI | SULT1A3 | 29719255 | 7.528   | 11.7644 | -1.0884 |
| YRI | SULT1A3 | 29724255 | 6.9955  | 9.5795  | -0.8045 |
| YRI | SULT1A3 | 29729255 | 10.8004 | 15.2937 | -0.9003 |
| YRI | SULT1A3 | 29734255 | 10.3005 | 14.7895 | -0.9286 |
| YRI | SULT1A3 | 29739255 | 6.5999  | 8.9073  | -0.7685 |
| YRI | SULT1A3 | 29744255 | 8.8364  | 9.4115  | -0.182  |
| YRI | SULT1A3 | 29749255 | 18.5687 | 14.9575 | 0.7391  |
| YRI | SULT1A3 | 29754255 | 18.5982 | 15.4617 | 0.6219  |
| YRI | SULT1A3 | 29759255 | 11.6918 | 12.7727 | -0.257  |
| YRI | SULT1A3 | 29764255 | 15.1392 | 14.6214 | 0.1083  |
| YRI | SULT1A3 | 29769255 | 16.2271 | 16.9743 | -0.1355 |
| YRI | SULT1A3 | 29774255 | 15.1981 | 15.6298 | -0.0847 |
| YRI | SULT1A3 | 29779255 | 14.2063 | 13.9492 | 0.0562  |
| YRI | SULT1A3 | 29784255 | 10.0013 | 12.1005 | -0.5252 |
| YRI | SULT1A3 | 29789255 | 12.7922 | 10.924  | 0.5145  |
| YRI | SULT1A3 | 29794255 | 12.4986 | 9.9157  | 0.7787  |
| YRI | SULT1A3 | 29799255 | 5.4765  | 7.8989  | -0.9012 |
| YRI | SULT1A3 | 29804255 | 4.2374  | 8.5712  | -1.4956 |
| YRI | SULT1A3 | 29809255 | 4.1057  | 9.0754  | -1.6268 |
| YRI | SULT1A3 | 29814255 | 3.9329  | 9.4115  | -1.7339 |
| YRI | SULT1A3 | 29819255 | 4.0788  | 11.5963 | -1.9576 |
| YRI | SULT1A3 | 29824255 | 5.2252  | 12.2685 | -1.7393 |
| YRI | SULT1A3 | 29829255 | 7.5677  | 10.756  | -0.891  |
| YRI | SULT1A3 | 29834255 | 7.9261  | 12.9408 | -1.1775 |
| YRI | SULT1A3 | 29839255 | 7.0527  | 11.9324 | -1.237  |
| YRI | SULT1A3 | 29844255 | 6.4759  | 6.8906  | -0.1747 |
| YRI | SULT1A3 | 29849255 | 4.3384  | 6.7225  | -1.0273 |
| YRI | SULT1A3 | 29854255 | 3.4878  | 8.235   | -1.6998 |
| YRI | SULT1A3 | 29859255 | 6.0263  | 10.924  | -1.3489 |
| YRI | SULT1A3 | 29864255 | 8.4015  | 12.6047 | -1.0118 |
| YRI | SULT1A3 | 29869255 | 5.5471  | 8.9073  | -1.1191 |
| YRI | SULT1A3 | 29874255 | 5.2379  | 10.4199 | -1.4917 |
| YRI | SULT1A3 | 29879255 | 7.2788  | 12.4366 | -1.2575 |
| YRI | SULT1A3 | 29884255 | 7.1166  | 9.9157  | -0.8439 |
| YRI | SULT1A3 | 29889255 | 7.2142  | 9.7476  | -0.7761 |
| YRI | SULT1A3 | 29894255 | 7.9281  | 10.0837 | -0.6398 |
| YRI | SULT1A3 | 29899255 | 7.8679  | 9.4115  | -0.4885 |
| YRI | SULT1A3 | 29904255 | 7.891   | 9.4115  | -0.4812 |
| YRI | SULT1A3 | 29909255 | 10.0742 | 10.2518 | -0.0519 |

## 2\_TajimasD\_data

|     |         |          |         |         |         |
|-----|---------|----------|---------|---------|---------|
| YRI | SULT1A3 | 29914255 | 6.679   | 7.5628  | -0.3421 |
| YRI | SULT1A3 | 29919255 | 5.0163  | 8.067   | -1.1132 |
| YRI | SULT1A3 | 29924255 | 7.2895  | 9.2434  | -0.6288 |
| YRI | SULT1A3 | 29929255 | 7.6771  | 9.4115  | -0.5489 |
| YRI | SULT1A3 | 29934255 | 9.481   | 10.756  | -0.3563 |
| YRI | SULT1A3 | 29939255 | 9.9245  | 9.2434  | 0.2192  |
| YRI | SULT1A3 | 29944255 | 8.9628  | 7.8989  | 0.3958  |
| YRI | SULT1A3 | 29949255 | 6.1718  | 7.3947  | -0.4832 |
| YRI | SULT1A3 | 29954255 | 5.09    | 7.7309  | -1.002  |
| YRI | SULT1A3 | 29959255 | 5.8274  | 8.4031  | -0.9053 |
| YRI | SULT1A3 | 29964255 | 5.4547  | 7.8989  | -0.9093 |
| YRI | SULT1A3 | 29969255 | 7.3823  | 8.067   | -0.2499 |
| YRI | SULT1A3 | 29974255 | 9.1512  | 10.5879 | -0.4074 |
| YRI | SULT1A3 | 29979255 | 8.0442  | 9.4115  | -0.4327 |
| YRI | SULT1A3 | 29984255 | 6.1257  | 7.5628  | -0.5563 |
| YRI | SULT1A3 | 29989255 | 4.9634  | 7.8989  | -1.0921 |
| YRI | SULT1A3 | 29994255 | 5.364   | 7.2267  | -0.7516 |
| YRI | SULT1A3 | 29999255 | 5.1433  | 7.5628  | -0.9367 |
| YRI | SULT1A3 | 30004255 | 4.091   | 8.235   | -1.4838 |
| YRI | SULT1A3 | 30009255 | 8.2347  | 9.4115  | -0.3724 |
| YRI | SULT1A3 | 30014255 | 10.9852 | 10.5879 | 0.1127  |
| YRI | SULT1A3 | 30019255 | 7.8838  | 8.067   | -0.0669 |
| YRI | SULT1A3 | 30024255 | 6.3153  | 7.3947  | -0.4265 |
| YRI | SULT1A3 | 30029255 | 6.814   | 9.0754  | -0.7403 |
| YRI | SULT1A3 | 30034255 | 7.2843  | 8.9073  | -0.5406 |
| YRI | SULT1A3 | 30039255 | 7.3682  | 8.067   | -0.255  |
| YRI | SULT1A3 | 30044255 | 9.3899  | 10.0837 | -0.2059 |
| YRI | SULT1A3 | 30049255 | 9.4628  | 10.756  | -0.3614 |
| YRI | SULT1A3 | 30054255 | 8.8609  | 11.9324 | -0.7786 |
| YRI | SULT1A3 | 30059255 | 9.5469  | 13.1089 | -0.8263 |
| YRI | SULT1A3 | 30064255 | 7.1044  | 11.4282 | -1.1415 |
| YRI | SULT1A3 | 30069255 | 4.1666  | 9.5795  | -1.6852 |
| YRI | SULT1A3 | 30074255 | 2.8756  | 8.5712  | -1.9656 |
| YRI | SULT1A3 | 30079255 | 4.6622  | 10.2518 | -1.6337 |
| YRI | SULT1A3 | 30084255 | 4.864   | 9.5795  | -1.4681 |
| YRI | SULT1A3 | 30089255 | 5.9607  | 10.5879 | -1.3123 |
| YRI | SULT1A3 | 30094255 | 7.3598  | 11.5963 | -1.1032 |
| YRI | SULT1A3 | 30099255 | 4.7037  | 8.5712  | -1.3347 |
| YRI | SULT1A3 | 30104255 | 3.1523  | 6.5544  | -1.4999 |
| YRI | SULT1A3 | 30109255 | 3.5007  | 8.067   | -1.6663 |
| YRI | SULT1A3 | 30114255 | 5.1787  | 9.4115  | -1.3396 |
| YRI | SULT1A3 | 30119255 | 7.9522  | 10.5879 | -0.7475 |
| YRI | SULT1A3 | 30124255 | 7.2056  | 9.9157  | -0.8171 |
| YRI | SULT1A3 | 30129255 | 4.6483  | 8.4031  | -1.3197 |
| YRI | SULT1A3 | 30134255 | 5.1989  | 9.2434  | -1.3016 |
| YRI | SULT1A3 | 30139255 | 7.7253  | 10.0837 | -0.7    |
| YRI | SULT1A3 | 30144255 | 6.9199  | 8.067   | -0.4186 |
| YRI | SULT1A3 | 30149255 | 3.1925  | 4.7057  | -0.8957 |
| YRI | SULT1A3 | 30154255 | 6.7552  | 7.5628  | -0.3126 |

## 2\_TajimasD\_data

|     |         |          |         |        |         |
|-----|---------|----------|---------|--------|---------|
| YRI | SULT1A3 | 30159255 | 11.2043 | 9.7476 | 0.4462  |
| YRI | SULT1A3 | 30164255 | 11.4239 | 8.235  | 1.1418  |
| YRI | SULT1A3 | 30169255 | 10.3981 | 7.7309 | 1.012   |
| YRI | SULT1A3 | 30174255 | 8.8621  | 6.8906 | 0.8307  |
| YRI | SULT1A3 | 30179255 | 8.4102  | 6.8906 | 0.6403  |
| YRI | SULT1A3 | 30184255 | 7.9046  | 7.2267 | 0.2735  |
| YRI | SULT1A3 | 30189255 | 6.5128  | 6.8906 | -0.1592 |
| YRI | SULT1A3 | 30194255 | 3.8226  | 6.8906 | -1.2928 |
| YRI | SULT1A3 | 30199255 | 2.1227  | 4.7057 | -1.529  |
| YRI | SULT1A3 | 30204255 | 1.2055  | 1.6806 | -0.6536 |
| YRI | SULT1A3 | 30209255 | 0.1975  | 1.0084 | -1.6167 |
| YRI | SULT1A3 | 30214255 | 0.0736  | 0.8403 | -1.7317 |
| YRI | SULT1A3 | 30219255 | 0.0183  | 0.1681 | -0.8905 |
| YRI | SULT1A3 | 30224255 | 0.5038  | 0.1681 | 1.9956  |
| YRI | SULT1A3 | 30229255 | 0.5038  | 0.1681 | 1.9956  |
| YRI | SULT1A3 | 30234255 | 0.0369  | 0.5042 | -1.4686 |
| YRI | SULT1A3 | 30239255 | 0.0461  | 0.6722 | -1.6391 |
| YRI | SULT1A3 | 30244255 | 0.0093  | 0.1681 | -0.944  |
| YRI | SULT1A3 | 30249255 | 0       | 0      | 0       |
| YRI | SULT1A3 | 30254255 | 0       | 0      | 0       |
| YRI | SULT1A3 | 30259255 | 0       | 0      | 0       |
| YRI | SULT1A3 | 30264255 | 0.2059  | 1.0084 | -1.5999 |
| YRI | SULT1A3 | 30269255 | 0.2059  | 1.0084 | -1.5999 |
| YRI | SULT1A3 | 30274255 | 0       | 0      | 0       |
| YRI | SULT1A3 | 30279255 | 0.0891  | 0.1681 | -0.4696 |
| YRI | SULT1A3 | 30284255 | 1.5026  | 1.8487 | -0.4427 |
| YRI | SULT1A3 | 30289255 | 3.6176  | 3.3612 | 0.2026  |
| YRI | SULT1A3 | 30294255 | 4.2831  | 2.689  | 1.515   |
| YRI | SULT1A3 | 30299255 | 2.265   | 2.1848 | 0.09    |
| YRI | SULT1A3 | 30304255 | 1.0798  | 3.0251 | -1.6781 |
| YRI | SULT1A3 | 30309255 | 1.4368  | 3.1932 | -1.4485 |
| YRI | SULT1A3 | 30314255 | 1.1195  | 2.0167 | -1.0727 |
| YRI | SULT1A3 | 30319255 | 2.1406  | 4.3696 | -1.4074 |
| YRI | SULT1A3 | 30324255 | 4.7634  | 9.4115 | -1.4711 |
| YRI | SULT1A3 | 30329255 | 5.8986  | 8.4031 | -0.8802 |
| YRI | SULT1A3 | 30334255 | 6.9561  | 7.2267 | -0.1092 |
| YRI | SULT1A3 | 30339255 | 6.48    | 7.2267 | -0.3013 |
| YRI | SULT1A3 | 30344255 | 5.0345  | 6.8906 | -0.7821 |
| YRI | SULT1A3 | 30349255 | 5.7907  | 9.2434 | -1.1112 |
| YRI | SULT1A3 | 30354255 | 4.2395  | 7.2267 | -1.2054 |
| YRI | SULT1A3 | 30359255 | 4.005   | 7.2267 | -1.3    |
| YRI | SULT1A3 | 30364255 | 4.6521  | 9.0754 | -1.4479 |
| YRI | SULT1A3 | 30369255 | 3.131   | 7.2267 | -1.6527 |
| YRI | SULT1A3 | 30374255 | 3.6304  | 6.8906 | -1.3737 |
| YRI | SULT1A3 | 30379255 | 4.2415  | 7.5628 | -1.2858 |
| YRI | SULT1A3 | 30384255 | 4.7458  | 7.3947 | -1.0467 |
| YRI | SULT1A3 | 30389255 | 5.4198  | 6.5544 | -0.5002 |
| YRI | SULT1A3 | 30394255 | 6.4467  | 6.8906 | -0.187  |
| YRI | SULT1A3 | 30399255 | 6.024   | 7.2267 | -0.4853 |



## 2\_TajimasD\_data

|     |         |          |         |         |         |
|-----|---------|----------|---------|---------|---------|
| YRI | SULT1A3 | 30404255 | 5.2773  | 9.5795  | -1.3394 |
| YRI | SULT1A3 | 30409255 | 4.8705  | 9.2434  | -1.4073 |
| YRI | SULT1A3 | 30414255 | 4.9572  | 6.7225  | -0.7607 |
| YRI | SULT1A3 | 30419255 | 5.841   | 6.5544  | -0.3145 |
| YRI | SULT1A3 | 30424255 | 3.8195  | 5.2099  | -0.7526 |
| YRI | SULT1A3 | 30429255 | 4.6562  | 6.8906  | -0.9415 |
| YRI | SULT1A3 | 30434255 | 5.0118  | 7.7309  | -1.0317 |
| YRI | SULT1A3 | 30439255 | 4.5085  | 7.2267  | -1.0968 |
| YRI | SULT1A3 | 30444255 | 4.7451  | 8.7392  | -1.3539 |
| YRI | SULT1A3 | 30449255 | 4.3412  | 9.2434  | -1.5777 |
| YRI | SULT1A3 | 30454255 | 5.6868  | 9.9157  | -1.275  |
| YRI | SULT1A3 | 30459255 | 6.5401  | 10.0837 | -1.0518 |
| YRI | SULT1A3 | 30464255 | 5.2767  | 7.7309  | -0.9312 |
| YRI | SULT1A3 | 30469255 | 6.5505  | 10.2518 | -1.0818 |
| YRI | SULT1A3 | 30474255 | 6.3212  | 10.924  | -1.2677 |
| YRI | SULT1A3 | 30479255 | 3.6401  | 7.5628  | -1.5186 |
| YRI | SULT1A3 | 30484255 | 4.1537  | 7.0586  | -1.1975 |
| YRI | SULT1A3 | 30489255 | 7.1451  | 9.5795  | -0.7579 |
| YRI | SULT1A3 | 30494255 | 9.7089  | 12.1005 | -0.5983 |
| YRI | SULT1A3 | 30499255 | 8.1867  | 11.0921 | -0.7888 |
| YRI | SULT1A3 | 30504255 | 8.0242  | 10.4199 | -0.6896 |
| YRI | SULT1A3 | 30509255 | 10.5855 | 12.1005 | -0.379  |
| YRI | SULT1A3 | 30514255 | 11.7541 | 12.6047 | -0.2048 |
| YRI | SULT1A3 | 30519255 | 9.1404  | 10.924  | -0.4912 |
| YRI | SULT1A3 | 30524255 | 5.5124  | 9.0754  | -1.1663 |
| YRI | SULT1A3 | 30529255 | 3.7528  | 7.2267  | -1.4018 |
| YRI | SULT1A3 | 30534255 | 4.6665  | 9.9157  | -1.5826 |
| YRI | SULT1A3 | 30539255 | 4.4832  | 10.4199 | -1.709  |
| YRI | SULT1A3 | 30544255 | 3.5523  | 8.4031  | -1.7049 |
| YRI | SULT1A3 | 30549255 | 4.0389  | 9.7476  | -1.7488 |
| YRI | SULT1A3 | 30554255 | 4.2566  | 9.5795  | -1.6572 |
| YRI | SULT1A3 | 30559255 | 3.9677  | 9.2434  | -1.6979 |
| YRI | SULT1A3 | 30564255 | 3.244   | 9.5795  | -1.9724 |
| YRI | SULT1A3 | 30569255 | 4.2295  | 10.4199 | -1.782  |
| YRI | SULT1A3 | 30574255 | 3.6244  | 8.235   | -1.6509 |
| YRI | SULT1A3 | 30579255 | 2.58    | 5.378   | -1.4725 |
| YRI | SULT1A3 | 30584255 | 3.8834  | 7.2267  | -1.3491 |
| YRI | SULT1A3 | 30589255 | 6.2711  | 8.9073  | -0.878  |
| YRI | SULT1A3 | 30594255 | 5.9111  | 9.4115  | -1.1079 |
| YRI | SULT1A3 | 30599255 | 4.784   | 8.067   | -1.198  |
| YRI | SULT1A3 | 30604255 | 6.0857  | 7.0586  | -0.4011 |
| YRI | SULT1A3 | 30609255 | 5.9378  | 6.7225  | -0.3381 |
| YRI | SULT1A3 | 30614255 | 5.8151  | 7.0586  | -0.5126 |
| YRI | SULT1A3 | 30619255 | 4.4596  | 7.2267  | -1.1166 |
| YRI | SULT1A3 | 30624255 | 4.8314  | 8.5712  | -1.2906 |
| YRI | SULT1A3 | 30629255 | 5.2837  | 9.5795  | -1.3374 |
| YRI | SULT1A3 | 30634255 | 5.2764  | 9.5795  | -1.3397 |
| YRI | SULT1A3 | 30639255 | 7.0165  | 9.0754  | -0.674  |
| YRI | SULT1A3 | 30644255 | 9.4989  | 10.0837 | -0.1736 |

## 2\_TajimasD\_data

|     |         |           |         |         |         |
|-----|---------|-----------|---------|---------|---------|
| YRI | SULT1A3 | 30649255  | 9.9033  | 11.2602 | -0.3632 |
| YRI | SULT1A3 | 30654255  | 5.0235  | 7.5628  | -0.983  |
| YRI | SULT1A3 | 30659255  | 2.1668  | 5.378   | -1.69   |
| YRI | SULT1A3 | 30664255  | 3.8912  | 7.2267  | -1.3459 |
| YRI | SULT1A3 | 30669255  | 5.0586  | 7.3947  | -0.9231 |
| YRI | SULT1A3 | 30674255  | 3.1883  | 6.3864  | -1.4434 |
| YRI | SULT1A3 | 30679255  | 2.9578  | 9.4115  | -2.0425 |
| YRI | SULT1A3 | 30684255  | 5.0503  | 10.924  | -1.6177 |
| YRI | SULT1A3 | 30689255  | 5.6773  | 10.4199 | -1.3652 |
| YRI | SULT1A3 | 30694255  | 6.309   | 9.7476  | -1.0534 |
| YRI | SULT1A3 | 30699255  | 6.2295  | 8.9073  | -0.8919 |
| CEU | TBC1D3  | 120584494 | 10.1053 | 12.9627 | -0.6741 |
| CEU | TBC1D3  | 120589494 | 13.9738 | 15.0095 | -0.2126 |
| CEU | TBC1D3  | 120594494 | 9.4609  | 9.2104  | 0.0814  |
| CEU | TBC1D3  | 120599494 | 6.4086  | 6.8225  | -0.1771 |
| CEU | TBC1D3  | 120604494 | 5.8097  | 8.5281  | -0.9485 |
| CEU | TBC1D3  | 120609494 | 4.4061  | 7.6753  | -1.2566 |
| CEU | TBC1D3  | 120614494 | 5.5834  | 8.8692  | -1.1057 |
| CEU | TBC1D3  | 120619494 | 7.1888  | 9.7221  | -0.7829 |
| CEU | TBC1D3  | 120624494 | 6.7615  | 9.8926  | -0.9521 |
| CEU | TBC1D3  | 120629494 | 13.8281 | 13.645  | 0.0411  |
| CEU | TBC1D3  | 120634494 | 20.993  | 15.3506 | 1.1336  |
| CEU | TBC1D3  | 120639494 | 23.7378 | 16.374  | 1.3911  |
| CEU | TBC1D3  | 120644494 | 23.2604 | 14.6684 | 1.8026  |
| CEU | TBC1D3  | 120649494 | 15.5502 | 9.3809  | 1.9709  |
| CEU | TBC1D3  | 120654494 | 14.5267 | 9.3809  | 1.6439  |
| CEU | TBC1D3  | 120659494 | 18.2762 | 11.7688 | 1.6817  |
| CEU | TBC1D3  | 120664494 | 13.8147 | 10.2337 | 1.055   |
| CEU | TBC1D3  | 120669494 | 9.8738  | 8.8692  | 0.338   |
| CEU | TBC1D3  | 120674494 | 9.9182  | 8.3576  | 0.5547  |
| CEU | TBC1D3  | 120679494 | 12.0391 | 8.187   | 1.3955  |
| CEU | TBC1D3  | 120684494 | 12.3707 | 9.5515  | 0.8857  |
| CEU | TBC1D3  | 120689494 | 8.5527  | 9.2104  | -0.2137 |
| CEU | TBC1D3  | 120694494 | 6.3502  | 6.8225  | -0.2021 |
| CEU | TBC1D3  | 120699494 | 5.6652  | 4.7757  | 0.5232  |
| CEU | TBC1D3  | 120704494 | 5.6679  | 4.6052  | 0.6452  |
| CEU | TBC1D3  | 120709494 | 5.7528  | 5.1169  | 0.352   |
| CEU | TBC1D3  | 120714494 | 7.1025  | 5.458   | 0.8597  |
| CEU | TBC1D3  | 120719494 | 7.7514  | 5.6286  | 1.0798  |
| CEU | TBC1D3  | 120724494 | 8.2814  | 5.6286  | 1.3494  |
| CEU | TBC1D3  | 120729494 | 14.6562 | 8.0164  | 2.4524  |
| CEU | TBC1D3  | 120734494 | 17.8596 | 10.5749 | 2.0814  |
| CEU | TBC1D3  | 120739494 | 14.9722 | 9.5515  | 1.703   |
| CEU | TBC1D3  | 120744494 | 12.0381 | 7.5047  | 1.7787  |
| CEU | TBC1D3  | 120749494 | 12.5644 | 9.3809  | 1.017   |
| CEU | TBC1D3  | 120754494 | 17.5638 | 13.4744 | 0.93    |
| CEU | TBC1D3  | 120759494 | 17.2614 | 12.2805 | 1.2366  |
| CEU | TBC1D3  | 120764494 | 12.0159 | 8.6987  | 1.1365  |
| CEU | TBC1D3  | 120769494 | 12.4809 | 8.8692  | 1.2153  |

## 2\_TajimasD\_data

|     |        |           |         |         |         |
|-----|--------|-----------|---------|---------|---------|
| CEU | TBC1D3 | 120774494 | 17.1556 | 10.5749 | 1.8802  |
| CEU | TBC1D3 | 120779494 | 16.2006 | 11.7688 | 1.1453  |
| CEU | TBC1D3 | 120784494 | 20.1933 | 16.5446 | 0.6825  |
| CEU | TBC1D3 | 120789494 | 18.5711 | 15.0095 | 0.7311  |
| CEU | TBC1D3 | 120794494 | 11.6347 | 8.3576  | 1.1649  |
| CEU | TBC1D3 | 120799494 | 12.6284 | 8.6987  | 1.3463  |
| CEU | TBC1D3 | 120804494 | 12.1543 | 9.3809  | 0.886   |
| CEU | TBC1D3 | 120809494 | 8.2331  | 6.9931  | 0.5188  |
| CEU | TBC1D3 | 120814494 | 5.6271  | 5.458   | 0.0884  |
| CEU | TBC1D3 | 120819494 | 6.0616  | 6.4814  | -0.1882 |
| CEU | TBC1D3 | 120824494 | 6.8316  | 7.5047  | -0.2641 |
| CEU | TBC1D3 | 120829494 | 6.7508  | 7.6753  | -0.3554 |
| CEU | TBC1D3 | 120834494 | 6.4236  | 6.9931  | -0.2383 |
| CEU | TBC1D3 | 120839494 | 11.24   | 7.6753  | 1.3702  |
| CEU | TBC1D3 | 120844494 | 13.1577 | 8.8692  | 1.4431  |
| CEU | TBC1D3 | 120849494 | 17.5205 | 12.1099 | 1.3612  |
| CEU | TBC1D3 | 120854494 | 23.6553 | 15.8623 | 1.5175  |
| CEU | TBC1D3 | 120859494 | 22.6566 | 15.5212 | 1.4186  |
| CEU | TBC1D3 | 120864494 | 23.5287 | 14.1567 | 2.0338  |
| CEU | TBC1D3 | 120869494 | 20.676  | 12.2805 | 2.0844  |
| CEU | TBC1D3 | 120874494 | 16.2529 | 11.2571 | 1.3462  |
| CEU | TBC1D3 | 120879494 | 16.2624 | 11.4277 | 1.2845  |
| CEU | TBC1D3 | 120884494 | 14.728  | 10.0632 | 1.396   |
| CEU | TBC1D3 | 120889494 | 13.6754 | 9.3809  | 1.3719  |
| CEU | TBC1D3 | 120894494 | 16.1874 | 11.2571 | 1.3285  |
| CEU | TBC1D3 | 120899494 | 11.603  | 8.5281  | 1.0729  |
| CEU | TBC1D3 | 120904494 | 7.5221  | 6.4814  | 0.4665  |
| CEU | TBC1D3 | 120909494 | 9.7896  | 8.5281  | 0.4402  |
| CEU | TBC1D3 | 120914494 | 8.5281  | 6.9931  | 0.6423  |
| CEU | TBC1D3 | 120919494 | 7.062   | 5.1169  | 1.0766  |
| CEU | TBC1D3 | 120924494 | 5.9992  | 5.2874  | 0.3827  |
| CEU | TBC1D3 | 120929494 | 6.2795  | 5.9697  | 0.1495  |
| CEU | TBC1D3 | 120934494 | 7.6823  | 6.9931  | 0.2884  |
| CEU | TBC1D3 | 120939494 | 8.5401  | 7.1636  | 0.5635  |
| CEU | TBC1D3 | 120944494 | 8.1736  | 6.8225  | 0.5781  |
| CEU | TBC1D3 | 120949494 | 7.3793  | 7.8459  | -0.1758 |
| CEU | TBC1D3 | 120954494 | 11.3496 | 13.3039 | -0.4498 |
| CEU | TBC1D3 | 120959494 | 16.6273 | 20.6381 | -0.6066 |
| CEU | TBC1D3 | 120964494 | 17.3278 | 21.6614 | -0.6255 |
| CEU | TBC1D3 | 120969494 | 13.3812 | 17.3974 | -0.7159 |
| CEU | TBC1D3 | 120974494 | 9.818   | 13.4744 | -0.8315 |
| CEU | TBC1D3 | 120979494 | 7.7535  | 11.4277 | -0.9762 |
| CEU | TBC1D3 | 120984494 | 8.115   | 10.0632 | -0.583  |
| CEU | TBC1D3 | 120989494 | 11.585  | 9.7221  | 0.5757  |
| CEU | TBC1D3 | 120994494 | 9.2732  | 9.7221  | -0.1387 |
| CEU | TBC1D3 | 120999494 | 7.7902  | 10.916  | -0.8669 |
| CEU | TBC1D3 | 121004494 | 14.1016 | 12.4511 | 0.4045  |
| CEU | TBC1D3 | 121009494 | 16.7994 | 13.3039 | 0.8046  |
| CEU | TBC1D3 | 121014494 | 12.7666 | 11.0866 | 0.4592  |

## 2\_TajimasD\_data

|     |        |           |         |         |         |
|-----|--------|-----------|---------|---------|---------|
| CEU | TBC1D3 | 121019494 | 8.7339  | 6.8225  | 0.8179  |
| CEU | TBC1D3 | 121024494 | 9.918   | 9.0398  | 0.2904  |
| CEU | TBC1D3 | 121029494 | 12.384  | 11.4277 | 0.2541  |
| CEU | TBC1D3 | 121034494 | 10.5104 | 9.8926  | 0.1879  |
| CEU | TBC1D3 | 121039494 | 9.5972  | 8.5281  | 0.373   |
| CEU | TBC1D3 | 121044494 | 13.0495 | 11.0866 | 0.5366  |
| CEU | TBC1D3 | 121049494 | 15.4789 | 12.6216 | 0.6913  |
| CEU | TBC1D3 | 121054494 | 16.088  | 12.1099 | 1.0008  |
| CEU | TBC1D3 | 121059494 | 12.6298 | 11.0866 | 0.4218  |
| CEU | TBC1D3 | 121064494 | 9.4263  | 10.4043 | -0.2837 |
| CEU | TBC1D3 | 121069494 | 15.9777 | 15.5212 | 0.0908  |
| CEU | TBC1D3 | 121074494 | 22.5132 | 18.7619 | 0.6219  |
| CEU | TBC1D3 | 121079494 | 16.9327 | 14.4978 | 0.5166  |
| CEU | TBC1D3 | 121084494 | 9.8042  | 9.0398  | 0.2527  |
| CEU | TBC1D3 | 121089494 | 7.9664  | 6.9931  | 0.4072  |
| CEU | TBC1D3 | 121094494 | 6.9761  | 7.1636  | -0.0768 |
| CEU | TBC1D3 | 121099494 | 6.6555  | 7.1636  | -0.208  |
| CEU | TBC1D3 | 121104494 | 5.6964  | 5.9697  | -0.1319 |
| CEU | TBC1D3 | 121109494 | 4.2682  | 5.7991  | -0.7582 |
| CEU | TBC1D3 | 121114494 | 4.0326  | 5.458   | -0.7452 |
| CEU | TBC1D3 | 121119494 | 6.5801  | 7.1636  | -0.2389 |
| CEU | TBC1D3 | 121124494 | 8.2775  | 9.3809  | -0.3525 |
| CEU | TBC1D3 | 121129494 | 5.7311  | 8.187   | -0.8897 |
| CEU | TBC1D3 | 121134494 | 3.8997  | 7.6753  | -1.4512 |
| CEU | TBC1D3 | 121139494 | 5.0016  | 8.0164  | -1.1135 |
| CEU | TBC1D3 | 121144494 | 6.8415  | 7.5047  | -0.2602 |
| CEU | TBC1D3 | 121149494 | 7.7829  | 8.187   | -0.1464 |
| CEU | TBC1D3 | 121154494 | 10.7155 | 9.5515  | 0.3657  |
| CEU | TBC1D3 | 121159494 | 14.6046 | 10.2337 | 1.2877  |
| CEU | TBC1D3 | 121164494 | 14.1488 | 11.0866 | 0.837   |
| CEU | TBC1D3 | 121169494 | 10.6372 | 9.5515  | 0.3411  |
| CEU | TBC1D3 | 121174494 | 10.6477 | 8.8692  | 0.5985  |
| CEU | TBC1D3 | 121179494 | 10.3564 | 7.6753  | 1.0305  |
| CEU | TBC1D3 | 121184494 | 10.389  | 7.5047  | 1.1317  |
| CEU | TBC1D3 | 121189494 | 11.591  | 9.2104  | 0.7736  |
| CEU | TBC1D3 | 121194494 | 10.4251 | 8.187   | 0.8108  |
| CEU | TBC1D3 | 121199494 | 6.2865  | 7.5047  | -0.478  |
| CEU | TBC1D3 | 121204494 | 4.5859  | 7.3342  | -1.1012 |
| CEU | TBC1D3 | 121209494 | 7.0474  | 6.8225  | 0.0962  |
| CEU | TBC1D3 | 121214494 | 9.1435  | 7.3342  | 0.7249  |
| CEU | TBC1D3 | 121219494 | 12.14   | 10.7454 | 0.3925  |
| CEU | TBC1D3 | 121224494 | 9.6042  | 9.5515  | 0.0166  |
| CEU | TBC1D3 | 121229494 | 5.5939  | 6.8225  | -0.5257 |
| CEU | TBC1D3 | 121234494 | 5.786   | 7.8459  | -0.776  |
| CEU | TBC1D3 | 121239494 | 6.7369  | 9.7221  | -0.9225 |
| CEU | TBC1D3 | 121244494 | 8.3854  | 11.9394 | -0.9061 |
| CEU | TBC1D3 | 121249494 | 14.3677 | 17.2268 | -0.5145 |
| CEU | TBC1D3 | 121254494 | 14.2718 | 15.5212 | -0.2484 |
| CEU | TBC1D3 | 121259494 | 10.2129 | 9.5515  | 0.2078  |

## 2\_TajimasD\_data

|     |        |           |         |         |         |
|-----|--------|-----------|---------|---------|---------|
| CEU | TBC1D3 | 121264494 | 9.2523  | 9.8926  | -0.1947 |
| CEU | TBC1D3 | 121269494 | 12.3496 | 11.9394 | 0.1046  |
| CEU | TBC1D3 | 121274494 | 15.462  | 12.4511 | 0.7379  |
| CEU | TBC1D3 | 121279494 | 11.9953 | 10.4043 | 0.4615  |
| CEU | TBC1D3 | 121284494 | 13.4704 | 11.5982 | 0.4905  |
| CEU | TBC1D3 | 121289494 | 14.5253 | 13.1333 | 0.3244  |
| CEU | TBC1D3 | 121294494 | 9.202   | 9.3809  | -0.0572 |
| CEU | TBC1D3 | 121299494 | 8.9959  | 8.0164  | 0.3618  |
| CEU | TBC1D3 | 121304494 | 15.0173 | 10.7454 | 1.2024  |
| CEU | TBC1D3 | 121309494 | 13.7811 | 11.2571 | 0.6801  |
| CEU | TBC1D3 | 121314494 | 9.1812  | 10.4043 | -0.3548 |
| CEU | TBC1D3 | 121319494 | 11.0963 | 9.8926  | 0.366   |
| CEU | TBC1D3 | 121324494 | 10.3065 | 8.3576  | 0.6928  |
| CEU | TBC1D3 | 121329494 | 9.1492  | 6.8225  | 0.9956  |
| CEU | TBC1D3 | 121334494 | 11.7661 | 8.5281  | 1.1298  |
| CEU | TBC1D3 | 121339494 | 11.5761 | 8.6987  | 0.9858  |
| CEU | TBC1D3 | 121344494 | 12.1495 | 9.0398  | 1.0281  |
| CEU | TBC1D3 | 121349494 | 11.1435 | 9.0398  | 0.6955  |
| CEU | TBC1D3 | 121354494 | 9.7963  | 8.6987  | 0.376   |
| CEU | TBC1D3 | 121359494 | 10.4747 | 9.5515  | 0.29    |
| CEU | TBC1D3 | 121364494 | 11.7335 | 9.3809  | 0.7516  |
| CEU | TBC1D3 | 121369494 | 11.8126 | 9.8926  | 0.5838  |
| CEU | TBC1D3 | 121374494 | 8.3022  | 10.5749 | -0.6493 |
| CEU | TBC1D3 | 121379494 | 8.2843  | 11.4277 | -0.8351 |
| CEU | TBC1D3 | 121384494 | 8.1001  | 10.5749 | -0.7071 |
| CEU | TBC1D3 | 121389494 | 7.3819  | 11.0866 | -1.0127 |
| CEU | TBC1D3 | 121394494 | 7.8029  | 11.2571 | -0.9308 |
| CEU | TBC1D3 | 121399494 | 7.9487  | 10.916  | -0.823  |
| CEU | TBC1D3 | 121404494 | 7.2011  | 12.2805 | -1.2611 |
| CEU | TBC1D3 | 121409494 | 4.7595  | 9.5515  | -1.5055 |
| CEU | TBC1D3 | 121414494 | 6.4113  | 9.5515  | -0.9865 |
| CEU | TBC1D3 | 121419494 | 9.2845  | 13.4744 | -0.9529 |
| CEU | TBC1D3 | 121424494 | 7.4391  | 12.4511 | -1.2283 |
| CEU | TBC1D3 | 121429494 | 4.5706  | 10.7454 | -1.738  |
| CEU | TBC1D3 | 121434494 | 4.3142  | 9.3809  | -1.6186 |
| CEU | TBC1D3 | 121439494 | 6.6001  | 9.7221  | -0.9648 |
| CEU | TBC1D3 | 121444494 | 5.792   | 10.916  | -1.4211 |
| CEU | TBC1D3 | 121449494 | 3.9355  | 10.0632 | -1.8338 |
| CEU | TBC1D3 | 121454494 | 4.9633  | 10.2337 | -1.5527 |
| CEU | TBC1D3 | 121459494 | 6.9359  | 10.4043 | -1.0062 |
| CEU | TBC1D3 | 121464494 | 7.115   | 10.2337 | -0.9188 |
| CEU | TBC1D3 | 121469494 | 6.0451  | 10.0632 | -1.2025 |
| CEU | TBC1D3 | 121474494 | 7.0992  | 11.5982 | -1.1788 |
| CEU | TBC1D3 | 121479494 | 7.7512  | 12.9627 | -1.2295 |
| CEU | TBC1D3 | 121484494 | 4.4844  | 6.9931  | -1.0497 |
| CEU | TBC1D3 | 121489494 | 5.2651  | 7.8459  | -0.9722 |
| CEU | TBC1D3 | 121494494 | 8.3482  | 13.4744 | -1.1658 |
| CEU | TBC1D3 | 121499494 | 7.0429  | 12.1099 | -1.2747 |
| CEU | TBC1D3 | 121504494 | 6.4519  | 10.5749 | -1.178  |

## 2\_TajimasD\_data

|     |        |           |         |         |         |
|-----|--------|-----------|---------|---------|---------|
| CEU | TBC1D3 | 121509494 | 6.873   | 10.916  | -1.1213 |
| CEU | TBC1D3 | 121514494 | 8.3206  | 12.4511 | -1.0122 |
| CEU | TBC1D3 | 121519494 | 8.5059  | 10.4043 | -0.5507 |
| CEU | TBC1D3 | 121524494 | 7.3772  | 9.3809  | -0.6401 |
| CEU | TBC1D3 | 121529494 | 8.6537  | 10.5749 | -0.5489 |
| CEU | TBC1D3 | 121534494 | 11.4673 | 10.916  | 0.1529  |
| CEU | TBC1D3 | 121539494 | 8.8176  | 9.5515  | -0.2306 |
| CEU | TBC1D3 | 121544494 | 4.5694  | 7.8459  | -1.2343 |
| CEU | TBC1D3 | 121549494 | 3.6926  | 8.5281  | -1.6872 |
| CEU | TBC1D3 | 121554494 | 3.3096  | 10.2337 | -2.0399 |
| CEU | TBC1D3 | 121559494 | 2.5657  | 7.6753  | -1.964  |
| CEU | TBC1D3 | 121564494 | 1.9388  | 5.6286  | -1.8769 |
| CEU | TBC1D3 | 121569494 | 2.6279  | 8.0164  | -1.9903 |
| CEU | TBC1D3 | 121574494 | 4.3663  | 11.5982 | -1.8948 |
| CEU | TBC1D3 | 121579494 | 5.2492  | 14.3272 | -1.9477 |
| CEU | TBC1D3 | 121584494 | 5.3245  | 15.8623 | -2.052  |
| CEU | TBC1D3 | 121589494 | 6.2488  | 18.4207 | -2.0539 |
| CEU | TBC1D3 | 121594494 | 5.5631  | 16.0329 | -2.018  |
| CEU | TBC1D3 | 121599494 | 4.9846  | 11.9394 | -1.7732 |
| CEU | TBC1D3 | 121604494 | 4.6487  | 12.7922 | -1.9454 |
| CEU | TBC1D3 | 121609494 | 5.4032  | 19.4441 | -2.2492 |
| CEU | TBC1D3 | 121614494 | 5.3346  | 18.9324 | -2.2348 |
| CEU | TBC1D3 | 121619494 | 3.1156  | 11.0866 | -2.1789 |
| CEU | TBC1D3 | 121624494 | 4.6638  | 10.4043 | -1.6653 |
| CEU | TBC1D3 | 121629494 | 5.0144  | 11.2571 | -1.6822 |
| CEU | TBC1D3 | 121634494 | 2.8545  | 10.2337 | -2.174  |
| CEU | TBC1D3 | 121639494 | 3.6856  | 11.5982 | -2.0732 |
| CEU | TBC1D3 | 121644494 | 3.2777  | 10.7454 | -2.1019 |
| CEU | TBC1D3 | 121649494 | 3.746   | 10.2337 | -1.9113 |
| CEU | TBC1D3 | 121654494 | 5.0551  | 11.4277 | -1.6931 |
| CEU | TBC1D3 | 121659494 | 4.3885  | 10.0632 | -1.6982 |
| CEU | TBC1D3 | 121664494 | 4.6028  | 10.916  | -1.751  |
| CEU | TBC1D3 | 121669494 | 6.0332  | 12.7922 | -1.6146 |
| CEU | TBC1D3 | 121674494 | 8.7868  | 13.3039 | -1.0398 |
| CEU | TBC1D3 | 121679494 | 8.8557  | 12.1099 | -0.8187 |
| CEU | TBC1D3 | 121684494 | 6.4139  | 10.7454 | -1.2192 |
| CEU | TBC1D3 | 121689494 | 3.6937  | 7.5047  | -1.4953 |
| CEU | TBC1D3 | 121694494 | 5.9101  | 7.5047  | -0.6256 |
| CEU | TBC1D3 | 121699494 | 10.7208 | 11.2571 | -0.1445 |
| CEU | TBC1D3 | 121704494 | 10.5783 | 10.916  | -0.0937 |
| CEU | TBC1D3 | 121709494 | 8.1861  | 9.8926  | -0.5189 |
| CEU | TBC1D3 | 121714494 | 7.4007  | 9.8926  | -0.7577 |
| CEU | TBC1D3 | 121719494 | 7.9465  | 9.0398  | -0.3615 |
| CEU | TBC1D3 | 121724494 | 9.1203  | 9.5515  | -0.1355 |
| CEU | TBC1D3 | 121729494 | 13.3469 | 13.3039 | 0.0099  |
| CEU | TBC1D3 | 121734494 | 15.5518 | 13.8156 | 0.3856  |
| CEU | TBC1D3 | 121739494 | 17.6437 | 12.7922 | 1.159   |
| CEU | TBC1D3 | 121744494 | 15.0347 | 12.4511 | 0.6331  |
| CEU | TBC1D3 | 121749494 | 8.6586  | 10.4043 | -0.5064 |

## 2\_TajimasD\_data

|     |        |           |         |         |         |
|-----|--------|-----------|---------|---------|---------|
| CEU | TBC1D3 | 121754494 | 7.1835  | 10.2337 | -0.8986 |
| CEU | TBC1D3 | 121759494 | 5.6726  | 8.8692  | -1.0757 |
| CEU | TBC1D3 | 121764494 | 4.7141  | 7.1636  | -1.0027 |
| CEU | TBC1D3 | 121769494 | 8.3463  | 8.0164  | 0.1219  |
| CEU | TBC1D3 | 121774494 | 12.5828 | 9.0398  | 1.1714  |
| CEU | TBC1D3 | 121779494 | 19.8064 | 11.7688 | 2.0772  |
| CEU | TBC1D3 | 121784494 | 22.3492 | 12.6216 | 2.3535  |
| CEU | TBC1D3 | 121789494 | 19.5865 | 11.5982 | 2.093   |
| CEU | TBC1D3 | 121794494 | 20.1866 | 11.9394 | 2.1027  |
| CEU | TBC1D3 | 121799494 | 17.5426 | 11.0866 | 1.7647  |
| CEU | TBC1D3 | 121804494 | 14.1315 | 10.4043 | 1.0812  |
| CEU | TBC1D3 | 121809494 | 11.5935 | 9.3809  | 0.7068  |
| CEU | TBC1D3 | 121814494 | 11.4187 | 9.8926  | 0.464   |
| CEU | TBC1D3 | 121819494 | 16.2744 | 11.0866 | 1.4181  |
| CEU | TBC1D3 | 121824494 | 15.1251 | 9.5515  | 1.751   |
| CEU | TBC1D3 | 121829494 | 12.2498 | 9.2104  | 0.9876  |
| CHB | TBC1D3 | 120584494 | 12.2265 | 11.6896 | 0.1392  |
| CHB | TBC1D3 | 120589494 | 14.8497 | 12.7061 | 0.5139  |
| CHB | TBC1D3 | 120594494 | 7.7026  | 7.7931  | -0.0342 |
| CHB | TBC1D3 | 120599494 | 5.414   | 6.2684  | -0.3935 |
| CHB | TBC1D3 | 120604494 | 5.8426  | 7.9625  | -0.7856 |
| CHB | TBC1D3 | 120609494 | 5.1504  | 8.1319  | -1.0837 |
| CHB | TBC1D3 | 120614494 | 5.7872  | 8.1319  | -0.8522 |
| CHB | TBC1D3 | 120619494 | 7.0398  | 7.4543  | -0.1632 |
| CHB | TBC1D3 | 120624494 | 6.7995  | 9.3178  | -0.8072 |
| CHB | TBC1D3 | 120629494 | 8.5814  | 14.0615 | -1.1934 |
| CHB | TBC1D3 | 120634494 | 11.7127 | 14.7391 | -0.6302 |
| CHB | TBC1D3 | 120639494 | 13.2056 | 16.4333 | -0.6059 |
| CHB | TBC1D3 | 120644494 | 16.5026 | 15.4168 | 0.2166  |
| CHB | TBC1D3 | 120649494 | 14.9219 | 10.6731 | 1.2     |
| CHB | TBC1D3 | 120654494 | 12.4742 | 11.1814 | 0.3496  |
| CHB | TBC1D3 | 120659494 | 15.613  | 12.8755 | 0.6481  |
| CHB | TBC1D3 | 120664494 | 13.6035 | 10.8426 | 0.7684  |
| CHB | TBC1D3 | 120669494 | 10.0409 | 8.6402  | 0.4815  |
| CHB | TBC1D3 | 120674494 | 9.6651  | 8.1319  | 0.5573  |
| CHB | TBC1D3 | 120679494 | 11.8474 | 9.9955  | 0.5561  |
| CHB | TBC1D3 | 120684494 | 12.6462 | 11.8591 | 0.2014  |
| CHB | TBC1D3 | 120689494 | 9.201   | 10.6731 | -0.4158 |
| CHB | TBC1D3 | 120694494 | 6.0571  | 7.4543  | -0.55   |
| CHB | TBC1D3 | 120699494 | 5.5942  | 5.0825  | 0.2841  |
| CHB | TBC1D3 | 120704494 | 6.183   | 5.7601  | 0.2101  |
| CHB | TBC1D3 | 120709494 | 6.6057  | 5.9295  | 0.3274  |
| CHB | TBC1D3 | 120714494 | 8.2142  | 6.6072  | 0.7058  |
| CHB | TBC1D3 | 120719494 | 9.4559  | 8.6402  | 0.2804  |
| CHB | TBC1D3 | 120724494 | 9.6585  | 8.3013  | 0.484   |
| CHB | TBC1D3 | 120729494 | 14.083  | 10.6731 | 0.9631  |
| CHB | TBC1D3 | 120734494 | 17.6738 | 13.2144 | 1.0301  |
| CHB | TBC1D3 | 120739494 | 15.8031 | 11.5202 | 1.126   |
| CHB | TBC1D3 | 120744494 | 13.1241 | 11.1814 | 0.5253  |

## 2\_TajimasD\_data

|     |        |           |         |         |         |
|-----|--------|-----------|---------|---------|---------|
| CHB | TBC1D3 | 120749494 | 14.5715 | 13.892  | 0.1497  |
| CHB | TBC1D3 | 120754494 | 19.8582 | 16.0944 | 0.7207  |
| CHB | TBC1D3 | 120759494 | 19.4727 | 13.892  | 1.2294  |
| CHB | TBC1D3 | 120764494 | 13.6739 | 12.3673 | 0.3213  |
| CHB | TBC1D3 | 120769494 | 12.4318 | 11.8591 | 0.1465  |
| CHB | TBC1D3 | 120774494 | 15.6227 | 11.1814 | 1.2009  |
| CHB | TBC1D3 | 120779494 | 16.1211 | 12.1979 | 0.9774  |
| CHB | TBC1D3 | 120784494 | 24.1512 | 21.8545 | 0.3278  |
| CHB | TBC1D3 | 120789494 | 22.1888 | 22.1934 | -0.0006 |
| CHB | TBC1D3 | 120794494 | 13.1757 | 15.5862 | -0.476  |
| CHB | TBC1D3 | 120799494 | 14.7162 | 16.2638 | -0.2934 |
| CHB | TBC1D3 | 120804494 | 12.2456 | 12.1979 | 0.0119  |
| CHB | TBC1D3 | 120809494 | 9.7961  | 12.3673 | -0.6323 |
| CHB | TBC1D3 | 120814494 | 10.3284 | 15.7556 | -1.0606 |
| CHB | TBC1D3 | 120819494 | 8.0857  | 12.5367 | -1.0806 |
| CHB | TBC1D3 | 120824494 | 6.7717  | 9.9955  | -0.968  |
| CHB | TBC1D3 | 120829494 | 8.1492  | 11.012  | -0.7852 |
| CHB | TBC1D3 | 120834494 | 8.6434  | 10.8426 | -0.612  |
| CHB | TBC1D3 | 120839494 | 13.2579 | 14.4003 | -0.2432 |
| CHB | TBC1D3 | 120844494 | 14.2932 | 16.6027 | -0.4293 |
| CHB | TBC1D3 | 120849494 | 16.9256 | 16.0944 | 0.1592  |
| CHB | TBC1D3 | 120854494 | 21.1374 | 16.2638 | 0.924   |
| CHB | TBC1D3 | 120859494 | 17.9933 | 16.6027 | 0.2585  |
| CHB | TBC1D3 | 120864494 | 15.9911 | 16.2638 | -0.0517 |
| CHB | TBC1D3 | 120869494 | 12.5424 | 13.045  | -0.1175 |
| CHB | TBC1D3 | 120874494 | 12.36   | 13.045  | -0.1602 |
| CHB | TBC1D3 | 120879494 | 12.6143 | 13.5532 | -0.2117 |
| CHB | TBC1D3 | 120884494 | 10.5416 | 11.5202 | -0.2573 |
| CHB | TBC1D3 | 120889494 | 11.1319 | 9.9955  | 0.3412  |
| CHB | TBC1D3 | 120894494 | 13.3029 | 11.3508 | 0.5204  |
| CHB | TBC1D3 | 120899494 | 12.2065 | 14.5697 | -0.4976 |
| CHB | TBC1D3 | 120904494 | 9.2393  | 13.892  | -1.025  |
| CHB | TBC1D3 | 120909494 | 9.2747  | 11.5202 | -0.5904 |
| CHB | TBC1D3 | 120914494 | 8.3942  | 9.9955  | -0.4808 |
| CHB | TBC1D3 | 120919494 | 7.7144  | 9.1484  | -0.4675 |
| CHB | TBC1D3 | 120924494 | 7.8332  | 10.8426 | -0.8375 |
| CHB | TBC1D3 | 120929494 | 8.6562  | 11.8591 | -0.8194 |
| CHB | TBC1D3 | 120934494 | 8.9802  | 12.1979 | -0.8017 |
| CHB | TBC1D3 | 120939494 | 9.3343  | 11.1814 | -0.4994 |
| CHB | TBC1D3 | 120944494 | 8.9968  | 8.1319  | 0.3144  |
| CHB | TBC1D3 | 120949494 | 10.4441 | 9.6567  | 0.2442  |
| CHB | TBC1D3 | 120954494 | 19.489  | 17.6192 | 0.3283  |
| CHB | TBC1D3 | 120959494 | 29.5609 | 25.7511 | 0.4638  |
| CHB | TBC1D3 | 120964494 | 33.1032 | 25.0734 | 1.0031  |
| CHB | TBC1D3 | 120969494 | 25.5456 | 18.1274 | 1.2676  |
| CHB | TBC1D3 | 120974494 | 15.3861 | 14.4003 | 0.2099  |
| CHB | TBC1D3 | 120979494 | 12.5618 | 13.5532 | -0.2236 |
| CHB | TBC1D3 | 120984494 | 11.9808 | 12.5367 | -0.135  |
| CHB | TBC1D3 | 120989494 | 12.3684 | 12.3673 | 0.0003  |



## 2\_TajimasD\_data

|     |        |           |         |         |         |
|-----|--------|-----------|---------|---------|---------|
| CHB | TBC1D3 | 120994494 | 9.6507  | 11.3508 | -0.4532 |
| CHB | TBC1D3 | 120999494 | 9.0286  | 9.8261  | -0.2433 |
| CHB | TBC1D3 | 121004494 | 12.7596 | 12.3673 | 0.0965  |
| CHB | TBC1D3 | 121009494 | 13.5818 | 12.8755 | 0.1672  |
| CHB | TBC1D3 | 121014494 | 10.7704 | 9.6567  | 0.3453  |
| CHB | TBC1D3 | 121019494 | 8.139   | 8.979   | -0.2787 |
| CHB | TBC1D3 | 121024494 | 11.4662 | 11.1814 | 0.077   |
| CHB | TBC1D3 | 121029494 | 14.1424 | 10.8426 | 0.9183  |
| CHB | TBC1D3 | 121034494 | 11.7415 | 8.8096  | 0.9899  |
| CHB | TBC1D3 | 121039494 | 10.5003 | 10.1649 | 0.0991  |
| CHB | TBC1D3 | 121044494 | 14.842  | 15.925  | -0.2095 |
| CHB | TBC1D3 | 121049494 | 16.2187 | 15.4168 | 0.16    |
| CHB | TBC1D3 | 121054494 | 15.6524 | 11.6896 | 1.0277  |
| CHB | TBC1D3 | 121059494 | 13.7293 | 11.1814 | 0.6889  |
| CHB | TBC1D3 | 121064494 | 8.0545  | 12.1979 | -1.0323 |
| CHB | TBC1D3 | 121069494 | 9.3544  | 18.4662 | -1.5295 |
| CHB | TBC1D3 | 121074494 | 12.0899 | 20.3298 | -1.2609 |
| CHB | TBC1D3 | 121079494 | 9.3872  | 16.2638 | -1.3037 |
| CHB | TBC1D3 | 121084494 | 10.4096 | 12.8755 | -0.5838 |
| CHB | TBC1D3 | 121089494 | 11.1024 | 11.012  | 0.0248  |
| CHB | TBC1D3 | 121094494 | 8.097   | 9.9955  | -0.5701 |
| CHB | TBC1D3 | 121099494 | 8.3333  | 10.5037 | -0.6222 |
| CHB | TBC1D3 | 121104494 | 8.3124  | 9.3178  | -0.3223 |
| CHB | TBC1D3 | 121109494 | 7.3303  | 8.3013  | -0.3463 |
| CHB | TBC1D3 | 121114494 | 6.7653  | 9.6567  | -0.8966 |
| CHB | TBC1D3 | 121119494 | 9.6564  | 9.9955  | -0.1018 |
| CHB | TBC1D3 | 121124494 | 12.25   | 10.8426 | 0.3917  |
| CHB | TBC1D3 | 121129494 | 9.3084  | 11.8591 | -0.6526 |
| CHB | TBC1D3 | 121134494 | 7.4184  | 12.3673 | -1.217  |
| CHB | TBC1D3 | 121139494 | 10.6035 | 14.7391 | -0.8612 |
| CHB | TBC1D3 | 121144494 | 13.1256 | 14.7391 | -0.336  |
| CHB | TBC1D3 | 121149494 | 12.5475 | 11.5202 | 0.2701  |
| CHB | TBC1D3 | 121154494 | 14.5711 | 10.8426 | 1.0377  |
| CHB | TBC1D3 | 121159494 | 17.9438 | 12.0285 | 1.4933  |
| CHB | TBC1D3 | 121164494 | 17.2606 | 11.8591 | 1.3819  |
| CHB | TBC1D3 | 121169494 | 13.3773 | 12.0285 | 0.3405  |
| CHB | TBC1D3 | 121174494 | 13.1934 | 12.0285 | 0.2941  |
| CHB | TBC1D3 | 121179494 | 12.5382 | 9.8261  | 0.8275  |
| CHB | TBC1D3 | 121184494 | 13.2322 | 10.6731 | 0.7228  |
| CHB | TBC1D3 | 121189494 | 14.7398 | 13.3838 | 0.3095  |
| CHB | TBC1D3 | 121194494 | 12.9126 | 13.2144 | -0.0697 |
| CHB | TBC1D3 | 121199494 | 7.9526  | 10.1649 | -0.654  |
| CHB | TBC1D3 | 121204494 | 5.1485  | 8.8096  | -1.2361 |
| CHB | TBC1D3 | 121209494 | 7.7756  | 9.3178  | -0.4943 |
| CHB | TBC1D3 | 121214494 | 11.177  | 11.5202 | -0.0902 |
| CHB | TBC1D3 | 121219494 | 12.1043 | 12.8755 | -0.1826 |
| CHB | TBC1D3 | 121224494 | 8.5953  | 9.9955  | -0.4205 |
| CHB | TBC1D3 | 121229494 | 6.1529  | 8.8096  | -0.897  |
| CHB | TBC1D3 | 121234494 | 6.2029  | 8.3013  | -0.7484 |

## 2\_TajimasD\_data

|     |        |           |         |         |         |
|-----|--------|-----------|---------|---------|---------|
| CHB | TBC1D3 | 121239494 | 7.7611  | 8.4708  | -0.2484 |
| CHB | TBC1D3 | 121244494 | 11.0386 | 11.3508 | -0.0832 |
| CHB | TBC1D3 | 121249494 | 14.7627 | 17.6192 | -0.5016 |
| CHB | TBC1D3 | 121254494 | 11.6991 | 15.7556 | -0.7927 |
| CHB | TBC1D3 | 121259494 | 8.7438  | 10.5037 | -0.5046 |
| CHB | TBC1D3 | 121264494 | 8.9023  | 11.1814 | -0.6162 |
| CHB | TBC1D3 | 121269494 | 7.8683  | 11.3508 | -0.9284 |
| CHB | TBC1D3 | 121274494 | 8.5932  | 12.1979 | -0.8981 |
| CHB | TBC1D3 | 121279494 | 7.4533  | 10.3343 | -0.8386 |
| CHB | TBC1D3 | 121284494 | 7.8149  | 10.8426 | -0.8426 |
| CHB | TBC1D3 | 121289494 | 8.1642  | 12.3673 | -1.0336 |
| CHB | TBC1D3 | 121294494 | 4.8843  | 8.4708  | -1.2555 |
| CHB | TBC1D3 | 121299494 | 5.9943  | 8.1319  | -0.777  |
| CHB | TBC1D3 | 121304494 | 9.4826  | 11.6896 | -0.5723 |
| CHB | TBC1D3 | 121309494 | 8.9536  | 11.6896 | -0.7095 |
| CHB | TBC1D3 | 121314494 | 8.2185  | 11.8591 | -0.9314 |
| CHB | TBC1D3 | 121319494 | 10.6736 | 12.1979 | -0.3798 |
| CHB | TBC1D3 | 121324494 | 9.4574  | 10.3343 | -0.2553 |
| CHB | TBC1D3 | 121329494 | 8.1614  | 9.8261  | -0.5079 |
| CHB | TBC1D3 | 121334494 | 10.1069 | 11.5202 | -0.3716 |
| CHB | TBC1D3 | 121339494 | 9.3494  | 12.0285 | -0.6763 |
| CHB | TBC1D3 | 121344494 | 9.2258  | 11.6896 | -0.6389 |
| CHB | TBC1D3 | 121349494 | 9.2947  | 12.1979 | -0.7233 |
| CHB | TBC1D3 | 121354494 | 7.3541  | 11.5202 | -1.0953 |
| CHB | TBC1D3 | 121359494 | 7.7443  | 11.3508 | -0.9615 |
| CHB | TBC1D3 | 121364494 | 10.0055 | 12.7061 | -0.6474 |
| CHB | TBC1D3 | 121369494 | 10.6741 | 12.3673 | -0.4164 |
| CHB | TBC1D3 | 121374494 | 9.2886  | 11.8591 | -0.6576 |
| CHB | TBC1D3 | 121379494 | 8.3564  | 12.3673 | -0.9864 |
| CHB | TBC1D3 | 121384494 | 7.3878  | 10.8426 | -0.9615 |
| CHB | TBC1D3 | 121389494 | 7.0004  | 11.3508 | -1.1598 |
| CHB | TBC1D3 | 121394494 | 7.6128  | 11.6896 | -1.0572 |
| CHB | TBC1D3 | 121399494 | 6.6922  | 11.1814 | -1.2138 |
| CHB | TBC1D3 | 121404494 | 6.3613  | 12.8755 | -1.5422 |
| CHB | TBC1D3 | 121409494 | 5.1816  | 9.3178  | -1.3258 |
| CHB | TBC1D3 | 121414494 | 7.6122  | 9.9955  | -0.7157 |
| CHB | TBC1D3 | 121419494 | 10.031  | 15.0779 | -1.0285 |
| CHB | TBC1D3 | 121424494 | 7.1557  | 12.5367 | -1.3064 |
| CHB | TBC1D3 | 121429494 | 4.8212  | 9.8261  | -1.527  |
| CHB | TBC1D3 | 121434494 | 4.0091  | 9.3178  | -1.7016 |
| CHB | TBC1D3 | 121439494 | 5.9299  | 10.1649 | -1.2519 |
| CHB | TBC1D3 | 121444494 | 6.1245  | 10.3343 | -1.2254 |
| CHB | TBC1D3 | 121449494 | 4.3368  | 8.4708  | -1.4472 |
| CHB | TBC1D3 | 121454494 | 5.5524  | 9.4872  | -1.2403 |
| CHB | TBC1D3 | 121459494 | 6.6897  | 11.6896 | -1.2966 |
| CHB | TBC1D3 | 121464494 | 5.8772  | 10.6731 | -1.3545 |
| CHB | TBC1D3 | 121469494 | 7.1379  | 9.4872  | -0.7405 |
| CHB | TBC1D3 | 121474494 | 9.4975  | 11.8591 | -0.6042 |
| CHB | TBC1D3 | 121479494 | 10.2334 | 14.5697 | -0.913  |

## 2\_TajimasD\_data

|     |        |           |         |         |         |
|-----|--------|-----------|---------|---------|---------|
| CHB | TBC1D3 | 121484494 | 5.9046  | 8.3013  | -0.8548 |
| CHB | TBC1D3 | 121489494 | 6.1152  | 6.4378  | -0.1451 |
| CHB | TBC1D3 | 121494494 | 9.9128  | 11.8591 | -0.4979 |
| CHB | TBC1D3 | 121499494 | 9.2758  | 12.8755 | -0.8522 |
| CHB | TBC1D3 | 121504494 | 7.9103  | 12.1979 | -1.0682 |
| CHB | TBC1D3 | 121509494 | 7.0383  | 10.1649 | -0.9243 |
| CHB | TBC1D3 | 121514494 | 9.2757  | 10.8426 | -0.4361 |
| CHB | TBC1D3 | 121519494 | 10.343  | 11.3508 | -0.2687 |
| CHB | TBC1D3 | 121524494 | 8.1496  | 9.8261  | -0.5115 |
| CHB | TBC1D3 | 121529494 | 9.5041  | 10.5037 | -0.2866 |
| CHB | TBC1D3 | 121534494 | 11.7777 | 12.0285 | -0.0633 |
| CHB | TBC1D3 | 121539494 | 8.5852  | 10.1649 | -0.467  |
| CHB | TBC1D3 | 121544494 | 7.0999  | 9.1484  | -0.6679 |
| CHB | TBC1D3 | 121549494 | 7.8064  | 10.8426 | -0.845  |
| CHB | TBC1D3 | 121554494 | 7.8014  | 10.3343 | -0.7373 |
| CHB | TBC1D3 | 121559494 | 5.0487  | 7.7931  | -1.0372 |
| CHB | TBC1D3 | 121564494 | 2.5759  | 6.946   | -1.8344 |
| CHB | TBC1D3 | 121569494 | 5.3582  | 10.5037 | -1.4752 |
| CHB | TBC1D3 | 121574494 | 8.3542  | 14.0615 | -1.2429 |
| CHB | TBC1D3 | 121579494 | 9.5043  | 14.2309 | -1.0177 |
| CHB | TBC1D3 | 121584494 | 13.2538 | 18.8051 | -0.9157 |
| CHB | TBC1D3 | 121589494 | 17.1303 | 24.2264 | -0.9165 |
| CHB | TBC1D3 | 121594494 | 14.366  | 21.1769 | -1.002  |
| CHB | TBC1D3 | 121599494 | 10.7902 | 15.2474 | -0.8987 |
| CHB | TBC1D3 | 121604494 | 10.4331 | 15.0779 | -0.9466 |
| CHB | TBC1D3 | 121609494 | 13.7164 | 21.3463 | -1.1139 |
| CHB | TBC1D3 | 121614494 | 13.4599 | 19.8216 | -0.9975 |
| CHB | TBC1D3 | 121619494 | 7.4241  | 12.7061 | -1.2662 |
| CHB | TBC1D3 | 121624494 | 8.6296  | 12.1979 | -0.889  |
| CHB | TBC1D3 | 121629494 | 9.3119  | 12.0285 | -0.6858 |
| CHB | TBC1D3 | 121634494 | 6.6646  | 10.8426 | -1.1628 |
| CHB | TBC1D3 | 121639494 | 7.8247  | 11.5202 | -0.9716 |
| CHB | TBC1D3 | 121644494 | 6.1898  | 11.1814 | -1.3497 |
| CHB | TBC1D3 | 121649494 | 7.1225  | 12.7061 | -1.3385 |
| CHB | TBC1D3 | 121654494 | 9.6212  | 16.6027 | -1.2977 |
| CHB | TBC1D3 | 121659494 | 8.877   | 18.1274 | -1.5806 |
| CHB | TBC1D3 | 121664494 | 9.7711  | 16.7721 | -1.2888 |
| CHB | TBC1D3 | 121669494 | 11.0128 | 13.892  | -0.6343 |
| CHB | TBC1D3 | 121674494 | 13.708  | 13.7226 | -0.0033 |
| CHB | TBC1D3 | 121679494 | 13.2658 | 14.0615 | -0.1733 |
| CHB | TBC1D3 | 121684494 | 9.3464  | 11.6896 | -0.6077 |
| CHB | TBC1D3 | 121689494 | 5.592   | 8.4708  | -1.0078 |
| CHB | TBC1D3 | 121694494 | 7.7628  | 9.8261  | -0.6295 |
| CHB | TBC1D3 | 121699494 | 13.9278 | 13.2144 | 0.1648  |
| CHB | TBC1D3 | 121704494 | 13.7673 | 11.6896 | 0.5388  |
| CHB | TBC1D3 | 121709494 | 8.7422  | 8.979   | -0.0786 |
| CHB | TBC1D3 | 121714494 | 7.1572  | 7.7931  | -0.2403 |
| CHB | TBC1D3 | 121719494 | 8.6697  | 7.1154  | 0.6383  |
| CHB | TBC1D3 | 121724494 | 11.0718 | 8.4708  | 0.9105  |

## 2\_TajimasD\_data

|     |        |           |         |         |         |
|-----|--------|-----------|---------|---------|---------|
| CHB | TBC1D3 | 121729494 | 16.7219 | 13.5532 | 0.7146  |
| CHB | TBC1D3 | 121734494 | 18.3813 | 14.4003 | 0.8476  |
| CHB | TBC1D3 | 121739494 | 19.1935 | 14.4003 | 1.0205  |
| CHB | TBC1D3 | 121744494 | 17.1838 | 14.7391 | 0.5091  |
| CHB | TBC1D3 | 121749494 | 11.8911 | 11.8591 | 0.0082  |
| CHB | TBC1D3 | 121754494 | 11.3995 | 11.5202 | -0.0317 |
| CHB | TBC1D3 | 121759494 | 9.2761  | 10.1649 | -0.2627 |
| CHB | TBC1D3 | 121764494 | 5.2236  | 7.1154  | -0.7769 |
| CHB | TBC1D3 | 121769494 | 7.1219  | 9.1484  | -0.6607 |
| CHB | TBC1D3 | 121774494 | 12.7202 | 11.8591 | 0.2203  |
| CHB | TBC1D3 | 121779494 | 20.8291 | 14.0615 | 1.4738  |
| CHB | TBC1D3 | 121784494 | 22.3052 | 14.9085 | 1.5237  |
| CHB | TBC1D3 | 121789494 | 18.5507 | 13.5532 | 1.127   |
| CHB | TBC1D3 | 121794494 | 19.6303 | 14.0615 | 1.2128  |
| CHB | TBC1D3 | 121799494 | 17.3276 | 13.2144 | 0.9501  |
| CHB | TBC1D3 | 121804494 | 12.882  | 11.3508 | 0.4082  |
| CHB | TBC1D3 | 121809494 | 9.5049  | 8.979   | 0.1745  |
| CHB | TBC1D3 | 121814494 | 10.6166 | 10.3343 | 0.0822  |
| CHB | TBC1D3 | 121819494 | 16.383  | 13.5532 | 0.6382  |
| CHB | TBC1D3 | 121824494 | 14.4851 | 13.045  | 0.3367  |
| CHB | TBC1D3 | 121829494 | 11.8603 | 11.8591 | 0.0003  |
| YRI | TBC1D3 | 120584494 | 20.9162 | 22.3523 | -0.1999 |
| YRI | TBC1D3 | 120589494 | 22.898  | 25.8816 | -0.3602 |
| YRI | TBC1D3 | 120594494 | 11.6156 | 18.823  | -1.1838 |
| YRI | TBC1D3 | 120599494 | 7.8228  | 14.4534 | -1.402  |
| YRI | TBC1D3 | 120604494 | 8.3371  | 13.7811 | -1.2044 |
| YRI | TBC1D3 | 120609494 | 7.9288  | 15.1256 | -1.4573 |
| YRI | TBC1D3 | 120614494 | 8.1082  | 13.9492 | -1.2774 |
| YRI | TBC1D3 | 120619494 | 8.3657  | 12.2685 | -0.9638 |
| YRI | TBC1D3 | 120624494 | 9.1319  | 15.6298 | -1.2753 |
| YRI | TBC1D3 | 120629494 | 14.5697 | 19.4952 | -0.7821 |
| YRI | TBC1D3 | 120634494 | 18.5434 | 20.6717 | -0.3194 |
| YRI | TBC1D3 | 120639494 | 20.8172 | 23.5287 | -0.3591 |
| YRI | TBC1D3 | 120644494 | 21.1632 | 21.8481 | -0.0974 |
| YRI | TBC1D3 | 120649494 | 15.7542 | 15.7978 | -0.0085 |
| YRI | TBC1D3 | 120654494 | 17.496  | 19.4952 | -0.3175 |
| YRI | TBC1D3 | 120659494 | 21.9254 | 23.1926 | -0.1702 |
| YRI | TBC1D3 | 120664494 | 15.9337 | 19.9994 | -0.6299 |
| YRI | TBC1D3 | 120669494 | 11.4734 | 18.3188 | -1.154  |
| YRI | TBC1D3 | 120674494 | 11.0627 | 15.7978 | -0.9199 |
| YRI | TBC1D3 | 120679494 | 13.8383 | 16.8062 | -0.5434 |
| YRI | TBC1D3 | 120684494 | 15.5361 | 18.3188 | -0.4691 |
| YRI | TBC1D3 | 120689494 | 12.6217 | 17.9827 | -0.92   |
| YRI | TBC1D3 | 120694494 | 9.355   | 14.6214 | -1.1014 |
| YRI | TBC1D3 | 120699494 | 7.5234  | 13.2769 | -1.3186 |
| YRI | TBC1D3 | 120704494 | 8.8058  | 16.4701 | -1.4308 |
| YRI | TBC1D3 | 120709494 | 8.9217  | 16.6382 | -1.4266 |
| YRI | TBC1D3 | 120714494 | 9.1546  | 16.6382 | -1.3835 |
| YRI | TBC1D3 | 120719494 | 11.0388 | 17.6465 | -1.1547 |

## 2\_TajimasD\_data

|     |        |           |         |         |         |
|-----|--------|-----------|---------|---------|---------|
| YRI | TBC1D3 | 120724494 | 11.2687 | 18.1507 | -1.1705 |
| YRI | TBC1D3 | 120729494 | 15.0517 | 17.1423 | -0.3756 |
| YRI | TBC1D3 | 120734494 | 19.7804 | 18.3188 | 0.2464  |
| YRI | TBC1D3 | 120739494 | 16.591  | 17.8146 | -0.2119 |
| YRI | TBC1D3 | 120744494 | 12.6372 | 17.4785 | -0.8538 |
| YRI | TBC1D3 | 120749494 | 14.2876 | 20.1675 | -0.9037 |
| YRI | TBC1D3 | 120754494 | 20.5423 | 24.201  | -0.4715 |
| YRI | TBC1D3 | 120759494 | 19.33   | 21.8481 | -0.3582 |
| YRI | TBC1D3 | 120764494 | 12.4875 | 16.4701 | -0.7435 |
| YRI | TBC1D3 | 120769494 | 13.6137 | 15.6298 | -0.3957 |
| YRI | TBC1D3 | 120774494 | 17.7096 | 16.6382 | 0.1981  |
| YRI | TBC1D3 | 120779494 | 19.1175 | 18.1507 | 0.1644  |
| YRI | TBC1D3 | 120784494 | 30.3597 | 29.2428 | 0.1197  |
| YRI | TBC1D3 | 120789494 | 30.9798 | 32.7721 | -0.1719 |
| YRI | TBC1D3 | 120794494 | 20.8897 | 24.5371 | -0.4637 |
| YRI | TBC1D3 | 120799494 | 21.4831 | 22.6884 | -0.1653 |
| YRI | TBC1D3 | 120804494 | 17.2021 | 17.8146 | -0.1061 |
| YRI | TBC1D3 | 120809494 | 8.7899  | 14.7895 | -1.2411 |
| YRI | TBC1D3 | 120814494 | 6.4864  | 17.1423 | -1.9145 |
| YRI | TBC1D3 | 120819494 | 6.9345  | 14.7895 | -1.625  |
| YRI | TBC1D3 | 120824494 | 7.5651  | 13.445  | -1.3316 |
| YRI | TBC1D3 | 120829494 | 7.8339  | 15.2937 | -1.4947 |
| YRI | TBC1D3 | 120834494 | 6.8472  | 13.1089 | -1.4525 |
| YRI | TBC1D3 | 120839494 | 9.2657  | 16.6382 | -1.363  |
| YRI | TBC1D3 | 120844494 | 13.1393 | 20.5036 | -1.1139 |
| YRI | TBC1D3 | 120849494 | 20.816  | 22.1842 | -0.1918 |
| YRI | TBC1D3 | 120854494 | 23.1293 | 22.5203 | 0.0841  |
| YRI | TBC1D3 | 120859494 | 21.7904 | 19.3272 | 0.3944  |
| YRI | TBC1D3 | 120864494 | 25.4128 | 17.3104 | 1.4422  |
| YRI | TBC1D3 | 120869494 | 22.831  | 16.8062 | 1.1032  |
| YRI | TBC1D3 | 120874494 | 18.5293 | 17.6465 | 0.1543  |
| YRI | TBC1D3 | 120879494 | 15.5161 | 18.6549 | -0.52   |
| YRI | TBC1D3 | 120884494 | 15.5494 | 18.4868 | -0.4909 |
| YRI | TBC1D3 | 120889494 | 15.4095 | 16.6382 | -0.2272 |
| YRI | TBC1D3 | 120894494 | 15.6908 | 17.9827 | -0.3933 |
| YRI | TBC1D3 | 120899494 | 19.2663 | 18.6549 | 0.1013  |
| YRI | TBC1D3 | 120904494 | 16.9715 | 15.1256 | 0.3738  |
| YRI | TBC1D3 | 120909494 | 11.7556 | 12.2685 | -0.1267 |
| YRI | TBC1D3 | 120914494 | 8.9945  | 12.2685 | -0.8085 |
| YRI | TBC1D3 | 120919494 | 8.9815  | 13.9492 | -1.0864 |
| YRI | TBC1D3 | 120924494 | 10.2543 | 14.1172 | -0.8353 |
| YRI | TBC1D3 | 120929494 | 9.0471  | 12.7727 | -0.8857 |
| YRI | TBC1D3 | 120934494 | 10.4913 | 15.9659 | -1.0528 |
| YRI | TBC1D3 | 120939494 | 11.9109 | 15.1256 | -0.6509 |
| YRI | TBC1D3 | 120944494 | 10.2643 | 12.7727 | -0.5963 |
| YRI | TBC1D3 | 120949494 | 12.8536 | 13.9492 | -0.2396 |
| YRI | TBC1D3 | 120954494 | 25.4271 | 18.823  | 1.0847  |
| YRI | TBC1D3 | 120959494 | 45.1044 | 29.9151 | 1.5927  |
| YRI | TBC1D3 | 120964494 | 51.2285 | 30.0831 | 2.2052  |

## 2\_TajimasD\_data

|     |        |           |         |         |         |
|-----|--------|-----------|---------|---------|---------|
| YRI | TBC1D3 | 120969494 | 37.1509 | 21.3439 | 2.3001  |
| YRI | TBC1D3 | 120974494 | 22.055  | 17.4785 | 0.8071  |
| YRI | TBC1D3 | 120979494 | 17.0717 | 16.8062 | 0.0486  |
| YRI | TBC1D3 | 120984494 | 14.8773 | 15.1256 | -0.0503 |
| YRI | TBC1D3 | 120989494 | 14.4827 | 13.613  | 0.1947  |
| YRI | TBC1D3 | 120994494 | 12.3052 | 13.7811 | -0.3265 |
| YRI | TBC1D3 | 120999494 | 10.5742 | 14.1172 | -0.7661 |
| YRI | TBC1D3 | 121004494 | 15.6961 | 16.8062 | -0.2033 |
| YRI | TBC1D3 | 121009494 | 13.8784 | 18.1507 | -0.7267 |
| YRI | TBC1D3 | 121014494 | 9.0881  | 14.2853 | -1.1112 |
| YRI | TBC1D3 | 121019494 | 8.5537  | 12.1005 | -0.8873 |
| YRI | TBC1D3 | 121024494 | 10.5341 | 14.9575 | -0.9053 |
| YRI | TBC1D3 | 121029494 | 13.4759 | 16.6382 | -0.5846 |
| YRI | TBC1D3 | 121034494 | 10.4802 | 13.7811 | -0.7303 |
| YRI | TBC1D3 | 121039494 | 7.7859  | 12.4366 | -1.1338 |
| YRI | TBC1D3 | 121044494 | 13.1996 | 18.991  | -0.9431 |
| YRI | TBC1D3 | 121049494 | 14.5659 | 20.5036 | -0.8981 |
| YRI | TBC1D3 | 121054494 | 12.2556 | 16.6382 | -0.8102 |
| YRI | TBC1D3 | 121059494 | 11.4157 | 15.6298 | -0.8271 |
| YRI | TBC1D3 | 121064494 | 8.8888  | 14.6214 | -1.1989 |
| YRI | TBC1D3 | 121069494 | 13.7918 | 19.6633 | -0.9247 |
| YRI | TBC1D3 | 121074494 | 16.481  | 22.6884 | -0.8515 |
| YRI | TBC1D3 | 121079494 | 11.0729 | 18.991  | -1.2894 |
| YRI | TBC1D3 | 121084494 | 11.4579 | 16.9743 | -1.0005 |
| YRI | TBC1D3 | 121089494 | 11.4571 | 16.4701 | -0.9358 |
| YRI | TBC1D3 | 121094494 | 7.934   | 15.6298 | -1.5104 |
| YRI | TBC1D3 | 121099494 | 8.4683  | 15.1256 | -1.348  |
| YRI | TBC1D3 | 121104494 | 9.3283  | 13.2769 | -0.905  |
| YRI | TBC1D3 | 121109494 | 8.6128  | 12.7727 | -0.989  |
| YRI | TBC1D3 | 121114494 | 7.7298  | 12.9408 | -1.2236 |
| YRI | TBC1D3 | 121119494 | 9.7195  | 12.7727 | -0.7259 |
| YRI | TBC1D3 | 121124494 | 10.821  | 13.445  | -0.5943 |
| YRI | TBC1D3 | 121129494 | 7.9771  | 13.1089 | -1.1904 |
| YRI | TBC1D3 | 121134494 | 7.232   | 14.2853 | -1.5081 |
| YRI | TBC1D3 | 121139494 | 10.7408 | 18.3188 | -1.2775 |
| YRI | TBC1D3 | 121144494 | 12.234  | 17.6465 | -0.9458 |
| YRI | TBC1D3 | 121149494 | 10.4773 | 14.1172 | -0.787  |
| YRI | TBC1D3 | 121154494 | 14.1242 | 14.7895 | -0.1376 |
| YRI | TBC1D3 | 121159494 | 18.6011 | 14.4534 | 0.877   |
| YRI | TBC1D3 | 121164494 | 18.5732 | 14.9575 | 0.74    |
| YRI | TBC1D3 | 121169494 | 14.9223 | 15.4617 | -0.107  |
| YRI | TBC1D3 | 121174494 | 13.9521 | 14.2853 | -0.0712 |
| YRI | TBC1D3 | 121179494 | 12.4729 | 13.2769 | -0.1843 |
| YRI | TBC1D3 | 121184494 | 12.6564 | 13.613  | -0.2141 |
| YRI | TBC1D3 | 121189494 | 14.6758 | 14.7895 | -0.0235 |
| YRI | TBC1D3 | 121194494 | 13.3633 | 14.6214 | -0.2631 |
| YRI | TBC1D3 | 121199494 | 9.6358  | 11.4282 | -0.4732 |
| YRI | TBC1D3 | 121204494 | 6.2741  | 10.0837 | -1.1307 |
| YRI | TBC1D3 | 121209494 | 8.7496  | 11.0921 | -0.636  |

## 2\_TajimasD\_data

|     |        |           |         |         |         |
|-----|--------|-----------|---------|---------|---------|
| YRI | TBC1D3 | 121214494 | 11.4355 | 12.6047 | -0.2815 |
| YRI | TBC1D3 | 121219494 | 15.83   | 15.6298 | 0.0393  |
| YRI | TBC1D3 | 121224494 | 15.478  | 14.7895 | 0.1424  |
| YRI | TBC1D3 | 121229494 | 10.9785 | 13.613  | -0.5897 |
| YRI | TBC1D3 | 121234494 | 10.7863 | 12.7727 | -0.4722 |
| YRI | TBC1D3 | 121239494 | 12.4163 | 11.7644 | 0.1675  |
| YRI | TBC1D3 | 121244494 | 15.4201 | 15.2937 | 0.0253  |
| YRI | TBC1D3 | 121249494 | 22.6    | 24.0329 | -0.1859 |
| YRI | TBC1D3 | 121254494 | 20.5404 | 23.0245 | -0.3359 |
| YRI | TBC1D3 | 121259494 | 14.3747 | 16.6382 | -0.4185 |
| YRI | TBC1D3 | 121264494 | 13.8012 | 15.7978 | -0.3879 |
| YRI | TBC1D3 | 121269494 | 12.3981 | 14.1172 | -0.3717 |
| YRI | TBC1D3 | 121274494 | 12.7169 | 13.2769 | -0.1283 |
| YRI | TBC1D3 | 121279494 | 10.9267 | 12.2685 | -0.3314 |
| YRI | TBC1D3 | 121284494 | 12.1035 | 16.302  | -0.7915 |
| YRI | TBC1D3 | 121289494 | 12.3973 | 18.3188 | -0.9983 |
| YRI | TBC1D3 | 121294494 | 7.8268  | 13.445  | -1.2724 |
| YRI | TBC1D3 | 121299494 | 8.8649  | 13.613  | -1.0627 |
| YRI | TBC1D3 | 121304494 | 13.1848 | 16.9743 | -0.6873 |
| YRI | TBC1D3 | 121309494 | 14.6893 | 16.4701 | -0.3324 |
| YRI | TBC1D3 | 121314494 | 16.2783 | 15.1256 | 0.2334  |
| YRI | TBC1D3 | 121319494 | 18.6319 | 16.134  | 0.4756  |
| YRI | TBC1D3 | 121324494 | 15.8677 | 15.1256 | 0.1503  |
| YRI | TBC1D3 | 121329494 | 12.4343 | 13.2769 | -0.1931 |
| YRI | TBC1D3 | 121334494 | 13.7807 | 15.1256 | -0.2723 |
| YRI | TBC1D3 | 121339494 | 13.6114 | 15.6298 | -0.3961 |
| YRI | TBC1D3 | 121344494 | 13.5994 | 16.134  | -0.4826 |
| YRI | TBC1D3 | 121349494 | 12.8779 | 16.9743 | -0.743  |
| YRI | TBC1D3 | 121354494 | 12.0302 | 16.4701 | -0.8288 |
| YRI | TBC1D3 | 121359494 | 12.5595 | 15.6298 | -0.6026 |
| YRI | TBC1D3 | 121364494 | 13.9822 | 14.4534 | -0.0996 |
| YRI | TBC1D3 | 121369494 | 15.9689 | 15.9659 | 0.0006  |
| YRI | TBC1D3 | 121374494 | 14.031  | 15.7978 | -0.3432 |
| YRI | TBC1D3 | 121379494 | 14.3005 | 15.6298 | -0.2609 |
| YRI | TBC1D3 | 121384494 | 13.7776 | 14.4534 | -0.1429 |
| YRI | TBC1D3 | 121389494 | 15.3621 | 15.2937 | 0.0137  |
| YRI | TBC1D3 | 121394494 | 17.9704 | 16.8062 | 0.2132  |
| YRI | TBC1D3 | 121399494 | 14.4618 | 15.2937 | -0.1667 |
| YRI | TBC1D3 | 121404494 | 13.6079 | 17.9827 | -0.7508 |
| YRI | TBC1D3 | 121409494 | 12.2828 | 15.7978 | -0.6828 |
| YRI | TBC1D3 | 121414494 | 14.1268 | 15.6298 | -0.295  |
| YRI | TBC1D3 | 121419494 | 18.1409 | 19.6633 | -0.2398 |
| YRI | TBC1D3 | 121424494 | 14.5112 | 16.8062 | -0.4202 |
| YRI | TBC1D3 | 121429494 | 10.1829 | 12.2685 | -0.515  |
| YRI | TBC1D3 | 121434494 | 9.1944  | 10.4199 | -0.3528 |
| YRI | TBC1D3 | 121439494 | 12.1337 | 14.1172 | -0.4289 |
| YRI | TBC1D3 | 121444494 | 12.4777 | 15.1256 | -0.5362 |
| YRI | TBC1D3 | 121449494 | 9.5522  | 12.4366 | -0.7032 |
| YRI | TBC1D3 | 121454494 | 11.0852 | 14.7895 | -0.7663 |

## 2\_TajimasD\_data

|     |        |           |         |         |         |
|-----|--------|-----------|---------|---------|---------|
| YRI | TBC1D3 | 121459494 | 13.2255 | 16.302  | -0.58   |
| YRI | TBC1D3 | 121464494 | 13.0515 | 15.2937 | -0.4493 |
| YRI | TBC1D3 | 121469494 | 12.8513 | 16.9743 | -0.7478 |
| YRI | TBC1D3 | 121474494 | 13.7409 | 16.4701 | -0.5095 |
| YRI | TBC1D3 | 121479494 | 16.329  | 17.4785 | -0.2027 |
| YRI | TBC1D3 | 121484494 | 9.8159  | 10.5879 | -0.2189 |
| YRI | TBC1D3 | 121489494 | 7.551   | 8.5712  | -0.3521 |
| YRI | TBC1D3 | 121494494 | 15.4123 | 16.4701 | -0.1975 |
| YRI | TBC1D3 | 121499494 | 16.4271 | 16.4701 | -0.008  |
| YRI | TBC1D3 | 121504494 | 13.8227 | 15.2937 | -0.2947 |
| YRI | TBC1D3 | 121509494 | 12.5638 | 14.6214 | -0.4303 |
| YRI | TBC1D3 | 121514494 | 17.1275 | 17.4785 | -0.0619 |
| YRI | TBC1D3 | 121519494 | 17.9553 | 17.8146 | 0.0244  |
| YRI | TBC1D3 | 121524494 | 13.8691 | 15.2937 | -0.2854 |
| YRI | TBC1D3 | 121529494 | 14.0104 | 15.2937 | -0.2571 |
| YRI | TBC1D3 | 121534494 | 13.6718 | 15.7978 | -0.413  |
| YRI | TBC1D3 | 121539494 | 10.3149 | 13.445  | -0.7089 |
| YRI | TBC1D3 | 121544494 | 8.6074  | 11.0921 | -0.6746 |
| YRI | TBC1D3 | 121549494 | 7.4248  | 13.7811 | -1.4062 |
| YRI | TBC1D3 | 121554494 | 6.7204  | 15.1256 | -1.702  |
| YRI | TBC1D3 | 121559494 | 5.9922  | 10.2518 | -1.245  |
| YRI | TBC1D3 | 121564494 | 5.0517  | 8.7392  | -1.25   |
| YRI | TBC1D3 | 121569494 | 8.0845  | 13.2769 | -1.19   |
| YRI | TBC1D3 | 121574494 | 12.51   | 17.3104 | -0.8545 |
| YRI | TBC1D3 | 121579494 | 14.5102 | 19.1591 | -0.7507 |
| YRI | TBC1D3 | 121584494 | 15.2172 | 23.3606 | -1.0859 |
| YRI | TBC1D3 | 121589494 | 17.4841 | 28.5706 | -1.2158 |
| YRI | TBC1D3 | 121594494 | 17.2028 | 24.7051 | -0.9476 |
| YRI | TBC1D3 | 121599494 | 13.6186 | 17.3104 | -0.6571 |
| YRI | TBC1D3 | 121604494 | 12.2227 | 16.302  | -0.769  |
| YRI | TBC1D3 | 121609494 | 16.7516 | 23.1926 | -0.8649 |
| YRI | TBC1D3 | 121614494 | 15.3597 | 22.5203 | -0.9893 |
| YRI | TBC1D3 | 121619494 | 9.3484  | 15.9659 | -1.2726 |
| YRI | TBC1D3 | 121624494 | 10.1626 | 14.9575 | -0.9813 |
| YRI | TBC1D3 | 121629494 | 9.8705  | 14.4534 | -0.969  |
| YRI | TBC1D3 | 121634494 | 8.326   | 14.6214 | -1.3166 |
| YRI | TBC1D3 | 121639494 | 10.7602 | 16.6382 | -1.0867 |
| YRI | TBC1D3 | 121644494 | 11.4753 | 16.9743 | -0.9974 |
| YRI | TBC1D3 | 121649494 | 13.0012 | 16.134  | -0.5965 |
| YRI | TBC1D3 | 121654494 | 16.266  | 18.3188 | -0.3461 |
| YRI | TBC1D3 | 121659494 | 17.3352 | 21.512  | -0.6032 |
| YRI | TBC1D3 | 121664494 | 18.1577 | 19.9994 | -0.2853 |
| YRI | TBC1D3 | 121669494 | 17.1906 | 16.6382 | 0.1021  |
| YRI | TBC1D3 | 121674494 | 22.0094 | 16.8062 | 0.9527  |
| YRI | TBC1D3 | 121679494 | 22.0754 | 15.2937 | 1.3588  |
| YRI | TBC1D3 | 121684494 | 17.3113 | 13.1089 | 0.9748  |
| YRI | TBC1D3 | 121689494 | 12.3255 | 10.4199 | 0.5486  |
| YRI | TBC1D3 | 121694494 | 13.1194 | 12.7727 | 0.0824  |
| YRI | TBC1D3 | 121699494 | 20.7253 | 18.4868 | 0.3741  |



## 2\_TajimasD\_data

|     |        |           |         |         |         |
|-----|--------|-----------|---------|---------|---------|
| YRI | TBC1D3 | 121704494 | 17.8463 | 16.134  | 0.326   |
| YRI | TBC1D3 | 121709494 | 11.0513 | 12.4366 | -0.3377 |
| YRI | TBC1D3 | 121714494 | 8.787   | 11.4282 | -0.6973 |
| YRI | TBC1D3 | 121719494 | 9.3553  | 10.756  | -0.3914 |
| YRI | TBC1D3 | 121724494 | 10.0109 | 12.6047 | -0.6244 |
| YRI | TBC1D3 | 121729494 | 15.2721 | 16.9743 | -0.3087 |
| YRI | TBC1D3 | 121734494 | 18.7439 | 16.9743 | 0.321   |
| YRI | TBC1D3 | 121739494 | 19.6301 | 17.4785 | 0.3794  |
| YRI | TBC1D3 | 121744494 | 16.7538 | 19.6633 | -0.4582 |
| YRI | TBC1D3 | 121749494 | 11.9498 | 16.6382 | -0.8668 |
| YRI | TBC1D3 | 121754494 | 11.0267 | 15.9659 | -0.9499 |
| YRI | TBC1D3 | 121759494 | 9.4006  | 15.6298 | -1.2225 |
| YRI | TBC1D3 | 121764494 | 6.6568  | 11.7644 | -1.3122 |
| YRI | TBC1D3 | 121769494 | 12.0359 | 12.9408 | -0.2125 |
| YRI | TBC1D3 | 121774494 | 17.5135 | 17.1423 | 0.0667  |
| YRI | TBC1D3 | 121779494 | 19.827  | 19.8313 | -0.0007 |
| YRI | TBC1D3 | 121784494 | 19.8299 | 19.4952 | 0.0531  |
| YRI | TBC1D3 | 121789494 | 16.3218 | 18.6549 | -0.3865 |
| YRI | TBC1D3 | 121794494 | 15.1929 | 17.8146 | -0.454  |
| YRI | TBC1D3 | 121799494 | 14.5252 | 16.6382 | -0.3906 |
| YRI | TBC1D3 | 121804494 | 14.4709 | 14.9575 | -0.0996 |
| YRI | TBC1D3 | 121809494 | 13.6092 | 13.9492 | -0.0744 |
| YRI | TBC1D3 | 121814494 | 14.6624 | 15.9659 | -0.2507 |
| YRI | TBC1D3 | 121819494 | 19.1826 | 18.991  | 0.0312  |
| YRI | TBC1D3 | 121824494 | 18.7909 | 20.3355 | -0.2355 |
| YRI | TBC1D3 | 121829494 | 15.1558 | 19.1591 | -0.6464 |
| CEU | TBC1D3 | 122546961 | 5.8613  | 8.6987  | -0.9721 |
| CEU | TBC1D3 | 122551961 | 6.4886  | 10.5749 | -1.1675 |
| CEU | TBC1D3 | 122556961 | 6.3214  | 10.0632 | -1.1198 |
| CEU | TBC1D3 | 122561961 | 5.021   | 8.0164  | -1.1064 |
| CEU | TBC1D3 | 122566961 | 3.9188  | 6.4814  | -1.1486 |
| CEU | TBC1D3 | 122571961 | 3.1449  | 6.6519  | -1.5354 |
| CEU | TBC1D3 | 122576961 | 4.9079  | 9.3809  | -1.429  |
| CEU | TBC1D3 | 122581961 | 7.3036  | 10.5749 | -0.9347 |
| CEU | TBC1D3 | 122586961 | 6.5916  | 9.3809  | -0.8911 |
| CEU | TBC1D3 | 122591961 | 6.2236  | 8.187   | -0.7113 |
| CEU | TBC1D3 | 122596961 | 9.5851  | 10.0632 | -0.1431 |
| CEU | TBC1D3 | 122601961 | 12.3201 | 12.7922 | -0.1128 |
| CEU | TBC1D3 | 122606961 | 11.9221 | 11.7688 | 0.0396  |
| CEU | TBC1D3 | 122611961 | 12.2841 | 10.4043 | 0.5453  |
| CEU | TBC1D3 | 122616961 | 18.3671 | 12.2805 | 1.5112  |
| CEU | TBC1D3 | 122621961 | 17.6821 | 11.0866 | 1.8029  |
| CEU | TBC1D3 | 122626961 | 8.8458  | 7.6753  | 0.4499  |
| CEU | TBC1D3 | 122631961 | 7.0833  | 7.6753  | -0.2275 |
| CEU | TBC1D3 | 122636961 | 8.6543  | 7.5047  | 0.451   |
| CEU | TBC1D3 | 122641961 | 7.1144  | 6.1402  | 0.4584  |
| CEU | TBC1D3 | 122646961 | 9.5119  | 8.187   | 0.48    |
| CEU | TBC1D3 | 122651961 | 11.536  | 9.5515  | 0.6235  |
| CEU | TBC1D3 | 122656961 | 10.6219 | 8.6987  | 0.6589  |

## 2\_TajimasD\_data

|     |        |           |         |         |         |
|-----|--------|-----------|---------|---------|---------|
| CEU | TBC1D3 | 122661961 | 13.7882 | 10.916  | 0.7966  |
| CEU | TBC1D3 | 122666961 | 15.5234 | 12.9627 | 0.6041  |
| CEU | TBC1D3 | 122671961 | 12.4347 | 11.7688 | 0.1721  |
| CEU | TBC1D3 | 122676961 | 12.683  | 12.2805 | 0.0999  |
| CEU | TBC1D3 | 122681961 | 15.6869 | 12.7922 | 0.6915  |
| CEU | TBC1D3 | 122686961 | 12.0727 | 10.5749 | 0.4279  |
| CEU | TBC1D3 | 122691961 | 14.3409 | 12.6216 | 0.416   |
| CEU | TBC1D3 | 122696961 | 17.3098 | 13.4744 | 0.8723  |
| CEU | TBC1D3 | 122701961 | 18.3956 | 14.4978 | 0.8269  |
| CEU | TBC1D3 | 122706961 | 15.5442 | 13.3039 | 0.5157  |
| CEU | TBC1D3 | 122711961 | 8.9592  | 8.6987  | 0.0892  |
| CEU | TBC1D3 | 122716961 | 6.6079  | 6.9931  | -0.1612 |
| CEU | TBC1D3 | 122721961 | 5.9015  | 5.2874  | 0.3302  |
| CEU | TBC1D3 | 122726961 | 5.8646  | 4.0935  | 1.1909  |
| CEU | TBC1D3 | 122731961 | 4.5263  | 5.458   | -0.4871 |
| CEU | TBC1D3 | 122736961 | 6.536   | 7.6753  | -0.4379 |
| CEU | TBC1D3 | 122741961 | 10.0465 | 8.0164  | 0.7498  |
| CEU | TBC1D3 | 122746961 | 6.6824  | 5.9697  | 0.344   |
| CEU | TBC1D3 | 122751961 | 5.1424  | 5.1169  | 0.0141  |
| CEU | TBC1D3 | 122756961 | 9.4842  | 6.6519  | 1.24    |
| CEU | TBC1D3 | 122761961 | 11.985  | 6.3108  | 2.6051  |
| CEU | TBC1D3 | 122766961 | 11.5444 | 6.1402  | 2.5431  |
| CEU | TBC1D3 | 122771961 | 5.6456  | 4.4346  | 0.7598  |
| CEU | TBC1D3 | 122776961 | 4.5655  | 4.6052  | -0.0241 |
| CEU | TBC1D3 | 122781961 | 9.942   | 8.3576  | 0.5632  |
| CEU | TBC1D3 | 122786961 | 11.1702 | 8.187   | 1.0807  |
| CEU | TBC1D3 | 122791961 | 9.6957  | 7.6753  | 0.7766  |
| CEU | TBC1D3 | 122796961 | 9.3523  | 8.6987  | 0.2239  |
| CEU | TBC1D3 | 122801961 | 13.7415 | 9.2104  | 1.4724  |
| CEU | TBC1D3 | 122806961 | 13.0231 | 9.0398  | 1.317   |
| CEU | TBC1D3 | 122811961 | 5.8942  | 6.4814  | -0.2632 |
| CEU | TBC1D3 | 122816961 | 6.0227  | 6.3108  | -0.1323 |
| CEU | TBC1D3 | 122821961 | 6.7669  | 8.187   | -0.5145 |
| CEU | TBC1D3 | 122826961 | 5.7551  | 6.9931  | -0.518  |
| CEU | TBC1D3 | 122831961 | 4.804   | 5.7991  | -0.4929 |
| CEU | TBC1D3 | 122836961 | 5.1771  | 7.5047  | -0.9132 |
| CEU | TBC1D3 | 122841961 | 7.1971  | 8.6987  | -0.5144 |
| CEU | TBC1D3 | 122846961 | 6.9347  | 8.3576  | -0.5058 |
| CEU | TBC1D3 | 122851961 | 5.4675  | 8.187   | -0.9852 |
| CEU | TBC1D3 | 122856961 | 6.9283  | 7.5047  | -0.2262 |
| CEU | TBC1D3 | 122861961 | 8.3531  | 6.9931  | 0.569   |
| CEU | TBC1D3 | 122866961 | 6.9736  | 6.9931  | -0.0082 |
| CEU | TBC1D3 | 122871961 | 7.9213  | 6.9931  | 0.3884  |
| CEU | TBC1D3 | 122876961 | 8.9551  | 7.3342  | 0.6494  |
| CEU | TBC1D3 | 122881961 | 7.1     | 6.9931  | 0.0447  |
| CEU | TBC1D3 | 122886961 | 8.4589  | 8.0164  | 0.1634  |
| CEU | TBC1D3 | 122891961 | 10.0875 | 7.8459  | 0.8444  |
| CEU | TBC1D3 | 122896961 | 9.6364  | 7.8459  | 0.6745  |
| CEU | TBC1D3 | 122901961 | 7.3975  | 7.6753  | -0.1068 |

## 2\_TajimasD\_data

|     |        |           |         |         |         |
|-----|--------|-----------|---------|---------|---------|
| CEU | TBC1D3 | 122906961 | 4.3523  | 5.1169  | -0.4232 |
| CEU | TBC1D3 | 122911961 | 4.4527  | 5.2874  | -0.4488 |
| CEU | TBC1D3 | 122916961 | 4.1177  | 5.2874  | -0.629  |
| CEU | TBC1D3 | 122921961 | 4.4548  | 6.1402  | -0.7931 |
| CEU | TBC1D3 | 122926961 | 5.7236  | 8.3576  | -0.9363 |
| CEU | TBC1D3 | 122931961 | 5.7951  | 7.8459  | -0.7726 |
| CEU | TBC1D3 | 122936961 | 6.0684  | 7.6753  | -0.6176 |
| CEU | TBC1D3 | 122941961 | 7.7767  | 9.2104  | -0.4659 |
| CEU | TBC1D3 | 122946961 | 8.4333  | 8.3576  | 0.0269  |
| CEU | TBC1D3 | 122951961 | 7.2589  | 5.6286  | 0.8293  |
| CEU | TBC1D3 | 122956961 | 7.5735  | 6.4814  | 0.4895  |
| CEU | TBC1D3 | 122961961 | 7.8604  | 7.3342  | 0.2108  |
| CEU | TBC1D3 | 122966961 | 8.7417  | 6.8225  | 0.8212  |
| CEU | TBC1D3 | 122971961 | 8.625   | 8.0164  | 0.2248  |
| CEU | TBC1D3 | 122976961 | 6.403   | 6.6519  | -0.109  |
| CEU | TBC1D3 | 122981961 | 6.4867  | 5.9697  | 0.2495  |
| CEU | TBC1D3 | 122986961 | 7.3478  | 7.3342  | 0.0054  |
| CEU | TBC1D3 | 122991961 | 6.8497  | 6.3108  | 0.2474  |
| CEU | TBC1D3 | 122996961 | 7.9423  | 6.4814  | 0.6548  |
| CEU | TBC1D3 | 123001961 | 10.8547 | 9.5515  | 0.4094  |
| CEU | TBC1D3 | 123006961 | 8.9252  | 9.0398  | -0.0379 |
| CEU | TBC1D3 | 123011961 | 6.5202  | 7.6753  | -0.444  |
| CEU | TBC1D3 | 123016961 | 9.7082  | 10.2337 | -0.1548 |
| CEU | TBC1D3 | 123021961 | 13.9975 | 11.5982 | 0.6286  |
| CEU | TBC1D3 | 123026961 | 18.2997 | 13.645  | 1.046   |
| CEU | TBC1D3 | 123031961 | 12.6887 | 13.1333 | -0.1036 |
| CEU | TBC1D3 | 123036961 | 4.9777  | 10.916  | -1.647  |
| CEU | TBC1D3 | 123041961 | 5.6665  | 9.3809  | -1.1866 |
| CEU | TBC1D3 | 123046961 | 9.3094  | 8.187   | 0.4066  |
| CEU | TBC1D3 | 123051961 | 6.3626  | 6.6519  | -0.1267 |
| CEU | TBC1D3 | 123056961 | 1.7452  | 4.6052  | -1.7364 |
| CEU | TBC1D3 | 123061961 | 2.4805  | 3.7524  | -0.9215 |
| CEU | TBC1D3 | 123066961 | 1.3863  | 3.0701  | -1.4443 |
| CEU | TBC1D3 | 123071961 | 0.8703  | 4.2641  | -2.2031 |
| CEU | TBC1D3 | 123076961 | 1.4521  | 4.4346  | -1.8713 |
| CEU | TBC1D3 | 123081961 | 1.248   | 3.4112  | -1.699  |
| CEU | TBC1D3 | 123086961 | 0.9357  | 3.4112  | -1.9443 |
| CEU | TBC1D3 | 123091961 | 2.3329  | 4.4346  | -1.3187 |
| CEU | TBC1D3 | 123096961 | 3.5164  | 4.7757  | -0.7406 |
| CEU | TBC1D3 | 123101961 | 3.082   | 3.9229  | -0.5865 |
| CEU | TBC1D3 | 123106961 | 2.8363  | 3.5818  | -0.5619 |
| CEU | TBC1D3 | 123111961 | 2.2369  | 4.0935  | -1.2484 |
| CEU | TBC1D3 | 123116961 | 2.0484  | 4.4346  | -1.4972 |
| CEU | TBC1D3 | 123121961 | 2.3908  | 4.4346  | -1.2824 |
| CEU | TBC1D3 | 123126961 | 2.2806  | 5.6286  | -1.703  |
| CEU | TBC1D3 | 123131961 | 4.4029  | 6.8225  | -1.0353 |
| CEU | TBC1D3 | 123136961 | 5.139   | 5.7991  | -0.3269 |
| CEU | TBC1D3 | 123141961 | 4.6619  | 4.9463  | -0.1622 |
| CEU | TBC1D3 | 123146961 | 5.8891  | 6.1402  | -0.1182 |

## 2\_TajimasD\_data

|     |        |           |         |         |         |
|-----|--------|-----------|---------|---------|---------|
| CEU | TBC1D3 | 123151961 | 4.6467  | 6.6519  | -0.8779 |
| CEU | TBC1D3 | 123156961 | 2.6042  | 6.1402  | -1.6639 |
| CEU | TBC1D3 | 123161961 | 1.9429  | 5.6286  | -1.8748 |
| CEU | TBC1D3 | 123166961 | 5.1332  | 6.4814  | -0.6043 |
| CEU | TBC1D3 | 123171961 | 9.0711  | 8.187   | 0.3203  |
| CEU | TBC1D3 | 123176961 | 21.7926 | 13.1333 | 2.0177  |
| CEU | TBC1D3 | 123181961 | 30.4892 | 16.5446 | 2.6082  |
| CEU | TBC1D3 | 123186961 | 18.0618 | 11.0866 | 1.9067  |
| CEU | TBC1D3 | 123191961 | 7.0202  | 6.1402  | 0.4141  |
| CEU | TBC1D3 | 123196961 | 6.1367  | 5.458   | 0.3548  |
| CEU | TBC1D3 | 123201961 | 7.2606  | 5.9697  | 0.623   |
| CEU | TBC1D3 | 123206961 | 6.2706  | 6.3108  | -0.0185 |
| CEU | TBC1D3 | 123211961 | 8.3324  | 8.0164  | 0.1167  |
| CEU | TBC1D3 | 123216961 | 9.8975  | 8.3576  | 0.5474  |
| CEU | TBC1D3 | 123221961 | 8.2113  | 7.1636  | 0.4289  |
| CEU | TBC1D3 | 123226961 | 8.8027  | 7.8459  | 0.3604  |
| CEU | TBC1D3 | 123231961 | 6.6916  | 7.6753  | -0.3781 |
| CEU | TBC1D3 | 123236961 | 5.907   | 6.9931  | -0.4544 |
| CEU | TBC1D3 | 123241961 | 7.6735  | 8.3576  | -0.2432 |
| CEU | TBC1D3 | 123246961 | 7.0878  | 9.0398  | -0.6454 |
| CEU | TBC1D3 | 123251961 | 6.3826  | 7.5047  | -0.4403 |
| CEU | TBC1D3 | 123256961 | 5.215   | 5.9697  | -0.3642 |
| CEU | TBC1D3 | 123261961 | 5.5622  | 5.9697  | -0.1967 |
| CEU | TBC1D3 | 123266961 | 8.1958  | 8.3576  | -0.0575 |
| CEU | TBC1D3 | 123271961 | 9.7163  | 8.8692  | 0.2851  |
| CEU | TBC1D3 | 123276961 | 11.0594 | 8.6987  | 0.8088  |
| CEU | TBC1D3 | 123281961 | 9.3115  | 9.0398  | 0.0898  |
| CEU | TBC1D3 | 123286961 | 6.7384  | 7.1636  | -0.1741 |
| CEU | TBC1D3 | 123291961 | 4.6032  | 4.6052  | -0.0012 |
| CEU | TBC1D3 | 123296961 | 4.1781  | 4.6052  | -0.2593 |
| CEU | TBC1D3 | 123301961 | 6.859   | 4.9463  | 1.0908  |
| CEU | TBC1D3 | 123306961 | 7.892   | 5.6286  | 1.1513  |
| CEU | TBC1D3 | 123311961 | 8.498   | 7.3342  | 0.4663  |
| CEU | TBC1D3 | 123316961 | 10.0503 | 7.3342  | 1.0883  |
| CEU | TBC1D3 | 123321961 | 12.7543 | 7.8459  | 1.8491  |
| CEU | TBC1D3 | 123326961 | 11.672  | 7.8459  | 1.4413  |
| CEU | TBC1D3 | 123331961 | 9.6551  | 8.3576  | 0.4612  |
| CEU | TBC1D3 | 123336961 | 6.4723  | 7.5047  | -0.4051 |
| CEU | TBC1D3 | 123341961 | 5.1505  | 6.9931  | -0.771  |
| CEU | TBC1D3 | 123346961 | 6.8759  | 7.5047  | -0.2467 |
| CEU | TBC1D3 | 123351961 | 5.6805  | 6.1402  | -0.2163 |
| CEU | TBC1D3 | 123356961 | 3.663   | 5.6286  | -0.9998 |
| CEU | TBC1D3 | 123361961 | 5.8328  | 6.3108  | -0.2195 |
| CEU | TBC1D3 | 123366961 | 9.3053  | 6.4814  | 1.2657  |
| CEU | TBC1D3 | 123371961 | 7.6541  | 6.1402  | 0.7124  |
| CEU | TBC1D3 | 123376961 | 5.4974  | 6.1402  | -0.3025 |
| CEU | TBC1D3 | 123381961 | 8.2235  | 6.6519  | 0.6881  |
| CEU | TBC1D3 | 123386961 | 7.6685  | 5.9697  | 0.8199  |
| CEU | TBC1D3 | 123391961 | 7.8938  | 6.1402  | 0.8252  |

## 2\_TajimasD\_data

|     |        |           |         |         |         |
|-----|--------|-----------|---------|---------|---------|
| CEU | TBC1D3 | 123396961 | 8.7504  | 6.8225  | 0.8249  |
| CEU | TBC1D3 | 123401961 | 10.7256 | 8.8692  | 0.6247  |
| CEU | TBC1D3 | 123406961 | 16.3416 | 10.5749 | 1.6476  |
| CEU | TBC1D3 | 123411961 | 15.295  | 9.2104  | 1.9772  |
| CEU | TBC1D3 | 123416961 | 7.2958  | 7.5047  | -0.082  |
| CEU | TBC1D3 | 123421961 | 2.1062  | 5.458   | -1.7522 |
| CEU | TBC1D3 | 123426961 | 3.9645  | 6.1402  | -1.0238 |
| CEU | TBC1D3 | 123431961 | 11.3424 | 10.0632 | 0.3828  |
| CEU | TBC1D3 | 123436961 | 12.2119 | 10.0632 | 0.643   |
| CEU | TBC1D3 | 123441961 | 17.3226 | 11.9394 | 1.3725  |
| CEU | TBC1D3 | 123446961 | 24.5343 | 16.374  | 1.5415  |
| CEU | TBC1D3 | 123451961 | 18.7139 | 17.2268 | 0.2676  |
| CEU | TBC1D3 | 123456961 | 14.3696 | 14.6684 | -0.0627 |
| CEU | TBC1D3 | 123461961 | 16.9142 | 14.1567 | 0.5984  |
| CEU | TBC1D3 | 123466961 | 18.2294 | 14.4978 | 0.7917  |
| CEU | TBC1D3 | 123471961 | 10.0272 | 9.0398  | 0.3265  |
| CEU | TBC1D3 | 123476961 | 3.6376  | 5.458   | -0.9517 |
| CEU | TBC1D3 | 123481961 | 5.7916  | 7.5047  | -0.6721 |
| CEU | TBC1D3 | 123486961 | 6.8666  | 9.0398  | -0.7185 |
| CEU | TBC1D3 | 123491961 | 8.9114  | 10.916  | -0.556  |
| CEU | TBC1D3 | 123496961 | 10.7697 | 12.1099 | -0.3372 |
| CEU | TBC1D3 | 123501961 | 7.3991  | 9.5515  | -0.6762 |
| CEU | TBC1D3 | 123506961 | 6.9695  | 9.3809  | -0.7703 |
| CEU | TBC1D3 | 123511961 | 8.0424  | 9.7221  | -0.5191 |
| CEU | TBC1D3 | 123516961 | 10.0529 | 8.8692  | 0.3983  |
| CEU | TBC1D3 | 123521961 | 12.8874 | 9.3809  | 1.1202  |
| CEU | TBC1D3 | 123526961 | 8.8592  | 8.187   | 0.2435  |
| CEU | TBC1D3 | 123531961 | 9.5397  | 7.8459  | 0.6381  |
| CEU | TBC1D3 | 123536961 | 17.8116 | 12.6216 | 1.2557  |
| CEU | TBC1D3 | 123541961 | 14.717  | 12.6216 | 0.507   |
| CEU | TBC1D3 | 123546961 | 9.3591  | 10.2337 | -0.2577 |
| CEU | TBC1D3 | 123551961 | 9.2773  | 10.4043 | -0.3269 |
| CEU | TBC1D3 | 123556961 | 7.9276  | 8.3576  | -0.1529 |
| CEU | TBC1D3 | 123561961 | 5.9746  | 7.5047  | -0.6003 |
| CEU | TBC1D3 | 123566961 | 9.3989  | 9.0398  | 0.1187  |
| CEU | TBC1D3 | 123571961 | 12.7488 | 9.2104  | 1.1498  |
| CEU | TBC1D3 | 123576961 | 8.7575  | 8.6987  | 0.0201  |
| CEU | TBC1D3 | 123581961 | 6.0136  | 9.3809  | -1.0757 |
| CEU | TBC1D3 | 123586961 | 5.2909  | 8.8692  | -1.2041 |
| CEU | TBC1D3 | 123591961 | 4.5112  | 7.8459  | -1.2562 |
| CEU | TBC1D3 | 123596961 | 5.8798  | 8.8692  | -1.0059 |
| CEU | TBC1D3 | 123601961 | 9.0272  | 9.3809  | -0.113  |
| CEU | TBC1D3 | 123606961 | 12.2282 | 9.5515  | 0.8409  |
| CEU | TBC1D3 | 123611961 | 8.563   | 8.0164  | 0.2019  |
| CEU | TBC1D3 | 123616961 | 2.4212  | 5.6286  | -1.6315 |
| CEU | TBC1D3 | 123621961 | 5.9508  | 7.1636  | -0.4965 |
| CEU | TBC1D3 | 123626961 | 7.855   | 8.3576  | -0.1787 |
| CEU | TBC1D3 | 123631961 | 6.7384  | 7.3342  | -0.2387 |
| CEU | TBC1D3 | 123636961 | 7.0952  | 6.6519  | 0.1941  |

## 2\_TajimasD\_data

|     |        |           |         |         |         |
|-----|--------|-----------|---------|---------|---------|
| CEU | TBC1D3 | 123641961 | 6.0466  | 6.6519  | -0.265  |
| CEU | TBC1D3 | 123646961 | 6.8971  | 6.6519  | 0.1074  |
| CEU | TBC1D3 | 123651961 | 5.7516  | 6.4814  | -0.3271 |
| CEU | TBC1D3 | 123656961 | 6.3288  | 6.9931  | -0.278  |
| CHB | TBC1D3 | 122546961 | 6.0402  | 8.3013  | -0.8064 |
| CHB | TBC1D3 | 122551961 | 5.6495  | 7.9625  | -0.8571 |
| CHB | TBC1D3 | 122556961 | 4.6057  | 9.6567  | -1.5662 |
| CHB | TBC1D3 | 122561961 | 3.0194  | 9.4872  | -2.0388 |
| CHB | TBC1D3 | 122566961 | 2.744   | 7.7931  | -1.9083 |
| CHB | TBC1D3 | 122571961 | 2.4571  | 7.1154  | -1.913  |
| CHB | TBC1D3 | 122576961 | 4.2627  | 8.4708  | -1.4731 |
| CHB | TBC1D3 | 122581961 | 7.5772  | 9.8261  | -0.6861 |
| CHB | TBC1D3 | 122586961 | 7.3785  | 9.1484  | -0.5771 |
| CHB | TBC1D3 | 122591961 | 8.815   | 8.8096  | 0.0018  |
| CHB | TBC1D3 | 122596961 | 11.6158 | 11.012  | 0.1656  |
| CHB | TBC1D3 | 122601961 | 7.7588  | 9.6567  | -0.5885 |
| CHB | TBC1D3 | 122606961 | 4.4234  | 8.8096  | -1.4809 |
| CHB | TBC1D3 | 122611961 | 4.7335  | 9.9955  | -1.5801 |
| CHB | TBC1D3 | 122616961 | 6.0202  | 11.6896 | -1.4703 |
| CHB | TBC1D3 | 122621961 | 6.3128  | 12.3673 | -1.4889 |
| CHB | TBC1D3 | 122626961 | 4.6935  | 10.3343 | -1.642  |
| CHB | TBC1D3 | 122631961 | 5.0097  | 9.9955  | -1.4971 |
| CHB | TBC1D3 | 122636961 | 5.2342  | 9.6567  | -1.3713 |
| CHB | TBC1D3 | 122641961 | 3.7221  | 8.8096  | -1.7177 |
| CHB | TBC1D3 | 122646961 | 5.1848  | 8.8096  | -1.2238 |
| CHB | TBC1D3 | 122651961 | 8.1708  | 8.8096  | -0.2157 |
| CHB | TBC1D3 | 122656961 | 10.3293 | 8.3013  | 0.7233  |
| CHB | TBC1D3 | 122661961 | 12.9117 | 11.5202 | 0.3658  |
| CHB | TBC1D3 | 122666961 | 13.3839 | 13.5532 | -0.0382 |
| CHB | TBC1D3 | 122671961 | 10.2266 | 11.6896 | -0.3794 |
| CHB | TBC1D3 | 122676961 | 10.7045 | 11.6896 | -0.2555 |
| CHB | TBC1D3 | 122681961 | 12.0796 | 12.0285 | 0.0129  |
| CHB | TBC1D3 | 122686961 | 9.2303  | 10.1649 | -0.2763 |
| CHB | TBC1D3 | 122691961 | 10.9663 | 11.3508 | -0.1025 |
| CHB | TBC1D3 | 122696961 | 14.1631 | 14.9085 | -0.1535 |
| CHB | TBC1D3 | 122701961 | 18.8497 | 16.9415 | 0.3479  |
| CHB | TBC1D3 | 122706961 | 14.1021 | 11.6896 | 0.6256  |
| CHB | TBC1D3 | 122711961 | 5.5416  | 6.7766  | -0.5301 |
| CHB | TBC1D3 | 122716961 | 4.4713  | 6.2684  | -0.8277 |
| CHB | TBC1D3 | 122721961 | 3.6587  | 7.1154  | -1.4196 |
| CHB | TBC1D3 | 122726961 | 3.6294  | 7.9625  | -1.6057 |
| CHB | TBC1D3 | 122731961 | 2.9223  | 6.6072  | -1.6184 |
| CHB | TBC1D3 | 122736961 | 3.6878  | 6.6072  | -1.2822 |
| CHB | TBC1D3 | 122741961 | 6.3832  | 7.4543  | -0.4216 |
| CHB | TBC1D3 | 122746961 | 5.1525  | 7.6237  | -0.953  |
| CHB | TBC1D3 | 122751961 | 3.004   | 6.7766  | -1.6194 |
| CHB | TBC1D3 | 122756961 | 4.6933  | 8.6402  | -1.3567 |
| CHB | TBC1D3 | 122761961 | 5.6731  | 9.9955  | -1.2979 |
| CHB | TBC1D3 | 122766961 | 5.577   | 8.3013  | -0.9716 |

## 2\_TajimasD\_data

|     |        |           |         |         |         |
|-----|--------|-----------|---------|---------|---------|
| CHB | TBC1D3 | 122771961 | 3.4852  | 9.1484  | -1.8464 |
| CHB | TBC1D3 | 122776961 | 4.1966  | 10.5037 | -1.8082 |
| CHB | TBC1D3 | 122781961 | 8.6821  | 9.3178  | -0.2038 |
| CHB | TBC1D3 | 122786961 | 8.9048  | 10.5037 | -0.4584 |
| CHB | TBC1D3 | 122791961 | 7.6484  | 9.8261  | -0.6644 |
| CHB | TBC1D3 | 122796961 | 8.3345  | 8.4708  | -0.0477 |
| CHB | TBC1D3 | 122801961 | 12.2361 | 11.6896 | 0.1417  |
| CHB | TBC1D3 | 122806961 | 11.6714 | 11.6896 | -0.0047 |
| CHB | TBC1D3 | 122811961 | 6.6766  | 8.979   | -0.7638 |
| CHB | TBC1D3 | 122816961 | 7.0388  | 7.9625  | -0.3423 |
| CHB | TBC1D3 | 122821961 | 7.2012  | 7.4543  | -0.0996 |
| CHB | TBC1D3 | 122826961 | 5.6292  | 8.3013  | -0.953  |
| CHB | TBC1D3 | 122831961 | 3.2408  | 8.4708  | -1.8309 |
| CHB | TBC1D3 | 122836961 | 2.4753  | 8.1319  | -2.056  |
| CHB | TBC1D3 | 122841961 | 4.7322  | 8.979   | -1.4088 |
| CHB | TBC1D3 | 122846961 | 4.799   | 8.1319  | -1.2114 |
| CHB | TBC1D3 | 122851961 | 3.4298  | 6.946   | -1.476  |
| CHB | TBC1D3 | 122856961 | 4.7114  | 7.4543  | -1.0797 |
| CHB | TBC1D3 | 122861961 | 6.1475  | 7.2848  | -0.4572 |
| CHB | TBC1D3 | 122866961 | 5.6334  | 6.2684  | -0.2925 |
| CHB | TBC1D3 | 122871961 | 7.8608  | 8.6402  | -0.2679 |
| CHB | TBC1D3 | 122876961 | 8.9334  | 8.979   | -0.0151 |
| CHB | TBC1D3 | 122881961 | 6.795   | 7.4543  | -0.2595 |
| CHB | TBC1D3 | 122886961 | 7.8771  | 9.8261  | -0.5946 |
| CHB | TBC1D3 | 122891961 | 9.6685  | 11.012  | -0.3685 |
| CHB | TBC1D3 | 122896961 | 9.8744  | 10.6731 | -0.2256 |
| CHB | TBC1D3 | 122901961 | 8.9705  | 9.3178  | -0.1113 |
| CHB | TBC1D3 | 122906961 | 6.2389  | 7.1154  | -0.36   |
| CHB | TBC1D3 | 122911961 | 5.3786  | 7.4543  | -0.8171 |
| CHB | TBC1D3 | 122916961 | 5.2281  | 6.6072  | -0.6057 |
| CHB | TBC1D3 | 122921961 | 5.9284  | 8.4708  | -0.89   |
| CHB | TBC1D3 | 122926961 | 8.45    | 9.8261  | -0.4198 |
| CHB | TBC1D3 | 122931961 | 6.8991  | 7.4543  | -0.2185 |
| CHB | TBC1D3 | 122936961 | 5.9638  | 8.8096  | -0.9608 |
| CHB | TBC1D3 | 122941961 | 8.3027  | 9.3178  | -0.3254 |
| CHB | TBC1D3 | 122946961 | 7.8256  | 7.2848  | 0.2174  |
| CHB | TBC1D3 | 122951961 | 6.5983  | 6.0989  | 0.2357  |
| CHB | TBC1D3 | 122956961 | 6.9799  | 8.4708  | -0.5219 |
| CHB | TBC1D3 | 122961961 | 8.3711  | 13.5532 | -1.1687 |
| CHB | TBC1D3 | 122966961 | 9.6379  | 13.045  | -0.7967 |
| CHB | TBC1D3 | 122971961 | 8.8862  | 9.4872  | -0.1894 |
| CHB | TBC1D3 | 122976961 | 7.5639  | 8.1319  | -0.2065 |
| CHB | TBC1D3 | 122981961 | 6.6678  | 6.4378  | 0.1034  |
| CHB | TBC1D3 | 122986961 | 6.9694  | 6.6072  | 0.1591  |
| CHB | TBC1D3 | 122991961 | 8.0062  | 9.4872  | -0.4668 |
| CHB | TBC1D3 | 122996961 | 10.2336 | 10.6731 | -0.1241 |
| CHB | TBC1D3 | 123001961 | 12.0871 | 9.9955  | 0.6281  |
| CHB | TBC1D3 | 123006961 | 9.5212  | 8.8096  | 0.2403  |
| CHB | TBC1D3 | 123011961 | 7.8498  | 8.4708  | -0.2174 |

## 2\_TajimasD\_data

|     |        |           |         |         |         |
|-----|--------|-----------|---------|---------|---------|
| CHB | TBC1D3 | 123016961 | 10.6008 | 9.9955  | 0.1818  |
| CHB | TBC1D3 | 123021961 | 14.2467 | 11.6896 | 0.6631  |
| CHB | TBC1D3 | 123026961 | 19.8943 | 14.4003 | 1.1697  |
| CHB | TBC1D3 | 123031961 | 15.1532 | 14.4003 | 0.1603  |
| CHB | TBC1D3 | 123036961 | 8.0468  | 12.0285 | -1.0052 |
| CHB | TBC1D3 | 123041961 | 7.3246  | 9.6567  | -0.7231 |
| CHB | TBC1D3 | 123046961 | 8.463   | 8.8096  | -0.117  |
| CHB | TBC1D3 | 123051961 | 6.2328  | 8.3013  | -0.7377 |
| CHB | TBC1D3 | 123056961 | 2.3139  | 8.1319  | -2.1147 |
| CHB | TBC1D3 | 123061961 | 2.6246  | 9.1484  | -2.127  |
| CHB | TBC1D3 | 123066961 | 1.4595  | 9.3178  | -2.5189 |
| CHB | TBC1D3 | 123071961 | 1.8237  | 9.3178  | -2.4021 |
| CHB | TBC1D3 | 123076961 | 2.4761  | 8.979   | -2.1572 |
| CHB | TBC1D3 | 123081961 | 1.4517  | 6.7766  | -2.2858 |
| CHB | TBC1D3 | 123086961 | 0.7232  | 5.0825  | -2.4202 |
| CHB | TBC1D3 | 123091961 | 2.4137  | 7.6237  | -2.0091 |
| CHB | TBC1D3 | 123096961 | 3.6907  | 9.3178  | -1.8037 |
| CHB | TBC1D3 | 123101961 | 3.3745  | 9.3178  | -1.9051 |
| CHB | TBC1D3 | 123106961 | 3.3073  | 8.3013  | -1.7811 |
| CHB | TBC1D3 | 123111961 | 3.0967  | 7.6237  | -1.7457 |
| CHB | TBC1D3 | 123116961 | 2.5515  | 7.9625  | -2.0051 |
| CHB | TBC1D3 | 123121961 | 2.2882  | 5.0825  | -1.5513 |
| CHB | TBC1D3 | 123126961 | 2.9981  | 5.2519  | -1.2155 |
| CHB | TBC1D3 | 123131961 | 5.3852  | 7.6237  | -0.8632 |
| CHB | TBC1D3 | 123136961 | 5.9984  | 7.1154  | -0.4587 |
| CHB | TBC1D3 | 123141961 | 5.9166  | 7.1154  | -0.4923 |
| CHB | TBC1D3 | 123146961 | 8.1251  | 6.6072  | 0.6667  |
| CHB | TBC1D3 | 123151961 | 6.8374  | 6.0989  | 0.3486  |
| CHB | TBC1D3 | 123156961 | 3.5736  | 6.7766  | -1.3749 |
| CHB | TBC1D3 | 123161961 | 2.3868  | 6.0989  | -1.7523 |
| CHB | TBC1D3 | 123166961 | 5.2748  | 6.946   | -0.7015 |
| CHB | TBC1D3 | 123171961 | 8.2537  | 9.1484  | -0.2917 |
| CHB | TBC1D3 | 123176961 | 21.4551 | 14.7391 | 1.3986  |
| CHB | TBC1D3 | 123181961 | 29.674  | 17.2803 | 2.2172  |
| CHB | TBC1D3 | 123186961 | 16.0881 | 11.1814 | 1.3267  |
| CHB | TBC1D3 | 123191961 | 5.9374  | 6.2684  | -0.1524 |
| CHB | TBC1D3 | 123196961 | 4.7363  | 5.2519  | -0.2781 |
| CHB | TBC1D3 | 123201961 | 5.6433  | 6.4378  | -0.3572 |
| CHB | TBC1D3 | 123206961 | 5.4765  | 7.1154  | -0.673  |
| CHB | TBC1D3 | 123211961 | 6.996   | 8.8096  | -0.6123 |
| CHB | TBC1D3 | 123216961 | 7.5623  | 9.8261  | -0.6907 |
| CHB | TBC1D3 | 123221961 | 4.9379  | 8.979   | -1.3406 |
| CHB | TBC1D3 | 123226961 | 5.1906  | 8.8096  | -1.2219 |
| CHB | TBC1D3 | 123231961 | 5.1527  | 8.1319  | -1.0829 |
| CHB | TBC1D3 | 123236961 | 5.2433  | 8.6402  | -1.1676 |
| CHB | TBC1D3 | 123241961 | 8.2629  | 11.1814 | -0.7891 |
| CHB | TBC1D3 | 123246961 | 8.313   | 11.012  | -0.7403 |
| CHB | TBC1D3 | 123251961 | 5.9807  | 8.979   | -0.9946 |
| CHB | TBC1D3 | 123256961 | 4.5518  | 7.6237  | -1.1846 |



## 2\_TajimasD\_data

|     |        |           |         |         |         |
|-----|--------|-----------|---------|---------|---------|
| CHB | TBC1D3 | 123261961 | 4.2553  | 7.6237  | -1.2989 |
| CHB | TBC1D3 | 123266961 | 5.3737  | 8.979   | -1.196  |
| CHB | TBC1D3 | 123271961 | 6.1755  | 9.6567  | -1.0794 |
| CHB | TBC1D3 | 123276961 | 6.9338  | 9.6567  | -0.8443 |
| CHB | TBC1D3 | 123281961 | 6.6141  | 9.4872  | -0.9057 |
| CHB | TBC1D3 | 123286961 | 5.5469  | 9.3178  | -1.2087 |
| CHB | TBC1D3 | 123291961 | 3.7761  | 6.946   | -1.3306 |
| CHB | TBC1D3 | 123296961 | 2.7093  | 6.2684  | -1.6392 |
| CHB | TBC1D3 | 123301961 | 5.048   | 8.1319  | -1.1209 |
| CHB | TBC1D3 | 123306961 | 8.5306  | 8.6402  | -0.0377 |
| CHB | TBC1D3 | 123311961 | 10.6115 | 8.3013  | 0.8239  |
| CHB | TBC1D3 | 123316961 | 11.5037 | 8.6402  | 0.9843  |
| CHB | TBC1D3 | 123321961 | 12.6227 | 9.1484  | 1.1328  |
| CHB | TBC1D3 | 123326961 | 11.4211 | 8.4708  | 1.0328  |
| CHB | TBC1D3 | 123331961 | 13.1732 | 8.6402  | 1.5582  |
| CHB | TBC1D3 | 123336961 | 10.3025 | 7.4543  | 1.1211  |
| CHB | TBC1D3 | 123341961 | 6.4592  | 7.2848  | -0.3319 |
| CHB | TBC1D3 | 123346961 | 7.6992  | 7.9625  | -0.0976 |
| CHB | TBC1D3 | 123351961 | 7.0019  | 7.7931  | -0.299  |
| CHB | TBC1D3 | 123356961 | 5.4375  | 7.4543  | -0.7939 |
| CHB | TBC1D3 | 123361961 | 6.8014  | 7.4543  | -0.257  |
| CHB | TBC1D3 | 123366961 | 10.2257 | 8.8096  | 0.4781  |
| CHB | TBC1D3 | 123371961 | 7.9784  | 8.6402  | -0.2275 |
| CHB | TBC1D3 | 123376961 | 5.2789  | 8.1319  | -1.037  |
| CHB | TBC1D3 | 123381961 | 5.2174  | 7.7931  | -0.9735 |
| CHB | TBC1D3 | 123386961 | 4.3113  | 7.2848  | -1.1952 |
| CHB | TBC1D3 | 123391961 | 4.8951  | 7.9625  | -1.1367 |
| CHB | TBC1D3 | 123396961 | 6.7706  | 8.4708  | -0.5952 |
| CHB | TBC1D3 | 123401961 | 8.3021  | 9.9955  | -0.5085 |
| CHB | TBC1D3 | 123406961 | 9.8678  | 11.5202 | -0.4344 |
| CHB | TBC1D3 | 123411961 | 9.1177  | 10.3343 | -0.3541 |
| CHB | TBC1D3 | 123416961 | 5.7034  | 6.946   | -0.5216 |
| CHB | TBC1D3 | 123421961 | 3.0946  | 4.913   | -1.0401 |
| CHB | TBC1D3 | 123426961 | 4.0659  | 5.4213  | -0.7107 |
| CHB | TBC1D3 | 123431961 | 12.4657 | 9.1484  | 1.0816  |
| CHB | TBC1D3 | 123436961 | 15.7567 | 11.1814 | 1.2371  |
| CHB | TBC1D3 | 123441961 | 19.8813 | 12.3673 | 1.8479  |
| CHB | TBC1D3 | 123446961 | 23.0579 | 13.3838 | 2.2079  |
| CHB | TBC1D3 | 123451961 | 16.1546 | 10.3343 | 1.6942  |
| CHB | TBC1D3 | 123456961 | 12.0541 | 10.5037 | 0.4445  |
| CHB | TBC1D3 | 123461961 | 14.0432 | 10.8426 | 0.8907  |
| CHB | TBC1D3 | 123466961 | 16.177  | 8.8096  | 2.4874  |
| CHB | TBC1D3 | 123471961 | 9.1076  | 5.9295  | 1.5386  |
| CHB | TBC1D3 | 123476961 | 3.692   | 5.2519  | -0.8413 |
| CHB | TBC1D3 | 123481961 | 6.2273  | 7.4543  | -0.483  |
| CHB | TBC1D3 | 123486961 | 8.2147  | 7.1154  | 0.4514  |
| CHB | TBC1D3 | 123491961 | 9.3992  | 8.6402  | 0.2609  |
| CHB | TBC1D3 | 123496961 | 9.8909  | 10.3343 | -0.1291 |
| CHB | TBC1D3 | 123501961 | 7.3764  | 9.4872  | -0.6654 |

## 2\_TajimasD\_data

|     |        |           |         |         |         |
|-----|--------|-----------|---------|---------|---------|
| CHB | TBC1D3 | 123506961 | 7.3027  | 10.5037 | -0.9177 |
| CHB | TBC1D3 | 123511961 | 7.4927  | 10.6731 | -0.8983 |
| CHB | TBC1D3 | 123516961 | 8.2037  | 10.6731 | -0.6975 |
| CHB | TBC1D3 | 123521961 | 10.7615 | 12.5367 | -0.431  |
| CHB | TBC1D3 | 123526961 | 7.2846  | 9.6567  | -0.7355 |
| CHB | TBC1D3 | 123531961 | 7.9634  | 8.4708  | -0.1776 |
| CHB | TBC1D3 | 123536961 | 18.8365 | 12.8755 | 1.4112  |
| CHB | TBC1D3 | 123541961 | 14.8686 | 12.7061 | 0.5184  |
| CHB | TBC1D3 | 123546961 | 7.1534  | 9.6567  | -0.7762 |
| CHB | TBC1D3 | 123551961 | 7.0177  | 8.4708  | -0.5087 |
| CHB | TBC1D3 | 123556961 | 4.7076  | 7.7931  | -1.1662 |
| CHB | TBC1D3 | 123561961 | 4.246   | 7.1154  | -1.1784 |
| CHB | TBC1D3 | 123566961 | 6.556   | 11.1814 | -1.2507 |
| CHB | TBC1D3 | 123571961 | 8.9845  | 12.1979 | -0.8006 |
| CHB | TBC1D3 | 123576961 | 6.08    | 7.6237  | -0.5953 |
| CHB | TBC1D3 | 123581961 | 3.718   | 7.7931  | -1.5402 |
| CHB | TBC1D3 | 123586961 | 4.5307  | 9.8261  | -1.6156 |
| CHB | TBC1D3 | 123591961 | 4.8205  | 9.9955  | -1.554  |
| CHB | TBC1D3 | 123596961 | 5.9834  | 8.979   | -0.9937 |
| CHB | TBC1D3 | 123601961 | 8.7474  | 8.4708  | 0.0968  |
| CHB | TBC1D3 | 123606961 | 12.1662 | 10.5037 | 0.4766  |
| CHB | TBC1D3 | 123611961 | 9.4477  | 9.9955  | -0.1645 |
| CHB | TBC1D3 | 123616961 | 3.5035  | 8.3013  | -1.7111 |
| CHB | TBC1D3 | 123621961 | 6.7144  | 10.5037 | -1.0864 |
| CHB | TBC1D3 | 123626961 | 7.5682  | 8.6402  | -0.3685 |
| CHB | TBC1D3 | 123631961 | 5.6552  | 6.0989  | -0.2094 |
| CHB | TBC1D3 | 123636961 | 5.9235  | 6.946   | -0.4292 |
| CHB | TBC1D3 | 123641961 | 4.8399  | 6.7766  | -0.8314 |
| CHB | TBC1D3 | 123646961 | 5.9522  | 7.4543  | -0.5913 |
| CHB | TBC1D3 | 123651961 | 4.952   | 6.4378  | -0.6681 |
| CHB | TBC1D3 | 123656961 | 5.6196  | 6.6072  | -0.4338 |
| YRI | TBC1D3 | 122546961 | 10.7973 | 15.1256 | -0.8764 |
| YRI | TBC1D3 | 122551961 | 12.5038 | 13.2769 | -0.1772 |
| YRI | TBC1D3 | 122556961 | 12.2822 | 11.4282 | 0.2255  |
| YRI | TBC1D3 | 122561961 | 11.1335 | 12.4366 | -0.3177 |
| YRI | TBC1D3 | 122566961 | 9.994   | 13.1089 | -0.7226 |
| YRI | TBC1D3 | 122571961 | 8.1051  | 10.4199 | -0.6664 |
| YRI | TBC1D3 | 122576961 | 10.4778 | 11.9324 | -0.3687 |
| YRI | TBC1D3 | 122581961 | 13.83   | 15.9659 | -0.4108 |
| YRI | TBC1D3 | 122586961 | 14.3107 | 15.6298 | -0.2589 |
| YRI | TBC1D3 | 122591961 | 14.2452 | 12.9408 | 0.3063  |
| YRI | TBC1D3 | 122596961 | 17.7305 | 16.134  | 0.304   |
| YRI | TBC1D3 | 122601961 | 16.9893 | 17.1423 | -0.0275 |
| YRI | TBC1D3 | 122606961 | 14.3516 | 15.2937 | -0.1888 |
| YRI | TBC1D3 | 122611961 | 15.748  | 15.6298 | 0.0232  |
| YRI | TBC1D3 | 122616961 | 21.5576 | 16.8062 | 0.87    |
| YRI | TBC1D3 | 122621961 | 21.1096 | 16.302  | 0.9063  |
| YRI | TBC1D3 | 122626961 | 12.9855 | 13.1089 | -0.0286 |
| YRI | TBC1D3 | 122631961 | 12.713  | 12.2685 | 0.1098  |

## 2\_TajimasD\_data

|     |        |           |         |         |         |
|-----|--------|-----------|---------|---------|---------|
| YRI | TBC1D3 | 122636961 | 12.9888 | 11.4282 | 0.412   |
| YRI | TBC1D3 | 122641961 | 11.0118 | 13.1089 | -0.4865 |
| YRI | TBC1D3 | 122646961 | 12.3174 | 14.9575 | -0.5403 |
| YRI | TBC1D3 | 122651961 | 14.3225 | 13.445  | 0.1987  |
| YRI | TBC1D3 | 122656961 | 15.0348 | 13.2769 | 0.4029  |
| YRI | TBC1D3 | 122661961 | 18.3343 | 15.9659 | 0.4555  |
| YRI | TBC1D3 | 122666961 | 20.7611 | 20.1675 | 0.0912  |
| YRI | TBC1D3 | 122671961 | 16.1587 | 18.991  | -0.4612 |
| YRI | TBC1D3 | 122676961 | 18.7677 | 20.3355 | -0.239  |
| YRI | TBC1D3 | 122681961 | 21.0066 | 21.68   | -0.0965 |
| YRI | TBC1D3 | 122686961 | 14.3319 | 16.6382 | -0.4264 |
| YRI | TBC1D3 | 122691961 | 17.7078 | 19.1591 | -0.2343 |
| YRI | TBC1D3 | 122696961 | 24.9532 | 22.3523 | 0.3619  |
| YRI | TBC1D3 | 122701961 | 31.5101 | 21.8481 | 1.3746  |
| YRI | TBC1D3 | 122706961 | 23.5334 | 17.3104 | 1.1077  |
| YRI | TBC1D3 | 122711961 | 11.6337 | 13.445  | -0.4102 |
| YRI | TBC1D3 | 122716961 | 9.1464  | 13.9492 | -1.0504 |
| YRI | TBC1D3 | 122721961 | 8.3959  | 14.1172 | -1.2371 |
| YRI | TBC1D3 | 122726961 | 8.5004  | 13.9492 | -1.1917 |
| YRI | TBC1D3 | 122731961 | 6.4933  | 13.2769 | -1.5547 |
| YRI | TBC1D3 | 122736961 | 7.7154  | 12.6047 | -1.177  |
| YRI | TBC1D3 | 122741961 | 11.1    | 14.7895 | -0.7633 |
| YRI | TBC1D3 | 122746961 | 8.9395  | 14.6214 | -1.1883 |
| YRI | TBC1D3 | 122751961 | 5.8855  | 12.6047 | -1.6175 |
| YRI | TBC1D3 | 122756961 | 8.8452  | 15.4617 | -1.312  |
| YRI | TBC1D3 | 122761961 | 10.1992 | 14.9575 | -0.9738 |
| YRI | TBC1D3 | 122766961 | 10.1421 | 13.613  | -0.7769 |
| YRI | TBC1D3 | 122771961 | 9.4686  | 13.1089 | -0.8444 |
| YRI | TBC1D3 | 122776961 | 12.4735 | 13.445  | -0.22   |
| YRI | TBC1D3 | 122781961 | 13.8551 | 14.1172 | -0.0567 |
| YRI | TBC1D3 | 122786961 | 10.8111 | 13.1089 | -0.533  |
| YRI | TBC1D3 | 122791961 | 9.1508  | 13.1089 | -0.9181 |
| YRI | TBC1D3 | 122796961 | 9.1926  | 12.4366 | -0.7909 |
| YRI | TBC1D3 | 122801961 | 16.0907 | 13.613  | 0.5546  |
| YRI | TBC1D3 | 122806961 | 18.1391 | 13.445  | 1.0631  |
| YRI | TBC1D3 | 122811961 | 12.5955 | 9.9157  | 0.808   |
| YRI | TBC1D3 | 122816961 | 11.5343 | 9.0754  | 0.8049  |
| YRI | TBC1D3 | 122821961 | 10.4758 | 9.7476  | 0.2231  |
| YRI | TBC1D3 | 122826961 | 8.3005  | 9.4115  | -0.3516 |
| YRI | TBC1D3 | 122831961 | 7.037   | 10.4199 | -0.9738 |
| YRI | TBC1D3 | 122836961 | 6.3776  | 11.7644 | -1.3839 |
| YRI | TBC1D3 | 122841961 | 8.1023  | 12.2685 | -1.0288 |
| YRI | TBC1D3 | 122846961 | 7.7709  | 10.5879 | -0.7989 |
| YRI | TBC1D3 | 122851961 | 6.1306  | 10.4199 | -1.2348 |
| YRI | TBC1D3 | 122856961 | 8.047   | 10.5879 | -0.7206 |
| YRI | TBC1D3 | 122861961 | 9.2445  | 9.5795  | -0.1043 |
| YRI | TBC1D3 | 122866961 | 7.8985  | 10.5879 | -0.7627 |
| YRI | TBC1D3 | 122871961 | 9.6365  | 11.7644 | -0.5467 |
| YRI | TBC1D3 | 122876961 | 11.2195 | 14.4534 | -0.6838 |

## 2\_TajimasD\_data

|     |        |           |         |         |         |
|-----|--------|-----------|---------|---------|---------|
| YRI | TBC1D3 | 122881961 | 9.2726  | 15.7978 | -1.2676 |
| YRI | TBC1D3 | 122886961 | 9.8671  | 15.2937 | -1.0873 |
| YRI | TBC1D3 | 122891961 | 10.5503 | 13.7811 | -0.7148 |
| YRI | TBC1D3 | 122896961 | 10.5531 | 12.7727 | -0.5277 |
| YRI | TBC1D3 | 122901961 | 10.3854 | 11.9324 | -0.3922 |
| YRI | TBC1D3 | 122906961 | 7.5312  | 11.2602 | -0.9983 |
| YRI | TBC1D3 | 122911961 | 6.7452  | 10.4199 | -1.0578 |
| YRI | TBC1D3 | 122916961 | 6.5898  | 9.0754  | -0.8137 |
| YRI | TBC1D3 | 122921961 | 7.4978  | 11.2602 | -1.0072 |
| YRI | TBC1D3 | 122926961 | 8.1263  | 11.7644 | -0.9346 |
| YRI | TBC1D3 | 122931961 | 6.3761  | 9.7476  | -1.0328 |
| YRI | TBC1D3 | 122936961 | 7.9755  | 10.756  | -0.777  |
| YRI | TBC1D3 | 122941961 | 9.9562  | 11.9324 | -0.501  |
| YRI | TBC1D3 | 122946961 | 8.1864  | 11.7644 | -0.9192 |
| YRI | TBC1D3 | 122951961 | 6.8173  | 11.0921 | -1.1606 |
| YRI | TBC1D3 | 122956961 | 7.85    | 12.4366 | -1.1182 |
| YRI | TBC1D3 | 122961961 | 11.46   | 18.6549 | -1.192  |
| YRI | TBC1D3 | 122966961 | 12.2106 | 17.4785 | -0.929  |
| YRI | TBC1D3 | 122971961 | 9.5549  | 12.4366 | -0.7026 |
| YRI | TBC1D3 | 122976961 | 7.8505  | 11.4282 | -0.9445 |
| YRI | TBC1D3 | 122981961 | 6.8718  | 10.2518 | -0.9879 |
| YRI | TBC1D3 | 122986961 | 7.1886  | 10.5879 | -0.964  |
| YRI | TBC1D3 | 122991961 | 8.1657  | 11.7644 | -0.9245 |
| YRI | TBC1D3 | 122996961 | 10.7117 | 13.445  | -0.619  |
| YRI | TBC1D3 | 123001961 | 14.615  | 15.4617 | -0.1679 |
| YRI | TBC1D3 | 123006961 | 13.5087 | 15.1256 | -0.3274 |
| YRI | TBC1D3 | 123011961 | 11.2755 | 13.9492 | -0.5847 |
| YRI | TBC1D3 | 123016961 | 13.6917 | 13.2769 | 0.0951  |
| YRI | TBC1D3 | 123021961 | 18.7174 | 16.302  | 0.4554  |
| YRI | TBC1D3 | 123026961 | 24.7079 | 21.0078 | 0.5467  |
| YRI | TBC1D3 | 123031961 | 19.4042 | 19.3272 | 0.0123  |
| YRI | TBC1D3 | 123036961 | 10.6839 | 15.1256 | -0.8994 |
| YRI | TBC1D3 | 123041961 | 8.8768  | 11.7644 | -0.7418 |
| YRI | TBC1D3 | 123046961 | 12.821  | 13.445  | -0.1413 |
| YRI | TBC1D3 | 123051961 | 14.7619 | 16.8062 | -0.3743 |
| YRI | TBC1D3 | 123056961 | 17.0852 | 21.68   | -0.6586 |
| YRI | TBC1D3 | 123061961 | 24.0336 | 32.2679 | -0.8019 |
| YRI | TBC1D3 | 123066961 | 24.8143 | 34.4528 | -0.8805 |
| YRI | TBC1D3 | 123071961 | 23.3699 | 29.4109 | -0.644  |
| YRI | TBC1D3 | 123076961 | 23.5704 | 29.2428 | -0.6081 |
| YRI | TBC1D3 | 123081961 | 18.4606 | 24.5371 | -0.7726 |
| YRI | TBC1D3 | 123086961 | 10.9393 | 17.4785 | -1.1532 |
| YRI | TBC1D3 | 123091961 | 11.1568 | 16.4701 | -0.9919 |
| YRI | TBC1D3 | 123096961 | 9.9487  | 14.9575 | -1.0251 |
| YRI | TBC1D3 | 123101961 | 7.6222  | 13.2769 | -1.296  |
| YRI | TBC1D3 | 123106961 | 7.2694  | 11.0921 | -1.0379 |
| YRI | TBC1D3 | 123111961 | 5.2265  | 9.9157  | -1.4138 |
| YRI | TBC1D3 | 123116961 | 4.6478  | 10.2518 | -1.6379 |
| YRI | TBC1D3 | 123121961 | 4.6179  | 7.7309  | -1.1812 |

## 2\_TajimasD\_data

|     |        |           |         |         |         |
|-----|--------|-----------|---------|---------|---------|
| YRI | TBC1D3 | 123126961 | 5.411   | 8.9073  | -1.1645 |
| YRI | TBC1D3 | 123131961 | 6.7992  | 12.2685 | -1.3506 |
| YRI | TBC1D3 | 123136961 | 7.5935  | 11.7644 | -1.0715 |
| YRI | TBC1D3 | 123141961 | 7.3417  | 9.7476  | -0.737  |
| YRI | TBC1D3 | 123146961 | 8.9172  | 9.9157  | -0.301  |
| YRI | TBC1D3 | 123151961 | 8.9365  | 12.7727 | -0.912  |
| YRI | TBC1D3 | 123156961 | 9.8084  | 17.1423 | -1.3177 |
| YRI | TBC1D3 | 123161961 | 9.3548  | 16.4701 | -1.3283 |
| YRI | TBC1D3 | 123166961 | 9.6762  | 14.2853 | -0.9855 |
| YRI | TBC1D3 | 123171961 | 14.1738 | 14.9575 | -0.1604 |
| YRI | TBC1D3 | 123176961 | 26.4356 | 19.4952 | 1.1021  |
| YRI | TBC1D3 | 123181961 | 33.3038 | 22.1842 | 1.5588  |
| YRI | TBC1D3 | 123186961 | 19.8499 | 17.3104 | 0.452   |
| YRI | TBC1D3 | 123191961 | 7.4104  | 13.445  | -1.3667 |
| YRI | TBC1D3 | 123196961 | 5.9084  | 12.7727 | -1.6319 |
| YRI | TBC1D3 | 123201961 | 7.568   | 13.613  | -1.353  |
| YRI | TBC1D3 | 123206961 | 6.9822  | 12.7727 | -1.3766 |
| YRI | TBC1D3 | 123211961 | 9.9598  | 15.4617 | -1.091  |
| YRI | TBC1D3 | 123216961 | 10.6295 | 16.6382 | -1.1109 |
| YRI | TBC1D3 | 123221961 | 7.1876  | 12.6047 | -1.304  |
| YRI | TBC1D3 | 123226961 | 7.8786  | 13.7811 | -1.3058 |
| YRI | TBC1D3 | 123231961 | 7.984   | 15.1256 | -1.4461 |
| YRI | TBC1D3 | 123236961 | 8.3302  | 13.613  | -1.1824 |
| YRI | TBC1D3 | 123241961 | 11.9285 | 14.1172 | -0.4733 |
| YRI | TBC1D3 | 123246961 | 13.7574 | 17.1423 | -0.6082 |
| YRI | TBC1D3 | 123251961 | 11.4296 | 17.3104 | -1.0468 |
| YRI | TBC1D3 | 123256961 | 10.0312 | 13.445  | -0.7731 |
| YRI | TBC1D3 | 123261961 | 10.1297 | 12.6047 | -0.5958 |
| YRI | TBC1D3 | 123266961 | 11.3693 | 14.1172 | -0.5942 |
| YRI | TBC1D3 | 123271961 | 12.7607 | 13.1089 | -0.0808 |
| YRI | TBC1D3 | 123276961 | 12.914  | 14.1172 | -0.2602 |
| YRI | TBC1D3 | 123281961 | 14.1925 | 17.3104 | -0.555  |
| YRI | TBC1D3 | 123286961 | 12.7343 | 16.4701 | -0.6974 |
| YRI | TBC1D3 | 123291961 | 8.1191  | 13.2769 | -1.1821 |
| YRI | TBC1D3 | 123296961 | 6.9499  | 11.4282 | -1.1823 |
| YRI | TBC1D3 | 123301961 | 9.9781  | 11.9324 | -0.4954 |
| YRI | TBC1D3 | 123306961 | 11.415  | 12.4366 | -0.2491 |
| YRI | TBC1D3 | 123311961 | 11.0678 | 10.924  | 0.0396  |
| YRI | TBC1D3 | 123316961 | 10.7064 | 10.756  | -0.0139 |
| YRI | TBC1D3 | 123321961 | 10.2291 | 12.4366 | -0.5382 |
| YRI | TBC1D3 | 123326961 | 10.0775 | 11.4282 | -0.3566 |
| YRI | TBC1D3 | 123331961 | 10.9764 | 11.5963 | -0.1614 |
| YRI | TBC1D3 | 123336961 | 9.3221  | 11.9324 | -0.6617 |
| YRI | TBC1D3 | 123341961 | 7.9453  | 13.1089 | -1.1978 |
| YRI | TBC1D3 | 123346961 | 7.8112  | 12.2685 | -1.1007 |
| YRI | TBC1D3 | 123351961 | 7.1136  | 9.4115  | -0.7273 |
| YRI | TBC1D3 | 123356961 | 5.6591  | 8.5712  | -1.005  |
| YRI | TBC1D3 | 123361961 | 6.645   | 11.2602 | -1.2355 |
| YRI | TBC1D3 | 123366961 | 9.4203  | 13.2769 | -0.8839 |

## 2\_TajimasD\_data

|     |        |           |         |         |         |
|-----|--------|-----------|---------|---------|---------|
| YRI | TBC1D3 | 123371961 | 8.8679  | 10.5879 | -0.4878 |
| YRI | TBC1D3 | 123376961 | 7.9168  | 12.1005 | -1.0467 |
| YRI | TBC1D3 | 123381961 | 7.6147  | 12.2685 | -1.1492 |
| YRI | TBC1D3 | 123386961 | 7.1779  | 9.4115  | -0.7069 |
| YRI | TBC1D3 | 123391961 | 7.7222  | 10.924  | -0.8818 |
| YRI | TBC1D3 | 123396961 | 7.9963  | 13.7811 | -1.2798 |
| YRI | TBC1D3 | 123401961 | 9.9416  | 16.4701 | -1.2188 |
| YRI | TBC1D3 | 123406961 | 12.7031 | 18.823  | -1.0052 |
| YRI | TBC1D3 | 123411961 | 12.2057 | 16.9743 | -0.8649 |
| YRI | TBC1D3 | 123416961 | 8.4241  | 12.7727 | -1.0338 |
| YRI | TBC1D3 | 123421961 | 4.4189  | 11.4282 | -1.8505 |
| YRI | TBC1D3 | 123426961 | 4.3726  | 11.4282 | -1.8627 |
| YRI | TBC1D3 | 123431961 | 10.7829 | 14.9575 | -0.8544 |
| YRI | TBC1D3 | 123436961 | 15.9636 | 16.4701 | -0.0946 |
| YRI | TBC1D3 | 123441961 | 20.8073 | 16.9743 | 0.6952  |
| YRI | TBC1D3 | 123446961 | 24.2398 | 19.9994 | 0.657   |
| YRI | TBC1D3 | 123451961 | 20.69   | 18.823  | 0.3066  |
| YRI | TBC1D3 | 123456961 | 16.2058 | 17.3104 | -0.1966 |
| YRI | TBC1D3 | 123461961 | 17.0871 | 16.6382 | 0.083   |
| YRI | TBC1D3 | 123466961 | 18.7924 | 14.2853 | 0.9637  |
| YRI | TBC1D3 | 123471961 | 11.3813 | 10.924  | 0.1259  |
| YRI | TBC1D3 | 123476961 | 5.7171  | 8.9073  | -1.0625 |
| YRI | TBC1D3 | 123481961 | 7.5361  | 10.2518 | -0.7937 |
| YRI | TBC1D3 | 123486961 | 8.1729  | 11.9324 | -0.953  |
| YRI | TBC1D3 | 123491961 | 9.5529  | 12.9408 | -0.7955 |
| YRI | TBC1D3 | 123496961 | 10.3704 | 14.2853 | -0.837  |
| YRI | TBC1D3 | 123501961 | 7.2915  | 13.9492 | -1.456  |
| YRI | TBC1D3 | 123506961 | 8.9882  | 17.4785 | -1.4973 |
| YRI | TBC1D3 | 123511961 | 13.9953 | 22.8565 | -1.2068 |
| YRI | TBC1D3 | 123516961 | 13.7472 | 18.4868 | -0.7921 |
| YRI | TBC1D3 | 123521961 | 10.9388 | 12.6047 | -0.401  |
| YRI | TBC1D3 | 123526961 | 8.4783  | 12.7727 | -1.0209 |
| YRI | TBC1D3 | 123531961 | 12.669  | 15.6298 | -0.5811 |
| YRI | TBC1D3 | 123536961 | 22.1577 | 19.8313 | 0.3634  |
| YRI | TBC1D3 | 123541961 | 20.4129 | 23.0245 | -0.3532 |
| YRI | TBC1D3 | 123546961 | 15.7828 | 21.1758 | -0.7908 |
| YRI | TBC1D3 | 123551961 | 16.9614 | 16.9743 | -0.0023 |
| YRI | TBC1D3 | 123556961 | 14.1206 | 14.6214 | -0.1047 |
| YRI | TBC1D3 | 123561961 | 10.1166 | 13.7811 | -0.8107 |
| YRI | TBC1D3 | 123566961 | 16.1527 | 18.823  | -0.4386 |
| YRI | TBC1D3 | 123571961 | 19.0008 | 20.1675 | -0.1793 |
| YRI | TBC1D3 | 123576961 | 12.537  | 15.6298 | -0.607  |
| YRI | TBC1D3 | 123581961 | 12.1341 | 15.4617 | -0.6598 |
| YRI | TBC1D3 | 123586961 | 13.2953 | 15.2937 | -0.4004 |
| YRI | TBC1D3 | 123591961 | 13.5724 | 14.7895 | -0.2518 |
| YRI | TBC1D3 | 123596961 | 13.9246 | 16.134  | -0.4207 |
| YRI | TBC1D3 | 123601961 | 12.3355 | 15.1256 | -0.565  |
| YRI | TBC1D3 | 123606961 | 14.9615 | 13.9492 | 0.2214  |
| YRI | TBC1D3 | 123611961 | 14.9329 | 13.2769 | 0.3795  |

## 2\_TajimasD\_data

|     |        |           |         |         |         |
|-----|--------|-----------|---------|---------|---------|
| YRI | TBC1D3 | 123616961 | 10.1627 | 12.1005 | -0.4848 |
| YRI | TBC1D3 | 123621961 | 13.5915 | 14.9575 | -0.2796 |
| YRI | TBC1D3 | 123626961 | 14.5681 | 15.9659 | -0.2688 |
| YRI | TBC1D3 | 123631961 | 9.8107  | 14.6214 | -1.0061 |
| YRI | TBC1D3 | 123636961 | 7.924   | 12.6047 | -1.1268 |
| YRI | TBC1D3 | 123641961 | 8.4026  | 13.2769 | -1.1171 |
| YRI | TBC1D3 | 123646961 | 9.5415  | 12.7727 | -0.7682 |
| YRI | TBC1D3 | 123651961 | 7.2743  | 9.2434  | -0.6337 |
| YRI | TBC1D3 | 123656961 | 9.2285  | 10.756  | -0.4269 |
| CEU | TBC1D3 | 64264484  | 6.5286  | 8.0164  | -0.5495 |
| CEU | TBC1D3 | 64269484  | 4.2175  | 6.8225  | -1.1147 |
| CEU | TBC1D3 | 64274484  | 4.7347  | 7.6753  | -1.1303 |
| CEU | TBC1D3 | 64279484  | 5.9454  | 9.2104  | -1.0609 |
| CEU | TBC1D3 | 64284484  | 4.565   | 7.8459  | -1.236  |
| CEU | TBC1D3 | 64289484  | 4.6858  | 7.8459  | -1.1905 |
| CEU | TBC1D3 | 64294484  | 6.2068  | 8.187   | -0.7174 |
| CEU | TBC1D3 | 64299484  | 5.2931  | 6.6519  | -0.5949 |
| CEU | TBC1D3 | 64304484  | 4.47    | 5.7991  | -0.6583 |
| CEU | TBC1D3 | 64309484  | 7.0142  | 7.5047  | -0.1924 |
| CEU | TBC1D3 | 64314484  | 7.3502  | 9.3809  | -0.6487 |
| CEU | TBC1D3 | 64319484  | 5.3925  | 6.9931  | -0.6697 |
| CEU | TBC1D3 | 64324484  | 3.7967  | 5.458   | -0.8685 |
| CEU | TBC1D3 | 64329484  | 3.711   | 6.3108  | -1.1936 |
| CEU | TBC1D3 | 64334484  | 4.2952  | 5.7991  | -0.7449 |
| CEU | TBC1D3 | 64339484  | 7.3197  | 8.3576  | -0.3689 |
| CEU | TBC1D3 | 64344484  | 8.8953  | 10.2337 | -0.3943 |
| CEU | TBC1D3 | 64349484  | 5.6648  | 8.6987  | -1.0394 |
| CEU | TBC1D3 | 64354484  | 4.5321  | 6.3108  | -0.8166 |
| CEU | TBC1D3 | 64359484  | 3.9936  | 4.2641  | -0.1756 |
| CEU | TBC1D3 | 64364484  | 2.3067  | 3.9229  | -1.1273 |
| CEU | TBC1D3 | 64369484  | 1.9728  | 4.6052  | -1.5982 |
| CEU | TBC1D3 | 64374484  | 2.5395  | 4.6052  | -1.2542 |
| CEU | TBC1D3 | 64379484  | 2.2486  | 3.2407  | -0.8135 |
| CEU | TBC1D3 | 64384484  | 2.6252  | 3.5818  | -0.721  |
| CEU | TBC1D3 | 64389484  | 3.2814  | 3.7524  | -0.3412 |
| CEU | TBC1D3 | 64394484  | 3.9936  | 4.0935  | -0.0672 |
| CEU | TBC1D3 | 64399484  | 6.5784  | 5.6286  | 0.4831  |
| CEU | TBC1D3 | 64404484  | 8.878   | 6.1402  | 1.2883  |
| CEU | TBC1D3 | 64409484  | 7.2111  | 4.6052  | 1.5822  |
| CEU | TBC1D3 | 64414484  | 7.0715  | 4.7757  | 1.3503  |
| CEU | TBC1D3 | 64419484  | 9.9072  | 5.7991  | 2.0347  |
| CEU | TBC1D3 | 64424484  | 12.8371 | 6.9931  | 2.4452  |
| CEU | TBC1D3 | 64429484  | 12.8901 | 7.3342  | 2.2261  |
| CEU | TBC1D3 | 64434484  | 9.8312  | 5.6286  | 2.1377  |
| CEU | TBC1D3 | 64439484  | 8.9938  | 5.9697  | 1.4595  |
| CEU | TBC1D3 | 64444484  | 9.113   | 6.8225  | 0.9801  |
| CEU | TBC1D3 | 64449484  | 7.5576  | 7.8459  | -0.1086 |
| CEU | TBC1D3 | 64454484  | 3.9136  | 7.1636  | -1.3304 |
| CEU | TBC1D3 | 64459484  | 3.6094  | 8.6987  | -1.7436 |

## 2\_TajimasD\_data

|     |        |          |         |         |         |
|-----|--------|----------|---------|---------|---------|
| CEU | TBC1D3 | 64464484 | 4.678   | 8.6987  | -1.3775 |
| CEU | TBC1D3 | 64469484 | 4.6312  | 6.8225  | -0.9377 |
| CEU | TBC1D3 | 64474484 | 4.7083  | 6.4814  | -0.7947 |
| CEU | TBC1D3 | 64479484 | 4.1078  | 5.7991  | -0.8377 |
| CEU | TBC1D3 | 64484484 | 4.9843  | 7.1636  | -0.8921 |
| CEU | TBC1D3 | 64489484 | 3.4463  | 6.3108  | -1.3151 |
| CEU | TBC1D3 | 64494484 | 2.5627  | 5.458   | -1.5136 |
| CEU | TBC1D3 | 64499484 | 3.1081  | 5.2874  | -1.1718 |
| CEU | TBC1D3 | 64504484 | 3.4523  | 5.458   | -1.0485 |
| CEU | TBC1D3 | 64509484 | 3.6807  | 5.458   | -0.9291 |
| CEU | TBC1D3 | 64514484 | 3.6557  | 4.2641  | -0.3949 |
| CEU | TBC1D3 | 64519484 | 3.763   | 4.0935  | -0.2222 |
| CEU | TBC1D3 | 64524484 | 3.6074  | 4.7757  | -0.6871 |
| CEU | TBC1D3 | 64529484 | 5.1148  | 5.9697  | -0.4126 |
| CEU | TBC1D3 | 64534484 | 6.8174  | 8.0164  | -0.4429 |
| CEU | TBC1D3 | 64539484 | 9.7823  | 8.3576  | 0.5064  |
| CEU | TBC1D3 | 64544484 | 10.7904 | 7.6753  | 1.1974  |
| CEU | TBC1D3 | 64549484 | 8.3509  | 6.9931  | 0.5681  |
| CEU | TBC1D3 | 64554484 | 5.3952  | 5.6286  | -0.1187 |
| CEU | TBC1D3 | 64559484 | 3.758   | 4.9463  | -0.6777 |
| CEU | TBC1D3 | 64564484 | 6.6454  | 6.4814  | 0.0735  |
| CEU | TBC1D3 | 64569484 | 7.0684  | 6.8225  | 0.1052  |
| CEU | TBC1D3 | 64574484 | 4.3678  | 4.7757  | -0.2399 |
| CEU | TBC1D3 | 64579484 | 4.7873  | 5.1169  | -0.1824 |
| CEU | TBC1D3 | 64584484 | 5.2455  | 6.1402  | -0.421  |
| CEU | TBC1D3 | 64589484 | 4.3577  | 4.9463  | -0.3357 |
| CEU | TBC1D3 | 64594484 | 4.9235  | 4.0935  | 0.5581  |
| CEU | TBC1D3 | 64599484 | 9.0989  | 5.9697  | 1.5102  |
| CEU | TBC1D3 | 64604484 | 8.7994  | 6.9931  | 0.7558  |
| CEU | TBC1D3 | 64609484 | 6.2325  | 8.8692  | -0.8873 |
| CEU | TBC1D3 | 64614484 | 6.9186  | 8.5281  | -0.5616 |
| CEU | TBC1D3 | 64619484 | 6.8631  | 5.9697  | 0.4312  |
| CEU | TBC1D3 | 64624484 | 7.4335  | 6.6519  | 0.3422  |
| CEU | TBC1D3 | 64629484 | 5.517   | 7.1636  | -0.674  |
| CEU | TBC1D3 | 64634484 | 4.235   | 6.1402  | -0.8965 |
| CEU | TBC1D3 | 64639484 | 4.7135  | 6.1402  | -0.6714 |
| CEU | TBC1D3 | 64644484 | 4.8922  | 6.1402  | -0.5873 |
| CEU | TBC1D3 | 64649484 | 4.9946  | 4.9463  | 0.0275  |
| CEU | TBC1D3 | 64654484 | 4.8013  | 5.2874  | -0.2614 |
| CEU | TBC1D3 | 64659484 | 11.1983 | 8.3576  | 1.0098  |
| CEU | TBC1D3 | 64664484 | 22.1358 | 14.4978 | 1.6204  |
| CEU | TBC1D3 | 64669484 | 20.3257 | 15.6917 | 0.9117  |
| CEU | TBC1D3 | 64674484 | 10.5292 | 10.0632 | 0.1395  |
| CEU | TBC1D3 | 64679484 | 6.6228  | 6.3108  | 0.1432  |
| CEU | TBC1D3 | 64684484 | 4.108   | 5.7991  | -0.8376 |
| CEU | TBC1D3 | 64689484 | 4.672   | 7.1636  | -1.0199 |
| CEU | TBC1D3 | 64694484 | 7.8701  | 8.5281  | -0.2296 |
| CEU | TBC1D3 | 64699484 | 13.8579 | 11.2571 | 0.7008  |
| CEU | TBC1D3 | 64704484 | 14.1374 | 10.5749 | 1.0179  |



## 2\_TajimasD\_data

|     |        |          |         |         |         |
|-----|--------|----------|---------|---------|---------|
| CEU | TBC1D3 | 64709484 | 10.8584 | 9.5515  | 0.4106  |
| CEU | TBC1D3 | 64714484 | 14.8893 | 10.5749 | 1.2327  |
| CEU | TBC1D3 | 64719484 | 17.3105 | 9.8926  | 2.2555  |
| CEU | TBC1D3 | 64724484 | 15.3347 | 10.5749 | 1.36    |
| CEU | TBC1D3 | 64729484 | 12.7577 | 8.6987  | 1.3906  |
| CEU | TBC1D3 | 64734484 | 12.7561 | 8.0164  | 1.7506  |
| CEU | TBC1D3 | 64739484 | 15.1859 | 9.2104  | 1.9417  |
| CEU | TBC1D3 | 64744484 | 15.6979 | 10.916  | 1.3263  |
| CEU | TBC1D3 | 64749484 | 16.3229 | 13.645  | 0.6018  |
| CEU | TBC1D3 | 64754484 | 14.0134 | 11.2571 | 0.7427  |
| CEU | TBC1D3 | 64759484 | 11.8683 | 10.4043 | 0.4247  |
| CEU | TBC1D3 | 64764484 | 8.0658  | 8.3576  | -0.1037 |
| CEU | TBC1D3 | 64769484 | 4.6516  | 6.9931  | -0.9797 |
| CEU | TBC1D3 | 64774484 | 5.384   | 8.187   | -1.0155 |
| CEU | TBC1D3 | 64779484 | 5.9076  | 7.8459  | -0.7302 |
| CEU | TBC1D3 | 64784484 | 8.4362  | 8.0164  | 0.1551  |
| CEU | TBC1D3 | 64789484 | 6.8827  | 6.3108  | 0.2626  |
| CEU | TBC1D3 | 64794484 | 5.3979  | 6.4814  | -0.4856 |
| CEU | TBC1D3 | 64799484 | 6.516   | 6.6519  | -0.0595 |
| CEU | TBC1D3 | 64804484 | 5.7714  | 6.9931  | -0.5112 |
| CEU | TBC1D3 | 64809484 | 3.6213  | 6.3108  | -1.2348 |
| CEU | TBC1D3 | 64814484 | 3.9274  | 5.6286  | -0.8653 |
| CEU | TBC1D3 | 64819484 | 7.4197  | 6.6519  | 0.3362  |
| CEU | TBC1D3 | 64824484 | 4.7551  | 4.2641  | 0.3187  |
| CEU | TBC1D3 | 64829484 | 3.8532  | 4.4346  | -0.3648 |
| CEU | TBC1D3 | 64834484 | 6.0192  | 6.8225  | -0.3437 |
| CEU | TBC1D3 | 64839484 | 4.4875  | 6.9931  | -1.0484 |
| CEU | TBC1D3 | 64844484 | 3.1723  | 6.1402  | -1.3966 |
| CEU | TBC1D3 | 64849484 | 3.9722  | 6.9931  | -1.264  |
| CEU | TBC1D3 | 64854484 | 5.4106  | 7.6753  | -0.8705 |
| CEU | TBC1D3 | 64859484 | 5.5648  | 7.3342  | -0.7089 |
| CEU | TBC1D3 | 64864484 | 5.8532  | 7.3342  | -0.5934 |
| CEU | TBC1D3 | 64869484 | 4.8518  | 6.4814  | -0.7304 |
| CEU | TBC1D3 | 64874484 | 4.5883  | 6.1402  | -0.7303 |
| CEU | TBC1D3 | 64879484 | 5.9464  | 6.3108  | -0.1673 |
| CEU | TBC1D3 | 64884484 | 6.986   | 9.0398  | -0.679  |
| CEU | TBC1D3 | 64889484 | 6.7765  | 9.3809  | -0.832  |
| CEU | TBC1D3 | 64894484 | 9.9749  | 9.3809  | 0.1898  |
| CEU | TBC1D3 | 64899484 | 10.4273 | 9.5515  | 0.2751  |
| CEU | TBC1D3 | 64904484 | 5.4022  | 8.0164  | -0.9656 |
| CEU | TBC1D3 | 64909484 | 7.7044  | 9.8926  | -0.6654 |
| CEU | TBC1D3 | 64914484 | 12.1088 | 11.2571 | 0.2295  |
| CEU | TBC1D3 | 64919484 | 13.0895 | 11.2571 | 0.4938  |
| CEU | TBC1D3 | 64924484 | 13.5756 | 9.7221  | 1.1909  |
| CEU | TBC1D3 | 64929484 | 11.6825 | 8.187   | 1.2663  |
| CEU | TBC1D3 | 64934484 | 15.0447 | 9.7221  | 1.6449  |
| CEU | TBC1D3 | 64939484 | 17.7095 | 10.916  | 1.8842  |
| CEU | TBC1D3 | 64944484 | 15.6446 | 11.2571 | 1.1823  |
| CEU | TBC1D3 | 64949484 | 11.4127 | 8.3576  | 1.086   |

## 2\_TajimasD\_data

|     |        |          |         |         |         |
|-----|--------|----------|---------|---------|---------|
| CEU | TBC1D3 | 64954484 | 9.8621  | 8.0164  | 0.6817  |
| CEU | TBC1D3 | 64959484 | 10.5232 | 9.5515  | 0.3053  |
| CEU | TBC1D3 | 64964484 | 5.0254  | 8.0164  | -1.1047 |
| CEU | TBC1D3 | 64969484 | 4.3665  | 6.9931  | -1.099  |
| CEU | TBC1D3 | 64974484 | 8.4016  | 7.3342  | 0.4277  |
| CEU | TBC1D3 | 64979484 | 9.8336  | 8.187   | 0.5965  |
| CEU | TBC1D3 | 64984484 | 8.6518  | 7.5047  | 0.4501  |
| CEU | TBC1D3 | 64989484 | 5.6751  | 6.8225  | -0.491  |
| CEU | TBC1D3 | 64994484 | 3.6803  | 5.6286  | -0.991  |
| CEU | TBC1D3 | 64999484 | 3.4467  | 4.2641  | -0.5306 |
| CEU | TBC1D3 | 65004484 | 6.4863  | 6.1402  | 0.1629  |
| CEU | TBC1D3 | 65009484 | 7.3824  | 8.3576  | -0.3467 |
| CEU | TBC1D3 | 65014484 | 7.6428  | 8.3576  | -0.2541 |
| CEU | TBC1D3 | 65019484 | 9.8497  | 7.6753  | 0.8358  |
| CEU | TBC1D3 | 65024484 | 11.5945 | 9.0398  | 0.8446  |
| CEU | TBC1D3 | 65029484 | 14.7242 | 12.7922 | 0.4615  |
| CEU | TBC1D3 | 65034484 | 17.7112 | 13.9861 | 0.8177  |
| CEU | TBC1D3 | 65039484 | 16.2426 | 11.5982 | 1.2169  |
| CEU | TBC1D3 | 65044484 | 11.382  | 8.5281  | 0.9958  |
| CEU | TBC1D3 | 65049484 | 11.3714 | 8.187   | 1.1536  |
| CEU | TBC1D3 | 65054484 | 13.8414 | 9.0398  | 1.5875  |
| CEU | TBC1D3 | 65059484 | 13.0402 | 8.6987  | 1.4874  |
| CEU | TBC1D3 | 65064484 | 11.2033 | 8.3576  | 1.0116  |
| CEU | TBC1D3 | 65069484 | 8.1633  | 7.1636  | 0.4092  |
| CEU | TBC1D3 | 65074484 | 7.5238  | 6.9931  | 0.2221  |
| CEU | TBC1D3 | 65079484 | 11.6351 | 10.2337 | 0.4129  |
| CEU | TBC1D3 | 65084484 | 9.819   | 9.8926  | -0.0224 |
| CEU | TBC1D3 | 65089484 | 5.3006  | 6.6519  | -0.5916 |
| CEU | TBC1D3 | 65094484 | 7.7576  | 8.8692  | -0.3741 |
| CEU | TBC1D3 | 65099484 | 7.7578  | 8.8692  | -0.374  |
| CEU | TBC1D3 | 65104484 | 5.1148  | 5.6286  | -0.2613 |
| CEU | TBC1D3 | 65109484 | 5.1841  | 5.6286  | -0.2261 |
| CEU | TBC1D3 | 65114484 | 4.1859  | 4.9463  | -0.4337 |
| CEU | TBC1D3 | 65119484 | 7.6307  | 5.2874  | 1.26    |
| CEU | TBC1D3 | 65124484 | 9.2858  | 6.4814  | 1.257   |
| CEU | TBC1D3 | 65129484 | 5.6243  | 5.2874  | 0.1812  |
| CEU | TBC1D3 | 65134484 | 6.4673  | 5.9697  | 0.2401  |
| CEU | TBC1D3 | 65139484 | 6.7152  | 7.6753  | -0.369  |
| CEU | TBC1D3 | 65144484 | 5.0629  | 6.8225  | -0.7529 |
| CEU | TBC1D3 | 65149484 | 5.6238  | 5.9697  | -0.1669 |
| CEU | TBC1D3 | 65154484 | 6.5628  | 6.1402  | 0.1989  |
| CEU | TBC1D3 | 65159484 | 7.8066  | 6.6519  | 0.5056  |
| CEU | TBC1D3 | 65164484 | 6.7054  | 6.4814  | 0.1004  |
| CEU | TBC1D3 | 65169484 | 3.3626  | 4.9463  | -0.9032 |
| CEU | TBC1D3 | 65174484 | 3.1614  | 4.7757  | -0.9494 |
| CEU | TBC1D3 | 65179484 | 5.3119  | 6.9931  | -0.7034 |
| CEU | TBC1D3 | 65184484 | 7.1429  | 7.6753  | -0.2046 |
| CEU | TBC1D3 | 65189484 | 5.8458  | 6.3108  | -0.2135 |
| CEU | TBC1D3 | 65194484 | 2.7691  | 4.9463  | -1.2417 |

## 2\_TajimasD\_data

|     |        |          |         |         |         |
|-----|--------|----------|---------|---------|---------|
| CEU | TBC1D3 | 65199484 | 3.3179  | 5.2874  | -1.059  |
| CEU | TBC1D3 | 65204484 | 3.7363  | 5.1169  | -0.7642 |
| CEU | TBC1D3 | 65209484 | 4.6327  | 5.7991  | -0.5777 |
| CEU | TBC1D3 | 65214484 | 4.5805  | 7.1636  | -1.0574 |
| CEU | TBC1D3 | 65219484 | 3.0472  | 5.6286  | -1.3131 |
| CEU | TBC1D3 | 65224484 | 2.9248  | 4.4346  | -0.9473 |
| CEU | TBC1D3 | 65229484 | 3.5758  | 4.9463  | -0.7816 |
| CEU | TBC1D3 | 65234484 | 2.9868  | 5.2874  | -1.237  |
| CEU | TBC1D3 | 65239484 | 1.0897  | 4.2641  | -2.0606 |
| CEU | TBC1D3 | 65244484 | 0.731   | 4.9463  | -2.404  |
| CEU | TBC1D3 | 65249484 | 1.3261  | 6.3108  | -2.2886 |
| CEU | TBC1D3 | 65254484 | 1.3676  | 5.458   | -2.1384 |
| CEU | TBC1D3 | 65259484 | 1.2672  | 5.1169  | -2.1309 |
| CEU | TBC1D3 | 65264484 | 1.086   | 4.7757  | -2.1701 |
| CEU | TBC1D3 | 65269484 | 2.3898  | 4.4346  | -1.283  |
| CEU | TBC1D3 | 65274484 | 5.7813  | 5.6286  | 0.0777  |
| CEU | TBC1D3 | 65279484 | 6.6092  | 5.1169  | 0.826   |
| CEU | TBC1D3 | 65284484 | 6.9713  | 5.1169  | 1.0264  |
| CEU | TBC1D3 | 65289484 | 8.5549  | 6.6519  | 0.8332  |
| CEU | TBC1D3 | 65294484 | 6.1859  | 5.9697  | 0.1043  |
| CEU | TBC1D3 | 65299484 | 4.0678  | 4.4346  | -0.2301 |
| CEU | TBC1D3 | 65304484 | 6.5912  | 6.1402  | 0.2122  |
| CEU | TBC1D3 | 65309484 | 8.3599  | 8.187   | 0.0626  |
| CEU | TBC1D3 | 65314484 | 7.3117  | 7.3342  | -0.009  |
| CEU | TBC1D3 | 65319484 | 9.4092  | 7.3342  | 0.8314  |
| CEU | TBC1D3 | 65324484 | 11.1585 | 7.8459  | 1.2479  |
| CEU | TBC1D3 | 65329484 | 15.0093 | 9.2104  | 1.8843  |
| CEU | TBC1D3 | 65334484 | 26.0851 | 13.9861 | 2.656   |
| CEU | TBC1D3 | 65339484 | 19.0153 | 13.3039 | 1.3147  |
| CEU | TBC1D3 | 65344484 | 6.5634  | 7.3342  | -0.3088 |
| CEU | TBC1D3 | 65349484 | 8.3548  | 6.1402  | 1.0421  |
| CEU | TBC1D3 | 65354484 | 8.1247  | 6.3108  | 0.8328  |
| CEU | TBC1D3 | 65359484 | 7.4317  | 6.1402  | 0.6077  |
| CEU | TBC1D3 | 65364484 | 7.7506  | 7.1636  | 0.2403  |
| CEU | TBC1D3 | 65369484 | 6.2807  | 6.9931  | -0.2981 |
| CEU | TBC1D3 | 65374484 | 7.9036  | 8.0164  | -0.0417 |
| CHB | TBC1D3 | 64264484 | 9.1296  | 6.946   | 0.9166  |
| CHB | TBC1D3 | 64269484 | 5.7559  | 6.2684  | -0.236  |
| CHB | TBC1D3 | 64274484 | 5.1609  | 7.1154  | -0.8027 |
| CHB | TBC1D3 | 64279484 | 6.8422  | 7.6237  | -0.3014 |
| CHB | TBC1D3 | 64284484 | 5.1338  | 6.946   | -0.7607 |
| CHB | TBC1D3 | 64289484 | 5.2105  | 7.1154  | -0.7823 |
| CHB | TBC1D3 | 64294484 | 6.7556  | 7.4543  | -0.275  |
| CHB | TBC1D3 | 64299484 | 5.1306  | 7.4543  | -0.9147 |
| CHB | TBC1D3 | 64304484 | 4.4377  | 6.4378  | -0.8993 |
| CHB | TBC1D3 | 64309484 | 6.9081  | 5.9295  | 0.4738  |
| CHB | TBC1D3 | 64314484 | 6.0148  | 6.4378  | -0.1902 |
| CHB | TBC1D3 | 64319484 | 4.454   | 5.4213  | -0.5072 |
| CHB | TBC1D3 | 64324484 | 3.368   | 5.4213  | -1.0767 |

## 2\_TajimasD\_data

|     |        |          |         |         |         |
|-----|--------|----------|---------|---------|---------|
| CHB | TBC1D3 | 64329484 | 2.7765  | 5.5907  | -1.4359 |
| CHB | TBC1D3 | 64334484 | 3.4613  | 5.0825  | -0.9001 |
| CHB | TBC1D3 | 64339484 | 6.9073  | 7.1154  | -0.0855 |
| CHB | TBC1D3 | 64344484 | 8.5493  | 9.1484  | -0.1953 |
| CHB | TBC1D3 | 64349484 | 5.0146  | 6.2684  | -0.5775 |
| CHB | TBC1D3 | 64354484 | 4.9057  | 5.2519  | -0.1867 |
| CHB | TBC1D3 | 64359484 | 4.6336  | 6.6072  | -0.8668 |
| CHB | TBC1D3 | 64364484 | 2.3198  | 6.4378  | -1.8516 |
| CHB | TBC1D3 | 64369484 | 1.9166  | 5.9295  | -1.9427 |
| CHB | TBC1D3 | 64374484 | 2.5134  | 7.6237  | -1.9707 |
| CHB | TBC1D3 | 64379484 | 2.6627  | 9.6567  | -2.1687 |
| CHB | TBC1D3 | 64384484 | 3.0096  | 8.1319  | -1.8618 |
| CHB | TBC1D3 | 64389484 | 3.9323  | 7.1154  | -1.3072 |
| CHB | TBC1D3 | 64394484 | 4.7588  | 6.946   | -0.9181 |
| CHB | TBC1D3 | 64399484 | 5.4365  | 7.9625  | -0.9361 |
| CHB | TBC1D3 | 64404484 | 5.5517  | 7.9625  | -0.8934 |
| CHB | TBC1D3 | 64409484 | 4.2121  | 6.2684  | -0.9471 |
| CHB | TBC1D3 | 64414484 | 4.1428  | 6.4378  | -1.0319 |
| CHB | TBC1D3 | 64419484 | 5.8686  | 8.1319  | -0.8227 |
| CHB | TBC1D3 | 64424484 | 8.8009  | 10.8426 | -0.5682 |
| CHB | TBC1D3 | 64429484 | 10.2465 | 9.1484  | 0.358   |
| CHB | TBC1D3 | 64434484 | 8.3594  | 6.946   | 0.5933  |
| CHB | TBC1D3 | 64439484 | 5.6402  | 7.1154  | -0.6058 |
| CHB | TBC1D3 | 64444484 | 6.2117  | 7.4543  | -0.4891 |
| CHB | TBC1D3 | 64449484 | 7.3883  | 8.8096  | -0.4799 |
| CHB | TBC1D3 | 64454484 | 4.6073  | 7.6237  | -1.1632 |
| CHB | TBC1D3 | 64459484 | 4.8681  | 9.4872  | -1.456  |
| CHB | TBC1D3 | 64464484 | 5.7896  | 8.979   | -1.058  |
| CHB | TBC1D3 | 64469484 | 5.478   | 6.4378  | -0.4316 |
| CHB | TBC1D3 | 64474484 | 6.1437  | 7.7931  | -0.6234 |
| CHB | TBC1D3 | 64479484 | 5.3745  | 7.1154  | -0.7149 |
| CHB | TBC1D3 | 64484484 | 6.0097  | 8.4708  | -0.8616 |
| CHB | TBC1D3 | 64489484 | 4.549   | 8.8096  | -1.4385 |
| CHB | TBC1D3 | 64494484 | 2.5288  | 7.7931  | -1.9896 |
| CHB | TBC1D3 | 64499484 | 3.1361  | 7.4543  | -1.6998 |
| CHB | TBC1D3 | 64504484 | 3.9355  | 6.946   | -1.2637 |
| CHB | TBC1D3 | 64509484 | 3.6616  | 6.6072  | -1.2937 |
| CHB | TBC1D3 | 64514484 | 3.2316  | 6.0989  | -1.3535 |
| CHB | TBC1D3 | 64519484 | 3.4412  | 6.946   | -1.4712 |
| CHB | TBC1D3 | 64524484 | 2.7892  | 8.4708  | -1.989  |
| CHB | TBC1D3 | 64529484 | 3.9496  | 8.6402  | -1.6123 |
| CHB | TBC1D3 | 64534484 | 5.8544  | 7.4543  | -0.6298 |
| CHB | TBC1D3 | 64539484 | 8.9225  | 8.8096  | 0.0381  |
| CHB | TBC1D3 | 64544484 | 11.2534 | 11.1814 | 0.0195  |
| CHB | TBC1D3 | 64549484 | 9.6145  | 10.1649 | -0.1627 |
| CHB | TBC1D3 | 64554484 | 6.3379  | 7.2848  | -0.3806 |
| CHB | TBC1D3 | 64559484 | 4.2517  | 6.2684  | -0.9288 |
| CHB | TBC1D3 | 64564484 | 6.7352  | 7.1154  | -0.1561 |
| CHB | TBC1D3 | 64569484 | 7.2153  | 7.7931  | -0.2184 |

## 2\_TajimasD\_data

|     |        |          |         |         |         |
|-----|--------|----------|---------|---------|---------|
| CHB | TBC1D3 | 64574484 | 4.6387  | 7.6237  | -1.1511 |
| CHB | TBC1D3 | 64579484 | 3.8719  | 7.1154  | -1.332  |
| CHB | TBC1D3 | 64584484 | 4.0946  | 6.946   | -1.1969 |
| CHB | TBC1D3 | 64589484 | 4.0242  | 5.2519  | -0.6621 |
| CHB | TBC1D3 | 64594484 | 4.8761  | 4.2354  | 0.4171  |
| CHB | TBC1D3 | 64599484 | 8.9848  | 6.4378  | 1.1452  |
| CHB | TBC1D3 | 64604484 | 7.2069  | 7.6237  | -0.1607 |
| CHB | TBC1D3 | 64609484 | 4.5821  | 7.6237  | -1.1729 |
| CHB | TBC1D3 | 64614484 | 6.2077  | 6.7766  | -0.2442 |
| CHB | TBC1D3 | 64619484 | 5.6644  | 6.2684  | -0.2782 |
| CHB | TBC1D3 | 64624484 | 6.2022  | 7.2848  | -0.4352 |
| CHB | TBC1D3 | 64629484 | 4.9547  | 6.7766  | -0.7821 |
| CHB | TBC1D3 | 64634484 | 4.1559  | 6.4378  | -1.026  |
| CHB | TBC1D3 | 64639484 | 4.6252  | 6.946   | -0.9742 |
| CHB | TBC1D3 | 64644484 | 4.4436  | 6.4378  | -0.8967 |
| CHB | TBC1D3 | 64649484 | 5.3996  | 6.6072  | -0.5304 |
| CHB | TBC1D3 | 64654484 | 6.0244  | 6.7766  | -0.3229 |
| CHB | TBC1D3 | 64659484 | 14.1492 | 9.1484  | 1.6305  |
| CHB | TBC1D3 | 64664484 | 29.9676 | 15.925  | 2.7164  |
| CHB | TBC1D3 | 64669484 | 27.5591 | 17.6192 | 1.7454  |
| CHB | TBC1D3 | 64674484 | 13.6471 | 12.7061 | 0.2256  |
| CHB | TBC1D3 | 64679484 | 8.8553  | 8.4708  | 0.1346  |
| CHB | TBC1D3 | 64684484 | 5.7085  | 7.2848  | -0.6336 |
| CHB | TBC1D3 | 64689484 | 6.1172  | 7.7931  | -0.6334 |
| CHB | TBC1D3 | 64694484 | 9.9511  | 7.7931  | 0.8156  |
| CHB | TBC1D3 | 64699484 | 13.949  | 10.5037 | 0.9878  |
| CHB | TBC1D3 | 64704484 | 12.024  | 9.4872  | 0.7997  |
| CHB | TBC1D3 | 64709484 | 9.222   | 8.6402  | 0.2     |
| CHB | TBC1D3 | 64714484 | 12.7639 | 10.6731 | 0.5905  |
| CHB | TBC1D3 | 64719484 | 14.7198 | 10.1649 | 1.3465  |
| CHB | TBC1D3 | 64724484 | 13.1704 | 9.6567  | 1.0895  |
| CHB | TBC1D3 | 64729484 | 11.913  | 9.6567  | 0.6996  |
| CHB | TBC1D3 | 64734484 | 12.8193 | 10.1649 | 0.7847  |
| CHB | TBC1D3 | 64739484 | 15.3602 | 11.1814 | 1.1299  |
| CHB | TBC1D3 | 64744484 | 16.0956 | 12.3673 | 0.9169  |
| CHB | TBC1D3 | 64749484 | 17.8502 | 12.8755 | 1.1777  |
| CHB | TBC1D3 | 64754484 | 15.778  | 11.1814 | 1.2429  |
| CHB | TBC1D3 | 64759484 | 16.1093 | 11.5202 | 1.2065  |
| CHB | TBC1D3 | 64764484 | 11.6634 | 11.5202 | 0.0376  |
| CHB | TBC1D3 | 64769484 | 4.3657  | 7.4543  | -1.2158 |
| CHB | TBC1D3 | 64774484 | 5.475   | 6.4378  | -0.4329 |
| CHB | TBC1D3 | 64779484 | 5.703   | 7.4543  | -0.6894 |
| CHB | TBC1D3 | 64784484 | 9.1279  | 9.3178  | -0.0609 |
| CHB | TBC1D3 | 64789484 | 7.9606  | 9.3178  | -0.435  |
| CHB | TBC1D3 | 64794484 | 6.0019  | 8.979   | -0.9876 |
| CHB | TBC1D3 | 64799484 | 7.668   | 9.9955  | -0.6989 |
| CHB | TBC1D3 | 64804484 | 6.0417  | 7.9625  | -0.7118 |
| CHB | TBC1D3 | 64809484 | 3.4521  | 5.0825  | -0.9052 |
| CHB | TBC1D3 | 64814484 | 3.6503  | 6.0989  | -1.1558 |

## 2\_TajimasD\_data

|     |        |          |         |         |         |
|-----|--------|----------|---------|---------|---------|
| CHB | TBC1D3 | 64819484 | 6.8856  | 8.4708  | -0.5549 |
| CHB | TBC1D3 | 64824484 | 4.6849  | 6.6072  | -0.8443 |
| CHB | TBC1D3 | 64829484 | 3.6615  | 6.4378  | -1.2483 |
| CHB | TBC1D3 | 64834484 | 5.818   | 7.6237  | -0.6963 |
| CHB | TBC1D3 | 64839484 | 4.462   | 6.0989  | -0.7727 |
| CHB | TBC1D3 | 64844484 | 3.2532  | 6.0989  | -1.3433 |
| CHB | TBC1D3 | 64849484 | 3.6252  | 7.6237  | -1.5419 |
| CHB | TBC1D3 | 64854484 | 4.7798  | 7.2848  | -1.0069 |
| CHB | TBC1D3 | 64859484 | 4.6974  | 6.0989  | -0.6616 |
| CHB | TBC1D3 | 64864484 | 5.0512  | 6.2684  | -0.5606 |
| CHB | TBC1D3 | 64869484 | 4.9008  | 5.7601  | -0.4269 |
| CHB | TBC1D3 | 64874484 | 4.7302  | 5.7601  | -0.5117 |
| CHB | TBC1D3 | 64879484 | 5.5304  | 6.6072  | -0.4729 |
| CHB | TBC1D3 | 64884484 | 6.529   | 7.2848  | -0.3038 |
| CHB | TBC1D3 | 64889484 | 7.1512  | 8.1319  | -0.3565 |
| CHB | TBC1D3 | 64894484 | 9.6959  | 9.4872  | 0.0658  |
| CHB | TBC1D3 | 64899484 | 10.9459 | 9.8261  | 0.3417  |
| CHB | TBC1D3 | 64904484 | 7.5875  | 8.6402  | -0.3619 |
| CHB | TBC1D3 | 64909484 | 8.4674  | 9.4872  | -0.3215 |
| CHB | TBC1D3 | 64914484 | 11.7914 | 11.1814 | 0.1649  |
| CHB | TBC1D3 | 64919484 | 11.3992 | 11.012  | 0.1062  |
| CHB | TBC1D3 | 64924484 | 10.1859 | 10.3343 | -0.0432 |
| CHB | TBC1D3 | 64929484 | 8.4263  | 10.1649 | -0.514  |
| CHB | TBC1D3 | 64934484 | 12.666  | 12.0285 | 0.1609  |
| CHB | TBC1D3 | 64939484 | 15.1828 | 13.3838 | 0.4106  |
| CHB | TBC1D3 | 64944484 | 12.23   | 12.3673 | -0.0338 |
| CHB | TBC1D3 | 64949484 | 9.234   | 8.8096  | 0.1433  |
| CHB | TBC1D3 | 64954484 | 9.9269  | 7.7931  | 0.8065  |
| CHB | TBC1D3 | 64959484 | 9.6065  | 8.6402  | 0.3322  |
| CHB | TBC1D3 | 64964484 | 3.5155  | 5.9295  | -1.1687 |
| CHB | TBC1D3 | 64969484 | 3.7906  | 6.7766  | -1.2818 |
| CHB | TBC1D3 | 64974484 | 6.6905  | 8.6402  | -0.6702 |
| CHB | TBC1D3 | 64979484 | 7.4913  | 8.4708  | -0.3429 |
| CHB | TBC1D3 | 64984484 | 6.9501  | 8.8096  | -0.6278 |
| CHB | TBC1D3 | 64989484 | 4.7672  | 8.1319  | -1.223  |
| CHB | TBC1D3 | 64994484 | 2.7747  | 7.6237  | -1.8699 |
| CHB | TBC1D3 | 64999484 | 2.5457  | 6.946   | -1.8471 |
| CHB | TBC1D3 | 65004484 | 6.462   | 10.3343 | -1.1272 |
| CHB | TBC1D3 | 65009484 | 7.2389  | 10.5037 | -0.936  |
| CHB | TBC1D3 | 65014484 | 7.5589  | 9.9955  | -0.7317 |
| CHB | TBC1D3 | 65019484 | 11.6002 | 10.6731 | 0.2618  |
| CHB | TBC1D3 | 65024484 | 12.3687 | 10.6731 | 0.4789  |
| CHB | TBC1D3 | 65029484 | 11.5812 | 15.925  | -0.8402 |
| CHB | TBC1D3 | 65034484 | 13.1578 | 19.1439 | -0.9706 |
| CHB | TBC1D3 | 65039484 | 12.2064 | 17.1109 | -0.8857 |
| CHB | TBC1D3 | 65044484 | 8.9071  | 12.0285 | -0.788  |
| CHB | TBC1D3 | 65049484 | 9.6954  | 11.5202 | -0.4798 |
| CHB | TBC1D3 | 65054484 | 12.1241 | 13.892  | -0.3895 |
| CHB | TBC1D3 | 65059484 | 11.8256 | 12.3673 | -0.1332 |

## 2\_TajimasD\_data

|     |        |          |         |         |         |
|-----|--------|----------|---------|---------|---------|
| CHB | TBC1D3 | 65064484 | 10.3588 | 11.8591 | -0.3838 |
| CHB | TBC1D3 | 65069484 | 8.1883  | 9.6567  | -0.4553 |
| CHB | TBC1D3 | 65074484 | 6.8167  | 7.4543  | -0.251  |
| CHB | TBC1D3 | 65079484 | 11.0573 | 12.7061 | -0.3953 |
| CHB | TBC1D3 | 65084484 | 9.6924  | 11.1814 | -0.4026 |
| CHB | TBC1D3 | 65089484 | 4.886   | 5.7601  | -0.4343 |
| CHB | TBC1D3 | 65094484 | 7.439   | 8.8096  | -0.4628 |
| CHB | TBC1D3 | 65099484 | 6.9482  | 9.4872  | -0.8003 |
| CHB | TBC1D3 | 65104484 | 3.0581  | 5.9295  | -1.3901 |
| CHB | TBC1D3 | 65109484 | 2.8498  | 4.913   | -1.1801 |
| CHB | TBC1D3 | 65114484 | 2.8574  | 5.2519  | -1.2914 |
| CHB | TBC1D3 | 65119484 | 4.6057  | 6.4378  | -0.8238 |
| CHB | TBC1D3 | 65124484 | 5.1133  | 6.6072  | -0.6561 |
| CHB | TBC1D3 | 65129484 | 3.2608  | 5.0825  | -1.0114 |
| CHB | TBC1D3 | 65134484 | 3.7251  | 5.5907  | -0.9519 |
| CHB | TBC1D3 | 65139484 | 3.4064  | 6.0989  | -1.271  |
| CHB | TBC1D3 | 65144484 | 2.4963  | 5.7601  | -1.6215 |
| CHB | TBC1D3 | 65149484 | 3.2189  | 5.7601  | -1.2625 |
| CHB | TBC1D3 | 65154484 | 3.901   | 6.0989  | -1.0375 |
| CHB | TBC1D3 | 65159484 | 4.4371  | 6.6072  | -0.9531 |
| CHB | TBC1D3 | 65164484 | 3.6006  | 5.7601  | -1.0729 |
| CHB | TBC1D3 | 65169484 | 1.688   | 4.5742  | -1.7575 |
| CHB | TBC1D3 | 65174484 | 1.7042  | 5.9295  | -2.0455 |
| CHB | TBC1D3 | 65179484 | 3.2349  | 7.1154  | -1.5936 |
| CHB | TBC1D3 | 65184484 | 3.8715  | 7.2848  | -1.372  |
| CHB | TBC1D3 | 65189484 | 2.669   | 6.2684  | -1.6578 |
| CHB | TBC1D3 | 65194484 | 1.2736  | 4.5742  | -2.0098 |
| CHB | TBC1D3 | 65199484 | 1.558   | 5.0825  | -1.9567 |
| CHB | TBC1D3 | 65204484 | 1.7295  | 4.913   | -1.821  |
| CHB | TBC1D3 | 65209484 | 1.8675  | 4.5742  | -1.6482 |
| CHB | TBC1D3 | 65214484 | 2.0874  | 5.9295  | -1.86   |
| CHB | TBC1D3 | 65219484 | 1.7436  | 6.0989  | -2.0559 |
| CHB | TBC1D3 | 65224484 | 1.4725  | 5.4213  | -2.0706 |
| CHB | TBC1D3 | 65229484 | 1.9492  | 5.5907  | -1.858  |
| CHB | TBC1D3 | 65234484 | 1.8106  | 5.4213  | -1.8933 |
| CHB | TBC1D3 | 65239484 | 0.9128  | 4.5742  | -2.2295 |
| CHB | TBC1D3 | 65244484 | 0.7051  | 4.7436  | -2.3822 |
| CHB | TBC1D3 | 65249484 | 1.0152  | 6.2684  | -2.4194 |
| CHB | TBC1D3 | 65254484 | 1.0025  | 5.5907  | -2.341  |
| CHB | TBC1D3 | 65259484 | 1.0445  | 4.5742  | -2.1493 |
| CHB | TBC1D3 | 65264484 | 1.123   | 4.066   | -1.9846 |
| CHB | TBC1D3 | 65269484 | 1.6276  | 4.066   | -1.6443 |
| CHB | TBC1D3 | 65274484 | 4.5593  | 4.913   | -0.2023 |
| CHB | TBC1D3 | 65279484 | 6.099   | 5.7601  | 0.1684  |
| CHB | TBC1D3 | 65284484 | 6.1749  | 6.0989  | 0.0359  |
| CHB | TBC1D3 | 65289484 | 6.8772  | 5.9295  | 0.4588  |
| CHB | TBC1D3 | 65294484 | 4.9412  | 5.9295  | -0.4785 |
| CHB | TBC1D3 | 65299484 | 3.5762  | 6.0989  | -1.1908 |
| CHB | TBC1D3 | 65304484 | 5.2831  | 6.6072  | -0.5816 |

## 2\_TajimasD\_data

|     |        |          |         |         |         |
|-----|--------|----------|---------|---------|---------|
| CHB | TBC1D3 | 65309484 | 6.8022  | 7.1154  | -0.1286 |
| CHB | TBC1D3 | 65314484 | 6.0669  | 6.7766  | -0.3046 |
| CHB | TBC1D3 | 65319484 | 8.2567  | 7.7931  | 0.1752  |
| CHB | TBC1D3 | 65324484 | 10.8593 | 8.3013  | 0.9123  |
| CHB | TBC1D3 | 65329484 | 14.671  | 10.6731 | 1.1292  |
| CHB | TBC1D3 | 65334484 | 24.3663 | 14.4003 | 2.1218  |
| CHB | TBC1D3 | 65339484 | 16.3946 | 12.0285 | 1.1022  |
| CHB | TBC1D3 | 65344484 | 5.3004  | 8.3013  | -1.0703 |
| CHB | TBC1D3 | 65349484 | 8.1333  | 7.6237  | 0.1965  |
| CHB | TBC1D3 | 65354484 | 7.2408  | 7.7931  | -0.2087 |
| CHB | TBC1D3 | 65359484 | 6.5694  | 7.6237  | -0.4066 |
| CHB | TBC1D3 | 65364484 | 7.4738  | 7.6237  | -0.0578 |
| CHB | TBC1D3 | 65369484 | 5.6164  | 7.6237  | -0.7741 |
| CHB | TBC1D3 | 65374484 | 6.5287  | 9.1484  | -0.8541 |
| YRI | TBC1D3 | 64264484 | 9.1723  | 10.0837 | -0.2705 |
| YRI | TBC1D3 | 64269484 | 5.8237  | 11.7644 | -1.5262 |
| YRI | TBC1D3 | 64274484 | 5.26    | 14.2853 | -1.9297 |
| YRI | TBC1D3 | 64279484 | 6.5675  | 14.4534 | -1.6674 |
| YRI | TBC1D3 | 64284484 | 5.7579  | 12.2685 | -1.6078 |
| YRI | TBC1D3 | 64289484 | 5.7377  | 9.7476  | -1.2284 |
| YRI | TBC1D3 | 64294484 | 6.8062  | 10.756  | -1.1038 |
| YRI | TBC1D3 | 64299484 | 6.5919  | 11.7644 | -1.3288 |
| YRI | TBC1D3 | 64304484 | 7.5561  | 12.7727 | -1.2402 |
| YRI | TBC1D3 | 64309484 | 9.7691  | 15.1256 | -1.0846 |
| YRI | TBC1D3 | 64314484 | 8.6186  | 12.7727 | -0.9876 |
| YRI | TBC1D3 | 64319484 | 7.116   | 10.4199 | -0.9511 |
| YRI | TBC1D3 | 64324484 | 9.8325  | 13.1089 | -0.76   |
| YRI | TBC1D3 | 64329484 | 11.9511 | 12.9408 | -0.2324 |
| YRI | TBC1D3 | 64334484 | 8.6954  | 10.0837 | -0.4121 |
| YRI | TBC1D3 | 64339484 | 9.7359  | 13.2769 | -0.8115 |
| YRI | TBC1D3 | 64344484 | 12.4417 | 13.1089 | -0.1548 |
| YRI | TBC1D3 | 64349484 | 8.9879  | 11.5963 | -0.6792 |
| YRI | TBC1D3 | 64354484 | 6.7467  | 12.4366 | -1.3872 |
| YRI | TBC1D3 | 64359484 | 6.2673  | 12.1005 | -1.4594 |
| YRI | TBC1D3 | 64364484 | 4.9425  | 13.1089 | -1.8943 |
| YRI | TBC1D3 | 64369484 | 4.1495  | 11.2602 | -1.9035 |
| YRI | TBC1D3 | 64374484 | 6.0635  | 12.2685 | -1.5323 |
| YRI | TBC1D3 | 64379484 | 6.3898  | 12.9408 | -1.5383 |
| YRI | TBC1D3 | 64384484 | 5.2533  | 11.9324 | -1.6931 |
| YRI | TBC1D3 | 64389484 | 5.3294  | 11.7644 | -1.6532 |
| YRI | TBC1D3 | 64394484 | 6.2216  | 10.756  | -1.2671 |
| YRI | TBC1D3 | 64399484 | 9.4393  | 10.756  | -0.3679 |
| YRI | TBC1D3 | 64404484 | 11.3221 | 11.5963 | -0.0714 |
| YRI | TBC1D3 | 64409484 | 10.1878 | 12.1005 | -0.4785 |
| YRI | TBC1D3 | 64414484 | 11.0373 | 11.5963 | -0.1456 |
| YRI | TBC1D3 | 64419484 | 13.0152 | 12.7727 | 0.0577  |
| YRI | TBC1D3 | 64424484 | 15.778  | 13.613  | 0.4846  |
| YRI | TBC1D3 | 64429484 | 14.3236 | 11.5963 | 0.7102  |
| YRI | TBC1D3 | 64434484 | 9.5334  | 10.4199 | -0.2552 |



## 2\_TajimasD\_data

|     |        |          |         |         |         |
|-----|--------|----------|---------|---------|---------|
| YRI | TBC1D3 | 64439484 | 6.7676  | 10.0837 | -0.9843 |
| YRI | TBC1D3 | 64444484 | 8.1664  | 11.2602 | -0.8282 |
| YRI | TBC1D3 | 64449484 | 11.4295 | 13.445  | -0.4565 |
| YRI | TBC1D3 | 64454484 | 9.0957  | 12.1005 | -0.7517 |
| YRI | TBC1D3 | 64459484 | 8.7262  | 13.7811 | -1.1183 |
| YRI | TBC1D3 | 64464484 | 8.6847  | 14.6214 | -1.2416 |
| YRI | TBC1D3 | 64469484 | 7.1474  | 12.4366 | -1.2895 |
| YRI | TBC1D3 | 64474484 | 7.2076  | 11.2602 | -1.0849 |
| YRI | TBC1D3 | 64479484 | 6.3553  | 10.5879 | -1.2003 |
| YRI | TBC1D3 | 64484484 | 7.9309  | 13.445  | -1.2488 |
| YRI | TBC1D3 | 64489484 | 8.4428  | 13.613  | -1.1572 |
| YRI | TBC1D3 | 64494484 | 7.28    | 12.1005 | -1.206  |
| YRI | TBC1D3 | 64499484 | 6.99    | 11.9324 | -1.2529 |
| YRI | TBC1D3 | 64504484 | 7.4492  | 11.7644 | -1.1086 |
| YRI | TBC1D3 | 64509484 | 7.9467  | 11.9324 | -1.0104 |
| YRI | TBC1D3 | 64514484 | 8.7426  | 12.7727 | -0.9581 |
| YRI | TBC1D3 | 64519484 | 8.518   | 13.1089 | -1.0649 |
| YRI | TBC1D3 | 64524484 | 7.7202  | 12.9408 | -1.2259 |
| YRI | TBC1D3 | 64529484 | 10.7728 | 14.6214 | -0.8049 |
| YRI | TBC1D3 | 64534484 | 11.4663 | 14.6214 | -0.6598 |
| YRI | TBC1D3 | 64539484 | 12.0939 | 13.613  | -0.34   |
| YRI | TBC1D3 | 64544484 | 14.6319 | 14.9575 | -0.0666 |
| YRI | TBC1D3 | 64549484 | 11.7824 | 13.7811 | -0.4422 |
| YRI | TBC1D3 | 64554484 | 6.4061  | 10.4199 | -1.1554 |
| YRI | TBC1D3 | 64559484 | 4.3959  | 10.4199 | -1.7341 |
| YRI | TBC1D3 | 64564484 | 8.0885  | 12.7727 | -1.1136 |
| YRI | TBC1D3 | 64569484 | 9.0819  | 12.7727 | -0.8774 |
| YRI | TBC1D3 | 64574484 | 5.9381  | 12.2685 | -1.5633 |
| YRI | TBC1D3 | 64579484 | 5.331   | 13.445  | -1.8376 |
| YRI | TBC1D3 | 64584484 | 8.3048  | 19.6633 | -1.7888 |
| YRI | TBC1D3 | 64589484 | 7.0243  | 16.302  | -1.749  |
| YRI | TBC1D3 | 64594484 | 6.2192  | 11.0921 | -1.323  |
| YRI | TBC1D3 | 64599484 | 12.3635 | 16.134  | -0.7179 |
| YRI | TBC1D3 | 64604484 | 12.1582 | 16.6382 | -0.8283 |
| YRI | TBC1D3 | 64609484 | 8.2323  | 14.7895 | -1.3565 |
| YRI | TBC1D3 | 64614484 | 7.5147  | 11.5963 | -1.0629 |
| YRI | TBC1D3 | 64619484 | 6.9204  | 9.9157  | -0.9031 |
| YRI | TBC1D3 | 64624484 | 7.2458  | 10.2518 | -0.8786 |
| YRI | TBC1D3 | 64629484 | 7.4393  | 10.5879 | -0.8929 |
| YRI | TBC1D3 | 64634484 | 6.9306  | 10.0837 | -0.9359 |
| YRI | TBC1D3 | 64639484 | 7.8018  | 8.5712  | -0.2655 |
| YRI | TBC1D3 | 64644484 | 7.094   | 8.235   | -0.4085 |
| YRI | TBC1D3 | 64649484 | 5.9808  | 8.7392  | -0.935  |
| YRI | TBC1D3 | 64654484 | 6.7761  | 10.0837 | -0.9817 |
| YRI | TBC1D3 | 64659484 | 15.8891 | 12.7727 | 0.7409  |
| YRI | TBC1D3 | 64664484 | 32.6142 | 17.9827 | 2.5109  |
| YRI | TBC1D3 | 64669484 | 32.3719 | 20.3355 | 1.8352  |
| YRI | TBC1D3 | 64674484 | 19.9901 | 16.9743 | 0.547   |
| YRI | TBC1D3 | 64679484 | 12.911  | 11.7644 | 0.2946  |

## 2\_TajimasD\_data

|     |        |          |         |         |         |
|-----|--------|----------|---------|---------|---------|
| YRI | TBC1D3 | 64684484 | 8.7067  | 9.5795  | -0.2717 |
| YRI | TBC1D3 | 64689484 | 9.6705  | 11.2602 | -0.4256 |
| YRI | TBC1D3 | 64694484 | 12.4695 | 10.924  | 0.4257  |
| YRI | TBC1D3 | 64699484 | 17.6073 | 12.2685 | 1.3184  |
| YRI | TBC1D3 | 64704484 | 16.6548 | 13.1089 | 0.8225  |
| YRI | TBC1D3 | 64709484 | 12.1018 | 14.1172 | -0.4358 |
| YRI | TBC1D3 | 64714484 | 15.109  | 15.1256 | -0.0034 |
| YRI | TBC1D3 | 64719484 | 17.84   | 12.6047 | 1.2603  |
| YRI | TBC1D3 | 64724484 | 15.8174 | 12.2685 | 0.8764  |
| YRI | TBC1D3 | 64729484 | 12.5777 | 13.445  | -0.1964 |
| YRI | TBC1D3 | 64734484 | 12.2232 | 12.9408 | -0.1685 |
| YRI | TBC1D3 | 64739484 | 14.4033 | 13.7811 | 0.1376  |
| YRI | TBC1D3 | 64744484 | 17.0345 | 16.8062 | 0.0418  |
| YRI | TBC1D3 | 64749484 | 18.8955 | 17.4785 | 0.2499  |
| YRI | TBC1D3 | 64754484 | 15.5592 | 13.2769 | 0.5231  |
| YRI | TBC1D3 | 64759484 | 15.0687 | 13.445  | 0.3677  |
| YRI | TBC1D3 | 64764484 | 14.0946 | 13.9492 | 0.0318  |
| YRI | TBC1D3 | 64769484 | 9.1268  | 10.924  | -0.495  |
| YRI | TBC1D3 | 64774484 | 8.2578  | 10.4199 | -0.6224 |
| YRI | TBC1D3 | 64779484 | 7.5458  | 9.9157  | -0.7145 |
| YRI | TBC1D3 | 64784484 | 10.7303 | 12.1005 | -0.3428 |
| YRI | TBC1D3 | 64789484 | 9.7735  | 13.2769 | -0.8029 |
| YRI | TBC1D3 | 64794484 | 6.4973  | 12.4366 | -1.448  |
| YRI | TBC1D3 | 64799484 | 8.3006  | 12.7727 | -1.0632 |
| YRI | TBC1D3 | 64804484 | 7.5584  | 12.2685 | -1.1631 |
| YRI | TBC1D3 | 64809484 | 5.5933  | 10.0837 | -1.3328 |
| YRI | TBC1D3 | 64814484 | 5.517   | 9.2434  | -1.1993 |
| YRI | TBC1D3 | 64819484 | 7.3791  | 11.2602 | -1.039  |
| YRI | TBC1D3 | 64824484 | 5.26    | 10.0837 | -1.4317 |
| YRI | TBC1D3 | 64829484 | 4.2138  | 8.235   | -1.4398 |
| YRI | TBC1D3 | 64834484 | 7.315   | 10.4199 | -0.8938 |
| YRI | TBC1D3 | 64839484 | 7.0231  | 10.924  | -1.0744 |
| YRI | TBC1D3 | 64844484 | 5.6878  | 10.0837 | -1.3048 |
| YRI | TBC1D3 | 64849484 | 5.493   | 10.5879 | -1.4449 |
| YRI | TBC1D3 | 64854484 | 6.4951  | 11.2602 | -1.2756 |
| YRI | TBC1D3 | 64859484 | 6.7518  | 9.9157  | -0.9539 |
| YRI | TBC1D3 | 64864484 | 7.3739  | 9.7476  | -0.7272 |
| YRI | TBC1D3 | 64869484 | 7.7922  | 10.2518 | -0.7189 |
| YRI | TBC1D3 | 64874484 | 7.0999  | 9.9157  | -0.849  |
| YRI | TBC1D3 | 64879484 | 6.1239  | 9.0754  | -0.9662 |
| YRI | TBC1D3 | 64884484 | 6.3991  | 11.0921 | -1.2742 |
| YRI | TBC1D3 | 64889484 | 7.4636  | 11.9324 | -1.1328 |
| YRI | TBC1D3 | 64894484 | 9.5501  | 12.9408 | -0.7962 |
| YRI | TBC1D3 | 64899484 | 12.8238 | 15.1256 | -0.4661 |
| YRI | TBC1D3 | 64904484 | 11.4068 | 13.445  | -0.4616 |
| YRI | TBC1D3 | 64909484 | 11.7655 | 14.1172 | -0.5085 |
| YRI | TBC1D3 | 64914484 | 14.3709 | 15.1256 | -0.1528 |
| YRI | TBC1D3 | 64919484 | 13.3554 | 15.4617 | -0.4177 |
| YRI | TBC1D3 | 64924484 | 13.3393 | 15.9659 | -0.5051 |

## 2\_TajimasD\_data

|     |        |          |         |         |         |
|-----|--------|----------|---------|---------|---------|
| YRI | TBC1D3 | 64929484 | 12.3425 | 14.1172 | -0.3837 |
| YRI | TBC1D3 | 64934484 | 11.4832 | 15.4617 | -0.7889 |
| YRI | TBC1D3 | 64939484 | 13.6668 | 17.9827 | -0.7407 |
| YRI | TBC1D3 | 64944484 | 17.9438 | 19.3272 | -0.2215 |
| YRI | TBC1D3 | 64949484 | 14.4401 | 17.8146 | -0.5843 |
| YRI | TBC1D3 | 64954484 | 9.2471  | 14.2853 | -1.0772 |
| YRI | TBC1D3 | 64959484 | 10.5149 | 17.9827 | -1.2816 |
| YRI | TBC1D3 | 64964484 | 6.4442  | 15.7978 | -1.8171 |
| YRI | TBC1D3 | 64969484 | 4.8888  | 12.2685 | -1.8224 |
| YRI | TBC1D3 | 64974484 | 8.6762  | 13.9492 | -1.1532 |
| YRI | TBC1D3 | 64979484 | 11.0088 | 12.7727 | -0.4193 |
| YRI | TBC1D3 | 64984484 | 10.1265 | 11.4282 | -0.3437 |
| YRI | TBC1D3 | 64989484 | 8.3775  | 11.9324 | -0.9012 |
| YRI | TBC1D3 | 64994484 | 8.4673  | 14.4534 | -1.2657 |
| YRI | TBC1D3 | 64999484 | 7.521   | 14.9575 | -1.5219 |
| YRI | TBC1D3 | 65004484 | 11.0157 | 13.613  | -0.5813 |
| YRI | TBC1D3 | 65009484 | 11.185  | 10.756  | 0.1199  |
| YRI | TBC1D3 | 65014484 | 9.9493  | 10.4199 | -0.1355 |
| YRI | TBC1D3 | 65019484 | 11.2416 | 11.7644 | -0.1343 |
| YRI | TBC1D3 | 65024484 | 12.6005 | 13.613  | -0.2266 |
| YRI | TBC1D3 | 65029484 | 17.4547 | 18.823  | -0.2247 |
| YRI | TBC1D3 | 65034484 | 20.5868 | 22.3523 | -0.2457 |
| YRI | TBC1D3 | 65039484 | 16.7667 | 19.8313 | -0.4787 |
| YRI | TBC1D3 | 65044484 | 11.2393 | 15.4617 | -0.8373 |
| YRI | TBC1D3 | 65049484 | 12.0669 | 15.2937 | -0.6466 |
| YRI | TBC1D3 | 65054484 | 14.0069 | 16.4701 | -0.4598 |
| YRI | TBC1D3 | 65059484 | 13.6375 | 14.6214 | -0.2058 |
| YRI | TBC1D3 | 65064484 | 11.4992 | 15.2937 | -0.7603 |
| YRI | TBC1D3 | 65069484 | 8.2253  | 13.9492 | -1.2518 |
| YRI | TBC1D3 | 65074484 | 7.4142  | 10.5879 | -0.9    |
| YRI | TBC1D3 | 65079484 | 11.9523 | 15.1256 | -0.6426 |
| YRI | TBC1D3 | 65084484 | 11.9272 | 16.4701 | -0.8481 |
| YRI | TBC1D3 | 65089484 | 7.8228  | 14.2853 | -1.3817 |
| YRI | TBC1D3 | 65094484 | 9.168   | 15.1256 | -1.2064 |
| YRI | TBC1D3 | 65099484 | 8.1784  | 14.7895 | -1.3676 |
| YRI | TBC1D3 | 65104484 | 7.8137  | 13.9492 | -1.3418 |
| YRI | TBC1D3 | 65109484 | 8.6987  | 11.9324 | -0.8197 |
| YRI | TBC1D3 | 65114484 | 5.5077  | 8.7392  | -1.0954 |
| YRI | TBC1D3 | 65119484 | 7.0819  | 8.4031  | -0.4643 |
| YRI | TBC1D3 | 65124484 | 10.0344 | 9.7476  | 0.0879  |
| YRI | TBC1D3 | 65129484 | 8.2275  | 10.924  | -0.7427 |
| YRI | TBC1D3 | 65134484 | 6.5813  | 13.2769 | -1.5345 |
| YRI | TBC1D3 | 65139484 | 9.4303  | 14.9575 | -1.1312 |
| YRI | TBC1D3 | 65144484 | 10.7651 | 13.1089 | -0.5437 |
| YRI | TBC1D3 | 65149484 | 8.1272  | 10.924  | -0.7703 |
| YRI | TBC1D3 | 65154484 | 8.0965  | 12.9408 | -1.1375 |
| YRI | TBC1D3 | 65159484 | 9.6028  | 13.9492 | -0.9506 |
| YRI | TBC1D3 | 65164484 | 8.824   | 12.2685 | -0.8506 |
| YRI | TBC1D3 | 65169484 | 7.2637  | 10.924  | -1.0081 |

## 2\_TajimasD\_data

|     |        |          |         |         |         |
|-----|--------|----------|---------|---------|---------|
| YRI | TBC1D3 | 65174484 | 6.2922  | 9.7476  | -1.0585 |
| YRI | TBC1D3 | 65179484 | 6.8498  | 10.4199 | -1.0277 |
| YRI | TBC1D3 | 65184484 | 9.9418  | 13.2769 | -0.7644 |
| YRI | TBC1D3 | 65189484 | 7.9163  | 12.2685 | -1.0748 |
| YRI | TBC1D3 | 65194484 | 4.9977  | 10.2518 | -1.5356 |
| YRI | TBC1D3 | 65199484 | 5.655   | 10.0837 | -1.3145 |
| YRI | TBC1D3 | 65204484 | 5.0415  | 10.0837 | -1.4966 |
| YRI | TBC1D3 | 65209484 | 6.5129  | 10.4199 | -1.1247 |
| YRI | TBC1D3 | 65214484 | 8.9844  | 12.1005 | -0.7796 |
| YRI | TBC1D3 | 65219484 | 8.0714  | 12.2685 | -1.0365 |
| YRI | TBC1D3 | 65224484 | 6.778   | 12.4366 | -1.3796 |
| YRI | TBC1D3 | 65229484 | 6.1883  | 11.2602 | -1.3578 |
| YRI | TBC1D3 | 65234484 | 5.6888  | 9.7476  | -1.2434 |
| YRI | TBC1D3 | 65239484 | 6.7618  | 10.756  | -1.1162 |
| YRI | TBC1D3 | 65244484 | 9.9735  | 11.9324 | -0.4966 |
| YRI | TBC1D3 | 65249484 | 12.1726 | 14.9575 | -0.57   |
| YRI | TBC1D3 | 65254484 | 11.2213 | 14.4534 | -0.6834 |
| YRI | TBC1D3 | 65259484 | 9.5286  | 13.613  | -0.9142 |
| YRI | TBC1D3 | 65264484 | 8.1147  | 13.7811 | -1.2536 |
| YRI | TBC1D3 | 65269484 | 7.0549  | 11.2602 | -1.1258 |
| YRI | TBC1D3 | 65274484 | 6.8217  | 10.4199 | -1.0358 |
| YRI | TBC1D3 | 65279484 | 7.4142  | 13.1089 | -1.321  |
| YRI | TBC1D3 | 65284484 | 7.4918  | 13.9492 | -1.4122 |
| YRI | TBC1D3 | 65289484 | 6.4712  | 10.756  | -1.1974 |
| YRI | TBC1D3 | 65294484 | 5.3747  | 8.9073  | -1.1766 |
| YRI | TBC1D3 | 65299484 | 7.8875  | 10.756  | -0.8016 |
| YRI | TBC1D3 | 65304484 | 8.5518  | 11.7644 | -0.8253 |
| YRI | TBC1D3 | 65309484 | 7.7664  | 11.4282 | -0.9667 |
| YRI | TBC1D3 | 65314484 | 7.2989  | 10.756  | -0.9661 |
| YRI | TBC1D3 | 65319484 | 8.3346  | 10.756  | -0.6767 |
| YRI | TBC1D3 | 65324484 | 12.2487 | 11.9324 | 0.0802  |
| YRI | TBC1D3 | 65329484 | 16.3049 | 14.2853 | 0.4318  |
| YRI | TBC1D3 | 65334484 | 25.3253 | 18.1507 | 1.2203  |
| YRI | TBC1D3 | 65339484 | 23.1405 | 18.1507 | 0.8487  |
| YRI | TBC1D3 | 65344484 | 11.2739 | 13.7811 | -0.5547 |
| YRI | TBC1D3 | 65349484 | 8.9886  | 10.2518 | -0.3692 |
| YRI | TBC1D3 | 65354484 | 9.5614  | 9.4115  | 0.0474  |
| YRI | TBC1D3 | 65359484 | 8.5463  | 8.9073  | -0.1202 |
| YRI | TBC1D3 | 65364484 | 8.7616  | 9.4115  | -0.2057 |
| YRI | TBC1D3 | 65369484 | 6.6864  | 9.5795  | -0.9007 |
| YRI | TBC1D3 | 65374484 | 8.1548  | 10.924  | -0.7627 |
| CEU | TBC1D3 | 35670683 | 5.697   | 6.4814  | -0.3516 |
| CEU | TBC1D3 | 35675683 | 4.3991  | 5.9697  | -0.758  |
| CEU | TBC1D3 | 35680683 | 2.8095  | 5.7991  | -1.4807 |
| CEU | TBC1D3 | 35685683 | 4.3119  | 6.3108  | -0.9177 |
| CEU | TBC1D3 | 35690683 | 5.1841  | 6.8225  | -0.7011 |
| CEU | TBC1D3 | 35695683 | 7.2975  | 8.0164  | -0.2655 |
| CEU | TBC1D3 | 35700683 | 8.176   | 7.5047  | 0.2634  |
| CEU | TBC1D3 | 35705683 | 5.7685  | 7.3342  | -0.6273 |

## 2\_TajimasD\_data

|     |        |          |         |         |         |
|-----|--------|----------|---------|---------|---------|
| CEU | TBC1D3 | 35710683 | 3.7032  | 5.9697  | -1.0938 |
| CEU | TBC1D3 | 35715683 | 2.6246  | 5.6286  | -1.528  |
| CEU | TBC1D3 | 35720683 | 3.8295  | 7.1636  | -1.3648 |
| CEU | TBC1D3 | 35725683 | 4.0614  | 6.8225  | -1.1815 |
| CEU | TBC1D3 | 35730683 | 2.6642  | 6.3108  | -1.6742 |
| CEU | TBC1D3 | 35735683 | 4.724   | 8.8692  | -1.3949 |
| CEU | TBC1D3 | 35740683 | 7.4679  | 9.0398  | -0.5197 |
| CEU | TBC1D3 | 35745683 | 6.4047  | 5.6286  | 0.3948  |
| CEU | TBC1D3 | 35750683 | 7.5333  | 6.6519  | 0.3859  |
| CEU | TBC1D3 | 35755683 | 8.9412  | 8.5281  | 0.1441  |
| CEU | TBC1D3 | 35760683 | 9.4348  | 9.2104  | 0.0729  |
| CEU | TBC1D3 | 35765683 | 12.1556 | 9.7221  | 0.752   |
| CEU | TBC1D3 | 35770683 | 10.6063 | 9.0398  | 0.5179  |
| CEU | TBC1D3 | 35775683 | 9.5246  | 8.5281  | 0.3477  |
| CEU | TBC1D3 | 35780683 | 12.383  | 9.0398  | 1.1053  |
| CEU | TBC1D3 | 35785683 | 11.4073 | 8.3576  | 1.0841  |
| CEU | TBC1D3 | 35790683 | 12.1901 | 9.0398  | 1.0416  |
| CEU | TBC1D3 | 35795683 | 12.5296 | 10.5749 | 0.5585  |
| CEU | TBC1D3 | 35800683 | 9.1744  | 8.8692  | 0.1027  |
| CEU | TBC1D3 | 35805683 | 8.7943  | 7.5047  | 0.506   |
| CEU | TBC1D3 | 35810683 | 10.1134 | 8.3576  | 0.6241  |
| CEU | TBC1D3 | 35815683 | 13.0379 | 10.4043 | 0.764   |
| CEU | TBC1D3 | 35820683 | 11.5543 | 9.7221  | 0.5662  |
| CEU | TBC1D3 | 35825683 | 8.9771  | 8.3576  | 0.2202  |
| CEU | TBC1D3 | 35830683 | 9.5556  | 8.8692  | 0.231   |
| CEU | TBC1D3 | 35835683 | 7.3016  | 8.6987  | -0.4786 |
| CEU | TBC1D3 | 35840683 | 6.9913  | 8.8692  | -0.6319 |
| CEU | TBC1D3 | 35845683 | 10.356  | 8.6987  | 0.5678  |
| CEU | TBC1D3 | 35850683 | 8.5253  | 6.9931  | 0.6411  |
| CEU | TBC1D3 | 35855683 | 9.0082  | 8.3576  | 0.2313  |
| CEU | TBC1D3 | 35860683 | 9.3389  | 8.3576  | 0.3488  |
| CEU | TBC1D3 | 35865683 | 8.1983  | 6.9931  | 0.5043  |
| CEU | TBC1D3 | 35870683 | 11.9558 | 9.3809  | 0.8226  |
| CEU | TBC1D3 | 35875683 | 8.8591  | 8.6987  | 0.055   |
| CEU | TBC1D3 | 35880683 | 5.7396  | 6.9931  | -0.5245 |
| CEU | TBC1D3 | 35885683 | 6.5024  | 6.9931  | -0.2053 |
| CEU | TBC1D3 | 35890683 | 8.2859  | 7.5047  | 0.3065  |
| CEU | TBC1D3 | 35895683 | 9.3979  | 6.9931  | 1.0062  |
| CEU | TBC1D3 | 35900683 | 6.3162  | 6.4814  | -0.074  |
| CEU | TBC1D3 | 35905683 | 3.3533  | 5.458   | -1.1003 |
| CEU | TBC1D3 | 35910683 | 2.4393  | 3.9229  | -1.0348 |
| CEU | TBC1D3 | 35915683 | 3.3494  | 4.0935  | -0.5004 |
| CEU | TBC1D3 | 35920683 | 4.0738  | 4.9463  | -0.4976 |
| CEU | TBC1D3 | 35925683 | 5.6714  | 6.1402  | -0.2206 |
| CEU | TBC1D3 | 35930683 | 4.263   | 5.6286  | -0.6946 |
| CEU | TBC1D3 | 35935683 | 2.6125  | 4.6052  | -1.2099 |
| CEU | TBC1D3 | 35940683 | 2.6856  | 4.6052  | -1.1655 |
| CEU | TBC1D3 | 35945683 | 3.1927  | 5.458   | -1.1842 |
| CEU | TBC1D3 | 35950683 | 6.0225  | 6.8225  | -0.3423 |

## 2\_TajimasD\_data

|     |        |          |         |         |         |
|-----|--------|----------|---------|---------|---------|
| CEU | TBC1D3 | 35955683 | 5.9621  | 6.4814  | -0.2328 |
| CEU | TBC1D3 | 35960683 | 4.3857  | 5.9697  | -0.7645 |
| CEU | TBC1D3 | 35965683 | 4.7809  | 6.9931  | -0.9256 |
| CEU | TBC1D3 | 35970683 | 6.0482  | 6.3108  | -0.1206 |
| CEU | TBC1D3 | 35975683 | 4.1818  | 3.9229  | 0.1806  |
| CEU | TBC1D3 | 35980683 | 3.4407  | 5.2874  | -0.993  |
| CEU | TBC1D3 | 35985683 | 5.3548  | 7.6753  | -0.8919 |
| CEU | TBC1D3 | 35990683 | 4.6898  | 6.1402  | -0.6825 |
| CEU | TBC1D3 | 35995683 | 4.751   | 5.7991  | -0.5191 |
| CEU | TBC1D3 | 36000683 | 4.751   | 6.3108  | -0.7161 |
| CEU | TBC1D3 | 36005683 | 3.0767  | 5.1169  | -1.1293 |
| CEU | TBC1D3 | 36010683 | 2.7881  | 4.2641  | -0.9581 |
| CEU | TBC1D3 | 36015683 | 4.0608  | 4.9463  | -0.505  |
| CEU | TBC1D3 | 36020683 | 4.3519  | 5.1169  | -0.4234 |
| CEU | TBC1D3 | 36025683 | 7.2874  | 8.0164  | -0.2693 |
| CEU | TBC1D3 | 36030683 | 9.7761  | 9.7221  | 0.0167  |
| CEU | TBC1D3 | 36035683 | 5.6739  | 7.5047  | -0.7183 |
| CEU | TBC1D3 | 36040683 | 5.7343  | 9.7221  | -1.2324 |
| CEU | TBC1D3 | 36045683 | 10.2863 | 11.2571 | -0.2616 |
| CEU | TBC1D3 | 36050683 | 10.5925 | 10.916  | -0.0897 |
| CEU | TBC1D3 | 36055683 | 14.181  | 12.6216 | 0.3773  |
| CEU | TBC1D3 | 36060683 | 13.7728 | 11.4277 | 0.623   |
| CEU | TBC1D3 | 36065683 | 8.0625  | 7.6753  | 0.1488  |
| CEU | TBC1D3 | 36070683 | 7.1659  | 6.9931  | 0.0723  |
| CEU | TBC1D3 | 36075683 | 8.5022  | 8.5281  | -0.009  |
| CEU | TBC1D3 | 36080683 | 11.8689 | 10.7454 | 0.3162  |
| CEU | TBC1D3 | 36085683 | 10.5108 | 11.0866 | -0.1574 |
| CEU | TBC1D3 | 36090683 | 6.4947  | 8.0164  | -0.562  |
| CEU | TBC1D3 | 36095683 | 8.3453  | 7.6753  | 0.2575  |
| CEU | TBC1D3 | 36100683 | 11.8462 | 8.5281  | 1.1577  |
| CEU | TBC1D3 | 36105683 | 10.5422 | 7.3342  | 1.2853  |
| CEU | TBC1D3 | 36110683 | 5.8705  | 8.187   | -0.8392 |
| CEU | TBC1D3 | 36115683 | 5.3278  | 11.0866 | -1.5742 |
| CEU | TBC1D3 | 36120683 | 13.3496 | 12.4511 | 0.2202  |
| CEU | TBC1D3 | 36125683 | 14.5749 | 10.916  | 1.0148  |
| CEU | TBC1D3 | 36130683 | 9.0265  | 9.8926  | -0.2634 |
| CEU | TBC1D3 | 36135683 | 9.1092  | 9.5515  | -0.139  |
| CEU | TBC1D3 | 36140683 | 9.3962  | 9.2104  | 0.0604  |
| CEU | TBC1D3 | 36145683 | 6.9243  | 8.5281  | -0.5596 |
| CEU | TBC1D3 | 36150683 | 4.4032  | 7.3342  | -1.1744 |
| CEU | TBC1D3 | 36155683 | 7.247   | 9.5515  | -0.724  |
| CEU | TBC1D3 | 36160683 | 12.4877 | 11.0866 | 0.383   |
| CEU | TBC1D3 | 36165683 | 16.8042 | 13.4744 | 0.7573  |
| CEU | TBC1D3 | 36170683 | 19.53   | 17.2268 | 0.4144  |
| CEU | TBC1D3 | 36175683 | 15.4494 | 13.9861 | 0.3212  |
| CEU | TBC1D3 | 36180683 | 10.4486 | 12.4511 | -0.4907 |
| CEU | TBC1D3 | 36185683 | 7.9464  | 12.1099 | -1.0474 |
| CEU | TBC1D3 | 36190683 | 7.0903  | 10.0632 | -0.8897 |
| CEU | TBC1D3 | 36195683 | 9.0126  | 9.7221  | -0.2193 |

## 2\_TajimasD\_data

|     |        |          |         |         |         |
|-----|--------|----------|---------|---------|---------|
| CEU | TBC1D3 | 36200683 | 7.0431  | 7.8459  | -0.3024 |
| CEU | TBC1D3 | 36205683 | 5.6168  | 7.8459  | -0.8397 |
| CEU | TBC1D3 | 36210683 | 8.6574  | 9.5515  | -0.2809 |
| CEU | TBC1D3 | 36215683 | 10.2251 | 9.0398  | 0.3919  |
| CEU | TBC1D3 | 36220683 | 9.3426  | 8.187   | 0.4186  |
| CEU | TBC1D3 | 36225683 | 10.9433 | 10.0632 | 0.2634  |
| CEU | TBC1D3 | 36230683 | 10.777  | 10.2337 | 0.1601  |
| CEU | TBC1D3 | 36235683 | 7.9173  | 8.8692  | -0.3203 |
| CEU | TBC1D3 | 36240683 | 7.296   | 8.0164  | -0.2661 |
| CEU | TBC1D3 | 36245683 | 11.8306 | 9.5515  | 0.716   |
| CEU | TBC1D3 | 36250683 | 8.3455  | 6.6519  | 0.7415  |
| CEU | TBC1D3 | 36255683 | 0.5364  | 1.0234  | -0.9677 |
| CEU | TBC1D3 | 36260683 | 2.8565  | 2.2173  | 0.7141  |
| CEU | TBC1D3 | 36265683 | 2.7654  | 2.0467  | 0.8552  |
| CEU | TBC1D3 | 36270683 | 2.5152  | 1.8762  | 0.8136  |
| CEU | TBC1D3 | 36275683 | 3.2752  | 3.0701  | 0.1759  |
| CEU | TBC1D3 | 36280683 | 2.3764  | 2.5584  | -0.1813 |
| CEU | TBC1D3 | 36285683 | 1.2317  | 1.3645  | -0.2148 |
| CEU | TBC1D3 | 36290683 | 0.5042  | 0.6822  | -0.4648 |
| CEU | TBC1D3 | 36295683 | 3.0765  | 2.3879  | 0.7252  |
| CEU | TBC1D3 | 36300683 | 3.417   | 2.729   | 0.6503  |
| CEU | TBC1D3 | 36305683 | 2.2952  | 1.8762  | 0.5335  |
| CEU | TBC1D3 | 36310683 | 3.0637  | 3.4112  | -0.2729 |
| CEU | TBC1D3 | 36315683 | 2.039   | 3.4112  | -1.0778 |
| CEU | TBC1D3 | 36320683 | 0.9831  | 1.7056  | -0.9895 |
| CEU | TBC1D3 | 36325683 | 1.0262  | 0.8528  | 0.3905  |
| CEU | TBC1D3 | 36330683 | 0.7271  | 0.8528  | -0.2831 |
| CEU | TBC1D3 | 36335683 | 0.2482  | 0.6822  | -1.1333 |
| CEU | TBC1D3 | 36340683 | 0.1748  | 0.1706  | 0.0249  |
| CEU | TBC1D3 | 36345683 | 1.2432  | 0.6822  | 1.4649  |
| CEU | TBC1D3 | 36350683 | 2.3829  | 2.0467  | 0.4     |
| CEU | TBC1D3 | 36355683 | 3.2388  | 3.9229  | -0.4771 |
| CEU | TBC1D3 | 36360683 | 3.8627  | 5.2874  | -0.7661 |
| CEU | TBC1D3 | 36365683 | 3.3259  | 4.7757  | -0.8527 |
| CEU | TBC1D3 | 36370683 | 3.2826  | 5.2874  | -1.078  |
| CEU | TBC1D3 | 36375683 | 4.5255  | 5.458   | -0.4875 |
| CEU | TBC1D3 | 36380683 | 4.0973  | 3.9229  | 0.1216  |
| CEU | TBC1D3 | 36385683 | 2.106   | 3.2407  | -0.9304 |
| CEU | TBC1D3 | 36390683 | 3.1759  | 4.6052  | -0.8678 |
| CEU | TBC1D3 | 36395683 | 4.672   | 5.7991  | -0.5582 |
| CEU | TBC1D3 | 36400683 | 4.2633  | 3.7524  | 0.3701  |
| CEU | TBC1D3 | 36405683 | 3.423   | 4.7757  | -0.7956 |
| CEU | TBC1D3 | 36410683 | 2.9812  | 7.1636  | -1.7121 |
| CEU | TBC1D3 | 36415683 | 3.8223  | 7.1636  | -1.3678 |
| CEU | TBC1D3 | 36420683 | 3.2771  | 6.3108  | -1.3928 |
| CEU | TBC1D3 | 36425683 | 2.2263  | 4.9463  | -1.5512 |
| CEU | TBC1D3 | 36430683 | 3.0206  | 5.2874  | -1.2189 |
| CEU | TBC1D3 | 36435683 | 4.8757  | 7.8459  | -1.1189 |
| CEU | TBC1D3 | 36440683 | 5.6555  | 9.2104  | -1.1552 |

## 2\_TajimasD\_data

|     |        |          |         |         |         |
|-----|--------|----------|---------|---------|---------|
| CEU | TBC1D3 | 36445683 | 4.4292  | 7.6753  | -1.2477 |
| CEU | TBC1D3 | 36450683 | 3.1323  | 4.7757  | -0.9665 |
| CEU | TBC1D3 | 36455683 | 2.603   | 4.6052  | -1.2156 |
| CEU | TBC1D3 | 36460683 | 2.3218  | 5.2874  | -1.5946 |
| CEU | TBC1D3 | 36465683 | 2.1606  | 4.7757  | -1.538  |
| CEU | TBC1D3 | 36470683 | 2.0536  | 4.7757  | -1.601  |
| CEU | TBC1D3 | 36475683 | 2.4844  | 6.3108  | -1.7568 |
| CEU | TBC1D3 | 36480683 | 1.751   | 6.3108  | -2.0935 |
| CEU | TBC1D3 | 36485683 | 1.7048  | 6.6519  | -2.1659 |
| CEU | TBC1D3 | 36490683 | 3.6832  | 8.5281  | -1.6904 |
| CEU | TBC1D3 | 36495683 | 3.9384  | 6.3108  | -1.0892 |
| CEU | TBC1D3 | 36500683 | 4.0062  | 5.9697  | -0.9476 |
| CEU | TBC1D3 | 36505683 | 4.0701  | 6.8225  | -1.1777 |
| CEU | TBC1D3 | 36510683 | 3.1872  | 6.3108  | -1.4341 |
| CEU | TBC1D3 | 36515683 | 2.8994  | 5.7991  | -1.4362 |
| CEU | TBC1D3 | 36520683 | 3.134   | 4.7757  | -0.9655 |
| CEU | TBC1D3 | 36525683 | 3.8864  | 6.3108  | -1.1131 |
| CEU | TBC1D3 | 36530683 | 4.4253  | 7.6753  | -1.2492 |
| CEU | TBC1D3 | 36535683 | 4.3298  | 7.1636  | -1.16   |
| CEU | TBC1D3 | 36540683 | 7.6788  | 9.0398  | -0.45   |
| CEU | TBC1D3 | 36545683 | 8.5397  | 8.6987  | -0.0545 |
| CEU | TBC1D3 | 36550683 | 3.7526  | 5.7991  | -1.0136 |
| CEU | TBC1D3 | 36555683 | 2.4014  | 5.7991  | -1.6829 |
| CEU | TBC1D3 | 36560683 | 4.2202  | 7.5047  | -1.2887 |
| CEU | TBC1D3 | 36565683 | 6.9755  | 9.2104  | -0.7262 |
| CEU | TBC1D3 | 36570683 | 10.0666 | 9.5515  | 0.1618  |
| CEU | TBC1D3 | 36575683 | 10.9406 | 9.3809  | 0.4983  |
| CEU | TBC1D3 | 36580683 | 12.0585 | 10.5749 | 0.4239  |
| CEU | TBC1D3 | 36585683 | 8.76    | 9.2104  | -0.1464 |
| CEU | TBC1D3 | 36590683 | 10.585  | 8.6987  | 0.6462  |
| CEU | TBC1D3 | 36595683 | 13.6281 | 10.2337 | 1       |
| CEU | TBC1D3 | 36600683 | 11.3533 | 11.2571 | 0.0259  |
| CEU | TBC1D3 | 36605683 | 10.8448 | 11.7688 | -0.2388 |
| CEU | TBC1D3 | 36610683 | 10.737  | 10.4043 | 0.0965  |
| CEU | TBC1D3 | 36615683 | 10.256  | 8.6987  | 0.5335  |
| CEU | TBC1D3 | 36620683 | 8.0348  | 7.5047  | 0.208   |
| CEU | TBC1D3 | 36625683 | 10.1472 | 9.7221  | 0.1314  |
| CEU | TBC1D3 | 36630683 | 10.8579 | 10.0632 | 0.2378  |
| CEU | TBC1D3 | 36635683 | 11.1473 | 10.2337 | 0.2692  |
| CEU | TBC1D3 | 36640683 | 10.71   | 11.2571 | -0.1474 |
| CEU | TBC1D3 | 36645683 | 9.6553  | 8.6987  | 0.3277  |
| CEU | TBC1D3 | 36650683 | 12.4985 | 11.0866 | 0.3859  |
| CEU | TBC1D3 | 36655683 | 11.3688 | 11.4277 | -0.0156 |
| CEU | TBC1D3 | 36660683 | 8.2319  | 6.8225  | 0.6031  |
| CEU | TBC1D3 | 36665683 | 7.0235  | 7.1636  | -0.0573 |
| CEU | TBC1D3 | 36670683 | 8.0454  | 9.2104  | -0.3786 |
| CHB | TBC1D3 | 35670683 | 7.0695  | 6.7766  | 0.1257  |
| CHB | TBC1D3 | 35675683 | 5.746   | 6.6072  | -0.3782 |
| CHB | TBC1D3 | 35680683 | 3.3381  | 6.2684  | -1.3496 |



## 2\_TajimasD\_data

|     |        |          |         |         |         |
|-----|--------|----------|---------|---------|---------|
| CHB | TBC1D3 | 35685683 | 5.8108  | 7.7931  | -0.7492 |
| CHB | TBC1D3 | 35690683 | 7.7967  | 8.1319  | -0.1218 |
| CHB | TBC1D3 | 35695683 | 8.4535  | 7.7931  | 0.2496  |
| CHB | TBC1D3 | 35700683 | 9.1306  | 7.4543  | 0.6598  |
| CHB | TBC1D3 | 35705683 | 6.7184  | 6.4378  | 0.1262  |
| CHB | TBC1D3 | 35710683 | 4.4302  | 5.7601  | -0.6607 |
| CHB | TBC1D3 | 35715683 | 3.8896  | 6.6072  | -1.1936 |
| CHB | TBC1D3 | 35720683 | 4.8551  | 7.2848  | -0.9767 |
| CHB | TBC1D3 | 35725683 | 5.6952  | 7.9625  | -0.8402 |
| CHB | TBC1D3 | 35730683 | 3.6211  | 7.9625  | -1.6088 |
| CHB | TBC1D3 | 35735683 | 4.2935  | 8.979   | -1.5543 |
| CHB | TBC1D3 | 35740683 | 7.0348  | 9.3178  | -0.7318 |
| CHB | TBC1D3 | 35745683 | 6.8365  | 6.4378  | 0.1793  |
| CHB | TBC1D3 | 35750683 | 7.1049  | 6.4378  | 0.2999  |
| CHB | TBC1D3 | 35755683 | 7.086   | 6.946   | 0.0588  |
| CHB | TBC1D3 | 35760683 | 9.134   | 7.7931  | 0.5068  |
| CHB | TBC1D3 | 35765683 | 11.2749 | 10.3343 | 0.2738  |
| CHB | TBC1D3 | 35770683 | 9.8056  | 9.3178  | 0.1564  |
| CHB | TBC1D3 | 35775683 | 10.3067 | 8.979   | 0.4404  |
| CHB | TBC1D3 | 35780683 | 8.6172  | 9.1484  | -0.1732 |
| CHB | TBC1D3 | 35785683 | 7.0122  | 7.1154  | -0.0424 |
| CHB | TBC1D3 | 35790683 | 12.1091 | 8.6402  | 1.1924  |
| CHB | TBC1D3 | 35795683 | 12.4517 | 9.6567  | 0.8667  |
| CHB | TBC1D3 | 35800683 | 8.3958  | 8.1319  | 0.0959  |
| CHB | TBC1D3 | 35805683 | 7.4769  | 7.9625  | -0.1799 |
| CHB | TBC1D3 | 35810683 | 8.9758  | 7.6237  | 0.5214  |
| CHB | TBC1D3 | 35815683 | 11.3507 | 8.4708  | 1.0082  |
| CHB | TBC1D3 | 35820683 | 8.3695  | 7.9625  | 0.1508  |
| CHB | TBC1D3 | 35825683 | 5.5652  | 7.2848  | -0.6912 |
| CHB | TBC1D3 | 35830683 | 5.8942  | 7.7931  | -0.7177 |
| CHB | TBC1D3 | 35835683 | 4.7011  | 5.7601  | -0.5261 |
| CHB | TBC1D3 | 35840683 | 4.0208  | 5.0825  | -0.5894 |
| CHB | TBC1D3 | 35845683 | 5.3314  | 7.7931  | -0.9304 |
| CHB | TBC1D3 | 35850683 | 5.3598  | 7.7931  | -0.9197 |
| CHB | TBC1D3 | 35855683 | 7.5467  | 7.2848  | 0.1053  |
| CHB | TBC1D3 | 35860683 | 7.6117  | 7.6237  | -0.0046 |
| CHB | TBC1D3 | 35865683 | 6.5549  | 7.9625  | -0.5216 |
| CHB | TBC1D3 | 35870683 | 8.7967  | 10.1649 | -0.4045 |
| CHB | TBC1D3 | 35875683 | 6.9577  | 7.6237  | -0.2568 |
| CHB | TBC1D3 | 35880683 | 5.3404  | 5.7601  | -0.2085 |
| CHB | TBC1D3 | 35885683 | 6.6482  | 9.3178  | -0.8557 |
| CHB | TBC1D3 | 35890683 | 9.2703  | 10.1649 | -0.2645 |
| CHB | TBC1D3 | 35895683 | 8.9574  | 8.3013  | 0.234   |
| CHB | TBC1D3 | 35900683 | 5.7904  | 6.6072  | -0.3587 |
| CHB | TBC1D3 | 35905683 | 3.6453  | 5.9295  | -1.1058 |
| CHB | TBC1D3 | 35910683 | 1.921   | 4.4048  | -1.5629 |
| CHB | TBC1D3 | 35915683 | 2.6252  | 4.5742  | -1.1868 |
| CHB | TBC1D3 | 35920683 | 3.9779  | 5.5907  | -0.8229 |
| CHB | TBC1D3 | 35925683 | 4.8456  | 5.0825  | -0.1315 |

## 2\_TajimasD\_data

|     |        |          |         |         |         |
|-----|--------|----------|---------|---------|---------|
| CHB | TBC1D3 | 35930683 | 3.6785  | 6.7766  | -1.3299 |
| CHB | TBC1D3 | 35935683 | 2.4552  | 6.4378  | -1.7907 |
| CHB | TBC1D3 | 35940683 | 2.335   | 4.7436  | -1.4208 |
| CHB | TBC1D3 | 35945683 | 3.1175  | 5.7601  | -1.3129 |
| CHB | TBC1D3 | 35950683 | 6.2018  | 6.4378  | -0.1061 |
| CHB | TBC1D3 | 35955683 | 6.2519  | 5.7601  | 0.2443  |
| CHB | TBC1D3 | 35960683 | 4.3956  | 6.7766  | -1.0221 |
| CHB | TBC1D3 | 35965683 | 4.8629  | 8.1319  | -1.1882 |
| CHB | TBC1D3 | 35970683 | 6.8241  | 7.7931  | -0.3662 |
| CHB | TBC1D3 | 35975683 | 5.2123  | 6.0989  | -0.4185 |
| CHB | TBC1D3 | 35980683 | 3.4057  | 5.2519  | -0.9957 |
| CHB | TBC1D3 | 35985683 | 6.229   | 7.1154  | -0.364  |
| CHB | TBC1D3 | 35990683 | 7.0072  | 7.6237  | -0.2377 |
| CHB | TBC1D3 | 35995683 | 7.0015  | 6.7766  | 0.0965  |
| CHB | TBC1D3 | 36000683 | 6.5926  | 7.1154  | -0.2147 |
| CHB | TBC1D3 | 36005683 | 4.9726  | 6.2684  | -0.5968 |
| CHB | TBC1D3 | 36010683 | 2.9516  | 4.5742  | -0.988  |
| CHB | TBC1D3 | 36015683 | 4.0895  | 4.5742  | -0.2951 |
| CHB | TBC1D3 | 36020683 | 5.81    | 6.7766  | -0.4149 |
| CHB | TBC1D3 | 36025683 | 9.3583  | 10.1649 | -0.2384 |
| CHB | TBC1D3 | 36030683 | 10.9608 | 10.5037 | 0.131   |
| CHB | TBC1D3 | 36035683 | 4.7466  | 6.6072  | -0.8172 |
| CHB | TBC1D3 | 36040683 | 5.1963  | 7.2848  | -0.8395 |
| CHB | TBC1D3 | 36045683 | 10.5248 | 10.8426 | -0.0884 |
| CHB | TBC1D3 | 36050683 | 10.5714 | 11.3508 | -0.2078 |
| CHB | TBC1D3 | 36055683 | 13.4574 | 12.8755 | 0.1378  |
| CHB | TBC1D3 | 36060683 | 12.7167 | 10.8426 | 0.5216  |
| CHB | TBC1D3 | 36065683 | 6.8935  | 7.6237  | -0.2816 |
| CHB | TBC1D3 | 36070683 | 4.5476  | 9.4872  | -1.5571 |
| CHB | TBC1D3 | 36075683 | 5.9617  | 10.1649 | -1.2425 |
| CHB | TBC1D3 | 36080683 | 10.1932 | 11.3508 | -0.3086 |
| CHB | TBC1D3 | 36085683 | 9.4647  | 11.8591 | -0.6126 |
| CHB | TBC1D3 | 36090683 | 6.4238  | 7.7931  | -0.5175 |
| CHB | TBC1D3 | 36095683 | 6.7421  | 6.4378  | 0.1368  |
| CHB | TBC1D3 | 36100683 | 9.5353  | 8.4708  | 0.3727  |
| CHB | TBC1D3 | 36105683 | 8.2823  | 8.6402  | -0.123  |
| CHB | TBC1D3 | 36110683 | 3.8374  | 7.1154  | -1.3462 |
| CHB | TBC1D3 | 36115683 | 5.3518  | 8.6402  | -1.1303 |
| CHB | TBC1D3 | 36120683 | 12.9212 | 10.8426 | 0.5785  |
| CHB | TBC1D3 | 36125683 | 12.3339 | 9.3178  | 0.9668  |
| CHB | TBC1D3 | 36130683 | 5.8805  | 8.8096  | -0.9889 |
| CHB | TBC1D3 | 36135683 | 5.3332  | 10.5037 | -1.4824 |
| CHB | TBC1D3 | 36140683 | 7.3628  | 10.5037 | -0.9005 |
| CHB | TBC1D3 | 36145683 | 7.256   | 8.8096  | -0.5245 |
| CHB | TBC1D3 | 36150683 | 4.9996  | 6.946   | -0.817  |
| CHB | TBC1D3 | 36155683 | 6.3286  | 8.1319  | -0.6555 |
| CHB | TBC1D3 | 36160683 | 9.5625  | 9.6567  | -0.0292 |
| CHB | TBC1D3 | 36165683 | 11.4615 | 11.3508 | 0.0295  |
| CHB | TBC1D3 | 36170683 | 13.2254 | 13.2144 | 0.0025  |

## 2\_TajimasD\_data

|     |        |          |         |         |         |
|-----|--------|----------|---------|---------|---------|
| CHB | TBC1D3 | 36175683 | 12.1232 | 12.3673 | -0.06   |
| CHB | TBC1D3 | 36180683 | 7.1487  | 10.6731 | -0.9954 |
| CHB | TBC1D3 | 36185683 | 3.1222  | 8.4708  | -1.8724 |
| CHB | TBC1D3 | 36190683 | 3.9041  | 9.3178  | -1.7353 |
| CHB | TBC1D3 | 36195683 | 5.5654  | 10.1649 | -1.3597 |
| CHB | TBC1D3 | 36200683 | 4.1074  | 7.6237  | -1.356  |
| CHB | TBC1D3 | 36205683 | 5.9566  | 9.1484  | -1.0406 |
| CHB | TBC1D3 | 36210683 | 10.2368 | 13.7226 | -0.7769 |
| CHB | TBC1D3 | 36215683 | 11.2387 | 13.3838 | -0.4896 |
| CHB | TBC1D3 | 36220683 | 11.2142 | 10.8426 | 0.1034  |
| CHB | TBC1D3 | 36225683 | 13.3219 | 11.012  | 0.6336  |
| CHB | TBC1D3 | 36230683 | 11.5677 | 9.3178  | 0.7212  |
| CHB | TBC1D3 | 36235683 | 7.5772  | 7.4543  | 0.0484  |
| CHB | TBC1D3 | 36240683 | 7.9341  | 7.7931  | 0.0533  |
| CHB | TBC1D3 | 36245683 | 13.5277 | 9.9955  | 1.0607  |
| CHB | TBC1D3 | 36250683 | 9.4131  | 6.7766  | 1.1318  |
| CHB | TBC1D3 | 36255683 | 0.2953  | 1.5247  | -1.8264 |
| CHB | TBC1D3 | 36260683 | 1.2559  | 2.7106  | -1.3784 |
| CHB | TBC1D3 | 36265683 | 1.2964  | 2.7106  | -1.34   |
| CHB | TBC1D3 | 36270683 | 2.3383  | 2.8801  | -0.4885 |
| CHB | TBC1D3 | 36275683 | 3.1005  | 3.0495  | 0.0439  |
| CHB | TBC1D3 | 36280683 | 2.0729  | 1.8636  | 0.267   |
| CHB | TBC1D3 | 36285683 | 1.0522  | 1.0165  | 0.071   |
| CHB | TBC1D3 | 36290683 | 0.5104  | 1.1859  | -1.2058 |
| CHB | TBC1D3 | 36295683 | 3.1767  | 2.7106  | 0.4417  |
| CHB | TBC1D3 | 36300683 | 3.9813  | 3.0495  | 0.8014  |
| CHB | TBC1D3 | 36305683 | 2.4573  | 2.033   | 0.506   |
| CHB | TBC1D3 | 36310683 | 2.7419  | 2.5412  | 0.2004  |
| CHB | TBC1D3 | 36315683 | 2.0362  | 2.033   | 0.0038  |
| CHB | TBC1D3 | 36320683 | 0.8865  | 0.8471  | 0.0888  |
| CHB | TBC1D3 | 36325683 | 0.533   | 1.0165  | -0.9622 |
| CHB | TBC1D3 | 36330683 | 0.5804  | 1.0165  | -0.8679 |
| CHB | TBC1D3 | 36335683 | 0.4493  | 0.5082  | -0.1849 |
| CHB | TBC1D3 | 36340683 | 0.0752  | 0.1694  | -0.5598 |
| CHB | TBC1D3 | 36345683 | 1.0466  | 0.5082  | 1.6901  |
| CHB | TBC1D3 | 36350683 | 1.6956  | 1.8636  | -0.2143 |
| CHB | TBC1D3 | 36355683 | 2.268   | 3.3883  | -0.8823 |
| CHB | TBC1D3 | 36360683 | 3.4908  | 4.2354  | -0.4847 |
| CHB | TBC1D3 | 36365683 | 3.0204  | 3.8965  | -0.6128 |
| CHB | TBC1D3 | 36370683 | 3.2625  | 3.7271  | -0.3375 |
| CHB | TBC1D3 | 36375683 | 5.4405  | 4.7436  | 0.4111  |
| CHB | TBC1D3 | 36380683 | 4.7573  | 4.5742  | 0.1115  |
| CHB | TBC1D3 | 36385683 | 2.0131  | 4.066   | -1.3843 |
| CHB | TBC1D3 | 36390683 | 2.3979  | 4.5742  | -1.3252 |
| CHB | TBC1D3 | 36395683 | 3.783   | 5.5907  | -0.9223 |
| CHB | TBC1D3 | 36400683 | 3.846   | 4.913   | -0.6103 |
| CHB | TBC1D3 | 36405683 | 2.4731  | 5.7601  | -1.6331 |
| CHB | TBC1D3 | 36410683 | 0.8355  | 6.7766  | -2.5503 |
| CHB | TBC1D3 | 36415683 | 1.6067  | 5.9295  | -2.0927 |

## 2\_TajimasD\_data

|     |        |          |         |         |         |
|-----|--------|----------|---------|---------|---------|
| CHB | TBC1D3 | 36420683 | 1.616   | 5.7601  | -2.0589 |
| CHB | TBC1D3 | 36425683 | 0.6044  | 5.9295  | -2.578  |
| CHB | TBC1D3 | 36430683 | 0.853   | 6.0989  | -2.4763 |
| CHB | TBC1D3 | 36435683 | 1.5279  | 6.946   | -2.2743 |
| CHB | TBC1D3 | 36440683 | 1.6027  | 9.3178  | -2.473  |
| CHB | TBC1D3 | 36445683 | 1.1571  | 10.3343 | -2.6714 |
| CHB | TBC1D3 | 36450683 | 1.296   | 9.1484  | -2.5602 |
| CHB | TBC1D3 | 36455683 | 0.9817  | 6.7766  | -2.4875 |
| CHB | TBC1D3 | 36460683 | 1.8374  | 6.946   | -2.1444 |
| CHB | TBC1D3 | 36465683 | 2.7095  | 7.1154  | -1.8094 |
| CHB | TBC1D3 | 36470683 | 2.7651  | 7.9625  | -1.926  |
| CHB | TBC1D3 | 36475683 | 4.1053  | 9.8261  | -1.7454 |
| CHB | TBC1D3 | 36480683 | 2.6665  | 7.4543  | -1.8846 |
| CHB | TBC1D3 | 36485683 | 1.38    | 6.946   | -2.3364 |
| CHB | TBC1D3 | 36490683 | 3.3876  | 7.6237  | -1.6336 |
| CHB | TBC1D3 | 36495683 | 3.4538  | 6.946   | -1.4659 |
| CHB | TBC1D3 | 36500683 | 2.6629  | 7.4543  | -1.886  |
| CHB | TBC1D3 | 36505683 | 3.0017  | 6.4378  | -1.545  |
| CHB | TBC1D3 | 36510683 | 3.1711  | 4.2354  | -0.6929 |
| CHB | TBC1D3 | 36515683 | 3.6391  | 4.2354  | -0.3882 |
| CHB | TBC1D3 | 36520683 | 4.7162  | 6.0989  | -0.6527 |
| CHB | TBC1D3 | 36525683 | 5.3634  | 7.1154  | -0.7195 |
| CHB | TBC1D3 | 36530683 | 5.6996  | 7.2848  | -0.6372 |
| CHB | TBC1D3 | 36535683 | 6.0933  | 7.7931  | -0.6424 |
| CHB | TBC1D3 | 36540683 | 9.8536  | 11.012  | -0.3177 |
| CHB | TBC1D3 | 36545683 | 10.4544 | 11.012  | -0.1529 |
| CHB | TBC1D3 | 36550683 | 4.7122  | 7.7931  | -1.1644 |
| CHB | TBC1D3 | 36555683 | 3.3181  | 7.1154  | -1.5594 |
| CHB | TBC1D3 | 36560683 | 6.8804  | 7.9625  | -0.401  |
| CHB | TBC1D3 | 36565683 | 10.5987 | 9.9955  | 0.1811  |
| CHB | TBC1D3 | 36570683 | 10.5458 | 10.1649 | 0.1126  |
| CHB | TBC1D3 | 36575683 | 11.581  | 11.012  | 0.1561  |
| CHB | TBC1D3 | 36580683 | 13.3889 | 10.3343 | 0.8892  |
| CHB | TBC1D3 | 36585683 | 7.3489  | 7.7931  | -0.1679 |
| CHB | TBC1D3 | 36590683 | 9.3575  | 9.8261  | -0.143  |
| CHB | TBC1D3 | 36595683 | 12.0274 | 10.8426 | 0.3297  |
| CHB | TBC1D3 | 36600683 | 8.6914  | 10.8426 | -0.5987 |
| CHB | TBC1D3 | 36605683 | 7.2823  | 10.6731 | -0.9577 |
| CHB | TBC1D3 | 36610683 | 8.7647  | 8.979   | -0.0711 |
| CHB | TBC1D3 | 36615683 | 9.637   | 8.6402  | 0.3426  |
| CHB | TBC1D3 | 36620683 | 5.4997  | 9.1484  | -1.1896 |
| CHB | TBC1D3 | 36625683 | 8.6836  | 9.8261  | -0.3486 |
| CHB | TBC1D3 | 36630683 | 10.8935 | 9.6567  | 0.3835  |
| CHB | TBC1D3 | 36635683 | 10.8718 | 8.8096  | 0.6963  |
| CHB | TBC1D3 | 36640683 | 9.2983  | 7.4543  | 0.7258  |
| CHB | TBC1D3 | 36645683 | 6.644   | 8.4708  | -0.6395 |
| CHB | TBC1D3 | 36650683 | 9.0554  | 12.0285 | -0.7506 |
| CHB | TBC1D3 | 36655683 | 9.6202  | 10.5037 | -0.2533 |
| CHB | TBC1D3 | 36660683 | 6.6014  | 6.946   | -0.1446 |

## 2\_TajimasD\_data

|     |        |          |         |         |         |
|-----|--------|----------|---------|---------|---------|
| CHB | TBC1D3 | 36665683 | 4.0857  | 8.1319  | -1.4707 |
| CHB | TBC1D3 | 36670683 | 6.5058  | 10.6731 | -1.177  |
| YRI | TBC1D3 | 35670683 | 7.1751  | 9.9157  | -0.8263 |
| YRI | TBC1D3 | 35675683 | 7.116   | 9.7476  | -0.8062 |
| YRI | TBC1D3 | 35680683 | 5.0057  | 9.2434  | -1.3638 |
| YRI | TBC1D3 | 35685683 | 6.4637  | 10.5879 | -1.1696 |
| YRI | TBC1D3 | 35690683 | 8.5046  | 12.6047 | -0.987  |
| YRI | TBC1D3 | 35695683 | 10.2407 | 12.1005 | -0.4653 |
| YRI | TBC1D3 | 35700683 | 10.213  | 10.2518 | -0.0113 |
| YRI | TBC1D3 | 35705683 | 7.6207  | 10.2518 | -0.769  |
| YRI | TBC1D3 | 35710683 | 6.173   | 10.5879 | -1.252  |
| YRI | TBC1D3 | 35715683 | 6.7167  | 10.924  | -1.1588 |
| YRI | TBC1D3 | 35720683 | 9.6493  | 11.4282 | -0.4696 |
| YRI | TBC1D3 | 35725683 | 8.8946  | 12.2685 | -0.8332 |
| YRI | TBC1D3 | 35730683 | 6.2114  | 12.2685 | -1.4958 |
| YRI | TBC1D3 | 35735683 | 9.6216  | 14.9575 | -1.092  |
| YRI | TBC1D3 | 35740683 | 10.3468 | 16.134  | -1.1019 |
| YRI | TBC1D3 | 35745683 | 7.0003  | 11.9324 | -1.2503 |
| YRI | TBC1D3 | 35750683 | 7.8142  | 10.2518 | -0.7124 |
| YRI | TBC1D3 | 35755683 | 8.3838  | 11.9324 | -0.8996 |
| YRI | TBC1D3 | 35760683 | 9.2985  | 13.613  | -0.9657 |
| YRI | TBC1D3 | 35765683 | 11.4366 | 14.2853 | -0.6091 |
| YRI | TBC1D3 | 35770683 | 9.5587  | 13.1089 | -0.8235 |
| YRI | TBC1D3 | 35775683 | 9.152   | 13.9492 | -1.0491 |
| YRI | TBC1D3 | 35780683 | 11.0446 | 14.9575 | -0.8008 |
| YRI | TBC1D3 | 35785683 | 10.3227 | 12.2685 | -0.4805 |
| YRI | TBC1D3 | 35790683 | 10.5607 | 11.7644 | -0.3092 |
| YRI | TBC1D3 | 35795683 | 11.2445 | 13.7811 | -0.5612 |
| YRI | TBC1D3 | 35800683 | 9.4576  | 13.1089 | -0.847  |
| YRI | TBC1D3 | 35805683 | 9.999   | 12.6047 | -0.6273 |
| YRI | TBC1D3 | 35810683 | 11.8035 | 13.2769 | -0.3377 |
| YRI | TBC1D3 | 35815683 | 13.2496 | 16.134  | -0.5492 |
| YRI | TBC1D3 | 35820683 | 11.4498 | 14.2853 | -0.6063 |
| YRI | TBC1D3 | 35825683 | 8.7165  | 10.4199 | -0.4904 |
| YRI | TBC1D3 | 35830683 | 9.3082  | 12.9408 | -0.853  |
| YRI | TBC1D3 | 35835683 | 7.4388  | 12.7727 | -1.2681 |
| YRI | TBC1D3 | 35840683 | 6.6357  | 10.0837 | -1.0234 |
| YRI | TBC1D3 | 35845683 | 9.9095  | 10.4199 | -0.1469 |
| YRI | TBC1D3 | 35850683 | 8.2915  | 10.4199 | -0.6127 |
| YRI | TBC1D3 | 35855683 | 7.8267  | 12.2685 | -1.0969 |
| YRI | TBC1D3 | 35860683 | 8.8711  | 13.1089 | -0.983  |
| YRI | TBC1D3 | 35865683 | 8.1057  | 12.7727 | -1.1095 |
| YRI | TBC1D3 | 35870683 | 11.0425 | 15.4617 | -0.8763 |
| YRI | TBC1D3 | 35875683 | 8.7567  | 14.1172 | -1.1591 |
| YRI | TBC1D3 | 35880683 | 6.4105  | 12.1005 | -1.4235 |
| YRI | TBC1D3 | 35885683 | 7.7951  | 13.445  | -1.2795 |
| YRI | TBC1D3 | 35890683 | 8.3483  | 13.613  | -1.1783 |
| YRI | TBC1D3 | 35895683 | 8.1509  | 12.1005 | -0.9881 |
| YRI | TBC1D3 | 35900683 | 6.6704  | 11.9324 | -1.3339 |

## 2\_TajimasD\_data

|     |        |          |         |         |         |
|-----|--------|----------|---------|---------|---------|
| YRI | TBC1D3 | 35905683 | 5.9708  | 11.2602 | -1.416  |
| YRI | TBC1D3 | 35910683 | 4.0959  | 8.235   | -1.482  |
| YRI | TBC1D3 | 35915683 | 3.8319  | 8.7392  | -1.6634 |
| YRI | TBC1D3 | 35920683 | 5.3374  | 10.4199 | -1.4631 |
| YRI | TBC1D3 | 35925683 | 5.6343  | 11.2602 | -1.5061 |
| YRI | TBC1D3 | 35930683 | 5.5757  | 12.4366 | -1.6727 |
| YRI | TBC1D3 | 35935683 | 4.8305  | 10.0837 | -1.5592 |
| YRI | TBC1D3 | 35940683 | 4.3201  | 9.2434  | -1.5845 |
| YRI | TBC1D3 | 35945683 | 5.128   | 10.4199 | -1.5234 |
| YRI | TBC1D3 | 35950683 | 6.2669  | 9.9157  | -1.1001 |
| YRI | TBC1D3 | 35955683 | 6.8389  | 10.5879 | -1.0632 |
| YRI | TBC1D3 | 35960683 | 6.09    | 12.1005 | -1.5037 |
| YRI | TBC1D3 | 35965683 | 7.0059  | 12.9408 | -1.3936 |
| YRI | TBC1D3 | 35970683 | 8.7092  | 12.2685 | -0.879  |
| YRI | TBC1D3 | 35975683 | 6.8422  | 10.4199 | -1.0299 |
| YRI | TBC1D3 | 35980683 | 4.8576  | 9.0754  | -1.3807 |
| YRI | TBC1D3 | 35985683 | 7.1456  | 10.5879 | -0.9762 |
| YRI | TBC1D3 | 35990683 | 8.4531  | 11.5963 | -0.8185 |
| YRI | TBC1D3 | 35995683 | 7.1744  | 10.756  | -1.0009 |
| YRI | TBC1D3 | 36000683 | 8.7059  | 12.9408 | -0.9944 |
| YRI | TBC1D3 | 36005683 | 8.6025  | 12.6047 | -0.9634 |
| YRI | TBC1D3 | 36010683 | 5.0479  | 10.2518 | -1.521  |
| YRI | TBC1D3 | 36015683 | 5.8636  | 11.4282 | -1.4691 |
| YRI | TBC1D3 | 36020683 | 7.2399  | 13.7811 | -1.4471 |
| YRI | TBC1D3 | 36025683 | 11.8771 | 15.6298 | -0.7365 |
| YRI | TBC1D3 | 36030683 | 13.5936 | 14.4534 | -0.1818 |
| YRI | TBC1D3 | 36035683 | 7.4487  | 11.4282 | -1.0506 |
| YRI | TBC1D3 | 36040683 | 9.5017  | 12.4366 | -0.7155 |
| YRI | TBC1D3 | 36045683 | 15.904  | 14.9575 | 0.1937  |
| YRI | TBC1D3 | 36050683 | 15.4862 | 17.3104 | -0.3247 |
| YRI | TBC1D3 | 36055683 | 15.4044 | 18.1507 | -0.4671 |
| YRI | TBC1D3 | 36060683 | 13.7384 | 14.7895 | -0.2174 |
| YRI | TBC1D3 | 36065683 | 8.6646  | 11.5963 | -0.7634 |
| YRI | TBC1D3 | 36070683 | 6.3916  | 10.924  | -1.2483 |
| YRI | TBC1D3 | 36075683 | 6.1662  | 12.9408 | -1.5908 |
| YRI | TBC1D3 | 36080683 | 10.6374 | 14.9575 | -0.8841 |
| YRI | TBC1D3 | 36085683 | 11.786  | 14.9575 | -0.6491 |
| YRI | TBC1D3 | 36090683 | 8.0856  | 12.1005 | -1.0044 |
| YRI | TBC1D3 | 36095683 | 9.1709  | 11.7644 | -0.6663 |
| YRI | TBC1D3 | 36100683 | 11.5646 | 15.1256 | -0.7211 |
| YRI | TBC1D3 | 36105683 | 8.826   | 13.445  | -1.0461 |
| YRI | TBC1D3 | 36110683 | 7.011   | 12.7727 | -1.3698 |
| YRI | TBC1D3 | 36115683 | 9.3602  | 14.9575 | -1.1455 |
| YRI | TBC1D3 | 36120683 | 14.895  | 15.9659 | -0.2059 |
| YRI | TBC1D3 | 36125683 | 16.4245 | 15.4617 | 0.1909  |
| YRI | TBC1D3 | 36130683 | 12.9199 | 14.7895 | -0.3868 |
| YRI | TBC1D3 | 36135683 | 11.6751 | 15.2937 | -0.7251 |
| YRI | TBC1D3 | 36140683 | 12.5592 | 17.3104 | -0.8457 |
| YRI | TBC1D3 | 36145683 | 11.1493 | 16.302  | -0.9714 |

## 2\_TajimasD\_data

|     |        |          |         |         |         |
|-----|--------|----------|---------|---------|---------|
| YRI | TBC1D3 | 36150683 | 7.3609  | 14.7895 | -1.5368 |
| YRI | TBC1D3 | 36155683 | 9.8668  | 17.8146 | -1.3763 |
| YRI | TBC1D3 | 36160683 | 15.0599 | 16.8062 | -0.3198 |
| YRI | TBC1D3 | 36165683 | 20.3304 | 17.3104 | 0.5376  |
| YRI | TBC1D3 | 36170683 | 24.1217 | 19.9994 | 0.6387  |
| YRI | TBC1D3 | 36175683 | 21.1653 | 16.8062 | 0.7982  |
| YRI | TBC1D3 | 36180683 | 19.2771 | 16.134  | 0.5984  |
| YRI | TBC1D3 | 36185683 | 17.3732 | 16.6382 | 0.1359  |
| YRI | TBC1D3 | 36190683 | 13.182  | 16.134  | -0.5621 |
| YRI | TBC1D3 | 36195683 | 11.5125 | 15.9659 | -0.8564 |
| YRI | TBC1D3 | 36200683 | 9.7719  | 15.2937 | -1.1064 |
| YRI | TBC1D3 | 36205683 | 8.5137  | 17.8146 | -1.6106 |
| YRI | TBC1D3 | 36210683 | 11.134  | 20.1675 | -1.3884 |
| YRI | TBC1D3 | 36215683 | 11.404  | 18.6549 | -1.2012 |
| YRI | TBC1D3 | 36220683 | 10.7066 | 15.4617 | -0.9429 |
| YRI | TBC1D3 | 36225683 | 14.4181 | 15.7978 | -0.268  |
| YRI | TBC1D3 | 36230683 | 12.5781 | 15.1256 | -0.5158 |
| YRI | TBC1D3 | 36235683 | 10.4432 | 16.9743 | -1.1846 |
| YRI | TBC1D3 | 36240683 | 12.1179 | 19.9994 | -1.2211 |
| YRI | TBC1D3 | 36245683 | 16.2188 | 20.1675 | -0.6069 |
| YRI | TBC1D3 | 36250683 | 10.5648 | 11.7644 | -0.3082 |
| YRI | TBC1D3 | 36255683 | 0.9255  | 2.8571  | -1.7468 |
| YRI | TBC1D3 | 36260683 | 2.7147  | 4.3696  | -1.0449 |
| YRI | TBC1D3 | 36265683 | 3.1372  | 4.7057  | -0.9285 |
| YRI | TBC1D3 | 36270683 | 3.6115  | 5.7141  | -1.0485 |
| YRI | TBC1D3 | 36275683 | 3.7952  | 6.3864  | -1.1695 |
| YRI | TBC1D3 | 36280683 | 1.5429  | 3.8654  | -1.6298 |
| YRI | TBC1D3 | 36285683 | 0.3984  | 1.5126  | -1.6591 |
| YRI | TBC1D3 | 36290683 | 1.012   | 1.1764  | -0.294  |
| YRI | TBC1D3 | 36295683 | 3.4327  | 4.0335  | -0.4065 |
| YRI | TBC1D3 | 36300683 | 4.3503  | 6.8906  | -1.0704 |
| YRI | TBC1D3 | 36305683 | 3.2847  | 5.378   | -1.1017 |
| YRI | TBC1D3 | 36310683 | 2.898   | 3.8654  | -0.6789 |
| YRI | TBC1D3 | 36315683 | 2.1176  | 3.3612  | -0.9825 |
| YRI | TBC1D3 | 36320683 | 1.6463  | 2.5209  | -0.8759 |
| YRI | TBC1D3 | 36325683 | 1.8229  | 2.3529  | -0.561  |
| YRI | TBC1D3 | 36330683 | 1.3492  | 1.6806  | -0.4559 |
| YRI | TBC1D3 | 36335683 | 0.5794  | 0.6722  | -0.2429 |
| YRI | TBC1D3 | 36340683 | 0.2336  | 0.1681  | 0.3894  |
| YRI | TBC1D3 | 36345683 | 1.3579  | 1.3445  | 0.0218  |
| YRI | TBC1D3 | 36350683 | 2.2871  | 4.0335  | -1.1816 |
| YRI | TBC1D3 | 36355683 | 3.8069  | 5.8822  | -1.0084 |
| YRI | TBC1D3 | 36360683 | 4.9569  | 5.378   | -0.2216 |
| YRI | TBC1D3 | 36365683 | 3.6315  | 5.2099  | -0.8544 |
| YRI | TBC1D3 | 36370683 | 4.2227  | 6.2183  | -0.9226 |
| YRI | TBC1D3 | 36375683 | 5.8059  | 6.5544  | -0.33   |
| YRI | TBC1D3 | 36380683 | 5.1837  | 6.8906  | -0.7192 |
| YRI | TBC1D3 | 36385683 | 3.335   | 6.8906  | -1.4982 |
| YRI | TBC1D3 | 36390683 | 4.637   | 9.0754  | -1.4529 |

## 2\_TajimasD\_data

|     |        |          |         |         |         |
|-----|--------|----------|---------|---------|---------|
| YRI | TBC1D3 | 36395683 | 6.575   | 10.2518 | -1.0746 |
| YRI | TBC1D3 | 36400683 | 5.614   | 7.2267  | -0.6508 |
| YRI | TBC1D3 | 36405683 | 6.6784  | 10.2518 | -1.0444 |
| YRI | TBC1D3 | 36410683 | 9.1841  | 13.7811 | -1.017  |
| YRI | TBC1D3 | 36415683 | 9.2444  | 12.6047 | -0.8089 |
| YRI | TBC1D3 | 36420683 | 7.9559  | 10.924  | -0.8175 |
| YRI | TBC1D3 | 36425683 | 8.1037  | 9.4115  | -0.4139 |
| YRI | TBC1D3 | 36430683 | 9.197   | 12.4366 | -0.7898 |
| YRI | TBC1D3 | 36435683 | 13.5099 | 14.6214 | -0.2325 |
| YRI | TBC1D3 | 36440683 | 17.8159 | 14.1172 | 0.7998  |
| YRI | TBC1D3 | 36445683 | 16.8473 | 14.6214 | 0.4655  |
| YRI | TBC1D3 | 36450683 | 12.9498 | 14.2853 | -0.2855 |
| YRI | TBC1D3 | 36455683 | 10.5788 | 14.2853 | -0.7925 |
| YRI | TBC1D3 | 36460683 | 10.3048 | 13.9492 | -0.797  |
| YRI | TBC1D3 | 36465683 | 8.1227  | 12.4366 | -1.0517 |
| YRI | TBC1D3 | 36470683 | 8.4351  | 14.9575 | -1.3349 |
| YRI | TBC1D3 | 36475683 | 12.5116 | 15.6298 | -0.612  |
| YRI | TBC1D3 | 36480683 | 8.8428  | 10.2518 | -0.4118 |
| YRI | TBC1D3 | 36485683 | 6.6247  | 10.2518 | -1.0601 |
| YRI | TBC1D3 | 36490683 | 8.8471  | 12.2685 | -0.8449 |
| YRI | TBC1D3 | 36495683 | 7.2133  | 11.4282 | -1.1127 |
| YRI | TBC1D3 | 36500683 | 8.0331  | 13.613  | -1.2489 |
| YRI | TBC1D3 | 36505683 | 8.6368  | 13.2769 | -1.0634 |
| YRI | TBC1D3 | 36510683 | 5.9353  | 9.7476  | -1.1679 |
| YRI | TBC1D3 | 36515683 | 6.2727  | 11.7644 | -1.4108 |
| YRI | TBC1D3 | 36520683 | 7.1691  | 11.4282 | -1.1244 |
| YRI | TBC1D3 | 36525683 | 7.213   | 11.5963 | -1.1414 |
| YRI | TBC1D3 | 36530683 | 7.9188  | 12.2685 | -1.0741 |
| YRI | TBC1D3 | 36535683 | 7.8042  | 10.5879 | -0.7894 |
| YRI | TBC1D3 | 36540683 | 12.8016 | 16.134  | -0.6345 |
| YRI | TBC1D3 | 36545683 | 13.9383 | 16.6382 | -0.4992 |
| YRI | TBC1D3 | 36550683 | 7.1511  | 10.4199 | -0.941  |
| YRI | TBC1D3 | 36555683 | 6.4215  | 9.7476  | -1.0189 |
| YRI | TBC1D3 | 36560683 | 11.3572 | 13.613  | -0.5049 |
| YRI | TBC1D3 | 36565683 | 14.9753 | 15.9659 | -0.1905 |
| YRI | TBC1D3 | 36570683 | 17.0611 | 16.9743 | 0.0157  |
| YRI | TBC1D3 | 36575683 | 17.3965 | 16.302  | 0.2063  |
| YRI | TBC1D3 | 36580683 | 15.8403 | 17.4785 | -0.2889 |
| YRI | TBC1D3 | 36585683 | 11.5238 | 16.9743 | -0.9886 |
| YRI | TBC1D3 | 36590683 | 12.6773 | 17.3104 | -0.8247 |
| YRI | TBC1D3 | 36595683 | 14.9938 | 19.6633 | -0.7354 |
| YRI | TBC1D3 | 36600683 | 17.2546 | 17.8146 | -0.097  |
| YRI | TBC1D3 | 36605683 | 18.7711 | 16.4701 | 0.4296  |
| YRI | TBC1D3 | 36610683 | 14.5659 | 15.4617 | -0.1776 |
| YRI | TBC1D3 | 36615683 | 12.9984 | 15.6298 | -0.5164 |
| YRI | TBC1D3 | 36620683 | 12.1995 | 15.6298 | -0.6732 |
| YRI | TBC1D3 | 36625683 | 13.0993 | 17.4785 | -0.7723 |
| YRI | TBC1D3 | 36630683 | 11.3605 | 14.9575 | -0.7362 |
| YRI | TBC1D3 | 36635683 | 7.9989  | 12.6047 | -1.1087 |



## 2\_TajimasD\_data

|     |        |          |         |         |         |
|-----|--------|----------|---------|---------|---------|
| YRI | TBC1D3 | 36640683 | 8.7137  | 16.6382 | -1.4651 |
| YRI | TBC1D3 | 36645683 | 11.9617 | 16.6382 | -0.8646 |
| YRI | TBC1D3 | 36650683 | 18.6221 | 15.9659 | 0.5108  |
| YRI | TBC1D3 | 36655683 | 16.4534 | 15.4617 | 0.1966  |
| YRI | TBC1D3 | 36660683 | 10.043  | 14.4534 | -0.9326 |
| YRI | TBC1D3 | 36665683 | 11.1389 | 13.613  | -0.5538 |
| YRI | TBC1D3 | 36670683 | 12.7065 | 15.6298 | -0.5737 |
| CEU | TBC1D3 | 35758639 | 9.9163  | 9.3809  | 0.171   |
| CEU | TBC1D3 | 35763639 | 11.745  | 9.0398  | 0.8944  |
| CEU | TBC1D3 | 35768639 | 11.1738 | 9.3809  | 0.5728  |
| CEU | TBC1D3 | 35773639 | 10.1956 | 9.2104  | 0.3201  |
| CEU | TBC1D3 | 35778639 | 11.0829 | 8.6987  | 0.8168  |
| CEU | TBC1D3 | 35783639 | 11.6984 | 8.6987  | 1.0277  |
| CEU | TBC1D3 | 35788639 | 10.7588 | 7.6753  | 1.1852  |
| CEU | TBC1D3 | 35793639 | 12.6885 | 10.4043 | 0.6626  |
| CEU | TBC1D3 | 35798639 | 10.7011 | 9.7221  | 0.3025  |
| CEU | TBC1D3 | 35803639 | 8.4302  | 7.3342  | 0.4391  |
| CEU | TBC1D3 | 35808639 | 9.1791  | 7.6753  | 0.578   |
| CEU | TBC1D3 | 35813639 | 13.2515 | 10.5749 | 0.7648  |
| CEU | TBC1D3 | 35818639 | 12.6959 | 10.4043 | 0.6648  |
| CEU | TBC1D3 | 35823639 | 8.7947  | 8.3576  | 0.1554  |
| CEU | TBC1D3 | 35828639 | 10.6021 | 9.5515  | 0.3301  |
| CEU | TBC1D3 | 35833639 | 7.9586  | 8.5281  | -0.1987 |
| CEU | TBC1D3 | 35838639 | 6.5411  | 8.3576  | -0.6457 |
| CEU | TBC1D3 | 35843639 | 8.5106  | 8.6987  | -0.0644 |
| CEU | TBC1D3 | 35848639 | 9.4164  | 8.0164  | 0.5171  |
| CEU | TBC1D3 | 35853639 | 9.1431  | 8.0164  | 0.4162  |
| CEU | TBC1D3 | 35858639 | 9.2562  | 8.0164  | 0.4579  |
| CEU | TBC1D3 | 35863639 | 9.3661  | 7.6753  | 0.6499  |
| CEU | TBC1D3 | 35868639 | 8.2216  | 7.5047  | 0.2813  |
| CEU | TBC1D3 | 35873639 | 10.2042 | 8.8692  | 0.4492  |
| CEU | TBC1D3 | 35878639 | 8.553   | 8.5281  | 0.0087  |
| CEU | TBC1D3 | 35883639 | 6.5114  | 7.5047  | -0.3897 |
| CEU | TBC1D3 | 35888639 | 8.2839  | 7.8459  | 0.165   |
| CEU | TBC1D3 | 35893639 | 7.9505  | 6.4814  | 0.6585  |
| CEU | TBC1D3 | 35898639 | 7.597   | 6.6519  | 0.4138  |
| CEU | TBC1D3 | 35903639 | 5.1117  | 5.7991  | -0.3405 |
| CEU | TBC1D3 | 35908639 | 2.9491  | 4.6052  | -1.0055 |
| CEU | TBC1D3 | 35913639 | 2.6246  | 4.6052  | -1.2025 |
| CEU | TBC1D3 | 35918639 | 3.1293  | 4.4346  | -0.819  |
| CEU | TBC1D3 | 35923639 | 4.3109  | 4.4346  | -0.0776 |
| CEU | TBC1D3 | 35928639 | 4.683   | 5.1169  | -0.2402 |
| CEU | TBC1D3 | 35933639 | 4.5312  | 6.1402  | -0.7572 |
| CEU | TBC1D3 | 35938639 | 2.9095  | 5.1169  | -1.2218 |
| CEU | TBC1D3 | 35943639 | 2.7747  | 4.4346  | -1.0415 |
| CEU | TBC1D3 | 35948639 | 4.2468  | 6.1402  | -0.891  |
| CEU | TBC1D3 | 35953639 | 5.363   | 6.9931  | -0.6821 |
| CEU | TBC1D3 | 35958639 | 5.4403  | 6.3108  | -0.3997 |
| CEU | TBC1D3 | 35963639 | 4.9685  | 5.7991  | -0.4114 |

## 2\_TajimasD\_data

|     |        |          |         |         |         |
|-----|--------|----------|---------|---------|---------|
| CEU | TBC1D3 | 35968639 | 6.5706  | 6.8225  | -0.1078 |
| CEU | TBC1D3 | 35973639 | 5.1631  | 5.7991  | -0.315  |
| CEU | TBC1D3 | 35978639 | 2.5471  | 4.9463  | -1.3683 |
| CEU | TBC1D3 | 35983639 | 4.5393  | 6.6519  | -0.9249 |
| CEU | TBC1D3 | 35988639 | 4.9854  | 6.1402  | -0.5434 |
| CEU | TBC1D3 | 35993639 | 4.021   | 5.7991  | -0.8807 |
| CEU | TBC1D3 | 35998639 | 5.4096  | 6.8225  | -0.6046 |
| CEU | TBC1D3 | 36003639 | 4.6844  | 5.7991  | -0.5521 |
| CEU | TBC1D3 | 36008639 | 2.5521  | 3.7524  | -0.8696 |
| CEU | TBC1D3 | 36013639 | 3.4084  | 4.6052  | -0.7266 |
| CEU | TBC1D3 | 36018639 | 4.3438  | 5.1169  | -0.4279 |
| CEU | TBC1D3 | 36023639 | 4.9775  | 5.6286  | -0.3312 |
| CEU | TBC1D3 | 36028639 | 8.1165  | 9.0398  | -0.3053 |
| CEU | TBC1D3 | 36033639 | 8.8116  | 9.3809  | -0.1819 |
| CEU | TBC1D3 | 36038639 | 6.7157  | 10.0632 | -1.0018 |
| CEU | TBC1D3 | 36043639 | 8.0872  | 10.7454 | -0.7482 |
| CEU | TBC1D3 | 36048639 | 9.1216  | 9.7221  | -0.1856 |
| CEU | TBC1D3 | 36053639 | 10.7234 | 11.4277 | -0.1871 |
| CEU | TBC1D3 | 36058639 | 15.0862 | 11.9394 | 0.8023  |
| CEU | TBC1D3 | 36063639 | 12.745  | 9.7221  | 0.9342  |
| CEU | TBC1D3 | 36068639 | 7.126   | 7.6753  | -0.2111 |
| CEU | TBC1D3 | 36073639 | 7.6786  | 8.187   | -0.1842 |
| CEU | TBC1D3 | 36078639 | 9.3754  | 8.5281  | 0.2956  |
| CEU | TBC1D3 | 36083639 | 11.3529 | 11.2571 | 0.0258  |
| CEU | TBC1D3 | 36088639 | 9.9241  | 10.5749 | -0.1859 |
| CEU | TBC1D3 | 36093639 | 7.4935  | 6.9931  | 0.2094  |
| CEU | TBC1D3 | 36098639 | 11.1769 | 8.0164  | 1.1673  |
| CEU | TBC1D3 | 36103639 | 11.0987 | 8.8692  | 0.7502  |
| CEU | TBC1D3 | 36108639 | 6.2818  | 8.187   | -0.6902 |
| CEU | TBC1D3 | 36113639 | 5.551   | 9.0398  | -1.1535 |
| CEU | TBC1D3 | 36118639 | 11.5075 | 11.7688 | -0.0675 |
| CEU | TBC1D3 | 36123639 | 14.0948 | 11.5982 | 0.6541  |
| CEU | TBC1D3 | 36128639 | 10.1102 | 10.2337 | -0.0364 |
| CEU | TBC1D3 | 36133639 | 7.6119  | 9.2104  | -0.5194 |
| CEU | TBC1D3 | 36138639 | 10.6019 | 10.5749 | 0.0077  |
| CEU | TBC1D3 | 36143639 | 9.2364  | 9.3809  | -0.0462 |
| CEU | TBC1D3 | 36148639 | 4.2344  | 6.6519  | -1.0584 |
| CEU | TBC1D3 | 36153639 | 6.3566  | 8.3576  | -0.7113 |
| CEU | TBC1D3 | 36158639 | 8.7458  | 10.2337 | -0.4383 |
| CEU | TBC1D3 | 36163639 | 15.0497 | 13.3039 | 0.4019  |
| CEU | TBC1D3 | 36168639 | 19.4368 | 15.5212 | 0.7784  |
| CEU | TBC1D3 | 36173639 | 15.8388 | 14.6684 | 0.2456  |
| CEU | TBC1D3 | 36178639 | 13.7937 | 13.3039 | 0.1127  |
| CEU | TBC1D3 | 36183639 | 10.0839 | 12.7922 | -0.647  |
| CEU | TBC1D3 | 36188639 | 6.5032  | 11.2571 | -1.281  |
| CEU | TBC1D3 | 36193639 | 8.4059  | 10.2337 | -0.5385 |
| CEU | TBC1D3 | 36198639 | 7.8367  | 7.8459  | -0.0035 |
| CEU | TBC1D3 | 36203639 | 5.6265  | 7.1636  | -0.6292 |
| CEU | TBC1D3 | 36208639 | 7.725   | 8.8692  | -0.385  |

## 2\_TajimasD\_data

|     |        |          |         |         |         |
|-----|--------|----------|---------|---------|---------|
| CEU | TBC1D3 | 36213639 | 8.2828  | 8.0164  | 0.0984  |
| CEU | TBC1D3 | 36218639 | 9.026   | 8.5281  | 0.1737  |
| CEU | TBC1D3 | 36223639 | 11.9023 | 9.8926  | 0.6111  |
| CEU | TBC1D3 | 36228639 | 10.7856 | 10.2337 | 0.1626  |
| CEU | TBC1D3 | 36233639 | 9.0241  | 9.8926  | -0.2641 |
| CEU | TBC1D3 | 36238639 | 7.7669  | 8.0164  | -0.0922 |
| CEU | TBC1D3 | 36243639 | 8.8982  | 8.5281  | 0.1291  |
| CEU | TBC1D3 | 36248639 | 10.0107 | 8.5281  | 0.5173  |
| CEU | TBC1D3 | 36253639 | 4.894   | 3.9229  | 0.6773  |
| CEU | TBC1D3 | 36258639 | 2.5399  | 2.2173  | 0.3604  |
| CEU | TBC1D3 | 36263639 | 2.7654  | 2.0467  | 0.8552  |
| CEU | TBC1D3 | 36268639 | 1.9021  | 1.5351  | 0.5442  |
| CEU | TBC1D3 | 36273639 | 2.7168  | 2.729   | -0.0115 |
| CEU | TBC1D3 | 36278639 | 3.3263  | 3.0701  | 0.2198  |
| CEU | TBC1D3 | 36283639 | 1.7901  | 1.7056  | 0.1157  |
| CEU | TBC1D3 | 36288639 | 0.5143  | 0.8528  | -0.7623 |
| CEU | TBC1D3 | 36293639 | 2.2533  | 1.8762  | 0.4801  |
| CEU | TBC1D3 | 36298639 | 3.2606  | 2.3879  | 0.919   |
| CEU | TBC1D3 | 36303639 | 2.6141  | 2.2173  | 0.4433  |
| CEU | TBC1D3 | 36308639 | 3.1008  | 2.729   | 0.3514  |
| CEU | TBC1D3 | 36313639 | 2.5432  | 3.5818  | -0.7828 |
| CEU | TBC1D3 | 36318639 | 1.0724  | 2.5584  | -1.4803 |
| CEU | TBC1D3 | 36323639 | 1.0262  | 0.8528  | 0.3905  |
| CEU | TBC1D3 | 36328639 | 0.7471  | 0.8528  | -0.238  |
| CEU | TBC1D3 | 36333639 | 0.2482  | 0.6822  | -1.1333 |
| CEU | TBC1D3 | 36338639 | 0.1849  | 0.3411  | -0.6262 |
| CEU | TBC1D3 | 36343639 | 0.1748  | 0.1706  | 0.0249  |
| CEU | TBC1D3 | 36348639 | 1.849   | 1.3645  | 0.7838  |
| CEU | TBC1D3 | 36353639 | 3.4101  | 3.2407  | 0.1389  |
| CEU | TBC1D3 | 36358639 | 3.3558  | 4.9463  | -0.9071 |
| CEU | TBC1D3 | 36363639 | 3.664   | 5.2874  | -0.8729 |
| CEU | TBC1D3 | 36368639 | 3.5236  | 4.9463  | -0.8114 |
| CEU | TBC1D3 | 36373639 | 3.6881  | 5.6286  | -0.9871 |
| CEU | TBC1D3 | 36378639 | 3.8922  | 3.9229  | -0.0214 |
| CEU | TBC1D3 | 36383639 | 2.9532  | 3.0701  | -0.1003 |
| CEU | TBC1D3 | 36388639 | 2.5222  | 4.2641  | -1.1307 |
| CEU | TBC1D3 | 36393639 | 4.6982  | 5.9697  | -0.6136 |
| CEU | TBC1D3 | 36398639 | 5.2896  | 4.7757  | 0.3022  |
| CEU | TBC1D3 | 36403639 | 3.4162  | 3.4112  | 0.0039  |
| CEU | TBC1D3 | 36408639 | 2.9889  | 6.4814  | -1.5654 |
| CEU | TBC1D3 | 36413639 | 3.2321  | 7.3342  | -1.6436 |
| CEU | TBC1D3 | 36418639 | 3.5834  | 6.8225  | -1.386  |
| CEU | TBC1D3 | 36423639 | 2.8369  | 5.7991  | -1.4672 |
| CEU | TBC1D3 | 36428639 | 2.0645  | 4.2641  | -1.4279 |
| CEU | TBC1D3 | 36433639 | 4.2185  | 6.8225  | -1.1142 |
| CEU | TBC1D3 | 36438639 | 4.9392  | 8.187   | -1.1766 |
| CEU | TBC1D3 | 36443639 | 4.7151  | 8.187   | -1.2578 |
| CEU | TBC1D3 | 36448639 | 4.7141  | 7.1636  | -1.0027 |
| CEU | TBC1D3 | 36453639 | 3.1993  | 4.9463  | -0.9963 |

## 2\_TajimasD\_data

|     |        |          |         |         |         |
|-----|--------|----------|---------|---------|---------|
| CEU | TBC1D3 | 36458639 | 1.9971  | 4.7757  | -1.6342 |
| CEU | TBC1D3 | 36463639 | 2.0379  | 4.6052  | -1.5587 |
| CEU | TBC1D3 | 36468639 | 2.2257  | 5.1169  | -1.6003 |
| CEU | TBC1D3 | 36473639 | 2.5244  | 6.3108  | -1.7384 |
| CEU | TBC1D3 | 36478639 | 2.1742  | 6.1402  | -1.8663 |
| CEU | TBC1D3 | 36483639 | 1.6638  | 6.3108  | -2.1335 |
| CEU | TBC1D3 | 36488639 | 2.9145  | 8.0164  | -1.8844 |
| CEU | TBC1D3 | 36493639 | 4.0192  | 6.9931  | -1.2443 |
| CEU | TBC1D3 | 36498639 | 3.7582  | 5.9697  | -1.0673 |
| CEU | TBC1D3 | 36503639 | 3.6605  | 5.9697  | -1.1145 |
| CEU | TBC1D3 | 36508639 | 3.5294  | 5.9697  | -1.1777 |
| CEU | TBC1D3 | 36513639 | 3.2562  | 6.9931  | -1.5636 |
| CEU | TBC1D3 | 36518639 | 3.0752  | 5.458   | -1.2457 |
| CEU | TBC1D3 | 36523639 | 3.2505  | 5.1169  | -1.0331 |
| CEU | TBC1D3 | 36528639 | 4.4319  | 6.9931  | -1.0717 |
| CEU | TBC1D3 | 36533639 | 5.1688  | 8.0164  | -1.0518 |
| CEU | TBC1D3 | 36538639 | 4.9095  | 7.3342  | -0.9715 |
| CEU | TBC1D3 | 36543639 | 8.0637  | 8.3576  | -0.1045 |
| CEU | TBC1D3 | 36548639 | 7.3166  | 8.3576  | -0.37   |
| CEU | TBC1D3 | 36553639 | 2.8303  | 5.7991  | -1.4704 |
| CEU | TBC1D3 | 36558639 | 2.6834  | 5.6286  | -1.4981 |
| CEU | TBC1D3 | 36563639 | 4.9582  | 8.0164  | -1.1296 |
| CEU | TBC1D3 | 36568639 | 8.9002  | 10.5749 | -0.4785 |
| CEU | TBC1D3 | 36573639 | 11.1156 | 10.0632 | 0.3149  |
| CEU | TBC1D3 | 36578639 | 12.3028 | 9.7221  | 0.7975  |
| CEU | TBC1D3 | 36583639 | 10.3001 | 9.0398  | 0.4167  |
| CEU | TBC1D3 | 36588639 | 9.2804  | 9.0398  | 0.0795  |
| CEU | TBC1D3 | 36593639 | 13.1495 | 10.5749 | 0.7356  |
| CEU | TBC1D3 | 36598639 | 12.7126 | 11.2571 | 0.3922  |
| CEU | TBC1D3 | 36603639 | 9.121   | 10.5749 | -0.4154 |
| CEU | TBC1D3 | 36608639 | 11.4383 | 11.2571 | 0.0488  |
| CEU | TBC1D3 | 36613639 | 12.0454 | 9.8926  | 0.6546  |
| CEU | TBC1D3 | 36618639 | 8.5568  | 7.8459  | 0.2678  |
| CEU | TBC1D3 | 36623639 | 8.0752  | 7.8459  | 0.0864  |
| CEU | TBC1D3 | 36628639 | 8.7403  | 8.5281  | 0.074   |
| CEU | TBC1D3 | 36633639 | 11.6185 | 12.1099 | -0.1236 |
| CEU | TBC1D3 | 36638639 | 12.6383 | 12.4511 | 0.0459  |
| CEU | TBC1D3 | 36643639 | 10.4719 | 8.8692  | 0.5393  |
| CEU | TBC1D3 | 36648639 | 11.6071 | 9.0398  | 0.8488  |
| CEU | TBC1D3 | 36653639 | 11.2402 | 11.4277 | -0.0498 |
| CEU | TBC1D3 | 36658639 | 10.5339 | 9.8926  | 0.195   |
| CEU | TBC1D3 | 36663639 | 6.9573  | 6.4814  | 0.2133  |
| CEU | TBC1D3 | 36668639 | 6.3373  | 7.1636  | -0.3382 |
| CEU | TBC1D3 | 36673639 | 9.1206  | 9.3809  | -0.0832 |
| CEU | TBC1D3 | 36678639 | 11.3554 | 11.5982 | -0.0636 |
| CEU | TBC1D3 | 36683639 | 10.7354 | 11.2571 | -0.1406 |
| CEU | TBC1D3 | 36688639 | 6.2333  | 9.5515  | -1.0424 |
| CEU | TBC1D3 | 36693639 | 5.7529  | 10.2337 | -1.3201 |
| CEU | TBC1D3 | 36698639 | 5.2524  | 8.8692  | -1.2171 |

## 2\_TajimasD\_data

|     |        |          |         |        |         |
|-----|--------|----------|---------|--------|---------|
| CEU | TBC1D3 | 36703639 | 4.6673  | 8.0164 | -1.237  |
| CEU | TBC1D3 | 36708639 | 3.7318  | 8.0164 | -1.5825 |
| CEU | TBC1D3 | 36713639 | 2.912   | 7.1636 | -1.7404 |
| CEU | TBC1D3 | 36718639 | 4.0231  | 6.8225 | -1.1979 |
| CEU | TBC1D3 | 36723639 | 4.9347  | 7.6753 | -1.0534 |
| CEU | TBC1D3 | 36728639 | 4.0385  | 7.6753 | -1.3979 |
| CEU | TBC1D3 | 36733639 | 4.1789  | 7.5047 | -1.3049 |
| CEU | TBC1D3 | 36738639 | 5.0262  | 7.1636 | -0.8749 |
| CEU | TBC1D3 | 36743639 | 6.1901  | 7.1636 | -0.3985 |
| CEU | TBC1D3 | 36748639 | 4.7502  | 7.8459 | -1.1662 |
| CEU | TBC1D3 | 36753639 | 2.0944  | 6.1402 | -1.9038 |
| CEU | TBC1D3 | 36758639 | 2.3616  | 5.1169 | -1.5251 |
| CHB | TBC1D3 | 35758639 | 8.2104  | 8.4708 | -0.0912 |
| CHB | TBC1D3 | 35763639 | 10.2328 | 9.3178 | 0.2933  |
| CHB | TBC1D3 | 35768639 | 10.3958 | 9.4872 | 0.2864  |
| CHB | TBC1D3 | 35773639 | 10.5852 | 9.4872 | 0.3461  |
| CHB | TBC1D3 | 35778639 | 8.6509  | 8.979  | -0.1088 |
| CHB | TBC1D3 | 35783639 | 7.0369  | 7.7931 | -0.2858 |
| CHB | TBC1D3 | 35788639 | 9.0666  | 7.4543 | 0.6346  |
| CHB | TBC1D3 | 35793639 | 13.3084 | 9.6567 | 1.1323  |
| CHB | TBC1D3 | 35798639 | 10.5688 | 8.979  | 0.5274  |
| CHB | TBC1D3 | 35803639 | 7.3764  | 8.1319 | -0.2746 |
| CHB | TBC1D3 | 35808639 | 8.2233  | 7.4543 | 0.3027  |
| CHB | TBC1D3 | 35813639 | 10.6347 | 7.9625 | 0.9902  |
| CHB | TBC1D3 | 35818639 | 10.012  | 8.1319 | 0.6834  |
| CHB | TBC1D3 | 35823639 | 6.589   | 7.7931 | -0.4551 |
| CHB | TBC1D3 | 35828639 | 6.9343  | 8.3013 | -0.4875 |
| CHB | TBC1D3 | 35833639 | 4.9682  | 6.6072 | -0.7199 |
| CHB | TBC1D3 | 35838639 | 3.7306  | 5.0825 | -0.7505 |
| CHB | TBC1D3 | 35843639 | 3.9703  | 5.5907 | -0.8268 |
| CHB | TBC1D3 | 35848639 | 5.5926  | 7.7931 | -0.8317 |
| CHB | TBC1D3 | 35853639 | 6.2894  | 7.7931 | -0.5683 |
| CHB | TBC1D3 | 35858639 | 7.376   | 7.6237 | -0.0955 |
| CHB | TBC1D3 | 35863639 | 8.3653  | 8.4708 | -0.0369 |
| CHB | TBC1D3 | 35868639 | 7.2732  | 8.6402 | -0.4699 |
| CHB | TBC1D3 | 35873639 | 7.5926  | 8.4708 | -0.3074 |
| CHB | TBC1D3 | 35878639 | 6.8496  | 7.4543 | -0.238  |
| CHB | TBC1D3 | 35883639 | 6.7183  | 9.1484 | -0.7923 |
| CHB | TBC1D3 | 35888639 | 7.9061  | 9.4872 | -0.4984 |
| CHB | TBC1D3 | 35893639 | 8.9979  | 7.2848 | 0.6886  |
| CHB | TBC1D3 | 35898639 | 7.4877  | 7.1154 | 0.1529  |
| CHB | TBC1D3 | 35903639 | 4.0272  | 6.2684 | -1.0322 |
| CHB | TBC1D3 | 35908639 | 2.4847  | 5.5907 | -1.5847 |
| CHB | TBC1D3 | 35913639 | 2.1978  | 4.4048 | -1.3888 |
| CHB | TBC1D3 | 35918639 | 2.9526  | 4.5742 | -0.9874 |
| CHB | TBC1D3 | 35923639 | 3.9109  | 5.2519 | -0.7232 |
| CHB | TBC1D3 | 35928639 | 4.0939  | 5.9295 | -0.8886 |
| CHB | TBC1D3 | 35933639 | 3.8241  | 7.1154 | -1.3516 |
| CHB | TBC1D3 | 35938639 | 2.5871  | 5.5907 | -1.5325 |

## 2\_TajimasD\_data

|     |        |          |         |         |         |
|-----|--------|----------|---------|---------|---------|
| CHB | TBC1D3 | 35943639 | 2.4512  | 5.2519  | -1.5105 |
| CHB | TBC1D3 | 35948639 | 4.7537  | 6.0989  | -0.635  |
| CHB | TBC1D3 | 35953639 | 6.0198  | 6.2684  | -0.1145 |
| CHB | TBC1D3 | 35958639 | 5.2819  | 6.2684  | -0.4543 |
| CHB | TBC1D3 | 35963639 | 4.8599  | 7.4543  | -1.0212 |
| CHB | TBC1D3 | 35968639 | 7.2665  | 9.1484  | -0.6136 |
| CHB | TBC1D3 | 35973639 | 5.9425  | 6.6072  | -0.2919 |
| CHB | TBC1D3 | 35978639 | 2.9071  | 4.913   | -1.1474 |
| CHB | TBC1D3 | 35983639 | 4.8637  | 6.4378  | -0.7078 |
| CHB | TBC1D3 | 35988639 | 6.1365  | 6.946   | -0.3398 |
| CHB | TBC1D3 | 35993639 | 6.1797  | 6.6072  | -0.1878 |
| CHB | TBC1D3 | 35998639 | 7.9372  | 7.4543  | 0.1901  |
| CHB | TBC1D3 | 36003639 | 6.8995  | 7.2848  | -0.1549 |
| CHB | TBC1D3 | 36008639 | 2.8294  | 5.0825  | -1.2509 |
| CHB | TBC1D3 | 36013639 | 3.6429  | 4.5742  | -0.5671 |
| CHB | TBC1D3 | 36018639 | 5.5711  | 6.7766  | -0.5175 |
| CHB | TBC1D3 | 36023639 | 6.6762  | 7.9625  | -0.4767 |
| CHB | TBC1D3 | 36028639 | 9.7796  | 9.1484  | 0.2058  |
| CHB | TBC1D3 | 36033639 | 8.6349  | 8.8096  | -0.059  |
| CHB | TBC1D3 | 36038639 | 5.4904  | 7.6237  | -0.8227 |
| CHB | TBC1D3 | 36043639 | 8.0409  | 9.6567  | -0.501  |
| CHB | TBC1D3 | 36048639 | 9.9516  | 10.8426 | -0.248  |
| CHB | TBC1D3 | 36053639 | 10.1118 | 11.5202 | -0.3703 |
| CHB | TBC1D3 | 36058639 | 14.0712 | 11.5202 | 0.6707  |
| CHB | TBC1D3 | 36063639 | 12.1927 | 9.8261  | 0.7221  |
| CHB | TBC1D3 | 36068639 | 4.6327  | 8.6402  | -1.3775 |
| CHB | TBC1D3 | 36073639 | 4.7136  | 10.1649 | -1.6115 |
| CHB | TBC1D3 | 36078639 | 8.1803  | 9.6567  | -0.4578 |
| CHB | TBC1D3 | 36083639 | 10.1639 | 11.3508 | -0.3164 |
| CHB | TBC1D3 | 36088639 | 8.7464  | 11.012  | -0.6214 |
| CHB | TBC1D3 | 36093639 | 6.5591  | 6.7766  | -0.0934 |
| CHB | TBC1D3 | 36098639 | 9.1786  | 7.2848  | 0.7612  |
| CHB | TBC1D3 | 36103639 | 8.8568  | 8.4708  | 0.1351  |
| CHB | TBC1D3 | 36108639 | 4.0742  | 7.4543  | -1.3305 |
| CHB | TBC1D3 | 36113639 | 4.7599  | 8.6402  | -1.3338 |
| CHB | TBC1D3 | 36118639 | 11.0623 | 9.9955  | 0.3203  |
| CHB | TBC1D3 | 36123639 | 12.4961 | 8.8096  | 1.2447  |
| CHB | TBC1D3 | 36128639 | 7.2248  | 9.3178  | -0.6709 |
| CHB | TBC1D3 | 36133639 | 4.6799  | 9.8261  | -1.5701 |
| CHB | TBC1D3 | 36138639 | 8.0292  | 11.1814 | -0.8523 |
| CHB | TBC1D3 | 36143639 | 7.8995  | 10.3343 | -0.7087 |
| CHB | TBC1D3 | 36148639 | 5.1953  | 7.9625  | -1.0254 |
| CHB | TBC1D3 | 36153639 | 6.5713  | 8.3013  | -0.617  |
| CHB | TBC1D3 | 36158639 | 6.3328  | 7.4543  | -0.4415 |
| CHB | TBC1D3 | 36163639 | 9.96    | 9.9955  | -0.0107 |
| CHB | TBC1D3 | 36168639 | 13.5336 | 13.2144 | 0.0737  |
| CHB | TBC1D3 | 36173639 | 11.9842 | 12.5367 | -0.1341 |
| CHB | TBC1D3 | 36178639 | 10.2328 | 11.8591 | -0.4161 |
| CHB | TBC1D3 | 36183639 | 5.3029  | 9.8261  | -1.38   |

## 2\_TajimasD\_data

|     |        |          |         |         |         |
|-----|--------|----------|---------|---------|---------|
| CHB | TBC1D3 | 36188639 | 2.8277  | 8.4708  | -1.9755 |
| CHB | TBC1D3 | 36193639 | 4.8186  | 9.4872  | -1.4716 |
| CHB | TBC1D3 | 36198639 | 4.7754  | 7.7931  | -1.1405 |
| CHB | TBC1D3 | 36203639 | 5.2956  | 8.4708  | -1.1115 |
| CHB | TBC1D3 | 36208639 | 9.3663  | 12.0285 | -0.6721 |
| CHB | TBC1D3 | 36213639 | 9.1727  | 12.3673 | -0.7856 |
| CHB | TBC1D3 | 36218639 | 9.8664  | 11.5202 | -0.4348 |
| CHB | TBC1D3 | 36223639 | 14.2134 | 12.1979 | 0.5021  |
| CHB | TBC1D3 | 36228639 | 12.1108 | 10.8426 | 0.3529  |
| CHB | TBC1D3 | 36233639 | 9.1532  | 7.7931  | 0.514   |
| CHB | TBC1D3 | 36238639 | 8.3206  | 6.7766  | 0.6628  |
| CHB | TBC1D3 | 36243639 | 10.0552 | 8.6402  | 0.4864  |
| CHB | TBC1D3 | 36248639 | 11.3215 | 9.1484  | 0.7085  |
| CHB | TBC1D3 | 36253639 | 5.1199  | 4.5742  | 0.3323  |
| CHB | TBC1D3 | 36258639 | 1.2559  | 2.7106  | -1.3784 |
| CHB | TBC1D3 | 36263639 | 1.3238  | 2.2024  | -0.9838 |
| CHB | TBC1D3 | 36268639 | 1.3111  | 2.5412  | -1.2283 |
| CHB | TBC1D3 | 36273639 | 2.727   | 3.2189  | -0.4044 |
| CHB | TBC1D3 | 36278639 | 3.1098  | 2.3718  | 0.779   |
| CHB | TBC1D3 | 36283639 | 1.4645  | 1.5247  | -0.0894 |
| CHB | TBC1D3 | 36288639 | 0.5104  | 1.1859  | -1.2058 |
| CHB | TBC1D3 | 36293639 | 2.1997  | 2.3718  | -0.1817 |
| CHB | TBC1D3 | 36298639 | 3.6806  | 2.3718  | 1.3815  |
| CHB | TBC1D3 | 36303639 | 2.9301  | 1.8636  | 1.3607  |
| CHB | TBC1D3 | 36308639 | 3.0426  | 2.7106  | 0.3146  |
| CHB | TBC1D3 | 36313639 | 2.5403  | 2.5412  | -0.0009 |
| CHB | TBC1D3 | 36318639 | 0.8673  | 1.1859  | -0.5687 |
| CHB | TBC1D3 | 36323639 | 0.5233  | 0.8471  | -0.7302 |
| CHB | TBC1D3 | 36328639 | 0.1795  | 1.0165  | -1.6657 |
| CHB | TBC1D3 | 36333639 | 0.459   | 0.6777  | -0.5717 |
| CHB | TBC1D3 | 36338639 | 0.4953  | 0.3388  | 0.6278  |
| CHB | TBC1D3 | 36343639 | 0.0752  | 0.1694  | -0.5598 |
| CHB | TBC1D3 | 36348639 | 1.5109  | 1.0165  | 0.9839  |
| CHB | TBC1D3 | 36353639 | 2.6958  | 2.7106  | -0.014  |
| CHB | TBC1D3 | 36358639 | 2.6543  | 3.8965  | -0.8688 |
| CHB | TBC1D3 | 36363639 | 2.9558  | 4.4048  | -0.9118 |
| CHB | TBC1D3 | 36368639 | 3.3157  | 4.066   | -0.506  |
| CHB | TBC1D3 | 36373639 | 4.7877  | 4.4048  | 0.2409  |
| CHB | TBC1D3 | 36378639 | 4.7699  | 4.2354  | 0.348   |
| CHB | TBC1D3 | 36383639 | 2.8534  | 3.8965  | -0.7296 |
| CHB | TBC1D3 | 36388639 | 2.1256  | 4.4048  | -1.4342 |
| CHB | TBC1D3 | 36393639 | 3.6884  | 6.2684  | -1.1883 |
| CHB | TBC1D3 | 36398639 | 4.5669  | 5.7601  | -0.5928 |
| CHB | TBC1D3 | 36403639 | 2.7889  | 4.7436  | -1.153  |
| CHB | TBC1D3 | 36408639 | 1.2555  | 6.4378  | -2.3301 |
| CHB | TBC1D3 | 36413639 | 1.34    | 6.6072  | -2.3134 |
| CHB | TBC1D3 | 36418639 | 1.5123  | 5.2519  | -2.0169 |
| CHB | TBC1D3 | 36423639 | 0.9737  | 5.4213  | -2.3322 |
| CHB | TBC1D3 | 36428639 | 0.6703  | 6.0989  | -2.5625 |

## 2\_TajimasD\_data

|     |        |          |         |         |         |
|-----|--------|----------|---------|---------|---------|
| CHB | TBC1D3 | 36433639 | 1.4413  | 6.6072  | -2.2689 |
| CHB | TBC1D3 | 36438639 | 1.5591  | 8.3013  | -2.4046 |
| CHB | TBC1D3 | 36443639 | 1.0453  | 9.4872  | -2.6611 |
| CHB | TBC1D3 | 36448639 | 1.4999  | 10.1649 | -2.5615 |
| CHB | TBC1D3 | 36453639 | 1.2479  | 8.6402  | -2.541  |
| CHB | TBC1D3 | 36458639 | 0.653   | 5.7601  | -2.5373 |
| CHB | TBC1D3 | 36463639 | 2.4418  | 6.7766  | -1.8608 |
| CHB | TBC1D3 | 36468639 | 3.3746  | 9.1484  | -1.8825 |
| CHB | TBC1D3 | 36473639 | 3.8355  | 9.1484  | -1.7322 |
| CHB | TBC1D3 | 36478639 | 3.3583  | 7.9625  | -1.7062 |
| CHB | TBC1D3 | 36483639 | 1.3638  | 6.7766  | -2.3235 |
| CHB | TBC1D3 | 36488639 | 2.8456  | 7.1154  | -1.7535 |
| CHB | TBC1D3 | 36493639 | 3.7877  | 6.946   | -1.3257 |
| CHB | TBC1D3 | 36498639 | 2.4213  | 6.946   | -1.8993 |
| CHB | TBC1D3 | 36503639 | 2.7971  | 7.4543  | -1.8332 |
| CHB | TBC1D3 | 36508639 | 3.2134  | 5.0825  | -1.0377 |
| CHB | TBC1D3 | 36513639 | 3.5492  | 4.4048  | -0.5384 |
| CHB | TBC1D3 | 36518639 | 3.9625  | 5.5907  | -0.8307 |
| CHB | TBC1D3 | 36523639 | 4.4102  | 5.7601  | -0.6707 |
| CHB | TBC1D3 | 36528639 | 6.1831  | 6.7766  | -0.2548 |
| CHB | TBC1D3 | 36533639 | 7.522   | 8.8096  | -0.4347 |
| CHB | TBC1D3 | 36538639 | 6.4877  | 8.3013  | -0.6468 |
| CHB | TBC1D3 | 36543639 | 9.5702  | 10.1649 | -0.1758 |
| CHB | TBC1D3 | 36548639 | 9.1175  | 11.1814 | -0.5581 |
| CHB | TBC1D3 | 36553639 | 4.173   | 7.4543  | -1.2916 |
| CHB | TBC1D3 | 36558639 | 4.206   | 6.6072  | -1.0546 |
| CHB | TBC1D3 | 36563639 | 8.0154  | 8.3013  | -0.102  |
| CHB | TBC1D3 | 36568639 | 10.8784 | 11.012  | -0.0366 |
| CHB | TBC1D3 | 36573639 | 11.4078 | 11.5202 | -0.0296 |
| CHB | TBC1D3 | 36578639 | 13.4988 | 10.5037 | 0.8587  |
| CHB | TBC1D3 | 36583639 | 9.9617  | 8.8096  | 0.389   |
| CHB | TBC1D3 | 36588639 | 7.894   | 9.3178  | -0.4564 |
| CHB | TBC1D3 | 36593639 | 11.952  | 10.6731 | 0.3612  |
| CHB | TBC1D3 | 36598639 | 10.4847 | 11.012  | -0.1446 |
| CHB | TBC1D3 | 36603639 | 6.3933  | 10.1649 | -1.1149 |
| CHB | TBC1D3 | 36608639 | 8.8115  | 9.4872  | -0.213  |
| CHB | TBC1D3 | 36613639 | 10.403  | 8.979   | 0.4724  |
| CHB | TBC1D3 | 36618639 | 6.3267  | 8.8096  | -0.8383 |
| CHB | TBC1D3 | 36623639 | 5.8184  | 9.1484  | -1.0857 |
| CHB | TBC1D3 | 36628639 | 8.7318  | 8.8096  | -0.0263 |
| CHB | TBC1D3 | 36633639 | 11.5268 | 9.8261  | 0.5189  |
| CHB | TBC1D3 | 36638639 | 11.7075 | 9.1484  | 0.8344  |
| CHB | TBC1D3 | 36643639 | 7.8869  | 7.9625  | -0.028  |
| CHB | TBC1D3 | 36648639 | 7.3288  | 9.8261  | -0.7619 |
| CHB | TBC1D3 | 36653639 | 8.9484  | 10.8426 | -0.5272 |
| CHB | TBC1D3 | 36658639 | 9.0996  | 9.1484  | -0.0159 |
| CHB | TBC1D3 | 36663639 | 5.2966  | 7.7931  | -0.9435 |
| CHB | TBC1D3 | 36668639 | 4.9659  | 9.4872  | -1.4252 |
| CHB | TBC1D3 | 36673639 | 7.3132  | 10.6731 | -0.949  |



## 2\_TajimasD\_data

|     |        |          |         |         |         |
|-----|--------|----------|---------|---------|---------|
| CHB | TBC1D3 | 36678639 | 8.3503  | 11.5202 | -0.8334 |
| CHB | TBC1D3 | 36683639 | 6.815   | 11.012  | -1.1512 |
| CHB | TBC1D3 | 36688639 | 4.9848  | 10.3343 | -1.5572 |
| CHB | TBC1D3 | 36693639 | 6.0257  | 10.6731 | -1.3126 |
| CHB | TBC1D3 | 36698639 | 4.7653  | 8.979   | -1.3978 |
| CHB | TBC1D3 | 36703639 | 3.8209  | 7.7931  | -1.5013 |
| CHB | TBC1D3 | 36708639 | 3.1626  | 7.6237  | -1.7203 |
| CHB | TBC1D3 | 36713639 | 2.5195  | 6.2684  | -1.7266 |
| CHB | TBC1D3 | 36718639 | 3.3486  | 6.0989  | -1.2983 |
| CHB | TBC1D3 | 36723639 | 3.9838  | 6.946   | -1.2434 |
| CHB | TBC1D3 | 36728639 | 3.3863  | 5.9295  | -1.2312 |
| CHB | TBC1D3 | 36733639 | 3.3765  | 6.6072  | -1.419  |
| CHB | TBC1D3 | 36738639 | 4.1494  | 8.1319  | -1.4475 |
| CHB | TBC1D3 | 36743639 | 5.7135  | 8.3013  | -0.9229 |
| CHB | TBC1D3 | 36748639 | 4.7721  | 8.3013  | -1.2587 |
| CHB | TBC1D3 | 36753639 | 2.8011  | 6.946   | -1.7399 |
| CHB | TBC1D3 | 36758639 | 2.5269  | 5.0825  | -1.4188 |
| YRI | TBC1D3 | 35758639 | 8.7483  | 13.613  | -1.0888 |
| YRI | TBC1D3 | 35763639 | 11.191  | 14.7895 | -0.7444 |
| YRI | TBC1D3 | 35768639 | 10.6468 | 13.2769 | -0.6028 |
| YRI | TBC1D3 | 35773639 | 9.3796  | 13.2769 | -0.8932 |
| YRI | TBC1D3 | 35778639 | 10.0652 | 15.2937 | -1.0476 |
| YRI | TBC1D3 | 35783639 | 10.4136 | 13.1089 | -0.6252 |
| YRI | TBC1D3 | 35788639 | 9.5635  | 10.5879 | -0.2905 |
| YRI | TBC1D3 | 35793639 | 11.6314 | 13.9492 | -0.5069 |
| YRI | TBC1D3 | 35798639 | 10.4448 | 13.613  | -0.7091 |
| YRI | TBC1D3 | 35803639 | 9.3752  | 13.613  | -0.9485 |
| YRI | TBC1D3 | 35808639 | 10.2267 | 12.7727 | -0.6053 |
| YRI | TBC1D3 | 35813639 | 13.2754 | 14.1172 | -0.182  |
| YRI | TBC1D3 | 35818639 | 13.1297 | 15.1256 | -0.4042 |
| YRI | TBC1D3 | 35823639 | 9.0464  | 11.7644 | -0.6983 |
| YRI | TBC1D3 | 35828639 | 10.1719 | 13.1089 | -0.6813 |
| YRI | TBC1D3 | 35833639 | 8.2014  | 12.9408 | -1.1129 |
| YRI | TBC1D3 | 35838639 | 6.6702  | 10.756  | -1.1418 |
| YRI | TBC1D3 | 35843639 | 8.0465  | 9.7476  | -0.5211 |
| YRI | TBC1D3 | 35848639 | 8.5408  | 10.2518 | -0.5001 |
| YRI | TBC1D3 | 35853639 | 8.5754  | 12.4366 | -0.9414 |
| YRI | TBC1D3 | 35858639 | 8.7191  | 13.1089 | -1.0183 |
| YRI | TBC1D3 | 35863639 | 8.5125  | 12.2685 | -0.9275 |
| YRI | TBC1D3 | 35868639 | 8.3075  | 12.4366 | -1.0067 |
| YRI | TBC1D3 | 35873639 | 10.0353 | 14.2853 | -0.9087 |
| YRI | TBC1D3 | 35878639 | 8.4608  | 14.4534 | -1.2671 |
| YRI | TBC1D3 | 35883639 | 7.7462  | 14.1172 | -1.3776 |
| YRI | TBC1D3 | 35888639 | 8.1467  | 13.2769 | -1.1758 |
| YRI | TBC1D3 | 35893639 | 7.0578  | 11.9324 | -1.2357 |
| YRI | TBC1D3 | 35898639 | 7.3178  | 12.4366 | -1.248  |
| YRI | TBC1D3 | 35903639 | 6.5572  | 10.924  | -1.2027 |
| YRI | TBC1D3 | 35908639 | 5.2625  | 9.0754  | -1.2481 |
| YRI | TBC1D3 | 35913639 | 3.9939  | 9.0754  | -1.6634 |

## 2\_TajimasD\_data

|     |        |          |         |         |         |
|-----|--------|----------|---------|---------|---------|
| YRI | TBC1D3 | 35918639 | 4.7504  | 9.9157  | -1.5573 |
| YRI | TBC1D3 | 35923639 | 5.0784  | 10.924  | -1.61   |
| YRI | TBC1D3 | 35928639 | 4.5329  | 11.4282 | -1.8204 |
| YRI | TBC1D3 | 35933639 | 5.7863  | 11.9324 | -1.558  |
| YRI | TBC1D3 | 35938639 | 4.9819  | 10.0837 | -1.5143 |
| YRI | TBC1D3 | 35943639 | 4.733   | 8.5712  | -1.3246 |
| YRI | TBC1D3 | 35948639 | 5.6972  | 9.5795  | -1.2087 |
| YRI | TBC1D3 | 35953639 | 6.394   | 10.756  | -1.2189 |
| YRI | TBC1D3 | 35958639 | 6.5561  | 11.7644 | -1.338  |
| YRI | TBC1D3 | 35963639 | 5.9025  | 11.9324 | -1.5286 |
| YRI | TBC1D3 | 35968639 | 8.7957  | 13.445  | -1.0529 |
| YRI | TBC1D3 | 35973639 | 8.5217  | 11.9324 | -0.8646 |
| YRI | TBC1D3 | 35978639 | 5.3128  | 8.9073  | -1.1972 |
| YRI | TBC1D3 | 35983639 | 5.4598  | 9.2434  | -1.2177 |
| YRI | TBC1D3 | 35988639 | 7.0853  | 10.756  | -1.0258 |
| YRI | TBC1D3 | 35993639 | 8.0682  | 11.4282 | -0.8871 |
| YRI | TBC1D3 | 35998639 | 8.8686  | 12.7727 | -0.9281 |
| YRI | TBC1D3 | 36003639 | 9.5184  | 13.2769 | -0.8614 |
| YRI | TBC1D3 | 36008639 | 5.7491  | 10.0837 | -1.2866 |
| YRI | TBC1D3 | 36013639 | 4.804   | 11.4282 | -1.7488 |
| YRI | TBC1D3 | 36018639 | 7.2427  | 13.2769 | -1.383  |
| YRI | TBC1D3 | 36023639 | 9.2905  | 13.445  | -0.9409 |
| YRI | TBC1D3 | 36028639 | 12.0676 | 14.9575 | -0.5914 |
| YRI | TBC1D3 | 36033639 | 10.5755 | 13.613  | -0.6799 |
| YRI | TBC1D3 | 36038639 | 10.031  | 12.4366 | -0.5865 |
| YRI | TBC1D3 | 36043639 | 14.0675 | 13.613  | 0.1017  |
| YRI | TBC1D3 | 36048639 | 14.8749 | 16.6382 | -0.326  |
| YRI | TBC1D3 | 36053639 | 12.983  | 17.1423 | -0.7473 |
| YRI | TBC1D3 | 36058639 | 15.0999 | 16.302  | -0.2266 |
| YRI | TBC1D3 | 36063639 | 13.0145 | 13.7811 | -0.1696 |
| YRI | TBC1D3 | 36068639 | 6.7865  | 10.924  | -1.1395 |
| YRI | TBC1D3 | 36073639 | 6.3179  | 13.1089 | -1.5753 |
| YRI | TBC1D3 | 36078639 | 7.8969  | 12.9408 | -1.1844 |
| YRI | TBC1D3 | 36083639 | 11.3878 | 14.2853 | -0.6195 |
| YRI | TBC1D3 | 36088639 | 11.2224 | 14.6214 | -0.7108 |
| YRI | TBC1D3 | 36093639 | 8.6322  | 12.2685 | -0.898  |
| YRI | TBC1D3 | 36098639 | 10.6783 | 13.613  | -0.6568 |
| YRI | TBC1D3 | 36103639 | 9.5784  | 14.2853 | -1.0064 |
| YRI | TBC1D3 | 36108639 | 6.4147  | 12.9408 | -1.5324 |
| YRI | TBC1D3 | 36113639 | 8.4701  | 13.613  | -1.1511 |
| YRI | TBC1D3 | 36118639 | 12.7422 | 15.7978 | -0.5936 |
| YRI | TBC1D3 | 36123639 | 15.5422 | 14.9575 | 0.1197  |
| YRI | TBC1D3 | 36128639 | 14.807  | 14.6214 | 0.0388  |
| YRI | TBC1D3 | 36133639 | 11.8512 | 15.9659 | -0.7913 |
| YRI | TBC1D3 | 36138639 | 13.8466 | 16.4701 | -0.4898 |
| YRI | TBC1D3 | 36143639 | 12.863  | 16.6382 | -0.6979 |
| YRI | TBC1D3 | 36148639 | 7.7928  | 15.1256 | -1.4848 |
| YRI | TBC1D3 | 36153639 | 7.9997  | 15.2937 | -1.4615 |
| YRI | TBC1D3 | 36158639 | 10.7577 | 17.6465 | -1.2038 |

## 2\_TajimasD\_data

|     |        |          |         |         |         |
|-----|--------|----------|---------|---------|---------|
| YRI | TBC1D3 | 36163639 | 18.4071 | 17.8146 | 0.1026  |
| YRI | TBC1D3 | 36168639 | 23.3168 | 18.1507 | 0.8787  |
| YRI | TBC1D3 | 36173639 | 22.4873 | 18.3188 | 0.7028  |
| YRI | TBC1D3 | 36178639 | 21.8525 | 16.9743 | 0.8848  |
| YRI | TBC1D3 | 36183639 | 19.4124 | 16.9743 | 0.4422  |
| YRI | TBC1D3 | 36188639 | 13.7092 | 16.6382 | -0.5415 |
| YRI | TBC1D3 | 36193639 | 10.9102 | 15.7978 | -0.9495 |
| YRI | TBC1D3 | 36198639 | 9.8249  | 13.9492 | -0.902  |
| YRI | TBC1D3 | 36203639 | 9.2543  | 17.1423 | -1.4172 |
| YRI | TBC1D3 | 36208639 | 10.9256 | 19.3272 | -1.3453 |
| YRI | TBC1D3 | 36213639 | 9.9634  | 18.1507 | -1.3925 |
| YRI | TBC1D3 | 36218639 | 10.7782 | 17.9827 | -1.2364 |
| YRI | TBC1D3 | 36223639 | 14.2933 | 16.302  | -0.3787 |
| YRI | TBC1D3 | 36228639 | 13.0225 | 15.1256 | -0.4259 |
| YRI | TBC1D3 | 36233639 | 10.5251 | 16.134  | -1.0679 |
| YRI | TBC1D3 | 36238639 | 11.1488 | 17.1423 | -1.0768 |
| YRI | TBC1D3 | 36243639 | 14.5827 | 19.4952 | -0.7801 |
| YRI | TBC1D3 | 36248639 | 13.8182 | 16.9743 | -0.5724 |
| YRI | TBC1D3 | 36253639 | 5.4953  | 7.3947  | -0.7506 |
| YRI | TBC1D3 | 36258639 | 2.7603  | 4.7057  | -1.1516 |
| YRI | TBC1D3 | 36263639 | 2.6494  | 3.5293  | -0.6671 |
| YRI | TBC1D3 | 36268639 | 2.4964  | 4.7057  | -1.3078 |
| YRI | TBC1D3 | 36273639 | 3.6382  | 6.5544  | -1.2857 |
| YRI | TBC1D3 | 36278639 | 2.6765  | 5.0419  | -1.3179 |
| YRI | TBC1D3 | 36283639 | 1.0797  | 2.8571  | -1.6074 |
| YRI | TBC1D3 | 36288639 | 1.012   | 1.1764  | -0.294  |
| YRI | TBC1D3 | 36293639 | 2.5247  | 3.1932  | -0.5513 |
| YRI | TBC1D3 | 36298639 | 4.0133  | 6.0502  | -0.9651 |
| YRI | TBC1D3 | 36303639 | 3.7169  | 5.8822  | -1.0521 |
| YRI | TBC1D3 | 36308639 | 3.2166  | 4.0335  | -0.5527 |
| YRI | TBC1D3 | 36313639 | 2.5933  | 3.6974  | -0.8047 |
| YRI | TBC1D3 | 36318639 | 1.0983  | 2.5209  | -1.4247 |
| YRI | TBC1D3 | 36323639 | 1.8229  | 2.3529  | -0.561  |
| YRI | TBC1D3 | 36328639 | 1.5065  | 2.1848  | -0.7616 |
| YRI | TBC1D3 | 36333639 | 0.5794  | 0.6722  | -0.2429 |
| YRI | TBC1D3 | 36338639 | 0.6426  | 0.3361  | 1.2305  |
| YRI | TBC1D3 | 36343639 | 0.2336  | 0.1681  | 0.3894  |
| YRI | TBC1D3 | 36348639 | 1.8265  | 2.8571  | -0.932  |
| YRI | TBC1D3 | 36353639 | 3.6166  | 4.8738  | -0.7217 |
| YRI | TBC1D3 | 36358639 | 4.2561  | 5.7141  | -0.727  |
| YRI | TBC1D3 | 36363639 | 4.2819  | 6.2183  | -0.8952 |
| YRI | TBC1D3 | 36368639 | 4.0345  | 5.7141  | -0.8375 |
| YRI | TBC1D3 | 36373639 | 5.537   | 6.5544  | -0.4485 |
| YRI | TBC1D3 | 36378639 | 5.0321  | 6.5544  | -0.6711 |
| YRI | TBC1D3 | 36383639 | 3.3074  | 6.2183  | -1.3457 |
| YRI | TBC1D3 | 36388639 | 4.284   | 7.8989  | -1.3448 |
| YRI | TBC1D3 | 36393639 | 6.9491  | 10.924  | -1.0948 |
| YRI | TBC1D3 | 36398639 | 6.6951  | 8.7392  | -0.6929 |
| YRI | TBC1D3 | 36403639 | 5.5839  | 8.235   | -0.9492 |

## 2\_TajimasD\_data

|     |        |          |         |         |         |
|-----|--------|----------|---------|---------|---------|
| YRI | TBC1D3 | 36408639 | 7.7749  | 12.4366 | -1.1365 |
| YRI | TBC1D3 | 36413639 | 8.8569  | 13.1089 | -0.9863 |
| YRI | TBC1D3 | 36418639 | 8.46    | 11.5963 | -0.8167 |
| YRI | TBC1D3 | 36423639 | 8.9206  | 10.4199 | -0.4316 |
| YRI | TBC1D3 | 36428639 | 8.6574  | 10.5879 | -0.5475 |
| YRI | TBC1D3 | 36433639 | 11.4612 | 13.7811 | -0.5132 |
| YRI | TBC1D3 | 36438639 | 14.166  | 13.9492 | 0.0474  |
| YRI | TBC1D3 | 36443639 | 17.025  | 13.1089 | 0.9084  |
| YRI | TBC1D3 | 36448639 | 16.7544 | 16.134  | 0.1181  |
| YRI | TBC1D3 | 36453639 | 12.4918 | 16.302  | -0.7183 |
| YRI | TBC1D3 | 36458639 | 9.5408  | 13.2769 | -0.8563 |
| YRI | TBC1D3 | 36463639 | 8.4774  | 11.9324 | -0.8758 |
| YRI | TBC1D3 | 36468639 | 10.1384 | 15.9659 | -1.1207 |
| YRI | TBC1D3 | 36473639 | 10.8921 | 15.6298 | -0.9298 |
| YRI | TBC1D3 | 36478639 | 9.4293  | 10.924  | -0.4117 |
| YRI | TBC1D3 | 36483639 | 6.8815  | 10.2518 | -0.985  |
| YRI | TBC1D3 | 36488639 | 8.7092  | 11.4282 | -0.7178 |
| YRI | TBC1D3 | 36493639 | 8.4585  | 11.4282 | -0.784  |
| YRI | TBC1D3 | 36498639 | 6.7425  | 12.6047 | -1.4112 |
| YRI | TBC1D3 | 36503639 | 7.8962  | 13.613  | -1.2795 |
| YRI | TBC1D3 | 36508639 | 6.9398  | 11.0921 | -1.1274 |
| YRI | TBC1D3 | 36513639 | 6.8642  | 11.4282 | -1.2049 |
| YRI | TBC1D3 | 36518639 | 6.375   | 11.2602 | -1.3078 |
| YRI | TBC1D3 | 36523639 | 5.8912  | 10.924  | -1.3861 |
| YRI | TBC1D3 | 36528639 | 8.1483  | 11.0921 | -0.7993 |
| YRI | TBC1D3 | 36533639 | 9.7417  | 12.1005 | -0.5901 |
| YRI | TBC1D3 | 36538639 | 8.3795  | 12.7727 | -1.0444 |
| YRI | TBC1D3 | 36543639 | 12.6686 | 16.8062 | -0.7576 |
| YRI | TBC1D3 | 36548639 | 12.5359 | 15.1256 | -0.5244 |
| YRI | TBC1D3 | 36553639 | 6.7332  | 7.8989  | -0.4337 |
| YRI | TBC1D3 | 36558639 | 7.7127  | 10.924  | -0.8845 |
| YRI | TBC1D3 | 36563639 | 12.5376 | 15.4617 | -0.5798 |
| YRI | TBC1D3 | 36568639 | 17.5016 | 18.4868 | -0.1646 |
| YRI | TBC1D3 | 36573639 | 17.8795 | 16.8062 | 0.1965  |
| YRI | TBC1D3 | 36578639 | 16.7985 | 16.4701 | 0.0613  |
| YRI | TBC1D3 | 36583639 | 12.9348 | 17.4785 | -0.8013 |
| YRI | TBC1D3 | 36588639 | 11.7502 | 16.8062 | -0.9258 |
| YRI | TBC1D3 | 36593639 | 13.92   | 19.4952 | -0.8853 |
| YRI | TBC1D3 | 36598639 | 17.6138 | 19.3272 | -0.2744 |
| YRI | TBC1D3 | 36603639 | 18.1717 | 15.4617 | 0.5374  |
| YRI | TBC1D3 | 36608639 | 15.5169 | 15.4617 | 0.0109  |
| YRI | TBC1D3 | 36613639 | 14.9084 | 15.9659 | -0.2034 |
| YRI | TBC1D3 | 36618639 | 13.2369 | 16.134  | -0.5516 |
| YRI | TBC1D3 | 36623639 | 12.0511 | 17.3104 | -0.9361 |
| YRI | TBC1D3 | 36628639 | 10.5312 | 14.7895 | -0.8809 |
| YRI | TBC1D3 | 36633639 | 9.345   | 13.445  | -0.9285 |
| YRI | TBC1D3 | 36638639 | 9.255   | 14.4534 | -1.0992 |
| YRI | TBC1D3 | 36643639 | 11.354  | 17.8146 | -1.1187 |
| YRI | TBC1D3 | 36648639 | 15.3574 | 17.6465 | -0.4    |

## 2\_TajimasD\_data

|     |        |          |         |         |         |
|-----|--------|----------|---------|---------|---------|
| YRI | TBC1D3 | 36653639 | 16.6449 | 13.7811 | 0.6336  |
| YRI | TBC1D3 | 36658639 | 14.1818 | 15.6298 | -0.2842 |
| YRI | TBC1D3 | 36663639 | 8.9049  | 14.1172 | -1.127  |
| YRI | TBC1D3 | 36668639 | 11.349  | 14.1172 | -0.5986 |
| YRI | TBC1D3 | 36673639 | 13.7197 | 16.302  | -0.4868 |
| YRI | TBC1D3 | 36678639 | 13.7747 | 17.1423 | -0.6051 |
| YRI | TBC1D3 | 36683639 | 14.3823 | 18.991  | -0.7505 |
| YRI | TBC1D3 | 36688639 | 12.255  | 16.134  | -0.7386 |
| YRI | TBC1D3 | 36693639 | 12.6936 | 14.6214 | -0.4032 |
| YRI | TBC1D3 | 36698639 | 10.838  | 14.1172 | -0.7091 |
| YRI | TBC1D3 | 36703639 | 8.8821  | 12.9408 | -0.953  |
| YRI | TBC1D3 | 36708639 | 9.9861  | 14.1172 | -0.8933 |
| YRI | TBC1D3 | 36713639 | 8.404   | 12.6047 | -1.0112 |
| YRI | TBC1D3 | 36718639 | 6.0836  | 9.5795  | -1.0884 |
| YRI | TBC1D3 | 36723639 | 7.1541  | 10.0837 | -0.8696 |
| YRI | TBC1D3 | 36728639 | 8.699   | 10.756  | -0.5748 |
| YRI | TBC1D3 | 36733639 | 10.3506 | 11.7644 | -0.3632 |
| YRI | TBC1D3 | 36738639 | 9.8866  | 11.4282 | -0.407  |
| YRI | TBC1D3 | 36743639 | 10.463  | 10.5879 | -0.0354 |
| YRI | TBC1D3 | 36748639 | 10.2883 | 11.2602 | -0.2602 |
| YRI | TBC1D3 | 36753639 | 6.0634  | 10.4199 | -1.2541 |
| YRI | TBC1D3 | 36758639 | 3.8459  | 8.5712  | -1.6307 |
| CEU | TBC1D3 | 35827242 | 9.0451  | 8.6987  | 0.1187  |
| CEU | TBC1D3 | 35832242 | 9.0719  | 8.3576  | 0.2539  |
| CEU | TBC1D3 | 35837242 | 7.9944  | 8.5281  | -0.1862 |
| CEU | TBC1D3 | 35842242 | 7.6213  | 8.6987  | -0.3691 |
| CEU | TBC1D3 | 35847242 | 9.719   | 8.6987  | 0.3495  |
| CEU | TBC1D3 | 35852242 | 9.4154  | 8.3576  | 0.376   |
| CEU | TBC1D3 | 35857242 | 9.5533  | 8.3576  | 0.425   |
| CEU | TBC1D3 | 35862242 | 8.9396  | 7.8459  | 0.412   |
| CEU | TBC1D3 | 35867242 | 8.1004  | 7.5047  | 0.2337  |
| CEU | TBC1D3 | 35872242 | 11.2052 | 8.6987  | 0.8587  |
| CEU | TBC1D3 | 35877242 | 8.1246  | 8.3576  | -0.0828 |
| CEU | TBC1D3 | 35882242 | 6.753   | 8.0164  | -0.4666 |
| CEU | TBC1D3 | 35887242 | 8.1313  | 7.1636  | 0.3961  |
| CEU | TBC1D3 | 35892242 | 7.1511  | 5.9697  | 0.5702  |
| CEU | TBC1D3 | 35897242 | 8.6182  | 7.5047  | 0.4369  |
| CEU | TBC1D3 | 35902242 | 6.175   | 6.3108  | -0.0623 |
| CEU | TBC1D3 | 35907242 | 2.8747  | 4.6052  | -1.0507 |
| CEU | TBC1D3 | 35912242 | 2.5341  | 4.0935  | -1.0486 |
| CEU | TBC1D3 | 35917242 | 3.0851  | 4.7757  | -0.9943 |
| CEU | TBC1D3 | 35922242 | 4.4016  | 5.1169  | -0.3959 |
| CEU | TBC1D3 | 35927242 | 4.7714  | 4.6052  | 0.1009  |
| CEU | TBC1D3 | 35932242 | 4.0946  | 5.6286  | -0.7803 |
| CEU | TBC1D3 | 35937242 | 2.6931  | 5.458   | -1.4454 |
| CEU | TBC1D3 | 35942242 | 3.2212  | 5.1169  | -1.0493 |
| CEU | TBC1D3 | 35947242 | 3.7159  | 5.458   | -0.9107 |
| CEU | TBC1D3 | 35952242 | 5.3428  | 6.6519  | -0.5731 |
| CEU | TBC1D3 | 35957242 | 6.3014  | 6.4814  | -0.0807 |

## 2\_TajimasD\_data

|     |        |          |         |         |         |
|-----|--------|----------|---------|---------|---------|
| CEU | TBC1D3 | 35962242 | 4.5865  | 5.458   | -0.4556 |
| CEU | TBC1D3 | 35967242 | 6.377   | 7.3342  | -0.3835 |
| CEU | TBC1D3 | 35972242 | 5.2612  | 6.1402  | -0.4136 |
| CEU | TBC1D3 | 35977242 | 2.1818  | 3.7524  | -1.1379 |
| CEU | TBC1D3 | 35982242 | 4.1742  | 5.9697  | -0.8665 |
| CEU | TBC1D3 | 35987242 | 5.6801  | 7.3342  | -0.6627 |
| CEU | TBC1D3 | 35992242 | 4.288   | 5.7991  | -0.7484 |
| CEU | TBC1D3 | 35997242 | 4.2424  | 6.1402  | -0.8931 |
| CEU | TBC1D3 | 36002242 | 4.4591  | 6.1402  | -0.7911 |
| CEU | TBC1D3 | 36007242 | 3.7392  | 4.6052  | -0.5258 |
| CEU | TBC1D3 | 36012242 | 2.7584  | 4.2641  | -0.9774 |
| CEU | TBC1D3 | 36017242 | 3.2773  | 4.7757  | -0.8813 |
| CEU | TBC1D3 | 36022242 | 5.4696  | 6.3108  | -0.3862 |
| CEU | TBC1D3 | 36027242 | 7.9631  | 8.8692  | -0.3049 |
| CEU | TBC1D3 | 36032242 | 9.1579  | 9.3809  | -0.0712 |
| CEU | TBC1D3 | 36037242 | 7.4325  | 9.0398  | -0.5314 |
| CEU | TBC1D3 | 36042242 | 7.1154  | 9.7221  | -0.8056 |
| CEU | TBC1D3 | 36047242 | 7.9703  | 9.8926  | -0.5845 |
| CEU | TBC1D3 | 36052242 | 11.0175 | 11.9394 | -0.235  |
| CEU | TBC1D3 | 36057242 | 14.9606 | 12.7922 | 0.518   |
| CEU | TBC1D3 | 36062242 | 12.6203 | 9.5515  | 0.9641  |
| CEU | TBC1D3 | 36067242 | 7.3624  | 6.9931  | 0.1545  |
| CEU | TBC1D3 | 36072242 | 7.4682  | 8.187   | -0.2604 |
| CEU | TBC1D3 | 36077242 | 9.1317  | 8.6987  | 0.1483  |
| CEU | TBC1D3 | 36082242 | 11.3313 | 10.4043 | 0.2689  |
| CEU | TBC1D3 | 36087242 | 10.2841 | 11.0866 | -0.2194 |
| CEU | TBC1D3 | 36092242 | 7.2818  | 7.8459  | -0.2125 |
| CEU | TBC1D3 | 36097242 | 10.4482 | 7.6753  | 1.0658  |
| CEU | TBC1D3 | 36102242 | 11.411  | 8.5281  | 1.0059  |
| CEU | TBC1D3 | 36107242 | 8.2756  | 8.187   | 0.0321  |
| CEU | TBC1D3 | 36112242 | 5.8897  | 9.0398  | -1.0415 |
| CEU | TBC1D3 | 36117242 | 8.7335  | 11.0866 | -0.6432 |
| CEU | TBC1D3 | 36122242 | 13.8334 | 11.9394 | 0.4829  |
| CEU | TBC1D3 | 36127242 | 12.1677 | 11.0866 | 0.2955  |
| CEU | TBC1D3 | 36132242 | 8.2083  | 9.5515  | -0.422  |
| CEU | TBC1D3 | 36137242 | 9.7524  | 9.3809  | 0.1187  |
| CEU | TBC1D3 | 36142242 | 8.9932  | 8.5281  | 0.1623  |
| CEU | TBC1D3 | 36147242 | 5.5135  | 7.8459  | -0.8786 |
| CEU | TBC1D3 | 36152242 | 6.5391  | 8.8692  | -0.7841 |
| CEU | TBC1D3 | 36157242 | 8.3661  | 10.0632 | -0.5079 |
| CEU | TBC1D3 | 36162242 | 12.4667 | 11.0866 | 0.3772  |
| CEU | TBC1D3 | 36167242 | 18.2364 | 15.5212 | 0.5398  |
| CEU | TBC1D3 | 36172242 | 18.0837 | 16.8857 | 0.2197  |
| CEU | TBC1D3 | 36177242 | 14.631  | 12.4511 | 0.5342  |
| CEU | TBC1D3 | 36182242 | 10.5255 | 12.2805 | -0.4357 |
| CEU | TBC1D3 | 36187242 | 5.5562  | 10.916  | -1.4865 |
| CEU | TBC1D3 | 36192242 | 7.4238  | 10.2337 | -0.8278 |
| CEU | TBC1D3 | 36197242 | 9.7984  | 9.3809  | 0.1334  |
| CEU | TBC1D3 | 36202242 | 7.0128  | 8.187   | -0.4254 |

## 2\_TajimasD\_data

|     |        |          |         |         |         |
|-----|--------|----------|---------|---------|---------|
| CEU | TBC1D3 | 36207242 | 6.5914  | 8.5281  | -0.6757 |
| CEU | TBC1D3 | 36212242 | 7.3915  | 7.8459  | -0.1712 |
| CEU | TBC1D3 | 36217242 | 9.6036  | 9.0398  | 0.1864  |
| CEU | TBC1D3 | 36222242 | 10.5265 | 9.2104  | 0.4277  |
| CEU | TBC1D3 | 36227242 | 10.4925 | 9.8926  | 0.1824  |
| CEU | TBC1D3 | 36232242 | 10.368  | 10.2337 | 0.0396  |
| CEU | TBC1D3 | 36237242 | 7.4655  | 8.187   | -0.2614 |
| CEU | TBC1D3 | 36242242 | 9.5568  | 9.0398  | 0.1709  |
| CEU | TBC1D3 | 36247242 | 11.3587 | 9.2104  | 0.6981  |
| CEU | TBC1D3 | 36252242 | 5.4313  | 4.6052  | 0.5016  |
| CEU | TBC1D3 | 36257242 | 2.55    | 2.3879  | 0.1707  |
| CEU | TBC1D3 | 36262242 | 2.7654  | 2.0467  | 0.8552  |
| CEU | TBC1D3 | 36267242 | 1.1198  | 0.6822  | 1.1427  |
| CEU | TBC1D3 | 36272242 | 2.5298  | 2.0467  | 0.5748  |
| CEU | TBC1D3 | 36277242 | 3.952   | 3.5818  | 0.279   |
| CEU | TBC1D3 | 36282242 | 1.967   | 2.2173  | -0.2796 |
| CEU | TBC1D3 | 36287242 | 0.1769  | 0.6822  | -1.3195 |
| CEU | TBC1D3 | 36292242 | 2.1651  | 1.5351  | 0.9342  |
| CEU | TBC1D3 | 36297242 | 3.6772  | 2.729   | 0.8963  |
| CEU | TBC1D3 | 36302242 | 1.7862  | 2.2173  | -0.4816 |
| CEU | TBC1D3 | 36307242 | 2.6955  | 2.3879  | 0.3239  |
| CEU | TBC1D3 | 36312242 | 3.0835  | 3.5818  | -0.3756 |
| CEU | TBC1D3 | 36317242 | 1.545   | 2.8996  | -1.2182 |
| CEU | TBC1D3 | 36322242 | 0.9332  | 1.1939  | -0.4646 |
| CEU | TBC1D3 | 36327242 | 0.7471  | 0.8528  | -0.238  |
| CEU | TBC1D3 | 36332242 | 0.7271  | 0.8528  | -0.2831 |
| CEU | TBC1D3 | 36337242 | 0.0202  | 0.3411  | -1.2864 |
| CEU | TBC1D3 | 36342242 | 0.1748  | 0.1706  | 0.0249  |
| CEU | TBC1D3 | 36347242 | 1.5051  | 1.3645  | 0.2275  |
| CEU | TBC1D3 | 36352242 | 2.5662  | 2.2173  | 0.3898  |
| CEU | TBC1D3 | 36357242 | 3.8342  | 4.2641  | -0.2791 |
| CEU | TBC1D3 | 36362242 | 4.1435  | 5.9697  | -0.8813 |
| CEU | TBC1D3 | 36367242 | 3.0309  | 4.9463  | -1.0924 |
| CEU | TBC1D3 | 36372242 | 3.7458  | 5.2874  | -0.8289 |
| CEU | TBC1D3 | 36377242 | 4.4253  | 4.7757  | -0.2061 |
| CEU | TBC1D3 | 36382242 | 3.2599  | 3.7524  | -0.3568 |
| CEU | TBC1D3 | 36387242 | 1.9505  | 3.7524  | -1.3054 |
| CEU | TBC1D3 | 36392242 | 3.8067  | 4.7757  | -0.5699 |
| CEU | TBC1D3 | 36397242 | 5.368   | 5.1169  | 0.139   |
| CEU | TBC1D3 | 36402242 | 4.2275  | 3.9229  | 0.2124  |
| CEU | TBC1D3 | 36407242 | 3.115   | 5.6286  | -1.2786 |
| CEU | TBC1D3 | 36412242 | 3.0625  | 7.3342  | -1.7115 |
| CEU | TBC1D3 | 36417242 | 3.3777  | 6.6519  | -1.4335 |
| CEU | TBC1D3 | 36422242 | 2.6461  | 5.458   | -1.47   |
| CEU | TBC1D3 | 36427242 | 2.1983  | 4.7757  | -1.5159 |
| CEU | TBC1D3 | 36432242 | 4.1707  | 6.3108  | -0.9826 |
| CEU | TBC1D3 | 36437242 | 4.9625  | 8.0164  | -1.128  |
| CEU | TBC1D3 | 36442242 | 4.9122  | 8.8692  | -1.3315 |
| CEU | TBC1D3 | 36447242 | 4.1307  | 7.1636  | -1.2415 |

## 2\_TajimasD\_data

|     |        |          |         |         |         |
|-----|--------|----------|---------|---------|---------|
| CEU | TBC1D3 | 36452242 | 3.3727  | 5.2874  | -1.0295 |
| CEU | TBC1D3 | 36457242 | 2.8973  | 5.2874  | -1.2852 |
| CEU | TBC1D3 | 36462242 | 1.8932  | 4.4346  | -1.5946 |
| CEU | TBC1D3 | 36467242 | 1.9944  | 4.4346  | -1.5311 |
| CEU | TBC1D3 | 36472242 | 2.1952  | 5.6286  | -1.7464 |
| CEU | TBC1D3 | 36477242 | 2.3966  | 6.6519  | -1.8631 |
| CEU | TBC1D3 | 36482242 | 1.7539  | 6.1402  | -2.0641 |
| CEU | TBC1D3 | 36487242 | 2.4212  | 7.6753  | -2.0195 |
| CEU | TBC1D3 | 36492242 | 3.7873  | 7.8459  | -1.5289 |
| CEU | TBC1D3 | 36497242 | 4.329   | 6.3108  | -0.9099 |
| CEU | TBC1D3 | 36502242 | 3.8942  | 5.9697  | -1.0017 |
| CEU | TBC1D3 | 36507242 | 3.3377  | 5.9697  | -1.2702 |
| CEU | TBC1D3 | 36512242 | 3.3502  | 6.8225  | -1.4858 |
| CEU | TBC1D3 | 36517242 | 2.7275  | 5.2874  | -1.3765 |
| CEU | TBC1D3 | 36522242 | 3.2756  | 4.9463  | -0.9528 |
| CEU | TBC1D3 | 36527242 | 4.8947  | 7.1636  | -0.9288 |
| CEU | TBC1D3 | 36532242 | 4.6048  | 7.8459  | -1.221  |
| CEU | TBC1D3 | 36537242 | 4.3577  | 6.9931  | -1.1027 |
| CEU | TBC1D3 | 36542242 | 8.7285  | 9.0398  | -0.1029 |
| CEU | TBC1D3 | 36547242 | 7.3504  | 8.187   | -0.3031 |
| CEU | TBC1D3 | 36552242 | 2.0016  | 5.1169  | -1.7244 |
| CEU | TBC1D3 | 36557242 | 2.5531  | 5.7991  | -1.6077 |
| CEU | TBC1D3 | 36562242 | 5.3556  | 8.187   | -1.0258 |
| CEU | TBC1D3 | 36567242 | 8.1231  | 9.8926  | -0.538  |
| CEU | TBC1D3 | 36572242 | 10.6335 | 9.5515  | 0.3399  |
| CEU | TBC1D3 | 36577242 | 12.7959 | 10.2337 | 0.7548  |
| CEU | TBC1D3 | 36582242 | 11.3352 | 9.8926  | 0.4386  |
| CEU | TBC1D3 | 36587242 | 6.7095  | 8.3576  | -0.5859 |
| CEU | TBC1D3 | 36592242 | 11.4084 | 9.3809  | 0.6477  |
| CEU | TBC1D3 | 36597242 | 14.8633 | 10.916  | 1.0948  |
| CEU | TBC1D3 | 36602242 | 10.732  | 11.4277 | -0.1848 |
| CEU | TBC1D3 | 36607242 | 10.0919 | 11.4277 | -0.3549 |
| CEU | TBC1D3 | 36612242 | 11.9654 | 10.0632 | 0.5693  |
| CEU | TBC1D3 | 36617242 | 10.5275 | 8.6987  | 0.6265  |
| CEU | TBC1D3 | 36622242 | 7.5044  | 7.8459  | -0.1286 |
| CEU | TBC1D3 | 36627242 | 9.0103  | 8.8692  | 0.0475  |
| CEU | TBC1D3 | 36632242 | 10.0314 | 11.2571 | -0.3303 |
| CEU | TBC1D3 | 36637242 | 10.6398 | 11.2571 | -0.1663 |
| CEU | TBC1D3 | 36642242 | 10.953  | 9.5515  | 0.4403  |
| CEU | TBC1D3 | 36647242 | 12.9093 | 9.0398  | 1.2793  |
| CEU | TBC1D3 | 36652242 | 12.0219 | 11.2571 | 0.2061  |
| CEU | TBC1D3 | 36657242 | 9.2323  | 10.0632 | -0.2487 |
| CEU | TBC1D3 | 36662242 | 7.6961  | 6.4814  | 0.5444  |
| CEU | TBC1D3 | 36667242 | 7.543   | 7.5047  | 0.015   |
| CEU | TBC1D3 | 36672242 | 8.8178  | 9.7221  | -0.2795 |
| CEU | TBC1D3 | 36677242 | 11.0451 | 11.2571 | -0.0571 |
| CEU | TBC1D3 | 36682242 | 11.5328 | 11.5982 | -0.0171 |
| CEU | TBC1D3 | 36687242 | 7.4483  | 10.4043 | -0.8575 |
| CEU | TBC1D3 | 36692242 | 5.1977  | 8.8692  | -1.2355 |



## 2\_TajimasD\_data

|     |        |          |         |         |         |
|-----|--------|----------|---------|---------|---------|
| CEU | TBC1D3 | 36697242 | 4.6558  | 8.5281  | -1.3511 |
| CEU | TBC1D3 | 36702242 | 5.0209  | 9.0398  | -1.3287 |
| CEU | TBC1D3 | 36707242 | 4.6157  | 8.5281  | -1.3651 |
| CEU | TBC1D3 | 36712242 | 2.5753  | 6.4814  | -1.7508 |
| CEU | TBC1D3 | 36717242 | 3.0484  | 6.6519  | -1.5777 |
| CEU | TBC1D3 | 36722242 | 4.7697  | 8.0164  | -1.1992 |
| CEU | TBC1D3 | 36727242 | 4.6625  | 7.5047  | -1.1151 |
| CEU | TBC1D3 | 36732242 | 4.4908  | 8.0164  | -1.3022 |
| CEU | TBC1D3 | 36737242 | 4.8912  | 7.5047  | -1.0254 |
| CEU | TBC1D3 | 36742242 | 6.1482  | 7.1636  | -0.4157 |
| CEU | TBC1D3 | 36747242 | 5.2523  | 7.6753  | -0.9313 |
| CEU | TBC1D3 | 36752242 | 2.1666  | 5.7991  | -1.7992 |
| CEU | TBC1D3 | 36757242 | 2.2214  | 5.1169  | -1.6027 |
| CEU | TBC1D3 | 36762242 | 5.301   | 6.8225  | -0.651  |
| CEU | TBC1D3 | 36767242 | 7.7194  | 8.5281  | -0.2822 |
| CEU | TBC1D3 | 36772242 | 8.3253  | 10.0632 | -0.5201 |
| CEU | TBC1D3 | 36777242 | 11.5403 | 11.0866 | 0.124   |
| CEU | TBC1D3 | 36782242 | 13.7934 | 11.5982 | 0.5752  |
| CEU | TBC1D3 | 36787242 | 13.9022 | 12.4511 | 0.3556  |
| CEU | TBC1D3 | 36792242 | 15.8461 | 12.4511 | 0.832   |
| CEU | TBC1D3 | 36797242 | 12.8101 | 10.916  | 0.5253  |
| CEU | TBC1D3 | 36802242 | 6.6193  | 8.5281  | -0.666  |
| CEU | TBC1D3 | 36807242 | 5.3605  | 6.9931  | -0.6831 |
| CEU | TBC1D3 | 36812242 | 7.4383  | 9.0398  | -0.5295 |
| CEU | TBC1D3 | 36817242 | 7.4958  | 9.3809  | -0.6022 |
| CEU | TBC1D3 | 36822242 | 6.5133  | 6.6519  | -0.0607 |
| CEU | TBC1D3 | 36827242 | 5.9293  | 6.4814  | -0.2475 |
| CHB | TBC1D3 | 35827242 | 6.3135  | 7.4543  | -0.449  |
| CHB | TBC1D3 | 35832242 | 5.8403  | 7.2848  | -0.5806 |
| CHB | TBC1D3 | 35837242 | 5.2204  | 5.9295  | -0.3433 |
| CHB | TBC1D3 | 35842242 | 3.7959  | 5.4213  | -0.8523 |
| CHB | TBC1D3 | 35847242 | 4.7428  | 7.2848  | -1.0218 |
| CHB | TBC1D3 | 35852242 | 6.2492  | 7.7931  | -0.5835 |
| CHB | TBC1D3 | 35857242 | 7.5203  | 7.9625  | -0.1639 |
| CHB | TBC1D3 | 35862242 | 7.9427  | 7.9625  | -0.0073 |
| CHB | TBC1D3 | 35867242 | 7.5662  | 8.1319  | -0.2056 |
| CHB | TBC1D3 | 35872242 | 8.1066  | 9.3178  | -0.3882 |
| CHB | TBC1D3 | 35877242 | 6.3099  | 7.6237  | -0.5066 |
| CHB | TBC1D3 | 35882242 | 6.7746  | 8.4708  | -0.5938 |
| CHB | TBC1D3 | 35887242 | 7.5913  | 9.1484  | -0.5077 |
| CHB | TBC1D3 | 35892242 | 8.0925  | 7.2848  | 0.3247  |
| CHB | TBC1D3 | 35897242 | 8.7076  | 7.9625  | 0.2761  |
| CHB | TBC1D3 | 35902242 | 5.3684  | 6.946   | -0.6622 |
| CHB | TBC1D3 | 35907242 | 2.4028  | 5.5907  | -1.6265 |
| CHB | TBC1D3 | 35912242 | 2.1978  | 4.4048  | -1.3888 |
| CHB | TBC1D3 | 35917242 | 2.7293  | 4.4048  | -1.0543 |
| CHB | TBC1D3 | 35922242 | 3.94    | 5.7601  | -0.9043 |
| CHB | TBC1D3 | 35927242 | 4.1611  | 5.2519  | -0.5883 |
| CHB | TBC1D3 | 35932242 | 3.5205  | 6.946   | -1.4379 |

## 2\_TajimasD\_data

|     |        |          |         |         |         |
|-----|--------|----------|---------|---------|---------|
| CHB | TBC1D3 | 35937242 | 2.6023  | 6.0989  | -1.6505 |
| CHB | TBC1D3 | 35942242 | 2.7257  | 4.913   | -1.2511 |
| CHB | TBC1D3 | 35947242 | 3.9408  | 6.2684  | -1.072  |
| CHB | TBC1D3 | 35952242 | 6.0392  | 6.6072  | -0.2495 |
| CHB | TBC1D3 | 35957242 | 6.5005  | 5.7601  | 0.3678  |
| CHB | TBC1D3 | 35962242 | 4.2694  | 6.4378  | -0.975  |
| CHB | TBC1D3 | 35967242 | 6.8997  | 9.4872  | -0.8156 |
| CHB | TBC1D3 | 35972242 | 6.2294  | 7.4543  | -0.4822 |
| CHB | TBC1D3 | 35977242 | 2.4641  | 4.5742  | -1.2849 |
| CHB | TBC1D3 | 35982242 | 4.2534  | 5.7601  | -0.7486 |
| CHB | TBC1D3 | 35987242 | 7.0236  | 7.9625  | -0.3479 |
| CHB | TBC1D3 | 35992242 | 6.5926  | 7.2848  | -0.2782 |
| CHB | TBC1D3 | 35997242 | 6.2233  | 6.6072  | -0.1686 |
| CHB | TBC1D3 | 36002242 | 6.25    | 6.4378  | -0.0844 |
| CHB | TBC1D3 | 36007242 | 4.5142  | 5.4213  | -0.4757 |
| CHB | TBC1D3 | 36012242 | 2.7748  | 4.4048  | -1.0257 |
| CHB | TBC1D3 | 36017242 | 4.5591  | 5.5907  | -0.5263 |
| CHB | TBC1D3 | 36022242 | 7.8079  | 8.6402  | -0.2861 |
| CHB | TBC1D3 | 36027242 | 9.7122  | 9.3178  | 0.1264  |
| CHB | TBC1D3 | 36032242 | 9.4832  | 8.979   | 0.1673  |
| CHB | TBC1D3 | 36037242 | 6.0621  | 8.1319  | -0.7523 |
| CHB | TBC1D3 | 36042242 | 6.6781  | 8.6402  | -0.6744 |
| CHB | TBC1D3 | 36047242 | 8.7105  | 10.1649 | -0.4299 |
| CHB | TBC1D3 | 36052242 | 10.5065 | 11.5202 | -0.2665 |
| CHB | TBC1D3 | 36057242 | 14.0743 | 12.7061 | 0.328   |
| CHB | TBC1D3 | 36062242 | 12.2699 | 10.1649 | 0.6223  |
| CHB | TBC1D3 | 36067242 | 5.954   | 7.7931  | -0.6951 |
| CHB | TBC1D3 | 36072242 | 4.2489  | 9.9955  | -1.7256 |
| CHB | TBC1D3 | 36077242 | 6.7636  | 9.8261  | -0.9344 |
| CHB | TBC1D3 | 36082242 | 10.1492 | 11.012  | -0.2367 |
| CHB | TBC1D3 | 36087242 | 9.3853  | 11.3508 | -0.524  |
| CHB | TBC1D3 | 36092242 | 6.5787  | 7.4543  | -0.3447 |
| CHB | TBC1D3 | 36097242 | 8.53    | 7.2848  | 0.5005  |
| CHB | TBC1D3 | 36102242 | 9.2435  | 8.3013  | 0.336   |
| CHB | TBC1D3 | 36107242 | 5.7419  | 7.6237  | -0.7257 |
| CHB | TBC1D3 | 36112242 | 3.96    | 7.7931  | -1.4487 |
| CHB | TBC1D3 | 36117242 | 9.0169  | 9.6567  | -0.1984 |
| CHB | TBC1D3 | 36122242 | 13.185  | 9.9955  | 0.9577  |
| CHB | TBC1D3 | 36127242 | 8.9905  | 9.4872  | -0.1566 |
| CHB | TBC1D3 | 36132242 | 5.2742  | 8.979   | -1.229  |
| CHB | TBC1D3 | 36137242 | 6.5011  | 10.5037 | -1.1475 |
| CHB | TBC1D3 | 36142242 | 6.7276  | 9.9955  | -0.9813 |
| CHB | TBC1D3 | 36147242 | 6.5359  | 8.3013  | -0.6296 |
| CHB | TBC1D3 | 36152242 | 7.7202  | 8.8096  | -0.3678 |
| CHB | TBC1D3 | 36157242 | 6.2579  | 8.4708  | -0.7747 |
| CHB | TBC1D3 | 36162242 | 8.7481  | 8.6402  | 0.0371  |
| CHB | TBC1D3 | 36167242 | 12.8951 | 11.1814 | 0.4634  |
| CHB | TBC1D3 | 36172242 | 12.7251 | 13.7226 | -0.2223 |
| CHB | TBC1D3 | 36177242 | 11.364  | 13.045  | -0.3931 |

## 2\_TajimasD\_data

|     |        |          |         |         |         |
|-----|--------|----------|---------|---------|---------|
| CHB | TBC1D3 | 36182242 | 6.1428  | 10.3343 | -1.2201 |
| CHB | TBC1D3 | 36187242 | 1.7401  | 7.2848  | -2.2288 |
| CHB | TBC1D3 | 36192242 | 4.0404  | 9.3178  | -1.6916 |
| CHB | TBC1D3 | 36197242 | 6.1536  | 10.3343 | -1.2169 |
| CHB | TBC1D3 | 36202242 | 5.92    | 8.1319  | -0.804  |
| CHB | TBC1D3 | 36207242 | 7.5054  | 10.3343 | -0.8235 |
| CHB | TBC1D3 | 36212242 | 8.2157  | 12.5367 | -1.0491 |
| CHB | TBC1D3 | 36217242 | 10.7681 | 12.0285 | -0.3182 |
| CHB | TBC1D3 | 36222242 | 12.5524 | 11.1814 | 0.3707  |
| CHB | TBC1D3 | 36227242 | 12.1746 | 11.5202 | 0.1721  |
| CHB | TBC1D3 | 36232242 | 10.7049 | 8.8096  | 0.6399  |
| CHB | TBC1D3 | 36237242 | 7.4525  | 6.6072  | 0.3713  |
| CHB | TBC1D3 | 36242242 | 10.9682 | 9.4872  | 0.4668  |
| CHB | TBC1D3 | 36247242 | 13.0849 | 9.8261  | 0.9943  |
| CHB | TBC1D3 | 36252242 | 5.6004  | 5.0825  | 0.2875  |
| CHB | TBC1D3 | 36257242 | 1.2559  | 2.7106  | -1.3784 |
| CHB | TBC1D3 | 36262242 | 1.3335  | 2.3718  | -1.096  |
| CHB | TBC1D3 | 36267242 | 0.7978  | 1.5247  | -1.0799 |
| CHB | TBC1D3 | 36272242 | 2.2623  | 2.7106  | -0.4248 |
| CHB | TBC1D3 | 36277242 | 3.5757  | 3.2189  | 0.2933  |
| CHB | TBC1D3 | 36282242 | 1.881   | 1.6942  | 0.2564  |
| CHB | TBC1D3 | 36287242 | 0.1344  | 0.8471  | -1.6071 |
| CHB | TBC1D3 | 36292242 | 2.1424  | 2.033   | 0.1305  |
| CHB | TBC1D3 | 36297242 | 4.1039  | 2.8801  | 1.1034  |
| CHB | TBC1D3 | 36302242 | 2.3493  | 2.2024  | 0.1645  |
| CHB | TBC1D3 | 36307242 | 2.5682  | 2.033   | 0.6382  |
| CHB | TBC1D3 | 36312242 | 2.7419  | 2.7106  | 0.0297  |
| CHB | TBC1D3 | 36317242 | 1.3034  | 1.6942  | -0.5363 |
| CHB | TBC1D3 | 36322242 | 0.8865  | 0.6777  | 0.5459  |
| CHB | TBC1D3 | 36327242 | 0.1887  | 0.8471  | -1.4847 |
| CHB | TBC1D3 | 36332242 | 0.5804  | 1.0165  | -0.8679 |
| CHB | TBC1D3 | 36337242 | 0.4493  | 0.5082  | -0.1849 |
| CHB | TBC1D3 | 36342242 | 0.0752  | 0.1694  | -0.5598 |
| CHB | TBC1D3 | 36347242 | 1.0758  | 1.0165  | 0.118   |
| CHB | TBC1D3 | 36352242 | 1.945   | 2.3718  | -0.4505 |
| CHB | TBC1D3 | 36357242 | 3.1161  | 3.3883  | -0.2144 |
| CHB | TBC1D3 | 36362242 | 3.6872  | 4.4048  | -0.4516 |
| CHB | TBC1D3 | 36367242 | 2.8508  | 4.2354  | -0.9014 |
| CHB | TBC1D3 | 36372242 | 4.0609  | 4.066   | -0.0034 |
| CHB | TBC1D3 | 36377242 | 5.2354  | 4.4048  | 0.5227  |
| CHB | TBC1D3 | 36382242 | 3.5707  | 4.2354  | -0.4327 |
| CHB | TBC1D3 | 36387242 | 1.5966  | 4.2354  | -1.7179 |
| CHB | TBC1D3 | 36392242 | 2.9143  | 4.913   | -1.1433 |
| CHB | TBC1D3 | 36397242 | 4.7112  | 5.7601  | -0.5211 |
| CHB | TBC1D3 | 36402242 | 3.495   | 4.913   | -0.8111 |
| CHB | TBC1D3 | 36407242 | 1.6493  | 6.2684  | -2.1274 |
| CHB | TBC1D3 | 36412242 | 1.3691  | 7.2848  | -2.3779 |
| CHB | TBC1D3 | 36417242 | 1.455   | 5.2519  | -2.0478 |
| CHB | TBC1D3 | 36422242 | 0.8982  | 4.913   | -2.2965 |

## 2\_TajimasD\_data

|     |        |          |         |         |         |
|-----|--------|----------|---------|---------|---------|
| CHB | TBC1D3 | 36427242 | 0.6044  | 5.9295  | -2.578  |
| CHB | TBC1D3 | 36432242 | 1.4209  | 6.7766  | -2.299  |
| CHB | TBC1D3 | 36437242 | 1.5955  | 7.9625  | -2.3594 |
| CHB | TBC1D3 | 36442242 | 1.1801  | 10.3343 | -2.6647 |
| CHB | TBC1D3 | 36447242 | 1.1186  | 9.8261  | -2.6567 |
| CHB | TBC1D3 | 36452242 | 1.1991  | 7.9625  | -2.5063 |
| CHB | TBC1D3 | 36457242 | 1.0921  | 6.2684  | -2.384  |
| CHB | TBC1D3 | 36462242 | 2.234   | 6.946   | -1.9779 |
| CHB | TBC1D3 | 36467242 | 2.9878  | 7.6237  | -1.7877 |
| CHB | TBC1D3 | 36472242 | 3.2294  | 8.8096  | -1.884  |
| CHB | TBC1D3 | 36477242 | 3.7066  | 9.3178  | -1.7986 |
| CHB | TBC1D3 | 36482242 | 2.0767  | 6.4378  | -1.9609 |
| CHB | TBC1D3 | 36487242 | 2.1348  | 7.2848  | -2.0701 |
| CHB | TBC1D3 | 36492242 | 3.4142  | 7.6237  | -1.6233 |
| CHB | TBC1D3 | 36497242 | 3.2286  | 7.7931  | -1.7251 |
| CHB | TBC1D3 | 36502242 | 2.7619  | 7.6237  | -1.8748 |
| CHB | TBC1D3 | 36507242 | 3.166   | 4.913   | -0.9993 |
| CHB | TBC1D3 | 36512242 | 3.574   | 4.2354  | -0.4306 |
| CHB | TBC1D3 | 36517242 | 3.4571  | 5.0825  | -0.9024 |
| CHB | TBC1D3 | 36522242 | 4.858   | 5.5907  | -0.3738 |
| CHB | TBC1D3 | 36527242 | 6.6876  | 6.7766  | -0.0382 |
| CHB | TBC1D3 | 36532242 | 6.0895  | 8.4708  | -0.8336 |
| CHB | TBC1D3 | 36537242 | 6.0048  | 8.6402  | -0.9059 |
| CHB | TBC1D3 | 36542242 | 10.6891 | 10.8426 | -0.0427 |
| CHB | TBC1D3 | 36547242 | 8.8011  | 10.5037 | -0.4881 |
| CHB | TBC1D3 | 36552242 | 3.0152  | 6.946   | -1.65   |
| CHB | TBC1D3 | 36557242 | 3.8443  | 6.7766  | -1.2587 |
| CHB | TBC1D3 | 36562242 | 8.4447  | 8.8096  | -0.1232 |
| CHB | TBC1D3 | 36567242 | 10.9695 | 10.3343 | 0.1849  |
| CHB | TBC1D3 | 36572242 | 11.039  | 10.1649 | 0.2584  |
| CHB | TBC1D3 | 36577242 | 14.0864 | 11.8591 | 0.5698  |
| CHB | TBC1D3 | 36582242 | 11.336  | 9.9955  | 0.4025  |
| CHB | TBC1D3 | 36587242 | 4.9709  | 7.7931  | -1.0666 |
| CHB | TBC1D3 | 36592242 | 10.6221 | 9.9955  | 0.1882  |
| CHB | TBC1D3 | 36597242 | 13.1199 | 10.6731 | 0.6911  |
| CHB | TBC1D3 | 36602242 | 7.827   | 11.5202 | -0.971  |
| CHB | TBC1D3 | 36607242 | 6.8799  | 9.9955  | -0.9356 |
| CHB | TBC1D3 | 36612242 | 10.2812 | 8.4708  | 0.6338  |
| CHB | TBC1D3 | 36617242 | 8.7733  | 9.4872  | -0.225  |
| CHB | TBC1D3 | 36622242 | 5.0447  | 9.1484  | -1.338  |
| CHB | TBC1D3 | 36627242 | 8.254   | 8.4708  | -0.0759 |
| CHB | TBC1D3 | 36632242 | 9.8771  | 9.3178  | 0.1793  |
| CHB | TBC1D3 | 36637242 | 10.611  | 8.8096  | 0.6082  |
| CHB | TBC1D3 | 36642242 | 9.4868  | 7.9625  | 0.5649  |
| CHB | TBC1D3 | 36647242 | 8.2362  | 10.3343 | -0.6107 |
| CHB | TBC1D3 | 36652242 | 8.6183  | 10.8426 | -0.619  |
| CHB | TBC1D3 | 36657242 | 8.5313  | 8.979   | -0.1485 |
| CHB | TBC1D3 | 36662242 | 6.1864  | 7.7931  | -0.6072 |
| CHB | TBC1D3 | 36667242 | 5.1845  | 8.8096  | -1.2239 |

## 2\_TajimasD\_data

|     |        |          |         |         |         |
|-----|--------|----------|---------|---------|---------|
| CHB | TBC1D3 | 36672242 | 7.1517  | 10.5037 | -0.961  |
| CHB | TBC1D3 | 36677242 | 8.3234  | 11.6896 | -0.873  |
| CHB | TBC1D3 | 36682242 | 7.3904  | 12.0285 | -1.1709 |
| CHB | TBC1D3 | 36687242 | 5.6511  | 11.012  | -1.4704 |
| CHB | TBC1D3 | 36692242 | 5.6322  | 10.1649 | -1.3399 |
| CHB | TBC1D3 | 36697242 | 4.6659  | 8.979   | -1.4308 |
| CHB | TBC1D3 | 36702242 | 4.0301  | 7.9625  | -1.4572 |
| CHB | TBC1D3 | 36707242 | 3.7999  | 7.7931  | -1.5092 |
| CHB | TBC1D3 | 36712242 | 2.4173  | 6.2684  | -1.7737 |
| CHB | TBC1D3 | 36717242 | 2.2705  | 5.4213  | -1.6522 |
| CHB | TBC1D3 | 36722242 | 3.6665  | 6.946   | -1.3766 |
| CHB | TBC1D3 | 36727242 | 4.2861  | 6.6072  | -1.0195 |
| CHB | TBC1D3 | 36732242 | 3.6815  | 6.4378  | -1.2393 |
| CHB | TBC1D3 | 36737242 | 3.8991  | 7.7931  | -1.4717 |
| CHB | TBC1D3 | 36742242 | 5.596   | 8.3013  | -0.9648 |
| CHB | TBC1D3 | 36747242 | 5.2305  | 8.979   | -1.2435 |
| CHB | TBC1D3 | 36752242 | 2.8306  | 6.946   | -1.7275 |
| CHB | TBC1D3 | 36757242 | 2.5159  | 4.913   | -1.3711 |
| CHB | TBC1D3 | 36762242 | 4.0735  | 6.0989  | -0.9561 |
| CHB | TBC1D3 | 36767242 | 6.3712  | 7.4543  | -0.4263 |
| CHB | TBC1D3 | 36772242 | 9.1808  | 9.3178  | -0.0439 |
| CHB | TBC1D3 | 36777242 | 11.4951 | 13.045  | -0.3624 |
| CHB | TBC1D3 | 36782242 | 11.3706 | 13.3838 | -0.4595 |
| CHB | TBC1D3 | 36787242 | 12.7412 | 12.3673 | 0.092   |
| CHB | TBC1D3 | 36792242 | 13.1628 | 12.0285 | 0.2864  |
| CHB | TBC1D3 | 36797242 | 7.2119  | 12.8755 | -1.3408 |
| CHB | TBC1D3 | 36802242 | 2.5464  | 14.0615 | -2.5077 |
| CHB | TBC1D3 | 36807242 | 2.6895  | 10.1649 | -2.2098 |
| CHB | TBC1D3 | 36812242 | 4.4622  | 9.3178  | -1.5564 |
| CHB | TBC1D3 | 36817242 | 4.8673  | 9.8261  | -1.5129 |
| CHB | TBC1D3 | 36822242 | 4.6946  | 7.2848  | -1.0412 |
| CHB | TBC1D3 | 36827242 | 4.6376  | 6.4378  | -0.8094 |
| YRI | TBC1D3 | 35827242 | 9.2605  | 12.1005 | -0.7105 |
| YRI | TBC1D3 | 35832242 | 9.057   | 12.7727 | -0.8834 |
| YRI | TBC1D3 | 35837242 | 7.9464  | 11.2602 | -0.8871 |
| YRI | TBC1D3 | 35842242 | 7.0162  | 9.9157  | -0.8742 |
| YRI | TBC1D3 | 35847242 | 8.7882  | 10.5879 | -0.5104 |
| YRI | TBC1D3 | 35852242 | 8.9567  | 12.2685 | -0.8178 |
| YRI | TBC1D3 | 35857242 | 8.7105  | 13.613  | -1.0973 |
| YRI | TBC1D3 | 35862242 | 8.6564  | 12.7727 | -0.9786 |
| YRI | TBC1D3 | 35867242 | 8.528   | 12.9408 | -1.0362 |
| YRI | TBC1D3 | 35872242 | 10.3478 | 14.2853 | -0.8419 |
| YRI | TBC1D3 | 35877242 | 8.1149  | 14.1172 | -1.2979 |
| YRI | TBC1D3 | 35882242 | 8.0172  | 14.6214 | -1.3812 |
| YRI | TBC1D3 | 35887242 | 8.4399  | 12.6047 | -1.0026 |
| YRI | TBC1D3 | 35892242 | 6.6374  | 11.4282 | -1.2648 |
| YRI | TBC1D3 | 35897242 | 7.2635  | 11.9324 | -1.1836 |
| YRI | TBC1D3 | 35902242 | 7.3     | 11.5963 | -1.1188 |
| YRI | TBC1D3 | 35907242 | 5.8451  | 10.756  | -1.3723 |

## 2\_TajimasD\_data

|     |        |          |         |         |         |
|-----|--------|----------|---------|---------|---------|
| YRI | TBC1D3 | 35912242 | 3.9432  | 9.0754  | -1.68   |
| YRI | TBC1D3 | 35917242 | 3.9632  | 8.7392  | -1.6189 |
| YRI | TBC1D3 | 35922242 | 5.1108  | 10.756  | -1.5775 |
| YRI | TBC1D3 | 35927242 | 4.5469  | 10.924  | -1.7564 |
| YRI | TBC1D3 | 35932242 | 5.5948  | 11.5963 | -1.5628 |
| YRI | TBC1D3 | 35937242 | 4.9909  | 10.5879 | -1.5873 |
| YRI | TBC1D3 | 35942242 | 4.7847  | 9.0754  | -1.4045 |
| YRI | TBC1D3 | 35947242 | 5.7683  | 10.5879 | -1.3668 |
| YRI | TBC1D3 | 35952242 | 6.0034  | 10.2518 | -1.2417 |
| YRI | TBC1D3 | 35957242 | 6.4057  | 10.924  | -1.2444 |
| YRI | TBC1D3 | 35962242 | 5.4881  | 11.7644 | -1.6124 |
| YRI | TBC1D3 | 35967242 | 8.893   | 13.9492 | -1.1058 |
| YRI | TBC1D3 | 35972242 | 8.9072  | 12.2685 | -0.8301 |
| YRI | TBC1D3 | 35977242 | 4.7233  | 8.4031  | -1.2933 |
| YRI | TBC1D3 | 35982242 | 5.1812  | 9.2434  | -1.3073 |
| YRI | TBC1D3 | 35987242 | 8.6632  | 12.2685 | -0.8903 |
| YRI | TBC1D3 | 35992242 | 8.1654  | 10.756  | -0.7239 |
| YRI | TBC1D3 | 35997242 | 7.0689  | 10.924  | -1.0618 |
| YRI | TBC1D3 | 36002242 | 8.1743  | 12.7727 | -1.0932 |
| YRI | TBC1D3 | 36007242 | 7.1974  | 10.924  | -1.0264 |
| YRI | TBC1D3 | 36012242 | 5.5354  | 11.5963 | -1.5783 |
| YRI | TBC1D3 | 36017242 | 6.3645  | 12.2685 | -1.458  |
| YRI | TBC1D3 | 36022242 | 9.7171  | 14.7895 | -1.0493 |
| YRI | TBC1D3 | 36027242 | 11.8638 | 15.1256 | -0.6605 |
| YRI | TBC1D3 | 36032242 | 11.4314 | 13.2769 | -0.423  |
| YRI | TBC1D3 | 36037242 | 10.5799 | 12.6047 | -0.4874 |
| YRI | TBC1D3 | 36042242 | 11.8863 | 13.1089 | -0.2836 |
| YRI | TBC1D3 | 36047242 | 13.9881 | 15.9659 | -0.3804 |
| YRI | TBC1D3 | 36052242 | 14.0817 | 17.1423 | -0.5499 |
| YRI | TBC1D3 | 36057242 | 14.8968 | 16.4701 | -0.2937 |
| YRI | TBC1D3 | 36062242 | 13.0354 | 13.7811 | -0.165  |
| YRI | TBC1D3 | 36067242 | 8.1398  | 11.0921 | -0.8016 |
| YRI | TBC1D3 | 36072242 | 6.3964  | 12.2685 | -1.4501 |
| YRI | TBC1D3 | 36077242 | 6.2901  | 13.1089 | -1.5817 |
| YRI | TBC1D3 | 36082242 | 11.006  | 14.1172 | -0.6727 |
| YRI | TBC1D3 | 36087242 | 11.5819 | 14.7895 | -0.6636 |
| YRI | TBC1D3 | 36092242 | 8.0454  | 11.9324 | -0.9853 |
| YRI | TBC1D3 | 36097242 | 10.6853 | 13.613  | -0.6553 |
| YRI | TBC1D3 | 36102242 | 11.0411 | 15.2937 | -0.8521 |
| YRI | TBC1D3 | 36107242 | 7.0129  | 12.2685 | -1.2979 |
| YRI | TBC1D3 | 36112242 | 7.0461  | 13.613  | -1.4698 |
| YRI | TBC1D3 | 36117242 | 11.9984 | 15.9659 | -0.763  |
| YRI | TBC1D3 | 36122242 | 16.1417 | 14.7895 | 0.2797  |
| YRI | TBC1D3 | 36127242 | 15.4525 | 14.7895 | 0.1372  |
| YRI | TBC1D3 | 36132242 | 11.6974 | 14.7895 | -0.6397 |
| YRI | TBC1D3 | 36137242 | 11.5807 | 15.2937 | -0.744  |
| YRI | TBC1D3 | 36142242 | 12.107  | 17.8146 | -0.9884 |
| YRI | TBC1D3 | 36147242 | 10.6389 | 16.302  | -1.0676 |
| YRI | TBC1D3 | 36152242 | 8.9603  | 16.134  | -1.3659 |

## 2\_TajimasD\_data

|     |        |          |         |         |         |
|-----|--------|----------|---------|---------|---------|
| YRI | TBC1D3 | 36157242 | 10.3305 | 17.9827 | -1.3132 |
| YRI | TBC1D3 | 36162242 | 15.7442 | 15.2937 | 0.0903  |
| YRI | TBC1D3 | 36167242 | 21.3067 | 17.9827 | 0.5704  |
| YRI | TBC1D3 | 36172242 | 24.5287 | 20.6717 | 0.5788  |
| YRI | TBC1D3 | 36177242 | 22.3818 | 16.8062 | 1.0209  |
| YRI | TBC1D3 | 36182242 | 19.5302 | 16.6382 | 0.5347  |
| YRI | TBC1D3 | 36187242 | 13.8538 | 14.9575 | -0.2259 |
| YRI | TBC1D3 | 36192242 | 11.0491 | 14.9575 | -0.7999 |
| YRI | TBC1D3 | 36197242 | 11.6902 | 16.6382 | -0.9148 |
| YRI | TBC1D3 | 36202242 | 9.6735  | 17.3104 | -1.3593 |
| YRI | TBC1D3 | 36207242 | 9.8605  | 18.4868 | -1.4416 |
| YRI | TBC1D3 | 36212242 | 10.1647 | 17.6465 | -1.3074 |
| YRI | TBC1D3 | 36217242 | 10.6517 | 17.9827 | -1.2581 |
| YRI | TBC1D3 | 36222242 | 12.3184 | 16.134  | -0.7265 |
| YRI | TBC1D3 | 36227242 | 14.1553 | 15.2937 | -0.2281 |
| YRI | TBC1D3 | 36232242 | 11.3885 | 15.6298 | -0.8324 |
| YRI | TBC1D3 | 36237242 | 9.8171  | 16.6382 | -1.2611 |
| YRI | TBC1D3 | 36242242 | 16.1271 | 21.1758 | -0.7403 |
| YRI | TBC1D3 | 36247242 | 15.7583 | 19.1591 | -0.5491 |
| YRI | TBC1D3 | 36252242 | 6.2218  | 8.7392  | -0.8533 |
| YRI | TBC1D3 | 36257242 | 2.7423  | 4.7057  | -1.1622 |
| YRI | TBC1D3 | 36262242 | 2.7414  | 4.2016  | -0.9538 |
| YRI | TBC1D3 | 36267242 | 1.5463  | 3.0251  | -1.2757 |
| YRI | TBC1D3 | 36272242 | 3.2807  | 5.7141  | -1.2134 |
| YRI | TBC1D3 | 36277242 | 3.5635  | 6.5544  | -1.3186 |
| YRI | TBC1D3 | 36282242 | 1.4187  | 3.3612  | -1.5347 |
| YRI | TBC1D3 | 36287242 | 0.5485  | 1.0084  | -0.9169 |
| YRI | TBC1D3 | 36292242 | 2.343   | 2.3529  | -0.0105 |
| YRI | TBC1D3 | 36297242 | 3.6504  | 4.8738  | -0.7023 |
| YRI | TBC1D3 | 36302242 | 3.1297  | 6.5544  | -1.5099 |
| YRI | TBC1D3 | 36307242 | 3.611   | 4.8738  | -0.7249 |
| YRI | TBC1D3 | 36312242 | 2.852   | 3.8654  | -0.7112 |
| YRI | TBC1D3 | 36317242 | 1.5843  | 3.0251  | -1.2429 |
| YRI | TBC1D3 | 36322242 | 1.6986  | 2.3529  | -0.6926 |
| YRI | TBC1D3 | 36327242 | 1.409   | 2.1848  | -0.8711 |
| YRI | TBC1D3 | 36332242 | 1.2324  | 1.0084  | 0.4466  |
| YRI | TBC1D3 | 36337242 | 0.5702  | 0.5042  | 0.2074  |
| YRI | TBC1D3 | 36342242 | 0.2336  | 0.1681  | 0.3894  |
| YRI | TBC1D3 | 36347242 | 1.5045  | 2.3529  | -0.8981 |
| YRI | TBC1D3 | 36352242 | 2.6708  | 4.3696  | -1.0727 |
| YRI | TBC1D3 | 36357242 | 4.6762  | 5.5461  | -0.4455 |
| YRI | TBC1D3 | 36362242 | 5.2185  | 6.5544  | -0.589  |
| YRI | TBC1D3 | 36367242 | 3.7145  | 5.5461  | -0.9379 |
| YRI | TBC1D3 | 36372242 | 4.5875  | 5.378   | -0.416  |
| YRI | TBC1D3 | 36377242 | 5.3098  | 6.7225  | -0.6087 |
| YRI | TBC1D3 | 36382242 | 4.2476  | 7.2267  | -1.2021 |
| YRI | TBC1D3 | 36387242 | 3.849   | 7.7309  | -1.4729 |
| YRI | TBC1D3 | 36392242 | 5.321   | 9.4115  | -1.2946 |
| YRI | TBC1D3 | 36397242 | 6.5878  | 9.2434  | -0.8546 |

## 2\_TajimasD\_data

|     |        |          |         |         |         |
|-----|--------|----------|---------|---------|---------|
| YRI | TBC1D3 | 36402242 | 6.713   | 8.4031  | -0.594  |
| YRI | TBC1D3 | 36407242 | 7.6447  | 11.0921 | -0.936  |
| YRI | TBC1D3 | 36412242 | 8.4949  | 12.9408 | -1.044  |
| YRI | TBC1D3 | 36417242 | 7.8613  | 11.9324 | -1.032  |
| YRI | TBC1D3 | 36422242 | 7.9493  | 10.924  | -0.8193 |
| YRI | TBC1D3 | 36427242 | 8.4882  | 9.9157  | -0.4304 |
| YRI | TBC1D3 | 36432242 | 11.2797 | 13.613  | -0.5222 |
| YRI | TBC1D3 | 36437242 | 13.9579 | 14.6214 | -0.1388 |
| YRI | TBC1D3 | 36442242 | 17.9084 | 13.2769 | 1.0615  |
| YRI | TBC1D3 | 36447242 | 16.3404 | 14.9575 | 0.283   |
| YRI | TBC1D3 | 36452242 | 12.4142 | 15.7978 | -0.6573 |
| YRI | TBC1D3 | 36457242 | 10.6745 | 13.9492 | -0.7162 |
| YRI | TBC1D3 | 36462242 | 8.7349  | 11.9324 | -0.8106 |
| YRI | TBC1D3 | 36467242 | 8.5043  | 12.7727 | -1.0147 |
| YRI | TBC1D3 | 36472242 | 9.3929  | 15.7978 | -1.2442 |
| YRI | TBC1D3 | 36477242 | 11.7229 | 14.9575 | -0.662  |
| YRI | TBC1D3 | 36482242 | 7.8096  | 9.7476  | -0.5937 |
| YRI | TBC1D3 | 36487242 | 7.6435  | 11.2602 | -0.9682 |
| YRI | TBC1D3 | 36492242 | 9.1443  | 12.7727 | -0.8626 |
| YRI | TBC1D3 | 36497242 | 8.0443  | 12.2685 | -1.0432 |
| YRI | TBC1D3 | 36502242 | 7.7895  | 12.7727 | -1.1847 |
| YRI | TBC1D3 | 36507242 | 6.8656  | 11.5963 | -1.2319 |
| YRI | TBC1D3 | 36512242 | 6.8641  | 11.4282 | -1.2049 |
| YRI | TBC1D3 | 36517242 | 5.7163  | 11.4282 | -1.508  |
| YRI | TBC1D3 | 36522242 | 6.2735  | 10.4199 | -1.1936 |
| YRI | TBC1D3 | 36527242 | 8.7406  | 11.4282 | -0.7095 |
| YRI | TBC1D3 | 36532242 | 8.4712  | 12.6047 | -0.9951 |
| YRI | TBC1D3 | 36537242 | 8.3208  | 11.5963 | -0.853  |
| YRI | TBC1D3 | 36542242 | 14.0625 | 17.3104 | -0.5781 |
| YRI | TBC1D3 | 36547242 | 11.8501 | 15.7978 | -0.7669 |
| YRI | TBC1D3 | 36552242 | 4.6895  | 7.5628  | -1.1123 |
| YRI | TBC1D3 | 36557242 | 7.3141  | 10.4199 | -0.8941 |
| YRI | TBC1D3 | 36562242 | 13.8816 | 15.4617 | -0.3133 |
| YRI | TBC1D3 | 36567242 | 16.3861 | 16.9743 | -0.1067 |
| YRI | TBC1D3 | 36572242 | 16.3928 | 16.302  | 0.0171  |
| YRI | TBC1D3 | 36577242 | 17.992  | 17.3104 | 0.1213  |
| YRI | TBC1D3 | 36582242 | 14.8285 | 17.6465 | -0.4924 |
| YRI | TBC1D3 | 36587242 | 10.8305 | 16.9743 | -1.1143 |
| YRI | TBC1D3 | 36592242 | 13.1083 | 18.4868 | -0.8988 |
| YRI | TBC1D3 | 36597242 | 15.8363 | 17.8146 | -0.3426 |
| YRI | TBC1D3 | 36602242 | 18.8279 | 16.6382 | 0.4048  |
| YRI | TBC1D3 | 36607242 | 16.7728 | 16.6382 | 0.0249  |
| YRI | TBC1D3 | 36612242 | 14.4785 | 15.9659 | -0.286  |
| YRI | TBC1D3 | 36617242 | 14.6615 | 16.4701 | -0.3376 |
| YRI | TBC1D3 | 36622242 | 11.8975 | 16.6382 | -0.8764 |
| YRI | TBC1D3 | 36627242 | 11.4547 | 15.9659 | -0.8676 |
| YRI | TBC1D3 | 36632242 | 9.3238  | 13.9492 | -1.0116 |
| YRI | TBC1D3 | 36637242 | 6.9262  | 12.6047 | -1.367  |
| YRI | TBC1D3 | 36642242 | 9.9521  | 17.9827 | -1.3781 |



## 2\_TajimasD\_data

|     |        |          |         |         |         |
|-----|--------|----------|---------|---------|---------|
| YRI | TBC1D3 | 36647242 | 15.8295 | 18.1507 | -0.3948 |
| YRI | TBC1D3 | 36652242 | 18.1648 | 13.9492 | 0.922   |
| YRI | TBC1D3 | 36657242 | 14.0731 | 15.9659 | -0.364  |
| YRI | TBC1D3 | 36662242 | 9.4966  | 14.4534 | -1.0481 |
| YRI | TBC1D3 | 36667242 | 12.1089 | 12.4366 | -0.0799 |
| YRI | TBC1D3 | 36672242 | 13.0492 | 15.6298 | -0.5065 |
| YRI | TBC1D3 | 36677242 | 13.5323 | 19.1591 | -0.9086 |
| YRI | TBC1D3 | 36682242 | 15.6185 | 19.8313 | -0.658  |
| YRI | TBC1D3 | 36687242 | 13.5944 | 16.134  | -0.4835 |
| YRI | TBC1D3 | 36692242 | 11.0333 | 13.445  | -0.5462 |
| YRI | TBC1D3 | 36697242 | 9.9316  | 13.613  | -0.824  |
| YRI | TBC1D3 | 36702242 | 9.7879  | 13.9492 | -0.9101 |
| YRI | TBC1D3 | 36707242 | 9.9436  | 14.1172 | -0.9024 |
| YRI | TBC1D3 | 36712242 | 8.5077  | 12.6047 | -0.9863 |
| YRI | TBC1D3 | 36717242 | 6.0289  | 10.2518 | -1.2342 |
| YRI | TBC1D3 | 36722242 | 6.9829  | 10.0837 | -0.9204 |
| YRI | TBC1D3 | 36727242 | 8.8435  | 10.5879 | -0.4947 |
| YRI | TBC1D3 | 36732242 | 10.1141 | 10.924  | -0.2231 |
| YRI | TBC1D3 | 36737242 | 10.14   | 11.7644 | -0.4173 |
| YRI | TBC1D3 | 36742242 | 10.8273 | 11.9324 | -0.2801 |
| YRI | TBC1D3 | 36747242 | 11.1064 | 12.2685 | -0.287  |
| YRI | TBC1D3 | 36752242 | 6.6755  | 9.2434  | -0.8264 |
| YRI | TBC1D3 | 36757242 | 3.9049  | 8.235   | -1.5504 |
| YRI | TBC1D3 | 36762242 | 6.1647  | 10.0837 | -1.1632 |
| YRI | TBC1D3 | 36767242 | 7.5729  | 10.4199 | -0.8196 |
| YRI | TBC1D3 | 36772242 | 8.9708  | 12.2685 | -0.8144 |
| YRI | TBC1D3 | 36777242 | 13.4426 | 14.9575 | -0.31   |
| YRI | TBC1D3 | 36782242 | 16.6681 | 15.6298 | 0.2038  |
| YRI | TBC1D3 | 36787242 | 18.2279 | 15.4617 | 0.5485  |
| YRI | TBC1D3 | 36792242 | 17.722  | 16.302  | 0.2677  |
| YRI | TBC1D3 | 36797242 | 20.4322 | 17.6465 | 0.4868  |
| YRI | TBC1D3 | 36802242 | 19.0368 | 17.8146 | 0.2116  |
| YRI | TBC1D3 | 36807242 | 10.7255 | 14.4534 | -0.7882 |
| YRI | TBC1D3 | 36812242 | 7.9015  | 12.4366 | -1.1057 |
| YRI | TBC1D3 | 36817242 | 6.4664  | 12.6047 | -1.4777 |
| YRI | TBC1D3 | 36822242 | 5.6946  | 10.756  | -1.4144 |
| YRI | TBC1D3 | 36827242 | 7.7111  | 9.2434  | -0.4931 |
| CEU | TBC1D3 | 35882531 | 7.0371  | 8.187   | -0.4166 |
| CEU | TBC1D3 | 35887531 | 8.3612  | 7.5047  | 0.336   |
| CEU | TBC1D3 | 35892531 | 7.1511  | 5.9697  | 0.5702  |
| CEU | TBC1D3 | 35897531 | 8.1841  | 7.1636  | 0.4177  |
| CEU | TBC1D3 | 35902531 | 5.891   | 6.1402  | -0.1173 |
| CEU | TBC1D3 | 35907531 | 3.1785  | 4.7757  | -0.9394 |
| CEU | TBC1D3 | 35912531 | 2.5644  | 4.4346  | -1.1734 |
| CEU | TBC1D3 | 35917531 | 3.1596  | 4.7757  | -0.9505 |
| CEU | TBC1D3 | 35922531 | 4.3913  | 4.9463  | -0.3165 |
| CEU | TBC1D3 | 35927531 | 4.4032  | 4.6052  | -0.1226 |
| CEU | TBC1D3 | 35932531 | 4.0746  | 5.458   | -0.7232 |
| CEU | TBC1D3 | 35937531 | 2.6729  | 5.1169  | -1.3528 |

## 2\_TajimasD\_data

|     |        |          |         |         |         |
|-----|--------|----------|---------|---------|---------|
| CEU | TBC1D3 | 35942531 | 3.2212  | 5.1169  | -1.0493 |
| CEU | TBC1D3 | 35947531 | 4.0301  | 5.7991  | -0.8762 |
| CEU | TBC1D3 | 35952531 | 5.3529  | 6.8225  | -0.6288 |
| CEU | TBC1D3 | 35957531 | 5.9872  | 6.1402  | -0.072  |
| CEU | TBC1D3 | 35962531 | 4.5764  | 5.2874  | -0.3823 |
| CEU | TBC1D3 | 35967531 | 6.6774  | 7.5047  | -0.3246 |
| CEU | TBC1D3 | 35972531 | 5.2612  | 6.1402  | -0.4136 |
| CEU | TBC1D3 | 35977531 | 2.5463  | 4.2641  | -1.1151 |
| CEU | TBC1D3 | 35982531 | 4.6399  | 6.3108  | -0.7671 |
| CEU | TBC1D3 | 35987531 | 5.0153  | 6.6519  | -0.7165 |
| CEU | TBC1D3 | 35992531 | 3.8829  | 6.3108  | -1.1147 |
| CEU | TBC1D3 | 35997531 | 4.2424  | 6.1402  | -0.8931 |
| CEU | TBC1D3 | 36002531 | 4.5469  | 5.9697  | -0.6867 |
| CEU | TBC1D3 | 36007531 | 3.7392  | 4.6052  | -0.5258 |
| CEU | TBC1D3 | 36012531 | 2.6201  | 3.9229  | -0.9087 |
| CEU | TBC1D3 | 36017531 | 3.6584  | 4.9463  | -0.7345 |
| CEU | TBC1D3 | 36022531 | 5.4995  | 6.1402  | -0.3015 |
| CEU | TBC1D3 | 36027531 | 7.8299  | 9.0398  | -0.4    |
| CEU | TBC1D3 | 36032531 | 9.1179  | 9.2104  | -0.0301 |
| CEU | TBC1D3 | 36037531 | 7.1845  | 8.6987  | -0.5188 |
| CEU | TBC1D3 | 36042531 | 7.9586  | 10.5749 | -0.7475 |
| CEU | TBC1D3 | 36047531 | 7.9905  | 10.2337 | -0.6609 |
| CEU | TBC1D3 | 36052531 | 10.1845 | 11.2571 | -0.289  |
| CEU | TBC1D3 | 36057531 | 15.859  | 12.9627 | 0.6833  |
| CEU | TBC1D3 | 36062531 | 12.7089 | 9.8926  | 0.8563  |
| CEU | TBC1D3 | 36067531 | 6.4438  | 6.4814  | -0.0169 |
| CEU | TBC1D3 | 36072531 | 7.7545  | 7.8459  | -0.0344 |
| CEU | TBC1D3 | 36077531 | 10.0416 | 9.3809  | 0.2111  |
| CEU | TBC1D3 | 36082531 | 10.9462 | 10.2337 | 0.2099  |
| CEU | TBC1D3 | 36087531 | 9.3741  | 10.4043 | -0.2989 |
| CEU | TBC1D3 | 36092531 | 7.2818  | 7.8459  | -0.2125 |
| CEU | TBC1D3 | 36097531 | 10.9518 | 7.8459  | 1.17    |
| CEU | TBC1D3 | 36102531 | 11.4313 | 8.6987  | 0.9362  |
| CEU | TBC1D3 | 36107531 | 7.9342  | 8.6987  | -0.2619 |
| CEU | TBC1D3 | 36112531 | 5.8796  | 9.0398  | -1.0448 |
| CEU | TBC1D3 | 36117531 | 9.7456  | 10.916  | -0.3246 |
| CEU | TBC1D3 | 36122531 | 13.8233 | 11.7688 | 0.531   |
| CEU | TBC1D3 | 36127531 | 11.3174 | 10.916  | 0.1113  |
| CEU | TBC1D3 | 36132531 | 8.2083  | 9.5515  | -0.422  |
| CEU | TBC1D3 | 36137531 | 9.5685  | 9.2104  | 0.1164  |
| CEU | TBC1D3 | 36142531 | 8.9932  | 8.5281  | 0.1623  |
| CEU | TBC1D3 | 36147531 | 5.3733  | 7.6753  | -0.8848 |
| CEU | TBC1D3 | 36152531 | 6.6964  | 9.0398  | -0.7748 |
| CEU | TBC1D3 | 36157531 | 8.7873  | 10.4043 | -0.4691 |
| CEU | TBC1D3 | 36162531 | 12.9975 | 11.9394 | 0.2698  |
| CEU | TBC1D3 | 36167531 | 17.8153 | 15.1801 | 0.5351  |
| CEU | TBC1D3 | 36172531 | 17.7013 | 16.0329 | 0.3216  |
| CEU | TBC1D3 | 36177531 | 14.9643 | 12.9627 | 0.4722  |
| CEU | TBC1D3 | 36182531 | 10.3845 | 12.4511 | -0.5065 |

## 2\_TajimasD\_data

|     |        |          |         |         |         |
|-----|--------|----------|---------|---------|---------|
| CEU | TBC1D3 | 36187531 | 5.2228  | 10.4043 | -1.5031 |
| CEU | TBC1D3 | 36192531 | 7.6698  | 10.2337 | -0.7553 |
| CEU | TBC1D3 | 36197531 | 9.9367  | 9.8926  | 0.0134  |
| CEU | TBC1D3 | 36202531 | 6.6021  | 7.8459  | -0.4686 |
| CEU | TBC1D3 | 36207531 | 7.0124  | 8.6987  | -0.5777 |
| CEU | TBC1D3 | 36212531 | 7.8833  | 8.0164  | -0.0492 |
| CEU | TBC1D3 | 36217531 | 9.0443  | 8.3576  | 0.2441  |
| CEU | TBC1D3 | 36222531 | 10.0346 | 9.0398  | 0.3289  |
| CEU | TBC1D3 | 36227531 | 10.6203 | 10.2337 | 0.1139  |
| CEU | TBC1D3 | 36232531 | 10.368  | 10.2337 | 0.0396  |
| CEU | TBC1D3 | 36237531 | 7.3478  | 8.0164  | -0.247  |
| CEU | TBC1D3 | 36242531 | 9.645   | 9.3809  | 0.0844  |
| CEU | TBC1D3 | 36247531 | 11.3587 | 9.2104  | 0.6981  |
| CEU | TBC1D3 | 36252531 | 5.343   | 4.2641  | 0.7004  |
| CEU | TBC1D3 | 36257531 | 2.5399  | 2.2173  | 0.3604  |
| CEU | TBC1D3 | 36262531 | 2.7654  | 2.0467  | 0.8552  |
| CEU | TBC1D3 | 36267531 | 1.4566  | 1.3645  | 0.149   |
| CEU | TBC1D3 | 36272531 | 2.5298  | 2.0467  | 0.5748  |
| CEU | TBC1D3 | 36277531 | 3.7718  | 3.2407  | 0.4355  |
| CEU | TBC1D3 | 36282531 | 1.967   | 2.2173  | -0.2796 |
| CEU | TBC1D3 | 36287531 | 0.0202  | 0.3411  | -1.2864 |
| CEU | TBC1D3 | 36292531 | 2.2533  | 1.8762  | 0.4801  |
| CEU | TBC1D3 | 36297531 | 3.7547  | 2.8996  | 0.769   |
| CEU | TBC1D3 | 36302531 | 2.1171  | 2.0467  | 0.0838  |
| CEU | TBC1D3 | 36307531 | 2.618   | 2.2173  | 0.4477  |
| CEU | TBC1D3 | 36312531 | 3.0301  | 3.5818  | -0.4158 |
| CEU | TBC1D3 | 36317531 | 1.545   | 2.8996  | -1.2182 |
| CEU | TBC1D3 | 36322531 | 1.0464  | 1.1939  | -0.2628 |
| CEU | TBC1D3 | 36327531 | 0.7471  | 0.8528  | -0.238  |
| CEU | TBC1D3 | 36332531 | 0.2482  | 0.6822  | -1.1333 |
| CEU | TBC1D3 | 36337531 | 0.0202  | 0.3411  | -1.2864 |
| CEU | TBC1D3 | 36342531 | 0.1748  | 0.1706  | 0.0249  |
| CEU | TBC1D3 | 36347531 | 2.0238  | 1.5351  | 0.7246  |
| CEU | TBC1D3 | 36352531 | 2.8517  | 2.3879  | 0.4884  |
| CEU | TBC1D3 | 36357531 | 3.3154  | 4.2641  | -0.6158 |
| CEU | TBC1D3 | 36362531 | 3.858   | 5.7991  | -0.9614 |
| CEU | TBC1D3 | 36367531 | 3.0309  | 4.7757  | -1.0262 |
| CEU | TBC1D3 | 36372531 | 3.7759  | 5.458   | -0.8794 |
| CEU | TBC1D3 | 36377531 | 4.4253  | 4.7757  | -0.2061 |
| CEU | TBC1D3 | 36382531 | 3.2298  | 3.5818  | -0.2653 |
| CEU | TBC1D3 | 36387531 | 1.9505  | 3.7524  | -1.3054 |
| CEU | TBC1D3 | 36392531 | 3.8067  | 4.7757  | -0.5699 |
| CEU | TBC1D3 | 36397531 | 5.368   | 5.1169  | 0.139   |
| CEU | TBC1D3 | 36402531 | 4.2673  | 4.0935  | 0.1169  |
| CEU | TBC1D3 | 36407531 | 3.3459  | 6.1402  | -1.3149 |
| CEU | TBC1D3 | 36412531 | 3.0227  | 7.1636  | -1.6951 |
| CEU | TBC1D3 | 36417531 | 3.234   | 6.3108  | -1.4126 |
| CEU | TBC1D3 | 36422531 | 2.6461  | 5.458   | -1.47   |
| CEU | TBC1D3 | 36427531 | 2.2259  | 4.7757  | -1.4996 |

## 2\_TajimasD\_data

|     |        |          |         |         |         |
|-----|--------|----------|---------|---------|---------|
| CEU | TBC1D3 | 36432531 | 4.201   | 6.6519  | -1.0731 |
| CEU | TBC1D3 | 36437531 | 5.0221  | 8.187   | -1.1466 |
| CEU | TBC1D3 | 36442531 | 4.892   | 8.6987  | -1.3042 |
| CEU | TBC1D3 | 36447531 | 4.0633  | 7.1636  | -1.2691 |
| CEU | TBC1D3 | 36452531 | 3.4706  | 5.458   | -1.039  |
| CEU | TBC1D3 | 36457531 | 2.8204  | 5.1169  | -1.2712 |
| CEU | TBC1D3 | 36462531 | 1.7953  | 4.2641  | -1.6026 |
| CEU | TBC1D3 | 36467531 | 1.9643  | 4.2641  | -1.4929 |
| CEU | TBC1D3 | 36472531 | 2.1851  | 5.458   | -1.711  |
| CEU | TBC1D3 | 36477531 | 2.3966  | 6.6519  | -1.8631 |
| CEU | TBC1D3 | 36482531 | 1.764   | 6.3108  | -2.0875 |
| CEU | TBC1D3 | 36487531 | 2.5172  | 7.8459  | -2.0074 |
| CEU | TBC1D3 | 36492531 | 3.7772  | 7.6753  | -1.4983 |
| CEU | TBC1D3 | 36497531 | 4.243   | 6.3108  | -0.9494 |
| CEU | TBC1D3 | 36502531 | 3.8942  | 5.9697  | -1.0017 |
| CEU | TBC1D3 | 36507531 | 3.3276  | 5.7991  | -1.2241 |
| CEU | TBC1D3 | 36512531 | 3.4562  | 6.9931  | -1.4799 |
| CEU | TBC1D3 | 36517531 | 2.7275  | 5.2874  | -1.3765 |
| CEU | TBC1D3 | 36522531 | 3.3754  | 5.2874  | -1.0281 |
| CEU | TBC1D3 | 36527531 | 4.8947  | 7.3342  | -0.9774 |
| CEU | TBC1D3 | 36532531 | 4.5906  | 7.5047  | -1.1434 |
| CEU | TBC1D3 | 36537531 | 4.3678  | 6.9931  | -1.0985 |
| CEU | TBC1D3 | 36542531 | 8.537   | 8.8692  | -0.1118 |
| CEU | TBC1D3 | 36547531 | 7.6568  | 8.3576  | -0.2491 |
| CEU | TBC1D3 | 36552531 | 2.0118  | 5.2874  | -1.7613 |
| CEU | TBC1D3 | 36557531 | 2.4282  | 5.6286  | -1.6279 |
| CEU | TBC1D3 | 36562531 | 5.3455  | 8.0164  | -0.9865 |
| CEU | TBC1D3 | 36567531 | 8.8639  | 10.5749 | -0.4889 |
| CEU | TBC1D3 | 36572531 | 11.294  | 10.2337 | 0.3124  |
| CEU | TBC1D3 | 36577531 | 12.3133 | 9.7221  | 0.8008  |
| CEU | TBC1D3 | 36582531 | 10.7341 | 9.3809  | 0.4323  |
| CEU | TBC1D3 | 36587531 | 7.7182  | 8.6987  | -0.3359 |
| CEU | TBC1D3 | 36592531 | 11.3692 | 9.5515  | 0.571   |
| CEU | TBC1D3 | 36597531 | 14.2478 | 10.916  | 0.9241  |
| CEU | TBC1D3 | 36602531 | 10.7899 | 11.2571 | -0.1259 |
| CEU | TBC1D3 | 36607531 | 9.504   | 11.2571 | -0.4724 |
| CEU | TBC1D3 | 36612531 | 11.8872 | 9.8926  | 0.6065  |
| CEU | TBC1D3 | 36617531 | 10.759  | 8.5281  | 0.7784  |
| CEU | TBC1D3 | 36622531 | 7.9353  | 8.187   | -0.0912 |
| CEU | TBC1D3 | 36627531 | 8.5914  | 8.6987  | -0.0368 |
| CEU | TBC1D3 | 36632531 | 9.6408  | 11.2571 | -0.4355 |
| CEU | TBC1D3 | 36637531 | 10.8142 | 11.4277 | -0.163  |
| CEU | TBC1D3 | 36642531 | 11.934  | 9.7221  | 0.6835  |
| CEU | TBC1D3 | 36647531 | 12.6976 | 9.2104  | 1.1332  |
| CEU | TBC1D3 | 36652531 | 11.4407 | 11.2571 | 0.0495  |
| CEU | TBC1D3 | 36657531 | 9.202   | 9.5515  | -0.1098 |
| CEU | TBC1D3 | 36662531 | 7.256   | 5.9697  | 0.6208  |
| CEU | TBC1D3 | 36667531 | 7.8866  | 8.0164  | -0.0479 |
| CEU | TBC1D3 | 36672531 | 8.8279  | 9.8926  | -0.3237 |

## 2\_TajimasD\_data

|     |        |          |         |         |         |
|-----|--------|----------|---------|---------|---------|
| CEU | TBC1D3 | 36677531 | 11.5051 | 11.4277 | 0.0206  |
| CEU | TBC1D3 | 36682531 | 11.5328 | 11.5982 | -0.0171 |
| CEU | TBC1D3 | 36687531 | 6.6748  | 9.8926  | -0.9784 |
| CEU | TBC1D3 | 36692531 | 5.6431  | 9.3809  | -1.1941 |
| CEU | TBC1D3 | 36697531 | 4.7406  | 8.5281  | -1.3215 |
| CEU | TBC1D3 | 36702531 | 4.699   | 8.6987  | -1.3703 |
| CEU | TBC1D3 | 36707531 | 4.5009  | 8.3576  | -1.3709 |
| CEU | TBC1D3 | 36712531 | 2.8209  | 6.4814  | -1.6407 |
| CEU | TBC1D3 | 36717531 | 3.0383  | 6.4814  | -1.5433 |
| CEU | TBC1D3 | 36722531 | 4.7598  | 7.8459  | -1.1626 |
| CEU | TBC1D3 | 36727531 | 4.6625  | 7.5047  | -1.1151 |
| CEU | TBC1D3 | 36732531 | 4.1216  | 7.8459  | -1.403  |
| CEU | TBC1D3 | 36737531 | 4.9967  | 7.6753  | -1.0296 |
| CEU | TBC1D3 | 36742531 | 6.5323  | 7.3342  | -0.3213 |
| CEU | TBC1D3 | 36747531 | 5.2259  | 7.8459  | -0.987  |
| CEU | TBC1D3 | 36752531 | 1.8126  | 5.9697  | -2.0063 |
| CEU | TBC1D3 | 36757531 | 2.1523  | 4.9463  | -1.5934 |
| CEU | TBC1D3 | 36762531 | 6.0866  | 6.8225  | -0.3149 |
| CEU | TBC1D3 | 36767531 | 8.0153  | 8.5281  | -0.1789 |
| CEU | TBC1D3 | 36772531 | 7.9608  | 10.0632 | -0.6292 |
| CEU | TBC1D3 | 36777531 | 11.6677 | 11.7688 | -0.0261 |
| CEU | TBC1D3 | 36782531 | 13.3422 | 11.2571 | 0.5619  |
| CEU | TBC1D3 | 36787531 | 13.9024 | 12.6216 | 0.3099  |
| CEU | TBC1D3 | 36792531 | 16.2693 | 12.9627 | 0.7801  |
| CEU | TBC1D3 | 36797531 | 12.3766 | 9.8926  | 0.7553  |
| CEU | TBC1D3 | 36802531 | 6.2061  | 8.187   | -0.7176 |
| CEU | TBC1D3 | 36807531 | 5.7401  | 7.1636  | -0.5827 |
| CEU | TBC1D3 | 36812531 | 7.4282  | 8.8692  | -0.4849 |
| CEU | TBC1D3 | 36817531 | 7.1264  | 9.3809  | -0.7202 |
| CEU | TBC1D3 | 36822531 | 7.035   | 6.9931  | 0.0175  |
| CEU | TBC1D3 | 36827531 | 5.9192  | 6.3108  | -0.1798 |
| CEU | TBC1D3 | 36832531 | 4.6968  | 6.3108  | -0.741  |
| CEU | TBC1D3 | 36837531 | 4.9468  | 5.1169  | -0.0942 |
| CEU | TBC1D3 | 36842531 | 4.7363  | 4.7757  | -0.0232 |
| CEU | TBC1D3 | 36847531 | 4.1903  | 4.9463  | -0.4311 |
| CEU | TBC1D3 | 36852531 | 3.8209  | 4.6052  | -0.4762 |
| CEU | TBC1D3 | 36857531 | 4.0068  | 3.9229  | 0.0585  |
| CEU | TBC1D3 | 36862531 | 3.0165  | 3.5818  | -0.4261 |
| CEU | TBC1D3 | 36867531 | 1.7681  | 4.9463  | -1.8125 |
| CEU | TBC1D3 | 36872531 | 1.195   | 5.1169  | -2.1708 |
| CEU | TBC1D3 | 36877531 | 2.1563  | 5.2874  | -1.6836 |
| CEU | TBC1D3 | 36882531 | 3.1676  | 4.9463  | -1.0144 |
| CHB | TBC1D3 | 35882531 | 7.1525  | 8.6402  | -0.5114 |
| CHB | TBC1D3 | 35887531 | 7.6964  | 9.4872  | -0.5645 |
| CHB | TBC1D3 | 35892531 | 8.1041  | 7.2848  | 0.3293  |
| CHB | TBC1D3 | 35897531 | 8.2987  | 7.4543  | 0.3324  |
| CHB | TBC1D3 | 35902531 | 4.9789  | 6.7766  | -0.7717 |
| CHB | TBC1D3 | 35907531 | 2.7065  | 5.7601  | -1.5171 |
| CHB | TBC1D3 | 35912531 | 2.1978  | 4.4048  | -1.3888 |

## 2\_TajimasD\_data

|     |        |          |         |         |         |
|-----|--------|----------|---------|---------|---------|
| CHB | TBC1D3 | 35917531 | 2.9524  | 4.5742  | -0.9875 |
| CHB | TBC1D3 | 35922531 | 3.94    | 5.7601  | -0.9043 |
| CHB | TBC1D3 | 35927531 | 3.6632  | 5.2519  | -0.8568 |
| CHB | TBC1D3 | 35932531 | 3.5205  | 6.946   | -1.4379 |
| CHB | TBC1D3 | 35937531 | 2.5734  | 5.7601  | -1.5832 |
| CHB | TBC1D3 | 35942531 | 2.7451  | 5.2519  | -1.352  |
| CHB | TBC1D3 | 35947531 | 4.2541  | 6.6072  | -1.0335 |
| CHB | TBC1D3 | 35952531 | 6.0295  | 6.4378  | -0.1836 |
| CHB | TBC1D3 | 35957531 | 6.2065  | 5.7601  | 0.2218  |
| CHB | TBC1D3 | 35962531 | 4.2886  | 6.6072  | -1.0184 |
| CHB | TBC1D3 | 35967531 | 7.2216  | 9.4872  | -0.7142 |
| CHB | TBC1D3 | 35972531 | 6.2102  | 7.2848  | -0.432  |
| CHB | TBC1D3 | 35977531 | 2.9351  | 4.7436  | -1.0668 |
| CHB | TBC1D3 | 35982531 | 4.6406  | 5.9295  | -0.624  |
| CHB | TBC1D3 | 35987531 | 6.2113  | 7.4543  | -0.4893 |
| CHB | TBC1D3 | 35992531 | 6.1957  | 6.946   | -0.3149 |
| CHB | TBC1D3 | 35997531 | 6.2233  | 6.6072  | -0.1686 |
| CHB | TBC1D3 | 36002531 | 7.3531  | 7.2848  | 0.0275  |
| CHB | TBC1D3 | 36007531 | 4.5239  | 5.5907  | -0.5443 |
| CHB | TBC1D3 | 36012531 | 1.6716  | 3.7271  | -1.4933 |
| CHB | TBC1D3 | 36017531 | 5.0461  | 5.7601  | -0.3547 |
| CHB | TBC1D3 | 36022531 | 7.8079  | 8.4708  | -0.2321 |
| CHB | TBC1D3 | 36027531 | 9.2736  | 9.6567  | -0.1188 |
| CHB | TBC1D3 | 36032531 | 9.4832  | 8.979   | 0.1673  |
| CHB | TBC1D3 | 36037531 | 6.004   | 7.4543  | -0.5709 |
| CHB | TBC1D3 | 36042531 | 7.5555  | 9.4872  | -0.6089 |
| CHB | TBC1D3 | 36047531 | 8.7299  | 10.5037 | -0.5085 |
| CHB | TBC1D3 | 36052531 | 9.6291  | 10.6731 | -0.2949 |
| CHB | TBC1D3 | 36057531 | 14.9224 | 12.7061 | 0.5313  |
| CHB | TBC1D3 | 36062531 | 12.2894 | 10.5037 | 0.512   |
| CHB | TBC1D3 | 36067531 | 5.1156  | 7.9625  | -1.055  |
| CHB | TBC1D3 | 36072531 | 4.6856  | 9.9955  | -1.5945 |
| CHB | TBC1D3 | 36077531 | 7.6484  | 9.6567  | -0.6227 |
| CHB | TBC1D3 | 36082531 | 9.6931  | 10.6731 | -0.2768 |
| CHB | TBC1D3 | 36087531 | 8.4713  | 11.012  | -0.6969 |
| CHB | TBC1D3 | 36092531 | 6.5787  | 7.4543  | -0.3447 |
| CHB | TBC1D3 | 36097531 | 8.9159  | 7.4543  | 0.5753  |
| CHB | TBC1D3 | 36102531 | 9.2629  | 8.4708  | 0.2773  |
| CHB | TBC1D3 | 36107531 | 5.356   | 7.4543  | -0.8259 |
| CHB | TBC1D3 | 36112531 | 4.0788  | 7.9625  | -1.4392 |
| CHB | TBC1D3 | 36117531 | 9.9431  | 9.9955  | -0.0157 |
| CHB | TBC1D3 | 36122531 | 13.0565 | 9.8261  | 0.9856  |
| CHB | TBC1D3 | 36127531 | 8.4175  | 9.6567  | -0.3842 |
| CHB | TBC1D3 | 36132531 | 5.3418  | 9.3178  | -1.2745 |
| CHB | TBC1D3 | 36137531 | 6.5341  | 10.5037 | -1.1381 |
| CHB | TBC1D3 | 36142531 | 6.66    | 9.6567  | -0.9292 |
| CHB | TBC1D3 | 36147531 | 6.1498  | 7.7931  | -0.6211 |
| CHB | TBC1D3 | 36152531 | 8.084   | 8.979   | -0.2969 |
| CHB | TBC1D3 | 36157531 | 6.6427  | 8.6402  | -0.6866 |

## 2\_TajimasD\_data

|     |        |          |         |         |         |
|-----|--------|----------|---------|---------|---------|
| CHB | TBC1D3 | 36162531 | 8.7291  | 8.4708  | 0.0904  |
| CHB | TBC1D3 | 36167531 | 12.5585 | 11.3508 | 0.322   |
| CHB | TBC1D3 | 36172531 | 12.4089 | 13.7226 | -0.2928 |
| CHB | TBC1D3 | 36177531 | 11.4099 | 13.045  | -0.3823 |
| CHB | TBC1D3 | 36182531 | 6.143   | 10.3343 | -1.22   |
| CHB | TBC1D3 | 36187531 | 1.6558  | 7.1154  | -2.2421 |
| CHB | TBC1D3 | 36192531 | 4.3095  | 9.3178  | -1.6054 |
| CHB | TBC1D3 | 36197531 | 6.1439  | 10.1649 | -1.1887 |
| CHB | TBC1D3 | 36202531 | 5.6124  | 7.9625  | -0.8709 |
| CHB | TBC1D3 | 36207531 | 8.0442  | 11.1814 | -0.8483 |
| CHB | TBC1D3 | 36212531 | 8.5879  | 12.8755 | -1.0151 |
| CHB | TBC1D3 | 36217531 | 10.2294 | 11.1814 | -0.2574 |
| CHB | TBC1D3 | 36222531 | 12.1997 | 11.1814 | 0.2753  |
| CHB | TBC1D3 | 36227531 | 12.1746 | 11.5202 | 0.1721  |
| CHB | TBC1D3 | 36232531 | 10.7049 | 8.6402  | 0.7097  |
| CHB | TBC1D3 | 36237531 | 7.4525  | 6.6072  | 0.3713  |
| CHB | TBC1D3 | 36242531 | 10.9488 | 9.3178  | 0.5228  |
| CHB | TBC1D3 | 36247531 | 13.0849 | 9.8261  | 0.9943  |
| CHB | TBC1D3 | 36252531 | 5.6004  | 5.0825  | 0.2875  |
| CHB | TBC1D3 | 36257531 | 1.2559  | 2.7106  | -1.3784 |
| CHB | TBC1D3 | 36262531 | 1.3335  | 2.3718  | -1.096  |
| CHB | TBC1D3 | 36267531 | 1.2724  | 2.2024  | -1.0413 |
| CHB | TBC1D3 | 36272531 | 2.2623  | 2.7106  | -0.4248 |
| CHB | TBC1D3 | 36277531 | 3.1485  | 2.7106  | 0.4149  |
| CHB | TBC1D3 | 36282531 | 1.881   | 1.6942  | 0.2564  |
| CHB | TBC1D3 | 36287531 | 0.087   | 0.6777  | -1.5443 |
| CHB | TBC1D3 | 36292531 | 2.1999  | 2.3718  | -0.1815 |
| CHB | TBC1D3 | 36297531 | 4.1039  | 2.8801  | 1.1034  |
| CHB | TBC1D3 | 36302531 | 2.6071  | 2.033   | 0.6846  |
| CHB | TBC1D3 | 36307531 | 2.5682  | 2.033   | 0.6382  |
| CHB | TBC1D3 | 36312531 | 2.9113  | 2.7106  | 0.1902  |
| CHB | TBC1D3 | 36317531 | 1.3034  | 1.6942  | -0.5363 |
| CHB | TBC1D3 | 36322531 | 0.5233  | 0.8471  | -0.7302 |
| CHB | TBC1D3 | 36327531 | 0.1887  | 0.8471  | -1.4847 |
| CHB | TBC1D3 | 36332531 | 0.459   | 0.6777  | -0.5717 |
| CHB | TBC1D3 | 36337531 | 0.4493  | 0.5082  | -0.1849 |
| CHB | TBC1D3 | 36342531 | 0.0752  | 0.1694  | -0.5598 |
| CHB | TBC1D3 | 36347531 | 1.5861  | 1.1859  | 0.7144  |
| CHB | TBC1D3 | 36352531 | 2.242   | 2.5412  | -0.2988 |
| CHB | TBC1D3 | 36357531 | 2.6057  | 3.3883  | -0.6163 |
| CHB | TBC1D3 | 36362531 | 3.4     | 4.4048  | -0.6323 |
| CHB | TBC1D3 | 36367531 | 2.8508  | 4.066   | -0.8194 |
| CHB | TBC1D3 | 36372531 | 4.3465  | 4.066   | 0.1892  |
| CHB | TBC1D3 | 36377531 | 5.2354  | 4.4048  | 0.5227  |
| CHB | TBC1D3 | 36382531 | 3.2755  | 4.066   | -0.5331 |
| CHB | TBC1D3 | 36387531 | 1.5966  | 4.2354  | -1.7179 |
| CHB | TBC1D3 | 36392531 | 2.9338  | 5.2519  | -1.2502 |
| CHB | TBC1D3 | 36397531 | 4.7304  | 5.9295  | -0.5805 |
| CHB | TBC1D3 | 36402531 | 3.5433  | 5.5907  | -1.0446 |

## 2\_TajimasD\_data

|     |        |          |         |         |         |
|-----|--------|----------|---------|---------|---------|
| CHB | TBC1D3 | 36407531 | 1.6495  | 6.4378  | -2.153  |
| CHB | TBC1D3 | 36412531 | 1.34    | 6.7766  | -2.3337 |
| CHB | TBC1D3 | 36417531 | 1.4356  | 4.913   | -1.9891 |
| CHB | TBC1D3 | 36422531 | 0.8692  | 4.5742  | -2.256  |
| CHB | TBC1D3 | 36427531 | 0.6044  | 5.9295  | -2.578  |
| CHB | TBC1D3 | 36432531 | 1.4401  | 6.946   | -2.3112 |
| CHB | TBC1D3 | 36437531 | 1.663   | 8.4708  | -2.3832 |
| CHB | TBC1D3 | 36442531 | 1.1512  | 9.9955  | -2.6558 |
| CHB | TBC1D3 | 36447531 | 1.0801  | 9.8261  | -2.6684 |
| CHB | TBC1D3 | 36452531 | 1.2283  | 8.3013  | -2.5226 |
| CHB | TBC1D3 | 36457531 | 1.1114  | 6.4378  | -2.3949 |
| CHB | TBC1D3 | 36462531 | 2.2048  | 6.6072  | -1.9336 |
| CHB | TBC1D3 | 36467531 | 2.9589  | 7.2848  | -1.7389 |
| CHB | TBC1D3 | 36472531 | 3.2486  | 8.979   | -1.901  |
| CHB | TBC1D3 | 36477531 | 3.6969  | 9.1484  | -1.7774 |
| CHB | TBC1D3 | 36482531 | 2.0672  | 6.4378  | -1.9652 |
| CHB | TBC1D3 | 36487531 | 2.3832  | 7.2848  | -1.9703 |
| CHB | TBC1D3 | 36492531 | 3.4045  | 7.4543  | -1.5941 |
| CHB | TBC1D3 | 36497531 | 2.9802  | 7.7931  | -1.819  |
| CHB | TBC1D3 | 36502531 | 2.7619  | 7.6237  | -1.8748 |
| CHB | TBC1D3 | 36507531 | 3.2037  | 4.913   | -0.9777 |
| CHB | TBC1D3 | 36512531 | 3.6413  | 4.5742  | -0.5681 |
| CHB | TBC1D3 | 36517531 | 3.4291  | 5.2519  | -0.9831 |
| CHB | TBC1D3 | 36522531 | 4.8003  | 5.4213  | -0.3256 |
| CHB | TBC1D3 | 36527531 | 6.7165  | 7.1154  | -0.1638 |
| CHB | TBC1D3 | 36532531 | 6.4605  | 8.6402  | -0.7492 |
| CHB | TBC1D3 | 36537531 | 5.9564  | 7.9625  | -0.7434 |
| CHB | TBC1D3 | 36542531 | 10.3084 | 10.5037 | -0.056  |
| CHB | TBC1D3 | 36547531 | 9.1915  | 10.6731 | -0.4185 |
| CHB | TBC1D3 | 36552531 | 3.0152  | 6.946   | -1.65   |
| CHB | TBC1D3 | 36557531 | 3.8346  | 6.946   | -1.306  |
| CHB | TBC1D3 | 36562531 | 8.4447  | 8.8096  | -0.1232 |
| CHB | TBC1D3 | 36567531 | 11.3965 | 10.6731 | 0.2043  |
| CHB | TBC1D3 | 36572531 | 12.039  | 11.1814 | 0.2319  |
| CHB | TBC1D3 | 36577531 | 13.317  | 11.3508 | 0.5242  |
| CHB | TBC1D3 | 36582531 | 10.336  | 8.979   | 0.4502  |
| CHB | TBC1D3 | 36587531 | 6.4169  | 8.1319  | -0.6234 |
| CHB | TBC1D3 | 36592531 | 10.641  | 9.9955  | 0.1938  |
| CHB | TBC1D3 | 36597531 | 12.2144 | 10.8426 | 0.3818  |
| CHB | TBC1D3 | 36602531 | 7.7984  | 11.3508 | -0.9471 |
| CHB | TBC1D3 | 36607531 | 6.3303  | 9.6567  | -1.0314 |
| CHB | TBC1D3 | 36612531 | 10.2909 | 8.6402  | 0.5674  |
| CHB | TBC1D3 | 36617531 | 8.9081  | 9.6567  | -0.2321 |
| CHB | TBC1D3 | 36622531 | 5.4814  | 9.1484  | -1.1956 |
| CHB | TBC1D3 | 36627531 | 8.3343  | 8.1319  | 0.0736  |
| CHB | TBC1D3 | 36632531 | 9.4307  | 9.1484  | 0.092   |
| CHB | TBC1D3 | 36637531 | 10.5373 | 8.979   | 0.5169  |
| CHB | TBC1D3 | 36642531 | 9.8218  | 8.6402  | 0.4062  |
| CHB | TBC1D3 | 36647531 | 8.0657  | 9.9955  | -0.5795 |



## 2\_TajimasD\_data

|     |        |          |         |         |         |
|-----|--------|----------|---------|---------|---------|
| CHB | TBC1D3 | 36652531 | 8.4321  | 10.5037 | -0.5939 |
| CHB | TBC1D3 | 36657531 | 8.5313  | 8.979   | -0.1485 |
| CHB | TBC1D3 | 36662531 | 6.0853  | 7.6237  | -0.5932 |
| CHB | TBC1D3 | 36667531 | 5.5089  | 9.4872  | -1.254  |
| CHB | TBC1D3 | 36672531 | 7.1331  | 10.8426 | -1.0324 |
| CHB | TBC1D3 | 36677531 | 8.7875  | 11.5202 | -0.7185 |
| CHB | TBC1D3 | 36682531 | 7.371   | 11.6896 | -1.1199 |
| CHB | TBC1D3 | 36687531 | 4.9107  | 10.8426 | -1.6509 |
| CHB | TBC1D3 | 36692531 | 6.0063  | 10.3343 | -1.2598 |
| CHB | TBC1D3 | 36697531 | 4.7198  | 8.8096  | -1.3808 |
| CHB | TBC1D3 | 36702531 | 3.7735  | 7.7931  | -1.5192 |
| CHB | TBC1D3 | 36707531 | 3.727   | 7.9625  | -1.5695 |
| CHB | TBC1D3 | 36712531 | 2.5766  | 6.2684  | -1.7003 |
| CHB | TBC1D3 | 36717531 | 2.2414  | 5.0825  | -1.5773 |
| CHB | TBC1D3 | 36722531 | 3.7144  | 6.946   | -1.3565 |
| CHB | TBC1D3 | 36727531 | 4.2861  | 6.6072  | -1.0195 |
| CHB | TBC1D3 | 36732531 | 3.3567  | 6.4378  | -1.3854 |
| CHB | TBC1D3 | 36737531 | 3.9745  | 7.9625  | -1.4778 |
| CHB | TBC1D3 | 36742531 | 5.8894  | 8.3013  | -0.8602 |
| CHB | TBC1D3 | 36747531 | 5.2484  | 8.979   | -1.2376 |
| CHB | TBC1D3 | 36752531 | 2.5372  | 6.946   | -1.8506 |
| CHB | TBC1D3 | 36757531 | 2.4226  | 4.7436  | -1.3691 |
| CHB | TBC1D3 | 36762531 | 5.0356  | 6.2684  | -0.5678 |
| CHB | TBC1D3 | 36767531 | 6.4375  | 7.6237  | -0.4574 |
| CHB | TBC1D3 | 36772531 | 8.9408  | 9.6567  | -0.222  |
| CHB | TBC1D3 | 36777531 | 11.4957 | 13.2144 | -0.397  |
| CHB | TBC1D3 | 36782531 | 10.6388 | 12.7061 | -0.4956 |
| CHB | TBC1D3 | 36787531 | 12.7132 | 12.3673 | 0.0851  |
| CHB | TBC1D3 | 36792531 | 13.3257 | 13.2144 | 0.0257  |
| CHB | TBC1D3 | 36797531 | 7.173   | 12.5367 | -1.3022 |
| CHB | TBC1D3 | 36802531 | 2.4028  | 13.2144 | -2.4974 |
| CHB | TBC1D3 | 36807531 | 2.9739  | 10.3343 | -2.1425 |
| CHB | TBC1D3 | 36812531 | 4.4525  | 9.1484  | -1.531  |
| CHB | TBC1D3 | 36817531 | 4.6212  | 9.9955  | -1.6138 |
| CHB | TBC1D3 | 36822531 | 5.167   | 7.4543  | -0.9003 |
| CHB | TBC1D3 | 36827531 | 4.5994  | 6.0989  | -0.7078 |
| CHB | TBC1D3 | 36832531 | 2.8389  | 7.6237  | -1.8451 |
| CHB | TBC1D3 | 36837531 | 3.0173  | 7.7931  | -1.805  |
| CHB | TBC1D3 | 36842531 | 3.8824  | 7.2848  | -1.3677 |
| CHB | TBC1D3 | 36847531 | 4.1405  | 9.4872  | -1.6854 |
| CHB | TBC1D3 | 36852531 | 3.4051  | 9.4872  | -1.9172 |
| CHB | TBC1D3 | 36857531 | 2.6731  | 6.7766  | -1.7615 |
| CHB | TBC1D3 | 36862531 | 2.0141  | 5.2519  | -1.7462 |
| CHB | TBC1D3 | 36867531 | 1.2553  | 5.2519  | -2.1555 |
| CHB | TBC1D3 | 36872531 | 1.1719  | 5.0825  | -2.1711 |
| CHB | TBC1D3 | 36877531 | 1.8804  | 6.0989  | -1.9913 |
| CHB | TBC1D3 | 36882531 | 2.1955  | 6.4378  | -1.9075 |
| YRI | TBC1D3 | 35882531 | 8.4206  | 14.4534 | -1.2756 |
| YRI | TBC1D3 | 35887531 | 8.5091  | 12.7727 | -1.0136 |

## 2\_TajimasD\_data

|     |        |          |         |         |         |
|-----|--------|----------|---------|---------|---------|
| YRI | TBC1D3 | 35892531 | 6.3201  | 11.2602 | -1.3225 |
| YRI | TBC1D3 | 35897531 | 7.3905  | 12.2685 | -1.2046 |
| YRI | TBC1D3 | 35902531 | 7.1955  | 11.5963 | -1.146  |
| YRI | TBC1D3 | 35907531 | 5.6682  | 10.4199 | -1.3679 |
| YRI | TBC1D3 | 35912531 | 3.934   | 8.9073  | -1.6564 |
| YRI | TBC1D3 | 35917531 | 4.4004  | 8.9073  | -1.5011 |
| YRI | TBC1D3 | 35922531 | 5.12    | 10.924  | -1.5985 |
| YRI | TBC1D3 | 35927531 | 4.4259  | 11.0921 | -1.8099 |
| YRI | TBC1D3 | 35932531 | 5.5856  | 11.4282 | -1.5425 |
| YRI | TBC1D3 | 35937531 | 4.4511  | 10.0837 | -1.6718 |
| YRI | TBC1D3 | 35942531 | 4.7847  | 9.0754  | -1.4045 |
| YRI | TBC1D3 | 35947531 | 5.9286  | 10.5879 | -1.3214 |
| YRI | TBC1D3 | 35952531 | 6.0582  | 10.5879 | -1.2846 |
| YRI | TBC1D3 | 35957531 | 6.335   | 11.0921 | -1.2916 |
| YRI | TBC1D3 | 35962531 | 5.5138  | 11.7644 | -1.6058 |
| YRI | TBC1D3 | 35967531 | 9.6376  | 14.2853 | -0.9937 |
| YRI | TBC1D3 | 35972531 | 8.9242  | 12.1005 | -0.7946 |
| YRI | TBC1D3 | 35977531 | 4.9816  | 8.4031  | -1.2025 |
| YRI | TBC1D3 | 35982531 | 5.2845  | 9.4115  | -1.3062 |
| YRI | TBC1D3 | 35987531 | 7.5707  | 11.7644 | -1.0774 |
| YRI | TBC1D3 | 35992531 | 8.1991  | 11.0921 | -0.7855 |
| YRI | TBC1D3 | 35997531 | 7.0689  | 10.924  | -1.0618 |
| YRI | TBC1D3 | 36002531 | 9.8929  | 13.2769 | -0.7756 |
| YRI | TBC1D3 | 36007531 | 7.2065  | 10.924  | -1.0239 |
| YRI | TBC1D3 | 36012531 | 3.6098  | 10.5879 | -1.979  |
| YRI | TBC1D3 | 36017531 | 6.59    | 12.4366 | -1.4254 |
| YRI | TBC1D3 | 36022531 | 9.6895  | 14.6214 | -1.0314 |
| YRI | TBC1D3 | 36027531 | 12.2634 | 15.2937 | -0.6072 |
| YRI | TBC1D3 | 36032531 | 11.4314 | 13.2769 | -0.423  |
| YRI | TBC1D3 | 36037531 | 10.1938 | 12.4366 | -0.5468 |
| YRI | TBC1D3 | 36042531 | 13.956  | 14.1172 | -0.0349 |
| YRI | TBC1D3 | 36047531 | 13.9101 | 16.134  | -0.4234 |
| YRI | TBC1D3 | 36052531 | 12.012  | 16.134  | -0.7848 |
| YRI | TBC1D3 | 36057531 | 15.7454 | 16.9743 | -0.2229 |
| YRI | TBC1D3 | 36062531 | 13.4485 | 13.9492 | -0.1095 |
| YRI | TBC1D3 | 36067531 | 7.321   | 10.5879 | -0.9265 |
| YRI | TBC1D3 | 36072531 | 6.0992  | 12.4366 | -1.545  |
| YRI | TBC1D3 | 36077531 | 6.781   | 12.9408 | -1.4464 |
| YRI | TBC1D3 | 36082531 | 10.9086 | 14.1172 | -0.6938 |
| YRI | TBC1D3 | 36087531 | 10.9547 | 14.9575 | -0.8192 |
| YRI | TBC1D3 | 36092531 | 8.1622  | 11.9324 | -0.9557 |
| YRI | TBC1D3 | 36097531 | 11.0718 | 13.2769 | -0.5054 |
| YRI | TBC1D3 | 36102531 | 10.9242 | 15.1256 | -0.8507 |
| YRI | TBC1D3 | 36107531 | 6.8709  | 13.1089 | -1.447  |
| YRI | TBC1D3 | 36112531 | 7.1416  | 13.613  | -1.4484 |
| YRI | TBC1D3 | 36117531 | 12.4372 | 15.7978 | -0.6528 |
| YRI | TBC1D3 | 36122531 | 16.028  | 14.6214 | 0.2942  |
| YRI | TBC1D3 | 36127531 | 15.1717 | 14.7895 | 0.0791  |
| YRI | TBC1D3 | 36132531 | 11.9172 | 16.302  | -0.8266 |

## 2\_TajimasD\_data

|     |        |          |         |         |         |
|-----|--------|----------|---------|---------|---------|
| YRI | TBC1D3 | 36137531 | 12.1854 | 15.4617 | -0.6497 |
| YRI | TBC1D3 | 36142531 | 11.9058 | 16.6382 | -0.8749 |
| YRI | TBC1D3 | 36147531 | 9.6706  | 15.4617 | -1.1483 |
| YRI | TBC1D3 | 36152531 | 9.0639  | 15.9659 | -1.3273 |
| YRI | TBC1D3 | 36157531 | 10.8262 | 18.4868 | -1.2802 |
| YRI | TBC1D3 | 36162531 | 16.1437 | 16.134  | 0.0018  |
| YRI | TBC1D3 | 36167531 | 21.2529 | 17.6465 | 0.6302  |
| YRI | TBC1D3 | 36172531 | 24.3293 | 19.9994 | 0.6709  |
| YRI | TBC1D3 | 36177531 | 22.4344 | 17.4785 | 0.874   |
| YRI | TBC1D3 | 36182531 | 19.7048 | 16.4701 | 0.6039  |
| YRI | TBC1D3 | 36187531 | 13.3593 | 14.1172 | -0.1639 |
| YRI | TBC1D3 | 36192531 | 10.6929 | 15.2937 | -0.9219 |
| YRI | TBC1D3 | 36197531 | 12.0867 | 16.8062 | -0.8642 |
| YRI | TBC1D3 | 36202531 | 9.7948  | 17.4785 | -1.3551 |
| YRI | TBC1D3 | 36207531 | 10.4465 | 19.1591 | -1.4069 |
| YRI | TBC1D3 | 36212531 | 10.2572 | 17.3104 | -1.2554 |
| YRI | TBC1D3 | 36217531 | 9.7244  | 17.4785 | -1.3675 |
| YRI | TBC1D3 | 36222531 | 12.0884 | 16.134  | -0.7703 |
| YRI | TBC1D3 | 36227531 | 14.155  | 15.2937 | -0.2282 |
| YRI | TBC1D3 | 36232531 | 11.7418 | 15.9659 | -0.8123 |
| YRI | TBC1D3 | 36237531 | 9.8716  | 17.1423 | -1.3063 |
| YRI | TBC1D3 | 36242531 | 15.7313 | 20.8397 | -0.7607 |
| YRI | TBC1D3 | 36247531 | 15.6489 | 18.3188 | -0.4501 |
| YRI | TBC1D3 | 36252531 | 6.1674  | 8.5712  | -0.8296 |
| YRI | TBC1D3 | 36257531 | 2.7968  | 4.8738  | -1.1923 |
| YRI | TBC1D3 | 36262531 | 2.7138  | 4.0335  | -0.8929 |
| YRI | TBC1D3 | 36267531 | 2.3505  | 3.6974  | -0.9817 |
| YRI | TBC1D3 | 36272531 | 3.2807  | 5.7141  | -1.2134 |
| YRI | TBC1D3 | 36277531 | 2.8224  | 6.0502  | -1.5294 |
| YRI | TBC1D3 | 36282531 | 1.4279  | 3.5293  | -1.5933 |
| YRI | TBC1D3 | 36287531 | 0.4309  | 0.6722  | -0.6317 |
| YRI | TBC1D3 | 36292531 | 2.4334  | 2.5209  | -0.0876 |
| YRI | TBC1D3 | 36297531 | 3.9126  | 5.2099  | -0.7022 |
| YRI | TBC1D3 | 36302531 | 3.3157  | 6.5544  | -1.4279 |
| YRI | TBC1D3 | 36307531 | 3.3488  | 4.5377  | -0.7265 |
| YRI | TBC1D3 | 36312531 | 3.0585  | 3.6974  | -0.4657 |
| YRI | TBC1D3 | 36317531 | 1.5843  | 3.0251  | -1.2429 |
| YRI | TBC1D3 | 36322531 | 1.8596  | 2.5209  | -0.6623 |
| YRI | TBC1D3 | 36327531 | 1.409   | 2.1848  | -0.8711 |
| YRI | TBC1D3 | 36332531 | 0.5794  | 0.6722  | -0.2429 |
| YRI | TBC1D3 | 36337531 | 0.5702  | 0.5042  | 0.2074  |
| YRI | TBC1D3 | 36342531 | 0.2336  | 0.1681  | 0.3894  |
| YRI | TBC1D3 | 36347531 | 2.0508  | 2.8571  | -0.7292 |
| YRI | TBC1D3 | 36352531 | 3.1595  | 4.7057  | -0.9153 |
| YRI | TBC1D3 | 36357531 | 4.1299  | 5.2099  | -0.5846 |
| YRI | TBC1D3 | 36362531 | 4.7298  | 6.2183  | -0.6881 |
| YRI | TBC1D3 | 36367531 | 3.8514  | 5.5461  | -0.8678 |
| YRI | TBC1D3 | 36372531 | 4.6696  | 5.8822  | -0.5892 |
| YRI | TBC1D3 | 36377531 | 5.1822  | 6.7225  | -0.6637 |

## 2\_TajimasD\_data

|     |        |          |         |         |         |
|-----|--------|----------|---------|---------|---------|
| YRI | TBC1D3 | 36382531 | 4.1655  | 6.7225  | -1.1018 |
| YRI | TBC1D3 | 36387531 | 3.8397  | 7.5628  | -1.4413 |
| YRI | TBC1D3 | 36392531 | 5.5732  | 9.9157  | -1.3093 |
| YRI | TBC1D3 | 36397531 | 6.8802  | 9.5795  | -0.8404 |
| YRI | TBC1D3 | 36402531 | 6.7961  | 8.5712  | -0.6126 |
| YRI | TBC1D3 | 36407531 | 7.6401  | 11.2602 | -0.9691 |
| YRI | TBC1D3 | 36412531 | 8.1595  | 12.2685 | -1.0147 |
| YRI | TBC1D3 | 36417531 | 7.6986  | 11.7644 | -1.0445 |
| YRI | TBC1D3 | 36422531 | 8.0299  | 11.0921 | -0.8314 |
| YRI | TBC1D3 | 36427531 | 8.4356  | 9.9157  | -0.4463 |
| YRI | TBC1D3 | 36432531 | 11.2802 | 13.9492 | -0.5837 |
| YRI | TBC1D3 | 36437531 | 14.8937 | 14.9575 | -0.0131 |
| YRI | TBC1D3 | 36442531 | 17.8273 | 12.7727 | 1.2017  |
| YRI | TBC1D3 | 36447531 | 16.0806 | 14.9575 | 0.2299  |
| YRI | TBC1D3 | 36452531 | 12.8201 | 16.134  | -0.631  |
| YRI | TBC1D3 | 36457531 | 10.4763 | 14.2853 | -0.8144 |
| YRI | TBC1D3 | 36462531 | 8.4112  | 12.1005 | -0.923  |
| YRI | TBC1D3 | 36467531 | 8.2709  | 12.2685 | -0.9872 |
| YRI | TBC1D3 | 36472531 | 9.5506  | 15.4617 | -1.1721 |
| YRI | TBC1D3 | 36477531 | 11.7976 | 14.9575 | -0.6467 |
| YRI | TBC1D3 | 36482531 | 7.7392  | 9.7476  | -0.6152 |
| YRI | TBC1D3 | 36487531 | 7.7555  | 11.0921 | -0.9059 |
| YRI | TBC1D3 | 36492531 | 8.9749  | 12.6047 | -0.8738 |
| YRI | TBC1D3 | 36497531 | 7.587   | 12.4366 | -1.1823 |
| YRI | TBC1D3 | 36502531 | 7.8173  | 13.1089 | -1.2275 |
| YRI | TBC1D3 | 36507531 | 6.9516  | 11.5963 | -1.2095 |
| YRI | TBC1D3 | 36512531 | 7.1752  | 11.5963 | -1.1513 |
| YRI | TBC1D3 | 36517531 | 5.5935  | 11.0921 | -1.4929 |
| YRI | TBC1D3 | 36522531 | 6.1517  | 10.924  | -1.3144 |
| YRI | TBC1D3 | 36527531 | 8.9213  | 11.4282 | -0.6618 |
| YRI | TBC1D3 | 36532531 | 8.9115  | 12.1005 | -0.7978 |
| YRI | TBC1D3 | 36537531 | 8.1494  | 11.7644 | -0.9287 |
| YRI | TBC1D3 | 36542531 | 13.4869 | 17.1423 | -0.6568 |
| YRI | TBC1D3 | 36547531 | 12.3481 | 15.9659 | -0.6957 |
| YRI | TBC1D3 | 36552531 | 4.6076  | 7.2267  | -1.0569 |
| YRI | TBC1D3 | 36557531 | 7.2359  | 10.4199 | -0.9166 |
| YRI | TBC1D3 | 36562531 | 13.8909 | 15.6298 | -0.3413 |
| YRI | TBC1D3 | 36567531 | 17.4222 | 17.4785 | -0.0099 |
| YRI | TBC1D3 | 36572531 | 17.7766 | 16.8062 | 0.1777  |
| YRI | TBC1D3 | 36577531 | 17.1899 | 17.1423 | 0.0086  |
| YRI | TBC1D3 | 36582531 | 13.5613 | 17.6465 | -0.7139 |
| YRI | TBC1D3 | 36587531 | 10.7795 | 16.6382 | -1.0831 |
| YRI | TBC1D3 | 36592531 | 13.055  | 18.1507 | -0.8667 |
| YRI | TBC1D3 | 36597531 | 16.6885 | 18.1507 | -0.2487 |
| YRI | TBC1D3 | 36602531 | 18.8551 | 16.9743 | 0.3411  |
| YRI | TBC1D3 | 36607531 | 15.5742 | 16.302  | -0.1372 |
| YRI | TBC1D3 | 36612531 | 14.5149 | 15.6298 | -0.2188 |
| YRI | TBC1D3 | 36617531 | 14.9659 | 16.302  | -0.2519 |
| YRI | TBC1D3 | 36622531 | 12.2759 | 16.6382 | -0.8065 |

## 2\_TajimasD\_data

|     |        |          |         |         |         |
|-----|--------|----------|---------|---------|---------|
| YRI | TBC1D3 | 36627531 | 10.9862 | 15.9659 | -0.9577 |
| YRI | TBC1D3 | 36632531 | 8.8093  | 13.613  | -1.0752 |
| YRI | TBC1D3 | 36637531 | 7.1822  | 12.6047 | -1.3053 |
| YRI | TBC1D3 | 36642531 | 11.4129 | 18.4868 | -1.1821 |
| YRI | TBC1D3 | 36647531 | 15.6759 | 18.4868 | -0.4697 |
| YRI | TBC1D3 | 36652531 | 17.0028 | 13.7811 | 0.7127  |
| YRI | TBC1D3 | 36657531 | 14.3161 | 15.6298 | -0.2578 |
| YRI | TBC1D3 | 36662531 | 9.1978  | 14.1172 | -1.0637 |
| YRI | TBC1D3 | 36667531 | 11.9287 | 12.9408 | -0.2377 |
| YRI | TBC1D3 | 36672531 | 13.0858 | 15.7978 | -0.5268 |
| YRI | TBC1D3 | 36677531 | 14.0464 | 18.823  | -0.7845 |
| YRI | TBC1D3 | 36682531 | 15.6368 | 19.9994 | -0.6759 |
| YRI | TBC1D3 | 36687531 | 12.8319 | 15.9659 | -0.6027 |
| YRI | TBC1D3 | 36692531 | 11.9557 | 13.613  | -0.3709 |
| YRI | TBC1D3 | 36697531 | 10.111  | 13.613  | -0.7838 |
| YRI | TBC1D3 | 36702531 | 9.402   | 13.7811 | -0.9688 |
| YRI | TBC1D3 | 36707531 | 10.0817 | 14.2853 | -0.8988 |
| YRI | TBC1D3 | 36712531 | 8.3609  | 12.6047 | -1.0216 |
| YRI | TBC1D3 | 36717531 | 5.6837  | 9.7476  | -1.2449 |
| YRI | TBC1D3 | 36722531 | 6.904   | 10.0837 | -0.9438 |
| YRI | TBC1D3 | 36727531 | 8.9573  | 10.756  | -0.5026 |
| YRI | TBC1D3 | 36732531 | 9.7484  | 10.5879 | -0.2381 |
| YRI | TBC1D3 | 36737531 | 10.0535 | 11.7644 | -0.4395 |
| YRI | TBC1D3 | 36742531 | 11.2903 | 12.1005 | -0.2027 |
| YRI | TBC1D3 | 36747531 | 11.4667 | 12.2685 | -0.198  |
| YRI | TBC1D3 | 36752531 | 6.2217  | 9.2434  | -0.9725 |
| YRI | TBC1D3 | 36757531 | 3.5627  | 8.235   | -1.6729 |
| YRI | TBC1D3 | 36762531 | 6.7364  | 10.2518 | -1.0275 |
| YRI | TBC1D3 | 36767531 | 7.761   | 10.5879 | -0.8017 |
| YRI | TBC1D3 | 36772531 | 9.0252  | 12.2685 | -0.8009 |
| YRI | TBC1D3 | 36777531 | 13.538  | 15.1256 | -0.3215 |
| YRI | TBC1D3 | 36782531 | 16.0235 | 15.1256 | 0.1818  |
| YRI | TBC1D3 | 36787531 | 18.6044 | 15.9659 | 0.5074  |
| YRI | TBC1D3 | 36792531 | 19.1726 | 17.4785 | 0.2988  |
| YRI | TBC1D3 | 36797531 | 19.7271 | 16.6382 | 0.5711  |
| YRI | TBC1D3 | 36802531 | 18.1829 | 17.4785 | 0.1242  |
| YRI | TBC1D3 | 36807531 | 10.9794 | 14.7895 | -0.7882 |
| YRI | TBC1D3 | 36812531 | 7.3049  | 11.5963 | -1.1175 |
| YRI | TBC1D3 | 36817531 | 6.2401  | 12.6047 | -1.5321 |
| YRI | TBC1D3 | 36822531 | 6.5354  | 11.0921 | -1.2372 |
| YRI | TBC1D3 | 36827531 | 7.6835  | 8.9073  | -0.4076 |
| YRI | TBC1D3 | 36832531 | 8.2188  | 9.0754  | -0.2804 |
| YRI | TBC1D3 | 36837531 | 7.8502  | 7.7309  | 0.0453  |
| YRI | TBC1D3 | 36842531 | 7.7279  | 8.5712  | -0.291  |
| YRI | TBC1D3 | 36847531 | 9.0691  | 11.9324 | -0.7258 |
| YRI | TBC1D3 | 36852531 | 8.6424  | 12.1005 | -0.8651 |
| YRI | TBC1D3 | 36857531 | 6.6899  | 12.1005 | -1.3536 |
| YRI | TBC1D3 | 36862531 | 5.0546  | 12.7727 | -1.8349 |
| YRI | TBC1D3 | 36867531 | 3.7086  | 11.5963 | -2.054  |

## 2\_TajimasD\_data

|     |        |          |         |        |         |
|-----|--------|----------|---------|--------|---------|
| YRI | TBC1D3 | 36872531 | 2.5061  | 7.7309 | -1.9824 |
| YRI | TBC1D3 | 36877531 | 3.9789  | 7.8989 | -1.4583 |
| YRI | TBC1D3 | 36882531 | 4.9725  | 8.7392 | -1.2768 |
| CEU | TBC1D3 | 37428805 | 7.9986  | 7.3342 | 0.2662  |
| CEU | TBC1D3 | 37433805 | 8.0033  | 7.1636 | 0.3437  |
| CEU | TBC1D3 | 37438805 | 10.1051 | 9.2104 | 0.2907  |
| CEU | TBC1D3 | 37443805 | 7.1894  | 7.3342 | -0.058  |
| CEU | TBC1D3 | 37448805 | 5.9984  | 5.6286 | 0.1881  |
| CEU | TBC1D3 | 37453805 | 7.3063  | 6.4814 | 0.3697  |
| CEU | TBC1D3 | 37458805 | 6.1556  | 6.9931 | -0.3504 |
| CEU | TBC1D3 | 37463805 | 6.402   | 6.9931 | -0.2473 |
| CEU | TBC1D3 | 37468805 | 6.2776  | 6.6519 | -0.1639 |
| CEU | TBC1D3 | 37473805 | 6.2741  | 5.9697 | 0.1469  |
| CEU | TBC1D3 | 37478805 | 6.5222  | 6.3108 | 0.0971  |
| CEU | TBC1D3 | 37483805 | 5.718   | 7.8459 | -0.8016 |
| CEU | TBC1D3 | 37488805 | 5.5244  | 8.5281 | -1.048  |
| CEU | TBC1D3 | 37493805 | 6.3449  | 8.0164 | -0.6174 |
| CEU | TBC1D3 | 37498805 | 8.4704  | 7.8459 | 0.2353  |
| CEU | TBC1D3 | 37503805 | 9.6689  | 8.3576 | 0.4661  |
| CEU | TBC1D3 | 37508805 | 7.9361  | 7.5047 | 0.1693  |
| CEU | TBC1D3 | 37513805 | 8.3791  | 8.187  | 0.0696  |
| CEU | TBC1D3 | 37518805 | 6.6405  | 8.187  | -0.5603 |
| CEU | TBC1D3 | 37523805 | 3.9534  | 6.1402 | -1.029  |
| CEU | TBC1D3 | 37528805 | 6.6411  | 6.9931 | -0.1473 |
| CEU | TBC1D3 | 37533805 | 7.7998  | 7.6753 | 0.0479  |
| CEU | TBC1D3 | 37538805 | 7.0273  | 8.3576 | -0.4729 |
| CEU | TBC1D3 | 37543805 | 5.8377  | 8.3576 | -0.8957 |
| CEU | TBC1D3 | 37548805 | 7.2742  | 7.3342 | -0.024  |
| CEU | TBC1D3 | 37553805 | 8.6054  | 8.5281 | 0.027   |
| CEU | TBC1D3 | 37558805 | 4.2513  | 6.8225 | -1.1002 |
| CEU | TBC1D3 | 37563805 | 1.0724  | 2.729  | -1.5658 |
| CEU | TBC1D3 | 37568805 | 5.7308  | 5.1169 | 0.3398  |
| CEU | TBC1D3 | 37573805 | 9.7273  | 8.3576 | 0.4869  |
| CEU | TBC1D3 | 37578805 | 6.8204  | 7.3342 | -0.2059 |
| CEU | TBC1D3 | 37583805 | 5.5158  | 6.3108 | -0.365  |
| CEU | TBC1D3 | 37588805 | 5.3853  | 6.4814 | -0.4913 |
| CEU | TBC1D3 | 37593805 | 5.1004  | 7.1636 | -0.8446 |
| CEU | TBC1D3 | 37598805 | 6.086   | 7.3342 | -0.5001 |
| CEU | TBC1D3 | 37603805 | 6.8602  | 6.8225 | 0.0161  |
| CEU | TBC1D3 | 37608805 | 6.8501  | 5.6286 | 0.6213  |
| CEU | TBC1D3 | 37613805 | 5.8835  | 5.7991 | 0.0418  |
| CEU | TBC1D3 | 37618805 | 7.5677  | 7.5047 | 0.0247  |
| CEU | TBC1D3 | 37623805 | 9.8662  | 8.5281 | 0.4669  |
| CEU | TBC1D3 | 37628805 | 6.711   | 7.3342 | -0.2497 |
| CEU | TBC1D3 | 37633805 | 6.5007  | 8.3576 | -0.6601 |
| CEU | TBC1D3 | 37638805 | 7.1709  | 8.0164 | -0.3123 |
| CEU | TBC1D3 | 37643805 | 8.24    | 8.6987 | -0.1571 |
| CEU | TBC1D3 | 37648805 | 9.9151  | 9.7221 | 0.0596  |
| CEU | TBC1D3 | 37653805 | 6.6384  | 6.8225 | -0.0788 |

## 2\_TajimasD\_data

|     |        |          |         |         |         |
|-----|--------|----------|---------|---------|---------|
| CEU | TBC1D3 | 37658805 | 5.2033  | 5.6286  | -0.2163 |
| CEU | TBC1D3 | 37663805 | 4.6079  | 4.7757  | -0.0987 |
| CEU | TBC1D3 | 37668805 | 6.4065  | 5.7991  | 0.3008  |
| CEU | TBC1D3 | 37673805 | 8.462   | 7.3342  | 0.4519  |
| CEU | TBC1D3 | 37678805 | 6.3851  | 6.3108  | 0.0341  |
| CEU | TBC1D3 | 37683805 | 4.6685  | 4.6052  | 0.0384  |
| CEU | TBC1D3 | 37688805 | 2.7757  | 3.9229  | -0.8001 |
| CEU | TBC1D3 | 37693805 | 4.7877  | 5.2874  | -0.2687 |
| CEU | TBC1D3 | 37698805 | 8.2443  | 7.3342  | 0.3646  |
| CEU | TBC1D3 | 37703805 | 6.4395  | 5.9697  | 0.2267  |
| CEU | TBC1D3 | 37708805 | 4.9854  | 5.1169  | -0.0728 |
| CEU | TBC1D3 | 37713805 | 5.7576  | 6.3108  | -0.254  |
| CEU | TBC1D3 | 37718805 | 4.4537  | 5.6286  | -0.5976 |
| CEU | TBC1D3 | 37723805 | 3.5108  | 5.1169  | -0.889  |
| CEU | TBC1D3 | 37728805 | 3.3599  | 4.9463  | -0.9047 |
| CEU | TBC1D3 | 37733805 | 3.6724  | 6.4814  | -1.259  |
| CEU | TBC1D3 | 37738805 | 6.571   | 8.0164  | -0.5339 |
| CEU | TBC1D3 | 37743805 | 7.3638  | 7.8459  | -0.1816 |
| CEU | TBC1D3 | 37748805 | 5.9043  | 9.3809  | -1.1106 |
| CEU | TBC1D3 | 37753805 | 3.6601  | 7.5047  | -1.5084 |
| CEU | TBC1D3 | 37758805 | 1.898   | 4.4346  | -1.5915 |
| CEU | TBC1D3 | 37763805 | 2.035   | 4.0935  | -1.3842 |
| CEU | TBC1D3 | 37768805 | 4.1775  | 6.1402  | -0.9236 |
| CEU | TBC1D3 | 37773805 | 4.3927  | 7.1636  | -1.1343 |
| CEU | TBC1D3 | 37778805 | 4.0598  | 6.9931  | -1.2273 |
| CEU | TBC1D3 | 37783805 | 3.921   | 7.3342  | -1.3676 |
| CEU | TBC1D3 | 37788805 | 3.0936  | 6.4814  | -1.5185 |
| CEU | TBC1D3 | 37793805 | 3.0336  | 6.3108  | -1.5046 |
| CEU | TBC1D3 | 37798805 | 1.8827  | 6.8225  | -2.1137 |
| CEU | TBC1D3 | 37803805 | 2.2554  | 6.6519  | -1.9249 |
| CEU | TBC1D3 | 37808805 | 3.5655  | 7.5047  | -1.5456 |
| CEU | TBC1D3 | 37813805 | 5.06    | 9.0398  | -1.3158 |
| CEU | TBC1D3 | 37818805 | 5.2521  | 9.2104  | -1.2862 |
| CEU | TBC1D3 | 37823805 | 5.7357  | 8.187   | -0.8881 |
| CEU | TBC1D3 | 37828805 | 13.3628 | 9.8926  | 1.0552  |
| CEU | TBC1D3 | 37833805 | 17.477  | 11.2571 | 1.676   |
| CEU | TBC1D3 | 37838805 | 9.6817  | 7.6753  | 0.7712  |
| CEU | TBC1D3 | 37843805 | 5.4853  | 6.9931  | -0.6309 |
| CEU | TBC1D3 | 37848805 | 5.1907  | 6.3108  | -0.5143 |
| CEU | TBC1D3 | 37853805 | 3.9406  | 4.4346  | -0.31   |
| CEU | TBC1D3 | 37858805 | 2.5341  | 5.1169  | -1.4296 |
| CEU | TBC1D3 | 37863805 | 1.8365  | 4.9463  | -1.7735 |
| CEU | TBC1D3 | 37868805 | 2.1451  | 4.6052  | -1.4936 |
| CEU | TBC1D3 | 37873805 | 2.8654  | 6.1402  | -1.541  |
| CEU | TBC1D3 | 37878805 | 3.5411  | 6.3108  | -1.2716 |
| CEU | TBC1D3 | 37883805 | 3.0977  | 5.458   | -1.2339 |
| CEU | TBC1D3 | 37888805 | 2.7025  | 6.1402  | -1.6177 |
| CEU | TBC1D3 | 37893805 | 2.5607  | 6.3108  | -1.7217 |
| CEU | TBC1D3 | 37898805 | 2.732   | 4.9463  | -1.2628 |

## 2\_TajimasD\_data

|     |        |          |         |         |         |
|-----|--------|----------|---------|---------|---------|
| CEU | TBC1D3 | 37903805 | 2.6127  | 4.6052  | -1.2097 |
| CEU | TBC1D3 | 37908805 | 2.8248  | 4.7757  | -1.1474 |
| CEU | TBC1D3 | 37913805 | 2.8054  | 4.4346  | -1.0222 |
| CEU | TBC1D3 | 37918805 | 2.3078  | 4.2641  | -1.2699 |
| CEU | TBC1D3 | 37923805 | 2.1626  | 4.6052  | -1.483  |
| CEU | TBC1D3 | 37928805 | 1.9487  | 5.458   | -1.8346 |
| CEU | TBC1D3 | 37933805 | 1.9693  | 5.458   | -1.8238 |
| CEU | TBC1D3 | 37938805 | 2.5296  | 5.9697  | -1.6602 |
| CEU | TBC1D3 | 37943805 | 2.3941  | 6.9931  | -1.9243 |
| CEU | TBC1D3 | 37948805 | 1.9557  | 6.8225  | -2.0825 |
| CEU | TBC1D3 | 37953805 | 2.892   | 7.1636  | -1.7486 |
| CEU | TBC1D3 | 37958805 | 3.3989  | 6.4814  | -1.3816 |
| CEU | TBC1D3 | 37963805 | 2.5863  | 5.7991  | -1.5913 |
| CEU | TBC1D3 | 37968805 | 2.2018  | 6.3108  | -1.8865 |
| CEU | TBC1D3 | 37973805 | 3.0985  | 6.4814  | -1.5163 |
| CEU | TBC1D3 | 37978805 | 3.8815  | 8.187   | -1.5598 |
| CEU | TBC1D3 | 37983805 | 3.6953  | 9.3809  | -1.8163 |
| CEU | TBC1D3 | 37988805 | 2.3995  | 6.4814  | -1.8296 |
| CEU | TBC1D3 | 37993805 | 1.2779  | 4.0935  | -1.8933 |
| CEU | TBC1D3 | 37998805 | 1.9307  | 5.7991  | -1.916  |
| CEU | TBC1D3 | 38003805 | 5.4187  | 7.8459  | -0.9144 |
| CEU | TBC1D3 | 38008805 | 5.0289  | 9.5515  | -1.4208 |
| CEU | TBC1D3 | 38013805 | 2.2298  | 9.8926  | -2.33   |
| CEU | TBC1D3 | 38018805 | 3.5135  | 8.0164  | -1.6632 |
| CEU | TBC1D3 | 38023805 | 8.4348  | 8.187   | 0.0898  |
| CEU | TBC1D3 | 38028805 | 14.563  | 10.5749 | 1.1395  |
| CEU | TBC1D3 | 38033805 | 13.8895 | 9.8926  | 1.2153  |
| CEU | TBC1D3 | 38038805 | 9.8947  | 7.8459  | 0.7718  |
| CEU | TBC1D3 | 38043805 | 6.6079  | 7.1636  | -0.2275 |
| CEU | TBC1D3 | 38048805 | 5.4354  | 5.7991  | -0.1801 |
| CEU | TBC1D3 | 38053805 | 7.4399  | 5.6286  | 0.9213  |
| CEU | TBC1D3 | 38058805 | 8.5265  | 5.9697  | 1.2339  |
| CEU | TBC1D3 | 38063805 | 12.0839 | 8.8692  | 1.0818  |
| CEU | TBC1D3 | 38068805 | 14.8732 | 10.916  | 1.0975  |
| CEU | TBC1D3 | 38073805 | 13.4302 | 10.4043 | 0.8778  |
| CEU | TBC1D3 | 38078805 | 8.12    | 7.5047  | 0.2414  |
| CEU | TBC1D3 | 38083805 | 6.054   | 5.1169  | 0.5187  |
| CEU | TBC1D3 | 38088805 | 10.9225 | 8.0164  | 1.0734  |
| CEU | TBC1D3 | 38093805 | 11.1373 | 9.0398  | 0.6935  |
| CEU | TBC1D3 | 38098805 | 9.3873  | 7.8459  | 0.5807  |
| CEU | TBC1D3 | 38103805 | 11.2298 | 8.3576  | 1.021   |
| CEU | TBC1D3 | 38108805 | 21.0895 | 12.2805 | 2.1871  |
| CEU | TBC1D3 | 38113805 | 23.6676 | 13.9861 | 2.1253  |
| CEU | TBC1D3 | 38118805 | 18.0139 | 12.4511 | 1.3632  |
| CEU | TBC1D3 | 38123805 | 18.6639 | 11.9394 | 1.7145  |
| CEU | TBC1D3 | 38128805 | 15.6515 | 10.5749 | 1.4505  |
| CEU | TBC1D3 | 38133805 | 10.7749 | 8.6987  | 0.7113  |
| CEU | TBC1D3 | 38138805 | 10.5582 | 9.7221  | 0.2584  |
| CEU | TBC1D3 | 38143805 | 16.3356 | 12.2805 | 1.0068  |



## 2\_TajimasD\_data

|     |        |          |         |         |         |
|-----|--------|----------|---------|---------|---------|
| CEU | TBC1D3 | 38148805 | 19.476  | 11.5982 | 2.064   |
| CEU | TBC1D3 | 38153805 | 16.8196 | 10.5749 | 1.7842  |
| CEU | TBC1D3 | 38158805 | 16.5028 | 9.8926  | 2.01    |
| CEU | TBC1D3 | 38163805 | 20.2742 | 11.7688 | 2.1981  |
| CEU | TBC1D3 | 38168805 | 18.0441 | 12.9627 | 1.1988  |
| CEU | TBC1D3 | 38173805 | 13.8439 | 10.5749 | 0.934   |
| CEU | TBC1D3 | 38178805 | 13.5226 | 9.3809  | 1.3231  |
| CEU | TBC1D3 | 38183805 | 10.3298 | 8.8692  | 0.4915  |
| CEU | TBC1D3 | 38188805 | 7.2921  | 6.1402  | 0.5421  |
| CEU | TBC1D3 | 38193805 | 7.9489  | 6.3108  | 0.7521  |
| CEU | TBC1D3 | 38198805 | 6.0274  | 7.3342  | -0.5236 |
| CEU | TBC1D3 | 38203805 | 3.8141  | 5.7991  | -0.9832 |
| CEU | TBC1D3 | 38208805 | 6.348   | 6.8225  | -0.203  |
| CEU | TBC1D3 | 38213805 | 11.8169 | 8.5281  | 1.1475  |
| CEU | TBC1D3 | 38218805 | 12.7036 | 8.187   | 1.6363  |
| CEU | TBC1D3 | 38223805 | 7.2843  | 5.7991  | 0.7356  |
| CEU | TBC1D3 | 38228805 | 3.4799  | 4.0935  | -0.4126 |
| CEU | TBC1D3 | 38233805 | 2.1218  | 3.7524  | -1.1813 |
| CEU | TBC1D3 | 38238805 | 2.4092  | 6.1402  | -1.7557 |
| CEU | TBC1D3 | 38243805 | 4.0606  | 8.0164  | -1.4611 |
| CEU | TBC1D3 | 38248805 | 5.6291  | 7.5047  | -0.7359 |
| CEU | TBC1D3 | 38253805 | 6.5879  | 7.6753  | -0.418  |
| CEU | TBC1D3 | 38258805 | 5.791   | 7.3342  | -0.6183 |
| CEU | TBC1D3 | 38263805 | 2.8776  | 4.9463  | -1.1798 |
| CEU | TBC1D3 | 38268805 | 2.9753  | 5.458   | -1.2979 |
| CEU | TBC1D3 | 38273805 | 3.1189  | 8.0164  | -1.8089 |
| CEU | TBC1D3 | 38278805 | 2.3502  | 8.0164  | -2.0928 |
| CEU | TBC1D3 | 38283805 | 2.0144  | 5.6286  | -1.8384 |
| CEU | TBC1D3 | 38288805 | 1.3995  | 4.6052  | -1.9463 |
| CEU | TBC1D3 | 38293805 | 1.1808  | 5.1169  | -2.1787 |
| CEU | TBC1D3 | 38298805 | 1.1911  | 5.1169  | -2.173  |
| CEU | TBC1D3 | 38303805 | 1.7998  | 5.7991  | -1.9808 |
| CEU | TBC1D3 | 38308805 | 2.5644  | 8.5281  | -2.0808 |
| CEU | TBC1D3 | 38313805 | 2.0662  | 7.5047  | -2.1338 |
| CEU | TBC1D3 | 38318805 | 1.6395  | 4.4346  | -1.7537 |
| CEU | TBC1D3 | 38323805 | 1.3979  | 4.6052  | -1.9473 |
| CEU | TBC1D3 | 38328805 | 0.9025  | 4.9463  | -2.3062 |
| CEU | TBC1D3 | 38333805 | 1.1482  | 6.1402  | -2.3491 |
| CEU | TBC1D3 | 38338805 | 1.3441  | 6.3108  | -2.2803 |
| CEU | TBC1D3 | 38343805 | 2.3906  | 5.6286  | -1.647  |
| CEU | TBC1D3 | 38348805 | 5.3368  | 6.3108  | -0.4472 |
| CEU | TBC1D3 | 38353805 | 7.6166  | 7.5047  | 0.0439  |
| CEU | TBC1D3 | 38358805 | 9.1639  | 8.5281  | 0.2218  |
| CEU | TBC1D3 | 38363805 | 7.2179  | 7.6753  | -0.1758 |
| CEU | TBC1D3 | 38368805 | 4.7906  | 8.3576  | -1.268  |
| CEU | TBC1D3 | 38373805 | 4.4989  | 10.0632 | -1.6652 |
| CEU | TBC1D3 | 38378805 | 4.095   | 8.5281  | -1.5468 |
| CEU | TBC1D3 | 38383805 | 4.4725  | 7.1636  | -1.1016 |
| CEU | TBC1D3 | 38388805 | 4.5399  | 7.6753  | -1.2052 |

## 2\_TajimasD\_data

|     |        |          |         |         |         |
|-----|--------|----------|---------|---------|---------|
| CEU | TBC1D3 | 38393805 | 3.8118  | 7.1636  | -1.3721 |
| CEU | TBC1D3 | 38398805 | 2.4063  | 6.8225  | -1.8897 |
| CEU | TBC1D3 | 38403805 | 2.2748  | 6.9931  | -1.9742 |
| CEU | TBC1D3 | 38408805 | 3.0522  | 5.7991  | -1.3605 |
| CEU | TBC1D3 | 38413805 | 4.1105  | 8.0164  | -1.4427 |
| CEU | TBC1D3 | 38418805 | 4.1816  | 8.3576  | -1.4844 |
| CEU | TBC1D3 | 38423805 | 4.0047  | 6.8225  | -1.2057 |
| CEU | TBC1D3 | 38428805 | 3.4444  | 6.8225  | -1.4455 |
| CHB | TBC1D3 | 37428805 | 7.2637  | 9.6567  | -0.742  |
| CHB | TBC1D3 | 37433805 | 7.359   | 9.4872  | -0.6709 |
| CHB | TBC1D3 | 37438805 | 9.1738  | 10.3343 | -0.3378 |
| CHB | TBC1D3 | 37443805 | 6.305   | 7.4543  | -0.4524 |
| CHB | TBC1D3 | 37448805 | 5.7725  | 5.5907  | 0.0928  |
| CHB | TBC1D3 | 37453805 | 7.5022  | 7.1154  | 0.1588  |
| CHB | TBC1D3 | 37458805 | 6.6493  | 7.4543  | -0.3169 |
| CHB | TBC1D3 | 37463805 | 6.3529  | 7.2848  | -0.3746 |
| CHB | TBC1D3 | 37468805 | 6.2854  | 8.979   | -0.8936 |
| CHB | TBC1D3 | 37473805 | 6.3657  | 8.3013  | -0.6903 |
| CHB | TBC1D3 | 37478805 | 5.7771  | 7.1154  | -0.5496 |
| CHB | TBC1D3 | 37483805 | 4.8034  | 7.4543  | -1.0435 |
| CHB | TBC1D3 | 37488805 | 4.7613  | 7.6237  | -1.1038 |
| CHB | TBC1D3 | 37493805 | 5.8317  | 7.7931  | -0.7413 |
| CHB | TBC1D3 | 37498805 | 8.3631  | 8.4708  | -0.0377 |
| CHB | TBC1D3 | 37503805 | 10.0279 | 9.4872  | 0.1704  |
| CHB | TBC1D3 | 37508805 | 8.0628  | 9.1484  | -0.3539 |
| CHB | TBC1D3 | 37513805 | 8.2132  | 9.4872  | -0.4016 |
| CHB | TBC1D3 | 37518805 | 6.9008  | 9.6567  | -0.8545 |
| CHB | TBC1D3 | 37523805 | 4.0504  | 6.946   | -1.2155 |
| CHB | TBC1D3 | 37528805 | 6.2116  | 6.946   | -0.3083 |
| CHB | TBC1D3 | 37533805 | 7.4862  | 7.6237  | -0.053  |
| CHB | TBC1D3 | 37538805 | 6.912   | 7.6237  | -0.2745 |
| CHB | TBC1D3 | 37543805 | 5.7698  | 8.6402  | -0.9867 |
| CHB | TBC1D3 | 37548805 | 6.8793  | 8.1319  | -0.4553 |
| CHB | TBC1D3 | 37553805 | 8.0579  | 7.9625  | 0.0354  |
| CHB | TBC1D3 | 37558805 | 4.1097  | 6.0989  | -0.939  |
| CHB | TBC1D3 | 37563805 | 1.1338  | 3.8965  | -1.9323 |
| CHB | TBC1D3 | 37568805 | 5.7609  | 5.2519  | 0.2745  |
| CHB | TBC1D3 | 37573805 | 9.0196  | 8.3013  | 0.2562  |
| CHB | TBC1D3 | 37578805 | 5.596   | 7.9625  | -0.877  |
| CHB | TBC1D3 | 37583805 | 4.7858  | 5.9295  | -0.5537 |
| CHB | TBC1D3 | 37588805 | 4.6147  | 5.9295  | -0.6365 |
| CHB | TBC1D3 | 37593805 | 4.3579  | 6.4378  | -0.9352 |
| CHB | TBC1D3 | 37598805 | 5.9242  | 6.4378  | -0.2309 |
| CHB | TBC1D3 | 37603805 | 6.47    | 6.946   | -0.1998 |
| CHB | TBC1D3 | 37608805 | 6.7647  | 8.1319  | -0.4969 |
| CHB | TBC1D3 | 37613805 | 6.0731  | 7.9625  | -0.7002 |
| CHB | TBC1D3 | 37618805 | 7.3025  | 8.4708  | -0.409  |
| CHB | TBC1D3 | 37623805 | 9.6254  | 9.1484  | 0.1555  |
| CHB | TBC1D3 | 37628805 | 6.1492  | 7.2848  | -0.4565 |

## 2\_TajimasD\_data

|     |        |          |         |         |         |
|-----|--------|----------|---------|---------|---------|
| CHB | TBC1D3 | 37633805 | 4.8978  | 7.2848  | -0.9595 |
| CHB | TBC1D3 | 37638805 | 5.557   | 6.6072  | -0.4613 |
| CHB | TBC1D3 | 37643805 | 7.0478  | 6.946   | 0.0427  |
| CHB | TBC1D3 | 37648805 | 9.3152  | 8.979   | 0.1115  |
| CHB | TBC1D3 | 37653805 | 6.8211  | 7.7931  | -0.3674 |
| CHB | TBC1D3 | 37658805 | 5.1194  | 5.5907  | -0.2405 |
| CHB | TBC1D3 | 37663805 | 4.6596  | 6.2684  | -0.741  |
| CHB | TBC1D3 | 37668805 | 6.1677  | 7.4543  | -0.5064 |
| CHB | TBC1D3 | 37673805 | 7.3375  | 8.3013  | -0.3437 |
| CHB | TBC1D3 | 37678805 | 5.0918  | 8.8096  | -1.2552 |
| CHB | TBC1D3 | 37683805 | 4.0628  | 6.6072  | -1.1175 |
| CHB | TBC1D3 | 37688805 | 2.6103  | 4.4048  | -1.1292 |
| CHB | TBC1D3 | 37693805 | 4.5899  | 6.4378  | -0.8309 |
| CHB | TBC1D3 | 37698805 | 8.2949  | 8.3013  | -0.0023 |
| CHB | TBC1D3 | 37703805 | 6.6033  | 5.9295  | 0.3262  |
| CHB | TBC1D3 | 37708805 | 5.0653  | 5.5907  | -0.2681 |
| CHB | TBC1D3 | 37713805 | 5.7592  | 6.4378  | -0.3051 |
| CHB | TBC1D3 | 37718805 | 4.6941  | 6.0989  | -0.6631 |
| CHB | TBC1D3 | 37723805 | 3.8102  | 6.7766  | -1.2734 |
| CHB | TBC1D3 | 37728805 | 3.4761  | 7.9625  | -1.6625 |
| CHB | TBC1D3 | 37733805 | 2.7525  | 9.3178  | -2.1044 |
| CHB | TBC1D3 | 37738805 | 6.4417  | 9.9955  | -1.0671 |
| CHB | TBC1D3 | 37743805 | 8.0238  | 8.6402  | -0.2119 |
| CHB | TBC1D3 | 37748805 | 4.3819  | 7.9625  | -1.3269 |
| CHB | TBC1D3 | 37753805 | 1.5623  | 6.2684  | -2.1675 |
| CHB | TBC1D3 | 37758805 | 0.9714  | 4.066   | -2.0868 |
| CHB | TBC1D3 | 37763805 | 1.5622  | 3.5577  | -1.5081 |
| CHB | TBC1D3 | 37768805 | 3.3668  | 7.1154  | -1.5394 |
| CHB | TBC1D3 | 37773805 | 3.4224  | 7.9625  | -1.6824 |
| CHB | TBC1D3 | 37778805 | 3.8262  | 7.1154  | -1.3508 |
| CHB | TBC1D3 | 37783805 | 4.2465  | 7.9625  | -1.377  |
| CHB | TBC1D3 | 37788805 | 4.4763  | 8.1319  | -1.3287 |
| CHB | TBC1D3 | 37793805 | 4.3895  | 7.6237  | -1.2472 |
| CHB | TBC1D3 | 37798805 | 1.842   | 6.4378  | -2.0664 |
| CHB | TBC1D3 | 37803805 | 1.5858  | 7.2848  | -2.2908 |
| CHB | TBC1D3 | 37808805 | 1.7866  | 6.2684  | -2.0642 |
| CHB | TBC1D3 | 37813805 | 3.664   | 6.4378  | -1.2472 |
| CHB | TBC1D3 | 37818805 | 4.1786  | 7.7931  | -1.3661 |
| CHB | TBC1D3 | 37823805 | 5.4219  | 8.979   | -1.18   |
| CHB | TBC1D3 | 37828805 | 15.339  | 11.1814 | 1.1242  |
| CHB | TBC1D3 | 37833805 | 19.8536 | 11.012  | 2.4252  |
| CHB | TBC1D3 | 37838805 | 10.5966 | 8.3013  | 0.8186  |
| CHB | TBC1D3 | 37843805 | 5.6442  | 6.0989  | -0.2146 |
| CHB | TBC1D3 | 37848805 | 5.9661  | 6.0989  | -0.0627 |
| CHB | TBC1D3 | 37853805 | 4.4321  | 6.2684  | -0.8457 |
| CHB | TBC1D3 | 37858805 | 2.3566  | 5.9295  | -1.7297 |
| CHB | TBC1D3 | 37863805 | 1.877   | 5.2519  | -1.8202 |
| CHB | TBC1D3 | 37868805 | 2.3048  | 5.2519  | -1.5895 |
| CHB | TBC1D3 | 37873805 | 3.0175  | 6.6072  | -1.5766 |

## 2\_TajimasD\_data

|     |        |          |         |         |         |
|-----|--------|----------|---------|---------|---------|
| CHB | TBC1D3 | 37878805 | 3.8098  | 5.9295  | -1.0262 |
| CHB | TBC1D3 | 37883805 | 3.0773  | 5.7601  | -1.3329 |
| CHB | TBC1D3 | 37888805 | 2.2675  | 5.4213  | -1.6538 |
| CHB | TBC1D3 | 37893805 | 1.7575  | 6.2684  | -2.0776 |
| CHB | TBC1D3 | 37898805 | 2.416   | 8.1319  | -2.0776 |
| CHB | TBC1D3 | 37903805 | 2.8535  | 8.8096  | -2.0109 |
| CHB | TBC1D3 | 37908805 | 2.8245  | 8.6402  | -1.9991 |
| CHB | TBC1D3 | 37913805 | 2.538   | 6.0989  | -1.6809 |
| CHB | TBC1D3 | 37918805 | 1.85    | 4.4048  | -1.6076 |
| CHB | TBC1D3 | 37923805 | 1.9248  | 4.7436  | -1.6627 |
| CHB | TBC1D3 | 37928805 | 1.7314  | 5.5907  | -1.9691 |
| CHB | TBC1D3 | 37933805 | 1.6647  | 5.5907  | -2.0031 |
| CHB | TBC1D3 | 37938805 | 2.7031  | 6.7766  | -1.7486 |
| CHB | TBC1D3 | 37943805 | 2.4607  | 8.6402  | -2.1241 |
| CHB | TBC1D3 | 37948805 | 0.9815  | 8.1319  | -2.599  |
| CHB | TBC1D3 | 37953805 | 1.6446  | 8.4708  | -2.3897 |
| CHB | TBC1D3 | 37958805 | 2.6918  | 8.8096  | -2.0655 |
| CHB | TBC1D3 | 37963805 | 2.2284  | 7.7931  | -2.1032 |
| CHB | TBC1D3 | 37968805 | 2.0554  | 6.946   | -2.0529 |
| CHB | TBC1D3 | 37973805 | 2.5808  | 6.0989  | -1.6607 |
| CHB | TBC1D3 | 37978805 | 2.7251  | 9.1484  | -2.0942 |
| CHB | TBC1D3 | 37983805 | 2.5071  | 11.5202 | -2.3697 |
| CHB | TBC1D3 | 37988805 | 1.8085  | 8.8096  | -2.3638 |
| CHB | TBC1D3 | 37993805 | 1.1393  | 6.2684  | -2.3623 |
| CHB | TBC1D3 | 37998805 | 1.4689  | 6.0989  | -2.1856 |
| CHB | TBC1D3 | 38003805 | 4.4291  | 8.4708  | -1.4149 |
| CHB | TBC1D3 | 38008805 | 4.185   | 11.1814 | -1.8918 |
| CHB | TBC1D3 | 38013805 | 1.609   | 10.8426 | -2.5698 |
| CHB | TBC1D3 | 38018805 | 2.9762  | 8.8096  | -1.9695 |
| CHB | TBC1D3 | 38023805 | 7.9589  | 9.1484  | -0.3878 |
| CHB | TBC1D3 | 38028805 | 13.5336 | 9.8261  | 1.1312  |
| CHB | TBC1D3 | 38033805 | 12.6545 | 7.7931  | 1.8374  |
| CHB | TBC1D3 | 38038805 | 8.7893  | 6.2684  | 1.161   |
| CHB | TBC1D3 | 38043805 | 5.6259  | 5.5907  | 0.018   |
| CHB | TBC1D3 | 38048805 | 4.7502  | 5.7601  | -0.5017 |
| CHB | TBC1D3 | 38053805 | 6.6849  | 7.1154  | -0.1768 |
| CHB | TBC1D3 | 38058805 | 7.5559  | 6.4378  | 0.5027  |
| CHB | TBC1D3 | 38063805 | 11.2747 | 7.9625  | 1.2274  |
| CHB | TBC1D3 | 38068805 | 13.9834 | 10.6731 | 0.935   |
| CHB | TBC1D3 | 38073805 | 12.4483 | 10.1649 | 0.675   |
| CHB | TBC1D3 | 38078805 | 7.5781  | 7.6237  | -0.0176 |
| CHB | TBC1D3 | 38083805 | 5.7636  | 7.1154  | -0.5551 |
| CHB | TBC1D3 | 38088805 | 11.0706 | 10.6731 | 0.1123  |
| CHB | TBC1D3 | 38093805 | 10.6922 | 11.1814 | -0.1323 |
| CHB | TBC1D3 | 38098805 | 8.7879  | 7.9625  | 0.3059  |
| CHB | TBC1D3 | 38103805 | 11.6969 | 8.1319  | 1.2958  |
| CHB | TBC1D3 | 38108805 | 22.7818 | 13.2144 | 2.21    |
| CHB | TBC1D3 | 38113805 | 24.0563 | 14.4003 | 2.0558  |
| CHB | TBC1D3 | 38118805 | 16.6587 | 12.7061 | 0.9475  |

## 2\_TajimasD\_data

|     |        |          |         |         |         |
|-----|--------|----------|---------|---------|---------|
| CHB | TBC1D3 | 38123805 | 17.3821 | 12.1979 | 1.2916  |
| CHB | TBC1D3 | 38128805 | 14.3303 | 10.3343 | 1.1632  |
| CHB | TBC1D3 | 38133805 | 10.5167 | 8.4708  | 0.7162  |
| CHB | TBC1D3 | 38138805 | 10.3927 | 9.3178  | 0.3445  |
| CHB | TBC1D3 | 38143805 | 14.7304 | 11.8591 | 0.7346  |
| CHB | TBC1D3 | 38148805 | 18.2085 | 11.6896 | 1.6906  |
| CHB | TBC1D3 | 38153805 | 15.067  | 11.1814 | 1.0506  |
| CHB | TBC1D3 | 38158805 | 14.2908 | 11.012  | 0.8993  |
| CHB | TBC1D3 | 38163805 | 18.9422 | 13.2144 | 1.3231  |
| CHB | TBC1D3 | 38168805 | 17.4595 | 14.4003 | 0.6513  |
| CHB | TBC1D3 | 38173805 | 14.0781 | 10.8426 | 0.9005  |
| CHB | TBC1D3 | 38178805 | 12.9271 | 7.7931  | 1.9404  |
| CHB | TBC1D3 | 38183805 | 9.6779  | 6.6072  | 1.3487  |
| CHB | TBC1D3 | 38188805 | 7.3234  | 6.7766  | 0.2347  |
| CHB | TBC1D3 | 38193805 | 7.5806  | 8.4708  | -0.3116 |
| CHB | TBC1D3 | 38198805 | 5.4504  | 9.6567  | -1.3043 |
| CHB | TBC1D3 | 38203805 | 4.3505  | 8.8096  | -1.5055 |
| CHB | TBC1D3 | 38208805 | 6.403   | 6.7766  | -0.1604 |
| CHB | TBC1D3 | 38213805 | 10.5578 | 6.6072  | 1.7351  |
| CHB | TBC1D3 | 38218805 | 12.2121 | 6.946   | 2.2105  |
| CHB | TBC1D3 | 38223805 | 7.5328  | 6.2684  | 0.5823  |
| CHB | TBC1D3 | 38228805 | 3.9069  | 5.4213  | -0.7941 |
| CHB | TBC1D3 | 38233805 | 2.1473  | 4.066   | -1.2938 |
| CHB | TBC1D3 | 38238805 | 2.3229  | 6.4378  | -1.8502 |
| CHB | TBC1D3 | 38243805 | 4.1738  | 8.8096  | -1.5652 |
| CHB | TBC1D3 | 38248805 | 5.1946  | 6.946   | -0.7352 |
| CHB | TBC1D3 | 38253805 | 7.2024  | 6.4378  | 0.3438  |
| CHB | TBC1D3 | 38258805 | 6.0971  | 6.4378  | -0.1532 |
| CHB | TBC1D3 | 38263805 | 2.5924  | 5.7601  | -1.5738 |
| CHB | TBC1D3 | 38268805 | 3.3181  | 5.9295  | -1.2642 |
| CHB | TBC1D3 | 38273805 | 2.9785  | 7.2848  | -1.731  |
| CHB | TBC1D3 | 38278805 | 1.2897  | 7.4543  | -2.4266 |
| CHB | TBC1D3 | 38283805 | 1.6897  | 5.4213  | -1.9567 |
| CHB | TBC1D3 | 38288805 | 1.7323  | 4.5742  | -1.7305 |
| CHB | TBC1D3 | 38293805 | 0.8041  | 4.4048  | -2.2657 |
| CHB | TBC1D3 | 38298805 | 0.9452  | 4.4048  | -2.177  |
| CHB | TBC1D3 | 38303805 | 1.238   | 4.2354  | -1.9513 |
| CHB | TBC1D3 | 38308805 | 1.09    | 6.0989  | -2.3644 |
| CHB | TBC1D3 | 38313805 | 0.9528  | 5.5907  | -2.3664 |
| CHB | TBC1D3 | 38318805 | 1.3232  | 4.913   | -2.0534 |
| CHB | TBC1D3 | 38323805 | 0.9511  | 4.5742  | -2.2062 |
| CHB | TBC1D3 | 38328805 | 0.4232  | 5.2519  | -2.6043 |
| CHB | TBC1D3 | 38333805 | 0.696   | 5.7601  | -2.516  |
| CHB | TBC1D3 | 38338805 | 0.9303  | 4.7436  | -2.2494 |
| CHB | TBC1D3 | 38343805 | 2.0615  | 6.7766  | -2.024  |
| CHB | TBC1D3 | 38348805 | 4.068   | 7.6237  | -1.3712 |
| CHB | TBC1D3 | 38353805 | 6.7653  | 7.6237  | -0.331  |
| CHB | TBC1D3 | 38358805 | 9.4548  | 7.4543  | 0.7875  |
| CHB | TBC1D3 | 38363805 | 7.0268  | 6.2684  | 0.3493  |

## 2\_TajimasD\_data

|     |        |          |         |         |         |
|-----|--------|----------|---------|---------|---------|
| CHB | TBC1D3 | 38368805 | 6.2882  | 6.946   | -0.2761 |
| CHB | TBC1D3 | 38373805 | 6.6737  | 8.1319  | -0.53   |
| CHB | TBC1D3 | 38378805 | 6.2229  | 6.946   | -0.3035 |
| CHB | TBC1D3 | 38383805 | 7.3337  | 5.5907  | 0.8893  |
| CHB | TBC1D3 | 38388805 | 6.6712  | 6.7766  | -0.0452 |
| CHB | TBC1D3 | 38393805 | 4.6501  | 7.4543  | -1.1038 |
| CHB | TBC1D3 | 38398805 | 2.8713  | 4.913   | -1.1678 |
| CHB | TBC1D3 | 38403805 | 3.6151  | 5.2519  | -0.8828 |
| CHB | TBC1D3 | 38408805 | 4.2433  | 7.1154  | -1.1795 |
| CHB | TBC1D3 | 38413805 | 5.7379  | 7.1154  | -0.5657 |
| CHB | TBC1D3 | 38418805 | 6.4245  | 6.4378  | -0.006  |
| CHB | TBC1D3 | 38423805 | 6.6172  | 6.0989  | 0.2447  |
| CHB | TBC1D3 | 38428805 | 5.2878  | 4.7436  | 0.321   |
| YRI | TBC1D3 | 37428805 | 10.7845 | 12.6047 | -0.4382 |
| YRI | TBC1D3 | 37433805 | 10.8498 | 12.4366 | -0.3869 |
| YRI | TBC1D3 | 37438805 | 12.523  | 13.7811 | -0.2783 |
| YRI | TBC1D3 | 37443805 | 10.0208 | 12.7727 | -0.6542 |
| YRI | TBC1D3 | 37448805 | 8.3374  | 11.4282 | -0.816  |
| YRI | TBC1D3 | 37453805 | 9.2063  | 12.1005 | -0.7241 |
| YRI | TBC1D3 | 37458805 | 9.2123  | 12.2685 | -0.7547 |
| YRI | TBC1D3 | 37463805 | 9.2398  | 12.6047 | -0.81   |
| YRI | TBC1D3 | 37468805 | 10.8593 | 12.2685 | -0.348  |
| YRI | TBC1D3 | 37473805 | 10.7136 | 12.2685 | -0.384  |
| YRI | TBC1D3 | 37478805 | 10.5043 | 12.2685 | -0.4357 |
| YRI | TBC1D3 | 37483805 | 10.2578 | 13.2769 | -0.6919 |
| YRI | TBC1D3 | 37488805 | 10.2788 | 16.6382 | -1.1757 |
| YRI | TBC1D3 | 37493805 | 11.06   | 16.134  | -0.9661 |
| YRI | TBC1D3 | 37498805 | 13.8943 | 16.9743 | -0.5586 |
| YRI | TBC1D3 | 37503805 | 16.1628 | 15.4617 | 0.139   |
| YRI | TBC1D3 | 37508805 | 11.9449 | 11.4282 | 0.1364  |
| YRI | TBC1D3 | 37513805 | 11.7105 | 13.2769 | -0.359  |
| YRI | TBC1D3 | 37518805 | 11.2565 | 12.7727 | -0.3605 |
| YRI | TBC1D3 | 37523805 | 8.6293  | 10.2518 | -0.4742 |
| YRI | TBC1D3 | 37528805 | 11.0382 | 11.9324 | -0.2267 |
| YRI | TBC1D3 | 37533805 | 11.4484 | 12.7727 | -0.3148 |
| YRI | TBC1D3 | 37538805 | 11.1902 | 15.2937 | -0.8222 |
| YRI | TBC1D3 | 37543805 | 11.4404 | 16.302  | -0.9165 |
| YRI | TBC1D3 | 37548805 | 11.8041 | 14.2853 | -0.5305 |
| YRI | TBC1D3 | 37553805 | 12.76   | 13.2769 | -0.1185 |
| YRI | TBC1D3 | 37558805 | 7.5964  | 10.4199 | -0.8128 |
| YRI | TBC1D3 | 37563805 | 2.918   | 7.5628  | -1.7981 |
| YRI | TBC1D3 | 37568805 | 8.51    | 10.0837 | -0.4671 |
| YRI | TBC1D3 | 37573805 | 13.1138 | 12.7727 | 0.0811  |
| YRI | TBC1D3 | 37578805 | 9.6164  | 11.5963 | -0.5156 |
| YRI | TBC1D3 | 37583805 | 8.6131  | 10.5879 | -0.56   |
| YRI | TBC1D3 | 37588805 | 8.0647  | 10.2518 | -0.6392 |
| YRI | TBC1D3 | 37593805 | 7.1297  | 11.5963 | -1.1631 |
| YRI | TBC1D3 | 37598805 | 8.2234  | 12.1005 | -0.97   |
| YRI | TBC1D3 | 37603805 | 10.2997 | 11.5963 | -0.3376 |

## 2\_TajimasD\_data

|     |        |          |         |         |         |
|-----|--------|----------|---------|---------|---------|
| YRI | TBC1D3 | 37608805 | 11.3672 | 10.924  | 0.1221  |
| YRI | TBC1D3 | 37613805 | 9.3638  | 10.2518 | -0.2595 |
| YRI | TBC1D3 | 37618805 | 11.4853 | 10.756  | 0.2038  |
| YRI | TBC1D3 | 37623805 | 13.7864 | 11.0921 | 0.7315  |
| YRI | TBC1D3 | 37628805 | 8.817   | 11.0921 | -0.6177 |
| YRI | TBC1D3 | 37633805 | 8.1908  | 12.9408 | -1.1154 |
| YRI | TBC1D3 | 37638805 | 9.9362  | 14.1172 | -0.904  |
| YRI | TBC1D3 | 37643805 | 10.8294 | 14.7895 | -0.8192 |
| YRI | TBC1D3 | 37648805 | 11.8714 | 14.9575 | -0.6316 |
| YRI | TBC1D3 | 37653805 | 8.7173  | 11.7644 | -0.7828 |
| YRI | TBC1D3 | 37658805 | 6.8756  | 9.0754  | -0.7201 |
| YRI | TBC1D3 | 37663805 | 6.6318  | 9.0754  | -0.7999 |
| YRI | TBC1D3 | 37668805 | 8.7019  | 11.5963 | -0.7537 |
| YRI | TBC1D3 | 37673805 | 12.1771 | 14.7895 | -0.5404 |
| YRI | TBC1D3 | 37678805 | 10.462  | 12.7727 | -0.5493 |
| YRI | TBC1D3 | 37683805 | 7.2269  | 8.9073  | -0.5597 |
| YRI | TBC1D3 | 37688805 | 4.1766  | 5.8822  | -0.8288 |
| YRI | TBC1D3 | 37693805 | 7.6267  | 7.3947  | 0.0917  |
| YRI | TBC1D3 | 37698805 | 11.5012 | 11.0921 | 0.1111  |
| YRI | TBC1D3 | 37703805 | 7.7106  | 8.4031  | -0.2434 |
| YRI | TBC1D3 | 37708805 | 6.4041  | 7.5628  | -0.4486 |
| YRI | TBC1D3 | 37713805 | 8.1655  | 10.0837 | -0.5694 |
| YRI | TBC1D3 | 37718805 | 7.7863  | 10.2518 | -0.7206 |
| YRI | TBC1D3 | 37723805 | 7.4031  | 8.5712  | -0.4031 |
| YRI | TBC1D3 | 37728805 | 7.254   | 8.235   | -0.3513 |
| YRI | TBC1D3 | 37733805 | 6.2837  | 10.756  | -1.2498 |
| YRI | TBC1D3 | 37738805 | 9.8884  | 13.2769 | -0.7766 |
| YRI | TBC1D3 | 37743805 | 11.6848 | 11.9324 | -0.0628 |
| YRI | TBC1D3 | 37748805 | 11.7139 | 10.924  | 0.2176  |
| YRI | TBC1D3 | 37753805 | 9.8547  | 12.6047 | -0.662  |
| YRI | TBC1D3 | 37758805 | 5.2132  | 10.5879 | -1.5242 |
| YRI | TBC1D3 | 37763805 | 3.5944  | 8.067   | -1.6321 |
| YRI | TBC1D3 | 37768805 | 8.143   | 10.756  | -0.7302 |
| YRI | TBC1D3 | 37773805 | 8.663   | 10.756  | -0.5849 |
| YRI | TBC1D3 | 37778805 | 7.9961  | 10.5879 | -0.735  |
| YRI | TBC1D3 | 37783805 | 9.1366  | 11.7644 | -0.6751 |
| YRI | TBC1D3 | 37788805 | 8.1809  | 11.5963 | -0.8894 |
| YRI | TBC1D3 | 37793805 | 8.1775  | 10.756  | -0.7206 |
| YRI | TBC1D3 | 37798805 | 6.3134  | 9.0754  | -0.9041 |
| YRI | TBC1D3 | 37803805 | 6.9566  | 10.4199 | -0.997  |
| YRI | TBC1D3 | 37808805 | 6.5342  | 11.5963 | -1.3182 |
| YRI | TBC1D3 | 37813805 | 5.8018  | 12.4366 | -1.6176 |
| YRI | TBC1D3 | 37818805 | 7.3576  | 14.7895 | -1.5374 |
| YRI | TBC1D3 | 37823805 | 8.3237  | 13.7811 | -1.2073 |
| YRI | TBC1D3 | 37828805 | 14.5463 | 12.4366 | 0.5143  |
| YRI | TBC1D3 | 37833805 | 17.6239 | 12.4366 | 1.2647  |
| YRI | TBC1D3 | 37838805 | 9.6732  | 10.0837 | -0.1218 |
| YRI | TBC1D3 | 37843805 | 6.7761  | 9.5795  | -0.8728 |
| YRI | TBC1D3 | 37848805 | 7.4621  | 9.5795  | -0.6592 |

## 2\_TajimasD\_data

|     |        |          |         |         |         |
|-----|--------|----------|---------|---------|---------|
| YRI | TBC1D3 | 37853805 | 5.9232  | 8.7392  | -0.9545 |
| YRI | TBC1D3 | 37858805 | 5.6296  | 7.7309  | -0.7973 |
| YRI | TBC1D3 | 37863805 | 4.9047  | 6.5544  | -0.7273 |
| YRI | TBC1D3 | 37868805 | 3.8071  | 7.0586  | -1.3404 |
| YRI | TBC1D3 | 37873805 | 5.4459  | 9.7476  | -1.3178 |
| YRI | TBC1D3 | 37878805 | 5.1014  | 9.7476  | -1.4233 |
| YRI | TBC1D3 | 37883805 | 3.7363  | 9.9157  | -1.8631 |
| YRI | TBC1D3 | 37888805 | 4.5649  | 9.9157  | -1.6133 |
| YRI | TBC1D3 | 37893805 | 5.3615  | 8.5712  | -1.1077 |
| YRI | TBC1D3 | 37898805 | 6.4023  | 11.4282 | -1.3269 |
| YRI | TBC1D3 | 37903805 | 9.3649  | 13.613  | -0.9508 |
| YRI | TBC1D3 | 37908805 | 10.2108 | 12.9408 | -0.641  |
| YRI | TBC1D3 | 37913805 | 7.4039  | 11.5963 | -1.0917 |
| YRI | TBC1D3 | 37918805 | 5.5813  | 9.5795  | -1.2448 |
| YRI | TBC1D3 | 37923805 | 6.3008  | 10.2518 | -1.1548 |
| YRI | TBC1D3 | 37928805 | 8.0934  | 10.5879 | -0.7074 |
| YRI | TBC1D3 | 37933805 | 7.233   | 8.9073  | -0.5576 |
| YRI | TBC1D3 | 37938805 | 8.064   | 9.7476  | -0.5157 |
| YRI | TBC1D3 | 37943805 | 8.7734  | 9.5795  | -0.251  |
| YRI | TBC1D3 | 37948805 | 6.5852  | 9.2434  | -0.8555 |
| YRI | TBC1D3 | 37953805 | 10.036  | 12.6047 | -0.6184 |
| YRI | TBC1D3 | 37958805 | 10.7458 | 13.1089 | -0.5482 |
| YRI | TBC1D3 | 37963805 | 7.7504  | 10.756  | -0.8399 |
| YRI | TBC1D3 | 37968805 | 7.2536  | 10.0837 | -0.84   |
| YRI | TBC1D3 | 37973805 | 7.6692  | 9.5795  | -0.5947 |
| YRI | TBC1D3 | 37978805 | 9.8332  | 11.4282 | -0.4211 |
| YRI | TBC1D3 | 37983805 | 10.3782 | 13.613  | -0.724  |
| YRI | TBC1D3 | 37988805 | 8.3371  | 12.2685 | -0.9709 |
| YRI | TBC1D3 | 37993805 | 6.5034  | 9.9157  | -1.0288 |
| YRI | TBC1D3 | 37998805 | 8.0158  | 9.2434  | -0.3951 |
| YRI | TBC1D3 | 38003805 | 12.3287 | 13.445  | -0.2528 |
| YRI | TBC1D3 | 38008805 | 14.757  | 17.1423 | -0.4286 |
| YRI | TBC1D3 | 38013805 | 12.9043 | 14.4534 | -0.3276 |
| YRI | TBC1D3 | 38018805 | 10.0342 | 9.7476  | 0.0878  |
| YRI | TBC1D3 | 38023805 | 10.8677 | 11.0921 | -0.0609 |
| YRI | TBC1D3 | 38028805 | 13.5607 | 14.7895 | -0.2542 |
| YRI | TBC1D3 | 38033805 | 11.0425 | 12.1005 | -0.2647 |
| YRI | TBC1D3 | 38038805 | 9.0037  | 9.2434  | -0.0771 |
| YRI | TBC1D3 | 38043805 | 7.6058  | 8.235   | -0.2253 |
| YRI | TBC1D3 | 38048805 | 7.5607  | 8.235   | -0.2414 |
| YRI | TBC1D3 | 38053805 | 9.3718  | 11.0921 | -0.4671 |
| YRI | TBC1D3 | 38058805 | 6.8519  | 10.756  | -1.091  |
| YRI | TBC1D3 | 38063805 | 8.7733  | 12.6047 | -0.9223 |
| YRI | TBC1D3 | 38068805 | 11.989  | 16.134  | -0.7892 |
| YRI | TBC1D3 | 38073805 | 13.225  | 16.4701 | -0.6058 |
| YRI | TBC1D3 | 38078805 | 10.703  | 14.2853 | -0.7659 |
| YRI | TBC1D3 | 38083805 | 7.885   | 11.4282 | -0.9354 |
| YRI | TBC1D3 | 38088805 | 12.5346 | 13.9492 | -0.3094 |
| YRI | TBC1D3 | 38093805 | 12.8666 | 14.6214 | -0.367  |



## 2\_TajimasD\_data

|     |        |          |         |         |         |
|-----|--------|----------|---------|---------|---------|
| YRI | TBC1D3 | 38098805 | 10.2502 | 15.1256 | -0.9872 |
| YRI | TBC1D3 | 38103805 | 12.1329 | 16.6382 | -0.8329 |
| YRI | TBC1D3 | 38108805 | 21.708  | 18.4868 | 0.5383  |
| YRI | TBC1D3 | 38113805 | 24.2449 | 18.1507 | 1.0365  |
| YRI | TBC1D3 | 38118805 | 19.3594 | 15.7978 | 0.6919  |
| YRI | TBC1D3 | 38123805 | 20.6987 | 17.1423 | 0.639   |
| YRI | TBC1D3 | 38128805 | 18.3975 | 16.8062 | 0.2914  |
| YRI | TBC1D3 | 38133805 | 12.8852 | 14.7895 | -0.3939 |
| YRI | TBC1D3 | 38138805 | 11.9853 | 14.9575 | -0.6083 |
| YRI | TBC1D3 | 38143805 | 18.3294 | 17.1423 | 0.2133  |
| YRI | TBC1D3 | 38148805 | 19.1469 | 16.302  | 0.5363  |
| YRI | TBC1D3 | 38153805 | 16.9798 | 14.9575 | 0.4139  |
| YRI | TBC1D3 | 38158805 | 17.7224 | 16.8062 | 0.1678  |
| YRI | TBC1D3 | 38163805 | 20.2722 | 20.3355 | -0.0097 |
| YRI | TBC1D3 | 38168805 | 19.3438 | 22.3523 | -0.4187 |
| YRI | TBC1D3 | 38173805 | 14.2371 | 18.991  | -0.7742 |
| YRI | TBC1D3 | 38178805 | 11.9428 | 15.9659 | -0.7737 |
| YRI | TBC1D3 | 38183805 | 8.9172  | 15.6298 | -1.3174 |
| YRI | TBC1D3 | 38188805 | 8.2548  | 12.9408 | -1.1003 |
| YRI | TBC1D3 | 38193805 | 10.5075 | 13.7811 | -0.7242 |
| YRI | TBC1D3 | 38198805 | 13.45   | 15.7978 | -0.4561 |
| YRI | TBC1D3 | 38203805 | 11.0683 | 14.7895 | -0.7698 |
| YRI | TBC1D3 | 38208805 | 8.3811  | 12.2685 | -0.96   |
| YRI | TBC1D3 | 38213805 | 12.0123 | 12.6047 | -0.1426 |
| YRI | TBC1D3 | 38218805 | 14.4462 | 13.9492 | 0.1087  |
| YRI | TBC1D3 | 38223805 | 11.9303 | 13.9492 | -0.4415 |
| YRI | TBC1D3 | 38228805 | 7.2947  | 13.2769 | -1.371  |
| YRI | TBC1D3 | 38233805 | 5.2042  | 10.756  | -1.5514 |
| YRI | TBC1D3 | 38238805 | 5.7871  | 11.0921 | -1.4403 |
| YRI | TBC1D3 | 38243805 | 7.6168  | 10.924  | -0.9109 |
| YRI | TBC1D3 | 38248805 | 6.1795  | 8.7392  | -0.8677 |
| YRI | TBC1D3 | 38253805 | 8.1337  | 9.9157  | -0.5373 |
| YRI | TBC1D3 | 38258805 | 9.1462  | 10.4199 | -0.3667 |
| YRI | TBC1D3 | 38263805 | 5.4323  | 9.2434  | -1.2265 |
| YRI | TBC1D3 | 38268805 | 5.6741  | 9.2434  | -1.1487 |
| YRI | TBC1D3 | 38273805 | 7.0011  | 11.0921 | -1.1107 |
| YRI | TBC1D3 | 38278805 | 7.7861  | 12.6047 | -1.16   |
| YRI | TBC1D3 | 38283805 | 4.768   | 8.4031  | -1.2776 |
| YRI | TBC1D3 | 38288805 | 3.8759  | 7.0586  | -1.3121 |
| YRI | TBC1D3 | 38293805 | 5.936   | 10.924  | -1.3738 |
| YRI | TBC1D3 | 38298805 | 6.2019  | 12.7727 | -1.5621 |
| YRI | TBC1D3 | 38303805 | 6.8202  | 12.7727 | -1.4151 |
| YRI | TBC1D3 | 38308805 | 7.4438  | 13.7811 | -1.402  |
| YRI | TBC1D3 | 38313805 | 5.4389  | 11.7644 | -1.6251 |
| YRI | TBC1D3 | 38318805 | 4.9758  | 8.9073  | -1.3094 |
| YRI | TBC1D3 | 38323805 | 4.7986  | 8.067   | -1.1927 |
| YRI | TBC1D3 | 38328805 | 5.8187  | 10.4199 | -1.3245 |
| YRI | TBC1D3 | 38333805 | 6.6088  | 11.7644 | -1.3245 |
| YRI | TBC1D3 | 38338805 | 6.7548  | 11.0921 | -1.1776 |

## 2\_TajimasD\_data

|     |        |          |         |         |         |
|-----|--------|----------|---------|---------|---------|
| YRI | TBC1D3 | 38343805 | 7.526   | 10.924  | -0.9359 |
| YRI | TBC1D3 | 38348805 | 7.8316  | 9.9157  | -0.6284 |
| YRI | TBC1D3 | 38353805 | 9.7982  | 10.756  | -0.2677 |
| YRI | TBC1D3 | 38358805 | 12.3846 | 12.9408 | -0.1306 |
| YRI | TBC1D3 | 38363805 | 10.1088 | 11.7644 | -0.4253 |
| YRI | TBC1D3 | 38368805 | 6.8164  | 10.924  | -1.1313 |
| YRI | TBC1D3 | 38373805 | 6.811   | 12.2685 | -1.3477 |
| YRI | TBC1D3 | 38378805 | 6.872   | 11.0921 | -1.1458 |
| YRI | TBC1D3 | 38383805 | 6.3463  | 10.4199 | -1.1727 |
| YRI | TBC1D3 | 38388805 | 5.4138  | 11.2602 | -1.5651 |
| YRI | TBC1D3 | 38393805 | 4.6476  | 10.2518 | -1.638  |
| YRI | TBC1D3 | 38398805 | 3.8375  | 8.9073  | -1.6885 |
| YRI | TBC1D3 | 38403805 | 5.0623  | 10.924  | -1.6144 |
| YRI | TBC1D3 | 38408805 | 4.7283  | 9.5795  | -1.5103 |
| YRI | TBC1D3 | 38413805 | 5.1873  | 8.4031  | -1.1302 |
| YRI | TBC1D3 | 38418805 | 5.6521  | 9.2434  | -1.1558 |
| YRI | TBC1D3 | 38423805 | 5.1813  | 8.9073  | -1.241  |
| YRI | TBC1D3 | 38428805 | 5.0496  | 8.4031  | -1.1786 |
| CEU | TBC1D3 | 37483155 | 5.7219  | 7.3342  | -0.646  |
| CEU | TBC1D3 | 37488155 | 5.2709  | 8.3576  | -1.0972 |
| CEU | TBC1D3 | 37493155 | 6.5432  | 8.6987  | -0.7385 |
| CEU | TBC1D3 | 37498155 | 8.9464  | 8.3576  | 0.2093  |
| CEU | TBC1D3 | 37503155 | 9.551   | 8.187   | 0.4941  |
| CEU | TBC1D3 | 37508155 | 7.5498  | 7.3342  | 0.0864  |
| CEU | TBC1D3 | 37513155 | 7.3201  | 7.6753  | -0.1365 |
| CEU | TBC1D3 | 37518155 | 7.4131  | 8.5281  | -0.389  |
| CEU | TBC1D3 | 37523155 | 5.2989  | 7.1636  | -0.7633 |
| CEU | TBC1D3 | 37528155 | 6.0917  | 6.4814  | -0.1747 |
| CEU | TBC1D3 | 37533155 | 7.6456  | 7.1636  | 0.1973  |
| CEU | TBC1D3 | 37538155 | 6.4674  | 7.3342  | -0.3473 |
| CEU | TBC1D3 | 37543155 | 5.199   | 8.187   | -1.0825 |
| CEU | TBC1D3 | 37548155 | 7.2072  | 8.5281  | -0.4609 |
| CEU | TBC1D3 | 37553155 | 9.0085  | 8.3576  | 0.2314  |
| CEU | TBC1D3 | 37558155 | 5.3979  | 6.9931  | -0.6675 |
| CEU | TBC1D3 | 37563155 | 1.2694  | 3.2407  | -1.6164 |
| CEU | TBC1D3 | 37568155 | 4.5914  | 4.6052  | -0.0084 |
| CEU | TBC1D3 | 37573155 | 9.1196  | 8.3576  | 0.2709  |
| CEU | TBC1D3 | 37578155 | 7.9895  | 8.0164  | -0.0099 |
| CEU | TBC1D3 | 37583155 | 5.4502  | 6.3108  | -0.3951 |
| CEU | TBC1D3 | 37588155 | 4.9746  | 6.1402  | -0.5485 |
| CEU | TBC1D3 | 37593155 | 5.9266  | 7.1636  | -0.5064 |
| CEU | TBC1D3 | 37598155 | 5.3985  | 7.1636  | -0.7225 |
| CEU | TBC1D3 | 37603155 | 6.8899  | 6.9931  | -0.0432 |
| CEU | TBC1D3 | 37608155 | 7.4554  | 6.1402  | 0.6189  |
| CEU | TBC1D3 | 37613155 | 5.8351  | 5.7991  | 0.0178  |
| CEU | TBC1D3 | 37618155 | 7.2581  | 6.9931  | 0.1109  |
| CEU | TBC1D3 | 37623155 | 9.2169  | 7.8459  | 0.5165  |
| CEU | TBC1D3 | 37628155 | 7.4642  | 7.8459  | -0.1438 |
| CEU | TBC1D3 | 37633155 | 7.0186  | 8.5281  | -0.5267 |

## 2\_TajimasD\_data

|     |        |          |         |         |         |
|-----|--------|----------|---------|---------|---------|
| CEU | TBC1D3 | 37638155 | 6.5898  | 7.5047  | -0.359  |
| CEU | TBC1D3 | 37643155 | 7.5079  | 8.8692  | -0.4581 |
| CEU | TBC1D3 | 37648155 | 10.5556 | 10.4043 | 0.0439  |
| CEU | TBC1D3 | 37653155 | 7.2841  | 6.9931  | 0.1218  |
| CEU | TBC1D3 | 37658155 | 5.1932  | 5.458   | -0.1384 |
| CEU | TBC1D3 | 37663155 | 4.8068  | 4.9463  | -0.0796 |
| CEU | TBC1D3 | 37668155 | 6.3469  | 5.6286  | 0.3654  |
| CEU | TBC1D3 | 37673155 | 8.5193  | 7.1636  | 0.555   |
| CEU | TBC1D3 | 37678155 | 5.4403  | 5.9697  | -0.2555 |
| CEU | TBC1D3 | 37683155 | 4.4976  | 4.7757  | -0.1636 |
| CEU | TBC1D3 | 37688155 | 3.7605  | 4.4346  | -0.423  |
| CEU | TBC1D3 | 37693155 | 4.1169  | 4.7757  | -0.3875 |
| CEU | TBC1D3 | 37698155 | 7.8374  | 6.8225  | 0.4343  |
| CEU | TBC1D3 | 37703155 | 7.2814  | 6.4814  | 0.3586  |
| CEU | TBC1D3 | 37708155 | 5.4119  | 5.6286  | -0.1102 |
| CEU | TBC1D3 | 37713155 | 5.645   | 6.3108  | -0.3057 |
| CEU | TBC1D3 | 37718155 | 4.2853  | 5.458   | -0.6131 |
| CEU | TBC1D3 | 37723155 | 3.6034  | 5.1169  | -0.8377 |
| CEU | TBC1D3 | 37728155 | 3.202   | 4.6052  | -0.8519 |
| CEU | TBC1D3 | 37733155 | 3.2964  | 5.9697  | -1.2902 |
| CEU | TBC1D3 | 37738155 | 6.8973  | 8.5281  | -0.569  |
| CEU | TBC1D3 | 37743155 | 7.7598  | 8.3576  | -0.2125 |
| CEU | TBC1D3 | 37748155 | 5.7376  | 9.2104  | -1.1285 |
| CEU | TBC1D3 | 37753155 | 3.315   | 7.3342  | -1.6104 |
| CEU | TBC1D3 | 37758155 | 2.0346  | 4.2641  | -1.4473 |
| CEU | TBC1D3 | 37763155 | 2.3601  | 4.0935  | -1.1656 |
| CEU | TBC1D3 | 37768155 | 4.1777  | 6.3108  | -0.9793 |
| CEU | TBC1D3 | 37773155 | 4.3824  | 6.8225  | -1.0441 |
| CEU | TBC1D3 | 37778155 | 3.7831  | 6.8225  | -1.3006 |
| CEU | TBC1D3 | 37783155 | 3.9417  | 7.8459  | -1.4708 |
| CEU | TBC1D3 | 37788155 | 3.3702  | 6.6519  | -1.4368 |
| CEU | TBC1D3 | 37793155 | 2.993   | 5.7991  | -1.3898 |
| CEU | TBC1D3 | 37798155 | 1.7454  | 6.8225  | -2.1725 |
| CEU | TBC1D3 | 37803155 | 2.1064  | 6.9931  | -2.0447 |
| CEU | TBC1D3 | 37808155 | 3.4793  | 6.6519  | -1.389  |
| CEU | TBC1D3 | 37813155 | 5.1725  | 9.0398  | -1.2786 |
| CEU | TBC1D3 | 37818155 | 5.1983  | 9.8926  | -1.4274 |
| CEU | TBC1D3 | 37823155 | 4.5694  | 7.6753  | -1.1938 |
| CEU | TBC1D3 | 37828155 | 11.733  | 9.3809  | 0.7514  |
| CEU | TBC1D3 | 37833155 | 17.4263 | 11.4277 | 1.5937  |
| CEU | TBC1D3 | 37838155 | 11.1725 | 8.3576  | 1.0006  |
| CEU | TBC1D3 | 37843155 | 5.9359  | 6.9931  | -0.4424 |
| CEU | TBC1D3 | 37848155 | 6.0851  | 6.8225  | -0.3155 |
| CEU | TBC1D3 | 37853155 | 4.3948  | 4.7757  | -0.224  |
| CEU | TBC1D3 | 37858155 | 2.3894  | 4.7757  | -1.4035 |
| CEU | TBC1D3 | 37863155 | 1.8289  | 5.1169  | -1.82   |
| CEU | TBC1D3 | 37868155 | 2.2797  | 4.7757  | -1.468  |
| CEU | TBC1D3 | 37873155 | 3.2921  | 6.3108  | -1.3859 |
| CEU | TBC1D3 | 37878155 | 3.5512  | 6.4814  | -1.3134 |

## 2\_TajimasD\_data

|     |        |          |         |         |         |
|-----|--------|----------|---------|---------|---------|
| CEU | TBC1D3 | 37883155 | 2.9796  | 5.1169  | -1.183  |
| CEU | TBC1D3 | 37888155 | 2.135   | 5.6286  | -1.7771 |
| CEU | TBC1D3 | 37893155 | 2.2375  | 5.6286  | -1.7249 |
| CEU | TBC1D3 | 37898155 | 2.3974  | 5.1169  | -1.5053 |
| CEU | TBC1D3 | 37903155 | 3.054   | 5.6286  | -1.3096 |
| CEU | TBC1D3 | 37908155 | 3.7069  | 4.7757  | -0.6286 |
| CEU | TBC1D3 | 37913155 | 2.8054  | 4.4346  | -1.0222 |
| CEU | TBC1D3 | 37918155 | 2.2785  | 4.4346  | -1.3528 |
| CEU | TBC1D3 | 37923155 | 2.1626  | 4.4346  | -1.4255 |
| CEU | TBC1D3 | 37928155 | 1.9487  | 5.458   | -1.8346 |
| CEU | TBC1D3 | 37933155 | 1.8606  | 5.1169  | -1.8024 |
| CEU | TBC1D3 | 37938155 | 2.4209  | 5.458   | -1.5877 |
| CEU | TBC1D3 | 37943155 | 2.4927  | 7.3342  | -1.9398 |
| CEU | TBC1D3 | 37948155 | 2.1136  | 7.3342  | -2.0917 |
| CEU | TBC1D3 | 37953155 | 2.4331  | 7.1636  | -1.9364 |
| CEU | TBC1D3 | 37958155 | 3.3989  | 6.6519  | -1.4242 |
| CEU | TBC1D3 | 37963155 | 3.006   | 5.7991  | -1.3834 |
| CEU | TBC1D3 | 37968155 | 2.1816  | 5.7991  | -1.7917 |
| CEU | TBC1D3 | 37973155 | 3.1377  | 6.4814  | -1.4987 |
| CEU | TBC1D3 | 37978155 | 3.2993  | 8.0164  | -1.7423 |
| CEU | TBC1D3 | 37983155 | 3.47    | 8.8692  | -1.8168 |
| CEU | TBC1D3 | 37988155 | 2.8932  | 6.6519  | -1.6456 |
| CEU | TBC1D3 | 37993155 | 1.464   | 4.6052  | -1.9072 |
| CEU | TBC1D3 | 37998155 | 1.9598  | 5.6286  | -1.8662 |
| CEU | TBC1D3 | 38003155 | 5.3593  | 7.5047  | -0.8418 |
| CEU | TBC1D3 | 38008155 | 5.0693  | 10.0632 | -1.4945 |
| CEU | TBC1D3 | 38013155 | 2.1618  | 9.8926  | -2.3507 |
| CEU | TBC1D3 | 38018155 | 2.9423  | 7.3342  | -1.7597 |
| CEU | TBC1D3 | 38023155 | 7.9728  | 7.8459  | 0.0478  |
| CEU | TBC1D3 | 38028155 | 14.6147 | 11.0866 | 0.9644  |
| CEU | TBC1D3 | 38033155 | 12.5013 | 9.8926  | 0.7932  |
| CEU | TBC1D3 | 38038155 | 9.4026  | 7.6753  | 0.6639  |
| CEU | TBC1D3 | 38043155 | 8.0647  | 7.5047  | 0.2197  |
| CEU | TBC1D3 | 38048155 | 5.9841  | 6.1402  | -0.0735 |
| CEU | TBC1D3 | 38053155 | 8.0099  | 6.1402  | 0.8798  |
| CEU | TBC1D3 | 38058155 | 8.0249  | 5.7991  | 1.1024  |
| CEU | TBC1D3 | 38063155 | 10.8044 | 8.0164  | 1.0298  |
| CEU | TBC1D3 | 38068155 | 15.8666 | 11.0866 | 1.3066  |
| CEU | TBC1D3 | 38073155 | 14.6996 | 11.0866 | 0.9876  |
| CEU | TBC1D3 | 38078155 | 8.1301  | 7.6753  | 0.1748  |
| CEU | TBC1D3 | 38083155 | 5.5692  | 5.1169  | 0.2504  |
| CEU | TBC1D3 | 38088155 | 9.6423  | 7.1636  | 1.0147  |
| CEU | TBC1D3 | 38093155 | 10.9377 | 8.6987  | 0.7671  |
| CEU | TBC1D3 | 38098155 | 9.1538  | 8.0164  | 0.4201  |
| CEU | TBC1D3 | 38103155 | 9.4714  | 7.6753  | 0.6904  |
| CEU | TBC1D3 | 38108155 | 19.569  | 11.7688 | 2.0158  |
| CEU | TBC1D3 | 38113155 | 25.0127 | 14.1567 | 2.3559  |
| CEU | TBC1D3 | 38118155 | 21.0279 | 13.3039 | 1.7779  |
| CEU | TBC1D3 | 38123155 | 17.4138 | 11.7688 | 1.4589  |

## 2\_TajimasD\_data

|     |        |          |         |         |         |
|-----|--------|----------|---------|---------|---------|
| CEU | TBC1D3 | 38128155 | 14.735  | 9.8926  | 1.4724  |
| CEU | TBC1D3 | 38133155 | 12.6805 | 9.7221  | 0.9142  |
| CEU | TBC1D3 | 38138155 | 9.3575  | 9.5515  | -0.0609 |
| CEU | TBC1D3 | 38143155 | 14.9458 | 11.0866 | 1.0549  |
| CEU | TBC1D3 | 38148155 | 20.4653 | 11.7688 | 2.2475  |
| CEU | TBC1D3 | 38153155 | 17.7609 | 11.0866 | 1.8244  |
| CEU | TBC1D3 | 38158155 | 15.1962 | 9.5515  | 1.7733  |
| CEU | TBC1D3 | 38163155 | 19.7287 | 11.4277 | 2.2054  |
| CEU | TBC1D3 | 38168155 | 20.0167 | 13.4744 | 1.4879  |
| CEU | TBC1D3 | 38173155 | 14.7778 | 11.0866 | 1.009   |
| CEU | TBC1D3 | 38178155 | 13.464  | 9.3809  | 1.3044  |
| CEU | TBC1D3 | 38183155 | 10.3713 | 9.2104  | 0.3772  |
| CEU | TBC1D3 | 38188155 | 7.8227  | 6.8225  | 0.428   |
| CEU | TBC1D3 | 38193155 | 8.3797  | 6.1402  | 1.0538  |
| CEU | TBC1D3 | 38198155 | 5.5108  | 6.6519  | -0.4996 |
| CEU | TBC1D3 | 38203155 | 3.8442  | 6.1402  | -1.0804 |
| CEU | TBC1D3 | 38208155 | 5.428   | 6.9931  | -0.6549 |
| CEU | TBC1D3 | 38213155 | 10.8942 | 8.3576  | 0.9017  |
| CEU | TBC1D3 | 38218155 | 13.5541 | 8.3576  | 1.8472  |
| CEU | TBC1D3 | 38223155 | 8.1969  | 5.9697  | 1.0749  |
| CEU | TBC1D3 | 38228155 | 4.0559  | 4.2641  | -0.1352 |
| CEU | TBC1D3 | 38233155 | 1.7093  | 3.7524  | -1.4802 |
| CEU | TBC1D3 | 38238155 | 1.7908  | 5.6286  | -1.9521 |
| CEU | TBC1D3 | 38243155 | 3.7454  | 7.6753  | -1.5105 |
| CEU | TBC1D3 | 38248155 | 5.5226  | 7.6753  | -0.8274 |
| CEU | TBC1D3 | 38253155 | 7.2169  | 7.6753  | -0.1762 |
| CEU | TBC1D3 | 38258155 | 6.0497  | 7.1636  | -0.456  |
| CEU | TBC1D3 | 38263155 | 2.9965  | 5.458   | -1.2868 |
| CEU | TBC1D3 | 38268155 | 2.8736  | 5.2874  | -1.2979 |
| CEU | TBC1D3 | 38273155 | 3.0002  | 7.3342  | -1.7365 |
| CEU | TBC1D3 | 38278155 | 2.7759  | 8.5281  | -2.007  |
| CEU | TBC1D3 | 38283155 | 2.0738  | 5.9697  | -1.8802 |
| CEU | TBC1D3 | 38288155 | 1.5417  | 4.7757  | -1.902  |
| CEU | TBC1D3 | 38293155 | 1.2402  | 5.458   | -2.205  |
| CEU | TBC1D3 | 38298155 | 1.0181  | 4.6052  | -2.1779 |
| CEU | TBC1D3 | 38303155 | 1.3111  | 4.7757  | -2.0377 |
| CEU | TBC1D3 | 38308155 | 1.8644  | 7.6753  | -2.2336 |
| CEU | TBC1D3 | 38313155 | 2.5549  | 8.5281  | -2.0841 |
| CEU | TBC1D3 | 38318155 | 2.1521  | 5.6286  | -1.7684 |
| CEU | TBC1D3 | 38323155 | 1.3482  | 4.2641  | -1.8928 |
| CEU | TBC1D3 | 38328155 | 1.2729  | 5.2874  | -2.1586 |
| CEU | TBC1D3 | 38333155 | 1.1214  | 6.3108  | -2.3826 |
| CEU | TBC1D3 | 38338155 | 1.2645  | 5.7991  | -2.246  |
| CEU | TBC1D3 | 38343155 | 1.9124  | 5.1169  | -1.7737 |
| CEU | TBC1D3 | 38348155 | 5.3962  | 6.4814  | -0.4864 |
| CEU | TBC1D3 | 38353155 | 7.7743  | 7.5047  | 0.1058  |
| CEU | TBC1D3 | 38358155 | 8.7512  | 8.5281  | 0.0778  |
| CEU | TBC1D3 | 38363155 | 7.5259  | 7.8459  | -0.1205 |
| CEU | TBC1D3 | 38368155 | 4.5949  | 8.0164  | -1.2637 |

## 2\_TajimasD\_data

|     |        |          |        |         |         |
|-----|--------|----------|--------|---------|---------|
| CEU | TBC1D3 | 38373155 | 4.3673 | 9.2104  | -1.5737 |
| CEU | TBC1D3 | 38378155 | 4.5333 | 9.0398  | -1.49   |
| CEU | TBC1D3 | 38383155 | 4.4927 | 8.187   | -1.3384 |
| CEU | TBC1D3 | 38388155 | 4.2338 | 7.1636  | -1.1993 |
| CEU | TBC1D3 | 38393155 | 3.825  | 6.9931  | -1.3256 |
| CEU | TBC1D3 | 38398155 | 2.6308 | 6.6519  | -1.7605 |
| CEU | TBC1D3 | 38403155 | 2.4519 | 7.3342  | -1.9562 |
| CEU | TBC1D3 | 38408155 | 3.2259 | 6.3108  | -1.4163 |
| CEU | TBC1D3 | 38413155 | 3.3537 | 7.5047  | -1.6287 |
| CEU | TBC1D3 | 38418155 | 4.0276 | 8.0164  | -1.4733 |
| CEU | TBC1D3 | 38423155 | 4.3397 | 6.9931  | -1.1102 |
| CEU | TBC1D3 | 38428155 | 3.4065 | 7.1636  | -1.538  |
| CEU | TBC1D3 | 38433155 | 3.1123 | 5.2874  | -1.1696 |
| CEU | TBC1D3 | 38438155 | 2.6412 | 4.2641  | -1.0535 |
| CEU | TBC1D3 | 38443155 | 1.9725 | 4.9463  | -1.696  |
| CEU | TBC1D3 | 38448155 | 1.3867 | 4.6052  | -1.9541 |
| CEU | TBC1D3 | 38453155 | 1.0715 | 4.0935  | -2.0321 |
| CEU | TBC1D3 | 38458155 | 1.7708 | 5.458   | -1.9276 |
| CEU | TBC1D3 | 38463155 | 1.4628 | 4.6052  | -1.9079 |
| CEU | TBC1D3 | 38468155 | 1.879  | 3.5818  | -1.2834 |
| CEU | TBC1D3 | 38473155 | 1.766  | 4.0935  | -1.5651 |
| CEU | TBC1D3 | 38478155 | 1.4031 | 4.2641  | -1.8572 |
| CEU | TBC1D3 | 38483155 | 1.8731 | 4.6052  | -1.6588 |
| CHB | TBC1D3 | 37483155 | 4.7719 | 6.6072  | -0.8061 |
| CHB | TBC1D3 | 37488155 | 4.4078 | 6.946   | -1.0654 |
| CHB | TBC1D3 | 37493155 | 5.8511 | 8.3013  | -0.8739 |
| CHB | TBC1D3 | 37498155 | 8.6483 | 8.6402  | 0.0028  |
| CHB | TBC1D3 | 37503155 | 9.7745 | 9.6567  | 0.0365  |
| CHB | TBC1D3 | 37508155 | 7.7124 | 9.1484  | -0.4682 |
| CHB | TBC1D3 | 37513155 | 7.1125 | 8.6402  | -0.5251 |
| CHB | TBC1D3 | 37518155 | 7.7255 | 10.5037 | -0.7965 |
| CHB | TBC1D3 | 37523155 | 5.5272 | 8.3013  | -0.9894 |
| CHB | TBC1D3 | 37528155 | 5.4884 | 6.0989  | -0.2882 |
| CHB | TBC1D3 | 37533155 | 7.4862 | 7.6237  | -0.053  |
| CHB | TBC1D3 | 37538155 | 6.5168 | 7.6237  | -0.4269 |
| CHB | TBC1D3 | 37543155 | 5.022  | 8.3013  | -1.1696 |
| CHB | TBC1D3 | 37548155 | 6.8867 | 8.3013  | -0.5045 |
| CHB | TBC1D3 | 37553155 | 8.3851 | 7.7931  | 0.2237  |
| CHB | TBC1D3 | 37558155 | 5.2109 | 6.6072  | -0.6133 |
| CHB | TBC1D3 | 37563155 | 1.3859 | 3.5577  | -1.6413 |
| CHB | TBC1D3 | 37568155 | 4.6539 | 4.7436  | -0.0529 |
| CHB | TBC1D3 | 37573155 | 8.3805 | 8.4708  | -0.0316 |
| CHB | TBC1D3 | 37578155 | 6.5376 | 7.7931  | -0.4745 |
| CHB | TBC1D3 | 37583155 | 4.9279 | 6.2684  | -0.6174 |
| CHB | TBC1D3 | 37588155 | 4.6958 | 6.2684  | -0.7243 |
| CHB | TBC1D3 | 37593155 | 5.0234 | 6.7766  | -0.7526 |
| CHB | TBC1D3 | 37598155 | 4.8911 | 6.4378  | -0.6954 |
| CHB | TBC1D3 | 37603155 | 6.47   | 6.946   | -0.1998 |
| CHB | TBC1D3 | 37608155 | 7.3939 | 8.4708  | -0.377  |

## 2\_TajimasD\_data

|     |        |          |         |         |         |
|-----|--------|----------|---------|---------|---------|
| CHB | TBC1D3 | 37613155 | 6.0537  | 7.6237  | -0.6054 |
| CHB | TBC1D3 | 37618155 | 7.024   | 7.6237  | -0.2313 |
| CHB | TBC1D3 | 37623155 | 8.9431  | 9.1484  | -0.0669 |
| CHB | TBC1D3 | 37628155 | 6.9258  | 8.3013  | -0.4906 |
| CHB | TBC1D3 | 37633155 | 5.5344  | 7.2848  | -0.7036 |
| CHB | TBC1D3 | 37638155 | 5.5184  | 6.2684  | -0.3454 |
| CHB | TBC1D3 | 37643155 | 6.1786  | 6.6072  | -0.1882 |
| CHB | TBC1D3 | 37648155 | 9.3539  | 9.3178  | 0.0116  |
| CHB | TBC1D3 | 37653155 | 7.3889  | 7.9625  | -0.2126 |
| CHB | TBC1D3 | 37658155 | 5.1194  | 5.5907  | -0.2405 |
| CHB | TBC1D3 | 37663155 | 4.997   | 6.2684  | -0.5856 |
| CHB | TBC1D3 | 37668155 | 6.1386  | 6.946   | -0.3389 |
| CHB | TBC1D3 | 37673155 | 7.2798  | 8.3013  | -0.3643 |
| CHB | TBC1D3 | 37678155 | 4.3251  | 8.4708  | -1.4513 |
| CHB | TBC1D3 | 37683155 | 4.0653  | 6.7766  | -1.1639 |
| CHB | TBC1D3 | 37688155 | 3.3963  | 5.0825  | -0.9361 |
| CHB | TBC1D3 | 37693155 | 3.8877  | 5.9295  | -0.9885 |
| CHB | TBC1D3 | 37698155 | 7.8921  | 7.9625  | -0.0261 |
| CHB | TBC1D3 | 37703155 | 7.3705  | 6.6072  | 0.3352  |
| CHB | TBC1D3 | 37708155 | 5.4681  | 5.9295  | -0.2234 |
| CHB | TBC1D3 | 37713155 | 5.74    | 6.2684  | -0.2434 |
| CHB | TBC1D3 | 37718155 | 4.6217  | 6.0989  | -0.6973 |
| CHB | TBC1D3 | 37723155 | 3.8197  | 6.6072  | -1.2243 |
| CHB | TBC1D3 | 37728155 | 3.1917  | 7.6237  | -1.7091 |
| CHB | TBC1D3 | 37733155 | 2.6054  | 8.8096  | -2.0947 |
| CHB | TBC1D3 | 37738155 | 6.779   | 9.9955  | -0.9659 |
| CHB | TBC1D3 | 37743155 | 8.1904  | 9.4872  | -0.4088 |
| CHB | TBC1D3 | 37748155 | 4.3819  | 7.9625  | -1.3269 |
| CHB | TBC1D3 | 37753155 | 1.4759  | 5.9295  | -2.1561 |
| CHB | TBC1D3 | 37758155 | 0.9714  | 4.066   | -2.0868 |
| CHB | TBC1D3 | 37763155 | 1.5524  | 3.3883  | -1.4458 |
| CHB | TBC1D3 | 37768155 | 3.3092  | 6.946   | -1.5266 |
| CHB | TBC1D3 | 37773155 | 3.4894  | 8.1319  | -1.6874 |
| CHB | TBC1D3 | 37778155 | 3.2888  | 7.1154  | -1.5715 |
| CHB | TBC1D3 | 37783155 | 4.2659  | 8.1319  | -1.4052 |
| CHB | TBC1D3 | 37788155 | 5.0036  | 7.7931  | -1.0543 |
| CHB | TBC1D3 | 37793155 | 4.3798  | 7.6237  | -1.2509 |
| CHB | TBC1D3 | 37798155 | 1.8449  | 6.946   | -2.1412 |
| CHB | TBC1D3 | 37803155 | 1.5762  | 7.2848  | -2.2947 |
| CHB | TBC1D3 | 37808155 | 1.8709  | 6.6072  | -2.0802 |
| CHB | TBC1D3 | 37813155 | 3.6735  | 6.2684  | -1.1951 |
| CHB | TBC1D3 | 37818155 | 4.1302  | 7.2848  | -1.268  |
| CHB | TBC1D3 | 37823155 | 3.9006  | 8.6402  | -1.6292 |
| CHB | TBC1D3 | 37828155 | 13.3823 | 11.1814 | 0.5951  |
| CHB | TBC1D3 | 37833155 | 19.8449 | 10.5037 | 2.6781  |
| CHB | TBC1D3 | 37838155 | 12.0999 | 8.6402  | 1.1892  |
| CHB | TBC1D3 | 37843155 | 6.197   | 7.1154  | -0.3772 |
| CHB | TBC1D3 | 37848155 | 6.9141  | 6.0989  | 0.3848  |
| CHB | TBC1D3 | 37853155 | 4.79    | 6.2684  | -0.6809 |

## 2\_TajimasD\_data

|     |        |          |         |         |         |
|-----|--------|----------|---------|---------|---------|
| CHB | TBC1D3 | 37858155 | 2.3946  | 5.9295  | -1.7113 |
| CHB | TBC1D3 | 37863155 | 2.0042  | 5.0825  | -1.709  |
| CHB | TBC1D3 | 37868155 | 2.3145  | 5.4213  | -1.6291 |
| CHB | TBC1D3 | 37873155 | 3.5193  | 6.7766  | -1.3982 |
| CHB | TBC1D3 | 37878155 | 3.8292  | 6.2684  | -1.1234 |
| CHB | TBC1D3 | 37883155 | 3.0967  | 6.0989  | -1.4172 |
| CHB | TBC1D3 | 37888155 | 1.7202  | 4.7436  | -1.7834 |
| CHB | TBC1D3 | 37893155 | 1.5669  | 4.7436  | -1.8739 |
| CHB | TBC1D3 | 37898155 | 1.8939  | 7.6237  | -2.2096 |
| CHB | TBC1D3 | 37903155 | 3.0344  | 10.1649 | -2.1079 |
| CHB | TBC1D3 | 37908155 | 3.8843  | 9.4872  | -1.7662 |
| CHB | TBC1D3 | 37913155 | 2.5477  | 6.2684  | -1.7136 |
| CHB | TBC1D3 | 37918155 | 1.8597  | 4.7436  | -1.7011 |
| CHB | TBC1D3 | 37923155 | 1.9248  | 4.5742  | -1.6133 |
| CHB | TBC1D3 | 37928155 | 1.6929  | 5.4213  | -1.9551 |
| CHB | TBC1D3 | 37933155 | 1.5589  | 5.2519  | -1.9918 |
| CHB | TBC1D3 | 37938155 | 2.6449  | 6.0989  | -1.6304 |
| CHB | TBC1D3 | 37943155 | 2.5179  | 8.6402  | -2.1045 |
| CHB | TBC1D3 | 37948155 | 1.0491  | 8.4708  | -2.5981 |
| CHB | TBC1D3 | 37953155 | 1.1702  | 8.6402  | -2.5677 |
| CHB | TBC1D3 | 37958155 | 2.6434  | 8.3013  | -2.0179 |
| CHB | TBC1D3 | 37963155 | 2.7417  | 7.9625  | -1.9347 |
| CHB | TBC1D3 | 37968155 | 2.1329  | 7.7931  | -2.1393 |
| CHB | TBC1D3 | 37973155 | 2.5905  | 6.2684  | -1.6939 |
| CHB | TBC1D3 | 37978155 | 2.2402  | 8.979   | -2.2355 |
| CHB | TBC1D3 | 37983155 | 2.3918  | 10.5037 | -2.3257 |
| CHB | TBC1D3 | 37988155 | 2.2351  | 8.4708  | -2.1829 |
| CHB | TBC1D3 | 37993155 | 1.2256  | 6.946   | -2.4012 |
| CHB | TBC1D3 | 37998155 | 1.4592  | 6.0989  | -2.1901 |
| CHB | TBC1D3 | 38003155 | 4.4194  | 8.4708  | -1.4183 |
| CHB | TBC1D3 | 38008155 | 4.253   | 11.8591 | -1.946  |
| CHB | TBC1D3 | 38013155 | 1.5799  | 10.3343 | -2.5483 |
| CHB | TBC1D3 | 38018155 | 2.4746  | 8.4708  | -2.0991 |
| CHB | TBC1D3 | 38023155 | 7.4854  | 9.1484  | -0.5422 |
| CHB | TBC1D3 | 38028155 | 13.5473 | 9.8261  | 1.1353  |
| CHB | TBC1D3 | 38033155 | 11.3263 | 7.7931  | 1.3354  |
| CHB | TBC1D3 | 38038155 | 8.2922  | 5.9295  | 1.1438  |
| CHB | TBC1D3 | 38043155 | 7.0221  | 6.2684  | 0.3471  |
| CHB | TBC1D3 | 38048155 | 5.2423  | 6.0989  | -0.4044 |
| CHB | TBC1D3 | 38053155 | 7.1584  | 7.2848  | -0.0508 |
| CHB | TBC1D3 | 38058155 | 7.0935  | 6.2684  | 0.38    |
| CHB | TBC1D3 | 38063155 | 9.7485  | 7.1154  | 1.0813  |
| CHB | TBC1D3 | 38068155 | 14.9193 | 11.012  | 1.0717  |
| CHB | TBC1D3 | 38073155 | 13.9745 | 11.012  | 0.8126  |
| CHB | TBC1D3 | 38078155 | 7.5781  | 7.4543  | 0.0487  |
| CHB | TBC1D3 | 38083155 | 5.2705  | 6.6072  | -0.5871 |
| CHB | TBC1D3 | 38088155 | 9.4342  | 9.9955  | -0.1685 |
| CHB | TBC1D3 | 38093155 | 10.5808 | 11.012  | -0.1183 |
| CHB | TBC1D3 | 38098155 | 8.9385  | 8.4708  | 0.1637  |



## 2\_TajimasD\_data

|     |        |          |         |         |         |
|-----|--------|----------|---------|---------|---------|
| CHB | TBC1D3 | 38103155 | 9.6785  | 7.6237  | 0.7924  |
| CHB | TBC1D3 | 38108155 | 20.8454 | 11.6896 | 2.3744  |
| CHB | TBC1D3 | 38113155 | 26.0468 | 14.4003 | 2.4796  |
| CHB | TBC1D3 | 38118155 | 20.0326 | 14.0615 | 1.3004  |
| CHB | TBC1D3 | 38123155 | 15.8121 | 12.3673 | 0.8472  |
| CHB | TBC1D3 | 38128155 | 13.6427 | 10.5037 | 0.8999  |
| CHB | TBC1D3 | 38133155 | 12.2189 | 9.3178  | 0.9299  |
| CHB | TBC1D3 | 38138155 | 8.9393  | 8.979   | -0.0132 |
| CHB | TBC1D3 | 38143155 | 13.7084 | 11.012  | 0.7396  |
| CHB | TBC1D3 | 38148155 | 19.2058 | 11.8591 | 1.8796  |
| CHB | TBC1D3 | 38153155 | 16.4182 | 11.5202 | 1.2878  |
| CHB | TBC1D3 | 38158155 | 13.6986 | 10.3343 | 0.9793  |
| CHB | TBC1D3 | 38163155 | 17.8537 | 12.8755 | 1.1786  |
| CHB | TBC1D3 | 38168155 | 19.0061 | 15.4168 | 0.7161  |
| CHB | TBC1D3 | 38173155 | 14.823  | 11.3508 | 0.9257  |
| CHB | TBC1D3 | 38178155 | 12.6916 | 7.9625  | 1.7525  |
| CHB | TBC1D3 | 38183155 | 9.6848  | 6.7766  | 1.2484  |
| CHB | TBC1D3 | 38188155 | 7.7392  | 6.2684  | 0.6774  |
| CHB | TBC1D3 | 38193155 | 8.0689  | 8.4708  | -0.1407 |
| CHB | TBC1D3 | 38198155 | 5.0293  | 10.1649 | -1.5181 |
| CHB | TBC1D3 | 38203155 | 4.2673  | 8.6402  | -1.5031 |
| CHB | TBC1D3 | 38208155 | 5.407   | 6.4378  | -0.4635 |
| CHB | TBC1D3 | 38213155 | 9.6189  | 6.6072  | 1.3228  |
| CHB | TBC1D3 | 38218155 | 12.9159 | 6.946   | 2.5059  |
| CHB | TBC1D3 | 38223155 | 8.5743  | 6.7766  | 0.7717  |
| CHB | TBC1D3 | 38228155 | 4.6874  | 5.7601  | -0.5329 |
| CHB | TBC1D3 | 38233155 | 1.8195  | 3.8965  | -1.4527 |
| CHB | TBC1D3 | 38238155 | 1.2239  | 5.4213  | -2.201  |
| CHB | TBC1D3 | 38243155 | 3.6562  | 8.4708  | -1.6855 |
| CHB | TBC1D3 | 38248155 | 5.4723  | 7.7931  | -0.8771 |
| CHB | TBC1D3 | 38253155 | 8.0187  | 6.4378  | 0.7108  |
| CHB | TBC1D3 | 38258155 | 6.6115  | 6.2684  | 0.158   |
| CHB | TBC1D3 | 38263155 | 2.498   | 5.5907  | -1.578  |
| CHB | TBC1D3 | 38268155 | 2.7323  | 5.4213  | -1.41   |
| CHB | TBC1D3 | 38273155 | 3.0731  | 7.6237  | -1.7548 |
| CHB | TBC1D3 | 38278155 | 2.163   | 7.9625  | -2.1491 |
| CHB | TBC1D3 | 38283155 | 1.6709  | 5.5907  | -2      |
| CHB | TBC1D3 | 38288155 | 1.7615  | 5.0825  | -1.8438 |
| CHB | TBC1D3 | 38293155 | 0.8519  | 4.5742  | -2.2666 |
| CHB | TBC1D3 | 38298155 | 0.545   | 4.066   | -2.3743 |
| CHB | TBC1D3 | 38303155 | 0.767   | 3.2189  | -2.0158 |
| CHB | TBC1D3 | 38308155 | 1.1709  | 5.0825  | -2.1716 |
| CHB | TBC1D3 | 38313155 | 1.4043  | 6.2684  | -2.2402 |
| CHB | TBC1D3 | 38318155 | 1.2043  | 5.7601  | -2.2634 |
| CHB | TBC1D3 | 38323155 | 0.9705  | 4.913   | -2.2551 |
| CHB | TBC1D3 | 38328155 | 0.8325  | 5.5907  | -2.4277 |
| CHB | TBC1D3 | 38333155 | 0.696   | 5.7601  | -2.516  |
| CHB | TBC1D3 | 38338155 | 0.9301  | 4.5742  | -2.219  |
| CHB | TBC1D3 | 38343155 | 1.6381  | 6.2684  | -2.1325 |

## 2\_TajimasD\_data

|     |        |          |         |         |         |
|-----|--------|----------|---------|---------|---------|
| CHB | TBC1D3 | 38348155 | 4.0777  | 7.6237  | -1.3674 |
| CHB | TBC1D3 | 38353155 | 6.7885  | 7.7931  | -0.3797 |
| CHB | TBC1D3 | 38358155 | 9.0801  | 7.6237  | 0.5616  |
| CHB | TBC1D3 | 38363155 | 7.4173  | 6.4378  | 0.4404  |
| CHB | TBC1D3 | 38368155 | 5.8321  | 6.7766  | -0.4054 |
| CHB | TBC1D3 | 38373155 | 6.2547  | 6.946   | -0.2902 |
| CHB | TBC1D3 | 38378155 | 6.6638  | 6.7766  | -0.0484 |
| CHB | TBC1D3 | 38383155 | 7.3594  | 6.7766  | 0.2502  |
| CHB | TBC1D3 | 38388155 | 6.2305  | 6.4378  | -0.0932 |
| CHB | TBC1D3 | 38393155 | 5.0145  | 7.1154  | -0.8628 |
| CHB | TBC1D3 | 38398155 | 3.3135  | 5.5907  | -1.1619 |
| CHB | TBC1D3 | 38403155 | 3.6054  | 5.2519  | -0.888  |
| CHB | TBC1D3 | 38408155 | 4.6219  | 6.7766  | -0.9249 |
| CHB | TBC1D3 | 38413155 | 4.5884  | 6.946   | -0.9896 |
| CHB | TBC1D3 | 38418155 | 6.0638  | 6.7766  | -0.306  |
| CHB | TBC1D3 | 38423155 | 6.9933  | 6.0989  | 0.4222  |
| CHB | TBC1D3 | 38428155 | 5.2589  | 4.5742  | 0.4169  |
| CHB | TBC1D3 | 38433155 | 3.6225  | 4.7436  | -0.6613 |
| CHB | TBC1D3 | 38438155 | 3.197   | 4.913   | -0.9815 |
| CHB | TBC1D3 | 38443155 | 2.7976  | 3.8965  | -0.7686 |
| CHB | TBC1D3 | 38448155 | 1.6608  | 2.7106  | -0.9947 |
| CHB | TBC1D3 | 38453155 | 1.4377  | 2.033   | -0.7099 |
| CHB | TBC1D3 | 38458155 | 2.9874  | 4.2354  | -0.8125 |
| CHB | TBC1D3 | 38463155 | 2.422   | 5.7601  | -1.6584 |
| CHB | TBC1D3 | 38468155 | 1.676   | 4.2354  | -1.6662 |
| CHB | TBC1D3 | 38473155 | 2.0261  | 4.4048  | -1.4968 |
| CHB | TBC1D3 | 38478155 | 2.169   | 4.5742  | -1.4646 |
| CHB | TBC1D3 | 38483155 | 2.6998  | 4.7436  | -1.2056 |
| YRI | TBC1D3 | 37483155 | 10.4838 | 13.2769 | -0.6401 |
| YRI | TBC1D3 | 37488155 | 9.4065  | 15.1256 | -1.1581 |
| YRI | TBC1D3 | 37493155 | 11.3724 | 17.3104 | -1.0569 |
| YRI | TBC1D3 | 37498155 | 14.3891 | 18.6549 | -0.7067 |
| YRI | TBC1D3 | 37503155 | 15.4296 | 15.1256 | 0.0616  |
| YRI | TBC1D3 | 37508155 | 12.3871 | 11.4282 | 0.2532  |
| YRI | TBC1D3 | 37513155 | 10.3366 | 11.7644 | -0.3668 |
| YRI | TBC1D3 | 37518155 | 11.8416 | 12.2685 | -0.1054 |
| YRI | TBC1D3 | 37523155 | 10.638  | 11.5963 | -0.2495 |
| YRI | TBC1D3 | 37528155 | 9.9007  | 12.1005 | -0.5503 |
| YRI | TBC1D3 | 37533155 | 11.51   | 12.9408 | -0.336  |
| YRI | TBC1D3 | 37538155 | 11.0909 | 13.613  | -0.5645 |
| YRI | TBC1D3 | 37543155 | 10.6575 | 15.7978 | -0.9986 |
| YRI | TBC1D3 | 37548155 | 12.1011 | 15.9659 | -0.7432 |
| YRI | TBC1D3 | 37553155 | 13.1976 | 13.9492 | -0.1644 |
| YRI | TBC1D3 | 37558155 | 8.674   | 11.2602 | -0.6923 |
| YRI | TBC1D3 | 37563155 | 2.7869  | 6.8906  | -1.7292 |
| YRI | TBC1D3 | 37568155 | 7.2087  | 9.0754  | -0.6111 |
| YRI | TBC1D3 | 37573155 | 12.3326 | 12.6047 | -0.0655 |
| YRI | TBC1D3 | 37578155 | 10.8101 | 12.1005 | -0.3228 |
| YRI | TBC1D3 | 37583155 | 8.9885  | 10.924  | -0.5331 |

## 2\_TajimasD\_data

|     |        |          |         |         |         |
|-----|--------|----------|---------|---------|---------|
| YRI | TBC1D3 | 37588155 | 7.9828  | 9.9157  | -0.5828 |
| YRI | TBC1D3 | 37593155 | 7.8052  | 11.9324 | -1.0462 |
| YRI | TBC1D3 | 37598155 | 7.1443  | 11.9324 | -1.2138 |
| YRI | TBC1D3 | 37603155 | 10.543  | 11.7644 | -0.3138 |
| YRI | TBC1D3 | 37608155 | 12.2582 | 11.4282 | 0.2191  |
| YRI | TBC1D3 | 37613155 | 9.3638  | 10.2518 | -0.2595 |
| YRI | TBC1D3 | 37618155 | 10.2907 | 10.0837 | 0.0614  |
| YRI | TBC1D3 | 37623155 | 12.8633 | 10.5879 | 0.6453  |
| YRI | TBC1D3 | 37628155 | 10.3524 | 12.1005 | -0.4373 |
| YRI | TBC1D3 | 37633155 | 9.0055  | 13.2769 | -0.9789 |
| YRI | TBC1D3 | 37638155 | 9.8718  | 13.613  | -0.8374 |
| YRI | TBC1D3 | 37643155 | 10.4613 | 14.4534 | -0.8441 |
| YRI | TBC1D3 | 37648155 | 11.8707 | 14.4534 | -0.5461 |
| YRI | TBC1D3 | 37653155 | 8.4238  | 11.7644 | -0.8582 |
| YRI | TBC1D3 | 37658155 | 6.9589  | 9.9157  | -0.8915 |
| YRI | TBC1D3 | 37663155 | 7.2799  | 9.5795  | -0.7159 |
| YRI | TBC1D3 | 37668155 | 8.5614  | 11.2602 | -0.7225 |
| YRI | TBC1D3 | 37673155 | 11.0927 | 14.1172 | -0.654  |
| YRI | TBC1D3 | 37678155 | 9.8502  | 12.2685 | -0.5972 |
| YRI | TBC1D3 | 37683155 | 8.0609  | 8.9073  | -0.2819 |
| YRI | TBC1D3 | 37688155 | 4.8267  | 6.8906  | -0.8697 |
| YRI | TBC1D3 | 37693155 | 6.7753  | 7.3947  | -0.2448 |
| YRI | TBC1D3 | 37698155 | 10.8386 | 10.756  | 0.0231  |
| YRI | TBC1D3 | 37703155 | 8.953   | 9.4115  | -0.1451 |
| YRI | TBC1D3 | 37708155 | 7.1783  | 7.8989  | -0.2681 |
| YRI | TBC1D3 | 37713155 | 8.1469  | 9.7476  | -0.4904 |
| YRI | TBC1D3 | 37718155 | 7.3808  | 9.7476  | -0.725  |
| YRI | TBC1D3 | 37723155 | 7.4216  | 8.9073  | -0.4948 |
| YRI | TBC1D3 | 37728155 | 7.2284  | 8.5712  | -0.4634 |
| YRI | TBC1D3 | 37733155 | 5.607   | 9.5795  | -1.2368 |
| YRI | TBC1D3 | 37738155 | 10.0663 | 12.7727 | -0.6434 |
| YRI | TBC1D3 | 37743155 | 12.3523 | 12.9408 | -0.1382 |
| YRI | TBC1D3 | 37748155 | 11.886  | 11.4282 | 0.1209  |
| YRI | TBC1D3 | 37753155 | 8.7854  | 11.2602 | -0.6625 |
| YRI | TBC1D3 | 37758155 | 4.8182  | 10.2518 | -1.5881 |
| YRI | TBC1D3 | 37763155 | 4.4227  | 9.0754  | -1.523  |
| YRI | TBC1D3 | 37768155 | 7.9523  | 10.924  | -0.8185 |
| YRI | TBC1D3 | 37773155 | 8.5988  | 10.756  | -0.6028 |
| YRI | TBC1D3 | 37778155 | 7.8089  | 10.4199 | -0.7516 |
| YRI | TBC1D3 | 37783155 | 9.3266  | 11.7644 | -0.6263 |
| YRI | TBC1D3 | 37788155 | 8.1108  | 11.4282 | -0.8758 |
| YRI | TBC1D3 | 37793155 | 7.9324  | 10.924  | -0.8239 |
| YRI | TBC1D3 | 37798155 | 6.7589  | 9.0754  | -0.7583 |
| YRI | TBC1D3 | 37803155 | 6.6234  | 9.9157  | -0.9926 |
| YRI | TBC1D3 | 37808155 | 6.5968  | 11.4282 | -1.2755 |
| YRI | TBC1D3 | 37813155 | 6.0309  | 12.1005 | -1.5185 |
| YRI | TBC1D3 | 37818155 | 7.0839  | 14.9575 | -1.6114 |
| YRI | TBC1D3 | 37823155 | 7.2972  | 14.2853 | -1.4941 |
| YRI | TBC1D3 | 37828155 | 13.2787 | 12.4366 | 0.2053  |

## 2\_TajimasD\_data

|     |        |          |         |         |         |
|-----|--------|----------|---------|---------|---------|
| YRI | TBC1D3 | 37833155 | 17.6923 | 12.1005 | 1.399   |
| YRI | TBC1D3 | 37838155 | 11.1594 | 9.7476  | 0.4325  |
| YRI | TBC1D3 | 37843155 | 7.0652  | 9.5795  | -0.7828 |
| YRI | TBC1D3 | 37848155 | 8.2564  | 10.5879 | -0.6612 |
| YRI | TBC1D3 | 37853155 | 6.4425  | 8.7392  | -0.7785 |
| YRI | TBC1D3 | 37858155 | 5.3513  | 7.3947  | -0.8075 |
| YRI | TBC1D3 | 37863155 | 4.9881  | 7.0586  | -0.8536 |
| YRI | TBC1D3 | 37868155 | 4.1298  | 7.3947  | -1.2901 |
| YRI | TBC1D3 | 37873155 | 5.5835  | 9.7476  | -1.2756 |
| YRI | TBC1D3 | 37878155 | 5.1369  | 9.7476  | -1.4124 |
| YRI | TBC1D3 | 37883155 | 3.9857  | 9.7476  | -1.7651 |
| YRI | TBC1D3 | 37888155 | 3.8616  | 9.5795  | -1.7802 |
| YRI | TBC1D3 | 37893155 | 4.5891  | 8.235   | -1.3054 |
| YRI | TBC1D3 | 37898155 | 5.458   | 10.5879 | -1.4548 |
| YRI | TBC1D3 | 37903155 | 10.2178 | 14.2853 | -0.8697 |
| YRI | TBC1D3 | 37908155 | 11.6754 | 13.7811 | -0.4658 |
| YRI | TBC1D3 | 37913155 | 7.4396  | 11.5963 | -1.0824 |
| YRI | TBC1D3 | 37918155 | 5.6513  | 9.9157  | -1.2857 |
| YRI | TBC1D3 | 37923155 | 6.2374  | 9.7476  | -1.0753 |
| YRI | TBC1D3 | 37928155 | 8.2696  | 10.756  | -0.6948 |
| YRI | TBC1D3 | 37933155 | 6.6771  | 9.0754  | -0.7851 |
| YRI | TBC1D3 | 37938155 | 6.955   | 8.9073  | -0.6502 |
| YRI | TBC1D3 | 37943155 | 8.9937  | 9.7476  | -0.2309 |
| YRI | TBC1D3 | 37948155 | 7.5152  | 9.5795  | -0.6427 |
| YRI | TBC1D3 | 37953155 | 9.6515  | 12.4366 | -0.679  |
| YRI | TBC1D3 | 37958155 | 10.6313 | 13.1089 | -0.5747 |
| YRI | TBC1D3 | 37963155 | 8.4558  | 11.0921 | -0.7158 |
| YRI | TBC1D3 | 37968155 | 7.5194  | 10.0837 | -0.7611 |
| YRI | TBC1D3 | 37973155 | 7.7209  | 9.7476  | -0.6209 |
| YRI | TBC1D3 | 37978155 | 9.273   | 11.5963 | -0.605  |
| YRI | TBC1D3 | 37983155 | 9.7553  | 12.7727 | -0.7173 |
| YRI | TBC1D3 | 37988155 | 8.2407  | 11.7644 | -0.9053 |
| YRI | TBC1D3 | 37993155 | 6.7933  | 10.0837 | -0.9766 |
| YRI | TBC1D3 | 37998155 | 8.1546  | 9.7476  | -0.488  |
| YRI | TBC1D3 | 38003155 | 12.1834 | 13.1089 | -0.2147 |
| YRI | TBC1D3 | 38008155 | 15.1934 | 16.9743 | -0.323  |
| YRI | TBC1D3 | 38013155 | 12.9419 | 15.2937 | -0.4712 |
| YRI | TBC1D3 | 38018155 | 9.4941  | 10.2518 | -0.2215 |
| YRI | TBC1D3 | 38023155 | 10.14   | 10.4199 | -0.0806 |
| YRI | TBC1D3 | 38028155 | 13.5052 | 14.1172 | -0.1323 |
| YRI | TBC1D3 | 38033155 | 11.1192 | 12.2685 | -0.2838 |
| YRI | TBC1D3 | 38038155 | 8.7969  | 9.2434  | -0.1437 |
| YRI | TBC1D3 | 38043155 | 8.286   | 8.9073  | -0.2069 |
| YRI | TBC1D3 | 38048155 | 7.8615  | 8.7392  | -0.2975 |
| YRI | TBC1D3 | 38053155 | 9.7743  | 10.924  | -0.3166 |
| YRI | TBC1D3 | 38058155 | 6.9852  | 10.756  | -1.0537 |
| YRI | TBC1D3 | 38063155 | 7.979   | 11.4282 | -0.9106 |
| YRI | TBC1D3 | 38068155 | 12.448  | 15.9659 | -0.6765 |
| YRI | TBC1D3 | 38073155 | 13.7756 | 16.9743 | -0.5802 |

## 2\_TajimasD\_data

|     |        |          |         |         |         |
|-----|--------|----------|---------|---------|---------|
| YRI | TBC1D3 | 38078155 | 10.3763 | 14.6214 | -0.8878 |
| YRI | TBC1D3 | 38083155 | 7.5562  | 11.7644 | -1.0811 |
| YRI | TBC1D3 | 38088155 | 11.6271 | 12.7727 | -0.2723 |
| YRI | TBC1D3 | 38093155 | 12.9585 | 14.6214 | -0.3478 |
| YRI | TBC1D3 | 38098155 | 10.1697 | 15.4617 | -1.0494 |
| YRI | TBC1D3 | 38103155 | 10.8093 | 16.134  | -1.0138 |
| YRI | TBC1D3 | 38108155 | 19.4265 | 17.8146 | 0.2791  |
| YRI | TBC1D3 | 38113155 | 25.1119 | 18.3188 | 1.1452  |
| YRI | TBC1D3 | 38118155 | 22.8649 | 16.9743 | 1.0684  |
| YRI | TBC1D3 | 38123155 | 19.3912 | 16.6382 | 0.509   |
| YRI | TBC1D3 | 38128155 | 17.5318 | 16.302  | 0.2318  |
| YRI | TBC1D3 | 38133155 | 14.9401 | 15.7978 | -0.1666 |
| YRI | TBC1D3 | 38138155 | 11.2146 | 14.9575 | -0.766  |
| YRI | TBC1D3 | 38143155 | 16.9053 | 16.6382 | 0.0494  |
| YRI | TBC1D3 | 38148155 | 20.1064 | 16.134  | 0.7563  |
| YRI | TBC1D3 | 38153155 | 17.1243 | 14.6214 | 0.5234  |
| YRI | TBC1D3 | 38158155 | 15.8373 | 15.9659 | -0.0247 |
| YRI | TBC1D3 | 38163155 | 20.4723 | 19.6633 | 0.1274  |
| YRI | TBC1D3 | 38168155 | 21.2445 | 23.0245 | -0.2407 |
| YRI | TBC1D3 | 38173155 | 14.974  | 20.3355 | -0.8175 |
| YRI | TBC1D3 | 38178155 | 12.2924 | 15.9659 | -0.7065 |
| YRI | TBC1D3 | 38183155 | 9.4079  | 16.134  | -1.2806 |
| YRI | TBC1D3 | 38188155 | 7.8639  | 13.2769 | -1.2406 |
| YRI | TBC1D3 | 38193155 | 9.6862  | 13.445  | -0.8513 |
| YRI | TBC1D3 | 38198155 | 13.5501 | 16.134  | -0.492  |
| YRI | TBC1D3 | 38203155 | 11.3877 | 14.2853 | -0.6195 |
| YRI | TBC1D3 | 38208155 | 7.8162  | 11.9324 | -1.0434 |
| YRI | TBC1D3 | 38213155 | 11.9309 | 13.1089 | -0.2733 |
| YRI | TBC1D3 | 38218155 | 14.5851 | 13.9492 | 0.1391  |
| YRI | TBC1D3 | 38223155 | 12.4286 | 12.9408 | -0.1203 |
| YRI | TBC1D3 | 38228155 | 8.1485  | 13.9492 | -1.2686 |
| YRI | TBC1D3 | 38233155 | 5.226   | 11.7644 | -1.6798 |
| YRI | TBC1D3 | 38238155 | 4.8179  | 10.4199 | -1.6126 |
| YRI | TBC1D3 | 38243155 | 7.0017  | 10.756  | -1.0491 |
| YRI | TBC1D3 | 38248155 | 6.8638  | 9.4115  | -0.8063 |
| YRI | TBC1D3 | 38253155 | 8.556   | 9.5795  | -0.3186 |
| YRI | TBC1D3 | 38258155 | 9.3749  | 10.4199 | -0.3008 |
| YRI | TBC1D3 | 38263155 | 5.603   | 10.0837 | -1.3299 |
| YRI | TBC1D3 | 38268155 | 4.6597  | 8.4031  | -1.3157 |
| YRI | TBC1D3 | 38273155 | 6.7512  | 10.4199 | -1.0561 |
| YRI | TBC1D3 | 38278155 | 8.5212  | 13.2769 | -1.0899 |
| YRI | TBC1D3 | 38283155 | 5.136   | 8.9073  | -1.2561 |
| YRI | TBC1D3 | 38288155 | 4.442   | 7.5628  | -1.2082 |
| YRI | TBC1D3 | 38293155 | 5.9171  | 10.5879 | -1.3246 |
| YRI | TBC1D3 | 38298155 | 5.9425  | 11.4282 | -1.4482 |
| YRI | TBC1D3 | 38303155 | 5.9337  | 11.7644 | -1.4979 |
| YRI | TBC1D3 | 38308155 | 5.6734  | 12.4366 | -1.6489 |
| YRI | TBC1D3 | 38313155 | 6.3364  | 13.2769 | -1.5907 |
| YRI | TBC1D3 | 38318155 | 6.704   | 11.5963 | -1.274  |

## 2\_TajimasD\_data

|     |        |          |         |         |         |
|-----|--------|----------|---------|---------|---------|
| YRI | TBC1D3 | 38323155 | 4.8783  | 8.067   | -1.1636 |
| YRI | TBC1D3 | 38328155 | 5.8333  | 9.5795  | -1.1663 |
| YRI | TBC1D3 | 38333155 | 6.2695  | 11.2602 | -1.336  |
| YRI | TBC1D3 | 38338155 | 6.5762  | 11.4282 | -1.2809 |
| YRI | TBC1D3 | 38343155 | 6.9811  | 10.924  | -1.0859 |
| YRI | TBC1D3 | 38348155 | 8.369   | 10.5879 | -0.6293 |
| YRI | TBC1D3 | 38353155 | 10.3789 | 10.924  | -0.1501 |
| YRI | TBC1D3 | 38358155 | 11.8445 | 12.4366 | -0.1444 |
| YRI | TBC1D3 | 38363155 | 10.3848 | 11.9324 | -0.3923 |
| YRI | TBC1D3 | 38368155 | 6.5497  | 10.756  | -1.1754 |
| YRI | TBC1D3 | 38373155 | 6.4328  | 11.0921 | -1.265  |
| YRI | TBC1D3 | 38378155 | 7.2906  | 10.924  | -1.0007 |
| YRI | TBC1D3 | 38383155 | 6.2816  | 11.7644 | -1.4086 |
| YRI | TBC1D3 | 38388155 | 5.5557  | 11.2602 | -1.5271 |
| YRI | TBC1D3 | 38393155 | 4.9805  | 9.0754  | -1.3404 |
| YRI | TBC1D3 | 38398155 | 3.5642  | 9.2434  | -1.8277 |
| YRI | TBC1D3 | 38403155 | 5.1177  | 11.5963 | -1.6871 |
| YRI | TBC1D3 | 38408155 | 5.1933  | 9.5795  | -1.3656 |
| YRI | TBC1D3 | 38413155 | 4.6423  | 7.8989  | -1.2115 |
| YRI | TBC1D3 | 38418155 | 5.4245  | 9.2434  | -1.229  |
| YRI | TBC1D3 | 38423155 | 5.1164  | 9.2434  | -1.3282 |
| YRI | TBC1D3 | 38428155 | 4.4477  | 8.067   | -1.3207 |
| YRI | TBC1D3 | 38433155 | 4.4847  | 7.8989  | -1.2702 |
| YRI | TBC1D3 | 38438155 | 4.3572  | 7.8989  | -1.3176 |
| YRI | TBC1D3 | 38443155 | 4.1166  | 7.3947  | -1.2954 |
| YRI | TBC1D3 | 38448155 | 3.1767  | 6.5544  | -1.4892 |
| YRI | TBC1D3 | 38453155 | 3.0228  | 6.5544  | -1.557  |
| YRI | TBC1D3 | 38458155 | 4.981   | 8.4031  | -1.2027 |
| YRI | TBC1D3 | 38463155 | 4.5852  | 8.4031  | -1.3418 |
| YRI | TBC1D3 | 38468155 | 4.6036  | 7.0586  | -1.0121 |
| YRI | TBC1D3 | 38473155 | 3.8363  | 7.2267  | -1.3681 |
| YRI | TBC1D3 | 38478155 | 2.4377  | 7.2267  | -1.9325 |
| YRI | TBC1D3 | 38483155 | 3.3259  | 6.8906  | -1.5021 |
| CEU | TBC1D3 | 37508976 | 8.2162  | 7.6753  | 0.2079  |
| CEU | TBC1D3 | 37513976 | 8.2206  | 8.0164  | 0.0754  |
| CEU | TBC1D3 | 37518976 | 6.1078  | 7.8459  | -0.6548 |
| CEU | TBC1D3 | 37523976 | 4.3397  | 6.3108  | -0.905  |
| CEU | TBC1D3 | 37528976 | 6.6512  | 7.1636  | -0.2098 |
| CEU | TBC1D3 | 37533976 | 7.4135  | 7.5047  | -0.0358 |
| CEU | TBC1D3 | 37538976 | 7.2835  | 8.3576  | -0.3818 |
| CEU | TBC1D3 | 37543976 | 5.8377  | 8.3576  | -0.8957 |
| CEU | TBC1D3 | 37548976 | 7.0078  | 7.1636  | -0.0638 |
| CEU | TBC1D3 | 37553976 | 8.6054  | 8.5281  | 0.027   |
| CEU | TBC1D3 | 37558976 | 4.2513  | 6.8225  | -1.1002 |
| CEU | TBC1D3 | 37563976 | 1.0724  | 2.729   | -1.5658 |
| CEU | TBC1D3 | 37568976 | 5.7308  | 5.1169  | 0.3398  |
| CEU | TBC1D3 | 37573976 | 9.7273  | 8.3576  | 0.4869  |
| CEU | TBC1D3 | 37578976 | 6.8204  | 7.3342  | -0.2059 |
| CEU | TBC1D3 | 37583976 | 5.536   | 6.6519  | -0.4886 |

## 2\_TajimasD\_data

|     |        |          |         |         |         |
|-----|--------|----------|---------|---------|---------|
| CEU | TBC1D3 | 37588976 | 5.3853  | 6.4814  | -0.4913 |
| CEU | TBC1D3 | 37593976 | 5.3865  | 7.1636  | -0.7275 |
| CEU | TBC1D3 | 37598976 | 6.086   | 7.3342  | -0.5001 |
| CEU | TBC1D3 | 37603976 | 6.8202  | 6.6519  | 0.0737  |
| CEU | TBC1D3 | 37608976 | 7.2313  | 5.7991  | 0.7094  |
| CEU | TBC1D3 | 37613976 | 5.6172  | 5.6286  | -0.0058 |
| CEU | TBC1D3 | 37618976 | 7.1866  | 7.3342  | -0.0591 |
| CEU | TBC1D3 | 37623976 | 9.9445  | 8.6987  | 0.4268  |
| CEU | TBC1D3 | 37628976 | 8.0062  | 8.187   | -0.0655 |
| CEU | TBC1D3 | 37633976 | 6.8184  | 8.5281  | -0.5965 |
| CEU | TBC1D3 | 37638976 | 5.8757  | 7.1636  | -0.5272 |
| CEU | TBC1D3 | 37643976 | 7.8439  | 8.3576  | -0.1826 |
| CEU | TBC1D3 | 37648976 | 9.9151  | 9.7221  | 0.0596  |
| CEU | TBC1D3 | 37653976 | 6.6384  | 6.8225  | -0.0788 |
| CEU | TBC1D3 | 37658976 | 5.2233  | 5.7991  | -0.2852 |
| CEU | TBC1D3 | 37663976 | 4.618   | 4.9463  | -0.1872 |
| CEU | TBC1D3 | 37668976 | 6.6089  | 5.7991  | 0.4011  |
| CEU | TBC1D3 | 37673976 | 8.4719  | 7.3342  | 0.4558  |
| CEU | TBC1D3 | 37678976 | 6.1626  | 6.1402  | 0.0105  |
| CEU | TBC1D3 | 37683976 | 4.6285  | 4.2641  | 0.2365  |
| CEU | TBC1D3 | 37688976 | 3.0421  | 4.0935  | -0.707  |
| CEU | TBC1D3 | 37693976 | 5.174   | 5.458   | -0.1485 |
| CEU | TBC1D3 | 37698976 | 7.9779  | 7.1636  | 0.3333  |
| CEU | TBC1D3 | 37703976 | 6.3195  | 5.9697  | 0.1688  |
| CEU | TBC1D3 | 37708976 | 4.9854  | 5.1169  | -0.0728 |
| CEU | TBC1D3 | 37713976 | 5.4912  | 6.1402  | -0.3054 |
| CEU | TBC1D3 | 37718976 | 4.4537  | 5.6286  | -0.5976 |
| CEU | TBC1D3 | 37723976 | 3.5108  | 5.1169  | -0.889  |
| CEU | TBC1D3 | 37728976 | 3.3896  | 5.1169  | -0.9561 |
| CEU | TBC1D3 | 37733976 | 3.831   | 6.6519  | -1.235  |
| CEU | TBC1D3 | 37738976 | 6.571   | 8.0164  | -0.5339 |
| CEU | TBC1D3 | 37743976 | 7.3822  | 8.0164  | -0.2342 |
| CEU | TBC1D3 | 37748976 | 5.8747  | 9.2104  | -1.0839 |
| CEU | TBC1D3 | 37753976 | 3.4933  | 7.3342  | -1.5389 |
| CEU | TBC1D3 | 37758976 | 2.0219  | 4.6052  | -1.5684 |
| CEU | TBC1D3 | 37763976 | 2.0249  | 3.9229  | -1.3238 |
| CEU | TBC1D3 | 37768976 | 4.0536  | 5.9697  | -0.9247 |
| CEU | TBC1D3 | 37773976 | 4.4327  | 7.3342  | -1.1625 |
| CEU | TBC1D3 | 37778976 | 4.0598  | 6.9931  | -1.2273 |
| CEU | TBC1D3 | 37783976 | 3.9107  | 7.3342  | -1.3717 |
| CEU | TBC1D3 | 37788976 | 3.4131  | 6.6519  | -1.418  |
| CEU | TBC1D3 | 37793976 | 3.0039  | 6.1402  | -1.4759 |
| CEU | TBC1D3 | 37798976 | 1.5632  | 6.6519  | -2.2279 |
| CEU | TBC1D3 | 37803976 | 2.2554  | 6.6519  | -1.9249 |
| CEU | TBC1D3 | 37808976 | 4.0037  | 7.6753  | -1.4113 |
| CEU | TBC1D3 | 37813976 | 5.2533  | 9.3809  | -1.3186 |
| CEU | TBC1D3 | 37818976 | 4.824   | 9.2104  | -1.4253 |
| CEU | TBC1D3 | 37823976 | 5.5424  | 7.8459  | -0.8678 |
| CEU | TBC1D3 | 37828976 | 14.2292 | 10.0632 | 1.2467  |

## 2\_TajimasD\_data

|     |        |          |         |         |         |
|-----|--------|----------|---------|---------|---------|
| CEU | TBC1D3 | 37833976 | 17.477  | 11.2571 | 1.676   |
| CEU | TBC1D3 | 37838976 | 9.666   | 7.6753  | 0.7652  |
| CEU | TBC1D3 | 37843976 | 5.4853  | 6.9931  | -0.6309 |
| CEU | TBC1D3 | 37848976 | 4.7978  | 6.3108  | -0.6946 |
| CEU | TBC1D3 | 37853976 | 3.9507  | 4.6052  | -0.3974 |
| CEU | TBC1D3 | 37858976 | 2.5044  | 4.9463  | -1.3926 |
| CEU | TBC1D3 | 37863976 | 1.8365  | 4.9463  | -1.7735 |
| CEU | TBC1D3 | 37868976 | 2.1451  | 4.6052  | -1.4936 |
| CEU | TBC1D3 | 37873976 | 2.8854  | 6.3108  | -1.5727 |
| CEU | TBC1D3 | 37878976 | 3.5512  | 6.4814  | -1.3134 |
| CEU | TBC1D3 | 37883976 | 3.0676  | 5.1169  | -1.1343 |
| CEU | TBC1D3 | 37888976 | 2.6924  | 5.9697  | -1.5817 |
| CEU | TBC1D3 | 37893976 | 2.6372  | 6.4814  | -1.723  |
| CEU | TBC1D3 | 37898976 | 2.7813  | 5.1169  | -1.2928 |
| CEU | TBC1D3 | 37903976 | 2.9763  | 4.6052  | -0.989  |
| CEU | TBC1D3 | 37908976 | 2.7755  | 4.6052  | -1.1109 |
| CEU | TBC1D3 | 37913976 | 2.3653  | 4.2641  | -1.2326 |
| CEU | TBC1D3 | 37918976 | 2.3078  | 4.2641  | -1.2699 |
| CEU | TBC1D3 | 37923976 | 2.1626  | 4.6052  | -1.483  |
| CEU | TBC1D3 | 37928976 | 1.9979  | 5.6286  | -1.8468 |
| CEU | TBC1D3 | 37933976 | 1.9693  | 5.458   | -1.8238 |
| CEU | TBC1D3 | 37938976 | 2.4803  | 5.7991  | -1.6438 |
| CEU | TBC1D3 | 37943976 | 2.3941  | 6.9931  | -1.9243 |
| CEU | TBC1D3 | 37948976 | 1.9557  | 6.8225  | -2.0825 |
| CEU | TBC1D3 | 37953976 | 2.892   | 7.1636  | -1.7486 |
| CEU | TBC1D3 | 37958976 | 3.3989  | 6.4814  | -1.3816 |
| CEU | TBC1D3 | 37963976 | 2.5863  | 5.7991  | -1.5913 |
| CEU | TBC1D3 | 37968976 | 2.2018  | 6.3108  | -1.8865 |
| CEU | TBC1D3 | 37973976 | 3.3486  | 6.6519  | -1.4462 |
| CEU | TBC1D3 | 37978976 | 3.8815  | 8.187   | -1.5598 |
| CEU | TBC1D3 | 37983976 | 3.4453  | 9.2104  | -1.8733 |
| CEU | TBC1D3 | 37988976 | 2.3995  | 6.4814  | -1.8296 |
| CEU | TBC1D3 | 37993976 | 1.2779  | 4.0935  | -1.8933 |
| CEU | TBC1D3 | 37998976 | 1.98    | 5.9697  | -1.9255 |
| CEU | TBC1D3 | 38003976 | 5.4187  | 7.8459  | -0.9144 |
| CEU | TBC1D3 | 38008976 | 5.0289  | 9.5515  | -1.4208 |
| CEU | TBC1D3 | 38013976 | 2.3385  | 10.4043 | -2.3398 |
| CEU | TBC1D3 | 38018976 | 3.4642  | 7.8459  | -1.6506 |
| CEU | TBC1D3 | 38023976 | 8.3847  | 7.8459  | 0.203   |
| CEU | TBC1D3 | 38028976 | 14.563  | 10.5749 | 1.1395  |
| CEU | TBC1D3 | 38033976 | 13.831  | 9.7221  | 1.2698  |
| CEU | TBC1D3 | 38038976 | 9.8947  | 7.8459  | 0.7718  |
| CEU | TBC1D3 | 38043976 | 6.6079  | 7.1636  | -0.2275 |
| CEU | TBC1D3 | 38048976 | 5.4939  | 5.9697  | -0.2296 |
| CEU | TBC1D3 | 38053976 | 7.4399  | 5.6286  | 0.9213  |
| CEU | TBC1D3 | 38058976 | 9.1453  | 6.4814  | 1.194   |
| CEU | TBC1D3 | 38063976 | 12.0839 | 8.8692  | 1.0818  |
| CEU | TBC1D3 | 38068976 | 16.435  | 11.0866 | 1.462   |
| CEU | TBC1D3 | 38073976 | 13.4403 | 10.5749 | 0.8187  |



## 2\_TajimasD\_data

|     |        |          |         |         |         |
|-----|--------|----------|---------|---------|---------|
| CEU | TBC1D3 | 38078976 | 5.8808  | 6.6519  | -0.3376 |
| CEU | TBC1D3 | 38083976 | 6.0439  | 4.9463  | 0.626   |
| CEU | TBC1D3 | 38088976 | 11.1058 | 8.187   | 1.0574  |
| CEU | TBC1D3 | 38093976 | 11.1373 | 9.0398  | 0.6935  |
| CEU | TBC1D3 | 38098976 | 9.2243  | 7.8459  | 0.5193  |
| CEU | TBC1D3 | 38103976 | 11.2298 | 8.3576  | 1.021   |
| CEU | TBC1D3 | 38108976 | 21.3654 | 12.6216 | 2.1154  |
| CEU | TBC1D3 | 38113976 | 24.1704 | 14.1567 | 2.1731  |
| CEU | TBC1D3 | 38118976 | 17.7178 | 11.9394 | 1.4732  |
| CEU | TBC1D3 | 38123976 | 18.1611 | 11.7688 | 1.652   |
| CEU | TBC1D3 | 38128976 | 16.38   | 11.0866 | 1.4469  |
| CEU | TBC1D3 | 38133976 | 10.7749 | 8.6987  | 0.7113  |
| CEU | TBC1D3 | 38138976 | 9.9858  | 9.3809  | 0.1932  |
| CEU | TBC1D3 | 38143976 | 16.3457 | 12.4511 | 0.9544  |
| CEU | TBC1D3 | 38148976 | 19.8021 | 11.5982 | 2.1495  |
| CEU | TBC1D3 | 38153976 | 16.8493 | 10.5749 | 1.7927  |
| CEU | TBC1D3 | 38158976 | 16.5143 | 9.8926  | 2.0134  |
| CEU | TBC1D3 | 38163976 | 20.7365 | 11.9394 | 2.2429  |
| CEU | TBC1D3 | 38168976 | 18.0326 | 12.9627 | 1.1961  |
| CEU | TBC1D3 | 38173976 | 13.3418 | 10.2337 | 0.9157  |
| CEU | TBC1D3 | 38178976 | 13.0606 | 9.5515  | 1.1024  |
| CEU | TBC1D3 | 38183976 | 10.8176 | 9.2104  | 0.5223  |
| CEU | TBC1D3 | 38188976 | 7.2719  | 5.7991  | 0.7295  |
| CEU | TBC1D3 | 38193976 | 7.4611  | 5.9697  | 0.7198  |
| CEU | TBC1D3 | 38198976 | 6.0575  | 7.6753  | -0.6218 |
| CEU | TBC1D3 | 38203976 | 4.3086  | 6.1402  | -0.8619 |
| CEU | TBC1D3 | 38208976 | 6.7856  | 6.6519  | 0.0585  |
| CEU | TBC1D3 | 38213976 | 11.3224 | 8.187   | 1.1359  |
| CEU | TBC1D3 | 38218976 | 12.2358 | 8.0164  | 1.5585  |
| CEU | TBC1D3 | 38223976 | 7.2843  | 5.7991  | 0.7356  |
| CEU | TBC1D3 | 38228976 | 3.4799  | 4.0935  | -0.4126 |
| CEU | TBC1D3 | 38233976 | 2.1319  | 3.9229  | -1.2492 |
| CEU | TBC1D3 | 38238976 | 2.4092  | 6.1402  | -1.7557 |
| CEU | TBC1D3 | 38243976 | 4.0606  | 8.0164  | -1.4611 |
| CEU | TBC1D3 | 38248976 | 5.6291  | 7.5047  | -0.7359 |
| CEU | TBC1D3 | 38253976 | 6.5778  | 7.5047  | -0.3637 |
| CEU | TBC1D3 | 38258976 | 5.8011  | 7.5047  | -0.6684 |
| CEU | TBC1D3 | 38263976 | 2.8877  | 5.1169  | -1.2339 |
| CEU | TBC1D3 | 38268976 | 2.9948  | 5.458   | -1.2877 |
| CEU | TBC1D3 | 38273976 | 3.1585  | 8.187   | -1.8217 |
| CEU | TBC1D3 | 38278976 | 2.3206  | 7.8459  | -2.0815 |
| CEU | TBC1D3 | 38283976 | 1.9749  | 5.458   | -1.8209 |
| CEU | TBC1D3 | 38288976 | 1.4096  | 4.7757  | -1.9797 |
| CEU | TBC1D3 | 38293976 | 1.1707  | 4.9463  | -2.1532 |
| CEU | TBC1D3 | 38298976 | 1.181   | 4.9463  | -2.1473 |
| CEU | TBC1D3 | 38303976 | 1.8099  | 5.9697  | -2.0076 |
| CEU | TBC1D3 | 38308976 | 2.6516  | 8.6987  | -2.0717 |
| CEU | TBC1D3 | 38313976 | 2.0561  | 7.3342  | -2.1148 |
| CEU | TBC1D3 | 38318976 | 1.5523  | 4.2641  | -1.7603 |

## 2\_TajimasD\_data

|     |        |          |        |         |         |
|-----|--------|----------|--------|---------|---------|
| CEU | TBC1D3 | 38323976 | 1.408  | 4.7757  | -1.9807 |
| CEU | TBC1D3 | 38328976 | 0.9126 | 5.1169  | -2.3272 |
| CEU | TBC1D3 | 38333976 | 1.1381 | 5.9697  | -2.3318 |
| CEU | TBC1D3 | 38338976 | 1.3636 | 6.3108  | -2.2714 |
| CEU | TBC1D3 | 38343976 | 2.3906 | 5.6286  | -1.647  |
| CEU | TBC1D3 | 38348976 | 5.3173 | 6.3108  | -0.4561 |
| CEU | TBC1D3 | 38353976 | 7.8452 | 7.6753  | 0.0653  |
| CEU | TBC1D3 | 38358976 | 9.4306 | 8.6987  | 0.2507  |
| CEU | TBC1D3 | 38363976 | 6.9893 | 7.5047  | -0.2022 |
| CEU | TBC1D3 | 38368976 | 4.6908 | 8.3576  | -1.3034 |
| CEU | TBC1D3 | 38373976 | 5.2031 | 10.7454 | -1.56   |
| CEU | TBC1D3 | 38378976 | 4.2837 | 8.3576  | -1.4481 |
| CEU | TBC1D3 | 38383976 | 3.9586 | 6.6519  | -1.1792 |
| CEU | TBC1D3 | 38388976 | 4.2134 | 7.6753  | -1.3307 |
| CEU | TBC1D3 | 38393976 | 3.6716 | 7.5047  | -1.5039 |
| CEU | TBC1D3 | 38398976 | 2.3671 | 6.6519  | -1.876  |
| CEU | TBC1D3 | 38403976 | 2.2544 | 6.6519  | -1.9253 |
| CEU | TBC1D3 | 38408976 | 3.0623 | 5.9697  | -1.4032 |
| CEU | TBC1D3 | 38413976 | 4.1105 | 8.0164  | -1.4427 |
| CEU | TBC1D3 | 38418976 | 4.1816 | 8.3576  | -1.4844 |
| CEU | TBC1D3 | 38423976 | 4.0047 | 6.8225  | -1.2057 |
| CEU | TBC1D3 | 38428976 | 3.8926 | 6.8225  | -1.2537 |
| CEU | TBC1D3 | 38433976 | 2.6906 | 4.9463  | -1.2864 |
| CEU | TBC1D3 | 38438976 | 2.1446 | 4.2641  | -1.3759 |
| CEU | TBC1D3 | 38443976 | 1.9921 | 4.9463  | -1.6848 |
| CEU | TBC1D3 | 38448976 | 1.195  | 4.7757  | -2.106  |
| CEU | TBC1D3 | 38453976 | 1.0223 | 3.9229  | -2.0231 |
| CEU | TBC1D3 | 38458976 | 1.7308 | 4.9463  | -1.8338 |
| CEU | TBC1D3 | 38463976 | 1.5409 | 4.7757  | -1.9025 |
| CEU | TBC1D3 | 38468976 | 1.8992 | 3.7524  | -1.3426 |
| CEU | TBC1D3 | 38473976 | 1.7079 | 3.9229  | -1.5449 |
| CEU | TBC1D3 | 38478976 | 1.373  | 4.0935  | -1.8293 |
| CEU | TBC1D3 | 38483976 | 2.0549 | 4.6052  | -1.5484 |
| CEU | TBC1D3 | 38488976 | 1.3511 | 4.2641  | -1.891  |
| CEU | TBC1D3 | 38493976 | 1.7967 | 4.0935  | -1.5444 |
| CEU | TBC1D3 | 38498976 | 1.8499 | 3.5818  | -1.3053 |
| CEU | TBC1D3 | 38503976 | 1.9845 | 5.2874  | -1.776  |
| CEU | TBC1D3 | 38508976 | 1.6597 | 4.7757  | -1.8326 |
| CHB | TBC1D3 | 37508976 | 8.3929 | 9.9955  | -0.4812 |
| CHB | TBC1D3 | 37513976 | 8.1481 | 9.1484  | -0.3261 |
| CHB | TBC1D3 | 37518976 | 6.2064 | 8.6402  | -0.8366 |
| CHB | TBC1D3 | 37523976 | 4.4339 | 7.2848  | -1.146  |
| CHB | TBC1D3 | 37528976 | 6.2116 | 6.946   | -0.3083 |
| CHB | TBC1D3 | 37533976 | 7.1026 | 7.2848  | -0.0732 |
| CHB | TBC1D3 | 37538976 | 7.0479 | 7.7931  | -0.2816 |
| CHB | TBC1D3 | 37543976 | 5.7892 | 8.8096  | -1.0198 |
| CHB | TBC1D3 | 37548976 | 6.7434 | 7.9625  | -0.4518 |
| CHB | TBC1D3 | 37553976 | 8.0577 | 7.9625  | 0.0353  |
| CHB | TBC1D3 | 37558976 | 4.1097 | 6.0989  | -0.939  |

## 2\_TajimasD\_data

|     |        |          |        |        |         |
|-----|--------|----------|--------|--------|---------|
| CHB | TBC1D3 | 37563976 | 1.1146 | 3.7271 | -1.8979 |
| CHB | TBC1D3 | 37568976 | 5.7609 | 5.2519 | 0.2745  |
| CHB | TBC1D3 | 37573976 | 9.0196 | 8.3013 | 0.2562  |
| CHB | TBC1D3 | 37578976 | 5.625  | 8.1319 | -0.9112 |
| CHB | TBC1D3 | 37583976 | 4.8148 | 6.0989 | -0.6062 |
| CHB | TBC1D3 | 37588976 | 4.6147 | 5.9295 | -0.6365 |
| CHB | TBC1D3 | 37593976 | 4.6762 | 6.6072 | -0.8481 |
| CHB | TBC1D3 | 37598976 | 5.8953 | 6.2684 | -0.1718 |
| CHB | TBC1D3 | 37603976 | 6.4795 | 6.946  | -0.1958 |
| CHB | TBC1D3 | 37608976 | 7.1483 | 8.4708 | -0.463  |
| CHB | TBC1D3 | 37613976 | 5.7164 | 7.6237 | -0.7355 |
| CHB | TBC1D3 | 37618976 | 6.9189 | 8.1319 | -0.4409 |
| CHB | TBC1D3 | 37623976 | 9.6636 | 9.3178 | 0.1108  |
| CHB | TBC1D3 | 37628976 | 7.2501 | 8.1319 | -0.3205 |
| CHB | TBC1D3 | 37633976 | 5.2334 | 7.2848 | -0.8246 |
| CHB | TBC1D3 | 37638976 | 4.4561 | 5.7601 | -0.6479 |
| CHB | TBC1D3 | 37643976 | 6.6739 | 6.7766 | -0.0441 |
| CHB | TBC1D3 | 37648976 | 9.3152 | 8.979  | 0.1115  |
| CHB | TBC1D3 | 37653976 | 6.8211 | 7.7931 | -0.3674 |
| CHB | TBC1D3 | 37658976 | 5.1291 | 5.7601 | -0.3135 |
| CHB | TBC1D3 | 37663976 | 4.6596 | 6.2684 | -0.741  |
| CHB | TBC1D3 | 37668976 | 6.2064 | 7.7931 | -0.5997 |
| CHB | TBC1D3 | 37673976 | 7.3666 | 8.6402 | -0.4378 |
| CHB | TBC1D3 | 37678976 | 5.0434 | 8.3013 | -1.1619 |
| CHB | TBC1D3 | 37683976 | 4.0337 | 6.2684 | -1.0292 |
| CHB | TBC1D3 | 37688976 | 2.9419 | 4.7436 | -1.0628 |
| CHB | TBC1D3 | 37693976 | 4.9638 | 6.6072 | -0.7218 |
| CHB | TBC1D3 | 37698976 | 7.9633 | 7.9625 | 0.0003  |
| CHB | TBC1D3 | 37703976 | 6.5572 | 5.9295 | 0.3039  |
| CHB | TBC1D3 | 37708976 | 5.0653 | 5.5907 | -0.2681 |
| CHB | TBC1D3 | 37713976 | 5.4411 | 6.4378 | -0.4481 |
| CHB | TBC1D3 | 37718976 | 4.7038 | 6.2684 | -0.7206 |
| CHB | TBC1D3 | 37723976 | 3.8296 | 6.946  | -1.3081 |
| CHB | TBC1D3 | 37728976 | 3.4664 | 7.7931 | -1.6353 |
| CHB | TBC1D3 | 37733976 | 2.8054 | 9.1484 | -2.0681 |
| CHB | TBC1D3 | 37738976 | 6.4417 | 9.9955 | -1.0671 |
| CHB | TBC1D3 | 37743976 | 7.9417 | 8.4708 | -0.1852 |
| CHB | TBC1D3 | 37748976 | 4.3819 | 7.9625 | -1.3269 |
| CHB | TBC1D3 | 37753976 | 1.5623 | 6.2684 | -2.1675 |
| CHB | TBC1D3 | 37758976 | 0.9714 | 4.066  | -2.0868 |
| CHB | TBC1D3 | 37763976 | 1.5622 | 3.5577 | -1.5081 |
| CHB | TBC1D3 | 37768976 | 3.3668 | 7.1154 | -1.5394 |
| CHB | TBC1D3 | 37773976 | 3.4321 | 8.1319 | -1.7083 |
| CHB | TBC1D3 | 37778976 | 3.8456 | 7.2848 | -1.3824 |
| CHB | TBC1D3 | 37783976 | 4.2659 | 8.1319 | -1.4052 |
| CHB | TBC1D3 | 37788976 | 4.9806 | 8.4708 | -1.2218 |
| CHB | TBC1D3 | 37793976 | 4.3701 | 7.4543 | -1.214  |
| CHB | TBC1D3 | 37798976 | 1.3183 | 5.9295 | -2.2323 |
| CHB | TBC1D3 | 37803976 | 1.5858 | 7.2848 | -2.2908 |

## 2\_TajimasD\_data

|     |        |          |         |         |         |
|-----|--------|----------|---------|---------|---------|
| CHB | TBC1D3 | 37808976 | 2.2903  | 6.4378  | -1.8649 |
| CHB | TBC1D3 | 37813976 | 3.6929  | 6.6072  | -1.28   |
| CHB | TBC1D3 | 37818976 | 3.6749  | 7.6237  | -1.5228 |
| CHB | TBC1D3 | 37823976 | 5.3832  | 8.6402  | -1.1195 |
| CHB | TBC1D3 | 37828976 | 16.3465 | 11.5202 | 1.2689  |
| CHB | TBC1D3 | 37833976 | 19.8536 | 11.012  | 2.4252  |
| CHB | TBC1D3 | 37838976 | 10.5966 | 8.3013  | 0.8186  |
| CHB | TBC1D3 | 37843976 | 5.6539  | 6.2684  | -0.283  |
| CHB | TBC1D3 | 37848976 | 5.4624  | 5.9295  | -0.2261 |
| CHB | TBC1D3 | 37853976 | 4.4224  | 6.0989  | -0.7914 |
| CHB | TBC1D3 | 37858976 | 2.3566  | 5.9295  | -1.7297 |
| CHB | TBC1D3 | 37863976 | 1.877   | 5.2519  | -1.8202 |
| CHB | TBC1D3 | 37868976 | 2.3145  | 5.4213  | -1.6291 |
| CHB | TBC1D3 | 37873976 | 3.0175  | 6.6072  | -1.5766 |
| CHB | TBC1D3 | 37878976 | 3.8001  | 5.7601  | -0.9738 |
| CHB | TBC1D3 | 37883976 | 3.087   | 5.9295  | -1.3761 |
| CHB | TBC1D3 | 37888976 | 2.2772  | 5.5907  | -1.6906 |
| CHB | TBC1D3 | 37893976 | 1.7767  | 6.2684  | -2.0687 |
| CHB | TBC1D3 | 37898976 | 2.4735  | 8.3013  | -2.0785 |
| CHB | TBC1D3 | 37903976 | 3.2322  | 8.8096  | -1.8831 |
| CHB | TBC1D3 | 37908976 | 2.7573  | 8.3013  | -1.9773 |
| CHB | TBC1D3 | 37913976 | 2.1304  | 5.9295  | -1.8392 |
| CHB | TBC1D3 | 37918976 | 1.85    | 4.4048  | -1.6076 |
| CHB | TBC1D3 | 37923976 | 1.9248  | 4.7436  | -1.6627 |
| CHB | TBC1D3 | 37928976 | 1.7508  | 5.7601  | -1.9919 |
| CHB | TBC1D3 | 37933976 | 1.6647  | 5.5907  | -2.0031 |
| CHB | TBC1D3 | 37938976 | 2.6837  | 6.6072  | -1.7232 |
| CHB | TBC1D3 | 37943976 | 2.4898  | 8.979   | -2.1527 |
| CHB | TBC1D3 | 37948976 | 0.9912  | 8.3013  | -2.6071 |
| CHB | TBC1D3 | 37953976 | 1.6349  | 8.3013  | -2.3776 |
| CHB | TBC1D3 | 37958976 | 2.6821  | 8.6402  | -2.048  |
| CHB | TBC1D3 | 37963976 | 2.3111  | 7.7931  | -2.0719 |
| CHB | TBC1D3 | 37968976 | 2.0554  | 6.946   | -2.0529 |
| CHB | TBC1D3 | 37973976 | 2.6541  | 6.0989  | -1.6261 |
| CHB | TBC1D3 | 37978976 | 2.7251  | 9.1484  | -2.0942 |
| CHB | TBC1D3 | 37983976 | 2.351   | 11.5202 | -2.4107 |
| CHB | TBC1D3 | 37988976 | 1.8085  | 8.8096  | -2.3638 |
| CHB | TBC1D3 | 37993976 | 1.1201  | 6.0989  | -2.3502 |
| CHB | TBC1D3 | 37998976 | 1.5172  | 6.4378  | -2.2125 |
| CHB | TBC1D3 | 38003976 | 4.4291  | 8.4708  | -1.4149 |
| CHB | TBC1D3 | 38008976 | 4.1561  | 11.012  | -1.8805 |
| CHB | TBC1D3 | 38013976 | 1.6669  | 11.1814 | -2.5726 |
| CHB | TBC1D3 | 38018976 | 2.9568  | 8.6402  | -1.9536 |
| CHB | TBC1D3 | 38023976 | 7.901   | 8.8096  | -0.3068 |
| CHB | TBC1D3 | 38028976 | 13.5433 | 9.9955  | 1.0653  |
| CHB | TBC1D3 | 38033976 | 12.6545 | 7.7931  | 1.8374  |
| CHB | TBC1D3 | 38038976 | 8.7796  | 6.0989  | 1.2654  |
| CHB | TBC1D3 | 38043976 | 5.6259  | 5.5907  | 0.018   |
| CHB | TBC1D3 | 38048976 | 4.7599  | 5.9295  | -0.5662 |

## 2\_TajimasD\_data

|     |        |          |         |         |         |
|-----|--------|----------|---------|---------|---------|
| CHB | TBC1D3 | 38053976 | 6.8209  | 7.4543  | -0.2493 |
| CHB | TBC1D3 | 38058976 | 8.019   | 6.6072  | 0.6201  |
| CHB | TBC1D3 | 38063976 | 11.1388 | 7.6237  | 1.3555  |
| CHB | TBC1D3 | 38068976 | 15.8412 | 11.5202 | 1.1361  |
| CHB | TBC1D3 | 38073976 | 12.4483 | 10.1649 | 0.675   |
| CHB | TBC1D3 | 38078976 | 5.2572  | 6.6072  | -0.5929 |
| CHB | TBC1D3 | 38083976 | 5.7636  | 7.1154  | -0.5551 |
| CHB | TBC1D3 | 38088976 | 11.0992 | 10.6731 | 0.1203  |
| CHB | TBC1D3 | 38093976 | 10.6922 | 11.1814 | -0.1323 |
| CHB | TBC1D3 | 38098976 | 8.7594  | 7.9625  | 0.2953  |
| CHB | TBC1D3 | 38103976 | 11.6969 | 8.1319  | 1.2958  |
| CHB | TBC1D3 | 38108976 | 22.7818 | 13.2144 | 2.21    |
| CHB | TBC1D3 | 38113976 | 24.5679 | 14.7391 | 2.0468  |
| CHB | TBC1D3 | 38118976 | 16.649  | 12.5367 | 0.9984  |
| CHB | TBC1D3 | 38123976 | 16.8706 | 11.8591 | 1.2822  |
| CHB | TBC1D3 | 38128976 | 15.0501 | 10.8426 | 1.171   |
| CHB | TBC1D3 | 38133976 | 10.5167 | 8.4708  | 0.7162  |
| CHB | TBC1D3 | 38138976 | 9.8732  | 8.979   | 0.2966  |
| CHB | TBC1D3 | 38143976 | 14.7304 | 11.8591 | 0.7346  |
| CHB | TBC1D3 | 38148976 | 18.4972 | 11.6896 | 1.7654  |
| CHB | TBC1D3 | 38153976 | 15.0767 | 11.3508 | 0.9933  |
| CHB | TBC1D3 | 38158976 | 14.3007 | 11.012  | 0.9021  |
| CHB | TBC1D3 | 38163976 | 19.7231 | 13.5532 | 1.3914  |
| CHB | TBC1D3 | 38168976 | 17.451  | 14.4003 | 0.6495  |
| CHB | TBC1D3 | 38173976 | 13.2972 | 10.5037 | 0.8009  |
| CHB | TBC1D3 | 38178976 | 12.4367 | 7.6237  | 1.856   |
| CHB | TBC1D3 | 38183976 | 10.1662 | 6.6072  | 1.5632  |
| CHB | TBC1D3 | 38188976 | 7.3331  | 6.946   | 0.1625  |
| CHB | TBC1D3 | 38193976 | 7.102   | 8.6402  | -0.5287 |
| CHB | TBC1D3 | 38198976 | 5.5075  | 9.8261  | -1.3176 |
| CHB | TBC1D3 | 38203976 | 4.8951  | 8.979   | -1.3548 |
| CHB | TBC1D3 | 38208976 | 6.8342  | 6.6072  | 0.0997  |
| CHB | TBC1D3 | 38213976 | 9.9937  | 6.0989  | 1.8385  |
| CHB | TBC1D3 | 38218976 | 11.7141 | 6.7766  | 2.1195  |
| CHB | TBC1D3 | 38223976 | 7.5328  | 6.2684  | 0.5823  |
| CHB | TBC1D3 | 38228976 | 3.9069  | 5.4213  | -0.7941 |
| CHB | TBC1D3 | 38233976 | 2.1473  | 4.066   | -1.2938 |
| CHB | TBC1D3 | 38238976 | 2.3229  | 6.4378  | -1.8502 |
| CHB | TBC1D3 | 38243976 | 4.1738  | 8.8096  | -1.5652 |
| CHB | TBC1D3 | 38248976 | 5.1946  | 6.946   | -0.7352 |
| CHB | TBC1D3 | 38253976 | 7.2024  | 6.4378  | 0.3438  |
| CHB | TBC1D3 | 38258976 | 6.0971  | 6.4378  | -0.1532 |
| CHB | TBC1D3 | 38263976 | 2.5924  | 5.7601  | -1.5738 |
| CHB | TBC1D3 | 38268976 | 3.3181  | 5.9295  | -1.2642 |
| CHB | TBC1D3 | 38273976 | 3.1232  | 7.4543  | -1.7048 |
| CHB | TBC1D3 | 38278976 | 1.2897  | 7.4543  | -2.4266 |
| CHB | TBC1D3 | 38283976 | 1.5644  | 5.5907  | -2.0543 |
| CHB | TBC1D3 | 38288976 | 1.7323  | 4.5742  | -1.7305 |
| CHB | TBC1D3 | 38293976 | 0.7944  | 4.2354  | -2.2401 |

## 2\_TajimasD\_data

|     |        |          |         |         |         |
|-----|--------|----------|---------|---------|---------|
| CHB | TBC1D3 | 38298976 | 0.9452  | 4.4048  | -2.177  |
| CHB | TBC1D3 | 38303976 | 1.238   | 4.2354  | -1.9513 |
| CHB | TBC1D3 | 38308976 | 1.09    | 6.0989  | -2.3644 |
| CHB | TBC1D3 | 38313976 | 0.972   | 5.5907  | -2.3566 |
| CHB | TBC1D3 | 38318976 | 1.333   | 5.0825  | -2.0816 |
| CHB | TBC1D3 | 38323976 | 0.9221  | 4.4048  | -2.1915 |
| CHB | TBC1D3 | 38328976 | 0.4135  | 5.0825  | -2.5921 |
| CHB | TBC1D3 | 38333976 | 0.696   | 5.7601  | -2.516  |
| CHB | TBC1D3 | 38338976 | 0.94    | 4.913   | -2.2725 |
| CHB | TBC1D3 | 38343976 | 2.0712  | 6.946   | -2.0462 |
| CHB | TBC1D3 | 38348976 | 4.068   | 7.6237  | -1.3712 |
| CHB | TBC1D3 | 38353976 | 7.1504  | 7.6237  | -0.1825 |
| CHB | TBC1D3 | 38358976 | 9.4934  | 7.6237  | 0.721   |
| CHB | TBC1D3 | 38363976 | 6.6611  | 6.4378  | 0.1004  |
| CHB | TBC1D3 | 38368976 | 6.2399  | 6.6072  | -0.1613 |
| CHB | TBC1D3 | 38373976 | 7.8563  | 8.3013  | -0.1587 |
| CHB | TBC1D3 | 38378976 | 6.6307  | 7.1154  | -0.1991 |
| CHB | TBC1D3 | 38383976 | 6.5216  | 5.4213  | 0.577   |
| CHB | TBC1D3 | 38388976 | 6.3021  | 6.946   | -0.2703 |
| CHB | TBC1D3 | 38393976 | 4.2602  | 7.2848  | -1.2158 |
| CHB | TBC1D3 | 38398976 | 2.8327  | 4.5742  | -1.0604 |
| CHB | TBC1D3 | 38403976 | 3.6054  | 5.0825  | -0.8201 |
| CHB | TBC1D3 | 38408976 | 4.2433  | 7.1154  | -1.1795 |
| CHB | TBC1D3 | 38413976 | 5.7379  | 7.1154  | -0.5657 |
| CHB | TBC1D3 | 38418976 | 6.4245  | 6.4378  | -0.006  |
| CHB | TBC1D3 | 38423976 | 6.6269  | 6.2684  | 0.1651  |
| CHB | TBC1D3 | 38428976 | 5.4068  | 4.913   | 0.2825  |
| CHB | TBC1D3 | 38433976 | 2.8009  | 4.066   | -0.8531 |
| CHB | TBC1D3 | 38438976 | 3.1222  | 4.913   | -1.0243 |
| CHB | TBC1D3 | 38443976 | 2.7879  | 3.7271  | -0.6823 |
| CHB | TBC1D3 | 38448976 | 1.2553  | 2.5412  | -1.2841 |
| CHB | TBC1D3 | 38453976 | 1.4765  | 2.7106  | -1.1694 |
| CHB | TBC1D3 | 38458976 | 2.9977  | 4.7436  | -1.0299 |
| CHB | TBC1D3 | 38463976 | 2.3929  | 5.2519  | -1.5419 |
| CHB | TBC1D3 | 38468976 | 1.6374  | 3.8965  | -1.5801 |
| CHB | TBC1D3 | 38473976 | 2.055   | 4.5742  | -1.534  |
| CHB | TBC1D3 | 38478976 | 2.197   | 4.5742  | -1.4475 |
| CHB | TBC1D3 | 38483976 | 3.1076  | 4.7436  | -0.965  |
| CHB | TBC1D3 | 38488976 | 1.7198  | 3.8965  | -1.5224 |
| CHB | TBC1D3 | 38493976 | 1.9863  | 3.5577  | -1.1876 |
| CHB | TBC1D3 | 38498976 | 3.1116  | 4.5742  | -0.8906 |
| CHB | TBC1D3 | 38503976 | 1.9256  | 4.5742  | -1.6128 |
| CHB | TBC1D3 | 38508976 | 1.0607  | 6.2684  | -2.3985 |
| YRI | TBC1D3 | 37508976 | 13.0194 | 11.7644 | 0.3224  |
| YRI | TBC1D3 | 37513976 | 11.6919 | 13.1089 | -0.3287 |
| YRI | TBC1D3 | 37518976 | 10.1726 | 12.2685 | -0.5176 |
| YRI | TBC1D3 | 37523976 | 9.0256  | 10.4199 | -0.4014 |
| YRI | TBC1D3 | 37528976 | 11.0202 | 12.1005 | -0.2703 |
| YRI | TBC1D3 | 37533976 | 11.0704 | 12.7727 | -0.4047 |

## 2\_TajimasD\_data

|     |        |          |         |         |         |
|-----|--------|----------|---------|---------|---------|
| YRI | TBC1D3 | 37538976 | 11.634  | 15.4617 | -0.759  |
| YRI | TBC1D3 | 37543976 | 11.7454 | 16.6382 | -0.9046 |
| YRI | TBC1D3 | 37548976 | 11.3417 | 13.7811 | -0.5397 |
| YRI | TBC1D3 | 37553976 | 12.4642 | 12.9408 | -0.1119 |
| YRI | TBC1D3 | 37558976 | 7.6057  | 10.5879 | -0.8457 |
| YRI | TBC1D3 | 37563976 | 2.9087  | 7.5628  | -1.8017 |
| YRI | TBC1D3 | 37568976 | 8.5007  | 9.9157  | -0.4266 |
| YRI | TBC1D3 | 37573976 | 13.1321 | 12.7727 | 0.0854  |
| YRI | TBC1D3 | 37578976 | 10.0035 | 11.9324 | -0.489  |
| YRI | TBC1D3 | 37583976 | 8.9542  | 10.5879 | -0.4633 |
| YRI | TBC1D3 | 37588976 | 8.0738  | 10.2518 | -0.6366 |
| YRI | TBC1D3 | 37593976 | 7.3244  | 12.1005 | -1.1949 |
| YRI | TBC1D3 | 37598976 | 7.8549  | 11.9324 | -1.0336 |
| YRI | TBC1D3 | 37603976 | 10.165  | 11.0921 | -0.2517 |
| YRI | TBC1D3 | 37608976 | 11.7589 | 11.0921 | 0.181   |
| YRI | TBC1D3 | 37613976 | 8.9259  | 10.0837 | -0.3437 |
| YRI | TBC1D3 | 37618976 | 11.0752 | 10.5879 | 0.1382  |
| YRI | TBC1D3 | 37623976 | 13.7957 | 11.2602 | 0.6788  |
| YRI | TBC1D3 | 37628976 | 10.2998 | 11.7644 | -0.3763 |
| YRI | TBC1D3 | 37633976 | 8.5504  | 12.9408 | -1.0309 |
| YRI | TBC1D3 | 37638976 | 8.4627  | 13.445  | -1.1283 |
| YRI | TBC1D3 | 37643976 | 10.4605 | 14.6214 | -0.8702 |
| YRI | TBC1D3 | 37648976 | 11.8529 | 14.7895 | -0.6075 |
| YRI | TBC1D3 | 37653976 | 8.7173  | 11.7644 | -0.7828 |
| YRI | TBC1D3 | 37658976 | 6.8756  | 9.0754  | -0.7201 |
| YRI | TBC1D3 | 37663976 | 6.6318  | 9.0754  | -0.7999 |
| YRI | TBC1D3 | 37668976 | 9.1073  | 11.9324 | -0.7162 |
| YRI | TBC1D3 | 37673976 | 12.1771 | 14.7895 | -0.5404 |
| YRI | TBC1D3 | 37678976 | 10.0566 | 12.4366 | -0.5802 |
| YRI | TBC1D3 | 37683976 | 7.2269  | 8.9073  | -0.5597 |
| YRI | TBC1D3 | 37688976 | 4.8473  | 6.5544  | -0.7526 |
| YRI | TBC1D3 | 37693976 | 8.0184  | 7.5628  | 0.1764  |
| YRI | TBC1D3 | 37698976 | 10.8306 | 10.4199 | 0.1182  |
| YRI | TBC1D3 | 37703976 | 7.6795  | 8.4031  | -0.2543 |
| YRI | TBC1D3 | 37708976 | 6.4041  | 7.5628  | -0.4486 |
| YRI | TBC1D3 | 37713976 | 7.8049  | 9.9157  | -0.6364 |
| YRI | TBC1D3 | 37718976 | 7.9087  | 10.4199 | -0.7229 |
| YRI | TBC1D3 | 37723976 | 7.4031  | 8.5712  | -0.4031 |
| YRI | TBC1D3 | 37728976 | 7.2759  | 8.235   | -0.3434 |
| YRI | TBC1D3 | 37733976 | 6.7025  | 11.2602 | -1.2201 |
| YRI | TBC1D3 | 37738976 | 9.916   | 13.445  | -0.7992 |
| YRI | TBC1D3 | 37743976 | 11.303  | 11.7644 | -0.1185 |
| YRI | TBC1D3 | 37748976 | 11.5787 | 10.756  | 0.2299  |
| YRI | TBC1D3 | 37753976 | 9.8269  | 12.4366 | -0.6362 |
| YRI | TBC1D3 | 37758976 | 5.1949  | 10.5879 | -1.5294 |
| YRI | TBC1D3 | 37763976 | 3.5852  | 7.8989  | -1.6048 |
| YRI | TBC1D3 | 37768976 | 8.1246  | 10.5879 | -0.6986 |
| YRI | TBC1D3 | 37773976 | 8.663   | 10.756  | -0.5849 |
| YRI | TBC1D3 | 37778976 | 8.1722  | 10.756  | -0.722  |

## 2\_TajimasD\_data

|     |        |          |         |         |         |
|-----|--------|----------|---------|---------|---------|
| YRI | TBC1D3 | 37783976 | 9.4102  | 12.1005 | -0.6731 |
| YRI | TBC1D3 | 37788976 | 8.4662  | 11.7644 | -0.8473 |
| YRI | TBC1D3 | 37793976 | 7.9498  | 10.756  | -0.7842 |
| YRI | TBC1D3 | 37798976 | 5.8706  | 8.9073  | -1.0114 |
| YRI | TBC1D3 | 37803976 | 6.9107  | 10.0837 | -0.9418 |
| YRI | TBC1D3 | 37808976 | 6.848   | 12.1005 | -1.3141 |
| YRI | TBC1D3 | 37813976 | 6.4018  | 13.1089 | -1.5558 |
| YRI | TBC1D3 | 37818976 | 7.0253  | 14.1172 | -1.5335 |
| YRI | TBC1D3 | 37823976 | 7.7238  | 13.1089 | -1.2492 |
| YRI | TBC1D3 | 37828976 | 15.4791 | 12.7727 | 0.6434  |
| YRI | TBC1D3 | 37833976 | 17.6239 | 12.4366 | 1.2647  |
| YRI | TBC1D3 | 37838976 | 9.7092  | 10.0837 | -0.1112 |
| YRI | TBC1D3 | 37843976 | 6.7761  | 9.5795  | -0.8728 |
| YRI | TBC1D3 | 37848976 | 7.082   | 9.5795  | -0.7776 |
| YRI | TBC1D3 | 37853976 | 5.9417  | 8.9073  | -0.9877 |
| YRI | TBC1D3 | 37858976 | 5.5073  | 7.5628  | -0.7957 |
| YRI | TBC1D3 | 37863976 | 4.8862  | 6.3864  | -0.6771 |
| YRI | TBC1D3 | 37868976 | 3.8889  | 7.3947  | -1.3853 |
| YRI | TBC1D3 | 37873976 | 5.4459  | 9.7476  | -1.3178 |
| YRI | TBC1D3 | 37878976 | 5.0289  | 9.5795  | -1.4167 |
| YRI | TBC1D3 | 37883976 | 3.7363  | 9.9157  | -1.8631 |
| YRI | TBC1D3 | 37888976 | 4.5556  | 9.7476  | -1.5905 |
| YRI | TBC1D3 | 37893976 | 5.7702  | 8.7392  | -1.0064 |
| YRI | TBC1D3 | 37898976 | 7.2692  | 11.7644 | -1.1548 |
| YRI | TBC1D3 | 37903976 | 9.0915  | 13.7811 | -1.0375 |
| YRI | TBC1D3 | 37908976 | 9.3531  | 12.7727 | -0.813  |
| YRI | TBC1D3 | 37913976 | 7.278   | 11.4282 | -1.0957 |
| YRI | TBC1D3 | 37918976 | 5.5813  | 9.5795  | -1.2448 |
| YRI | TBC1D3 | 37923976 | 6.2915  | 10.0837 | -1.1256 |
| YRI | TBC1D3 | 37928976 | 8.332   | 10.756  | -0.6774 |
| YRI | TBC1D3 | 37933976 | 7.233   | 8.9073  | -0.5576 |
| YRI | TBC1D3 | 37938976 | 7.8254  | 9.5795  | -0.5461 |
| YRI | TBC1D3 | 37943976 | 9.0568  | 9.9157  | -0.259  |
| YRI | TBC1D3 | 37948976 | 6.6572  | 9.4115  | -0.8717 |
| YRI | TBC1D3 | 37953976 | 9.9479  | 12.9408 | -0.7028 |
| YRI | TBC1D3 | 37958976 | 10.7379 | 13.445  | -0.6131 |
| YRI | TBC1D3 | 37963976 | 7.5644  | 10.2518 | -0.7855 |
| YRI | TBC1D3 | 37968976 | 7.226   | 9.7476  | -0.7725 |
| YRI | TBC1D3 | 37973976 | 8.0107  | 9.7476  | -0.5321 |
| YRI | TBC1D3 | 37978976 | 9.7966  | 11.2602 | -0.3918 |
| YRI | TBC1D3 | 37983976 | 10.0458 | 13.445  | -0.7698 |
| YRI | TBC1D3 | 37988976 | 8.3371  | 12.2685 | -0.9709 |
| YRI | TBC1D3 | 37993976 | 6.5035  | 10.0837 | -1.0627 |
| YRI | TBC1D3 | 37998976 | 8.2771  | 9.5795  | -0.4055 |
| YRI | TBC1D3 | 38003976 | 12.3101 | 13.1089 | -0.1853 |
| YRI | TBC1D3 | 38008976 | 14.7478 | 16.9743 | -0.4038 |
| YRI | TBC1D3 | 38013976 | 13.5809 | 14.7895 | -0.25   |
| YRI | TBC1D3 | 38018976 | 9.7915  | 9.7476  | 0.0134  |
| YRI | TBC1D3 | 38023976 | 10.2094 | 10.924  | -0.1968 |



## 2\_TajimasD\_data

|     |        |          |         |         |         |
|-----|--------|----------|---------|---------|---------|
| YRI | TBC1D3 | 38028976 | 13.5697 | 14.7895 | -0.2523 |
| YRI | TBC1D3 | 38033976 | 11.0241 | 11.9324 | -0.2303 |
| YRI | TBC1D3 | 38038976 | 9.0039  | 9.2434  | -0.0771 |
| YRI | TBC1D3 | 38043976 | 7.6244  | 8.5712  | -0.3267 |
| YRI | TBC1D3 | 38048976 | 7.6153  | 8.5712  | -0.3299 |
| YRI | TBC1D3 | 38053976 | 9.3716  | 10.924  | -0.4276 |
| YRI | TBC1D3 | 38058976 | 7.2484  | 11.0921 | -1.0436 |
| YRI | TBC1D3 | 38063976 | 8.7549  | 12.4366 | -0.8976 |
| YRI | TBC1D3 | 38068976 | 13.5762 | 16.4701 | -0.5402 |
| YRI | TBC1D3 | 38073976 | 13.225  | 16.4701 | -0.6058 |
| YRI | TBC1D3 | 38078976 | 8.7182  | 13.2769 | -1.0448 |
| YRI | TBC1D3 | 38083976 | 7.9219  | 11.9324 | -1.0167 |
| YRI | TBC1D3 | 38088976 | 12.7008 | 14.2853 | -0.3388 |
| YRI | TBC1D3 | 38093976 | 12.8297 | 14.1172 | -0.2784 |
| YRI | TBC1D3 | 38098976 | 10.239  | 14.7895 | -0.9414 |
| YRI | TBC1D3 | 38103976 | 12.1329 | 16.6382 | -0.8329 |
| YRI | TBC1D3 | 38108976 | 21.5984 | 18.6549 | 0.4876  |
| YRI | TBC1D3 | 38113976 | 24.658  | 18.4868 | 1.0313  |
| YRI | TBC1D3 | 38118976 | 19.242  | 15.4617 | 0.7496  |
| YRI | TBC1D3 | 38123976 | 20.3488 | 16.9743 | 0.612   |
| YRI | TBC1D3 | 38128976 | 18.9838 | 17.4785 | 0.2655  |
| YRI | TBC1D3 | 38133976 | 12.8219 | 14.6214 | -0.3763 |
| YRI | TBC1D3 | 38138976 | 11.7457 | 14.7895 | -0.6297 |
| YRI | TBC1D3 | 38143976 | 18.3294 | 17.1423 | 0.2133  |
| YRI | TBC1D3 | 38148976 | 19.3135 | 16.134  | 0.6054  |
| YRI | TBC1D3 | 38153976 | 17.0683 | 15.1256 | 0.3934  |
| YRI | TBC1D3 | 38158976 | 17.6327 | 16.6382 | 0.1839  |
| YRI | TBC1D3 | 38163976 | 20.6212 | 20.5036 | 0.0178  |
| YRI | TBC1D3 | 38168976 | 19.359  | 22.3523 | -0.4166 |
| YRI | TBC1D3 | 38173976 | 14.0062 | 18.823  | -0.7911 |
| YRI | TBC1D3 | 38178976 | 11.504  | 15.7978 | -0.8341 |
| YRI | TBC1D3 | 38183976 | 9.1671  | 15.6298 | -1.2684 |
| YRI | TBC1D3 | 38188976 | 8.623   | 13.2769 | -1.0666 |
| YRI | TBC1D3 | 38193976 | 10.9502 | 13.9492 | -0.6559 |
| YRI | TBC1D3 | 38198976 | 13.5757 | 15.9659 | -0.4597 |
| YRI | TBC1D3 | 38203976 | 11.0204 | 14.7895 | -0.7797 |
| YRI | TBC1D3 | 38208976 | 8.0705  | 12.1005 | -1.0082 |
| YRI | TBC1D3 | 38213976 | 11.161  | 12.2685 | -0.2735 |
| YRI | TBC1D3 | 38218976 | 14.2721 | 13.7811 | 0.1086  |
| YRI | TBC1D3 | 38223976 | 11.9579 | 14.1172 | -0.4669 |
| YRI | TBC1D3 | 38228976 | 7.2854  | 13.1089 | -1.3509 |
| YRI | TBC1D3 | 38233976 | 5.4203  | 11.2602 | -1.5634 |
| YRI | TBC1D3 | 38238976 | 5.8055  | 11.2602 | -1.4602 |
| YRI | TBC1D3 | 38243976 | 7.3731  | 10.2518 | -0.8414 |
| YRI | TBC1D3 | 38248976 | 6.1884  | 8.7392  | -0.8647 |
| YRI | TBC1D3 | 38253976 | 8.1337  | 9.9157  | -0.5373 |
| YRI | TBC1D3 | 38258976 | 9.119   | 10.2518 | -0.3311 |
| YRI | TBC1D3 | 38263976 | 5.4323  | 9.2434  | -1.2265 |
| YRI | TBC1D3 | 38268976 | 5.6834  | 9.4115  | -1.1799 |

## 2\_TajimasD\_data

|     |        |          |         |         |         |
|-----|--------|----------|---------|---------|---------|
| YRI | TBC1D3 | 38273976 | 7.0011  | 11.0921 | -1.1107 |
| YRI | TBC1D3 | 38278976 | 7.7768  | 12.4366 | -1.1361 |
| YRI | TBC1D3 | 38283976 | 5.0099  | 9.0754  | -1.3308 |
| YRI | TBC1D3 | 38288976 | 3.9823  | 7.3947  | -1.3484 |
| YRI | TBC1D3 | 38293976 | 5.7034  | 10.4199 | -1.3577 |
| YRI | TBC1D3 | 38298976 | 6.0954  | 12.4366 | -1.546  |
| YRI | TBC1D3 | 38303976 | 6.9458  | 12.9408 | -1.4077 |
| YRI | TBC1D3 | 38308976 | 7.4531  | 13.9492 | -1.4207 |
| YRI | TBC1D3 | 38313976 | 5.3318  | 11.9324 | -1.6732 |
| YRI | TBC1D3 | 38318976 | 4.9665  | 8.7392  | -1.2788 |
| YRI | TBC1D3 | 38323976 | 4.7709  | 7.5628  | -1.0808 |
| YRI | TBC1D3 | 38328976 | 5.828   | 10.5879 | -1.3499 |
| YRI | TBC1D3 | 38333976 | 6.6088  | 11.7644 | -1.3245 |
| YRI | TBC1D3 | 38338976 | 7.1233  | 11.0921 | -1.0776 |
| YRI | TBC1D3 | 38343976 | 7.526   | 10.924  | -0.9359 |
| YRI | TBC1D3 | 38348976 | 7.4999  | 10.2518 | -0.8043 |
| YRI | TBC1D3 | 38353976 | 10.1449 | 11.0921 | -0.2572 |
| YRI | TBC1D3 | 38358976 | 12.8114 | 12.9408 | -0.0304 |
| YRI | TBC1D3 | 38363976 | 9.8771  | 11.7644 | -0.4849 |
| YRI | TBC1D3 | 38368976 | 6.3711  | 10.756  | -1.2253 |
| YRI | TBC1D3 | 38373976 | 8.0901  | 12.6047 | -1.0868 |
| YRI | TBC1D3 | 38378976 | 6.9075  | 10.924  | -1.1062 |
| YRI | TBC1D3 | 38383976 | 5.2237  | 10.2518 | -1.4696 |
| YRI | TBC1D3 | 38388976 | 5.8102  | 11.2602 | -1.459  |
| YRI | TBC1D3 | 38393976 | 4.4651  | 9.9157  | -1.6434 |
| YRI | TBC1D3 | 38398976 | 3.3778  | 8.7392  | -1.8174 |
| YRI | TBC1D3 | 38403976 | 4.9733  | 10.756  | -1.616  |
| YRI | TBC1D3 | 38408976 | 4.7283  | 9.5795  | -1.5103 |
| YRI | TBC1D3 | 38413976 | 5.2146  | 8.5712  | -1.1584 |
| YRI | TBC1D3 | 38418976 | 5.7241  | 9.4115  | -1.167  |
| YRI | TBC1D3 | 38423976 | 5.154   | 8.7392  | -1.2153 |
| YRI | TBC1D3 | 38428976 | 5.3191  | 8.4031  | -1.0839 |
| YRI | TBC1D3 | 38433976 | 4.0798  | 7.8989  | -1.4208 |
| YRI | TBC1D3 | 38438976 | 3.6723  | 7.5628  | -1.5061 |
| YRI | TBC1D3 | 38443976 | 3.9804  | 7.2267  | -1.3099 |
| YRI | TBC1D3 | 38448976 | 2.7187  | 6.7225  | -1.7252 |
| YRI | TBC1D3 | 38453976 | 2.918   | 6.5544  | -1.6032 |
| YRI | TBC1D3 | 38458976 | 5.3889  | 8.067   | -0.9773 |
| YRI | TBC1D3 | 38463976 | 4.5022  | 7.5628  | -1.1848 |
| YRI | TBC1D3 | 38468976 | 4.3338  | 7.2267  | -1.1673 |
| YRI | TBC1D3 | 38473976 | 3.8822  | 7.5628  | -1.4249 |
| YRI | TBC1D3 | 38478976 | 2.3393  | 6.8906  | -1.9178 |
| YRI | TBC1D3 | 38483976 | 3.867   | 7.3947  | -1.394  |
| YRI | TBC1D3 | 38488976 | 2.7525  | 7.3947  | -1.8344 |
| YRI | TBC1D3 | 38493976 | 2.4175  | 7.0586  | -1.9133 |
| YRI | TBC1D3 | 38498976 | 3.5654  | 7.0586  | -1.4401 |
| YRI | TBC1D3 | 38503976 | 3.9964  | 7.8989  | -1.4518 |
| YRI | TBC1D3 | 38508976 | 3.7654  | 9.9157  | -1.8543 |
| CEU | TBC1D3 | 37562693 | 1.2694  | 3.2407  | -1.6164 |

## 2\_TajimasD\_data

|     |        |          |         |         |         |
|-----|--------|----------|---------|---------|---------|
| CEU | TBC1D3 | 37567693 | 3.9489  | 4.4346  | -0.3047 |
| CEU | TBC1D3 | 37572693 | 9.1095  | 8.187   | 0.3342  |
| CEU | TBC1D3 | 37577693 | 8.5432  | 7.8459  | 0.2627  |
| CEU | TBC1D3 | 37582693 | 5.4603  | 6.4814  | -0.4577 |
| CEU | TBC1D3 | 37587693 | 4.9221  | 6.3108  | -0.6376 |
| CEU | TBC1D3 | 37592693 | 4.8877  | 6.6519  | -0.7724 |
| CEU | TBC1D3 | 37597693 | 5.1676  | 6.9931  | -0.7638 |
| CEU | TBC1D3 | 37602693 | 6.6568  | 6.8225  | -0.0709 |
| CEU | TBC1D3 | 37607693 | 7.4313  | 6.3108  | 0.5144  |
| CEU | TBC1D3 | 37612693 | 7.0971  | 6.3108  | 0.361   |
| CEU | TBC1D3 | 37617693 | 6.6996  | 6.8225  | -0.0526 |
| CEU | TBC1D3 | 37622693 | 9.227   | 8.0164  | 0.4471  |
| CEU | TBC1D3 | 37627693 | 8.4191  | 8.187   | 0.0841  |
| CEU | TBC1D3 | 37632693 | 6.3274  | 7.6753  | -0.5181 |
| CEU | TBC1D3 | 37637693 | 6.5898  | 7.5047  | -0.359  |
| CEU | TBC1D3 | 37642693 | 6.7493  | 8.6987  | -0.6679 |
| CEU | TBC1D3 | 37647693 | 10.5457 | 10.4043 | 0.041   |
| CEU | TBC1D3 | 37652693 | 8.7339  | 8.0164  | 0.265   |
| CEU | TBC1D3 | 37657693 | 3.8033  | 4.9463  | -0.6519 |
| CEU | TBC1D3 | 37662693 | 4.8068  | 4.9463  | -0.0796 |
| CEU | TBC1D3 | 37667693 | 7.4704  | 5.9697  | 0.7243  |
| CEU | TBC1D3 | 37672693 | 8.5193  | 7.1636  | 0.555   |
| CEU | TBC1D3 | 37677693 | 5.544   | 6.1402  | -0.2806 |
| CEU | TBC1D3 | 37682693 | 4.2313  | 4.6052  | -0.227  |
| CEU | TBC1D3 | 37687693 | 3.9029  | 4.2641  | -0.2345 |
| CEU | TBC1D3 | 37692693 | 3.6005  | 4.4346  | -0.5233 |
| CEU | TBC1D3 | 37697693 | 7.8475  | 6.8225  | 0.4386  |
| CEU | TBC1D3 | 37702693 | 8.054   | 6.8225  | 0.527   |
| CEU | TBC1D3 | 37707693 | 5.4319  | 5.7991  | -0.1819 |
| CEU | TBC1D3 | 37712693 | 5.6551  | 6.4814  | -0.3704 |
| CEU | TBC1D3 | 37717693 | 4.2954  | 5.6286  | -0.6781 |
| CEU | TBC1D3 | 37722693 | 3.3059  | 4.7757  | -0.8644 |
| CEU | TBC1D3 | 37727693 | 2.9256  | 4.2641  | -0.8689 |
| CEU | TBC1D3 | 37732693 | 3.5737  | 5.9697  | -1.1563 |
| CEU | TBC1D3 | 37737693 | 7.1738  | 8.8692  | -0.5705 |
| CEU | TBC1D3 | 37742693 | 7.7699  | 8.5281  | -0.2645 |
| CEU | TBC1D3 | 37747693 | 5.7275  | 9.0398  | -1.0951 |
| CEU | TBC1D3 | 37752693 | 3.1348  | 7.3342  | -1.6826 |
| CEU | TBC1D3 | 37757693 | 2.0447  | 4.4346  | -1.4995 |
| CEU | TBC1D3 | 37762693 | 2.5504  | 4.2641  | -1.1124 |
| CEU | TBC1D3 | 37767693 | 3.9629  | 5.7991  | -0.9095 |
| CEU | TBC1D3 | 37772693 | 4.3723  | 6.6519  | -0.9981 |
| CEU | TBC1D3 | 37777693 | 3.9878  | 7.1636  | -1.3    |
| CEU | TBC1D3 | 37782693 | 3.9217  | 7.6753  | -1.4428 |
| CEU | TBC1D3 | 37787693 | 3.3803  | 6.8225  | -1.4729 |
| CEU | TBC1D3 | 37792693 | 2.9734  | 5.7991  | -1.3995 |
| CEU | TBC1D3 | 37797693 | 1.7052  | 6.4814  | -2.1408 |
| CEU | TBC1D3 | 37802693 | 1.6687  | 6.8225  | -2.2053 |
| CEU | TBC1D3 | 37807693 | 3.3931  | 6.6519  | -1.4268 |

## 2\_TajimasD\_data

|     |        |          |         |         |         |
|-----|--------|----------|---------|---------|---------|
| CEU | TBC1D3 | 37812693 | 5.6498  | 9.3809  | -1.1919 |
| CEU | TBC1D3 | 37817693 | 5.2748  | 9.8926  | -1.4041 |
| CEU | TBC1D3 | 37822693 | 4.1618  | 7.6753  | -1.3505 |
| CEU | TBC1D3 | 37827693 | 10.4809 | 9.0398  | 0.4765  |
| CEU | TBC1D3 | 37832693 | 17.8439 | 11.5982 | 1.6364  |
| CEU | TBC1D3 | 37837693 | 12.3546 | 8.5281  | 1.3351  |
| CEU | TBC1D3 | 37842693 | 5.3614  | 5.9697  | -0.2936 |
| CEU | TBC1D3 | 37847693 | 4.9645  | 6.8225  | -0.795  |
| CEU | TBC1D3 | 37852693 | 4.939   | 5.2874  | -0.1873 |
| CEU | TBC1D3 | 37857693 | 3.6003  | 5.1169  | -0.8395 |
| CEU | TBC1D3 | 37862693 | 1.8592  | 5.6286  | -1.9173 |
| CEU | TBC1D3 | 37867693 | 2.3094  | 4.9463  | -1.5038 |
| CEU | TBC1D3 | 37872693 | 3.2327  | 5.9697  | -1.3209 |
| CEU | TBC1D3 | 37877693 | 3.5512  | 6.4814  | -1.3134 |
| CEU | TBC1D3 | 37882693 | 2.9897  | 5.2874  | -1.2355 |
| CEU | TBC1D3 | 37887693 | 2.0183  | 4.9463  | -1.6698 |
| CEU | TBC1D3 | 37892693 | 2.2375  | 5.6286  | -1.7249 |
| CEU | TBC1D3 | 37897693 | 2.0012  | 5.458   | -1.8071 |
| CEU | TBC1D3 | 37902693 | 3.1033  | 5.7991  | -1.3352 |
| CEU | TBC1D3 | 37907693 | 4.2197  | 5.1169  | -0.4966 |
| CEU | TBC1D3 | 37912693 | 2.6968  | 3.9229  | -0.8552 |
| CEU | TBC1D3 | 37917693 | 2.2292  | 4.2641  | -1.3209 |
| CEU | TBC1D3 | 37922693 | 1.7112  | 4.0935  | -1.6019 |
| CEU | TBC1D3 | 37927693 | 1.9487  | 5.458   | -1.8346 |
| CEU | TBC1D3 | 37932693 | 1.8707  | 5.6286  | -1.9115 |
| CEU | TBC1D3 | 37937693 | 2.3717  | 5.2874  | -1.5678 |
| CEU | TBC1D3 | 37942693 | 3.0427  | 7.6753  | -1.7806 |
| CEU | TBC1D3 | 37947693 | 1.7753  | 7.3342  | -2.2273 |
| CEU | TBC1D3 | 37952693 | 2.3838  | 6.9931  | -1.9286 |
| CEU | TBC1D3 | 37957693 | 3.1482  | 6.1402  | -1.408  |
| CEU | TBC1D3 | 37962693 | 3.006   | 5.7991  | -1.3834 |
| CEU | TBC1D3 | 37967693 | 2.5333  | 6.3108  | -1.7343 |
| CEU | TBC1D3 | 37972693 | 3.1377  | 6.4814  | -1.4987 |
| CEU | TBC1D3 | 37977693 | 3.2362  | 7.8459  | -1.7365 |
| CEU | TBC1D3 | 37982693 | 3.4892  | 8.8692  | -1.8104 |
| CEU | TBC1D3 | 37987693 | 3.1831  | 6.6519  | -1.5187 |
| CEU | TBC1D3 | 37992693 | 1.4449  | 4.6052  | -1.9188 |
| CEU | TBC1D3 | 37997693 | 1.5428  | 4.9463  | -1.941  |
| CEU | TBC1D3 | 38002693 | 5.4086  | 7.6753  | -0.8713 |
| CEU | TBC1D3 | 38007693 | 5.536   | 10.916  | -1.4921 |
| CEU | TBC1D3 | 38012693 | 2.0431  | 9.2104  | -2.329  |
| CEU | TBC1D3 | 38017693 | 2.9423  | 7.3342  | -1.7597 |
| CEU | TBC1D3 | 38022693 | 8.0033  | 8.187   | -0.0666 |
| CEU | TBC1D3 | 38027693 | 14.6741 | 11.4277 | 0.8625  |
| CEU | TBC1D3 | 38032693 | 12.5209 | 9.8926  | 0.7992  |
| CEU | TBC1D3 | 38037693 | 8.8912  | 7.3342  | 0.6238  |
| CEU | TBC1D3 | 38042693 | 8.1334  | 7.8459  | 0.1083  |
| CEU | TBC1D3 | 38047693 | 6.4855  | 6.3108  | 0.0802  |
| CEU | TBC1D3 | 38052693 | 6.9874  | 5.1169  | 1.0354  |

## 2\_TajimasD\_data

|     |        |          |         |         |         |
|-----|--------|----------|---------|---------|---------|
| CEU | TBC1D3 | 38057693 | 6.478   | 5.2874  | 0.6402  |
| CEU | TBC1D3 | 38062693 | 11.3144 | 8.6987  | 0.8961  |
| CEU | TBC1D3 | 38067693 | 16.8376 | 10.916  | 1.6424  |
| CEU | TBC1D3 | 38072693 | 15.0841 | 10.7454 | 1.2212  |
| CEU | TBC1D3 | 38077693 | 7.9678  | 8.0164  | -0.018  |
| CEU | TBC1D3 | 38082693 | 5.6386  | 5.458   | 0.0944  |
| CEU | TBC1D3 | 38087693 | 8.4752  | 6.8225  | 0.7072  |
| CEU | TBC1D3 | 38092693 | 10.6729 | 8.6987  | 0.6764  |
| CEU | TBC1D3 | 38097693 | 10.5737 | 8.3576  | 0.7878  |
| CEU | TBC1D3 | 38102693 | 8.9353  | 7.5047  | 0.5613  |
| CEU | TBC1D3 | 38107693 | 17.4317 | 11.0866 | 1.7344  |
| CEU | TBC1D3 | 38112693 | 25.6874 | 14.3272 | 2.4374  |
| CEU | TBC1D3 | 38117693 | 22.8713 | 14.1567 | 1.8911  |
| CEU | TBC1D3 | 38122693 | 17.4485 | 11.7688 | 1.4678  |
| CEU | TBC1D3 | 38127693 | 15.5043 | 9.8926  | 1.7063  |
| CEU | TBC1D3 | 38132693 | 12.3024 | 9.3809  | 0.9333  |
| CEU | TBC1D3 | 38137693 | 9.054   | 9.5515  | -0.1563 |
| CEU | TBC1D3 | 38142693 | 15.2979 | 11.2571 | 1.0888  |
| CEU | TBC1D3 | 38147693 | 20.7889 | 12.1099 | 2.1834  |
| CEU | TBC1D3 | 38152693 | 15.5337 | 10.4043 | 1.488   |
| CEU | TBC1D3 | 38157693 | 14.7508 | 9.5515  | 1.6334  |
| CEU | TBC1D3 | 38162693 | 21.2082 | 12.1099 | 2.2889  |
| CEU | TBC1D3 | 38167693 | 19.6852 | 12.7922 | 1.6466  |
| CEU | TBC1D3 | 38172693 | 14.3152 | 11.0866 | 0.8825  |
| CEU | TBC1D3 | 38177693 | 13.3556 | 9.5515  | 1.1951  |
| CEU | TBC1D3 | 38182693 | 11.6098 | 8.6987  | 0.9973  |
| CEU | TBC1D3 | 38187693 | 8.698   | 7.1636  | 0.6281  |
| CEU | TBC1D3 | 38192693 | 8.062   | 6.9931  | 0.4472  |
| CEU | TBC1D3 | 38197693 | 5.4807  | 6.4814  | -0.4485 |
| CEU | TBC1D3 | 38202693 | 4.2997  | 6.1402  | -0.8661 |
| CEU | TBC1D3 | 38207693 | 5.4682  | 7.3342  | -0.7476 |
| CEU | TBC1D3 | 38212693 | 10.8367 | 8.3576  | 0.8812  |
| CEU | TBC1D3 | 38217693 | 12.4207 | 7.6753  | 1.824   |
| CEU | TBC1D3 | 38222693 | 8.2645  | 6.1402  | 0.9996  |
| CEU | TBC1D3 | 38227693 | 5.1993  | 5.1169  | 0.0456  |
| CEU | TBC1D3 | 38232693 | 1.6992  | 3.5818  | -1.4189 |
| CEU | TBC1D3 | 38237693 | 1.7908  | 5.6286  | -1.9521 |
| CEU | TBC1D3 | 38242693 | 3.5894  | 7.6753  | -1.5705 |
| CEU | TBC1D3 | 38247693 | 5.5226  | 7.6753  | -0.8274 |
| CEU | TBC1D3 | 38252693 | 7.2639  | 7.1636  | 0.0411  |
| CEU | TBC1D3 | 38257693 | 6.0497  | 7.1636  | -0.456  |
| CEU | TBC1D3 | 38262693 | 3.1156  | 6.1402  | -1.4233 |
| CEU | TBC1D3 | 38267693 | 2.7753  | 4.7757  | -1.1765 |
| CEU | TBC1D3 | 38272693 | 2.9107  | 6.8225  | -1.6738 |
| CEU | TBC1D3 | 38277693 | 2.5114  | 8.187   | -2.0561 |
| CEU | TBC1D3 | 38282693 | 2.0849  | 6.3108  | -1.9402 |
| CEU | TBC1D3 | 38287693 | 1.8945  | 5.458   | -1.8629 |
| CEU | TBC1D3 | 38292693 | 1.2094  | 5.1169  | -2.1629 |
| CEU | TBC1D3 | 38297693 | 0.9986  | 4.6052  | -2.1897 |

## 2\_TajimasD\_data

|     |        |          |        |         |         |
|-----|--------|----------|--------|---------|---------|
| CEU | TBC1D3 | 38302693 | 1.4201 | 5.2874  | -2.0795 |
| CEU | TBC1D3 | 38307693 | 1.8536 | 7.3342  | -2.1959 |
| CEU | TBC1D3 | 38312693 | 2.5549 | 8.5281  | -2.0841 |
| CEU | TBC1D3 | 38317693 | 2.0056 | 5.7991  | -1.8789 |
| CEU | TBC1D3 | 38322693 | 1.3381 | 4.0935  | -1.8528 |
| CEU | TBC1D3 | 38327693 | 1.4302 | 5.458   | -2.1056 |
| CEU | TBC1D3 | 38332693 | 1.1018 | 6.3108  | -2.3916 |
| CEU | TBC1D3 | 38337693 | 1.2639 | 5.6286  | -2.2202 |
| CEU | TBC1D3 | 38342693 | 1.932  | 5.1169  | -1.7629 |
| CEU | TBC1D3 | 38347693 | 5.1301 | 6.4814  | -0.6057 |
| CEU | TBC1D3 | 38352693 | 7.0385 | 6.8225  | 0.0924  |
| CEU | TBC1D3 | 38357693 | 8.6353 | 8.3576  | 0.0987  |
| CEU | TBC1D3 | 38362693 | 8.2717 | 8.6987  | -0.1463 |
| CEU | TBC1D3 | 38367693 | 4.3764 | 7.5047  | -1.2274 |
| CEU | TBC1D3 | 38372693 | 4.1352 | 8.5281  | -1.5327 |
| CEU | TBC1D3 | 38377693 | 4.7316 | 9.3809  | -1.4853 |
| CEU | TBC1D3 | 38382693 | 4.5345 | 8.6987  | -1.4266 |
| CEU | TBC1D3 | 38387693 | 4.3913 | 7.3342  | -1.1791 |
| CEU | TBC1D3 | 38392693 | 3.8569 | 6.8225  | -1.269  |
| CEU | TBC1D3 | 38397693 | 2.9058 | 7.1636  | -1.7429 |
| CEU | TBC1D3 | 38402693 | 2.5129 | 7.3342  | -1.9317 |
| CEU | TBC1D3 | 38407693 | 3.2259 | 6.3108  | -1.4163 |
| CEU | TBC1D3 | 38412693 | 2.7702 | 6.8225  | -1.734  |
| CEU | TBC1D3 | 38417693 | 3.2132 | 7.1636  | -1.6171 |
| CEU | TBC1D3 | 38422693 | 4.61   | 7.5047  | -1.1357 |
| CEU | TBC1D3 | 38427693 | 4.2008 | 7.6753  | -1.3355 |
| CEU | TBC1D3 | 38432693 | 3.523  | 5.7991  | -1.1273 |
| CEU | TBC1D3 | 38437693 | 2.6412 | 4.2641  | -1.0535 |
| CEU | TBC1D3 | 38442693 | 1.9422 | 4.4346  | -1.5638 |
| CEU | TBC1D3 | 38447693 | 1.3968 | 4.7757  | -1.9873 |
| CEU | TBC1D3 | 38452693 | 1.1018 | 4.6052  | -2.1271 |
| CEU | TBC1D3 | 38457693 | 1.7223 | 5.458   | -1.9529 |
| CEU | TBC1D3 | 38462693 | 1.4628 | 4.6052  | -1.9079 |
| CEU | TBC1D3 | 38467693 | 1.9375 | 3.7524  | -1.3149 |
| CEU | TBC1D3 | 38472693 | 1.7363 | 3.9229  | -1.5251 |
| CEU | TBC1D3 | 38477693 | 1.3734 | 4.0935  | -1.8291 |
| CEU | TBC1D3 | 38482693 | 1.863  | 4.4346  | -1.6135 |
| CEU | TBC1D3 | 38487693 | 1.3416 | 4.2641  | -1.8971 |
| CEU | TBC1D3 | 38492693 | 2.0087 | 4.2641  | -1.4641 |
| CEU | TBC1D3 | 38497693 | 1.8992 | 3.9229  | -1.4115 |
| CEU | TBC1D3 | 38502693 | 1.7996 | 4.4346  | -1.6533 |
| CEU | TBC1D3 | 38507693 | 1.6199 | 4.6052  | -1.8125 |
| CEU | TBC1D3 | 38512693 | 0.6407 | 3.7524  | -2.2544 |
| CEU | TBC1D3 | 38517693 | 1.0583 | 4.9463  | -2.2173 |
| CEU | TBC1D3 | 38522693 | 2.0404 | 6.1402  | -1.9293 |
| CEU | TBC1D3 | 38527693 | 1.6968 | 5.9697  | -2.0622 |
| CEU | TBC1D3 | 38532693 | 3.987  | 11.0866 | -1.9407 |
| CEU | TBC1D3 | 38537693 | 4.894  | 12.6216 | -1.8696 |
| CEU | TBC1D3 | 38542693 | 2.9297 | 7.1636  | -1.7331 |

## 2\_TajimasD\_data

|     |        |          |        |         |         |
|-----|--------|----------|--------|---------|---------|
| CEU | TBC1D3 | 38547693 | 2.632  | 5.458   | -1.4774 |
| CEU | TBC1D3 | 38552693 | 2.7256 | 6.1402  | -1.6068 |
| CEU | TBC1D3 | 38557693 | 2.6209 | 5.6286  | -1.5299 |
| CEU | TBC1D3 | 38562693 | 1.5485 | 4.6052  | -1.8559 |
| CHB | TBC1D3 | 37562693 | 1.2644 | 3.0495  | -1.5352 |
| CHB | TBC1D3 | 37567693 | 3.9522 | 4.4048  | -0.2848 |
| CHB | TBC1D3 | 37572693 | 8.4923 | 8.8096  | -0.1071 |
| CHB | TBC1D3 | 37577693 | 7.1628 | 7.7931  | -0.2382 |
| CHB | TBC1D3 | 37582693 | 4.9376 | 6.4378  | -0.6745 |
| CHB | TBC1D3 | 37587693 | 4.7626 | 6.4378  | -0.7532 |
| CHB | TBC1D3 | 37592693 | 3.9478 | 6.2684  | -1.0688 |
| CHB | TBC1D3 | 37597693 | 4.5673 | 6.4378  | -0.841  |
| CHB | TBC1D3 | 37602693 | 6.3497 | 6.6072  | -0.1131 |
| CHB | TBC1D3 | 37607693 | 7.3415 | 7.7931  | -0.1707 |
| CHB | TBC1D3 | 37612693 | 7.2496 | 8.4708  | -0.4275 |
| CHB | TBC1D3 | 37617693 | 6.5578 | 7.6237  | -0.411  |
| CHB | TBC1D3 | 37622693 | 8.9431 | 9.1484  | -0.0669 |
| CHB | TBC1D3 | 37627693 | 7.7489 | 8.979   | -0.4081 |
| CHB | TBC1D3 | 37632693 | 4.9503 | 6.6072  | -0.7277 |
| CHB | TBC1D3 | 37637693 | 5.5376 | 6.2684  | -0.3366 |
| CHB | TBC1D3 | 37642693 | 5.2937 | 6.2684  | -0.4489 |
| CHB | TBC1D3 | 37647693 | 9.3539 | 9.3178  | 0.0116  |
| CHB | TBC1D3 | 37652693 | 8.8578 | 8.979   | -0.0402 |
| CHB | TBC1D3 | 37657693 | 3.6699 | 4.913   | -0.711  |
| CHB | TBC1D3 | 37662693 | 4.997  | 6.2684  | -0.5856 |
| CHB | TBC1D3 | 37667693 | 7.2699 | 7.6237  | -0.1364 |
| CHB | TBC1D3 | 37672693 | 7.2412 | 7.9625  | -0.2673 |
| CHB | TBC1D3 | 37677693 | 4.5589 | 8.1319  | -1.2987 |
| CHB | TBC1D3 | 37682693 | 3.782  | 6.946   | -1.3281 |
| CHB | TBC1D3 | 37687693 | 3.4807 | 5.4213  | -1.0176 |
| CHB | TBC1D3 | 37692693 | 3.3312 | 5.2519  | -1.0359 |
| CHB | TBC1D3 | 37697693 | 7.7995 | 7.7931  | 0.0024  |
| CHB | TBC1D3 | 37702693 | 8.2008 | 7.1154  | 0.4457  |
| CHB | TBC1D3 | 37707693 | 5.5509 | 5.9295  | -0.1833 |
| CHB | TBC1D3 | 37712693 | 5.7879 | 6.6072  | -0.3598 |
| CHB | TBC1D3 | 37717693 | 4.6314 | 6.2684  | -0.7539 |
| CHB | TBC1D3 | 37722693 | 3.4458 | 6.0989  | -1.2524 |
| CHB | TBC1D3 | 37727693 | 2.8445 | 7.1154  | -1.7539 |
| CHB | TBC1D3 | 37732693 | 2.9307 | 8.8096  | -1.9849 |
| CHB | TBC1D3 | 37737693 | 7.1262 | 10.5037 | -0.9683 |
| CHB | TBC1D3 | 37742693 | 8.2098 | 9.6567  | -0.4487 |
| CHB | TBC1D3 | 37747693 | 4.3722 | 7.9625  | -1.3305 |
| CHB | TBC1D3 | 37752693 | 1.4761 | 6.0989  | -2.1822 |
| CHB | TBC1D3 | 37757693 | 0.9619 | 4.066   | -2.0932 |
| CHB | TBC1D3 | 37762693 | 1.5814 | 3.5577  | -1.4936 |
| CHB | TBC1D3 | 37767693 | 3.2993 | 6.6072  | -1.4529 |
| CHB | TBC1D3 | 37772693 | 3.4894 | 8.1319  | -1.6874 |
| CHB | TBC1D3 | 37777693 | 3.3179 | 7.4543  | -1.6282 |
| CHB | TBC1D3 | 37782693 | 4.2465 | 7.7931  | -1.3404 |

## 2\_TajimasD\_data

|     |        |          |         |         |         |
|-----|--------|----------|---------|---------|---------|
| CHB | TBC1D3 | 37787693 | 5.0133  | 7.9625  | -1.0929 |
| CHB | TBC1D3 | 37792693 | 4.3895  | 7.7931  | -1.2864 |
| CHB | TBC1D3 | 37797693 | 1.8254  | 6.6072  | -2.1002 |
| CHB | TBC1D3 | 37802693 | 1.0426  | 6.6072  | -2.444  |
| CHB | TBC1D3 | 37807693 | 1.8245  | 6.7766  | -2.1258 |
| CHB | TBC1D3 | 37812693 | 4.2071  | 6.946   | -1.1497 |
| CHB | TBC1D3 | 37817693 | 4.167   | 7.1154  | -1.2108 |
| CHB | TBC1D3 | 37822693 | 3.2846  | 8.1319  | -1.7619 |
| CHB | TBC1D3 | 37827693 | 11.8905 | 10.8426 | 0.2916  |
| CHB | TBC1D3 | 37832693 | 20.4706 | 11.1814 | 2.5117  |
| CHB | TBC1D3 | 37837693 | 13.6014 | 8.979   | 1.5334  |
| CHB | TBC1D3 | 37842693 | 5.6461  | 6.6072  | -0.4221 |
| CHB | TBC1D3 | 37847693 | 5.4061  | 5.5907  | -0.0942 |
| CHB | TBC1D3 | 37852693 | 5.3312  | 6.6072  | -0.5604 |
| CHB | TBC1D3 | 37857693 | 3.8833  | 6.2684  | -1.0985 |
| CHB | TBC1D3 | 37862693 | 2.0139  | 5.2519  | -1.7464 |
| CHB | TBC1D3 | 37867693 | 2.3436  | 5.7601  | -1.6974 |
| CHB | TBC1D3 | 37872693 | 3.4999  | 6.4378  | -1.321  |
| CHB | TBC1D3 | 37877693 | 3.8389  | 6.4378  | -1.1686 |
| CHB | TBC1D3 | 37882693 | 3.087   | 5.9295  | -1.3761 |
| CHB | TBC1D3 | 37887693 | 1.6623  | 4.4048  | -1.7257 |
| CHB | TBC1D3 | 37892693 | 1.5863  | 5.0825  | -1.941  |
| CHB | TBC1D3 | 37897693 | 1.4275  | 7.4543  | -2.3723 |
| CHB | TBC1D3 | 37902693 | 3.0056  | 9.9955  | -2.0989 |
| CHB | TBC1D3 | 37907693 | 4.3988  | 9.8261  | -1.6559 |
| CHB | TBC1D3 | 37912693 | 2.4995  | 5.9295  | -1.6605 |
| CHB | TBC1D3 | 37917693 | 1.8597  | 4.7436  | -1.7011 |
| CHB | TBC1D3 | 37922693 | 1.5014  | 4.7436  | -1.9125 |
| CHB | TBC1D3 | 37927693 | 1.6642  | 5.4213  | -1.9701 |
| CHB | TBC1D3 | 37932693 | 1.5791  | 5.4213  | -2.0147 |
| CHB | TBC1D3 | 37937693 | 2.6255  | 5.9295  | -1.5995 |
| CHB | TBC1D3 | 37942693 | 2.9061  | 8.8096  | -1.9932 |
| CHB | TBC1D3 | 37947693 | 0.9621  | 8.4708  | -2.6286 |
| CHB | TBC1D3 | 37952693 | 1.2334  | 8.6402  | -2.546  |
| CHB | TBC1D3 | 37957693 | 2.2791  | 8.1319  | -2.1273 |
| CHB | TBC1D3 | 37962693 | 2.732   | 7.7931  | -1.9128 |
| CHB | TBC1D3 | 37967693 | 2.1283  | 7.9625  | -2.162  |
| CHB | TBC1D3 | 37972693 | 2.6002  | 6.4378  | -1.7255 |
| CHB | TBC1D3 | 37977693 | 2.5338  | 8.4708  | -2.0784 |
| CHB | TBC1D3 | 37982693 | 2.4011  | 10.3343 | -2.3092 |
| CHB | TBC1D3 | 37987693 | 2.4165  | 8.979   | -2.177  |
| CHB | TBC1D3 | 37992693 | 1.2163  | 7.1154  | -2.4226 |
| CHB | TBC1D3 | 37997693 | 1.2326  | 5.7601  | -2.2494 |
| CHB | TBC1D3 | 38002693 | 4.4384  | 8.4708  | -1.4116 |
| CHB | TBC1D3 | 38007693 | 4.4795  | 12.0285 | -1.9057 |
| CHB | TBC1D3 | 38012693 | 1.5414  | 9.9955  | -2.5386 |
| CHB | TBC1D3 | 38017693 | 2.4843  | 8.6402  | -2.116  |
| CHB | TBC1D3 | 38022693 | 7.5142  | 9.3178  | -0.5781 |
| CHB | TBC1D3 | 38027693 | 13.557  | 9.8261  | 1.1383  |



## 2\_TajimasD\_data

|     |        |          |         |         |         |
|-----|--------|----------|---------|---------|---------|
| CHB | TBC1D3 | 38032693 | 11.3554 | 8.1319  | 1.1717  |
| CHB | TBC1D3 | 38037693 | 7.8188  | 5.9295  | 0.9146  |
| CHB | TBC1D3 | 38042693 | 7.0027  | 6.0989  | 0.4266  |
| CHB | TBC1D3 | 38047693 | 5.6769  | 5.9295  | -0.1223 |
| CHB | TBC1D3 | 38052693 | 6.1902  | 6.2684  | -0.036  |
| CHB | TBC1D3 | 38057693 | 5.759   | 6.2684  | -0.2346 |
| CHB | TBC1D3 | 38062693 | 10.2633 | 7.9625  | 0.8526  |
| CHB | TBC1D3 | 38067693 | 15.8488 | 11.3508 | 1.1992  |
| CHB | TBC1D3 | 38072693 | 14.4279 | 11.1814 | 0.8778  |
| CHB | TBC1D3 | 38077693 | 7.3767  | 7.1154  | 0.1073  |
| CHB | TBC1D3 | 38082693 | 5.2899  | 6.6072  | -0.5786 |
| CHB | TBC1D3 | 38087693 | 8.3118  | 9.3178  | -0.3225 |
| CHB | TBC1D3 | 38092693 | 10.3276 | 10.8426 | -0.1433 |
| CHB | TBC1D3 | 38097693 | 10.0969 | 9.3178  | 0.2497  |
| CHB | TBC1D3 | 38102693 | 9.0154  | 7.4543  | 0.6145  |
| CHB | TBC1D3 | 38107693 | 18.5627 | 10.5037 | 2.3105  |
| CHB | TBC1D3 | 38112693 | 26.9151 | 14.5697 | 2.5993  |
| CHB | TBC1D3 | 38117693 | 22.1582 | 15.0779 | 1.4429  |
| CHB | TBC1D3 | 38122693 | 15.6756 | 12.5367 | 0.7621  |
| CHB | TBC1D3 | 38127693 | 14.4089 | 10.6731 | 1.0551  |
| CHB | TBC1D3 | 38132693 | 11.8319 | 8.8096  | 1.0204  |
| CHB | TBC1D3 | 38137693 | 8.8169  | 8.8096  | 0.0025  |
| CHB | TBC1D3 | 38142693 | 14.0796 | 11.5202 | 0.6729  |
| CHB | TBC1D3 | 38147693 | 19.3476 | 12.3673 | 1.7166  |
| CHB | TBC1D3 | 38152693 | 14.1275 | 10.3343 | 1.1041  |
| CHB | TBC1D3 | 38157693 | 13.2006 | 10.1649 | 0.8974  |
| CHB | TBC1D3 | 38162693 | 19.3785 | 12.7061 | 1.5995  |
| CHB | TBC1D3 | 38167693 | 18.585  | 14.7391 | 0.8009  |
| CHB | TBC1D3 | 38172693 | 14.5467 | 12.3673 | 0.536   |
| CHB | TBC1D3 | 38177693 | 12.8671 | 8.3013  | 1.6284  |
| CHB | TBC1D3 | 38182693 | 10.9271 | 7.2848  | 1.4641  |
| CHB | TBC1D3 | 38187693 | 8.4731  | 6.6072  | 0.8195  |
| CHB | TBC1D3 | 38192693 | 7.5424  | 8.1319  | -0.2143 |
| CHB | TBC1D3 | 38197693 | 5.0002  | 9.6567  | -1.4439 |
| CHB | TBC1D3 | 38202693 | 4.7649  | 8.6402  | -1.3321 |
| CHB | TBC1D3 | 38207693 | 5.4458  | 7.1154  | -0.6857 |
| CHB | TBC1D3 | 38212693 | 9.6478  | 6.946   | 1.1341  |
| CHB | TBC1D3 | 38217693 | 11.7112 | 6.0989  | 2.6493  |
| CHB | TBC1D3 | 38222693 | 8.5549  | 6.6072  | 0.8555  |
| CHB | TBC1D3 | 38227693 | 5.8921  | 6.6072  | -0.3141 |
| CHB | TBC1D3 | 38232693 | 1.8389  | 4.066   | -1.5018 |
| CHB | TBC1D3 | 38237693 | 1.2239  | 5.4213  | -2.201  |
| CHB | TBC1D3 | 38242693 | 3.5193  | 8.1319  | -1.6766 |
| CHB | TBC1D3 | 38247693 | 5.4626  | 7.6237  | -0.8334 |
| CHB | TBC1D3 | 38252693 | 8.0973  | 5.7601  | 1.1612  |
| CHB | TBC1D3 | 38257693 | 6.6115  | 6.2684  | 0.158   |
| CHB | TBC1D3 | 38262693 | 2.4634  | 6.2684  | -1.7524 |
| CHB | TBC1D3 | 38267693 | 2.7323  | 5.4213  | -1.41   |
| CHB | TBC1D3 | 38272693 | 3.0603  | 7.4543  | -1.7296 |

## 2\_TajimasD\_data

|     |        |          |        |        |         |
|-----|--------|----------|--------|--------|---------|
| CHB | TBC1D3 | 38277693 | 2.0242 | 7.4543 | -2.1374 |
| CHB | TBC1D3 | 38282693 | 1.7668 | 5.9295 | -2.0152 |
| CHB | TBC1D3 | 38287693 | 1.9002 | 5.5907 | -1.883  |
| CHB | TBC1D3 | 38292693 | 0.8616 | 4.7436 | -2.2899 |
| CHB | TBC1D3 | 38297693 | 0.5262 | 4.066  | -2.387  |
| CHB | TBC1D3 | 38302693 | 0.767  | 3.2189 | -2.0158 |
| CHB | TBC1D3 | 38307693 | 1.1898 | 4.913  | -2.1297 |
| CHB | TBC1D3 | 38312693 | 1.4043 | 6.2684 | -2.2402 |
| CHB | TBC1D3 | 38317693 | 1.1946 | 5.7601 | -2.2682 |
| CHB | TBC1D3 | 38322693 | 0.9705 | 4.913  | -2.2551 |
| CHB | TBC1D3 | 38327693 | 0.8422 | 5.7601 | -2.4433 |
| CHB | TBC1D3 | 38332693 | 0.696  | 5.7601 | -2.516  |
| CHB | TBC1D3 | 38337693 | 0.8646 | 4.5742 | -2.2589 |
| CHB | TBC1D3 | 38342693 | 1.6381 | 6.2684 | -2.1325 |
| CHB | TBC1D3 | 38347693 | 4.1045 | 7.4543 | -1.3186 |
| CHB | TBC1D3 | 38352693 | 5.6236 | 7.1154 | -0.6126 |
| CHB | TBC1D3 | 38357693 | 8.3111 | 7.4543 | 0.3373  |
| CHB | TBC1D3 | 38362693 | 8.5627 | 6.7766 | 0.7667  |
| CHB | TBC1D3 | 38367693 | 5.4708 | 6.0989 | -0.2965 |
| CHB | TBC1D3 | 38372693 | 5.8614 | 6.6072 | -0.3276 |
| CHB | TBC1D3 | 38377693 | 7.0497 | 7.6237 | -0.2213 |
| CHB | TBC1D3 | 38382693 | 7.3244 | 6.946  | 0.1588  |
| CHB | TBC1D3 | 38387693 | 6.985  | 6.6072 | 0.1659  |
| CHB | TBC1D3 | 38392693 | 5.4622 | 7.6237 | -0.8335 |
| CHB | TBC1D3 | 38397693 | 3.3326 | 5.4213 | -1.0953 |
| CHB | TBC1D3 | 38402693 | 3.5957 | 5.0825 | -0.8254 |
| CHB | TBC1D3 | 38407693 | 4.6219 | 6.7766 | -0.9249 |
| CHB | TBC1D3 | 38412693 | 3.246  | 5.9295 | -1.2991 |
| CHB | TBC1D3 | 38417693 | 4.4877 | 6.2684 | -0.8201 |
| CHB | TBC1D3 | 38422693 | 7.5561 | 6.7766 | 0.3346  |
| CHB | TBC1D3 | 38427693 | 6.8544 | 5.4213 | 0.7515  |
| CHB | TBC1D3 | 38432693 | 4.412  | 5.2519 | -0.453  |
| CHB | TBC1D3 | 38437693 | 3.1873 | 4.7436 | -0.918  |
| CHB | TBC1D3 | 38442693 | 2.7976 | 3.8965 | -0.7686 |
| CHB | TBC1D3 | 38447693 | 1.6705 | 2.8801 | -1.0906 |
| CHB | TBC1D3 | 38452693 | 1.4377 | 2.033  | -0.7099 |
| CHB | TBC1D3 | 38457693 | 2.9874 | 4.2354 | -0.8125 |
| CHB | TBC1D3 | 38462693 | 2.3834 | 5.4213 | -1.593  |
| CHB | TBC1D3 | 38467693 | 1.6663 | 4.066  | -1.6182 |
| CHB | TBC1D3 | 38472693 | 1.9718 | 4.4048 | -1.531  |
| CHB | TBC1D3 | 38477693 | 2.1788 | 4.7436 | -1.5129 |
| CHB | TBC1D3 | 38482693 | 2.7927 | 5.0825 | -1.2713 |
| CHB | TBC1D3 | 38487693 | 1.7672 | 4.2354 | -1.6068 |
| CHB | TBC1D3 | 38492693 | 2.423  | 3.7271 | -0.9474 |
| CHB | TBC1D3 | 38497693 | 3.0824 | 4.2354 | -0.7506 |
| CHB | TBC1D3 | 38502693 | 1.9256 | 4.5742 | -1.6128 |
| CHB | TBC1D3 | 38507693 | 1.051  | 6.2684 | -2.4029 |
| CHB | TBC1D3 | 38512693 | 0.4927 | 5.5907 | -2.6011 |
| CHB | TBC1D3 | 38517693 | 0.9277 | 4.4048 | -2.188  |

## 2\_TajimasD\_data

|     |        |          |         |         |         |
|-----|--------|----------|---------|---------|---------|
| CHB | TBC1D3 | 38522693 | 1.4253  | 4.2354  | -1.8294 |
| CHB | TBC1D3 | 38527693 | 0.9756  | 3.0495  | -1.7836 |
| CHB | TBC1D3 | 38532693 | 2.9562  | 6.2684  | -1.5255 |
| CHB | TBC1D3 | 38537693 | 3.8667  | 7.4543  | -1.4122 |
| CHB | TBC1D3 | 38542693 | 2.1445  | 4.4048  | -1.4223 |
| CHB | TBC1D3 | 38547693 | 1.8363  | 2.5412  | -0.7039 |
| CHB | TBC1D3 | 38552693 | 2.3331  | 2.8801  | -0.4932 |
| CHB | TBC1D3 | 38557693 | 2.2117  | 3.2189  | -0.8281 |
| CHB | TBC1D3 | 38562693 | 1.2795  | 2.2024  | -1.0334 |
| YRI | TBC1D3 | 37562693 | 2.6339  | 6.5544  | -1.7285 |
| YRI | TBC1D3 | 37567693 | 6.4024  | 9.0754  | -0.875  |
| YRI | TBC1D3 | 37572693 | 12.4939 | 12.9408 | -0.1049 |
| YRI | TBC1D3 | 37577693 | 11.3349 | 11.7644 | -0.1103 |
| YRI | TBC1D3 | 37582693 | 9.0696  | 11.0921 | -0.5491 |
| YRI | TBC1D3 | 37587693 | 8.2458  | 10.0837 | -0.5455 |
| YRI | TBC1D3 | 37592693 | 6.5839  | 11.5963 | -1.3053 |
| YRI | TBC1D3 | 37597693 | 6.8115  | 12.1005 | -1.3232 |
| YRI | TBC1D3 | 37602693 | 10.3789 | 11.5963 | -0.317  |
| YRI | TBC1D3 | 37607693 | 11.689  | 11.0921 | 0.1621  |
| YRI | TBC1D3 | 37612693 | 10.7584 | 10.924  | -0.0456 |
| YRI | TBC1D3 | 37617693 | 9.754   | 9.5795  | 0.0543  |
| YRI | TBC1D3 | 37622693 | 12.8633 | 10.5879 | 0.6453  |
| YRI | TBC1D3 | 37627693 | 11.7018 | 12.4366 | -0.1791 |
| YRI | TBC1D3 | 37632693 | 7.689   | 12.2685 | -1.1309 |
| YRI | TBC1D3 | 37637693 | 9.8387  | 13.7811 | -0.8722 |
| YRI | TBC1D3 | 37642693 | 10.0074 | 13.9492 | -0.8621 |
| YRI | TBC1D3 | 37647693 | 11.9656 | 14.6214 | -0.5554 |
| YRI | TBC1D3 | 37652693 | 10.1942 | 13.2769 | -0.7065 |
| YRI | TBC1D3 | 37657693 | 5.3244  | 9.5795  | -1.3247 |
| YRI | TBC1D3 | 37662693 | 7.2706  | 9.4115  | -0.6776 |
| YRI | TBC1D3 | 37667693 | 9.9566  | 11.5963 | -0.427  |
| YRI | TBC1D3 | 37672693 | 10.9931 | 13.613  | -0.5864 |
| YRI | TBC1D3 | 37677693 | 9.4409  | 12.2685 | -0.6983 |
| YRI | TBC1D3 | 37682693 | 7.6765  | 8.9073  | -0.4099 |
| YRI | TBC1D3 | 37687693 | 5.5396  | 7.3947  | -0.733  |
| YRI | TBC1D3 | 37692693 | 6.4191  | 7.5628  | -0.4428 |
| YRI | TBC1D3 | 37697693 | 10.7923 | 9.9157  | 0.2643  |
| YRI | TBC1D3 | 37702693 | 9.7119  | 9.4115  | 0.0951  |
| YRI | TBC1D3 | 37707693 | 7.1968  | 8.235   | -0.3717 |
| YRI | TBC1D3 | 37712693 | 8.2282  | 10.0837 | -0.5507 |
| YRI | TBC1D3 | 37717693 | 7.4086  | 10.2518 | -0.831  |
| YRI | TBC1D3 | 37722693 | 6.685   | 8.5712  | -0.6509 |
| YRI | TBC1D3 | 37727693 | 6.7787  | 8.235   | -0.5214 |
| YRI | TBC1D3 | 37732693 | 6.0478  | 9.5795  | -1.0995 |
| YRI | TBC1D3 | 37737693 | 10.4794 | 12.9408 | -0.578  |
| YRI | TBC1D3 | 37742693 | 12.5442 | 13.2769 | -0.1679 |
| YRI | TBC1D3 | 37747693 | 11.904  | 11.2602 | 0.1723  |
| YRI | TBC1D3 | 37752693 | 8.2875  | 10.5879 | -0.6524 |
| YRI | TBC1D3 | 37757693 | 4.4307  | 10.0837 | -1.6779 |

## 2\_TajimasD\_data

|     |        |          |         |         |         |
|-----|--------|----------|---------|---------|---------|
| YRI | TBC1D3 | 37762693 | 5.0152  | 9.5795  | -1.421  |
| YRI | TBC1D3 | 37767693 | 7.747   | 10.5879 | -0.8057 |
| YRI | TBC1D3 | 37772693 | 8.6081  | 10.924  | -0.6378 |
| YRI | TBC1D3 | 37777693 | 8.3114  | 10.924  | -0.7196 |
| YRI | TBC1D3 | 37782693 | 9.1004  | 11.4282 | -0.6145 |
| YRI | TBC1D3 | 37787693 | 8.2104  | 11.5963 | -0.8817 |
| YRI | TBC1D3 | 37792693 | 7.9377  | 10.756  | -0.7876 |
| YRI | TBC1D3 | 37797693 | 6.7589  | 9.0754  | -0.7583 |
| YRI | TBC1D3 | 37802693 | 5.7377  | 9.5795  | -1.1961 |
| YRI | TBC1D3 | 37807693 | 6.5161  | 11.0921 | -1.2424 |
| YRI | TBC1D3 | 37812693 | 7.1375  | 12.9408 | -1.3627 |
| YRI | TBC1D3 | 37817693 | 6.9701  | 14.7895 | -1.6176 |
| YRI | TBC1D3 | 37822693 | 6.7523  | 13.613  | -1.5356 |
| YRI | TBC1D3 | 37827693 | 12.0763 | 12.4366 | -0.0878 |
| YRI | TBC1D3 | 37832693 | 18.2464 | 12.9408 | 1.2458  |
| YRI | TBC1D3 | 37837693 | 12.4191 | 9.7476  | 0.8184  |
| YRI | TBC1D3 | 37842693 | 6.3191  | 8.7392  | -0.8203 |
| YRI | TBC1D3 | 37847693 | 7.025   | 10.0837 | -0.9079 |
| YRI | TBC1D3 | 37852693 | 7.116   | 9.2434  | -0.6847 |
| YRI | TBC1D3 | 37857693 | 6.3656  | 8.4031  | -0.7161 |
| YRI | TBC1D3 | 37862693 | 5.0607  | 7.3947  | -0.9223 |
| YRI | TBC1D3 | 37867693 | 4.4935  | 7.5628  | -1.1882 |
| YRI | TBC1D3 | 37872693 | 5.0923  | 8.9073  | -1.2706 |
| YRI | TBC1D3 | 37877693 | 5.1093  | 9.5795  | -1.3917 |
| YRI | TBC1D3 | 37882693 | 4.4308  | 10.2518 | -1.7013 |
| YRI | TBC1D3 | 37887693 | 3.4159  | 8.9073  | -1.829  |
| YRI | TBC1D3 | 37892693 | 4.5259  | 8.067   | -1.2922 |
| YRI | TBC1D3 | 37897693 | 5.5995  | 10.924  | -1.4665 |
| YRI | TBC1D3 | 37902693 | 9.6733  | 14.1172 | -0.9609 |
| YRI | TBC1D3 | 37907693 | 11.9521 | 13.9492 | -0.4368 |
| YRI | TBC1D3 | 37912693 | 6.8474  | 10.2518 | -0.995  |
| YRI | TBC1D3 | 37917693 | 5.6436  | 10.0837 | -1.3179 |
| YRI | TBC1D3 | 37922693 | 6.6845  | 10.924  | -1.1676 |
| YRI | TBC1D3 | 37927693 | 7.9155  | 10.756  | -0.7938 |
| YRI | TBC1D3 | 37932693 | 7.0103  | 9.5795  | -0.7999 |
| YRI | TBC1D3 | 37937693 | 6.955   | 8.9073  | -0.6502 |
| YRI | TBC1D3 | 37942693 | 9.3869  | 9.7476  | -0.1105 |
| YRI | TBC1D3 | 37947693 | 7.9046  | 9.4115  | -0.4769 |
| YRI | TBC1D3 | 37952693 | 9.2831  | 12.1005 | -0.7049 |
| YRI | TBC1D3 | 37957693 | 9.9484  | 12.7727 | -0.6714 |
| YRI | TBC1D3 | 37962693 | 8.4836  | 11.5963 | -0.8106 |
| YRI | TBC1D3 | 37967693 | 7.8091  | 9.9157  | -0.6351 |
| YRI | TBC1D3 | 37972693 | 7.7026  | 9.5795  | -0.5843 |
| YRI | TBC1D3 | 37977693 | 8.7071  | 11.5963 | -0.7524 |
| YRI | TBC1D3 | 37982693 | 9.7651  | 12.4366 | -0.6513 |
| YRI | TBC1D3 | 37987693 | 8.7261  | 12.1005 | -0.8442 |
| YRI | TBC1D3 | 37992693 | 6.7942  | 10.5879 | -1.0759 |
| YRI | TBC1D3 | 37997693 | 7.5212  | 9.2434  | -0.5543 |
| YRI | TBC1D3 | 38002693 | 12.3699 | 12.9408 | -0.1341 |

## 2\_TajimasD\_data

|     |        |          |         |         |         |
|-----|--------|----------|---------|---------|---------|
| YRI | TBC1D3 | 38007693 | 15.7002 | 16.9743 | -0.2311 |
| YRI | TBC1D3 | 38012693 | 12.6918 | 15.1256 | -0.4928 |
| YRI | TBC1D3 | 38017693 | 9.8517  | 10.924  | -0.2953 |
| YRI | TBC1D3 | 38022693 | 10.4293 | 10.756  | -0.0913 |
| YRI | TBC1D3 | 38027693 | 13.3435 | 13.7811 | -0.0968 |
| YRI | TBC1D3 | 38032693 | 11.196  | 11.9324 | -0.1867 |
| YRI | TBC1D3 | 38037693 | 8.5032  | 9.4115  | -0.2875 |
| YRI | TBC1D3 | 38042693 | 8.3858  | 9.0754  | -0.2257 |
| YRI | TBC1D3 | 38047693 | 7.9569  | 8.4031  | -0.1568 |
| YRI | TBC1D3 | 38052693 | 8.6122  | 9.7476  | -0.3478 |
| YRI | TBC1D3 | 38057693 | 6.9775  | 10.924  | -1.0869 |
| YRI | TBC1D3 | 38062693 | 8.8009  | 12.4366 | -0.8864 |
| YRI | TBC1D3 | 38067693 | 12.856  | 16.302  | -0.6496 |
| YRI | TBC1D3 | 38072693 | 13.8566 | 16.9743 | -0.5655 |
| YRI | TBC1D3 | 38077693 | 9.9688  | 14.2853 | -0.9229 |
| YRI | TBC1D3 | 38082693 | 7.7709  | 11.9324 | -1.0549 |
| YRI | TBC1D3 | 38087693 | 10.3056 | 12.1005 | -0.449  |
| YRI | TBC1D3 | 38092693 | 12.5861 | 14.1172 | -0.3311 |
| YRI | TBC1D3 | 38097693 | 11.5584 | 15.6298 | -0.799  |
| YRI | TBC1D3 | 38102693 | 10.3724 | 16.134  | -1.097  |
| YRI | TBC1D3 | 38107693 | 17.1526 | 17.3104 | -0.0281 |
| YRI | TBC1D3 | 38112693 | 25.4813 | 18.4868 | 1.1689  |
| YRI | TBC1D3 | 38117693 | 24.5586 | 17.6465 | 1.2079  |
| YRI | TBC1D3 | 38122693 | 19.6678 | 16.302  | 0.6345  |
| YRI | TBC1D3 | 38127693 | 18.4028 | 17.1423 | 0.2265  |
| YRI | TBC1D3 | 38132693 | 14.5787 | 15.9659 | -0.2668 |
| YRI | TBC1D3 | 38137693 | 10.9308 | 14.4534 | -0.7448 |
| YRI | TBC1D3 | 38142693 | 17.3853 | 16.9743 | 0.0745  |
| YRI | TBC1D3 | 38147693 | 20.4834 | 16.302  | 0.7883  |
| YRI | TBC1D3 | 38152693 | 15.2245 | 13.613  | 0.3607  |
| YRI | TBC1D3 | 38157693 | 15.9244 | 15.9659 | -0.008  |
| YRI | TBC1D3 | 38162693 | 21.3877 | 19.9994 | 0.2151  |
| YRI | TBC1D3 | 38167693 | 20.6996 | 22.3523 | -0.23   |
| YRI | TBC1D3 | 38172693 | 14.6566 | 20.3355 | -0.8658 |
| YRI | TBC1D3 | 38177693 | 12.3826 | 16.6382 | -0.7868 |
| YRI | TBC1D3 | 38182693 | 10.2935 | 15.9659 | -1.0909 |
| YRI | TBC1D3 | 38187693 | 8.2003  | 13.2769 | -1.1635 |
| YRI | TBC1D3 | 38192693 | 9.9711  | 14.1172 | -0.8965 |
| YRI | TBC1D3 | 38197693 | 12.8242 | 15.7978 | -0.5777 |
| YRI | TBC1D3 | 38202693 | 11.5899 | 14.6214 | -0.634  |
| YRI | TBC1D3 | 38207693 | 8.7598  | 12.7727 | -0.954  |
| YRI | TBC1D3 | 38212693 | 11.8859 | 12.9408 | -0.2477 |
| YRI | TBC1D3 | 38217693 | 12.7774 | 12.7727 | 0.0011  |
| YRI | TBC1D3 | 38222693 | 12.4466 | 12.9408 | -0.116  |
| YRI | TBC1D3 | 38227693 | 9.892   | 14.6214 | -0.9891 |
| YRI | TBC1D3 | 38232693 | 5.2625  | 12.1005 | -1.7107 |
| YRI | TBC1D3 | 38237693 | 4.7921  | 10.5879 | -1.6437 |
| YRI | TBC1D3 | 38242693 | 6.9056  | 10.5879 | -1.0443 |
| YRI | TBC1D3 | 38247693 | 6.9537  | 9.7476  | -0.8559 |

## 2\_TajimasD\_data

|     |        |          |         |         |         |
|-----|--------|----------|---------|---------|---------|
| YRI | TBC1D3 | 38252693 | 7.49    | 8.5712  | -0.3731 |
| YRI | TBC1D3 | 38257693 | 9.3473  | 10.0837 | -0.2186 |
| YRI | TBC1D3 | 38262693 | 6.5577  | 11.2602 | -1.2589 |
| YRI | TBC1D3 | 38267693 | 4.6244  | 8.5712  | -1.3621 |
| YRI | TBC1D3 | 38272693 | 6.0276  | 9.7476  | -1.1396 |
| YRI | TBC1D3 | 38277693 | 7.6404  | 12.2685 | -1.1429 |
| YRI | TBC1D3 | 38282693 | 6.0757  | 9.4115  | -1.0558 |
| YRI | TBC1D3 | 38287693 | 5.3582  | 8.4031  | -1.0702 |
| YRI | TBC1D3 | 38292693 | 5.5852  | 10.2518 | -1.3639 |
| YRI | TBC1D3 | 38297693 | 5.5772  | 11.2602 | -1.5213 |
| YRI | TBC1D3 | 38302693 | 6.0438  | 12.1005 | -1.5153 |
| YRI | TBC1D3 | 38307693 | 6.0119  | 12.2685 | -1.5451 |
| YRI | TBC1D3 | 38312693 | 6.4525  | 13.1089 | -1.5441 |
| YRI | TBC1D3 | 38317693 | 6.2963  | 11.7644 | -1.4048 |
| YRI | TBC1D3 | 38322693 | 4.9841  | 8.235   | -1.164  |
| YRI | TBC1D3 | 38327693 | 6.0584  | 9.9157  | -1.163  |
| YRI | TBC1D3 | 38332693 | 6.288   | 11.5963 | -1.3823 |
| YRI | TBC1D3 | 38337693 | 6.5594  | 11.2602 | -1.2584 |
| YRI | TBC1D3 | 38342693 | 6.9626  | 10.5879 | -1.0281 |
| YRI | TBC1D3 | 38347693 | 8.1467  | 10.2518 | -0.6153 |
| YRI | TBC1D3 | 38352693 | 9.5783  | 10.5879 | -0.2863 |
| YRI | TBC1D3 | 38357693 | 11.5967 | 12.4366 | -0.2048 |
| YRI | TBC1D3 | 38362693 | 11.1125 | 11.9324 | -0.2078 |
| YRI | TBC1D3 | 38367693 | 6.3917  | 9.9157  | -1.0625 |
| YRI | TBC1D3 | 38372693 | 5.6546  | 10.924  | -1.4513 |
| YRI | TBC1D3 | 38377693 | 7.3398  | 11.7644 | -1.1367 |
| YRI | TBC1D3 | 38382693 | 6.8909  | 11.9324 | -1.278  |
| YRI | TBC1D3 | 38387693 | 6.1724  | 11.0921 | -1.3357 |
| YRI | TBC1D3 | 38392693 | 5.2408  | 9.7476  | -1.3806 |
| YRI | TBC1D3 | 38397693 | 3.4868  | 8.9073  | -1.8053 |
| YRI | TBC1D3 | 38402693 | 5.1084  | 11.4282 | -1.6684 |
| YRI | TBC1D3 | 38407693 | 5.4868  | 10.756  | -1.4725 |
| YRI | TBC1D3 | 38412693 | 3.2387  | 6.7225  | -1.5012 |
| YRI | TBC1D3 | 38417693 | 4.1121  | 8.5712  | -1.5388 |
| YRI | TBC1D3 | 38422693 | 6.1113  | 10.0837 | -1.1791 |
| YRI | TBC1D3 | 38427693 | 5.7233  | 8.4031  | -0.9418 |
| YRI | TBC1D3 | 38432693 | 4.9026  | 8.4031  | -1.2303 |
| YRI | TBC1D3 | 38437693 | 4.3941  | 8.235   | -1.3753 |
| YRI | TBC1D3 | 38442693 | 4.1074  | 7.2267  | -1.2587 |
| YRI | TBC1D3 | 38447693 | 3.1767  | 6.5544  | -1.4892 |
| YRI | TBC1D3 | 38452693 | 3.0321  | 6.7225  | -1.5902 |
| YRI | TBC1D3 | 38457693 | 4.9717  | 8.235   | -1.1684 |
| YRI | TBC1D3 | 38462693 | 4.1005  | 7.8989  | -1.4131 |
| YRI | TBC1D3 | 38467693 | 4.6036  | 7.0586  | -1.0121 |
| YRI | TBC1D3 | 38472693 | 4.284   | 7.2267  | -1.1874 |
| YRI | TBC1D3 | 38477693 | 2.4377  | 7.2267  | -1.9325 |
| YRI | TBC1D3 | 38482693 | 3.3446  | 7.2267  | -1.5665 |
| YRI | TBC1D3 | 38487693 | 2.7156  | 6.8906  | -1.7592 |
| YRI | TBC1D3 | 38492693 | 2.9674  | 7.2267  | -1.7187 |

## 2\_TajimasD\_data

|     |        |          |         |         |         |
|-----|--------|----------|---------|---------|---------|
| YRI | TBC1D3 | 38497693 | 3.6514  | 7.3947  | -1.4792 |
| YRI | TBC1D3 | 38502693 | 3.6653  | 7.7309  | -1.5426 |
| YRI | TBC1D3 | 38507693 | 3.5223  | 8.9073  | -1.7935 |
| YRI | TBC1D3 | 38512693 | 3.1749  | 9.7476  | -2.0135 |
| YRI | TBC1D3 | 38517693 | 3.5409  | 9.7476  | -1.9013 |
| YRI | TBC1D3 | 38522693 | 3.7585  | 11.4282 | -2.0248 |
| YRI | TBC1D3 | 38527693 | 3.8201  | 12.6047 | -2.1147 |
| YRI | TBC1D3 | 38532693 | 10.1777 | 19.4952 | -1.4796 |
| YRI | TBC1D3 | 38537693 | 10.4529 | 18.3188 | -1.3261 |
| YRI | TBC1D3 | 38542693 | 4.5997  | 10.2518 | -1.652  |
| YRI | TBC1D3 | 38547693 | 4.087   | 10.4199 | -1.823  |
| YRI | TBC1D3 | 38552693 | 4.2887  | 9.7476  | -1.6723 |
| YRI | TBC1D3 | 38557693 | 4.0056  | 9.0754  | -1.6596 |
| YRI | TBC1D3 | 38562693 | 2.955   | 9.2434  | -2.0238 |
| CEU | TBC1D3 | 37623408 | 9.1886  | 8.0164  | 0.433   |
| CEU | TBC1D3 | 37628408 | 7.053   | 7.5047  | -0.1772 |
| CEU | TBC1D3 | 37633408 | 7.1482  | 8.5281  | -0.4815 |
| CEU | TBC1D3 | 37638408 | 7.0674  | 7.8459  | -0.2933 |
| CEU | TBC1D3 | 37643408 | 8.27    | 9.0398  | -0.2545 |
| CEU | TBC1D3 | 37648408 | 10.0779 | 10.0632 | 0.0044  |
| CEU | TBC1D3 | 37653408 | 6.362   | 6.4814  | -0.0535 |
| CEU | TBC1D3 | 37658408 | 5.2033  | 5.6286  | -0.2163 |
| CEU | TBC1D3 | 37663408 | 4.8068  | 4.9463  | -0.0796 |
| CEU | TBC1D3 | 37668408 | 6.3865  | 5.6286  | 0.3855  |
| CEU | TBC1D3 | 37673408 | 8.5193  | 7.1636  | 0.555   |
| CEU | TBC1D3 | 37678408 | 6.0087  | 6.1402  | -0.0619 |
| CEU | TBC1D3 | 37683408 | 4.4976  | 4.7757  | -0.1636 |
| CEU | TBC1D3 | 37688408 | 3.1424  | 4.0935  | -0.6395 |
| CEU | TBC1D3 | 37693408 | 4.9196  | 5.2874  | -0.1978 |
| CEU | TBC1D3 | 37698408 | 7.8475  | 6.9931  | 0.3575  |
| CEU | TBC1D3 | 37703408 | 6.4987  | 6.1402  | 0.1687  |
| CEU | TBC1D3 | 37708408 | 5.4018  | 5.458   | -0.0294 |
| CEU | TBC1D3 | 37713408 | 5.625   | 6.1402  | -0.2424 |
| CEU | TBC1D3 | 37718408 | 4.4438  | 5.6286  | -0.6027 |
| CEU | TBC1D3 | 37723408 | 3.6434  | 5.2874  | -0.884  |
| CEU | TBC1D3 | 37728408 | 3.0635  | 4.6052  | -0.936  |
| CEU | TBC1D3 | 37733408 | 3.2865  | 5.9697  | -1.2949 |
| CEU | TBC1D3 | 37738408 | 6.8773  | 8.3576  | -0.5262 |
| CEU | TBC1D3 | 37743408 | 7.7297  | 8.187   | -0.1657 |
| CEU | TBC1D3 | 37748408 | 5.7376  | 9.2104  | -1.1285 |
| CEU | TBC1D3 | 37753408 | 3.4898  | 7.5047  | -1.5753 |
| CEU | TBC1D3 | 37758408 | 2.0548  | 4.6052  | -1.5485 |
| CEU | TBC1D3 | 37763408 | 2.1853  | 3.9229  | -1.2119 |
| CEU | TBC1D3 | 37768408 | 4.1775  | 6.1402  | -0.9236 |
| CEU | TBC1D3 | 37773408 | 4.3824  | 6.8225  | -1.0441 |
| CEU | TBC1D3 | 37778408 | 3.7932  | 6.9931  | -1.3389 |
| CEU | TBC1D3 | 37783408 | 3.9417  | 7.8459  | -1.4708 |
| CEU | TBC1D3 | 37788408 | 3.3601  | 6.4814  | -1.399  |
| CEU | TBC1D3 | 37793408 | 3.0031  | 5.9697  | -1.4317 |

## 2\_TajimasD\_data

|     |        |          |         |         |         |
|-----|--------|----------|---------|---------|---------|
| CEU | TBC1D3 | 37798408 | 1.7454  | 6.8225  | -2.1725 |
| CEU | TBC1D3 | 37803408 | 2.1929  | 6.9931  | -2.0085 |
| CEU | TBC1D3 | 37808408 | 3.616   | 7.3342  | -1.4898 |
| CEU | TBC1D3 | 37813408 | 5.0759  | 8.8692  | -1.2765 |
| CEU | TBC1D3 | 37818408 | 5.0416  | 9.0398  | -1.3219 |
| CEU | TBC1D3 | 37823408 | 4.5795  | 7.8459  | -1.2305 |
| CEU | TBC1D3 | 37828408 | 12.1637 | 9.5515  | 0.8206  |
| CEU | TBC1D3 | 37833408 | 17.8635 | 11.5982 | 1.6416  |
| CEU | TBC1D3 | 37838408 | 10.7419 | 8.187   | 0.9256  |
| CEU | TBC1D3 | 37843408 | 5.4987  | 6.8225  | -0.5665 |
| CEU | TBC1D3 | 37848408 | 6.0851  | 6.8225  | -0.3155 |
| CEU | TBC1D3 | 37853408 | 4.3847  | 4.6052  | -0.1339 |
| CEU | TBC1D3 | 37858408 | 2.3894  | 4.7757  | -1.4035 |
| CEU | TBC1D3 | 37863408 | 1.8289  | 5.1169  | -1.82   |
| CEU | TBC1D3 | 37868408 | 2.2797  | 4.7757  | -1.468  |
| CEU | TBC1D3 | 37873408 | 3.2921  | 6.3108  | -1.3859 |
| CEU | TBC1D3 | 37878408 | 3.5512  | 6.4814  | -1.3134 |
| CEU | TBC1D3 | 37883408 | 3.0484  | 5.2874  | -1.2039 |
| CEU | TBC1D3 | 37888408 | 2.135   | 5.6286  | -1.7771 |
| CEU | TBC1D3 | 37893408 | 2.3403  | 5.9697  | -1.7516 |
| CEU | TBC1D3 | 37898408 | 2.3974  | 5.1169  | -1.5053 |
| CEU | TBC1D3 | 37903408 | 2.8823  | 5.1169  | -1.2369 |
| CEU | TBC1D3 | 37908408 | 3.7069  | 4.7757  | -0.6286 |
| CEU | TBC1D3 | 37913408 | 2.8054  | 4.4346  | -1.0222 |
| CEU | TBC1D3 | 37918408 | 2.2785  | 4.4346  | -1.3528 |
| CEU | TBC1D3 | 37923408 | 2.1626  | 4.6052  | -1.483  |
| CEU | TBC1D3 | 37928408 | 1.9487  | 5.458   | -1.8346 |
| CEU | TBC1D3 | 37933408 | 1.8707  | 5.1169  | -1.7968 |
| CEU | TBC1D3 | 37938408 | 2.4209  | 5.458   | -1.5877 |
| CEU | TBC1D3 | 37943408 | 2.4826  | 7.1636  | -1.9162 |
| CEU | TBC1D3 | 37948408 | 2.1136  | 7.5047  | -2.1152 |
| CEU | TBC1D3 | 37953408 | 2.4331  | 7.1636  | -1.9364 |
| CEU | TBC1D3 | 37958408 | 3.3989  | 6.4814  | -1.3816 |
| CEU | TBC1D3 | 37963408 | 3.006   | 5.7991  | -1.3834 |
| CEU | TBC1D3 | 37968408 | 2.1816  | 5.7991  | -1.7917 |
| CEU | TBC1D3 | 37973408 | 3.1478  | 6.6519  | -1.5342 |
| CEU | TBC1D3 | 37978408 | 3.2993  | 8.0164  | -1.7423 |
| CEU | TBC1D3 | 37983408 | 3.5968  | 9.0398  | -1.7996 |
| CEU | TBC1D3 | 37988408 | 2.9918  | 6.9931  | -1.6742 |
| CEU | TBC1D3 | 37993408 | 1.3271  | 4.2641  | -1.9065 |
| CEU | TBC1D3 | 37998408 | 1.9307  | 5.7991  | -1.916  |
| CEU | TBC1D3 | 38003408 | 5.4679  | 8.0164  | -0.9413 |
| CEU | TBC1D3 | 38008408 | 5.039   | 9.7221  | -1.4472 |
| CEU | TBC1D3 | 38013408 | 2.0532  | 9.3809  | -2.3409 |
| CEU | TBC1D3 | 38018408 | 2.9233  | 7.3342  | -1.7673 |
| CEU | TBC1D3 | 38023408 | 8.0414  | 8.187   | -0.0527 |
| CEU | TBC1D3 | 38028408 | 15.0946 | 11.0866 | 1.0956  |
| CEU | TBC1D3 | 38033408 | 14.4595 | 10.4043 | 1.1764  |
| CEU | TBC1D3 | 38038408 | 9.4038  | 7.6753  | 0.6644  |



## 2\_TajimasD\_data

|     |        |          |         |         |         |
|-----|--------|----------|---------|---------|---------|
| CEU | TBC1D3 | 38043408 | 6.5494  | 6.9931  | -0.1857 |
| CEU | TBC1D3 | 38048408 | 5.9847  | 6.1402  | -0.0732 |
| CEU | TBC1D3 | 38053408 | 7.4985  | 5.7991  | 0.8417  |
| CEU | TBC1D3 | 38058408 | 8.0247  | 5.7991  | 1.1023  |
| CEU | TBC1D3 | 38063408 | 11.5815 | 8.6987  | 0.9876  |
| CEU | TBC1D3 | 38068408 | 15.375  | 11.0866 | 1.1722  |
| CEU | TBC1D3 | 38073408 | 13.9326 | 10.5749 | 0.9594  |
| CEU | TBC1D3 | 38078408 | 8.12    | 7.5047  | 0.2414  |
| CEU | TBC1D3 | 38083408 | 5.5591  | 4.9463  | 0.3495  |
| CEU | TBC1D3 | 38088408 | 10.7621 | 7.6753  | 1.1865  |
| CEU | TBC1D3 | 38093408 | 10.9478 | 8.8692  | 0.6995  |
| CEU | TBC1D3 | 38098408 | 9.4601  | 8.0164  | 0.5332  |
| CEU | TBC1D3 | 38103408 | 10.8792 | 8.187   | 0.9753  |
| CEU | TBC1D3 | 38108408 | 21.1771 | 12.4511 | 2.1384  |
| CEU | TBC1D3 | 38113408 | 24.1098 | 13.8156 | 2.2863  |
| CEU | TBC1D3 | 38118408 | 18.0139 | 12.4511 | 1.3632  |
| CEU | TBC1D3 | 38123408 | 17.3295 | 11.5982 | 1.5016  |
| CEU | TBC1D3 | 38128408 | 14.7249 | 9.7221  | 1.546   |
| CEU | TBC1D3 | 38133408 | 12.2498 | 9.5515  | 0.8477  |
| CEU | TBC1D3 | 38138408 | 9.5236  | 9.8926  | -0.1122 |
| CEU | TBC1D3 | 38143408 | 16.7778 | 12.2805 | 1.1166  |
| CEU | TBC1D3 | 38148408 | 20.3092 | 11.5982 | 2.2823  |
| CEU | TBC1D3 | 38153408 | 16.5362 | 10.5749 | 1.7032  |
| CEU | TBC1D3 | 38158408 | 15.6683 | 9.5515  | 1.9217  |
| CEU | TBC1D3 | 38163408 | 19.6036 | 10.916  | 2.4095  |
| CEU | TBC1D3 | 38168408 | 19.5446 | 13.4744 | 1.3805  |
| CEU | TBC1D3 | 38173408 | 14.2956 | 10.916  | 0.9373  |
| CEU | TBC1D3 | 38178408 | 13.4539 | 9.2104  | 1.3789  |
| CEU | TBC1D3 | 38183408 | 10.3713 | 9.2104  | 0.3772  |
| CEU | TBC1D3 | 38188408 | 7.8227  | 6.8225  | 0.428   |
| CEU | TBC1D3 | 38193408 | 8.3797  | 6.1402  | 1.0538  |
| CEU | TBC1D3 | 38198408 | 5.5108  | 6.6519  | -0.4996 |
| CEU | TBC1D3 | 38203408 | 3.8442  | 6.1402  | -1.0804 |
| CEU | TBC1D3 | 38208408 | 5.9124  | 7.1636  | -0.5122 |
| CEU | TBC1D3 | 38213408 | 10.8942 | 8.3576  | 0.9017  |
| CEU | TBC1D3 | 38218408 | 13.6557 | 8.5281  | 1.7891  |
| CEU | TBC1D3 | 38223408 | 8.2171  | 6.1402  | 0.9773  |
| CEU | TBC1D3 | 38228408 | 3.4698  | 3.9229  | -0.316  |
| CEU | TBC1D3 | 38233408 | 1.6891  | 3.5818  | -1.4265 |
| CEU | TBC1D3 | 38238408 | 2.0612  | 5.7991  | -1.8514 |
| CEU | TBC1D3 | 38243408 | 4.0359  | 8.0164  | -1.4702 |
| CEU | TBC1D3 | 38248408 | 5.9771  | 7.8459  | -0.704  |
| CEU | TBC1D3 | 38253408 | 6.9854  | 7.5047  | -0.2037 |
| CEU | TBC1D3 | 38258408 | 5.4131  | 7.3342  | -0.7697 |
| CEU | TBC1D3 | 38263408 | 2.9375  | 5.2874  | -1.2636 |
| CEU | TBC1D3 | 38268408 | 2.825   | 5.1169  | -1.2686 |
| CEU | TBC1D3 | 38273408 | 3.0596  | 7.6753  | -1.7741 |
| CEU | TBC1D3 | 38278408 | 2.8885  | 8.5281  | -1.9677 |
| CEU | TBC1D3 | 38283408 | 2.0144  | 5.6286  | -1.8384 |

## 2\_TajimasD\_data

|     |        |          |        |        |         |
|-----|--------|----------|--------|--------|---------|
| CEU | TBC1D3 | 38288408 | 1.3995 | 4.6052 | -1.9463 |
| CEU | TBC1D3 | 38293408 | 1.2402 | 5.458  | -2.205  |
| CEU | TBC1D3 | 38298408 | 1.0181 | 4.6052 | -2.1779 |
| CEU | TBC1D3 | 38303408 | 1.7897 | 5.6286 | -1.9527 |
| CEU | TBC1D3 | 38308408 | 1.9136 | 7.8459 | -2.2348 |
| CEU | TBC1D3 | 38313408 | 2.0763 | 7.6753 | -2.1521 |
| CEU | TBC1D3 | 38318408 | 2.1029 | 5.458  | -1.754  |
| CEU | TBC1D3 | 38323408 | 1.3779 | 4.4346 | -1.9179 |
| CEU | TBC1D3 | 38328408 | 1.2628 | 5.1169 | -2.1333 |
| CEU | TBC1D3 | 38333408 | 1.1682 | 6.3108 | -2.3611 |
| CEU | TBC1D3 | 38338408 | 1.2942 | 5.9697 | -2.2565 |
| CEU | TBC1D3 | 38343408 | 2.1239 | 5.458  | -1.743  |
| CEU | TBC1D3 | 38348408 | 5.3766 | 6.4814 | -0.4952 |
| CEU | TBC1D3 | 38353408 | 7.4964 | 7.1636 | 0.1362  |
| CEU | TBC1D3 | 38358408 | 8.7712 | 8.5281 | 0.0848  |
| CEU | TBC1D3 | 38363408 | 7.5455 | 7.8459 | -0.1132 |
| CEU | TBC1D3 | 38368408 | 4.9511 | 8.0164 | -1.1322 |
| CEU | TBC1D3 | 38373408 | 4.368  | 9.8926 | -1.6799 |
| CEU | TBC1D3 | 38378408 | 4.147  | 8.8692 | -1.589  |
| CEU | TBC1D3 | 38383408 | 4.6627 | 7.6753 | -1.158  |
| CEU | TBC1D3 | 38388408 | 4.2338 | 7.1636 | -1.1993 |
| CEU | TBC1D3 | 38393408 | 3.6246 | 6.6519 | -1.3254 |
| CEU | TBC1D3 | 38398408 | 2.6605 | 6.8225 | -1.7809 |
| CEU | TBC1D3 | 38403408 | 2.4519 | 7.3342 | -1.9562 |
| CEU | TBC1D3 | 38408408 | 3.2744 | 6.3108 | -1.3941 |
| CEU | TBC1D3 | 38413408 | 4.1402 | 8.187  | -1.4661 |
| CEU | TBC1D3 | 38418408 | 3.9695 | 8.0164 | -1.4947 |
| CEU | TBC1D3 | 38423408 | 3.8145 | 6.6519 | -1.2423 |
| CEU | TBC1D3 | 38428408 | 3.4646 | 7.1636 | -1.5142 |
| CEU | TBC1D3 | 38433408 | 2.8613 | 5.1169 | -1.2485 |
| CEU | TBC1D3 | 38438408 | 2.5631 | 4.0935 | -1.0291 |
| CEU | TBC1D3 | 38443408 | 1.9921 | 4.9463 | -1.6848 |
| CEU | TBC1D3 | 38448408 | 1.4366 | 5.1169 | -2.0371 |
| CEU | TBC1D3 | 38453408 | 1.0418 | 3.9229 | -2.0095 |
| CEU | TBC1D3 | 38458408 | 1.7409 | 5.1169 | -1.8687 |
| CEU | TBC1D3 | 38463408 | 1.4628 | 4.6052 | -1.9079 |
| CEU | TBC1D3 | 38468408 | 1.8891 | 3.5818 | -1.2758 |
| CEU | TBC1D3 | 38473408 | 1.766  | 4.0935 | -1.5651 |
| CEU | TBC1D3 | 38478408 | 1.3831 | 4.2641 | -1.8702 |
| CEU | TBC1D3 | 38483408 | 1.8731 | 4.6052 | -1.6588 |
| CEU | TBC1D3 | 38488408 | 1.3511 | 4.2641 | -1.891  |
| CEU | TBC1D3 | 38493408 | 2.0087 | 4.2641 | -1.4641 |
| CEU | TBC1D3 | 38498408 | 1.8499 | 3.5818 | -1.3053 |
| CEU | TBC1D3 | 38503408 | 1.8848 | 4.4346 | -1.5998 |
| CEU | TBC1D3 | 38508408 | 1.6597 | 4.7757 | -1.8326 |
| CEU | TBC1D3 | 38513408 | 0.5663 | 3.9229 | -2.3411 |
| CEU | TBC1D3 | 38518408 | 1.0388 | 4.9463 | -2.2284 |
| CEU | TBC1D3 | 38523408 | 2.0101 | 5.7991 | -1.8767 |
| CEU | TBC1D3 | 38528408 | 2.9421 | 8.0164 | -1.8742 |

## 2\_TajimasD\_data

|     |        |          |        |         |         |
|-----|--------|----------|--------|---------|---------|
| CEU | TBC1D3 | 38533408 | 4.0066 | 11.2571 | -1.9537 |
| CEU | TBC1D3 | 38538408 | 3.9577 | 10.916  | -1.9299 |
| CEU | TBC1D3 | 38543408 | 2.9992 | 7.5047  | -1.7677 |
| CEU | TBC1D3 | 38548408 | 2.6825 | 5.458   | -1.451  |
| CEU | TBC1D3 | 38553408 | 2.954  | 5.6286  | -1.3605 |
| CEU | TBC1D3 | 38558408 | 2.3212 | 5.6286  | -1.6823 |
| CEU | TBC1D3 | 38563408 | 1.5597 | 4.7757  | -1.8915 |
| CEU | TBC1D3 | 38568408 | 1.7666 | 5.2874  | -1.8932 |
| CEU | TBC1D3 | 38573408 | 2.5739 | 5.458   | -1.5077 |
| CEU | TBC1D3 | 38578408 | 4.039  | 6.3108  | -1.043  |
| CEU | TBC1D3 | 38583408 | 5.1888 | 8.6987  | -1.2025 |
| CEU | TBC1D3 | 38588408 | 7.4684 | 8.3576  | -0.3161 |
| CEU | TBC1D3 | 38593408 | 8.0975 | 6.9931  | 0.4621  |
| CEU | TBC1D3 | 38598408 | 5.7906 | 5.458   | 0.1739  |
| CEU | TBC1D3 | 38603408 | 3.9951 | 6.1402  | -1.0094 |
| CEU | TBC1D3 | 38608408 | 3.6238 | 7.6753  | -1.5573 |
| CEU | TBC1D3 | 38613408 | 3.9031 | 6.8225  | -1.2492 |
| CEU | TBC1D3 | 38618408 | 5.1427 | 6.9931  | -0.7742 |
| CEU | TBC1D3 | 38623408 | 5.1103 | 7.3342  | -0.891  |
| CEU | TBC1D3 | 38628408 | 6.2288 | 7.5047  | -0.5006 |
| CEU | TBC1D3 | 38633408 | 8.5574 | 9.3809  | -0.2631 |
| CHB | TBC1D3 | 37623408 | 8.9431 | 9.1484  | -0.0669 |
| CHB | TBC1D3 | 37628408 | 6.5374 | 7.6237  | -0.4189 |
| CHB | TBC1D3 | 37633408 | 5.5995 | 7.6237  | -0.7806 |
| CHB | TBC1D3 | 37638408 | 5.557  | 6.6072  | -0.4613 |
| CHB | TBC1D3 | 37643408 | 6.9996 | 6.6072  | 0.1723  |
| CHB | TBC1D3 | 37648408 | 9.3152 | 8.979   | 0.1115  |
| CHB | TBC1D3 | 37653408 | 6.5125 | 7.7931  | -0.484  |
| CHB | TBC1D3 | 37658408 | 5.1194 | 5.5907  | -0.2405 |
| CHB | TBC1D3 | 37663408 | 4.9872 | 6.0989  | -0.5248 |
| CHB | TBC1D3 | 37668408 | 6.158  | 7.2848  | -0.4529 |
| CHB | TBC1D3 | 37673408 | 7.2798 | 8.3013  | -0.3643 |
| CHB | TBC1D3 | 37678408 | 4.7179 | 8.6402  | -1.3482 |
| CHB | TBC1D3 | 37683408 | 4.0653 | 6.7766  | -1.1639 |
| CHB | TBC1D3 | 37688408 | 2.9939 | 4.7436  | -1.0321 |
| CHB | TBC1D3 | 37693408 | 4.6549 | 6.6072  | -0.8575 |
| CHB | TBC1D3 | 37698408 | 7.921  | 8.1319  | -0.0767 |
| CHB | TBC1D3 | 37703408 | 6.6227 | 6.0989  | 0.2473  |
| CHB | TBC1D3 | 37708408 | 5.4392 | 5.7601  | -0.1594 |
| CHB | TBC1D3 | 37713408 | 5.7592 | 6.4378  | -0.3051 |
| CHB | TBC1D3 | 37718408 | 4.6941 | 6.0989  | -0.6631 |
| CHB | TBC1D3 | 37723408 | 3.8005 | 6.6072  | -1.2327 |
| CHB | TBC1D3 | 37728408 | 3.1386 | 7.6237  | -1.7296 |
| CHB | TBC1D3 | 37733408 | 2.5957 | 8.6402  | -2.0777 |
| CHB | TBC1D3 | 37738408 | 6.7598 | 9.9955  | -0.9716 |
| CHB | TBC1D3 | 37743408 | 8.1807 | 9.3178  | -0.3645 |
| CHB | TBC1D3 | 37748408 | 4.3916 | 8.1319  | -1.3595 |
| CHB | TBC1D3 | 37753408 | 1.5237 | 6.0989  | -2.1597 |
| CHB | TBC1D3 | 37758408 | 0.9617 | 3.8965  | -2.0527 |

## 2\_TajimasD\_data

|     |        |          |         |         |         |
|-----|--------|----------|---------|---------|---------|
| CHB | TBC1D3 | 37763408 | 1.5625  | 3.5577  | -1.5079 |
| CHB | TBC1D3 | 37768408 | 3.3286  | 7.1154  | -1.5551 |
| CHB | TBC1D3 | 37773408 | 3.4316  | 7.7931  | -1.6484 |
| CHB | TBC1D3 | 37778408 | 3.3804  | 7.2848  | -1.5694 |
| CHB | TBC1D3 | 37783408 | 4.2757  | 8.3013  | -1.4357 |
| CHB | TBC1D3 | 37788408 | 4.9412  | 7.9625  | -1.1196 |
| CHB | TBC1D3 | 37793408 | 4.3798  | 7.6237  | -1.2509 |
| CHB | TBC1D3 | 37798408 | 1.7963  | 6.4378  | -2.087  |
| CHB | TBC1D3 | 37803408 | 1.5762  | 7.2848  | -2.2947 |
| CHB | TBC1D3 | 37808408 | 1.8612  | 6.4378  | -2.0578 |
| CHB | TBC1D3 | 37813408 | 3.6735  | 6.2684  | -1.1951 |
| CHB | TBC1D3 | 37818408 | 4.1399  | 7.4543  | -1.3046 |
| CHB | TBC1D3 | 37823408 | 3.9296  | 8.8096  | -1.6476 |
| CHB | TBC1D3 | 37828408 | 13.8763 | 11.1814 | 0.7287  |
| CHB | TBC1D3 | 37833408 | 20.3299 | 10.6731 | 2.7274  |
| CHB | TBC1D3 | 37838408 | 11.5962 | 8.4708  | 1.0941  |
| CHB | TBC1D3 | 37843408 | 5.6636  | 6.4378  | -0.3481 |
| CHB | TBC1D3 | 37848408 | 6.9239  | 6.2684  | 0.3019  |
| CHB | TBC1D3 | 37853408 | 4.9347  | 6.4378  | -0.6758 |
| CHB | TBC1D3 | 37858408 | 2.3946  | 5.9295  | -1.7113 |
| CHB | TBC1D3 | 37863408 | 1.8692  | 5.0825  | -1.784  |
| CHB | TBC1D3 | 37868408 | 2.3145  | 5.4213  | -1.6291 |
| CHB | TBC1D3 | 37873408 | 3.5096  | 6.6072  | -1.3605 |
| CHB | TBC1D3 | 37878408 | 3.8195  | 6.0989  | -1.076  |
| CHB | TBC1D3 | 37883408 | 3.0967  | 6.0989  | -1.4172 |
| CHB | TBC1D3 | 37888408 | 1.7202  | 4.7436  | -1.7834 |
| CHB | TBC1D3 | 37893408 | 1.7089  | 5.2519  | -1.9109 |
| CHB | TBC1D3 | 37898408 | 1.9616  | 8.3013  | -2.261  |
| CHB | TBC1D3 | 37903408 | 2.8923  | 9.6567  | -2.0975 |
| CHB | TBC1D3 | 37908408 | 3.8262  | 8.979   | -1.7093 |
| CHB | TBC1D3 | 37913408 | 2.5477  | 6.2684  | -1.7136 |
| CHB | TBC1D3 | 37918408 | 1.85    | 4.5742  | -1.6588 |
| CHB | TBC1D3 | 37923408 | 1.9248  | 4.7436  | -1.6627 |
| CHB | TBC1D3 | 37928408 | 1.7314  | 5.5907  | -1.9691 |
| CHB | TBC1D3 | 37933408 | 1.6067  | 5.2519  | -1.966  |
| CHB | TBC1D3 | 37938408 | 2.6258  | 6.2684  | -1.6777 |
| CHB | TBC1D3 | 37943408 | 2.4895  | 8.6402  | -2.1142 |
| CHB | TBC1D3 | 37948408 | 1.0394  | 8.4708  | -2.6015 |
| CHB | TBC1D3 | 37953408 | 1.1702  | 8.6402  | -2.5677 |
| CHB | TBC1D3 | 37958408 | 2.6629  | 8.3013  | -2.0109 |
| CHB | TBC1D3 | 37963408 | 2.7223  | 7.7931  | -1.9165 |
| CHB | TBC1D3 | 37968408 | 2.1038  | 7.4543  | -2.1061 |
| CHB | TBC1D3 | 37973408 | 2.5905  | 6.2684  | -1.6939 |
| CHB | TBC1D3 | 37978408 | 2.2402  | 8.979   | -2.2355 |
| CHB | TBC1D3 | 37983408 | 2.478   | 11.1814 | -2.3533 |
| CHB | TBC1D3 | 37988408 | 2.2739  | 8.8096  | -2.2066 |
| CHB | TBC1D3 | 37993408 | 1.1393  | 6.2684  | -2.3623 |
| CHB | TBC1D3 | 37998408 | 1.4786  | 6.2684  | -2.206  |
| CHB | TBC1D3 | 38003408 | 4.4388  | 8.6402  | -1.4442 |

## 2\_TajimasD\_data

|     |        |          |         |         |         |
|-----|--------|----------|---------|---------|---------|
| CHB | TBC1D3 | 38008408 | 4.1947  | 11.3508 | -1.9078 |
| CHB | TBC1D3 | 38013408 | 1.5702  | 10.3343 | -2.5511 |
| CHB | TBC1D3 | 38018408 | 2.4746  | 8.4708  | -2.0991 |
| CHB | TBC1D3 | 38023408 | 7.5049  | 9.3178  | -0.5811 |
| CHB | TBC1D3 | 38028408 | 14.0158 | 9.9955  | 1.2072  |
| CHB | TBC1D3 | 38033408 | 13.1571 | 8.1319  | 1.8265  |
| CHB | TBC1D3 | 38038408 | 8.2972  | 5.9295  | 1.1462  |
| CHB | TBC1D3 | 38043408 | 5.6356  | 5.7601  | -0.0619 |
| CHB | TBC1D3 | 38048408 | 5.2618  | 6.2684  | -0.4636 |
| CHB | TBC1D3 | 38053408 | 6.6849  | 7.1154  | -0.1768 |
| CHB | TBC1D3 | 38058408 | 7.0638  | 6.0989  | 0.4555  |
| CHB | TBC1D3 | 38063408 | 10.7026 | 7.6237  | 1.1873  |
| CHB | TBC1D3 | 38068408 | 14.4561 | 10.8426 | 1.0057  |
| CHB | TBC1D3 | 38073408 | 13.0204 | 10.5037 | 0.7215  |
| CHB | TBC1D3 | 38078408 | 7.5781  | 7.4543  | 0.0487  |
| CHB | TBC1D3 | 38083408 | 5.2899  | 6.946   | -0.6952 |
| CHB | TBC1D3 | 38088408 | 10.8578 | 10.6731 | 0.0522  |
| CHB | TBC1D3 | 38093408 | 10.5711 | 10.8426 | -0.0756 |
| CHB | TBC1D3 | 38098408 | 9.0202  | 8.3013  | 0.2564  |
| CHB | TBC1D3 | 38103408 | 11.3139 | 8.1319  | 1.1566  |
| CHB | TBC1D3 | 38108408 | 22.7238 | 12.5367 | 2.4733  |
| CHB | TBC1D3 | 38113408 | 24.9189 | 14.2309 | 2.3013  |
| CHB | TBC1D3 | 38118408 | 16.6973 | 13.045  | 0.854   |
| CHB | TBC1D3 | 38123408 | 15.794  | 12.1979 | 0.8959  |
| CHB | TBC1D3 | 38128408 | 13.5943 | 10.1649 | 1.0138  |
| CHB | TBC1D3 | 38133408 | 11.7198 | 8.979   | 0.9092  |
| CHB | TBC1D3 | 38138408 | 9.1395  | 9.1484  | -0.0029 |
| CHB | TBC1D3 | 38143408 | 15.2208 | 11.8591 | 0.8601  |
| CHB | TBC1D3 | 38148408 | 19.0152 | 11.8591 | 1.8308  |
| CHB | TBC1D3 | 38153408 | 15.0198 | 11.1814 | 1.0379  |
| CHB | TBC1D3 | 38158408 | 14.1792 | 10.3343 | 1.1192  |
| CHB | TBC1D3 | 38163408 | 18.2301 | 12.5367 | 1.3823  |
| CHB | TBC1D3 | 38168408 | 18.5157 | 15.2474 | 0.659   |
| CHB | TBC1D3 | 38173408 | 14.3326 | 11.1814 | 0.8521  |
| CHB | TBC1D3 | 38178408 | 12.6916 | 7.9625  | 1.7525  |
| CHB | TBC1D3 | 38183408 | 9.6945  | 6.946   | 1.1537  |
| CHB | TBC1D3 | 38188408 | 7.7392  | 6.2684  | 0.6774  |
| CHB | TBC1D3 | 38193408 | 8.0592  | 8.3013  | -0.0863 |
| CHB | TBC1D3 | 38198408 | 5.0293  | 10.1649 | -1.5181 |
| CHB | TBC1D3 | 38203408 | 4.3505  | 8.8096  | -1.5055 |
| CHB | TBC1D3 | 38208408 | 5.905   | 6.6072  | -0.3084 |
| CHB | TBC1D3 | 38213408 | 9.592   | 6.6072  | 1.311   |
| CHB | TBC1D3 | 38218408 | 13.1888 | 7.1154  | 2.4942  |
| CHB | TBC1D3 | 38223408 | 8.518   | 6.6072  | 0.8392  |
| CHB | TBC1D3 | 38228408 | 3.9164  | 5.4213  | -0.7891 |
| CHB | TBC1D3 | 38233408 | 1.8195  | 3.8965  | -1.4527 |
| CHB | TBC1D3 | 38238408 | 1.7354  | 5.7601  | -1.9996 |
| CHB | TBC1D3 | 38243408 | 4.1588  | 8.6402  | -1.5404 |
| CHB | TBC1D3 | 38248408 | 5.7917  | 7.7931  | -0.7564 |

## 2\_TajimasD\_data

|     |        |          |        |        |         |
|-----|--------|----------|--------|--------|---------|
| CHB | TBC1D3 | 38253408 | 7.5355 | 6.6072 | 0.4077  |
| CHB | TBC1D3 | 38258408 | 5.7999 | 6.2684 | -0.2158 |
| CHB | TBC1D3 | 38263408 | 2.5361 | 5.5907 | -1.5585 |
| CHB | TBC1D3 | 38268408 | 2.7611 | 5.4213 | -1.3949 |
| CHB | TBC1D3 | 38273408 | 3.0348 | 7.4543 | -1.7396 |
| CHB | TBC1D3 | 38278408 | 2.1245 | 7.7931 | -2.1424 |
| CHB | TBC1D3 | 38283408 | 1.6994 | 5.5907 | -1.9854 |
| CHB | TBC1D3 | 38288408 | 1.7518 | 4.913  | -1.8082 |
| CHB | TBC1D3 | 38293408 | 0.8041 | 4.4048 | -2.2657 |
| CHB | TBC1D3 | 38298408 | 0.5547 | 4.2354 | -2.3961 |
| CHB | TBC1D3 | 38303408 | 1.1991 | 3.7271 | -1.8365 |
| CHB | TBC1D3 | 38308408 | 1.1709 | 5.0825 | -2.1716 |
| CHB | TBC1D3 | 38313408 | 0.9819 | 5.9295 | -2.3952 |
| CHB | TBC1D3 | 38318408 | 1.2332 | 5.9295 | -2.2735 |
| CHB | TBC1D3 | 38323408 | 0.9608 | 4.7436 | -2.2314 |
| CHB | TBC1D3 | 38328408 | 0.7938 | 5.2519 | -2.4044 |
| CHB | TBC1D3 | 38333408 | 0.696  | 5.7601 | -2.516  |
| CHB | TBC1D3 | 38338408 | 0.9398 | 4.7436 | -2.2438 |
| CHB | TBC1D3 | 38343408 | 2.0228 | 6.4378 | -1.9851 |
| CHB | TBC1D3 | 38348408 | 4.0777 | 7.6237 | -1.3674 |
| CHB | TBC1D3 | 38353408 | 6.4135 | 7.7931 | -0.5214 |
| CHB | TBC1D3 | 38358408 | 9.0704 | 7.4543 | 0.6361  |
| CHB | TBC1D3 | 38363408 | 7.4173 | 6.4378 | 0.4404  |
| CHB | TBC1D3 | 38368408 | 6.2882 | 6.946  | -0.2761 |
| CHB | TBC1D3 | 38373408 | 6.2644 | 7.6237 | -0.5242 |
| CHB | TBC1D3 | 38378408 | 6.2174 | 6.7766 | -0.24   |
| CHB | TBC1D3 | 38383408 | 7.743  | 6.0989 | 0.7761  |
| CHB | TBC1D3 | 38388408 | 6.2974 | 6.7766 | -0.2057 |
| CHB | TBC1D3 | 38393408 | 4.6115 | 6.946  | -0.9799 |
| CHB | TBC1D3 | 38398408 | 3.237  | 5.0825 | -1.0246 |
| CHB | TBC1D3 | 38403408 | 3.6151 | 5.4213 | -0.9471 |
| CHB | TBC1D3 | 38408408 | 4.6219 | 6.7766 | -0.9249 |
| CHB | TBC1D3 | 38413408 | 5.7668 | 7.2848 | -0.6102 |
| CHB | TBC1D3 | 38418408 | 6.0638 | 6.7766 | -0.306  |
| CHB | TBC1D3 | 38423408 | 6.2273 | 5.9295 | 0.1442  |
| CHB | TBC1D3 | 38428408 | 5.2589 | 4.5742 | 0.4169  |
| CHB | TBC1D3 | 38433408 | 3.2005 | 4.4048 | -0.7578 |
| CHB | TBC1D3 | 38438408 | 3.197  | 4.913  | -0.9815 |
| CHB | TBC1D3 | 38443408 | 2.7976 | 3.8965 | -0.7686 |
| CHB | TBC1D3 | 38448408 | 1.6705 | 2.8801 | -1.0906 |
| CHB | TBC1D3 | 38453408 | 1.4377 | 2.033  | -0.7099 |
| CHB | TBC1D3 | 38458408 | 3.0261 | 4.5742 | -0.9427 |
| CHB | TBC1D3 | 38463408 | 2.422  | 5.7601 | -1.6584 |
| CHB | TBC1D3 | 38468408 | 1.6374 | 3.8965 | -1.5801 |
| CHB | TBC1D3 | 38473408 | 2.0358 | 4.5742 | -1.5457 |
| CHB | TBC1D3 | 38478408 | 2.197  | 4.5742 | -1.4475 |
| CHB | TBC1D3 | 38483408 | 2.6901 | 4.5742 | -1.1473 |
| CHB | TBC1D3 | 38488408 | 1.7295 | 4.066  | -1.5756 |
| CHB | TBC1D3 | 38493408 | 2.423  | 3.7271 | -0.9474 |

## 2\_TajimasD\_data

|     |        |          |         |         |         |
|-----|--------|----------|---------|---------|---------|
| CHB | TBC1D3 | 38498408 | 3.0921  | 4.4048  | -0.826  |
| CHB | TBC1D3 | 38503408 | 1.9256  | 4.5742  | -1.6128 |
| CHB | TBC1D3 | 38508408 | 1.0704  | 6.2684  | -2.394  |
| CHB | TBC1D3 | 38513408 | 0.5603  | 6.0989  | -2.6145 |
| CHB | TBC1D3 | 38518408 | 0.9082  | 4.2354  | -2.166  |
| CHB | TBC1D3 | 38523408 | 1.3771  | 4.066   | -1.8132 |
| CHB | TBC1D3 | 38528408 | 1.7914  | 4.7436  | -1.7414 |
| CHB | TBC1D3 | 38533408 | 2.9756  | 6.4378  | -1.5567 |
| CHB | TBC1D3 | 38538408 | 3.3975  | 6.0989  | -1.2752 |
| CHB | TBC1D3 | 38543408 | 2.1057  | 3.8965  | -1.2525 |
| CHB | TBC1D3 | 38548408 | 1.6927  | 2.7106  | -0.9645 |
| CHB | TBC1D3 | 38553408 | 2.6893  | 3.0495  | -0.3098 |
| CHB | TBC1D3 | 38558408 | 2.1083  | 2.7106  | -0.5707 |
| CHB | TBC1D3 | 38563408 | 1.2989  | 2.3718  | -1.1325 |
| CHB | TBC1D3 | 38568408 | 1.2981  | 3.0495  | -1.5062 |
| CHB | TBC1D3 | 38573408 | 2.2071  | 2.7106  | -0.4771 |
| CHB | TBC1D3 | 38578408 | 3.9002  | 3.5577  | 0.2588  |
| CHB | TBC1D3 | 38583408 | 5.6097  | 6.6072  | -0.4381 |
| CHB | TBC1D3 | 38588408 | 8.3323  | 9.6567  | -0.4107 |
| CHB | TBC1D3 | 38593408 | 8.6667  | 8.8096  | -0.0482 |
| CHB | TBC1D3 | 38598408 | 5.9652  | 5.7601  | 0.1019  |
| CHB | TBC1D3 | 38603408 | 3.2994  | 4.4048  | -0.6956 |
| CHB | TBC1D3 | 38608408 | 2.8479  | 4.4048  | -0.9797 |
| CHB | TBC1D3 | 38613408 | 3.3638  | 5.2519  | -1.0183 |
| CHB | TBC1D3 | 38618408 | 3.3975  | 5.5907  | -1.119  |
| CHB | TBC1D3 | 38623408 | 3.0451  | 7.1154  | -1.6716 |
| CHB | TBC1D3 | 38628408 | 3.4845  | 8.6402  | -1.7722 |
| CHB | TBC1D3 | 38633408 | 4.0607  | 9.9955  | -1.7821 |
| YRI | TBC1D3 | 37623408 | 12.8725 | 10.756  | 0.5915  |
| YRI | TBC1D3 | 37628408 | 9.6986  | 11.4282 | -0.4566 |
| YRI | TBC1D3 | 37633408 | 9.0421  | 13.2769 | -0.9706 |
| YRI | TBC1D3 | 37638408 | 9.9086  | 13.9492 | -0.8837 |
| YRI | TBC1D3 | 37643408 | 10.8919 | 14.7895 | -0.8063 |
| YRI | TBC1D3 | 37648408 | 11.8616 | 14.4534 | -0.548  |
| YRI | TBC1D3 | 37653408 | 7.9565  | 11.2602 | -0.8844 |
| YRI | TBC1D3 | 37658408 | 6.9404  | 9.7476  | -0.86   |
| YRI | TBC1D3 | 37663408 | 7.2613  | 9.4115  | -0.6805 |
| YRI | TBC1D3 | 37668408 | 8.6926  | 11.4282 | -0.7222 |
| YRI | TBC1D3 | 37673408 | 11.1386 | 14.4534 | -0.7009 |
| YRI | TBC1D3 | 37678408 | 10.0684 | 12.4366 | -0.5774 |
| YRI | TBC1D3 | 37683408 | 8.0335  | 8.9073  | -0.291  |
| YRI | TBC1D3 | 37688408 | 4.468   | 6.3864  | -0.8658 |
| YRI | TBC1D3 | 37693408 | 7.7034  | 7.7309  | -0.0104 |
| YRI | TBC1D3 | 37698408 | 11.2164 | 10.924  | 0.0805  |
| YRI | TBC1D3 | 37703408 | 8.0064  | 8.7392  | -0.2484 |
| YRI | TBC1D3 | 37708408 | 6.8004  | 7.7309  | -0.3531 |
| YRI | TBC1D3 | 37713408 | 8.1562  | 9.9157  | -0.5305 |
| YRI | TBC1D3 | 37718408 | 7.7771  | 10.0837 | -0.6846 |
| YRI | TBC1D3 | 37723408 | 7.4123  | 8.7392  | -0.4498 |

## 2\_TajimasD\_data

|     |        |          |         |         |         |
|-----|--------|----------|---------|---------|---------|
| YRI | TBC1D3 | 37728408 | 6.8321  | 8.235   | -0.5023 |
| YRI | TBC1D3 | 37733408 | 5.8562  | 10.2518 | -1.2847 |
| YRI | TBC1D3 | 37738408 | 10.1306 | 13.1089 | -0.6909 |
| YRI | TBC1D3 | 37743408 | 12.1031 | 12.2685 | -0.0408 |
| YRI | TBC1D3 | 37748408 | 11.8936 | 11.2602 | 0.1696  |
| YRI | TBC1D3 | 37753408 | 8.9492  | 11.7644 | -0.7232 |
| YRI | TBC1D3 | 37758408 | 4.846   | 10.4199 | -1.6046 |
| YRI | TBC1D3 | 37763408 | 4.4634  | 8.7392  | -1.4494 |
| YRI | TBC1D3 | 37768408 | 8.2511  | 10.924  | -0.7362 |
| YRI | TBC1D3 | 37773408 | 8.3943  | 10.5879 | -0.6221 |
| YRI | TBC1D3 | 37778408 | 7.6974  | 10.4199 | -0.7837 |
| YRI | TBC1D3 | 37783408 | 9.3266  | 11.7644 | -0.6263 |
| YRI | TBC1D3 | 37788408 | 8.2223  | 11.4282 | -0.8464 |
| YRI | TBC1D3 | 37793408 | 7.9324  | 10.924  | -0.8239 |
| YRI | TBC1D3 | 37798408 | 6.415   | 8.9073  | -0.8301 |
| YRI | TBC1D3 | 37803408 | 6.8417  | 10.2518 | -0.9967 |
| YRI | TBC1D3 | 37808408 | 6.7725  | 11.9324 | -1.308  |
| YRI | TBC1D3 | 37813408 | 5.9611  | 12.2685 | -1.5576 |
| YRI | TBC1D3 | 37818408 | 6.863   | 14.4534 | -1.605  |
| YRI | TBC1D3 | 37823408 | 7.1578  | 13.9492 | -1.4853 |
| YRI | TBC1D3 | 37828408 | 13.7391 | 12.4366 | 0.3175  |
| YRI | TBC1D3 | 37833408 | 18.3488 | 12.4366 | 1.4414  |
| YRI | TBC1D3 | 37838408 | 10.7174 | 9.9157  | 0.2417  |
| YRI | TBC1D3 | 37843408 | 6.4903  | 9.4115  | -0.9245 |
| YRI | TBC1D3 | 37848408 | 8.2288  | 10.2518 | -0.5913 |
| YRI | TBC1D3 | 37853408 | 6.3881  | 8.7392  | -0.797  |
| YRI | TBC1D3 | 37858408 | 5.4644  | 7.5628  | -0.8124 |
| YRI | TBC1D3 | 37863408 | 5.1547  | 6.8906  | -0.7315 |
| YRI | TBC1D3 | 37868408 | 4.088   | 7.3947  | -1.3067 |
| YRI | TBC1D3 | 37873408 | 5.3804  | 9.5795  | -1.3073 |
| YRI | TBC1D3 | 37878408 | 5.1381  | 9.9157  | -1.4405 |
| YRI | TBC1D3 | 37883408 | 3.995   | 9.9157  | -1.7851 |
| YRI | TBC1D3 | 37888408 | 3.7984  | 9.4115  | -1.7765 |
| YRI | TBC1D3 | 37893408 | 5.3959  | 8.4031  | -1.0569 |
| YRI | TBC1D3 | 37898408 | 6.2341  | 11.4282 | -1.3713 |
| YRI | TBC1D3 | 37903408 | 9.411   | 14.1172 | -1.0176 |
| YRI | TBC1D3 | 37908408 | 11.0638 | 12.9408 | -0.4407 |
| YRI | TBC1D3 | 37913408 | 7.4303  | 11.4282 | -1.0555 |
| YRI | TBC1D3 | 37918408 | 5.5999  | 9.9157  | -1.3012 |
| YRI | TBC1D3 | 37923408 | 6.2559  | 10.0837 | -1.1362 |
| YRI | TBC1D3 | 37928408 | 8.1566  | 10.756  | -0.7264 |
| YRI | TBC1D3 | 37933408 | 6.677   | 8.9073  | -0.7428 |
| YRI | TBC1D3 | 37938408 | 7.1148  | 9.0754  | -0.6418 |
| YRI | TBC1D3 | 37943408 | 9.2974  | 9.9157  | -0.1864 |
| YRI | TBC1D3 | 37948408 | 7.383   | 9.7476  | -0.7244 |
| YRI | TBC1D3 | 37953408 | 9.6515  | 12.4366 | -0.679  |
| YRI | TBC1D3 | 37958408 | 10.7529 | 12.7727 | -0.4802 |
| YRI | TBC1D3 | 37963408 | 8.1337  | 10.756  | -0.7328 |
| YRI | TBC1D3 | 37968408 | 7.3702  | 10.0837 | -0.8054 |



## 2\_TajimasD\_data

|     |        |          |         |         |         |
|-----|--------|----------|---------|---------|---------|
| YRI | TBC1D3 | 37973408 | 7.7209  | 9.7476  | -0.6209 |
| YRI | TBC1D3 | 37978408 | 9.2638  | 11.4282 | -0.5714 |
| YRI | TBC1D3 | 37983408 | 10.1876 | 13.445  | -0.7377 |
| YRI | TBC1D3 | 37988408 | 8.7573  | 12.4366 | -0.897  |
| YRI | TBC1D3 | 37993408 | 6.3702  | 9.5795  | -0.9992 |
| YRI | TBC1D3 | 37998408 | 8.1929  | 9.5795  | -0.4317 |
| YRI | TBC1D3 | 38003408 | 12.4722 | 13.613  | -0.2553 |
| YRI | TBC1D3 | 38008408 | 14.7387 | 16.9743 | -0.4055 |
| YRI | TBC1D3 | 38013408 | 12.6438 | 14.6214 | -0.4136 |
| YRI | TBC1D3 | 38018408 | 9.394   | 9.7476  | -0.1083 |
| YRI | TBC1D3 | 38023408 | 10.4493 | 10.756  | -0.0857 |
| YRI | TBC1D3 | 38028408 | 13.9639 | 14.6214 | -0.1375 |
| YRI | TBC1D3 | 38033408 | 11.8591 | 12.6047 | -0.1795 |
| YRI | TBC1D3 | 38038408 | 8.8129  | 8.9073  | -0.0314 |
| YRI | TBC1D3 | 38043408 | 7.7116  | 8.4031  | -0.243  |
| YRI | TBC1D3 | 38048408 | 8.0161  | 9.0754  | -0.3468 |
| YRI | TBC1D3 | 38053408 | 9.3088  | 10.924  | -0.4449 |
| YRI | TBC1D3 | 38058408 | 6.5766  | 10.4199 | -1.1064 |
| YRI | TBC1D3 | 38063408 | 8.394   | 11.9324 | -0.897  |
| YRI | TBC1D3 | 38068408 | 12.2458 | 16.134  | -0.7403 |
| YRI | TBC1D3 | 38073408 | 13.3513 | 16.302  | -0.5563 |
| YRI | TBC1D3 | 38078408 | 10.3577 | 14.2853 | -0.8398 |
| YRI | TBC1D3 | 38083408 | 7.7501  | 12.1005 | -1.0884 |
| YRI | TBC1D3 | 38088408 | 12.5279 | 13.445  | -0.2077 |
| YRI | TBC1D3 | 38093408 | 12.8457 | 14.6214 | -0.3714 |
| YRI | TBC1D3 | 38098408 | 10.6022 | 15.6298 | -0.9867 |
| YRI | TBC1D3 | 38103408 | 11.805  | 16.302  | -0.8478 |
| YRI | TBC1D3 | 38108408 | 21.2632 | 18.3188 | 0.4964  |
| YRI | TBC1D3 | 38113408 | 24.5334 | 18.1507 | 1.0856  |
| YRI | TBC1D3 | 38118408 | 19.7772 | 16.134  | 0.6937  |
| YRI | TBC1D3 | 38123408 | 19.5169 | 16.6382 | 0.5322  |
| YRI | TBC1D3 | 38128408 | 17.4497 | 15.7978 | 0.3209  |
| YRI | TBC1D3 | 38133408 | 14.3254 | 15.6298 | -0.256  |
| YRI | TBC1D3 | 38138408 | 11.552  | 15.4617 | -0.7753 |
| YRI | TBC1D3 | 38143408 | 18.5727 | 17.3104 | 0.2247  |
| YRI | TBC1D3 | 38148408 | 19.9324 | 15.9659 | 0.7628  |
| YRI | TBC1D3 | 38153408 | 16.457  | 14.7895 | 0.345   |
| YRI | TBC1D3 | 38158408 | 16.4369 | 16.134  | 0.0577  |
| YRI | TBC1D3 | 38163408 | 19.9004 | 18.991  | 0.1481  |
| YRI | TBC1D3 | 38168408 | 20.6057 | 23.0245 | -0.3271 |
| YRI | TBC1D3 | 38173408 | 14.5549 | 20.1675 | -0.8626 |
| YRI | TBC1D3 | 38178408 | 12.3088 | 15.7978 | -0.6778 |
| YRI | TBC1D3 | 38183408 | 9.3896  | 15.9659 | -1.2647 |
| YRI | TBC1D3 | 38188408 | 7.7415  | 13.1089 | -1.2451 |
| YRI | TBC1D3 | 38193408 | 9.6862  | 13.445  | -0.8513 |
| YRI | TBC1D3 | 38198408 | 13.5683 | 16.134  | -0.4885 |
| YRI | TBC1D3 | 38203408 | 11.5212 | 14.7895 | -0.6761 |
| YRI | TBC1D3 | 38208408 | 8.2033  | 11.9324 | -0.9453 |
| YRI | TBC1D3 | 38213408 | 11.7973 | 12.6047 | -0.1944 |

## 2\_TajimasD\_data

|     |        |          |         |         |         |
|-----|--------|----------|---------|---------|---------|
| YRI | TBC1D3 | 38218408 | 15.0663 | 14.4534 | 0.1296  |
| YRI | TBC1D3 | 38223408 | 12.5447 | 13.445  | -0.2039 |
| YRI | TBC1D3 | 38228408 | 7.4052  | 13.445  | -1.3678 |
| YRI | TBC1D3 | 38233408 | 5.1192  | 11.4282 | -1.6656 |
| YRI | TBC1D3 | 38238408 | 5.0832  | 10.4199 | -1.5363 |
| YRI | TBC1D3 | 38243408 | 7.4372  | 10.924  | -0.9603 |
| YRI | TBC1D3 | 38248408 | 6.8874  | 9.5795  | -0.8381 |
| YRI | TBC1D3 | 38253408 | 8.3896  | 9.7476  | -0.416  |
| YRI | TBC1D3 | 38258408 | 8.9337  | 10.2518 | -0.3852 |
| YRI | TBC1D3 | 38263408 | 5.5239  | 9.7476  | -1.2939 |
| YRI | TBC1D3 | 38268408 | 5.0305  | 8.7392  | -1.2571 |
| YRI | TBC1D3 | 38273408 | 6.9457  | 10.4199 | -1.0001 |
| YRI | TBC1D3 | 38278408 | 8.527   | 13.1089 | -1.0628 |
| YRI | TBC1D3 | 38283408 | 4.8141  | 8.9073  | -1.3633 |
| YRI | TBC1D3 | 38288408 | 4.0562  | 7.2267  | -1.2794 |
| YRI | TBC1D3 | 38293408 | 5.9082  | 10.5879 | -1.3271 |
| YRI | TBC1D3 | 38298408 | 6.0942  | 11.9324 | -1.48   |
| YRI | TBC1D3 | 38303408 | 6.7389  | 12.6047 | -1.4121 |
| YRI | TBC1D3 | 38308408 | 6.3228  | 12.9408 | -1.554  |
| YRI | TBC1D3 | 38313408 | 5.4682  | 12.2685 | -1.6793 |
| YRI | TBC1D3 | 38318408 | 5.9029  | 10.5879 | -1.3286 |
| YRI | TBC1D3 | 38323408 | 4.8783  | 8.067   | -1.1636 |
| YRI | TBC1D3 | 38328408 | 5.8962  | 9.7476  | -1.1798 |
| YRI | TBC1D3 | 38333408 | 6.618   | 11.9324 | -1.3472 |
| YRI | TBC1D3 | 38338408 | 6.5225  | 11.4282 | -1.2951 |
| YRI | TBC1D3 | 38343408 | 7.0809  | 10.756  | -1.027  |
| YRI | TBC1D3 | 38348408 | 8.3597  | 10.4199 | -0.5931 |
| YRI | TBC1D3 | 38353408 | 9.9665  | 10.5879 | -0.1762 |
| YRI | TBC1D3 | 38358408 | 11.863  | 12.6047 | -0.1785 |
| YRI | TBC1D3 | 38363408 | 10.3672 | 11.9324 | -0.3968 |
| YRI | TBC1D3 | 38368408 | 7.0367  | 10.924  | -1.0706 |
| YRI | TBC1D3 | 38373408 | 6.5339  | 11.7644 | -1.3437 |
| YRI | TBC1D3 | 38378408 | 6.831   | 10.924  | -1.1273 |
| YRI | TBC1D3 | 38383408 | 6.6417  | 11.0921 | -1.2083 |
| YRI | TBC1D3 | 38388408 | 5.519   | 11.0921 | -1.5131 |
| YRI | TBC1D3 | 38393408 | 4.5009  | 8.9073  | -1.4676 |
| YRI | TBC1D3 | 38398408 | 3.5549  | 9.0754  | -1.8071 |
| YRI | TBC1D3 | 38403408 | 5.136   | 11.7644 | -1.7029 |
| YRI | TBC1D3 | 38408408 | 5.2118  | 9.9157  | -1.4182 |
| YRI | TBC1D3 | 38413408 | 5.2235  | 8.5712  | -1.1553 |
| YRI | TBC1D3 | 38418408 | 5.4152  | 9.0754  | -1.1982 |
| YRI | TBC1D3 | 38423408 | 5.0119  | 8.7392  | -1.2635 |
| YRI | TBC1D3 | 38428408 | 4.457   | 8.067   | -1.3173 |
| YRI | TBC1D3 | 38433408 | 4.0169  | 7.7309  | -1.4092 |
| YRI | TBC1D3 | 38438408 | 4.3387  | 7.7309  | -1.2871 |
| YRI | TBC1D3 | 38443408 | 4.222   | 7.5628  | -1.2933 |
| YRI | TBC1D3 | 38448408 | 3.2043  | 6.8906  | -1.5533 |
| YRI | TBC1D3 | 38453408 | 2.9085  | 6.3864  | -1.5697 |
| YRI | TBC1D3 | 38458408 | 5.4347  | 8.4031  | -1.0433 |

## 2\_TajimasD\_data

|     |        |          |         |         |         |
|-----|--------|----------|---------|---------|---------|
| YRI | TBC1D3 | 38463408 | 4.5669  | 8.235   | -1.3134 |
| YRI | TBC1D3 | 38468408 | 4.1315  | 6.8906  | -1.1626 |
| YRI | TBC1D3 | 38473408 | 3.8363  | 7.2267  | -1.3681 |
| YRI | TBC1D3 | 38478408 | 2.4284  | 7.0586  | -1.9088 |
| YRI | TBC1D3 | 38483408 | 3.3442  | 7.0586  | -1.5313 |
| YRI | TBC1D3 | 38488408 | 2.8471  | 7.2267  | -1.7673 |
| YRI | TBC1D3 | 38493408 | 2.9677  | 7.3947  | -1.7493 |
| YRI | TBC1D3 | 38498408 | 3.5383  | 7.2267  | -1.4883 |
| YRI | TBC1D3 | 38503408 | 3.9873  | 7.8989  | -1.4552 |
| YRI | TBC1D3 | 38508408 | 3.5592  | 9.0754  | -1.8057 |
| YRI | TBC1D3 | 38513408 | 3.7722  | 9.7476  | -1.8305 |
| YRI | TBC1D3 | 38518408 | 3.7829  | 10.2518 | -1.8907 |
| YRI | TBC1D3 | 38523408 | 2.9917  | 11.7644 | -2.2538 |
| YRI | TBC1D3 | 38528408 | 5.1984  | 14.7895 | -1.9841 |
| YRI | TBC1D3 | 38533408 | 10.0246 | 18.6549 | -1.4298 |
| YRI | TBC1D3 | 38538408 | 8.9492  | 15.7978 | -1.3304 |
| YRI | TBC1D3 | 38543408 | 4.7928  | 10.4199 | -1.6199 |
| YRI | TBC1D3 | 38548408 | 4.2551  | 11.0921 | -1.8563 |
| YRI | TBC1D3 | 38553408 | 4.7271  | 10.756  | -1.6848 |
| YRI | TBC1D3 | 38558408 | 3.9226  | 8.4031  | -1.5747 |
| YRI | TBC1D3 | 38563408 | 2.3507  | 8.235   | -2.1069 |
| YRI | TBC1D3 | 38568408 | 3.4424  | 8.5712  | -1.77   |
| YRI | TBC1D3 | 38573408 | 4.3046  | 8.7392  | -1.5032 |
| YRI | TBC1D3 | 38578408 | 4.6308  | 10.4199 | -1.6665 |
| YRI | TBC1D3 | 38583408 | 6.0603  | 11.9324 | -1.4886 |
| YRI | TBC1D3 | 38588408 | 10.2119 | 15.1256 | -0.995  |
| YRI | TBC1D3 | 38593408 | 10.8129 | 14.7895 | -0.8226 |
| YRI | TBC1D3 | 38598408 | 6.6056  | 11.2602 | -1.246  |
| YRI | TBC1D3 | 38603408 | 4.0254  | 10.0837 | -1.7982 |
| YRI | TBC1D3 | 38608408 | 4.3234  | 9.0754  | -1.5555 |
| YRI | TBC1D3 | 38613408 | 6.0847  | 10.756  | -1.3054 |
| YRI | TBC1D3 | 38618408 | 7.0552  | 10.4199 | -0.9686 |
| YRI | TBC1D3 | 38623408 | 6.8068  | 10.4199 | -1.0401 |
| YRI | TBC1D3 | 38628408 | 8.6524  | 11.5963 | -0.7666 |
| YRI | TBC1D3 | 38633408 | 11.8447 | 11.7644 | 0.0206  |
| CEU | TBC1D3 | 37686659 | 4.1499  | 4.0935  | 0.0379  |
| CEU | TBC1D3 | 37691659 | 2.7584  | 3.7524  | -0.7201 |
| CEU | TBC1D3 | 37696659 | 6.8295  | 6.6519  | 0.0778  |
| CEU | TBC1D3 | 37701659 | 8.1532  | 6.9931  | 0.4854  |
| CEU | TBC1D3 | 37706659 | 6.5382  | 6.4814  | 0.0255  |
| CEU | TBC1D3 | 37711659 | 5.1128  | 6.3108  | -0.55   |
| CEU | TBC1D3 | 37716659 | 3.4082  | 5.2874  | -1.0105 |
| CEU | TBC1D3 | 37721659 | 3.898   | 5.1169  | -0.6747 |
| CEU | TBC1D3 | 37726659 | 3.8427  | 4.6052  | -0.4629 |
| CEU | TBC1D3 | 37731659 | 3.356   | 5.1169  | -0.9747 |
| CEU | TBC1D3 | 37736659 | 5.3948  | 7.1636  | -0.7241 |
| CEU | TBC1D3 | 37741659 | 8.0153  | 8.8692  | -0.2873 |
| CEU | TBC1D3 | 37746659 | 7.2569  | 10.2337 | -0.877  |
| CEU | TBC1D3 | 37751659 | 3.6737  | 7.5047  | -1.5031 |

## 2\_TajimasD\_data

|     |        |          |         |         |         |
|-----|--------|----------|---------|---------|---------|
| CEU | TBC1D3 | 37756659 | 2.2944  | 4.9463  | -1.5124 |
| CEU | TBC1D3 | 37761659 | 2.2707  | 4.2641  | -1.294  |
| CEU | TBC1D3 | 37766659 | 2.7514  | 4.9463  | -1.2517 |
| CEU | TBC1D3 | 37771659 | 4.6599  | 7.1636  | -1.0249 |
| CEU | TBC1D3 | 37776659 | 4.4465  | 7.3342  | -1.157  |
| CEU | TBC1D3 | 37781659 | 4.0122  | 7.6753  | -1.408  |
| CEU | TBC1D3 | 37786659 | 3.9652  | 6.4814  | -1.1278 |
| CEU | TBC1D3 | 37791659 | 3.0219  | 5.9697  | -1.4226 |
| CEU | TBC1D3 | 37796659 | 1.7829  | 6.6519  | -2.1317 |
| CEU | TBC1D3 | 37801659 | 1.5529  | 6.6519  | -2.2324 |
| CEU | TBC1D3 | 37806659 | 3.2101  | 6.4814  | -1.4662 |
| CEU | TBC1D3 | 37811659 | 5.1459  | 8.5281  | -1.1801 |
| CEU | TBC1D3 | 37816659 | 5.0153  | 10.0632 | -1.5106 |
| CEU | TBC1D3 | 37821659 | 4.1239  | 7.6753  | -1.3651 |
| CEU | TBC1D3 | 37826659 | 8.8128  | 8.187   | 0.2267  |
| CEU | TBC1D3 | 37831659 | 18.4914 | 12.4511 | 1.4803  |
| CEU | TBC1D3 | 37836659 | 14.0724 | 10.0632 | 1.1998  |
| CEU | TBC1D3 | 37841659 | 5.2243  | 5.458   | -0.1222 |
| CEU | TBC1D3 | 37846659 | 5.4376  | 6.8225  | -0.5926 |
| CEU | TBC1D3 | 37851659 | 5.1062  | 6.1402  | -0.4866 |
| CEU | TBC1D3 | 37856659 | 3.2519  | 4.9463  | -0.9663 |
| CEU | TBC1D3 | 37861659 | 1.7401  | 4.7757  | -1.7854 |
| CEU | TBC1D3 | 37866659 | 2.6477  | 4.9463  | -1.3109 |
| CEU | TBC1D3 | 37871659 | 1.9963  | 4.9463  | -1.6824 |
| CEU | TBC1D3 | 37876659 | 3.5211  | 6.3108  | -1.2808 |
| CEU | TBC1D3 | 37881659 | 3.8493  | 6.4814  | -1.1797 |
| CEU | TBC1D3 | 37886659 | 1.9891  | 4.6052  | -1.5884 |
| CEU | TBC1D3 | 37891659 | 2.403   | 5.9697  | -1.7213 |
| CEU | TBC1D3 | 37896659 | 2.0707  | 6.1402  | -1.915  |
| CEU | TBC1D3 | 37901659 | 3.1113  | 5.2874  | -1.1701 |
| CEU | TBC1D3 | 37906659 | 3.5803  | 4.4346  | -0.536  |
| CEU | TBC1D3 | 37911659 | 2.7056  | 4.0935  | -0.9333 |
| CEU | TBC1D3 | 37916659 | 1.8693  | 4.6052  | -1.6611 |
| CEU | TBC1D3 | 37921659 | 1.9161  | 4.2641  | -1.5242 |
| CEU | TBC1D3 | 37926659 | 2.8495  | 5.458   | -1.3637 |
| CEU | TBC1D3 | 37931659 | 1.9693  | 5.9697  | -1.9306 |
| CEU | TBC1D3 | 37936659 | 2.4209  | 5.458   | -1.5877 |
| CEU | TBC1D3 | 37941659 | 2.9534  | 7.3342  | -1.7553 |
| CEU | TBC1D3 | 37946659 | 1.5492  | 6.8225  | -2.2564 |
| CEU | TBC1D3 | 37951659 | 2.2307  | 6.8225  | -1.9648 |
| CEU | TBC1D3 | 37956659 | 3.3152  | 6.4814  | -1.4191 |
| CEU | TBC1D3 | 37961659 | 2.7557  | 4.6052  | -1.1229 |
| CEU | TBC1D3 | 37966659 | 2.6127  | 6.8225  | -1.8014 |
| CEU | TBC1D3 | 37971659 | 3.542   | 8.0164  | -1.6526 |
| CEU | TBC1D3 | 37976659 | 3.2261  | 7.6753  | -1.7102 |
| CEU | TBC1D3 | 37981659 | 3.3313  | 8.187   | -1.7591 |
| CEU | TBC1D3 | 37986659 | 2.7549  | 6.4814  | -1.6703 |
| CEU | TBC1D3 | 37991659 | 1.7013  | 5.6286  | -1.9977 |
| CEU | TBC1D3 | 37996659 | 1.4442  | 4.7757  | -1.9594 |

## 2\_TajimasD\_data

|     |        |          |         |         |         |
|-----|--------|----------|---------|---------|---------|
| CEU | TBC1D3 | 38001659 | 3.5246  | 6.1402  | -1.2308 |
| CEU | TBC1D3 | 38006659 | 5.8644  | 10.2337 | -1.2872 |
| CEU | TBC1D3 | 38011659 | 3.8184  | 10.2337 | -1.89   |
| CEU | TBC1D3 | 38016659 | 3.0814  | 8.187   | -1.8497 |
| CEU | TBC1D3 | 38021659 | 7.0519  | 8.0164  | -0.3562 |
| CEU | TBC1D3 | 38026659 | 9.6619  | 9.5515  | 0.0347  |
| CEU | TBC1D3 | 38031659 | 13.4921 | 9.8926  | 1.0945  |
| CEU | TBC1D3 | 38036659 | 13.9221 | 8.6987  | 1.7895  |
| CEU | TBC1D3 | 38041659 | 8.1336  | 8.0164  | 0.0433  |
| CEU | TBC1D3 | 38046659 | 6.4181  | 6.4814  | -0.0284 |
| CEU | TBC1D3 | 38051659 | 5.96    | 4.9463  | 0.5781  |
| CEU | TBC1D3 | 38056659 | 5.4473  | 4.7757  | 0.395   |
| CEU | TBC1D3 | 38061659 | 11.3199 | 8.0164  | 1.2202  |
| CEU | TBC1D3 | 38066659 | 15.49   | 10.916  | 1.2686  |
| CEU | TBC1D3 | 38071659 | 15.9289 | 10.916  | 1.3903  |
| CEU | TBC1D3 | 38076659 | 10.4438 | 8.8692  | 0.5299  |
| CEU | TBC1D3 | 38081659 | 4.8056  | 5.7991  | -0.4921 |
| CEU | TBC1D3 | 38086659 | 7.8804  | 6.8225  | 0.4527  |
| CEU | TBC1D3 | 38091659 | 9.6621  | 7.6753  | 0.7637  |
| CEU | TBC1D3 | 38096659 | 10.0383 | 7.6753  | 0.9083  |
| CEU | TBC1D3 | 38101659 | 9.8644  | 8.5281  | 0.4663  |
| CEU | TBC1D3 | 38106659 | 13.7685 | 9.7221  | 1.2505  |
| CEU | TBC1D3 | 38111659 | 26.0069 | 14.3272 | 2.5059  |
| CEU | TBC1D3 | 38116659 | 25.7292 | 15.0095 | 2.2004  |
| CEU | TBC1D3 | 38121659 | 17.129  | 11.7688 | 1.3853  |
| CEU | TBC1D3 | 38126659 | 16.5785 | 10.7454 | 1.6419  |
| CEU | TBC1D3 | 38131659 | 11.9888 | 9.3809  | 0.8331  |
| CEU | TBC1D3 | 38136659 | 8.9497  | 9.5515  | -0.1891 |
| CEU | TBC1D3 | 38141659 | 14.7778 | 11.0866 | 1.009   |
| CEU | TBC1D3 | 38146659 | 20.2404 | 12.1099 | 2.0454  |
| CEU | TBC1D3 | 38151659 | 16.1214 | 10.4043 | 1.6585  |
| CEU | TBC1D3 | 38156659 | 14.2453 | 9.5515  | 1.4746  |
| CEU | TBC1D3 | 38161659 | 20.8642 | 11.9394 | 2.2754  |
| CEU | TBC1D3 | 38166659 | 20.6372 | 12.4511 | 2.0061  |
| CEU | TBC1D3 | 38171659 | 15.0423 | 11.2571 | 1.02    |
| CEU | TBC1D3 | 38176659 | 13.5986 | 10.2337 | 0.9913  |
| CEU | TBC1D3 | 38181659 | 11.2775 | 9.2104  | 0.6717  |
| CEU | TBC1D3 | 38186659 | 8.2424  | 6.9931  | 0.5227  |
| CEU | TBC1D3 | 38191659 | 8.4649  | 6.4814  | 0.889   |
| CEU | TBC1D3 | 38196659 | 6.6648  | 6.4814  | 0.0822  |
| CEU | TBC1D3 | 38201659 | 5.1447  | 6.6519  | -0.6599 |
| CEU | TBC1D3 | 38206659 | 4.8759  | 7.1636  | -0.9365 |
| CEU | TBC1D3 | 38211659 | 9.8093  | 7.8459  | 0.7396  |
| CEU | TBC1D3 | 38216659 | 12.7384 | 8.0164  | 1.7441  |
| CEU | TBC1D3 | 38221659 | 8.8994  | 6.6519  | 0.984   |
| CEU | TBC1D3 | 38226659 | 5.1616  | 4.9463  | 0.1228  |
| CEU | TBC1D3 | 38231659 | 1.6372  | 3.2407  | -1.3148 |
| CEU | TBC1D3 | 38236659 | 2.1107  | 5.458   | -1.7499 |
| CEU | TBC1D3 | 38241659 | 3.6586  | 8.187   | -1.6405 |

## 2\_TajimasD\_data

|     |        |          |        |         |         |
|-----|--------|----------|--------|---------|---------|
| CEU | TBC1D3 | 38246659 | 4.7745 | 7.3342  | -1.0256 |
| CEU | TBC1D3 | 38251659 | 6.6968 | 6.4814  | 0.0965  |
| CEU | TBC1D3 | 38256659 | 6.886  | 7.8459  | -0.3616 |
| CEU | TBC1D3 | 38261659 | 4.0254 | 6.4814  | -1.1008 |
| CEU | TBC1D3 | 38266659 | 2.3496 | 4.2641  | -1.2428 |
| CEU | TBC1D3 | 38271659 | 2.9804 | 6.4814  | -1.5692 |
| CEU | TBC1D3 | 38276659 | 2.7784 | 8.0164  | -1.9347 |
| CEU | TBC1D3 | 38281659 | 2.088  | 6.9931  | -2.0524 |
| CEU | TBC1D3 | 38286659 | 1.9839 | 5.9697  | -1.9236 |
| CEU | TBC1D3 | 38291659 | 1.1777 | 4.6052  | -2.081  |
| CEU | TBC1D3 | 38296659 | 0.9703 | 4.7757  | -2.2381 |
| CEU | TBC1D3 | 38301659 | 1.4605 | 5.6286  | -2.1201 |
| CEU | TBC1D3 | 38306659 | 1.8722 | 6.9931  | -2.1427 |
| CEU | TBC1D3 | 38311659 | 2.2346 | 8.3576  | -2.1765 |
| CEU | TBC1D3 | 38316659 | 2.0746 | 6.1402  | -1.9132 |
| CEU | TBC1D3 | 38321659 | 1.679  | 4.6052  | -1.7766 |
| CEU | TBC1D3 | 38326659 | 1.3706 | 4.9463  | -2.0392 |
| CEU | TBC1D3 | 38331659 | 0.8839 | 5.2874  | -2.3678 |
| CEU | TBC1D3 | 38336659 | 1.2942 | 6.1402  | -2.2804 |
| CEU | TBC1D3 | 38341659 | 1.9215 | 5.9697  | -1.9537 |
| CEU | TBC1D3 | 38346659 | 3.6564 | 5.6286  | -1.0032 |
| CEU | TBC1D3 | 38351659 | 6.1804 | 5.9697  | 0.1017  |
| CEU | TBC1D3 | 38356659 | 8.5343 | 8.3576  | 0.0628  |
| CEU | TBC1D3 | 38361659 | 8.9942 | 9.2104  | -0.0703 |
| CEU | TBC1D3 | 38366659 | 5.6221 | 7.5047  | -0.7386 |
| CEU | TBC1D3 | 38371659 | 4.3572 | 8.8692  | -1.5183 |
| CEU | TBC1D3 | 38376659 | 4.8798 | 10.0632 | -1.5512 |
| CEU | TBC1D3 | 38381659 | 4.4846 | 8.187   | -1.3413 |
| CEU | TBC1D3 | 38386659 | 4.1962 | 7.1636  | -1.2147 |
| CEU | TBC1D3 | 38391659 | 4.1072 | 7.5047  | -1.333  |
| CEU | TBC1D3 | 38396659 | 3.3107 | 7.5047  | -1.6455 |
| CEU | TBC1D3 | 38401659 | 1.8454 | 6.3108  | -2.0502 |
| CEU | TBC1D3 | 38406659 | 2.4022 | 5.458   | -1.5975 |
| CEU | TBC1D3 | 38411659 | 3.4174 | 7.5047  | -1.6037 |
| CEU | TBC1D3 | 38416659 | 3.8567 | 7.8459  | -1.5028 |
| CEU | TBC1D3 | 38421659 | 4.0633 | 7.5047  | -1.3502 |
| CEU | TBC1D3 | 38426659 | 3.9025 | 7.3342  | -1.375  |
| CEU | TBC1D3 | 38431659 | 3.8895 | 5.7991  | -0.9458 |
| CEU | TBC1D3 | 38436659 | 3.1197 | 4.6052  | -0.9019 |
| CEU | TBC1D3 | 38441659 | 2.1324 | 4.6052  | -1.5013 |
| CEU | TBC1D3 | 38446659 | 1.328  | 4.7757  | -2.0277 |
| CEU | TBC1D3 | 38451659 | 0.9021 | 4.6052  | -2.2483 |
| CEU | TBC1D3 | 38456659 | 1.2896 | 4.4346  | -1.9733 |
| CEU | TBC1D3 | 38461659 | 1.6726 | 4.7757  | -1.8251 |
| CEU | TBC1D3 | 38466659 | 2.41   | 4.9463  | -1.4464 |
| CEU | TBC1D3 | 38471659 | 1.7363 | 3.9229  | -1.5251 |
| CEU | TBC1D3 | 38476659 | 1.2745 | 4.0935  | -1.8956 |
| CEU | TBC1D3 | 38481659 | 1.795  | 4.4346  | -1.6562 |
| CEU | TBC1D3 | 38486659 | 1.4395 | 3.9229  | -1.7321 |

## 2\_TajimasD\_data

|     |        |          |         |         |         |
|-----|--------|----------|---------|---------|---------|
| CEU | TBC1D3 | 38491659 | 1.8864  | 4.0935  | -1.4841 |
| CEU | TBC1D3 | 38496659 | 1.9198  | 4.2641  | -1.5218 |
| CEU | TBC1D3 | 38501659 | 1.7827  | 3.9229  | -1.4927 |
| CEU | TBC1D3 | 38506659 | 1.5417  | 4.4346  | -1.8151 |
| CEU | TBC1D3 | 38511659 | 0.7493  | 4.0935  | -2.2487 |
| CEU | TBC1D3 | 38516659 | 1.0872  | 4.9463  | -2.2008 |
| CEU | TBC1D3 | 38521659 | 1.7774  | 5.7991  | -1.9919 |
| CEU | TBC1D3 | 38526659 | 1.5972  | 5.1169  | -1.9482 |
| CEU | TBC1D3 | 38531659 | 4.0008  | 11.4277 | -1.9732 |
| CEU | TBC1D3 | 38536659 | 4.9825  | 13.1333 | -1.8992 |
| CEU | TBC1D3 | 38541659 | 2.9499  | 7.5047  | -1.7871 |
| CEU | TBC1D3 | 38546659 | 2.3676  | 5.7991  | -1.6996 |
| CEU | TBC1D3 | 38551659 | 2.6747  | 5.6286  | -1.5025 |
| CEU | TBC1D3 | 38556659 | 2.9262  | 5.7991  | -1.4229 |
| CEU | TBC1D3 | 38561659 | 1.927   | 5.1169  | -1.7657 |
| CEU | TBC1D3 | 38566659 | 1.4974  | 5.2874  | -2.0379 |
| CEU | TBC1D3 | 38571659 | 2.0054  | 4.4346  | -1.5242 |
| CEU | TBC1D3 | 38576659 | 3.918   | 5.2874  | -0.7363 |
| CEU | TBC1D3 | 38581659 | 4.6716  | 8.5281  | -1.3456 |
| CEU | TBC1D3 | 38586659 | 6.094   | 9.0398  | -0.9739 |
| CEU | TBC1D3 | 38591659 | 8.4923  | 7.6753  | 0.314   |
| CEU | TBC1D3 | 38596659 | 7.0849  | 6.1402  | 0.4445  |
| CEU | TBC1D3 | 38601659 | 4.7196  | 5.7991  | -0.5347 |
| CEU | TBC1D3 | 38606659 | 4.1342  | 7.5047  | -1.3224 |
| CEU | TBC1D3 | 38611659 | 3.0674  | 6.8225  | -1.6068 |
| CEU | TBC1D3 | 38616659 | 3.9602  | 6.6519  | -1.1785 |
| CEU | TBC1D3 | 38621659 | 4.7262  | 6.3108  | -0.7275 |
| CEU | TBC1D3 | 38626659 | 6.0313  | 7.1636  | -0.4635 |
| CEU | TBC1D3 | 38631659 | 7.7069  | 9.7221  | -0.6228 |
| CEU | TBC1D3 | 38636659 | 10.0794 | 10.2337 | -0.0455 |
| CEU | TBC1D3 | 38641659 | 10.3647 | 8.6987  | 0.5708  |
| CEU | TBC1D3 | 38646659 | 8.1033  | 7.3342  | 0.3082  |
| CEU | TBC1D3 | 38651659 | 5.6531  | 7.6753  | -0.7773 |
| CEU | TBC1D3 | 38656659 | 2.9744  | 6.8225  | -1.6466 |
| CEU | TBC1D3 | 38661659 | 5.9924  | 6.6519  | -0.2887 |
| CEU | TBC1D3 | 38666659 | 4.9085  | 7.5047  | -1.0186 |
| CEU | TBC1D3 | 38671659 | 2.3638  | 10.4043 | -2.3325 |
| CEU | TBC1D3 | 38676659 | 2.5022  | 9.2104  | -2.1798 |
| CEU | TBC1D3 | 38681659 | 1.4811  | 5.458   | -2.079  |
| CEU | TBC1D3 | 38686659 | 1.1196  | 4.6052  | -2.1163 |
| CHB | TBC1D3 | 37686659 | 3.6396  | 6.0989  | -1.1609 |
| CHB | TBC1D3 | 37691659 | 2.5254  | 4.4048  | -1.1826 |
| CHB | TBC1D3 | 37696659 | 6.5625  | 7.1154  | -0.2271 |
| CHB | TBC1D3 | 37701659 | 8.1894  | 7.6237  | 0.2181  |
| CHB | TBC1D3 | 37706659 | 6.7202  | 5.7601  | 0.477   |
| CHB | TBC1D3 | 37711659 | 5.1778  | 5.9295  | -0.3639 |
| CHB | TBC1D3 | 37716659 | 3.7211  | 6.4378  | -1.2215 |
| CHB | TBC1D3 | 37721659 | 4.1355  | 6.6072  | -1.0856 |
| CHB | TBC1D3 | 37726659 | 3.7935  | 7.2848  | -1.4034 |

## 2\_TajimasD\_data

|     |        |          |         |         |         |
|-----|--------|----------|---------|---------|---------|
| CHB | TBC1D3 | 37731659 | 3.0919  | 8.4708  | -1.883  |
| CHB | TBC1D3 | 37736659 | 4.6122  | 9.4872  | -1.5367 |
| CHB | TBC1D3 | 37741659 | 8.1597  | 9.3178  | -0.3712 |
| CHB | TBC1D3 | 37746659 | 6.8091  | 8.6402  | -0.6294 |
| CHB | TBC1D3 | 37751659 | 2.0929  | 7.1154  | -2.0626 |
| CHB | TBC1D3 | 37756659 | 1.0584  | 4.7436  | -2.1738 |
| CHB | TBC1D3 | 37761659 | 1.0967  | 3.7271  | -1.9109 |
| CHB | TBC1D3 | 37766659 | 2.194   | 5.5907  | -1.7331 |
| CHB | TBC1D3 | 37771659 | 3.8035  | 7.9625  | -1.5412 |
| CHB | TBC1D3 | 37776659 | 3.3194  | 7.2848  | -1.594  |
| CHB | TBC1D3 | 37781659 | 4.3785  | 7.6237  | -1.2514 |
| CHB | TBC1D3 | 37786659 | 6.0493  | 8.4708  | -0.8477 |
| CHB | TBC1D3 | 37791659 | 4.3796  | 7.6237  | -1.251  |
| CHB | TBC1D3 | 37796659 | 1.8641  | 6.946   | -2.1332 |
| CHB | TBC1D3 | 37801659 | 1.072   | 6.7766  | -2.4488 |
| CHB | TBC1D3 | 37806659 | 1.8342  | 6.7766  | -2.1216 |
| CHB | TBC1D3 | 37811659 | 3.6265  | 6.2684  | -1.2168 |
| CHB | TBC1D3 | 37816659 | 3.6627  | 7.1154  | -1.4179 |
| CHB | TBC1D3 | 37821659 | 3.3409  | 8.3013  | -1.7691 |
| CHB | TBC1D3 | 37826659 | 9.8675  | 9.8261  | 0.0126  |
| CHB | TBC1D3 | 37831659 | 21.0238 | 12.0285 | 2.2708  |
| CHB | TBC1D3 | 37836659 | 15.7761 | 9.3178  | 2.0701  |
| CHB | TBC1D3 | 37841659 | 5.6269  | 6.4378  | -0.3646 |
| CHB | TBC1D3 | 37846659 | 5.7683  | 6.4378  | -0.301  |
| CHB | TBC1D3 | 37851659 | 5.3408  | 6.6072  | -0.5562 |
| CHB | TBC1D3 | 37856659 | 3.3792  | 6.0989  | -1.2838 |
| CHB | TBC1D3 | 37861659 | 2.0048  | 5.4213  | -1.7915 |
| CHB | TBC1D3 | 37866659 | 2.8089  | 5.4213  | -1.3699 |
| CHB | TBC1D3 | 37871659 | 1.9792  | 5.4213  | -1.8049 |
| CHB | TBC1D3 | 37876659 | 3.8487  | 6.6072  | -1.2116 |
| CHB | TBC1D3 | 37881659 | 4.1932  | 6.4378  | -1.0092 |
| CHB | TBC1D3 | 37886659 | 1.7108  | 4.913   | -1.8316 |
| CHB | TBC1D3 | 37891659 | 1.7544  | 4.5742  | -1.717  |
| CHB | TBC1D3 | 37896659 | 1.3789  | 6.7766  | -2.317  |
| CHB | TBC1D3 | 37901659 | 3.1743  | 9.9955  | -2.0483 |
| CHB | TBC1D3 | 37906659 | 3.9001  | 9.8261  | -1.808  |
| CHB | TBC1D3 | 37911659 | 2.4601  | 6.4378  | -1.7885 |
| CHB | TBC1D3 | 37916659 | 1.4536  | 4.913   | -1.9788 |
| CHB | TBC1D3 | 37921659 | 1.541   | 4.7436  | -1.8891 |
| CHB | TBC1D3 | 37926659 | 2.5593  | 5.4213  | -1.5007 |
| CHB | TBC1D3 | 37931659 | 1.656   | 5.5907  | -2.0076 |
| CHB | TBC1D3 | 37936659 | 2.674   | 6.4378  | -1.6923 |
| CHB | TBC1D3 | 37941659 | 2.8482  | 8.3013  | -1.9448 |
| CHB | TBC1D3 | 37946659 | 0.846   | 7.4543  | -2.6012 |
| CHB | TBC1D3 | 37951659 | 1.2046  | 8.8096  | -2.5677 |
| CHB | TBC1D3 | 37956659 | 2.308   | 8.1319  | -2.1168 |
| CHB | TBC1D3 | 37961659 | 2.4803  | 7.1154  | -1.9035 |
| CHB | TBC1D3 | 37966659 | 2.2058  | 8.979   | -2.2469 |
| CHB | TBC1D3 | 37971659 | 2.8806  | 7.1154  | -1.7391 |



## 2\_TajimasD\_data

|     |        |          |         |         |         |
|-----|--------|----------|---------|---------|---------|
| CHB | TBC1D3 | 37976659 | 2.3619  | 7.2848  | -1.9788 |
| CHB | TBC1D3 | 37981659 | 2.4011  | 10.5037 | -2.323  |
| CHB | TBC1D3 | 37986659 | 2.1523  | 9.6567  | -2.327  |
| CHB | TBC1D3 | 37991659 | 1.245   | 7.1154  | -2.4108 |
| CHB | TBC1D3 | 37996659 | 1.2027  | 5.9295  | -2.2883 |
| CHB | TBC1D3 | 38001659 | 2.9109  | 7.4543  | -1.7884 |
| CHB | TBC1D3 | 38006659 | 4.7809  | 10.8426 | -1.687  |
| CHB | TBC1D3 | 38011659 | 3.0693  | 11.3508 | -2.2079 |
| CHB | TBC1D3 | 38016659 | 2.5717  | 9.4872  | -2.1799 |
| CHB | TBC1D3 | 38021659 | 6.6254  | 9.1484  | -0.8226 |
| CHB | TBC1D3 | 38026659 | 8.9016  | 8.4708  | 0.1508  |
| CHB | TBC1D3 | 38031659 | 12.2827 | 8.4708  | 1.3344  |
| CHB | TBC1D3 | 38036659 | 12.4839 | 7.4543  | 1.9798  |
| CHB | TBC1D3 | 38041659 | 6.9832  | 5.7601  | 0.6077  |
| CHB | TBC1D3 | 38046659 | 5.6672  | 5.7601  | -0.0462 |
| CHB | TBC1D3 | 38051659 | 5.2536  | 5.9295  | -0.3272 |
| CHB | TBC1D3 | 38056659 | 4.8812  | 6.4378  | -0.6999 |
| CHB | TBC1D3 | 38061659 | 10.2812 | 7.9625  | 0.8592  |
| CHB | TBC1D3 | 38066659 | 14.4936 | 10.6731 | 1.0791  |
| CHB | TBC1D3 | 38071659 | 15.2399 | 11.5202 | 0.978   |
| CHB | TBC1D3 | 38076659 | 9.6195  | 7.6237  | 0.7696  |
| CHB | TBC1D3 | 38081659 | 4.4679  | 6.6072  | -0.9396 |
| CHB | TBC1D3 | 38086659 | 7.8369  | 8.979   | -0.3789 |
| CHB | TBC1D3 | 38091659 | 9.596   | 9.1484  | 0.1459  |
| CHB | TBC1D3 | 38096659 | 9.3864  | 9.4872  | -0.0318 |
| CHB | TBC1D3 | 38101659 | 9.4911  | 8.6402  | 0.2925  |
| CHB | TBC1D3 | 38106659 | 14.5098 | 9.3178  | 1.6642  |
| CHB | TBC1D3 | 38111659 | 27.032  | 14.5697 | 2.624   |
| CHB | TBC1D3 | 38116659 | 25.4278 | 16.0944 | 1.7873  |
| CHB | TBC1D3 | 38121659 | 15.6471 | 12.8755 | 0.6562  |
| CHB | TBC1D3 | 38126659 | 15.7215 | 11.3508 | 1.1652  |
| CHB | TBC1D3 | 38131659 | 11.3777 | 8.3013  | 1.0972  |
| CHB | TBC1D3 | 38136659 | 8.462   | 7.9625  | 0.1851  |
| CHB | TBC1D3 | 38141659 | 14.0366 | 11.6896 | 0.6087  |
| CHB | TBC1D3 | 38146659 | 18.8549 | 12.8755 | 1.4156  |
| CHB | TBC1D3 | 38151659 | 14.5026 | 10.3343 | 1.2133  |
| CHB | TBC1D3 | 38156659 | 12.4586 | 9.8261  | 0.8032  |
| CHB | TBC1D3 | 38161659 | 19.0153 | 11.8591 | 1.8309  |
| CHB | TBC1D3 | 38166659 | 19.6923 | 14.4003 | 1.1267  |
| CHB | TBC1D3 | 38171659 | 15.0503 | 13.2144 | 0.4241  |
| CHB | TBC1D3 | 38176659 | 13.3276 | 9.3178  | 1.2853  |
| CHB | TBC1D3 | 38181659 | 10.5047 | 7.1154  | 1.3919  |
| CHB | TBC1D3 | 38186659 | 7.9667  | 5.9295  | 0.9862  |
| CHB | TBC1D3 | 38191659 | 8.3861  | 8.3013  | 0.0302  |
| CHB | TBC1D3 | 38196659 | 6.2039  | 9.9955  | -1.1385 |
| CHB | TBC1D3 | 38201659 | 5.3552  | 8.8096  | -1.1663 |
| CHB | TBC1D3 | 38206659 | 4.7579  | 7.2848  | -1.0157 |
| CHB | TBC1D3 | 38211659 | 9.1399  | 6.6072  | 1.1124  |
| CHB | TBC1D3 | 38216659 | 12.0331 | 6.4378  | 2.5158  |

## 2\_TajimasD\_data

|     |        |          |        |        |         |
|-----|--------|----------|--------|--------|---------|
| CHB | TBC1D3 | 38221659 | 8.6988 | 6.7766 | 0.8251  |
| CHB | TBC1D3 | 38226659 | 5.7261 | 5.9295 | -0.0985 |
| CHB | TBC1D3 | 38231659 | 1.9153 | 4.2354 | -1.5104 |
| CHB | TBC1D3 | 38236659 | 1.7367 | 5.5907 | -1.9664 |
| CHB | TBC1D3 | 38241659 | 3.5443 | 8.3013 | -1.6966 |
| CHB | TBC1D3 | 38246659 | 4.562  | 7.6237 | -1.1807 |
| CHB | TBC1D3 | 38251659 | 6.9539 | 5.7601 | 0.5931  |
| CHB | TBC1D3 | 38256659 | 7.541  | 6.6072 | 0.4101  |
| CHB | TBC1D3 | 38261659 | 3.7093 | 6.6072 | -1.2728 |
| CHB | TBC1D3 | 38266659 | 2.3038 | 5.4213 | -1.6347 |
| CHB | TBC1D3 | 38271659 | 3.2482 | 6.6072 | -1.4753 |
| CHB | TBC1D3 | 38276659 | 2.4333 | 7.1154 | -1.9228 |
| CHB | TBC1D3 | 38281659 | 1.4455 | 5.7601 | -2.1436 |
| CHB | TBC1D3 | 38286659 | 1.9294 | 6.0989 | -1.9682 |
| CHB | TBC1D3 | 38291659 | 1.1837 | 5.4213 | -2.2221 |
| CHB | TBC1D3 | 38296659 | 0.5068 | 3.7271 | -2.3395 |
| CHB | TBC1D3 | 38301659 | 0.8053 | 3.5577 | -2.0801 |
| CHB | TBC1D3 | 38306659 | 1.1515 | 4.7436 | -2.1189 |
| CHB | TBC1D3 | 38311659 | 1.1268 | 5.9295 | -2.3251 |
| CHB | TBC1D3 | 38316659 | 1.1753 | 5.5907 | -2.2528 |
| CHB | TBC1D3 | 38321659 | 1.2673 | 5.2519 | -2.149  |
| CHB | TBC1D3 | 38326659 | 0.9094 | 6.0989 | -2.4497 |
| CHB | TBC1D3 | 38331659 | 0.4807 | 5.5907 | -2.6072 |
| CHB | TBC1D3 | 38336659 | 0.8549 | 4.5742 | -2.2648 |
| CHB | TBC1D3 | 38341659 | 1.8148 | 6.0989 | -2.0223 |
| CHB | TBC1D3 | 38346659 | 3.2633 | 6.946  | -1.5459 |
| CHB | TBC1D3 | 38351659 | 4.4154 | 6.7766 | -1.0136 |
| CHB | TBC1D3 | 38356659 | 7.5658 | 7.4543 | 0.0439  |
| CHB | TBC1D3 | 38361659 | 9.0312 | 7.2848 | 0.702   |
| CHB | TBC1D3 | 38366659 | 6.6796 | 6.946  | -0.1118 |
| CHB | TBC1D3 | 38371659 | 6.1925 | 6.2684 | -0.035  |
| CHB | TBC1D3 | 38376659 | 7.0375 | 7.1154 | -0.032  |
| CHB | TBC1D3 | 38381659 | 7.3916 | 7.4543 | -0.0247 |
| CHB | TBC1D3 | 38386659 | 6.9336 | 6.2684 | 0.3064  |
| CHB | TBC1D3 | 38391659 | 5.739  | 7.1154 | -0.5652 |
| CHB | TBC1D3 | 38396659 | 3.803  | 6.4378 | -1.1847 |
| CHB | TBC1D3 | 38401659 | 2.783  | 4.7436 | -1.1565 |
| CHB | TBC1D3 | 38406659 | 3.3594 | 5.7601 | -1.1927 |
| CHB | TBC1D3 | 38411659 | 4.162  | 6.7766 | -1.1224 |
| CHB | TBC1D3 | 38416659 | 5.3409 | 6.7766 | -0.6163 |
| CHB | TBC1D3 | 38421659 | 6.3864 | 6.0989 | 0.1357  |
| CHB | TBC1D3 | 38426659 | 6.4514 | 5.2519 | 0.6469  |
| CHB | TBC1D3 | 38431659 | 5.0651 | 5.2519 | -0.1007 |
| CHB | TBC1D3 | 38436659 | 3.7426 | 5.2519 | -0.814  |
| CHB | TBC1D3 | 38441659 | 3.2852 | 4.4048 | -0.7045 |
| CHB | TBC1D3 | 38446659 | 1.9178 | 2.8801 | -0.8676 |
| CHB | TBC1D3 | 38451659 | 1.0343 | 2.033  | -1.191  |
| CHB | TBC1D3 | 38456659 | 2.4243 | 3.2189 | -0.6533 |
| CHB | TBC1D3 | 38461659 | 2.7872 | 5.5907 | -1.4304 |

## 2\_TajimasD\_data

|     |        |          |         |         |         |
|-----|--------|----------|---------|---------|---------|
| CHB | TBC1D3 | 38466659 | 2.2294  | 5.0825  | -1.584  |
| CHB | TBC1D3 | 38471659 | 1.8574  | 4.2354  | -1.5481 |
| CHB | TBC1D3 | 38476659 | 2.1595  | 4.7436  | -1.5243 |
| CHB | TBC1D3 | 38481659 | 2.7942  | 4.7436  | -1.1499 |
| CHB | TBC1D3 | 38486659 | 1.7864  | 4.2354  | -1.5943 |
| CHB | TBC1D3 | 38491659 | 2.151   | 4.2354  | -1.3569 |
| CHB | TBC1D3 | 38496659 | 2.9707  | 4.066   | -0.7386 |
| CHB | TBC1D3 | 38501659 | 2.2522  | 3.8965  | -1.1501 |
| CHB | TBC1D3 | 38506659 | 1.1049  | 5.9295  | -2.3357 |
| CHB | TBC1D3 | 38511659 | 0.5119  | 5.5907  | -2.5913 |
| CHB | TBC1D3 | 38516659 | 0.9661  | 4.5742  | -2.197  |
| CHB | TBC1D3 | 38521659 | 1.3059  | 4.5742  | -1.9901 |
| CHB | TBC1D3 | 38526659 | 0.9853  | 3.2189  | -1.8363 |
| CHB | TBC1D3 | 38531659 | 2.7419  | 6.4378  | -1.6618 |
| CHB | TBC1D3 | 38536659 | 3.8862  | 7.7931  | -1.4766 |
| CHB | TBC1D3 | 38541659 | 2.1799  | 4.4048  | -1.4    |
| CHB | TBC1D3 | 38546659 | 1.4759  | 2.3718  | -0.9457 |
| CHB | TBC1D3 | 38551659 | 2.3331  | 2.7106  | -0.3577 |
| CHB | TBC1D3 | 38556659 | 2.5721  | 3.3883  | -0.6428 |
| CHB | TBC1D3 | 38561659 | 1.6453  | 2.5412  | -0.8946 |
| CHB | TBC1D3 | 38566659 | 1.0512  | 2.8801  | -1.649  |
| CHB | TBC1D3 | 38571659 | 1.7807  | 2.5412  | -0.7594 |
| CHB | TBC1D3 | 38576659 | 3.8102  | 3.5577  | 0.1908  |
| CHB | TBC1D3 | 38581659 | 4.7836  | 6.4378  | -0.7438 |
| CHB | TBC1D3 | 38586659 | 6.5849  | 7.4543  | -0.3422 |
| CHB | TBC1D3 | 38591659 | 9.2638  | 8.4708  | 0.2776  |
| CHB | TBC1D3 | 38596659 | 7.7759  | 7.6237  | 0.0587  |
| CHB | TBC1D3 | 38601659 | 4.3111  | 5.4213  | -0.5822 |
| CHB | TBC1D3 | 38606659 | 3.1824  | 4.4048  | -0.7692 |
| CHB | TBC1D3 | 38611659 | 2.2871  | 3.7271  | -1.0461 |
| CHB | TBC1D3 | 38616659 | 2.649   | 5.4213  | -1.4537 |
| CHB | TBC1D3 | 38621659 | 3.2387  | 6.946   | -1.5562 |
| CHB | TBC1D3 | 38626659 | 3.7173  | 7.9625  | -1.5731 |
| CHB | TBC1D3 | 38631659 | 3.6872  | 9.8261  | -1.873  |
| CHB | TBC1D3 | 38636659 | 6.8346  | 10.8426 | -1.1154 |
| CHB | TBC1D3 | 38641659 | 9.3229  | 8.8096  | 0.1733  |
| CHB | TBC1D3 | 38646659 | 8.1479  | 7.6237  | 0.2021  |
| CHB | TBC1D3 | 38651659 | 5.415   | 7.6237  | -0.8517 |
| CHB | TBC1D3 | 38656659 | 2.2644  | 7.6237  | -2.0667 |
| CHB | TBC1D3 | 38661659 | 5.8422  | 8.6402  | -0.9618 |
| CHB | TBC1D3 | 38666659 | 5.4106  | 9.9955  | -1.3768 |
| CHB | TBC1D3 | 38671659 | 2.9172  | 12.1979 | -2.3122 |
| CHB | TBC1D3 | 38676659 | 2.4186  | 9.1484  | -2.1942 |
| CHB | TBC1D3 | 38681659 | 0.7445  | 5.7601  | -2.4919 |
| CHB | TBC1D3 | 38686659 | 1.1915  | 8.3013  | -2.5357 |
| YRI | TBC1D3 | 37686659 | 6.7408  | 8.4031  | -0.5842 |
| YRI | TBC1D3 | 37691659 | 5.038   | 6.8906  | -0.7806 |
| YRI | TBC1D3 | 37696659 | 9.4052  | 8.7392  | 0.2258  |
| YRI | TBC1D3 | 37701659 | 10.3195 | 10.0837 | 0.07    |

## 2\_TajimasD\_data

|     |        |          |         |         |         |
|-----|--------|----------|---------|---------|---------|
| YRI | TBC1D3 | 37706659 | 8.4933  | 8.9073  | -0.1379 |
| YRI | TBC1D3 | 37711659 | 6.7731  | 8.235   | -0.5234 |
| YRI | TBC1D3 | 37716659 | 6.7957  | 9.5795  | -0.8667 |
| YRI | TBC1D3 | 37721659 | 7.6097  | 10.0837 | -0.7343 |
| YRI | TBC1D3 | 37726659 | 7.3738  | 8.9073  | -0.5107 |
| YRI | TBC1D3 | 37731659 | 6.2057  | 9.0754  | -0.9394 |
| YRI | TBC1D3 | 37736659 | 7.5285  | 11.2602 | -0.999  |
| YRI | TBC1D3 | 37741659 | 11.865  | 13.445  | -0.3578 |
| YRI | TBC1D3 | 37746659 | 13.2692 | 12.6047 | 0.16    |
| YRI | TBC1D3 | 37751659 | 9.8958  | 10.924  | -0.2832 |
| YRI | TBC1D3 | 37756659 | 6.0252  | 10.5879 | -1.294  |
| YRI | TBC1D3 | 37761659 | 4.5632  | 8.9073  | -1.4468 |
| YRI | TBC1D3 | 37766659 | 5.9682  | 9.7476  | -1.1578 |
| YRI | TBC1D3 | 37771659 | 8.8644  | 11.5963 | -0.7114 |
| YRI | TBC1D3 | 37776659 | 8.0558  | 10.756  | -0.7546 |
| YRI | TBC1D3 | 37781659 | 8.9217  | 11.2602 | -0.626  |
| YRI | TBC1D3 | 37786659 | 9.5896  | 12.1005 | -0.6282 |
| YRI | TBC1D3 | 37791659 | 7.7756  | 10.756  | -0.8329 |
| YRI | TBC1D3 | 37796659 | 7.1787  | 9.2434  | -0.6645 |
| YRI | TBC1D3 | 37801659 | 6.3872  | 9.9157  | -1.0638 |
| YRI | TBC1D3 | 37806659 | 6.5228  | 11.0921 | -1.2406 |
| YRI | TBC1D3 | 37811659 | 6.4071  | 12.7727 | -1.5133 |
| YRI | TBC1D3 | 37816659 | 6.6814  | 14.9575 | -1.6938 |
| YRI | TBC1D3 | 37821659 | 7.0582  | 13.2769 | -1.4252 |
| YRI | TBC1D3 | 37826659 | 9.975   | 11.2602 | -0.3441 |
| YRI | TBC1D3 | 37831659 | 18.5872 | 13.1089 | 1.2708  |
| YRI | TBC1D3 | 37836659 | 14.6723 | 10.924  | 1.0324  |
| YRI | TBC1D3 | 37841659 | 6.1672  | 8.9073  | -0.9126 |
| YRI | TBC1D3 | 37846659 | 7.3901  | 10.2518 | -0.8364 |
| YRI | TBC1D3 | 37851659 | 7.382   | 9.4115  | -0.6423 |
| YRI | TBC1D3 | 37856659 | 5.7007  | 7.8989  | -0.8178 |
| YRI | TBC1D3 | 37861659 | 5.0629  | 7.2267  | -0.8731 |
| YRI | TBC1D3 | 37866659 | 4.7677  | 7.2267  | -0.9923 |
| YRI | TBC1D3 | 37871659 | 3.8595  | 8.5712  | -1.626  |
| YRI | TBC1D3 | 37876659 | 5.3949  | 9.5795  | -1.3028 |
| YRI | TBC1D3 | 37881659 | 5.3765  | 10.0837 | -1.3972 |
| YRI | TBC1D3 | 37886659 | 3.5206  | 9.2434  | -1.8418 |
| YRI | TBC1D3 | 37891659 | 4.7169  | 8.4031  | -1.2956 |
| YRI | TBC1D3 | 37896659 | 5.0749  | 10.756  | -1.5876 |
| YRI | TBC1D3 | 37901659 | 8.9928  | 13.7811 | -1.0593 |
| YRI | TBC1D3 | 37906659 | 11.6224 | 13.7811 | -0.4776 |
| YRI | TBC1D3 | 37911659 | 7.177   | 10.5879 | -0.9673 |
| YRI | TBC1D3 | 37916659 | 5.7927  | 10.2518 | -1.3033 |
| YRI | TBC1D3 | 37921659 | 6.0376  | 10.4199 | -1.2615 |
| YRI | TBC1D3 | 37926659 | 8.2166  | 11.2602 | -0.8148 |
| YRI | TBC1D3 | 37931659 | 8.087   | 10.4199 | -0.6716 |
| YRI | TBC1D3 | 37936659 | 7.2094  | 8.9073  | -0.5655 |
| YRI | TBC1D3 | 37941659 | 9.0153  | 9.7476  | -0.2243 |
| YRI | TBC1D3 | 37946659 | 6.6415  | 8.7392  | -0.7111 |

## 2\_TajimasD\_data

|     |        |          |         |         |         |
|-----|--------|----------|---------|---------|---------|
| YRI | TBC1D3 | 37951659 | 8.5814  | 11.5963 | -0.7851 |
| YRI | TBC1D3 | 37956659 | 10.72   | 13.1089 | -0.5541 |
| YRI | TBC1D3 | 37961659 | 7.8139  | 11.0921 | -0.89   |
| YRI | TBC1D3 | 37966659 | 8.3278  | 10.756  | -0.6786 |
| YRI | TBC1D3 | 37971659 | 8.5774  | 10.0837 | -0.4471 |
| YRI | TBC1D3 | 37976659 | 8.1113  | 11.0921 | -0.8093 |
| YRI | TBC1D3 | 37981659 | 9.8561  | 12.6047 | -0.6617 |
| YRI | TBC1D3 | 37986659 | 8.9353  | 11.2602 | -0.6224 |
| YRI | TBC1D3 | 37991659 | 7.3351  | 10.924  | -0.9885 |
| YRI | TBC1D3 | 37996659 | 7.2172  | 10.0837 | -0.8508 |
| YRI | TBC1D3 | 38001659 | 9.3638  | 10.756  | -0.389  |
| YRI | TBC1D3 | 38006659 | 14.365  | 15.4617 | -0.2175 |
| YRI | TBC1D3 | 38011659 | 15.3319 | 16.9743 | -0.2979 |
| YRI | TBC1D3 | 38016659 | 11.4189 | 12.6047 | -0.2855 |
| YRI | TBC1D3 | 38021659 | 10.3642 | 10.756  | -0.1095 |
| YRI | TBC1D3 | 38026659 | 10.6222 | 11.7644 | -0.2934 |
| YRI | TBC1D3 | 38031659 | 11.8364 | 12.2685 | -0.1067 |
| YRI | TBC1D3 | 38036659 | 10.8628 | 10.924  | -0.0169 |
| YRI | TBC1D3 | 38041659 | 8.4136  | 9.5795  | -0.363  |
| YRI | TBC1D3 | 38046659 | 7.9883  | 8.4031  | -0.1458 |
| YRI | TBC1D3 | 38051659 | 7.7398  | 8.7392  | -0.3388 |
| YRI | TBC1D3 | 38056659 | 6.9147  | 10.756  | -1.0734 |
| YRI | TBC1D3 | 38061659 | 8.9798  | 12.4366 | -0.8428 |
| YRI | TBC1D3 | 38066659 | 12.1347 | 15.4617 | -0.6597 |
| YRI | TBC1D3 | 38071659 | 14.3471 | 17.1423 | -0.5022 |
| YRI | TBC1D3 | 38076659 | 10.8198 | 14.7895 | -0.8212 |
| YRI | TBC1D3 | 38081659 | 7.7043  | 11.5963 | -1.0135 |
| YRI | TBC1D3 | 38086659 | 10.2179 | 12.4366 | -0.5409 |
| YRI | TBC1D3 | 38091659 | 10.3228 | 13.1089 | -0.6463 |
| YRI | TBC1D3 | 38096659 | 10.8355 | 14.6214 | -0.7918 |
| YRI | TBC1D3 | 38101659 | 11.8069 | 17.4785 | -1.0002 |
| YRI | TBC1D3 | 38106659 | 14.3531 | 16.8062 | -0.4492 |
| YRI | TBC1D3 | 38111659 | 25.7555 | 17.9827 | 1.3339  |
| YRI | TBC1D3 | 38116659 | 26.3602 | 18.3188 | 1.3557  |
| YRI | TBC1D3 | 38121659 | 19.3262 | 16.8062 | 0.4614  |
| YRI | TBC1D3 | 38126659 | 19.8182 | 17.4785 | 0.4126  |
| YRI | TBC1D3 | 38131659 | 14.3308 | 15.1256 | -0.1609 |
| YRI | TBC1D3 | 38136659 | 10.9251 | 14.2853 | -0.7184 |
| YRI | TBC1D3 | 38141659 | 16.5941 | 16.9743 | -0.069  |
| YRI | TBC1D3 | 38146659 | 19.681  | 16.8062 | 0.5264  |
| YRI | TBC1D3 | 38151659 | 16.1387 | 14.4534 | 0.3563  |
| YRI | TBC1D3 | 38156659 | 15.5601 | 15.4617 | 0.0195  |
| YRI | TBC1D3 | 38161659 | 20.4817 | 18.991  | 0.2428  |
| YRI | TBC1D3 | 38166659 | 21.2331 | 21.512  | -0.0403 |
| YRI | TBC1D3 | 38171659 | 16.1084 | 20.3355 | -0.6445 |
| YRI | TBC1D3 | 38176659 | 13.0305 | 18.3188 | -0.8915 |
| YRI | TBC1D3 | 38181659 | 10.1172 | 16.302  | -1.166  |
| YRI | TBC1D3 | 38186659 | 8.0553  | 13.1089 | -1.1723 |
| YRI | TBC1D3 | 38191659 | 10.1979 | 14.2853 | -0.8739 |

## 2\_TajimasD\_data

|     |        |          |         |         |         |
|-----|--------|----------|---------|---------|---------|
| YRI | TBC1D3 | 38196659 | 12.7901 | 15.2937 | -0.5016 |
| YRI | TBC1D3 | 38201659 | 11.724  | 14.9575 | -0.6618 |
| YRI | TBC1D3 | 38206659 | 9.0758  | 12.9408 | -0.9076 |
| YRI | TBC1D3 | 38211659 | 10.8705 | 12.6047 | -0.4175 |
| YRI | TBC1D3 | 38216659 | 12.9311 | 13.2769 | -0.0793 |
| YRI | TBC1D3 | 38221659 | 12.7378 | 12.6047 | 0.032   |
| YRI | TBC1D3 | 38226659 | 9.9609  | 14.4534 | -0.9499 |
| YRI | TBC1D3 | 38231659 | 5.312   | 12.4366 | -1.737  |
| YRI | TBC1D3 | 38236659 | 4.7033  | 10.756  | -1.6914 |
| YRI | TBC1D3 | 38241659 | 7.479   | 11.0921 | -0.981  |
| YRI | TBC1D3 | 38246659 | 6.7426  | 9.2434  | -0.8048 |
| YRI | TBC1D3 | 38251659 | 6.5762  | 8.4031  | -0.6421 |
| YRI | TBC1D3 | 38256659 | 10.1867 | 11.0921 | -0.2458 |
| YRI | TBC1D3 | 38261659 | 7.5956  | 11.2602 | -0.981  |
| YRI | TBC1D3 | 38266659 | 3.9316  | 8.4031  | -1.5716 |
| YRI | TBC1D3 | 38271659 | 5.6109  | 9.2434  | -1.169  |
| YRI | TBC1D3 | 38276659 | 7.03    | 10.2518 | -0.9416 |
| YRI | TBC1D3 | 38281659 | 6.6892  | 10.756  | -1.1365 |
| YRI | TBC1D3 | 38286659 | 5.7955  | 9.9157  | -1.2422 |
| YRI | TBC1D3 | 38291659 | 4.5578  | 8.5712  | -1.385  |
| YRI | TBC1D3 | 38296659 | 5.8808  | 11.0921 | -1.4149 |
| YRI | TBC1D3 | 38301659 | 6.2964  | 12.2685 | -1.4748 |
| YRI | TBC1D3 | 38306659 | 6.4303  | 12.6047 | -1.4864 |
| YRI | TBC1D3 | 38311659 | 6.9423  | 13.445  | -1.4727 |
| YRI | TBC1D3 | 38316659 | 5.7091  | 11.5963 | -1.5331 |
| YRI | TBC1D3 | 38321659 | 4.9065  | 8.7392  | -1.2992 |
| YRI | TBC1D3 | 38326659 | 6.3768  | 10.0837 | -1.1003 |
| YRI | TBC1D3 | 38331659 | 6.0161  | 10.924  | -1.3517 |
| YRI | TBC1D3 | 38336659 | 6.0952  | 10.756  | -1.3024 |
| YRI | TBC1D3 | 38341659 | 7.0593  | 11.2602 | -1.1246 |
| YRI | TBC1D3 | 38346659 | 7.0364  | 9.5795  | -0.7917 |
| YRI | TBC1D3 | 38351659 | 8.653   | 10.5879 | -0.5487 |
| YRI | TBC1D3 | 38356659 | 11.1828 | 11.9324 | -0.19   |
| YRI | TBC1D3 | 38361659 | 12.0012 | 11.5963 | 0.1054  |
| YRI | TBC1D3 | 38366659 | 8.1391  | 10.924  | -0.767  |
| YRI | TBC1D3 | 38371659 | 5.8875  | 11.2602 | -1.4383 |
| YRI | TBC1D3 | 38376659 | 7.6436  | 12.6047 | -1.1943 |
| YRI | TBC1D3 | 38381659 | 7.0513  | 11.7644 | -1.2108 |
| YRI | TBC1D3 | 38386659 | 6.3236  | 10.5879 | -1.2093 |
| YRI | TBC1D3 | 38391659 | 5.3957  | 10.4199 | -1.4463 |
| YRI | TBC1D3 | 38396659 | 3.6217  | 9.5795  | -1.8549 |
| YRI | TBC1D3 | 38401659 | 4.3703  | 10.2518 | -1.719  |
| YRI | TBC1D3 | 38406659 | 4.6076  | 9.9157  | -1.6004 |
| YRI | TBC1D3 | 38411659 | 3.9842  | 7.7309  | -1.4216 |
| YRI | TBC1D3 | 38416659 | 4.835   | 8.9073  | -1.3563 |
| YRI | TBC1D3 | 38421659 | 5.5313  | 9.9157  | -1.3219 |
| YRI | TBC1D3 | 38426659 | 5.3471  | 8.235   | -1.034  |
| YRI | TBC1D3 | 38431659 | 4.9872  | 8.067   | -1.1238 |
| YRI | TBC1D3 | 38436659 | 4.8178  | 8.4031  | -1.2601 |

## 2\_TajimasD\_data

|     |        |          |         |         |         |
|-----|--------|----------|---------|---------|---------|
| YRI | TBC1D3 | 38441659 | 4.2014  | 7.3947  | -1.2618 |
| YRI | TBC1D3 | 38446659 | 3.2943  | 7.2267  | -1.5868 |
| YRI | TBC1D3 | 38451659 | 2.9737  | 7.0586  | -1.684  |
| YRI | TBC1D3 | 38456659 | 3.8655  | 7.2267  | -1.3563 |
| YRI | TBC1D3 | 38461659 | 4.5951  | 8.067   | -1.2669 |
| YRI | TBC1D3 | 38466659 | 5.7285  | 7.8989  | -0.8074 |
| YRI | TBC1D3 | 38471659 | 4.089   | 6.5544  | -1.0869 |
| YRI | TBC1D3 | 38476659 | 1.9401  | 6.8906  | -2.086  |
| YRI | TBC1D3 | 38481659 | 3.4418  | 7.3947  | -1.562  |
| YRI | TBC1D3 | 38486659 | 3.0341  | 7.0586  | -1.6591 |
| YRI | TBC1D3 | 38491659 | 2.8482  | 7.2267  | -1.7668 |
| YRI | TBC1D3 | 38496659 | 3.31    | 7.2267  | -1.5805 |
| YRI | TBC1D3 | 38501659 | 3.421   | 7.7309  | -1.6353 |
| YRI | TBC1D3 | 38506659 | 3.3663  | 8.5712  | -1.7962 |
| YRI | TBC1D3 | 38511659 | 3.1346  | 9.7476  | -2.0258 |
| YRI | TBC1D3 | 38516659 | 3.7817  | 9.7476  | -1.8276 |
| YRI | TBC1D3 | 38521659 | 3.9192  | 9.9157  | -1.808  |
| YRI | TBC1D3 | 38526659 | 3.5108  | 12.6047 | -2.1892 |
| YRI | TBC1D3 | 38531659 | 9.8422  | 20.6717 | -1.6252 |
| YRI | TBC1D3 | 38536659 | 10.9172 | 18.991  | -1.3148 |
| YRI | TBC1D3 | 38541659 | 4.4618  | 9.7476  | -1.6192 |
| YRI | TBC1D3 | 38546659 | 4.2635  | 10.2518 | -1.7502 |
| YRI | TBC1D3 | 38551659 | 4.9971  | 10.756  | -1.6093 |
| YRI | TBC1D3 | 38556659 | 4.146   | 9.4115  | -1.6665 |
| YRI | TBC1D3 | 38561659 | 2.9545  | 9.2434  | -2.0239 |
| YRI | TBC1D3 | 38566659 | 3.0778  | 8.235   | -1.8466 |
| YRI | TBC1D3 | 38571659 | 3.8594  | 8.067   | -1.5354 |
| YRI | TBC1D3 | 38576659 | 4.4494  | 9.9157  | -1.6481 |
| YRI | TBC1D3 | 38581659 | 5.9433  | 11.9324 | -1.5182 |
| YRI | TBC1D3 | 38586659 | 8.0945  | 14.1172 | -1.3023 |
| YRI | TBC1D3 | 38591659 | 10.4335 | 14.7895 | -0.9011 |
| YRI | TBC1D3 | 38596659 | 8.9292  | 12.1005 | -0.7934 |
| YRI | TBC1D3 | 38601659 | 4.796   | 9.7476  | -1.5169 |
| YRI | TBC1D3 | 38606659 | 4.5642  | 9.7476  | -1.5879 |
| YRI | TBC1D3 | 38611659 | 5.0033  | 10.4199 | -1.5593 |
| YRI | TBC1D3 | 38616659 | 6.7435  | 10.756  | -1.1213 |
| YRI | TBC1D3 | 38621659 | 6.1412  | 9.7476  | -1.1048 |
| YRI | TBC1D3 | 38626659 | 7.0385  | 10.756  | -1.0388 |
| YRI | TBC1D3 | 38631659 | 12.0222 | 12.4366 | -0.101  |
| YRI | TBC1D3 | 38636659 | 12.3555 | 12.6047 | -0.06   |
| YRI | TBC1D3 | 38641659 | 9.9534  | 12.4366 | -0.6054 |
| YRI | TBC1D3 | 38646659 | 11.6966 | 13.1089 | -0.3276 |
| YRI | TBC1D3 | 38651659 | 12.5485 | 11.7644 | 0.2014  |
| YRI | TBC1D3 | 38656659 | 8.4707  | 11.0921 | -0.7117 |
| YRI | TBC1D3 | 38661659 | 9.3235  | 12.6047 | -0.7899 |
| YRI | TBC1D3 | 38666659 | 13.8711 | 16.302  | -0.4583 |
| YRI | TBC1D3 | 38671659 | 11.7526 | 18.1507 | -1.0882 |
| YRI | TBC1D3 | 38676659 | 7.1648  | 13.9492 | -1.4837 |
| YRI | TBC1D3 | 38681659 | 5.6126  | 10.4199 | -1.3839 |

## 2\_TajimasD\_data

|     |         |          |         |         |         |
|-----|---------|----------|---------|---------|---------|
| YRI | TBC1D3  | 38686659 | 8.6352  | 12.2685 | -0.8972 |
| CEU | TP53TG3 | 31756603 | 6.7994  | 6.9931  | -0.081  |
| CEU | TP53TG3 | 31761603 | 5.3253  | 7.3342  | -0.8049 |
| CEU | TP53TG3 | 31766603 | 5.4805  | 6.6519  | -0.5129 |
| CEU | TP53TG3 | 31771603 | 12.1991 | 10.4043 | 0.5207  |
| CEU | TP53TG3 | 31776603 | 10.5341 | 9.8926  | 0.1951  |
| CEU | TP53TG3 | 31781603 | 4.7673  | 6.6519  | -0.8251 |
| CEU | TP53TG3 | 31786603 | 7.9118  | 7.8459  | 0.0248  |
| CEU | TP53TG3 | 31791603 | 6.685   | 6.6519  | 0.0145  |
| CEU | TP53TG3 | 31796603 | 5.0645  | 5.458   | -0.2057 |
| CEU | TP53TG3 | 31801603 | 4.7357  | 6.4814  | -0.7824 |
| CEU | TP53TG3 | 31806603 | 5.3937  | 7.8459  | -0.9238 |
| CEU | TP53TG3 | 31811603 | 10.0381 | 9.8926  | 0.0442  |
| CEU | TP53TG3 | 31816603 | 8.9     | 8.6987  | 0.069   |
| CEU | TP53TG3 | 31821603 | 5.0623  | 5.9697  | -0.4379 |
| CEU | TP53TG3 | 31826603 | 3.8186  | 5.458   | -0.857  |
| CEU | TP53TG3 | 31831603 | 7.0975  | 6.9931  | 0.0437  |
| CEU | TP53TG3 | 31836603 | 10.6257 | 10.2337 | 0.1155  |
| CEU | TP53TG3 | 31841603 | 7.1918  | 9.5515  | -0.7413 |
| CEU | TP53TG3 | 31846603 | 7.2861  | 9.0398  | -0.5798 |
| CEU | TP53TG3 | 31851603 | 8.1208  | 8.6987  | -0.198  |
| CEU | TP53TG3 | 31856603 | 5.8268  | 8.0164  | -0.8087 |
| CEU | TP53TG3 | 31861603 | 3.557   | 8.187   | -1.6774 |
| CEU | TP53TG3 | 31866603 | 1.7368  | 5.6286  | -1.9796 |
| CEU | TP53TG3 | 31871603 | 1.1534  | 3.2407  | -1.7115 |
| CEU | TP53TG3 | 31876603 | 0.5982  | 3.5818  | -2.2487 |
| CEU | TP53TG3 | 31881603 | 0.7908  | 4.4346  | -2.2862 |
| CEU | TP53TG3 | 31886603 | 0.9649  | 4.2641  | -2.1417 |
| CEU | TP53TG3 | 31891603 | 1.3846  | 4.7757  | -1.9944 |
| CEU | TP53TG3 | 31896603 | 1.4908  | 4.4346  | -1.847  |
| CEU | TP53TG3 | 31901603 | 1.5683  | 5.2874  | -1.9998 |
| CEU | TP53TG3 | 31906603 | 1.6753  | 6.8225  | -2.2025 |
| CEU | TP53TG3 | 31911603 | 2.0287  | 7.1636  | -2.102  |
| CEU | TP53TG3 | 31916603 | 1.7603  | 6.4814  | -2.1161 |
| CEU | TP53TG3 | 31921603 | 1.126   | 4.9463  | -2.1787 |
| CEU | TP53TG3 | 31926603 | 1.2892  | 4.0935  | -1.8857 |
| CEU | TP53TG3 | 31931603 | 1.4463  | 5.1169  | -2.0317 |
| CEU | TP53TG3 | 31936603 | 2.0041  | 6.8225  | -2.0618 |
| CEU | TP53TG3 | 31941603 | 2.4539  | 6.4814  | -1.8052 |
| CEU | TP53TG3 | 31946603 | 2.538   | 6.8225  | -1.8333 |
| CEU | TP53TG3 | 31951603 | 2.1851  | 6.8225  | -1.9843 |
| CEU | TP53TG3 | 31956603 | 1.7382  | 4.7757  | -1.7865 |
| CEU | TP53TG3 | 31961603 | 1.074   | 3.2407  | -1.7766 |
| CEU | TP53TG3 | 31966603 | 1.9856  | 3.9229  | -1.3512 |
| CEU | TP53TG3 | 31971603 | 3.5259  | 5.1169  | -0.8806 |
| CEU | TP53TG3 | 31976603 | 4.0598  | 5.458   | -0.7309 |
| CEU | TP53TG3 | 31981603 | 3.1284  | 4.7757  | -0.9688 |
| CEU | TP53TG3 | 31986603 | 2.6034  | 6.3108  | -1.7021 |
| CEU | TP53TG3 | 31991603 | 4.1198  | 9.0398  | -1.6267 |



## 2\_TajimasD\_data

|     |         |          |        |        |         |
|-----|---------|----------|--------|--------|---------|
| CEU | TP53TG3 | 31996603 | 3.2445 | 6.6519 | -1.4918 |
| CEU | TP53TG3 | 32001603 | 2.1802 | 4.9463 | -1.5775 |
| CEU | TP53TG3 | 32006603 | 1.6296 | 4.4346 | -1.76   |
| CEU | TP53TG3 | 32011603 | 2.0421 | 6.4814 | -1.9898 |
| CEU | TP53TG3 | 32016603 | 3.0311 | 8.3576 | -1.8934 |
| CEU | TP53TG3 | 32021603 | 2.4886 | 7.3342 | -1.9415 |
| CEU | TP53TG3 | 32026603 | 3.1913 | 8.5281 | -1.8621 |
| CEU | TP53TG3 | 32031603 | 3.8071 | 8.0164 | -1.5547 |
| CEU | TP53TG3 | 32036603 | 2.6891 | 6.3108 | -1.6628 |
| CEU | TP53TG3 | 32041603 | 1.6186 | 3.4112 | -1.4079 |
| CEU | TP53TG3 | 32046603 | 2.2643 | 2.5584 | -0.293  |
| CEU | TP53TG3 | 32051603 | 2.4902 | 4.4346 | -1.22   |
| CEU | TP53TG3 | 32056603 | 1.6673 | 3.7524 | -1.5106 |
| CEU | TP53TG3 | 32061603 | 0.8877 | 2.2173 | -1.4854 |
| CEU | TP53TG3 | 32066603 | 0.9575 | 3.2407 | -1.8722 |
| CEU | TP53TG3 | 32071603 | 0.9775 | 3.2407 | -1.8558 |
| CEU | TP53TG3 | 32076603 | 0.9487 | 2.2173 | -1.4173 |
| CEU | TP53TG3 | 32081603 | 1.5214 | 2.8996 | -1.2395 |
| CEU | TP53TG3 | 32086603 | 1.6802 | 3.7524 | -1.5013 |
| CEU | TP53TG3 | 32091603 | 2.6592 | 4.4346 | -1.1139 |
| CEU | TP53TG3 | 32096603 | 2.7087 | 4.0935 | -0.9312 |
| CEU | TP53TG3 | 32101603 | 1.1653 | 2.2173 | -1.1753 |
| CEU | TP53TG3 | 32106603 | 1.9746 | 3.0701 | -0.9397 |
| CEU | TP53TG3 | 32111603 | 2.174  | 4.6052 | -1.4761 |
| CEU | TP53TG3 | 32116603 | 1.3517 | 3.2407 | -1.5489 |
| CEU | TP53TG3 | 32121603 | 1.5048 | 3.7524 | -1.6283 |
| CEU | TP53TG3 | 32126603 | 0.9264 | 4.9463 | -2.2925 |
| CEU | TP53TG3 | 32131603 | 1.4094 | 6.1402 | -2.2262 |
| CEU | TP53TG3 | 32136603 | 1.9344 | 5.9697 | -1.9475 |
| CEU | TP53TG3 | 32141603 | 1.6933 | 4.6052 | -1.7679 |
| CEU | TP53TG3 | 32146603 | 0.8623 | 3.0701 | -1.8938 |
| CEU | TP53TG3 | 32151603 | 0.3682 | 2.0467 | -1.9972 |
| CEU | TP53TG3 | 32156603 | 0.8268 | 2.3879 | -1.644  |
| CEU | TP53TG3 | 32161603 | 1.9882 | 3.5818 | -1.2011 |
| CEU | TP53TG3 | 32166603 | 1.4411 | 3.5818 | -1.6134 |
| CEU | TP53TG3 | 32171603 | 0.4104 | 2.2173 | -2.0186 |
| CEU | TP53TG3 | 32176603 | 1.9926 | 4.4346 | -1.5322 |
| CEU | TP53TG3 | 32181603 | 1.8518 | 4.7757 | -1.7197 |
| CEU | TP53TG3 | 32186603 | 0.9285 | 2.0467 | -1.3305 |
| CEU | TP53TG3 | 32191603 | 1.6947 | 2.0467 | -0.4188 |
| CEU | TP53TG3 | 32196603 | 1.0831 | 1.8762 | -1.0098 |
| CEU | TP53TG3 | 32201603 | 0.2676 | 1.7056 | -1.9695 |
| CEU | TP53TG3 | 32206603 | 0.27   | 2.5584 | -2.2796 |
| CEU | TP53TG3 | 32211603 | 1.22   | 2.729  | -1.4263 |
| CEU | TP53TG3 | 32216603 | 2.4575 | 3.4112 | -0.7491 |
| CEU | TP53TG3 | 32221603 | 1.6734 | 3.5818 | -1.4384 |
| CEU | TP53TG3 | 32226603 | 1.0676 | 2.0467 | -1.165  |
| CEU | TP53TG3 | 32231603 | 1.2115 | 0.8528 | 0.8078  |
| CEU | TP53TG3 | 32236603 | 0.6481 | 1.3645 | -1.159  |

## 2\_TajimasD\_data

|     |         |          |         |         |         |
|-----|---------|----------|---------|---------|---------|
| CEU | TP53TG3 | 32241603 | 0.5455  | 3.2407  | -2.21   |
| CEU | TP53TG3 | 32246603 | 1.0221  | 3.2407  | -1.8192 |
| CEU | TP53TG3 | 32251603 | 1.5343  | 2.3879  | -0.8989 |
| CEU | TP53TG3 | 32256603 | 1.8683  | 3.4112  | -1.2118 |
| CEU | TP53TG3 | 32261603 | 1.2486  | 3.7524  | -1.814  |
| CEU | TP53TG3 | 32266603 | 0.8437  | 3.2407  | -1.9655 |
| CEU | TP53TG3 | 32271603 | 4.0237  | 5.7991  | -0.8793 |
| CEU | TP53TG3 | 32276603 | 4.6966  | 7.6753  | -1.1449 |
| CEU | TP53TG3 | 32281603 | 1.4366  | 4.6052  | -1.9238 |
| CEU | TP53TG3 | 32286603 | 0.914   | 3.0701  | -1.8495 |
| CEU | TP53TG3 | 32291603 | 4.7225  | 6.4814  | -0.7884 |
| CEU | TP53TG3 | 32296603 | 5.5267  | 7.5047  | -0.7761 |
| CEU | TP53TG3 | 32301603 | 2.1049  | 3.4112  | -1.026  |
| CEU | TP53TG3 | 32306603 | 2.12    | 1.8762  | 0.3104  |
| CEU | TP53TG3 | 32311603 | 3.5232  | 3.2407  | 0.2316  |
| CEU | TP53TG3 | 32316603 | 3.4403  | 4.7757  | -0.7854 |
| CEU | TP53TG3 | 32321603 | 4.5659  | 6.6519  | -0.9133 |
| CEU | TP53TG3 | 32326603 | 5.5805  | 6.1402  | -0.2634 |
| CEU | TP53TG3 | 32331603 | 2.6737  | 3.4112  | -0.5792 |
| CEU | TP53TG3 | 32336603 | 1.2754  | 2.729   | -1.374  |
| CEU | TP53TG3 | 32341603 | 5.4012  | 6.6519  | -0.5476 |
| CEU | TP53TG3 | 32346603 | 5.0579  | 6.9931  | -0.8097 |
| CEU | TP53TG3 | 32351603 | 3.0293  | 5.1169  | -1.1555 |
| CEU | TP53TG3 | 32356603 | 4.0377  | 6.1402  | -0.9894 |
| CEU | TP53TG3 | 32361603 | 4.6506  | 6.9931  | -0.9801 |
| CEU | TP53TG3 | 32366603 | 5.4539  | 7.1636  | -0.6999 |
| CEU | TP53TG3 | 32371603 | 3.9043  | 7.1636  | -1.3342 |
| CEU | TP53TG3 | 32376603 | 3.079   | 8.8692  | -1.9484 |
| CEU | TP53TG3 | 32381603 | 4.0888  | 9.3809  | -1.6906 |
| CEU | TP53TG3 | 32386603 | 4.9864  | 7.5047  | -0.9881 |
| CEU | TP53TG3 | 32391603 | 7.0509  | 9.0398  | -0.6576 |
| CEU | TP53TG3 | 32396603 | 8.0134  | 9.3809  | -0.4369 |
| CEU | TP53TG3 | 32401603 | 6.3733  | 8.6987  | -0.7967 |
| CEU | TP53TG3 | 32406603 | 3.9738  | 8.6987  | -1.6187 |
| CEU | TP53TG3 | 32411603 | 4.8555  | 7.1636  | -0.9448 |
| CEU | TP53TG3 | 32416603 | 8.809   | 7.1636  | 0.6735  |
| CEU | TP53TG3 | 32421603 | 9.9877  | 9.5515  | 0.137   |
| CEU | TP53TG3 | 32426603 | 8.5675  | 11.0866 | -0.6886 |
| CEU | TP53TG3 | 32431603 | 7.9132  | 7.5047  | 0.1603  |
| CEU | TP53TG3 | 32436603 | 6.7271  | 6.4814  | 0.1101  |
| CEU | TP53TG3 | 32441603 | 2.8786  | 6.4814  | -1.6148 |
| CEU | TP53TG3 | 32446603 | 2.5935  | 6.3108  | -1.7067 |
| CEU | TP53TG3 | 32451603 | 4.4387  | 10.4043 | -1.7306 |
| CEU | TP53TG3 | 32456603 | 5.5512  | 9.7221  | -1.2889 |
| CEU | TP53TG3 | 32461603 | 5.2352  | 6.3108  | -0.4938 |
| CEU | TP53TG3 | 32466603 | 5.1934  | 7.1636  | -0.8065 |
| CEU | TP53TG3 | 32471603 | 11.7058 | 11.7688 | -0.0163 |
| CEU | TP53TG3 | 32476603 | 11.6133 | 13.3039 | -0.3891 |
| CEU | TP53TG3 | 32481603 | 7.4945  | 13.645  | -1.3822 |

## 2\_TajimasD\_data

|     |         |          |         |         |         |
|-----|---------|----------|---------|---------|---------|
| CEU | TP53TG3 | 32486603 | 7.4447  | 15.0095 | -1.5528 |
| CEU | TP53TG3 | 32491603 | 5.6419  | 11.2571 | -1.5131 |
| CEU | TP53TG3 | 32496603 | 3.9835  | 8.187   | -1.5228 |
| CEU | TP53TG3 | 32501603 | 7.4848  | 9.7221  | -0.6914 |
| CEU | TP53TG3 | 32506603 | 11.8091 | 11.5982 | 0.0553  |
| CEU | TP53TG3 | 32511603 | 11.3436 | 12.1099 | -0.1928 |
| CEU | TP53TG3 | 32516603 | 8.4401  | 11.5982 | -0.8274 |
| CEU | TP53TG3 | 32521603 | 9.9511  | 11.9394 | -0.5069 |
| CEU | TP53TG3 | 32526603 | 25.1362 | 15.5212 | 1.9115  |
| CEU | TP53TG3 | 32531603 | 23.0791 | 14.6684 | 1.7646  |
| CEU | TP53TG3 | 32536603 | 5.7153  | 10.0632 | -1.3012 |
| CEU | TP53TG3 | 32541603 | 1.8815  | 9.2104  | -2.3815 |
| CEU | TP53TG3 | 32546603 | 1.9699  | 8.8692  | -2.3216 |
| CEU | TP53TG3 | 32551603 | 3.0909  | 9.7221  | -2.0492 |
| CEU | TP53TG3 | 32556603 | 4.7118  | 9.8926  | -1.5753 |
| CEU | TP53TG3 | 32561603 | 5.3416  | 10.2337 | -1.4412 |
| CEU | TP53TG3 | 32566603 | 3.8477  | 11.4277 | -2.0139 |
| CEU | TP53TG3 | 32571603 | 3.0884  | 10.0632 | -2.0873 |
| CEU | TP53TG3 | 32576603 | 4.6205  | 9.8926  | -1.6031 |
| CEU | TP53TG3 | 32581603 | 5.7873  | 10.4043 | -1.3394 |
| CEU | TP53TG3 | 32586603 | 7.3345  | 12.2805 | -1.228  |
| CEU | TP53TG3 | 32591603 | 6.8412  | 11.4277 | -1.2185 |
| CEU | TP53TG3 | 32596603 | 5.7631  | 11.0866 | -1.4552 |
| CEU | TP53TG3 | 32601603 | 6.4671  | 11.5982 | -1.3444 |
| CEU | TP53TG3 | 32606603 | 6.0726  | 10.4043 | -1.2566 |
| CEU | TP53TG3 | 32611603 | 5.4669  | 10.7454 | -1.4857 |
| CEU | TP53TG3 | 32616603 | 5.162   | 10.916  | -1.5959 |
| CEU | TP53TG3 | 32621603 | 5.0427  | 11.0866 | -1.6521 |
| CEU | TP53TG3 | 32626603 | 6.0701  | 10.916  | -1.344  |
| CEU | TP53TG3 | 32631603 | 7.3137  | 10.4043 | -0.8966 |
| CEU | TP53TG3 | 32636603 | 7.27    | 10.0632 | -0.8359 |
| CEU | TP53TG3 | 32641603 | 12.3268 | 13.1333 | -0.1879 |
| CEU | TP53TG3 | 32646603 | 10.5093 | 12.4511 | -0.4759 |
| CEU | TP53TG3 | 32651603 | 7.2086  | 10.5749 | -0.9618 |
| CEU | TP53TG3 | 32656603 | 7.2076  | 9.2104  | -0.6508 |
| CEU | TP53TG3 | 32661603 | 1.7071  | 4.6052  | -1.7596 |
| CEU | TP53TG3 | 32666603 | 0.2197  | 1.7056  | -2.0351 |
| CEU | TP53TG3 | 32671603 | 0.0101  | 0.1706  | -0.9534 |
| CEU | TP53TG3 | 32676603 | 0       | 0       | 0       |
| CEU | TP53TG3 | 32681603 | 0       | 0.1706  | -1.0134 |
| CEU | TP53TG3 | 32686603 | 0.3191  | 0.5117  | -0.604  |
| CEU | TP53TG3 | 32691603 | 0.4042  | 0.5117  | -0.3371 |
| CEU | TP53TG3 | 32696603 | 0.3395  | 0.6822  | -0.8949 |
| CEU | TP53TG3 | 32701603 | 0.437   | 0.6822  | -0.6403 |
| CEU | TP53TG3 | 32706603 | 0.1826  | 0.1706  | 0.0713  |
| CEU | TP53TG3 | 32711603 | 0       | 0       | 0       |
| CEU | TP53TG3 | 32716603 | 0       | 0       | 0       |
| CEU | TP53TG3 | 32721603 | 0       | 0       | 0       |
| CEU | TP53TG3 | 32726603 | 0       | 0       | 0       |

## 2\_TajimasD\_data

|     |         |          |         |        |         |
|-----|---------|----------|---------|--------|---------|
| CEU | TP53TG3 | 32731603 | 0       | 0      | 0       |
| CEU | TP53TG3 | 32736603 | 0.0101  | 0.1706 | -0.9534 |
| CEU | TP53TG3 | 32741603 | 0.0101  | 0.1706 | -0.9534 |
| CEU | TP53TG3 | 32746603 | 0.0101  | 0.1706 | -0.9534 |
| CHB | TP53TG3 | 31756603 | 9.6695  | 7.2848 | 0.9586  |
| CHB | TP53TG3 | 31761603 | 8.2939  | 7.1154 | 0.484   |
| CHB | TP53TG3 | 31766603 | 8.2549  | 6.4378 | 0.817   |
| CHB | TP53TG3 | 31771603 | 16.143  | 9.8261 | 1.9273  |
| CHB | TP53TG3 | 31776603 | 14.7523 | 9.8261 | 1.503   |
| CHB | TP53TG3 | 31781603 | 7.3668  | 6.946  | 0.1766  |
| CHB | TP53TG3 | 31786603 | 9.4911  | 8.1319 | 0.494   |
| CHB | TP53TG3 | 31791603 | 8.7169  | 8.3013 | 0.1482  |
| CHB | TP53TG3 | 31796603 | 7.3482  | 6.4378 | 0.4093  |
| CHB | TP53TG3 | 31801603 | 6.8037  | 5.0825 | 0.9556  |
| CHB | TP53TG3 | 31806603 | 8.225   | 6.6072 | 0.7106  |
| CHB | TP53TG3 | 31811603 | 14.9874 | 9.9955 | 1.499   |
| CHB | TP53TG3 | 31816603 | 12.6056 | 8.8096 | 1.2816  |
| CHB | TP53TG3 | 31821603 | 5.4717  | 6.0989 | -0.2961 |
| CHB | TP53TG3 | 31826603 | 4.9612  | 5.9295 | -0.4688 |
| CHB | TP53TG3 | 31831603 | 8.9768  | 7.2848 | 0.6801  |
| CHB | TP53TG3 | 31836603 | 12.0335 | 8.6402 | 1.1664  |
| CHB | TP53TG3 | 31841603 | 9.2692  | 7.7931 | 0.5579  |
| CHB | TP53TG3 | 31846603 | 11.1571 | 9.9955 | 0.3488  |
| CHB | TP53TG3 | 31851603 | 11.5252 | 9.4872 | 0.6424  |
| CHB | TP53TG3 | 31856603 | 8.2105  | 7.1154 | 0.4497  |
| CHB | TP53TG3 | 31861603 | 4.7476  | 6.6072 | -0.8168 |
| CHB | TP53TG3 | 31866603 | 0.8778  | 5.5907 | -2.4046 |
| CHB | TP53TG3 | 31871603 | 0.7346  | 5.4213 | -2.4576 |
| CHB | TP53TG3 | 31876603 | 0.823   | 5.7601 | -2.4529 |
| CHB | TP53TG3 | 31881603 | 1.1734  | 4.7436 | -2.106  |
| CHB | TP53TG3 | 31886603 | 1.4125  | 5.2519 | -2.0707 |
| CHB | TP53TG3 | 31891603 | 1.4059  | 5.2519 | -2.0743 |
| CHB | TP53TG3 | 31896603 | 1.3451  | 4.7436 | -2.0047 |
| CHB | TP53TG3 | 31901603 | 1.0314  | 5.9295 | -2.3712 |
| CHB | TP53TG3 | 31906603 | 0.6073  | 5.7601 | -2.56   |
| CHB | TP53TG3 | 31911603 | 1.1102  | 5.2519 | -2.2337 |
| CHB | TP53TG3 | 31916603 | 1.422   | 7.1154 | -2.3381 |
| CHB | TP53TG3 | 31921603 | 0.8214  | 6.7766 | -2.5564 |
| CHB | TP53TG3 | 31926603 | 0.917   | 4.4048 | -2.1947 |
| CHB | TP53TG3 | 31931603 | 1.4411  | 4.913  | -1.9859 |
| CHB | TP53TG3 | 31936603 | 1.3977  | 5.2519 | -2.0787 |
| CHB | TP53TG3 | 31941603 | 1.6227  | 6.0989 | -2.113  |
| CHB | TP53TG3 | 31946603 | 1.7342  | 8.6402 | -2.3738 |
| CHB | TP53TG3 | 31951603 | 1.0916  | 7.9625 | -2.5461 |
| CHB | TP53TG3 | 31956603 | 0.6335  | 5.0825 | -2.47   |
| CHB | TP53TG3 | 31961603 | 0.7649  | 5.5907 | -2.4622 |
| CHB | TP53TG3 | 31966603 | 2.3714  | 5.9295 | -1.7225 |
| CHB | TP53TG3 | 31971603 | 4.1388  | 5.9295 | -0.8669 |
| CHB | TP53TG3 | 31976603 | 3.5096  | 6.0989 | -1.2223 |

## 2\_TajimasD\_data

|     |         |          |        |         |         |
|-----|---------|----------|--------|---------|---------|
| CHB | TP53TG3 | 31981603 | 1.6948 | 5.0825  | -1.8808 |
| CHB | TP53TG3 | 31986603 | 1.1953 | 7.4543  | -2.4637 |
| CHB | TP53TG3 | 31991603 | 2.0702 | 10.3343 | -2.4056 |
| CHB | TP53TG3 | 31996603 | 1.7786 | 7.2848  | -2.2133 |
| CHB | TP53TG3 | 32001603 | 1.8582 | 5.0825  | -1.7901 |
| CHB | TP53TG3 | 32006603 | 1.6457 | 6.0989  | -2.1021 |
| CHB | TP53TG3 | 32011603 | 1.2562 | 7.9625  | -2.4851 |
| CHB | TP53TG3 | 32016603 | 2.6731 | 7.9625  | -1.9601 |
| CHB | TP53TG3 | 32021603 | 2.6358 | 5.7601  | -1.5522 |
| CHB | TP53TG3 | 32026603 | 2.471  | 6.2684  | -1.7489 |
| CHB | TP53TG3 | 32031603 | 2.893  | 6.4378  | -1.5939 |
| CHB | TP53TG3 | 32036603 | 2.3019 | 4.913   | -1.4935 |
| CHB | TP53TG3 | 32041603 | 1.189  | 3.2189  | -1.6689 |
| CHB | TP53TG3 | 32046603 | 1.238  | 2.5412  | -1.3013 |
| CHB | TP53TG3 | 32051603 | 2.048  | 3.3883  | -1.0555 |
| CHB | TP53TG3 | 32056603 | 1.9473 | 3.0495  | -0.9479 |
| CHB | TP53TG3 | 32061603 | 1.0998 | 2.7106  | -1.5263 |
| CHB | TP53TG3 | 32066603 | 0.8388 | 3.3883  | -2.0078 |
| CHB | TP53TG3 | 32071603 | 0.9052 | 3.2189  | -1.9022 |
| CHB | TP53TG3 | 32076603 | 1.6141 | 4.066   | -1.6534 |
| CHB | TP53TG3 | 32081603 | 2.0693 | 4.913   | -1.6266 |
| CHB | TP53TG3 | 32086603 | 1.4049 | 5.4213  | -2.1061 |
| CHB | TP53TG3 | 32091603 | 1.8032 | 6.0989  | -2.0278 |
| CHB | TP53TG3 | 32096603 | 1.7748 | 4.5742  | -1.7046 |
| CHB | TP53TG3 | 32101603 | 0.815  | 2.2024  | -1.5535 |
| CHB | TP53TG3 | 32106603 | 1.5694 | 2.8801  | -1.1817 |
| CHB | TP53TG3 | 32111603 | 1.6391 | 4.4048  | -1.7403 |
| CHB | TP53TG3 | 32116603 | 1.2155 | 4.913   | -2.115  |
| CHB | TP53TG3 | 32121603 | 1.4312 | 5.4213  | -2.0923 |
| CHB | TP53TG3 | 32126603 | 1.076  | 5.4213  | -2.2785 |
| CHB | TP53TG3 | 32131603 | 1.1256 | 5.9295  | -2.3256 |
| CHB | TP53TG3 | 32136603 | 1.1207 | 5.0825  | -2.1995 |
| CHB | TP53TG3 | 32141603 | 1.3411 | 4.7436  | -2.0071 |
| CHB | TP53TG3 | 32146603 | 0.7173 | 3.3883  | -2.1035 |
| CHB | TP53TG3 | 32151603 | 0.2271 | 1.8636  | -2.0879 |
| CHB | TP53TG3 | 32156603 | 1.0754 | 2.033   | -1.1419 |
| CHB | TP53TG3 | 32161603 | 2.0624 | 3.3883  | -1.0442 |
| CHB | TP53TG3 | 32166603 | 1.1854 | 2.8801  | -1.528  |
| CHB | TP53TG3 | 32171603 | 0.1354 | 1.6942  | -2.1393 |
| CHB | TP53TG3 | 32176603 | 1.3577 | 6.6072  | -2.3056 |
| CHB | TP53TG3 | 32181603 | 1.7198 | 7.1154  | -2.2158 |
| CHB | TP53TG3 | 32186603 | 1.0006 | 3.0495  | -1.7621 |
| CHB | TP53TG3 | 32191603 | 1.201  | 3.2189  | -1.659  |
| CHB | TP53TG3 | 32196603 | 0.7371 | 3.2189  | -2.0404 |
| CHB | TP53TG3 | 32201603 | 0.1359 | 2.2024  | -2.3139 |
| CHB | TP53TG3 | 32206603 | 0.6667 | 2.2024  | -1.7196 |
| CHB | TP53TG3 | 32211603 | 1.878  | 4.4048  | -1.59   |
| CHB | TP53TG3 | 32216603 | 2.6475 | 5.7601  | -1.5464 |
| CHB | TP53TG3 | 32221603 | 2.8217 | 4.5742  | -1.0671 |

## 2\_TajimasD\_data

|     |         |          |        |         |         |
|-----|---------|----------|--------|---------|---------|
| CHB | TP53TG3 | 32226603 | 1.8679 | 2.2024  | -0.3745 |
| CHB | TP53TG3 | 32231603 | 0.8833 | 0.5082  | 1.1775  |
| CHB | TP53TG3 | 32236603 | 0.9376 | 0.8471  | 0.2041  |
| CHB | TP53TG3 | 32241603 | 0.6688 | 2.2024  | -1.7172 |
| CHB | TP53TG3 | 32246603 | 0.7727 | 3.5577  | -2.1048 |
| CHB | TP53TG3 | 32251603 | 1.3287 | 2.8801  | -1.3988 |
| CHB | TP53TG3 | 32256603 | 1.7218 | 3.2189  | -1.2308 |
| CHB | TP53TG3 | 32261603 | 1.1196 | 3.2189  | -1.7259 |
| CHB | TP53TG3 | 32266603 | 0.4295 | 2.3718  | -2.0503 |
| CHB | TP53TG3 | 32271603 | 3.1378 | 7.2848  | -1.667  |
| CHB | TP53TG3 | 32276603 | 3.7521 | 9.9955  | -1.8748 |
| CHB | TP53TG3 | 32281603 | 1.1631 | 5.9295  | -2.3075 |
| CHB | TP53TG3 | 32286603 | 1.1805 | 3.3883  | -1.7387 |
| CHB | TP53TG3 | 32291603 | 5.1456 | 7.6237  | -0.9556 |
| CHB | TP53TG3 | 32296603 | 5.506  | 8.4708  | -1.0379 |
| CHB | TP53TG3 | 32301603 | 1.7912 | 2.7106  | -0.8712 |
| CHB | TP53TG3 | 32306603 | 1.5365 | 1.0165  | 1.0348  |
| CHB | TP53TG3 | 32311603 | 3.9372 | 4.2354  | -0.1941 |
| CHB | TP53TG3 | 32316603 | 4.0687 | 5.4213  | -0.7093 |
| CHB | TP53TG3 | 32321603 | 3.1237 | 5.2519  | -1.1478 |
| CHB | TP53TG3 | 32326603 | 4.6761 | 6.7766  | -0.9017 |
| CHB | TP53TG3 | 32331603 | 2.888  | 4.7436  | -1.0946 |
| CHB | TP53TG3 | 32336603 | 1.3196 | 3.0495  | -1.4877 |
| CHB | TP53TG3 | 32341603 | 5.0543 | 5.9295  | -0.4237 |
| CHB | TP53TG3 | 32346603 | 4.9318 | 5.4213  | -0.2567 |
| CHB | TP53TG3 | 32351603 | 2.8593 | 4.7436  | -1.1115 |
| CHB | TP53TG3 | 32356603 | 3.1454 | 6.7766  | -1.5587 |
| CHB | TP53TG3 | 32361603 | 3.9276 | 5.5907  | -0.8486 |
| CHB | TP53TG3 | 32366603 | 4.868  | 5.7601  | -0.4432 |
| CHB | TP53TG3 | 32371603 | 3.6827 | 8.1319  | -1.6172 |
| CHB | TP53TG3 | 32376603 | 2.7579 | 10.8426 | -2.25   |
| CHB | TP53TG3 | 32381603 | 3.0558 | 12.1979 | -2.2777 |
| CHB | TP53TG3 | 32386603 | 4.2631 | 12.1979 | -1.9769 |
| CHB | TP53TG3 | 32391603 | 6.9096 | 11.6896 | -1.2396 |
| CHB | TP53TG3 | 32396603 | 8.4624 | 9.8261  | -0.4161 |
| CHB | TP53TG3 | 32401603 | 6.3109 | 7.2848  | -0.3915 |
| CHB | TP53TG3 | 32406603 | 3.6512 | 7.1154  | -1.4226 |
| CHB | TP53TG3 | 32411603 | 4.3531 | 7.9625  | -1.3375 |
| CHB | TP53TG3 | 32416603 | 7.3806 | 8.979   | -0.5302 |
| CHB | TP53TG3 | 32421603 | 8.7711 | 10.8426 | -0.5765 |
| CHB | TP53TG3 | 32426603 | 7.1334 | 7.9625  | -0.3072 |
| CHB | TP53TG3 | 32431603 | 6.8132 | 6.0989  | 0.3372  |
| CHB | TP53TG3 | 32436603 | 5.932  | 7.4543  | -0.5992 |
| CHB | TP53TG3 | 32441603 | 2.2336 | 6.6072  | -1.9209 |
| CHB | TP53TG3 | 32446603 | 2.2627 | 6.946   | -1.9659 |
| CHB | TP53TG3 | 32451603 | 3.0857 | 9.4872  | -2.0179 |
| CHB | TP53TG3 | 32456603 | 5.0168 | 10.6731 | -1.5976 |
| CHB | TP53TG3 | 32461603 | 5.8209 | 10.5037 | -1.3425 |
| CHB | TP53TG3 | 32466603 | 6.1173 | 12.0285 | -1.4923 |

## 2\_TajimasD\_data

|     |         |          |         |         |         |
|-----|---------|----------|---------|---------|---------|
| CHB | TP53TG3 | 32471603 | 12.1176 | 13.892  | -0.3909 |
| CHB | TP53TG3 | 32476603 | 10.964  | 12.5367 | -0.3818 |
| CHB | TP53TG3 | 32481603 | 6.431   | 14.4003 | -1.6967 |
| CHB | TP53TG3 | 32486603 | 6.7449  | 15.4168 | -1.7302 |
| CHB | TP53TG3 | 32491603 | 5.7342  | 10.6731 | -1.3949 |
| CHB | TP53TG3 | 32496603 | 4.1001  | 8.1319  | -1.4655 |
| CHB | TP53TG3 | 32501603 | 7.0223  | 9.6567  | -0.8169 |
| CHB | TP53TG3 | 32506603 | 10.8435 | 13.3838 | -0.5798 |
| CHB | TP53TG3 | 32511603 | 11.2345 | 12.3673 | -0.2786 |
| CHB | TP53TG3 | 32516603 | 8.4988  | 10.8426 | -0.6523 |
| CHB | TP53TG3 | 32521603 | 9.7007  | 12.8755 | -0.7516 |
| CHB | TP53TG3 | 32526603 | 25.3172 | 17.4498 | 1.3944  |
| CHB | TP53TG3 | 32531603 | 23.0249 | 16.7721 | 1.1511  |
| CHB | TP53TG3 | 32536603 | 5.5582  | 11.5202 | -1.5675 |
| CHB | TP53TG3 | 32541603 | 1.8417  | 10.8426 | -2.505  |
| CHB | TP53TG3 | 32546603 | 1.8272  | 11.6896 | -2.5576 |
| CHB | TP53TG3 | 32551603 | 2.364   | 9.4872  | -2.2454 |
| CHB | TP53TG3 | 32556603 | 3.4506  | 7.2848  | -1.5412 |
| CHB | TP53TG3 | 32561603 | 4.333   | 9.8261  | -1.676  |
| CHB | TP53TG3 | 32566603 | 3.4043  | 9.6567  | -1.9387 |
| CHB | TP53TG3 | 32571603 | 2.4565  | 8.3013  | -2.0845 |
| CHB | TP53TG3 | 32576603 | 3.4458  | 10.8426 | -2.0586 |
| CHB | TP53TG3 | 32581603 | 4.9678  | 12.7061 | -1.8551 |
| CHB | TP53TG3 | 32586603 | 6.0685  | 11.3508 | -1.4083 |
| CHB | TP53TG3 | 32591603 | 5.2164  | 9.6567  | -1.3768 |
| CHB | TP53TG3 | 32596603 | 3.8587  | 10.3343 | -1.885  |
| CHB | TP53TG3 | 32601603 | 5.0828  | 11.8591 | -1.7337 |
| CHB | TP53TG3 | 32606603 | 6.0107  | 13.5532 | -1.701  |
| CHB | TP53TG3 | 32611603 | 4.7906  | 12.0285 | -1.8272 |
| CHB | TP53TG3 | 32616603 | 4.5667  | 13.045  | -1.9825 |
| CHB | TP53TG3 | 32621603 | 5.2355  | 14.7391 | -1.9791 |
| CHB | TP53TG3 | 32626603 | 5.0274  | 13.045  | -1.8748 |
| CHB | TP53TG3 | 32631603 | 6.1712  | 12.7061 | -1.5666 |
| CHB | TP53TG3 | 32636603 | 7.0985  | 10.1649 | -0.9065 |
| CHB | TP53TG3 | 32641603 | 11.6807 | 12.3673 | -0.1689 |
| CHB | TP53TG3 | 32646603 | 9.6399  | 12.7061 | -0.735  |
| CHB | TP53TG3 | 32651603 | 6.1447  | 11.012  | -1.3351 |
| CHB | TP53TG3 | 32656603 | 5.9058  | 9.8261  | -1.1961 |
| CHB | TP53TG3 | 32661603 | 1.0501  | 4.066   | -2.0337 |
| CHB | TP53TG3 | 32666603 | 0.0765  | 0.6777  | -1.5717 |
| CHB | TP53TG3 | 32671603 | 0.0097  | 0.1694  | -0.949  |
| CHB | TP53TG3 | 32676603 | 0.0097  | 0.1694  | -0.949  |
| CHB | TP53TG3 | 32681603 | 0       | 0.1694  | -1.0066 |
| CHB | TP53TG3 | 32686603 | 0.0194  | 0.5082  | -1.5344 |
| CHB | TP53TG3 | 32691603 | 0.0672  | 0.5082  | -1.3844 |
| CHB | TP53TG3 | 32696603 | 0.2109  | 0.8471  | -1.4346 |
| CHB | TP53TG3 | 32701603 | 0.616   | 0.8471  | -0.5211 |
| CHB | TP53TG3 | 32706603 | 0.4529  | 0.1694  | 1.6846  |
| CHB | TP53TG3 | 32711603 | 0       | 0       | 0       |

## 2\_TajimasD\_data

|     |         |          |         |         |         |
|-----|---------|----------|---------|---------|---------|
| CHB | TP53TG3 | 32716603 | 0.0577  | 0.3388  | -1.1276 |
| CHB | TP53TG3 | 32721603 | 0.0771  | 0.5082  | -1.3533 |
| CHB | TP53TG3 | 32726603 | 0.0194  | 0.1694  | -0.8913 |
| CHB | TP53TG3 | 32731603 | 0       | 0       | 0       |
| CHB | TP53TG3 | 32736603 | 0       | 0       | 0       |
| CHB | TP53TG3 | 32741603 | 0       | 0       | 0       |
| CHB | TP53TG3 | 32746603 | 0.0097  | 0.1694  | -0.949  |
| YRI | TP53TG3 | 31756603 | 9.1971  | 9.9157  | -0.2167 |
| YRI | TP53TG3 | 31761603 | 8.4737  | 10.4199 | -0.5603 |
| YRI | TP53TG3 | 31766603 | 8.875   | 8.7392  | 0.046   |
| YRI | TP53TG3 | 31771603 | 10.9483 | 11.7644 | -0.2097 |
| YRI | TP53TG3 | 31776603 | 8.8276  | 12.9408 | -0.9658 |
| YRI | TP53TG3 | 31781603 | 6.7728  | 10.2518 | -1.0168 |
| YRI | TP53TG3 | 31786603 | 9.3169  | 11.9324 | -0.663  |
| YRI | TP53TG3 | 31791603 | 8.9721  | 12.7727 | -0.9035 |
| YRI | TP53TG3 | 31796603 | 7.3968  | 10.924  | -0.9715 |
| YRI | TP53TG3 | 31801603 | 6.7763  | 8.7392  | -0.6654 |
| YRI | TP53TG3 | 31806603 | 9.093   | 9.9157  | -0.248  |
| YRI | TP53TG3 | 31811603 | 14.7825 | 13.7811 | 0.2215  |
| YRI | TP53TG3 | 31816603 | 11.381  | 13.613  | -0.4996 |
| YRI | TP53TG3 | 31821603 | 5.132   | 10.4199 | -1.5222 |
| YRI | TP53TG3 | 31826603 | 4.6658  | 8.7392  | -1.3808 |
| YRI | TP53TG3 | 31831603 | 8.7007  | 9.9157  | -0.3663 |
| YRI | TP53TG3 | 31836603 | 11.6611 | 12.4366 | -0.1891 |
| YRI | TP53TG3 | 31841603 | 8.4619  | 11.2602 | -0.7491 |
| YRI | TP53TG3 | 31846603 | 8.6489  | 14.2853 | -1.2051 |
| YRI | TP53TG3 | 31851603 | 9.3898  | 15.6298 | -1.2247 |
| YRI | TP53TG3 | 31856603 | 7.2877  | 11.7644 | -1.1501 |
| YRI | TP53TG3 | 31861603 | 6.7044  | 9.4115  | -0.8568 |
| YRI | TP53TG3 | 31866603 | 6.2224  | 7.5628  | -0.5189 |
| YRI | TP53TG3 | 31871603 | 4.4868  | 6.5544  | -0.9116 |
| YRI | TP53TG3 | 31876603 | 4.794   | 7.7309  | -1.1143 |
| YRI | TP53TG3 | 31881603 | 4.6042  | 8.067   | -1.2636 |
| YRI | TP53TG3 | 31886603 | 4.3419  | 7.8989  | -1.3233 |
| YRI | TP53TG3 | 31891603 | 5.2216  | 8.067   | -1.0383 |
| YRI | TP53TG3 | 31896603 | 5.4713  | 8.4031  | -1.0304 |
| YRI | TP53TG3 | 31901603 | 8.3028  | 9.2434  | -0.3027 |
| YRI | TP53TG3 | 31906603 | 10.29   | 8.067   | 0.8112  |
| YRI | TP53TG3 | 31911603 | 9.7405  | 9.2434  | 0.16    |
| YRI | TP53TG3 | 31916603 | 10.6415 | 11.4282 | -0.2077 |
| YRI | TP53TG3 | 31921603 | 7.8703  | 10.0837 | -0.657  |
| YRI | TP53TG3 | 31926603 | 4.2397  | 7.5628  | -1.2865 |
| YRI | TP53TG3 | 31931603 | 6.6176  | 7.5628  | -0.3659 |
| YRI | TP53TG3 | 31936603 | 8.0799  | 9.4115  | -0.4214 |
| YRI | TP53TG3 | 31941603 | 9.1746  | 9.7476  | -0.1755 |
| YRI | TP53TG3 | 31946603 | 11.1066 | 9.9157  | 0.3591  |
| YRI | TP53TG3 | 31951603 | 9.0987  | 10.0837 | -0.2924 |
| YRI | TP53TG3 | 31956603 | 5.425   | 8.067   | -0.9641 |
| YRI | TP53TG3 | 31961603 | 5.0239  | 7.3947  | -0.9368 |



## 2\_TajimasD\_data

|     |         |          |         |         |         |
|-----|---------|----------|---------|---------|---------|
| YRI | TP53TG3 | 31966603 | 4.587   | 8.067   | -1.2699 |
| YRI | TP53TG3 | 31971603 | 3.9894  | 7.2267  | -1.3063 |
| YRI | TP53TG3 | 31976603 | 5.9609  | 7.5628  | -0.6201 |
| YRI | TP53TG3 | 31981603 | 4.8528  | 7.7309  | -1.092  |
| YRI | TP53TG3 | 31986603 | 7.2828  | 8.4031  | -0.3937 |
| YRI | TP53TG3 | 31991603 | 11.1458 | 10.924  | 0.0611  |
| YRI | TP53TG3 | 31996603 | 6.9478  | 9.5795  | -0.8193 |
| YRI | TP53TG3 | 32001603 | 5.9053  | 9.2434  | -1.0743 |
| YRI | TP53TG3 | 32006603 | 7.0823  | 9.9157  | -0.8543 |
| YRI | TP53TG3 | 32011603 | 6.6095  | 11.9324 | -1.3493 |
| YRI | TP53TG3 | 32016603 | 7.5309  | 13.2769 | -1.3169 |
| YRI | TP53TG3 | 32021603 | 7.1952  | 10.2518 | -0.8934 |
| YRI | TP53TG3 | 32026603 | 8.8323  | 11.5963 | -0.7198 |
| YRI | TP53TG3 | 32031603 | 10.7792 | 11.7644 | -0.2531 |
| YRI | TP53TG3 | 32036603 | 7.0424  | 7.5628  | -0.2015 |
| YRI | TP53TG3 | 32041603 | 2.3049  | 4.3696  | -1.3037 |
| YRI | TP53TG3 | 32046603 | 2.2493  | 3.3612  | -0.8784 |
| YRI | TP53TG3 | 32051603 | 2.8621  | 4.2016  | -0.875  |
| YRI | TP53TG3 | 32056603 | 2.3433  | 5.378   | -1.5971 |
| YRI | TP53TG3 | 32061603 | 1.8541  | 5.2099  | -1.8164 |
| YRI | TP53TG3 | 32066603 | 1.4728  | 4.7057  | -1.9137 |
| YRI | TP53TG3 | 32071603 | 1.8446  | 4.5377  | -1.6456 |
| YRI | TP53TG3 | 32076603 | 3.4841  | 5.0419  | -0.868  |
| YRI | TP53TG3 | 32081603 | 5.5413  | 7.0586  | -0.6255 |
| YRI | TP53TG3 | 32086603 | 5.1151  | 6.0502  | -0.4431 |
| YRI | TP53TG3 | 32091603 | 4.757   | 6.2183  | -0.6755 |
| YRI | TP53TG3 | 32096603 | 4.9839  | 7.2267  | -0.905  |
| YRI | TP53TG3 | 32101603 | 2.6102  | 3.5293  | -0.6969 |
| YRI | TP53TG3 | 32106603 | 1.7876  | 4.3696  | -1.6303 |
| YRI | TP53TG3 | 32111603 | 3.3492  | 6.0502  | -1.2797 |
| YRI | TP53TG3 | 32116603 | 4.8464  | 6.0502  | -0.5704 |
| YRI | TP53TG3 | 32121603 | 5.2006  | 8.067   | -1.046  |
| YRI | TP53TG3 | 32126603 | 4.5595  | 9.9157  | -1.6149 |
| YRI | TP53TG3 | 32131603 | 5.9793  | 13.445  | -1.6908 |
| YRI | TP53TG3 | 32136603 | 5.8276  | 11.9324 | -1.5476 |
| YRI | TP53TG3 | 32141603 | 4.8707  | 7.3947  | -0.9974 |
| YRI | TP53TG3 | 32146603 | 3.5905  | 4.3696  | -0.4919 |
| YRI | TP53TG3 | 32151603 | 1.4137  | 3.3612  | -1.5386 |
| YRI | TP53TG3 | 32156603 | 1.172   | 4.8738  | -2.1249 |
| YRI | TP53TG3 | 32161603 | 2.4422  | 7.2267  | -1.9306 |
| YRI | TP53TG3 | 32166603 | 2.7086  | 7.3947  | -1.8517 |
| YRI | TP53TG3 | 32171603 | 1.3846  | 5.0419  | -2.0377 |
| YRI | TP53TG3 | 32176603 | 3.8313  | 7.7309  | -1.4796 |
| YRI | TP53TG3 | 32181603 | 4.3292  | 7.5628  | -1.2518 |
| YRI | TP53TG3 | 32186603 | 2.2014  | 4.7057  | -1.4824 |
| YRI | TP53TG3 | 32191603 | 2.8458  | 5.2099  | -1.2796 |
| YRI | TP53TG3 | 32196603 | 1.7502  | 4.0335  | -1.5449 |
| YRI | TP53TG3 | 32201603 | 0.8909  | 3.3612  | -1.9516 |
| YRI | TP53TG3 | 32206603 | 1.2925  | 3.3612  | -1.6344 |

## 2\_TajimasD\_data

|     |         |          |         |         |         |
|-----|---------|----------|---------|---------|---------|
| YRI | TP53TG3 | 32211603 | 2.5313  | 4.7057  | -1.2871 |
| YRI | TP53TG3 | 32216603 | 3.568   | 5.8822  | -1.1245 |
| YRI | TP53TG3 | 32221603 | 2.9906  | 7.5628  | -1.77   |
| YRI | TP53TG3 | 32226603 | 2.0512  | 5.8822  | -1.8615 |
| YRI | TP53TG3 | 32231603 | 1.4174  | 2.0167  | -0.7166 |
| YRI | TP53TG3 | 32236603 | 1.1116  | 2.3529  | -1.314  |
| YRI | TP53TG3 | 32241603 | 1.5059  | 3.8654  | -1.6558 |
| YRI | TP53TG3 | 32246603 | 2.1792  | 4.2016  | -1.3211 |
| YRI | TP53TG3 | 32251603 | 2.0815  | 4.0335  | -1.3207 |
| YRI | TP53TG3 | 32256603 | 2.1886  | 5.378   | -1.6785 |
| YRI | TP53TG3 | 32261603 | 1.7226  | 5.2099  | -1.8876 |
| YRI | TP53TG3 | 32266603 | 1.0268  | 3.6974  | -1.9465 |
| YRI | TP53TG3 | 32271603 | 4.6892  | 10.4199 | -1.6497 |
| YRI | TP53TG3 | 32276603 | 6.1415  | 15.1256 | -1.8192 |
| YRI | TP53TG3 | 32281603 | 2.8082  | 10.4199 | -2.1912 |
| YRI | TP53TG3 | 32286603 | 1.6504  | 7.2267  | -2.2501 |
| YRI | TP53TG3 | 32291603 | 7.1051  | 11.7644 | -1.197  |
| YRI | TP53TG3 | 32296603 | 7.3655  | 11.7644 | -1.1301 |
| YRI | TP53TG3 | 32301603 | 1.7656  | 4.3696  | -1.6442 |
| YRI | TP53TG3 | 32306603 | 1.6586  | 3.0251  | -1.1788 |
| YRI | TP53TG3 | 32311603 | 3.4224  | 5.2099  | -0.9675 |
| YRI | TP53TG3 | 32316603 | 3.6655  | 6.0502  | -1.1299 |
| YRI | TP53TG3 | 32321603 | 3.4812  | 6.5544  | -1.3549 |
| YRI | TP53TG3 | 32326603 | 4.3457  | 6.7225  | -1.0242 |
| YRI | TP53TG3 | 32331603 | 2.464   | 4.3696  | -1.2032 |
| YRI | TP53TG3 | 32336603 | 1.6636  | 5.0419  | -1.8823 |
| YRI | TP53TG3 | 32341603 | 5.802   | 9.7476  | -1.2087 |
| YRI | TP53TG3 | 32346603 | 6.1484  | 10.924  | -1.3153 |
| YRI | TP53TG3 | 32351603 | 3.8565  | 9.7476  | -1.8047 |
| YRI | TP53TG3 | 32356603 | 4.3165  | 10.924  | -1.8198 |
| YRI | TP53TG3 | 32361603 | 5.5185  | 11.0921 | -1.5133 |
| YRI | TP53TG3 | 32366603 | 5.3385  | 9.7476  | -1.3507 |
| YRI | TP53TG3 | 32371603 | 4.4795  | 12.7727 | -1.9716 |
| YRI | TP53TG3 | 32376603 | 6.2194  | 18.4868 | -2.0501 |
| YRI | TP53TG3 | 32381603 | 6.8377  | 20.1675 | -2.0487 |
| YRI | TP53TG3 | 32386603 | 8.688   | 20.8397 | -1.8095 |
| YRI | TP53TG3 | 32391603 | 11.1145 | 18.4868 | -1.232  |
| YRI | TP53TG3 | 32396603 | 10.4523 | 15.4617 | -0.9933 |
| YRI | TP53TG3 | 32401603 | 9.0633  | 15.1256 | -1.2276 |
| YRI | TP53TG3 | 32406603 | 6.6408  | 14.1172 | -1.6166 |
| YRI | TP53TG3 | 32411603 | 6.7971  | 13.1089 | -1.4641 |
| YRI | TP53TG3 | 32416603 | 9.0444  | 11.4282 | -0.6293 |
| YRI | TP53TG3 | 32421603 | 9.9751  | 12.7727 | -0.6651 |
| YRI | TP53TG3 | 32426603 | 9.9186  | 14.4534 | -0.9589 |
| YRI | TP53TG3 | 32431603 | 9.5019  | 12.1005 | -0.6501 |
| YRI | TP53TG3 | 32436603 | 7.4481  | 10.756  | -0.9244 |
| YRI | TP53TG3 | 32441603 | 3.2669  | 9.4115  | -1.9447 |
| YRI | TP53TG3 | 32446603 | 3.5013  | 10.2518 | -1.973  |
| YRI | TP53TG3 | 32451603 | 6.0541  | 13.445  | -1.6738 |

## 2\_TajimasD\_data

|     |         |          |         |         |         |
|-----|---------|----------|---------|---------|---------|
| YRI | TP53TG3 | 32456603 | 8.154   | 14.2853 | -1.3109 |
| YRI | TP53TG3 | 32461603 | 8.1121  | 13.613  | -1.2312 |
| YRI | TP53TG3 | 32466603 | 7.9852  | 13.7811 | -1.2822 |
| YRI | TP53TG3 | 32471603 | 14.4286 | 16.8062 | -0.4354 |
| YRI | TP53TG3 | 32476603 | 13.8711 | 18.4868 | -0.7713 |
| YRI | TP53TG3 | 32481603 | 9.4258  | 21.3439 | -1.7342 |
| YRI | TP53TG3 | 32486603 | 9.6874  | 22.1842 | -1.7518 |
| YRI | TP53TG3 | 32491603 | 7.6154  | 15.9659 | -1.6059 |
| YRI | TP53TG3 | 32496603 | 5.625   | 12.7727 | -1.6993 |
| YRI | TP53TG3 | 32501603 | 9.2013  | 16.8062 | -1.3925 |
| YRI | TP53TG3 | 32506603 | 13.992  | 20.3355 | -0.9672 |
| YRI | TP53TG3 | 32511603 | 14.1035 | 19.6633 | -0.8756 |
| YRI | TP53TG3 | 32516603 | 11.2445 | 19.3272 | -1.2942 |
| YRI | TP53TG3 | 32521603 | 12.1732 | 18.3188 | -1.0361 |
| YRI | TP53TG3 | 32526603 | 26.2545 | 20.6717 | 0.8378  |
| YRI | TP53TG3 | 32531603 | 25.6618 | 22.1842 | 0.4875  |
| YRI | TP53TG3 | 32536603 | 9.1399  | 16.9743 | -1.4209 |
| YRI | TP53TG3 | 32541603 | 5.017   | 13.2769 | -1.893  |
| YRI | TP53TG3 | 32546603 | 6.1627  | 14.6214 | -1.769  |
| YRI | TP53TG3 | 32551603 | 7.2594  | 16.9743 | -1.762  |
| YRI | TP53TG3 | 32556603 | 7.4924  | 15.1256 | -1.5457 |
| YRI | TP53TG3 | 32561603 | 9.7802  | 19.4952 | -1.5427 |
| YRI | TP53TG3 | 32566603 | 10.3133 | 24.369  | -1.7991 |
| YRI | TP53TG3 | 32571603 | 8.929   | 24.5371 | -1.9845 |
| YRI | TP53TG3 | 32576603 | 10.3119 | 25.2093 | -1.8451 |
| YRI | TP53TG3 | 32581603 | 11.1587 | 24.369  | -1.6909 |
| YRI | TP53TG3 | 32586603 | 10.4308 | 20.8397 | -1.55   |
| YRI | TP53TG3 | 32591603 | 6.9682  | 14.6214 | -1.6005 |
| YRI | TP53TG3 | 32596603 | 5.5464  | 15.4617 | -1.9661 |
| YRI | TP53TG3 | 32601603 | 8.0557  | 19.3272 | -1.8048 |
| YRI | TP53TG3 | 32606603 | 9.2118  | 19.8313 | -1.6588 |
| YRI | TP53TG3 | 32611603 | 7.4289  | 18.823  | -1.8714 |
| YRI | TP53TG3 | 32616603 | 7.6808  | 19.4952 | -1.876  |
| YRI | TP53TG3 | 32621603 | 9.2035  | 21.1758 | -1.7555 |
| YRI | TP53TG3 | 32626603 | 9.333   | 21.8481 | -1.7805 |
| YRI | TP53TG3 | 32631603 | 9.7993  | 19.9994 | -1.5804 |
| YRI | TP53TG3 | 32636603 | 10.0234 | 15.4617 | -1.0784 |
| YRI | TP53TG3 | 32641603 | 15.929  | 18.6549 | -0.4516 |
| YRI | TP53TG3 | 32646603 | 14.6447 | 19.9994 | -0.8296 |
| YRI | TP53TG3 | 32651603 | 11.4728 | 20.3355 | -1.3513 |
| YRI | TP53TG3 | 32656603 | 9.8917  | 17.9827 | -1.3885 |
| YRI | TP53TG3 | 32661603 | 2.7152  | 7.8989  | -1.9285 |
| YRI | TP53TG3 | 32666603 | 0.6261  | 2.1848  | -1.7501 |
| YRI | TP53TG3 | 32671603 | 0.0456  | 0.1681  | -0.7282 |
| YRI | TP53TG3 | 32676603 | 0       | 0       | 0       |
| YRI | TP53TG3 | 32681603 | 0.0367  | 0.1681  | -0.7811 |
| YRI | TP53TG3 | 32686603 | 0.2241  | 0.5042  | -0.8803 |
| YRI | TP53TG3 | 32691603 | 0.4956  | 1.0084  | -1.0224 |
| YRI | TP53TG3 | 32696603 | 0.4071  | 1.1764  | -1.3759 |

## 2\_TajimasD\_data

|     |         |          |        |        |         |
|-----|---------|----------|--------|--------|---------|
| YRI | TP53TG3 | 32701603 | 0.3174 | 0.8403 | -1.181  |
| YRI | TP53TG3 | 32706603 | 0.2185 | 0.3361 | -0.4721 |
| YRI | TP53TG3 | 32711603 | 0      | 0      | 0       |
| YRI | TP53TG3 | 32716603 | 0.0552 | 0.5042 | -1.4111 |
| YRI | TP53TG3 | 32721603 | 0.0552 | 0.5042 | -1.4111 |
| YRI | TP53TG3 | 32726603 | 0      | 0      | 0       |
| YRI | TP53TG3 | 32731603 | 0      | 0      | 0       |
| YRI | TP53TG3 | 32736603 | 0      | 0      | 0       |
| YRI | TP53TG3 | 32741603 | 0      | 0      | 0       |
| YRI | TP53TG3 | 32746603 | 0      | 0      | 0       |
| CEU | TP53TG3 | 32178528 | 2.0629 | 5.1169 | -1.6904 |
| CEU | TP53TG3 | 32183528 | 1.3669 | 3.7524 | -1.7282 |
| CEU | TP53TG3 | 32188528 | 1.6157 | 1.8762 | -0.3317 |
| CEU | TP53TG3 | 32193528 | 1.7149 | 2.3879 | -0.7087 |
| CEU | TP53TG3 | 32198528 | 0.3063 | 1.3645 | -1.7119 |
| CEU | TP53TG3 | 32203528 | 0.3673 | 2.2173 | -2.0668 |
| CEU | TP53TG3 | 32208528 | 0.9452 | 2.8996 | -1.7577 |
| CEU | TP53TG3 | 32213528 | 1.6823 | 3.0701 | -1.1904 |
| CEU | TP53TG3 | 32218528 | 1.7834 | 3.2407 | -1.195  |
| CEU | TP53TG3 | 32223528 | 1.8832 | 3.0701 | -1.0181 |
| CEU | TP53TG3 | 32228528 | 1.0072 | 1.5351 | -0.7828 |
| CEU | TP53TG3 | 32233528 | 0.4698 | 0.8528 | -0.8625 |
| CEU | TP53TG3 | 32238528 | 0.7289 | 2.3879 | -1.7471 |
| CEU | TP53TG3 | 32243528 | 0.7737 | 2.8996 | -1.9119 |
| CEU | TP53TG3 | 32248528 | 1.6733 | 3.2407 | -1.2852 |
| CEU | TP53TG3 | 32253528 | 1.8303 | 2.5584 | -0.7253 |
| CEU | TP53TG3 | 32258528 | 1.1464 | 2.5584 | -1.4066 |
| CEU | TP53TG3 | 32263528 | 1.3084 | 4.9463 | -2.0747 |
| CEU | TP53TG3 | 32268528 | 1.6706 | 4.2641 | -1.6836 |
| CEU | TP53TG3 | 32273528 | 4.5558 | 5.9697 | -0.6824 |
| CEU | TP53TG3 | 32278528 | 3.9687 | 7.1636 | -1.3078 |
| CEU | TP53TG3 | 32283528 | 0.2801 | 2.8996 | -2.3558 |
| CEU | TP53TG3 | 32288528 | 1.3443 | 3.5818 | -1.6864 |
| CEU | TP53TG3 | 32293528 | 5.1309 | 7.6753 | -0.978  |
| CEU | TP53TG3 | 32298528 | 4.9874 | 6.3108 | -0.6076 |
| CEU | TP53TG3 | 32303528 | 3.18   | 2.729  | 0.4263  |
| CEU | TP53TG3 | 32308528 | 2.1501 | 2.0467 | 0.123   |
| CEU | TP53TG3 | 32313528 | 2.2795 | 3.2407 | -0.7882 |
| CEU | TP53TG3 | 32318528 | 5.8866 | 6.6519 | -0.3351 |
| CEU | TP53TG3 | 32323528 | 5.2397 | 6.6519 | -0.6183 |
| CEU | TP53TG3 | 32328528 | 3.242  | 4.9463 | -0.972  |
| CEU | TP53TG3 | 32333528 | 2.8268 | 3.5818 | -0.569  |
| CEU | TP53TG3 | 32338528 | 1.6714 | 3.2407 | -1.2868 |
| CEU | TP53TG3 | 32343528 | 4.424  | 6.6519 | -0.9754 |
| CEU | TP53TG3 | 32348528 | 5.0186 | 6.1402 | -0.5278 |
| CEU | TP53TG3 | 32353528 | 4.0179 | 5.458  | -0.7529 |
| CEU | TP53TG3 | 32358528 | 4.2373 | 6.8225 | -1.1062 |
| CEU | TP53TG3 | 32363528 | 4.4785 | 7.5047 | -1.1873 |
| CEU | TP53TG3 | 32368528 | 5.4758 | 7.8459 | -0.8928 |

## 2\_TajimasD\_data

|     |         |          |         |         |         |
|-----|---------|----------|---------|---------|---------|
| CEU | TP53TG3 | 32373528 | 3.1643  | 6.6519  | -1.5269 |
| CEU | TP53TG3 | 32378528 | 3.2329  | 8.5281  | -1.8476 |
| CEU | TP53TG3 | 32383528 | 5.4022  | 9.3809  | -1.271  |
| CEU | TP53TG3 | 32388528 | 5.7159  | 9.0398  | -1.099  |
| CEU | TP53TG3 | 32393528 | 6.0575  | 8.8692  | -0.9461 |
| CEU | TP53TG3 | 32398528 | 7.2375  | 8.187   | -0.344  |
| CEU | TP53TG3 | 32403528 | 6.3632  | 9.5515  | -1.0016 |
| CEU | TP53TG3 | 32408528 | 4.6116  | 8.187   | -1.2953 |
| CEU | TP53TG3 | 32413528 | 5.8229  | 5.9697  | -0.0708 |
| CEU | TP53TG3 | 32418528 | 9.8212  | 8.6987  | 0.3846  |
| CEU | TP53TG3 | 32423528 | 10.6462 | 10.7454 | -0.0279 |
| CEU | TP53TG3 | 32428528 | 7.1783  | 8.8692  | -0.569  |
| CEU | TP53TG3 | 32433528 | 6.5269  | 7.3342  | -0.3235 |
| CEU | TP53TG3 | 32438528 | 5.7027  | 6.3108  | -0.2792 |
| CEU | TP53TG3 | 32443528 | 2.705   | 6.4814  | -1.6926 |
| CEU | TP53TG3 | 32448528 | 3.5127  | 9.3809  | -1.8747 |
| CEU | TP53TG3 | 32453528 | 5.7809  | 10.2337 | -1.3118 |
| CEU | TP53TG3 | 32458528 | 5.1791  | 7.1636  | -0.8124 |
| CEU | TP53TG3 | 32463528 | 4.8716  | 6.4814  | -0.7215 |
| CEU | TP53TG3 | 32468528 | 8.8077  | 9.3809  | -0.1831 |
| CEU | TP53TG3 | 32473528 | 10.3657 | 11.5982 | -0.3229 |
| CEU | TP53TG3 | 32478528 | 8.8466  | 12.9627 | -0.971  |
| CEU | TP53TG3 | 32483528 | 8.5224  | 15.1801 | -1.3519 |
| CEU | TP53TG3 | 32488528 | 7.6271  | 14.1567 | -1.417  |
| CEU | TP53TG3 | 32493528 | 4.9645  | 9.0398  | -1.3474 |
| CEU | TP53TG3 | 32498528 | 5.1185  | 7.6753  | -0.9828 |
| CEU | TP53TG3 | 32503528 | 9.7654  | 11.5982 | -0.4802 |
| CEU | TP53TG3 | 32508528 | 9.8483  | 12.1099 | -0.569  |
| CEU | TP53TG3 | 32513528 | 9.1995  | 10.4043 | -0.3495 |
| CEU | TP53TG3 | 32518528 | 7.9386  | 10.5749 | -0.7532 |
| CEU | TP53TG3 | 32523528 | 13.0921 | 13.1333 | -0.0096 |
| CEU | TP53TG3 | 32528528 | 28.105  | 17.3974 | 1.9087  |
| CEU | TP53TG3 | 32533528 | 19.7915 | 14.6684 | 1.0749  |
| CEU | TP53TG3 | 32538528 | 2.8417  | 9.5515  | -2.1079 |
| CEU | TP53TG3 | 32543528 | 1.6611  | 8.3576  | -2.3804 |
| CEU | TP53TG3 | 32548528 | 1.7149  | 8.187   | -2.3447 |
| CEU | TP53TG3 | 32553528 | 4.3838  | 10.4043 | -1.7465 |
| CEU | TP53TG3 | 32558528 | 5.8623  | 11.0866 | -1.4281 |
| CEU | TP53TG3 | 32563528 | 4.1373  | 10.2337 | -1.796  |
| CEU | TP53TG3 | 32568528 | 3.1793  | 10.5749 | -2.1131 |
| CEU | TP53TG3 | 32573528 | 3.4993  | 10.0632 | -1.9643 |
| CEU | TP53TG3 | 32578528 | 5.8627  | 10.4043 | -1.3175 |
| CEU | TP53TG3 | 32583528 | 7.1745  | 11.9394 | -1.2148 |
| CEU | TP53TG3 | 32588528 | 6.4711  | 11.7688 | -1.3691 |
| CEU | TP53TG3 | 32593528 | 6.1971  | 10.0632 | -1.157  |
| CEU | TP53TG3 | 32598528 | 6.4354  | 11.0866 | -1.2714 |
| CEU | TP53TG3 | 32603528 | 5.2076  | 11.0866 | -1.607  |
| CEU | TP53TG3 | 32608528 | 6.0641  | 10.2337 | -1.2284 |
| CEU | TP53TG3 | 32613528 | 6.6052  | 11.7688 | -1.3344 |

## 2\_TajimasD\_data

|     |         |          |         |         |         |
|-----|---------|----------|---------|---------|---------|
| CEU | TP53TG3 | 32618528 | 5.0336  | 11.7688 | -1.7406 |
| CEU | TP53TG3 | 32623528 | 4.5865  | 10.916  | -1.7555 |
| CEU | TP53TG3 | 32628528 | 6.6848  | 10.2337 | -1.0455 |
| CEU | TP53TG3 | 32633528 | 7.934   | 9.2104  | -0.4148 |
| CEU | TP53TG3 | 32638528 | 8.8559  | 11.2571 | -0.647  |
| CEU | TP53TG3 | 32643528 | 10.8001 | 12.1099 | -0.3295 |
| CEU | TP53TG3 | 32648528 | 8.526   | 11.4277 | -0.7709 |
| CEU | TP53TG3 | 32653528 | 8.2533  | 12.1099 | -0.9702 |
| CEU | TP53TG3 | 32658528 | 5.564   | 8.0164  | -0.9058 |
| CEU | TP53TG3 | 32663528 | 0.5832  | 2.729   | -2.0282 |
| CEU | TP53TG3 | 32668528 | 0.0996  | 0.6822  | -1.5213 |
| CEU | TP53TG3 | 32673528 | 0       | 0       | 0       |
| CEU | TP53TG3 | 32678528 | 0       | 0       | 0       |
| CEU | TP53TG3 | 32683528 | 0.3191  | 0.3411  | -0.0882 |
| CEU | TP53TG3 | 32688528 | 0.3191  | 0.5117  | -0.604  |
| CEU | TP53TG3 | 32693528 | 0.3294  | 0.6822  | -0.9213 |
| CEU | TP53TG3 | 32698528 | 0.5222  | 0.8528  | -0.7445 |
| CEU | TP53TG3 | 32703528 | 0.1927  | 0.3411  | -0.5949 |
| CEU | TP53TG3 | 32708528 | 0       | 0       | 0       |
| CEU | TP53TG3 | 32713528 | 0       | 0       | 0       |
| CEU | TP53TG3 | 32718528 | 0       | 0       | 0       |
| CEU | TP53TG3 | 32723528 | 0       | 0       | 0       |
| CEU | TP53TG3 | 32728528 | 0       | 0       | 0       |
| CEU | TP53TG3 | 32733528 | 0       | 0       | 0       |
| CEU | TP53TG3 | 32738528 | 0.0101  | 0.1706  | -0.9534 |
| CEU | TP53TG3 | 32743528 | 0.0101  | 0.1706  | -0.9534 |
| CEU | TP53TG3 | 32748528 | 0.0101  | 0.1706  | -0.9534 |
| CEU | TP53TG3 | 32753528 | 0.0101  | 0.1706  | -0.9534 |
| CEU | TP53TG3 | 32758528 | 0       | 0       | 0       |
| CEU | TP53TG3 | 32763528 | 0       | 0       | 0       |
| CEU | TP53TG3 | 32768528 | 0.0101  | 0.1706  | -0.9534 |
| CEU | TP53TG3 | 32773528 | 0.0101  | 0.1706  | -0.9534 |
| CEU | TP53TG3 | 32778528 | 0       | 0       | 0       |
| CEU | TP53TG3 | 32783528 | 0.0301  | 0.3411  | -1.2467 |
| CEU | TP53TG3 | 32788528 | 0.0301  | 0.3411  | -1.2467 |
| CEU | TP53TG3 | 32793528 | 0       | 0       | 0       |
| CEU | TP53TG3 | 32798528 | 0.6232  | 0.5117  | 0.3497  |
| CEU | TP53TG3 | 32803528 | 0.6232  | 0.5117  | 0.3497  |
| CEU | TP53TG3 | 32808528 | 0.0303  | 0.5117  | -1.5098 |
| CEU | TP53TG3 | 32813528 | 1.7786  | 2.729   | -0.8983 |
| CEU | TP53TG3 | 32818528 | 3.7003  | 6.6519  | -1.2923 |
| CEU | TP53TG3 | 32823528 | 4.6075  | 7.1636  | -1.0463 |
| CEU | TP53TG3 | 32828528 | 4.8829  | 5.9697  | -0.5245 |
| CEU | TP53TG3 | 32833528 | 4.9798  | 7.1636  | -0.8939 |
| CEU | TP53TG3 | 32838528 | 4.5935  | 7.5047  | -1.1422 |
| CEU | TP53TG3 | 32843528 | 5.3888  | 8.0164  | -0.9705 |
| CEU | TP53TG3 | 32848528 | 4.1977  | 7.8459  | -1.3743 |
| CEU | TP53TG3 | 32853528 | 4.5613  | 8.3576  | -1.3495 |
| CEU | TP53TG3 | 32858528 | 4.8392  | 6.6519  | -0.7936 |

## 2\_TajimasD\_data

|     |         |          |        |        |         |
|-----|---------|----------|--------|--------|---------|
| CEU | TP53TG3 | 32863528 | 1.0957 | 2.5584 | -1.4571 |
| CEU | TP53TG3 | 32868528 | 1.3267 | 2.2173 | -0.995  |
| CEU | TP53TG3 | 32873528 | 1.7568 | 2.8996 | -1.0278 |
| CEU | TP53TG3 | 32878528 | 1.7788 | 3.0701 | -1.1077 |
| CEU | TP53TG3 | 32883528 | 1.4677 | 3.5818 | -1.5934 |
| CEU | TP53TG3 | 32888528 | 1.109  | 4.9463 | -2.1884 |
| CEU | TP53TG3 | 32893528 | 2.8771 | 4.9463 | -1.1801 |
| CEU | TP53TG3 | 32898528 | 3.781  | 3.9229 | -0.099  |
| CEU | TP53TG3 | 32903528 | 2.2462 | 3.2407 | -0.8155 |
| CEU | TP53TG3 | 32908528 | 1.3166 | 4.9463 | -2.07   |
| CEU | TP53TG3 | 32913528 | 1.2546 | 5.9697 | -2.2756 |
| CEU | TP53TG3 | 32918528 | 1.0853 | 4.2641 | -2.0635 |
| CEU | TP53TG3 | 32923528 | 0.9425 | 3.7524 | -2.0357 |
| CEU | TP53TG3 | 32928528 | 2.6209 | 5.7991 | -1.5741 |
| CEU | TP53TG3 | 32933528 | 2.4758 | 5.6286 | -1.6037 |
| CEU | TP53TG3 | 32938528 | 0.5055 | 3.2407 | -2.2428 |
| CEU | TP53TG3 | 32943528 | 1.7757 | 4.6052 | -1.7179 |
| CEU | TP53TG3 | 32948528 | 2.9674 | 6.4814 | -1.575  |
| CEU | TP53TG3 | 32953528 | 3.478  | 6.6519 | -1.3896 |
| CEU | TP53TG3 | 32958528 | 2.4477 | 6.9931 | -1.9019 |
| CEU | TP53TG3 | 32963528 | 1.2055 | 5.1169 | -2.165  |
| CEU | TP53TG3 | 32968528 | 2.0392 | 2.5584 | -0.5172 |
| CEU | TP53TG3 | 32973528 | 1.8103 | 3.2407 | -1.1729 |
| CEU | TP53TG3 | 32978528 | 0.5502 | 2.5584 | -2.0005 |
| CEU | TP53TG3 | 32983528 | 0.6423 | 1.3645 | -1.1684 |
| CEU | TP53TG3 | 32988528 | 0.7196 | 1.7056 | -1.3504 |
| CEU | TP53TG3 | 32993528 | 0.1476 | 0.8528 | -1.5881 |
| CEU | TP53TG3 | 32998528 | 0.5133 | 2.0467 | -1.8246 |
| CEU | TP53TG3 | 33003528 | 1.2247 | 3.5818 | -1.7765 |
| CEU | TP53TG3 | 33008528 | 0.907  | 2.2173 | -1.4638 |
| CEU | TP53TG3 | 33013528 | 0.3148 | 1.8762 | -1.9879 |
| CEU | TP53TG3 | 33018528 | 0.309  | 2.8996 | -2.3298 |
| CEU | TP53TG3 | 33023528 | 0.954  | 3.5818 | -1.9806 |
| CEU | TP53TG3 | 33028528 | 1.3034 | 2.729  | -1.3475 |
| CEU | TP53TG3 | 33033528 | 0.8576 | 1.8762 | -1.2969 |
| CEU | TP53TG3 | 33038528 | 1.3972 | 3.5818 | -1.6465 |
| CEU | TP53TG3 | 33043528 | 1.3828 | 3.2407 | -1.5234 |
| CEU | TP53TG3 | 33048528 | 0.6073 | 1.8762 | -1.6155 |
| CEU | TP53TG3 | 33053528 | 0.6955 | 2.8996 | -1.9822 |
| CEU | TP53TG3 | 33058528 | 1.2676 | 3.9229 | -1.852  |
| CEU | TP53TG3 | 33063528 | 1.0367 | 4.2641 | -2.095  |
| CEU | TP53TG3 | 33068528 | 2.4376 | 6.3108 | -1.7783 |
| CEU | TP53TG3 | 33073528 | 2.9392 | 5.7991 | -1.4165 |
| CEU | TP53TG3 | 33078528 | 0.9206 | 2.5584 | -1.6315 |
| CEU | TP53TG3 | 33083528 | 0.2579 | 1.0234 | -1.5211 |
| CEU | TP53TG3 | 33088528 | 0.8306 | 0.8528 | -0.05   |
| CEU | TP53TG3 | 33093528 | 0.8306 | 0.8528 | -0.05   |
| CEU | TP53TG3 | 33098528 | 0      | 0      | 0       |
| CEU | TP53TG3 | 33103528 | 0.2983 | 0.1706 | 0.7586  |

## 2\_TajimasD\_data

|     |         |          |        |        |         |
|-----|---------|----------|--------|--------|---------|
| CEU | TP53TG3 | 33108528 | 0.4482 | 0.3411 | 0.4293  |
| CEU | TP53TG3 | 33113528 | 0.2002 | 0.6822 | -1.2586 |
| CEU | TP53TG3 | 33118528 | 0.1189 | 0.8528 | -1.6527 |
| CEU | TP53TG3 | 33123528 | 0.0888 | 0.6822 | -1.5495 |
| CEU | TP53TG3 | 33128528 | 0.0202 | 0.3411 | -1.2864 |
| CEU | TP53TG3 | 33133528 | 0      | 0      | 0       |
| CEU | TP53TG3 | 33138528 | 0.7225 | 0.3411 | 1.5289  |
| CEU | TP53TG3 | 33143528 | 0.7326 | 0.5117 | 0.6928  |
| CEU | TP53TG3 | 33148528 | 0.0101 | 0.1706 | -0.9534 |
| CEU | TP53TG3 | 33153528 | 0      | 0      | 0       |
| CEU | TP53TG3 | 33158528 | 0      | 0      | 0       |
| CEU | TP53TG3 | 33163528 | 0      | 0      | 0       |
| CEU | TP53TG3 | 33168528 | 0.059  | 0.1706 | -0.6629 |
| CHB | TP53TG3 | 32178528 | 1.7973 | 8.1319 | -2.3025 |
| CHB | TP53TG3 | 32183528 | 1.6143 | 5.9295 | -2.089  |
| CHB | TP53TG3 | 32188528 | 1.1913 | 3.0495 | -1.5981 |
| CHB | TP53TG3 | 32193528 | 1.2204 | 3.3883 | -1.7073 |
| CHB | TP53TG3 | 32198528 | 0.1165 | 1.8636 | -2.2291 |
| CHB | TP53TG3 | 32203528 | 0.5846 | 2.7106 | -2.0145 |
| CHB | TP53TG3 | 32208528 | 1.5014 | 3.8965 | -1.6752 |
| CHB | TP53TG3 | 32213528 | 1.9343 | 4.913  | -1.7038 |
| CHB | TP53TG3 | 32218528 | 2.639  | 4.7436 | -1.2415 |
| CHB | TP53TG3 | 32223528 | 2.7214 | 3.5577 | -0.632  |
| CHB | TP53TG3 | 32228528 | 1.032  | 1.3553 | -0.524  |
| CHB | TP53TG3 | 32233528 | 0.4786 | 0.6777 | -0.5205 |
| CHB | TP53TG3 | 32238528 | 0.957  | 1.1859 | -0.4086 |
| CHB | TP53TG3 | 32243528 | 0.7253 | 2.2024 | -1.654  |
| CHB | TP53TG3 | 32248528 | 1.4053 | 3.8965 | -1.7424 |
| CHB | TP53TG3 | 32253528 | 1.714  | 3.2189 | -1.2372 |
| CHB | TP53TG3 | 32258528 | 1.0698 | 2.5412 | -1.4693 |
| CHB | TP53TG3 | 32263528 | 0.8763 | 3.2189 | -1.9259 |
| CHB | TP53TG3 | 32268528 | 1.1847 | 3.5577 | -1.7934 |
| CHB | TP53TG3 | 32273528 | 3.5903 | 8.3013 | -1.6802 |
| CHB | TP53TG3 | 32278528 | 3.2024 | 9.9955 | -2.0398 |
| CHB | TP53TG3 | 32283528 | 0.5399 | 4.2354 | -2.4058 |
| CHB | TP53TG3 | 32288528 | 1.4399 | 3.7271 | -1.6616 |
| CHB | TP53TG3 | 32293528 | 6.0655 | 8.4708 | -0.842  |
| CHB | TP53TG3 | 32298528 | 5.0411 | 6.946  | -0.7996 |
| CHB | TP53TG3 | 32303528 | 1.8176 | 2.2024 | -0.4309 |
| CHB | TP53TG3 | 32308528 | 2.5781 | 2.3718 | 0.2178  |
| CHB | TP53TG3 | 32313528 | 3.0944 | 4.2354 | -0.7428 |
| CHB | TP53TG3 | 32318528 | 4.5928 | 5.7601 | -0.5799 |
| CHB | TP53TG3 | 32323528 | 4.0213 | 6.6072 | -1.1358 |
| CHB | TP53TG3 | 32328528 | 3.1971 | 5.9295 | -1.3228 |
| CHB | TP53TG3 | 32333528 | 2.8438 | 3.8965 | -0.7363 |
| CHB | TP53TG3 | 32338528 | 1.2717 | 2.8801 | -1.4501 |
| CHB | TP53TG3 | 32343528 | 4.1077 | 5.4213 | -0.6888 |
| CHB | TP53TG3 | 32348528 | 5.092  | 6.0989 | -0.4753 |
| CHB | TP53TG3 | 32353528 | 3.4097 | 5.5907 | -1.1128 |



## 2\_TajimasD\_data

|     |         |          |         |         |         |
|-----|---------|----------|---------|---------|---------|
| CHB | TP53TG3 | 32358528 | 3.4472  | 5.7601  | -1.1491 |
| CHB | TP53TG3 | 32363528 | 3.9734  | 5.7601  | -0.8877 |
| CHB | TP53TG3 | 32368528 | 4.7364  | 6.946   | -0.9275 |
| CHB | TP53TG3 | 32373528 | 3.3668  | 8.3013  | -1.7599 |
| CHB | TP53TG3 | 32378528 | 2.7579  | 11.8591 | -2.3285 |
| CHB | TP53TG3 | 32383528 | 3.9551  | 14.0615 | -2.201  |
| CHB | TP53TG3 | 32388528 | 5.2669  | 12.7061 | -1.7834 |
| CHB | TP53TG3 | 32393528 | 6.2159  | 9.4872  | -1.0312 |
| CHB | TP53TG3 | 32398528 | 7.6908  | 7.7931  | -0.0387 |
| CHB | TP53TG3 | 32403528 | 6.126   | 7.4543  | -0.5229 |
| CHB | TP53TG3 | 32408528 | 4.0605  | 7.2848  | -1.2961 |
| CHB | TP53TG3 | 32413528 | 5.0339  | 7.7931  | -1.0428 |
| CHB | TP53TG3 | 32418528 | 8.2438  | 11.1814 | -0.7943 |
| CHB | TP53TG3 | 32423528 | 9.4979  | 10.5037 | -0.2884 |
| CHB | TP53TG3 | 32428528 | 6.3566  | 6.0989  | 0.1216  |
| CHB | TP53TG3 | 32433528 | 5.6815  | 7.1154  | -0.5889 |
| CHB | TP53TG3 | 32438528 | 4.9223  | 7.2848  | -0.9496 |
| CHB | TP53TG3 | 32443528 | 1.9475  | 5.9295  | -1.9277 |
| CHB | TP53TG3 | 32448528 | 2.5287  | 8.4708  | -2.0802 |
| CHB | TP53TG3 | 32453528 | 4.5151  | 10.5037 | -1.7169 |
| CHB | TP53TG3 | 32458528 | 5.2368  | 10.5037 | -1.51   |
| CHB | TP53TG3 | 32463528 | 6.1595  | 10.5037 | -1.2455 |
| CHB | TP53TG3 | 32468528 | 9.633   | 13.045  | -0.7978 |
| CHB | TP53TG3 | 32473528 | 10.0879 | 12.3673 | -0.5606 |
| CHB | TP53TG3 | 32478528 | 7.9794  | 11.5202 | -0.9309 |
| CHB | TP53TG3 | 32483528 | 7.9162  | 17.4498 | -1.6897 |
| CHB | TP53TG3 | 32488528 | 7.1329  | 14.7391 | -1.584  |
| CHB | TP53TG3 | 32493528 | 4.7097  | 7.9625  | -1.2054 |
| CHB | TP53TG3 | 32498528 | 5.2854  | 8.1319  | -1.0346 |
| CHB | TP53TG3 | 32503528 | 9.1597  | 12.0285 | -0.7242 |
| CHB | TP53TG3 | 32508528 | 8.8386  | 12.1979 | -0.8369 |
| CHB | TP53TG3 | 32513528 | 9.1555  | 10.5037 | -0.3865 |
| CHB | TP53TG3 | 32518528 | 8.2766  | 12.0285 | -0.9472 |
| CHB | TP53TG3 | 32523528 | 13.0916 | 14.4003 | -0.2786 |
| CHB | TP53TG3 | 32528528 | 28.1034 | 17.958  | 1.7492  |
| CHB | TP53TG3 | 32533528 | 19.2096 | 15.5862 | 0.7154  |
| CHB | TP53TG3 | 32538528 | 2.5182  | 10.3343 | -2.2752 |
| CHB | TP53TG3 | 32543528 | 1.943   | 10.3343 | -2.4426 |
| CHB | TP53TG3 | 32548528 | 1.8722  | 12.1979 | -2.5726 |
| CHB | TP53TG3 | 32553528 | 3.5884  | 9.8261  | -1.9031 |
| CHB | TP53TG3 | 32558528 | 4.5374  | 7.7931  | -1.2305 |
| CHB | TP53TG3 | 32563528 | 3.0158  | 9.3178  | -2.02   |
| CHB | TP53TG3 | 32568528 | 2.4685  | 8.8096  | -2.1409 |
| CHB | TP53TG3 | 32573528 | 2.5418  | 9.1484  | -2.154  |
| CHB | TP53TG3 | 32578528 | 4.7891  | 12.0285 | -1.8276 |
| CHB | TP53TG3 | 32583528 | 6.5909  | 13.045  | -1.5092 |
| CHB | TP53TG3 | 32588528 | 5.1192  | 10.1649 | -1.4916 |
| CHB | TP53TG3 | 32593528 | 4.0209  | 9.3178  | -1.6979 |
| CHB | TP53TG3 | 32598528 | 5.1395  | 11.3508 | -1.6559 |

## 2\_TajimasD\_data

|     |         |          |         |         |         |
|-----|---------|----------|---------|---------|---------|
| CHB | TP53TG3 | 32603528 | 4.8081  | 12.7061 | -1.8933 |
| CHB | TP53TG3 | 32608528 | 5.0939  | 12.8755 | -1.8422 |
| CHB | TP53TG3 | 32613528 | 5.3655  | 11.1814 | -1.5726 |
| CHB | TP53TG3 | 32618528 | 4.732   | 13.2144 | -1.9594 |
| CHB | TP53TG3 | 32623528 | 4.8449  | 15.4168 | -2.1093 |
| CHB | TP53TG3 | 32628528 | 5.8094  | 13.3838 | -1.7287 |
| CHB | TP53TG3 | 32633528 | 7.2295  | 11.8591 | -1.1845 |
| CHB | TP53TG3 | 32638528 | 8.7391  | 11.6896 | -0.7652 |
| CHB | TP53TG3 | 32643528 | 10.1067 | 11.6896 | -0.4105 |
| CHB | TP53TG3 | 32648528 | 7.3403  | 10.8426 | -0.9747 |
| CHB | TP53TG3 | 32653528 | 6.7849  | 11.8591 | -1.2982 |
| CHB | TP53TG3 | 32658528 | 4.5338  | 8.3013  | -1.3437 |
| CHB | TP53TG3 | 32663528 | 0.2937  | 1.6942  | -1.922  |
| CHB | TP53TG3 | 32668528 | 0.0097  | 0.1694  | -0.949  |
| CHB | TP53TG3 | 32673528 | 0.0097  | 0.1694  | -0.949  |
| CHB | TP53TG3 | 32678528 | 0.0097  | 0.1694  | -0.949  |
| CHB | TP53TG3 | 32683528 | 0.0097  | 0.3388  | -1.3201 |
| CHB | TP53TG3 | 32688528 | 0.0194  | 0.5082  | -1.5344 |
| CHB | TP53TG3 | 32693528 | 0.2012  | 0.6777  | -1.2457 |
| CHB | TP53TG3 | 32698528 | 0.6638  | 1.0165  | -0.7019 |
| CHB | TP53TG3 | 32703528 | 0.4723  | 0.5082  | -0.1127 |
| CHB | TP53TG3 | 32708528 | 0       | 0       | 0       |
| CHB | TP53TG3 | 32713528 | 0.0194  | 0.1694  | -0.8913 |
| CHB | TP53TG3 | 32718528 | 0.0577  | 0.3388  | -1.1276 |
| CHB | TP53TG3 | 32723528 | 0.0577  | 0.3388  | -1.1276 |
| CHB | TP53TG3 | 32728528 | 0.0194  | 0.1694  | -0.8913 |
| CHB | TP53TG3 | 32733528 | 0       | 0       | 0       |
| CHB | TP53TG3 | 32738528 | 0       | 0       | 0       |
| CHB | TP53TG3 | 32743528 | 0       | 0       | 0       |
| CHB | TP53TG3 | 32748528 | 0.0097  | 0.1694  | -0.949  |
| CHB | TP53TG3 | 32753528 | 0.0097  | 0.1694  | -0.949  |
| CHB | TP53TG3 | 32758528 | 0       | 0       | 0       |
| CHB | TP53TG3 | 32763528 | 0       | 0       | 0       |
| CHB | TP53TG3 | 32768528 | 0       | 0       | 0       |
| CHB | TP53TG3 | 32773528 | 0       | 0       | 0       |
| CHB | TP53TG3 | 32778528 | 0       | 0       | 0       |
| CHB | TP53TG3 | 32783528 | 0.1563  | 0.3388  | -0.7321 |
| CHB | TP53TG3 | 32788528 | 0.1563  | 0.3388  | -0.7321 |
| CHB | TP53TG3 | 32793528 | 0       | 0       | 0       |
| CHB | TP53TG3 | 32798528 | 0.4658  | 0.8471  | -0.8598 |
| CHB | TP53TG3 | 32803528 | 0.4658  | 0.8471  | -0.8598 |
| CHB | TP53TG3 | 32808528 | 0.0291  | 0.5082  | -1.504  |
| CHB | TP53TG3 | 32813528 | 1.4976  | 2.2024  | -0.7892 |
| CHB | TP53TG3 | 32818528 | 3.3764  | 7.4543  | -1.6052 |
| CHB | TP53TG3 | 32823528 | 3.8542  | 9.6567  | -1.7992 |
| CHB | TP53TG3 | 32828528 | 4.1448  | 7.4543  | -1.3027 |
| CHB | TP53TG3 | 32833528 | 5.2162  | 7.6237  | -0.9284 |
| CHB | TP53TG3 | 32838528 | 4.4721  | 6.0989  | -0.7679 |
| CHB | TP53TG3 | 32843528 | 5.0746  | 5.5907  | -0.2633 |

## 2\_TajimasD\_data

|     |         |          |        |        |         |
|-----|---------|----------|--------|--------|---------|
| CHB | TP53TG3 | 32848528 | 3.9526 | 6.7766 | -1.2122 |
| CHB | TP53TG3 | 32853528 | 4.3571 | 9.9955 | -1.6931 |
| CHB | TP53TG3 | 32858528 | 4.566  | 7.9625 | -1.2586 |
| CHB | TP53TG3 | 32863528 | 0.58   | 2.033  | -1.7327 |
| CHB | TP53TG3 | 32868528 | 0.9025 | 2.033  | -1.3481 |
| CHB | TP53TG3 | 32873528 | 1.4851 | 3.5577 | -1.5664 |
| CHB | TP53TG3 | 32878528 | 1.9351 | 5.9295 | -1.9337 |
| CHB | TP53TG3 | 32883528 | 1.4298 | 5.2519 | -2.0614 |
| CHB | TP53TG3 | 32888528 | 0.7114 | 3.7271 | -2.1908 |
| CHB | TP53TG3 | 32893528 | 2.8506 | 4.066  | -0.8196 |
| CHB | TP53TG3 | 32898528 | 3.7583 | 4.7436 | -0.5812 |
| CHB | TP53TG3 | 32903528 | 2.5489 | 5.2519 | -1.4578 |
| CHB | TP53TG3 | 32908528 | 1.297  | 5.2519 | -2.133  |
| CHB | TP53TG3 | 32913528 | 1.1432 | 6.2684 | -2.3605 |
| CHB | TP53TG3 | 32918528 | 1.87   | 6.946  | -2.1307 |
| CHB | TP53TG3 | 32923528 | 1.1424 | 5.4213 | -2.2437 |
| CHB | TP53TG3 | 32928528 | 1.9423 | 7.1154 | -2.1244 |
| CHB | TP53TG3 | 32933528 | 2.106  | 7.4543 | -2.1052 |
| CHB | TP53TG3 | 32938528 | 1.0756 | 6.946  | -2.4642 |
| CHB | TP53TG3 | 32943528 | 2.0145 | 7.1154 | -2.0948 |
| CHB | TP53TG3 | 32948528 | 2.8091 | 6.2684 | -1.5932 |
| CHB | TP53TG3 | 32953528 | 3.0855 | 8.6402 | -1.9094 |
| CHB | TP53TG3 | 32958528 | 1.8355 | 6.2684 | -2.0416 |
| CHB | TP53TG3 | 32963528 | 0.8409 | 1.8636 | -1.3048 |
| CHB | TP53TG3 | 32968528 | 1.8447 | 1.6942 | 0.2065  |
| CHB | TP53TG3 | 32973528 | 1.5403 | 2.033  | -0.5875 |
| CHB | TP53TG3 | 32978528 | 0.2541 | 1.0165 | -1.5172 |
| CHB | TP53TG3 | 32983528 | 0.5846 | 1.1859 | -1.0733 |
| CHB | TP53TG3 | 32988528 | 0.5846 | 1.1859 | -1.0733 |
| CHB | TP53TG3 | 32993528 | 0.0097 | 0.1694 | -0.949  |
| CHB | TP53TG3 | 32998528 | 0.842  | 2.3718 | -1.6148 |
| CHB | TP53TG3 | 33003528 | 1.2696 | 3.7271 | -1.7853 |
| CHB | TP53TG3 | 33008528 | 0.5717 | 2.5412 | -1.9667 |
| CHB | TP53TG3 | 33013528 | 0.9008 | 3.2189 | -1.9058 |
| CHB | TP53TG3 | 33018528 | 1.1076 | 4.066  | -1.9949 |
| CHB | TP53TG3 | 33023528 | 1.3556 | 4.4048 | -1.9187 |
| CHB | TP53TG3 | 33028528 | 1.5882 | 4.5742 | -1.8182 |
| CHB | TP53TG3 | 33033528 | 1.1176 | 3.7271 | -1.8957 |
| CHB | TP53TG3 | 33038528 | 1.0042 | 3.0495 | -1.759  |
| CHB | TP53TG3 | 33043528 | 0.5184 | 2.2024 | -1.8856 |
| CHB | TP53TG3 | 33048528 | 0.1544 | 1.6942 | -2.1132 |
| CHB | TP53TG3 | 33053528 | 0.9802 | 3.8965 | -2.0397 |
| CHB | TP53TG3 | 33058528 | 1.7929 | 4.913  | -1.7847 |
| CHB | TP53TG3 | 33063528 | 1.2204 | 3.2189 | -1.643  |
| CHB | TP53TG3 | 33068528 | 1.9968 | 3.7271 | -1.257  |
| CHB | TP53TG3 | 33073528 | 2.7744 | 6.4378 | -1.6472 |
| CHB | TP53TG3 | 33078528 | 1.5974 | 5.0825 | -1.9349 |
| CHB | TP53TG3 | 33083528 | 0.518  | 1.1859 | -1.1922 |
| CHB | TP53TG3 | 33088528 | 1.0651 | 0.6777 | 1.0128  |

## 2\_TajimasD\_data

|     |         |          |        |         |         |
|-----|---------|----------|--------|---------|---------|
| CHB | TP53TG3 | 33093528 | 1.0651 | 0.6777  | 1.0128  |
| CHB | TP53TG3 | 33098528 | 0      | 0       | 0       |
| CHB | TP53TG3 | 33103528 | 0.2747 | 0.3388  | -0.2571 |
| CHB | TP53TG3 | 33108528 | 0.3415 | 0.6777  | -0.8789 |
| CHB | TP53TG3 | 33113528 | 0.0668 | 0.3388  | -1.0911 |
| CHB | TP53TG3 | 33118528 | 0      | 0       | 0       |
| CHB | TP53TG3 | 33123528 | 0.0194 | 0.3388  | -1.2812 |
| CHB | TP53TG3 | 33128528 | 0.0194 | 0.3388  | -1.2812 |
| CHB | TP53TG3 | 33133528 | 0      | 0       | 0       |
| CHB | TP53TG3 | 33138528 | 0.6421 | 0.5082  | 0.4203  |
| CHB | TP53TG3 | 33143528 | 0.6421 | 0.5082  | 0.4203  |
| CHB | TP53TG3 | 33148528 | 0      | 0       | 0       |
| CHB | TP53TG3 | 33153528 | 0      | 0       | 0       |
| CHB | TP53TG3 | 33158528 | 0      | 0       | 0       |
| CHB | TP53TG3 | 33163528 | 0      | 0       | 0       |
| CHB | TP53TG3 | 33168528 | 0.0388 | 0.5082  | -1.4735 |
| YRI | TP53TG3 | 32178528 | 4.5112 | 8.7392  | -1.4332 |
| YRI | TP53TG3 | 32183528 | 3.6724 | 6.7225  | -1.3143 |
| YRI | TP53TG3 | 32188528 | 2.7195 | 4.5377  | -1.111  |
| YRI | TP53TG3 | 32193528 | 2.8736 | 5.7141  | -1.4164 |
| YRI | TP53TG3 | 32198528 | 0.6411 | 3.0251  | -2.0566 |
| YRI | TP53TG3 | 32203528 | 1.1053 | 3.6974  | -1.8893 |
| YRI | TP53TG3 | 32208528 | 2.2699 | 4.0335  | -1.1933 |
| YRI | TP53TG3 | 32213528 | 2.9063 | 4.3696  | -0.924  |
| YRI | TP53TG3 | 32218528 | 3.0005 | 7.5628  | -1.7662 |
| YRI | TP53TG3 | 32223528 | 3.2245 | 8.067   | -1.7671 |
| YRI | TP53TG3 | 32228528 | 1.5155 | 3.1932  | -1.3836 |
| YRI | TP53TG3 | 32233528 | 0.9421 | 1.8487  | -1.1596 |
| YRI | TP53TG3 | 32238528 | 1.3551 | 3.1932  | -1.5159 |
| YRI | TP53TG3 | 32243528 | 1.3196 | 3.0251  | -1.4713 |
| YRI | TP53TG3 | 32248528 | 2.5282 | 4.7057  | -1.289  |
| YRI | TP53TG3 | 32253528 | 2.7701 | 5.5461  | -1.4216 |
| YRI | TP53TG3 | 32258528 | 1.6867 | 4.2016  | -1.6428 |
| YRI | TP53TG3 | 32263528 | 1.3334 | 5.0419  | -2.0663 |
| YRI | TP53TG3 | 32268528 | 1.794  | 5.7141  | -1.9548 |
| YRI | TP53TG3 | 32273528 | 5.4316 | 11.9324 | -1.6479 |
| YRI | TP53TG3 | 32278528 | 5.8004 | 15.6298 | -1.9291 |
| YRI | TP53TG3 | 32283528 | 1.5678 | 7.3947  | -2.3025 |
| YRI | TP53TG3 | 32288528 | 2.2989 | 6.3864  | -1.8448 |
| YRI | TP53TG3 | 32293528 | 8.0355 | 13.445  | -1.2251 |
| YRI | TP53TG3 | 32298528 | 6.3233 | 10.0837 | -1.1161 |
| YRI | TP53TG3 | 32303528 | 1.8576 | 3.8654  | -1.409  |
| YRI | TP53TG3 | 32308528 | 1.6989 | 4.0335  | -1.5796 |
| YRI | TP53TG3 | 32313528 | 2.5451 | 4.7057  | -1.279  |
| YRI | TP53TG3 | 32318528 | 5.0844 | 6.2183  | -0.5242 |
| YRI | TP53TG3 | 32323528 | 4.3501 | 6.7225  | -1.0223 |
| YRI | TP53TG3 | 32328528 | 2.9324 | 6.0502  | -1.4772 |
| YRI | TP53TG3 | 32333528 | 2.6556 | 5.8822  | -1.5678 |
| YRI | TP53TG3 | 32338528 | 1.868  | 5.8822  | -1.9505 |

## 2\_TajimasD\_data

|     |         |          |         |         |         |
|-----|---------|----------|---------|---------|---------|
| YRI | TP53TG3 | 32343528 | 5.1376  | 9.0754  | -1.289  |
| YRI | TP53TG3 | 32348528 | 6.0792  | 10.5879 | -1.2786 |
| YRI | TP53TG3 | 32353528 | 4.0852  | 10.5879 | -1.8441 |
| YRI | TP53TG3 | 32358528 | 4.6637  | 11.2602 | -1.7659 |
| YRI | TP53TG3 | 32363528 | 5.1622  | 10.756  | -1.5632 |
| YRI | TP53TG3 | 32368528 | 5.471   | 9.9157  | -1.3401 |
| YRI | TP53TG3 | 32373528 | 4.9541  | 13.7811 | -1.9528 |
| YRI | TP53TG3 | 32378528 | 6.2849  | 19.9994 | -2.1249 |
| YRI | TP53TG3 | 32383528 | 8.4534  | 21.512  | -1.8858 |
| YRI | TP53TG3 | 32388528 | 9.9379  | 21.1758 | -1.6478 |
| YRI | TP53TG3 | 32393528 | 10.001  | 17.4785 | -1.3187 |
| YRI | TP53TG3 | 32398528 | 9.7587  | 14.1172 | -0.9424 |
| YRI | TP53TG3 | 32403528 | 8.8143  | 14.6214 | -1.2145 |
| YRI | TP53TG3 | 32408528 | 6.5391  | 13.7811 | -1.6022 |
| YRI | TP53TG3 | 32413528 | 6.7523  | 11.4282 | -1.2345 |
| YRI | TP53TG3 | 32418528 | 9.9894  | 12.6047 | -0.6296 |
| YRI | TP53TG3 | 32423528 | 11.1145 | 14.1172 | -0.6493 |
| YRI | TP53TG3 | 32428528 | 8.6942  | 12.1005 | -0.8522 |
| YRI | TP53TG3 | 32433528 | 8.1531  | 11.7644 | -0.9278 |
| YRI | TP53TG3 | 32438528 | 6.4881  | 11.0921 | -1.25   |
| YRI | TP53TG3 | 32443528 | 3.36    | 10.0837 | -1.9957 |
| YRI | TP53TG3 | 32448528 | 5.0038  | 13.1089 | -1.8801 |
| YRI | TP53TG3 | 32453528 | 7.6376  | 14.4534 | -1.4412 |
| YRI | TP53TG3 | 32458528 | 7.6792  | 12.6047 | -1.1857 |
| YRI | TP53TG3 | 32463528 | 7.9816  | 11.9324 | -1.0015 |
| YRI | TP53TG3 | 32468528 | 11.7059 | 16.302  | -0.8665 |
| YRI | TP53TG3 | 32473528 | 12.3374 | 16.4701 | -0.7715 |
| YRI | TP53TG3 | 32478528 | 10.7443 | 17.8146 | -1.2243 |
| YRI | TP53TG3 | 32483528 | 10.9115 | 23.6968 | -1.6814 |
| YRI | TP53TG3 | 32488528 | 9.9238  | 21.1758 | -1.6498 |
| YRI | TP53TG3 | 32493528 | 6.8364  | 14.7895 | -1.6453 |
| YRI | TP53TG3 | 32498528 | 6.7447  | 13.2769 | -1.4971 |
| YRI | TP53TG3 | 32503528 | 11.648  | 18.4868 | -1.1429 |
| YRI | TP53TG3 | 32508528 | 12.1587 | 19.8313 | -1.1985 |
| YRI | TP53TG3 | 32513528 | 11.8889 | 18.6549 | -1.1209 |
| YRI | TP53TG3 | 32518528 | 10.7524 | 19.1591 | -1.3575 |
| YRI | TP53TG3 | 32523528 | 15.0422 | 18.991  | -0.6431 |
| YRI | TP53TG3 | 32528528 | 29.829  | 21.68   | 1.168   |
| YRI | TP53TG3 | 32533528 | 22.4989 | 20.5036 | 0.3018  |
| YRI | TP53TG3 | 32538528 | 5.2556  | 15.1256 | -1.9986 |
| YRI | TP53TG3 | 32543528 | 4.9982  | 12.9408 | -1.865  |
| YRI | TP53TG3 | 32548528 | 6.7271  | 15.1256 | -1.7006 |
| YRI | TP53TG3 | 32553528 | 8.3949  | 17.1423 | -1.5716 |
| YRI | TP53TG3 | 32558528 | 8.8551  | 17.3104 | -1.505  |
| YRI | TP53TG3 | 32563528 | 9.5898  | 21.3439 | -1.7104 |
| YRI | TP53TG3 | 32568528 | 9.687   | 24.7051 | -1.8969 |
| YRI | TP53TG3 | 32573528 | 8.6515  | 24.201  | -2.0037 |
| YRI | TP53TG3 | 32578528 | 11.6025 | 25.8816 | -1.7239 |
| YRI | TP53TG3 | 32583528 | 11.9538 | 23.8648 | -1.5558 |

## 2\_TajimasD\_data

|     |         |          |         |         |         |
|-----|---------|----------|---------|---------|---------|
| YRI | TP53TG3 | 32588528 | 8.5344  | 17.3104 | -1.5621 |
| YRI | TP53TG3 | 32593528 | 5.8112  | 14.4534 | -1.8274 |
| YRI | TP53TG3 | 32598528 | 6.8114  | 17.4785 | -1.8812 |
| YRI | TP53TG3 | 32603528 | 8.1223  | 18.991  | -1.7699 |
| YRI | TP53TG3 | 32608528 | 8.172   | 18.991  | -1.7618 |
| YRI | TP53TG3 | 32613528 | 7.9001  | 19.1591 | -1.818  |
| YRI | TP53TG3 | 32618528 | 8.3665  | 19.8313 | -1.7908 |
| YRI | TP53TG3 | 32623528 | 9.2827  | 23.1926 | -1.8678 |
| YRI | TP53TG3 | 32628528 | 9.9414  | 22.5203 | -1.7379 |
| YRI | TP53TG3 | 32633528 | 10.4714 | 17.8146 | -1.2716 |
| YRI | TP53TG3 | 32638528 | 12.2163 | 16.302  | -0.7702 |
| YRI | TP53TG3 | 32643528 | 13.7163 | 17.3104 | -0.6397 |
| YRI | TP53TG3 | 32648528 | 12.0395 | 18.991  | -1.132  |
| YRI | TP53TG3 | 32653528 | 12.6852 | 22.0162 | -1.3177 |
| YRI | TP53TG3 | 32658528 | 8.0536  | 14.6214 | -1.3735 |
| YRI | TP53TG3 | 32663528 | 1.1016  | 4.2016  | -2.025  |
| YRI | TP53TG3 | 32668528 | 0.2009  | 1.1764  | -1.7447 |
| YRI | TP53TG3 | 32673528 | 0       | 0       | 0       |
| YRI | TP53TG3 | 32678528 | 0       | 0       | 0       |
| YRI | TP53TG3 | 32683528 | 0.0552  | 0.3361  | -1.1277 |
| YRI | TP53TG3 | 32688528 | 0.2241  | 0.5042  | -0.8803 |
| YRI | TP53TG3 | 32693528 | 0.5576  | 1.1764  | -1.1068 |
| YRI | TP53TG3 | 32698528 | 0.5114  | 1.3445  | -1.3531 |
| YRI | TP53TG3 | 32703528 | 0.2368  | 0.5042  | -0.8403 |
| YRI | TP53TG3 | 32708528 | 0.1141  | 0.1681  | -0.321  |
| YRI | TP53TG3 | 32713528 | 0.0183  | 0.1681  | -0.8905 |
| YRI | TP53TG3 | 32718528 | 0.0552  | 0.5042  | -1.4111 |
| YRI | TP53TG3 | 32723528 | 0.0369  | 0.3361  | -1.2012 |
| YRI | TP53TG3 | 32728528 | 0       | 0       | 0       |
| YRI | TP53TG3 | 32733528 | 0       | 0       | 0       |
| YRI | TP53TG3 | 32738528 | 0       | 0       | 0       |
| YRI | TP53TG3 | 32743528 | 0       | 0       | 0       |
| YRI | TP53TG3 | 32748528 | 0       | 0       | 0       |
| YRI | TP53TG3 | 32753528 | 0       | 0       | 0       |
| YRI | TP53TG3 | 32758528 | 0       | 0       | 0       |
| YRI | TP53TG3 | 32763528 | 0       | 0       | 0       |
| YRI | TP53TG3 | 32768528 | 0       | 0       | 0       |
| YRI | TP53TG3 | 32773528 | 0.0802  | 0.1681  | -0.5225 |
| YRI | TP53TG3 | 32778528 | 0.0802  | 0.1681  | -0.5225 |
| YRI | TP53TG3 | 32783528 | 0.1707  | 0.8403  | -1.5124 |
| YRI | TP53TG3 | 32788528 | 0.1707  | 0.8403  | -1.5124 |
| YRI | TP53TG3 | 32793528 | 0       | 0       | 0       |
| YRI | TP53TG3 | 32798528 | 0.1181  | 0.8403  | -1.6312 |
| YRI | TP53TG3 | 32803528 | 0.1366  | 1.0084  | -1.7381 |
| YRI | TP53TG3 | 32808528 | 0.2573  | 1.0084  | -1.4975 |
| YRI | TP53TG3 | 32813528 | 1.7154  | 4.2016  | -1.6241 |
| YRI | TP53TG3 | 32818528 | 4.8382  | 12.2685 | -1.8349 |
| YRI | TP53TG3 | 32823528 | 6.4213  | 14.6214 | -1.7149 |
| YRI | TP53TG3 | 32828528 | 6.1533  | 12.1005 | -1.4879 |

## 2\_TajimasD\_data

|     |         |          |        |         |         |
|-----|---------|----------|--------|---------|---------|
| YRI | TP53TG3 | 32833528 | 6.5614 | 12.4366 | -1.4324 |
| YRI | TP53TG3 | 32838528 | 5.8255 | 10.924  | -1.4042 |
| YRI | TP53TG3 | 32843528 | 6.4482 | 11.9324 | -1.3902 |
| YRI | TP53TG3 | 32848528 | 5.6686 | 13.2769 | -1.7437 |
| YRI | TP53TG3 | 32853528 | 6.7651 | 14.4534 | -1.6257 |
| YRI | TP53TG3 | 32858528 | 6.893  | 10.924  | -1.1102 |
| YRI | TP53TG3 | 32863528 | 1.8072 | 3.6974  | -1.3777 |
| YRI | TP53TG3 | 32868528 | 2.1901 | 3.1932  | -0.8273 |
| YRI | TP53TG3 | 32873528 | 2.9796 | 4.2016  | -0.7982 |
| YRI | TP53TG3 | 32878528 | 2.4465 | 6.0502  | -1.7075 |
| YRI | TP53TG3 | 32883528 | 2.5118 | 6.8906  | -1.8451 |
| YRI | TP53TG3 | 32888528 | 2.2752 | 6.2183  | -1.8229 |
| YRI | TP53TG3 | 32893528 | 3.21   | 6.0502  | -1.3457 |
| YRI | TP53TG3 | 32898528 | 3.7451 | 6.8906  | -1.3254 |
| YRI | TP53TG3 | 32903528 | 3.1554 | 7.3947  | -1.6752 |
| YRI | TP53TG3 | 32908528 | 2.6844 | 7.0586  | -1.8033 |
| YRI | TP53TG3 | 32913528 | 3.1734 | 8.4031  | -1.838  |
| YRI | TP53TG3 | 32918528 | 3.893  | 9.4115  | -1.7466 |
| YRI | TP53TG3 | 32923528 | 2.7302 | 9.0754  | -2.0771 |
| YRI | TP53TG3 | 32928528 | 3.6501 | 11.2602 | -2.0372 |
| YRI | TP53TG3 | 32933528 | 4.1719 | 10.924  | -1.8597 |
| YRI | TP53TG3 | 32938528 | 2.8341 | 9.4115  | -2.0817 |
| YRI | TP53TG3 | 32943528 | 3.2534 | 8.9073  | -1.8831 |
| YRI | TP53TG3 | 32948528 | 3.7094 | 9.0754  | -1.7565 |
| YRI | TP53TG3 | 32953528 | 6.081  | 12.4366 | -1.5495 |
| YRI | TP53TG3 | 32958528 | 5.2683 | 9.0754  | -1.2462 |
| YRI | TP53TG3 | 32963528 | 1.9573 | 3.8654  | -1.339  |
| YRI | TP53TG3 | 32968528 | 1.794  | 2.5209  | -0.728  |
| YRI | TP53TG3 | 32973528 | 2.0558 | 5.2099  | -1.7072 |
| YRI | TP53TG3 | 32978528 | 1.4466 | 4.8738  | -1.9673 |
| YRI | TP53TG3 | 32983528 | 0.8823 | 1.1764  | -0.526  |
| YRI | TP53TG3 | 32988528 | 0.3633 | 0.8403  | -1.0774 |
| YRI | TP53TG3 | 32993528 | 0.1533 | 0.6722  | -1.3584 |
| YRI | TP53TG3 | 32998528 | 1.3557 | 4.5377  | -1.9443 |
| YRI | TP53TG3 | 33003528 | 1.7157 | 7.0586  | -2.2026 |
| YRI | TP53TG3 | 33008528 | 0.8556 | 4.7057  | -2.2791 |
| YRI | TP53TG3 | 33013528 | 0.911  | 3.6974  | -2.0309 |
| YRI | TP53TG3 | 33018528 | 1.1195 | 5.2099  | -2.214  |
| YRI | TP53TG3 | 33023528 | 1.5376 | 6.5544  | -2.2118 |
| YRI | TP53TG3 | 33028528 | 1.7998 | 5.0419  | -1.8064 |
| YRI | TP53TG3 | 33033528 | 1.9072 | 5.2099  | -1.7877 |
| YRI | TP53TG3 | 33038528 | 1.9125 | 7.0586  | -2.1215 |
| YRI | TP53TG3 | 33043528 | 1.6243 | 4.8738  | -1.8653 |
| YRI | TP53TG3 | 33048528 | 1.3696 | 3.0251  | -1.4281 |
| YRI | TP53TG3 | 33053528 | 1.5277 | 6.0502  | -2.1428 |
| YRI | TP53TG3 | 33058528 | 2.4515 | 8.067   | -2.0491 |
| YRI | TP53TG3 | 33063528 | 2.054  | 6.3864  | -1.9553 |
| YRI | TP53TG3 | 33068528 | 3.2294 | 7.5628  | -1.6776 |
| YRI | TP53TG3 | 33073528 | 3.8836 | 9.0754  | -1.6995 |

## 2\_TajimasD\_data

|     |         |          |        |        |         |
|-----|---------|----------|--------|--------|---------|
| YRI | TP53TG3 | 33078528 | 1.4203 | 5.378  | -2.0828 |
| YRI | TP53TG3 | 33083528 | 0.3698 | 1.8487 | -1.8916 |
| YRI | TP53TG3 | 33088528 | 0.2343 | 1.3445 | -1.8032 |
| YRI | TP53TG3 | 33093528 | 0.1195 | 1.0084 | -1.7722 |
| YRI | TP53TG3 | 33098528 | 0.0185 | 0.1681 | -0.8893 |
| YRI | TP53TG3 | 33103528 | 0.4162 | 0.3361 | 0.3216  |
| YRI | TP53TG3 | 33108528 | 0.4968 | 0.5042 | -0.0233 |
| YRI | TP53TG3 | 33113528 | 0.1174 | 0.6722 | -1.4524 |
| YRI | TP53TG3 | 33118528 | 0.0369 | 0.5042 | -1.4686 |
| YRI | TP53TG3 | 33123528 | 0      | 0      | 0       |
| YRI | TP53TG3 | 33128528 | 0      | 0      | 0       |
| YRI | TP53TG3 | 33133528 | 0      | 0      | 0       |
| YRI | TP53TG3 | 33138528 | 1.0351 | 1.1764 | -0.2527 |
| YRI | TP53TG3 | 33143528 | 1.0444 | 1.3445 | -0.4874 |
| YRI | TP53TG3 | 33148528 | 0.0093 | 0.1681 | -0.944  |
| YRI | TP53TG3 | 33153528 | 0      | 0      | 0       |
| YRI | TP53TG3 | 33158528 | 0      | 0      | 0       |
| YRI | TP53TG3 | 33163528 | 0      | 0      | 0       |
| YRI | TP53TG3 | 33168528 | 0.0367 | 0.1681 | -0.7811 |
| CEU | TP53TG3 | 32696770 | 0.3395 | 0.6822 | -0.8949 |
| CEU | TP53TG3 | 32701770 | 0.437  | 0.6822 | -0.6403 |
| CEU | TP53TG3 | 32706770 | 0.1826 | 0.1706 | 0.0713  |
| CEU | TP53TG3 | 32711770 | 0      | 0      | 0       |
| CEU | TP53TG3 | 32716770 | 0      | 0      | 0       |
| CEU | TP53TG3 | 32721770 | 0      | 0      | 0       |
| CEU | TP53TG3 | 32726770 | 0      | 0      | 0       |
| CEU | TP53TG3 | 32731770 | 0      | 0      | 0       |
| CEU | TP53TG3 | 32736770 | 0.0101 | 0.1706 | -0.9534 |
| CEU | TP53TG3 | 32741770 | 0.0101 | 0.1706 | -0.9534 |
| CEU | TP53TG3 | 32746770 | 0.0101 | 0.1706 | -0.9534 |
| CEU | TP53TG3 | 32751770 | 0.0101 | 0.1706 | -0.9534 |
| CEU | TP53TG3 | 32756770 | 0      | 0      | 0       |
| CEU | TP53TG3 | 32761770 | 0      | 0      | 0       |
| CEU | TP53TG3 | 32766770 | 0.0101 | 0.1706 | -0.9534 |
| CEU | TP53TG3 | 32771770 | 0.0101 | 0.1706 | -0.9534 |
| CEU | TP53TG3 | 32776770 | 0      | 0      | 0       |
| CEU | TP53TG3 | 32781770 | 0.0301 | 0.3411 | -1.2467 |
| CEU | TP53TG3 | 32786770 | 0.0301 | 0.3411 | -1.2467 |
| CEU | TP53TG3 | 32791770 | 0      | 0      | 0       |
| CEU | TP53TG3 | 32796770 | 0.6232 | 0.5117 | 0.3497  |
| CEU | TP53TG3 | 32801770 | 0.6232 | 0.5117 | 0.3497  |
| CEU | TP53TG3 | 32806770 | 0.0303 | 0.3411 | -1.2459 |
| CEU | TP53TG3 | 32811770 | 0.5366 | 0.8528 | -0.7121 |
| CEU | TP53TG3 | 32816770 | 3.4517 | 4.4346 | -0.6167 |
| CEU | TP53TG3 | 32821770 | 5.7234 | 8.5281 | -0.9786 |
| CEU | TP53TG3 | 32826770 | 4.8071 | 7.6753 | -1.1025 |
| CEU | TP53TG3 | 32831770 | 3.6714 | 6.3108 | -1.2118 |
| CEU | TP53TG3 | 32836770 | 3.8147 | 6.6519 | -1.2422 |
| CEU | TP53TG3 | 32841770 | 5.8172 | 8.187  | -0.8585 |



## 2\_TajimasD\_data

|     |         |          |        |        |         |
|-----|---------|----------|--------|--------|---------|
| CEU | TP53TG3 | 32846770 | 4.8592 | 7.5047 | -1.038  |
| CEU | TP53TG3 | 32851770 | 4.1571 | 7.5047 | -1.3134 |
| CEU | TP53TG3 | 32856770 | 4.4727 | 7.8459 | -1.2707 |
| CEU | TP53TG3 | 32861770 | 2.496  | 4.4346 | -1.2163 |
| CEU | TP53TG3 | 32866770 | 2.0946 | 2.2173 | -0.1371 |
| CEU | TP53TG3 | 32871770 | 1.6479 | 2.0467 | -0.4745 |
| CEU | TP53TG3 | 32876770 | 1.3164 | 3.4112 | -1.6453 |
| CEU | TP53TG3 | 32881770 | 1.5766 | 4.4346 | -1.7932 |
| CEU | TP53TG3 | 32886770 | 1.4626 | 4.2641 | -1.8186 |
| CEU | TP53TG3 | 32891770 | 2.8872 | 5.1169 | -1.2342 |
| CEU | TP53TG3 | 32896770 | 2.7062 | 3.5818 | -0.6599 |
| CEU | TP53TG3 | 32901770 | 2.0265 | 2.5584 | -0.5299 |
| CEU | TP53TG3 | 32906770 | 2.1337 | 4.6052 | -1.5006 |
| CEU | TP53TG3 | 32911770 | 1.1272 | 5.6286 | -2.2897 |
| CEU | TP53TG3 | 32916770 | 1.462  | 5.458  | -2.089  |
| CEU | TP53TG3 | 32921770 | 1.1831 | 4.2641 | -2      |
| CEU | TP53TG3 | 32926770 | 1.6731 | 4.4346 | -1.7327 |
| CEU | TP53TG3 | 32931770 | 2.4527 | 5.1169 | -1.4747 |
| CEU | TP53TG3 | 32936770 | 1.2573 | 4.6052 | -2.0327 |
| CEU | TP53TG3 | 32941770 | 1.6026 | 4.4346 | -1.7769 |
| CEU | TP53TG3 | 32946770 | 1.9258 | 5.7991 | -1.9184 |
| CEU | TP53TG3 | 32951770 | 2.2888 | 6.4814 | -1.8792 |
| CEU | TP53TG3 | 32956770 | 3.6465 | 7.8459 | -1.582  |
| CEU | TP53TG3 | 32961770 | 2.1468 | 5.9697 | -1.845  |
| CEU | TP53TG3 | 32966770 | 1.3519 | 2.5584 | -1.2019 |
| CEU | TP53TG3 | 32971770 | 2.3018 | 3.5818 | -0.9647 |
| CEU | TP53TG3 | 32976770 | 1.2766 | 2.729  | -1.3728 |
| CEU | TP53TG3 | 32981770 | 0.1998 | 1.3645 | -1.8842 |
| CEU | TP53TG3 | 32986770 | 0.6797 | 1.1939 | -0.9163 |
| CEU | TP53TG3 | 32991770 | 0.6496 | 1.0234 | -0.7428 |
| CEU | TP53TG3 | 32996770 | 0.4939 | 2.0467 | -1.8477 |
| CEU | TP53TG3 | 33001770 | 1.2247 | 3.5818 | -1.7765 |
| CEU | TP53TG3 | 33006770 | 0.831  | 2.3879 | -1.6396 |
| CEU | TP53TG3 | 33011770 | 0.2461 | 1.5351 | -1.9113 |
| CEU | TP53TG3 | 33016770 | 0.4644 | 3.2407 | -2.2765 |
| CEU | TP53TG3 | 33021770 | 0.5335 | 3.5818 | -2.2975 |
| CEU | TP53TG3 | 33026770 | 1.3034 | 2.729  | -1.3475 |
| CEU | TP53TG3 | 33031770 | 1.2218 | 1.7056 | -0.6626 |
| CEU | TP53TG3 | 33036770 | 1.2888 | 3.0701 | -1.528  |
| CEU | TP53TG3 | 33041770 | 1.2342 | 3.5818 | -1.7694 |
| CEU | TP53TG3 | 33046770 | 0.6753 | 1.7056 | -1.4111 |
| CEU | TP53TG3 | 33051770 | 0.9489 | 2.729  | -1.6826 |
| CEU | TP53TG3 | 33056770 | 0.6877 | 3.9229 | -2.2565 |
| CEU | TP53TG3 | 33061770 | 1.0167 | 4.2641 | -2.108  |
| CEU | TP53TG3 | 33066770 | 2.5791 | 5.6286 | -1.5512 |
| CEU | TP53TG3 | 33071770 | 2.9794 | 6.1402 | -1.4874 |
| CEU | TP53TG3 | 33076770 | 1.1618 | 3.2407 | -1.7047 |
| CEU | TP53TG3 | 33081770 | 0.2579 | 1.0234 | -1.5211 |
| CEU | TP53TG3 | 33086770 | 0.2781 | 1.1939 | -1.632  |

## 2\_TajimasD\_data

|     |         |          |        |        |         |
|-----|---------|----------|--------|--------|---------|
| CEU | TP53TG3 | 33091770 | 0.8306 | 0.8528 | -0.05   |
| CEU | TP53TG3 | 33096770 | 0.8002 | 0.5117 | 0.9048  |
| CEU | TP53TG3 | 33101770 | 0      | 0      | 0       |
| CEU | TP53TG3 | 33106770 | 0.4482 | 0.3411 | 0.4293  |
| CEU | TP53TG3 | 33111770 | 0.4985 | 0.8528 | -0.7979 |
| CEU | TP53TG3 | 33116770 | 0.1189 | 0.8528 | -1.6527 |
| CEU | TP53TG3 | 33121770 | 0.0888 | 0.6822 | -1.5495 |
| CEU | TP53TG3 | 33126770 | 0.0202 | 0.3411 | -1.2864 |
| CEU | TP53TG3 | 33131770 | 0      | 0      | 0       |
| CEU | TP53TG3 | 33136770 | 0      | 0      | 0       |
| CEU | TP53TG3 | 33141770 | 0.7326 | 0.5117 | 0.6928  |
| CEU | TP53TG3 | 33146770 | 0.7326 | 0.5117 | 0.6928  |
| CEU | TP53TG3 | 33151770 | 0      | 0      | 0       |
| CEU | TP53TG3 | 33156770 | 0      | 0      | 0       |
| CEU | TP53TG3 | 33161770 | 0      | 0      | 0       |
| CEU | TP53TG3 | 33166770 | 0      | 0      | 0       |
| CEU | TP53TG3 | 33171770 | 0.059  | 0.1706 | -0.6629 |
| CEU | TP53TG3 | 33176770 | 0.059  | 0.1706 | -0.6629 |
| CEU | TP53TG3 | 33181770 | 0      | 0      | 0       |
| CEU | TP53TG3 | 33186770 | 0      | 0      | 0       |
| CEU | TP53TG3 | 33191770 | 0      | 0      | 0       |
| CEU | TP53TG3 | 33196770 | 0.0202 | 0.1706 | -0.8934 |
| CEU | TP53TG3 | 33201770 | 0.0202 | 0.1706 | -0.8934 |
| CEU | TP53TG3 | 33206770 | 0      | 0      | 0       |
| CEU | TP53TG3 | 33211770 | 0      | 0      | 0       |
| CEU | TP53TG3 | 33216770 | 0      | 0      | 0       |
| CEU | TP53TG3 | 33221770 | 0      | 0      | 0       |
| CEU | TP53TG3 | 33226770 | 0      | 0      | 0       |
| CEU | TP53TG3 | 33231770 | 0      | 0      | 0       |
| CEU | TP53TG3 | 33236770 | 1.0136 | 0.5117 | 1.5741  |
| CEU | TP53TG3 | 33241770 | 1.0237 | 0.6822 | 0.8918  |
| CEU | TP53TG3 | 33246770 | 0.0101 | 0.1706 | -0.9534 |
| CEU | TP53TG3 | 33251770 | 0      | 0      | 0       |
| CEU | TP53TG3 | 33256770 | 0      | 0      | 0       |
| CEU | TP53TG3 | 33261770 | 0      | 0      | 0       |
| CEU | TP53TG3 | 33266770 | 0      | 0      | 0       |
| CEU | TP53TG3 | 33271770 | 0      | 0      | 0       |
| CEU | TP53TG3 | 33276770 | 0      | 0      | 0       |
| CEU | TP53TG3 | 33281770 | 0      | 0      | 0       |
| CEU | TP53TG3 | 33286770 | 0      | 0      | 0       |
| CEU | TP53TG3 | 33291770 | 1.8664 | 1.8762 | -0.0125 |
| CEU | TP53TG3 | 33296770 | 1.9268 | 2.5584 | -0.6292 |
| CEU | TP53TG3 | 33301770 | 1.6343 | 2.2173 | -0.6513 |
| CEU | TP53TG3 | 33306770 | 3.7926 | 3.5818 | 0.1589  |
| CEU | TP53TG3 | 33311770 | 4.8588 | 5.1169 | -0.1429 |
| CEU | TP53TG3 | 33316770 | 4.6145 | 5.2874 | -0.3618 |
| CEU | TP53TG3 | 33321770 | 4.0157 | 4.2641 | -0.1612 |
| CEU | TP53TG3 | 33326770 | 2.9612 | 3.5818 | -0.4677 |
| CEU | TP53TG3 | 33331770 | 1.1266 | 2.729  | -1.5146 |

## 2\_TajimasD\_data

|     |         |          |         |         |         |
|-----|---------|----------|---------|---------|---------|
| CEU | TP53TG3 | 33336770 | 1.0344  | 4.0935  | -2.057  |
| CEU | TP53TG3 | 33341770 | 1.4982  | 5.1169  | -2.003  |
| CEU | TP53TG3 | 33346770 | 2.2016  | 6.4814  | -1.9183 |
| CEU | TP53TG3 | 33351770 | 2.3919  | 6.8225  | -1.8958 |
| CEU | TP53TG3 | 33356770 | 2.0544  | 5.2874  | -1.7384 |
| CEU | TP53TG3 | 33361770 | 2.0961  | 6.8225  | -2.0224 |
| CEU | TP53TG3 | 33366770 | 2.1058  | 7.3342  | -2.0949 |
| CEU | TP53TG3 | 33371770 | 1.9124  | 10.0632 | -2.4392 |
| CEU | TP53TG3 | 33376770 | 2.7291  | 14.4978 | -2.4968 |
| CEU | TP53TG3 | 33381770 | 6.3098  | 11.2571 | -1.3331 |
| CEU | TP53TG3 | 33386770 | 6.6316  | 6.1402  | 0.2312  |
| CEU | TP53TG3 | 33391770 | 5.0279  | 5.9697  | -0.4545 |
| CEU | TP53TG3 | 33396770 | 5.6589  | 7.1636  | -0.6159 |
| CEU | TP53TG3 | 33401770 | 5.4766  | 7.1636  | -0.6906 |
| CEU | TP53TG3 | 33406770 | 3.9388  | 6.4814  | -1.1396 |
| CEU | TP53TG3 | 33411770 | 13.8479 | 11.0866 | 0.7548  |
| CEU | TP53TG3 | 33416770 | 24.6395 | 13.4744 | 2.5392  |
| CEU | TP53TG3 | 33421770 | 20.0757 | 10.4043 | 2.8056  |
| CEU | TP53TG3 | 33426770 | 12.0662 | 9.2104  | 0.928   |
| CEU | TP53TG3 | 33431770 | 11.8132 | 10.2337 | 0.4653  |
| CEU | TP53TG3 | 33436770 | 10.6729 | 9.5515  | 0.3523  |
| CEU | TP53TG3 | 33441770 | 8.4732  | 7.8459  | 0.2363  |
| CEU | TP53TG3 | 33446770 | 12.0203 | 11.0866 | 0.2552  |
| CEU | TP53TG3 | 33451770 | 8.6417  | 11.2571 | -0.7047 |
| CEU | TP53TG3 | 33456770 | 3.7102  | 8.187   | -1.6218 |
| CEU | TP53TG3 | 33461770 | 8.6994  | 10.5749 | -0.5359 |
| CEU | TP53TG3 | 33466770 | 12.8036 | 12.4511 | 0.0864  |
| CEU | TP53TG3 | 33471770 | 12.362  | 12.4511 | -0.0218 |
| CEU | TP53TG3 | 33476770 | 14.2269 | 12.4511 | 0.4352  |
| CEU | TP53TG3 | 33481770 | 17.66   | 13.4744 | 0.9519  |
| CEU | TP53TG3 | 33486770 | 13.5074 | 11.5982 | 0.5002  |
| CEU | TP53TG3 | 33491770 | 7.0911  | 8.5281  | -0.5014 |
| CEU | TP53TG3 | 33496770 | 5.6285  | 8.0164  | -0.882  |
| CEU | TP53TG3 | 33501770 | 5.3834  | 7.6753  | -0.8809 |
| CEU | TP53TG3 | 33506770 | 9.2647  | 9.7221  | -0.1414 |
| CEU | TP53TG3 | 33511770 | 11.8724 | 10.7454 | 0.3172  |
| CEU | TP53TG3 | 33516770 | 9.7737  | 10.916  | -0.3168 |
| CEU | TP53TG3 | 33521770 | 8.4551  | 9.8926  | -0.4371 |
| CEU | TP53TG3 | 33526770 | 8.4779  | 8.5281  | -0.0175 |
| CEU | TP53TG3 | 33531770 | 7.5327  | 6.9931  | 0.2258  |
| CEU | TP53TG3 | 33536770 | 10.2993 | 8.3576  | 0.6902  |
| CEU | TP53TG3 | 33541770 | 8.8923  | 9.2104  | -0.1034 |
| CEU | TP53TG3 | 33546770 | 7.399   | 8.3576  | -0.3408 |
| CEU | TP53TG3 | 33551770 | 7.8551  | 7.5047  | 0.1375  |
| CEU | TP53TG3 | 33556770 | 6.1315  | 6.3108  | -0.0823 |
| CEU | TP53TG3 | 33561770 | 5.9177  | 5.2874  | 0.3389  |
| CEU | TP53TG3 | 33566770 | 7.94    | 7.1636  | 0.3178  |
| CEU | TP53TG3 | 33571770 | 11.4989 | 9.8926  | 0.4884  |
| CEU | TP53TG3 | 33576770 | 8.3476  | 9.3809  | -0.3301 |

## 2\_TajimasD\_data

|     |         |          |        |         |         |
|-----|---------|----------|--------|---------|---------|
| CEU | TP53TG3 | 33581770 | 3.0153 | 7.6753  | -1.7912 |
| CEU | TP53TG3 | 33586770 | 3.2622 | 9.0398  | -1.9102 |
| CEU | TP53TG3 | 33591770 | 4.2907 | 12.6216 | -2.0155 |
| CEU | TP53TG3 | 33596770 | 3.0468 | 13.645  | -2.3817 |
| CEU | TP53TG3 | 33601770 | 3.2235 | 15.3506 | -2.4365 |
| CEU | TP53TG3 | 33606770 | 4.3847 | 13.645  | -2.081  |
| CEU | TP53TG3 | 33611770 | 4.9551 | 11.4277 | -1.7196 |
| CEU | TP53TG3 | 33616770 | 3.6895 | 12.2805 | -2.1329 |
| CEU | TP53TG3 | 33621770 | 2.4185 | 10.0632 | -2.2878 |
| CEU | TP53TG3 | 33626770 | 3.5991 | 6.8225  | -1.3793 |
| CEU | TP53TG3 | 33631770 | 3.4556 | 5.2874  | -0.985  |
| CEU | TP53TG3 | 33636770 | 2.5999 | 4.2641  | -1.0803 |
| CEU | TP53TG3 | 33641770 | 2.1946 | 3.7524  | -1.1286 |
| CEU | TP53TG3 | 33646770 | 1.5547 | 5.7991  | -2.1022 |
| CEU | TP53TG3 | 33651770 | 1.1031 | 5.9697  | -2.3487 |
| CEU | TP53TG3 | 33656770 | 1.208  | 4.9463  | -2.1319 |
| CEU | TP53TG3 | 33661770 | 2.1565 | 5.9697  | -1.8403 |
| CEU | TP53TG3 | 33666770 | 1.2457 | 3.5818  | -1.7607 |
| CEU | TP53TG3 | 33671770 | 0.0707 | 1.0234  | -1.8931 |
| CEU | TP53TG3 | 33676770 | 0.0202 | 0.3411  | -1.2864 |
| CEU | TP53TG3 | 33681770 | 0.0101 | 0.1706  | -0.9534 |
| CEU | TP53TG3 | 33686770 | 0.7862 | 1.1939  | -0.7265 |
| CEU | TP53TG3 | 33691770 | 1.5951 | 2.0467  | -0.5374 |
| CHB | TP53TG3 | 32696770 | 0.2109 | 0.8471  | -1.4346 |
| CHB | TP53TG3 | 32701770 | 0.616  | 0.8471  | -0.5211 |
| CHB | TP53TG3 | 32706770 | 0.4529 | 0.1694  | 1.6846  |
| CHB | TP53TG3 | 32711770 | 0      | 0       | 0       |
| CHB | TP53TG3 | 32716770 | 0.0577 | 0.3388  | -1.1276 |
| CHB | TP53TG3 | 32721770 | 0.0771 | 0.5082  | -1.3533 |
| CHB | TP53TG3 | 32726770 | 0.0194 | 0.1694  | -0.8913 |
| CHB | TP53TG3 | 32731770 | 0      | 0       | 0       |
| CHB | TP53TG3 | 32736770 | 0      | 0       | 0       |
| CHB | TP53TG3 | 32741770 | 0      | 0       | 0       |
| CHB | TP53TG3 | 32746770 | 0.0097 | 0.1694  | -0.949  |
| CHB | TP53TG3 | 32751770 | 0.0097 | 0.1694  | -0.949  |
| CHB | TP53TG3 | 32756770 | 0      | 0       | 0       |
| CHB | TP53TG3 | 32761770 | 0      | 0       | 0       |
| CHB | TP53TG3 | 32766770 | 0      | 0       | 0       |
| CHB | TP53TG3 | 32771770 | 0      | 0       | 0       |
| CHB | TP53TG3 | 32776770 | 0      | 0       | 0       |
| CHB | TP53TG3 | 32781770 | 0.1563 | 0.3388  | -0.7321 |
| CHB | TP53TG3 | 32786770 | 0.1563 | 0.3388  | -0.7321 |
| CHB | TP53TG3 | 32791770 | 0      | 0       | 0       |
| CHB | TP53TG3 | 32796770 | 0.4466 | 0.6777  | -0.6042 |
| CHB | TP53TG3 | 32801770 | 0.4658 | 0.8471  | -0.8598 |
| CHB | TP53TG3 | 32806770 | 0.0289 | 0.3388  | -1.2431 |
| CHB | TP53TG3 | 32811770 | 0.4049 | 0.6777  | -0.7132 |
| CHB | TP53TG3 | 32816770 | 3.1765 | 5.4213  | -1.1771 |
| CHB | TP53TG3 | 32821770 | 4.7748 | 9.9955  | -1.5677 |

## 2\_TajimasD\_data

|     |         |          |        |        |         |
|-----|---------|----------|--------|--------|---------|
| CHB | TP53TG3 | 32826770 | 4.1741 | 9.1484 | -1.6218 |
| CHB | TP53TG3 | 32831770 | 3.9451 | 7.4543 | -1.3813 |
| CHB | TP53TG3 | 32836770 | 3.6691 | 5.5907 | -0.9804 |
| CHB | TP53TG3 | 32841770 | 5.5688 | 6.2684 | -0.3222 |
| CHB | TP53TG3 | 32846770 | 4.8873 | 6.946  | -0.8642 |
| CHB | TP53TG3 | 32851770 | 3.917  | 8.1319 | -1.532  |
| CHB | TP53TG3 | 32856770 | 4.1315 | 8.4708 | -1.5191 |
| CHB | TP53TG3 | 32861770 | 1.9497 | 4.2354 | -1.488  |
| CHB | TP53TG3 | 32866770 | 1.3855 | 2.3718 | -1.0411 |
| CHB | TP53TG3 | 32871770 | 1.3887 | 2.5412 | -1.1509 |
| CHB | TP53TG3 | 32876770 | 1.4782 | 5.5907 | -2.0983 |
| CHB | TP53TG3 | 32881770 | 1.5262 | 6.2684 | -2.1841 |
| CHB | TP53TG3 | 32886770 | 1.1586 | 3.8965 | -1.9149 |
| CHB | TP53TG3 | 32891770 | 2.4936 | 4.2354 | -1.1339 |
| CHB | TP53TG3 | 32896770 | 2.7839 | 3.5577 | -0.5848 |
| CHB | TP53TG3 | 32901770 | 2.2483 | 4.2354 | -1.2936 |
| CHB | TP53TG3 | 32906770 | 2.1655 | 5.5907 | -1.7476 |
| CHB | TP53TG3 | 32911770 | 1.1397 | 6.0989 | -2.341  |
| CHB | TP53TG3 | 32916770 | 1.5871 | 6.4378 | -2.181  |
| CHB | TP53TG3 | 32921770 | 1.7552 | 5.9295 | -2.0208 |
| CHB | TP53TG3 | 32926770 | 1.7472 | 7.2848 | -2.2259 |
| CHB | TP53TG3 | 32931770 | 2.1348 | 7.6237 | -2.1167 |
| CHB | TP53TG3 | 32936770 | 1.4118 | 6.0989 | -2.2125 |
| CHB | TP53TG3 | 32941770 | 1.8568 | 7.1154 | -2.1595 |
| CHB | TP53TG3 | 32946770 | 1.7179 | 7.1154 | -2.2166 |
| CHB | TP53TG3 | 32951770 | 2.0423 | 7.1154 | -2.0834 |
| CHB | TP53TG3 | 32956770 | 3.1938 | 7.7931 | -1.7383 |
| CHB | TP53TG3 | 32961770 | 1.588  | 3.8965 | -1.6146 |
| CHB | TP53TG3 | 32966770 | 1.131  | 1.1859 | -0.098  |
| CHB | TP53TG3 | 32971770 | 2.0327 | 2.2024 | -0.19   |
| CHB | TP53TG3 | 32976770 | 0.9678 | 1.5247 | -0.8274 |
| CHB | TP53TG3 | 32981770 | 0.0868 | 1.0165 | -1.8502 |
| CHB | TP53TG3 | 32986770 | 0.5749 | 1.0165 | -0.8788 |
| CHB | TP53TG3 | 32991770 | 0.5075 | 0.3388 | 0.6767  |
| CHB | TP53TG3 | 32996770 | 0.4986 | 1.6942 | -1.6408 |
| CHB | TP53TG3 | 33001770 | 1.2696 | 3.7271 | -1.7853 |
| CHB | TP53TG3 | 33006770 | 0.8667 | 2.8801 | -1.8153 |
| CHB | TP53TG3 | 33011770 | 0.8626 | 3.0495 | -1.8807 |
| CHB | TP53TG3 | 33016770 | 1.1656 | 4.5742 | -2.0756 |
| CHB | TP53TG3 | 33021770 | 0.8062 | 3.3883 | -2.0335 |
| CHB | TP53TG3 | 33026770 | 1.5302 | 3.8965 | -1.655  |
| CHB | TP53TG3 | 33031770 | 1.4858 | 4.066  | -1.7399 |
| CHB | TP53TG3 | 33036770 | 0.9773 | 3.3883 | -1.8987 |
| CHB | TP53TG3 | 33041770 | 0.7282 | 2.8801 | -1.9402 |
| CHB | TP53TG3 | 33046770 | 0.1909 | 1.5247 | -1.9815 |
| CHB | TP53TG3 | 33051770 | 0.9608 | 3.5577 | -1.9626 |
| CHB | TP53TG3 | 33056770 | 1.1315 | 4.7436 | -2.1307 |
| CHB | TP53TG3 | 33061770 | 1.0339 | 3.2189 | -1.7964 |
| CHB | TP53TG3 | 33066770 | 2.0299 | 2.8801 | -0.7665 |

## 2\_TajimasD\_data

|     |         |          |        |        |         |
|-----|---------|----------|--------|--------|---------|
| CHB | TP53TG3 | 33071770 | 2.9901 | 6.946  | -1.6605 |
| CHB | TP53TG3 | 33076770 | 1.8037 | 5.5907 | -1.9322 |
| CHB | TP53TG3 | 33081770 | 0.518  | 1.1859 | -1.1922 |
| CHB | TP53TG3 | 33086770 | 0.5542 | 1.1859 | -1.1276 |
| CHB | TP53TG3 | 33091770 | 1.0651 | 0.6777 | 1.0128  |
| CHB | TP53TG3 | 33096770 | 0.9812 | 0.5082 | 1.4848  |
| CHB | TP53TG3 | 33101770 | 0      | 0      | 0       |
| CHB | TP53TG3 | 33106770 | 0.3415 | 0.6777 | -0.8789 |
| CHB | TP53TG3 | 33111770 | 0.3415 | 0.6777 | -0.8789 |
| CHB | TP53TG3 | 33116770 | 0      | 0      | 0       |
| CHB | TP53TG3 | 33121770 | 0.0194 | 0.3388 | -1.2812 |
| CHB | TP53TG3 | 33126770 | 0.0194 | 0.3388 | -1.2812 |
| CHB | TP53TG3 | 33131770 | 0      | 0      | 0       |
| CHB | TP53TG3 | 33136770 | 0      | 0      | 0       |
| CHB | TP53TG3 | 33141770 | 0.6421 | 0.5082 | 0.4203  |
| CHB | TP53TG3 | 33146770 | 0.6421 | 0.5082 | 0.4203  |
| CHB | TP53TG3 | 33151770 | 0      | 0      | 0       |
| CHB | TP53TG3 | 33156770 | 0      | 0      | 0       |
| CHB | TP53TG3 | 33161770 | 0      | 0      | 0       |
| CHB | TP53TG3 | 33166770 | 0      | 0      | 0       |
| CHB | TP53TG3 | 33171770 | 0.0388 | 0.5082 | -1.4735 |
| CHB | TP53TG3 | 33176770 | 0.0388 | 0.5082 | -1.4735 |
| CHB | TP53TG3 | 33181770 | 0      | 0      | 0       |
| CHB | TP53TG3 | 33186770 | 0      | 0      | 0       |
| CHB | TP53TG3 | 33191770 | 0      | 0      | 0       |
| CHB | TP53TG3 | 33196770 | 0.0192 | 0.1694 | -0.8925 |
| CHB | TP53TG3 | 33201770 | 0.0192 | 0.1694 | -0.8925 |
| CHB | TP53TG3 | 33206770 | 0.4104 | 0.1694 | 1.4321  |
| CHB | TP53TG3 | 33211770 | 0.4104 | 0.1694 | 1.4321  |
| CHB | TP53TG3 | 33216770 | 0      | 0      | 0       |
| CHB | TP53TG3 | 33221770 | 0      | 0      | 0       |
| CHB | TP53TG3 | 33226770 | 0      | 0      | 0       |
| CHB | TP53TG3 | 33231770 | 0      | 0      | 0       |
| CHB | TP53TG3 | 33236770 | 0.6528 | 0.5082 | 0.4539  |
| CHB | TP53TG3 | 33241770 | 0.6528 | 0.5082 | 0.4539  |
| CHB | TP53TG3 | 33246770 | 0.0097 | 0.1694 | -0.949  |
| CHB | TP53TG3 | 33251770 | 0.0097 | 0.1694 | -0.949  |
| CHB | TP53TG3 | 33256770 | 0      | 0      | 0       |
| CHB | TP53TG3 | 33261770 | 0      | 0      | 0       |
| CHB | TP53TG3 | 33266770 | 0      | 0      | 0       |
| CHB | TP53TG3 | 33271770 | 0      | 0      | 0       |
| CHB | TP53TG3 | 33276770 | 0      | 0      | 0       |
| CHB | TP53TG3 | 33281770 | 0      | 0      | 0       |
| CHB | TP53TG3 | 33286770 | 0      | 0      | 0       |
| CHB | TP53TG3 | 33291770 | 1.6564 | 1.8636 | -0.2644 |
| CHB | TP53TG3 | 33296770 | 1.8294 | 2.5412 | -0.7108 |
| CHB | TP53TG3 | 33301770 | 1.5858 | 1.3553 | 0.3736  |
| CHB | TP53TG3 | 33306770 | 3.582  | 2.7106 | 0.8257  |
| CHB | TP53TG3 | 33311770 | 4.9461 | 5.0825 | -0.0757 |

## 2\_TajimasD\_data

|     |         |          |         |         |         |
|-----|---------|----------|---------|---------|---------|
| CHB | TP53TG3 | 33316770 | 4.8013  | 5.2519  | -0.243  |
| CHB | TP53TG3 | 33321770 | 3.3162  | 5.0825  | -0.9806 |
| CHB | TP53TG3 | 33326770 | 1.9437  | 5.0825  | -1.7426 |
| CHB | TP53TG3 | 33331770 | 0.807   | 3.8965  | -2.1609 |
| CHB | TP53TG3 | 33336770 | 0.8079  | 3.8965  | -2.1602 |
| CHB | TP53TG3 | 33341770 | 1.4653  | 4.7436  | -1.9338 |
| CHB | TP53TG3 | 33346770 | 2.0293  | 7.1154  | -2.0887 |
| CHB | TP53TG3 | 33351770 | 1.9808  | 7.9625  | -2.2166 |
| CHB | TP53TG3 | 33356770 | 2.0876  | 7.1154  | -2.0648 |
| CHB | TP53TG3 | 33361770 | 1.9623  | 7.2848  | -2.1395 |
| CHB | TP53TG3 | 33366770 | 1.8747  | 6.6072  | -2.0786 |
| CHB | TP53TG3 | 33371770 | 1.562   | 6.2684  | -2.1676 |
| CHB | TP53TG3 | 33376770 | 1.9671  | 6.946   | -2.0899 |
| CHB | TP53TG3 | 33381770 | 5.9794  | 7.7931  | -0.6855 |
| CHB | TP53TG3 | 33386770 | 6.7721  | 7.2848  | -0.2061 |
| CHB | TP53TG3 | 33391770 | 5.3482  | 6.2684  | -0.4238 |
| CHB | TP53TG3 | 33396770 | 5.4215  | 6.0989  | -0.3198 |
| CHB | TP53TG3 | 33401770 | 5.079   | 6.0989  | -0.4814 |
| CHB | TP53TG3 | 33406770 | 4.0851  | 5.4213  | -0.7007 |
| CHB | TP53TG3 | 33411770 | 13.0768 | 9.1484  | 1.2808  |
| CHB | TP53TG3 | 33416770 | 23.2194 | 13.045  | 2.3791  |
| CHB | TP53TG3 | 33421770 | 19.2661 | 11.1814 | 2.186   |
| CHB | TP53TG3 | 33426770 | 11.609  | 8.8096  | 0.9452  |
| CHB | TP53TG3 | 33431770 | 10.7925 | 9.9955  | 0.2393  |
| CHB | TP53TG3 | 33436770 | 10.7396 | 11.1814 | -0.1195 |
| CHB | TP53TG3 | 33441770 | 8.7658  | 9.4872  | -0.2274 |
| CHB | TP53TG3 | 33446770 | 11.5014 | 11.012  | 0.1342  |
| CHB | TP53TG3 | 33451770 | 8.591   | 10.3343 | -0.5074 |
| CHB | TP53TG3 | 33456770 | 2.9734  | 7.2848  | -1.733  |
| CHB | TP53TG3 | 33461770 | 7.8458  | 10.6731 | -0.7985 |
| CHB | TP53TG3 | 33466770 | 11.2084 | 13.3838 | -0.4965 |
| CHB | TP53TG3 | 33471770 | 10.2766 | 13.045  | -0.6473 |
| CHB | TP53TG3 | 33476770 | 13.3188 | 11.1814 | 0.5779  |
| CHB | TP53TG3 | 33481770 | 15.9347 | 12.7061 | 0.774   |
| CHB | TP53TG3 | 33486770 | 11.9395 | 12.3673 | -0.1052 |
| CHB | TP53TG3 | 33491770 | 6.7394  | 7.6237  | -0.341  |
| CHB | TP53TG3 | 33496770 | 5.1784  | 7.1154  | -0.7955 |
| CHB | TP53TG3 | 33501770 | 4.8249  | 8.8096  | -1.3453 |
| CHB | TP53TG3 | 33506770 | 8.7999  | 10.8426 | -0.5685 |
| CHB | TP53TG3 | 33511770 | 11.28   | 11.012  | 0.0735  |
| CHB | TP53TG3 | 33516770 | 8.5759  | 8.4708  | 0.0368  |
| CHB | TP53TG3 | 33521770 | 7.3213  | 6.0989  | 0.577   |
| CHB | TP53TG3 | 33526770 | 7.2989  | 6.6072  | 0.3038  |
| CHB | TP53TG3 | 33531770 | 6.3065  | 6.4378  | -0.059  |
| CHB | TP53TG3 | 33536770 | 8.8873  | 8.3013  | 0.209   |
| CHB | TP53TG3 | 33541770 | 7.7889  | 8.3013  | -0.1827 |
| CHB | TP53TG3 | 33546770 | 5.9556  | 7.2848  | -0.5343 |
| CHB | TP53TG3 | 33551770 | 6.9749  | 7.7931  | -0.3092 |
| CHB | TP53TG3 | 33556770 | 5.8883  | 6.0989  | -0.0994 |

## 2\_TajimasD\_data

|     |         |          |         |        |         |
|-----|---------|----------|---------|--------|---------|
| CHB | TP53TG3 | 33561770 | 5.1515  | 4.913  | 0.1364  |
| CHB | TP53TG3 | 33566770 | 7.663   | 6.2684 | 0.6423  |
| CHB | TP53TG3 | 33571770 | 10.2469 | 9.4872 | 0.2395  |
| CHB | TP53TG3 | 33576770 | 6.5304  | 7.2848 | -0.3032 |
| CHB | TP53TG3 | 33581770 | 2.2739  | 4.2354 | -1.2769 |
| CHB | TP53TG3 | 33586770 | 2.7767  | 5.7601 | -1.4822 |
| CHB | TP53TG3 | 33591770 | 3.6471  | 6.2684 | -1.2073 |
| CHB | TP53TG3 | 33596770 | 2.6954  | 6.0989 | -1.6066 |
| CHB | TP53TG3 | 33601770 | 2.4361  | 6.7766 | -1.8632 |
| CHB | TP53TG3 | 33606770 | 2.6075  | 6.4378 | -1.7222 |
| CHB | TP53TG3 | 33611770 | 2.7645  | 5.5907 | -1.442  |
| CHB | TP53TG3 | 33616770 | 1.7382  | 5.2519 | -1.895  |
| CHB | TP53TG3 | 33621770 | 1.0691  | 4.2354 | -2.0613 |
| CHB | TP53TG3 | 33626770 | 2.4047  | 4.066  | -1.1203 |
| CHB | TP53TG3 | 33631770 | 2.5287  | 3.2189 | -0.5674 |
| CHB | TP53TG3 | 33636770 | 2.3284  | 1.8636 | 0.593   |
| CHB | TP53TG3 | 33641770 | 1.9591  | 1.8636 | 0.1218  |
| CHB | TP53TG3 | 33646770 | 1.0994  | 2.5412 | -1.4397 |
| CHB | TP53TG3 | 33651770 | 0.6467  | 2.5412 | -1.8918 |
| CHB | TP53TG3 | 33656770 | 1.5037  | 2.7106 | -1.1436 |
| CHB | TP53TG3 | 33661770 | 2.1551  | 5.0825 | -1.6252 |
| CHB | TP53TG3 | 33666770 | 0.7773  | 3.7271 | -2.143  |
| CHB | TP53TG3 | 33671770 | 0.0676  | 0.5082 | -1.3831 |
| CHB | TP53TG3 | 33676770 | 0       | 0      | 0       |
| CHB | TP53TG3 | 33681770 | 0.0386  | 0.3388 | -1.2042 |
| CHB | TP53TG3 | 33686770 | 0.3617  | 1.1859 | -1.4712 |
| CHB | TP53TG3 | 33691770 | 0.9282  | 2.033  | -1.3175 |
| YRI | TP53TG3 | 32696770 | 0.4071  | 1.1764 | -1.3759 |
| YRI | TP53TG3 | 32701770 | 0.3174  | 0.8403 | -1.181  |
| YRI | TP53TG3 | 32706770 | 0.2185  | 0.3361 | -0.4721 |
| YRI | TP53TG3 | 32711770 | 0       | 0      | 0       |
| YRI | TP53TG3 | 32716770 | 0.0552  | 0.5042 | -1.4111 |
| YRI | TP53TG3 | 32721770 | 0.0552  | 0.5042 | -1.4111 |
| YRI | TP53TG3 | 32726770 | 0       | 0      | 0       |
| YRI | TP53TG3 | 32731770 | 0       | 0      | 0       |
| YRI | TP53TG3 | 32736770 | 0       | 0      | 0       |
| YRI | TP53TG3 | 32741770 | 0       | 0      | 0       |
| YRI | TP53TG3 | 32746770 | 0       | 0      | 0       |
| YRI | TP53TG3 | 32751770 | 0       | 0      | 0       |
| YRI | TP53TG3 | 32756770 | 0       | 0      | 0       |
| YRI | TP53TG3 | 32761770 | 0       | 0      | 0       |
| YRI | TP53TG3 | 32766770 | 0       | 0      | 0       |
| YRI | TP53TG3 | 32771770 | 0.0802  | 0.1681 | -0.5225 |
| YRI | TP53TG3 | 32776770 | 0.0802  | 0.1681 | -0.5225 |
| YRI | TP53TG3 | 32781770 | 0.1707  | 0.8403 | -1.5124 |
| YRI | TP53TG3 | 32786770 | 0.1707  | 0.8403 | -1.5124 |
| YRI | TP53TG3 | 32791770 | 0       | 0      | 0       |
| YRI | TP53TG3 | 32796770 | 0.1089  | 0.6722 | -1.4747 |
| YRI | TP53TG3 | 32801770 | 0.1366  | 1.0084 | -1.7381 |



## 2\_TajimasD\_data

|     |         |          |        |         |         |
|-----|---------|----------|--------|---------|---------|
| YRI | TP53TG3 | 32806770 | 0.1372 | 1.0084  | -1.7369 |
| YRI | TP53TG3 | 32811770 | 0.3387 | 1.1764  | -1.4983 |
| YRI | TP53TG3 | 32816770 | 4.1127 | 9.7476  | -1.7262 |
| YRI | TP53TG3 | 32821770 | 7.2513 | 16.302  | -1.7062 |
| YRI | TP53TG3 | 32826770 | 6.6775 | 13.613  | -1.5523 |
| YRI | TP53TG3 | 32831770 | 5.2013 | 11.0921 | -1.5994 |
| YRI | TP53TG3 | 32836770 | 4.7501 | 10.5879 | -1.6556 |
| YRI | TP53TG3 | 32841770 | 7.1979 | 13.1089 | -1.3712 |
| YRI | TP53TG3 | 32846770 | 6.3967 | 12.1005 | -1.427  |
| YRI | TP53TG3 | 32851770 | 5.6968 | 12.6047 | -1.6629 |
| YRI | TP53TG3 | 32856770 | 6.5809 | 12.9408 | -1.4934 |
| YRI | TP53TG3 | 32861770 | 4.0326 | 7.0586  | -1.2475 |
| YRI | TP53TG3 | 32866770 | 2.6123 | 2.8571  | -0.2214 |
| YRI | TP53TG3 | 32871770 | 2.8508 | 3.0251  | -0.1504 |
| YRI | TP53TG3 | 32876770 | 2.4865 | 6.3864  | -1.7601 |
| YRI | TP53TG3 | 32881770 | 1.913  | 7.2267  | -2.1442 |
| YRI | TP53TG3 | 32886770 | 2.4579 | 6.0502  | -1.7021 |
| YRI | TP53TG3 | 32891770 | 3.8919 | 6.7225  | -1.2197 |
| YRI | TP53TG3 | 32896770 | 3.0145 | 5.0419  | -1.1296 |
| YRI | TP53TG3 | 32901770 | 2.472  | 6.3864  | -1.7667 |
| YRI | TP53TG3 | 32906770 | 3.2552 | 8.067   | -1.7559 |
| YRI | TP53TG3 | 32911770 | 3.1157 | 8.067   | -1.8068 |
| YRI | TP53TG3 | 32916770 | 3.2234 | 8.4031  | -1.8205 |
| YRI | TP53TG3 | 32921770 | 3.231  | 8.9073  | -1.8905 |
| YRI | TP53TG3 | 32926770 | 3.4474 | 11.2602 | -2.0915 |
| YRI | TP53TG3 | 32931770 | 3.9418 | 11.2602 | -1.9591 |
| YRI | TP53TG3 | 32936770 | 3.3566 | 9.2434  | -1.8945 |
| YRI | TP53TG3 | 32941770 | 3.6865 | 9.2434  | -1.7884 |
| YRI | TP53TG3 | 32946770 | 3.0808 | 9.4115  | -2.0036 |
| YRI | TP53TG3 | 32951770 | 4.5831 | 10.756  | -1.725  |
| YRI | TP53TG3 | 32956770 | 6.6895 | 11.4282 | -1.251  |
| YRI | TP53TG3 | 32961770 | 3.0456 | 5.7141  | -1.3307 |
| YRI | TP53TG3 | 32966770 | 1.2856 | 2.0167  | -0.8741 |
| YRI | TP53TG3 | 32971770 | 2.1265 | 4.5377  | -1.4734 |
| YRI | TP53TG3 | 32976770 | 1.9896 | 5.378   | -1.7832 |
| YRI | TP53TG3 | 32981770 | 1.0054 | 2.5209  | -1.5177 |
| YRI | TP53TG3 | 32986770 | 0.3633 | 0.8403  | -1.0774 |
| YRI | TP53TG3 | 32991770 | 0.4519 | 0.8403  | -0.8773 |
| YRI | TP53TG3 | 32996770 | 0.9464 | 2.5209  | -1.5768 |
| YRI | TP53TG3 | 33001770 | 1.7065 | 6.8906  | -2.1844 |
| YRI | TP53TG3 | 33006770 | 1.2375 | 6.3864  | -2.3239 |
| YRI | TP53TG3 | 33011770 | 0.9018 | 3.5293  | -1.9922 |
| YRI | TP53TG3 | 33016770 | 1.047  | 5.2099  | -2.2533 |
| YRI | TP53TG3 | 33021770 | 1.238  | 6.0502  | -2.28   |
| YRI | TP53TG3 | 33026770 | 1.8183 | 4.7057  | -1.7092 |
| YRI | TP53TG3 | 33031770 | 1.5135 | 4.2016  | -1.7559 |
| YRI | TP53TG3 | 33036770 | 1.9938 | 7.3947  | -2.1342 |
| YRI | TP53TG3 | 33041770 | 1.7783 | 6.0502  | -2.0241 |
| YRI | TP53TG3 | 33046770 | 1.0472 | 2.3529  | -1.3821 |

## 2\_TajimasD\_data

|     |         |          |        |         |         |
|-----|---------|----------|--------|---------|---------|
| YRI | TP53TG3 | 33051770 | 1.9136 | 5.7141  | -1.8951 |
| YRI | TP53TG3 | 33056770 | 2.1709 | 8.5712  | -2.2088 |
| YRI | TP53TG3 | 33061770 | 1.8422 | 6.2183  | -2.023  |
| YRI | TP53TG3 | 33066770 | 3.5237 | 7.2267  | -1.4942 |
| YRI | TP53TG3 | 33071770 | 4.1296 | 10.0837 | -1.7673 |
| YRI | TP53TG3 | 33076770 | 1.5297 | 5.2099  | -1.992  |
| YRI | TP53TG3 | 33081770 | 0.5075 | 2.0167  | -1.8045 |
| YRI | TP53TG3 | 33086770 | 0.4065 | 2.0167  | -1.9252 |
| YRI | TP53TG3 | 33091770 | 0.1195 | 1.0084  | -1.7722 |
| YRI | TP53TG3 | 33096770 | 0.0736 | 0.6722  | -1.5671 |
| YRI | TP53TG3 | 33101770 | 0.0276 | 0.1681  | -0.8352 |
| YRI | TP53TG3 | 33106770 | 0.4968 | 0.5042  | -0.0233 |
| YRI | TP53TG3 | 33111770 | 0.5061 | 0.8403  | -0.7548 |
| YRI | TP53TG3 | 33116770 | 0.0369 | 0.5042  | -1.4686 |
| YRI | TP53TG3 | 33121770 | 0      | 0       | 0       |
| YRI | TP53TG3 | 33126770 | 0      | 0       | 0       |
| YRI | TP53TG3 | 33131770 | 0      | 0       | 0       |
| YRI | TP53TG3 | 33136770 | 0      | 0       | 0       |
| YRI | TP53TG3 | 33141770 | 1.0444 | 1.3445  | -0.4874 |
| YRI | TP53TG3 | 33146770 | 1.0444 | 1.3445  | -0.4874 |
| YRI | TP53TG3 | 33151770 | 0      | 0       | 0       |
| YRI | TP53TG3 | 33156770 | 0      | 0       | 0       |
| YRI | TP53TG3 | 33161770 | 0      | 0       | 0       |
| YRI | TP53TG3 | 33166770 | 0      | 0       | 0       |
| YRI | TP53TG3 | 33171770 | 0.046  | 0.3361  | -1.1646 |
| YRI | TP53TG3 | 33176770 | 0.046  | 0.3361  | -1.1646 |
| YRI | TP53TG3 | 33181770 | 0      | 0       | 0       |
| YRI | TP53TG3 | 33186770 | 0      | 0       | 0       |
| YRI | TP53TG3 | 33191770 | 0      | 0       | 0       |
| YRI | TP53TG3 | 33196770 | 0      | 0       | 0       |
| YRI | TP53TG3 | 33201770 | 0.0276 | 0.1681  | -0.8352 |
| YRI | TP53TG3 | 33206770 | 0.0814 | 0.3361  | -1.0225 |
| YRI | TP53TG3 | 33211770 | 0.0538 | 0.1681  | -0.6795 |
| YRI | TP53TG3 | 33216770 | 0      | 0       | 0       |
| YRI | TP53TG3 | 33221770 | 0      | 0       | 0       |
| YRI | TP53TG3 | 33226770 | 0      | 0       | 0       |
| YRI | TP53TG3 | 33231770 | 0      | 0       | 0       |
| YRI | TP53TG3 | 33236770 | 1.0032 | 0.5042  | 1.5682  |
| YRI | TP53TG3 | 33241770 | 1.0125 | 0.6722  | 0.8909  |
| YRI | TP53TG3 | 33246770 | 0.0093 | 0.1681  | -0.944  |
| YRI | TP53TG3 | 33251770 | 0      | 0       | 0       |
| YRI | TP53TG3 | 33256770 | 0      | 0       | 0       |
| YRI | TP53TG3 | 33261770 | 0      | 0       | 0       |
| YRI | TP53TG3 | 33266770 | 0      | 0       | 0       |
| YRI | TP53TG3 | 33271770 | 0      | 0       | 0       |
| YRI | TP53TG3 | 33276770 | 0      | 0       | 0       |
| YRI | TP53TG3 | 33281770 | 0      | 0       | 0       |
| YRI | TP53TG3 | 33286770 | 0      | 0       | 0       |
| YRI | TP53TG3 | 33291770 | 1.877  | 4.2016  | -1.5185 |

## 2\_TajimasD\_data

|     |         |          |         |         |         |
|-----|---------|----------|---------|---------|---------|
| YRI | TP53TG3 | 33296770 | 2.1295  | 5.7141  | -1.7875 |
| YRI | TP53TG3 | 33301770 | 1.8823  | 2.8571  | -0.8816 |
| YRI | TP53TG3 | 33306770 | 4.1931  | 4.3696  | -0.1114 |
| YRI | TP53TG3 | 33311770 | 5.048   | 6.7225  | -0.7215 |
| YRI | TP53TG3 | 33316770 | 4.9183  | 7.5628  | -1.0238 |
| YRI | TP53TG3 | 33321770 | 4.241   | 7.5628  | -1.286  |
| YRI | TP53TG3 | 33326770 | 3.3794  | 7.2267  | -1.5525 |
| YRI | TP53TG3 | 33331770 | 2.2943  | 5.2099  | -1.5782 |
| YRI | TP53TG3 | 33336770 | 2.2536  | 5.7141  | -1.7256 |
| YRI | TP53TG3 | 33341770 | 2.7208  | 8.4031  | -1.9971 |
| YRI | TP53TG3 | 33346770 | 2.5786  | 11.4282 | -2.3363 |
| YRI | TP53TG3 | 33351770 | 2.9939  | 12.4366 | -2.3021 |
| YRI | TP53TG3 | 33356770 | 3.697   | 11.9324 | -2.0877 |
| YRI | TP53TG3 | 33361770 | 3.9247  | 12.6047 | -2.0895 |
| YRI | TP53TG3 | 33366770 | 3.7491  | 11.0921 | -1.9937 |
| YRI | TP53TG3 | 33371770 | 5.8232  | 15.4617 | -1.9112 |
| YRI | TP53TG3 | 33376770 | 7.9482  | 19.9994 | -1.8672 |
| YRI | TP53TG3 | 33381770 | 8.3761  | 14.4534 | -1.285  |
| YRI | TP53TG3 | 33386770 | 7.3484  | 8.5712  | -0.422  |
| YRI | TP53TG3 | 33391770 | 6.3018  | 8.4031  | -0.7385 |
| YRI | TP53TG3 | 33396770 | 6.8609  | 9.7476  | -0.8843 |
| YRI | TP53TG3 | 33401770 | 6.4929  | 8.7392  | -0.7614 |
| YRI | TP53TG3 | 33406770 | 4.6571  | 7.5628  | -1.1249 |
| YRI | TP53TG3 | 33411770 | 14.7398 | 11.5963 | 0.8186  |
| YRI | TP53TG3 | 33416770 | 26.1933 | 16.9743 | 1.6721  |
| YRI | TP53TG3 | 33421770 | 20.9322 | 14.4534 | 1.3699  |
| YRI | TP53TG3 | 33426770 | 13.4646 | 11.9324 | 0.3884  |
| YRI | TP53TG3 | 33431770 | 14.7575 | 17.6465 | -0.5048 |
| YRI | TP53TG3 | 33436770 | 14.161  | 17.9827 | -0.6558 |
| YRI | TP53TG3 | 33441770 | 11.9855 | 13.7811 | -0.3972 |
| YRI | TP53TG3 | 33446770 | 15.3861 | 14.1172 | 0.2744  |
| YRI | TP53TG3 | 33451770 | 10.8581 | 11.9324 | -0.2723 |
| YRI | TP53TG3 | 33456770 | 5.0482  | 10.0837 | -1.4946 |
| YRI | TP53TG3 | 33461770 | 12.4314 | 12.7727 | -0.0811 |
| YRI | TP53TG3 | 33466770 | 17.2548 | 17.6465 | -0.0684 |
| YRI | TP53TG3 | 33471770 | 16.8155 | 18.4868 | -0.2793 |
| YRI | TP53TG3 | 33476770 | 16.7361 | 15.1256 | 0.3261  |
| YRI | TP53TG3 | 33481770 | 20.8596 | 16.9743 | 0.7047  |
| YRI | TP53TG3 | 33486770 | 18.0851 | 16.9743 | 0.2015  |
| YRI | TP53TG3 | 33491770 | 8.3154  | 11.5963 | -0.8544 |
| YRI | TP53TG3 | 33496770 | 6.5755  | 10.0837 | -1.0413 |
| YRI | TP53TG3 | 33501770 | 8.1141  | 11.7644 | -0.9378 |
| YRI | TP53TG3 | 33506770 | 13.5605 | 13.613  | -0.0118 |
| YRI | TP53TG3 | 33511770 | 16.7462 | 13.613  | 0.7013  |
| YRI | TP53TG3 | 33516770 | 12.4223 | 11.2602 | 0.3111  |
| YRI | TP53TG3 | 33521770 | 9.0974  | 11.5963 | -0.6507 |
| YRI | TP53TG3 | 33526770 | 8.8452  | 11.0921 | -0.61   |
| YRI | TP53TG3 | 33531770 | 7.9688  | 9.4115  | -0.4566 |
| YRI | TP53TG3 | 33536770 | 12.2519 | 11.4282 | 0.2175  |

## 2\_TajimasD\_data

|     |         |          |         |         |         |
|-----|---------|----------|---------|---------|---------|
| YRI | TP53TG3 | 33541770 | 11.7452 | 11.7644 | -0.0049 |
| YRI | TP53TG3 | 33546770 | 9.0676  | 11.0921 | -0.5497 |
| YRI | TP53TG3 | 33551770 | 9.5184  | 10.924  | -0.3871 |
| YRI | TP53TG3 | 33556770 | 8.6304  | 9.7476  | -0.3422 |
| YRI | TP53TG3 | 33561770 | 8.0161  | 8.4031  | -0.136  |
| YRI | TP53TG3 | 33566770 | 9.6603  | 10.4199 | -0.2187 |
| YRI | TP53TG3 | 33571770 | 13.1529 | 15.1256 | -0.3995 |
| YRI | TP53TG3 | 33576770 | 11.0559 | 13.7811 | -0.6029 |
| YRI | TP53TG3 | 33581770 | 7.3244  | 10.2518 | -0.8556 |
| YRI | TP53TG3 | 33586770 | 10.7083 | 14.2853 | -0.7648 |
| YRI | TP53TG3 | 33591770 | 16.551  | 17.1423 | -0.1062 |
| YRI | TP53TG3 | 33596770 | 18.4119 | 15.9659 | 0.4704  |
| YRI | TP53TG3 | 33601770 | 19.0765 | 17.6465 | 0.2499  |
| YRI | TP53TG3 | 33606770 | 20.2391 | 20.6717 | -0.0649 |
| YRI | TP53TG3 | 33611770 | 21.383  | 21.0078 | 0.0554  |
| YRI | TP53TG3 | 33616770 | 19.1303 | 18.4868 | 0.1075  |
| YRI | TP53TG3 | 33621770 | 13.3428 | 14.9575 | -0.3305 |
| YRI | TP53TG3 | 33626770 | 7.6943  | 11.4282 | -0.9858 |
| YRI | TP53TG3 | 33631770 | 4.4203  | 7.5628  | -1.2166 |
| YRI | TP53TG3 | 33636770 | 3.7399  | 5.378   | -0.8621 |
| YRI | TP53TG3 | 33641770 | 2.8609  | 5.378   | -1.3247 |
| YRI | TP53TG3 | 33646770 | 4.2526  | 7.2267  | -1.2001 |
| YRI | TP53TG3 | 33651770 | 5.1738  | 8.235   | -1.0961 |
| YRI | TP53TG3 | 33656770 | 4.0376  | 6.3864  | -1.0601 |
| YRI | TP53TG3 | 33661770 | 5.1117  | 7.8989  | -1.0369 |
| YRI | TP53TG3 | 33666770 | 2.9759  | 5.2099  | -1.2092 |
| YRI | TP53TG3 | 33671770 | 0.2137  | 1.1764  | -1.7218 |
| YRI | TP53TG3 | 33676770 | 0.2137  | 1.0084  | -1.5844 |
| YRI | TP53TG3 | 33681770 | 0.0276  | 0.1681  | -0.8352 |
| YRI | TP53TG3 | 33686770 | 1.2934  | 1.1764  | 0.2093  |
| YRI | TP53TG3 | 33691770 | 3.0676  | 2.8571  | 0.1904  |
| CEU | TP53TG3 | 32806850 | 0.0303  | 0.3411  | -1.2459 |
| CEU | TP53TG3 | 32811850 | 0.5366  | 0.8528  | -0.7121 |
| CEU | TP53TG3 | 32816850 | 3.4618  | 4.6052  | -0.6942 |
| CEU | TP53TG3 | 32821850 | 5.7234  | 8.5281  | -0.9786 |
| CEU | TP53TG3 | 32826850 | 4.7969  | 7.5047  | -1.0624 |
| CEU | TP53TG3 | 32831850 | 3.6714  | 6.3108  | -1.2118 |
| CEU | TP53TG3 | 32836850 | 3.8147  | 6.6519  | -1.2422 |
| CEU | TP53TG3 | 32841850 | 6.3074  | 8.5281  | -0.7748 |
| CEU | TP53TG3 | 32846850 | 4.9281  | 7.6753  | -1.0559 |
| CEU | TP53TG3 | 32851850 | 3.6669  | 7.1636  | -1.4314 |
| CEU | TP53TG3 | 32856850 | 4.4038  | 7.6753  | -1.2575 |
| CEU | TP53TG3 | 32861850 | 2.496   | 4.4346  | -1.2163 |
| CEU | TP53TG3 | 32866850 | 2.0946  | 2.2173  | -0.1371 |
| CEU | TP53TG3 | 32871850 | 1.6479  | 2.0467  | -0.4745 |
| CEU | TP53TG3 | 32876850 | 1.3164  | 3.4112  | -1.6453 |
| CEU | TP53TG3 | 32881850 | 1.5766  | 4.4346  | -1.7932 |
| CEU | TP53TG3 | 32886850 | 1.4626  | 4.2641  | -1.8186 |
| CEU | TP53TG3 | 32891850 | 2.8872  | 5.1169  | -1.2342 |

## 2\_TajimasD\_data

|     |         |          |        |        |         |
|-----|---------|----------|--------|--------|---------|
| CEU | TP53TG3 | 32896850 | 2.7062 | 3.5818 | -0.6599 |
| CEU | TP53TG3 | 32901850 | 2.0366 | 2.729  | -0.6545 |
| CEU | TP53TG3 | 32906850 | 2.1337 | 4.6052 | -1.5006 |
| CEU | TP53TG3 | 32911850 | 1.1171 | 5.458  | -2.2693 |
| CEU | TP53TG3 | 32916850 | 1.462  | 5.458  | -2.089  |
| CEU | TP53TG3 | 32921850 | 1.1831 | 4.2641 | -2      |
| CEU | TP53TG3 | 32926850 | 1.6931 | 4.6052 | -1.7681 |
| CEU | TP53TG3 | 32931850 | 2.4729 | 5.458  | -1.5605 |
| CEU | TP53TG3 | 32936850 | 1.2373 | 4.4346 | -2.0061 |
| CEU | TP53TG3 | 32941850 | 1.6687 | 4.2641 | -1.6848 |
| CEU | TP53TG3 | 32946850 | 1.9258 | 5.7991 | -1.9184 |
| CEU | TP53TG3 | 32951850 | 2.2024 | 6.3108 | -1.8862 |
| CEU | TP53TG3 | 32956850 | 3.6465 | 7.8459 | -1.582  |
| CEU | TP53TG3 | 32961850 | 2.1668 | 6.1402 | -1.8698 |
| CEU | TP53TG3 | 32966850 | 1.3519 | 2.5584 | -1.2019 |
| CEU | TP53TG3 | 32971850 | 2.2818 | 3.4112 | -0.8871 |
| CEU | TP53TG3 | 32976850 | 1.2766 | 2.729  | -1.3728 |
| CEU | TP53TG3 | 32981850 | 0.7017 | 1.5351 | -1.2358 |
| CEU | TP53TG3 | 32986850 | 0.6797 | 1.1939 | -0.9163 |
| CEU | TP53TG3 | 32991850 | 0.1476 | 0.8528 | -1.5881 |
| CEU | TP53TG3 | 32996850 | 0.4939 | 2.0467 | -1.8477 |
| CEU | TP53TG3 | 33001850 | 1.2247 | 3.5818 | -1.7765 |
| CEU | TP53TG3 | 33006850 | 0.831  | 2.3879 | -1.6396 |
| CEU | TP53TG3 | 33011850 | 0.2461 | 1.5351 | -1.9113 |
| CEU | TP53TG3 | 33016850 | 0.4644 | 3.2407 | -2.2765 |
| CEU | TP53TG3 | 33021850 | 1.0126 | 3.7524 | -1.9849 |
| CEU | TP53TG3 | 33026850 | 1.3034 | 2.729  | -1.3475 |
| CEU | TP53TG3 | 33031850 | 0.7427 | 1.5351 | -1.175  |
| CEU | TP53TG3 | 33036850 | 1.2888 | 3.0701 | -1.528  |
| CEU | TP53TG3 | 33041850 | 1.2342 | 3.5818 | -1.7694 |
| CEU | TP53TG3 | 33046850 | 0.6753 | 1.7056 | -1.4111 |
| CEU | TP53TG3 | 33051850 | 0.9489 | 2.729  | -1.6826 |
| CEU | TP53TG3 | 33056850 | 0.6877 | 3.9229 | -2.2565 |
| CEU | TP53TG3 | 33061850 | 1.0167 | 4.2641 | -2.108  |
| CEU | TP53TG3 | 33066850 | 2.5791 | 5.6286 | -1.5512 |
| CEU | TP53TG3 | 33071850 | 2.9794 | 6.1402 | -1.4874 |
| CEU | TP53TG3 | 33076850 | 1.1618 | 3.2407 | -1.7047 |
| CEU | TP53TG3 | 33081850 | 0.2579 | 1.0234 | -1.5211 |
| CEU | TP53TG3 | 33086850 | 0.2781 | 1.1939 | -1.632  |
| CEU | TP53TG3 | 33091850 | 0.8306 | 0.8528 | -0.05   |
| CEU | TP53TG3 | 33096850 | 0.8002 | 0.5117 | 0.9048  |
| CEU | TP53TG3 | 33101850 | 0      | 0      | 0       |
| CEU | TP53TG3 | 33106850 | 0.4482 | 0.3411 | 0.4293  |
| CEU | TP53TG3 | 33111850 | 0.4985 | 0.8528 | -0.7979 |
| CEU | TP53TG3 | 33116850 | 0.1189 | 0.8528 | -1.6527 |
| CEU | TP53TG3 | 33121850 | 0.0888 | 0.6822 | -1.5495 |
| CEU | TP53TG3 | 33126850 | 0.0202 | 0.3411 | -1.2864 |
| CEU | TP53TG3 | 33131850 | 0      | 0      | 0       |
| CEU | TP53TG3 | 33136850 | 0      | 0      | 0       |

## 2\_TajimasD\_data

|     |         |          |        |         |         |
|-----|---------|----------|--------|---------|---------|
| CEU | TP53TG3 | 33141850 | 0.7326 | 0.5117  | 0.6928  |
| CEU | TP53TG3 | 33146850 | 0.7326 | 0.5117  | 0.6928  |
| CEU | TP53TG3 | 33151850 | 0      | 0       | 0       |
| CEU | TP53TG3 | 33156850 | 0      | 0       | 0       |
| CEU | TP53TG3 | 33161850 | 0      | 0       | 0       |
| CEU | TP53TG3 | 33166850 | 0      | 0       | 0       |
| CEU | TP53TG3 | 33171850 | 0.059  | 0.1706  | -0.6629 |
| CEU | TP53TG3 | 33176850 | 0.059  | 0.1706  | -0.6629 |
| CEU | TP53TG3 | 33181850 | 0      | 0       | 0       |
| CEU | TP53TG3 | 33186850 | 0      | 0       | 0       |
| CEU | TP53TG3 | 33191850 | 0      | 0       | 0       |
| CEU | TP53TG3 | 33196850 | 0.0202 | 0.1706  | -0.8934 |
| CEU | TP53TG3 | 33201850 | 0.0202 | 0.1706  | -0.8934 |
| CEU | TP53TG3 | 33206850 | 0      | 0       | 0       |
| CEU | TP53TG3 | 33211850 | 0      | 0       | 0       |
| CEU | TP53TG3 | 33216850 | 0      | 0       | 0       |
| CEU | TP53TG3 | 33221850 | 0      | 0       | 0       |
| CEU | TP53TG3 | 33226850 | 0      | 0       | 0       |
| CEU | TP53TG3 | 33231850 | 0      | 0       | 0       |
| CEU | TP53TG3 | 33236850 | 1.0136 | 0.5117  | 1.5741  |
| CEU | TP53TG3 | 33241850 | 1.0237 | 0.6822  | 0.8918  |
| CEU | TP53TG3 | 33246850 | 0.0101 | 0.1706  | -0.9534 |
| CEU | TP53TG3 | 33251850 | 0      | 0       | 0       |
| CEU | TP53TG3 | 33256850 | 0      | 0       | 0       |
| CEU | TP53TG3 | 33261850 | 0      | 0       | 0       |
| CEU | TP53TG3 | 33266850 | 0      | 0       | 0       |
| CEU | TP53TG3 | 33271850 | 0      | 0       | 0       |
| CEU | TP53TG3 | 33276850 | 0      | 0       | 0       |
| CEU | TP53TG3 | 33281850 | 0      | 0       | 0       |
| CEU | TP53TG3 | 33286850 | 0      | 0       | 0       |
| CEU | TP53TG3 | 33291850 | 1.8664 | 1.8762  | -0.0125 |
| CEU | TP53TG3 | 33296850 | 1.947  | 2.729   | -0.7392 |
| CEU | TP53TG3 | 33301850 | 1.6343 | 2.2173  | -0.6513 |
| CEU | TP53TG3 | 33306850 | 3.7724 | 3.4112  | 0.2837  |
| CEU | TP53TG3 | 33311850 | 4.8588 | 5.1169  | -0.1429 |
| CEU | TP53TG3 | 33316850 | 4.6145 | 5.2874  | -0.3618 |
| CEU | TP53TG3 | 33321850 | 4.0157 | 4.2641  | -0.1612 |
| CEU | TP53TG3 | 33326850 | 2.9612 | 3.5818  | -0.4677 |
| CEU | TP53TG3 | 33331850 | 1.1266 | 2.729   | -1.5146 |
| CEU | TP53TG3 | 33336850 | 1.0445 | 4.2641  | -2.09   |
| CEU | TP53TG3 | 33341850 | 1.4982 | 5.1169  | -2.003  |
| CEU | TP53TG3 | 33346850 | 2.1915 | 6.3108  | -1.8913 |
| CEU | TP53TG3 | 33351850 | 2.3919 | 6.8225  | -1.8958 |
| CEU | TP53TG3 | 33356850 | 2.0544 | 5.2874  | -1.7384 |
| CEU | TP53TG3 | 33361850 | 2.0961 | 6.8225  | -2.0224 |
| CEU | TP53TG3 | 33366850 | 2.1058 | 7.3342  | -2.0949 |
| CEU | TP53TG3 | 33371850 | 1.9326 | 10.4043 | -2.4576 |
| CEU | TP53TG3 | 33376850 | 2.7689 | 14.6684 | -2.4966 |
| CEU | TP53TG3 | 33381850 | 6.2896 | 10.916  | -1.2831 |

## 2\_TajimasD\_data

|     |         |          |         |         |         |
|-----|---------|----------|---------|---------|---------|
| CEU | TP53TG3 | 33386850 | 6.5918  | 5.9697  | 0.3002  |
| CEU | TP53TG3 | 33391850 | 5.499   | 6.1402  | -0.3017 |
| CEU | TP53TG3 | 33396850 | 5.6589  | 7.1636  | -0.6159 |
| CEU | TP53TG3 | 33401850 | 5.0256  | 7.1636  | -0.8752 |
| CEU | TP53TG3 | 33406850 | 3.9388  | 6.4814  | -1.1396 |
| CEU | TP53TG3 | 33411850 | 14.3302 | 11.0866 | 0.8866  |
| CEU | TP53TG3 | 33416850 | 24.6597 | 13.645  | 2.4753  |
| CEU | TP53TG3 | 33421850 | 19.5733 | 10.2337 | 2.7515  |
| CEU | TP53TG3 | 33426850 | 12.5321 | 9.3809  | 1.0067  |
| CEU | TP53TG3 | 33431850 | 11.8233 | 10.4043 | 0.4116  |
| CEU | TP53TG3 | 33436850 | 10.1868 | 9.2104  | 0.3173  |
| CEU | TP53TG3 | 33441850 | 8.7989  | 8.0164  | 0.289   |
| CEU | TP53TG3 | 33446850 | 12.0203 | 11.0866 | 0.2552  |
| CEU | TP53TG3 | 33451850 | 8.3059  | 10.916  | -0.7239 |
| CEU | TP53TG3 | 33456850 | 3.7203  | 8.3576  | -1.6484 |
| CEU | TP53TG3 | 33461850 | 8.6994  | 10.5749 | -0.5359 |
| CEU | TP53TG3 | 33466850 | 12.8036 | 12.4511 | 0.0864  |
| CEU | TP53TG3 | 33471850 | 12.4587 | 12.6216 | -0.0394 |
| CEU | TP53TG3 | 33476850 | 14.2168 | 12.2805 | 0.4807  |
| CEU | TP53TG3 | 33481850 | 17.5633 | 13.3039 | 0.9804  |
| CEU | TP53TG3 | 33486850 | 13.5074 | 11.5982 | 0.5002  |
| CEU | TP53TG3 | 33491850 | 7.0911  | 8.5281  | -0.5014 |
| CEU | TP53TG3 | 33496850 | 5.6285  | 8.0164  | -0.882  |
| CEU | TP53TG3 | 33501850 | 5.3834  | 7.6753  | -0.8809 |
| CEU | TP53TG3 | 33506850 | 10.182  | 10.0632 | 0.0356  |
| CEU | TP53TG3 | 33511850 | 11.8724 | 10.7454 | 0.3172  |
| CEU | TP53TG3 | 33516850 | 9.0575  | 10.916  | -0.5155 |
| CEU | TP53TG3 | 33521850 | 8.4551  | 9.8926  | -0.4371 |
| CEU | TP53TG3 | 33526850 | 8.7661  | 8.3576  | 0.1452  |
| CEU | TP53TG3 | 33531850 | 8.4783  | 7.5047  | 0.382   |
| CEU | TP53TG3 | 33536850 | 9.8099  | 8.187   | 0.5879  |
| CEU | TP53TG3 | 33541850 | 8.4041  | 8.8692  | -0.1565 |
| CEU | TP53TG3 | 33546850 | 7.8735  | 8.5281  | -0.2284 |
| CEU | TP53TG3 | 33551850 | 8.3381  | 7.6753  | 0.2548  |
| CEU | TP53TG3 | 33556850 | 6.1429  | 6.3108  | -0.0771 |
| CEU | TP53TG3 | 33561850 | 4.9773  | 4.9463  | 0.0177  |
| CEU | TP53TG3 | 33566850 | 7.4541  | 6.9931  | 0.1929  |
| CEU | TP53TG3 | 33571850 | 11.4989 | 9.8926  | 0.4884  |
| CEU | TP53TG3 | 33576850 | 8.3476  | 9.3809  | -0.3301 |
| CEU | TP53TG3 | 33581850 | 3.1119  | 7.8459  | -1.7834 |
| CEU | TP53TG3 | 33586850 | 3.2622  | 9.0398  | -1.9102 |
| CEU | TP53TG3 | 33591850 | 4.2041  | 12.6216 | -2.0365 |
| CEU | TP53TG3 | 33596850 | 3.0468  | 13.645  | -2.3817 |
| CEU | TP53TG3 | 33601850 | 3.2134  | 15.1801 | -2.43   |
| CEU | TP53TG3 | 33606850 | 4.5428  | 13.8156 | -2.0594 |
| CEU | TP53TG3 | 33611850 | 4.9551  | 11.4277 | -1.7196 |
| CEU | TP53TG3 | 33616850 | 3.5615  | 12.2805 | -2.1647 |
| CEU | TP53TG3 | 33621850 | 2.4385  | 10.2337 | -2.2965 |
| CEU | TP53TG3 | 33626850 | 3.5892  | 6.9931  | -1.4243 |

## 2\_TajimasD\_data

|     |         |          |        |        |         |
|-----|---------|----------|--------|--------|---------|
| CEU | TP53TG3 | 33631850 | 3.4356 | 5.1169 | -0.9306 |
| CEU | TP53TG3 | 33636850 | 2.5797 | 3.9229 | -0.9368 |
| CEU | TP53TG3 | 33641850 | 2.1946 | 3.7524 | -1.1286 |
| CEU | TP53TG3 | 33646850 | 1.5547 | 5.7991 | -2.1022 |
| CEU | TP53TG3 | 33651850 | 1.1031 | 5.9697 | -2.3487 |
| CEU | TP53TG3 | 33656850 | 1.208  | 4.9463 | -2.1319 |
| CEU | TP53TG3 | 33661850 | 2.1565 | 5.9697 | -1.8403 |
| CEU | TP53TG3 | 33666850 | 1.2457 | 3.5818 | -1.7607 |
| CEU | TP53TG3 | 33671850 | 0.0707 | 1.0234 | -1.8931 |
| CEU | TP53TG3 | 33676850 | 0.0202 | 0.3411 | -1.2864 |
| CEU | TP53TG3 | 33681850 | 0.0101 | 0.1706 | -0.9534 |
| CEU | TP53TG3 | 33686850 | 0.7963 | 1.3645 | -0.9192 |
| CEU | TP53TG3 | 33691850 | 1.5951 | 2.0467 | -0.5374 |
| CEU | TP53TG3 | 33696850 | 1.2865 | 1.8762 | -0.7508 |
| CEU | TP53TG3 | 33701850 | 0.8693 | 1.8762 | -1.282  |
| CEU | TP53TG3 | 33706850 | 1.5902 | 4.7757 | -1.8735 |
| CEU | TP53TG3 | 33711850 | 2.2381 | 7.1636 | -2.0163 |
| CEU | TP53TG3 | 33716850 | 2.725  | 6.9931 | -1.7858 |
| CEU | TP53TG3 | 33721850 | 3.449  | 7.3342 | -1.5567 |
| CEU | TP53TG3 | 33726850 | 2.357  | 6.4814 | -1.8486 |
| CEU | TP53TG3 | 33731850 | 3.4315 | 6.9931 | -1.4902 |
| CEU | TP53TG3 | 33736850 | 3.8308 | 8.0164 | -1.546  |
| CEU | TP53TG3 | 33741850 | 1.3432 | 5.6286 | -2.1798 |
| CEU | TP53TG3 | 33746850 | 1.7337 | 3.4112 | -1.3175 |
| CEU | TP53TG3 | 33751850 | 2.6724 | 4.2641 | -1.0332 |
| CEU | TP53TG3 | 33756850 | 2.2719 | 3.4112 | -0.8948 |
| CEU | TP53TG3 | 33761850 | 2.7504 | 2.8996 | -0.1342 |
| CEU | TP53TG3 | 33766850 | 2.0559 | 4.0935 | -1.3701 |
| CEU | TP53TG3 | 33771850 | 1.7194 | 4.6052 | -1.7521 |
| CEU | TP53TG3 | 33776850 | 2.5296 | 4.2641 | -1.1259 |
| CEU | TP53TG3 | 33781850 | 2.7681 | 3.2407 | -0.3875 |
| CEU | TP53TG3 | 33786850 | 1.9864 | 3.5818 | -1.2025 |
| CEU | TP53TG3 | 33791850 | 1.175  | 5.7991 | -2.2903 |
| CEU | TP53TG3 | 33796850 | 2.026  | 9.0398 | -2.3189 |
| CEU | TP53TG3 | 33801850 | 1.5401 | 7.1636 | -2.302  |
| CHB | TP53TG3 | 32806850 | 0.0289 | 0.3388 | -1.2431 |
| CHB | TP53TG3 | 32811850 | 0.4049 | 0.6777 | -0.7132 |
| CHB | TP53TG3 | 32816850 | 3.1765 | 5.4213 | -1.1771 |
| CHB | TP53TG3 | 32821850 | 4.7748 | 9.9955 | -1.5677 |
| CHB | TP53TG3 | 32826850 | 4.1838 | 9.3178 | -1.6456 |
| CHB | TP53TG3 | 32831850 | 3.9451 | 7.4543 | -1.3813 |
| CHB | TP53TG3 | 32836850 | 3.6691 | 5.5907 | -0.9804 |
| CHB | TP53TG3 | 32841850 | 6.0373 | 6.4378 | -0.1801 |
| CHB | TP53TG3 | 32846850 | 4.8873 | 6.946  | -0.8642 |
| CHB | TP53TG3 | 32851850 | 3.4485 | 7.9625 | -1.6727 |
| CHB | TP53TG3 | 32856850 | 4.1218 | 8.3013 | -1.4906 |
| CHB | TP53TG3 | 32861850 | 1.9497 | 4.2354 | -1.488  |
| CHB | TP53TG3 | 32866850 | 1.3855 | 2.3718 | -1.0411 |
| CHB | TP53TG3 | 32871850 | 1.3887 | 2.5412 | -1.1509 |



## 2\_TajimasD\_data

|     |         |          |        |        |         |
|-----|---------|----------|--------|--------|---------|
| CHB | TP53TG3 | 32876850 | 1.4782 | 5.5907 | -2.0983 |
| CHB | TP53TG3 | 32881850 | 1.5165 | 6.0989 | -2.1631 |
| CHB | TP53TG3 | 32886850 | 1.1586 | 3.8965 | -1.9149 |
| CHB | TP53TG3 | 32891850 | 2.4936 | 4.2354 | -1.1339 |
| CHB | TP53TG3 | 32896850 | 2.7839 | 3.5577 | -0.5848 |
| CHB | TP53TG3 | 32901850 | 2.258  | 4.4048 | -1.3509 |
| CHB | TP53TG3 | 32906850 | 2.1655 | 5.5907 | -1.7476 |
| CHB | TP53TG3 | 32911850 | 1.13   | 5.9295 | -2.3235 |
| CHB | TP53TG3 | 32916850 | 1.5871 | 6.4378 | -2.181  |
| CHB | TP53TG3 | 32921850 | 1.7552 | 5.9295 | -2.0208 |
| CHB | TP53TG3 | 32926850 | 1.7472 | 7.2848 | -2.2259 |
| CHB | TP53TG3 | 32931850 | 2.1542 | 7.9625 | -2.1524 |
| CHB | TP53TG3 | 32936850 | 1.4215 | 6.2684 | -2.2323 |
| CHB | TP53TG3 | 32941850 | 1.8374 | 6.946  | -2.1444 |
| CHB | TP53TG3 | 32946850 | 1.7082 | 6.946  | -2.1986 |
| CHB | TP53TG3 | 32951850 | 2.052  | 7.1154 | -2.0794 |
| CHB | TP53TG3 | 32956850 | 3.1938 | 7.7931 | -1.7383 |
| CHB | TP53TG3 | 32961850 | 1.5783 | 3.7271 | -1.5611 |
| CHB | TP53TG3 | 32966850 | 1.131  | 1.1859 | -0.098  |
| CHB | TP53TG3 | 32971850 | 2.0327 | 2.2024 | -0.19   |
| CHB | TP53TG3 | 32976850 | 0.9678 | 1.5247 | -0.8274 |
| CHB | TP53TG3 | 32981850 | 0.5846 | 1.1859 | -1.0733 |
| CHB | TP53TG3 | 32986850 | 0.5749 | 1.0165 | -0.8788 |
| CHB | TP53TG3 | 32991850 | 0.0097 | 0.1694 | -0.949  |
| CHB | TP53TG3 | 32996850 | 0.4986 | 1.6942 | -1.6408 |
| CHB | TP53TG3 | 33001850 | 1.2696 | 3.7271 | -1.7853 |
| CHB | TP53TG3 | 33006850 | 0.8667 | 2.8801 | -1.8153 |
| CHB | TP53TG3 | 33011850 | 0.9008 | 3.2189 | -1.9058 |
| CHB | TP53TG3 | 33016850 | 1.1656 | 4.5742 | -2.0756 |
| CHB | TP53TG3 | 33021850 | 1.2595 | 3.5577 | -1.7369 |
| CHB | TP53TG3 | 33026850 | 1.5399 | 4.066  | -1.7034 |
| CHB | TP53TG3 | 33031850 | 0.9943 | 3.7271 | -1.9853 |
| CHB | TP53TG3 | 33036850 | 1.0428 | 3.3883 | -1.8471 |
| CHB | TP53TG3 | 33041850 | 0.7282 | 2.8801 | -1.9402 |
| CHB | TP53TG3 | 33046850 | 0.1157 | 1.3553 | -2.009  |
| CHB | TP53TG3 | 33051850 | 0.9705 | 3.7271 | -2.0026 |
| CHB | TP53TG3 | 33056850 | 1.1315 | 4.7436 | -2.1307 |
| CHB | TP53TG3 | 33061850 | 1.0242 | 3.0495 | -1.7418 |
| CHB | TP53TG3 | 33066850 | 2.0299 | 2.8801 | -0.7665 |
| CHB | TP53TG3 | 33071850 | 2.9901 | 6.946  | -1.6605 |
| CHB | TP53TG3 | 33076850 | 1.8037 | 5.5907 | -1.9322 |
| CHB | TP53TG3 | 33081850 | 0.518  | 1.1859 | -1.1922 |
| CHB | TP53TG3 | 33086850 | 0.5542 | 1.1859 | -1.1276 |
| CHB | TP53TG3 | 33091850 | 1.0651 | 0.6777 | 1.0128  |
| CHB | TP53TG3 | 33096850 | 0.9812 | 0.5082 | 1.4848  |
| CHB | TP53TG3 | 33101850 | 0      | 0      | 0       |
| CHB | TP53TG3 | 33106850 | 0.3415 | 0.6777 | -0.8789 |
| CHB | TP53TG3 | 33111850 | 0.3415 | 0.6777 | -0.8789 |
| CHB | TP53TG3 | 33116850 | 0      | 0      | 0       |

## 2\_TajimasD\_data

|     |         |          |        |        |         |
|-----|---------|----------|--------|--------|---------|
| CHB | TP53TG3 | 33121850 | 0.0194 | 0.3388 | -1.2812 |
| CHB | TP53TG3 | 33126850 | 0.0194 | 0.3388 | -1.2812 |
| CHB | TP53TG3 | 33131850 | 0      | 0      | 0       |
| CHB | TP53TG3 | 33136850 | 0      | 0      | 0       |
| CHB | TP53TG3 | 33141850 | 0.6421 | 0.5082 | 0.4203  |
| CHB | TP53TG3 | 33146850 | 0.6421 | 0.5082 | 0.4203  |
| CHB | TP53TG3 | 33151850 | 0      | 0      | 0       |
| CHB | TP53TG3 | 33156850 | 0      | 0      | 0       |
| CHB | TP53TG3 | 33161850 | 0      | 0      | 0       |
| CHB | TP53TG3 | 33166850 | 0      | 0      | 0       |
| CHB | TP53TG3 | 33171850 | 0.0388 | 0.5082 | -1.4735 |
| CHB | TP53TG3 | 33176850 | 0.0388 | 0.5082 | -1.4735 |
| CHB | TP53TG3 | 33181850 | 0      | 0      | 0       |
| CHB | TP53TG3 | 33186850 | 0      | 0      | 0       |
| CHB | TP53TG3 | 33191850 | 0      | 0      | 0       |
| CHB | TP53TG3 | 33196850 | 0.0192 | 0.1694 | -0.8925 |
| CHB | TP53TG3 | 33201850 | 0.0192 | 0.1694 | -0.8925 |
| CHB | TP53TG3 | 33206850 | 0.4104 | 0.1694 | 1.4321  |
| CHB | TP53TG3 | 33211850 | 0.4104 | 0.1694 | 1.4321  |
| CHB | TP53TG3 | 33216850 | 0      | 0      | 0       |
| CHB | TP53TG3 | 33221850 | 0      | 0      | 0       |
| CHB | TP53TG3 | 33226850 | 0      | 0      | 0       |
| CHB | TP53TG3 | 33231850 | 0      | 0      | 0       |
| CHB | TP53TG3 | 33236850 | 0.6528 | 0.5082 | 0.4539  |
| CHB | TP53TG3 | 33241850 | 0.6528 | 0.5082 | 0.4539  |
| CHB | TP53TG3 | 33246850 | 0.0097 | 0.1694 | -0.949  |
| CHB | TP53TG3 | 33251850 | 0.0097 | 0.1694 | -0.949  |
| CHB | TP53TG3 | 33256850 | 0      | 0      | 0       |
| CHB | TP53TG3 | 33261850 | 0      | 0      | 0       |
| CHB | TP53TG3 | 33266850 | 0      | 0      | 0       |
| CHB | TP53TG3 | 33271850 | 0      | 0      | 0       |
| CHB | TP53TG3 | 33276850 | 0      | 0      | 0       |
| CHB | TP53TG3 | 33281850 | 0      | 0      | 0       |
| CHB | TP53TG3 | 33286850 | 0      | 0      | 0       |
| CHB | TP53TG3 | 33291850 | 1.6564 | 1.8636 | -0.2644 |
| CHB | TP53TG3 | 33296850 | 1.8294 | 2.5412 | -0.7108 |
| CHB | TP53TG3 | 33301850 | 1.5858 | 1.3553 | 0.3736  |
| CHB | TP53TG3 | 33306850 | 3.582  | 2.7106 | 0.8257  |
| CHB | TP53TG3 | 33311850 | 4.9751 | 5.2519 | -0.1493 |
| CHB | TP53TG3 | 33316850 | 4.8013 | 5.2519 | -0.243  |
| CHB | TP53TG3 | 33321850 | 3.297  | 5.0825 | -0.9913 |
| CHB | TP53TG3 | 33326850 | 1.9631 | 5.2519 | -1.7738 |
| CHB | TP53TG3 | 33331850 | 0.7973 | 3.7271 | -2.1284 |
| CHB | TP53TG3 | 33336850 | 0.7885 | 3.7271 | -2.1348 |
| CHB | TP53TG3 | 33341850 | 1.4653 | 4.7436 | -1.9338 |
| CHB | TP53TG3 | 33346850 | 2.0293 | 7.1154 | -2.0887 |
| CHB | TP53TG3 | 33351850 | 1.9808 | 7.9625 | -2.2166 |
| CHB | TP53TG3 | 33356850 | 2.0876 | 7.1154 | -2.0648 |
| CHB | TP53TG3 | 33361850 | 1.9623 | 7.2848 | -2.1395 |

## 2\_TajimasD\_data

|     |         |          |         |         |         |
|-----|---------|----------|---------|---------|---------|
| CHB | TP53TG3 | 33366850 | 1.8844  | 6.7766  | -2.1    |
| CHB | TP53TG3 | 33371850 | 1.562   | 6.2684  | -2.1676 |
| CHB | TP53TG3 | 33376850 | 1.9574  | 6.7766  | -2.0687 |
| CHB | TP53TG3 | 33381850 | 6.0272  | 7.9625  | -0.7172 |
| CHB | TP53TG3 | 33386850 | 6.7721  | 7.2848  | -0.2061 |
| CHB | TP53TG3 | 33391850 | 5.7445  | 6.2684  | -0.2413 |
| CHB | TP53TG3 | 33396850 | 5.4215  | 6.0989  | -0.3198 |
| CHB | TP53TG3 | 33401850 | 4.6349  | 5.9295  | -0.6267 |
| CHB | TP53TG3 | 33406850 | 4.0851  | 5.4213  | -0.7007 |
| CHB | TP53TG3 | 33411850 | 13.5628 | 9.3178  | 1.3607  |
| CHB | TP53TG3 | 33416850 | 23.2194 | 13.045  | 2.3791  |
| CHB | TP53TG3 | 33421850 | 18.7801 | 11.012  | 2.1307  |
| CHB | TP53TG3 | 33426850 | 12.0619 | 9.1484  | 0.9499  |
| CHB | TP53TG3 | 33431850 | 10.7925 | 9.9955  | 0.2393  |
| CHB | TP53TG3 | 33436850 | 10.2964 | 11.012  | -0.1963 |
| CHB | TP53TG3 | 33441850 | 9.2085  | 9.9955  | -0.2363 |
| CHB | TP53TG3 | 33446850 | 11.4917 | 10.8426 | 0.1806  |
| CHB | TP53TG3 | 33451850 | 8.1484  | 9.8261  | -0.5119 |
| CHB | TP53TG3 | 33456850 | 2.9734  | 7.2848  | -1.733  |
| CHB | TP53TG3 | 33461850 | 7.8458  | 10.6731 | -0.7985 |
| CHB | TP53TG3 | 33466850 | 11.2084 | 13.3838 | -0.4965 |
| CHB | TP53TG3 | 33471850 | 10.2766 | 13.045  | -0.6473 |
| CHB | TP53TG3 | 33476850 | 13.3188 | 11.1814 | 0.5779  |
| CHB | TP53TG3 | 33481850 | 15.9347 | 12.7061 | 0.774   |
| CHB | TP53TG3 | 33486850 | 11.9492 | 12.5367 | -0.1426 |
| CHB | TP53TG3 | 33491850 | 6.7394  | 7.6237  | -0.341  |
| CHB | TP53TG3 | 33496850 | 5.1784  | 7.1154  | -0.7955 |
| CHB | TP53TG3 | 33501850 | 4.8249  | 8.8096  | -1.3453 |
| CHB | TP53TG3 | 33506850 | 9.6602  | 11.012  | -0.3708 |
| CHB | TP53TG3 | 33511850 | 11.28   | 11.012  | 0.0735  |
| CHB | TP53TG3 | 33516850 | 7.7059  | 8.1319  | -0.1548 |
| CHB | TP53TG3 | 33521850 | 7.3213  | 6.0989  | 0.577   |
| CHB | TP53TG3 | 33526850 | 7.7571  | 6.7766  | 0.4209  |
| CHB | TP53TG3 | 33531850 | 7.1982  | 6.7766  | 0.181   |
| CHB | TP53TG3 | 33536850 | 8.4582  | 8.4708  | -0.0044 |
| CHB | TP53TG3 | 33541850 | 6.8972  | 7.9625  | -0.3948 |
| CHB | TP53TG3 | 33546850 | 6.3663  | 7.1154  | -0.3076 |
| CHB | TP53TG3 | 33551850 | 7.8536  | 8.1319  | -0.1012 |
| CHB | TP53TG3 | 33556850 | 5.9075  | 6.0989  | -0.0903 |
| CHB | TP53TG3 | 33561850 | 4.2728  | 4.5742  | -0.1835 |
| CHB | TP53TG3 | 33566850 | 7.2041  | 6.0989  | 0.5217  |
| CHB | TP53TG3 | 33571850 | 10.2469 | 9.4872  | 0.2395  |
| CHB | TP53TG3 | 33576850 | 6.5304  | 7.2848  | -0.3032 |
| CHB | TP53TG3 | 33581850 | 2.4418  | 4.4048  | -1.2352 |
| CHB | TP53TG3 | 33586850 | 2.7767  | 5.7601  | -1.4822 |
| CHB | TP53TG3 | 33591850 | 3.4889  | 6.2684  | -1.2801 |
| CHB | TP53TG3 | 33596850 | 2.6954  | 6.0989  | -1.6066 |
| CHB | TP53TG3 | 33601850 | 2.4264  | 6.6072  | -1.8363 |
| CHB | TP53TG3 | 33606850 | 2.7268  | 6.6072  | -1.7043 |

## 2\_TajimasD\_data

|     |         |          |        |         |         |
|-----|---------|----------|--------|---------|---------|
| CHB | TP53TG3 | 33611850 | 2.7645 | 5.5907  | -1.442  |
| CHB | TP53TG3 | 33616850 | 1.6189 | 5.0825  | -1.9229 |
| CHB | TP53TG3 | 33621850 | 1.0691 | 4.2354  | -2.0613 |
| CHB | TP53TG3 | 33626850 | 2.4047 | 4.066   | -1.1203 |
| CHB | TP53TG3 | 33631850 | 2.5287 | 3.2189  | -0.5674 |
| CHB | TP53TG3 | 33636850 | 2.3284 | 1.8636  | 0.593   |
| CHB | TP53TG3 | 33641850 | 1.9785 | 2.033   | -0.065  |
| CHB | TP53TG3 | 33646850 | 1.0994 | 2.5412  | -1.4397 |
| CHB | TP53TG3 | 33651850 | 0.6273 | 2.3718  | -1.8415 |
| CHB | TP53TG3 | 33656850 | 1.5037 | 2.7106  | -1.1436 |
| CHB | TP53TG3 | 33661850 | 2.1551 | 5.0825  | -1.6252 |
| CHB | TP53TG3 | 33666850 | 0.7773 | 3.7271  | -2.143  |
| CHB | TP53TG3 | 33671850 | 0.0676 | 0.5082  | -1.3831 |
| CHB | TP53TG3 | 33676850 | 0      | 0       | 0       |
| CHB | TP53TG3 | 33681850 | 0.0386 | 0.3388  | -1.2042 |
| CHB | TP53TG3 | 33686850 | 0.3617 | 1.1859  | -1.4712 |
| CHB | TP53TG3 | 33691850 | 0.9282 | 2.033   | -1.3175 |
| CHB | TP53TG3 | 33696850 | 0.8637 | 2.033   | -1.3944 |
| CHB | TP53TG3 | 33701850 | 0.6002 | 1.6942  | -1.5014 |
| CHB | TP53TG3 | 33706850 | 1.8825 | 3.3883  | -1.1859 |
| CHB | TP53TG3 | 33711850 | 2.355  | 5.4213  | -1.6079 |
| CHB | TP53TG3 | 33716850 | 2.5852 | 6.7766  | -1.7992 |
| CHB | TP53TG3 | 33721850 | 2.9577 | 6.7766  | -1.6393 |
| CHB | TP53TG3 | 33726850 | 1.6033 | 4.5742  | -1.809  |
| CHB | TP53TG3 | 33731850 | 2.8096 | 5.7601  | -1.4659 |
| CHB | TP53TG3 | 33736850 | 3.2559 | 6.6072  | -1.4719 |
| CHB | TP53TG3 | 33741850 | 1.1523 | 4.066   | -1.9648 |
| CHB | TP53TG3 | 33746850 | 1.3415 | 3.5577  | -1.6749 |
| CHB | TP53TG3 | 33751850 | 1.9996 | 3.3883  | -1.0936 |
| CHB | TP53TG3 | 33756850 | 1.795  | 1.8636  | -0.0875 |
| CHB | TP53TG3 | 33761850 | 2.4774 | 2.5412  | -0.0637 |
| CHB | TP53TG3 | 33766850 | 1.8856 | 3.2189  | -1.0962 |
| CHB | TP53TG3 | 33771850 | 2.3229 | 4.5742  | -1.3709 |
| CHB | TP53TG3 | 33776850 | 2.7645 | 4.2354  | -0.9576 |
| CHB | TP53TG3 | 33781850 | 2.2441 | 3.3883  | -0.9011 |
| CHB | TP53TG3 | 33786850 | 1.6532 | 4.066   | -1.627  |
| CHB | TP53TG3 | 33791850 | 1.2511 | 5.4213  | -2.1867 |
| CHB | TP53TG3 | 33796850 | 1.8433 | 6.2684  | -2.038  |
| CHB | TP53TG3 | 33801850 | 1.7714 | 3.7271  | -1.4208 |
| YRI | TP53TG3 | 32806850 | 0.1372 | 1.0084  | -1.7369 |
| YRI | TP53TG3 | 32811850 | 0.3387 | 1.1764  | -1.4983 |
| YRI | TP53TG3 | 32816850 | 4.3334 | 9.9157  | -1.6831 |
| YRI | TP53TG3 | 32821850 | 7.2513 | 16.302  | -1.7062 |
| YRI | TP53TG3 | 32826850 | 6.4567 | 13.445  | -1.5826 |
| YRI | TP53TG3 | 32831850 | 5.2105 | 11.2602 | -1.6195 |
| YRI | TP53TG3 | 32836850 | 4.7501 | 10.5879 | -1.6556 |
| YRI | TP53TG3 | 32841850 | 7.687  | 13.2769 | -1.2811 |
| YRI | TP53TG3 | 32846850 | 6.3967 | 12.1005 | -1.427  |
| YRI | TP53TG3 | 32851850 | 5.1984 | 12.2685 | -1.7459 |

## 2\_TajimasD\_data

|     |         |          |        |         |         |
|-----|---------|----------|--------|---------|---------|
| YRI | TP53TG3 | 32856850 | 6.5809 | 12.9408 | -1.4934 |
| YRI | TP53TG3 | 32861850 | 4.0326 | 7.0586  | -1.2475 |
| YRI | TP53TG3 | 32866850 | 2.6123 | 2.8571  | -0.2214 |
| YRI | TP53TG3 | 32871850 | 2.8508 | 3.0251  | -0.1504 |
| YRI | TP53TG3 | 32876850 | 2.5141 | 6.5544  | -1.7813 |
| YRI | TP53TG3 | 32881850 | 1.913  | 7.2267  | -2.1442 |
| YRI | TP53TG3 | 32886850 | 2.4303 | 5.8822  | -1.6773 |
| YRI | TP53TG3 | 32891850 | 3.8919 | 6.7225  | -1.2197 |
| YRI | TP53TG3 | 32896850 | 3.0145 | 5.0419  | -1.1296 |
| YRI | TP53TG3 | 32901850 | 2.5777 | 6.5544  | -1.7532 |
| YRI | TP53TG3 | 32906850 | 3.2552 | 8.067   | -1.7559 |
| YRI | TP53TG3 | 32911850 | 3.01   | 7.8989  | -1.8188 |
| YRI | TP53TG3 | 32916850 | 3.3657 | 8.9073  | -1.8457 |
| YRI | TP53TG3 | 32921850 | 3.231  | 8.9073  | -1.8905 |
| YRI | TP53TG3 | 32926850 | 3.3144 | 10.924  | -2.0958 |
| YRI | TP53TG3 | 32931850 | 4.0478 | 11.4282 | -1.9485 |
| YRI | TP53TG3 | 32936850 | 3.4533 | 9.2434  | -1.8634 |
| YRI | TP53TG3 | 32941850 | 3.5806 | 9.2434  | -1.8224 |
| YRI | TP53TG3 | 32946850 | 3.0205 | 9.4115  | -2.0227 |
| YRI | TP53TG3 | 32951850 | 4.5923 | 10.756  | -1.7224 |
| YRI | TP53TG3 | 32956850 | 6.6439 | 11.2602 | -1.2358 |
| YRI | TP53TG3 | 32961850 | 3.1534 | 5.8822  | -1.326  |
| YRI | TP53TG3 | 32966850 | 1.2856 | 2.0167  | -0.8741 |
| YRI | TP53TG3 | 32971850 | 2.0094 | 4.2016  | -1.432  |
| YRI | TP53TG3 | 32976850 | 1.9896 | 5.378   | -1.7832 |
| YRI | TP53TG3 | 32981850 | 1.304  | 2.689   | -1.3162 |
| YRI | TP53TG3 | 32986850 | 0.3633 | 0.8403  | -1.0774 |
| YRI | TP53TG3 | 32991850 | 0.1533 | 0.6722  | -1.3584 |
| YRI | TP53TG3 | 32996850 | 0.9557 | 2.689   | -1.6473 |
| YRI | TP53TG3 | 33001850 | 1.7065 | 6.8906  | -2.1844 |
| YRI | TP53TG3 | 33006850 | 1.2282 | 6.2183  | -2.3069 |
| YRI | TP53TG3 | 33011850 | 0.911  | 3.6974  | -2.0309 |
| YRI | TP53TG3 | 33016850 | 1.047  | 5.2099  | -2.2533 |
| YRI | TP53TG3 | 33021850 | 1.3883 | 6.2183  | -2.2329 |
| YRI | TP53TG3 | 33026850 | 1.8183 | 4.7057  | -1.7092 |
| YRI | TP53TG3 | 33031850 | 1.3539 | 3.8654  | -1.7625 |
| YRI | TP53TG3 | 33036850 | 1.9938 | 7.3947  | -2.1342 |
| YRI | TP53TG3 | 33041850 | 1.7783 | 6.0502  | -2.0241 |
| YRI | TP53TG3 | 33046850 | 1.0472 | 2.3529  | -1.3821 |
| YRI | TP53TG3 | 33051850 | 1.9228 | 5.8822  | -1.9239 |
| YRI | TP53TG3 | 33056850 | 2.2681 | 8.7392  | -2.1935 |
| YRI | TP53TG3 | 33061850 | 1.8329 | 6.0502  | -1.9982 |
| YRI | TP53TG3 | 33066850 | 3.4265 | 7.0586  | -1.4973 |
| YRI | TP53TG3 | 33071850 | 4.1296 | 10.0837 | -1.7673 |
| YRI | TP53TG3 | 33076850 | 1.5297 | 5.2099  | -1.992  |
| YRI | TP53TG3 | 33081850 | 0.5075 | 2.0167  | -1.8045 |
| YRI | TP53TG3 | 33086850 | 0.4065 | 2.0167  | -1.9252 |
| YRI | TP53TG3 | 33091850 | 0.1195 | 1.0084  | -1.7722 |
| YRI | TP53TG3 | 33096850 | 0.0736 | 0.6722  | -1.5671 |

## 2\_TajimasD\_data

|     |         |          |        |        |         |
|-----|---------|----------|--------|--------|---------|
| YRI | TP53TG3 | 33101850 | 0.0276 | 0.1681 | -0.8352 |
| YRI | TP53TG3 | 33106850 | 0.4968 | 0.5042 | -0.0233 |
| YRI | TP53TG3 | 33111850 | 0.5061 | 0.8403 | -0.7548 |
| YRI | TP53TG3 | 33116850 | 0.0369 | 0.5042 | -1.4686 |
| YRI | TP53TG3 | 33121850 | 0      | 0      | 0       |
| YRI | TP53TG3 | 33126850 | 0      | 0      | 0       |
| YRI | TP53TG3 | 33131850 | 0      | 0      | 0       |
| YRI | TP53TG3 | 33136850 | 0      | 0      | 0       |
| YRI | TP53TG3 | 33141850 | 1.0444 | 1.3445 | -0.4874 |
| YRI | TP53TG3 | 33146850 | 1.0444 | 1.3445 | -0.4874 |
| YRI | TP53TG3 | 33151850 | 0      | 0      | 0       |
| YRI | TP53TG3 | 33156850 | 0      | 0      | 0       |
| YRI | TP53TG3 | 33161850 | 0      | 0      | 0       |
| YRI | TP53TG3 | 33166850 | 0      | 0      | 0       |
| YRI | TP53TG3 | 33171850 | 0.046  | 0.3361 | -1.1646 |
| YRI | TP53TG3 | 33176850 | 0.046  | 0.3361 | -1.1646 |
| YRI | TP53TG3 | 33181850 | 0      | 0      | 0       |
| YRI | TP53TG3 | 33186850 | 0      | 0      | 0       |
| YRI | TP53TG3 | 33191850 | 0      | 0      | 0       |
| YRI | TP53TG3 | 33196850 | 0      | 0      | 0       |
| YRI | TP53TG3 | 33201850 | 0.0276 | 0.1681 | -0.8352 |
| YRI | TP53TG3 | 33206850 | 0.0814 | 0.3361 | -1.0225 |
| YRI | TP53TG3 | 33211850 | 0.0538 | 0.1681 | -0.6795 |
| YRI | TP53TG3 | 33216850 | 0      | 0      | 0       |
| YRI | TP53TG3 | 33221850 | 0      | 0      | 0       |
| YRI | TP53TG3 | 33226850 | 0      | 0      | 0       |
| YRI | TP53TG3 | 33231850 | 0      | 0      | 0       |
| YRI | TP53TG3 | 33236850 | 1.0032 | 0.5042 | 1.5682  |
| YRI | TP53TG3 | 33241850 | 1.0125 | 0.6722 | 0.8909  |
| YRI | TP53TG3 | 33246850 | 0.0093 | 0.1681 | -0.944  |
| YRI | TP53TG3 | 33251850 | 0      | 0      | 0       |
| YRI | TP53TG3 | 33256850 | 0      | 0      | 0       |
| YRI | TP53TG3 | 33261850 | 0      | 0      | 0       |
| YRI | TP53TG3 | 33266850 | 0      | 0      | 0       |
| YRI | TP53TG3 | 33271850 | 0      | 0      | 0       |
| YRI | TP53TG3 | 33276850 | 0      | 0      | 0       |
| YRI | TP53TG3 | 33281850 | 0      | 0      | 0       |
| YRI | TP53TG3 | 33286850 | 0      | 0      | 0       |
| YRI | TP53TG3 | 33291850 | 1.877  | 4.2016 | -1.5185 |
| YRI | TP53TG3 | 33296850 | 2.1295 | 5.7141 | -1.7875 |
| YRI | TP53TG3 | 33301850 | 1.8823 | 2.8571 | -0.8816 |
| YRI | TP53TG3 | 33306850 | 4.2024 | 4.5377 | -0.2049 |
| YRI | TP53TG3 | 33311850 | 5.048  | 6.7225 | -0.7215 |
| YRI | TP53TG3 | 33316850 | 4.9091 | 7.3947 | -0.9822 |
| YRI | TP53TG3 | 33321850 | 4.241  | 7.5628 | -1.286  |
| YRI | TP53TG3 | 33326850 | 3.3794 | 7.2267 | -1.5525 |
| YRI | TP53TG3 | 33331850 | 2.2943 | 5.2099 | -1.5782 |
| YRI | TP53TG3 | 33336850 | 2.2536 | 5.7141 | -1.7256 |
| YRI | TP53TG3 | 33341850 | 2.7208 | 8.4031 | -1.9971 |

## 2\_TajimasD\_data

|     |         |          |         |         |         |
|-----|---------|----------|---------|---------|---------|
| YRI | TP53TG3 | 33346850 | 2.5969  | 11.5963 | -2.3435 |
| YRI | TP53TG3 | 33351850 | 2.9939  | 12.4366 | -2.3021 |
| YRI | TP53TG3 | 33356850 | 3.7152  | 11.9324 | -2.083  |
| YRI | TP53TG3 | 33361850 | 3.9432  | 12.7727 | -2.0991 |
| YRI | TP53TG3 | 33366850 | 3.7126  | 10.924  | -1.9862 |
| YRI | TP53TG3 | 33371850 | 5.9877  | 15.6298 | -1.8923 |
| YRI | TP53TG3 | 33376850 | 7.9482  | 19.9994 | -1.8672 |
| YRI | TP53TG3 | 33381850 | 8.1931  | 14.1172 | -1.281  |
| YRI | TP53TG3 | 33386850 | 7.3484  | 8.5712  | -0.422  |
| YRI | TP53TG3 | 33391850 | 6.8033  | 8.5712  | -0.6101 |
| YRI | TP53TG3 | 33396850 | 6.8609  | 9.7476  | -0.8843 |
| YRI | TP53TG3 | 33401850 | 5.9914  | 8.5712  | -0.8903 |
| YRI | TP53TG3 | 33406850 | 4.6571  | 7.5628  | -1.1249 |
| YRI | TP53TG3 | 33411850 | 15.244  | 11.7644 | 0.8939  |
| YRI | TP53TG3 | 33416850 | 26.2026 | 17.1423 | 1.6279  |
| YRI | TP53TG3 | 33421850 | 20.4279 | 14.2853 | 1.3133  |
| YRI | TP53TG3 | 33426850 | 14.0757 | 12.2685 | 0.4463  |
| YRI | TP53TG3 | 33431850 | 14.8699 | 17.9827 | -0.5342 |
| YRI | TP53TG3 | 33436850 | 13.5499 | 17.6465 | -0.7159 |
| YRI | TP53TG3 | 33441850 | 12.438  | 13.7811 | -0.2971 |
| YRI | TP53TG3 | 33446850 | 15.3861 | 14.1172 | 0.2744  |
| YRI | TP53TG3 | 33451850 | 10.33   | 11.9324 | -0.4062 |
| YRI | TP53TG3 | 33456850 | 5.0389  | 9.9157  | -1.4704 |
| YRI | TP53TG3 | 33461850 | 12.4312 | 12.6047 | -0.0418 |
| YRI | TP53TG3 | 33466850 | 17.2548 | 17.6465 | -0.0684 |
| YRI | TP53TG3 | 33471850 | 16.7881 | 18.4868 | -0.2839 |
| YRI | TP53TG3 | 33476850 | 16.7817 | 15.2937 | 0.2982  |
| YRI | TP53TG3 | 33481850 | 20.8872 | 17.1423 | 0.6728  |
| YRI | TP53TG3 | 33486850 | 18.0395 | 16.8062 | 0.2258  |
| YRI | TP53TG3 | 33491850 | 8.2786  | 11.2602 | -0.7982 |
| YRI | TP53TG3 | 33496850 | 6.5755  | 10.0837 | -1.0413 |
| YRI | TP53TG3 | 33501850 | 8.1141  | 11.7644 | -0.9378 |
| YRI | TP53TG3 | 33506850 | 14.5449 | 13.9492 | 0.1303  |
| YRI | TP53TG3 | 33511850 | 16.7647 | 13.9492 | 0.6158  |
| YRI | TP53TG3 | 33516850 | 11.5356 | 11.2602 | 0.0737  |
| YRI | TP53TG3 | 33521850 | 9.0788  | 11.2602 | -0.584  |
| YRI | TP53TG3 | 33526850 | 9.2517  | 10.924  | -0.4606 |
| YRI | TP53TG3 | 33531850 | 8.9606  | 9.7476  | -0.2411 |
| YRI | TP53TG3 | 33536850 | 11.7749 | 11.4282 | 0.0915  |
| YRI | TP53TG3 | 33541850 | 10.7717 | 11.5963 | -0.2147 |
| YRI | TP53TG3 | 33546850 | 9.545   | 11.0921 | -0.42   |
| YRI | TP53TG3 | 33551850 | 10.4982 | 11.0921 | -0.1612 |
| YRI | TP53TG3 | 33556850 | 8.6212  | 9.7476  | -0.3451 |
| YRI | TP53TG3 | 33561850 | 7.018   | 8.067   | -0.3828 |
| YRI | TP53TG3 | 33566850 | 9.174   | 10.4199 | -0.3587 |
| YRI | TP53TG3 | 33571850 | 13.1529 | 15.1256 | -0.3995 |
| YRI | TP53TG3 | 33576850 | 11.5359 | 13.9492 | -0.5278 |
| YRI | TP53TG3 | 33581850 | 7.3969  | 10.5879 | -0.905  |
| YRI | TP53TG3 | 33586850 | 10.219  | 13.9492 | -0.8158 |

## 2\_TajimasD\_data

|     |         |          |         |         |         |
|-----|---------|----------|---------|---------|---------|
| YRI | TP53TG3 | 33591850 | 16.5237 | 16.9743 | -0.0817 |
| YRI | TP53TG3 | 33596850 | 18.4119 | 15.9659 | 0.4704  |
| YRI | TP53TG3 | 33601850 | 19.0496 | 17.6465 | 0.2452  |
| YRI | TP53TG3 | 33606850 | 20.5086 | 21.0078 | -0.0738 |
| YRI | TP53TG3 | 33611850 | 21.3647 | 20.8397 | 0.0782  |
| YRI | TP53TG3 | 33616850 | 18.8701 | 18.3188 | 0.0929  |
| YRI | TP53TG3 | 33621850 | 13.3428 | 14.9575 | -0.3305 |
| YRI | TP53TG3 | 33626850 | 7.6943  | 11.4282 | -0.9858 |
| YRI | TP53TG3 | 33631850 | 4.4203  | 7.5628  | -1.2166 |
| YRI | TP53TG3 | 33636850 | 3.7579  | 5.378   | -0.8526 |
| YRI | TP53TG3 | 33641850 | 2.8609  | 5.378   | -1.3247 |
| YRI | TP53TG3 | 33646850 | 4.2253  | 7.0586  | -1.168  |
| YRI | TP53TG3 | 33651850 | 5.1738  | 8.235   | -1.0961 |
| YRI | TP53TG3 | 33656850 | 4.0376  | 6.3864  | -1.0601 |
| YRI | TP53TG3 | 33661850 | 5.1117  | 7.8989  | -1.0369 |
| YRI | TP53TG3 | 33666850 | 2.9759  | 5.2099  | -1.2092 |
| YRI | TP53TG3 | 33671850 | 0.2137  | 1.1764  | -1.7218 |
| YRI | TP53TG3 | 33676850 | 0.2137  | 1.0084  | -1.5844 |
| YRI | TP53TG3 | 33681850 | 0.0276  | 0.1681  | -0.8352 |
| YRI | TP53TG3 | 33686850 | 1.2934  | 1.1764  | 0.2093  |
| YRI | TP53TG3 | 33691850 | 3.0676  | 2.8571  | 0.1904  |
| YRI | TP53TG3 | 33696850 | 2.6269  | 3.1932  | -0.467  |
| YRI | TP53TG3 | 33701850 | 1.1777  | 2.689   | -1.4363 |
| YRI | TP53TG3 | 33706850 | 1.8384  | 6.8906  | -2.1288 |
| YRI | TP53TG3 | 33711850 | 2.8323  | 10.2518 | -2.1685 |
| YRI | TP53TG3 | 33716850 | 3.8593  | 9.0754  | -1.7075 |
| YRI | TP53TG3 | 33721850 | 5.8067  | 9.9157  | -1.2389 |
| YRI | TP53TG3 | 33726850 | 4.2584  | 7.8989  | -1.3543 |
| YRI | TP53TG3 | 33731850 | 4.4568  | 7.3947  | -1.1609 |
| YRI | TP53TG3 | 33736850 | 6.0682  | 9.9157  | -1.16   |
| YRI | TP53TG3 | 33741850 | 3.149   | 8.235   | -1.8211 |
| YRI | TP53TG3 | 33746850 | 1.8085  | 6.0502  | -2.0097 |
| YRI | TP53TG3 | 33751850 | 2.1689  | 4.8738  | -1.5527 |
| YRI | TP53TG3 | 33756850 | 1.326   | 3.0251  | -1.4657 |
| YRI | TP53TG3 | 33761850 | 3.1907  | 4.3696  | -0.7444 |
| YRI | TP53TG3 | 33766850 | 3.5568  | 4.8738  | -0.756  |
| YRI | TP53TG3 | 33771850 | 3.5309  | 6.0502  | -1.1937 |
| YRI | TP53TG3 | 33776850 | 3.9407  | 6.2183  | -1.0529 |
| YRI | TP53TG3 | 33781850 | 3.5265  | 5.5461  | -1.0342 |
| YRI | TP53TG3 | 33786850 | 4.0322  | 7.0586  | -1.2476 |
| YRI | TP53TG3 | 33791850 | 4.7463  | 9.0754  | -1.4171 |
| YRI | TP53TG3 | 33796850 | 10.3158 | 13.2769 | -0.6786 |
| YRI | TP53TG3 | 33801850 | 8.8148  | 10.2518 | -0.42   |
| CEU | TP53TG3 | 32865841 | 1.4414  | 2.0467  | -0.7202 |
| CEU | TP53TG3 | 32870841 | 1.6378  | 1.8762  | -0.3035 |
| CEU | TP53TG3 | 32875841 | 2.0188  | 3.5818  | -1.178  |
| CEU | TP53TG3 | 32880841 | 1.5263  | 3.7524  | -1.6128 |
| CEU | TP53TG3 | 32885841 | 0.9002  | 3.7524  | -2.0664 |
| CEU | TP53TG3 | 32890841 | 1.9439  | 5.458   | -1.8371 |



## 2\_TajimasD\_data

|     |         |          |        |        |         |
|-----|---------|----------|--------|--------|---------|
| CEU | TP53TG3 | 32895841 | 3.1905 | 3.9229 | -0.5108 |
| CEU | TP53TG3 | 32900841 | 2.7997 | 2.8996 | -0.0898 |
| CEU | TP53TG3 | 32905841 | 2.1413 | 4.2641 | -1.378  |
| CEU | TP53TG3 | 32910841 | 1.3577 | 5.7991 | -2.1998 |
| CEU | TP53TG3 | 32915841 | 1.2995 | 5.6286 | -2.202  |
| CEU | TP53TG3 | 32920841 | 1.0247 | 3.4112 | -1.8744 |
| CEU | TP53TG3 | 32925841 | 1.323  | 4.6052 | -1.9928 |
| CEU | TP53TG3 | 32930841 | 2.6009 | 5.7991 | -1.584  |
| CEU | TP53TG3 | 32935841 | 1.7716 | 4.4346 | -1.6709 |
| CEU | TP53TG3 | 32940841 | 1.5727 | 4.2641 | -1.7471 |
| CEU | TP53TG3 | 32945841 | 1.8563 | 5.6286 | -1.9188 |
| CEU | TP53TG3 | 32950841 | 2.1828 | 6.1402 | -1.8622 |
| CEU | TP53TG3 | 32955841 | 3.7545 | 8.187  | -1.6058 |
| CEU | TP53TG3 | 32960841 | 2.1649 | 6.1402 | -1.8707 |
| CEU | TP53TG3 | 32965841 | 0.8881 | 2.5584 | -1.6639 |
| CEU | TP53TG3 | 32970841 | 2.2352 | 3.5818 | -1.0149 |
| CEU | TP53TG3 | 32975841 | 1.7506 | 2.8996 | -1.0333 |
| CEU | TP53TG3 | 32980841 | 0.384  | 1.7056 | -1.8101 |
| CEU | TP53TG3 | 32985841 | 0.7098 | 1.3645 | -1.0592 |
| CEU | TP53TG3 | 32990841 | 0.6597 | 1.1939 | -0.952  |
| CEU | TP53TG3 | 32995841 | 0.1703 | 1.5351 | -2.0237 |
| CEU | TP53TG3 | 33000841 | 1.2146 | 3.4112 | -1.7252 |
| CEU | TP53TG3 | 33005841 | 1.1245 | 2.729  | -1.5166 |
| CEU | TP53TG3 | 33010841 | 0.2562 | 1.7056 | -1.9851 |
| CEU | TP53TG3 | 33015841 | 0.4152 | 3.0701 | -2.2773 |
| CEU | TP53TG3 | 33020841 | 0.4636 | 3.0701 | -2.2358 |
| CEU | TP53TG3 | 33025841 | 1.3828 | 3.0701 | -1.4473 |
| CEU | TP53TG3 | 33030841 | 1.1952 | 1.8762 | -0.867  |
| CEU | TP53TG3 | 33035841 | 1.2037 | 2.8996 | -1.5252 |
| CEU | TP53TG3 | 33040841 | 1.3105 | 3.5818 | -1.7119 |
| CEU | TP53TG3 | 33045841 | 0.5075 | 1.5351 | -1.5237 |
| CEU | TP53TG3 | 33050841 | 0.8986 | 2.5584 | -1.6534 |
| CEU | TP53TG3 | 33055841 | 0.9204 | 3.9229 | -2.0942 |
| CEU | TP53TG3 | 33060841 | 1.067  | 4.4346 | -2.1129 |
| CEU | TP53TG3 | 33065841 | 1.8031 | 4.9463 | -1.7926 |
| CEU | TP53TG3 | 33070841 | 2.3873 | 5.6286 | -1.6487 |
| CEU | TP53TG3 | 33075841 | 1.9579 | 4.2641 | -1.4971 |
| CEU | TP53TG3 | 33080841 | 0.8701 | 1.8762 | -1.2809 |
| CEU | TP53TG3 | 33085841 | 0.2478 | 0.8528 | -1.3624 |
| CEU | TP53TG3 | 33090841 | 0.8306 | 0.8528 | -0.05   |
| CEU | TP53TG3 | 33095841 | 0.8306 | 0.8528 | -0.05   |
| CEU | TP53TG3 | 33100841 | 0      | 0      | 0       |
| CEU | TP53TG3 | 33105841 | 0.4482 | 0.3411 | 0.4293  |
| CEU | TP53TG3 | 33110841 | 0.4482 | 0.3411 | 0.4293  |
| CEU | TP53TG3 | 33115841 | 0.0503 | 0.5117 | -1.4471 |
| CEU | TP53TG3 | 33120841 | 0.1391 | 1.1939 | -1.8797 |
| CEU | TP53TG3 | 33125841 | 0.0888 | 0.6822 | -1.5495 |
| CEU | TP53TG3 | 33130841 | 0      | 0      | 0       |
| CEU | TP53TG3 | 33135841 | 0      | 0      | 0       |

## 2\_TajimasD\_data

|     |         |          |        |         |         |
|-----|---------|----------|--------|---------|---------|
| CEU | TP53TG3 | 33140841 | 0.7326 | 0.5117  | 0.6928  |
| CEU | TP53TG3 | 33145841 | 0.7326 | 0.5117  | 0.6928  |
| CEU | TP53TG3 | 33150841 | 0      | 0       | 0       |
| CEU | TP53TG3 | 33155841 | 0      | 0       | 0       |
| CEU | TP53TG3 | 33160841 | 0      | 0       | 0       |
| CEU | TP53TG3 | 33165841 | 0      | 0       | 0       |
| CEU | TP53TG3 | 33170841 | 0.059  | 0.1706  | -0.6629 |
| CEU | TP53TG3 | 33175841 | 0.059  | 0.1706  | -0.6629 |
| CEU | TP53TG3 | 33180841 | 0      | 0       | 0       |
| CEU | TP53TG3 | 33185841 | 0      | 0       | 0       |
| CEU | TP53TG3 | 33190841 | 0      | 0       | 0       |
| CEU | TP53TG3 | 33195841 | 0      | 0       | 0       |
| CEU | TP53TG3 | 33200841 | 0.0202 | 0.1706  | -0.8934 |
| CEU | TP53TG3 | 33205841 | 0.0202 | 0.1706  | -0.8934 |
| CEU | TP53TG3 | 33210841 | 0      | 0       | 0       |
| CEU | TP53TG3 | 33215841 | 0      | 0       | 0       |
| CEU | TP53TG3 | 33220841 | 0      | 0       | 0       |
| CEU | TP53TG3 | 33225841 | 0      | 0       | 0       |
| CEU | TP53TG3 | 33230841 | 0      | 0       | 0       |
| CEU | TP53TG3 | 33235841 | 0.0101 | 0.1706  | -0.9534 |
| CEU | TP53TG3 | 33240841 | 1.0237 | 0.6822  | 0.8918  |
| CEU | TP53TG3 | 33245841 | 1.0136 | 0.5117  | 1.5741  |
| CEU | TP53TG3 | 33250841 | 0      | 0       | 0       |
| CEU | TP53TG3 | 33255841 | 0      | 0       | 0       |
| CEU | TP53TG3 | 33260841 | 0      | 0       | 0       |
| CEU | TP53TG3 | 33265841 | 0      | 0       | 0       |
| CEU | TP53TG3 | 33270841 | 0      | 0       | 0       |
| CEU | TP53TG3 | 33275841 | 0      | 0       | 0       |
| CEU | TP53TG3 | 33280841 | 0      | 0       | 0       |
| CEU | TP53TG3 | 33285841 | 0      | 0       | 0       |
| CEU | TP53TG3 | 33290841 | 1.2719 | 1.1939  | 0.139   |
| CEU | TP53TG3 | 33295841 | 1.9167 | 2.3879  | -0.4962 |
| CEU | TP53TG3 | 33300841 | 1.2628 | 2.5584  | -1.2906 |
| CEU | TP53TG3 | 33305841 | 3.315  | 3.2407  | 0.0609  |
| CEU | TP53TG3 | 33310841 | 5.6761 | 4.9463  | 0.4162  |
| CEU | TP53TG3 | 33315841 | 4.8468 | 5.458   | -0.3195 |
| CEU | TP53TG3 | 33320841 | 4.1049 | 4.2641  | -0.1033 |
| CEU | TP53TG3 | 33325841 | 2.7289 | 3.4112  | -0.5359 |
| CEU | TP53TG3 | 33330841 | 1.1274 | 3.0701  | -1.6664 |
| CEU | TP53TG3 | 33335841 | 1.0122 | 4.2641  | -2.1109 |
| CEU | TP53TG3 | 33340841 | 1.4778 | 4.9463  | -1.9781 |
| CEU | TP53TG3 | 33345841 | 2.1752 | 5.7991  | -1.7949 |
| CEU | TP53TG3 | 33350841 | 2.4304 | 6.6519  | -1.8483 |
| CEU | TP53TG3 | 33355841 | 2.1868 | 5.6286  | -1.7507 |
| CEU | TP53TG3 | 33360841 | 1.8068 | 6.1402  | -2.0392 |
| CEU | TP53TG3 | 33365841 | 2.1396 | 7.6753  | -2.1278 |
| CEU | TP53TG3 | 33370841 | 2.0804 | 8.6987  | -2.2674 |
| CEU | TP53TG3 | 33375841 | 3.0489 | 14.1567 | -2.4105 |
| CEU | TP53TG3 | 33380841 | 6.4515 | 13.645  | -1.6166 |

## 2\_TajimasD\_data

|     |         |          |         |         |         |
|-----|---------|----------|---------|---------|---------|
| CEU | TP53TG3 | 33385841 | 6.0557  | 5.9697  | 0.0415  |
| CEU | TP53TG3 | 33390841 | 4.9776  | 5.6286  | -0.3311 |
| CEU | TP53TG3 | 33395841 | 5.4384  | 7.5047  | -0.8107 |
| CEU | TP53TG3 | 33400841 | 4.0627  | 6.9931  | -1.2261 |
| CEU | TP53TG3 | 33405841 | 4.7656  | 6.8225  | -0.8801 |
| CEU | TP53TG3 | 33410841 | 13.1938 | 10.2337 | 0.8721  |
| CEU | TP53TG3 | 33415841 | 22.0827 | 12.4511 | 2.3604  |
| CEU | TP53TG3 | 33420841 | 21.6943 | 11.4277 | 2.7276  |
| CEU | TP53TG3 | 33425841 | 14.0497 | 9.3809  | 1.4915  |
| CEU | TP53TG3 | 33430841 | 9.8916  | 9.2104  | 0.2214  |
| CEU | TP53TG3 | 33435841 | 11.2562 | 10.4043 | 0.2471  |
| CEU | TP53TG3 | 33440841 | 9.202   | 7.8459  | 0.5109  |
| CEU | TP53TG3 | 33445841 | 10.1211 | 9.8926  | 0.0695  |
| CEU | TP53TG3 | 33450841 | 9.6593  | 11.5982 | -0.508  |
| CEU | TP53TG3 | 33455841 | 5.4638  | 9.0398  | -1.1823 |
| CEU | TP53TG3 | 33460841 | 8.3696  | 10.2337 | -0.5492 |
| CEU | TP53TG3 | 33465841 | 12.6111 | 12.2805 | 0.0821  |
| CEU | TP53TG3 | 33470841 | 13.2474 | 12.9627 | 0.0672  |
| CEU | TP53TG3 | 33475841 | 12.0187 | 11.5982 | 0.1102  |
| CEU | TP53TG3 | 33480841 | 17.0211 | 13.1333 | 0.9059  |
| CEU | TP53TG3 | 33485841 | 15.0931 | 12.7922 | 0.5497  |
| CEU | TP53TG3 | 33490841 | 7.6935  | 9.2104  | -0.4929 |
| CEU | TP53TG3 | 33495841 | 6.4801  | 7.3342  | -0.3422 |
| CEU | TP53TG3 | 33500841 | 5.0155  | 7.3342  | -0.929  |
| CEU | TP53TG3 | 33505841 | 8.8588  | 10.0632 | -0.3604 |
| CEU | TP53TG3 | 33510841 | 12.4162 | 11.7688 | 0.1673  |
| CEU | TP53TG3 | 33515841 | 9.7949  | 10.7454 | -0.2675 |
| CEU | TP53TG3 | 33520841 | 7.9356  | 9.5515  | -0.5077 |
| CEU | TP53TG3 | 33525841 | 8.4159  | 8.6987  | -0.0969 |
| CEU | TP53TG3 | 33530841 | 7.5723  | 6.9931  | 0.2423  |
| CEU | TP53TG3 | 33535841 | 9.3762  | 8.187   | 0.4308  |
| CEU | TP53TG3 | 33540841 | 9.2833  | 8.8692  | 0.1393  |
| CEU | TP53TG3 | 33545841 | 7.788   | 8.187   | -0.1445 |
| CEU | TP53TG3 | 33550841 | 6.9448  | 7.6753  | -0.2808 |
| CEU | TP53TG3 | 33555841 | 7.2315  | 7.3342  | -0.0411 |
| CEU | TP53TG3 | 33560841 | 5.9171  | 5.1169  | 0.4429  |
| CEU | TP53TG3 | 33565841 | 6.4583  | 6.1402  | 0.1497  |
| CEU | TP53TG3 | 33570841 | 12.4886 | 10.4043 | 0.6046  |
| CEU | TP53TG3 | 33575841 | 9.1194  | 8.3576  | 0.2708  |
| CEU | TP53TG3 | 33580841 | 2.5993  | 7.1636  | -1.8684 |
| CEU | TP53TG3 | 33585841 | 2.9932  | 9.2104  | -2.0203 |
| CEU | TP53TG3 | 33590841 | 4.101   | 12.1099 | -2.0148 |
| CEU | TP53TG3 | 33595841 | 3.8161  | 13.645  | -2.2088 |
| CEU | TP53TG3 | 33600841 | 3.2243  | 16.0329 | -2.4688 |
| CEU | TP53TG3 | 33605841 | 4.1969  | 14.3272 | -2.1735 |
| CEU | TP53TG3 | 33610841 | 5.0664  | 10.0632 | -1.4954 |
| CEU | TP53TG3 | 33615841 | 3.9866  | 12.2805 | -2.0592 |
| CEU | TP53TG3 | 33620841 | 2.8918  | 11.4277 | -2.2678 |
| CEU | TP53TG3 | 33625841 | 3.3123  | 7.3342  | -1.6115 |

## 2\_TajimasD\_data

|     |         |          |        |         |         |
|-----|---------|----------|--------|---------|---------|
| CEU | TP53TG3 | 33630841 | 3.4859 | 5.7991  | -1.1457 |
| CEU | TP53TG3 | 33635841 | 1.927  | 3.7524  | -1.3225 |
| CEU | TP53TG3 | 33640841 | 2.1845 | 3.5818  | -1.0531 |
| CEU | TP53TG3 | 33645841 | 2.6046 | 6.8225  | -1.8048 |
| CEU | TP53TG3 | 33650841 | 1.0538 | 5.7991  | -2.3503 |
| CEU | TP53TG3 | 33655841 | 0.8543 | 4.2641  | -2.2134 |
| CEU | TP53TG3 | 33660841 | 2.1855 | 5.7991  | -1.7898 |
| CEU | TP53TG3 | 33665841 | 1.6096 | 4.4346  | -1.7725 |
| CEU | TP53TG3 | 33670841 | 0.101  | 1.5351  | -2.1265 |
| CEU | TP53TG3 | 33675841 | 0.0202 | 0.3411  | -1.2864 |
| CEU | TP53TG3 | 33680841 | 0.0101 | 0.1706  | -0.9534 |
| CEU | TP53TG3 | 33685841 | 0.7761 | 1.0234  | -0.4914 |
| CEU | TP53TG3 | 33690841 | 1.5951 | 2.0467  | -0.5374 |
| CEU | TP53TG3 | 33695841 | 1.3067 | 2.2173  | -1.0173 |
| CEU | TP53TG3 | 33700841 | 0.8592 | 1.7056  | -1.1592 |
| CEU | TP53TG3 | 33705841 | 1.5599 | 4.2641  | -1.7554 |
| CEU | TP53TG3 | 33710841 | 2.2181 | 7.1636  | -2.0244 |
| CEU | TP53TG3 | 33715841 | 2.6747 | 6.3108  | -1.6694 |
| CEU | TP53TG3 | 33720841 | 3.3723 | 7.1636  | -1.552  |
| CEU | TP53TG3 | 33725841 | 2.4376 | 7.6753  | -2.0132 |
| CEU | TP53TG3 | 33730841 | 3.3983 | 5.7991  | -1.1891 |
| CEU | TP53TG3 | 33735841 | 3.7403 | 7.3342  | -1.44   |
| CEU | TP53TG3 | 33740841 | 1.4731 | 6.9931  | -2.3097 |
| CEU | TP53TG3 | 33745841 | 0.7537 | 3.4112  | -2.0872 |
| CEU | TP53TG3 | 33750841 | 2.6825 | 4.4346  | -1.0993 |
| CEU | TP53TG3 | 33755841 | 2.8611 | 3.4112  | -0.4321 |
| CEU | TP53TG3 | 33760841 | 2.7403 | 2.729   | 0.0107  |
| CEU | TP53TG3 | 33765841 | 2.4395 | 4.4346  | -1.2518 |
| CEU | TP53TG3 | 33770841 | 1.7194 | 4.6052  | -1.7521 |
| CEU | TP53TG3 | 33775841 | 2.2962 | 4.0935  | -1.2086 |
| CEU | TP53TG3 | 33780841 | 2.7681 | 3.2407  | -0.3875 |
| CEU | TP53TG3 | 33785841 | 2.2583 | 3.9229  | -1.161  |
| CEU | TP53TG3 | 33790841 | 0.8827 | 5.2874  | -2.3684 |
| CEU | TP53TG3 | 33795841 | 2.0247 | 8.5281  | -2.2691 |
| CEU | TP53TG3 | 33800841 | 1.8425 | 7.8459  | -2.2616 |
| CEU | TP53TG3 | 33805841 | 0.5801 | 3.5818  | -2.2624 |
| CEU | TP53TG3 | 33810841 | 1.3185 | 2.8996  | -1.4219 |
| CEU | TP53TG3 | 33815841 | 2.5516 | 6.6519  | -1.7952 |
| CEU | TP53TG3 | 33820841 | 2.7675 | 10.916  | -2.26   |
| CEU | TP53TG3 | 33825841 | 1.6879 | 9.7221  | -2.4828 |
| CEU | TP53TG3 | 33830841 | 1.5467 | 6.9931  | -2.2789 |
| CEU | TP53TG3 | 33835841 | 3.0093 | 8.5281  | -1.9256 |
| CEU | TP53TG3 | 33840841 | 2.189  | 8.3576  | -2.1928 |
| CEU | TP53TG3 | 33845841 | 3.0064 | 7.8459  | -1.8231 |
| CEU | TP53TG3 | 33850841 | 3.4453 | 9.8926  | -1.9604 |
| CEU | TP53TG3 | 33855841 | 2.6739 | 11.9394 | -2.3623 |
| CHB | TP53TG3 | 32865841 | 0.7999 | 2.033   | -1.4705 |
| CHB | TP53TG3 | 32870841 | 1.379  | 2.3718  | -1.048  |
| CHB | TP53TG3 | 32875841 | 1.9692 | 5.5907  | -1.8478 |

## 2\_TajimasD\_data

|     |         |          |        |        |         |
|-----|---------|----------|--------|--------|---------|
| CHB | TP53TG3 | 32880841 | 1.4875 | 5.7601 | -2.1227 |
| CHB | TP53TG3 | 32885841 | 0.8119 | 3.5577 | -2.0751 |
| CHB | TP53TG3 | 32890841 | 1.5865 | 4.2354 | -1.7244 |
| CHB | TP53TG3 | 32895841 | 3.2058 | 4.066  | -0.5801 |
| CHB | TP53TG3 | 32900841 | 3.0823 | 4.4048 | -0.8322 |
| CHB | TP53TG3 | 32905841 | 2.1849 | 5.7601 | -1.7762 |
| CHB | TP53TG3 | 32910841 | 1.2321 | 6.0989 | -2.2973 |
| CHB | TP53TG3 | 32915841 | 1.5774 | 6.2684 | -2.1605 |
| CHB | TP53TG3 | 32920841 | 1.7455 | 5.9295 | -2.0255 |
| CHB | TP53TG3 | 32925841 | 1.3472 | 6.4378 | -2.2889 |
| CHB | TP53TG3 | 32930841 | 2.1542 | 7.7931 | -2.1312 |
| CHB | TP53TG3 | 32935841 | 1.4186 | 5.9295 | -2.1838 |
| CHB | TP53TG3 | 32940841 | 1.8374 | 6.7766 | -2.1202 |
| CHB | TP53TG3 | 32945841 | 2.1304 | 8.4708 | -2.2196 |
| CHB | TP53TG3 | 32950841 | 1.8938 | 6.7766 | -2.096  |
| CHB | TP53TG3 | 32955841 | 3.1744 | 7.6237 | -1.7158 |
| CHB | TP53TG3 | 32960841 | 1.719  | 4.5742 | -1.7386 |
| CHB | TP53TG3 | 32965841 | 0.578  | 0.8471 | -0.6068 |
| CHB | TP53TG3 | 32970841 | 2.0794 | 2.3718 | -0.3087 |
| CHB | TP53TG3 | 32975841 | 1.5403 | 2.033  | -0.5875 |
| CHB | TP53TG3 | 32980841 | 0.0388 | 0.6777 | -1.6703 |
| CHB | TP53TG3 | 32985841 | 0.5749 | 1.0165 | -0.8788 |
| CHB | TP53TG3 | 32990841 | 0.5652 | 0.8471 | -0.6357 |
| CHB | TP53TG3 | 32995841 | 0.1142 | 0.8471 | -1.6527 |
| CHB | TP53TG3 | 33000841 | 1.2033 | 3.5577 | -1.7793 |
| CHB | TP53TG3 | 33005841 | 1.2511 | 3.7271 | -1.7988 |
| CHB | TP53TG3 | 33010841 | 0.8439 | 2.8801 | -1.8359 |
| CHB | TP53TG3 | 33015841 | 1.1462 | 4.2354 | -2.0111 |
| CHB | TP53TG3 | 33020841 | 0.6059 | 3.2189 | -2.1482 |
| CHB | TP53TG3 | 33025841 | 1.5496 | 4.2354 | -1.7485 |
| CHB | TP53TG3 | 33030841 | 1.6419 | 4.2354 | -1.6884 |
| CHB | TP53TG3 | 33035841 | 0.9391 | 3.2189 | -1.8743 |
| CHB | TP53TG3 | 33040841 | 0.8283 | 2.8801 | -1.8499 |
| CHB | TP53TG3 | 33045841 | 0.1812 | 1.3553 | -1.9029 |
| CHB | TP53TG3 | 33050841 | 0.6457 | 2.7106 | -1.9566 |
| CHB | TP53TG3 | 33055841 | 1.1795 | 5.0825 | -2.1669 |
| CHB | TP53TG3 | 33060841 | 1.3113 | 4.066  | -1.8576 |
| CHB | TP53TG3 | 33065841 | 1.5406 | 2.5412 | -0.9992 |
| CHB | TP53TG3 | 33070841 | 2.1698 | 5.5907 | -1.7454 |
| CHB | TP53TG3 | 33075841 | 2.293  | 5.9295 | -1.7605 |
| CHB | TP53TG3 | 33080841 | 1.4049 | 2.8801 | -1.3301 |
| CHB | TP53TG3 | 33085841 | 0.4702 | 1.0165 | -1.0872 |
| CHB | TP53TG3 | 33090841 | 1.0651 | 0.6777 | 1.0128  |
| CHB | TP53TG3 | 33095841 | 1.0651 | 0.6777 | 1.0128  |
| CHB | TP53TG3 | 33100841 | 0      | 0      | 0       |
| CHB | TP53TG3 | 33105841 | 0.3415 | 0.6777 | -0.8789 |
| CHB | TP53TG3 | 33110841 | 0.3415 | 0.6777 | -0.8789 |
| CHB | TP53TG3 | 33115841 | 0      | 0      | 0       |
| CHB | TP53TG3 | 33120841 | 0.0194 | 0.3388 | -1.2812 |

## 2\_TajimasD\_data

|     |         |          |        |        |         |
|-----|---------|----------|--------|--------|---------|
| CHB | TP53TG3 | 33125841 | 0.0194 | 0.3388 | -1.2812 |
| CHB | TP53TG3 | 33130841 | 0      | 0      | 0       |
| CHB | TP53TG3 | 33135841 | 0      | 0      | 0       |
| CHB | TP53TG3 | 33140841 | 0.6421 | 0.5082 | 0.4203  |
| CHB | TP53TG3 | 33145841 | 0.6421 | 0.5082 | 0.4203  |
| CHB | TP53TG3 | 33150841 | 0      | 0      | 0       |
| CHB | TP53TG3 | 33155841 | 0      | 0      | 0       |
| CHB | TP53TG3 | 33160841 | 0      | 0      | 0       |
| CHB | TP53TG3 | 33165841 | 0      | 0      | 0       |
| CHB | TP53TG3 | 33170841 | 0.0388 | 0.5082 | -1.4735 |
| CHB | TP53TG3 | 33175841 | 0.0388 | 0.5082 | -1.4735 |
| CHB | TP53TG3 | 33180841 | 0      | 0      | 0       |
| CHB | TP53TG3 | 33185841 | 0      | 0      | 0       |
| CHB | TP53TG3 | 33190841 | 0      | 0      | 0       |
| CHB | TP53TG3 | 33195841 | 0      | 0      | 0       |
| CHB | TP53TG3 | 33200841 | 0.0192 | 0.1694 | -0.8925 |
| CHB | TP53TG3 | 33205841 | 0.4297 | 0.3388 | 0.3646  |
| CHB | TP53TG3 | 33210841 | 0.4104 | 0.1694 | 1.4321  |
| CHB | TP53TG3 | 33215841 | 0      | 0      | 0       |
| CHB | TP53TG3 | 33220841 | 0      | 0      | 0       |
| CHB | TP53TG3 | 33225841 | 0      | 0      | 0       |
| CHB | TP53TG3 | 33230841 | 0      | 0      | 0       |
| CHB | TP53TG3 | 33235841 | 0.0097 | 0.1694 | -0.949  |
| CHB | TP53TG3 | 33240841 | 0.6528 | 0.5082 | 0.4539  |
| CHB | TP53TG3 | 33245841 | 0.6528 | 0.5082 | 0.4539  |
| CHB | TP53TG3 | 33250841 | 0.0097 | 0.1694 | -0.949  |
| CHB | TP53TG3 | 33255841 | 0      | 0      | 0       |
| CHB | TP53TG3 | 33260841 | 0      | 0      | 0       |
| CHB | TP53TG3 | 33265841 | 0      | 0      | 0       |
| CHB | TP53TG3 | 33270841 | 0      | 0      | 0       |
| CHB | TP53TG3 | 33275841 | 0      | 0      | 0       |
| CHB | TP53TG3 | 33280841 | 0      | 0      | 0       |
| CHB | TP53TG3 | 33285841 | 0      | 0      | 0       |
| CHB | TP53TG3 | 33290841 | 1.1949 | 1.3553 | -0.26   |
| CHB | TP53TG3 | 33295841 | 1.8294 | 2.5412 | -0.7108 |
| CHB | TP53TG3 | 33300841 | 1.1114 | 1.5247 | -0.614  |
| CHB | TP53TG3 | 33305841 | 3.1156 | 2.3718 | 0.7851  |
| CHB | TP53TG3 | 33310841 | 5.3023 | 4.913  | 0.2227  |
| CHB | TP53TG3 | 33315841 | 5.2385 | 5.2519 | -0.0072 |
| CHB | TP53TG3 | 33320841 | 3.8473 | 4.7436 | -0.5287 |
| CHB | TP53TG3 | 33325841 | 1.6404 | 5.2519 | -1.9478 |
| CHB | TP53TG3 | 33330841 | 0.7877 | 4.2354 | -2.2445 |
| CHB | TP53TG3 | 33335841 | 0.5941 | 3.3883 | -2.2005 |
| CHB | TP53TG3 | 33340841 | 1.4561 | 4.7436 | -1.9392 |
| CHB | TP53TG3 | 33345841 | 2.1294 | 7.1154 | -2.0476 |
| CHB | TP53TG3 | 33350841 | 2.0383 | 8.1319 | -2.2149 |
| CHB | TP53TG3 | 33355841 | 2.1597 | 7.2848 | -2.0601 |
| CHB | TP53TG3 | 33360841 | 1.7072 | 5.5907 | -1.9814 |
| CHB | TP53TG3 | 33365841 | 1.8707 | 6.7766 | -2.1059 |

## 2\_TajimasD\_data

|     |         |          |         |         |         |
|-----|---------|----------|---------|---------|---------|
| CHB | TP53TG3 | 33370841 | 1.8073  | 7.9625  | -2.2809 |
| CHB | TP53TG3 | 33375841 | 2.3449  | 7.2848  | -1.9857 |
| CHB | TP53TG3 | 33380841 | 5.9338  | 7.7931  | -0.7027 |
| CHB | TP53TG3 | 33385841 | 6.2372  | 6.6072  | -0.1625 |
| CHB | TP53TG3 | 33390841 | 5.2842  | 6.0989  | -0.3846 |
| CHB | TP53TG3 | 33395841 | 5.1553  | 6.0989  | -0.4454 |
| CHB | TP53TG3 | 33400841 | 3.7106  | 5.9295  | -1.0742 |
| CHB | TP53TG3 | 33405841 | 4.819   | 5.7601  | -0.4676 |
| CHB | TP53TG3 | 33410841 | 12.5744 | 8.4708  | 1.4366  |
| CHB | TP53TG3 | 33415841 | 20.7646 | 12.1979 | 2.1343  |
| CHB | TP53TG3 | 33420841 | 20.7295 | 11.8591 | 2.2694  |
| CHB | TP53TG3 | 33425841 | 13.7263 | 9.6567  | 1.2619  |
| CHB | TP53TG3 | 33430841 | 9.0914  | 8.979   | 0.0373  |
| CHB | TP53TG3 | 33435841 | 11.0484 | 10.6731 | 0.106   |
| CHB | TP53TG3 | 33440841 | 9.3701  | 10.1649 | -0.235  |
| CHB | TP53TG3 | 33445841 | 9.5188  | 9.9955  | -0.1431 |
| CHB | TP53TG3 | 33450841 | 9.8975  | 10.6731 | -0.2191 |
| CHB | TP53TG3 | 33455841 | 4.927   | 7.9625  | -1.1249 |
| CHB | TP53TG3 | 33460841 | 7.0491  | 10.1649 | -0.9211 |
| CHB | TP53TG3 | 33465841 | 11.1988 | 13.3838 | -0.4987 |
| CHB | TP53TG3 | 33470841 | 11.3807 | 13.7226 | -0.522  |
| CHB | TP53TG3 | 33475841 | 11.1097 | 11.012  | 0.0268  |
| CHB | TP53TG3 | 33480841 | 15.3181 | 11.5202 | 0.9985  |
| CHB | TP53TG3 | 33485841 | 13.2043 | 12.1979 | 0.2507  |
| CHB | TP53TG3 | 33490841 | 7.3851  | 9.3178  | -0.6195 |
| CHB | TP53TG3 | 33495841 | 6.0651  | 7.2848  | -0.4903 |
| CHB | TP53TG3 | 33500841 | 4.2873  | 7.7931  | -1.325  |
| CHB | TP53TG3 | 33505841 | 8.4788  | 11.8591 | -0.8648 |
| CHB | TP53TG3 | 33510841 | 11.8079 | 11.8591 | -0.0131 |
| CHB | TP53TG3 | 33515841 | 8.6177  | 8.1319  | 0.1766  |
| CHB | TP53TG3 | 33520841 | 6.8513  | 5.9295  | 0.4463  |
| CHB | TP53TG3 | 33525841 | 7.2324  | 6.4378  | 0.3573  |
| CHB | TP53TG3 | 33530841 | 6.3775  | 6.4378  | -0.0271 |
| CHB | TP53TG3 | 33535841 | 8.0284  | 8.1319  | -0.0376 |
| CHB | TP53TG3 | 33540841 | 8.1784  | 8.4708  | -0.1024 |
| CHB | TP53TG3 | 33545841 | 6.3893  | 7.6237  | -0.476  |
| CHB | TP53TG3 | 33550841 | 6.0367  | 7.1154  | -0.443  |
| CHB | TP53TG3 | 33555841 | 6.7653  | 6.4378  | 0.1473  |
| CHB | TP53TG3 | 33560841 | 5.1609  | 5.0825  | 0.0435  |
| CHB | TP53TG3 | 33565841 | 6.3377  | 5.7601  | 0.287   |
| CHB | TP53TG3 | 33570841 | 11.0575 | 9.8261  | 0.3757  |
| CHB | TP53TG3 | 33575841 | 7.3811  | 7.2848  | 0.0387  |
| CHB | TP53TG3 | 33580841 | 1.8989  | 3.8965  | -1.3972 |
| CHB | TP53TG3 | 33585841 | 3.068   | 5.9295  | -1.3853 |
| CHB | TP53TG3 | 33590841 | 3.6257  | 5.9295  | -1.1153 |
| CHB | TP53TG3 | 33595841 | 2.898   | 6.4378  | -1.5916 |
| CHB | TP53TG3 | 33600841 | 2.4889  | 7.2848  | -1.9278 |
| CHB | TP53TG3 | 33605841 | 2.4533  | 5.9295  | -1.6829 |
| CHB | TP53TG3 | 33610841 | 3.0474  | 5.4213  | -1.2448 |

## 2\_TajimasD\_data

|     |         |          |        |        |         |
|-----|---------|----------|--------|--------|---------|
| CHB | TP53TG3 | 33615841 | 1.8827 | 5.5907 | -1.8919 |
| CHB | TP53TG3 | 33620841 | 1.2479 | 4.7436 | -2.062  |
| CHB | TP53TG3 | 33625841 | 2.0211 | 4.2354 | -1.4415 |
| CHB | TP53TG3 | 33630841 | 2.5481 | 3.3883 | -0.6617 |
| CHB | TP53TG3 | 33635841 | 1.8079 | 1.5247 | 0.4207  |
| CHB | TP53TG3 | 33640841 | 1.9591 | 1.8636 | 0.1218  |
| CHB | TP53TG3 | 33645841 | 1.9937 | 2.5412 | -0.5467 |
| CHB | TP53TG3 | 33650841 | 0.637  | 2.3718 | -1.8312 |
| CHB | TP53TG3 | 33655841 | 1.08   | 2.7106 | -1.5451 |
| CHB | TP53TG3 | 33660841 | 2.1167 | 4.913  | -1.5995 |
| CHB | TP53TG3 | 33665841 | 1.2302 | 4.2354 | -1.9564 |
| CHB | TP53TG3 | 33670841 | 0.1157 | 0.8471 | -1.6493 |
| CHB | TP53TG3 | 33675841 | 0      | 0      | 0       |
| CHB | TP53TG3 | 33680841 | 0.0386 | 0.3388 | -1.2042 |
| CHB | TP53TG3 | 33685841 | 0.3617 | 1.1859 | -1.4712 |
| CHB | TP53TG3 | 33690841 | 0.9282 | 2.033  | -1.3175 |
| CHB | TP53TG3 | 33695841 | 0.854  | 1.8636 | -1.2881 |
| CHB | TP53TG3 | 33700841 | 0.6002 | 1.6942 | -1.5014 |
| CHB | TP53TG3 | 33705841 | 1.8825 | 3.3883 | -1.1859 |
| CHB | TP53TG3 | 33710841 | 2.3356 | 5.0825 | -1.525  |
| CHB | TP53TG3 | 33715841 | 2.5561 | 6.4378 | -1.7453 |
| CHB | TP53TG3 | 33720841 | 2.9674 | 6.946  | -1.6701 |
| CHB | TP53TG3 | 33725841 | 1.6227 | 4.7436 | -1.8409 |
| CHB | TP53TG3 | 33730841 | 2.5972 | 4.5742 | -1.2038 |
| CHB | TP53TG3 | 33735841 | 3.2753 | 6.946  | -1.5408 |
| CHB | TP53TG3 | 33740841 | 1.3164 | 4.7436 | -2.0216 |
| CHB | TP53TG3 | 33745841 | 0.5157 | 2.7106 | -2.0798 |
| CHB | TP53TG3 | 33750841 | 2.0577 | 4.066  | -1.3543 |
| CHB | TP53TG3 | 33755841 | 2.0383 | 2.3718 | -0.352  |
| CHB | TP53TG3 | 33760841 | 2.4483 | 2.033  | 0.4952  |
| CHB | TP53TG3 | 33765841 | 2.4681 | 3.5577 | -0.8235 |
| CHB | TP53TG3 | 33770841 | 2.2145 | 4.7436 | -1.4919 |
| CHB | TP53TG3 | 33775841 | 2.6215 | 4.066  | -0.9741 |
| CHB | TP53TG3 | 33780841 | 2.3524 | 3.3883 | -0.8158 |
| CHB | TP53TG3 | 33785841 | 1.7573 | 3.5577 | -1.3607 |
| CHB | TP53TG3 | 33790841 | 1.2416 | 5.2519 | -2.1629 |
| CHB | TP53TG3 | 33795841 | 1.8725 | 6.7766 | -2.1052 |
| CHB | TP53TG3 | 33800841 | 1.81   | 4.2354 | -1.5789 |
| CHB | TP53TG3 | 33805841 | 1.1687 | 1.8636 | -0.8866 |
| CHB | TP53TG3 | 33810841 | 1.0992 | 1.3553 | -0.4151 |
| CHB | TP53TG3 | 33815841 | 1.9859 | 5.2519 | -1.7615 |
| CHB | TP53TG3 | 33820841 | 2.0948 | 9.9955 | -2.3724 |
| CHB | TP53TG3 | 33825841 | 1.2671 | 7.6237 | -2.4513 |
| CHB | TP53TG3 | 33830841 | 0.9654 | 4.913  | -2.258  |
| CHB | TP53TG3 | 33835841 | 2.2098 | 6.0989 | -1.8358 |
| CHB | TP53TG3 | 33840841 | 1.6221 | 6.6072 | -2.1895 |
| CHB | TP53TG3 | 33845841 | 2.2696 | 8.1319 | -2.1308 |
| CHB | TP53TG3 | 33850841 | 3.2058 | 7.6237 | -1.7037 |
| CHB | TP53TG3 | 33855841 | 2.2064 | 6.7766 | -1.9618 |



## 2\_TajimasD\_data

|     |         |          |        |         |         |
|-----|---------|----------|--------|---------|---------|
| YRI | TP53TG3 | 32865841 | 1.7206 | 2.689   | -0.9203 |
| YRI | TP53TG3 | 32870841 | 2.8508 | 3.0251  | -0.1504 |
| YRI | TP53TG3 | 32875841 | 3.4506 | 6.7225  | -1.4099 |
| YRI | TP53TG3 | 32880841 | 1.7857 | 6.5544  | -2.1024 |
| YRI | TP53TG3 | 32885841 | 1.7837 | 5.2099  | -1.8545 |
| YRI | TP53TG3 | 32890841 | 2.9853 | 6.5544  | -1.5735 |
| YRI | TP53TG3 | 32895841 | 3.5678 | 5.8822  | -1.1246 |
| YRI | TP53TG3 | 32900841 | 3.1916 | 5.8822  | -1.3074 |
| YRI | TP53TG3 | 32905841 | 3.3482 | 7.7309  | -1.6629 |
| YRI | TP53TG3 | 32910841 | 3.2784 | 8.9073  | -1.8747 |
| YRI | TP53TG3 | 32915841 | 3.0299 | 8.067   | -1.8381 |
| YRI | TP53TG3 | 32920841 | 3.3088 | 8.4031  | -1.7904 |
| YRI | TP53TG3 | 32925841 | 3.2232 | 10.924  | -2.1209 |
| YRI | TP53TG3 | 32930841 | 3.7945 | 11.7644 | -2.0475 |
| YRI | TP53TG3 | 32935841 | 3.3503 | 9.4115  | -1.9183 |
| YRI | TP53TG3 | 32940841 | 3.451  | 8.7392  | -1.7926 |
| YRI | TP53TG3 | 32945841 | 3.5234 | 10.2518 | -1.9665 |
| YRI | TP53TG3 | 32950841 | 4.118  | 10.756  | -1.855  |
| YRI | TP53TG3 | 32955841 | 6.2593 | 11.4282 | -1.3646 |
| YRI | TP53TG3 | 32960841 | 3.9029 | 6.2183  | -1.0704 |
| YRI | TP53TG3 | 32965841 | 1.149  | 2.0167  | -1.0375 |
| YRI | TP53TG3 | 32970841 | 2.1543 | 4.7057  | -1.5103 |
| YRI | TP53TG3 | 32975841 | 2.2855 | 5.5461  | -1.6697 |
| YRI | TP53TG3 | 32980841 | 1.0328 | 2.689   | -1.574  |
| YRI | TP53TG3 | 32985841 | 0.6619 | 1.0084  | -0.6908 |
| YRI | TP53TG3 | 32990841 | 0.4611 | 1.0084  | -1.0911 |
| YRI | TP53TG3 | 32995841 | 0.447  | 1.1764  | -1.3046 |
| YRI | TP53TG3 | 33000841 | 1.6787 | 6.3864  | -2.1247 |
| YRI | TP53TG3 | 33005841 | 1.6465 | 7.3947  | -2.2714 |
| YRI | TP53TG3 | 33010841 | 0.5716 | 3.6974  | -2.2783 |
| YRI | TP53TG3 | 33015841 | 1.0547 | 4.8738  | -2.1923 |
| YRI | TP53TG3 | 33020841 | 1.3228 | 5.8822  | -2.2155 |
| YRI | TP53TG3 | 33025841 | 1.9009 | 5.378   | -1.8299 |
| YRI | TP53TG3 | 33030841 | 1.6859 | 3.8654  | -1.5295 |
| YRI | TP53TG3 | 33035841 | 1.9845 | 7.2267  | -2.1153 |
| YRI | TP53TG3 | 33040841 | 1.7632 | 6.5544  | -2.1123 |
| YRI | TP53TG3 | 33045841 | 0.8062 | 1.8487  | -1.3335 |
| YRI | TP53TG3 | 33050841 | 1.9233 | 5.5461  | -1.8552 |
| YRI | TP53TG3 | 33055841 | 2.1209 | 8.9073  | -2.2603 |
| YRI | TP53TG3 | 33060841 | 1.9483 | 6.7225  | -2.0572 |
| YRI | TP53TG3 | 33065841 | 2.985  | 5.7141  | -1.3609 |
| YRI | TP53TG3 | 33070841 | 3.7979 | 8.4031  | -1.6185 |
| YRI | TP53TG3 | 33075841 | 2.3686 | 7.0586  | -1.9335 |
| YRI | TP53TG3 | 33080841 | 0.8392 | 3.6974  | -2.0833 |
| YRI | TP53TG3 | 33085841 | 0.3605 | 1.6806  | -1.8161 |
| YRI | TP53TG3 | 33090841 | 0.1195 | 1.0084  | -1.7722 |
| YRI | TP53TG3 | 33095841 | 0.1195 | 1.0084  | -1.7722 |
| YRI | TP53TG3 | 33100841 | 0.0276 | 0.1681  | -0.8352 |
| YRI | TP53TG3 | 33105841 | 0.4968 | 0.5042  | -0.0233 |

## 2\_TajimasD\_data

|     |         |          |        |         |         |
|-----|---------|----------|--------|---------|---------|
| YRI | TP53TG3 | 33110841 | 0.4692 | 0.3361  | 0.5343  |
| YRI | TP53TG3 | 33115841 | 0.0369 | 0.5042  | -1.4686 |
| YRI | TP53TG3 | 33120841 | 0.0369 | 0.5042  | -1.4686 |
| YRI | TP53TG3 | 33125841 | 0      | 0       | 0       |
| YRI | TP53TG3 | 33130841 | 0      | 0       | 0       |
| YRI | TP53TG3 | 33135841 | 0      | 0       | 0       |
| YRI | TP53TG3 | 33140841 | 1.0444 | 1.3445  | -0.4874 |
| YRI | TP53TG3 | 33145841 | 1.0444 | 1.3445  | -0.4874 |
| YRI | TP53TG3 | 33150841 | 0      | 0       | 0       |
| YRI | TP53TG3 | 33155841 | 0      | 0       | 0       |
| YRI | TP53TG3 | 33160841 | 0      | 0       | 0       |
| YRI | TP53TG3 | 33165841 | 0      | 0       | 0       |
| YRI | TP53TG3 | 33170841 | 0.046  | 0.3361  | -1.1646 |
| YRI | TP53TG3 | 33175841 | 0.046  | 0.3361  | -1.1646 |
| YRI | TP53TG3 | 33180841 | 0      | 0       | 0       |
| YRI | TP53TG3 | 33185841 | 0      | 0       | 0       |
| YRI | TP53TG3 | 33190841 | 0      | 0       | 0       |
| YRI | TP53TG3 | 33195841 | 0      | 0       | 0       |
| YRI | TP53TG3 | 33200841 | 0.0276 | 0.1681  | -0.8352 |
| YRI | TP53TG3 | 33205841 | 0.0814 | 0.3361  | -1.0225 |
| YRI | TP53TG3 | 33210841 | 0.0538 | 0.1681  | -0.6795 |
| YRI | TP53TG3 | 33215841 | 0      | 0       | 0       |
| YRI | TP53TG3 | 33220841 | 0      | 0       | 0       |
| YRI | TP53TG3 | 33225841 | 0      | 0       | 0       |
| YRI | TP53TG3 | 33230841 | 0      | 0       | 0       |
| YRI | TP53TG3 | 33235841 | 0      | 0       | 0       |
| YRI | TP53TG3 | 33240841 | 1.0125 | 0.6722  | 0.8909  |
| YRI | TP53TG3 | 33245841 | 1.0125 | 0.6722  | 0.8909  |
| YRI | TP53TG3 | 33250841 | 0      | 0       | 0       |
| YRI | TP53TG3 | 33255841 | 0      | 0       | 0       |
| YRI | TP53TG3 | 33260841 | 0      | 0       | 0       |
| YRI | TP53TG3 | 33265841 | 0      | 0       | 0       |
| YRI | TP53TG3 | 33270841 | 0      | 0       | 0       |
| YRI | TP53TG3 | 33275841 | 0      | 0       | 0       |
| YRI | TP53TG3 | 33280841 | 0      | 0       | 0       |
| YRI | TP53TG3 | 33285841 | 0      | 0       | 0       |
| YRI | TP53TG3 | 33290841 | 1.2831 | 3.0251  | -1.5028 |
| YRI | TP53TG3 | 33295841 | 2.111  | 5.378   | -1.7193 |
| YRI | TP53TG3 | 33300841 | 1.4804 | 3.6974  | -1.6159 |
| YRI | TP53TG3 | 33305841 | 3.7143 | 4.0335  | -0.216  |
| YRI | TP53TG3 | 33310841 | 5.8757 | 6.5544  | -0.2992 |
| YRI | TP53TG3 | 33315841 | 5.3792 | 7.8989  | -0.9374 |
| YRI | TP53TG3 | 33320841 | 4.2555 | 7.2267  | -1.1989 |
| YRI | TP53TG3 | 33325841 | 2.8977 | 7.0586  | -1.7153 |
| YRI | TP53TG3 | 33330841 | 2.1735 | 5.378   | -1.6865 |
| YRI | TP53TG3 | 33335841 | 2.2554 | 5.7141  | -1.7247 |
| YRI | TP53TG3 | 33340841 | 2.8504 | 8.235   | -1.928  |
| YRI | TP53TG3 | 33345841 | 2.679  | 9.9157  | -2.1819 |
| YRI | TP53TG3 | 33350841 | 2.7569 | 12.2685 | -2.3489 |

## 2\_TajimasD\_data

|     |         |          |         |         |         |
|-----|---------|----------|---------|---------|---------|
| YRI | TP53TG3 | 33355841 | 3.6648  | 11.5963 | -2.0654 |
| YRI | TP53TG3 | 33360841 | 3.5171  | 11.5963 | -2.1039 |
| YRI | TP53TG3 | 33365841 | 3.7737  | 12.7727 | -2.1394 |
| YRI | TP53TG3 | 33370841 | 5.0106  | 13.445  | -1.9101 |
| YRI | TP53TG3 | 33375841 | 8.2376  | 19.8313 | -1.8109 |
| YRI | TP53TG3 | 33380841 | 9.9503  | 18.1507 | -1.3948 |
| YRI | TP53TG3 | 33385841 | 6.5138  | 8.235   | -0.6163 |
| YRI | TP53TG3 | 33390841 | 5.8635  | 8.067   | -0.8041 |
| YRI | TP53TG3 | 33395841 | 6.8319  | 9.9157  | -0.9298 |
| YRI | TP53TG3 | 33400841 | 5.4444  | 8.7392  | -1.1168 |
| YRI | TP53TG3 | 33405841 | 5.393   | 7.5628  | -0.84   |
| YRI | TP53TG3 | 33410841 | 14.1401 | 11.0921 | 0.8275  |
| YRI | TP53TG3 | 33415841 | 23.6878 | 16.134  | 1.4382  |
| YRI | TP53TG3 | 33420841 | 22.4704 | 14.9575 | 1.5376  |
| YRI | TP53TG3 | 33425841 | 15.4658 | 12.2685 | 0.7896  |
| YRI | TP53TG3 | 33430841 | 12.3596 | 15.4617 | -0.6151 |
| YRI | TP53TG3 | 33435841 | 14.645  | 18.823  | -0.6862 |
| YRI | TP53TG3 | 33440841 | 13.0186 | 15.1256 | -0.4266 |
| YRI | TP53TG3 | 33445841 | 13.4141 | 13.1089 | 0.0708  |
| YRI | TP53TG3 | 33450841 | 12.593  | 12.6047 | -0.0028 |
| YRI | TP53TG3 | 33455841 | 6.7452  | 10.2518 | -1.0249 |
| YRI | TP53TG3 | 33460841 | 11.4657 | 12.6047 | -0.2742 |
| YRI | TP53TG3 | 33465841 | 17.131  | 17.1423 | -0.002  |
| YRI | TP53TG3 | 33470841 | 17.8672 | 17.9827 | -0.0198 |
| YRI | TP53TG3 | 33475841 | 14.6216 | 15.1256 | -0.1021 |
| YRI | TP53TG3 | 33480841 | 18.54   | 16.6382 | 0.3516  |
| YRI | TP53TG3 | 33485841 | 19.3096 | 16.302  | 0.567   |
| YRI | TP53TG3 | 33490841 | 10.7    | 12.9408 | -0.5262 |
| YRI | TP53TG3 | 33495841 | 7.466   | 10.5879 | -0.8854 |
| YRI | TP53TG3 | 33500841 | 6.715   | 10.924  | -1.1592 |
| YRI | TP53TG3 | 33505841 | 13.5327 | 14.6214 | -0.2277 |
| YRI | TP53TG3 | 33510841 | 17.8255 | 13.445  | 0.9921  |
| YRI | TP53TG3 | 33515841 | 12.5904 | 11.7644 | 0.2122  |
| YRI | TP53TG3 | 33520841 | 8.9052  | 11.7644 | -0.7345 |
| YRI | TP53TG3 | 33525841 | 8.8073  | 10.4199 | -0.4642 |
| YRI | TP53TG3 | 33530841 | 8.0115  | 10.2518 | -0.6548 |
| YRI | TP53TG3 | 33535841 | 11.0246 | 11.7644 | -0.1901 |
| YRI | TP53TG3 | 33540841 | 11.9677 | 11.7644 | 0.0522  |
| YRI | TP53TG3 | 33545841 | 9.5172  | 10.756  | -0.3462 |
| YRI | TP53TG3 | 33550841 | 8.202   | 9.5795  | -0.4289 |
| YRI | TP53TG3 | 33555841 | 9.7962  | 10.0837 | -0.0853 |
| YRI | TP53TG3 | 33560841 | 8.4154  | 9.2434  | -0.2665 |
| YRI | TP53TG3 | 33565841 | 8.2703  | 9.9157  | -0.4961 |
| YRI | TP53TG3 | 33570841 | 14.2745 | 15.9659 | -0.3253 |
| YRI | TP53TG3 | 33575841 | 10.9608 | 13.1089 | -0.4983 |
| YRI | TP53TG3 | 33580841 | 6.8909  | 9.7476  | -0.8751 |
| YRI | TP53TG3 | 33585841 | 10.7201 | 13.9492 | -0.7062 |
| YRI | TP53TG3 | 33590841 | 14.9232 | 15.9659 | -0.2005 |
| YRI | TP53TG3 | 33595841 | 18.0441 | 16.8062 | 0.2267  |

## 2\_TajimasD\_data

|     |         |          |         |         |         |
|-----|---------|----------|---------|---------|---------|
| YRI | TP53TG3 | 33600841 | 19.0457 | 17.4785 | 0.2764  |
| YRI | TP53TG3 | 33605841 | 20.1962 | 19.4952 | 0.1113  |
| YRI | TP53TG3 | 33610841 | 21.2619 | 21.0078 | 0.0375  |
| YRI | TP53TG3 | 33615841 | 19.5227 | 20.1675 | -0.0991 |
| YRI | TP53TG3 | 33620841 | 15.5981 | 16.4701 | -0.1628 |
| YRI | TP53TG3 | 33625841 | 8.5248  | 10.924  | -0.6608 |
| YRI | TP53TG3 | 33630841 | 4.4753  | 8.067   | -1.3106 |
| YRI | TP53TG3 | 33635841 | 3.4354  | 5.8822  | -1.1889 |
| YRI | TP53TG3 | 33640841 | 2.8517  | 5.2099  | -1.2764 |
| YRI | TP53TG3 | 33645841 | 5.0421  | 7.3947  | -0.9296 |
| YRI | TP53TG3 | 33650841 | 5.0226  | 8.067   | -1.1109 |
| YRI | TP53TG3 | 33655841 | 3.7866  | 6.0502  | -1.0725 |
| YRI | TP53TG3 | 33660841 | 4.9479  | 7.3947  | -0.9669 |
| YRI | TP53TG3 | 33665841 | 3.5839  | 6.3864  | -1.2649 |
| YRI | TP53TG3 | 33670841 | 0.538   | 2.0167  | -1.768  |
| YRI | TP53TG3 | 33675841 | 0.1861  | 0.8403  | -1.4776 |
| YRI | TP53TG3 | 33680841 | 0.0276  | 0.1681  | -0.8352 |
| YRI | TP53TG3 | 33685841 | 1.3118  | 1.1764  | 0.2422  |
| YRI | TP53TG3 | 33690841 | 3.0491  | 2.689   | 0.3422  |
| YRI | TP53TG3 | 33695841 | 2.6361  | 3.3612  | -0.5729 |
| YRI | TP53TG3 | 33700841 | 1.1685  | 2.3529  | -1.2537 |
| YRI | TP53TG3 | 33705841 | 1.6928  | 6.0502  | -2.0646 |
| YRI | TP53TG3 | 33710841 | 2.7377  | 10.4199 | -2.2115 |
| YRI | TP53TG3 | 33715841 | 3.9863  | 9.5795  | -1.7413 |
| YRI | TP53TG3 | 33720841 | 5.5163  | 9.2434  | -1.1995 |
| YRI | TP53TG3 | 33725841 | 4.2769  | 8.235   | -1.4172 |
| YRI | TP53TG3 | 33730841 | 4.2611  | 6.2183  | -0.9048 |
| YRI | TP53TG3 | 33735841 | 5.9859  | 9.2434  | -1.0484 |
| YRI | TP53TG3 | 33740841 | 3.501   | 9.4115  | -1.8706 |
| YRI | TP53TG3 | 33745841 | 0.8967  | 5.2099  | -2.3346 |
| YRI | TP53TG3 | 33750841 | 2.4255  | 5.8822  | -1.6796 |
| YRI | TP53TG3 | 33755841 | 1.9545  | 3.6974  | -1.2704 |
| YRI | TP53TG3 | 33760841 | 2.7789  | 3.8654  | -0.7625 |
| YRI | TP53TG3 | 33765841 | 3.9039  | 5.5461  | -0.841  |
| YRI | TP53TG3 | 33770841 | 3.8519  | 6.2183  | -1.094  |
| YRI | TP53TG3 | 33775841 | 3.6331  | 5.8822  | -1.0929 |
| YRI | TP53TG3 | 33780841 | 3.5093  | 5.2099  | -0.9205 |
| YRI | TP53TG3 | 33785841 | 3.8638  | 6.3864  | -1.1385 |
| YRI | TP53TG3 | 33790841 | 4.5292  | 8.7392  | -1.4271 |
| YRI | TP53TG3 | 33795841 | 9.9822  | 13.9492 | -0.8676 |
| YRI | TP53TG3 | 33800841 | 9.1399  | 11.2602 | -0.5676 |
| YRI | TP53TG3 | 33805841 | 3.6457  | 4.7057  | -0.6275 |
| YRI | TP53TG3 | 33810841 | 3.456   | 3.8654  | -0.2873 |
| YRI | TP53TG3 | 33815841 | 6.6453  | 9.7476  | -0.9504 |
| YRI | TP53TG3 | 33820841 | 9.5359  | 16.134  | -1.2563 |
| YRI | TP53TG3 | 33825841 | 8.308   | 13.613  | -1.1874 |
| YRI | TP53TG3 | 33830841 | 4.7412  | 7.8989  | -1.1747 |
| YRI | TP53TG3 | 33835841 | 6.3869  | 8.9073  | -0.8394 |
| YRI | TP53TG3 | 33840841 | 7.7101  | 11.0921 | -0.9182 |

## 2\_TajimasD\_data

|     |         |          |        |         |         |
|-----|---------|----------|--------|---------|---------|
| YRI | TP53TG3 | 33845841 | 5.8924 | 12.6047 | -1.6158 |
| YRI | TP53TG3 | 33850841 | 6.3733 | 13.613  | -1.6204 |
| YRI | TP53TG3 | 33855841 | 8.6603 | 15.7978 | -1.3866 |
| CEU | TP53TG3 | 32962156 | 1.2622 | 5.7991  | -2.2471 |
| CEU | TP53TG3 | 32967156 | 1.3519 | 2.5584  | -1.2019 |
| CEU | TP53TG3 | 32972156 | 2.2818 | 3.4112  | -0.8871 |
| CEU | TP53TG3 | 32977156 | 1.3067 | 2.8996  | -1.4325 |
| CEU | TP53TG3 | 32982156 | 0.7017 | 1.5351  | -1.2358 |
| CEU | TP53TG3 | 32987156 | 0.6496 | 1.0234  | -0.7428 |
| CEU | TP53TG3 | 32992156 | 0.1476 | 0.8528  | -1.5881 |
| CEU | TP53TG3 | 32997156 | 0.524  | 2.2173  | -1.8917 |
| CEU | TP53TG3 | 33002156 | 1.2247 | 3.5818  | -1.7765 |
| CEU | TP53TG3 | 33007156 | 0.8009 | 2.2173  | -1.5824 |
| CEU | TP53TG3 | 33012156 | 0.2461 | 1.5351  | -1.9113 |
| CEU | TP53TG3 | 33017156 | 0.4644 | 3.2407  | -2.2765 |
| CEU | TP53TG3 | 33022156 | 1.0126 | 3.7524  | -1.9849 |
| CEU | TP53TG3 | 33027156 | 1.3034 | 2.729   | -1.3475 |
| CEU | TP53TG3 | 33032156 | 0.7528 | 1.7056  | -1.305  |
| CEU | TP53TG3 | 33037156 | 1.3972 | 3.5818  | -1.6465 |
| CEU | TP53TG3 | 33042156 | 1.4976 | 3.5818  | -1.5709 |
| CEU | TP53TG3 | 33047156 | 0.5669 | 1.1939  | -1.1173 |
| CEU | TP53TG3 | 33052156 | 0.6753 | 2.5584  | -1.8759 |
| CEU | TP53TG3 | 33057156 | 0.6877 | 3.9229  | -2.2565 |
| CEU | TP53TG3 | 33062156 | 1.0167 | 4.2641  | -2.108  |
| CEU | TP53TG3 | 33067156 | 2.5892 | 5.7991  | -1.5898 |
| CEU | TP53TG3 | 33072156 | 2.9794 | 6.1402  | -1.4874 |
| CEU | TP53TG3 | 33077156 | 1.1517 | 3.0701  | -1.6456 |
| CEU | TP53TG3 | 33082156 | 0.2579 | 1.0234  | -1.5211 |
| CEU | TP53TG3 | 33087156 | 0.2781 | 1.1939  | -1.632  |
| CEU | TP53TG3 | 33092156 | 0.8306 | 0.8528  | -0.05   |
| CEU | TP53TG3 | 33097156 | 0.8002 | 0.5117  | 0.9048  |
| CEU | TP53TG3 | 33102156 | 0.2983 | 0.1706  | 0.7586  |
| CEU | TP53TG3 | 33107156 | 0.4482 | 0.3411  | 0.4293  |
| CEU | TP53TG3 | 33112156 | 0.2002 | 0.6822  | -1.2586 |
| CEU | TP53TG3 | 33117156 | 0.1189 | 0.8528  | -1.6527 |
| CEU | TP53TG3 | 33122156 | 0.0888 | 0.6822  | -1.5495 |
| CEU | TP53TG3 | 33127156 | 0.0202 | 0.3411  | -1.2864 |
| CEU | TP53TG3 | 33132156 | 0      | 0       | 0       |
| CEU | TP53TG3 | 33137156 | 0      | 0       | 0       |
| CEU | TP53TG3 | 33142156 | 0.7326 | 0.5117  | 0.6928  |
| CEU | TP53TG3 | 33147156 | 0.7326 | 0.5117  | 0.6928  |
| CEU | TP53TG3 | 33152156 | 0      | 0       | 0       |
| CEU | TP53TG3 | 33157156 | 0      | 0       | 0       |
| CEU | TP53TG3 | 33162156 | 0      | 0       | 0       |
| CEU | TP53TG3 | 33167156 | 0      | 0       | 0       |
| CEU | TP53TG3 | 33172156 | 0.059  | 0.1706  | -0.6629 |
| CEU | TP53TG3 | 33177156 | 0.059  | 0.1706  | -0.6629 |
| CEU | TP53TG3 | 33182156 | 0      | 0       | 0       |
| CEU | TP53TG3 | 33187156 | 0      | 0       | 0       |

## 2\_TajimasD\_data

|     |         |          |         |         |         |
|-----|---------|----------|---------|---------|---------|
| CEU | TP53TG3 | 33192156 | 0       | 0       | 0       |
| CEU | TP53TG3 | 33197156 | 0.0202  | 0.1706  | -0.8934 |
| CEU | TP53TG3 | 33202156 | 0.0202  | 0.1706  | -0.8934 |
| CEU | TP53TG3 | 33207156 | 0       | 0       | 0       |
| CEU | TP53TG3 | 33212156 | 0       | 0       | 0       |
| CEU | TP53TG3 | 33217156 | 0       | 0       | 0       |
| CEU | TP53TG3 | 33222156 | 0       | 0       | 0       |
| CEU | TP53TG3 | 33227156 | 0       | 0       | 0       |
| CEU | TP53TG3 | 33232156 | 0       | 0       | 0       |
| CEU | TP53TG3 | 33237156 | 1.0136  | 0.5117  | 1.5741  |
| CEU | TP53TG3 | 33242156 | 1.0237  | 0.6822  | 0.8918  |
| CEU | TP53TG3 | 33247156 | 0.0101  | 0.1706  | -0.9534 |
| CEU | TP53TG3 | 33252156 | 0       | 0       | 0       |
| CEU | TP53TG3 | 33257156 | 0       | 0       | 0       |
| CEU | TP53TG3 | 33262156 | 0       | 0       | 0       |
| CEU | TP53TG3 | 33267156 | 0       | 0       | 0       |
| CEU | TP53TG3 | 33272156 | 0       | 0       | 0       |
| CEU | TP53TG3 | 33277156 | 0       | 0       | 0       |
| CEU | TP53TG3 | 33282156 | 0       | 0       | 0       |
| CEU | TP53TG3 | 33287156 | 0       | 0       | 0       |
| CEU | TP53TG3 | 33292156 | 1.8965  | 2.0467  | -0.1787 |
| CEU | TP53TG3 | 33297156 | 1.947   | 2.729   | -0.7392 |
| CEU | TP53TG3 | 33302156 | 1.6042  | 2.0467  | -0.5265 |
| CEU | TP53TG3 | 33307156 | 3.7724  | 3.4112  | 0.2837  |
| CEU | TP53TG3 | 33312156 | 4.9647  | 5.2874  | -0.1735 |
| CEU | TP53TG3 | 33317156 | 4.6145  | 5.2874  | -0.3618 |
| CEU | TP53TG3 | 33322156 | 3.9786  | 4.2641  | -0.1853 |
| CEU | TP53TG3 | 33327156 | 2.9713  | 3.7524  | -0.5659 |
| CEU | TP53TG3 | 33332156 | 1.1379  | 3.2407  | -1.7242 |
| CEU | TP53TG3 | 33337156 | 1.0445  | 4.2641  | -2.09   |
| CEU | TP53TG3 | 33342156 | 1.5149  | 4.6052  | -1.8763 |
| CEU | TP53TG3 | 33347156 | 2.1814  | 6.1402  | -1.8629 |
| CEU | TP53TG3 | 33352156 | 2.3251  | 6.9931  | -1.9532 |
| CEU | TP53TG3 | 33357156 | 2.1828  | 6.1402  | -1.8622 |
| CEU | TP53TG3 | 33362156 | 2.1251  | 6.6519  | -1.9819 |
| CEU | TP53TG3 | 33367156 | 2.0076  | 6.8225  | -2.0603 |
| CEU | TP53TG3 | 33372156 | 1.9138  | 10.7454 | -2.4858 |
| CEU | TP53TG3 | 33377156 | 2.7879  | 14.4978 | -2.4843 |
| CEU | TP53TG3 | 33382156 | 6.2492  | 10.4043 | -1.2054 |
| CEU | TP53TG3 | 33387156 | 6.5426  | 5.7991  | 0.3683  |
| CEU | TP53TG3 | 33392156 | 6.0069  | 6.8225  | -0.349  |
| CEU | TP53TG3 | 33397156 | 5.6993  | 7.8459  | -0.8087 |
| CEU | TP53TG3 | 33402156 | 4.5176  | 6.4814  | -0.8802 |
| CEU | TP53TG3 | 33407156 | 3.9683  | 6.3108  | -1.0755 |
| CEU | TP53TG3 | 33412156 | 14.3302 | 11.0866 | 0.8866  |
| CEU | TP53TG3 | 33417156 | 24.5898 | 13.1333 | 2.6695  |
| CEU | TP53TG3 | 33422156 | 20.5786 | 10.7454 | 2.7678  |
| CEU | TP53TG3 | 33427156 | 13.0398 | 9.7221  | 1.0253  |
| CEU | TP53TG3 | 33432156 | 10.8281 | 10.0632 | 0.2289  |

## 2\_TajimasD\_data

|     |         |          |         |         |         |
|-----|---------|----------|---------|---------|---------|
| CEU | TP53TG3 | 33437156 | 9.9786  | 9.2104  | 0.2496  |
| CEU | TP53TG3 | 33442156 | 8.8389  | 8.187   | 0.2362  |
| CEU | TP53TG3 | 33447156 | 11.7612 | 11.2571 | 0.1358  |
| CEU | TP53TG3 | 33452156 | 8.2659  | 10.7454 | -0.6979 |
| CEU | TP53TG3 | 33457156 | 3.7001  | 8.187   | -1.6255 |
| CEU | TP53TG3 | 33462156 | 8.9489  | 10.5749 | -0.4646 |
| CEU | TP53TG3 | 33467156 | 13.2722 | 12.4511 | 0.2012  |
| CEU | TP53TG3 | 33472156 | 12.3059 | 12.7922 | -0.1162 |
| CEU | TP53TG3 | 33477156 | 16.1477 | 13.4744 | 0.608   |
| CEU | TP53TG3 | 33482156 | 17.4868 | 13.3039 | 0.9628  |
| CEU | TP53TG3 | 33487156 | 11.5761 | 10.2337 | 0.3955  |
| CEU | TP53TG3 | 33492156 | 7.0709  | 8.3576  | -0.4574 |
| CEU | TP53TG3 | 33497156 | 5.1402  | 7.8459  | -1.0193 |
| CEU | TP53TG3 | 33502156 | 5.5318  | 7.6753  | -0.8239 |
| CEU | TP53TG3 | 33507156 | 12.068  | 10.7454 | 0.3723  |
| CEU | TP53TG3 | 33512156 | 11.7341 | 10.916  | 0.2269  |
| CEU | TP53TG3 | 33517156 | 7.2016  | 10.4043 | -0.9291 |
| CEU | TP53TG3 | 33522156 | 8.4349  | 9.5515  | -0.3508 |
| CEU | TP53TG3 | 33527156 | 8.736   | 8.187   | 0.1989  |
| CEU | TP53TG3 | 33532156 | 8.9584  | 7.6753  | 0.4932  |
| CEU | TP53TG3 | 33537156 | 10.3117 | 8.5281  | 0.6223  |
| CEU | TP53TG3 | 33542156 | 8.0213  | 9.0398  | -0.3367 |
| CEU | TP53TG3 | 33547156 | 7.841   | 8.3576  | -0.1836 |
| CEU | TP53TG3 | 33552156 | 8.2907  | 7.6753  | 0.2365  |
| CEU | TP53TG3 | 33557156 | 5.6838  | 6.3108  | -0.2879 |
| CEU | TP53TG3 | 33562156 | 4.9375  | 4.7757  | 0.0952  |
| CEU | TP53TG3 | 33567156 | 9.0437  | 7.8459  | 0.4512  |
| CEU | TP53TG3 | 33572156 | 11.509  | 9.8926  | 0.4915  |
| CEU | TP53TG3 | 33577156 | 6.758   | 8.5281  | -0.6176 |
| CEU | TP53TG3 | 33582156 | 3.0917  | 7.6753  | -1.7618 |
| CEU | TP53TG3 | 33587156 | 3.2622  | 9.0398  | -1.9102 |
| CEU | TP53TG3 | 33592156 | 4.2931  | 13.1333 | -2.0599 |
| CEU | TP53TG3 | 33597156 | 3.1369  | 14.4978 | -2.4102 |
| CEU | TP53TG3 | 33602156 | 3.5991  | 15.0095 | -2.3421 |
| CEU | TP53TG3 | 33607156 | 4.4426  | 12.7922 | -1.9946 |
| CEU | TP53TG3 | 33612156 | 4.5106  | 11.5982 | -1.857  |
| CEU | TP53TG3 | 33617156 | 3.5615  | 12.2805 | -2.1647 |
| CEU | TP53TG3 | 33622156 | 2.4183  | 9.8926  | -2.2727 |
| CEU | TP53TG3 | 33627156 | 3.6094  | 7.3342  | -1.4924 |
| CEU | TP53TG3 | 33632156 | 3.4255  | 4.9463  | -0.8673 |
| CEU | TP53TG3 | 33637156 | 2.5595  | 3.5818  | -0.7705 |
| CEU | TP53TG3 | 33642156 | 2.1946  | 3.7524  | -1.1286 |
| CEU | TP53TG3 | 33647156 | 1.5547  | 5.7991  | -2.1022 |
| CEU | TP53TG3 | 33652156 | 1.1132  | 6.1402  | -2.3656 |
| CEU | TP53TG3 | 33657156 | 1.208   | 4.9463  | -2.1319 |
| CEU | TP53TG3 | 33662156 | 2.1565  | 5.9697  | -1.8403 |
| CEU | TP53TG3 | 33667156 | 1.2457  | 3.5818  | -1.7607 |
| CEU | TP53TG3 | 33672156 | 0.0606  | 0.8528  | -1.784  |
| CEU | TP53TG3 | 33677156 | 0.0202  | 0.3411  | -1.2864 |

## 2\_TajimasD\_data

|     |         |          |         |         |         |
|-----|---------|----------|---------|---------|---------|
| CEU | TP53TG3 | 33682156 | 0.0101  | 0.1706  | -0.9534 |
| CEU | TP53TG3 | 33687156 | 1.0903  | 1.5351  | -0.6596 |
| CEU | TP53TG3 | 33692156 | 1.8382  | 2.5584  | -0.7174 |
| CEU | TP53TG3 | 33697156 | 0.9926  | 1.7056  | -0.9765 |
| CEU | TP53TG3 | 33702156 | 1.1367  | 1.8762  | -0.9415 |
| CEU | TP53TG3 | 33707156 | 1.5902  | 4.7757  | -1.8735 |
| CEU | TP53TG3 | 33712156 | 1.758   | 7.1636  | -2.2128 |
| CEU | TP53TG3 | 33717156 | 3.2171  | 7.3342  | -1.6496 |
| CEU | TP53TG3 | 33722156 | 3.4974  | 7.3342  | -1.5373 |
| CEU | TP53TG3 | 33727156 | 1.865   | 6.1402  | -2.0118 |
| CEU | TP53TG3 | 33732156 | 3.383   | 6.8225  | -1.4718 |
| CEU | TP53TG3 | 33737156 | 3.8308  | 8.0164  | -1.546  |
| CEU | TP53TG3 | 33742156 | 1.3129  | 5.2874  | -2.1371 |
| CEU | TP53TG3 | 33747156 | 1.7438  | 3.5818  | -1.3853 |
| CEU | TP53TG3 | 33752156 | 2.6724  | 4.2641  | -1.0332 |
| CEU | TP53TG3 | 33757156 | 2.2618  | 3.2407  | -0.8027 |
| CEU | TP53TG3 | 33762156 | 2.7504  | 2.8996  | -0.1342 |
| CEU | TP53TG3 | 33767156 | 2.6059  | 4.7757  | -1.2761 |
| CEU | TP53TG3 | 33772156 | 1.7194  | 4.6052  | -1.7521 |
| CEU | TP53TG3 | 33777156 | 1.9796  | 3.5818  | -1.2076 |
| CEU | TP53TG3 | 33782156 | 2.7681  | 3.2407  | -0.3875 |
| CEU | TP53TG3 | 33787156 | 2.0066  | 3.9229  | -1.3366 |
| CEU | TP53TG3 | 33792156 | 1.2053  | 6.1402  | -2.3222 |
| CEU | TP53TG3 | 33797156 | 2.0744  | 9.0398  | -2.3029 |
| CEU | TP53TG3 | 33802156 | 1.5098  | 6.8225  | -2.2733 |
| CEU | TP53TG3 | 33807156 | 0.7192  | 3.0701  | -2.0166 |
| CEU | TP53TG3 | 33812156 | 1.8516  | 4.0935  | -1.5075 |
| CEU | TP53TG3 | 33817156 | 2.5226  | 8.0164  | -2.0292 |
| CEU | TP53TG3 | 33822156 | 2.295   | 10.4043 | -2.3525 |
| CEU | TP53TG3 | 33827156 | 1.7914  | 9.0398  | -2.3965 |
| CEU | TP53TG3 | 33832156 | 2.2527  | 7.5047  | -2.0606 |
| CEU | TP53TG3 | 33837156 | 2.8336  | 8.5281  | -1.9869 |
| CEU | TP53TG3 | 33842156 | 2.028   | 8.187   | -2.2313 |
| CEU | TP53TG3 | 33847156 | 2.9887  | 8.0164  | -1.857  |
| CEU | TP53TG3 | 33852156 | 4.06    | 11.7688 | -1.9922 |
| CEU | TP53TG3 | 33857156 | 2.5751  | 11.4277 | -2.352  |
| CEU | TP53TG3 | 33862156 | 5.933   | 11.0866 | -1.4087 |
| CEU | TP53TG3 | 33867156 | 13.0196 | 15.5212 | -0.4973 |
| CEU | TP53TG3 | 33872156 | 10.0049 | 15.1801 | -1.0509 |
| CEU | TP53TG3 | 33877156 | 3.2296  | 13.3039 | -2.3189 |
| CEU | TP53TG3 | 33882156 | 1.8013  | 12.6216 | -2.6178 |
| CEU | TP53TG3 | 33887156 | 2.9006  | 12.4511 | -2.3405 |
| CEU | TP53TG3 | 33892156 | 3.7149  | 18.4207 | -2.4814 |
| CEU | TP53TG3 | 33897156 | 4.786   | 19.6147 | -2.3555 |
| CEU | TP53TG3 | 33902156 | 4.4545  | 12.2805 | -1.943  |
| CEU | TP53TG3 | 33907156 | 2.4496  | 9.5515  | -2.2311 |
| CEU | TP53TG3 | 33912156 | 1.813   | 9.8926  | -2.4568 |
| CEU | TP53TG3 | 33917156 | 1.9309  | 11.7688 | -2.5424 |
| CEU | TP53TG3 | 33922156 | 2.6085  | 11.4277 | -2.3431 |



## 2\_TajimasD\_data

|     |         |          |        |         |         |
|-----|---------|----------|--------|---------|---------|
| CEU | TP53TG3 | 33927156 | 2.4919 | 8.3576  | -2.0851 |
| CEU | TP53TG3 | 33932156 | 2.4242 | 9.2104  | -2.2051 |
| CEU | TP53TG3 | 33937156 | 1.9186 | 9.0398  | -2.3544 |
| CEU | TP53TG3 | 33942156 | 1.5312 | 9.2104  | -2.4953 |
| CEU | TP53TG3 | 33947156 | 3.9788 | 12.6216 | -2.091  |
| CEU | TP53TG3 | 33952156 | 4.3643 | 14.6684 | -2.1619 |
| CEU | TP53TG3 | 33957156 | 2.0697 | 13.8156 | -2.6087 |
| CHB | TP53TG3 | 32962156 | 0.7645 | 3.2189  | -2.0179 |
| CHB | TP53TG3 | 32967156 | 1.131  | 1.1859  | -0.098  |
| CHB | TP53TG3 | 32972156 | 2.0327 | 2.2024  | -0.19   |
| CHB | TP53TG3 | 32977156 | 0.9678 | 1.5247  | -0.8274 |
| CHB | TP53TG3 | 32982156 | 0.5846 | 1.1859  | -1.0733 |
| CHB | TP53TG3 | 32987156 | 0.5749 | 1.0165  | -0.8788 |
| CHB | TP53TG3 | 32992156 | 0.0097 | 0.1694  | -0.949  |
| CHB | TP53TG3 | 32997156 | 0.5469 | 2.2024  | -1.8537 |
| CHB | TP53TG3 | 33002156 | 1.2696 | 3.7271  | -1.7853 |
| CHB | TP53TG3 | 33007156 | 0.8184 | 2.3718  | -1.6397 |
| CHB | TP53TG3 | 33012156 | 0.9008 | 3.2189  | -1.9058 |
| CHB | TP53TG3 | 33017156 | 1.1656 | 4.5742  | -2.0756 |
| CHB | TP53TG3 | 33022156 | 1.2595 | 3.5577  | -1.7369 |
| CHB | TP53TG3 | 33027156 | 1.5399 | 4.066   | -1.7034 |
| CHB | TP53TG3 | 33032156 | 1.004  | 3.8965  | -2.0231 |
| CHB | TP53TG3 | 33037156 | 1.0428 | 3.3883  | -1.8471 |
| CHB | TP53TG3 | 33042156 | 0.7282 | 2.8801  | -1.9402 |
| CHB | TP53TG3 | 33047156 | 0.1157 | 1.3553  | -2.009  |
| CHB | TP53TG3 | 33052156 | 0.9608 | 3.5577  | -1.9626 |
| CHB | TP53TG3 | 33057156 | 1.1315 | 4.7436  | -2.1307 |
| CHB | TP53TG3 | 33062156 | 1.0339 | 3.2189  | -1.7964 |
| CHB | TP53TG3 | 33067156 | 2.0493 | 3.2189  | -0.9616 |
| CHB | TP53TG3 | 33072156 | 2.9804 | 6.7766  | -1.6296 |
| CHB | TP53TG3 | 33077156 | 1.8321 | 5.4213  | -1.8821 |
| CHB | TP53TG3 | 33082156 | 0.518  | 1.1859  | -1.1922 |
| CHB | TP53TG3 | 33087156 | 0.5064 | 1.0165  | -1.0151 |
| CHB | TP53TG3 | 33092156 | 1.0651 | 0.6777  | 1.0128  |
| CHB | TP53TG3 | 33097156 | 0.9812 | 0.5082  | 1.4848  |
| CHB | TP53TG3 | 33102156 | 0.265  | 0.1694  | 0.5681  |
| CHB | TP53TG3 | 33107156 | 0.3415 | 0.6777  | -0.8789 |
| CHB | TP53TG3 | 33112156 | 0.0765 | 0.5082  | -1.3552 |
| CHB | TP53TG3 | 33117156 | 0      | 0       | 0       |
| CHB | TP53TG3 | 33122156 | 0.0194 | 0.3388  | -1.2812 |
| CHB | TP53TG3 | 33127156 | 0.0194 | 0.3388  | -1.2812 |
| CHB | TP53TG3 | 33132156 | 0      | 0       | 0       |
| CHB | TP53TG3 | 33137156 | 0      | 0       | 0       |
| CHB | TP53TG3 | 33142156 | 0.6421 | 0.5082  | 0.4203  |
| CHB | TP53TG3 | 33147156 | 0.6421 | 0.5082  | 0.4203  |
| CHB | TP53TG3 | 33152156 | 0      | 0       | 0       |
| CHB | TP53TG3 | 33157156 | 0      | 0       | 0       |
| CHB | TP53TG3 | 33162156 | 0      | 0       | 0       |
| CHB | TP53TG3 | 33167156 | 0      | 0       | 0       |

## 2\_TajimasD\_data

|     |         |          |         |        |         |
|-----|---------|----------|---------|--------|---------|
| CHB | TP53TG3 | 33172156 | 0.0388  | 0.5082 | -1.4735 |
| CHB | TP53TG3 | 33177156 | 0.0388  | 0.5082 | -1.4735 |
| CHB | TP53TG3 | 33182156 | 0       | 0      | 0       |
| CHB | TP53TG3 | 33187156 | 0       | 0      | 0       |
| CHB | TP53TG3 | 33192156 | 0       | 0      | 0       |
| CHB | TP53TG3 | 33197156 | 0.0192  | 0.1694 | -0.8925 |
| CHB | TP53TG3 | 33202156 | 0.0192  | 0.1694 | -0.8925 |
| CHB | TP53TG3 | 33207156 | 0.4104  | 0.1694 | 1.4321  |
| CHB | TP53TG3 | 33212156 | 0.4104  | 0.1694 | 1.4321  |
| CHB | TP53TG3 | 33217156 | 0       | 0      | 0       |
| CHB | TP53TG3 | 33222156 | 0       | 0      | 0       |
| CHB | TP53TG3 | 33227156 | 0       | 0      | 0       |
| CHB | TP53TG3 | 33232156 | 0.0097  | 0.1694 | -0.949  |
| CHB | TP53TG3 | 33237156 | 0.6528  | 0.5082 | 0.4539  |
| CHB | TP53TG3 | 33242156 | 0.6431  | 0.3388 | 1.2206  |
| CHB | TP53TG3 | 33247156 | 0.0097  | 0.1694 | -0.949  |
| CHB | TP53TG3 | 33252156 | 0.0097  | 0.1694 | -0.949  |
| CHB | TP53TG3 | 33257156 | 0       | 0      | 0       |
| CHB | TP53TG3 | 33262156 | 0       | 0      | 0       |
| CHB | TP53TG3 | 33267156 | 0       | 0      | 0       |
| CHB | TP53TG3 | 33272156 | 0       | 0      | 0       |
| CHB | TP53TG3 | 33277156 | 0       | 0      | 0       |
| CHB | TP53TG3 | 33282156 | 0       | 0      | 0       |
| CHB | TP53TG3 | 33287156 | 0       | 0      | 0       |
| CHB | TP53TG3 | 33292156 | 1.6564  | 1.8636 | -0.2644 |
| CHB | TP53TG3 | 33297156 | 1.8488  | 2.7106 | -0.8166 |
| CHB | TP53TG3 | 33302156 | 1.5858  | 1.3553 | 0.3736  |
| CHB | TP53TG3 | 33307156 | 3.5722  | 2.7106 | 0.8164  |
| CHB | TP53TG3 | 33312156 | 4.9751  | 5.2519 | -0.1493 |
| CHB | TP53TG3 | 33317156 | 4.8013  | 5.2519 | -0.243  |
| CHB | TP53TG3 | 33322156 | 3.297   | 5.0825 | -0.9913 |
| CHB | TP53TG3 | 33327156 | 1.9631  | 5.2519 | -1.7738 |
| CHB | TP53TG3 | 33332156 | 0.7973  | 3.7271 | -2.1284 |
| CHB | TP53TG3 | 33337156 | 0.7885  | 3.7271 | -2.1348 |
| CHB | TP53TG3 | 33342156 | 1.4653  | 4.7436 | -1.9338 |
| CHB | TP53TG3 | 33347156 | 2.039   | 7.2848 | -2.1086 |
| CHB | TP53TG3 | 33352156 | 2.0291  | 8.3013 | -2.237  |
| CHB | TP53TG3 | 33357156 | 2.0489  | 6.6072 | -2.0021 |
| CHB | TP53TG3 | 33362156 | 1.9237  | 7.1154 | -2.1321 |
| CHB | TP53TG3 | 33367156 | 1.8844  | 6.7766 | -2.1    |
| CHB | TP53TG3 | 33372156 | 1.6092  | 6.2684 | -2.1459 |
| CHB | TP53TG3 | 33377156 | 2.0615  | 7.2848 | -2.0996 |
| CHB | TP53TG3 | 33382156 | 5.9703  | 7.7931 | -0.6889 |
| CHB | TP53TG3 | 33387156 | 6.6777  | 6.946  | -0.1126 |
| CHB | TP53TG3 | 33392156 | 6.2043  | 7.1154 | -0.3742 |
| CHB | TP53TG3 | 33397156 | 5.4312  | 6.2684 | -0.3856 |
| CHB | TP53TG3 | 33402156 | 4.3522  | 5.2519 | -0.4852 |
| CHB | TP53TG3 | 33407156 | 4.0657  | 5.0825 | -0.5645 |
| CHB | TP53TG3 | 33412156 | 13.4246 | 9.6567 | 1.1683  |

## 2\_TajimasD\_data

|     |         |          |         |         |         |
|-----|---------|----------|---------|---------|---------|
| CHB | TP53TG3 | 33417156 | 23.2291 | 13.2144 | 2.3133  |
| CHB | TP53TG3 | 33422156 | 19.7398 | 11.1814 | 2.3141  |
| CHB | TP53TG3 | 33427156 | 12.3554 | 9.6567  | 0.8368  |
| CHB | TP53TG3 | 33432156 | 10.063  | 9.8261  | 0.0723  |
| CHB | TP53TG3 | 33437156 | 10.0126 | 10.6731 | -0.1866 |
| CHB | TP53TG3 | 33442156 | 8.968   | 9.6567  | -0.2136 |
| CHB | TP53TG3 | 33447156 | 11.4723 | 10.5037 | 0.2777  |
| CHB | TP53TG3 | 33452156 | 8.1393  | 9.9955  | -0.5574 |
| CHB | TP53TG3 | 33457156 | 2.9929  | 7.6237  | -1.7858 |
| CHB | TP53TG3 | 33462156 | 7.8458  | 10.6731 | -0.7985 |
| CHB | TP53TG3 | 33467156 | 11.6588 | 13.5532 | -0.4272 |
| CHB | TP53TG3 | 33472156 | 10.2572 | 12.7061 | -0.5871 |
| CHB | TP53TG3 | 33477156 | 14.6346 | 12.0285 | 0.6579  |
| CHB | TP53TG3 | 33482156 | 16.1277 | 13.2144 | 0.673   |
| CHB | TP53TG3 | 33487156 | 10.6518 | 11.5202 | -0.2283 |
| CHB | TP53TG3 | 33492156 | 6.5464  | 7.1154  | -0.2337 |
| CHB | TP53TG3 | 33497156 | 4.6901  | 6.7766  | -0.8957 |
| CHB | TP53TG3 | 33502156 | 4.8346  | 8.979   | -1.3748 |
| CHB | TP53TG3 | 33507156 | 11.4338 | 11.8591 | -0.1088 |
| CHB | TP53TG3 | 33512156 | 11.2703 | 10.8426 | 0.119   |
| CHB | TP53TG3 | 33517156 | 6.3263  | 7.9625  | -0.6063 |
| CHB | TP53TG3 | 33522156 | 7.3687  | 6.2684  | 0.5068  |
| CHB | TP53TG3 | 33527156 | 7.3727  | 6.2684  | 0.5086  |
| CHB | TP53TG3 | 33532156 | 7.6099  | 6.946   | 0.2787  |
| CHB | TP53TG3 | 33537156 | 8.9185  | 8.4708  | 0.1567  |
| CHB | TP53TG3 | 33542156 | 6.4672  | 8.1319  | -0.6051 |
| CHB | TP53TG3 | 33547156 | 6.356   | 7.2848  | -0.3733 |
| CHB | TP53TG3 | 33552156 | 7.8536  | 8.1319  | -0.1012 |
| CHB | TP53TG3 | 33557156 | 5.4575  | 5.9295  | -0.2285 |
| CHB | TP53TG3 | 33562156 | 4.2437  | 4.066   | 0.1198  |
| CHB | TP53TG3 | 33567156 | 8.665   | 6.946   | 0.7216  |
| CHB | TP53TG3 | 33572156 | 10.2469 | 9.4872  | 0.2395  |
| CHB | TP53TG3 | 33577156 | 5.0598  | 6.2684  | -0.5566 |
| CHB | TP53TG3 | 33582156 | 2.4418  | 4.4048  | -1.2352 |
| CHB | TP53TG3 | 33587156 | 2.7767  | 5.7601  | -1.4822 |
| CHB | TP53TG3 | 33592156 | 3.5083  | 6.6072  | -1.3611 |
| CHB | TP53TG3 | 33597156 | 2.744   | 6.6072  | -1.6968 |
| CHB | TP53TG3 | 33602156 | 2.407   | 6.2684  | -1.7784 |
| CHB | TP53TG3 | 33607156 | 2.6783  | 6.0989  | -1.6147 |
| CHB | TP53TG3 | 33612156 | 2.8123  | 5.7601  | -1.4645 |
| CHB | TP53TG3 | 33617156 | 1.6286  | 5.2519  | -1.9542 |
| CHB | TP53TG3 | 33622156 | 1.0213  | 4.066   | -2.0531 |
| CHB | TP53TG3 | 33627156 | 2.395   | 3.8965  | -1.0502 |
| CHB | TP53TG3 | 33632156 | 2.5287  | 3.2189  | -0.5674 |
| CHB | TP53TG3 | 33637156 | 2.3284  | 1.8636  | 0.593   |
| CHB | TP53TG3 | 33642156 | 1.9785  | 2.033   | -0.065  |
| CHB | TP53TG3 | 33647156 | 1.0994  | 2.5412  | -1.4397 |
| CHB | TP53TG3 | 33652156 | 0.6273  | 2.3718  | -1.8415 |
| CHB | TP53TG3 | 33657156 | 1.5134  | 2.8801  | -1.2322 |

## 2\_TajimasD\_data

|     |         |          |         |         |         |
|-----|---------|----------|---------|---------|---------|
| CHB | TP53TG3 | 33662156 | 2.1551  | 5.0825  | -1.6252 |
| CHB | TP53TG3 | 33667156 | 0.7676  | 3.5577  | -2.1086 |
| CHB | TP53TG3 | 33672156 | 0.0676  | 0.5082  | -1.3831 |
| CHB | TP53TG3 | 33677156 | 0       | 0       | 0       |
| CHB | TP53TG3 | 33682156 | 0.0386  | 0.3388  | -1.2042 |
| CHB | TP53TG3 | 33687156 | 0.4634  | 1.3553  | -1.4455 |
| CHB | TP53TG3 | 33692156 | 0.9572  | 2.3718  | -1.4932 |
| CHB | TP53TG3 | 33697156 | 0.8007  | 2.2024  | -1.5695 |
| CHB | TP53TG3 | 33702156 | 1.055   | 1.5247  | -0.6978 |
| CHB | TP53TG3 | 33707156 | 1.8633  | 3.3883  | -1.201  |
| CHB | TP53TG3 | 33712156 | 1.8907  | 5.5907  | -1.8878 |
| CHB | TP53TG3 | 33717156 | 2.9534  | 6.6072  | -1.6048 |
| CHB | TP53TG3 | 33722156 | 2.9383  | 6.6072  | -1.6114 |
| CHB | TP53TG3 | 33727156 | 1.2157  | 4.4048  | -2.0067 |
| CHB | TP53TG3 | 33732156 | 2.8096  | 5.5907  | -1.419  |
| CHB | TP53TG3 | 33737156 | 3.2559  | 6.6072  | -1.4719 |
| CHB | TP53TG3 | 33742156 | 1.1523  | 4.066   | -1.9648 |
| CHB | TP53TG3 | 33747156 | 1.3415  | 3.7271  | -1.7331 |
| CHB | TP53TG3 | 33752156 | 1.9996  | 3.3883  | -1.0936 |
| CHB | TP53TG3 | 33757156 | 1.795   | 1.6942  | 0.1383  |
| CHB | TP53TG3 | 33762156 | 2.4774  | 2.5412  | -0.0637 |
| CHB | TP53TG3 | 33767156 | 2.325   | 3.3883  | -0.8374 |
| CHB | TP53TG3 | 33772156 | 2.3229  | 4.5742  | -1.3709 |
| CHB | TP53TG3 | 33777156 | 2.3251  | 4.066   | -1.1739 |
| CHB | TP53TG3 | 33782156 | 2.2441  | 3.3883  | -0.9011 |
| CHB | TP53TG3 | 33787156 | 1.7205  | 4.7436  | -1.7833 |
| CHB | TP53TG3 | 33792156 | 1.3185  | 5.9295  | -2.2323 |
| CHB | TP53TG3 | 33797156 | 1.7856  | 5.7601  | -1.9746 |
| CHB | TP53TG3 | 33802156 | 1.704   | 3.2189  | -1.2455 |
| CHB | TP53TG3 | 33807156 | 1.6294  | 1.8636  | -0.2988 |
| CHB | TP53TG3 | 33812156 | 1.1959  | 2.5412  | -1.3434 |
| CHB | TP53TG3 | 33817156 | 1.7192  | 6.2684  | -2.0952 |
| CHB | TP53TG3 | 33822156 | 2.0175  | 9.1484  | -2.3249 |
| CHB | TP53TG3 | 33827156 | 1.0925  | 6.7766  | -2.44   |
| CHB | TP53TG3 | 33832156 | 1.3284  | 5.7601  | -2.2018 |
| CHB | TP53TG3 | 33837156 | 2.2387  | 6.6072  | -1.9187 |
| CHB | TP53TG3 | 33842156 | 1.9284  | 6.2684  | -1.9988 |
| CHB | TP53TG3 | 33847156 | 2.26    | 7.9625  | -2.1132 |
| CHB | TP53TG3 | 33852156 | 3.0337  | 7.4543  | -1.7401 |
| CHB | TP53TG3 | 33857156 | 2.1772  | 6.4378  | -1.9157 |
| CHB | TP53TG3 | 33862156 | 3.7101  | 9.6567  | -1.8439 |
| CHB | TP53TG3 | 33867156 | 10.8957 | 14.0615 | -0.6894 |
| CHB | TP53TG3 | 33872156 | 8.9886  | 14.5697 | -1.1751 |
| CHB | TP53TG3 | 33877156 | 1.9876  | 12.3673 | -2.5526 |
| CHB | TP53TG3 | 33882156 | 1.9322  | 12.3673 | -2.5662 |
| CHB | TP53TG3 | 33887156 | 2.4462  | 12.8755 | -2.4691 |
| CHB | TP53TG3 | 33892156 | 1.9117  | 12.0285 | -2.554  |
| CHB | TP53TG3 | 33897156 | 4.525   | 12.5367 | -1.9451 |
| CHB | TP53TG3 | 33902156 | 5.1348  | 10.6731 | -1.5642 |

## 2\_TajimasD\_data

|     |         |          |        |         |         |
|-----|---------|----------|--------|---------|---------|
| CHB | TP53TG3 | 33907156 | 1.8218 | 6.7766  | -2.1269 |
| CHB | TP53TG3 | 33912156 | 1.0563 | 6.0989  | -2.3803 |
| CHB | TP53TG3 | 33917156 | 1.5753 | 6.2684  | -2.1615 |
| CHB | TP53TG3 | 33922156 | 1.8989 | 6.946   | -2.1186 |
| CHB | TP53TG3 | 33927156 | 2.0613 | 7.9625  | -2.1868 |
| CHB | TP53TG3 | 33932156 | 2.509  | 7.9625  | -2.0209 |
| CHB | TP53TG3 | 33937156 | 1.9395 | 6.946   | -2.1015 |
| CHB | TP53TG3 | 33942156 | 1.1797 | 7.2848  | -2.454  |
| CHB | TP53TG3 | 33947156 | 3.8205 | 8.8096  | -1.6845 |
| CHB | TP53TG3 | 33952156 | 4.458  | 7.7931  | -1.2605 |
| CHB | TP53TG3 | 33957156 | 1.6284 | 7.1154  | -2.2533 |
| YRI | TP53TG3 | 32962156 | 2.1502 | 5.378   | -1.6987 |
| YRI | TP53TG3 | 32967156 | 1.2233 | 1.8487  | -0.7999 |
| YRI | TP53TG3 | 32972156 | 2.0367 | 4.3696  | -1.4731 |
| YRI | TP53TG3 | 32977156 | 2.0172 | 5.5461  | -1.8071 |
| YRI | TP53TG3 | 32982156 | 1.2767 | 2.5209  | -1.246  |
| YRI | TP53TG3 | 32987156 | 0.3357 | 0.6722  | -0.8809 |
| YRI | TP53TG3 | 32992156 | 0.1533 | 0.6722  | -1.3584 |
| YRI | TP53TG3 | 32997156 | 0.9835 | 3.1932  | -1.8224 |
| YRI | TP53TG3 | 33002156 | 1.7157 | 7.0586  | -2.2026 |
| YRI | TP53TG3 | 33007156 | 1.2097 | 5.8822  | -2.2704 |
| YRI | TP53TG3 | 33012156 | 0.9018 | 3.5293  | -1.9922 |
| YRI | TP53TG3 | 33017156 | 1.1109 | 5.378   | -2.2457 |
| YRI | TP53TG3 | 33022156 | 1.3883 | 6.2183  | -2.2329 |
| YRI | TP53TG3 | 33027156 | 1.7451 | 4.3696  | -1.6572 |
| YRI | TP53TG3 | 33032156 | 1.6023 | 4.3696  | -1.7473 |
| YRI | TP53TG3 | 33037156 | 2.003  | 7.5628  | -2.1524 |
| YRI | TP53TG3 | 33042156 | 1.5752 | 5.7141  | -2.0639 |
| YRI | TP53TG3 | 33047156 | 1.0744 | 2.3529  | -1.3534 |
| YRI | TP53TG3 | 33052156 | 1.8776 | 5.7141  | -1.9131 |
| YRI | TP53TG3 | 33057156 | 2.2316 | 8.5712  | -2.1878 |
| YRI | TP53TG3 | 33062156 | 1.8329 | 6.0502  | -1.9982 |
| YRI | TP53TG3 | 33067156 | 3.5071 | 7.2267  | -1.5009 |
| YRI | TP53TG3 | 33072156 | 4.2674 | 10.2518 | -1.7491 |
| YRI | TP53TG3 | 33077156 | 1.4491 | 5.0419  | -2.0018 |
| YRI | TP53TG3 | 33082156 | 0.3698 | 1.8487  | -1.8916 |
| YRI | TP53TG3 | 33087156 | 0.4065 | 2.0167  | -1.9252 |
| YRI | TP53TG3 | 33092156 | 0.1195 | 1.0084  | -1.7722 |
| YRI | TP53TG3 | 33097156 | 0.0736 | 0.6722  | -1.5671 |
| YRI | TP53TG3 | 33102156 | 0.4162 | 0.3361  | 0.3216  |
| YRI | TP53TG3 | 33107156 | 0.4968 | 0.5042  | -0.0233 |
| YRI | TP53TG3 | 33112156 | 0.1174 | 0.6722  | -1.4524 |
| YRI | TP53TG3 | 33117156 | 0.0369 | 0.5042  | -1.4686 |
| YRI | TP53TG3 | 33122156 | 0      | 0       | 0       |
| YRI | TP53TG3 | 33127156 | 0      | 0       | 0       |
| YRI | TP53TG3 | 33132156 | 0      | 0       | 0       |
| YRI | TP53TG3 | 33137156 | 0      | 0       | 0       |
| YRI | TP53TG3 | 33142156 | 1.0444 | 1.3445  | -0.4874 |
| YRI | TP53TG3 | 33147156 | 1.0444 | 1.3445  | -0.4874 |

## 2\_TajimasD\_data

|     |         |          |        |         |         |
|-----|---------|----------|--------|---------|---------|
| YRI | TP53TG3 | 33152156 | 0      | 0       | 0       |
| YRI | TP53TG3 | 33157156 | 0      | 0       | 0       |
| YRI | TP53TG3 | 33162156 | 0      | 0       | 0       |
| YRI | TP53TG3 | 33167156 | 0      | 0       | 0       |
| YRI | TP53TG3 | 33172156 | 0.046  | 0.3361  | -1.1646 |
| YRI | TP53TG3 | 33177156 | 0.046  | 0.3361  | -1.1646 |
| YRI | TP53TG3 | 33182156 | 0      | 0       | 0       |
| YRI | TP53TG3 | 33187156 | 0      | 0       | 0       |
| YRI | TP53TG3 | 33192156 | 0      | 0       | 0       |
| YRI | TP53TG3 | 33197156 | 0.0276 | 0.1681  | -0.8352 |
| YRI | TP53TG3 | 33202156 | 0.0276 | 0.1681  | -0.8352 |
| YRI | TP53TG3 | 33207156 | 0.0538 | 0.1681  | -0.6795 |
| YRI | TP53TG3 | 33212156 | 0.0538 | 0.1681  | -0.6795 |
| YRI | TP53TG3 | 33217156 | 0      | 0       | 0       |
| YRI | TP53TG3 | 33222156 | 0      | 0       | 0       |
| YRI | TP53TG3 | 33227156 | 0      | 0       | 0       |
| YRI | TP53TG3 | 33232156 | 0      | 0       | 0       |
| YRI | TP53TG3 | 33237156 | 1.0032 | 0.5042  | 1.5682  |
| YRI | TP53TG3 | 33242156 | 1.0125 | 0.6722  | 0.8909  |
| YRI | TP53TG3 | 33247156 | 0.0093 | 0.1681  | -0.944  |
| YRI | TP53TG3 | 33252156 | 0      | 0       | 0       |
| YRI | TP53TG3 | 33257156 | 0      | 0       | 0       |
| YRI | TP53TG3 | 33262156 | 0      | 0       | 0       |
| YRI | TP53TG3 | 33267156 | 0      | 0       | 0       |
| YRI | TP53TG3 | 33272156 | 0      | 0       | 0       |
| YRI | TP53TG3 | 33277156 | 0      | 0       | 0       |
| YRI | TP53TG3 | 33282156 | 0      | 0       | 0       |
| YRI | TP53TG3 | 33287156 | 0      | 0       | 0       |
| YRI | TP53TG3 | 33292156 | 1.877  | 4.2016  | -1.5185 |
| YRI | TP53TG3 | 33297156 | 2.2276 | 6.0502  | -1.8112 |
| YRI | TP53TG3 | 33302156 | 1.9795 | 3.0251  | -0.902  |
| YRI | TP53TG3 | 33307156 | 4.1681 | 4.5377  | -0.2258 |
| YRI | TP53TG3 | 33312156 | 5.0057 | 6.8906  | -0.7942 |
| YRI | TP53TG3 | 33317156 | 4.9258 | 7.2267  | -0.9285 |
| YRI | TP53TG3 | 33322156 | 4.1954 | 7.3947  | -1.2642 |
| YRI | TP53TG3 | 33327156 | 3.5922 | 7.2267  | -1.4666 |
| YRI | TP53TG3 | 33332156 | 2.5128 | 5.2099  | -1.4599 |
| YRI | TP53TG3 | 33337156 | 2.0145 | 5.7141  | -1.8448 |
| YRI | TP53TG3 | 33342156 | 2.4931 | 8.235   | -2.0559 |
| YRI | TP53TG3 | 33347156 | 2.5791 | 11.5963 | -2.3481 |
| YRI | TP53TG3 | 33352156 | 3.3101 | 12.7727 | -2.2496 |
| YRI | TP53TG3 | 33357156 | 4.0119 | 12.2685 | -2.039  |
| YRI | TP53TG3 | 33362156 | 3.6363 | 12.6047 | -2.1589 |
| YRI | TP53TG3 | 33367156 | 3.4772 | 10.756  | -2.034  |
| YRI | TP53TG3 | 33372156 | 6.1027 | 16.134  | -1.9099 |
| YRI | TP53TG3 | 33377156 | 7.8597 | 19.8313 | -1.87   |
| YRI | TP53TG3 | 33382156 | 8.0688 | 13.445  | -1.2176 |
| YRI | TP53TG3 | 33387156 | 7.3575 | 8.5712  | -0.4189 |
| YRI | TP53TG3 | 33392156 | 7.3978 | 9.0754  | -0.5492 |

## 2\_TajimasD\_data

|     |         |          |         |         |         |
|-----|---------|----------|---------|---------|---------|
| YRI | TP53TG3 | 33397156 | 6.8969  | 9.7476  | -0.8733 |
| YRI | TP53TG3 | 33402156 | 5.5347  | 8.235   | -0.9669 |
| YRI | TP53TG3 | 33407156 | 4.7085  | 7.7309  | -1.1468 |
| YRI | TP53TG3 | 33412156 | 15.2573 | 12.1005 | 0.7898  |
| YRI | TP53TG3 | 33417156 | 26.1061 | 16.9743 | 1.6563  |
| YRI | TP53TG3 | 33422156 | 21.527  | 14.6214 | 1.4442  |
| YRI | TP53TG3 | 33427156 | 14.1486 | 12.6047 | 0.3717  |
| YRI | TP53TG3 | 33432156 | 13.9969 | 17.8146 | -0.6611 |
| YRI | TP53TG3 | 33437156 | 13.5959 | 17.8146 | -0.7305 |
| YRI | TP53TG3 | 33442156 | 12.0703 | 13.2769 | -0.2765 |
| YRI | TP53TG3 | 33447156 | 15.2766 | 13.7811 | 0.3308  |
| YRI | TP53TG3 | 33452156 | 10.5721 | 12.1005 | -0.3824 |
| YRI | TP53TG3 | 33457156 | 5.5572  | 10.2518 | -1.3721 |
| YRI | TP53TG3 | 33462156 | 12.4572 | 12.9408 | -0.1136 |
| YRI | TP53TG3 | 33467156 | 17.2471 | 17.3104 | -0.0113 |
| YRI | TP53TG3 | 33472156 | 16.5563 | 18.1507 | -0.2712 |
| YRI | TP53TG3 | 33477156 | 18.6604 | 16.302  | 0.4446  |
| YRI | TP53TG3 | 33482156 | 20.9576 | 17.1423 | 0.6855  |
| YRI | TP53TG3 | 33487156 | 16.2566 | 16.134  | 0.0233  |
| YRI | TP53TG3 | 33492156 | 8.2431  | 11.0921 | -0.7735 |
| YRI | TP53TG3 | 33497156 | 5.9598  | 9.5795  | -1.1269 |
| YRI | TP53TG3 | 33502156 | 8.326   | 11.7644 | -0.8833 |
| YRI | TP53TG3 | 33507156 | 16.5363 | 14.4534 | 0.4404  |
| YRI | TP53TG3 | 33512156 | 16.4722 | 13.7811 | 0.5954  |
| YRI | TP53TG3 | 33517156 | 9.5625  | 10.756  | -0.3335 |
| YRI | TP53TG3 | 33522156 | 9.0881  | 11.4282 | -0.6178 |
| YRI | TP53TG3 | 33527156 | 9.2334  | 10.924  | -0.4656 |
| YRI | TP53TG3 | 33532156 | 9.4505  | 9.7476  | -0.091  |
| YRI | TP53TG3 | 33537156 | 12.5285 | 11.5963 | 0.2428  |
| YRI | TP53TG3 | 33542156 | 10.3094 | 11.7644 | -0.3738 |
| YRI | TP53TG3 | 33547156 | 9.2825  | 10.924  | -0.4521 |
| YRI | TP53TG3 | 33552156 | 10.6159 | 11.0921 | -0.1293 |
| YRI | TP53TG3 | 33557156 | 8.3367  | 9.9157  | -0.4761 |
| YRI | TP53TG3 | 33562156 | 7.1633  | 8.067   | -0.3298 |
| YRI | TP53TG3 | 33567156 | 10.8256 | 11.4282 | -0.1591 |
| YRI | TP53TG3 | 33572156 | 13.1205 | 15.1256 | -0.406  |
| YRI | TP53TG3 | 33577156 | 9.9515  | 12.7727 | -0.6707 |
| YRI | TP53TG3 | 33582156 | 7.1295  | 10.2518 | -0.9126 |
| YRI | TP53TG3 | 33587156 | 10.2297 | 14.1172 | -0.8406 |
| YRI | TP53TG3 | 33592156 | 17.1502 | 17.4785 | -0.0579 |
| YRI | TP53TG3 | 33597156 | 19.5059 | 16.4701 | 0.5667  |
| YRI | TP53TG3 | 33602156 | 18.8133 | 17.8146 | 0.1729  |
| YRI | TP53TG3 | 33607156 | 19.948  | 20.8397 | -0.1328 |
| YRI | TP53TG3 | 33612156 | 21.5619 | 20.8397 | 0.1075  |
| YRI | TP53TG3 | 33617156 | 18.089  | 17.9827 | 0.0182  |
| YRI | TP53TG3 | 33622156 | 12.9729 | 14.6214 | -0.3448 |
| YRI | TP53TG3 | 33627156 | 7.9513  | 11.4282 | -0.9179 |
| YRI | TP53TG3 | 33632156 | 4.2028  | 7.2267  | -1.2202 |
| YRI | TP53TG3 | 33637156 | 3.4549  | 5.0419  | -0.8842 |

## 2\_TajimasD\_data

|     |         |          |         |         |         |
|-----|---------|----------|---------|---------|---------|
| YRI | TP53TG3 | 33642156 | 2.8609  | 5.378   | -1.3247 |
| YRI | TP53TG3 | 33647156 | 4.2253  | 7.0586  | -1.168  |
| YRI | TP53TG3 | 33652156 | 5.4756  | 8.4031  | -1.0289 |
| YRI | TP53TG3 | 33657156 | 4.0376  | 6.3864  | -1.0601 |
| YRI | TP53TG3 | 33662156 | 4.8099  | 7.7309  | -1.1083 |
| YRI | TP53TG3 | 33667156 | 2.9759  | 5.2099  | -1.2092 |
| YRI | TP53TG3 | 33672156 | 0.2137  | 1.1764  | -1.7218 |
| YRI | TP53TG3 | 33677156 | 0.2137  | 1.0084  | -1.5844 |
| YRI | TP53TG3 | 33682156 | 0.0276  | 0.1681  | -0.8352 |
| YRI | TP53TG3 | 33687156 | 1.7405  | 1.3445  | 0.6432  |
| YRI | TP53TG3 | 33692156 | 3.3409  | 3.5293  | -0.1428 |
| YRI | TP53TG3 | 33697156 | 2.1798  | 3.0251  | -0.7292 |
| YRI | TP53TG3 | 33702156 | 1.495   | 2.8571  | -1.2318 |
| YRI | TP53TG3 | 33707156 | 1.8384  | 6.8906  | -2.1288 |
| YRI | TP53TG3 | 33712156 | 2.8492  | 9.9157  | -2.1306 |
| YRI | TP53TG3 | 33717156 | 4.3461  | 9.4115  | -1.6032 |
| YRI | TP53TG3 | 33722156 | 5.2085  | 9.7476  | -1.3905 |
| YRI | TP53TG3 | 33727156 | 3.7715  | 7.5628  | -1.4677 |
| YRI | TP53TG3 | 33732156 | 4.9446  | 7.7309  | -1.0572 |
| YRI | TP53TG3 | 33737156 | 6.0682  | 9.9157  | -1.16   |
| YRI | TP53TG3 | 33742156 | 2.652   | 7.5628  | -1.9011 |
| YRI | TP53TG3 | 33747156 | 1.827   | 6.5544  | -2.0842 |
| YRI | TP53TG3 | 33752156 | 2.1689  | 4.8738  | -1.5527 |
| YRI | TP53TG3 | 33757156 | 1.3167  | 2.689   | -1.3042 |
| YRI | TP53TG3 | 33762156 | 3.1907  | 4.3696  | -0.7444 |
| YRI | TP53TG3 | 33767156 | 4.0794  | 5.2099  | -0.6119 |
| YRI | TP53TG3 | 33772156 | 3.5494  | 6.2183  | -1.2338 |
| YRI | TP53TG3 | 33777156 | 3.4088  | 5.7141  | -1.1495 |
| YRI | TP53TG3 | 33782156 | 3.508   | 5.378   | -0.9841 |
| YRI | TP53TG3 | 33787156 | 4.4311  | 7.5628  | -1.2124 |
| YRI | TP53TG3 | 33792156 | 5.5727  | 9.9157  | -1.3094 |
| YRI | TP53TG3 | 33797156 | 10.4597 | 13.2769 | -0.6457 |
| YRI | TP53TG3 | 33802156 | 7.9884  | 9.4115  | -0.4504 |
| YRI | TP53TG3 | 33807156 | 2.526   | 4.3696  | -1.1641 |
| YRI | TP53TG3 | 33812156 | 4.1855  | 5.0419  | -0.4772 |
| YRI | TP53TG3 | 33817156 | 7.4709  | 11.9324 | -1.131  |
| YRI | TP53TG3 | 33822156 | 9.8725  | 16.4701 | -1.2317 |
| YRI | TP53TG3 | 33827156 | 8.4097  | 12.2685 | -0.9529 |
| YRI | TP53TG3 | 33832156 | 4.5337  | 8.067   | -1.2893 |
| YRI | TP53TG3 | 33837156 | 5.9168  | 8.5712  | -0.916  |
| YRI | TP53TG3 | 33842156 | 7.6521  | 10.5879 | -0.8326 |
| YRI | TP53TG3 | 33847156 | 5.5973  | 11.9324 | -1.6059 |
| YRI | TP53TG3 | 33852156 | 7.8528  | 16.4701 | -1.6087 |
| YRI | TP53TG3 | 33857156 | 9.3667  | 16.8062 | -1.3622 |
| YRI | TP53TG3 | 33862156 | 8.8003  | 14.6214 | -1.2174 |
| YRI | TP53TG3 | 33867156 | 14.3866 | 19.3272 | -0.7911 |
| YRI | TP53TG3 | 33872156 | 15.2232 | 23.5287 | -1.0998 |
| YRI | TP53TG3 | 33877156 | 10.197  | 22.6884 | -1.7134 |
| YRI | TP53TG3 | 33882156 | 11.7785 | 22.0162 | -1.4457 |



## 2\_TajimasD\_data

|     |          |          |         |         |         |
|-----|----------|----------|---------|---------|---------|
| YRI | TP53TG3  | 33887156 | 12.2495 | 19.8313 | -1.1843 |
| YRI | TP53TG3  | 33892156 | 12.7127 | 21.8481 | -1.2997 |
| YRI | TP53TG3  | 33897156 | 15.2141 | 22.5203 | -1.0094 |
| YRI | TP53TG3  | 33902156 | 10.7882 | 14.2853 | -0.7477 |
| YRI | TP53TG3  | 33907156 | 8.4615  | 11.4282 | -0.7832 |
| YRI | TP53TG3  | 33912156 | 9.269   | 11.7644 | -0.6411 |
| YRI | TP53TG3  | 33917156 | 10.4925 | 12.9408 | -0.5749 |
| YRI | TP53TG3  | 33922156 | 9.8186  | 11.9324 | -0.5358 |
| YRI | TP53TG3  | 33927156 | 6.5029  | 12.6047 | -1.4689 |
| YRI | TP53TG3  | 33932156 | 7.5868  | 14.6214 | -1.4712 |
| YRI | TP53TG3  | 33937156 | 7.6337  | 11.7644 | -1.0612 |
| YRI | TP53TG3  | 33942156 | 8.5751  | 11.4282 | -0.7532 |
| YRI | TP53TG3  | 33947156 | 12.8346 | 13.9492 | -0.2438 |
| YRI | TP53TG3  | 33952156 | 14.8288 | 17.4785 | -0.4673 |
| YRI | TP53TG3  | 33957156 | 15.7458 | 19.4952 | -0.5954 |
| CEU | TRIM49L1 | 89429064 | 7.2781  | 7.5047  | -0.0889 |
| CEU | TRIM49L1 | 89434064 | 3.1274  | 4.7757  | -0.9694 |
| CEU | TRIM49L1 | 89439064 | 7.7382  | 5.6286  | 1.0731  |
| CEU | TRIM49L1 | 89444064 | 10.84   | 6.8225  | 1.7191  |
| CEU | TRIM49L1 | 89449064 | 10.364  | 8.0164  | 0.8671  |
| CEU | TRIM49L1 | 89454064 | 10.8112 | 8.6987  | 0.7237  |
| CEU | TRIM49L1 | 89459064 | 17.9126 | 9.8926  | 2.4386  |
| CEU | TRIM49L1 | 89464064 | 14.2816 | 8.5281  | 2.0075  |
| CEU | TRIM49L1 | 89469064 | 3.9006  | 4.9463  | -0.5964 |
| CEU | TRIM49L1 | 89474064 | 3.1346  | 4.9463  | -1.0332 |
| CEU | TRIM49L1 | 89479064 | 2.7914  | 5.1169  | -1.2872 |
| CEU | TRIM49L1 | 89484064 | 6.1117  | 7.1636  | -0.4306 |
| CEU | TRIM49L1 | 89489064 | 7.3105  | 7.8459  | -0.2017 |
| CEU | TRIM49L1 | 89494064 | 3.0895  | 4.7757  | -0.9917 |
| CEU | TRIM49L1 | 89499064 | 3.5424  | 6.1402  | -1.2225 |
| CEU | TRIM49L1 | 89504064 | 3.8553  | 6.6519  | -1.2244 |
| CEU | TRIM49L1 | 89509064 | 1.8819  | 3.2407  | -1.1142 |
| CEU | TRIM49L1 | 89514064 | 1.9184  | 3.5818  | -1.2537 |
| CEU | TRIM49L1 | 89519064 | 2.7361  | 4.9463  | -1.2605 |
| CEU | TRIM49L1 | 89524064 | 3.411   | 5.6286  | -1.128  |
| CEU | TRIM49L1 | 89529064 | 3.4527  | 6.9931  | -1.4814 |
| CEU | TRIM49L1 | 89534064 | 3.2828  | 5.7991  | -1.2463 |
| CEU | TRIM49L1 | 89539064 | 3.3001  | 3.9229  | -0.4344 |
| CEU | TRIM49L1 | 89544064 | 7.4108  | 8.0164  | -0.2237 |
| CEU | TRIM49L1 | 89549064 | 6.9363  | 6.8225  | 0.0487  |
| CEU | TRIM49L1 | 89554064 | 2.1084  | 1.3645  | 1.2035  |
| CEU | TRIM49L1 | 89559064 | 1.9887  | 1.7056  | 0.3877  |
| CEU | TRIM49L1 | 89564064 | 2.8248  | 4.4346  | -1.01   |
| CEU | TRIM49L1 | 89569064 | 1.8388  | 4.4346  | -1.6287 |
| CEU | TRIM49L1 | 89574064 | 1.0198  | 1.5351  | -0.7641 |
| CEU | TRIM49L1 | 89579064 | 1.12    | 0.5117  | 1.9078  |
| CEU | TRIM49L1 | 89584064 | 0.7881  | 0.3411  | 1.7919  |
| CEU | TRIM49L1 | 89589064 | 1.6294  | 0.8528  | 1.7489  |
| CEU | TRIM49L1 | 89594064 | 1.276   | 1.3645  | -0.1432 |

## 2\_TajimasD\_data

|     |          |          |        |        |         |
|-----|----------|----------|--------|--------|---------|
| CEU | TRIM49L1 | 89599064 | 0.5638 | 2.2173 | -1.8473 |
| CEU | TRIM49L1 | 89604064 | 1.9955 | 4.0935 | -1.4108 |
| CEU | TRIM49L1 | 89609064 | 3.1313 | 4.7757 | -0.9671 |
| CEU | TRIM49L1 | 89614064 | 1.8254 | 3.0701 | -1.0677 |
| CEU | TRIM49L1 | 89619064 | 1.6539 | 1.8762 | -0.283  |
| CEU | TRIM49L1 | 89624064 | 1.8365 | 2.2173 | -0.4254 |
| CEU | TRIM49L1 | 89629064 | 1.2259 | 2.2173 | -1.1076 |
| CEU | TRIM49L1 | 89634064 | 0.9728 | 1.5351 | -0.8338 |
| CEU | TRIM49L1 | 89639064 | 1.9524 | 2.3879 | -0.4586 |
| CEU | TRIM49L1 | 89644064 | 2.2684 | 2.8996 | -0.5677 |
| CEU | TRIM49L1 | 89649064 | 1.275  | 2.0467 | -0.9182 |
| CEU | TRIM49L1 | 89654064 | 5.0633 | 5.2874 | -0.1205 |
| CEU | TRIM49L1 | 89659064 | 4.3069 | 4.2641 | 0.0278  |
| CEU | TRIM49L1 | 89664064 | 0.1268 | 0.3411 | -0.8591 |
| CEU | TRIM49L1 | 89669064 | 0.1268 | 0.3411 | -0.8591 |
| CEU | TRIM49L1 | 89674064 | 0.1055 | 0.1706 | -0.3867 |
| CEU | TRIM49L1 | 89679064 | 0.8229 | 0.8528 | -0.0673 |
| CEU | TRIM49L1 | 89684064 | 0.7275 | 0.8528 | -0.2822 |
| CEU | TRIM49L1 | 89689064 | 0.0202 | 0.3411 | -1.2864 |
| CEU | TRIM49L1 | 89694064 | 0.187  | 0.5117 | -1.0183 |
| CEU | TRIM49L1 | 89699064 | 0.6514 | 0.8528 | -0.4535 |
| CEU | TRIM49L1 | 89704064 | 0.8928 | 1.0234 | -0.2595 |
| CEU | TRIM49L1 | 89709064 | 0.8728 | 1.5351 | -0.9821 |
| CEU | TRIM49L1 | 89714064 | 2.0072 | 2.3879 | -0.4009 |
| CEU | TRIM49L1 | 89719064 | 3.3024 | 2.8996 | 0.3623  |
| CEU | TRIM49L1 | 89724064 | 2.8609 | 2.8996 | -0.0348 |
| CEU | TRIM49L1 | 89729064 | 4.5761 | 3.9229 | 0.4556  |
| CEU | TRIM49L1 | 89734064 | 4.9846 | 4.0935 | 0.5992  |
| CEU | TRIM49L1 | 89739064 | 4.0874 | 4.4346 | -0.2178 |
| CEU | TRIM49L1 | 89744064 | 4.6213 | 6.8225 | -0.9419 |
| CEU | TRIM49L1 | 89749064 | 3.9481 | 5.6286 | -0.8548 |
| CEU | TRIM49L1 | 89754064 | 2.9013 | 2.8996 | 0.0015  |
| CEU | TRIM49L1 | 89759064 | 1.7335 | 2.0467 | -0.3727 |
| CEU | TRIM49L1 | 89764064 | 2.4972 | 3.2407 | -0.6097 |
| CEU | TRIM49L1 | 89769064 | 5.7211 | 6.6519 | -0.4075 |
| CEU | TRIM49L1 | 89774064 | 5.9802 | 6.4814 | -0.2246 |
| CEU | TRIM49L1 | 89779064 | 4.0101 | 4.7757 | -0.4503 |
| CEU | TRIM49L1 | 89784064 | 3.6291 | 4.7757 | -0.6744 |
| CEU | TRIM49L1 | 89789064 | 2.9375 | 3.2407 | -0.2486 |
| CEU | TRIM49L1 | 89794064 | 3.194  | 3.9229 | -0.5084 |
| CEU | TRIM49L1 | 89799064 | 2.8343 | 4.4346 | -1.0041 |
| CEU | TRIM49L1 | 89804064 | 3.9994 | 5.1169 | -0.6186 |
| CEU | TRIM49L1 | 89809064 | 4.5372 | 5.458  | -0.4814 |
| CEU | TRIM49L1 | 89814064 | 5.1709 | 6.3108 | -0.5234 |
| CEU | TRIM49L1 | 89819064 | 8.3125 | 8.187  | 0.0455  |
| CEU | TRIM49L1 | 89824064 | 7.6339 | 6.8225 | 0.3472  |
| CEU | TRIM49L1 | 89829064 | 8.4836 | 7.8459 | 0.2402  |
| CEU | TRIM49L1 | 89834064 | 8.0957 | 6.9931 | 0.4613  |
| CEU | TRIM49L1 | 89839064 | 6.6308 | 5.7991 | 0.4119  |

## 2\_TajimasD\_data

|     |          |          |         |         |         |
|-----|----------|----------|---------|---------|---------|
| CEU | TRIM49L1 | 89844064 | 8.7941  | 7.1636  | 0.6674  |
| CEU | TRIM49L1 | 89849064 | 10.6129 | 8.5281  | 0.7274  |
| CEU | TRIM49L1 | 89854064 | 14.9827 | 10.5749 | 1.2594  |
| CEU | TRIM49L1 | 89859064 | 18.3799 | 11.5982 | 1.7769  |
| CEU | TRIM49L1 | 89864064 | 21.5694 | 12.2805 | 2.3062  |
| CEU | TRIM49L1 | 89869064 | 21.7104 | 12.1099 | 2.4152  |
| CEU | TRIM49L1 | 89874064 | 18.1909 | 11.7688 | 1.6597  |
| CEU | TRIM49L1 | 89879064 | 16.4834 | 10.7454 | 1.6151  |
| CEU | TRIM49L1 | 89884064 | 21.0273 | 13.1333 | 1.8394  |
| CEU | TRIM49L1 | 89889064 | 20.8636 | 12.1099 | 2.2022  |
| CEU | TRIM49L1 | 89894064 | 12.6092 | 7.8459  | 1.7944  |
| CEU | TRIM49L1 | 89899064 | 13.2331 | 11.4277 | 0.4797  |
| CEU | TRIM49L1 | 89904064 | 13.7543 | 12.6216 | 0.274   |
| CEU | TRIM49L1 | 89909064 | 12.4128 | 9.0398  | 1.1152  |
| CEU | TRIM49L1 | 89914064 | 17.3938 | 10.5749 | 1.9483  |
| CEU | TRIM49L1 | 89919064 | 19.9969 | 13.4744 | 1.4834  |
| CEU | TRIM49L1 | 89924064 | 18.2476 | 11.7688 | 1.6743  |
| CEU | TRIM49L1 | 89929064 | 18.5152 | 11.2571 | 1.9558  |
| CEU | TRIM49L1 | 89934064 | 15.9025 | 10.0632 | 1.7475  |
| CEU | TRIM49L1 | 89939064 | 14.8277 | 7.8459  | 2.6301  |
| CEU | TRIM49L1 | 89944064 | 16.7469 | 8.0164  | 3.2246  |
| CEU | TRIM49L1 | 89949064 | 16.2552 | 9.0398  | 2.3856  |
| CEU | TRIM49L1 | 89954064 | 15.1248 | 9.8926  | 1.5909  |
| CEU | TRIM49L1 | 89959064 | 12.5934 | 9.7221  | 0.8873  |
| CEU | TRIM49L1 | 89964064 | 9.1142  | 7.8459  | 0.4778  |
| CEU | TRIM49L1 | 89969064 | 7.196   | 7.1636  | 0.0133  |
| CEU | TRIM49L1 | 89974064 | 8.5848  | 8.6987  | -0.039  |
| CEU | TRIM49L1 | 89979064 | 6.8308  | 6.9931  | -0.0679 |
| CEU | TRIM49L1 | 89984064 | 5.6232  | 6.9931  | -0.5732 |
| CEU | TRIM49L1 | 89989064 | 8.8868  | 10.0632 | -0.3521 |
| CEU | TRIM49L1 | 89994064 | 8.7306  | 9.7221  | -0.3064 |
| CEU | TRIM49L1 | 89999064 | 6.4259  | 9.3809  | -0.944  |
| CEU | TRIM49L1 | 90004064 | 7.6436  | 12.6216 | -1.2044 |
| CEU | TRIM49L1 | 90009064 | 9.2791  | 11.0866 | -0.4941 |
| CEU | TRIM49L1 | 90014064 | 7.8182  | 7.3342  | 0.1939  |
| CEU | TRIM49L1 | 90019064 | 4.9588  | 7.1636  | -0.9025 |
| CEU | TRIM49L1 | 90024064 | 3.5873  | 6.8225  | -1.3843 |
| CEU | TRIM49L1 | 90029064 | 5.3779  | 6.8225  | -0.6181 |
| CEU | TRIM49L1 | 90034064 | 7.483   | 6.9931  | 0.205   |
| CEU | TRIM49L1 | 90039064 | 11.3408 | 9.2104  | 0.6923  |
| CEU | TRIM49L1 | 90044064 | 9.9994  | 8.0164  | 0.7324  |
| CEU | TRIM49L1 | 90049064 | 6.0734  | 5.458   | 0.3217  |
| CEU | TRIM49L1 | 90054064 | 7.2606  | 7.1636  | 0.0397  |
| CEU | TRIM49L1 | 90059064 | 5.8751  | 8.0164  | -0.7909 |
| CEU | TRIM49L1 | 90064064 | 4.1674  | 7.5047  | -1.3094 |
| CEU | TRIM49L1 | 90069064 | 6.2925  | 7.3342  | -0.4174 |
| CEU | TRIM49L1 | 90074064 | 6.7312  | 8.0164  | -0.4747 |
| CEU | TRIM49L1 | 90079064 | 8.8213  | 8.8692  | -0.0161 |
| CEU | TRIM49L1 | 90084064 | 11.1049 | 9.5515  | 0.488   |

## 2\_TajimasD\_data

|     |          |          |         |         |         |
|-----|----------|----------|---------|---------|---------|
| CEU | TRIM49L1 | 90089064 | 9.7687  | 9.2104  | 0.1814  |
| CEU | TRIM49L1 | 90094064 | 9.9347  | 9.2104  | 0.2354  |
| CEU | TRIM49L1 | 90099064 | 7.9891  | 8.6987  | -0.2431 |
| CEU | TRIM49L1 | 90104064 | 8.8402  | 9.8926  | -0.32   |
| CEU | TRIM49L1 | 90109064 | 8.764   | 10.7454 | -0.5577 |
| CEU | TRIM49L1 | 90114064 | 7.1472  | 8.3576  | -0.4303 |
| CEU | TRIM49L1 | 90119064 | 8.0311  | 8.5281  | -0.1734 |
| CEU | TRIM49L1 | 90124064 | 6.4589  | 8.3576  | -0.6749 |
| CEU | TRIM49L1 | 90129064 | 6.5096  | 8.3576  | -0.6569 |
| CEU | TRIM49L1 | 90134064 | 4.8433  | 5.7991  | -0.4734 |
| CEU | TRIM49L1 | 90139064 | 10.335  | 9.2104  | 0.3654  |
| CEU | TRIM49L1 | 90144064 | 14.2263 | 13.9861 | 0.0527  |
| CEU | TRIM49L1 | 90149064 | 11.22   | 10.4043 | 0.2366  |
| CEU | TRIM49L1 | 90154064 | 9.9526  | 9.3809  | 0.1826  |
| CEU | TRIM49L1 | 90159064 | 7.2525  | 8.5281  | -0.4451 |
| CEU | TRIM49L1 | 90164064 | 7.7541  | 8.3576  | -0.2145 |
| CEU | TRIM49L1 | 90169064 | 7.0045  | 9.3809  | -0.7592 |
| CEU | TRIM49L1 | 90174064 | 7.0361  | 10.5749 | -1.0111 |
| CEU | TRIM49L1 | 90179064 | 7.7774  | 11.4277 | -0.9698 |
| CEU | TRIM49L1 | 90184064 | 8.4966  | 10.5749 | -0.5938 |
| CEU | TRIM49L1 | 90189064 | 17.6399 | 13.4744 | 0.9473  |
| CEU | TRIM49L1 | 90194064 | 17.195  | 14.8389 | 0.4889  |
| CEU | TRIM49L1 | 90199064 | 10.8019 | 14.3272 | -0.7564 |
| CEU | TRIM49L1 | 90204064 | 10.0602 | 12.9627 | -0.6847 |
| CEU | TRIM49L1 | 90209064 | 10.6066 | 11.5982 | -0.2598 |
| CEU | TRIM49L1 | 90214064 | 12.864  | 12.7922 | 0.0172  |
| CEU | TRIM49L1 | 90219064 | 12.9557 | 15.0095 | -0.4216 |
| CEU | TRIM49L1 | 90224064 | 19.8505 | 17.7385 | 0.3695  |
| CEU | TRIM49L1 | 90229064 | 28.4411 | 17.3974 | 1.9686  |
| CEU | TRIM49L1 | 90234064 | 31.6819 | 18.5913 | 2.1894  |
| CEU | TRIM49L1 | 90239064 | 31.8083 | 18.0796 | 2.3585  |
| CEU | TRIM49L1 | 90244064 | 22.187  | 12.6216 | 2.3142  |
| CEU | TRIM49L1 | 90249064 | 15.235  | 10.916  | 1.1979  |
| CEU | TRIM49L1 | 90254064 | 13.4947 | 10.4043 | 0.8965  |
| CEU | TRIM49L1 | 90259064 | 9.5624  | 8.8692  | 0.2333  |
| CEU | TRIM49L1 | 90264064 | 6.583   | 7.3342  | -0.301  |
| CEU | TRIM49L1 | 90269064 | 5.7248  | 6.6519  | -0.4059 |
| CEU | TRIM49L1 | 90274064 | 10.859  | 9.0398  | 0.6015  |
| CEU | TRIM49L1 | 90279064 | 12.308  | 10.5749 | 0.4952  |
| CEU | TRIM49L1 | 90284064 | 7.7792  | 9.3809  | -0.5117 |
| CEU | TRIM49L1 | 90289064 | 6.362   | 7.1636  | -0.3281 |
| CEU | TRIM49L1 | 90294064 | 12.3923 | 10.2337 | 0.6359  |
| CEU | TRIM49L1 | 90299064 | 16.6141 | 11.9394 | 1.1918  |
| CEU | TRIM49L1 | 90304064 | 16.5141 | 9.7221  | 2.0989  |
| CEU | TRIM49L1 | 90309064 | 18.3006 | 9.5515  | 2.7486  |
| CEU | TRIM49L1 | 90314064 | 18.9163 | 10.5749 | 2.3833  |
| CEU | TRIM49L1 | 90319064 | 13.3764 | 8.8692  | 1.5167  |
| CEU | TRIM49L1 | 90324064 | 12.8075 | 8.6987  | 1.4077  |
| CEU | TRIM49L1 | 90329064 | 18.0186 | 11.5982 | 1.6822  |

## 2\_TajimasD\_data

|     |          |          |         |         |         |
|-----|----------|----------|---------|---------|---------|
| CEU | TRIM49L1 | 90334064 | 15.0812 | 10.4043 | 1.3567  |
| CEU | TRIM49L1 | 90339064 | 12.4207 | 8.8692  | 1.1951  |
| CEU | TRIM49L1 | 90344064 | 16.3127 | 9.5515  | 2.1241  |
| CEU | TRIM49L1 | 90349064 | 17.905  | 10.5749 | 2.0943  |
| CEU | TRIM49L1 | 90354064 | 18.2915 | 11.2571 | 1.8955  |
| CEU | TRIM49L1 | 90359064 | 18.4059 | 10.5749 | 2.2375  |
| CEU | TRIM49L1 | 90364064 | 15.2614 | 9.7221  | 1.7118  |
| CEU | TRIM49L1 | 90369064 | 18.7067 | 12.2805 | 1.5955  |
| CEU | TRIM49L1 | 90374064 | 24.8508 | 14.8389 | 2.0776  |
| CEU | TRIM49L1 | 90379064 | 22.4343 | 14.4978 | 1.6838  |
| CEU | TRIM49L1 | 90384064 | 15.5747 | 11.0866 | 1.2268  |
| CEU | TRIM49L1 | 90389064 | 9.0128  | 6.3108  | 1.2405  |
| CEU | TRIM49L1 | 90394064 | 8.6926  | 5.6286  | 1.5585  |
| CEU | TRIM49L1 | 90399064 | 8.9474  | 6.8225  | 0.9092  |
| CEU | TRIM49L1 | 90404064 | 10.5236 | 9.2104  | 0.4267  |
| CEU | TRIM49L1 | 90409064 | 20.8392 | 12.4511 | 2.0556  |
| CEU | TRIM49L1 | 90414064 | 22.5242 | 12.4511 | 2.4686  |
| CEU | TRIM49L1 | 90419064 | 24.2791 | 14.6684 | 2.0164  |
| CEU | TRIM49L1 | 90424064 | 25.3998 | 15.1801 | 2.0753  |
| CHB | TRIM49L1 | 89429064 | 6.9914  | 6.946   | 0.0191  |
| CHB | TRIM49L1 | 89434064 | 3.0543  | 5.7601  | -1.3443 |
| CHB | TRIM49L1 | 89439064 | 7.9478  | 8.3013  | -0.1261 |
| CHB | TRIM49L1 | 89444064 | 11.3996 | 9.4872  | 0.6028  |
| CHB | TRIM49L1 | 89449064 | 10.8605 | 8.3013  | 0.9127  |
| CHB | TRIM49L1 | 89454064 | 11.0889 | 8.4708  | 0.9165  |
| CHB | TRIM49L1 | 89459064 | 18.8256 | 12.0285 | 1.7159  |
| CHB | TRIM49L1 | 89464064 | 15.561  | 10.1649 | 1.5952  |
| CHB | TRIM49L1 | 89469064 | 5.1386  | 6.6072  | -0.645  |
| CHB | TRIM49L1 | 89474064 | 4.7944  | 6.0989  | -0.6158 |
| CHB | TRIM49L1 | 89479064 | 4.4078  | 5.4213  | -0.5314 |
| CHB | TRIM49L1 | 89484064 | 7.3609  | 7.4543  | -0.0368 |
| CHB | TRIM49L1 | 89489064 | 8.8391  | 7.7931  | 0.3953  |
| CHB | TRIM49L1 | 89494064 | 4.1689  | 4.913   | -0.4256 |
| CHB | TRIM49L1 | 89499064 | 4.4622  | 5.5907  | -0.5758 |
| CHB | TRIM49L1 | 89504064 | 5.3714  | 5.0825  | 0.1604  |
| CHB | TRIM49L1 | 89509064 | 3.3769  | 3.3883  | -0.009  |
| CHB | TRIM49L1 | 89514064 | 3.2507  | 3.8965  | -0.4517 |
| CHB | TRIM49L1 | 89519064 | 4.4932  | 4.2354  | 0.1678  |
| CHB | TRIM49L1 | 89524064 | 5.1515  | 5.7601  | -0.3024 |
| CHB | TRIM49L1 | 89529064 | 4.4902  | 6.4378  | -0.8757 |
| CHB | TRIM49L1 | 89534064 | 4.2798  | 6.0989  | -0.8587 |
| CHB | TRIM49L1 | 89539064 | 4.4721  | 6.0989  | -0.7679 |
| CHB | TRIM49L1 | 89544064 | 8.1475  | 9.1484  | -0.3263 |
| CHB | TRIM49L1 | 89549064 | 7.1531  | 8.3013  | -0.4095 |
| CHB | TRIM49L1 | 89554064 | 2.3413  | 3.2189  | -0.7215 |
| CHB | TRIM49L1 | 89559064 | 2.0232  | 2.033   | -0.0117 |
| CHB | TRIM49L1 | 89564064 | 2.6341  | 2.8801  | -0.2218 |
| CHB | TRIM49L1 | 89569064 | 1.9682  | 3.3883  | -1.1184 |
| CHB | TRIM49L1 | 89574064 | 1.3362  | 2.2024  | -0.9699 |

## 2\_TajimasD\_data

|     |          |          |        |        |         |
|-----|----------|----------|--------|--------|---------|
| CHB | TRIM49L1 | 89579064 | 1.3758 | 1.0165 | 0.715   |
| CHB | TRIM49L1 | 89584064 | 0.8926 | 0.5082 | 1.2067  |
| CHB | TRIM49L1 | 89589064 | 1.5856 | 1.0165 | 1.1325  |
| CHB | TRIM49L1 | 89594064 | 1.2564 | 2.3718 | -1.1774 |
| CHB | TRIM49L1 | 89599064 | 0.6773 | 2.7106 | -1.9267 |
| CHB | TRIM49L1 | 89604064 | 1.7935 | 3.8965 | -1.4709 |
| CHB | TRIM49L1 | 89609064 | 2.8083 | 4.4048 | -1.0046 |
| CHB | TRIM49L1 | 89614064 | 1.9417 | 2.2024 | -0.2919 |
| CHB | TRIM49L1 | 89619064 | 1.3807 | 1.5247 | -0.2139 |
| CHB | TRIM49L1 | 89624064 | 1.253  | 1.8636 | -0.779  |
| CHB | TRIM49L1 | 89629064 | 1.3672 | 2.7106 | -1.2729 |
| CHB | TRIM49L1 | 89634064 | 1.1934 | 2.033  | -1.0012 |
| CHB | TRIM49L1 | 89639064 | 1.4133 | 1.8636 | -0.5745 |
| CHB | TRIM49L1 | 89644064 | 2.1504 | 2.5412 | -0.3902 |
| CHB | TRIM49L1 | 89649064 | 1.5146 | 2.033  | -0.6182 |
| CHB | TRIM49L1 | 89654064 | 4.3259 | 5.5907 | -0.6453 |
| CHB | TRIM49L1 | 89659064 | 3.6895 | 4.5742 | -0.5387 |
| CHB | TRIM49L1 | 89664064 | 0.0289 | 0.1694 | -0.8349 |
| CHB | TRIM49L1 | 89669064 | 0.0775 | 1.0165 | -1.8687 |
| CHB | TRIM49L1 | 89674064 | 0.1352 | 1.3553 | -1.9774 |
| CHB | TRIM49L1 | 89679064 | 0.9747 | 1.1859 | -0.377  |
| CHB | TRIM49L1 | 89684064 | 0.8881 | 0.6777 | 0.55    |
| CHB | TRIM49L1 | 89689064 | 0.0289 | 0.1694 | -0.8349 |
| CHB | TRIM49L1 | 89694064 | 0.2029 | 0.3388 | -0.5451 |
| CHB | TRIM49L1 | 89699064 | 0.4894 | 0.6777 | -0.4923 |
| CHB | TRIM49L1 | 89704064 | 0.5601 | 2.033  | -1.7564 |
| CHB | TRIM49L1 | 89709064 | 0.8344 | 2.3718 | -1.6228 |
| CHB | TRIM49L1 | 89714064 | 2.2777 | 2.5412 | -0.2631 |
| CHB | TRIM49L1 | 89719064 | 2.9655 | 3.2189 | -0.2083 |
| CHB | TRIM49L1 | 89724064 | 2.3263 | 3.0495 | -0.622  |
| CHB | TRIM49L1 | 89729064 | 4.7521 | 4.913  | -0.092  |
| CHB | TRIM49L1 | 89734064 | 5.2361 | 4.2354 | 0.6515  |
| CHB | TRIM49L1 | 89739064 | 3.1201 | 4.066  | -0.6379 |
| CHB | TRIM49L1 | 89744064 | 3.0133 | 7.4543 | -1.7481 |
| CHB | TRIM49L1 | 89749064 | 4.0653 | 5.9295 | -0.9025 |
| CHB | TRIM49L1 | 89754064 | 3.68   | 3.3883 | 0.2297  |
| CHB | TRIM49L1 | 89759064 | 1.8471 | 3.8965 | -1.4334 |
| CHB | TRIM49L1 | 89764064 | 2.921  | 5.5907 | -1.3621 |
| CHB | TRIM49L1 | 89769064 | 5.3851 | 7.4543 | -0.8145 |
| CHB | TRIM49L1 | 89774064 | 4.9893 | 6.946  | -0.8213 |
| CHB | TRIM49L1 | 89779064 | 2.0598 | 5.7601 | -1.8384 |
| CHB | TRIM49L1 | 89784064 | 2.4369 | 5.4213 | -1.5649 |
| CHB | TRIM49L1 | 89789064 | 3.8662 | 4.066  | -0.1347 |
| CHB | TRIM49L1 | 89794064 | 3.3598 | 5.4213 | -1.081  |
| CHB | TRIM49L1 | 89799064 | 2.861  | 6.0989 | -1.5284 |
| CHB | TRIM49L1 | 89804064 | 4.9256 | 5.9295 | -0.486  |
| CHB | TRIM49L1 | 89809064 | 4.6337 | 6.0989 | -0.6916 |
| CHB | TRIM49L1 | 89814064 | 3.783  | 5.5907 | -0.9223 |
| CHB | TRIM49L1 | 89819064 | 5.8195 | 6.7766 | -0.4108 |

## 2\_TajimasD\_data

|     |          |          |         |         |         |
|-----|----------|----------|---------|---------|---------|
| CHB | TRIM49L1 | 89824064 | 6.3107  | 6.4378  | -0.0571 |
| CHB | TRIM49L1 | 89829064 | 9.4042  | 8.8096  | 0.2008  |
| CHB | TRIM49L1 | 89834064 | 8.8068  | 8.6402  | 0.0573  |
| CHB | TRIM49L1 | 89839064 | 7.3468  | 7.6237  | -0.1068 |
| CHB | TRIM49L1 | 89844064 | 9.6313  | 10.8426 | -0.3371 |
| CHB | TRIM49L1 | 89849064 | 10.4441 | 13.3838 | -0.6709 |
| CHB | TRIM49L1 | 89854064 | 14.6722 | 14.0615 | 0.133   |
| CHB | TRIM49L1 | 89859064 | 18.4972 | 13.7226 | 1.0642  |
| CHB | TRIM49L1 | 89864064 | 21.6623 | 13.892  | 1.7118  |
| CHB | TRIM49L1 | 89869064 | 22.3836 | 15.2474 | 1.4389  |
| CHB | TRIM49L1 | 89874064 | 19.3573 | 14.5697 | 1.008   |
| CHB | TRIM49L1 | 89879064 | 17.1843 | 11.012  | 1.693   |
| CHB | TRIM49L1 | 89884064 | 21.3502 | 14.7391 | 1.3768  |
| CHB | TRIM49L1 | 89889064 | 21.4216 | 15.0779 | 1.2928  |
| CHB | TRIM49L1 | 89894064 | 13.2482 | 10.5037 | 0.7868  |
| CHB | TRIM49L1 | 89899064 | 12.9069 | 13.3838 | -0.1088 |
| CHB | TRIM49L1 | 89904064 | 12.248  | 13.892  | -0.3622 |
| CHB | TRIM49L1 | 89909064 | 12.1815 | 11.012  | 0.3208  |
| CHB | TRIM49L1 | 89914064 | 18.273  | 12.8755 | 1.2778  |
| CHB | TRIM49L1 | 89919064 | 18.3132 | 13.7226 | 1.0231  |
| CHB | TRIM49L1 | 89924064 | 15.3964 | 12.0285 | 0.8502  |
| CHB | TRIM49L1 | 89929064 | 16.0251 | 11.6896 | 1.1243  |
| CHB | TRIM49L1 | 89934064 | 13.7817 | 10.5037 | 0.9398  |
| CHB | TRIM49L1 | 89939064 | 13.4525 | 9.9955  | 1.0381  |
| CHB | TRIM49L1 | 89944064 | 14.8755 | 10.5037 | 1.2534  |
| CHB | TRIM49L1 | 89949064 | 14.3571 | 10.1649 | 1.2393  |
| CHB | TRIM49L1 | 89954064 | 13.7464 | 11.8591 | 0.4829  |
| CHB | TRIM49L1 | 89959064 | 9.1163  | 13.045  | -0.9187 |
| CHB | TRIM49L1 | 89964064 | 4.451   | 11.1814 | -1.8198 |
| CHB | TRIM49L1 | 89969064 | 6.3722  | 9.6567  | -1.0185 |
| CHB | TRIM49L1 | 89974064 | 10.561  | 10.8426 | -0.0784 |
| CHB | TRIM49L1 | 89979064 | 8.5907  | 8.979   | -0.1288 |
| CHB | TRIM49L1 | 89984064 | 6.1631  | 7.1154  | -0.3911 |
| CHB | TRIM49L1 | 89989064 | 10.815  | 9.9955  | 0.2461  |
| CHB | TRIM49L1 | 89994064 | 12.6804 | 10.5037 | 0.6241  |
| CHB | TRIM49L1 | 89999064 | 10.0343 | 10.5037 | -0.1346 |
| CHB | TRIM49L1 | 90004064 | 12.362  | 13.5532 | -0.2686 |
| CHB | TRIM49L1 | 90009064 | 13.7545 | 12.3673 | 0.3411  |
| CHB | TRIM49L1 | 90014064 | 9.4881  | 9.4872  | 0.0003  |
| CHB | TRIM49L1 | 90019064 | 6.0761  | 8.1319  | -0.7472 |
| CHB | TRIM49L1 | 90024064 | 5.1234  | 6.0989  | -0.4605 |
| CHB | TRIM49L1 | 90029064 | 5.695   | 5.7601  | -0.0323 |
| CHB | TRIM49L1 | 90034064 | 7.4743  | 7.6237  | -0.0576 |
| CHB | TRIM49L1 | 90039064 | 11.2034 | 13.5532 | -0.5299 |
| CHB | TRIM49L1 | 90044064 | 8.7927  | 11.5202 | -0.7171 |
| CHB | TRIM49L1 | 90049064 | 4.0735  | 5.9295  | -0.8985 |
| CHB | TRIM49L1 | 90054064 | 5.055   | 7.2848  | -0.8963 |
| CHB | TRIM49L1 | 90059064 | 4.4232  | 7.6237  | -1.2342 |
| CHB | TRIM49L1 | 90064064 | 3.3381  | 7.1154  | -1.5512 |

## 2\_TajimasD\_data

|     |          |          |         |         |         |
|-----|----------|----------|---------|---------|---------|
| CHB | TRIM49L1 | 90069064 | 4.4889  | 7.4543  | -1.1673 |
| CHB | TRIM49L1 | 90074064 | 5.5492  | 8.4708  | -1.0228 |
| CHB | TRIM49L1 | 90079064 | 8.3356  | 9.6567  | -0.4096 |
| CHB | TRIM49L1 | 90084064 | 9.5795  | 9.3178  | 0.0839  |
| CHB | TRIM49L1 | 90089064 | 8.8725  | 10.3343 | -0.4255 |
| CHB | TRIM49L1 | 90094064 | 11.8962 | 11.1814 | 0.1933  |
| CHB | TRIM49L1 | 90099064 | 11.2064 | 7.6237  | 1.3816  |
| CHB | TRIM49L1 | 90104064 | 10.5979 | 8.1319  | 0.8963  |
| CHB | TRIM49L1 | 90109064 | 10.0143 | 9.3178  | 0.2233  |
| CHB | TRIM49L1 | 90114064 | 6.6172  | 7.2848  | -0.2684 |
| CHB | TRIM49L1 | 90119064 | 6.7531  | 7.4543  | -0.276  |
| CHB | TRIM49L1 | 90124064 | 7.0859  | 7.6237  | -0.2074 |
| CHB | TRIM49L1 | 90129064 | 8.6324  | 7.4543  | 0.4637  |
| CHB | TRIM49L1 | 90134064 | 6.0779  | 4.2354  | 1.1995  |
| CHB | TRIM49L1 | 90139064 | 8.7243  | 6.4378  | 1.0281  |
| CHB | TRIM49L1 | 90144064 | 12.5203 | 9.6567  | 0.8879  |
| CHB | TRIM49L1 | 90149064 | 10.942  | 8.3013  | 0.9418  |
| CHB | TRIM49L1 | 90154064 | 10.7201 | 8.6402  | 0.7149  |
| CHB | TRIM49L1 | 90159064 | 8.0516  | 6.946   | 0.4641  |
| CHB | TRIM49L1 | 90164064 | 8.2212  | 6.7766  | 0.6201  |
| CHB | TRIM49L1 | 90169064 | 7.4013  | 6.946   | 0.1911  |
| CHB | TRIM49L1 | 90174064 | 6.5776  | 6.946   | -0.1546 |
| CHB | TRIM49L1 | 90179064 | 8.1628  | 7.4543  | 0.2789  |
| CHB | TRIM49L1 | 90184064 | 9.6128  | 7.7931  | 0.6878  |
| CHB | TRIM49L1 | 90189064 | 15.6587 | 11.1814 | 1.2106  |
| CHB | TRIM49L1 | 90194064 | 17.9564 | 12.3673 | 1.3745  |
| CHB | TRIM49L1 | 90199064 | 18.4457 | 12.5367 | 1.4346  |
| CHB | TRIM49L1 | 90204064 | 18.047  | 12.0285 | 1.5194  |
| CHB | TRIM49L1 | 90209064 | 16.1007 | 12.1979 | 0.9724  |
| CHB | TRIM49L1 | 90214064 | 14.6097 | 12.5367 | 0.5033  |
| CHB | TRIM49L1 | 90219064 | 12.9585 | 10.1649 | 0.8258  |
| CHB | TRIM49L1 | 90224064 | 24.745  | 13.892  | 2.3909  |
| CHB | TRIM49L1 | 90229064 | 34.8516 | 17.2803 | 3.1435  |
| CHB | TRIM49L1 | 90234064 | 36.5319 | 16.9415 | 3.5718  |
| CHB | TRIM49L1 | 90239064 | 32.8504 | 15.925  | 3.274   |
| CHB | TRIM49L1 | 90244064 | 21.8159 | 13.7226 | 1.8038  |
| CHB | TRIM49L1 | 90249064 | 16.9159 | 12.0285 | 1.2338  |
| CHB | TRIM49L1 | 90254064 | 13.5743 | 9.9955  | 1.0746  |
| CHB | TRIM49L1 | 90259064 | 10.7704 | 7.6237  | 1.2135  |
| CHB | TRIM49L1 | 90264064 | 9.4841  | 6.6072  | 1.2636  |
| CHB | TRIM49L1 | 90269064 | 8.7434  | 6.4378  | 1.0367  |
| CHB | TRIM49L1 | 90274064 | 14.7304 | 7.7931  | 2.6219  |
| CHB | TRIM49L1 | 90279064 | 18.155  | 8.979   | 3.044   |
| CHB | TRIM49L1 | 90284064 | 12.6916 | 7.1154  | 2.29    |
| CHB | TRIM49L1 | 90289064 | 7.8947  | 6.7766  | 0.48    |
| CHB | TRIM49L1 | 90294064 | 15.5041 | 10.5037 | 1.4336  |
| CHB | TRIM49L1 | 90299064 | 19.9166 | 12.0285 | 1.9913  |
| CHB | TRIM49L1 | 90304064 | 16.941  | 10.6731 | 1.7703  |
| CHB | TRIM49L1 | 90309064 | 17.6292 | 10.8426 | 1.8887  |



## 2\_TajimasD\_data

|     |          |          |         |         |         |
|-----|----------|----------|---------|---------|---------|
| CHB | TRIM49L1 | 90314064 | 18.6678 | 11.1814 | 2.0243  |
| CHB | TRIM49L1 | 90319064 | 13.657  | 8.979   | 1.5518  |
| CHB | TRIM49L1 | 90324064 | 12.352  | 8.6402  | 1.2759  |
| CHB | TRIM49L1 | 90329064 | 17.2964 | 9.8261  | 2.2792  |
| CHB | TRIM49L1 | 90334064 | 14.0308 | 8.1319  | 2.1441  |
| CHB | TRIM49L1 | 90339064 | 12.8087 | 8.6402  | 1.4329  |
| CHB | TRIM49L1 | 90344064 | 16.016  | 10.8426 | 1.4398  |
| CHB | TRIM49L1 | 90349064 | 16.3436 | 10.1649 | 1.8265  |
| CHB | TRIM49L1 | 90354064 | 18.7697 | 12.7061 | 1.4536  |
| CHB | TRIM49L1 | 90359064 | 17.8174 | 12.8755 | 1.17    |
| CHB | TRIM49L1 | 90364064 | 13.0636 | 8.979   | 1.355   |
| CHB | TRIM49L1 | 90369064 | 17.2144 | 12.7061 | 1.0808  |
| CHB | TRIM49L1 | 90374064 | 23.0069 | 17.7886 | 0.9079  |
| CHB | TRIM49L1 | 90379064 | 16.4567 | 16.6027 | -0.0271 |
| CHB | TRIM49L1 | 90384064 | 9.8754  | 12.3673 | -0.6128 |
| CHB | TRIM49L1 | 90389064 | 8.1271  | 10.8426 | -0.7557 |
| CHB | TRIM49L1 | 90394064 | 8.3341  | 10.1649 | -0.5412 |
| CHB | TRIM49L1 | 90399064 | 8.1609  | 8.8096  | -0.219  |
| CHB | TRIM49L1 | 90404064 | 9.2008  | 9.9955  | -0.2386 |
| CHB | TRIM49L1 | 90409064 | 18.5366 | 13.2144 | 1.2294  |
| CHB | TRIM49L1 | 90414064 | 20.2758 | 13.2144 | 1.6311  |
| CHB | TRIM49L1 | 90419064 | 21.5274 | 16.2638 | 0.9979  |
| CHB | TRIM49L1 | 90424064 | 22.467  | 17.7886 | 0.814   |
| YRI | TRIM49L1 | 89429064 | 5.7858  | 11.9324 | -1.5582 |
| YRI | TRIM49L1 | 89434064 | 3.1456  | 9.4115  | -1.9831 |
| YRI | TRIM49L1 | 89439064 | 5.6645  | 10.2518 | -1.3407 |
| YRI | TRIM49L1 | 89444064 | 7.6945  | 11.0921 | -0.9225 |
| YRI | TRIM49L1 | 89449064 | 7.406   | 10.5879 | -0.9024 |
| YRI | TRIM49L1 | 89454064 | 7.4736  | 11.4282 | -1.044  |
| YRI | TRIM49L1 | 89459064 | 12.5994 | 14.9575 | -0.4826 |
| YRI | TRIM49L1 | 89464064 | 13.0523 | 16.6382 | -0.663  |
| YRI | TRIM49L1 | 89469064 | 9.1552  | 15.9659 | -1.3098 |
| YRI | TRIM49L1 | 89474064 | 7.8371  | 14.1172 | -1.3579 |
| YRI | TRIM49L1 | 89479064 | 6.7119  | 9.0754  | -0.7737 |
| YRI | TRIM49L1 | 89484064 | 10.7881 | 9.0754  | 0.5606  |
| YRI | TRIM49L1 | 89489064 | 10.8833 | 10.2518 | 0.1846  |
| YRI | TRIM49L1 | 89494064 | 5.7546  | 8.235   | -0.8881 |
| YRI | TRIM49L1 | 89499064 | 5.7008  | 9.2434  | -1.1401 |
| YRI | TRIM49L1 | 89504064 | 4.9452  | 7.2267  | -0.9206 |
| YRI | TRIM49L1 | 89509064 | 2.8417  | 4.8738  | -1.1665 |
| YRI | TRIM49L1 | 89514064 | 3.5963  | 7.0586  | -1.4273 |
| YRI | TRIM49L1 | 89519064 | 4.3024  | 7.0586  | -1.1362 |
| YRI | TRIM49L1 | 89524064 | 5.3121  | 7.7309  | -0.9178 |
| YRI | TRIM49L1 | 89529064 | 5.6266  | 8.5712  | -1.0162 |
| YRI | TRIM49L1 | 89534064 | 5.8216  | 8.067   | -0.8194 |
| YRI | TRIM49L1 | 89539064 | 5.7062  | 8.5712  | -0.9887 |
| YRI | TRIM49L1 | 89544064 | 7.2111  | 13.9492 | -1.4736 |
| YRI | TRIM49L1 | 89549064 | 6.3057  | 12.2685 | -1.4725 |
| YRI | TRIM49L1 | 89554064 | 2.2517  | 3.5293  | -0.9687 |

## 2\_TajimasD\_data

|     |          |          |        |        |         |
|-----|----------|----------|--------|--------|---------|
| YRI | TRIM49L1 | 89559064 | 1.8035 | 3.1932 | -1.1461 |
| YRI | TRIM49L1 | 89564064 | 2.2259 | 4.7057 | -1.4679 |
| YRI | TRIM49L1 | 89569064 | 1.352  | 3.8654 | -1.7638 |
| YRI | TRIM49L1 | 89574064 | 0.8599 | 2.3529 | -1.5804 |
| YRI | TRIM49L1 | 89579064 | 0.897  | 1.3445 | -0.7268 |
| YRI | TRIM49L1 | 89584064 | 0.4136 | 0.6722 | -0.677  |
| YRI | TRIM49L1 | 89589064 | 1.1729 | 1.0084 | 0.328   |
| YRI | TRIM49L1 | 89594064 | 2.0377 | 2.8571 | -0.741  |
| YRI | TRIM49L1 | 89599064 | 1.3864 | 3.3612 | -1.5602 |
| YRI | TRIM49L1 | 89604064 | 2.4444 | 5.2099 | -1.4969 |
| YRI | TRIM49L1 | 89609064 | 3.6446 | 6.5544 | -1.2829 |
| YRI | TRIM49L1 | 89614064 | 2.4395 | 4.7057 | -1.3415 |
| YRI | TRIM49L1 | 89619064 | 1.9579 | 3.3612 | -1.1087 |
| YRI | TRIM49L1 | 89624064 | 2.013  | 2.5209 | -0.5086 |
| YRI | TRIM49L1 | 89629064 | 1.8703 | 3.3612 | -1.1779 |
| YRI | TRIM49L1 | 89634064 | 1.5133 | 2.8571 | -1.2153 |
| YRI | TRIM49L1 | 89639064 | 2.6954 | 2.8571 | -0.1462 |
| YRI | TRIM49L1 | 89644064 | 3.2242 | 3.5293 | -0.2313 |
| YRI | TRIM49L1 | 89649064 | 1.2859 | 2.3529 | -1.1295 |
| YRI | TRIM49L1 | 89654064 | 3.0597 | 7.0586 | -1.6485 |
| YRI | TRIM49L1 | 89659064 | 2.8238 | 6.0502 | -1.5287 |
| YRI | TRIM49L1 | 89664064 | 0.0638 | 0.3361 | -1.0932 |
| YRI | TRIM49L1 | 89669064 | 0.1461 | 0.8403 | -1.568  |
| YRI | TRIM49L1 | 89674064 | 0.4921 | 1.5126 | -1.5196 |
| YRI | TRIM49L1 | 89679064 | 1.2734 | 2.1848 | -1.0233 |
| YRI | TRIM49L1 | 89684064 | 0.8635 | 1.1764 | -0.5596 |
| YRI | TRIM49L1 | 89689064 | 0.2925 | 0.1681 | 0.7395  |
| YRI | TRIM49L1 | 89694064 | 0.7121 | 2.1848 | -1.6535 |
| YRI | TRIM49L1 | 89699064 | 0.8454 | 2.5209 | -1.6779 |
| YRI | TRIM49L1 | 89704064 | 2.346  | 2.5209 | -0.1752 |
| YRI | TRIM49L1 | 89709064 | 2.812  | 3.0251 | -0.1838 |
| YRI | TRIM49L1 | 89714064 | 2.2448 | 2.5209 | -0.2765 |
| YRI | TRIM49L1 | 89719064 | 2.8244 | 3.6974 | -0.6363 |
| YRI | TRIM49L1 | 89724064 | 2.8974 | 3.6974 | -0.5831 |
| YRI | TRIM49L1 | 89729064 | 6.2213 | 4.7057 | 0.8972  |
| YRI | TRIM49L1 | 89734064 | 6.5261 | 5.2099 | 0.7124  |
| YRI | TRIM49L1 | 89739064 | 3.7374 | 5.0419 | -0.7268 |
| YRI | TRIM49L1 | 89744064 | 3.4334 | 6.2183 | -1.2874 |
| YRI | TRIM49L1 | 89749064 | 3.0045 | 6.0502 | -1.4431 |
| YRI | TRIM49L1 | 89754064 | 2.528  | 5.2099 | -1.4517 |
| YRI | TRIM49L1 | 89759064 | 3.5231 | 4.2016 | -0.4432 |
| YRI | TRIM49L1 | 89764064 | 5.6379 | 5.8822 | -0.1187 |
| YRI | TRIM49L1 | 89769064 | 8.7074 | 9.4115 | -0.2228 |
| YRI | TRIM49L1 | 89774064 | 8.4526 | 8.5712 | -0.0409 |
| YRI | TRIM49L1 | 89779064 | 4.3937 | 7.3947 | -1.1859 |
| YRI | TRIM49L1 | 89784064 | 2.8682 | 7.7309 | -1.845  |
| YRI | TRIM49L1 | 89789064 | 2.0168 | 5.0419 | -1.6855 |
| YRI | TRIM49L1 | 89794064 | 2.9254 | 4.8738 | -1.1184 |
| YRI | TRIM49L1 | 89799064 | 4.6106 | 7.5628 | -1.1429 |

## 2\_TajimasD\_data

|     |          |          |         |         |         |
|-----|----------|----------|---------|---------|---------|
| YRI | TRIM49L1 | 89804064 | 7.2873  | 11.5963 | -1.1221 |
| YRI | TRIM49L1 | 89809064 | 6.5065  | 10.4199 | -1.1265 |
| YRI | TRIM49L1 | 89814064 | 6.5048  | 7.2267  | -0.2913 |
| YRI | TRIM49L1 | 89819064 | 11.511  | 8.235   | 1.173   |
| YRI | TRIM49L1 | 89824064 | 9.6663  | 7.7309  | 0.7343  |
| YRI | TRIM49L1 | 89829064 | 9.7355  | 11.9324 | -0.5569 |
| YRI | TRIM49L1 | 89834064 | 9.96    | 13.2769 | -0.7602 |
| YRI | TRIM49L1 | 89839064 | 9.6216  | 13.1089 | -0.8089 |
| YRI | TRIM49L1 | 89844064 | 13.7137 | 16.134  | -0.4608 |
| YRI | TRIM49L1 | 89849064 | 14.607  | 17.6465 | -0.5311 |
| YRI | TRIM49L1 | 89854064 | 16.5691 | 18.6549 | -0.3455 |
| YRI | TRIM49L1 | 89859064 | 19.0784 | 18.6549 | 0.0702  |
| YRI | TRIM49L1 | 89864064 | 21.2159 | 18.4868 | 0.4561  |
| YRI | TRIM49L1 | 89869064 | 21.0626 | 18.4868 | 0.4305  |
| YRI | TRIM49L1 | 89874064 | 17.9414 | 18.4868 | -0.0911 |
| YRI | TRIM49L1 | 89879064 | 16.3889 | 16.9743 | -0.1062 |
| YRI | TRIM49L1 | 89884064 | 25.5063 | 22.8565 | 0.3609  |
| YRI | TRIM49L1 | 89889064 | 26.9099 | 23.8648 | 0.3977  |
| YRI | TRIM49L1 | 89894064 | 14.5005 | 16.302  | -0.3396 |
| YRI | TRIM49L1 | 89899064 | 16.2985 | 19.8313 | -0.5518 |
| YRI | TRIM49L1 | 89904064 | 18.6495 | 22.1842 | -0.4955 |
| YRI | TRIM49L1 | 89909064 | 15.3326 | 19.4952 | -0.661  |
| YRI | TRIM49L1 | 89914064 | 20.9371 | 21.8481 | -0.1296 |
| YRI | TRIM49L1 | 89919064 | 20.012  | 19.4952 | 0.0821  |
| YRI | TRIM49L1 | 89924064 | 14.4808 | 14.4534 | 0.0058  |
| YRI | TRIM49L1 | 89929064 | 15.9708 | 14.4534 | 0.3208  |
| YRI | TRIM49L1 | 89934064 | 14.0838 | 13.613  | 0.1054  |
| YRI | TRIM49L1 | 89939064 | 14.1533 | 16.6382 | -0.4594 |
| YRI | TRIM49L1 | 89944064 | 16.1899 | 16.6382 | -0.0829 |
| YRI | TRIM49L1 | 89949064 | 13.9736 | 14.2853 | -0.0666 |
| YRI | TRIM49L1 | 89954064 | 12.9574 | 16.4701 | -0.6558 |
| YRI | TRIM49L1 | 89959064 | 13.4553 | 14.6214 | -0.2439 |
| YRI | TRIM49L1 | 89964064 | 9.4384  | 12.4366 | -0.731  |
| YRI | TRIM49L1 | 89969064 | 6.7817  | 13.7811 | -1.5485 |
| YRI | TRIM49L1 | 89974064 | 11.0894 | 16.9743 | -1.0674 |
| YRI | TRIM49L1 | 89979064 | 9.035   | 14.1172 | -1.0989 |
| YRI | TRIM49L1 | 89984064 | 6.4107  | 12.2685 | -1.4466 |
| YRI | TRIM49L1 | 89989064 | 11.3425 | 15.6298 | -0.8414 |
| YRI | TRIM49L1 | 89994064 | 9.8634  | 15.7978 | -1.1528 |
| YRI | TRIM49L1 | 89999064 | 6.5562  | 15.9659 | -1.8096 |
| YRI | TRIM49L1 | 90004064 | 9.8392  | 18.6549 | -1.4605 |
| YRI | TRIM49L1 | 90009064 | 11.5108 | 18.991  | -1.2181 |
| YRI | TRIM49L1 | 90014064 | 9.4826  | 15.7978 | -1.2268 |
| YRI | TRIM49L1 | 90019064 | 6.6455  | 11.2602 | -1.2354 |
| YRI | TRIM49L1 | 90024064 | 6.0668  | 10.0837 | -1.1923 |
| YRI | TRIM49L1 | 90029064 | 7.2135  | 12.2685 | -1.2483 |
| YRI | TRIM49L1 | 90034064 | 8.1846  | 12.2685 | -1.0085 |
| YRI | TRIM49L1 | 90039064 | 10.6877 | 17.4785 | -1.1976 |
| YRI | TRIM49L1 | 90044064 | 8.8009  | 17.6465 | -1.5457 |

## 2\_TajimasD\_data

|     |          |          |         |         |         |
|-----|----------|----------|---------|---------|---------|
| YRI | TRIM49L1 | 90049064 | 5.43    | 11.9324 | -1.6483 |
| YRI | TRIM49L1 | 90054064 | 5.92    | 11.4282 | -1.4542 |
| YRI | TRIM49L1 | 90059064 | 4.8673  | 12.4366 | -1.8454 |
| YRI | TRIM49L1 | 90064064 | 4.0595  | 12.6047 | -2.0571 |
| YRI | TRIM49L1 | 90069064 | 4.8822  | 11.7644 | -1.7681 |
| YRI | TRIM49L1 | 90074064 | 5.5459  | 12.9408 | -1.7364 |
| YRI | TRIM49L1 | 90079064 | 8.3853  | 14.1172 | -1.2394 |
| YRI | TRIM49L1 | 90084064 | 11.0553 | 14.4534 | -0.7185 |
| YRI | TRIM49L1 | 90089064 | 11.9258 | 14.7895 | -0.5924 |
| YRI | TRIM49L1 | 90094064 | 13.6123 | 15.2937 | -0.3369 |
| YRI | TRIM49L1 | 90099064 | 11.6025 | 14.1172 | -0.5437 |
| YRI | TRIM49L1 | 90104064 | 11.8633 | 15.4617 | -0.7135 |
| YRI | TRIM49L1 | 90109064 | 10.4726 | 15.4617 | -0.9893 |
| YRI | TRIM49L1 | 90114064 | 6.9499  | 13.1089 | -1.4287 |
| YRI | TRIM49L1 | 90119064 | 8.6256  | 13.613  | -1.1163 |
| YRI | TRIM49L1 | 90124064 | 7.4521  | 12.1005 | -1.1629 |
| YRI | TRIM49L1 | 90129064 | 6.8956  | 11.9324 | -1.2768 |
| YRI | TRIM49L1 | 90134064 | 5.2302  | 8.4031  | -1.1151 |
| YRI | TRIM49L1 | 90139064 | 10.0813 | 10.756  | -0.1885 |
| YRI | TRIM49L1 | 90144064 | 14.2831 | 15.9659 | -0.3236 |
| YRI | TRIM49L1 | 90149064 | 11.9065 | 13.445  | -0.3484 |
| YRI | TRIM49L1 | 90154064 | 11.3777 | 15.2937 | -0.7846 |
| YRI | TRIM49L1 | 90159064 | 8.2263  | 14.4534 | -1.3167 |
| YRI | TRIM49L1 | 90164064 | 7.6648  | 11.7644 | -1.0532 |
| YRI | TRIM49L1 | 90169064 | 7.2788  | 11.7644 | -1.1524 |
| YRI | TRIM49L1 | 90174064 | 7.4458  | 13.7811 | -1.4016 |
| YRI | TRIM49L1 | 90179064 | 7.4549  | 15.7978 | -1.6207 |
| YRI | TRIM49L1 | 90184064 | 9.1591  | 15.9659 | -1.309  |
| YRI | TRIM49L1 | 90189064 | 18.3631 | 19.9994 | -0.2535 |
| YRI | TRIM49L1 | 90194064 | 18.7972 | 22.1842 | -0.4748 |
| YRI | TRIM49L1 | 90199064 | 16.4432 | 22.0162 | -0.787  |
| YRI | TRIM49L1 | 90204064 | 15.5683 | 20.8397 | -0.785  |
| YRI | TRIM49L1 | 90209064 | 12.6397 | 20.3355 | -1.1734 |
| YRI | TRIM49L1 | 90214064 | 13.3503 | 20.6717 | -1.0988 |
| YRI | TRIM49L1 | 90219064 | 13.6875 | 22.3523 | -1.2058 |
| YRI | TRIM49L1 | 90224064 | 20.388  | 24.0329 | -0.4729 |
| YRI | TRIM49L1 | 90229064 | 28.6829 | 22.6884 | 0.8223  |
| YRI | TRIM49L1 | 90234064 | 32.5512 | 23.8648 | 1.1346  |
| YRI | TRIM49L1 | 90239064 | 32.6204 | 23.6968 | 1.1736  |
| YRI | TRIM49L1 | 90244064 | 22.1145 | 20.8397 | 0.1898  |
| YRI | TRIM49L1 | 90249064 | 16.423  | 19.1591 | -0.4418 |
| YRI | TRIM49L1 | 90254064 | 14.7982 | 16.9743 | -0.3947 |
| YRI | TRIM49L1 | 90259064 | 10.1148 | 13.2769 | -0.7247 |
| YRI | TRIM49L1 | 90264064 | 8.1988  | 12.9408 | -1.1135 |
| YRI | TRIM49L1 | 90269064 | 8.0226  | 17.3104 | -1.6532 |
| YRI | TRIM49L1 | 90274064 | 11.7493 | 19.6633 | -1.2463 |
| YRI | TRIM49L1 | 90279064 | 11.4953 | 18.6549 | -1.1861 |
| YRI | TRIM49L1 | 90284064 | 8.3999  | 14.7895 | -1.3218 |
| YRI | TRIM49L1 | 90289064 | 7.2049  | 12.2685 | -1.2504 |

## 2\_TajimasD\_data

|     |          |          |         |         |         |
|-----|----------|----------|---------|---------|---------|
| YRI | TRIM49L1 | 90294064 | 13.3965 | 16.134  | -0.5212 |
| YRI | TRIM49L1 | 90299064 | 17.963  | 16.8062 | 0.2118  |
| YRI | TRIM49L1 | 90304064 | 16.052  | 15.2937 | 0.1519  |
| YRI | TRIM49L1 | 90309064 | 18.5467 | 19.4952 | -0.1506 |
| YRI | TRIM49L1 | 90314064 | 21.3685 | 22.6884 | -0.181  |
| YRI | TRIM49L1 | 90319064 | 15.0243 | 17.1423 | -0.3805 |
| YRI | TRIM49L1 | 90324064 | 14.4244 | 15.1256 | -0.142  |
| YRI | TRIM49L1 | 90329064 | 19.8932 | 17.8146 | 0.3599  |
| YRI | TRIM49L1 | 90334064 | 15.6739 | 16.302  | -0.1184 |
| YRI | TRIM49L1 | 90339064 | 12.7183 | 15.2937 | -0.516  |
| YRI | TRIM49L1 | 90344064 | 16.4404 | 15.4617 | 0.1941  |
| YRI | TRIM49L1 | 90349064 | 17.5906 | 15.6298 | 0.3848  |
| YRI | TRIM49L1 | 90354064 | 17.3757 | 16.9743 | 0.0728  |
| YRI | TRIM49L1 | 90359064 | 17.9826 | 16.9743 | 0.1829  |
| YRI | TRIM49L1 | 90364064 | 14.4907 | 14.2853 | 0.0439  |
| YRI | TRIM49L1 | 90369064 | 17.8579 | 17.1423 | 0.1286  |
| YRI | TRIM49L1 | 90374064 | 26.6288 | 22.0162 | 0.6514  |
| YRI | TRIM49L1 | 90379064 | 22.17   | 21.1758 | 0.1458  |
| YRI | TRIM49L1 | 90384064 | 15.8341 | 18.3188 | -0.4189 |
| YRI | TRIM49L1 | 90389064 | 14.2639 | 16.4701 | -0.4119 |
| YRI | TRIM49L1 | 90394064 | 13.4045 | 15.2937 | -0.3785 |
| YRI | TRIM49L1 | 90399064 | 13.9592 | 16.4701 | -0.4687 |
| YRI | TRIM49L1 | 90404064 | 14.8686 | 18.991  | -0.6713 |
| YRI | TRIM49L1 | 90409064 | 22.5968 | 21.512  | 0.1567  |
| YRI | TRIM49L1 | 90414064 | 24.748  | 20.6717 | 0.6118  |
| YRI | TRIM49L1 | 90419064 | 29.4213 | 26.3858 | 0.3597  |
| YRI | TRIM49L1 | 90424064 | 30.5606 | 27.5622 | 0.3405  |
