# Supplementary material for: Detecting adaptive changes in gene copy number distribution accompanying the human out-of-Africa expansion
Source: PubMed Central journal article supplement (PMC11420239; doi:10.1038/s41439-024-00293-w), 2024-09-23
Supplement: 41439_2024_293_MOESM3_ESM.pdf [file 41439_2024_293_MOESM3_ESM.pdf]

### 3\_Introgression\_data

| POP | CHR  | GENE  | POS       | INTRO_SNPS |
|-----|------|-------|-----------|------------|
| CEU | chr1 | AMY1A | 98705519  | 0          |
| CEU | chr1 | AMY1A | 98755519  | 0          |
| CEU | chr1 | AMY1A | 98805519  | 0          |
| CEU | chr1 | AMY1A | 98855519  | 0          |
| CEU | chr1 | AMY1A | 98905519  | 0          |
| CEU | chr1 | AMY1A | 98955519  | 0          |
| CEU | chr1 | AMY1A | 99005519  | 0          |
| CEU | chr1 | AMY1A | 99055519  | 0          |
| CEU | chr1 | AMY1A | 99105519  | 0          |
| CEU | chr1 | AMY1A | 99155519  | 0          |
| CEU | chr1 | AMY1A | 99205519  | 0          |
| CEU | chr1 | AMY1A | 99255519  | 0          |
| CEU | chr1 | AMY1A | 99305519  | 0          |
| CEU | chr1 | AMY1A | 99355519  | 0          |
| CEU | chr1 | AMY1A | 99405519  | 0          |
| CEU | chr1 | AMY1A | 99455519  | 0          |
| CEU | chr1 | AMY1A | 99505519  | 0          |
| CEU | chr1 | AMY1A | 99555519  | 0          |
| CEU | chr1 | AMY1A | 99605519  | 0          |
| CEU | chr1 | AMY1A | 99655519  | 0          |
| CEU | chr1 | AMY1A | 99705519  | 0          |
| CEU | chr1 | AMY1A | 99755519  | 0          |
| CEU | chr1 | AMY1A | 99805519  | 0          |
| CEU | chr1 | AMY1A | 99855519  | 0          |
| CEU | chr1 | AMY1A | 99905519  | 0          |
| CEU | chr1 | AMY1A | 99955519  | 0          |
| CEU | chr1 | AMY1A | 100005519 | 0          |
| CEU | chr1 | AMY1A | 100055519 | 0          |
| CEU | chr1 | AMY1A | 100105519 | 0          |
| CEU | chr1 | AMY1A | 100155519 | 0          |
| CEU | chr1 | AMY1A | 100205519 | 0          |
| CEU | chr1 | AMY1A | 100255519 | 0          |
| CEU | chr1 | AMY1A | 100305519 | 0          |
| CEU | chr1 | AMY1A | 100355519 | 0          |
| CEU | chr1 | AMY1A | 100405519 | 0          |
| CEU | chr1 | AMY1A | 100455519 | 0          |
| CEU | chr1 | AMY1A | 100505519 | 0          |
| CEU | chr1 | AMY1A | 100555519 | 0          |
| CEU | chr1 | AMY1A | 100605519 | 0          |
| CEU | chr1 | AMY1A | 100655519 | 0          |
| CEU | chr1 | AMY1A | 100705519 | 0          |
| CEU | chr1 | AMY1A | 100755519 | 0          |
| CEU | chr1 | AMY1A | 100805519 | 0          |
| CEU | chr1 | AMY1A | 100855519 | 0          |
| CEU | chr1 | AMY1A | 100905519 | 0          |
| CEU | chr1 | AMY1A | 100955519 | 0          |
| CEU | chr1 | AMY1A | 101005519 | 0          |
| CEU | chr1 | AMY1A | 101055519 | 0          |

### 3\_Introgression\_data

|     |      |       |           |     |
|-----|------|-------|-----------|-----|
| CEU | chr1 | AMY1A | 101105519 | 0   |
| CEU | chr1 | AMY1A | 101155519 | 0   |
| CEU | chr1 | AMY1A | 101205519 | 0   |
| CEU | chr1 | AMY1A | 101255519 | 0   |
| CEU | chr1 | AMY1A | 101305519 | 0   |
| CEU | chr1 | AMY1A | 101355519 | 0   |
| CEU | chr1 | AMY1A | 101405519 | 0   |
| CEU | chr1 | AMY1A | 101455519 | 0   |
| CEU | chr1 | AMY1A | 101505519 | 0   |
| CEU | chr1 | AMY1A | 101555519 | 0   |
| CEU | chr1 | AMY1A | 101605519 | 0   |
| CEU | chr1 | AMY1A | 101655519 | 0   |
| CEU | chr1 | AMY1A | 101705519 | 0   |
| CEU | chr1 | AMY1A | 101755519 | 0   |
| CEU | chr1 | AMY1A | 101805519 | 1   |
| CEU | chr1 | AMY1A | 101855519 | 22  |
| CEU | chr1 | AMY1A | 101905519 | 50  |
| CEU | chr1 | AMY1A | 101955519 | 167 |
| CEU | chr1 | AMY1A | 102005519 | 148 |
| CEU | chr1 | AMY1A | 102055519 | 10  |
| CEU | chr1 | AMY1A | 102105519 | 0   |
| CEU | chr1 | AMY1A | 102155519 | 0   |
| CEU | chr1 | AMY1A | 102205519 | 0   |
| CEU | chr1 | AMY1A | 102255519 | 0   |
| CEU | chr1 | AMY1A | 102305519 | 0   |
| CEU | chr1 | AMY1A | 102355519 | 0   |
| CEU | chr1 | AMY1A | 102405519 | 0   |
| CEU | chr1 | AMY1A | 102455519 | 0   |
| CEU | chr1 | AMY1A | 102505519 | 0   |
| CEU | chr1 | AMY1A | 102555519 | 0   |
| CEU | chr1 | AMY1A | 102605519 | 0   |
| CEU | chr1 | AMY1A | 102655519 | 0   |
| CEU | chr1 | AMY1A | 102705519 | 0   |
| CEU | chr1 | AMY1A | 102755519 | 0   |
| CEU | chr1 | AMY1A | 102805519 | 0   |
| CEU | chr1 | AMY1A | 102855519 | 0   |
| CEU | chr1 | AMY1A | 102905519 | 0   |
| CEU | chr1 | AMY1A | 102955519 | 0   |
| CEU | chr1 | AMY1A | 103005519 | 0   |
| CEU | chr1 | AMY1A | 103055519 | 0   |
| CEU | chr1 | AMY1A | 103105519 | 0   |
| CEU | chr1 | AMY1A | 103155519 | 0   |
| CEU | chr1 | AMY1A | 103205519 | 0   |
| CEU | chr1 | AMY1A | 103255519 | 0   |
| CEU | chr1 | AMY1A | 103305519 | 0   |
| CEU | chr1 | AMY1A | 103355519 | 0   |
| CEU | chr1 | AMY1A | 103405519 | 0   |
| CEU | chr1 | AMY1A | 103455519 | 0   |
| CEU | chr1 | AMY1A | 103505519 | 0   |

### 3\_Introgression\_data

|     |      |       |           |   |
|-----|------|-------|-----------|---|
| CEU | chr1 | AMY1A | 103555519 | 0 |
| CEU | chr1 | AMY1A | 103605519 | 0 |
| CEU | chr1 | AMY1A | 103655519 | 0 |
| CEU | chr1 | AMY1A | 103705519 | 0 |
| CEU | chr1 | AMY1A | 103755519 | 0 |
| CEU | chr1 | AMY1A | 103805519 | 0 |
| CEU | chr1 | AMY1A | 103855519 | 0 |
| CEU | chr1 | AMY1A | 103905519 | 0 |
| CEU | chr1 | AMY1A | 103955519 | 0 |
| CEU | chr1 | AMY1A | 104005519 | 0 |
| CEU | chr1 | AMY1A | 104055519 | 0 |
| CEU | chr1 | AMY1A | 104105519 | 0 |
| CEU | chr1 | AMY1A | 104155519 | 0 |
| CEU | chr1 | AMY1A | 104205519 | 0 |
| CEU | chr1 | AMY1A | 104255519 | 0 |
| CEU | chr1 | AMY1A | 104305519 | 0 |
| CEU | chr1 | AMY1A | 104355519 | 0 |
| CEU | chr1 | AMY1A | 104405519 | 0 |
| CEU | chr1 | AMY1A | 104455519 | 0 |
| CEU | chr1 | AMY1A | 104505519 | 0 |
| CEU | chr1 | AMY1A | 104555519 | 0 |
| CEU | chr1 | AMY1A | 104605519 | 0 |
| CEU | chr1 | AMY1A | 104655519 | 0 |
| CEU | chr1 | AMY1A | 104705519 | 0 |
| CEU | chr1 | AMY1A | 104755519 | 0 |
| CEU | chr1 | AMY1A | 104805519 | 0 |
| CEU | chr1 | AMY1A | 104855519 | 0 |
| CEU | chr1 | AMY1A | 104905519 | 0 |
| CEU | chr1 | AMY1A | 104955519 | 0 |
| CEU | chr1 | AMY1A | 105005519 | 0 |
| CEU | chr1 | AMY1A | 105055519 | 0 |
| CEU | chr1 | AMY1A | 105105519 | 0 |
| CEU | chr1 | AMY1A | 105155519 | 0 |
| CEU | chr1 | AMY1A | 105205519 | 0 |
| CEU | chr1 | AMY1A | 105255519 | 0 |
| CEU | chr1 | AMY1A | 105305519 | 0 |
| CEU | chr1 | AMY1A | 105355519 | 0 |
| CEU | chr1 | AMY1A | 105405519 | 0 |
| CEU | chr1 | AMY1A | 105455519 | 0 |
| CEU | chr1 | AMY1A | 105505519 | 0 |
| CEU | chr1 | AMY1A | 105555519 | 0 |
| CEU | chr1 | AMY1A | 105605519 | 0 |
| CEU | chr1 | AMY1A | 105655519 | 0 |
| CEU | chr1 | AMY1A | 105705519 | 0 |
| CEU | chr1 | AMY1A | 105755519 | 0 |
| CEU | chr1 | AMY1A | 105805519 | 0 |
| CEU | chr1 | AMY1A | 105855519 | 0 |
| CEU | chr1 | AMY1A | 105905519 | 0 |
| CEU | chr1 | AMY1A | 105955519 | 0 |

3\_Introgression\_data

|     |      |       |           |   |
|-----|------|-------|-----------|---|
| CEU | chr1 | AMY1A | 106005519 | 0 |
| CEU | chr1 | AMY1A | 106055519 | 0 |
| CEU | chr1 | AMY1A | 106105519 | 0 |
| CEU | chr1 | AMY1A | 106155519 | 0 |
| CEU | chr1 | AMY1A | 106205519 | 0 |
| CEU | chr1 | AMY1A | 106255519 | 0 |
| CEU | chr1 | AMY1A | 106305519 | 0 |
| CEU | chr1 | AMY1A | 106355519 | 0 |
| CEU | chr1 | AMY1A | 106405519 | 0 |
| CEU | chr1 | AMY1A | 106455519 | 0 |
| CEU | chr1 | AMY1A | 106505519 | 0 |
| CEU | chr1 | AMY1A | 106555519 | 0 |
| CEU | chr1 | AMY1A | 106605519 | 0 |
| CEU | chr1 | AMY1A | 106655519 | 0 |
| CEU | chr1 | AMY1A | 106705519 | 0 |
| CEU | chr1 | AMY1A | 106755519 | 0 |
| CEU | chr1 | AMY1A | 106805519 | 0 |
| CEU | chr1 | AMY1A | 106855519 | 0 |
| CEU | chr1 | AMY1A | 106905519 | 0 |
| CEU | chr1 | AMY1A | 106955519 | 0 |
| CEU | chr1 | AMY1A | 107005519 | 0 |
| CEU | chr1 | AMY1A | 107055519 | 0 |
| CEU | chr1 | AMY1A | 107105519 | 0 |
| CEU | chr1 | AMY1A | 107155519 | 0 |
| CEU | chr1 | AMY1A | 107205519 | 0 |
| CEU | chr1 | AMY1A | 107255519 | 0 |
| CEU | chr1 | AMY1A | 107305519 | 0 |
| CEU | chr1 | AMY1A | 107355519 | 0 |
| CEU | chr1 | AMY1A | 107405519 | 0 |
| CEU | chr1 | AMY1A | 107455519 | 0 |
| CEU | chr1 | AMY1A | 107505519 | 0 |
| CEU | chr1 | AMY1A | 107555519 | 0 |
| CEU | chr1 | AMY1A | 107605519 | 0 |
| CEU | chr1 | AMY1A | 107655519 | 0 |
| CEU | chr1 | AMY1A | 107705519 | 0 |
| CEU | chr1 | AMY1A | 107755519 | 0 |
| CEU | chr1 | AMY1A | 107805519 | 0 |
| CEU | chr1 | AMY1A | 107855519 | 0 |
| CEU | chr1 | AMY1A | 107905519 | 0 |
| CEU | chr1 | AMY1A | 107955519 | 0 |
| CEU | chr1 | AMY1A | 108005519 | 0 |
| CEU | chr1 | AMY1A | 108055519 | 0 |
| CEU | chr1 | AMY1A | 108105519 | 0 |
| CEU | chr1 | AMY1A | 108155519 | 0 |
| CEU | chr1 | AMY1A | 108205519 | 0 |
| CEU | chr1 | AMY1A | 108255519 | 0 |
| CEU | chr1 | AMY1A | 108305519 | 0 |
| CEU | chr1 | AMY1A | 108355519 | 0 |
| CEU | chr1 | AMY1A | 108405519 | 0 |

3\_Introgression\_data

|     |       |        |           |    |
|-----|-------|--------|-----------|----|
| CEU | chr1  | AMY1A  | 108455519 | 0  |
| CEU | chr1  | AMY1A  | 108505519 | 0  |
| CEU | chr1  | AMY1A  | 108555519 | 0  |
| CEU | chr1  | AMY1A  | 108605519 | 0  |
| CEU | chr16 | BOLA2B | 24503588  | 0  |
| CEU | chr16 | BOLA2B | 24553588  | 0  |
| CEU | chr16 | BOLA2B | 24603588  | 0  |
| CEU | chr16 | BOLA2B | 24653588  | 0  |
| CEU | chr16 | BOLA2B | 24703588  | 0  |
| CEU | chr16 | BOLA2B | 24753588  | 0  |
| CEU | chr16 | BOLA2B | 24803588  | 0  |
| CEU | chr16 | BOLA2B | 24853588  | 0  |
| CEU | chr16 | BOLA2B | 24903588  | 0  |
| CEU | chr16 | BOLA2B | 24953588  | 0  |
| CEU | chr16 | BOLA2B | 25003588  | 0  |
| CEU | chr16 | BOLA2B | 25053588  | 0  |
| CEU | chr16 | BOLA2B | 25103588  | 0  |
| CEU | chr16 | BOLA2B | 25153588  | 0  |
| CEU | chr16 | BOLA2B | 25203588  | 0  |
| CEU | chr16 | BOLA2B | 25253588  | 0  |
| CEU | chr16 | BOLA2B | 25303588  | 0  |
| CEU | chr16 | BOLA2B | 25353588  | 0  |
| CEU | chr16 | BOLA2B | 25403588  | 0  |
| CEU | chr16 | BOLA2B | 25453588  | 0  |
| CEU | chr16 | BOLA2B | 25503588  | 0  |
| CEU | chr16 | BOLA2B | 25553588  | 0  |
| CEU | chr16 | BOLA2B | 25603588  | 0  |
| CEU | chr16 | BOLA2B | 25653588  | 0  |
| CEU | chr16 | BOLA2B | 25703588  | 0  |
| CEU | chr16 | BOLA2B | 25753588  | 0  |
| CEU | chr16 | BOLA2B | 25803588  | 0  |
| CEU | chr16 | BOLA2B | 25853588  | 0  |
| CEU | chr16 | BOLA2B | 25903588  | 9  |
| CEU | chr16 | BOLA2B | 25953588  | 46 |
| CEU | chr16 | BOLA2B | 26003588  | 37 |
| CEU | chr16 | BOLA2B | 26053588  | 0  |
| CEU | chr16 | BOLA2B | 26103588  | 0  |
| CEU | chr16 | BOLA2B | 26153588  | 0  |
| CEU | chr16 | BOLA2B | 26203588  | 0  |
| CEU | chr16 | BOLA2B | 26253588  | 0  |
| CEU | chr16 | BOLA2B | 26303588  | 0  |
| CEU | chr16 | BOLA2B | 26353588  | 0  |
| CEU | chr16 | BOLA2B | 26403588  | 0  |
| CEU | chr16 | BOLA2B | 26453588  | 0  |
| CEU | chr16 | BOLA2B | 26503588  | 0  |
| CEU | chr16 | BOLA2B | 26553588  | 0  |
| CEU | chr16 | BOLA2B | 26603588  | 0  |
| CEU | chr16 | BOLA2B | 26653588  | 0  |
| CEU | chr16 | BOLA2B | 26703588  | 0  |

3\_Introgression\_data

|     |       |        |          |   |
|-----|-------|--------|----------|---|
| CEU | chr16 | BOLA2B | 26753588 | 0 |
| CEU | chr16 | BOLA2B | 26803588 | 0 |
| CEU | chr16 | BOLA2B | 26853588 | 0 |
| CEU | chr16 | BOLA2B | 26903588 | 0 |
| CEU | chr16 | BOLA2B | 26953588 | 0 |
| CEU | chr16 | BOLA2B | 27003588 | 0 |
| CEU | chr16 | BOLA2B | 27053588 | 0 |
| CEU | chr16 | BOLA2B | 27103588 | 0 |
| CEU | chr16 | BOLA2B | 27153588 | 0 |
| CEU | chr16 | BOLA2B | 27203588 | 0 |
| CEU | chr16 | BOLA2B | 27253588 | 0 |
| CEU | chr16 | BOLA2B | 27303588 | 0 |
| CEU | chr16 | BOLA2B | 27353588 | 0 |
| CEU | chr16 | BOLA2B | 27403588 | 0 |
| CEU | chr16 | BOLA2B | 27453588 | 0 |
| CEU | chr16 | BOLA2B | 27503588 | 0 |
| CEU | chr16 | BOLA2B | 27553588 | 0 |
| CEU | chr16 | BOLA2B | 27603588 | 0 |
| CEU | chr16 | BOLA2B | 27653588 | 0 |
| CEU | chr16 | BOLA2B | 27703588 | 0 |
| CEU | chr16 | BOLA2B | 27753588 | 0 |
| CEU | chr16 | BOLA2B | 27803588 | 0 |
| CEU | chr16 | BOLA2B | 27853588 | 0 |
| CEU | chr16 | BOLA2B | 27903588 | 0 |
| CEU | chr16 | BOLA2B | 27953588 | 0 |
| CEU | chr16 | BOLA2B | 28003588 | 0 |
| CEU | chr16 | BOLA2B | 28053588 | 0 |
| CEU | chr16 | BOLA2B | 28103588 | 0 |
| CEU | chr16 | BOLA2B | 28153588 | 0 |
| CEU | chr16 | BOLA2B | 28203588 | 0 |
| CEU | chr16 | BOLA2B | 28253588 | 0 |
| CEU | chr16 | BOLA2B | 28303588 | 0 |
| CEU | chr16 | BOLA2B | 28353588 | 0 |
| CEU | chr16 | BOLA2B | 28403588 | 0 |
| CEU | chr16 | BOLA2B | 28453588 | 0 |
| CEU | chr16 | BOLA2B | 28503588 | 0 |
| CEU | chr16 | BOLA2B | 28553588 | 0 |
| CEU | chr16 | BOLA2B | 28603588 | 0 |
| CEU | chr16 | BOLA2B | 28653588 | 0 |
| CEU | chr16 | BOLA2B | 28703588 | 0 |
| CEU | chr16 | BOLA2B | 28753588 | 0 |
| CEU | chr16 | BOLA2B | 28803588 | 0 |
| CEU | chr16 | BOLA2B | 28853588 | 0 |
| CEU | chr16 | BOLA2B | 28903588 | 0 |
| CEU | chr16 | BOLA2B | 28953588 | 0 |
| CEU | chr16 | BOLA2B | 29003588 | 0 |
| CEU | chr16 | BOLA2B | 29053588 | 0 |
| CEU | chr16 | BOLA2B | 29103588 | 0 |
| CEU | chr16 | BOLA2B | 29153588 | 0 |

### 3\_Introgression\_data

|     |       |        |          |   |
|-----|-------|--------|----------|---|
| CEU | chr16 | BOLA2B | 29203588 | 0 |
| CEU | chr16 | BOLA2B | 29253588 | 0 |
| CEU | chr16 | BOLA2B | 29303588 | 0 |
| CEU | chr16 | BOLA2B | 29353588 | 0 |
| CEU | chr16 | BOLA2B | 29403588 | 0 |
| CEU | chr16 | BOLA2B | 29453588 | 0 |
| CEU | chr16 | BOLA2B | 29503588 | 0 |
| CEU | chr16 | BOLA2B | 29553588 | 0 |
| CEU | chr16 | BOLA2B | 29603588 | 0 |
| CEU | chr16 | BOLA2B | 29653588 | 0 |
| CEU | chr16 | BOLA2B | 29703588 | 0 |
| CEU | chr16 | BOLA2B | 29753588 | 0 |
| CEU | chr16 | BOLA2B | 29803588 | 0 |
| CEU | chr16 | BOLA2B | 29853588 | 0 |
| CEU | chr16 | BOLA2B | 29903588 | 0 |
| CEU | chr16 | BOLA2B | 29953588 | 0 |
| CEU | chr16 | BOLA2B | 30003588 | 0 |
| CEU | chr16 | BOLA2B | 30053588 | 0 |
| CEU | chr16 | BOLA2B | 30103588 | 0 |
| CEU | chr16 | BOLA2B | 30153588 | 0 |
| CEU | chr16 | BOLA2B | 30203588 | 0 |
| CEU | chr16 | BOLA2B | 30253588 | 0 |
| CEU | chr16 | BOLA2B | 30303588 | 0 |
| CEU | chr16 | BOLA2B | 30353588 | 0 |
| CEU | chr16 | BOLA2B | 30403588 | 0 |
| CEU | chr16 | BOLA2B | 30453588 | 0 |
| CEU | chr16 | BOLA2B | 30503588 | 0 |
| CEU | chr16 | BOLA2B | 30553588 | 0 |
| CEU | chr16 | BOLA2B | 30603588 | 0 |
| CEU | chr16 | BOLA2B | 30653588 | 0 |
| CEU | chr16 | BOLA2B | 30703588 | 0 |
| CEU | chr16 | BOLA2B | 30753588 | 0 |
| CEU | chr16 | BOLA2B | 30803588 | 0 |
| CEU | chr16 | BOLA2B | 30853588 | 0 |
| CEU | chr16 | BOLA2B | 30903588 | 0 |
| CEU | chr16 | BOLA2B | 30953588 | 0 |
| CEU | chr16 | BOLA2B | 31003588 | 0 |
| CEU | chr16 | BOLA2B | 31053588 | 0 |
| CEU | chr16 | BOLA2B | 31103588 | 0 |
| CEU | chr16 | BOLA2B | 31153588 | 0 |
| CEU | chr16 | BOLA2B | 31203588 | 0 |
| CEU | chr16 | BOLA2B | 31253588 | 0 |
| CEU | chr16 | BOLA2B | 31303588 | 0 |
| CEU | chr16 | BOLA2B | 31353588 | 0 |
| CEU | chr16 | BOLA2B | 31403588 | 0 |
| CEU | chr16 | BOLA2B | 31453588 | 0 |
| CEU | chr16 | BOLA2B | 31503588 | 0 |
| CEU | chr16 | BOLA2B | 31553588 | 0 |
| CEU | chr16 | BOLA2B | 31603588 | 0 |

## 3\_Introgression\_data

|     |       |        |          |   |
|-----|-------|--------|----------|---|
| CEU | chr16 | BOLA2B | 31653588 | 0 |
| CEU | chr16 | BOLA2B | 31703588 | 0 |
| CEU | chr16 | BOLA2B | 31753588 | 0 |
| CEU | chr16 | BOLA2B | 31803588 | 0 |
| CEU | chr16 | BOLA2B | 31853588 | 0 |
| CEU | chr16 | BOLA2B | 31903588 | 0 |
| CEU | chr16 | BOLA2B | 31953588 | 0 |
| CEU | chr16 | BOLA2B | 32003588 | 0 |
| CEU | chr16 | BOLA2B | 32053588 | 0 |
| CEU | chr16 | BOLA2B | 32103588 | 0 |
| CEU | chr16 | BOLA2B | 32153588 | 0 |
| CEU | chr16 | BOLA2B | 32203588 | 0 |
| CEU | chr16 | BOLA2B | 32253588 | 0 |
| CEU | chr16 | BOLA2B | 32303588 | 0 |
| CEU | chr16 | BOLA2B | 32353588 | 0 |
| CEU | chr16 | BOLA2B | 32403588 | 0 |
| CEU | chr16 | BOLA2B | 32453588 | 0 |
| CEU | chr16 | BOLA2B | 32503588 | 0 |
| CEU | chr16 | BOLA2B | 32553588 | 0 |
| CEU | chr16 | BOLA2B | 32603588 | 0 |
| CEU | chr16 | BOLA2B | 32653588 | 0 |
| CEU | chr16 | BOLA2B | 32703588 | 0 |
| CEU | chr16 | BOLA2B | 32753588 | 0 |
| CEU | chr16 | BOLA2B | 32803588 | 0 |
| CEU | chr16 | BOLA2B | 32853588 | 0 |
| CEU | chr16 | BOLA2B | 32903588 | 0 |
| CEU | chr16 | BOLA2B | 32953588 | 0 |
| CEU | chr16 | BOLA2B | 33003588 | 0 |
| CEU | chr16 | BOLA2B | 33053588 | 0 |
| CEU | chr16 | BOLA2B | 33103588 | 0 |
| CEU | chr16 | BOLA2B | 33153588 | 0 |
| CEU | chr16 | BOLA2B | 33203588 | 0 |
| CEU | chr16 | BOLA2B | 33253588 | 0 |
| CEU | chr16 | BOLA2B | 33303588 | 0 |
| CEU | chr16 | BOLA2B | 33353588 | 0 |
| CEU | chr16 | BOLA2B | 33403588 | 0 |
| CEU | chr16 | BOLA2B | 33453588 | 0 |
| CEU | chr16 | BOLA2B | 33503588 | 0 |
| CEU | chr16 | BOLA2B | 33553588 | 0 |
| CEU | chr16 | BOLA2B | 33603588 | 0 |
| CEU | chr16 | BOLA2B | 33653588 | 0 |
| CEU | chr16 | BOLA2B | 33703588 | 0 |
| CEU | chr16 | BOLA2B | 33753588 | 0 |
| CEU | chr16 | BOLA2B | 33803588 | 0 |
| CEU | chr16 | BOLA2B | 33853588 | 0 |
| CEU | chr16 | BOLA2B | 33903588 | 0 |
| CEU | chr16 | BOLA2B | 33953588 | 0 |
| CEU | chr16 | BOLA2B | 34003588 | 0 |
| CEU | chr16 | BOLA2B | 34053588 | 0 |



### 3\_Introgression\_data

|     |       |        |          |   |
|-----|-------|--------|----------|---|
| CEU | chr16 | BOLA2B | 34103588 | 0 |
| CEU | chr16 | BOLA2B | 34153588 | 0 |
| CEU | chr16 | BOLA2B | 34203588 | 0 |
| CEU | chr16 | BOLA2B | 34253588 | 0 |
| CEU | chr16 | BOLA2B | 34303588 | 0 |
| CEU | chr16 | BOLA2B | 34353588 | 0 |
| CEU | chr16 | BOLA2B | 34403588 | 0 |
| CEU | chr9  | CBWD3  | 60716374 | 0 |
| CEU | chr9  | CBWD3  | 60766374 | 0 |
| CEU | chr9  | CBWD3  | 60816374 | 0 |
| CEU | chr9  | CBWD3  | 60866374 | 0 |
| CEU | chr9  | CBWD3  | 60916374 | 0 |
| CEU | chr9  | CBWD3  | 60966374 | 0 |
| CEU | chr9  | CBWD3  | 61016374 | 0 |
| CEU | chr9  | CBWD3  | 61066374 | 0 |
| CEU | chr9  | CBWD3  | 61116374 | 0 |
| CEU | chr9  | CBWD3  | 61166374 | 0 |
| CEU | chr9  | CBWD3  | 61216374 | 0 |
| CEU | chr9  | CBWD3  | 61266374 | 0 |
| CEU | chr9  | CBWD3  | 61316374 | 0 |
| CEU | chr9  | CBWD3  | 61366374 | 0 |
| CEU | chr9  | CBWD3  | 61416374 | 0 |
| CEU | chr9  | CBWD3  | 61466374 | 0 |
| CEU | chr9  | CBWD3  | 61516374 | 0 |
| CEU | chr9  | CBWD3  | 61566374 | 0 |
| CEU | chr9  | CBWD3  | 61616374 | 0 |
| CEU | chr9  | CBWD3  | 61666374 | 0 |
| CEU | chr9  | CBWD3  | 61716374 | 0 |
| CEU | chr9  | CBWD3  | 61766374 | 0 |
| CEU | chr9  | CBWD3  | 61816374 | 0 |
| CEU | chr9  | CBWD3  | 61866374 | 0 |
| CEU | chr9  | CBWD3  | 61916374 | 0 |
| CEU | chr9  | CBWD3  | 61966374 | 0 |
| CEU | chr9  | CBWD3  | 62016374 | 0 |
| CEU | chr9  | CBWD3  | 62066374 | 0 |
| CEU | chr9  | CBWD3  | 62116374 | 0 |
| CEU | chr9  | CBWD3  | 62166374 | 0 |
| CEU | chr9  | CBWD3  | 62216374 | 0 |
| CEU | chr9  | CBWD3  | 62266374 | 0 |
| CEU | chr9  | CBWD3  | 62316374 | 0 |
| CEU | chr9  | CBWD3  | 62366374 | 0 |
| CEU | chr9  | CBWD3  | 62416374 | 0 |
| CEU | chr9  | CBWD3  | 62466374 | 0 |
| CEU | chr9  | CBWD3  | 62516374 | 0 |
| CEU | chr9  | CBWD3  | 62566374 | 0 |
| CEU | chr9  | CBWD3  | 62616374 | 0 |
| CEU | chr9  | CBWD3  | 62666374 | 0 |
| CEU | chr9  | CBWD3  | 62716374 | 0 |
| CEU | chr9  | CBWD3  | 62766374 | 0 |

### 3\_Introgression\_data

|     |      |       |          |   |
|-----|------|-------|----------|---|
| CEU | chr9 | CBWD3 | 62816374 | 0 |
| CEU | chr9 | CBWD3 | 62866374 | 0 |
| CEU | chr9 | CBWD3 | 62916374 | 0 |
| CEU | chr9 | CBWD3 | 62966374 | 0 |
| CEU | chr9 | CBWD3 | 63016374 | 0 |
| CEU | chr9 | CBWD3 | 63066374 | 0 |
| CEU | chr9 | CBWD3 | 63116374 | 0 |
| CEU | chr9 | CBWD3 | 63166374 | 0 |
| CEU | chr9 | CBWD3 | 63216374 | 0 |
| CEU | chr9 | CBWD3 | 63266374 | 0 |
| CEU | chr9 | CBWD3 | 63316374 | 0 |
| CEU | chr9 | CBWD3 | 63366374 | 0 |
| CEU | chr9 | CBWD3 | 63416374 | 0 |
| CEU | chr9 | CBWD3 | 63466374 | 0 |
| CEU | chr9 | CBWD3 | 63516374 | 0 |
| CEU | chr9 | CBWD3 | 63566374 | 0 |
| CEU | chr9 | CBWD3 | 63616374 | 0 |
| CEU | chr9 | CBWD3 | 63666374 | 0 |
| CEU | chr9 | CBWD3 | 63716374 | 0 |
| CEU | chr9 | CBWD3 | 63766374 | 0 |
| CEU | chr9 | CBWD3 | 63816374 | 0 |
| CEU | chr9 | CBWD3 | 63866374 | 0 |
| CEU | chr9 | CBWD3 | 63916374 | 0 |
| CEU | chr9 | CBWD3 | 63966374 | 0 |
| CEU | chr9 | CBWD3 | 64016374 | 0 |
| CEU | chr9 | CBWD3 | 64066374 | 0 |
| CEU | chr9 | CBWD3 | 64116374 | 0 |
| CEU | chr9 | CBWD3 | 64166374 | 0 |
| CEU | chr9 | CBWD3 | 64216374 | 0 |
| CEU | chr9 | CBWD3 | 64266374 | 0 |
| CEU | chr9 | CBWD3 | 64316374 | 0 |
| CEU | chr9 | CBWD3 | 64366374 | 0 |
| CEU | chr9 | CBWD3 | 64416374 | 0 |
| CEU | chr9 | CBWD3 | 64466374 | 0 |
| CEU | chr9 | CBWD3 | 64516374 | 0 |
| CEU | chr9 | CBWD3 | 64566374 | 0 |
| CEU | chr9 | CBWD3 | 64616374 | 0 |
| CEU | chr9 | CBWD3 | 64666374 | 0 |
| CEU | chr9 | CBWD3 | 64716374 | 0 |
| CEU | chr9 | CBWD3 | 64766374 | 0 |
| CEU | chr9 | CBWD3 | 64816374 | 0 |
| CEU | chr9 | CBWD3 | 64866374 | 0 |
| CEU | chr9 | CBWD3 | 64916374 | 0 |
| CEU | chr9 | CBWD3 | 64966374 | 0 |
| CEU | chr9 | CBWD3 | 65016374 | 0 |
| CEU | chr9 | CBWD3 | 65066374 | 0 |
| CEU | chr9 | CBWD3 | 65116374 | 0 |
| CEU | chr9 | CBWD3 | 65166374 | 0 |
| CEU | chr9 | CBWD3 | 65216374 | 0 |

### 3\_Introgression\_data

|     |      |       |          |    |
|-----|------|-------|----------|----|
| CEU | chr9 | CBWD3 | 65266374 | 0  |
| CEU | chr9 | CBWD3 | 65316374 | 0  |
| CEU | chr9 | CBWD3 | 65366374 | 0  |
| CEU | chr9 | CBWD3 | 65416374 | 0  |
| CEU | chr9 | CBWD3 | 65466374 | 0  |
| CEU | chr9 | CBWD3 | 65516374 | 0  |
| CEU | chr9 | CBWD3 | 65566374 | 13 |
| CEU | chr9 | CBWD3 | 65616374 | 27 |
| CEU | chr9 | CBWD3 | 65666374 | 14 |
| CEU | chr9 | CBWD3 | 65716374 | 0  |
| CEU | chr9 | CBWD3 | 65766374 | 0  |
| CEU | chr9 | CBWD3 | 65816374 | 0  |
| CEU | chr9 | CBWD3 | 65866374 | 0  |
| CEU | chr9 | CBWD3 | 65916374 | 0  |
| CEU | chr9 | CBWD3 | 65966374 | 0  |
| CEU | chr9 | CBWD3 | 66016374 | 0  |
| CEU | chr9 | CBWD3 | 66066374 | 0  |
| CEU | chr9 | CBWD3 | 66116374 | 0  |
| CEU | chr9 | CBWD3 | 66166374 | 0  |
| CEU | chr9 | CBWD3 | 66216374 | 0  |
| CEU | chr9 | CBWD3 | 66266374 | 0  |
| CEU | chr9 | CBWD3 | 66316374 | 0  |
| CEU | chr9 | CBWD3 | 66366374 | 0  |
| CEU | chr9 | CBWD3 | 66416374 | 0  |
| CEU | chr9 | CBWD3 | 66466374 | 0  |
| CEU | chr9 | CBWD3 | 66516374 | 0  |
| CEU | chr9 | CBWD3 | 66566374 | 0  |
| CEU | chr9 | CBWD3 | 66616374 | 2  |
| CEU | chr9 | CBWD3 | 66666374 | 17 |
| CEU | chr9 | CBWD3 | 66716374 | 23 |
| CEU | chr9 | CBWD3 | 66766374 | 22 |
| CEU | chr9 | CBWD3 | 66816374 | 16 |
| CEU | chr9 | CBWD3 | 66866374 | 2  |
| CEU | chr9 | CBWD3 | 66916374 | 0  |
| CEU | chr9 | CBWD3 | 66966374 | 0  |
| CEU | chr9 | CBWD3 | 67016374 | 0  |
| CEU | chr9 | CBWD3 | 67066374 | 0  |
| CEU | chr9 | CBWD3 | 67116374 | 0  |
| CEU | chr9 | CBWD3 | 67166374 | 0  |
| CEU | chr9 | CBWD3 | 67216374 | 0  |
| CEU | chr9 | CBWD3 | 67266374 | 0  |
| CEU | chr9 | CBWD3 | 67316374 | 0  |
| CEU | chr9 | CBWD3 | 67366374 | 0  |
| CEU | chr9 | CBWD3 | 67416374 | 0  |
| CEU | chr9 | CBWD3 | 67466374 | 0  |
| CEU | chr9 | CBWD3 | 67516374 | 0  |
| CEU | chr9 | CBWD3 | 67566374 | 0  |
| CEU | chr9 | CBWD3 | 67616374 | 0  |
| CEU | chr9 | CBWD3 | 67666374 | 0  |

3\_Introgression\_data

|     |      |       |          |    |
|-----|------|-------|----------|----|
| CEU | chr9 | CBWD3 | 67716374 | 0  |
| CEU | chr9 | CBWD3 | 67766374 | 0  |
| CEU | chr9 | CBWD3 | 67816374 | 0  |
| CEU | chr9 | CBWD3 | 67866374 | 0  |
| CEU | chr9 | CBWD3 | 67916374 | 0  |
| CEU | chr9 | CBWD3 | 67966374 | 0  |
| CEU | chr9 | CBWD3 | 68016374 | 0  |
| CEU | chr9 | CBWD3 | 68066374 | 0  |
| CEU | chr9 | CBWD3 | 68116374 | 0  |
| CEU | chr9 | CBWD3 | 68166374 | 0  |
| CEU | chr9 | CBWD3 | 68216374 | 0  |
| CEU | chr9 | CBWD3 | 68266374 | 0  |
| CEU | chr9 | CBWD3 | 68316374 | 0  |
| CEU | chr9 | CBWD3 | 68366374 | 0  |
| CEU | chr9 | CBWD3 | 68416374 | 0  |
| CEU | chr9 | CBWD3 | 68466374 | 0  |
| CEU | chr9 | CBWD3 | 68516374 | 0  |
| CEU | chr9 | CBWD3 | 68566374 | 0  |
| CEU | chr9 | CBWD3 | 68616374 | 0  |
| CEU | chr9 | CBWD3 | 68666374 | 0  |
| CEU | chr9 | CBWD3 | 68716374 | 0  |
| CEU | chr9 | CBWD3 | 68766374 | 0  |
| CEU | chr9 | CBWD3 | 68816374 | 0  |
| CEU | chr9 | CBWD3 | 68866374 | 0  |
| CEU | chr9 | CBWD3 | 68916374 | 0  |
| CEU | chr9 | CBWD3 | 68966374 | 0  |
| CEU | chr9 | CBWD3 | 69016374 | 0  |
| CEU | chr9 | CBWD3 | 69066374 | 0  |
| CEU | chr9 | CBWD3 | 69116374 | 0  |
| CEU | chr9 | CBWD3 | 69166374 | 0  |
| CEU | chr9 | CBWD3 | 69216374 | 0  |
| CEU | chr9 | CBWD3 | 69266374 | 0  |
| CEU | chr9 | CBWD3 | 69316374 | 0  |
| CEU | chr9 | CBWD3 | 69366374 | 0  |
| CEU | chr9 | CBWD3 | 69416374 | 0  |
| CEU | chr9 | CBWD3 | 69466374 | 0  |
| CEU | chr9 | CBWD3 | 69516374 | 0  |
| CEU | chr9 | CBWD3 | 69566374 | 0  |
| CEU | chr9 | CBWD3 | 69616374 | 0  |
| CEU | chr9 | CBWD3 | 69666374 | 0  |
| CEU | chr9 | CBWD3 | 69716374 | 0  |
| CEU | chr9 | CBWD3 | 69766374 | 2  |
| CEU | chr9 | CBWD3 | 69816374 | 12 |
| CEU | chr9 | CBWD3 | 69866374 | 47 |
| CEU | chr9 | CBWD3 | 69916374 | 61 |
| CEU | chr9 | CBWD3 | 69966374 | 48 |
| CEU | chr9 | CBWD3 | 70016374 | 24 |
| CEU | chr9 | CBWD3 | 70066374 | 0  |
| CEU | chr9 | CBWD3 | 70116374 | 0  |

### 3\_Introgression\_data

|     |       |         |          |   |
|-----|-------|---------|----------|---|
| CEU | chr9  | CBWD3   | 70166374 | 0 |
| CEU | chr9  | CBWD3   | 70216374 | 0 |
| CEU | chr9  | CBWD3   | 70266374 | 0 |
| CEU | chr9  | CBWD3   | 70316374 | 0 |
| CEU | chr9  | CBWD3   | 70366374 | 0 |
| CEU | chr9  | CBWD3   | 70416374 | 0 |
| CEU | chr9  | CBWD3   | 70466374 | 0 |
| CEU | chr9  | CBWD3   | 70516374 | 0 |
| CEU | chr9  | CBWD3   | 70566374 | 0 |
| CEU | chr9  | CBWD3   | 70616374 | 0 |
| CEU | chr9  | CBWD3   | 70666374 | 0 |
| CEU | chr16 | CLEC18A | 65000232 | 0 |
| CEU | chr16 | CLEC18A | 65050232 | 0 |
| CEU | chr16 | CLEC18A | 65100232 | 0 |
| CEU | chr16 | CLEC18A | 65150232 | 0 |
| CEU | chr16 | CLEC18A | 65200232 | 0 |
| CEU | chr16 | CLEC18A | 65250232 | 0 |
| CEU | chr16 | CLEC18A | 65300232 | 0 |
| CEU | chr16 | CLEC18A | 65350232 | 0 |
| CEU | chr16 | CLEC18A | 65400232 | 0 |
| CEU | chr16 | CLEC18A | 65450232 | 0 |
| CEU | chr16 | CLEC18A | 65500232 | 0 |
| CEU | chr16 | CLEC18A | 65550232 | 0 |
| CEU | chr16 | CLEC18A | 65600232 | 0 |
| CEU | chr16 | CLEC18A | 65650232 | 0 |
| CEU | chr16 | CLEC18A | 65700232 | 0 |
| CEU | chr16 | CLEC18A | 65750232 | 0 |
| CEU | chr16 | CLEC18A | 65800232 | 0 |
| CEU | chr16 | CLEC18A | 65850232 | 0 |
| CEU | chr16 | CLEC18A | 65900232 | 0 |
| CEU | chr16 | CLEC18A | 65950232 | 0 |
| CEU | chr16 | CLEC18A | 66000232 | 0 |
| CEU | chr16 | CLEC18A | 66050232 | 0 |
| CEU | chr16 | CLEC18A | 66100232 | 0 |
| CEU | chr16 | CLEC18A | 66150232 | 0 |
| CEU | chr16 | CLEC18A | 66200232 | 0 |
| CEU | chr16 | CLEC18A | 66250232 | 0 |
| CEU | chr16 | CLEC18A | 66300232 | 0 |
| CEU | chr16 | CLEC18A | 66350232 | 0 |
| CEU | chr16 | CLEC18A | 66400232 | 0 |
| CEU | chr16 | CLEC18A | 66450232 | 0 |
| CEU | chr16 | CLEC18A | 66500232 | 0 |
| CEU | chr16 | CLEC18A | 66550232 | 0 |
| CEU | chr16 | CLEC18A | 66600232 | 0 |
| CEU | chr16 | CLEC18A | 66650232 | 0 |
| CEU | chr16 | CLEC18A | 66700232 | 0 |
| CEU | chr16 | CLEC18A | 66750232 | 0 |
| CEU | chr16 | CLEC18A | 66800232 | 0 |
| CEU | chr16 | CLEC18A | 66850232 | 0 |

## 3\_Introgression\_data

|     |       |         |          |   |
|-----|-------|---------|----------|---|
| CEU | chr16 | CLEC18A | 66900232 | 0 |
| CEU | chr16 | CLEC18A | 66950232 | 0 |
| CEU | chr16 | CLEC18A | 67000232 | 0 |
| CEU | chr16 | CLEC18A | 67050232 | 0 |
| CEU | chr16 | CLEC18A | 67100232 | 0 |
| CEU | chr16 | CLEC18A | 67150232 | 0 |
| CEU | chr16 | CLEC18A | 67200232 | 0 |
| CEU | chr16 | CLEC18A | 67250232 | 0 |
| CEU | chr16 | CLEC18A | 67300232 | 0 |
| CEU | chr16 | CLEC18A | 67350232 | 0 |
| CEU | chr16 | CLEC18A | 67400232 | 0 |
| CEU | chr16 | CLEC18A | 67450232 | 0 |
| CEU | chr16 | CLEC18A | 67500232 | 0 |
| CEU | chr16 | CLEC18A | 67550232 | 0 |
| CEU | chr16 | CLEC18A | 67600232 | 0 |
| CEU | chr16 | CLEC18A | 67650232 | 0 |
| CEU | chr16 | CLEC18A | 67700232 | 0 |
| CEU | chr16 | CLEC18A | 67750232 | 0 |
| CEU | chr16 | CLEC18A | 67800232 | 0 |
| CEU | chr16 | CLEC18A | 67850232 | 0 |
| CEU | chr16 | CLEC18A | 67900232 | 0 |
| CEU | chr16 | CLEC18A | 67950232 | 0 |
| CEU | chr16 | CLEC18A | 68000232 | 0 |
| CEU | chr16 | CLEC18A | 68050232 | 0 |
| CEU | chr16 | CLEC18A | 68100232 | 0 |
| CEU | chr16 | CLEC18A | 68150232 | 0 |
| CEU | chr16 | CLEC18A | 68200232 | 0 |
| CEU | chr16 | CLEC18A | 68250232 | 0 |
| CEU | chr16 | CLEC18A | 68300232 | 0 |
| CEU | chr16 | CLEC18A | 68350232 | 0 |
| CEU | chr16 | CLEC18A | 68400232 | 0 |
| CEU | chr16 | CLEC18A | 68450232 | 0 |
| CEU | chr16 | CLEC18A | 68500232 | 0 |
| CEU | chr16 | CLEC18A | 68550232 | 0 |
| CEU | chr16 | CLEC18A | 68600232 | 0 |
| CEU | chr16 | CLEC18A | 68650232 | 0 |
| CEU | chr16 | CLEC18A | 68700232 | 0 |
| CEU | chr16 | CLEC18A | 68750232 | 0 |
| CEU | chr16 | CLEC18A | 68800232 | 0 |
| CEU | chr16 | CLEC18A | 68850232 | 0 |
| CEU | chr16 | CLEC18A | 68900232 | 0 |
| CEU | chr16 | CLEC18A | 68950232 | 0 |
| CEU | chr16 | CLEC18A | 69000232 | 0 |
| CEU | chr16 | CLEC18A | 69050232 | 0 |
| CEU | chr16 | CLEC18A | 69100232 | 0 |
| CEU | chr16 | CLEC18A | 69150232 | 0 |
| CEU | chr16 | CLEC18A | 69200232 | 0 |
| CEU | chr16 | CLEC18A | 69250232 | 0 |
| CEU | chr16 | CLEC18A | 69300232 | 0 |

## 3\_Introgression\_data

|     |       |         |          |   |
|-----|-------|---------|----------|---|
| CEU | chr16 | CLEC18A | 69350232 | 0 |
| CEU | chr16 | CLEC18A | 69400232 | 0 |
| CEU | chr16 | CLEC18A | 69450232 | 0 |
| CEU | chr16 | CLEC18A | 69500232 | 0 |
| CEU | chr16 | CLEC18A | 69550232 | 0 |
| CEU | chr16 | CLEC18A | 69600232 | 0 |
| CEU | chr16 | CLEC18A | 69650232 | 0 |
| CEU | chr16 | CLEC18A | 69700232 | 0 |
| CEU | chr16 | CLEC18A | 69750232 | 0 |
| CEU | chr16 | CLEC18A | 69800232 | 0 |
| CEU | chr16 | CLEC18A | 69850232 | 0 |
| CEU | chr16 | CLEC18A | 69900232 | 0 |
| CEU | chr16 | CLEC18A | 69950232 | 0 |
| CEU | chr16 | CLEC18A | 70000232 | 0 |
| CEU | chr16 | CLEC18A | 70050232 | 0 |
| CEU | chr16 | CLEC18A | 70100232 | 0 |
| CEU | chr16 | CLEC18A | 70150232 | 0 |
| CEU | chr16 | CLEC18A | 70200232 | 0 |
| CEU | chr16 | CLEC18A | 70250232 | 0 |
| CEU | chr16 | CLEC18A | 70300232 | 0 |
| CEU | chr16 | CLEC18A | 70350232 | 0 |
| CEU | chr16 | CLEC18A | 70400232 | 0 |
| CEU | chr16 | CLEC18A | 70450232 | 0 |
| CEU | chr16 | CLEC18A | 70500232 | 0 |
| CEU | chr16 | CLEC18A | 70550232 | 0 |
| CEU | chr16 | CLEC18A | 70600232 | 0 |
| CEU | chr16 | CLEC18A | 70650232 | 0 |
| CEU | chr16 | CLEC18A | 70700232 | 0 |
| CEU | chr16 | CLEC18A | 70750232 | 0 |
| CEU | chr16 | CLEC18A | 70800232 | 0 |
| CEU | chr16 | CLEC18A | 70850232 | 0 |
| CEU | chr16 | CLEC18A | 70900232 | 0 |
| CEU | chr16 | CLEC18A | 70950232 | 0 |
| CEU | chr16 | CLEC18A | 71000232 | 0 |
| CEU | chr16 | CLEC18A | 71050232 | 0 |
| CEU | chr16 | CLEC18A | 71100232 | 0 |
| CEU | chr16 | CLEC18A | 71150232 | 0 |
| CEU | chr16 | CLEC18A | 71200232 | 0 |
| CEU | chr16 | CLEC18A | 71250232 | 0 |
| CEU | chr16 | CLEC18A | 71300232 | 0 |
| CEU | chr16 | CLEC18A | 71350232 | 0 |
| CEU | chr16 | CLEC18A | 71400232 | 0 |
| CEU | chr16 | CLEC18A | 71450232 | 0 |
| CEU | chr16 | CLEC18A | 71500232 | 0 |
| CEU | chr16 | CLEC18A | 71550232 | 0 |
| CEU | chr16 | CLEC18A | 71600232 | 0 |
| CEU | chr16 | CLEC18A | 71650232 | 0 |
| CEU | chr16 | CLEC18A | 71700232 | 0 |
| CEU | chr16 | CLEC18A | 71750232 | 0 |

## 3\_Introgression\_data

|     |       |         |          |   |
|-----|-------|---------|----------|---|
| CEU | chr16 | CLEC18A | 71800232 | 0 |
| CEU | chr16 | CLEC18A | 71850232 | 0 |
| CEU | chr16 | CLEC18A | 71900232 | 0 |
| CEU | chr16 | CLEC18A | 71950232 | 0 |
| CEU | chr16 | CLEC18A | 72000232 | 0 |
| CEU | chr16 | CLEC18A | 72050232 | 0 |
| CEU | chr16 | CLEC18A | 72100232 | 0 |
| CEU | chr16 | CLEC18A | 72150232 | 0 |
| CEU | chr16 | CLEC18A | 72200232 | 0 |
| CEU | chr16 | CLEC18A | 72250232 | 0 |
| CEU | chr16 | CLEC18A | 72300232 | 0 |
| CEU | chr16 | CLEC18A | 72350232 | 0 |
| CEU | chr16 | CLEC18A | 72400232 | 0 |
| CEU | chr16 | CLEC18A | 72450232 | 0 |
| CEU | chr16 | CLEC18A | 72500232 | 0 |
| CEU | chr16 | CLEC18A | 72550232 | 0 |
| CEU | chr16 | CLEC18A | 72600232 | 0 |
| CEU | chr16 | CLEC18A | 72650232 | 0 |
| CEU | chr16 | CLEC18A | 72700232 | 0 |
| CEU | chr16 | CLEC18A | 72750232 | 0 |
| CEU | chr16 | CLEC18A | 72800232 | 0 |
| CEU | chr16 | CLEC18A | 72850232 | 0 |
| CEU | chr16 | CLEC18A | 72900232 | 0 |
| CEU | chr16 | CLEC18A | 72950232 | 0 |
| CEU | chr16 | CLEC18A | 73000232 | 0 |
| CEU | chr16 | CLEC18A | 73050232 | 0 |
| CEU | chr16 | CLEC18A | 73100232 | 0 |
| CEU | chr16 | CLEC18A | 73150232 | 0 |
| CEU | chr16 | CLEC18A | 73200232 | 0 |
| CEU | chr16 | CLEC18A | 73250232 | 0 |
| CEU | chr16 | CLEC18A | 73300232 | 0 |
| CEU | chr16 | CLEC18A | 73350232 | 0 |
| CEU | chr16 | CLEC18A | 73400232 | 0 |
| CEU | chr16 | CLEC18A | 73450232 | 0 |
| CEU | chr16 | CLEC18A | 73500232 | 0 |
| CEU | chr16 | CLEC18A | 73550232 | 0 |
| CEU | chr16 | CLEC18A | 73600232 | 0 |
| CEU | chr16 | CLEC18A | 73650232 | 0 |
| CEU | chr16 | CLEC18A | 73700232 | 0 |
| CEU | chr16 | CLEC18A | 73750232 | 0 |
| CEU | chr16 | CLEC18A | 73800232 | 0 |
| CEU | chr16 | CLEC18A | 73850232 | 0 |
| CEU | chr16 | CLEC18A | 73900232 | 0 |
| CEU | chr16 | CLEC18A | 73950232 | 0 |
| CEU | chr16 | CLEC18A | 74000232 | 0 |
| CEU | chr16 | CLEC18A | 74050232 | 0 |
| CEU | chr16 | CLEC18A | 74100232 | 0 |
| CEU | chr16 | CLEC18A | 74150232 | 0 |
| CEU | chr16 | CLEC18A | 74200232 | 0 |



### 3\_Introgression\_data

|     |       |         |           |   |
|-----|-------|---------|-----------|---|
| CEU | chr16 | CLEC18A | 74250232  | 0 |
| CEU | chr16 | CLEC18A | 74300232  | 0 |
| CEU | chr16 | CLEC18A | 74350232  | 0 |
| CEU | chr16 | CLEC18A | 74400232  | 0 |
| CEU | chr16 | CLEC18A | 74450232  | 0 |
| CEU | chr16 | CLEC18A | 74500232  | 0 |
| CEU | chr16 | CLEC18A | 74550232  | 0 |
| CEU | chr16 | CLEC18A | 74600232  | 0 |
| CEU | chr16 | CLEC18A | 74650232  | 0 |
| CEU | chr16 | CLEC18A | 74700232  | 0 |
| CEU | chr16 | CLEC18A | 74750232  | 0 |
| CEU | chr16 | CLEC18A | 74800232  | 0 |
| CEU | chr16 | CLEC18A | 74850232  | 0 |
| CEU | chr16 | CLEC18A | 74900232  | 0 |
| CEU | chr7  | CSH     | 118813708 | 0 |
| CEU | chr7  | CSH     | 118863708 | 0 |
| CEU | chr7  | CSH     | 118913708 | 0 |
| CEU | chr7  | CSH     | 118963708 | 0 |
| CEU | chr7  | CSH     | 119013708 | 0 |
| CEU | chr7  | CSH     | 119063708 | 0 |
| CEU | chr7  | CSH     | 119113708 | 0 |
| CEU | chr7  | CSH     | 119163708 | 0 |
| CEU | chr7  | CSH     | 119213708 | 0 |
| CEU | chr7  | CSH     | 119263708 | 0 |
| CEU | chr7  | CSH     | 119313708 | 0 |
| CEU | chr7  | CSH     | 119363708 | 0 |
| CEU | chr7  | CSH     | 119413708 | 0 |
| CEU | chr7  | CSH     | 119463708 | 0 |
| CEU | chr7  | CSH     | 119513708 | 0 |
| CEU | chr7  | CSH     | 119563708 | 0 |
| CEU | chr7  | CSH     | 119613708 | 0 |
| CEU | chr7  | CSH     | 119663708 | 0 |
| CEU | chr7  | CSH     | 119713708 | 0 |
| CEU | chr7  | CSH     | 119763708 | 0 |
| CEU | chr7  | CSH     | 119813708 | 0 |
| CEU | chr7  | CSH     | 119863708 | 0 |
| CEU | chr7  | CSH     | 119913708 | 0 |
| CEU | chr7  | CSH     | 119963708 | 0 |
| CEU | chr7  | CSH     | 120013708 | 0 |
| CEU | chr7  | CSH     | 120063708 | 0 |
| CEU | chr7  | CSH     | 120113708 | 0 |
| CEU | chr7  | CSH     | 120163708 | 0 |
| CEU | chr7  | CSH     | 120213708 | 0 |
| CEU | chr7  | CSH     | 120263708 | 0 |
| CEU | chr7  | CSH     | 120313708 | 0 |
| CEU | chr7  | CSH     | 120363708 | 0 |
| CEU | chr7  | CSH     | 120413708 | 0 |
| CEU | chr7  | CSH     | 120463708 | 0 |
| CEU | chr7  | CSH     | 120513708 | 0 |

### 3\_Introgression\_data

|     |      |     |           |   |
|-----|------|-----|-----------|---|
| CEU | chr7 | CSH | 120563708 | 0 |
| CEU | chr7 | CSH | 120613708 | 0 |
| CEU | chr7 | CSH | 120663708 | 0 |
| CEU | chr7 | CSH | 120713708 | 0 |
| CEU | chr7 | CSH | 120763708 | 0 |
| CEU | chr7 | CSH | 120813708 | 0 |
| CEU | chr7 | CSH | 120863708 | 0 |
| CEU | chr7 | CSH | 120913708 | 0 |
| CEU | chr7 | CSH | 120963708 | 0 |
| CEU | chr7 | CSH | 121013708 | 0 |
| CEU | chr7 | CSH | 121063708 | 0 |
| CEU | chr7 | CSH | 121113708 | 0 |
| CEU | chr7 | CSH | 121163708 | 0 |
| CEU | chr7 | CSH | 121213708 | 0 |
| CEU | chr7 | CSH | 121263708 | 0 |
| CEU | chr7 | CSH | 121313708 | 0 |
| CEU | chr7 | CSH | 121363708 | 0 |
| CEU | chr7 | CSH | 121413708 | 0 |
| CEU | chr7 | CSH | 121463708 | 0 |
| CEU | chr7 | CSH | 121513708 | 0 |
| CEU | chr7 | CSH | 121563708 | 0 |
| CEU | chr7 | CSH | 121613708 | 0 |
| CEU | chr7 | CSH | 121663708 | 0 |
| CEU | chr7 | CSH | 121713708 | 0 |
| CEU | chr7 | CSH | 121763708 | 0 |
| CEU | chr7 | CSH | 121813708 | 0 |
| CEU | chr7 | CSH | 121863708 | 0 |
| CEU | chr7 | CSH | 121913708 | 0 |
| CEU | chr7 | CSH | 121963708 | 0 |
| CEU | chr7 | CSH | 122013708 | 0 |
| CEU | chr7 | CSH | 122063708 | 0 |
| CEU | chr7 | CSH | 122113708 | 0 |
| CEU | chr7 | CSH | 122163708 | 0 |
| CEU | chr7 | CSH | 122213708 | 0 |
| CEU | chr7 | CSH | 122263708 | 0 |
| CEU | chr7 | CSH | 122313708 | 0 |
| CEU | chr7 | CSH | 122363708 | 0 |
| CEU | chr7 | CSH | 122413708 | 0 |
| CEU | chr7 | CSH | 122463708 | 0 |
| CEU | chr7 | CSH | 122513708 | 0 |
| CEU | chr7 | CSH | 122563708 | 0 |
| CEU | chr7 | CSH | 122613708 | 0 |
| CEU | chr7 | CSH | 122663708 | 0 |
| CEU | chr7 | CSH | 122713708 | 0 |
| CEU | chr7 | CSH | 122763708 | 0 |
| CEU | chr7 | CSH | 122813708 | 0 |
| CEU | chr7 | CSH | 122863708 | 0 |
| CEU | chr7 | CSH | 122913708 | 0 |
| CEU | chr7 | CSH | 122963708 | 0 |

## 3\_Introgression\_data

|     |      |     |           |   |
|-----|------|-----|-----------|---|
| CEU | chr7 | CSH | 123013708 | 0 |
| CEU | chr7 | CSH | 123063708 | 0 |
| CEU | chr7 | CSH | 123113708 | 0 |
| CEU | chr7 | CSH | 123163708 | 0 |
| CEU | chr7 | CSH | 123213708 | 0 |
| CEU | chr7 | CSH | 123263708 | 0 |
| CEU | chr7 | CSH | 123313708 | 0 |
| CEU | chr7 | CSH | 123363708 | 0 |
| CEU | chr7 | CSH | 123413708 | 0 |
| CEU | chr7 | CSH | 123463708 | 0 |
| CEU | chr7 | CSH | 123513708 | 0 |
| CEU | chr7 | CSH | 123563708 | 0 |
| CEU | chr7 | CSH | 123613708 | 0 |
| CEU | chr7 | CSH | 123663708 | 0 |
| CEU | chr7 | CSH | 123713708 | 0 |
| CEU | chr7 | CSH | 123763708 | 0 |
| CEU | chr7 | CSH | 123813708 | 0 |
| CEU | chr7 | CSH | 123863708 | 0 |
| CEU | chr7 | CSH | 123913708 | 0 |
| CEU | chr7 | CSH | 123963708 | 0 |
| CEU | chr7 | CSH | 124013708 | 0 |
| CEU | chr7 | CSH | 124063708 | 0 |
| CEU | chr7 | CSH | 124113708 | 0 |
| CEU | chr7 | CSH | 124163708 | 0 |
| CEU | chr7 | CSH | 124213708 | 0 |
| CEU | chr7 | CSH | 124263708 | 0 |
| CEU | chr7 | CSH | 124313708 | 0 |
| CEU | chr7 | CSH | 124363708 | 0 |
| CEU | chr7 | CSH | 124413708 | 0 |
| CEU | chr7 | CSH | 124463708 | 0 |
| CEU | chr7 | CSH | 124513708 | 0 |
| CEU | chr7 | CSH | 124563708 | 0 |
| CEU | chr7 | CSH | 124613708 | 0 |
| CEU | chr7 | CSH | 124663708 | 0 |
| CEU | chr7 | CSH | 124713708 | 0 |
| CEU | chr7 | CSH | 124763708 | 0 |
| CEU | chr7 | CSH | 124813708 | 0 |
| CEU | chr7 | CSH | 124863708 | 0 |
| CEU | chr7 | CSH | 124913708 | 0 |
| CEU | chr7 | CSH | 124963708 | 0 |
| CEU | chr7 | CSH | 125013708 | 0 |
| CEU | chr7 | CSH | 125063708 | 0 |
| CEU | chr7 | CSH | 125113708 | 0 |
| CEU | chr7 | CSH | 125163708 | 0 |
| CEU | chr7 | CSH | 125213708 | 0 |
| CEU | chr7 | CSH | 125263708 | 0 |
| CEU | chr7 | CSH | 125313708 | 0 |
| CEU | chr7 | CSH | 125363708 | 0 |
| CEU | chr7 | CSH | 125413708 | 0 |

## 3\_Introgression\_data

|     |      |     |           |   |
|-----|------|-----|-----------|---|
| CEU | chr7 | CSH | 125463708 | 0 |
| CEU | chr7 | CSH | 125513708 | 0 |
| CEU | chr7 | CSH | 125563708 | 0 |
| CEU | chr7 | CSH | 125613708 | 0 |
| CEU | chr7 | CSH | 125663708 | 0 |
| CEU | chr7 | CSH | 125713708 | 0 |
| CEU | chr7 | CSH | 125763708 | 0 |
| CEU | chr7 | CSH | 125813708 | 0 |
| CEU | chr7 | CSH | 125863708 | 0 |
| CEU | chr7 | CSH | 125913708 | 0 |
| CEU | chr7 | CSH | 125963708 | 0 |
| CEU | chr7 | CSH | 126013708 | 0 |
| CEU | chr7 | CSH | 126063708 | 0 |
| CEU | chr7 | CSH | 126113708 | 0 |
| CEU | chr7 | CSH | 126163708 | 0 |
| CEU | chr7 | CSH | 126213708 | 0 |
| CEU | chr7 | CSH | 126263708 | 0 |
| CEU | chr7 | CSH | 126313708 | 0 |
| CEU | chr7 | CSH | 126363708 | 0 |
| CEU | chr7 | CSH | 126413708 | 0 |
| CEU | chr7 | CSH | 126463708 | 0 |
| CEU | chr7 | CSH | 126513708 | 0 |
| CEU | chr7 | CSH | 126563708 | 0 |
| CEU | chr7 | CSH | 126613708 | 0 |
| CEU | chr7 | CSH | 126663708 | 0 |
| CEU | chr7 | CSH | 126713708 | 0 |
| CEU | chr7 | CSH | 126763708 | 0 |
| CEU | chr7 | CSH | 126813708 | 0 |
| CEU | chr7 | CSH | 126863708 | 0 |
| CEU | chr7 | CSH | 126913708 | 0 |
| CEU | chr7 | CSH | 126963708 | 0 |
| CEU | chr7 | CSH | 127013708 | 0 |
| CEU | chr7 | CSH | 127063708 | 0 |
| CEU | chr7 | CSH | 127113708 | 0 |
| CEU | chr7 | CSH | 127163708 | 0 |
| CEU | chr7 | CSH | 127213708 | 0 |
| CEU | chr7 | CSH | 127263708 | 0 |
| CEU | chr7 | CSH | 127313708 | 0 |
| CEU | chr7 | CSH | 127363708 | 0 |
| CEU | chr7 | CSH | 127413708 | 0 |
| CEU | chr7 | CSH | 127463708 | 0 |
| CEU | chr7 | CSH | 127513708 | 0 |
| CEU | chr7 | CSH | 127563708 | 0 |
| CEU | chr7 | CSH | 127613708 | 0 |
| CEU | chr7 | CSH | 127663708 | 0 |
| CEU | chr7 | CSH | 127713708 | 0 |
| CEU | chr7 | CSH | 127763708 | 0 |
| CEU | chr7 | CSH | 127813708 | 0 |
| CEU | chr7 | CSH | 127863708 | 0 |

### 3\_Introgression\_data

|     |       |     |           |    |
|-----|-------|-----|-----------|----|
| CEU | chr7  | CSH | 127913708 | 0  |
| CEU | chr7  | CSH | 127963708 | 9  |
| CEU | chr7  | CSH | 128013708 | 30 |
| CEU | chr7  | CSH | 128063708 | 45 |
| CEU | chr7  | CSH | 128113708 | 47 |
| CEU | chr7  | CSH | 128163708 | 44 |
| CEU | chr7  | CSH | 128213708 | 31 |
| CEU | chr7  | CSH | 128263708 | 34 |
| CEU | chr7  | CSH | 128313708 | 48 |
| CEU | chr7  | CSH | 128363708 | 27 |
| CEU | chr7  | CSH | 128413708 | 3  |
| CEU | chr7  | CSH | 128463708 | 0  |
| CEU | chr7  | CSH | 128513708 | 0  |
| CEU | chr7  | CSH | 128563708 | 0  |
| CEU | chr7  | CSH | 128613708 | 0  |
| CEU | chr7  | CSH | 128663708 | 0  |
| CEU | chr7  | CSH | 128713708 | 0  |
| CEU | chr7  | CSH | 128763708 | 0  |
| CEU | chr7  | CSH | 128813708 | 0  |
| CEU | chr16 | CSH | 76131945  | 0  |
| CEU | chr16 | CSH | 76181945  | 0  |
| CEU | chr16 | CSH | 76231945  | 0  |
| CEU | chr16 | CSH | 76281945  | 0  |
| CEU | chr16 | CSH | 76331945  | 0  |
| CEU | chr16 | CSH | 76381945  | 0  |
| CEU | chr16 | CSH | 76431945  | 0  |
| CEU | chr16 | CSH | 76481945  | 4  |
| CEU | chr16 | CSH | 76531945  | 22 |
| CEU | chr16 | CSH | 76581945  | 29 |
| CEU | chr16 | CSH | 76631945  | 22 |
| CEU | chr16 | CSH | 76681945  | 28 |
| CEU | chr16 | CSH | 76731945  | 30 |
| CEU | chr16 | CSH | 76781945  | 24 |
| CEU | chr16 | CSH | 76831945  | 51 |
| CEU | chr16 | CSH | 76881945  | 58 |
| CEU | chr16 | CSH | 76931945  | 39 |
| CEU | chr16 | CSH | 76981945  | 37 |
| CEU | chr16 | CSH | 77031945  | 26 |
| CEU | chr16 | CSH | 77081945  | 22 |
| CEU | chr16 | CSH | 77131945  | 55 |
| CEU | chr16 | CSH | 77181945  | 60 |
| CEU | chr16 | CSH | 77231945  | 25 |
| CEU | chr16 | CSH | 77281945  | 56 |
| CEU | chr16 | CSH | 77331945  | 95 |
| CEU | chr16 | CSH | 77381945  | 83 |
| CEU | chr16 | CSH | 77431945  | 53 |
| CEU | chr16 | CSH | 77481945  | 26 |
| CEU | chr16 | CSH | 77531945  | 41 |
| CEU | chr16 | CSH | 77581945  | 60 |

## 3\_Introgression\_data

|     |       |     |          |     |
|-----|-------|-----|----------|-----|
| CEU | chr16 | CSH | 77631945 | 45  |
| CEU | chr16 | CSH | 77681945 | 26  |
| CEU | chr16 | CSH | 77731945 | 20  |
| CEU | chr16 | CSH | 77781945 | 22  |
| CEU | chr16 | CSH | 77831945 | 24  |
| CEU | chr16 | CSH | 77881945 | 16  |
| CEU | chr16 | CSH | 77931945 | 18  |
| CEU | chr16 | CSH | 77981945 | 36  |
| CEU | chr16 | CSH | 78031945 | 41  |
| CEU | chr16 | CSH | 78081945 | 104 |
| CEU | chr16 | CSH | 78131945 | 113 |
| CEU | chr16 | CSH | 78181945 | 69  |
| CEU | chr16 | CSH | 78231945 | 63  |
| CEU | chr16 | CSH | 78281945 | 35  |
| CEU | chr16 | CSH | 78331945 | 36  |
| CEU | chr16 | CSH | 78381945 | 95  |
| CEU | chr16 | CSH | 78431945 | 75  |
| CEU | chr16 | CSH | 78481945 | 9   |
| CEU | chr16 | CSH | 78531945 | 19  |
| CEU | chr16 | CSH | 78581945 | 19  |
| CEU | chr16 | CSH | 78631945 | 26  |
| CEU | chr16 | CSH | 78681945 | 101 |
| CEU | chr16 | CSH | 78731945 | 113 |
| CEU | chr16 | CSH | 78781945 | 41  |
| CEU | chr16 | CSH | 78831945 | 50  |
| CEU | chr16 | CSH | 78881945 | 70  |
| CEU | chr16 | CSH | 78931945 | 38  |
| CEU | chr16 | CSH | 78981945 | 10  |
| CEU | chr16 | CSH | 79031945 | 0   |
| CEU | chr16 | CSH | 79081945 | 0   |
| CEU | chr16 | CSH | 79131945 | 0   |
| CEU | chr16 | CSH | 79181945 | 0   |
| CEU | chr16 | CSH | 79231945 | 0   |
| CEU | chr16 | CSH | 79281945 | 0   |
| CEU | chr16 | CSH | 79331945 | 0   |
| CEU | chr16 | CSH | 79381945 | 0   |
| CEU | chr16 | CSH | 79431945 | 0   |
| CEU | chr16 | CSH | 79481945 | 0   |
| CEU | chr16 | CSH | 79531945 | 0   |
| CEU | chr16 | CSH | 79581945 | 0   |
| CEU | chr16 | CSH | 79631945 | 0   |
| CEU | chr16 | CSH | 79681945 | 0   |
| CEU | chr16 | CSH | 79731945 | 0   |
| CEU | chr16 | CSH | 79781945 | 0   |
| CEU | chr16 | CSH | 79831945 | 0   |
| CEU | chr16 | CSH | 79881945 | 0   |
| CEU | chr16 | CSH | 79931945 | 0   |
| CEU | chr16 | CSH | 79981945 | 0   |
| CEU | chr16 | CSH | 80031945 | 0   |

3\_Introgression\_data

|     |       |     |          |    |
|-----|-------|-----|----------|----|
| CEU | chr16 | CSH | 80081945 | 0  |
| CEU | chr16 | CSH | 80131945 | 0  |
| CEU | chr16 | CSH | 80181945 | 0  |
| CEU | chr16 | CSH | 80231945 | 0  |
| CEU | chr16 | CSH | 80281945 | 0  |
| CEU | chr16 | CSH | 80331945 | 0  |
| CEU | chr16 | CSH | 80381945 | 5  |
| CEU | chr16 | CSH | 80431945 | 31 |
| CEU | chr16 | CSH | 80481945 | 70 |
| CEU | chr16 | CSH | 80531945 | 61 |
| CEU | chr16 | CSH | 80581945 | 17 |
| CEU | chr16 | CSH | 80631945 | 0  |
| CEU | chr16 | CSH | 80681945 | 0  |
| CEU | chr16 | CSH | 80731945 | 0  |
| CEU | chr16 | CSH | 80781945 | 0  |
| CEU | chr16 | CSH | 80831945 | 0  |
| CEU | chr16 | CSH | 80881945 | 0  |
| CEU | chr16 | CSH | 80931945 | 0  |
| CEU | chr16 | CSH | 80981945 | 0  |
| CEU | chr16 | CSH | 81031945 | 0  |
| CEU | chr16 | CSH | 81081945 | 0  |
| CEU | chr16 | CSH | 81131945 | 0  |
| CEU | chr16 | CSH | 81181945 | 0  |
| CEU | chr16 | CSH | 81231945 | 0  |
| CEU | chr16 | CSH | 81281945 | 0  |
| CEU | chr16 | CSH | 81331945 | 0  |
| CEU | chr16 | CSH | 81381945 | 0  |
| CEU | chr16 | CSH | 81431945 | 0  |
| CEU | chr16 | CSH | 81481945 | 0  |
| CEU | chr16 | CSH | 81531945 | 0  |
| CEU | chr16 | CSH | 81581945 | 0  |
| CEU | chr16 | CSH | 81631945 | 0  |
| CEU | chr16 | CSH | 81681945 | 0  |
| CEU | chr16 | CSH | 81731945 | 0  |
| CEU | chr16 | CSH | 81781945 | 0  |
| CEU | chr16 | CSH | 81831945 | 0  |
| CEU | chr16 | CSH | 81881945 | 0  |
| CEU | chr16 | CSH | 81931945 | 0  |
| CEU | chr16 | CSH | 81981945 | 0  |
| CEU | chr16 | CSH | 82031945 | 0  |
| CEU | chr16 | CSH | 82081945 | 0  |
| CEU | chr16 | CSH | 82131945 | 0  |
| CEU | chr16 | CSH | 82181945 | 0  |
| CEU | chr16 | CSH | 82231945 | 0  |
| CEU | chr16 | CSH | 82281945 | 10 |
| CEU | chr16 | CSH | 82331945 | 36 |
| CEU | chr16 | CSH | 82381945 | 47 |
| CEU | chr16 | CSH | 82431945 | 21 |
| CEU | chr16 | CSH | 82481945 | 0  |

## 3\_Introgression\_data

|     |       |     |          |    |
|-----|-------|-----|----------|----|
| CEU | chr16 | CSH | 82531945 | 31 |
| CEU | chr16 | CSH | 82581945 | 58 |
| CEU | chr16 | CSH | 82631945 | 27 |
| CEU | chr16 | CSH | 82681945 | 0  |
| CEU | chr16 | CSH | 82731945 | 0  |
| CEU | chr16 | CSH | 82781945 | 0  |
| CEU | chr16 | CSH | 82831945 | 0  |
| CEU | chr16 | CSH | 82881945 | 0  |
| CEU | chr16 | CSH | 82931945 | 0  |
| CEU | chr16 | CSH | 82981945 | 0  |
| CEU | chr16 | CSH | 83031945 | 0  |
| CEU | chr16 | CSH | 83081945 | 21 |
| CEU | chr16 | CSH | 83131945 | 34 |
| CEU | chr16 | CSH | 83181945 | 21 |
| CEU | chr16 | CSH | 83231945 | 26 |
| CEU | chr16 | CSH | 83281945 | 42 |
| CEU | chr16 | CSH | 83331945 | 49 |
| CEU | chr16 | CSH | 83381945 | 75 |
| CEU | chr16 | CSH | 83431945 | 77 |
| CEU | chr16 | CSH | 83481945 | 27 |
| CEU | chr16 | CSH | 83531945 | 0  |
| CEU | chr16 | CSH | 83581945 | 0  |
| CEU | chr16 | CSH | 83631945 | 0  |
| CEU | chr16 | CSH | 83681945 | 0  |
| CEU | chr16 | CSH | 83731945 | 0  |
| CEU | chr16 | CSH | 83781945 | 30 |
| CEU | chr16 | CSH | 83831945 | 69 |
| CEU | chr16 | CSH | 83881945 | 51 |
| CEU | chr16 | CSH | 83931945 | 37 |
| CEU | chr16 | CSH | 83981945 | 49 |
| CEU | chr16 | CSH | 84031945 | 51 |
| CEU | chr16 | CSH | 84081945 | 27 |
| CEU | chr16 | CSH | 84131945 | 0  |
| CEU | chr16 | CSH | 84181945 | 0  |
| CEU | chr16 | CSH | 84231945 | 0  |
| CEU | chr16 | CSH | 84281945 | 0  |
| CEU | chr16 | CSH | 84331945 | 0  |
| CEU | chr16 | CSH | 84381945 | 0  |
| CEU | chr16 | CSH | 84431945 | 0  |
| CEU | chr16 | CSH | 84481945 | 0  |
| CEU | chr16 | CSH | 84531945 | 0  |
| CEU | chr16 | CSH | 84581945 | 0  |
| CEU | chr16 | CSH | 84631945 | 0  |
| CEU | chr16 | CSH | 84681945 | 0  |
| CEU | chr16 | CSH | 84731945 | 0  |
| CEU | chr16 | CSH | 84781945 | 0  |
| CEU | chr16 | CSH | 84831945 | 0  |
| CEU | chr16 | CSH | 84881945 | 0  |
| CEU | chr16 | CSH | 84931945 | 0  |



## 3\_Introgression\_data

|     |       |     |          |    |
|-----|-------|-----|----------|----|
| CEU | chr16 | CSH | 84981945 | 0  |
| CEU | chr16 | CSH | 85031945 | 0  |
| CEU | chr16 | CSH | 85081945 | 0  |
| CEU | chr16 | CSH | 85131945 | 0  |
| CEU | chr16 | CSH | 85181945 | 7  |
| CEU | chr16 | CSH | 85231945 | 42 |
| CEU | chr16 | CSH | 85281945 | 37 |
| CEU | chr16 | CSH | 85331945 | 2  |
| CEU | chr16 | CSH | 85381945 | 0  |
| CEU | chr16 | CSH | 85431945 | 0  |
| CEU | chr16 | CSH | 85481945 | 0  |
| CEU | chr16 | CSH | 85531945 | 0  |
| CEU | chr16 | CSH | 85581945 | 0  |
| CEU | chr16 | CSH | 85631945 | 0  |
| CEU | chr16 | CSH | 85681945 | 0  |
| CEU | chr16 | CSH | 85731945 | 0  |
| CEU | chr16 | CSH | 85781945 | 0  |
| CEU | chr16 | CSH | 85831945 | 0  |
| CEU | chr16 | CSH | 85881945 | 0  |
| CEU | chr16 | CSH | 85931945 | 0  |
| CEU | chr16 | CSH | 85981945 | 0  |
| CEU | chr16 | CSH | 86031945 | 0  |
| CEU | chr17 | CSH | 13377873 | 0  |
| CEU | chr17 | CSH | 13427873 | 0  |
| CEU | chr17 | CSH | 13477873 | 0  |
| CEU | chr17 | CSH | 13527873 | 0  |
| CEU | chr17 | CSH | 13577873 | 0  |
| CEU | chr17 | CSH | 13627873 | 0  |
| CEU | chr17 | CSH | 13677873 | 0  |
| CEU | chr17 | CSH | 13727873 | 0  |
| CEU | chr17 | CSH | 13777873 | 0  |
| CEU | chr17 | CSH | 13827873 | 0  |
| CEU | chr17 | CSH | 13877873 | 0  |
| CEU | chr17 | CSH | 13927873 | 0  |
| CEU | chr17 | CSH | 13977873 | 0  |
| CEU | chr17 | CSH | 14027873 | 0  |
| CEU | chr17 | CSH | 14077873 | 0  |
| CEU | chr17 | CSH | 14127873 | 0  |
| CEU | chr17 | CSH | 14177873 | 0  |
| CEU | chr17 | CSH | 14227873 | 0  |
| CEU | chr17 | CSH | 14277873 | 0  |
| CEU | chr17 | CSH | 14327873 | 0  |
| CEU | chr17 | CSH | 14377873 | 0  |
| CEU | chr17 | CSH | 14427873 | 0  |
| CEU | chr17 | CSH | 14477873 | 0  |
| CEU | chr17 | CSH | 14527873 | 0  |
| CEU | chr17 | CSH | 14577873 | 0  |
| CEU | chr17 | CSH | 14627873 | 0  |
| CEU | chr17 | CSH | 14677873 | 0  |

## 3\_Introgression\_data

|     |       |     |          |    |
|-----|-------|-----|----------|----|
| CEU | chr17 | CSH | 14727873 | 0  |
| CEU | chr17 | CSH | 14777873 | 0  |
| CEU | chr17 | CSH | 14827873 | 10 |
| CEU | chr17 | CSH | 14877873 | 34 |
| CEU | chr17 | CSH | 14927873 | 54 |
| CEU | chr17 | CSH | 14977873 | 78 |
| CEU | chr17 | CSH | 15027873 | 48 |
| CEU | chr17 | CSH | 15077873 | 0  |
| CEU | chr17 | CSH | 15127873 | 0  |
| CEU | chr17 | CSH | 15177873 | 0  |
| CEU | chr17 | CSH | 15227873 | 0  |
| CEU | chr17 | CSH | 15277873 | 0  |
| CEU | chr17 | CSH | 15327873 | 0  |
| CEU | chr17 | CSH | 15377873 | 0  |
| CEU | chr17 | CSH | 15427873 | 0  |
| CEU | chr17 | CSH | 15477873 | 0  |
| CEU | chr17 | CSH | 15527873 | 0  |
| CEU | chr17 | CSH | 15577873 | 0  |
| CEU | chr17 | CSH | 15627873 | 0  |
| CEU | chr17 | CSH | 15677873 | 0  |
| CEU | chr17 | CSH | 15727873 | 0  |
| CEU | chr17 | CSH | 15777873 | 0  |
| CEU | chr17 | CSH | 15827873 | 0  |
| CEU | chr17 | CSH | 15877873 | 0  |
| CEU | chr17 | CSH | 15927873 | 0  |
| CEU | chr17 | CSH | 15977873 | 0  |
| CEU | chr17 | CSH | 16027873 | 0  |
| CEU | chr17 | CSH | 16077873 | 0  |
| CEU | chr17 | CSH | 16127873 | 0  |
| CEU | chr17 | CSH | 16177873 | 0  |
| CEU | chr17 | CSH | 16227873 | 0  |
| CEU | chr17 | CSH | 16277873 | 0  |
| CEU | chr17 | CSH | 16327873 | 0  |
| CEU | chr17 | CSH | 16377873 | 0  |
| CEU | chr17 | CSH | 16427873 | 0  |
| CEU | chr17 | CSH | 16477873 | 0  |
| CEU | chr17 | CSH | 16527873 | 0  |
| CEU | chr17 | CSH | 16577873 | 0  |
| CEU | chr17 | CSH | 16627873 | 0  |
| CEU | chr17 | CSH | 16677873 | 0  |
| CEU | chr17 | CSH | 16727873 | 0  |
| CEU | chr17 | CSH | 16777873 | 0  |
| CEU | chr17 | CSH | 16827873 | 0  |
| CEU | chr17 | CSH | 16877873 | 0  |
| CEU | chr17 | CSH | 16927873 | 0  |
| CEU | chr17 | CSH | 16977873 | 0  |
| CEU | chr17 | CSH | 17027873 | 0  |
| CEU | chr17 | CSH | 17077873 | 0  |
| CEU | chr17 | CSH | 17127873 | 0  |

## 3\_Introgression\_data

|     |       |     |          |   |
|-----|-------|-----|----------|---|
| CEU | chr17 | CSH | 17177873 | 0 |
| CEU | chr17 | CSH | 17227873 | 0 |
| CEU | chr17 | CSH | 17277873 | 0 |
| CEU | chr17 | CSH | 17327873 | 0 |
| CEU | chr17 | CSH | 17377873 | 0 |
| CEU | chr17 | CSH | 17427873 | 0 |
| CEU | chr17 | CSH | 17477873 | 0 |
| CEU | chr17 | CSH | 17527873 | 0 |
| CEU | chr17 | CSH | 17577873 | 0 |
| CEU | chr17 | CSH | 17627873 | 0 |
| CEU | chr17 | CSH | 17677873 | 0 |
| CEU | chr17 | CSH | 17727873 | 0 |
| CEU | chr17 | CSH | 17777873 | 0 |
| CEU | chr17 | CSH | 17827873 | 0 |
| CEU | chr17 | CSH | 17877873 | 0 |
| CEU | chr17 | CSH | 17927873 | 0 |
| CEU | chr17 | CSH | 17977873 | 0 |
| CEU | chr17 | CSH | 18027873 | 0 |
| CEU | chr17 | CSH | 18077873 | 0 |
| CEU | chr17 | CSH | 18127873 | 0 |
| CEU | chr17 | CSH | 18177873 | 0 |
| CEU | chr17 | CSH | 18227873 | 0 |
| CEU | chr17 | CSH | 18277873 | 0 |
| CEU | chr17 | CSH | 18327873 | 0 |
| CEU | chr17 | CSH | 18377873 | 0 |
| CEU | chr17 | CSH | 18427873 | 0 |
| CEU | chr17 | CSH | 18477873 | 0 |
| CEU | chr17 | CSH | 18527873 | 0 |
| CEU | chr17 | CSH | 18577873 | 0 |
| CEU | chr17 | CSH | 18627873 | 0 |
| CEU | chr17 | CSH | 18677873 | 0 |
| CEU | chr17 | CSH | 18727873 | 0 |
| CEU | chr17 | CSH | 18777873 | 0 |
| CEU | chr17 | CSH | 18827873 | 0 |
| CEU | chr17 | CSH | 18877873 | 0 |
| CEU | chr17 | CSH | 18927873 | 0 |
| CEU | chr17 | CSH | 18977873 | 0 |
| CEU | chr17 | CSH | 19027873 | 0 |
| CEU | chr17 | CSH | 19077873 | 0 |
| CEU | chr17 | CSH | 19127873 | 0 |
| CEU | chr17 | CSH | 19177873 | 0 |
| CEU | chr17 | CSH | 19227873 | 0 |
| CEU | chr17 | CSH | 19277873 | 0 |
| CEU | chr17 | CSH | 19327873 | 0 |
| CEU | chr17 | CSH | 19377873 | 0 |
| CEU | chr17 | CSH | 19427873 | 0 |
| CEU | chr17 | CSH | 19477873 | 0 |
| CEU | chr17 | CSH | 19527873 | 0 |
| CEU | chr17 | CSH | 19577873 | 0 |

## 3\_Introgression\_data

|     |       |     |          |   |
|-----|-------|-----|----------|---|
| CEU | chr17 | CSH | 19627873 | 0 |
| CEU | chr17 | CSH | 19677873 | 0 |
| CEU | chr17 | CSH | 19727873 | 0 |
| CEU | chr17 | CSH | 19777873 | 0 |
| CEU | chr17 | CSH | 19827873 | 0 |
| CEU | chr17 | CSH | 19877873 | 0 |
| CEU | chr17 | CSH | 19927873 | 0 |
| CEU | chr17 | CSH | 19977873 | 0 |
| CEU | chr17 | CSH | 20027873 | 0 |
| CEU | chr17 | CSH | 20077873 | 0 |
| CEU | chr17 | CSH | 20127873 | 0 |
| CEU | chr17 | CSH | 20177873 | 0 |
| CEU | chr17 | CSH | 20227873 | 0 |
| CEU | chr17 | CSH | 20277873 | 0 |
| CEU | chr17 | CSH | 20327873 | 0 |
| CEU | chr17 | CSH | 20377873 | 0 |
| CEU | chr17 | CSH | 20427873 | 0 |
| CEU | chr17 | CSH | 20477873 | 0 |
| CEU | chr17 | CSH | 20527873 | 0 |
| CEU | chr17 | CSH | 20577873 | 0 |
| CEU | chr17 | CSH | 20627873 | 0 |
| CEU | chr17 | CSH | 20677873 | 0 |
| CEU | chr17 | CSH | 20727873 | 0 |
| CEU | chr17 | CSH | 20777873 | 0 |
| CEU | chr17 | CSH | 20827873 | 0 |
| CEU | chr17 | CSH | 20877873 | 0 |
| CEU | chr17 | CSH | 20927873 | 0 |
| CEU | chr17 | CSH | 20977873 | 0 |
| CEU | chr17 | CSH | 21027873 | 0 |
| CEU | chr17 | CSH | 21077873 | 0 |
| CEU | chr17 | CSH | 21127873 | 0 |
| CEU | chr17 | CSH | 21177873 | 0 |
| CEU | chr17 | CSH | 21227873 | 0 |
| CEU | chr17 | CSH | 21277873 | 0 |
| CEU | chr17 | CSH | 21327873 | 0 |
| CEU | chr17 | CSH | 21377873 | 0 |
| CEU | chr17 | CSH | 21427873 | 0 |
| CEU | chr17 | CSH | 21477873 | 0 |
| CEU | chr17 | CSH | 21527873 | 0 |
| CEU | chr17 | CSH | 21577873 | 0 |
| CEU | chr17 | CSH | 21627873 | 0 |
| CEU | chr17 | CSH | 21677873 | 0 |
| CEU | chr17 | CSH | 21727873 | 0 |
| CEU | chr17 | CSH | 21777873 | 0 |
| CEU | chr17 | CSH | 21827873 | 0 |
| CEU | chr17 | CSH | 21877873 | 0 |
| CEU | chr17 | CSH | 21927873 | 0 |
| CEU | chr17 | CSH | 21977873 | 0 |
| CEU | chr17 | CSH | 22027873 | 0 |

## 3\_Introgression\_data

|     |       |     |          |   |
|-----|-------|-----|----------|---|
| CEU | chr17 | CSH | 22077873 | 0 |
| CEU | chr17 | CSH | 22127873 | 0 |
| CEU | chr17 | CSH | 22177873 | 0 |
| CEU | chr17 | CSH | 22227873 | 0 |
| CEU | chr17 | CSH | 22277873 | 0 |
| CEU | chr17 | CSH | 22327873 | 0 |
| CEU | chr17 | CSH | 22377873 | 0 |
| CEU | chr17 | CSH | 22427873 | 0 |
| CEU | chr17 | CSH | 22477873 | 0 |
| CEU | chr17 | CSH | 22527873 | 0 |
| CEU | chr17 | CSH | 22577873 | 0 |
| CEU | chr17 | CSH | 22627873 | 0 |
| CEU | chr17 | CSH | 22677873 | 0 |
| CEU | chr17 | CSH | 22727873 | 0 |
| CEU | chr17 | CSH | 22777873 | 0 |
| CEU | chr17 | CSH | 22827873 | 0 |
| CEU | chr17 | CSH | 22877873 | 0 |
| CEU | chr17 | CSH | 22927873 | 0 |
| CEU | chr17 | CSH | 22977873 | 0 |
| CEU | chr17 | CSH | 23027873 | 0 |
| CEU | chr17 | CSH | 23077873 | 0 |
| CEU | chr17 | CSH | 23127873 | 0 |
| CEU | chr17 | CSH | 23177873 | 0 |
| CEU | chr17 | CSH | 23227873 | 0 |
| CEU | chr17 | CSH | 23277873 | 0 |
| CEU | chr17 | CSH | 58922012 | 0 |
| CEU | chr17 | CSH | 58972012 | 0 |
| CEU | chr17 | CSH | 59022012 | 0 |
| CEU | chr17 | CSH | 59072012 | 0 |
| CEU | chr17 | CSH | 59122012 | 0 |
| CEU | chr17 | CSH | 59172012 | 0 |
| CEU | chr17 | CSH | 59222012 | 0 |
| CEU | chr17 | CSH | 59272012 | 0 |
| CEU | chr17 | CSH | 59322012 | 0 |
| CEU | chr17 | CSH | 59372012 | 0 |
| CEU | chr17 | CSH | 59422012 | 0 |
| CEU | chr17 | CSH | 59472012 | 0 |
| CEU | chr17 | CSH | 59522012 | 0 |
| CEU | chr17 | CSH | 59572012 | 0 |
| CEU | chr17 | CSH | 59622012 | 0 |
| CEU | chr17 | CSH | 59672012 | 0 |
| CEU | chr17 | CSH | 59722012 | 0 |
| CEU | chr17 | CSH | 59772012 | 0 |
| CEU | chr17 | CSH | 59822012 | 0 |
| CEU | chr17 | CSH | 59872012 | 0 |
| CEU | chr17 | CSH | 59922012 | 0 |
| CEU | chr17 | CSH | 59972012 | 0 |
| CEU | chr17 | CSH | 60022012 | 0 |
| CEU | chr17 | CSH | 60072012 | 0 |

## 3\_Introgression\_data

|     |       |     |          |   |
|-----|-------|-----|----------|---|
| CEU | chr17 | CSH | 60122012 | 0 |
| CEU | chr17 | CSH | 60172012 | 0 |
| CEU | chr17 | CSH | 60222012 | 0 |
| CEU | chr17 | CSH | 60272012 | 0 |
| CEU | chr17 | CSH | 60322012 | 0 |
| CEU | chr17 | CSH | 60372012 | 0 |
| CEU | chr17 | CSH | 60422012 | 0 |
| CEU | chr17 | CSH | 60472012 | 0 |
| CEU | chr17 | CSH | 60522012 | 0 |
| CEU | chr17 | CSH | 60572012 | 0 |
| CEU | chr17 | CSH | 60622012 | 0 |
| CEU | chr17 | CSH | 60672012 | 0 |
| CEU | chr17 | CSH | 60722012 | 0 |
| CEU | chr17 | CSH | 60772012 | 0 |
| CEU | chr17 | CSH | 60822012 | 0 |
| CEU | chr17 | CSH | 60872012 | 0 |
| CEU | chr17 | CSH | 60922012 | 0 |
| CEU | chr17 | CSH | 60972012 | 0 |
| CEU | chr17 | CSH | 61022012 | 0 |
| CEU | chr17 | CSH | 61072012 | 0 |
| CEU | chr17 | CSH | 61122012 | 0 |
| CEU | chr17 | CSH | 61172012 | 0 |
| CEU | chr17 | CSH | 61222012 | 0 |
| CEU | chr17 | CSH | 61272012 | 0 |
| CEU | chr17 | CSH | 61322012 | 0 |
| CEU | chr17 | CSH | 61372012 | 0 |
| CEU | chr17 | CSH | 61422012 | 0 |
| CEU | chr17 | CSH | 61472012 | 0 |
| CEU | chr17 | CSH | 61522012 | 0 |
| CEU | chr17 | CSH | 61572012 | 0 |
| CEU | chr17 | CSH | 61622012 | 0 |
| CEU | chr17 | CSH | 61672012 | 0 |
| CEU | chr17 | CSH | 61722012 | 0 |
| CEU | chr17 | CSH | 61772012 | 0 |
| CEU | chr17 | CSH | 61822012 | 0 |
| CEU | chr17 | CSH | 61872012 | 0 |
| CEU | chr17 | CSH | 61922012 | 0 |
| CEU | chr17 | CSH | 61972012 | 0 |
| CEU | chr17 | CSH | 62022012 | 0 |
| CEU | chr17 | CSH | 62072012 | 0 |
| CEU | chr17 | CSH | 62122012 | 0 |
| CEU | chr17 | CSH | 62172012 | 0 |
| CEU | chr17 | CSH | 62222012 | 0 |
| CEU | chr17 | CSH | 62272012 | 0 |
| CEU | chr17 | CSH | 62322012 | 0 |
| CEU | chr17 | CSH | 62372012 | 0 |
| CEU | chr17 | CSH | 62422012 | 0 |
| CEU | chr17 | CSH | 62472012 | 0 |
| CEU | chr17 | CSH | 62522012 | 0 |

3\_Introgression\_data

|     |       |     |          |   |
|-----|-------|-----|----------|---|
| CEU | chr17 | CSH | 62572012 | 0 |
| CEU | chr17 | CSH | 62622012 | 0 |
| CEU | chr17 | CSH | 62672012 | 0 |
| CEU | chr17 | CSH | 62722012 | 0 |
| CEU | chr17 | CSH | 62772012 | 0 |
| CEU | chr17 | CSH | 62822012 | 0 |
| CEU | chr17 | CSH | 62872012 | 0 |
| CEU | chr17 | CSH | 62922012 | 0 |
| CEU | chr17 | CSH | 62972012 | 0 |
| CEU | chr17 | CSH | 63022012 | 0 |
| CEU | chr17 | CSH | 63072012 | 0 |
| CEU | chr17 | CSH | 63122012 | 0 |
| CEU | chr17 | CSH | 63172012 | 0 |
| CEU | chr17 | CSH | 63222012 | 0 |
| CEU | chr17 | CSH | 63272012 | 0 |
| CEU | chr17 | CSH | 63322012 | 0 |
| CEU | chr17 | CSH | 63372012 | 0 |
| CEU | chr17 | CSH | 63422012 | 0 |
| CEU | chr17 | CSH | 63472012 | 0 |
| CEU | chr17 | CSH | 63522012 | 0 |
| CEU | chr17 | CSH | 63572012 | 0 |
| CEU | chr17 | CSH | 63622012 | 0 |
| CEU | chr17 | CSH | 63672012 | 0 |
| CEU | chr17 | CSH | 63722012 | 0 |
| CEU | chr17 | CSH | 63772012 | 0 |
| CEU | chr17 | CSH | 63822012 | 0 |
| CEU | chr17 | CSH | 63872012 | 0 |
| CEU | chr17 | CSH | 63922012 | 0 |
| CEU | chr17 | CSH | 63972012 | 0 |
| CEU | chr17 | CSH | 64022012 | 0 |
| CEU | chr17 | CSH | 64072012 | 0 |
| CEU | chr17 | CSH | 64122012 | 0 |
| CEU | chr17 | CSH | 64172012 | 0 |
| CEU | chr17 | CSH | 64222012 | 0 |
| CEU | chr17 | CSH | 64272012 | 0 |
| CEU | chr17 | CSH | 64322012 | 0 |
| CEU | chr17 | CSH | 64372012 | 0 |
| CEU | chr17 | CSH | 64422012 | 0 |
| CEU | chr17 | CSH | 64472012 | 0 |
| CEU | chr17 | CSH | 64522012 | 0 |
| CEU | chr17 | CSH | 64572012 | 0 |
| CEU | chr17 | CSH | 64622012 | 0 |
| CEU | chr17 | CSH | 64672012 | 0 |
| CEU | chr17 | CSH | 64722012 | 0 |
| CEU | chr17 | CSH | 64772012 | 0 |
| CEU | chr17 | CSH | 64822012 | 0 |
| CEU | chr17 | CSH | 64872012 | 0 |
| CEU | chr17 | CSH | 64922012 | 0 |
| CEU | chr17 | CSH | 64972012 | 0 |

## 3\_Introgression\_data

|     |       |     |          |    |
|-----|-------|-----|----------|----|
| CEU | chr17 | CSH | 65022012 | 0  |
| CEU | chr17 | CSH | 65072012 | 0  |
| CEU | chr17 | CSH | 65122012 | 0  |
| CEU | chr17 | CSH | 65172012 | 0  |
| CEU | chr17 | CSH | 65222012 | 0  |
| CEU | chr17 | CSH | 65272012 | 0  |
| CEU | chr17 | CSH | 65322012 | 0  |
| CEU | chr17 | CSH | 65372012 | 0  |
| CEU | chr17 | CSH | 65422012 | 3  |
| CEU | chr17 | CSH | 65472012 | 29 |
| CEU | chr17 | CSH | 65522012 | 53 |
| CEU | chr17 | CSH | 65572012 | 44 |
| CEU | chr17 | CSH | 65622012 | 17 |
| CEU | chr17 | CSH | 65672012 | 0  |
| CEU | chr17 | CSH | 65722012 | 0  |
| CEU | chr17 | CSH | 65772012 | 0  |
| CEU | chr17 | CSH | 65822012 | 0  |
| CEU | chr17 | CSH | 65872012 | 0  |
| CEU | chr17 | CSH | 65922012 | 0  |
| CEU | chr17 | CSH | 65972012 | 0  |
| CEU | chr17 | CSH | 66022012 | 0  |
| CEU | chr17 | CSH | 66072012 | 0  |
| CEU | chr17 | CSH | 66122012 | 0  |
| CEU | chr17 | CSH | 66172012 | 0  |
| CEU | chr17 | CSH | 66222012 | 0  |
| CEU | chr17 | CSH | 66272012 | 0  |
| CEU | chr17 | CSH | 66322012 | 0  |
| CEU | chr17 | CSH | 66372012 | 0  |
| CEU | chr17 | CSH | 66422012 | 0  |
| CEU | chr17 | CSH | 66472012 | 0  |
| CEU | chr17 | CSH | 66522012 | 0  |
| CEU | chr17 | CSH | 66572012 | 0  |
| CEU | chr17 | CSH | 66622012 | 0  |
| CEU | chr17 | CSH | 66672012 | 0  |
| CEU | chr17 | CSH | 66722012 | 0  |
| CEU | chr17 | CSH | 66772012 | 0  |
| CEU | chr17 | CSH | 66822012 | 0  |
| CEU | chr17 | CSH | 66872012 | 0  |
| CEU | chr17 | CSH | 66922012 | 0  |
| CEU | chr17 | CSH | 66972012 | 0  |
| CEU | chr17 | CSH | 67022012 | 0  |
| CEU | chr17 | CSH | 67072012 | 0  |
| CEU | chr17 | CSH | 67122012 | 0  |
| CEU | chr17 | CSH | 67172012 | 0  |
| CEU | chr17 | CSH | 67222012 | 0  |
| CEU | chr17 | CSH | 67272012 | 0  |
| CEU | chr17 | CSH | 67322012 | 0  |
| CEU | chr17 | CSH | 67372012 | 0  |
| CEU | chr17 | CSH | 67422012 | 0  |



### 3\_Introgression\_data

|     |       |     |          |    |
|-----|-------|-----|----------|----|
| CEU | chr17 | CSH | 67472012 | 0  |
| CEU | chr17 | CSH | 67522012 | 0  |
| CEU | chr17 | CSH | 67572012 | 0  |
| CEU | chr17 | CSH | 67622012 | 0  |
| CEU | chr17 | CSH | 67672012 | 0  |
| CEU | chr17 | CSH | 67722012 | 0  |
| CEU | chr17 | CSH | 67772012 | 0  |
| CEU | chr17 | CSH | 67822012 | 0  |
| CEU | chr17 | CSH | 67872012 | 0  |
| CEU | chr17 | CSH | 67922012 | 0  |
| CEU | chr17 | CSH | 67972012 | 0  |
| CEU | chr17 | CSH | 68022012 | 0  |
| CEU | chr17 | CSH | 68072012 | 0  |
| CEU | chr17 | CSH | 68122012 | 0  |
| CEU | chr17 | CSH | 68172012 | 0  |
| CEU | chr17 | CSH | 68222012 | 0  |
| CEU | chr17 | CSH | 68272012 | 0  |
| CEU | chr17 | CSH | 68322012 | 0  |
| CEU | chr17 | CSH | 68372012 | 0  |
| CEU | chr17 | CSH | 68422012 | 0  |
| CEU | chr17 | CSH | 68472012 | 0  |
| CEU | chr17 | CSH | 68522012 | 0  |
| CEU | chr17 | CSH | 68572012 | 0  |
| CEU | chr17 | CSH | 68622012 | 0  |
| CEU | chr17 | CSH | 68672012 | 0  |
| CEU | chr17 | CSH | 68722012 | 0  |
| CEU | chr17 | CSH | 68772012 | 0  |
| CEU | chr17 | CSH | 68822012 | 0  |
| CEU | chr19 | CSH | 6485290  | 0  |
| CEU | chr19 | CSH | 6535290  | 0  |
| CEU | chr19 | CSH | 6585290  | 0  |
| CEU | chr19 | CSH | 6635290  | 0  |
| CEU | chr19 | CSH | 6685290  | 0  |
| CEU | chr19 | CSH | 6735290  | 0  |
| CEU | chr19 | CSH | 6785290  | 0  |
| CEU | chr19 | CSH | 6835290  | 38 |
| CEU | chr19 | CSH | 6885290  | 41 |
| CEU | chr19 | CSH | 6935290  | 3  |
| CEU | chr19 | CSH | 6985290  | 0  |
| CEU | chr19 | CSH | 7035290  | 0  |
| CEU | chr19 | CSH | 7085290  | 2  |
| CEU | chr19 | CSH | 7135290  | 27 |
| CEU | chr19 | CSH | 7185290  | 25 |
| CEU | chr19 | CSH | 7235290  | 0  |
| CEU | chr19 | CSH | 7285290  | 0  |
| CEU | chr19 | CSH | 7335290  | 0  |
| CEU | chr19 | CSH | 7385290  | 0  |
| CEU | chr19 | CSH | 7435290  | 0  |
| CEU | chr19 | CSH | 7485290  | 0  |

3\_Introgression\_data

|     |       |     |         |    |
|-----|-------|-----|---------|----|
| CEU | chr19 | CSH | 7535290 | 0  |
| CEU | chr19 | CSH | 7585290 | 0  |
| CEU | chr19 | CSH | 7635290 | 0  |
| CEU | chr19 | CSH | 7685290 | 0  |
| CEU | chr19 | CSH | 7735290 | 0  |
| CEU | chr19 | CSH | 7785290 | 0  |
| CEU | chr19 | CSH | 7835290 | 0  |
| CEU | chr19 | CSH | 7885290 | 0  |
| CEU | chr19 | CSH | 7935290 | 0  |
| CEU | chr19 | CSH | 7985290 | 0  |
| CEU | chr19 | CSH | 8035290 | 0  |
| CEU | chr19 | CSH | 8085290 | 6  |
| CEU | chr19 | CSH | 8135290 | 30 |
| CEU | chr19 | CSH | 8185290 | 42 |
| CEU | chr19 | CSH | 8235290 | 29 |
| CEU | chr19 | CSH | 8285290 | 11 |
| CEU | chr19 | CSH | 8335290 | 0  |
| CEU | chr19 | CSH | 8385290 | 0  |
| CEU | chr19 | CSH | 8435290 | 0  |
| CEU | chr19 | CSH | 8485290 | 0  |
| CEU | chr19 | CSH | 8535290 | 0  |
| CEU | chr19 | CSH | 8585290 | 0  |
| CEU | chr19 | CSH | 8635290 | 0  |
| CEU | chr19 | CSH | 8685290 | 0  |
| CEU | chr19 | CSH | 8735290 | 0  |
| CEU | chr19 | CSH | 8785290 | 0  |
| CEU | chr19 | CSH | 8835290 | 0  |
| CEU | chr19 | CSH | 8885290 | 0  |
| CEU | chr19 | CSH | 8935290 | 0  |
| CEU | chr19 | CSH | 8985290 | 0  |
| CEU | chr19 | CSH | 9035290 | 0  |
| CEU | chr19 | CSH | 9085290 | 0  |
| CEU | chr19 | CSH | 9135290 | 0  |
| CEU | chr19 | CSH | 9185290 | 0  |
| CEU | chr19 | CSH | 9235290 | 0  |
| CEU | chr19 | CSH | 9285290 | 0  |
| CEU | chr19 | CSH | 9335290 | 0  |
| CEU | chr19 | CSH | 9385290 | 0  |
| CEU | chr19 | CSH | 9435290 | 0  |
| CEU | chr19 | CSH | 9485290 | 0  |
| CEU | chr19 | CSH | 9535290 | 0  |
| CEU | chr19 | CSH | 9585290 | 0  |
| CEU | chr19 | CSH | 9635290 | 0  |
| CEU | chr19 | CSH | 9685290 | 0  |
| CEU | chr19 | CSH | 9735290 | 0  |
| CEU | chr19 | CSH | 9785290 | 0  |
| CEU | chr19 | CSH | 9835290 | 0  |
| CEU | chr19 | CSH | 9885290 | 0  |
| CEU | chr19 | CSH | 9935290 | 0  |

### 3\_Introgression\_data

|     |       |     |          |    |
|-----|-------|-----|----------|----|
| CEU | chr19 | CSH | 9985290  | 0  |
| CEU | chr19 | CSH | 10035290 | 7  |
| CEU | chr19 | CSH | 10085290 | 27 |
| CEU | chr19 | CSH | 10135290 | 20 |
| CEU | chr19 | CSH | 10185290 | 19 |
| CEU | chr19 | CSH | 10235290 | 55 |
| CEU | chr19 | CSH | 10285290 | 63 |
| CEU | chr19 | CSH | 10335290 | 40 |
| CEU | chr19 | CSH | 10385290 | 13 |
| CEU | chr19 | CSH | 10435290 | 0  |
| CEU | chr19 | CSH | 10485290 | 0  |
| CEU | chr19 | CSH | 10535290 | 0  |
| CEU | chr19 | CSH | 10585290 | 0  |
| CEU | chr19 | CSH | 10635290 | 0  |
| CEU | chr19 | CSH | 10685290 | 0  |
| CEU | chr19 | CSH | 10735290 | 0  |
| CEU | chr19 | CSH | 10785290 | 0  |
| CEU | chr19 | CSH | 10835290 | 0  |
| CEU | chr19 | CSH | 10885290 | 0  |
| CEU | chr19 | CSH | 10935290 | 0  |
| CEU | chr19 | CSH | 10985290 | 0  |
| CEU | chr19 | CSH | 11035290 | 0  |
| CEU | chr19 | CSH | 11085290 | 0  |
| CEU | chr19 | CSH | 11135290 | 0  |
| CEU | chr19 | CSH | 11185290 | 0  |
| CEU | chr19 | CSH | 11235290 | 0  |
| CEU | chr19 | CSH | 11285290 | 0  |
| CEU | chr19 | CSH | 11335290 | 0  |
| CEU | chr19 | CSH | 11385290 | 0  |
| CEU | chr19 | CSH | 11435290 | 0  |
| CEU | chr19 | CSH | 11485290 | 0  |
| CEU | chr19 | CSH | 11535290 | 0  |
| CEU | chr19 | CSH | 11585290 | 0  |
| CEU | chr19 | CSH | 11635290 | 0  |
| CEU | chr19 | CSH | 11685290 | 14 |
| CEU | chr19 | CSH | 11735290 | 30 |
| CEU | chr19 | CSH | 11785290 | 40 |
| CEU | chr19 | CSH | 11835290 | 29 |
| CEU | chr19 | CSH | 11885290 | 5  |
| CEU | chr19 | CSH | 11935290 | 0  |
| CEU | chr19 | CSH | 11985290 | 0  |
| CEU | chr19 | CSH | 12035290 | 0  |
| CEU | chr19 | CSH | 12085290 | 0  |
| CEU | chr19 | CSH | 12135290 | 0  |
| CEU | chr19 | CSH | 12185290 | 0  |
| CEU | chr19 | CSH | 12235290 | 0  |
| CEU | chr19 | CSH | 12285290 | 0  |
| CEU | chr19 | CSH | 12335290 | 0  |
| CEU | chr19 | CSH | 12385290 | 0  |

## 3\_Introgression\_data

|     |       |     |          |   |
|-----|-------|-----|----------|---|
| CEU | chr19 | CSH | 12435290 | 0 |
| CEU | chr19 | CSH | 12485290 | 0 |
| CEU | chr19 | CSH | 12535290 | 0 |
| CEU | chr19 | CSH | 12585290 | 0 |
| CEU | chr19 | CSH | 12635290 | 0 |
| CEU | chr19 | CSH | 12685290 | 0 |
| CEU | chr19 | CSH | 12735290 | 0 |
| CEU | chr19 | CSH | 12785290 | 0 |
| CEU | chr19 | CSH | 12835290 | 0 |
| CEU | chr19 | CSH | 12885290 | 0 |
| CEU | chr19 | CSH | 12935290 | 0 |
| CEU | chr19 | CSH | 12985290 | 0 |
| CEU | chr19 | CSH | 13035290 | 0 |
| CEU | chr19 | CSH | 13085290 | 0 |
| CEU | chr19 | CSH | 13135290 | 0 |
| CEU | chr19 | CSH | 13185290 | 0 |
| CEU | chr19 | CSH | 13235290 | 0 |
| CEU | chr19 | CSH | 13285290 | 0 |
| CEU | chr19 | CSH | 13335290 | 0 |
| CEU | chr19 | CSH | 13385290 | 0 |
| CEU | chr19 | CSH | 13435290 | 0 |
| CEU | chr19 | CSH | 13485290 | 0 |
| CEU | chr19 | CSH | 13535290 | 0 |
| CEU | chr19 | CSH | 13585290 | 0 |
| CEU | chr19 | CSH | 13635290 | 0 |
| CEU | chr19 | CSH | 13685290 | 0 |
| CEU | chr19 | CSH | 13735290 | 0 |
| CEU | chr19 | CSH | 13785290 | 0 |
| CEU | chr19 | CSH | 13835290 | 0 |
| CEU | chr19 | CSH | 13885290 | 0 |
| CEU | chr19 | CSH | 13935290 | 0 |
| CEU | chr19 | CSH | 13985290 | 0 |
| CEU | chr19 | CSH | 14035290 | 0 |
| CEU | chr19 | CSH | 14085290 | 0 |
| CEU | chr19 | CSH | 14135290 | 0 |
| CEU | chr19 | CSH | 14185290 | 0 |
| CEU | chr19 | CSH | 14235290 | 0 |
| CEU | chr19 | CSH | 14285290 | 0 |
| CEU | chr19 | CSH | 14335290 | 0 |
| CEU | chr19 | CSH | 14385290 | 0 |
| CEU | chr19 | CSH | 14435290 | 0 |
| CEU | chr19 | CSH | 14485290 | 0 |
| CEU | chr19 | CSH | 14535290 | 0 |
| CEU | chr19 | CSH | 14585290 | 0 |
| CEU | chr19 | CSH | 14635290 | 0 |
| CEU | chr19 | CSH | 14685290 | 0 |
| CEU | chr19 | CSH | 14735290 | 0 |
| CEU | chr19 | CSH | 14785290 | 0 |
| CEU | chr19 | CSH | 14835290 | 0 |

### 3\_Introgression\_data

|     |       |     |          |    |
|-----|-------|-----|----------|----|
| CEU | chr19 | CSH | 14885290 | 0  |
| CEU | chr19 | CSH | 14935290 | 0  |
| CEU | chr19 | CSH | 14985290 | 0  |
| CEU | chr19 | CSH | 15035290 | 0  |
| CEU | chr19 | CSH | 15085290 | 0  |
| CEU | chr19 | CSH | 15135290 | 0  |
| CEU | chr19 | CSH | 15185290 | 0  |
| CEU | chr19 | CSH | 15235290 | 0  |
| CEU | chr19 | CSH | 15285290 | 0  |
| CEU | chr19 | CSH | 15335290 | 0  |
| CEU | chr19 | CSH | 15385290 | 0  |
| CEU | chr19 | CSH | 15435290 | 0  |
| CEU | chr19 | CSH | 15485290 | 0  |
| CEU | chr19 | CSH | 15535290 | 0  |
| CEU | chr19 | CSH | 15585290 | 0  |
| CEU | chr19 | CSH | 15635290 | 0  |
| CEU | chr19 | CSH | 15685290 | 0  |
| CEU | chr19 | CSH | 15735290 | 0  |
| CEU | chr19 | CSH | 15785290 | 0  |
| CEU | chr19 | CSH | 15835290 | 0  |
| CEU | chr19 | CSH | 15885290 | 0  |
| CEU | chr19 | CSH | 15935290 | 0  |
| CEU | chr19 | CSH | 15985290 | 0  |
| CEU | chr19 | CSH | 16035290 | 0  |
| CEU | chr19 | CSH | 16085290 | 0  |
| CEU | chr19 | CSH | 16135290 | 0  |
| CEU | chr19 | CSH | 16185290 | 0  |
| CEU | chr19 | CSH | 16235290 | 0  |
| CEU | chr19 | CSH | 16285290 | 0  |
| CEU | chr19 | CSH | 16335290 | 0  |
| CEU | chr19 | CSH | 16385290 | 0  |
| CEU | chr19 | CSH | 53548333 | 0  |
| CEU | chr19 | CSH | 53598333 | 0  |
| CEU | chr19 | CSH | 53648333 | 0  |
| CEU | chr19 | CSH | 53698333 | 0  |
| CEU | chr19 | CSH | 53748333 | 0  |
| CEU | chr19 | CSH | 53798333 | 0  |
| CEU | chr19 | CSH | 53848333 | 0  |
| CEU | chr19 | CSH | 53898333 | 0  |
| CEU | chr19 | CSH | 53948333 | 18 |
| CEU | chr19 | CSH | 53998333 | 40 |
| CEU | chr19 | CSH | 54048333 | 22 |
| CEU | chr19 | CSH | 54098333 | 0  |
| CEU | chr19 | CSH | 54148333 | 0  |
| CEU | chr19 | CSH | 54198333 | 0  |
| CEU | chr19 | CSH | 54248333 | 0  |
| CEU | chr19 | CSH | 54298333 | 0  |
| CEU | chr19 | CSH | 54348333 | 0  |
| CEU | chr19 | CSH | 54398333 | 0  |

## 3\_Introgression\_data

|     |       |     |          |    |
|-----|-------|-----|----------|----|
| CEU | chr19 | CSH | 54448333 | 0  |
| CEU | chr19 | CSH | 54498333 | 3  |
| CEU | chr19 | CSH | 54548333 | 61 |
| CEU | chr19 | CSH | 54598333 | 58 |
| CEU | chr19 | CSH | 54648333 | 0  |
| CEU | chr19 | CSH | 54698333 | 0  |
| CEU | chr19 | CSH | 54748333 | 44 |
| CEU | chr19 | CSH | 54798333 | 44 |
| CEU | chr19 | CSH | 54848333 | 8  |
| CEU | chr19 | CSH | 54898333 | 35 |
| CEU | chr19 | CSH | 54948333 | 27 |
| CEU | chr19 | CSH | 54998333 | 0  |
| CEU | chr19 | CSH | 55048333 | 23 |
| CEU | chr19 | CSH | 55098333 | 86 |
| CEU | chr19 | CSH | 55148333 | 74 |
| CEU | chr19 | CSH | 55198333 | 11 |
| CEU | chr19 | CSH | 55248333 | 0  |
| CEU | chr19 | CSH | 55298333 | 0  |
| CEU | chr19 | CSH | 55348333 | 0  |
| CEU | chr19 | CSH | 55398333 | 0  |
| CEU | chr19 | CSH | 55448333 | 0  |
| CEU | chr19 | CSH | 55498333 | 0  |
| CEU | chr19 | CSH | 55548333 | 0  |
| CEU | chr19 | CSH | 55598333 | 0  |
| CEU | chr19 | CSH | 55648333 | 0  |
| CEU | chr19 | CSH | 55698333 | 0  |
| CEU | chr19 | CSH | 55748333 | 0  |
| CEU | chr19 | CSH | 55798333 | 0  |
| CEU | chr19 | CSH | 55848333 | 0  |
| CEU | chr19 | CSH | 55898333 | 0  |
| CEU | chr19 | CSH | 55948333 | 0  |
| CEU | chr19 | CSH | 55998333 | 0  |
| CEU | chr19 | CSH | 56048333 | 12 |
| CEU | chr19 | CSH | 56098333 | 26 |
| CEU | chr19 | CSH | 56148333 | 39 |
| CEU | chr19 | CSH | 56198333 | 51 |
| CEU | chr19 | CSH | 56248333 | 26 |
| CEU | chr19 | CSH | 56298333 | 0  |
| CEU | chr19 | CSH | 56348333 | 0  |
| CEU | chr19 | CSH | 56398333 | 0  |
| CEU | chr19 | CSH | 56448333 | 0  |
| CEU | chr19 | CSH | 56498333 | 0  |
| CEU | chr19 | CSH | 56548333 | 0  |
| CEU | chr19 | CSH | 56598333 | 0  |
| CEU | chr19 | CSH | 56648333 | 25 |
| CEU | chr19 | CSH | 56698333 | 54 |
| CEU | chr19 | CSH | 56748333 | 29 |
| CEU | chr19 | CSH | 56798333 | 0  |
| CEU | chr19 | CSH | 56848333 | 0  |

## 3\_Introgression\_data

|     |       |     |          |   |
|-----|-------|-----|----------|---|
| CEU | chr19 | CSH | 56898333 | 0 |
| CEU | chr19 | CSH | 56948333 | 0 |
| CEU | chr19 | CSH | 56998333 | 0 |
| CEU | chr19 | CSH | 57048333 | 0 |
| CEU | chr19 | CSH | 57098333 | 0 |
| CEU | chr19 | CSH | 57148333 | 0 |
| CEU | chr19 | CSH | 57198333 | 0 |
| CEU | chr19 | CSH | 57248333 | 0 |
| CEU | chr19 | CSH | 57298333 | 0 |
| CEU | chr19 | CSH | 57348333 | 0 |
| CEU | chr19 | CSH | 57398333 | 0 |
| CEU | chr19 | CSH | 57448333 | 0 |
| CEU | chr19 | CSH | 57498333 | 0 |
| CEU | chr19 | CSH | 57548333 | 0 |
| CEU | chr19 | CSH | 57598333 | 0 |
| CEU | chr19 | CSH | 57648333 | 0 |
| CEU | chr19 | CSH | 57698333 | 0 |
| CEU | chr19 | CSH | 57748333 | 0 |
| CEU | chr19 | CSH | 57798333 | 0 |
| CEU | chr19 | CSH | 57848333 | 0 |
| CEU | chr19 | CSH | 57898333 | 0 |
| CEU | chr19 | CSH | 57948333 | 0 |
| CEU | chr19 | CSH | 57998333 | 0 |
| CEU | chr19 | CSH | 58048333 | 0 |
| CEU | chr19 | CSH | 58098333 | 0 |
| CEU | chr19 | CSH | 58148333 | 0 |
| CEU | chr19 | CSH | 58198333 | 0 |
| CEU | chr19 | CSH | 58248333 | 0 |
| CEU | chr19 | CSH | 58298333 | 0 |
| CEU | chr19 | CSH | 58348333 | 0 |
| CEU | chr19 | CSH | 58398333 | 0 |
| CEU | chr19 | CSH | 58448333 | 0 |
| CEU | chr19 | CSH | 58498333 | 0 |
| CEU | chr19 | CSH | 58548333 | 0 |
| CEU | chr19 | CSH | 58598333 | 0 |
| CEU | chr19 | CSH | 58648333 | 0 |
| CEU | chr19 | CSH | 58698333 | 0 |
| CEU | chr19 | CSH | 58748333 | 0 |
| CEU | chr19 | CSH | 58798333 | 0 |
| CEU | chr19 | CSH | 58848333 | 0 |
| CEU | chr19 | CSH | 58898333 | 0 |
| CEU | chr19 | CSH | 58948333 | 0 |
| CEU | chr19 | CSH | 58998333 | 0 |
| CEU | chr19 | CSH | 59048333 | 0 |
| CEU | chr19 | CSH | 59098333 | 0 |
| CEU | chr19 | CSH | 59148333 | 0 |
| CEU | chr19 | CSH | 59198333 | 0 |
| CEU | chr19 | CSH | 59248333 | 0 |
| CEU | chr19 | CSH | 59298333 | 0 |

## 3\_Introgression\_data

|     |       |     |          |   |
|-----|-------|-----|----------|---|
| CEU | chr19 | CSH | 59348333 | 0 |
| CEU | chr19 | CSH | 59398333 | 0 |
| CEU | chr19 | CSH | 59448333 | 0 |
| CEU | chr19 | CSH | 59498333 | 0 |
| CEU | chr19 | CSH | 59548333 | 0 |
| CEU | chr19 | CSH | 59598333 | 0 |
| CEU | chr19 | CSH | 59648333 | 0 |
| CEU | chr19 | CSH | 59698333 | 0 |
| CEU | chr19 | CSH | 59748333 | 0 |
| CEU | chr19 | CSH | 59798333 | 0 |
| CEU | chr19 | CSH | 59848333 | 0 |
| CEU | chr19 | CSH | 59898333 | 0 |
| CEU | chr19 | CSH | 59948333 | 0 |
| CEU | chr19 | CSH | 59998333 | 0 |
| CEU | chr19 | CSH | 60048333 | 0 |
| CEU | chr19 | CSH | 60098333 | 0 |
| CEU | chr19 | CSH | 60148333 | 0 |
| CEU | chr19 | CSH | 60198333 | 0 |
| CEU | chr19 | CSH | 60248333 | 0 |
| CEU | chr19 | CSH | 60298333 | 0 |
| CEU | chr19 | CSH | 60348333 | 0 |
| CEU | chr19 | CSH | 60398333 | 0 |
| CEU | chr19 | CSH | 60448333 | 0 |
| CEU | chr19 | CSH | 60498333 | 0 |
| CEU | chr19 | CSH | 60548333 | 0 |
| CEU | chr19 | CSH | 60598333 | 0 |
| CEU | chr19 | CSH | 60648333 | 0 |
| CEU | chr19 | CSH | 60698333 | 0 |
| CEU | chr19 | CSH | 60748333 | 0 |
| CEU | chr19 | CSH | 60798333 | 0 |
| CEU | chr19 | CSH | 60848333 | 0 |
| CEU | chr19 | CSH | 60898333 | 0 |
| CEU | chr19 | CSH | 60948333 | 0 |
| CEU | chr19 | CSH | 60998333 | 0 |
| CEU | chr19 | CSH | 61048333 | 0 |
| CEU | chr19 | CSH | 61098333 | 0 |
| CEU | chr19 | CSH | 61148333 | 0 |
| CEU | chr19 | CSH | 61198333 | 0 |
| CEU | chr19 | CSH | 61248333 | 0 |
| CEU | chr19 | CSH | 61298333 | 0 |
| CEU | chr19 | CSH | 61348333 | 0 |
| CEU | chr19 | CSH | 61398333 | 0 |
| CEU | chr19 | CSH | 61448333 | 0 |
| CEU | chr19 | CSH | 61498333 | 0 |
| CEU | chr19 | CSH | 61548333 | 0 |
| CEU | chr19 | CSH | 61598333 | 0 |
| CEU | chr19 | CSH | 61648333 | 0 |
| CEU | chr19 | CSH | 61698333 | 0 |
| CEU | chr19 | CSH | 61748333 | 0 |



## 3\_Introgression\_data

|     |       |       |          |    |
|-----|-------|-------|----------|----|
| CEU | chr19 | CSH   | 61798333 | 0  |
| CEU | chr19 | CSH   | 61848333 | 0  |
| CEU | chr19 | CSH   | 61898333 | 0  |
| CEU | chr19 | CSH   | 61948333 | 0  |
| CEU | chr19 | CSH   | 61998333 | 0  |
| CEU | chr19 | CSH   | 62048333 | 0  |
| CEU | chr19 | CSH   | 62098333 | 0  |
| CEU | chr19 | CSH   | 62148333 | 0  |
| CEU | chr19 | CSH   | 62198333 | 0  |
| CEU | chr19 | CSH   | 62248333 | 0  |
| CEU | chr19 | CSH   | 62298333 | 0  |
| CEU | chr19 | CSH   | 62348333 | 0  |
| CEU | chr19 | CSH   | 62398333 | 0  |
| CEU | chr19 | CSH   | 62448333 | 0  |
| CEU | chr19 | CSH   | 62498333 | 0  |
| CEU | chr19 | CSH   | 62548333 | 0  |
| CEU | chr19 | CSH   | 62598333 | 0  |
| CEU | chr19 | CSH   | 62648333 | 0  |
| CEU | chr19 | CSH   | 62698333 | 0  |
| CEU | chr19 | CSH   | 62748333 | 0  |
| CEU | chr19 | CSH   | 62798333 | 0  |
| CEU | chr19 | CSH   | 62848333 | 0  |
| CEU | chr19 | CSH   | 62898333 | 0  |
| CEU | chr19 | CSH   | 62948333 | 0  |
| CEU | chr19 | CSH   | 62998333 | 0  |
| CEU | chr19 | CSH   | 63048333 | 0  |
| CEU | chr19 | CSH   | 63098333 | 0  |
| CEU | chr19 | CSH   | 63148333 | 0  |
| CEU | chr19 | CSH   | 63198333 | 0  |
| CEU | chr19 | CSH   | 63248333 | 0  |
| CEU | chr19 | CSH   | 63298333 | 0  |
| CEU | chr19 | CSH   | 63348333 | 0  |
| CEU | chr19 | CSH   | 63398333 | 0  |
| CEU | chr19 | CSH   | 63448333 | 0  |
| CEU | chr8  | DEFA1 | 2027649  | 43 |
| CEU | chr8  | DEFA1 | 2077649  | 36 |
| CEU | chr8  | DEFA1 | 2127649  | 51 |
| CEU | chr8  | DEFA1 | 2177649  | 60 |
| CEU | chr8  | DEFA1 | 2227649  | 41 |
| CEU | chr8  | DEFA1 | 2277649  | 41 |
| CEU | chr8  | DEFA1 | 2327649  | 33 |
| CEU | chr8  | DEFA1 | 2377649  | 19 |
| CEU | chr8  | DEFA1 | 2427649  | 14 |
| CEU | chr8  | DEFA1 | 2477649  | 13 |
| CEU | chr8  | DEFA1 | 2527649  | 20 |
| CEU | chr8  | DEFA1 | 2577649  | 30 |
| CEU | chr8  | DEFA1 | 2627649  | 45 |
| CEU | chr8  | DEFA1 | 2677649  | 44 |
| CEU | chr8  | DEFA1 | 2727649  | 40 |

### 3\_Introgression\_data

|     |      |       |         |     |
|-----|------|-------|---------|-----|
| CEU | chr8 | DEFA1 | 2777649 | 29  |
| CEU | chr8 | DEFA1 | 2827649 | 29  |
| CEU | chr8 | DEFA1 | 2877649 | 79  |
| CEU | chr8 | DEFA1 | 2927649 | 78  |
| CEU | chr8 | DEFA1 | 2977649 | 30  |
| CEU | chr8 | DEFA1 | 3027649 | 28  |
| CEU | chr8 | DEFA1 | 3077649 | 52  |
| CEU | chr8 | DEFA1 | 3127649 | 111 |
| CEU | chr8 | DEFA1 | 3177649 | 160 |
| CEU | chr8 | DEFA1 | 3227649 | 153 |
| CEU | chr8 | DEFA1 | 3277649 | 146 |
| CEU | chr8 | DEFA1 | 3327649 | 80  |
| CEU | chr8 | DEFA1 | 3377649 | 8   |
| CEU | chr8 | DEFA1 | 3427649 | 38  |
| CEU | chr8 | DEFA1 | 3477649 | 64  |
| CEU | chr8 | DEFA1 | 3527649 | 28  |
| CEU | chr8 | DEFA1 | 3577649 | 0   |
| CEU | chr8 | DEFA1 | 3627649 | 0   |
| CEU | chr8 | DEFA1 | 3677649 | 0   |
| CEU | chr8 | DEFA1 | 3727649 | 0   |
| CEU | chr8 | DEFA1 | 3777649 | 0   |
| CEU | chr8 | DEFA1 | 3827649 | 0   |
| CEU | chr8 | DEFA1 | 3877649 | 0   |
| CEU | chr8 | DEFA1 | 3927649 | 0   |
| CEU | chr8 | DEFA1 | 3977649 | 0   |
| CEU | chr8 | DEFA1 | 4027649 | 0   |
| CEU | chr8 | DEFA1 | 4077649 | 3   |
| CEU | chr8 | DEFA1 | 4127649 | 36  |
| CEU | chr8 | DEFA1 | 4177649 | 33  |
| CEU | chr8 | DEFA1 | 4227649 | 0   |
| CEU | chr8 | DEFA1 | 4277649 | 0   |
| CEU | chr8 | DEFA1 | 4327649 | 0   |
| CEU | chr8 | DEFA1 | 4377649 | 0   |
| CEU | chr8 | DEFA1 | 4427649 | 0   |
| CEU | chr8 | DEFA1 | 4477649 | 0   |
| CEU | chr8 | DEFA1 | 4527649 | 0   |
| CEU | chr8 | DEFA1 | 4577649 | 16  |
| CEU | chr8 | DEFA1 | 4627649 | 67  |
| CEU | chr8 | DEFA1 | 4677649 | 51  |
| CEU | chr8 | DEFA1 | 4727649 | 0   |
| CEU | chr8 | DEFA1 | 4777649 | 0   |
| CEU | chr8 | DEFA1 | 4827649 | 0   |
| CEU | chr8 | DEFA1 | 4877649 | 0   |
| CEU | chr8 | DEFA1 | 4927649 | 0   |
| CEU | chr8 | DEFA1 | 4977649 | 0   |
| CEU | chr8 | DEFA1 | 5027649 | 0   |
| CEU | chr8 | DEFA1 | 5077649 | 0   |
| CEU | chr8 | DEFA1 | 5127649 | 0   |
| CEU | chr8 | DEFA1 | 5177649 | 0   |

## 3\_Introgression\_data

|     |      |       |         |   |
|-----|------|-------|---------|---|
| CEU | chr8 | DEFA1 | 5227649 | 0 |
| CEU | chr8 | DEFA1 | 5277649 | 0 |
| CEU | chr8 | DEFA1 | 5327649 | 0 |
| CEU | chr8 | DEFA1 | 5377649 | 0 |
| CEU | chr8 | DEFA1 | 5427649 | 0 |
| CEU | chr8 | DEFA1 | 5477649 | 0 |
| CEU | chr8 | DEFA1 | 5527649 | 0 |
| CEU | chr8 | DEFA1 | 5577649 | 0 |
| CEU | chr8 | DEFA1 | 5627649 | 0 |
| CEU | chr8 | DEFA1 | 5677649 | 0 |
| CEU | chr8 | DEFA1 | 5727649 | 0 |
| CEU | chr8 | DEFA1 | 5777649 | 0 |
| CEU | chr8 | DEFA1 | 5827649 | 0 |
| CEU | chr8 | DEFA1 | 5877649 | 0 |
| CEU | chr8 | DEFA1 | 5927649 | 0 |
| CEU | chr8 | DEFA1 | 5977649 | 0 |
| CEU | chr8 | DEFA1 | 6027649 | 0 |
| CEU | chr8 | DEFA1 | 6077649 | 0 |
| CEU | chr8 | DEFA1 | 6127649 | 0 |
| CEU | chr8 | DEFA1 | 6177649 | 0 |
| CEU | chr8 | DEFA1 | 6227649 | 0 |
| CEU | chr8 | DEFA1 | 6277649 | 0 |
| CEU | chr8 | DEFA1 | 6327649 | 0 |
| CEU | chr8 | DEFA1 | 6377649 | 0 |
| CEU | chr8 | DEFA1 | 6427649 | 0 |
| CEU | chr8 | DEFA1 | 6477649 | 0 |
| CEU | chr8 | DEFA1 | 6527649 | 0 |
| CEU | chr8 | DEFA1 | 6577649 | 0 |
| CEU | chr8 | DEFA1 | 6627649 | 0 |
| CEU | chr8 | DEFA1 | 6677649 | 0 |
| CEU | chr8 | DEFA1 | 6727649 | 0 |
| CEU | chr8 | DEFA1 | 6777649 | 0 |
| CEU | chr8 | DEFA1 | 6827649 | 0 |
| CEU | chr8 | DEFA1 | 6877649 | 0 |
| CEU | chr8 | DEFA1 | 6927649 | 0 |
| CEU | chr8 | DEFA1 | 6977649 | 0 |
| CEU | chr8 | DEFA1 | 7027649 | 0 |
| CEU | chr8 | DEFA1 | 7077649 | 0 |
| CEU | chr8 | DEFA1 | 7127649 | 0 |
| CEU | chr8 | DEFA1 | 7177649 | 0 |
| CEU | chr8 | DEFA1 | 7227649 | 0 |
| CEU | chr8 | DEFA1 | 7277649 | 0 |
| CEU | chr8 | DEFA1 | 7327649 | 0 |
| CEU | chr8 | DEFA1 | 7377649 | 0 |
| CEU | chr8 | DEFA1 | 7427649 | 0 |
| CEU | chr8 | DEFA1 | 7477649 | 0 |
| CEU | chr8 | DEFA1 | 7527649 | 0 |
| CEU | chr8 | DEFA1 | 7577649 | 0 |
| CEU | chr8 | DEFA1 | 7627649 | 0 |

## 3\_Introgression\_data

|     |      |       |          |    |
|-----|------|-------|----------|----|
| CEU | chr8 | DEFA1 | 7677649  | 0  |
| CEU | chr8 | DEFA1 | 7727649  | 0  |
| CEU | chr8 | DEFA1 | 7777649  | 0  |
| CEU | chr8 | DEFA1 | 7827649  | 0  |
| CEU | chr8 | DEFA1 | 7877649  | 0  |
| CEU | chr8 | DEFA1 | 7927649  | 0  |
| CEU | chr8 | DEFA1 | 7977649  | 0  |
| CEU | chr8 | DEFA1 | 8027649  | 0  |
| CEU | chr8 | DEFA1 | 8077649  | 0  |
| CEU | chr8 | DEFA1 | 8127649  | 0  |
| CEU | chr8 | DEFA1 | 8177649  | 0  |
| CEU | chr8 | DEFA1 | 8227649  | 0  |
| CEU | chr8 | DEFA1 | 8277649  | 0  |
| CEU | chr8 | DEFA1 | 8327649  | 0  |
| CEU | chr8 | DEFA1 | 8377649  | 0  |
| CEU | chr8 | DEFA1 | 8427649  | 0  |
| CEU | chr8 | DEFA1 | 8477649  | 0  |
| CEU | chr8 | DEFA1 | 8527649  | 0  |
| CEU | chr8 | DEFA1 | 8577649  | 0  |
| CEU | chr8 | DEFA1 | 8627649  | 0  |
| CEU | chr8 | DEFA1 | 8677649  | 0  |
| CEU | chr8 | DEFA1 | 8727649  | 0  |
| CEU | chr8 | DEFA1 | 8777649  | 0  |
| CEU | chr8 | DEFA1 | 8827649  | 0  |
| CEU | chr8 | DEFA1 | 8877649  | 0  |
| CEU | chr8 | DEFA1 | 8927649  | 0  |
| CEU | chr8 | DEFA1 | 8977649  | 0  |
| CEU | chr8 | DEFA1 | 9027649  | 33 |
| CEU | chr8 | DEFA1 | 9077649  | 61 |
| CEU | chr8 | DEFA1 | 9127649  | 50 |
| CEU | chr8 | DEFA1 | 9177649  | 56 |
| CEU | chr8 | DEFA1 | 9227649  | 53 |
| CEU | chr8 | DEFA1 | 9277649  | 49 |
| CEU | chr8 | DEFA1 | 9327649  | 30 |
| CEU | chr8 | DEFA1 | 9377649  | 0  |
| CEU | chr8 | DEFA1 | 9427649  | 0  |
| CEU | chr8 | DEFA1 | 9477649  | 0  |
| CEU | chr8 | DEFA1 | 9527649  | 0  |
| CEU | chr8 | DEFA1 | 9577649  | 0  |
| CEU | chr8 | DEFA1 | 9627649  | 0  |
| CEU | chr8 | DEFA1 | 9677649  | 0  |
| CEU | chr8 | DEFA1 | 9727649  | 0  |
| CEU | chr8 | DEFA1 | 9777649  | 0  |
| CEU | chr8 | DEFA1 | 9827649  | 0  |
| CEU | chr8 | DEFA1 | 9877649  | 0  |
| CEU | chr8 | DEFA1 | 9927649  | 0  |
| CEU | chr8 | DEFA1 | 9977649  | 0  |
| CEU | chr8 | DEFA1 | 10027649 | 0  |
| CEU | chr8 | DEFA1 | 10077649 | 0  |

3\_Introgression\_data

|     |      |         |          |    |
|-----|------|---------|----------|----|
| CEU | chr8 | DEFA1   | 10127649 | 0  |
| CEU | chr8 | DEFA1   | 10177649 | 0  |
| CEU | chr8 | DEFA1   | 10227649 | 0  |
| CEU | chr8 | DEFA1   | 10277649 | 0  |
| CEU | chr8 | DEFA1   | 10327649 | 0  |
| CEU | chr8 | DEFA1   | 10377649 | 0  |
| CEU | chr8 | DEFA1   | 10427649 | 0  |
| CEU | chr8 | DEFA1   | 10477649 | 0  |
| CEU | chr8 | DEFA1   | 10527649 | 0  |
| CEU | chr8 | DEFA1   | 10577649 | 0  |
| CEU | chr8 | DEFA1   | 10627649 | 0  |
| CEU | chr8 | DEFA1   | 10677649 | 0  |
| CEU | chr8 | DEFA1   | 10727649 | 0  |
| CEU | chr8 | DEFA1   | 10777649 | 0  |
| CEU | chr8 | DEFA1   | 10827649 | 0  |
| CEU | chr8 | DEFA1   | 10877649 | 0  |
| CEU | chr8 | DEFA1   | 10927649 | 0  |
| CEU | chr8 | DEFA1   | 10977649 | 0  |
| CEU | chr8 | DEFA1   | 11027649 | 0  |
| CEU | chr8 | DEFA1   | 11077649 | 0  |
| CEU | chr8 | DEFA1   | 11127649 | 0  |
| CEU | chr8 | DEFA1   | 11177649 | 0  |
| CEU | chr8 | DEFA1   | 11227649 | 0  |
| CEU | chr8 | DEFA1   | 11277649 | 0  |
| CEU | chr8 | DEFA1   | 11327649 | 0  |
| CEU | chr8 | DEFA1   | 11377649 | 0  |
| CEU | chr8 | DEFA1   | 11427649 | 0  |
| CEU | chr8 | DEFA1   | 11477649 | 0  |
| CEU | chr8 | DEFA1   | 11527649 | 0  |
| CEU | chr8 | DEFA1   | 11577649 | 6  |
| CEU | chr8 | DEFA1   | 11627649 | 31 |
| CEU | chr8 | DEFA1   | 11677649 | 47 |
| CEU | chr8 | DEFA1   | 11727649 | 30 |
| CEU | chr8 | DEFA1   | 11777649 | 23 |
| CEU | chr8 | DEFA1   | 11827649 | 16 |
| CEU | chr8 | DEFA1   | 11877649 | 1  |
| CEU | chr8 | DEFA1   | 11927649 | 0  |
| CEU | chr8 | DEFB130 | 7114389  | 0  |
| CEU | chr8 | DEFB130 | 7164389  | 0  |
| CEU | chr8 | DEFB130 | 7214389  | 0  |
| CEU | chr8 | DEFB130 | 7264389  | 0  |
| CEU | chr8 | DEFB130 | 7314389  | 0  |
| CEU | chr8 | DEFB130 | 7364389  | 0  |
| CEU | chr8 | DEFB130 | 7414389  | 0  |
| CEU | chr8 | DEFB130 | 7464389  | 0  |
| CEU | chr8 | DEFB130 | 7514389  | 0  |
| CEU | chr8 | DEFB130 | 7564389  | 0  |
| CEU | chr8 | DEFB130 | 7614389  | 0  |
| CEU | chr8 | DEFB130 | 7664389  | 0  |

## 3\_Introgression\_data

|     |      |         |          |    |
|-----|------|---------|----------|----|
| CEU | chr8 | DEFB130 | 7714389  | 0  |
| CEU | chr8 | DEFB130 | 7764389  | 0  |
| CEU | chr8 | DEFB130 | 7814389  | 0  |
| CEU | chr8 | DEFB130 | 7864389  | 0  |
| CEU | chr8 | DEFB130 | 7914389  | 0  |
| CEU | chr8 | DEFB130 | 7964389  | 0  |
| CEU | chr8 | DEFB130 | 8014389  | 0  |
| CEU | chr8 | DEFB130 | 8064389  | 0  |
| CEU | chr8 | DEFB130 | 8114389  | 0  |
| CEU | chr8 | DEFB130 | 8164389  | 0  |
| CEU | chr8 | DEFB130 | 8214389  | 0  |
| CEU | chr8 | DEFB130 | 8264389  | 0  |
| CEU | chr8 | DEFB130 | 8314389  | 0  |
| CEU | chr8 | DEFB130 | 8364389  | 0  |
| CEU | chr8 | DEFB130 | 8414389  | 0  |
| CEU | chr8 | DEFB130 | 8464389  | 0  |
| CEU | chr8 | DEFB130 | 8514389  | 0  |
| CEU | chr8 | DEFB130 | 8564389  | 0  |
| CEU | chr8 | DEFB130 | 8614389  | 0  |
| CEU | chr8 | DEFB130 | 8664389  | 0  |
| CEU | chr8 | DEFB130 | 8714389  | 0  |
| CEU | chr8 | DEFB130 | 8764389  | 0  |
| CEU | chr8 | DEFB130 | 8814389  | 0  |
| CEU | chr8 | DEFB130 | 8864389  | 0  |
| CEU | chr8 | DEFB130 | 8914389  | 0  |
| CEU | chr8 | DEFB130 | 8964389  | 0  |
| CEU | chr8 | DEFB130 | 9014389  | 18 |
| CEU | chr8 | DEFB130 | 9064389  | 53 |
| CEU | chr8 | DEFB130 | 9114389  | 54 |
| CEU | chr8 | DEFB130 | 9164389  | 57 |
| CEU | chr8 | DEFB130 | 9214389  | 55 |
| CEU | chr8 | DEFB130 | 9264389  | 55 |
| CEU | chr8 | DEFB130 | 9314389  | 39 |
| CEU | chr8 | DEFB130 | 9364389  | 1  |
| CEU | chr8 | DEFB130 | 9414389  | 0  |
| CEU | chr8 | DEFB130 | 9464389  | 0  |
| CEU | chr8 | DEFB130 | 9514389  | 0  |
| CEU | chr8 | DEFB130 | 9564389  | 0  |
| CEU | chr8 | DEFB130 | 9614389  | 0  |
| CEU | chr8 | DEFB130 | 9664389  | 0  |
| CEU | chr8 | DEFB130 | 9714389  | 0  |
| CEU | chr8 | DEFB130 | 9764389  | 0  |
| CEU | chr8 | DEFB130 | 9814389  | 0  |
| CEU | chr8 | DEFB130 | 9864389  | 0  |
| CEU | chr8 | DEFB130 | 9914389  | 0  |
| CEU | chr8 | DEFB130 | 9964389  | 0  |
| CEU | chr8 | DEFB130 | 10014389 | 0  |
| CEU | chr8 | DEFB130 | 10064389 | 0  |
| CEU | chr8 | DEFB130 | 10114389 | 0  |

### 3\_Introgression\_data

|     |      |         |          |    |
|-----|------|---------|----------|----|
| CEU | chr8 | DEFB130 | 10164389 | 0  |
| CEU | chr8 | DEFB130 | 10214389 | 0  |
| CEU | chr8 | DEFB130 | 10264389 | 0  |
| CEU | chr8 | DEFB130 | 10314389 | 0  |
| CEU | chr8 | DEFB130 | 10364389 | 0  |
| CEU | chr8 | DEFB130 | 10414389 | 0  |
| CEU | chr8 | DEFB130 | 10464389 | 0  |
| CEU | chr8 | DEFB130 | 10514389 | 0  |
| CEU | chr8 | DEFB130 | 10564389 | 0  |
| CEU | chr8 | DEFB130 | 10614389 | 0  |
| CEU | chr8 | DEFB130 | 10664389 | 0  |
| CEU | chr8 | DEFB130 | 10714389 | 0  |
| CEU | chr8 | DEFB130 | 10764389 | 0  |
| CEU | chr8 | DEFB130 | 10814389 | 0  |
| CEU | chr8 | DEFB130 | 10864389 | 0  |
| CEU | chr8 | DEFB130 | 10914389 | 0  |
| CEU | chr8 | DEFB130 | 10964389 | 0  |
| CEU | chr8 | DEFB130 | 11014389 | 0  |
| CEU | chr8 | DEFB130 | 11064389 | 0  |
| CEU | chr8 | DEFB130 | 11114389 | 0  |
| CEU | chr8 | DEFB130 | 11164389 | 0  |
| CEU | chr8 | DEFB130 | 11214389 | 0  |
| CEU | chr8 | DEFB130 | 11264389 | 0  |
| CEU | chr8 | DEFB130 | 11314389 | 0  |
| CEU | chr8 | DEFB130 | 11364389 | 0  |
| CEU | chr8 | DEFB130 | 11414389 | 0  |
| CEU | chr8 | DEFB130 | 11464389 | 0  |
| CEU | chr8 | DEFB130 | 11514389 | 0  |
| CEU | chr8 | DEFB130 | 11564389 | 2  |
| CEU | chr8 | DEFB130 | 11614389 | 27 |
| CEU | chr8 | DEFB130 | 11664389 | 41 |
| CEU | chr8 | DEFB130 | 11714389 | 31 |
| CEU | chr8 | DEFB130 | 11764389 | 30 |
| CEU | chr8 | DEFB130 | 11814389 | 19 |
| CEU | chr8 | DEFB130 | 11864389 | 4  |
| CEU | chr8 | DEFB130 | 11914389 | 0  |
| CEU | chr8 | DEFB130 | 11964389 | 0  |
| CEU | chr8 | DEFB130 | 12014389 | 0  |
| CEU | chr8 | DEFB130 | 12064389 | 0  |
| CEU | chr8 | DEFB130 | 12114389 | 0  |
| CEU | chr8 | DEFB130 | 12164389 | 0  |
| CEU | chr8 | DEFB130 | 12214389 | 0  |
| CEU | chr8 | DEFB130 | 12264389 | 0  |
| CEU | chr8 | DEFB130 | 12314389 | 0  |
| CEU | chr8 | DEFB130 | 12364389 | 0  |
| CEU | chr8 | DEFB130 | 12414389 | 0  |
| CEU | chr8 | DEFB130 | 12464389 | 0  |
| CEU | chr8 | DEFB130 | 12514389 | 4  |
| CEU | chr8 | DEFB130 | 12564389 | 25 |

### 3\_Introgression\_data

|     |      |         |          |    |
|-----|------|---------|----------|----|
| CEU | chr8 | DEFB130 | 12614389 | 39 |
| CEU | chr8 | DEFB130 | 12664389 | 40 |
| CEU | chr8 | DEFB130 | 12714389 | 35 |
| CEU | chr8 | DEFB130 | 12764389 | 37 |
| CEU | chr8 | DEFB130 | 12814389 | 48 |
| CEU | chr8 | DEFB130 | 12864389 | 45 |
| CEU | chr8 | DEFB130 | 12914389 | 21 |
| CEU | chr8 | DEFB130 | 12964389 | 11 |
| CEU | chr8 | DEFB130 | 13014389 | 38 |
| CEU | chr8 | DEFB130 | 13064389 | 46 |
| CEU | chr8 | DEFB130 | 13114389 | 28 |
| CEU | chr8 | DEFB130 | 13164389 | 24 |
| CEU | chr8 | DEFB130 | 13214389 | 36 |
| CEU | chr8 | DEFB130 | 13264389 | 49 |
| CEU | chr8 | DEFB130 | 13314389 | 50 |
| CEU | chr8 | DEFB130 | 13364389 | 40 |
| CEU | chr8 | DEFB130 | 13414389 | 44 |
| CEU | chr8 | DEFB130 | 13464389 | 46 |
| CEU | chr8 | DEFB130 | 13514389 | 61 |
| CEU | chr8 | DEFB130 | 13564389 | 60 |
| CEU | chr8 | DEFB130 | 13614389 | 28 |
| CEU | chr8 | DEFB130 | 13664389 | 17 |
| CEU | chr8 | DEFB130 | 13714389 | 49 |
| CEU | chr8 | DEFB130 | 13764389 | 75 |
| CEU | chr8 | DEFB130 | 13814389 | 79 |
| CEU | chr8 | DEFB130 | 13864389 | 77 |
| CEU | chr8 | DEFB130 | 13914389 | 37 |
| CEU | chr8 | DEFB130 | 13964389 | 20 |
| CEU | chr8 | DEFB130 | 14014389 | 36 |
| CEU | chr8 | DEFB130 | 14064389 | 76 |
| CEU | chr8 | DEFB130 | 14114389 | 84 |
| CEU | chr8 | DEFB130 | 14164389 | 43 |
| CEU | chr8 | DEFB130 | 14214389 | 39 |
| CEU | chr8 | DEFB130 | 14264389 | 37 |
| CEU | chr8 | DEFB130 | 14314389 | 29 |
| CEU | chr8 | DEFB130 | 14364389 | 47 |
| CEU | chr8 | DEFB130 | 14414389 | 58 |
| CEU | chr8 | DEFB130 | 14464389 | 50 |
| CEU | chr8 | DEFB130 | 14514389 | 28 |
| CEU | chr8 | DEFB130 | 14564389 | 28 |
| CEU | chr8 | DEFB130 | 14614389 | 57 |
| CEU | chr8 | DEFB130 | 14664389 | 72 |
| CEU | chr8 | DEFB130 | 14714389 | 73 |
| CEU | chr8 | DEFB130 | 14764389 | 68 |
| CEU | chr8 | DEFB130 | 14814389 | 56 |
| CEU | chr8 | DEFB130 | 14864389 | 42 |
| CEU | chr8 | DEFB130 | 14914389 | 38 |
| CEU | chr8 | DEFB130 | 14964389 | 20 |
| CEU | chr8 | DEFB130 | 15014389 | 0  |



### 3\_Introgression\_data

|     |      |         |          |    |
|-----|------|---------|----------|----|
| CEU | chr8 | DEFB130 | 15064389 | 0  |
| CEU | chr8 | DEFB130 | 15114389 | 0  |
| CEU | chr8 | DEFB130 | 15164389 | 0  |
| CEU | chr8 | DEFB130 | 15214389 | 0  |
| CEU | chr8 | DEFB130 | 15264389 | 0  |
| CEU | chr8 | DEFB130 | 15314389 | 0  |
| CEU | chr8 | DEFB130 | 15364389 | 0  |
| CEU | chr8 | DEFB130 | 15414389 | 0  |
| CEU | chr8 | DEFB130 | 15464389 | 0  |
| CEU | chr8 | DEFB130 | 15514389 | 0  |
| CEU | chr8 | DEFB130 | 15564389 | 0  |
| CEU | chr8 | DEFB130 | 15614389 | 0  |
| CEU | chr8 | DEFB130 | 15664389 | 0  |
| CEU | chr8 | DEFB130 | 15714389 | 0  |
| CEU | chr8 | DEFB130 | 15764389 | 0  |
| CEU | chr8 | DEFB130 | 15814389 | 0  |
| CEU | chr8 | DEFB130 | 15864389 | 0  |
| CEU | chr8 | DEFB130 | 15914389 | 0  |
| CEU | chr8 | DEFB130 | 15964389 | 0  |
| CEU | chr8 | DEFB130 | 16014389 | 0  |
| CEU | chr8 | DEFB130 | 16064389 | 0  |
| CEU | chr8 | DEFB130 | 16114389 | 1  |
| CEU | chr8 | DEFB130 | 16164389 | 25 |
| CEU | chr8 | DEFB130 | 16214389 | 44 |
| CEU | chr8 | DEFB130 | 16264389 | 62 |
| CEU | chr8 | DEFB130 | 16314389 | 85 |
| CEU | chr8 | DEFB130 | 16364389 | 68 |
| CEU | chr8 | DEFB130 | 16414389 | 75 |
| CEU | chr8 | DEFB130 | 16464389 | 73 |
| CEU | chr8 | DEFB130 | 16514389 | 41 |
| CEU | chr8 | DEFB130 | 16564389 | 35 |
| CEU | chr8 | DEFB130 | 16614389 | 35 |
| CEU | chr8 | DEFB130 | 16664389 | 42 |
| CEU | chr8 | DEFB130 | 16714389 | 44 |
| CEU | chr8 | DEFB130 | 16764389 | 47 |
| CEU | chr8 | DEFB130 | 16814389 | 65 |
| CEU | chr8 | DEFB130 | 16864389 | 53 |
| CEU | chr8 | DEFB130 | 16914389 | 30 |
| CEU | chr8 | DEFB130 | 16964389 | 31 |
| CEU | chr8 | DEFB130 | 17014389 | 39 |
| CEU | chr8 | DEFB130 | 7360962  | 0  |
| CEU | chr8 | DEFB130 | 7410962  | 0  |
| CEU | chr8 | DEFB130 | 7460962  | 0  |
| CEU | chr8 | DEFB130 | 7510962  | 0  |
| CEU | chr8 | DEFB130 | 7560962  | 0  |
| CEU | chr8 | DEFB130 | 7610962  | 0  |
| CEU | chr8 | DEFB130 | 7660962  | 0  |
| CEU | chr8 | DEFB130 | 7710962  | 0  |
| CEU | chr8 | DEFB130 | 7760962  | 0  |

### 3\_Introgression\_data

|     |      |         |          |    |
|-----|------|---------|----------|----|
| CEU | chr8 | DEFB130 | 7810962  | 0  |
| CEU | chr8 | DEFB130 | 7860962  | 0  |
| CEU | chr8 | DEFB130 | 7910962  | 0  |
| CEU | chr8 | DEFB130 | 7960962  | 0  |
| CEU | chr8 | DEFB130 | 8010962  | 0  |
| CEU | chr8 | DEFB130 | 8060962  | 0  |
| CEU | chr8 | DEFB130 | 8110962  | 0  |
| CEU | chr8 | DEFB130 | 8160962  | 0  |
| CEU | chr8 | DEFB130 | 8210962  | 0  |
| CEU | chr8 | DEFB130 | 8260962  | 0  |
| CEU | chr8 | DEFB130 | 8310962  | 0  |
| CEU | chr8 | DEFB130 | 8360962  | 0  |
| CEU | chr8 | DEFB130 | 8410962  | 0  |
| CEU | chr8 | DEFB130 | 8460962  | 0  |
| CEU | chr8 | DEFB130 | 8510962  | 0  |
| CEU | chr8 | DEFB130 | 8560962  | 0  |
| CEU | chr8 | DEFB130 | 8610962  | 0  |
| CEU | chr8 | DEFB130 | 8660962  | 0  |
| CEU | chr8 | DEFB130 | 8710962  | 0  |
| CEU | chr8 | DEFB130 | 8760962  | 0  |
| CEU | chr8 | DEFB130 | 8810962  | 0  |
| CEU | chr8 | DEFB130 | 8860962  | 0  |
| CEU | chr8 | DEFB130 | 8910962  | 0  |
| CEU | chr8 | DEFB130 | 8960962  | 0  |
| CEU | chr8 | DEFB130 | 9010962  | 15 |
| CEU | chr8 | DEFB130 | 9060962  | 48 |
| CEU | chr8 | DEFB130 | 9110962  | 57 |
| CEU | chr8 | DEFB130 | 9160962  | 61 |
| CEU | chr8 | DEFB130 | 9210962  | 53 |
| CEU | chr8 | DEFB130 | 9260962  | 45 |
| CEU | chr8 | DEFB130 | 9310962  | 41 |
| CEU | chr8 | DEFB130 | 9360962  | 12 |
| CEU | chr8 | DEFB130 | 9410962  | 0  |
| CEU | chr8 | DEFB130 | 9460962  | 0  |
| CEU | chr8 | DEFB130 | 9510962  | 0  |
| CEU | chr8 | DEFB130 | 9560962  | 0  |
| CEU | chr8 | DEFB130 | 9610962  | 0  |
| CEU | chr8 | DEFB130 | 9660962  | 0  |
| CEU | chr8 | DEFB130 | 9710962  | 0  |
| CEU | chr8 | DEFB130 | 9760962  | 0  |
| CEU | chr8 | DEFB130 | 9810962  | 0  |
| CEU | chr8 | DEFB130 | 9860962  | 0  |
| CEU | chr8 | DEFB130 | 9910962  | 0  |
| CEU | chr8 | DEFB130 | 9960962  | 0  |
| CEU | chr8 | DEFB130 | 10010962 | 0  |
| CEU | chr8 | DEFB130 | 10060962 | 0  |
| CEU | chr8 | DEFB130 | 10110962 | 0  |
| CEU | chr8 | DEFB130 | 10160962 | 0  |
| CEU | chr8 | DEFB130 | 10210962 | 0  |

### 3\_Introgression\_data

|     |      |         |          |    |
|-----|------|---------|----------|----|
| CEU | chr8 | DEFB130 | 10260962 | 0  |
| CEU | chr8 | DEFB130 | 10310962 | 0  |
| CEU | chr8 | DEFB130 | 10360962 | 0  |
| CEU | chr8 | DEFB130 | 10410962 | 0  |
| CEU | chr8 | DEFB130 | 10460962 | 0  |
| CEU | chr8 | DEFB130 | 10510962 | 0  |
| CEU | chr8 | DEFB130 | 10560962 | 0  |
| CEU | chr8 | DEFB130 | 10610962 | 0  |
| CEU | chr8 | DEFB130 | 10660962 | 0  |
| CEU | chr8 | DEFB130 | 10710962 | 0  |
| CEU | chr8 | DEFB130 | 10760962 | 0  |
| CEU | chr8 | DEFB130 | 10810962 | 0  |
| CEU | chr8 | DEFB130 | 10860962 | 0  |
| CEU | chr8 | DEFB130 | 10910962 | 0  |
| CEU | chr8 | DEFB130 | 10960962 | 0  |
| CEU | chr8 | DEFB130 | 11010962 | 0  |
| CEU | chr8 | DEFB130 | 11060962 | 0  |
| CEU | chr8 | DEFB130 | 11110962 | 0  |
| CEU | chr8 | DEFB130 | 11160962 | 0  |
| CEU | chr8 | DEFB130 | 11210962 | 0  |
| CEU | chr8 | DEFB130 | 11260962 | 0  |
| CEU | chr8 | DEFB130 | 11310962 | 0  |
| CEU | chr8 | DEFB130 | 11360962 | 0  |
| CEU | chr8 | DEFB130 | 11410962 | 0  |
| CEU | chr8 | DEFB130 | 11460962 | 0  |
| CEU | chr8 | DEFB130 | 11510962 | 0  |
| CEU | chr8 | DEFB130 | 11560962 | 2  |
| CEU | chr8 | DEFB130 | 11610962 | 27 |
| CEU | chr8 | DEFB130 | 11660962 | 38 |
| CEU | chr8 | DEFB130 | 11710962 | 30 |
| CEU | chr8 | DEFB130 | 11760962 | 32 |
| CEU | chr8 | DEFB130 | 11810962 | 20 |
| CEU | chr8 | DEFB130 | 11860962 | 5  |
| CEU | chr8 | DEFB130 | 11910962 | 0  |
| CEU | chr8 | DEFB130 | 11960962 | 0  |
| CEU | chr8 | DEFB130 | 12010962 | 0  |
| CEU | chr8 | DEFB130 | 12060962 | 0  |
| CEU | chr8 | DEFB130 | 12110962 | 0  |
| CEU | chr8 | DEFB130 | 12160962 | 0  |
| CEU | chr8 | DEFB130 | 12210962 | 0  |
| CEU | chr8 | DEFB130 | 12260962 | 0  |
| CEU | chr8 | DEFB130 | 12310962 | 0  |
| CEU | chr8 | DEFB130 | 12360962 | 0  |
| CEU | chr8 | DEFB130 | 12410962 | 0  |
| CEU | chr8 | DEFB130 | 12460962 | 0  |
| CEU | chr8 | DEFB130 | 12510962 | 3  |
| CEU | chr8 | DEFB130 | 12560962 | 24 |
| CEU | chr8 | DEFB130 | 12610962 | 36 |
| CEU | chr8 | DEFB130 | 12660962 | 39 |

## 3\_Introgression\_data

|     |      |         |          |    |
|-----|------|---------|----------|----|
| CEU | chr8 | DEFB130 | 12710962 | 38 |
| CEU | chr8 | DEFB130 | 12760962 | 37 |
| CEU | chr8 | DEFB130 | 12810962 | 45 |
| CEU | chr8 | DEFB130 | 12860962 | 47 |
| CEU | chr8 | DEFB130 | 12910962 | 25 |
| CEU | chr8 | DEFB130 | 12960962 | 11 |
| CEU | chr8 | DEFB130 | 13010962 | 37 |
| CEU | chr8 | DEFB130 | 13060962 | 46 |
| CEU | chr8 | DEFB130 | 13110962 | 29 |
| CEU | chr8 | DEFB130 | 13160962 | 23 |
| CEU | chr8 | DEFB130 | 13210962 | 36 |
| CEU | chr8 | DEFB130 | 13260962 | 48 |
| CEU | chr8 | DEFB130 | 13310962 | 43 |
| CEU | chr8 | DEFB130 | 13360962 | 39 |
| CEU | chr8 | DEFB130 | 13410962 | 48 |
| CEU | chr8 | DEFB130 | 13460962 | 48 |
| CEU | chr8 | DEFB130 | 13510962 | 61 |
| CEU | chr8 | DEFB130 | 13560962 | 61 |
| CEU | chr8 | DEFB130 | 13610962 | 30 |
| CEU | chr8 | DEFB130 | 13660962 | 17 |
| CEU | chr8 | DEFB130 | 13710962 | 47 |
| CEU | chr8 | DEFB130 | 13760962 | 74 |
| CEU | chr8 | DEFB130 | 13810962 | 81 |
| CEU | chr8 | DEFB130 | 13860962 | 78 |
| CEU | chr8 | DEFB130 | 13910962 | 37 |
| CEU | chr8 | DEFB130 | 13960962 | 20 |
| CEU | chr8 | DEFB130 | 14010962 | 32 |
| CEU | chr8 | DEFB130 | 14060962 | 75 |
| CEU | chr8 | DEFB130 | 14110962 | 88 |
| CEU | chr8 | DEFB130 | 14160962 | 44 |
| CEU | chr8 | DEFB130 | 14210962 | 39 |
| CEU | chr8 | DEFB130 | 14260962 | 36 |
| CEU | chr8 | DEFB130 | 14310962 | 29 |
| CEU | chr8 | DEFB130 | 14360962 | 47 |
| CEU | chr8 | DEFB130 | 14410962 | 47 |
| CEU | chr8 | DEFB130 | 14460962 | 49 |
| CEU | chr8 | DEFB130 | 14510962 | 40 |
| CEU | chr8 | DEFB130 | 14560962 | 28 |
| CEU | chr8 | DEFB130 | 14610962 | 57 |
| CEU | chr8 | DEFB130 | 14660962 | 68 |
| CEU | chr8 | DEFB130 | 14710962 | 72 |
| CEU | chr8 | DEFB130 | 14760962 | 73 |
| CEU | chr8 | DEFB130 | 14810962 | 54 |
| CEU | chr8 | DEFB130 | 14860962 | 41 |
| CEU | chr8 | DEFB130 | 14910962 | 40 |
| CEU | chr8 | DEFB130 | 14960962 | 22 |
| CEU | chr8 | DEFB130 | 15010962 | 1  |
| CEU | chr8 | DEFB130 | 15060962 | 0  |
| CEU | chr8 | DEFB130 | 15110962 | 0  |

### 3\_Introgression\_data

|     |      |         |           |    |
|-----|------|---------|-----------|----|
| CEU | chr8 | DEFB130 | 15160962  | 0  |
| CEU | chr8 | DEFB130 | 15210962  | 0  |
| CEU | chr8 | DEFB130 | 15260962  | 0  |
| CEU | chr8 | DEFB130 | 15310962  | 0  |
| CEU | chr8 | DEFB130 | 15360962  | 0  |
| CEU | chr8 | DEFB130 | 15410962  | 0  |
| CEU | chr8 | DEFB130 | 15460962  | 0  |
| CEU | chr8 | DEFB130 | 15510962  | 0  |
| CEU | chr8 | DEFB130 | 15560962  | 0  |
| CEU | chr8 | DEFB130 | 15610962  | 0  |
| CEU | chr8 | DEFB130 | 15660962  | 0  |
| CEU | chr8 | DEFB130 | 15710962  | 0  |
| CEU | chr8 | DEFB130 | 15760962  | 0  |
| CEU | chr8 | DEFB130 | 15810962  | 0  |
| CEU | chr8 | DEFB130 | 15860962  | 0  |
| CEU | chr8 | DEFB130 | 15910962  | 0  |
| CEU | chr8 | DEFB130 | 15960962  | 0  |
| CEU | chr8 | DEFB130 | 16010962  | 0  |
| CEU | chr8 | DEFB130 | 16060962  | 0  |
| CEU | chr8 | DEFB130 | 16110962  | 1  |
| CEU | chr8 | DEFB130 | 16160962  | 25 |
| CEU | chr8 | DEFB130 | 16210962  | 43 |
| CEU | chr8 | DEFB130 | 16260962  | 58 |
| CEU | chr8 | DEFB130 | 16310962  | 65 |
| CEU | chr8 | DEFB130 | 16360962  | 72 |
| CEU | chr8 | DEFB130 | 16410962  | 94 |
| CEU | chr8 | DEFB130 | 16460962  | 73 |
| CEU | chr8 | DEFB130 | 16510962  | 42 |
| CEU | chr8 | DEFB130 | 16560962  | 34 |
| CEU | chr8 | DEFB130 | 16610962  | 35 |
| CEU | chr8 | DEFB130 | 16660962  | 41 |
| CEU | chr8 | DEFB130 | 16710962  | 43 |
| CEU | chr8 | DEFB130 | 16760962  | 47 |
| CEU | chr8 | DEFB130 | 16810962  | 67 |
| CEU | chr8 | DEFB130 | 16860962  | 54 |
| CEU | chr8 | DEFB130 | 16910962  | 30 |
| CEU | chr8 | DEFB130 | 16960962  | 29 |
| CEU | chr8 | DEFB130 | 17010962  | 39 |
| CEU | chr8 | DEFB130 | 17060962  | 45 |
| CEU | chr8 | DEFB130 | 17110962  | 38 |
| CEU | chr8 | DEFB130 | 17160962  | 48 |
| CEU | chr8 | DEFB130 | 17210962  | 55 |
| CEU | chr8 | DEFB130 | 17260962  | 46 |
| CEU | chr1 | FAM72A  | 201236179 | 0  |
| CEU | chr1 | FAM72A  | 201286179 | 0  |
| CEU | chr1 | FAM72A  | 201336179 | 0  |
| CEU | chr1 | FAM72A  | 201386179 | 0  |
| CEU | chr1 | FAM72A  | 201436179 | 0  |
| CEU | chr1 | FAM72A  | 201486179 | 0  |

## 3\_Introgression\_data

|     |      |        |           |   |
|-----|------|--------|-----------|---|
| CEU | chr1 | FAM72A | 201536179 | 0 |
| CEU | chr1 | FAM72A | 201586179 | 0 |
| CEU | chr1 | FAM72A | 201636179 | 0 |
| CEU | chr1 | FAM72A | 201686179 | 0 |
| CEU | chr1 | FAM72A | 201736179 | 0 |
| CEU | chr1 | FAM72A | 201786179 | 0 |
| CEU | chr1 | FAM72A | 201836179 | 0 |
| CEU | chr1 | FAM72A | 201886179 | 0 |
| CEU | chr1 | FAM72A | 201936179 | 0 |
| CEU | chr1 | FAM72A | 201986179 | 0 |
| CEU | chr1 | FAM72A | 202036179 | 0 |
| CEU | chr1 | FAM72A | 202086179 | 0 |
| CEU | chr1 | FAM72A | 202136179 | 0 |
| CEU | chr1 | FAM72A | 202186179 | 0 |
| CEU | chr1 | FAM72A | 202236179 | 0 |
| CEU | chr1 | FAM72A | 202286179 | 0 |
| CEU | chr1 | FAM72A | 202336179 | 0 |
| CEU | chr1 | FAM72A | 202386179 | 0 |
| CEU | chr1 | FAM72A | 202436179 | 0 |
| CEU | chr1 | FAM72A | 202486179 | 0 |
| CEU | chr1 | FAM72A | 202536179 | 0 |
| CEU | chr1 | FAM72A | 202586179 | 0 |
| CEU | chr1 | FAM72A | 202636179 | 0 |
| CEU | chr1 | FAM72A | 202686179 | 0 |
| CEU | chr1 | FAM72A | 202736179 | 0 |
| CEU | chr1 | FAM72A | 202786179 | 0 |
| CEU | chr1 | FAM72A | 202836179 | 0 |
| CEU | chr1 | FAM72A | 202886179 | 0 |
| CEU | chr1 | FAM72A | 202936179 | 0 |
| CEU | chr1 | FAM72A | 202986179 | 0 |
| CEU | chr1 | FAM72A | 203036179 | 0 |
| CEU | chr1 | FAM72A | 203086179 | 0 |
| CEU | chr1 | FAM72A | 203136179 | 0 |
| CEU | chr1 | FAM72A | 203186179 | 0 |
| CEU | chr1 | FAM72A | 203236179 | 0 |
| CEU | chr1 | FAM72A | 203286179 | 0 |
| CEU | chr1 | FAM72A | 203336179 | 0 |
| CEU | chr1 | FAM72A | 203386179 | 0 |
| CEU | chr1 | FAM72A | 203436179 | 0 |
| CEU | chr1 | FAM72A | 203486179 | 0 |
| CEU | chr1 | FAM72A | 203536179 | 0 |
| CEU | chr1 | FAM72A | 203586179 | 0 |
| CEU | chr1 | FAM72A | 203636179 | 0 |
| CEU | chr1 | FAM72A | 203686179 | 0 |
| CEU | chr1 | FAM72A | 203736179 | 0 |
| CEU | chr1 | FAM72A | 203786179 | 0 |
| CEU | chr1 | FAM72A | 203836179 | 0 |
| CEU | chr1 | FAM72A | 203886179 | 0 |
| CEU | chr1 | FAM72A | 203936179 | 0 |

## 3\_Introgression\_data

|     |      |        |           |    |
|-----|------|--------|-----------|----|
| CEU | chr1 | FAM72A | 203986179 | 0  |
| CEU | chr1 | FAM72A | 204036179 | 0  |
| CEU | chr1 | FAM72A | 204086179 | 0  |
| CEU | chr1 | FAM72A | 204136179 | 0  |
| CEU | chr1 | FAM72A | 204186179 | 0  |
| CEU | chr1 | FAM72A | 204236179 | 0  |
| CEU | chr1 | FAM72A | 204286179 | 0  |
| CEU | chr1 | FAM72A | 204336179 | 0  |
| CEU | chr1 | FAM72A | 204386179 | 0  |
| CEU | chr1 | FAM72A | 204436179 | 0  |
| CEU | chr1 | FAM72A | 204486179 | 0  |
| CEU | chr1 | FAM72A | 204536179 | 0  |
| CEU | chr1 | FAM72A | 204586179 | 0  |
| CEU | chr1 | FAM72A | 204636179 | 0  |
| CEU | chr1 | FAM72A | 204686179 | 0  |
| CEU | chr1 | FAM72A | 204736179 | 0  |
| CEU | chr1 | FAM72A | 204786179 | 0  |
| CEU | chr1 | FAM72A | 204836179 | 0  |
| CEU | chr1 | FAM72A | 204886179 | 13 |
| CEU | chr1 | FAM72A | 204936179 | 47 |
| CEU | chr1 | FAM72A | 204986179 | 34 |
| CEU | chr1 | FAM72A | 205036179 | 0  |
| CEU | chr1 | FAM72A | 205086179 | 0  |
| CEU | chr1 | FAM72A | 205136179 | 0  |
| CEU | chr1 | FAM72A | 205186179 | 0  |
| CEU | chr1 | FAM72A | 205236179 | 0  |
| CEU | chr1 | FAM72A | 205286179 | 5  |
| CEU | chr1 | FAM72A | 205336179 | 31 |
| CEU | chr1 | FAM72A | 205386179 | 44 |
| CEU | chr1 | FAM72A | 205436179 | 46 |
| CEU | chr1 | FAM72A | 205486179 | 28 |
| CEU | chr1 | FAM72A | 205536179 | 0  |
| CEU | chr1 | FAM72A | 205586179 | 0  |
| CEU | chr1 | FAM72A | 205636179 | 0  |
| CEU | chr1 | FAM72A | 205686179 | 0  |
| CEU | chr1 | FAM72A | 205736179 | 0  |
| CEU | chr1 | FAM72A | 205786179 | 0  |
| CEU | chr1 | FAM72A | 205836179 | 0  |
| CEU | chr1 | FAM72A | 205886179 | 0  |
| CEU | chr1 | FAM72A | 205936179 | 0  |
| CEU | chr1 | FAM72A | 205986179 | 0  |
| CEU | chr1 | FAM72A | 206036179 | 0  |
| CEU | chr1 | FAM72A | 206086179 | 11 |
| CEU | chr1 | FAM72A | 206136179 | 24 |
| CEU | chr1 | FAM72A | 206186179 | 25 |
| CEU | chr1 | FAM72A | 206236179 | 12 |
| CEU | chr1 | FAM72A | 206286179 | 0  |
| CEU | chr1 | FAM72A | 206336179 | 0  |
| CEU | chr1 | FAM72A | 206386179 | 0  |

## 3\_Introgression\_data

|     |      |        |           |    |
|-----|------|--------|-----------|----|
| CEU | chr1 | FAM72A | 206436179 | 0  |
| CEU | chr1 | FAM72A | 206486179 | 6  |
| CEU | chr1 | FAM72A | 206536179 | 15 |
| CEU | chr1 | FAM72A | 206586179 | 51 |
| CEU | chr1 | FAM72A | 206636179 | 53 |
| CEU | chr1 | FAM72A | 206686179 | 18 |
| CEU | chr1 | FAM72A | 206736179 | 7  |
| CEU | chr1 | FAM72A | 206786179 | 0  |
| CEU | chr1 | FAM72A | 206836179 | 0  |
| CEU | chr1 | FAM72A | 206886179 | 0  |
| CEU | chr1 | FAM72A | 206936179 | 0  |
| CEU | chr1 | FAM72A | 206986179 | 0  |
| CEU | chr1 | FAM72A | 207036179 | 0  |
| CEU | chr1 | FAM72A | 207086179 | 0  |
| CEU | chr1 | FAM72A | 207136179 | 0  |
| CEU | chr1 | FAM72A | 207186179 | 0  |
| CEU | chr1 | FAM72A | 207236179 | 0  |
| CEU | chr1 | FAM72A | 207286179 | 0  |
| CEU | chr1 | FAM72A | 207336179 | 0  |
| CEU | chr1 | FAM72A | 207386179 | 0  |
| CEU | chr1 | FAM72A | 207436179 | 0  |
| CEU | chr1 | FAM72A | 207486179 | 0  |
| CEU | chr1 | FAM72A | 207536179 | 0  |
| CEU | chr1 | FAM72A | 207586179 | 0  |
| CEU | chr1 | FAM72A | 207636179 | 0  |
| CEU | chr1 | FAM72A | 207686179 | 0  |
| CEU | chr1 | FAM72A | 207736179 | 18 |
| CEU | chr1 | FAM72A | 207786179 | 47 |
| CEU | chr1 | FAM72A | 207836179 | 80 |
| CEU | chr1 | FAM72A | 207886179 | 65 |
| CEU | chr1 | FAM72A | 207936179 | 28 |
| CEU | chr1 | FAM72A | 207986179 | 33 |
| CEU | chr1 | FAM72A | 208036179 | 30 |
| CEU | chr1 | FAM72A | 208086179 | 11 |
| CEU | chr1 | FAM72A | 208136179 | 0  |
| CEU | chr1 | FAM72A | 208186179 | 0  |
| CEU | chr1 | FAM72A | 208236179 | 0  |
| CEU | chr1 | FAM72A | 208286179 | 0  |
| CEU | chr1 | FAM72A | 208336179 | 0  |
| CEU | chr1 | FAM72A | 208386179 | 0  |
| CEU | chr1 | FAM72A | 208436179 | 0  |
| CEU | chr1 | FAM72A | 208486179 | 0  |
| CEU | chr1 | FAM72A | 208536179 | 0  |
| CEU | chr1 | FAM72A | 208586179 | 0  |
| CEU | chr1 | FAM72A | 208636179 | 0  |
| CEU | chr1 | FAM72A | 208686179 | 0  |
| CEU | chr1 | FAM72A | 208736179 | 17 |
| CEU | chr1 | FAM72A | 208786179 | 57 |
| CEU | chr1 | FAM72A | 208836179 | 40 |



## 3\_Introgression\_data

|     |      |         |           |     |
|-----|------|---------|-----------|-----|
| CEU | chr1 | FAM72A  | 208886179 | 0   |
| CEU | chr1 | FAM72A  | 208936179 | 0   |
| CEU | chr1 | FAM72A  | 208986179 | 0   |
| CEU | chr1 | FAM72A  | 209036179 | 0   |
| CEU | chr1 | FAM72A  | 209086179 | 0   |
| CEU | chr1 | FAM72A  | 209136179 | 0   |
| CEU | chr1 | FAM72A  | 209186179 | 0   |
| CEU | chr1 | FAM72A  | 209236179 | 0   |
| CEU | chr1 | FAM72A  | 209286179 | 0   |
| CEU | chr1 | FAM72A  | 209336179 | 0   |
| CEU | chr1 | FAM72A  | 209386179 | 0   |
| CEU | chr1 | FAM72A  | 209436179 | 0   |
| CEU | chr1 | FAM72A  | 209486179 | 0   |
| CEU | chr1 | FAM72A  | 209536179 | 0   |
| CEU | chr1 | FAM72A  | 209586179 | 0   |
| CEU | chr1 | FAM72A  | 209636179 | 0   |
| CEU | chr1 | FAM72A  | 209686179 | 0   |
| CEU | chr1 | FAM72A  | 209736179 | 2   |
| CEU | chr1 | FAM72A  | 209786179 | 38  |
| CEU | chr1 | FAM72A  | 209836179 | 44  |
| CEU | chr1 | FAM72A  | 209886179 | 22  |
| CEU | chr1 | FAM72A  | 209936179 | 37  |
| CEU | chr1 | FAM72A  | 209986179 | 39  |
| CEU | chr1 | FAM72A  | 210036179 | 74  |
| CEU | chr1 | FAM72A  | 210086179 | 77  |
| CEU | chr1 | FAM72A  | 210136179 | 46  |
| CEU | chr1 | FAM72A  | 210186179 | 47  |
| CEU | chr1 | FAM72A  | 210236179 | 41  |
| CEU | chr1 | FAM72A  | 210286179 | 31  |
| CEU | chr1 | FAM72A  | 210336179 | 33  |
| CEU | chr1 | FAM72A  | 210386179 | 32  |
| CEU | chr1 | FAM72A  | 210436179 | 22  |
| CEU | chr1 | FAM72A  | 210486179 | 31  |
| CEU | chr1 | FAM72A  | 210536179 | 44  |
| CEU | chr1 | FAM72A  | 210586179 | 40  |
| CEU | chr1 | FAM72A  | 210636179 | 36  |
| CEU | chr1 | FAM72A  | 210686179 | 37  |
| CEU | chr1 | FAM72A  | 210736179 | 24  |
| CEU | chr1 | FAM72A  | 210786179 | 54  |
| CEU | chr1 | FAM72A  | 210836179 | 115 |
| CEU | chr1 | FAM72A  | 210886179 | 84  |
| CEU | chr1 | FAM72A  | 210936179 | 32  |
| CEU | chr1 | FAM72A  | 210986179 | 28  |
| CEU | chr1 | FAM72A  | 211036179 | 18  |
| CEU | chr1 | FAM72A  | 211086179 | 26  |
| CEU | chr1 | FAM72A  | 211136179 | 34  |
| CEU | chr9 | FAM75A1 | 34405667  | 37  |
| CEU | chr9 | FAM75A1 | 34455667  | 45  |
| CEU | chr9 | FAM75A1 | 34505667  | 30  |

3\_Introgression\_data

|     |      |         |          |    |
|-----|------|---------|----------|----|
| CEU | chr9 | FAM75A1 | 34555667 | 39 |
| CEU | chr9 | FAM75A1 | 34605667 | 39 |
| CEU | chr9 | FAM75A1 | 34655667 | 31 |
| CEU | chr9 | FAM75A1 | 34705667 | 19 |
| CEU | chr9 | FAM75A1 | 34755667 | 0  |
| CEU | chr9 | FAM75A1 | 34805667 | 0  |
| CEU | chr9 | FAM75A1 | 34855667 | 0  |
| CEU | chr9 | FAM75A1 | 34905667 | 0  |
| CEU | chr9 | FAM75A1 | 34955667 | 0  |
| CEU | chr9 | FAM75A1 | 35005667 | 0  |
| CEU | chr9 | FAM75A1 | 35055667 | 0  |
| CEU | chr9 | FAM75A1 | 35105667 | 0  |
| CEU | chr9 | FAM75A1 | 35155667 | 0  |
| CEU | chr9 | FAM75A1 | 35205667 | 0  |
| CEU | chr9 | FAM75A1 | 35255667 | 0  |
| CEU | chr9 | FAM75A1 | 35305667 | 0  |
| CEU | chr9 | FAM75A1 | 35355667 | 0  |
| CEU | chr9 | FAM75A1 | 35405667 | 0  |
| CEU | chr9 | FAM75A1 | 35455667 | 0  |
| CEU | chr9 | FAM75A1 | 35505667 | 0  |
| CEU | chr9 | FAM75A1 | 35555667 | 0  |
| CEU | chr9 | FAM75A1 | 35605667 | 0  |
| CEU | chr9 | FAM75A1 | 35655667 | 0  |
| CEU | chr9 | FAM75A1 | 35705667 | 0  |
| CEU | chr9 | FAM75A1 | 35755667 | 0  |
| CEU | chr9 | FAM75A1 | 35805667 | 0  |
| CEU | chr9 | FAM75A1 | 35855667 | 0  |
| CEU | chr9 | FAM75A1 | 35905667 | 0  |
| CEU | chr9 | FAM75A1 | 35955667 | 0  |
| CEU | chr9 | FAM75A1 | 36005667 | 0  |
| CEU | chr9 | FAM75A1 | 36055667 | 0  |
| CEU | chr9 | FAM75A1 | 36105667 | 0  |
| CEU | chr9 | FAM75A1 | 36155667 | 0  |
| CEU | chr9 | FAM75A1 | 36205667 | 0  |
| CEU | chr9 | FAM75A1 | 36255667 | 0  |
| CEU | chr9 | FAM75A1 | 36305667 | 0  |
| CEU | chr9 | FAM75A1 | 36355667 | 0  |
| CEU | chr9 | FAM75A1 | 36405667 | 0  |
| CEU | chr9 | FAM75A1 | 36455667 | 0  |
| CEU | chr9 | FAM75A1 | 36505667 | 0  |
| CEU | chr9 | FAM75A1 | 36555667 | 0  |
| CEU | chr9 | FAM75A1 | 36605667 | 0  |
| CEU | chr9 | FAM75A1 | 36655667 | 0  |
| CEU | chr9 | FAM75A1 | 36705667 | 0  |
| CEU | chr9 | FAM75A1 | 36755667 | 0  |
| CEU | chr9 | FAM75A1 | 36805667 | 13 |
| CEU | chr9 | FAM75A1 | 36855667 | 31 |
| CEU | chr9 | FAM75A1 | 36905667 | 19 |
| CEU | chr9 | FAM75A1 | 36955667 | 1  |

## 3\_Introgression\_data

|     |      |         |          |    |
|-----|------|---------|----------|----|
| CEU | chr9 | FAM75A1 | 37005667 | 0  |
| CEU | chr9 | FAM75A1 | 37055667 | 0  |
| CEU | chr9 | FAM75A1 | 37105667 | 0  |
| CEU | chr9 | FAM75A1 | 37155667 | 0  |
| CEU | chr9 | FAM75A1 | 37205667 | 0  |
| CEU | chr9 | FAM75A1 | 37255667 | 0  |
| CEU | chr9 | FAM75A1 | 37305667 | 0  |
| CEU | chr9 | FAM75A1 | 37355667 | 0  |
| CEU | chr9 | FAM75A1 | 37405667 | 0  |
| CEU | chr9 | FAM75A1 | 37455667 | 0  |
| CEU | chr9 | FAM75A1 | 37505667 | 0  |
| CEU | chr9 | FAM75A1 | 37555667 | 0  |
| CEU | chr9 | FAM75A1 | 37605667 | 0  |
| CEU | chr9 | FAM75A1 | 37655667 | 0  |
| CEU | chr9 | FAM75A1 | 37705667 | 0  |
| CEU | chr9 | FAM75A1 | 37755667 | 0  |
| CEU | chr9 | FAM75A1 | 37805667 | 0  |
| CEU | chr9 | FAM75A1 | 37855667 | 0  |
| CEU | chr9 | FAM75A1 | 37905667 | 0  |
| CEU | chr9 | FAM75A1 | 37955667 | 0  |
| CEU | chr9 | FAM75A1 | 38005667 | 0  |
| CEU | chr9 | FAM75A1 | 38055667 | 0  |
| CEU | chr9 | FAM75A1 | 38105667 | 0  |
| CEU | chr9 | FAM75A1 | 38155667 | 0  |
| CEU | chr9 | FAM75A1 | 38205667 | 0  |
| CEU | chr9 | FAM75A1 | 38255667 | 0  |
| CEU | chr9 | FAM75A1 | 38305667 | 0  |
| CEU | chr9 | FAM75A1 | 38355667 | 0  |
| CEU | chr9 | FAM75A1 | 38405667 | 0  |
| CEU | chr9 | FAM75A1 | 38455667 | 0  |
| CEU | chr9 | FAM75A1 | 38505667 | 0  |
| CEU | chr9 | FAM75A1 | 38555667 | 0  |
| CEU | chr9 | FAM75A1 | 38605667 | 0  |
| CEU | chr9 | FAM75A1 | 38655667 | 0  |
| CEU | chr9 | FAM75A1 | 38705667 | 0  |
| CEU | chr9 | FAM75A1 | 38755667 | 0  |
| CEU | chr9 | FAM75A1 | 38805667 | 0  |
| CEU | chr9 | FAM75A1 | 38855667 | 0  |
| CEU | chr9 | FAM75A1 | 38905667 | 0  |
| CEU | chr9 | FAM75A1 | 38955667 | 0  |
| CEU | chr9 | FAM75A1 | 39005667 | 0  |
| CEU | chr9 | FAM75A1 | 39055667 | 2  |
| CEU | chr9 | FAM75A1 | 39105667 | 53 |
| CEU | chr9 | FAM75A1 | 39155667 | 66 |
| CEU | chr9 | FAM75A1 | 39205667 | 15 |
| CEU | chr9 | FAM75A1 | 39255667 | 0  |
| CEU | chr9 | FAM75A1 | 39305667 | 0  |
| CEU | chr9 | FAM75A1 | 39355667 | 0  |
| CEU | chr9 | FAM75A1 | 39405667 | 0  |

## 3\_Introgression\_data

|     |      |         |          |    |
|-----|------|---------|----------|----|
| CEU | chr9 | FAM75A1 | 39455667 | 0  |
| CEU | chr9 | FAM75A1 | 39505667 | 0  |
| CEU | chr9 | FAM75A1 | 39555667 | 0  |
| CEU | chr9 | FAM75A1 | 39605667 | 0  |
| CEU | chr9 | FAM75A1 | 39655667 | 0  |
| CEU | chr9 | FAM75A1 | 39705667 | 0  |
| CEU | chr9 | FAM75A1 | 39755667 | 0  |
| CEU | chr9 | FAM75A1 | 39805667 | 0  |
| CEU | chr9 | FAM75A1 | 39855667 | 0  |
| CEU | chr9 | FAM75A1 | 39905667 | 0  |
| CEU | chr9 | FAM75A1 | 39955667 | 0  |
| CEU | chr9 | FAM75A1 | 40005667 | 0  |
| CEU | chr9 | FAM75A1 | 40055667 | 0  |
| CEU | chr9 | FAM75A1 | 40105667 | 0  |
| CEU | chr9 | FAM75A1 | 40155667 | 0  |
| CEU | chr9 | FAM75A1 | 40205667 | 0  |
| CEU | chr9 | FAM75A1 | 40255667 | 0  |
| CEU | chr9 | FAM75A1 | 40305667 | 0  |
| CEU | chr9 | FAM75A1 | 40355667 | 0  |
| CEU | chr9 | FAM75A1 | 40405667 | 0  |
| CEU | chr9 | FAM75A1 | 40455667 | 0  |
| CEU | chr9 | FAM75A1 | 40505667 | 6  |
| CEU | chr9 | FAM75A1 | 40555667 | 14 |
| CEU | chr9 | FAM75A1 | 40605667 | 29 |
| CEU | chr9 | FAM75A1 | 40655667 | 21 |
| CEU | chr9 | FAM75A1 | 40705667 | 8  |
| CEU | chr9 | FAM75A1 | 40755667 | 20 |
| CEU | chr9 | FAM75A1 | 40805667 | 24 |
| CEU | chr9 | FAM75A1 | 40855667 | 12 |
| CEU | chr9 | FAM75A1 | 40905667 | 0  |
| CEU | chr9 | FAM75A1 | 40955667 | 0  |
| CEU | chr9 | FAM75A1 | 41005667 | 0  |
| CEU | chr9 | FAM75A1 | 41055667 | 0  |
| CEU | chr9 | FAM75A1 | 41105667 | 0  |
| CEU | chr9 | FAM75A1 | 41155667 | 0  |
| CEU | chr9 | FAM75A1 | 41205667 | 0  |
| CEU | chr9 | FAM75A1 | 41255667 | 0  |
| CEU | chr9 | FAM75A1 | 41305667 | 0  |
| CEU | chr9 | FAM75A1 | 41355667 | 0  |
| CEU | chr9 | FAM75A1 | 41405667 | 0  |
| CEU | chr9 | FAM75A1 | 41455667 | 0  |
| CEU | chr9 | FAM75A1 | 41505667 | 0  |
| CEU | chr9 | FAM75A1 | 41555667 | 0  |
| CEU | chr9 | FAM75A1 | 41605667 | 0  |
| CEU | chr9 | FAM75A1 | 41655667 | 0  |
| CEU | chr9 | FAM75A1 | 41705667 | 0  |
| CEU | chr9 | FAM75A1 | 41755667 | 0  |
| CEU | chr9 | FAM75A1 | 41805667 | 0  |
| CEU | chr9 | FAM75A1 | 41855667 | 0  |

## 3\_Introgression\_data

|     |      |         |          |   |
|-----|------|---------|----------|---|
| CEU | chr9 | FAM75A1 | 41905667 | 0 |
| CEU | chr9 | FAM75A1 | 41955667 | 0 |
| CEU | chr9 | FAM75A1 | 42005667 | 0 |
| CEU | chr9 | FAM75A1 | 42055667 | 0 |
| CEU | chr9 | FAM75A1 | 42105667 | 0 |
| CEU | chr9 | FAM75A1 | 42155667 | 0 |
| CEU | chr9 | FAM75A1 | 42205667 | 0 |
| CEU | chr9 | FAM75A1 | 42255667 | 0 |
| CEU | chr9 | FAM75A1 | 42305667 | 0 |
| CEU | chr9 | FAM75A1 | 42355667 | 0 |
| CEU | chr9 | FAM75A1 | 42405667 | 0 |
| CEU | chr9 | FAM75A1 | 42455667 | 0 |
| CEU | chr9 | FAM75A1 | 42505667 | 0 |
| CEU | chr9 | FAM75A1 | 42555667 | 0 |
| CEU | chr9 | FAM75A1 | 42605667 | 0 |
| CEU | chr9 | FAM75A1 | 42655667 | 0 |
| CEU | chr9 | FAM75A1 | 42705667 | 0 |
| CEU | chr9 | FAM75A1 | 42755667 | 0 |
| CEU | chr9 | FAM75A1 | 42805667 | 0 |
| CEU | chr9 | FAM75A1 | 42855667 | 0 |
| CEU | chr9 | FAM75A1 | 42905667 | 0 |
| CEU | chr9 | FAM75A1 | 42955667 | 0 |
| CEU | chr9 | FAM75A1 | 43005667 | 0 |
| CEU | chr9 | FAM75A1 | 43055667 | 0 |
| CEU | chr9 | FAM75A1 | 43105667 | 0 |
| CEU | chr9 | FAM75A1 | 43155667 | 0 |
| CEU | chr9 | FAM75A1 | 43205667 | 0 |
| CEU | chr9 | FAM75A1 | 43255667 | 0 |
| CEU | chr9 | FAM75A1 | 43305667 | 0 |
| CEU | chr9 | FAM75A1 | 43355667 | 0 |
| CEU | chr9 | FAM75A1 | 43405667 | 0 |
| CEU | chr9 | FAM75A1 | 43455667 | 0 |
| CEU | chr9 | FAM75A1 | 43505667 | 0 |
| CEU | chr9 | FAM75A1 | 43555667 | 0 |
| CEU | chr9 | FAM75A1 | 43605667 | 0 |
| CEU | chr9 | FAM75A1 | 43655667 | 0 |
| CEU | chr9 | FAM75A1 | 43705667 | 0 |
| CEU | chr9 | FAM75A1 | 43755667 | 0 |
| CEU | chr9 | FAM75A1 | 43805667 | 0 |
| CEU | chr9 | FAM75A1 | 43855667 | 0 |
| CEU | chr9 | FAM75A1 | 43905667 | 0 |
| CEU | chr9 | FAM75A1 | 43955667 | 0 |
| CEU | chr9 | FAM75A1 | 44005667 | 0 |
| CEU | chr9 | FAM75A1 | 44055667 | 0 |
| CEU | chr9 | FAM75A1 | 44105667 | 0 |
| CEU | chr9 | FAM75A1 | 44155667 | 0 |
| CEU | chr9 | FAM75A1 | 44205667 | 0 |
| CEU | chr9 | FAM75A1 | 44255667 | 0 |
| CEU | chr9 | FAM75A1 | 44305667 | 0 |

## 3\_Introgression\_data

|     |      |         |          |   |
|-----|------|---------|----------|---|
| CEU | chr9 | FAM75A5 | 55964372 | 0 |
| CEU | chr9 | FAM75A5 | 56014372 | 0 |
| CEU | chr9 | FAM75A5 | 56064372 | 0 |
| CEU | chr9 | FAM75A5 | 56114372 | 0 |
| CEU | chr9 | FAM75A5 | 56164372 | 0 |
| CEU | chr9 | FAM75A5 | 56214372 | 0 |
| CEU | chr9 | FAM75A5 | 56264372 | 0 |
| CEU | chr9 | FAM75A5 | 56314372 | 0 |
| CEU | chr9 | FAM75A5 | 56364372 | 0 |
| CEU | chr9 | FAM75A5 | 56414372 | 0 |
| CEU | chr9 | FAM75A5 | 56464372 | 0 |
| CEU | chr9 | FAM75A5 | 56514372 | 0 |
| CEU | chr9 | FAM75A5 | 56564372 | 0 |
| CEU | chr9 | FAM75A5 | 56614372 | 0 |
| CEU | chr9 | FAM75A5 | 56664372 | 0 |
| CEU | chr9 | FAM75A5 | 56714372 | 0 |
| CEU | chr9 | FAM75A5 | 56764372 | 0 |
| CEU | chr9 | FAM75A5 | 56814372 | 0 |
| CEU | chr9 | FAM75A5 | 56864372 | 0 |
| CEU | chr9 | FAM75A5 | 56914372 | 0 |
| CEU | chr9 | FAM75A5 | 56964372 | 0 |
| CEU | chr9 | FAM75A5 | 57014372 | 0 |
| CEU | chr9 | FAM75A5 | 57064372 | 0 |
| CEU | chr9 | FAM75A5 | 57114372 | 0 |
| CEU | chr9 | FAM75A5 | 57164372 | 0 |
| CEU | chr9 | FAM75A5 | 57214372 | 0 |
| CEU | chr9 | FAM75A5 | 57264372 | 0 |
| CEU | chr9 | FAM75A5 | 57314372 | 0 |
| CEU | chr9 | FAM75A5 | 57364372 | 0 |
| CEU | chr9 | FAM75A5 | 57414372 | 0 |
| CEU | chr9 | FAM75A5 | 57464372 | 0 |
| CEU | chr9 | FAM75A5 | 57514372 | 0 |
| CEU | chr9 | FAM75A5 | 57564372 | 0 |
| CEU | chr9 | FAM75A5 | 57614372 | 0 |
| CEU | chr9 | FAM75A5 | 57664372 | 0 |
| CEU | chr9 | FAM75A5 | 57714372 | 0 |
| CEU | chr9 | FAM75A5 | 57764372 | 0 |
| CEU | chr9 | FAM75A5 | 57814372 | 0 |
| CEU | chr9 | FAM75A5 | 57864372 | 0 |
| CEU | chr9 | FAM75A5 | 57914372 | 0 |
| CEU | chr9 | FAM75A5 | 57964372 | 0 |
| CEU | chr9 | FAM75A5 | 58014372 | 0 |
| CEU | chr9 | FAM75A5 | 58064372 | 0 |
| CEU | chr9 | FAM75A5 | 58114372 | 0 |
| CEU | chr9 | FAM75A5 | 58164372 | 0 |
| CEU | chr9 | FAM75A5 | 58214372 | 0 |
| CEU | chr9 | FAM75A5 | 58264372 | 0 |
| CEU | chr9 | FAM75A5 | 58314372 | 0 |
| CEU | chr9 | FAM75A5 | 58364372 | 0 |

3\_Introgression\_data

|     |      |         |          |   |
|-----|------|---------|----------|---|
| CEU | chr9 | FAM75A5 | 58414372 | 0 |
| CEU | chr9 | FAM75A5 | 58464372 | 0 |
| CEU | chr9 | FAM75A5 | 58514372 | 0 |
| CEU | chr9 | FAM75A5 | 58564372 | 0 |
| CEU | chr9 | FAM75A5 | 58614372 | 0 |
| CEU | chr9 | FAM75A5 | 58664372 | 0 |
| CEU | chr9 | FAM75A5 | 58714372 | 0 |
| CEU | chr9 | FAM75A5 | 58764372 | 0 |
| CEU | chr9 | FAM75A5 | 58814372 | 0 |
| CEU | chr9 | FAM75A5 | 58864372 | 0 |
| CEU | chr9 | FAM75A5 | 58914372 | 0 |
| CEU | chr9 | FAM75A5 | 58964372 | 0 |
| CEU | chr9 | FAM75A5 | 59014372 | 0 |
| CEU | chr9 | FAM75A5 | 59064372 | 0 |
| CEU | chr9 | FAM75A5 | 59114372 | 0 |
| CEU | chr9 | FAM75A5 | 59164372 | 0 |
| CEU | chr9 | FAM75A5 | 59214372 | 0 |
| CEU | chr9 | FAM75A5 | 59264372 | 0 |
| CEU | chr9 | FAM75A5 | 59314372 | 0 |
| CEU | chr9 | FAM75A5 | 59364372 | 0 |
| CEU | chr9 | FAM75A5 | 59414372 | 0 |
| CEU | chr9 | FAM75A5 | 59464372 | 0 |
| CEU | chr9 | FAM75A5 | 59514372 | 0 |
| CEU | chr9 | FAM75A5 | 59564372 | 0 |
| CEU | chr9 | FAM75A5 | 59614372 | 0 |
| CEU | chr9 | FAM75A5 | 59664372 | 0 |
| CEU | chr9 | FAM75A5 | 59714372 | 0 |
| CEU | chr9 | FAM75A5 | 59764372 | 0 |
| CEU | chr9 | FAM75A5 | 59814372 | 0 |
| CEU | chr9 | FAM75A5 | 59864372 | 0 |
| CEU | chr9 | FAM75A5 | 59914372 | 0 |
| CEU | chr9 | FAM75A5 | 59964372 | 0 |
| CEU | chr9 | FAM75A5 | 60014372 | 0 |
| CEU | chr9 | FAM75A5 | 60064372 | 0 |
| CEU | chr9 | FAM75A5 | 60114372 | 0 |
| CEU | chr9 | FAM75A5 | 60164372 | 0 |
| CEU | chr9 | FAM75A5 | 60214372 | 0 |
| CEU | chr9 | FAM75A5 | 60264372 | 0 |
| CEU | chr9 | FAM75A5 | 60314372 | 0 |
| CEU | chr9 | FAM75A5 | 60364372 | 0 |
| CEU | chr9 | FAM75A5 | 60414372 | 0 |
| CEU | chr9 | FAM75A5 | 60464372 | 0 |
| CEU | chr9 | FAM75A5 | 60514372 | 0 |
| CEU | chr9 | FAM75A5 | 60564372 | 0 |
| CEU | chr9 | FAM75A5 | 60614372 | 0 |
| CEU | chr9 | FAM75A5 | 60664372 | 0 |
| CEU | chr9 | FAM75A5 | 60714372 | 0 |
| CEU | chr9 | FAM75A5 | 60764372 | 0 |
| CEU | chr9 | FAM75A5 | 60814372 | 0 |

## 3\_Introgression\_data

|     |      |         |          |   |
|-----|------|---------|----------|---|
| CEU | chr9 | FAM75A5 | 60864372 | 0 |
| CEU | chr9 | FAM75A5 | 60914372 | 0 |
| CEU | chr9 | FAM75A5 | 60964372 | 0 |
| CEU | chr9 | FAM75A5 | 61014372 | 0 |
| CEU | chr9 | FAM75A5 | 61064372 | 0 |
| CEU | chr9 | FAM75A5 | 61114372 | 0 |
| CEU | chr9 | FAM75A5 | 61164372 | 0 |
| CEU | chr9 | FAM75A5 | 61214372 | 0 |
| CEU | chr9 | FAM75A5 | 61264372 | 0 |
| CEU | chr9 | FAM75A5 | 61314372 | 0 |
| CEU | chr9 | FAM75A5 | 61364372 | 0 |
| CEU | chr9 | FAM75A5 | 61414372 | 0 |
| CEU | chr9 | FAM75A5 | 61464372 | 0 |
| CEU | chr9 | FAM75A5 | 61514372 | 0 |
| CEU | chr9 | FAM75A5 | 61564372 | 0 |
| CEU | chr9 | FAM75A5 | 61614372 | 0 |
| CEU | chr9 | FAM75A5 | 61664372 | 0 |
| CEU | chr9 | FAM75A5 | 61714372 | 0 |
| CEU | chr9 | FAM75A5 | 61764372 | 0 |
| CEU | chr9 | FAM75A5 | 61814372 | 0 |
| CEU | chr9 | FAM75A5 | 61864372 | 0 |
| CEU | chr9 | FAM75A5 | 61914372 | 0 |
| CEU | chr9 | FAM75A5 | 61964372 | 0 |
| CEU | chr9 | FAM75A5 | 62014372 | 0 |
| CEU | chr9 | FAM75A5 | 62064372 | 0 |
| CEU | chr9 | FAM75A5 | 62114372 | 0 |
| CEU | chr9 | FAM75A5 | 62164372 | 0 |
| CEU | chr9 | FAM75A5 | 62214372 | 0 |
| CEU | chr9 | FAM75A5 | 62264372 | 0 |
| CEU | chr9 | FAM75A5 | 62314372 | 0 |
| CEU | chr9 | FAM75A5 | 62364372 | 0 |
| CEU | chr9 | FAM75A5 | 62414372 | 0 |
| CEU | chr9 | FAM75A5 | 62464372 | 0 |
| CEU | chr9 | FAM75A5 | 62514372 | 0 |
| CEU | chr9 | FAM75A5 | 62564372 | 0 |
| CEU | chr9 | FAM75A5 | 62614372 | 0 |
| CEU | chr9 | FAM75A5 | 62664372 | 0 |
| CEU | chr9 | FAM75A5 | 62714372 | 0 |
| CEU | chr9 | FAM75A5 | 62764372 | 0 |
| CEU | chr9 | FAM75A5 | 62814372 | 0 |
| CEU | chr9 | FAM75A5 | 62864372 | 0 |
| CEU | chr9 | FAM75A5 | 62914372 | 0 |
| CEU | chr9 | FAM75A5 | 62964372 | 0 |
| CEU | chr9 | FAM75A5 | 63014372 | 0 |
| CEU | chr9 | FAM75A5 | 63064372 | 0 |
| CEU | chr9 | FAM75A5 | 63114372 | 0 |
| CEU | chr9 | FAM75A5 | 63164372 | 0 |
| CEU | chr9 | FAM75A5 | 63214372 | 0 |
| CEU | chr9 | FAM75A5 | 63264372 | 0 |



## 3\_Introgression\_data

|     |      |         |          |    |
|-----|------|---------|----------|----|
| CEU | chr9 | FAM75A5 | 63314372 | 0  |
| CEU | chr9 | FAM75A5 | 63364372 | 0  |
| CEU | chr9 | FAM75A5 | 63414372 | 0  |
| CEU | chr9 | FAM75A5 | 63464372 | 0  |
| CEU | chr9 | FAM75A5 | 63514372 | 0  |
| CEU | chr9 | FAM75A5 | 63564372 | 0  |
| CEU | chr9 | FAM75A5 | 63614372 | 0  |
| CEU | chr9 | FAM75A5 | 63664372 | 0  |
| CEU | chr9 | FAM75A5 | 63714372 | 0  |
| CEU | chr9 | FAM75A5 | 63764372 | 0  |
| CEU | chr9 | FAM75A5 | 63814372 | 0  |
| CEU | chr9 | FAM75A5 | 63864372 | 0  |
| CEU | chr9 | FAM75A5 | 63914372 | 0  |
| CEU | chr9 | FAM75A5 | 63964372 | 0  |
| CEU | chr9 | FAM75A5 | 64014372 | 0  |
| CEU | chr9 | FAM75A5 | 64064372 | 0  |
| CEU | chr9 | FAM75A5 | 64114372 | 0  |
| CEU | chr9 | FAM75A5 | 64164372 | 0  |
| CEU | chr9 | FAM75A5 | 64214372 | 0  |
| CEU | chr9 | FAM75A5 | 64264372 | 0  |
| CEU | chr9 | FAM75A5 | 64314372 | 0  |
| CEU | chr9 | FAM75A5 | 64364372 | 0  |
| CEU | chr9 | FAM75A5 | 64414372 | 0  |
| CEU | chr9 | FAM75A5 | 64464372 | 0  |
| CEU | chr9 | FAM75A5 | 64514372 | 0  |
| CEU | chr9 | FAM75A5 | 64564372 | 0  |
| CEU | chr9 | FAM75A5 | 64614372 | 0  |
| CEU | chr9 | FAM75A5 | 64664372 | 0  |
| CEU | chr9 | FAM75A5 | 64714372 | 0  |
| CEU | chr9 | FAM75A5 | 64764372 | 0  |
| CEU | chr9 | FAM75A5 | 64814372 | 0  |
| CEU | chr9 | FAM75A5 | 64864372 | 0  |
| CEU | chr9 | FAM75A5 | 64914372 | 0  |
| CEU | chr9 | FAM75A5 | 64964372 | 0  |
| CEU | chr9 | FAM75A5 | 65014372 | 0  |
| CEU | chr9 | FAM75A5 | 65064372 | 0  |
| CEU | chr9 | FAM75A5 | 65114372 | 0  |
| CEU | chr9 | FAM75A5 | 65164372 | 0  |
| CEU | chr9 | FAM75A5 | 65214372 | 0  |
| CEU | chr9 | FAM75A5 | 65264372 | 0  |
| CEU | chr9 | FAM75A5 | 65314372 | 0  |
| CEU | chr9 | FAM75A5 | 65364372 | 0  |
| CEU | chr9 | FAM75A5 | 65414372 | 0  |
| CEU | chr9 | FAM75A5 | 65464372 | 0  |
| CEU | chr9 | FAM75A5 | 65514372 | 0  |
| CEU | chr9 | FAM75A5 | 65564372 | 13 |
| CEU | chr9 | FAM75A5 | 65614372 | 27 |
| CEU | chr9 | FAM75A5 | 65664372 | 14 |
| CEU | chr9 | FAM75A5 | 65714372 | 0  |

## 3\_Introgression\_data

|     |      |         |          |   |
|-----|------|---------|----------|---|
| CEU | chr9 | FAM75A5 | 65764372 | 0 |
| CEU | chr9 | FAM75A5 | 65814372 | 0 |
| CEU | chr9 | FAM75A5 | 65864372 | 0 |
| CEU | chr9 | FOXD4L2 | 60787146 | 0 |
| CEU | chr9 | FOXD4L2 | 60837146 | 0 |
| CEU | chr9 | FOXD4L2 | 60887146 | 0 |
| CEU | chr9 | FOXD4L2 | 60937146 | 0 |
| CEU | chr9 | FOXD4L2 | 60987146 | 0 |
| CEU | chr9 | FOXD4L2 | 61037146 | 0 |
| CEU | chr9 | FOXD4L2 | 61087146 | 0 |
| CEU | chr9 | FOXD4L2 | 61137146 | 0 |
| CEU | chr9 | FOXD4L2 | 61187146 | 0 |
| CEU | chr9 | FOXD4L2 | 61237146 | 0 |
| CEU | chr9 | FOXD4L2 | 61287146 | 0 |
| CEU | chr9 | FOXD4L2 | 61337146 | 0 |
| CEU | chr9 | FOXD4L2 | 61387146 | 0 |
| CEU | chr9 | FOXD4L2 | 61437146 | 0 |
| CEU | chr9 | FOXD4L2 | 61487146 | 0 |
| CEU | chr9 | FOXD4L2 | 61537146 | 0 |
| CEU | chr9 | FOXD4L2 | 61587146 | 0 |
| CEU | chr9 | FOXD4L2 | 61637146 | 0 |
| CEU | chr9 | FOXD4L2 | 61687146 | 0 |
| CEU | chr9 | FOXD4L2 | 61737146 | 0 |
| CEU | chr9 | FOXD4L2 | 61787146 | 0 |
| CEU | chr9 | FOXD4L2 | 61837146 | 0 |
| CEU | chr9 | FOXD4L2 | 61887146 | 0 |
| CEU | chr9 | FOXD4L2 | 61937146 | 0 |
| CEU | chr9 | FOXD4L2 | 61987146 | 0 |
| CEU | chr9 | FOXD4L2 | 62037146 | 0 |
| CEU | chr9 | FOXD4L2 | 62087146 | 0 |
| CEU | chr9 | FOXD4L2 | 62137146 | 0 |
| CEU | chr9 | FOXD4L2 | 62187146 | 0 |
| CEU | chr9 | FOXD4L2 | 62237146 | 0 |
| CEU | chr9 | FOXD4L2 | 62287146 | 0 |
| CEU | chr9 | FOXD4L2 | 62337146 | 0 |
| CEU | chr9 | FOXD4L2 | 62387146 | 0 |
| CEU | chr9 | FOXD4L2 | 62437146 | 0 |
| CEU | chr9 | FOXD4L2 | 62487146 | 0 |
| CEU | chr9 | FOXD4L2 | 62537146 | 0 |
| CEU | chr9 | FOXD4L2 | 62587146 | 0 |
| CEU | chr9 | FOXD4L2 | 62637146 | 0 |
| CEU | chr9 | FOXD4L2 | 62687146 | 0 |
| CEU | chr9 | FOXD4L2 | 62737146 | 0 |
| CEU | chr9 | FOXD4L2 | 62787146 | 0 |
| CEU | chr9 | FOXD4L2 | 62837146 | 0 |
| CEU | chr9 | FOXD4L2 | 62887146 | 0 |
| CEU | chr9 | FOXD4L2 | 62937146 | 0 |
| CEU | chr9 | FOXD4L2 | 62987146 | 0 |
| CEU | chr9 | FOXD4L2 | 63037146 | 0 |

3\_Introgression\_data

|     |      |         |          |   |
|-----|------|---------|----------|---|
| CEU | chr9 | FOXD4L2 | 63087146 | 0 |
| CEU | chr9 | FOXD4L2 | 63137146 | 0 |
| CEU | chr9 | FOXD4L2 | 63187146 | 0 |
| CEU | chr9 | FOXD4L2 | 63237146 | 0 |
| CEU | chr9 | FOXD4L2 | 63287146 | 0 |
| CEU | chr9 | FOXD4L2 | 63337146 | 0 |
| CEU | chr9 | FOXD4L2 | 63387146 | 0 |
| CEU | chr9 | FOXD4L2 | 63437146 | 0 |
| CEU | chr9 | FOXD4L2 | 63487146 | 0 |
| CEU | chr9 | FOXD4L2 | 63537146 | 0 |
| CEU | chr9 | FOXD4L2 | 63587146 | 0 |
| CEU | chr9 | FOXD4L2 | 63637146 | 0 |
| CEU | chr9 | FOXD4L2 | 63687146 | 0 |
| CEU | chr9 | FOXD4L2 | 63737146 | 0 |
| CEU | chr9 | FOXD4L2 | 63787146 | 0 |
| CEU | chr9 | FOXD4L2 | 63837146 | 0 |
| CEU | chr9 | FOXD4L2 | 63887146 | 0 |
| CEU | chr9 | FOXD4L2 | 63937146 | 0 |
| CEU | chr9 | FOXD4L2 | 63987146 | 0 |
| CEU | chr9 | FOXD4L2 | 64037146 | 0 |
| CEU | chr9 | FOXD4L2 | 64087146 | 0 |
| CEU | chr9 | FOXD4L2 | 64137146 | 0 |
| CEU | chr9 | FOXD4L2 | 64187146 | 0 |
| CEU | chr9 | FOXD4L2 | 64237146 | 0 |
| CEU | chr9 | FOXD4L2 | 64287146 | 0 |
| CEU | chr9 | FOXD4L2 | 64337146 | 0 |
| CEU | chr9 | FOXD4L2 | 64387146 | 0 |
| CEU | chr9 | FOXD4L2 | 64437146 | 0 |
| CEU | chr9 | FOXD4L2 | 64487146 | 0 |
| CEU | chr9 | FOXD4L2 | 64537146 | 0 |
| CEU | chr9 | FOXD4L2 | 64587146 | 0 |
| CEU | chr9 | FOXD4L2 | 64637146 | 0 |
| CEU | chr9 | FOXD4L2 | 64687146 | 0 |
| CEU | chr9 | FOXD4L2 | 64737146 | 0 |
| CEU | chr9 | FOXD4L2 | 64787146 | 0 |
| CEU | chr9 | FOXD4L2 | 64837146 | 0 |
| CEU | chr9 | FOXD4L2 | 64887146 | 0 |
| CEU | chr9 | FOXD4L2 | 64937146 | 0 |
| CEU | chr9 | FOXD4L2 | 64987146 | 0 |
| CEU | chr9 | FOXD4L2 | 65037146 | 0 |
| CEU | chr9 | FOXD4L2 | 65087146 | 0 |
| CEU | chr9 | FOXD4L2 | 65137146 | 0 |
| CEU | chr9 | FOXD4L2 | 65187146 | 0 |
| CEU | chr9 | FOXD4L2 | 65237146 | 0 |
| CEU | chr9 | FOXD4L2 | 65287146 | 0 |
| CEU | chr9 | FOXD4L2 | 65337146 | 0 |
| CEU | chr9 | FOXD4L2 | 65387146 | 0 |
| CEU | chr9 | FOXD4L2 | 65437146 | 0 |
| CEU | chr9 | FOXD4L2 | 65487146 | 0 |

### 3\_Introgression\_data

|     |      |         |          |    |
|-----|------|---------|----------|----|
| CEU | chr9 | FOXD4L2 | 65537146 | 0  |
| CEU | chr9 | FOXD4L2 | 65587146 | 26 |
| CEU | chr9 | FOXD4L2 | 65637146 | 27 |
| CEU | chr9 | FOXD4L2 | 65687146 | 1  |
| CEU | chr9 | FOXD4L2 | 65737146 | 0  |
| CEU | chr9 | FOXD4L2 | 65787146 | 0  |
| CEU | chr9 | FOXD4L2 | 65837146 | 0  |
| CEU | chr9 | FOXD4L2 | 65887146 | 0  |
| CEU | chr9 | FOXD4L2 | 65937146 | 0  |
| CEU | chr9 | FOXD4L2 | 65987146 | 0  |
| CEU | chr9 | FOXD4L2 | 66037146 | 0  |
| CEU | chr9 | FOXD4L2 | 66087146 | 0  |
| CEU | chr9 | FOXD4L2 | 66137146 | 0  |
| CEU | chr9 | FOXD4L2 | 66187146 | 0  |
| CEU | chr9 | FOXD4L2 | 66237146 | 0  |
| CEU | chr9 | FOXD4L2 | 66287146 | 0  |
| CEU | chr9 | FOXD4L2 | 66337146 | 0  |
| CEU | chr9 | FOXD4L2 | 66387146 | 0  |
| CEU | chr9 | FOXD4L2 | 66437146 | 0  |
| CEU | chr9 | FOXD4L2 | 66487146 | 0  |
| CEU | chr9 | FOXD4L2 | 66537146 | 0  |
| CEU | chr9 | FOXD4L2 | 66587146 | 0  |
| CEU | chr9 | FOXD4L2 | 66637146 | 10 |
| CEU | chr9 | FOXD4L2 | 66687146 | 19 |
| CEU | chr9 | FOXD4L2 | 66737146 | 18 |
| CEU | chr9 | FOXD4L2 | 66787146 | 22 |
| CEU | chr9 | FOXD4L2 | 66837146 | 13 |
| CEU | chr9 | FOXD4L2 | 66887146 | 0  |
| CEU | chr9 | FOXD4L2 | 66937146 | 0  |
| CEU | chr9 | FOXD4L2 | 66987146 | 0  |
| CEU | chr9 | FOXD4L2 | 67037146 | 0  |
| CEU | chr9 | FOXD4L2 | 67087146 | 0  |
| CEU | chr9 | FOXD4L2 | 67137146 | 0  |
| CEU | chr9 | FOXD4L2 | 67187146 | 0  |
| CEU | chr9 | FOXD4L2 | 67237146 | 0  |
| CEU | chr9 | FOXD4L2 | 67287146 | 0  |
| CEU | chr9 | FOXD4L2 | 67337146 | 0  |
| CEU | chr9 | FOXD4L2 | 67387146 | 0  |
| CEU | chr9 | FOXD4L2 | 67437146 | 0  |
| CEU | chr9 | FOXD4L2 | 67487146 | 0  |
| CEU | chr9 | FOXD4L2 | 67537146 | 0  |
| CEU | chr9 | FOXD4L2 | 67587146 | 0  |
| CEU | chr9 | FOXD4L2 | 67637146 | 0  |
| CEU | chr9 | FOXD4L2 | 67687146 | 0  |
| CEU | chr9 | FOXD4L2 | 67737146 | 0  |
| CEU | chr9 | FOXD4L2 | 67787146 | 0  |
| CEU | chr9 | FOXD4L2 | 67837146 | 0  |
| CEU | chr9 | FOXD4L2 | 67887146 | 0  |
| CEU | chr9 | FOXD4L2 | 67937146 | 0  |

## 3\_Introgression\_data

|     |      |         |          |    |
|-----|------|---------|----------|----|
| CEU | chr9 | FOXD4L2 | 67987146 | 0  |
| CEU | chr9 | FOXD4L2 | 68037146 | 0  |
| CEU | chr9 | FOXD4L2 | 68087146 | 0  |
| CEU | chr9 | FOXD4L2 | 68137146 | 0  |
| CEU | chr9 | FOXD4L2 | 68187146 | 0  |
| CEU | chr9 | FOXD4L2 | 68237146 | 0  |
| CEU | chr9 | FOXD4L2 | 68287146 | 0  |
| CEU | chr9 | FOXD4L2 | 68337146 | 0  |
| CEU | chr9 | FOXD4L2 | 68387146 | 0  |
| CEU | chr9 | FOXD4L2 | 68437146 | 0  |
| CEU | chr9 | FOXD4L2 | 68487146 | 0  |
| CEU | chr9 | FOXD4L2 | 68537146 | 0  |
| CEU | chr9 | FOXD4L2 | 68587146 | 0  |
| CEU | chr9 | FOXD4L2 | 68637146 | 0  |
| CEU | chr9 | FOXD4L2 | 68687146 | 0  |
| CEU | chr9 | FOXD4L2 | 68737146 | 0  |
| CEU | chr9 | FOXD4L2 | 68787146 | 0  |
| CEU | chr9 | FOXD4L2 | 68837146 | 0  |
| CEU | chr9 | FOXD4L2 | 68887146 | 0  |
| CEU | chr9 | FOXD4L2 | 68937146 | 0  |
| CEU | chr9 | FOXD4L2 | 68987146 | 0  |
| CEU | chr9 | FOXD4L2 | 69037146 | 0  |
| CEU | chr9 | FOXD4L2 | 69087146 | 0  |
| CEU | chr9 | FOXD4L2 | 69137146 | 0  |
| CEU | chr9 | FOXD4L2 | 69187146 | 0  |
| CEU | chr9 | FOXD4L2 | 69237146 | 0  |
| CEU | chr9 | FOXD4L2 | 69287146 | 0  |
| CEU | chr9 | FOXD4L2 | 69337146 | 0  |
| CEU | chr9 | FOXD4L2 | 69387146 | 0  |
| CEU | chr9 | FOXD4L2 | 69437146 | 0  |
| CEU | chr9 | FOXD4L2 | 69487146 | 0  |
| CEU | chr9 | FOXD4L2 | 69537146 | 0  |
| CEU | chr9 | FOXD4L2 | 69587146 | 0  |
| CEU | chr9 | FOXD4L2 | 69637146 | 0  |
| CEU | chr9 | FOXD4L2 | 69687146 | 0  |
| CEU | chr9 | FOXD4L2 | 69737146 | 0  |
| CEU | chr9 | FOXD4L2 | 69787146 | 4  |
| CEU | chr9 | FOXD4L2 | 69837146 | 35 |
| CEU | chr9 | FOXD4L2 | 69887146 | 53 |
| CEU | chr9 | FOXD4L2 | 69937146 | 54 |
| CEU | chr9 | FOXD4L2 | 69987146 | 40 |
| CEU | chr9 | FOXD4L2 | 70037146 | 8  |
| CEU | chr9 | FOXD4L2 | 70087146 | 0  |
| CEU | chr9 | FOXD4L2 | 70137146 | 0  |
| CEU | chr9 | FOXD4L2 | 70187146 | 0  |
| CEU | chr9 | FOXD4L2 | 70237146 | 0  |
| CEU | chr9 | FOXD4L2 | 70287146 | 0  |
| CEU | chr9 | FOXD4L2 | 70337146 | 0  |
| CEU | chr9 | FOXD4L2 | 70387146 | 0  |

## 3\_Introgression\_data

|     |       |          |          |    |
|-----|-------|----------|----------|----|
| CEU | chr9  | FOXD4L2  | 70437146 | 0  |
| CEU | chr9  | FOXD4L2  | 70487146 | 0  |
| CEU | chr9  | FOXD4L2  | 70537146 | 0  |
| CEU | chr9  | FOXD4L2  | 70587146 | 0  |
| CEU | chr9  | FOXD4L2  | 70637146 | 0  |
| CEU | chr9  | FOXD4L2  | 70687146 | 0  |
| CEU | chr15 | GOLGA6L9 | 77479363 | 0  |
| CEU | chr15 | GOLGA6L9 | 77529363 | 0  |
| CEU | chr15 | GOLGA6L9 | 77579363 | 0  |
| CEU | chr15 | GOLGA6L9 | 77629363 | 0  |
| CEU | chr15 | GOLGA6L9 | 77679363 | 0  |
| CEU | chr15 | GOLGA6L9 | 77729363 | 0  |
| CEU | chr15 | GOLGA6L9 | 77779363 | 0  |
| CEU | chr15 | GOLGA6L9 | 77829363 | 0  |
| CEU | chr15 | GOLGA6L9 | 77879363 | 0  |
| CEU | chr15 | GOLGA6L9 | 77929363 | 0  |
| CEU | chr15 | GOLGA6L9 | 77979363 | 0  |
| CEU | chr15 | GOLGA6L9 | 78029363 | 0  |
| CEU | chr15 | GOLGA6L9 | 78079363 | 0  |
| CEU | chr15 | GOLGA6L9 | 78129363 | 0  |
| CEU | chr15 | GOLGA6L9 | 78179363 | 0  |
| CEU | chr15 | GOLGA6L9 | 78229363 | 0  |
| CEU | chr15 | GOLGA6L9 | 78279363 | 0  |
| CEU | chr15 | GOLGA6L9 | 78329363 | 0  |
| CEU | chr15 | GOLGA6L9 | 78379363 | 0  |
| CEU | chr15 | GOLGA6L9 | 78429363 | 0  |
| CEU | chr15 | GOLGA6L9 | 78479363 | 0  |
| CEU | chr15 | GOLGA6L9 | 78529363 | 0  |
| CEU | chr15 | GOLGA6L9 | 78579363 | 2  |
| CEU | chr15 | GOLGA6L9 | 78629363 | 22 |
| CEU | chr15 | GOLGA6L9 | 78679363 | 39 |
| CEU | chr15 | GOLGA6L9 | 78729363 | 19 |
| CEU | chr15 | GOLGA6L9 | 78779363 | 0  |
| CEU | chr15 | GOLGA6L9 | 78829363 | 0  |
| CEU | chr15 | GOLGA6L9 | 78879363 | 0  |
| CEU | chr15 | GOLGA6L9 | 78929363 | 0  |
| CEU | chr15 | GOLGA6L9 | 78979363 | 0  |
| CEU | chr15 | GOLGA6L9 | 79029363 | 0  |
| CEU | chr15 | GOLGA6L9 | 79079363 | 0  |
| CEU | chr15 | GOLGA6L9 | 79129363 | 0  |
| CEU | chr15 | GOLGA6L9 | 79179363 | 0  |
| CEU | chr15 | GOLGA6L9 | 79229363 | 0  |
| CEU | chr15 | GOLGA6L9 | 79279363 | 0  |
| CEU | chr15 | GOLGA6L9 | 79329363 | 0  |
| CEU | chr15 | GOLGA6L9 | 79379363 | 0  |
| CEU | chr15 | GOLGA6L9 | 79429363 | 0  |
| CEU | chr15 | GOLGA6L9 | 79479363 | 0  |
| CEU | chr15 | GOLGA6L9 | 79529363 | 0  |
| CEU | chr15 | GOLGA6L9 | 79579363 | 0  |

### 3\_Introgression\_data

|     |       |          |          |    |
|-----|-------|----------|----------|----|
| CEU | chr15 | GOLGA6L9 | 79629363 | 0  |
| CEU | chr15 | GOLGA6L9 | 79679363 | 0  |
| CEU | chr15 | GOLGA6L9 | 79729363 | 0  |
| CEU | chr15 | GOLGA6L9 | 79779363 | 0  |
| CEU | chr15 | GOLGA6L9 | 79829363 | 0  |
| CEU | chr15 | GOLGA6L9 | 79879363 | 0  |
| CEU | chr15 | GOLGA6L9 | 79929363 | 0  |
| CEU | chr15 | GOLGA6L9 | 79979363 | 47 |
| CEU | chr15 | GOLGA6L9 | 80029363 | 61 |
| CEU | chr15 | GOLGA6L9 | 80079363 | 37 |
| CEU | chr15 | GOLGA6L9 | 80129363 | 41 |
| CEU | chr15 | GOLGA6L9 | 80179363 | 38 |
| CEU | chr15 | GOLGA6L9 | 80229363 | 23 |
| CEU | chr15 | GOLGA6L9 | 80279363 | 3  |
| CEU | chr15 | GOLGA6L9 | 80329363 | 0  |
| CEU | chr15 | GOLGA6L9 | 80379363 | 0  |
| CEU | chr15 | GOLGA6L9 | 80429363 | 0  |
| CEU | chr15 | GOLGA6L9 | 80479363 | 0  |
| CEU | chr15 | GOLGA6L9 | 80529363 | 0  |
| CEU | chr15 | GOLGA6L9 | 80579363 | 0  |
| CEU | chr15 | GOLGA6L9 | 80629363 | 0  |
| CEU | chr15 | GOLGA6L9 | 80679363 | 0  |
| CEU | chr15 | GOLGA6L9 | 80729363 | 0  |
| CEU | chr15 | GOLGA6L9 | 80779363 | 0  |
| CEU | chr15 | GOLGA6L9 | 80829363 | 0  |
| CEU | chr15 | GOLGA6L9 | 80879363 | 0  |
| CEU | chr15 | GOLGA6L9 | 80929363 | 0  |
| CEU | chr15 | GOLGA6L9 | 80979363 | 0  |
| CEU | chr15 | GOLGA6L9 | 81029363 | 0  |
| CEU | chr15 | GOLGA6L9 | 81079363 | 0  |
| CEU | chr15 | GOLGA6L9 | 81129363 | 0  |
| CEU | chr15 | GOLGA6L9 | 81179363 | 0  |
| CEU | chr15 | GOLGA6L9 | 81229363 | 0  |
| CEU | chr15 | GOLGA6L9 | 81279363 | 0  |
| CEU | chr15 | GOLGA6L9 | 81329363 | 0  |
| CEU | chr15 | GOLGA6L9 | 81379363 | 0  |
| CEU | chr15 | GOLGA6L9 | 81429363 | 0  |
| CEU | chr15 | GOLGA6L9 | 81479363 | 0  |
| CEU | chr15 | GOLGA6L9 | 81529363 | 0  |
| CEU | chr15 | GOLGA6L9 | 81579363 | 0  |
| CEU | chr15 | GOLGA6L9 | 81629363 | 0  |
| CEU | chr15 | GOLGA6L9 | 81679363 | 0  |
| CEU | chr15 | GOLGA6L9 | 81729363 | 0  |
| CEU | chr15 | GOLGA6L9 | 81779363 | 0  |
| CEU | chr15 | GOLGA6L9 | 81829363 | 0  |
| CEU | chr15 | GOLGA6L9 | 81879363 | 0  |
| CEU | chr15 | GOLGA6L9 | 81929363 | 0  |
| CEU | chr15 | GOLGA6L9 | 81979363 | 0  |
| CEU | chr15 | GOLGA6L9 | 82029363 | 0  |

## 3\_Introgression\_data

|     |       |          |          |    |
|-----|-------|----------|----------|----|
| CEU | chr15 | GOLGA6L9 | 82079363 | 0  |
| CEU | chr15 | GOLGA6L9 | 82129363 | 0  |
| CEU | chr15 | GOLGA6L9 | 82179363 | 0  |
| CEU | chr15 | GOLGA6L9 | 82229363 | 0  |
| CEU | chr15 | GOLGA6L9 | 82279363 | 0  |
| CEU | chr15 | GOLGA6L9 | 82329363 | 0  |
| CEU | chr15 | GOLGA6L9 | 82379363 | 0  |
| CEU | chr15 | GOLGA6L9 | 82429363 | 0  |
| CEU | chr15 | GOLGA6L9 | 82479363 | 0  |
| CEU | chr15 | GOLGA6L9 | 82529363 | 0  |
| CEU | chr15 | GOLGA6L9 | 82579363 | 0  |
| CEU | chr15 | GOLGA6L9 | 82629363 | 0  |
| CEU | chr15 | GOLGA6L9 | 82679363 | 0  |
| CEU | chr15 | GOLGA6L9 | 82729363 | 0  |
| CEU | chr15 | GOLGA6L9 | 82779363 | 0  |
| CEU | chr15 | GOLGA6L9 | 82829363 | 0  |
| CEU | chr15 | GOLGA6L9 | 82879363 | 0  |
| CEU | chr15 | GOLGA6L9 | 82929363 | 0  |
| CEU | chr15 | GOLGA6L9 | 82979363 | 0  |
| CEU | chr15 | GOLGA6L9 | 83029363 | 0  |
| CEU | chr15 | GOLGA6L9 | 83079363 | 0  |
| CEU | chr15 | GOLGA6L9 | 83129363 | 0  |
| CEU | chr15 | GOLGA6L9 | 83179363 | 8  |
| CEU | chr15 | GOLGA6L9 | 83229363 | 29 |
| CEU | chr15 | GOLGA6L9 | 83279363 | 49 |
| CEU | chr15 | GOLGA6L9 | 83329363 | 48 |
| CEU | chr15 | GOLGA6L9 | 83379363 | 35 |
| CEU | chr15 | GOLGA6L9 | 83429363 | 36 |
| CEU | chr15 | GOLGA6L9 | 83479363 | 39 |
| CEU | chr15 | GOLGA6L9 | 83529363 | 31 |
| CEU | chr15 | GOLGA6L9 | 83579363 | 39 |
| CEU | chr15 | GOLGA6L9 | 83629363 | 43 |
| CEU | chr15 | GOLGA6L9 | 83679363 | 17 |
| CEU | chr15 | GOLGA6L9 | 83729363 | 0  |
| CEU | chr15 | GOLGA6L9 | 83779363 | 0  |
| CEU | chr15 | GOLGA6L9 | 83829363 | 0  |
| CEU | chr15 | GOLGA6L9 | 83879363 | 0  |
| CEU | chr15 | GOLGA6L9 | 83929363 | 0  |
| CEU | chr15 | GOLGA6L9 | 83979363 | 0  |
| CEU | chr15 | GOLGA6L9 | 84029363 | 0  |
| CEU | chr15 | GOLGA6L9 | 84079363 | 0  |
| CEU | chr15 | GOLGA6L9 | 84129363 | 0  |
| CEU | chr15 | GOLGA6L9 | 84179363 | 0  |
| CEU | chr15 | GOLGA6L9 | 84229363 | 7  |
| CEU | chr15 | GOLGA6L9 | 84279363 | 21 |
| CEU | chr15 | GOLGA6L9 | 84329363 | 28 |
| CEU | chr15 | GOLGA6L9 | 84379363 | 33 |
| CEU | chr15 | GOLGA6L9 | 84429363 | 32 |
| CEU | chr15 | GOLGA6L9 | 84479363 | 29 |



## 3\_Introgression\_data

|     |       |          |          |    |
|-----|-------|----------|----------|----|
| CEU | chr15 | GOLGA6L9 | 84529363 | 38 |
| CEU | chr15 | GOLGA6L9 | 84579363 | 44 |
| CEU | chr15 | GOLGA6L9 | 84629363 | 34 |
| CEU | chr15 | GOLGA6L9 | 84679363 | 26 |
| CEU | chr15 | GOLGA6L9 | 84729363 | 31 |
| CEU | chr15 | GOLGA6L9 | 84779363 | 34 |
| CEU | chr15 | GOLGA6L9 | 84829363 | 25 |
| CEU | chr15 | GOLGA6L9 | 84879363 | 8  |
| CEU | chr15 | GOLGA6L9 | 84929363 | 0  |
| CEU | chr15 | GOLGA6L9 | 84979363 | 0  |
| CEU | chr15 | GOLGA6L9 | 85029363 | 3  |
| CEU | chr15 | GOLGA6L9 | 85079363 | 25 |
| CEU | chr15 | GOLGA6L9 | 85129363 | 39 |
| CEU | chr15 | GOLGA6L9 | 85179363 | 38 |
| CEU | chr15 | GOLGA6L9 | 85229363 | 35 |
| CEU | chr15 | GOLGA6L9 | 85279363 | 34 |
| CEU | chr15 | GOLGA6L9 | 85329363 | 27 |
| CEU | chr15 | GOLGA6L9 | 85379363 | 20 |
| CEU | chr15 | GOLGA6L9 | 85429363 | 43 |
| CEU | chr15 | GOLGA6L9 | 85479363 | 55 |
| CEU | chr15 | GOLGA6L9 | 85529363 | 41 |
| CEU | chr15 | GOLGA6L9 | 85579363 | 28 |
| CEU | chr15 | GOLGA6L9 | 85629363 | 23 |
| CEU | chr15 | GOLGA6L9 | 85679363 | 24 |
| CEU | chr15 | GOLGA6L9 | 85729363 | 13 |
| CEU | chr15 | GOLGA6L9 | 85779363 | 0  |
| CEU | chr15 | GOLGA6L9 | 85829363 | 0  |
| CEU | chr15 | GOLGA6L9 | 85879363 | 0  |
| CEU | chr15 | GOLGA6L9 | 85929363 | 0  |
| CEU | chr15 | GOLGA6L9 | 85979363 | 0  |
| CEU | chr15 | GOLGA6L9 | 86029363 | 0  |
| CEU | chr15 | GOLGA6L9 | 86079363 | 0  |
| CEU | chr15 | GOLGA6L9 | 86129363 | 0  |
| CEU | chr15 | GOLGA6L9 | 86179363 | 0  |
| CEU | chr15 | GOLGA6L9 | 86229363 | 0  |
| CEU | chr15 | GOLGA6L9 | 86279363 | 0  |
| CEU | chr15 | GOLGA6L9 | 86329363 | 0  |
| CEU | chr15 | GOLGA6L9 | 86379363 | 6  |
| CEU | chr15 | GOLGA6L9 | 86429363 | 26 |
| CEU | chr15 | GOLGA6L9 | 86479363 | 32 |
| CEU | chr15 | GOLGA6L9 | 86529363 | 48 |
| CEU | chr15 | GOLGA6L9 | 86579363 | 77 |
| CEU | chr15 | GOLGA6L9 | 86629363 | 88 |
| CEU | chr15 | GOLGA6L9 | 86679363 | 74 |
| CEU | chr15 | GOLGA6L9 | 86729363 | 60 |
| CEU | chr15 | GOLGA6L9 | 86779363 | 50 |
| CEU | chr15 | GOLGA6L9 | 86829363 | 31 |
| CEU | chr15 | GOLGA6L9 | 86879363 | 35 |
| CEU | chr15 | GOLGA6L9 | 86929363 | 35 |

### 3\_Introgression\_data

|     |       |          |          |     |
|-----|-------|----------|----------|-----|
| CEU | chr15 | GOLGA6L9 | 86979363 | 53  |
| CEU | chr15 | GOLGA6L9 | 87029363 | 52  |
| CEU | chr15 | GOLGA6L9 | 87079363 | 32  |
| CEU | chr15 | GOLGA6L9 | 87129363 | 43  |
| CEU | chr15 | GOLGA6L9 | 87179363 | 43  |
| CEU | chr15 | GOLGA6L9 | 87229363 | 53  |
| CEU | chr15 | GOLGA6L9 | 87279363 | 39  |
| CEU | chr15 | GOLGA6L9 | 87329363 | 5   |
| CEU | chr15 | GOLGA6L9 | 87379363 | 0   |
| CEU | chr15 | GOLGA8G  | 23569611 | 0   |
| CEU | chr15 | GOLGA8G  | 23619611 | 0   |
| CEU | chr15 | GOLGA8G  | 23669611 | 32  |
| CEU | chr15 | GOLGA8G  | 23719611 | 46  |
| CEU | chr15 | GOLGA8G  | 23769611 | 16  |
| CEU | chr15 | GOLGA8G  | 23819611 | 2   |
| CEU | chr15 | GOLGA8G  | 23869611 | 0   |
| CEU | chr15 | GOLGA8G  | 23919611 | 0   |
| CEU | chr15 | GOLGA8G  | 23969611 | 0   |
| CEU | chr15 | GOLGA8G  | 24019611 | 22  |
| CEU | chr15 | GOLGA8G  | 24069611 | 31  |
| CEU | chr15 | GOLGA8G  | 24119611 | 9   |
| CEU | chr15 | GOLGA8G  | 24169611 | 12  |
| CEU | chr15 | GOLGA8G  | 24219611 | 29  |
| CEU | chr15 | GOLGA8G  | 24269611 | 56  |
| CEU | chr15 | GOLGA8G  | 24319611 | 55  |
| CEU | chr15 | GOLGA8G  | 24369611 | 32  |
| CEU | chr15 | GOLGA8G  | 24419611 | 62  |
| CEU | chr15 | GOLGA8G  | 24469611 | 72  |
| CEU | chr15 | GOLGA8G  | 24519611 | 59  |
| CEU | chr15 | GOLGA8G  | 24569611 | 66  |
| CEU | chr15 | GOLGA8G  | 24619611 | 54  |
| CEU | chr15 | GOLGA8G  | 24669611 | 87  |
| CEU | chr15 | GOLGA8G  | 24719611 | 145 |
| CEU | chr15 | GOLGA8G  | 24769611 | 107 |
| CEU | chr15 | GOLGA8G  | 24819611 | 141 |
| CEU | chr15 | GOLGA8G  | 24869611 | 161 |
| CEU | chr15 | GOLGA8G  | 24919611 | 92  |
| CEU | chr15 | GOLGA8G  | 24969611 | 63  |
| CEU | chr15 | GOLGA8G  | 25019611 | 33  |
| CEU | chr15 | GOLGA8G  | 25069611 | 14  |
| CEU | chr15 | GOLGA8G  | 25119611 | 0   |
| CEU | chr15 | GOLGA8G  | 25169611 | 0   |
| CEU | chr15 | GOLGA8G  | 25219611 | 0   |
| CEU | chr15 | GOLGA8G  | 25269611 | 0   |
| CEU | chr15 | GOLGA8G  | 25319611 | 0   |
| CEU | chr15 | GOLGA8G  | 25369611 | 0   |
| CEU | chr15 | GOLGA8G  | 25419611 | 0   |
| CEU | chr15 | GOLGA8G  | 25469611 | 0   |
| CEU | chr15 | GOLGA8G  | 25519611 | 0   |

### 3\_Introgression\_data

|     |       |         |          |    |
|-----|-------|---------|----------|----|
| CEU | chr15 | GOLGA8G | 25569611 | 0  |
| CEU | chr15 | GOLGA8G | 25619611 | 0  |
| CEU | chr15 | GOLGA8G | 25669611 | 0  |
| CEU | chr15 | GOLGA8G | 25719611 | 0  |
| CEU | chr15 | GOLGA8G | 25769611 | 0  |
| CEU | chr15 | GOLGA8G | 25819611 | 0  |
| CEU | chr15 | GOLGA8G | 25869611 | 0  |
| CEU | chr15 | GOLGA8G | 25919611 | 0  |
| CEU | chr15 | GOLGA8G | 25969611 | 0  |
| CEU | chr15 | GOLGA8G | 26019611 | 0  |
| CEU | chr15 | GOLGA8G | 26069611 | 0  |
| CEU | chr15 | GOLGA8G | 26119611 | 0  |
| CEU | chr15 | GOLGA8G | 26169611 | 0  |
| CEU | chr15 | GOLGA8G | 26219611 | 0  |
| CEU | chr15 | GOLGA8G | 26269611 | 0  |
| CEU | chr15 | GOLGA8G | 26319611 | 0  |
| CEU | chr15 | GOLGA8G | 26369611 | 0  |
| CEU | chr15 | GOLGA8G | 26419611 | 0  |
| CEU | chr15 | GOLGA8G | 26469611 | 0  |
| CEU | chr15 | GOLGA8G | 26519611 | 0  |
| CEU | chr15 | GOLGA8G | 26569611 | 0  |
| CEU | chr15 | GOLGA8G | 26619611 | 0  |
| CEU | chr15 | GOLGA8G | 26669611 | 0  |
| CEU | chr15 | GOLGA8G | 26719611 | 0  |
| CEU | chr15 | GOLGA8G | 26769611 | 0  |
| CEU | chr15 | GOLGA8G | 26819611 | 0  |
| CEU | chr15 | GOLGA8G | 26869611 | 0  |
| CEU | chr15 | GOLGA8G | 26919611 | 0  |
| CEU | chr15 | GOLGA8G | 26969611 | 0  |
| CEU | chr15 | GOLGA8G | 27019611 | 0  |
| CEU | chr15 | GOLGA8G | 27069611 | 0  |
| CEU | chr15 | GOLGA8G | 27119611 | 6  |
| CEU | chr15 | GOLGA8G | 27169611 | 26 |
| CEU | chr15 | GOLGA8G | 27219611 | 20 |
| CEU | chr15 | GOLGA8G | 27269611 | 0  |
| CEU | chr15 | GOLGA8G | 27319611 | 0  |
| CEU | chr15 | GOLGA8G | 27369611 | 0  |
| CEU | chr15 | GOLGA8G | 27419611 | 0  |
| CEU | chr15 | GOLGA8G | 27469611 | 0  |
| CEU | chr15 | GOLGA8G | 27519611 | 0  |
| CEU | chr15 | GOLGA8G | 27569611 | 0  |
| CEU | chr15 | GOLGA8G | 27619611 | 0  |
| CEU | chr15 | GOLGA8G | 27669611 | 0  |
| CEU | chr15 | GOLGA8G | 27719611 | 0  |
| CEU | chr15 | GOLGA8G | 27769611 | 0  |
| CEU | chr15 | GOLGA8G | 27819611 | 0  |
| CEU | chr15 | GOLGA8G | 27869611 | 0  |
| CEU | chr15 | GOLGA8G | 27919611 | 0  |
| CEU | chr15 | GOLGA8G | 27969611 | 0  |

## 3\_Introgression\_data

|     |       |         |          |   |
|-----|-------|---------|----------|---|
| CEU | chr15 | GOLGA8G | 28019611 | 0 |
| CEU | chr15 | GOLGA8G | 28069611 | 0 |
| CEU | chr15 | GOLGA8G | 28119611 | 0 |
| CEU | chr15 | GOLGA8G | 28169611 | 0 |
| CEU | chr15 | GOLGA8G | 28219611 | 0 |
| CEU | chr15 | GOLGA8G | 28269611 | 0 |
| CEU | chr15 | GOLGA8G | 28319611 | 0 |
| CEU | chr15 | GOLGA8G | 28369611 | 0 |
| CEU | chr15 | GOLGA8G | 28419611 | 0 |
| CEU | chr15 | GOLGA8G | 28469611 | 0 |
| CEU | chr15 | GOLGA8G | 28519611 | 0 |
| CEU | chr15 | GOLGA8G | 28569611 | 0 |
| CEU | chr15 | GOLGA8G | 28619611 | 0 |
| CEU | chr15 | GOLGA8G | 28669611 | 0 |
| CEU | chr15 | GOLGA8G | 28719611 | 0 |
| CEU | chr15 | GOLGA8G | 28769611 | 0 |
| CEU | chr15 | GOLGA8G | 28819611 | 0 |
| CEU | chr15 | GOLGA8G | 28869611 | 0 |
| CEU | chr15 | GOLGA8G | 28919611 | 0 |
| CEU | chr15 | GOLGA8G | 28969611 | 0 |
| CEU | chr15 | GOLGA8G | 29019611 | 0 |
| CEU | chr15 | GOLGA8G | 29069611 | 0 |
| CEU | chr15 | GOLGA8G | 29119611 | 0 |
| CEU | chr15 | GOLGA8G | 29169611 | 0 |
| CEU | chr15 | GOLGA8G | 29219611 | 0 |
| CEU | chr15 | GOLGA8G | 29269611 | 0 |
| CEU | chr15 | GOLGA8G | 29319611 | 0 |
| CEU | chr15 | GOLGA8G | 29369611 | 0 |
| CEU | chr15 | GOLGA8G | 29419611 | 0 |
| CEU | chr15 | GOLGA8G | 29469611 | 0 |
| CEU | chr15 | GOLGA8G | 29519611 | 0 |
| CEU | chr15 | GOLGA8G | 29569611 | 0 |
| CEU | chr15 | GOLGA8G | 29619611 | 0 |
| CEU | chr15 | GOLGA8G | 29669611 | 0 |
| CEU | chr15 | GOLGA8G | 29719611 | 0 |
| CEU | chr15 | GOLGA8G | 29769611 | 0 |
| CEU | chr15 | GOLGA8G | 29819611 | 0 |
| CEU | chr15 | GOLGA8G | 29869611 | 0 |
| CEU | chr15 | GOLGA8G | 29919611 | 0 |
| CEU | chr15 | GOLGA8G | 29969611 | 0 |
| CEU | chr15 | GOLGA8G | 30019611 | 0 |
| CEU | chr15 | GOLGA8G | 30069611 | 0 |
| CEU | chr15 | GOLGA8G | 30119611 | 0 |
| CEU | chr15 | GOLGA8G | 30169611 | 0 |
| CEU | chr15 | GOLGA8G | 30219611 | 0 |
| CEU | chr15 | GOLGA8G | 30269611 | 0 |
| CEU | chr15 | GOLGA8G | 30319611 | 0 |
| CEU | chr15 | GOLGA8G | 30369611 | 0 |
| CEU | chr15 | GOLGA8G | 30419611 | 0 |

### 3\_Introgression\_data

|     |       |         |          |   |
|-----|-------|---------|----------|---|
| CEU | chr15 | GOLGA8G | 30469611 | 0 |
| CEU | chr15 | GOLGA8G | 30519611 | 0 |
| CEU | chr15 | GOLGA8G | 30569611 | 0 |
| CEU | chr15 | GOLGA8G | 30619611 | 0 |
| CEU | chr15 | GOLGA8G | 30669611 | 0 |
| CEU | chr15 | GOLGA8G | 30719611 | 0 |
| CEU | chr15 | GOLGA8G | 30769611 | 0 |
| CEU | chr15 | GOLGA8G | 30819611 | 0 |
| CEU | chr15 | GOLGA8G | 30869611 | 0 |
| CEU | chr15 | GOLGA8G | 30919611 | 0 |
| CEU | chr15 | GOLGA8G | 30969611 | 0 |
| CEU | chr15 | GOLGA8G | 31019611 | 0 |
| CEU | chr15 | GOLGA8G | 31069611 | 0 |
| CEU | chr15 | GOLGA8G | 31119611 | 0 |
| CEU | chr15 | GOLGA8G | 31169611 | 0 |
| CEU | chr15 | GOLGA8G | 31219611 | 0 |
| CEU | chr15 | GOLGA8G | 31269611 | 0 |
| CEU | chr15 | GOLGA8G | 31319611 | 0 |
| CEU | chr15 | GOLGA8G | 31369611 | 0 |
| CEU | chr15 | GOLGA8G | 31419611 | 0 |
| CEU | chr15 | GOLGA8G | 31469611 | 0 |
| CEU | chr15 | GOLGA8G | 31519611 | 0 |
| CEU | chr15 | GOLGA8G | 31569611 | 0 |
| CEU | chr15 | GOLGA8G | 31619611 | 0 |
| CEU | chr15 | GOLGA8G | 31669611 | 0 |
| CEU | chr15 | GOLGA8G | 31719611 | 0 |
| CEU | chr15 | GOLGA8G | 31769611 | 0 |
| CEU | chr15 | GOLGA8G | 31819611 | 0 |
| CEU | chr15 | GOLGA8G | 31869611 | 0 |
| CEU | chr15 | GOLGA8G | 31919611 | 0 |
| CEU | chr15 | GOLGA8G | 31969611 | 0 |
| CEU | chr15 | GOLGA8G | 32019611 | 0 |
| CEU | chr15 | GOLGA8G | 32069611 | 0 |
| CEU | chr15 | GOLGA8G | 32119611 | 0 |
| CEU | chr15 | GOLGA8G | 32169611 | 0 |
| CEU | chr15 | GOLGA8G | 32219611 | 0 |
| CEU | chr15 | GOLGA8G | 32269611 | 0 |
| CEU | chr15 | GOLGA8G | 32319611 | 0 |
| CEU | chr15 | GOLGA8G | 32369611 | 0 |
| CEU | chr15 | GOLGA8G | 32419611 | 0 |
| CEU | chr15 | GOLGA8G | 32469611 | 0 |
| CEU | chr15 | GOLGA8G | 32519611 | 0 |
| CEU | chr15 | GOLGA8G | 32569611 | 0 |
| CEU | chr15 | GOLGA8G | 32619611 | 0 |
| CEU | chr15 | GOLGA8G | 32669611 | 0 |
| CEU | chr15 | GOLGA8G | 32719611 | 0 |
| CEU | chr15 | GOLGA8G | 32769611 | 0 |
| CEU | chr15 | GOLGA8G | 32819611 | 0 |
| CEU | chr15 | GOLGA8G | 32869611 | 0 |

### 3\_Introgression\_data

|     |       |         |           |    |
|-----|-------|---------|-----------|----|
| CEU | chr15 | GOLGA8G | 32919611  | 0  |
| CEU | chr15 | GOLGA8G | 32969611  | 0  |
| CEU | chr15 | GOLGA8G | 33019611  | 0  |
| CEU | chr15 | GOLGA8G | 33069611  | 0  |
| CEU | chr15 | GOLGA8G | 33119611  | 0  |
| CEU | chr15 | GOLGA8G | 33169611  | 0  |
| CEU | chr15 | GOLGA8G | 33219611  | 0  |
| CEU | chr15 | GOLGA8G | 33269611  | 0  |
| CEU | chr15 | GOLGA8G | 33319611  | 18 |
| CEU | chr15 | GOLGA8G | 33369611  | 58 |
| CEU | chr15 | GOLGA8G | 33419611  | 55 |
| CEU | chr15 | GOLGA8G | 33469611  | 38 |
| CEU | chr1  | HIST2   | 138952386 | 0  |
| CEU | chr1  | HIST2   | 139002386 | 0  |
| CEU | chr1  | HIST2   | 139052386 | 0  |
| CEU | chr1  | HIST2   | 139102386 | 0  |
| CEU | chr1  | HIST2   | 139152386 | 0  |
| CEU | chr1  | HIST2   | 139202386 | 0  |
| CEU | chr1  | HIST2   | 139252386 | 0  |
| CEU | chr1  | HIST2   | 139302386 | 0  |
| CEU | chr1  | HIST2   | 139352386 | 0  |
| CEU | chr1  | HIST2   | 139402386 | 0  |
| CEU | chr1  | HIST2   | 139452386 | 0  |
| CEU | chr1  | HIST2   | 139502386 | 0  |
| CEU | chr1  | HIST2   | 139552386 | 0  |
| CEU | chr1  | HIST2   | 139602386 | 0  |
| CEU | chr1  | HIST2   | 139652386 | 0  |
| CEU | chr1  | HIST2   | 139702386 | 0  |
| CEU | chr1  | HIST2   | 139752386 | 0  |
| CEU | chr1  | HIST2   | 139802386 | 0  |
| CEU | chr1  | HIST2   | 139852386 | 0  |
| CEU | chr1  | HIST2   | 139902386 | 0  |
| CEU | chr1  | HIST2   | 139952386 | 0  |
| CEU | chr1  | HIST2   | 140002386 | 0  |
| CEU | chr1  | HIST2   | 140052386 | 0  |
| CEU | chr1  | HIST2   | 140102386 | 0  |
| CEU | chr1  | HIST2   | 140152386 | 0  |
| CEU | chr1  | HIST2   | 140202386 | 0  |
| CEU | chr1  | HIST2   | 140252386 | 0  |
| CEU | chr1  | HIST2   | 140302386 | 0  |
| CEU | chr1  | HIST2   | 140352386 | 0  |
| CEU | chr1  | HIST2   | 140402386 | 0  |
| CEU | chr1  | HIST2   | 140452386 | 0  |
| CEU | chr1  | HIST2   | 140502386 | 0  |
| CEU | chr1  | HIST2   | 140552386 | 0  |
| CEU | chr1  | HIST2   | 140602386 | 0  |
| CEU | chr1  | HIST2   | 140652386 | 0  |
| CEU | chr1  | HIST2   | 140702386 | 0  |
| CEU | chr1  | HIST2   | 140752386 | 0  |

3\_Introgression\_data

|     |      |       |           |    |
|-----|------|-------|-----------|----|
| CEU | chr1 | HIST2 | 140802386 | 0  |
| CEU | chr1 | HIST2 | 140852386 | 0  |
| CEU | chr1 | HIST2 | 140902386 | 0  |
| CEU | chr1 | HIST2 | 140952386 | 0  |
| CEU | chr1 | HIST2 | 141002386 | 0  |
| CEU | chr1 | HIST2 | 141052386 | 0  |
| CEU | chr1 | HIST2 | 141102386 | 0  |
| CEU | chr1 | HIST2 | 141152386 | 0  |
| CEU | chr1 | HIST2 | 141202386 | 0  |
| CEU | chr1 | HIST2 | 141252386 | 0  |
| CEU | chr1 | HIST2 | 141302386 | 0  |
| CEU | chr1 | HIST2 | 141352386 | 0  |
| CEU | chr1 | HIST2 | 141402386 | 0  |
| CEU | chr1 | HIST2 | 141452386 | 0  |
| CEU | chr1 | HIST2 | 141502386 | 0  |
| CEU | chr1 | HIST2 | 141552386 | 0  |
| CEU | chr1 | HIST2 | 141602386 | 0  |
| CEU | chr1 | HIST2 | 141652386 | 0  |
| CEU | chr1 | HIST2 | 141702386 | 0  |
| CEU | chr1 | HIST2 | 141752386 | 0  |
| CEU | chr1 | HIST2 | 141802386 | 0  |
| CEU | chr1 | HIST2 | 141852386 | 0  |
| CEU | chr1 | HIST2 | 141902386 | 0  |
| CEU | chr1 | HIST2 | 141952386 | 0  |
| CEU | chr1 | HIST2 | 142002386 | 0  |
| CEU | chr1 | HIST2 | 142052386 | 0  |
| CEU | chr1 | HIST2 | 142102386 | 0  |
| CEU | chr1 | HIST2 | 142152386 | 0  |
| CEU | chr1 | HIST2 | 142202386 | 0  |
| CEU | chr1 | HIST2 | 142252386 | 0  |
| CEU | chr1 | HIST2 | 142302386 | 0  |
| CEU | chr1 | HIST2 | 142352386 | 0  |
| CEU | chr1 | HIST2 | 142402386 | 0  |
| CEU | chr1 | HIST2 | 142452386 | 0  |
| CEU | chr1 | HIST2 | 142502386 | 0  |
| CEU | chr1 | HIST2 | 142552386 | 0  |
| CEU | chr1 | HIST2 | 142602386 | 0  |
| CEU | chr1 | HIST2 | 142652386 | 0  |
| CEU | chr1 | HIST2 | 142702386 | 0  |
| CEU | chr1 | HIST2 | 142752386 | 0  |
| CEU | chr1 | HIST2 | 142802386 | 0  |
| CEU | chr1 | HIST2 | 142852386 | 0  |
| CEU | chr1 | HIST2 | 142902386 | 0  |
| CEU | chr1 | HIST2 | 142952386 | 0  |
| CEU | chr1 | HIST2 | 143002386 | 0  |
| CEU | chr1 | HIST2 | 143052386 | 0  |
| CEU | chr1 | HIST2 | 143102386 | 27 |
| CEU | chr1 | HIST2 | 143152386 | 50 |
| CEU | chr1 | HIST2 | 143202386 | 56 |

3\_Introgression\_data

|     |      |       |           |    |
|-----|------|-------|-----------|----|
| CEU | chr1 | HIST2 | 143252386 | 59 |
| CEU | chr1 | HIST2 | 143302386 | 26 |
| CEU | chr1 | HIST2 | 143352386 | 0  |
| CEU | chr1 | HIST2 | 143402386 | 0  |
| CEU | chr1 | HIST2 | 143452386 | 0  |
| CEU | chr1 | HIST2 | 143502386 | 0  |
| CEU | chr1 | HIST2 | 143552386 | 0  |
| CEU | chr1 | HIST2 | 143602386 | 0  |
| CEU | chr1 | HIST2 | 143652386 | 0  |
| CEU | chr1 | HIST2 | 143702386 | 0  |
| CEU | chr1 | HIST2 | 143752386 | 0  |
| CEU | chr1 | HIST2 | 143802386 | 0  |
| CEU | chr1 | HIST2 | 143852386 | 0  |
| CEU | chr1 | HIST2 | 143902386 | 0  |
| CEU | chr1 | HIST2 | 143952386 | 0  |
| CEU | chr1 | HIST2 | 144002386 | 0  |
| CEU | chr1 | HIST2 | 144052386 | 0  |
| CEU | chr1 | HIST2 | 144102386 | 0  |
| CEU | chr1 | HIST2 | 144152386 | 0  |
| CEU | chr1 | HIST2 | 144202386 | 0  |
| CEU | chr1 | HIST2 | 144252386 | 0  |
| CEU | chr1 | HIST2 | 144302386 | 0  |
| CEU | chr1 | HIST2 | 144352386 | 0  |
| CEU | chr1 | HIST2 | 144402386 | 0  |
| CEU | chr1 | HIST2 | 144452386 | 0  |
| CEU | chr1 | HIST2 | 144502386 | 0  |
| CEU | chr1 | HIST2 | 144552386 | 0  |
| CEU | chr1 | HIST2 | 144602386 | 0  |
| CEU | chr1 | HIST2 | 144652386 | 0  |
| CEU | chr1 | HIST2 | 144702386 | 0  |
| CEU | chr1 | HIST2 | 144752386 | 0  |
| CEU | chr1 | HIST2 | 144802386 | 0  |
| CEU | chr1 | HIST2 | 144852386 | 0  |
| CEU | chr1 | HIST2 | 144902386 | 0  |
| CEU | chr1 | HIST2 | 144952386 | 0  |
| CEU | chr1 | HIST2 | 145002386 | 0  |
| CEU | chr1 | HIST2 | 145052386 | 0  |
| CEU | chr1 | HIST2 | 145102386 | 0  |
| CEU | chr1 | HIST2 | 145152386 | 0  |
| CEU | chr1 | HIST2 | 145202386 | 0  |
| CEU | chr1 | HIST2 | 145252386 | 0  |
| CEU | chr1 | HIST2 | 145302386 | 0  |
| CEU | chr1 | HIST2 | 145352386 | 0  |
| CEU | chr1 | HIST2 | 145402386 | 0  |
| CEU | chr1 | HIST2 | 145452386 | 0  |
| CEU | chr1 | HIST2 | 145502386 | 0  |
| CEU | chr1 | HIST2 | 145552386 | 0  |
| CEU | chr1 | HIST2 | 145602386 | 0  |
| CEU | chr1 | HIST2 | 145652386 | 0  |



3\_Introgression\_data

|     |      |       |           |     |
|-----|------|-------|-----------|-----|
| CEU | chr1 | HIST2 | 145702386 | 0   |
| CEU | chr1 | HIST2 | 145752386 | 0   |
| CEU | chr1 | HIST2 | 145802386 | 0   |
| CEU | chr1 | HIST2 | 145852386 | 0   |
| CEU | chr1 | HIST2 | 145902386 | 0   |
| CEU | chr1 | HIST2 | 145952386 | 0   |
| CEU | chr1 | HIST2 | 146002386 | 0   |
| CEU | chr1 | HIST2 | 146052386 | 0   |
| CEU | chr1 | HIST2 | 146102386 | 0   |
| CEU | chr1 | HIST2 | 146152386 | 0   |
| CEU | chr1 | HIST2 | 146202386 | 0   |
| CEU | chr1 | HIST2 | 146252386 | 0   |
| CEU | chr1 | HIST2 | 146302386 | 0   |
| CEU | chr1 | HIST2 | 146352386 | 0   |
| CEU | chr1 | HIST2 | 146402386 | 0   |
| CEU | chr1 | HIST2 | 146452386 | 8   |
| CEU | chr1 | HIST2 | 146502386 | 34  |
| CEU | chr1 | HIST2 | 146552386 | 55  |
| CEU | chr1 | HIST2 | 146602386 | 40  |
| CEU | chr1 | HIST2 | 146652386 | 37  |
| CEU | chr1 | HIST2 | 146702386 | 43  |
| CEU | chr1 | HIST2 | 146752386 | 36  |
| CEU | chr1 | HIST2 | 146802386 | 38  |
| CEU | chr1 | HIST2 | 146852386 | 44  |
| CEU | chr1 | HIST2 | 146902386 | 47  |
| CEU | chr1 | HIST2 | 146952386 | 33  |
| CEU | chr1 | HIST2 | 147002386 | 24  |
| CEU | chr1 | HIST2 | 147052386 | 31  |
| CEU | chr1 | HIST2 | 147102386 | 33  |
| CEU | chr1 | HIST2 | 147152386 | 34  |
| CEU | chr1 | HIST2 | 147202386 | 63  |
| CEU | chr1 | HIST2 | 147252386 | 115 |
| CEU | chr1 | HIST2 | 147302386 | 110 |
| CEU | chr1 | HIST2 | 147352386 | 59  |
| CEU | chr1 | HIST2 | 147402386 | 24  |
| CEU | chr1 | HIST2 | 147452386 | 4   |
| CEU | chr1 | HIST2 | 147502386 | 0   |
| CEU | chr1 | HIST2 | 147552386 | 0   |
| CEU | chr1 | HIST2 | 147602386 | 0   |
| CEU | chr1 | HIST2 | 147652386 | 0   |
| CEU | chr1 | HIST2 | 147702386 | 0   |
| CEU | chr1 | HIST2 | 147752386 | 0   |
| CEU | chr1 | HIST2 | 147802386 | 0   |
| CEU | chr1 | HIST2 | 147852386 | 0   |
| CEU | chr1 | HIST2 | 147902386 | 0   |
| CEU | chr1 | HIST2 | 147952386 | 0   |
| CEU | chr1 | HIST2 | 148002386 | 0   |
| CEU | chr1 | HIST2 | 148052386 | 0   |
| CEU | chr1 | HIST2 | 148102386 | 0   |

### 3\_Introgression\_data

|     |      |       |           |    |
|-----|------|-------|-----------|----|
| CEU | chr1 | HIST2 | 148152386 | 0  |
| CEU | chr1 | HIST2 | 148202386 | 0  |
| CEU | chr1 | HIST2 | 148252386 | 0  |
| CEU | chr1 | HIST2 | 148302386 | 0  |
| CEU | chr1 | HIST2 | 148352386 | 0  |
| CEU | chr1 | HIST2 | 148402386 | 0  |
| CEU | chr1 | HIST2 | 148452386 | 0  |
| CEU | chr1 | HIST2 | 148502386 | 0  |
| CEU | chr1 | HIST2 | 148552386 | 0  |
| CEU | chr1 | HIST2 | 148602386 | 0  |
| CEU | chr1 | HIST2 | 148652386 | 0  |
| CEU | chr1 | HIST2 | 148702386 | 0  |
| CEU | chr1 | HIST2 | 148752386 | 0  |
| CEU | chr1 | HIST2 | 148802386 | 0  |
| CEU | chr1 | HIST2 | 148852386 | 0  |
| CEU | chr1 | HIST2 | 144832689 | 0  |
| CEU | chr1 | HIST2 | 144882689 | 0  |
| CEU | chr1 | HIST2 | 144932689 | 0  |
| CEU | chr1 | HIST2 | 144982689 | 0  |
| CEU | chr1 | HIST2 | 145032689 | 0  |
| CEU | chr1 | HIST2 | 145082689 | 0  |
| CEU | chr1 | HIST2 | 145132689 | 0  |
| CEU | chr1 | HIST2 | 145182689 | 0  |
| CEU | chr1 | HIST2 | 145232689 | 0  |
| CEU | chr1 | HIST2 | 145282689 | 0  |
| CEU | chr1 | HIST2 | 145332689 | 0  |
| CEU | chr1 | HIST2 | 145382689 | 0  |
| CEU | chr1 | HIST2 | 145432689 | 0  |
| CEU | chr1 | HIST2 | 145482689 | 0  |
| CEU | chr1 | HIST2 | 145532689 | 0  |
| CEU | chr1 | HIST2 | 145582689 | 0  |
| CEU | chr1 | HIST2 | 145632689 | 0  |
| CEU | chr1 | HIST2 | 145682689 | 0  |
| CEU | chr1 | HIST2 | 145732689 | 0  |
| CEU | chr1 | HIST2 | 145782689 | 0  |
| CEU | chr1 | HIST2 | 145832689 | 0  |
| CEU | chr1 | HIST2 | 145882689 | 0  |
| CEU | chr1 | HIST2 | 145932689 | 0  |
| CEU | chr1 | HIST2 | 145982689 | 0  |
| CEU | chr1 | HIST2 | 146032689 | 0  |
| CEU | chr1 | HIST2 | 146082689 | 0  |
| CEU | chr1 | HIST2 | 146132689 | 0  |
| CEU | chr1 | HIST2 | 146182689 | 0  |
| CEU | chr1 | HIST2 | 146232689 | 0  |
| CEU | chr1 | HIST2 | 146282689 | 0  |
| CEU | chr1 | HIST2 | 146332689 | 0  |
| CEU | chr1 | HIST2 | 146382689 | 0  |
| CEU | chr1 | HIST2 | 146432689 | 0  |
| CEU | chr1 | HIST2 | 146482689 | 24 |

3\_Introgression\_data

|     |      |       |           |     |
|-----|------|-------|-----------|-----|
| CEU | chr1 | HIST2 | 146532689 | 50  |
| CEU | chr1 | HIST2 | 146582689 | 46  |
| CEU | chr1 | HIST2 | 146632689 | 39  |
| CEU | chr1 | HIST2 | 146682689 | 41  |
| CEU | chr1 | HIST2 | 146732689 | 44  |
| CEU | chr1 | HIST2 | 146782689 | 33  |
| CEU | chr1 | HIST2 | 146832689 | 37  |
| CEU | chr1 | HIST2 | 146882689 | 46  |
| CEU | chr1 | HIST2 | 146932689 | 41  |
| CEU | chr1 | HIST2 | 146982689 | 33  |
| CEU | chr1 | HIST2 | 147032689 | 25  |
| CEU | chr1 | HIST2 | 147082689 | 32  |
| CEU | chr1 | HIST2 | 147132689 | 28  |
| CEU | chr1 | HIST2 | 147182689 | 41  |
| CEU | chr1 | HIST2 | 147232689 | 88  |
| CEU | chr1 | HIST2 | 147282689 | 130 |
| CEU | chr1 | HIST2 | 147332689 | 95  |
| CEU | chr1 | HIST2 | 147382689 | 30  |
| CEU | chr1 | HIST2 | 147432689 | 9   |
| CEU | chr1 | HIST2 | 147482689 | 0   |
| CEU | chr1 | HIST2 | 147532689 | 0   |
| CEU | chr1 | HIST2 | 147582689 | 0   |
| CEU | chr1 | HIST2 | 147632689 | 0   |
| CEU | chr1 | HIST2 | 147682689 | 0   |
| CEU | chr1 | HIST2 | 147732689 | 0   |
| CEU | chr1 | HIST2 | 147782689 | 0   |
| CEU | chr1 | HIST2 | 147832689 | 0   |
| CEU | chr1 | HIST2 | 147882689 | 0   |
| CEU | chr1 | HIST2 | 147932689 | 0   |
| CEU | chr1 | HIST2 | 147982689 | 0   |
| CEU | chr1 | HIST2 | 148032689 | 0   |
| CEU | chr1 | HIST2 | 148082689 | 0   |
| CEU | chr1 | HIST2 | 148132689 | 0   |
| CEU | chr1 | HIST2 | 148182689 | 0   |
| CEU | chr1 | HIST2 | 148232689 | 0   |
| CEU | chr1 | HIST2 | 148282689 | 0   |
| CEU | chr1 | HIST2 | 148332689 | 0   |
| CEU | chr1 | HIST2 | 148382689 | 0   |
| CEU | chr1 | HIST2 | 148432689 | 0   |
| CEU | chr1 | HIST2 | 148482689 | 0   |
| CEU | chr1 | HIST2 | 148532689 | 0   |
| CEU | chr1 | HIST2 | 148582689 | 0   |
| CEU | chr1 | HIST2 | 148632689 | 0   |
| CEU | chr1 | HIST2 | 148682689 | 0   |
| CEU | chr1 | HIST2 | 148732689 | 0   |
| CEU | chr1 | HIST2 | 148782689 | 0   |
| CEU | chr1 | HIST2 | 148832689 | 0   |
| CEU | chr1 | HIST2 | 148882689 | 0   |
| CEU | chr1 | HIST2 | 148932689 | 0   |

### 3\_Introgression\_data

|     |      |       |           |    |
|-----|------|-------|-----------|----|
| CEU | chr1 | HIST2 | 148982689 | 0  |
| CEU | chr1 | HIST2 | 149032689 | 0  |
| CEU | chr1 | HIST2 | 149082689 | 0  |
| CEU | chr1 | HIST2 | 149132689 | 0  |
| CEU | chr1 | HIST2 | 149182689 | 0  |
| CEU | chr1 | HIST2 | 149232689 | 0  |
| CEU | chr1 | HIST2 | 149282689 | 0  |
| CEU | chr1 | HIST2 | 149332689 | 0  |
| CEU | chr1 | HIST2 | 149382689 | 0  |
| CEU | chr1 | HIST2 | 149432689 | 0  |
| CEU | chr1 | HIST2 | 149482689 | 0  |
| CEU | chr1 | HIST2 | 149532689 | 0  |
| CEU | chr1 | HIST2 | 149582689 | 0  |
| CEU | chr1 | HIST2 | 149632689 | 0  |
| CEU | chr1 | HIST2 | 149682689 | 17 |
| CEU | chr1 | HIST2 | 149732689 | 34 |
| CEU | chr1 | HIST2 | 149782689 | 26 |
| CEU | chr1 | HIST2 | 149832689 | 9  |
| CEU | chr1 | HIST2 | 149882689 | 0  |
| CEU | chr1 | HIST2 | 149932689 | 0  |
| CEU | chr1 | HIST2 | 149982689 | 0  |
| CEU | chr1 | HIST2 | 150032689 | 0  |
| CEU | chr1 | HIST2 | 150082689 | 0  |
| CEU | chr1 | HIST2 | 150132689 | 0  |
| CEU | chr1 | HIST2 | 150182689 | 0  |
| CEU | chr1 | HIST2 | 150232689 | 0  |
| CEU | chr1 | HIST2 | 150282689 | 0  |
| CEU | chr1 | HIST2 | 150332689 | 0  |
| CEU | chr1 | HIST2 | 150382689 | 0  |
| CEU | chr1 | HIST2 | 150432689 | 0  |
| CEU | chr1 | HIST2 | 150482689 | 0  |
| CEU | chr1 | HIST2 | 150532689 | 17 |
| CEU | chr1 | HIST2 | 150582689 | 45 |
| CEU | chr1 | HIST2 | 150632689 | 47 |
| CEU | chr1 | HIST2 | 150682689 | 36 |
| CEU | chr1 | HIST2 | 150732689 | 40 |
| CEU | chr1 | HIST2 | 150782689 | 41 |
| CEU | chr1 | HIST2 | 150832689 | 41 |
| CEU | chr1 | HIST2 | 150882689 | 37 |
| CEU | chr1 | HIST2 | 150932689 | 37 |
| CEU | chr1 | HIST2 | 150982689 | 51 |
| CEU | chr1 | HIST2 | 151032689 | 50 |
| CEU | chr1 | HIST2 | 151082689 | 38 |
| CEU | chr1 | HIST2 | 151132689 | 37 |
| CEU | chr1 | HIST2 | 151182689 | 21 |
| CEU | chr1 | HIST2 | 151232689 | 0  |
| CEU | chr1 | HIST2 | 151282689 | 0  |
| CEU | chr1 | HIST2 | 151332689 | 0  |
| CEU | chr1 | HIST2 | 151382689 | 0  |

### 3\_Introgression\_data

|     |      |       |           |   |
|-----|------|-------|-----------|---|
| CEU | chr1 | HIST2 | 151432689 | 0 |
| CEU | chr1 | HIST2 | 151482689 | 0 |
| CEU | chr1 | HIST2 | 151532689 | 0 |
| CEU | chr1 | HIST2 | 151582689 | 0 |
| CEU | chr1 | HIST2 | 151632689 | 0 |
| CEU | chr1 | HIST2 | 151682689 | 0 |
| CEU | chr1 | HIST2 | 151732689 | 0 |
| CEU | chr1 | HIST2 | 151782689 | 0 |
| CEU | chr1 | HIST2 | 151832689 | 0 |
| CEU | chr1 | HIST2 | 151882689 | 0 |
| CEU | chr1 | HIST2 | 151932689 | 0 |
| CEU | chr1 | HIST2 | 151982689 | 0 |
| CEU | chr1 | HIST2 | 152032689 | 0 |
| CEU | chr1 | HIST2 | 152082689 | 0 |
| CEU | chr1 | HIST2 | 152132689 | 0 |
| CEU | chr1 | HIST2 | 152182689 | 0 |
| CEU | chr1 | HIST2 | 152232689 | 0 |
| CEU | chr1 | HIST2 | 152282689 | 0 |
| CEU | chr1 | HIST2 | 152332689 | 0 |
| CEU | chr1 | HIST2 | 152382689 | 0 |
| CEU | chr1 | HIST2 | 152432689 | 0 |
| CEU | chr1 | HIST2 | 152482689 | 0 |
| CEU | chr1 | HIST2 | 152532689 | 0 |
| CEU | chr1 | HIST2 | 152582689 | 0 |
| CEU | chr1 | HIST2 | 152632689 | 0 |
| CEU | chr1 | HIST2 | 152682689 | 0 |
| CEU | chr1 | HIST2 | 152732689 | 0 |
| CEU | chr1 | HIST2 | 152782689 | 0 |
| CEU | chr1 | HIST2 | 152832689 | 0 |
| CEU | chr1 | HIST2 | 152882689 | 0 |
| CEU | chr1 | HIST2 | 152932689 | 0 |
| CEU | chr1 | HIST2 | 152982689 | 0 |
| CEU | chr1 | HIST2 | 153032689 | 0 |
| CEU | chr1 | HIST2 | 153082689 | 0 |
| CEU | chr1 | HIST2 | 153132689 | 0 |
| CEU | chr1 | HIST2 | 153182689 | 0 |
| CEU | chr1 | HIST2 | 153232689 | 0 |
| CEU | chr1 | HIST2 | 153282689 | 0 |
| CEU | chr1 | HIST2 | 153332689 | 0 |
| CEU | chr1 | HIST2 | 153382689 | 0 |
| CEU | chr1 | HIST2 | 153432689 | 0 |
| CEU | chr1 | HIST2 | 153482689 | 0 |
| CEU | chr1 | HIST2 | 153532689 | 0 |
| CEU | chr1 | HIST2 | 153582689 | 0 |
| CEU | chr1 | HIST2 | 153632689 | 0 |
| CEU | chr1 | HIST2 | 153682689 | 0 |
| CEU | chr1 | HIST2 | 153732689 | 0 |
| CEU | chr1 | HIST2 | 153782689 | 0 |
| CEU | chr1 | HIST2 | 153832689 | 0 |

### 3\_Introgression\_data

|     |      |       |           |     |
|-----|------|-------|-----------|-----|
| CEU | chr1 | HIST2 | 153882689 | 0   |
| CEU | chr1 | HIST2 | 153932689 | 0   |
| CEU | chr1 | HIST2 | 153982689 | 0   |
| CEU | chr1 | HIST2 | 154032689 | 0   |
| CEU | chr1 | HIST2 | 154082689 | 0   |
| CEU | chr1 | HIST2 | 154132689 | 0   |
| CEU | chr1 | HIST2 | 154182689 | 0   |
| CEU | chr1 | HIST2 | 154232689 | 0   |
| CEU | chr1 | HIST2 | 154282689 | 0   |
| CEU | chr1 | HIST2 | 154332689 | 0   |
| CEU | chr1 | HIST2 | 154382689 | 0   |
| CEU | chr1 | HIST2 | 154432689 | 0   |
| CEU | chr1 | HIST2 | 154482689 | 0   |
| CEU | chr1 | HIST2 | 154532689 | 0   |
| CEU | chr1 | HIST2 | 154582689 | 0   |
| CEU | chr1 | HIST2 | 154632689 | 0   |
| CEU | chr1 | HIST2 | 154682689 | 0   |
| CEU | chr1 | HIST2 | 154732689 | 0   |
| CEU | chr2 | LIMS3 | 104948688 | 0   |
| CEU | chr2 | LIMS3 | 104998688 | 0   |
| CEU | chr2 | LIMS3 | 105048688 | 0   |
| CEU | chr2 | LIMS3 | 105098688 | 0   |
| CEU | chr2 | LIMS3 | 105148688 | 0   |
| CEU | chr2 | LIMS3 | 105198688 | 0   |
| CEU | chr2 | LIMS3 | 105248688 | 0   |
| CEU | chr2 | LIMS3 | 105298688 | 0   |
| CEU | chr2 | LIMS3 | 105348688 | 0   |
| CEU | chr2 | LIMS3 | 105398688 | 0   |
| CEU | chr2 | LIMS3 | 105448688 | 0   |
| CEU | chr2 | LIMS3 | 105498688 | 0   |
| CEU | chr2 | LIMS3 | 105548688 | 0   |
| CEU | chr2 | LIMS3 | 105598688 | 0   |
| CEU | chr2 | LIMS3 | 105648688 | 0   |
| CEU | chr2 | LIMS3 | 105698688 | 0   |
| CEU | chr2 | LIMS3 | 105748688 | 0   |
| CEU | chr2 | LIMS3 | 105798688 | 0   |
| CEU | chr2 | LIMS3 | 105848688 | 0   |
| CEU | chr2 | LIMS3 | 105898688 | 0   |
| CEU | chr2 | LIMS3 | 105948688 | 0   |
| CEU | chr2 | LIMS3 | 105998688 | 0   |
| CEU | chr2 | LIMS3 | 106048688 | 0   |
| CEU | chr2 | LIMS3 | 106098688 | 0   |
| CEU | chr2 | LIMS3 | 106148688 | 0   |
| CEU | chr2 | LIMS3 | 106198688 | 0   |
| CEU | chr2 | LIMS3 | 106248688 | 10  |
| CEU | chr2 | LIMS3 | 106298688 | 46  |
| CEU | chr2 | LIMS3 | 106348688 | 110 |
| CEU | chr2 | LIMS3 | 106398688 | 119 |
| CEU | chr2 | LIMS3 | 106448688 | 58  |

### 3\_Introgression\_data

|     |      |       |           |    |
|-----|------|-------|-----------|----|
| CEU | chr2 | LIMS3 | 106498688 | 21 |
| CEU | chr2 | LIMS3 | 106548688 | 8  |
| CEU | chr2 | LIMS3 | 106598688 | 0  |
| CEU | chr2 | LIMS3 | 106648688 | 10 |
| CEU | chr2 | LIMS3 | 106698688 | 31 |
| CEU | chr2 | LIMS3 | 106748688 | 47 |
| CEU | chr2 | LIMS3 | 106798688 | 63 |
| CEU | chr2 | LIMS3 | 106848688 | 99 |
| CEU | chr2 | LIMS3 | 106898688 | 78 |
| CEU | chr2 | LIMS3 | 106948688 | 19 |
| CEU | chr2 | LIMS3 | 106998688 | 3  |
| CEU | chr2 | LIMS3 | 107048688 | 0  |
| CEU | chr2 | LIMS3 | 107098688 | 0  |
| CEU | chr2 | LIMS3 | 107148688 | 0  |
| CEU | chr2 | LIMS3 | 107198688 | 0  |
| CEU | chr2 | LIMS3 | 107248688 | 0  |
| CEU | chr2 | LIMS3 | 107298688 | 0  |
| CEU | chr2 | LIMS3 | 107348688 | 0  |
| CEU | chr2 | LIMS3 | 107398688 | 0  |
| CEU | chr2 | LIMS3 | 107448688 | 0  |
| CEU | chr2 | LIMS3 | 107498688 | 0  |
| CEU | chr2 | LIMS3 | 107548688 | 0  |
| CEU | chr2 | LIMS3 | 107598688 | 0  |
| CEU | chr2 | LIMS3 | 107648688 | 0  |
| CEU | chr2 | LIMS3 | 107698688 | 0  |
| CEU | chr2 | LIMS3 | 107748688 | 7  |
| CEU | chr2 | LIMS3 | 107798688 | 90 |
| CEU | chr2 | LIMS3 | 107848688 | 98 |
| CEU | chr2 | LIMS3 | 107898688 | 25 |
| CEU | chr2 | LIMS3 | 107948688 | 10 |
| CEU | chr2 | LIMS3 | 107998688 | 0  |
| CEU | chr2 | LIMS3 | 108048688 | 0  |
| CEU | chr2 | LIMS3 | 108098688 | 0  |
| CEU | chr2 | LIMS3 | 108148688 | 0  |
| CEU | chr2 | LIMS3 | 108198688 | 0  |
| CEU | chr2 | LIMS3 | 108248688 | 0  |
| CEU | chr2 | LIMS3 | 108298688 | 0  |
| CEU | chr2 | LIMS3 | 108348688 | 0  |
| CEU | chr2 | LIMS3 | 108398688 | 0  |
| CEU | chr2 | LIMS3 | 108448688 | 0  |
| CEU | chr2 | LIMS3 | 108498688 | 0  |
| CEU | chr2 | LIMS3 | 108548688 | 0  |
| CEU | chr2 | LIMS3 | 108598688 | 0  |
| CEU | chr2 | LIMS3 | 108648688 | 0  |
| CEU | chr2 | LIMS3 | 108698688 | 0  |
| CEU | chr2 | LIMS3 | 108748688 | 0  |
| CEU | chr2 | LIMS3 | 108798688 | 0  |
| CEU | chr2 | LIMS3 | 108848688 | 0  |
| CEU | chr2 | LIMS3 | 108898688 | 0  |

## 3\_Introgression\_data

|     |      |       |           |    |
|-----|------|-------|-----------|----|
| CEU | chr2 | LIMS3 | 108948688 | 5  |
| CEU | chr2 | LIMS3 | 108998688 | 28 |
| CEU | chr2 | LIMS3 | 109048688 | 41 |
| CEU | chr2 | LIMS3 | 109098688 | 34 |
| CEU | chr2 | LIMS3 | 109148688 | 37 |
| CEU | chr2 | LIMS3 | 109198688 | 42 |
| CEU | chr2 | LIMS3 | 109248688 | 37 |
| CEU | chr2 | LIMS3 | 109298688 | 34 |
| CEU | chr2 | LIMS3 | 109348688 | 27 |
| CEU | chr2 | LIMS3 | 109398688 | 25 |
| CEU | chr2 | LIMS3 | 109448688 | 28 |
| CEU | chr2 | LIMS3 | 109498688 | 32 |
| CEU | chr2 | LIMS3 | 109548688 | 51 |
| CEU | chr2 | LIMS3 | 109598688 | 59 |
| CEU | chr2 | LIMS3 | 109648688 | 28 |
| CEU | chr2 | LIMS3 | 109698688 | 0  |
| CEU | chr2 | LIMS3 | 109748688 | 0  |
| CEU | chr2 | LIMS3 | 109798688 | 0  |
| CEU | chr2 | LIMS3 | 109848688 | 0  |
| CEU | chr2 | LIMS3 | 109898688 | 0  |
| CEU | chr2 | LIMS3 | 109948688 | 0  |
| CEU | chr2 | LIMS3 | 109998688 | 0  |
| CEU | chr2 | LIMS3 | 110048688 | 0  |
| CEU | chr2 | LIMS3 | 110098688 | 0  |
| CEU | chr2 | LIMS3 | 110148688 | 0  |
| CEU | chr2 | LIMS3 | 110198688 | 0  |
| CEU | chr2 | LIMS3 | 110248688 | 0  |
| CEU | chr2 | LIMS3 | 110298688 | 0  |
| CEU | chr2 | LIMS3 | 110348688 | 0  |
| CEU | chr2 | LIMS3 | 110398688 | 0  |
| CEU | chr2 | LIMS3 | 110448688 | 0  |
| CEU | chr2 | LIMS3 | 110498688 | 0  |
| CEU | chr2 | LIMS3 | 110548688 | 0  |
| CEU | chr2 | LIMS3 | 110598688 | 0  |
| CEU | chr2 | LIMS3 | 110648688 | 0  |
| CEU | chr2 | LIMS3 | 110698688 | 0  |
| CEU | chr2 | LIMS3 | 110748688 | 0  |
| CEU | chr2 | LIMS3 | 110798688 | 0  |
| CEU | chr2 | LIMS3 | 110848688 | 0  |
| CEU | chr2 | LIMS3 | 110898688 | 0  |
| CEU | chr2 | LIMS3 | 110948688 | 0  |
| CEU | chr2 | LIMS3 | 110998688 | 0  |
| CEU | chr2 | LIMS3 | 111048688 | 0  |
| CEU | chr2 | LIMS3 | 111098688 | 0  |
| CEU | chr2 | LIMS3 | 111148688 | 0  |
| CEU | chr2 | LIMS3 | 111198688 | 0  |
| CEU | chr2 | LIMS3 | 111248688 | 0  |
| CEU | chr2 | LIMS3 | 111298688 | 0  |
| CEU | chr2 | LIMS3 | 111348688 | 0  |



### 3\_Introgression\_data

|     |      |       |           |   |
|-----|------|-------|-----------|---|
| CEU | chr2 | LIMS3 | 111398688 | 0 |
| CEU | chr2 | LIMS3 | 111448688 | 0 |
| CEU | chr2 | LIMS3 | 111498688 | 0 |
| CEU | chr2 | LIMS3 | 111548688 | 0 |
| CEU | chr2 | LIMS3 | 111598688 | 0 |
| CEU | chr2 | LIMS3 | 111648688 | 0 |
| CEU | chr2 | LIMS3 | 111698688 | 0 |
| CEU | chr2 | LIMS3 | 111748688 | 0 |
| CEU | chr2 | LIMS3 | 111798688 | 0 |
| CEU | chr2 | LIMS3 | 111848688 | 0 |
| CEU | chr2 | LIMS3 | 111898688 | 0 |
| CEU | chr2 | LIMS3 | 111948688 | 0 |
| CEU | chr2 | LIMS3 | 111998688 | 0 |
| CEU | chr2 | LIMS3 | 112048688 | 0 |
| CEU | chr2 | LIMS3 | 112098688 | 0 |
| CEU | chr2 | LIMS3 | 112148688 | 0 |
| CEU | chr2 | LIMS3 | 112198688 | 0 |
| CEU | chr2 | LIMS3 | 112248688 | 0 |
| CEU | chr2 | LIMS3 | 112298688 | 0 |
| CEU | chr2 | LIMS3 | 112348688 | 0 |
| CEU | chr2 | LIMS3 | 112398688 | 0 |
| CEU | chr2 | LIMS3 | 112448688 | 0 |
| CEU | chr2 | LIMS3 | 112498688 | 0 |
| CEU | chr2 | LIMS3 | 112548688 | 0 |
| CEU | chr2 | LIMS3 | 112598688 | 0 |
| CEU | chr2 | LIMS3 | 112648688 | 0 |
| CEU | chr2 | LIMS3 | 112698688 | 0 |
| CEU | chr2 | LIMS3 | 112748688 | 0 |
| CEU | chr2 | LIMS3 | 112798688 | 0 |
| CEU | chr2 | LIMS3 | 112848688 | 0 |
| CEU | chr2 | LIMS3 | 112898688 | 0 |
| CEU | chr2 | LIMS3 | 112948688 | 0 |
| CEU | chr2 | LIMS3 | 112998688 | 0 |
| CEU | chr2 | LIMS3 | 113048688 | 0 |
| CEU | chr2 | LIMS3 | 113098688 | 0 |
| CEU | chr2 | LIMS3 | 113148688 | 0 |
| CEU | chr2 | LIMS3 | 113198688 | 0 |
| CEU | chr2 | LIMS3 | 113248688 | 0 |
| CEU | chr2 | LIMS3 | 113298688 | 0 |
| CEU | chr2 | LIMS3 | 113348688 | 0 |
| CEU | chr2 | LIMS3 | 113398688 | 0 |
| CEU | chr2 | LIMS3 | 113448688 | 0 |
| CEU | chr2 | LIMS3 | 113498688 | 0 |
| CEU | chr2 | LIMS3 | 113548688 | 0 |
| CEU | chr2 | LIMS3 | 113598688 | 0 |
| CEU | chr2 | LIMS3 | 113648688 | 0 |
| CEU | chr2 | LIMS3 | 113698688 | 0 |
| CEU | chr2 | LIMS3 | 113748688 | 0 |
| CEU | chr2 | LIMS3 | 113798688 | 0 |

### 3\_Introgression\_data

|     |      |       |           |    |
|-----|------|-------|-----------|----|
| CEU | chr2 | LIMS3 | 113848688 | 0  |
| CEU | chr2 | LIMS3 | 113898688 | 0  |
| CEU | chr2 | LIMS3 | 113948688 | 0  |
| CEU | chr2 | LIMS3 | 113998688 | 0  |
| CEU | chr2 | LIMS3 | 114048688 | 0  |
| CEU | chr2 | LIMS3 | 114098688 | 0  |
| CEU | chr2 | LIMS3 | 114148688 | 0  |
| CEU | chr2 | LIMS3 | 114198688 | 0  |
| CEU | chr2 | LIMS3 | 114248688 | 14 |
| CEU | chr2 | LIMS3 | 114298688 | 24 |
| CEU | chr2 | LIMS3 | 114348688 | 10 |
| CEU | chr2 | LIMS3 | 114398688 | 0  |
| CEU | chr2 | LIMS3 | 114448688 | 0  |
| CEU | chr2 | LIMS3 | 114498688 | 0  |
| CEU | chr2 | LIMS3 | 114548688 | 0  |
| CEU | chr2 | LIMS3 | 114598688 | 0  |
| CEU | chr2 | LIMS3 | 114648688 | 0  |
| CEU | chr2 | LIMS3 | 114698688 | 0  |
| CEU | chr2 | LIMS3 | 114748688 | 0  |
| CEU | chr2 | LIMS3 | 114798688 | 0  |
| CEU | chr2 | LIMS3 | 114848688 | 0  |
| CEU | chr7 | MUC12 | 96019565  | 0  |
| CEU | chr7 | MUC12 | 96069565  | 0  |
| CEU | chr7 | MUC12 | 96119565  | 0  |
| CEU | chr7 | MUC12 | 96169565  | 0  |
| CEU | chr7 | MUC12 | 96219565  | 0  |
| CEU | chr7 | MUC12 | 96269565  | 0  |
| CEU | chr7 | MUC12 | 96319565  | 0  |
| CEU | chr7 | MUC12 | 96369565  | 0  |
| CEU | chr7 | MUC12 | 96419565  | 0  |
| CEU | chr7 | MUC12 | 96469565  | 0  |
| CEU | chr7 | MUC12 | 96519565  | 0  |
| CEU | chr7 | MUC12 | 96569565  | 0  |
| CEU | chr7 | MUC12 | 96619565  | 0  |
| CEU | chr7 | MUC12 | 96669565  | 0  |
| CEU | chr7 | MUC12 | 96719565  | 0  |
| CEU | chr7 | MUC12 | 96769565  | 0  |
| CEU | chr7 | MUC12 | 96819565  | 0  |
| CEU | chr7 | MUC12 | 96869565  | 0  |
| CEU | chr7 | MUC12 | 96919565  | 0  |
| CEU | chr7 | MUC12 | 96969565  | 0  |
| CEU | chr7 | MUC12 | 97019565  | 0  |
| CEU | chr7 | MUC12 | 97069565  | 0  |
| CEU | chr7 | MUC12 | 97119565  | 0  |
| CEU | chr7 | MUC12 | 97169565  | 0  |
| CEU | chr7 | MUC12 | 97219565  | 0  |
| CEU | chr7 | MUC12 | 97269565  | 0  |
| CEU | chr7 | MUC12 | 97319565  | 0  |
| CEU | chr7 | MUC12 | 97369565  | 0  |

### 3\_Introgression\_data

|     |      |       |          |   |
|-----|------|-------|----------|---|
| CEU | chr7 | MUC12 | 97419565 | 0 |
| CEU | chr7 | MUC12 | 97469565 | 0 |
| CEU | chr7 | MUC12 | 97519565 | 0 |
| CEU | chr7 | MUC12 | 97569565 | 0 |
| CEU | chr7 | MUC12 | 97619565 | 0 |
| CEU | chr7 | MUC12 | 97669565 | 0 |
| CEU | chr7 | MUC12 | 97719565 | 0 |
| CEU | chr7 | MUC12 | 97769565 | 0 |
| CEU | chr7 | MUC12 | 97819565 | 0 |
| CEU | chr7 | MUC12 | 97869565 | 0 |
| CEU | chr7 | MUC12 | 97919565 | 0 |
| CEU | chr7 | MUC12 | 97969565 | 0 |
| CEU | chr7 | MUC12 | 98019565 | 0 |
| CEU | chr7 | MUC12 | 98069565 | 0 |
| CEU | chr7 | MUC12 | 98119565 | 0 |
| CEU | chr7 | MUC12 | 98169565 | 0 |
| CEU | chr7 | MUC12 | 98219565 | 0 |
| CEU | chr7 | MUC12 | 98269565 | 0 |
| CEU | chr7 | MUC12 | 98319565 | 0 |
| CEU | chr7 | MUC12 | 98369565 | 0 |
| CEU | chr7 | MUC12 | 98419565 | 0 |
| CEU | chr7 | MUC12 | 98469565 | 0 |
| CEU | chr7 | MUC12 | 98519565 | 0 |
| CEU | chr7 | MUC12 | 98569565 | 0 |
| CEU | chr7 | MUC12 | 98619565 | 0 |
| CEU | chr7 | MUC12 | 98669565 | 0 |
| CEU | chr7 | MUC12 | 98719565 | 0 |
| CEU | chr7 | MUC12 | 98769565 | 0 |
| CEU | chr7 | MUC12 | 98819565 | 0 |
| CEU | chr7 | MUC12 | 98869565 | 0 |
| CEU | chr7 | MUC12 | 98919565 | 0 |
| CEU | chr7 | MUC12 | 98969565 | 0 |
| CEU | chr7 | MUC12 | 99019565 | 0 |
| CEU | chr7 | MUC12 | 99069565 | 0 |
| CEU | chr7 | MUC12 | 99119565 | 0 |
| CEU | chr7 | MUC12 | 99169565 | 0 |
| CEU | chr7 | MUC12 | 99219565 | 0 |
| CEU | chr7 | MUC12 | 99269565 | 0 |
| CEU | chr7 | MUC12 | 99319565 | 0 |
| CEU | chr7 | MUC12 | 99369565 | 0 |
| CEU | chr7 | MUC12 | 99419565 | 0 |
| CEU | chr7 | MUC12 | 99469565 | 0 |
| CEU | chr7 | MUC12 | 99519565 | 0 |
| CEU | chr7 | MUC12 | 99569565 | 0 |
| CEU | chr7 | MUC12 | 99619565 | 0 |
| CEU | chr7 | MUC12 | 99669565 | 0 |
| CEU | chr7 | MUC12 | 99719565 | 0 |
| CEU | chr7 | MUC12 | 99769565 | 0 |
| CEU | chr7 | MUC12 | 99819565 | 0 |

3\_Introgression\_data

|     |      |       |           |    |
|-----|------|-------|-----------|----|
| CEU | chr7 | MUC12 | 99869565  | 0  |
| CEU | chr7 | MUC12 | 99919565  | 0  |
| CEU | chr7 | MUC12 | 99969565  | 0  |
| CEU | chr7 | MUC12 | 100019565 | 0  |
| CEU | chr7 | MUC12 | 100069565 | 0  |
| CEU | chr7 | MUC12 | 100119565 | 0  |
| CEU | chr7 | MUC12 | 100169565 | 0  |
| CEU | chr7 | MUC12 | 100219565 | 0  |
| CEU | chr7 | MUC12 | 100269565 | 0  |
| CEU | chr7 | MUC12 | 100319565 | 0  |
| CEU | chr7 | MUC12 | 100369565 | 0  |
| CEU | chr7 | MUC12 | 100419565 | 0  |
| CEU | chr7 | MUC12 | 100469565 | 0  |
| CEU | chr7 | MUC12 | 100519565 | 0  |
| CEU | chr7 | MUC12 | 100569565 | 0  |
| CEU | chr7 | MUC12 | 100619565 | 0  |
| CEU | chr7 | MUC12 | 100669565 | 0  |
| CEU | chr7 | MUC12 | 100719565 | 0  |
| CEU | chr7 | MUC12 | 100769565 | 0  |
| CEU | chr7 | MUC12 | 100819565 | 0  |
| CEU | chr7 | MUC12 | 100869565 | 0  |
| CEU | chr7 | MUC12 | 100919565 | 0  |
| CEU | chr7 | MUC12 | 100969565 | 0  |
| CEU | chr7 | MUC12 | 101019565 | 0  |
| CEU | chr7 | MUC12 | 101069565 | 0  |
| CEU | chr7 | MUC12 | 101119565 | 0  |
| CEU | chr7 | MUC12 | 101169565 | 0  |
| CEU | chr7 | MUC12 | 101219565 | 0  |
| CEU | chr7 | MUC12 | 101269565 | 0  |
| CEU | chr7 | MUC12 | 101319565 | 55 |
| CEU | chr7 | MUC12 | 101369565 | 57 |
| CEU | chr7 | MUC12 | 101419565 | 2  |
| CEU | chr7 | MUC12 | 101469565 | 0  |
| CEU | chr7 | MUC12 | 101519565 | 0  |
| CEU | chr7 | MUC12 | 101569565 | 0  |
| CEU | chr7 | MUC12 | 101619565 | 0  |
| CEU | chr7 | MUC12 | 101669565 | 0  |
| CEU | chr7 | MUC12 | 101719565 | 0  |
| CEU | chr7 | MUC12 | 101769565 | 0  |
| CEU | chr7 | MUC12 | 101819565 | 0  |
| CEU | chr7 | MUC12 | 101869565 | 0  |
| CEU | chr7 | MUC12 | 101919565 | 0  |
| CEU | chr7 | MUC12 | 101969565 | 0  |
| CEU | chr7 | MUC12 | 102019565 | 0  |
| CEU | chr7 | MUC12 | 102069565 | 0  |
| CEU | chr7 | MUC12 | 102119565 | 0  |
| CEU | chr7 | MUC12 | 102169565 | 0  |
| CEU | chr7 | MUC12 | 102219565 | 0  |
| CEU | chr7 | MUC12 | 102269565 | 0  |

## 3\_Introgression\_data

|     |      |       |           |   |
|-----|------|-------|-----------|---|
| CEU | chr7 | MUC12 | 102319565 | 0 |
| CEU | chr7 | MUC12 | 102369565 | 0 |
| CEU | chr7 | MUC12 | 102419565 | 0 |
| CEU | chr7 | MUC12 | 102469565 | 0 |
| CEU | chr7 | MUC12 | 102519565 | 0 |
| CEU | chr7 | MUC12 | 102569565 | 0 |
| CEU | chr7 | MUC12 | 102619565 | 0 |
| CEU | chr7 | MUC12 | 102669565 | 0 |
| CEU | chr7 | MUC12 | 102719565 | 0 |
| CEU | chr7 | MUC12 | 102769565 | 0 |
| CEU | chr7 | MUC12 | 102819565 | 0 |
| CEU | chr7 | MUC12 | 102869565 | 0 |
| CEU | chr7 | MUC12 | 102919565 | 0 |
| CEU | chr7 | MUC12 | 102969565 | 0 |
| CEU | chr7 | MUC12 | 103019565 | 0 |
| CEU | chr7 | MUC12 | 103069565 | 0 |
| CEU | chr7 | MUC12 | 103119565 | 0 |
| CEU | chr7 | MUC12 | 103169565 | 0 |
| CEU | chr7 | MUC12 | 103219565 | 0 |
| CEU | chr7 | MUC12 | 103269565 | 0 |
| CEU | chr7 | MUC12 | 103319565 | 0 |
| CEU | chr7 | MUC12 | 103369565 | 0 |
| CEU | chr7 | MUC12 | 103419565 | 0 |
| CEU | chr7 | MUC12 | 103469565 | 0 |
| CEU | chr7 | MUC12 | 103519565 | 0 |
| CEU | chr7 | MUC12 | 103569565 | 0 |
| CEU | chr7 | MUC12 | 103619565 | 0 |
| CEU | chr7 | MUC12 | 103669565 | 0 |
| CEU | chr7 | MUC12 | 103719565 | 0 |
| CEU | chr7 | MUC12 | 103769565 | 0 |
| CEU | chr7 | MUC12 | 103819565 | 0 |
| CEU | chr7 | MUC12 | 103869565 | 0 |
| CEU | chr7 | MUC12 | 103919565 | 0 |
| CEU | chr7 | MUC12 | 103969565 | 0 |
| CEU | chr7 | MUC12 | 104019565 | 0 |
| CEU | chr7 | MUC12 | 104069565 | 0 |
| CEU | chr7 | MUC12 | 104119565 | 0 |
| CEU | chr7 | MUC12 | 104169565 | 0 |
| CEU | chr7 | MUC12 | 104219565 | 0 |
| CEU | chr7 | MUC12 | 104269565 | 0 |
| CEU | chr7 | MUC12 | 104319565 | 0 |
| CEU | chr7 | MUC12 | 104369565 | 0 |
| CEU | chr7 | MUC12 | 104419565 | 0 |
| CEU | chr7 | MUC12 | 104469565 | 0 |
| CEU | chr7 | MUC12 | 104519565 | 0 |
| CEU | chr7 | MUC12 | 104569565 | 0 |
| CEU | chr7 | MUC12 | 104619565 | 0 |
| CEU | chr7 | MUC12 | 104669565 | 0 |
| CEU | chr7 | MUC12 | 104719565 | 0 |

### 3\_Introgression\_data

|     |      |        |           |    |
|-----|------|--------|-----------|----|
| CEU | chr7 | MUC12  | 104769565 | 0  |
| CEU | chr7 | MUC12  | 104819565 | 0  |
| CEU | chr7 | MUC12  | 104869565 | 0  |
| CEU | chr7 | MUC12  | 104919565 | 0  |
| CEU | chr7 | MUC12  | 104969565 | 0  |
| CEU | chr7 | MUC12  | 105019565 | 0  |
| CEU | chr7 | MUC12  | 105069565 | 0  |
| CEU | chr7 | MUC12  | 105119565 | 0  |
| CEU | chr7 | MUC12  | 105169565 | 0  |
| CEU | chr7 | MUC12  | 105219565 | 0  |
| CEU | chr7 | MUC12  | 105269565 | 0  |
| CEU | chr7 | MUC12  | 105319565 | 0  |
| CEU | chr7 | MUC12  | 105369565 | 0  |
| CEU | chr7 | MUC12  | 105419565 | 0  |
| CEU | chr7 | MUC12  | 105469565 | 0  |
| CEU | chr7 | MUC12  | 105519565 | 0  |
| CEU | chr7 | MUC12  | 105569565 | 0  |
| CEU | chr7 | MUC12  | 105619565 | 0  |
| CEU | chr7 | MUC12  | 105669565 | 0  |
| CEU | chr7 | MUC12  | 105719565 | 0  |
| CEU | chr7 | MUC12  | 105769565 | 0  |
| CEU | chr7 | MUC12  | 105819565 | 0  |
| CEU | chr7 | MUC12  | 105869565 | 0  |
| CEU | chr7 | MUC12  | 105919565 | 0  |
| CEU | chr1 | NBPF11 | 143152151 | 50 |
| CEU | chr1 | NBPF11 | 143202151 | 56 |
| CEU | chr1 | NBPF11 | 143252151 | 59 |
| CEU | chr1 | NBPF11 | 143302151 | 26 |
| CEU | chr1 | NBPF11 | 143352151 | 0  |
| CEU | chr1 | NBPF11 | 143402151 | 0  |
| CEU | chr1 | NBPF11 | 143452151 | 0  |
| CEU | chr1 | NBPF11 | 143502151 | 0  |
| CEU | chr1 | NBPF11 | 143552151 | 0  |
| CEU | chr1 | NBPF11 | 143602151 | 0  |
| CEU | chr1 | NBPF11 | 143652151 | 0  |
| CEU | chr1 | NBPF11 | 143702151 | 0  |
| CEU | chr1 | NBPF11 | 143752151 | 0  |
| CEU | chr1 | NBPF11 | 143802151 | 0  |
| CEU | chr1 | NBPF11 | 143852151 | 0  |
| CEU | chr1 | NBPF11 | 143902151 | 0  |
| CEU | chr1 | NBPF11 | 143952151 | 0  |
| CEU | chr1 | NBPF11 | 144002151 | 0  |
| CEU | chr1 | NBPF11 | 144052151 | 0  |
| CEU | chr1 | NBPF11 | 144102151 | 0  |
| CEU | chr1 | NBPF11 | 144152151 | 0  |
| CEU | chr1 | NBPF11 | 144202151 | 0  |
| CEU | chr1 | NBPF11 | 144252151 | 0  |
| CEU | chr1 | NBPF11 | 144302151 | 0  |
| CEU | chr1 | NBPF11 | 144352151 | 0  |

### 3\_Introgression\_data

|     |      |        |           |    |
|-----|------|--------|-----------|----|
| CEU | chr1 | NBPF11 | 144402151 | 0  |
| CEU | chr1 | NBPF11 | 144452151 | 0  |
| CEU | chr1 | NBPF11 | 144502151 | 0  |
| CEU | chr1 | NBPF11 | 144552151 | 0  |
| CEU | chr1 | NBPF11 | 144602151 | 0  |
| CEU | chr1 | NBPF11 | 144652151 | 0  |
| CEU | chr1 | NBPF11 | 144702151 | 0  |
| CEU | chr1 | NBPF11 | 144752151 | 0  |
| CEU | chr1 | NBPF11 | 144802151 | 0  |
| CEU | chr1 | NBPF11 | 144852151 | 0  |
| CEU | chr1 | NBPF11 | 144902151 | 0  |
| CEU | chr1 | NBPF11 | 144952151 | 0  |
| CEU | chr1 | NBPF11 | 145002151 | 0  |
| CEU | chr1 | NBPF11 | 145052151 | 0  |
| CEU | chr1 | NBPF11 | 145102151 | 0  |
| CEU | chr1 | NBPF11 | 145152151 | 0  |
| CEU | chr1 | NBPF11 | 145202151 | 0  |
| CEU | chr1 | NBPF11 | 145252151 | 0  |
| CEU | chr1 | NBPF11 | 145302151 | 0  |
| CEU | chr1 | NBPF11 | 145352151 | 0  |
| CEU | chr1 | NBPF11 | 145402151 | 0  |
| CEU | chr1 | NBPF11 | 145452151 | 0  |
| CEU | chr1 | NBPF11 | 145502151 | 0  |
| CEU | chr1 | NBPF11 | 145552151 | 0  |
| CEU | chr1 | NBPF11 | 145602151 | 0  |
| CEU | chr1 | NBPF11 | 145652151 | 0  |
| CEU | chr1 | NBPF11 | 145702151 | 0  |
| CEU | chr1 | NBPF11 | 145752151 | 0  |
| CEU | chr1 | NBPF11 | 145802151 | 0  |
| CEU | chr1 | NBPF11 | 145852151 | 0  |
| CEU | chr1 | NBPF11 | 145902151 | 0  |
| CEU | chr1 | NBPF11 | 145952151 | 0  |
| CEU | chr1 | NBPF11 | 146002151 | 0  |
| CEU | chr1 | NBPF11 | 146052151 | 0  |
| CEU | chr1 | NBPF11 | 146102151 | 0  |
| CEU | chr1 | NBPF11 | 146152151 | 0  |
| CEU | chr1 | NBPF11 | 146202151 | 0  |
| CEU | chr1 | NBPF11 | 146252151 | 0  |
| CEU | chr1 | NBPF11 | 146302151 | 0  |
| CEU | chr1 | NBPF11 | 146352151 | 0  |
| CEU | chr1 | NBPF11 | 146402151 | 0  |
| CEU | chr1 | NBPF11 | 146452151 | 8  |
| CEU | chr1 | NBPF11 | 146502151 | 34 |
| CEU | chr1 | NBPF11 | 146552151 | 55 |
| CEU | chr1 | NBPF11 | 146602151 | 40 |
| CEU | chr1 | NBPF11 | 146652151 | 37 |
| CEU | chr1 | NBPF11 | 146702151 | 43 |
| CEU | chr1 | NBPF11 | 146752151 | 36 |
| CEU | chr1 | NBPF11 | 146802151 | 38 |

3\_Introgression\_data

|     |      |        |           |     |
|-----|------|--------|-----------|-----|
| CEU | chr1 | NBPF11 | 146852151 | 44  |
| CEU | chr1 | NBPF11 | 146902151 | 47  |
| CEU | chr1 | NBPF11 | 146952151 | 33  |
| CEU | chr1 | NBPF11 | 147002151 | 24  |
| CEU | chr1 | NBPF11 | 147052151 | 31  |
| CEU | chr1 | NBPF11 | 147102151 | 33  |
| CEU | chr1 | NBPF11 | 147152151 | 34  |
| CEU | chr1 | NBPF11 | 147202151 | 63  |
| CEU | chr1 | NBPF11 | 147252151 | 114 |
| CEU | chr1 | NBPF11 | 147302151 | 110 |
| CEU | chr1 | NBPF11 | 147352151 | 60  |
| CEU | chr1 | NBPF11 | 147402151 | 24  |
| CEU | chr1 | NBPF11 | 147452151 | 4   |
| CEU | chr1 | NBPF11 | 147502151 | 0   |
| CEU | chr1 | NBPF11 | 147552151 | 0   |
| CEU | chr1 | NBPF11 | 147602151 | 0   |
| CEU | chr1 | NBPF11 | 147652151 | 0   |
| CEU | chr1 | NBPF11 | 147702151 | 0   |
| CEU | chr1 | NBPF11 | 147752151 | 0   |
| CEU | chr1 | NBPF11 | 147802151 | 0   |
| CEU | chr1 | NBPF11 | 147852151 | 0   |
| CEU | chr1 | NBPF11 | 147902151 | 0   |
| CEU | chr1 | NBPF11 | 147952151 | 0   |
| CEU | chr1 | NBPF11 | 148002151 | 0   |
| CEU | chr1 | NBPF11 | 148052151 | 0   |
| CEU | chr1 | NBPF11 | 148102151 | 0   |
| CEU | chr1 | NBPF11 | 148152151 | 0   |
| CEU | chr1 | NBPF11 | 148202151 | 0   |
| CEU | chr1 | NBPF11 | 148252151 | 0   |
| CEU | chr1 | NBPF11 | 148302151 | 0   |
| CEU | chr1 | NBPF11 | 148352151 | 0   |
| CEU | chr1 | NBPF11 | 148402151 | 0   |
| CEU | chr1 | NBPF11 | 148452151 | 0   |
| CEU | chr1 | NBPF11 | 148502151 | 0   |
| CEU | chr1 | NBPF11 | 148552151 | 0   |
| CEU | chr1 | NBPF11 | 148602151 | 0   |
| CEU | chr1 | NBPF11 | 148652151 | 0   |
| CEU | chr1 | NBPF11 | 148702151 | 0   |
| CEU | chr1 | NBPF11 | 148752151 | 0   |
| CEU | chr1 | NBPF11 | 148802151 | 0   |
| CEU | chr1 | NBPF11 | 148852151 | 0   |
| CEU | chr1 | NBPF11 | 148902151 | 0   |
| CEU | chr1 | NBPF11 | 148952151 | 0   |
| CEU | chr1 | NBPF11 | 149002151 | 0   |
| CEU | chr1 | NBPF11 | 149052151 | 0   |
| CEU | chr1 | NBPF11 | 149102151 | 0   |
| CEU | chr1 | NBPF11 | 149152151 | 0   |
| CEU | chr1 | NBPF11 | 149202151 | 0   |
| CEU | chr1 | NBPF11 | 149252151 | 0   |



### 3\_Introgression\_data

|     |      |        |           |    |
|-----|------|--------|-----------|----|
| CEU | chr1 | NBPF11 | 149302151 | 0  |
| CEU | chr1 | NBPF11 | 149352151 | 0  |
| CEU | chr1 | NBPF11 | 149402151 | 0  |
| CEU | chr1 | NBPF11 | 149452151 | 0  |
| CEU | chr1 | NBPF11 | 149502151 | 0  |
| CEU | chr1 | NBPF11 | 149552151 | 0  |
| CEU | chr1 | NBPF11 | 149602151 | 0  |
| CEU | chr1 | NBPF11 | 149652151 | 0  |
| CEU | chr1 | NBPF11 | 149702151 | 19 |
| CEU | chr1 | NBPF11 | 149752151 | 43 |
| CEU | chr1 | NBPF11 | 149802151 | 24 |
| CEU | chr1 | NBPF11 | 149852151 | 0  |
| CEU | chr1 | NBPF11 | 149902151 | 0  |
| CEU | chr1 | NBPF11 | 149952151 | 0  |
| CEU | chr1 | NBPF11 | 150002151 | 0  |
| CEU | chr1 | NBPF11 | 150052151 | 0  |
| CEU | chr1 | NBPF11 | 150102151 | 0  |
| CEU | chr1 | NBPF11 | 150152151 | 0  |
| CEU | chr1 | NBPF11 | 150202151 | 0  |
| CEU | chr1 | NBPF11 | 150252151 | 0  |
| CEU | chr1 | NBPF11 | 150302151 | 0  |
| CEU | chr1 | NBPF11 | 150352151 | 0  |
| CEU | chr1 | NBPF11 | 150402151 | 0  |
| CEU | chr1 | NBPF11 | 150452151 | 0  |
| CEU | chr1 | NBPF11 | 150502151 | 4  |
| CEU | chr1 | NBPF11 | 150552151 | 26 |
| CEU | chr1 | NBPF11 | 150602151 | 46 |
| CEU | chr1 | NBPF11 | 150652151 | 43 |
| CEU | chr1 | NBPF11 | 150702151 | 37 |
| CEU | chr1 | NBPF11 | 150752151 | 42 |
| CEU | chr1 | NBPF11 | 150802151 | 41 |
| CEU | chr1 | NBPF11 | 150852151 | 41 |
| CEU | chr1 | NBPF11 | 150902151 | 39 |
| CEU | chr1 | NBPF11 | 150952151 | 52 |
| CEU | chr1 | NBPF11 | 151002151 | 53 |
| CEU | chr1 | NBPF11 | 151052151 | 31 |
| CEU | chr1 | NBPF11 | 151102151 | 42 |
| CEU | chr1 | NBPF11 | 151152151 | 34 |
| CEU | chr1 | NBPF11 | 151202151 | 7  |
| CEU | chr1 | NBPF11 | 151252151 | 0  |
| CEU | chr1 | NBPF11 | 151302151 | 0  |
| CEU | chr1 | NBPF11 | 151352151 | 0  |
| CEU | chr1 | NBPF11 | 151402151 | 0  |
| CEU | chr1 | NBPF11 | 151452151 | 0  |
| CEU | chr1 | NBPF11 | 151502151 | 0  |
| CEU | chr1 | NBPF11 | 151552151 | 0  |
| CEU | chr1 | NBPF11 | 151602151 | 0  |
| CEU | chr1 | NBPF11 | 151652151 | 0  |
| CEU | chr1 | NBPF11 | 151702151 | 0  |

### 3\_Introgression\_data

|     |      |        |           |   |
|-----|------|--------|-----------|---|
| CEU | chr1 | NBPF11 | 151752151 | 0 |
| CEU | chr1 | NBPF11 | 151802151 | 0 |
| CEU | chr1 | NBPF11 | 151852151 | 0 |
| CEU | chr1 | NBPF11 | 151902151 | 0 |
| CEU | chr1 | NBPF11 | 151952151 | 0 |
| CEU | chr1 | NBPF11 | 152002151 | 0 |
| CEU | chr1 | NBPF11 | 152052151 | 0 |
| CEU | chr1 | NBPF11 | 152102151 | 0 |
| CEU | chr1 | NBPF11 | 152152151 | 0 |
| CEU | chr1 | NBPF11 | 152202151 | 0 |
| CEU | chr1 | NBPF11 | 152252151 | 0 |
| CEU | chr1 | NBPF11 | 152302151 | 0 |
| CEU | chr1 | NBPF11 | 152352151 | 0 |
| CEU | chr1 | NBPF11 | 152402151 | 0 |
| CEU | chr1 | NBPF11 | 152452151 | 0 |
| CEU | chr1 | NBPF11 | 152502151 | 0 |
| CEU | chr1 | NBPF11 | 152552151 | 0 |
| CEU | chr1 | NBPF11 | 152602151 | 0 |
| CEU | chr1 | NBPF11 | 152652151 | 0 |
| CEU | chr1 | NBPF11 | 152702151 | 0 |
| CEU | chr1 | NBPF11 | 152752151 | 0 |
| CEU | chr1 | NBPF11 | 152802151 | 0 |
| CEU | chr1 | NBPF11 | 152852151 | 0 |
| CEU | chr1 | NBPF11 | 152902151 | 0 |
| CEU | chr1 | NBPF11 | 152952151 | 0 |
| CEU | chr1 | NBPF11 | 153002151 | 0 |
| CEU | chr1 | NBPF11 | 153052151 | 0 |
| CEU | chr1 | NBPF11 | 153102151 | 0 |
| CEU | chr1 | NBPF16 | 139471390 | 0 |
| CEU | chr1 | NBPF16 | 139521390 | 0 |
| CEU | chr1 | NBPF16 | 139571390 | 0 |
| CEU | chr1 | NBPF16 | 139621390 | 0 |
| CEU | chr1 | NBPF16 | 139671390 | 0 |
| CEU | chr1 | NBPF16 | 139721390 | 0 |
| CEU | chr1 | NBPF16 | 139771390 | 0 |
| CEU | chr1 | NBPF16 | 139821390 | 0 |
| CEU | chr1 | NBPF16 | 139871390 | 0 |
| CEU | chr1 | NBPF16 | 139921390 | 0 |
| CEU | chr1 | NBPF16 | 139971390 | 0 |
| CEU | chr1 | NBPF16 | 140021390 | 0 |
| CEU | chr1 | NBPF16 | 140071390 | 0 |
| CEU | chr1 | NBPF16 | 140121390 | 0 |
| CEU | chr1 | NBPF16 | 140171390 | 0 |
| CEU | chr1 | NBPF16 | 140221390 | 0 |
| CEU | chr1 | NBPF16 | 140271390 | 0 |
| CEU | chr1 | NBPF16 | 140321390 | 0 |
| CEU | chr1 | NBPF16 | 140371390 | 0 |
| CEU | chr1 | NBPF16 | 140421390 | 0 |
| CEU | chr1 | NBPF16 | 140471390 | 0 |

### 3\_Introgression\_data

|     |      |        |           |   |
|-----|------|--------|-----------|---|
| CEU | chr1 | NBPF16 | 140521390 | 0 |
| CEU | chr1 | NBPF16 | 140571390 | 0 |
| CEU | chr1 | NBPF16 | 140621390 | 0 |
| CEU | chr1 | NBPF16 | 140671390 | 0 |
| CEU | chr1 | NBPF16 | 140721390 | 0 |
| CEU | chr1 | NBPF16 | 140771390 | 0 |
| CEU | chr1 | NBPF16 | 140821390 | 0 |
| CEU | chr1 | NBPF16 | 140871390 | 0 |
| CEU | chr1 | NBPF16 | 140921390 | 0 |
| CEU | chr1 | NBPF16 | 140971390 | 0 |
| CEU | chr1 | NBPF16 | 141021390 | 0 |
| CEU | chr1 | NBPF16 | 141071390 | 0 |
| CEU | chr1 | NBPF16 | 141121390 | 0 |
| CEU | chr1 | NBPF16 | 141171390 | 0 |
| CEU | chr1 | NBPF16 | 141221390 | 0 |
| CEU | chr1 | NBPF16 | 141271390 | 0 |
| CEU | chr1 | NBPF16 | 141321390 | 0 |
| CEU | chr1 | NBPF16 | 141371390 | 0 |
| CEU | chr1 | NBPF16 | 141421390 | 0 |
| CEU | chr1 | NBPF16 | 141471390 | 0 |
| CEU | chr1 | NBPF16 | 141521390 | 0 |
| CEU | chr1 | NBPF16 | 141571390 | 0 |
| CEU | chr1 | NBPF16 | 141621390 | 0 |
| CEU | chr1 | NBPF16 | 141671390 | 0 |
| CEU | chr1 | NBPF16 | 141721390 | 0 |
| CEU | chr1 | NBPF16 | 141771390 | 0 |
| CEU | chr1 | NBPF16 | 141821390 | 0 |
| CEU | chr1 | NBPF16 | 141871390 | 0 |
| CEU | chr1 | NBPF16 | 141921390 | 0 |
| CEU | chr1 | NBPF16 | 141971390 | 0 |
| CEU | chr1 | NBPF16 | 142021390 | 0 |
| CEU | chr1 | NBPF16 | 142071390 | 0 |
| CEU | chr1 | NBPF16 | 142121390 | 0 |
| CEU | chr1 | NBPF16 | 142171390 | 0 |
| CEU | chr1 | NBPF16 | 142221390 | 0 |
| CEU | chr1 | NBPF16 | 142271390 | 0 |
| CEU | chr1 | NBPF16 | 142321390 | 0 |
| CEU | chr1 | NBPF16 | 142371390 | 0 |
| CEU | chr1 | NBPF16 | 142421390 | 0 |
| CEU | chr1 | NBPF16 | 142471390 | 0 |
| CEU | chr1 | NBPF16 | 142521390 | 0 |
| CEU | chr1 | NBPF16 | 142571390 | 0 |
| CEU | chr1 | NBPF16 | 142621390 | 0 |
| CEU | chr1 | NBPF16 | 142671390 | 0 |
| CEU | chr1 | NBPF16 | 142721390 | 0 |
| CEU | chr1 | NBPF16 | 142771390 | 0 |
| CEU | chr1 | NBPF16 | 142821390 | 0 |
| CEU | chr1 | NBPF16 | 142871390 | 0 |
| CEU | chr1 | NBPF16 | 142921390 | 0 |

## 3\_Introgression\_data

|     |      |        |           |    |
|-----|------|--------|-----------|----|
| CEU | chr1 | NBPF16 | 142971390 | 0  |
| CEU | chr1 | NBPF16 | 143021390 | 0  |
| CEU | chr1 | NBPF16 | 143071390 | 1  |
| CEU | chr1 | NBPF16 | 143121390 | 34 |
| CEU | chr1 | NBPF16 | 143171390 | 64 |
| CEU | chr1 | NBPF16 | 143221390 | 57 |
| CEU | chr1 | NBPF16 | 143271390 | 44 |
| CEU | chr1 | NBPF16 | 143321390 | 18 |
| CEU | chr1 | NBPF16 | 143371390 | 0  |
| CEU | chr1 | NBPF16 | 143421390 | 0  |
| CEU | chr1 | NBPF16 | 143471390 | 0  |
| CEU | chr1 | NBPF16 | 143521390 | 0  |
| CEU | chr1 | NBPF16 | 143571390 | 0  |
| CEU | chr1 | NBPF16 | 143621390 | 0  |
| CEU | chr1 | NBPF16 | 143671390 | 0  |
| CEU | chr1 | NBPF16 | 143721390 | 0  |
| CEU | chr1 | NBPF16 | 143771390 | 0  |
| CEU | chr1 | NBPF16 | 143821390 | 0  |
| CEU | chr1 | NBPF16 | 143871390 | 0  |
| CEU | chr1 | NBPF16 | 143921390 | 0  |
| CEU | chr1 | NBPF16 | 143971390 | 0  |
| CEU | chr1 | NBPF16 | 144021390 | 0  |
| CEU | chr1 | NBPF16 | 144071390 | 0  |
| CEU | chr1 | NBPF16 | 144121390 | 0  |
| CEU | chr1 | NBPF16 | 144171390 | 0  |
| CEU | chr1 | NBPF16 | 144221390 | 0  |
| CEU | chr1 | NBPF16 | 144271390 | 0  |
| CEU | chr1 | NBPF16 | 144321390 | 0  |
| CEU | chr1 | NBPF16 | 144371390 | 0  |
| CEU | chr1 | NBPF16 | 144421390 | 0  |
| CEU | chr1 | NBPF16 | 144471390 | 0  |
| CEU | chr1 | NBPF16 | 144521390 | 0  |
| CEU | chr1 | NBPF16 | 144571390 | 0  |
| CEU | chr1 | NBPF16 | 144621390 | 0  |
| CEU | chr1 | NBPF16 | 144671390 | 0  |
| CEU | chr1 | NBPF16 | 144721390 | 0  |
| CEU | chr1 | NBPF16 | 144771390 | 0  |
| CEU | chr1 | NBPF16 | 144821390 | 0  |
| CEU | chr1 | NBPF16 | 144871390 | 0  |
| CEU | chr1 | NBPF16 | 144921390 | 0  |
| CEU | chr1 | NBPF16 | 144971390 | 0  |
| CEU | chr1 | NBPF16 | 145021390 | 0  |
| CEU | chr1 | NBPF16 | 145071390 | 0  |
| CEU | chr1 | NBPF16 | 145121390 | 0  |
| CEU | chr1 | NBPF16 | 145171390 | 0  |
| CEU | chr1 | NBPF16 | 145221390 | 0  |
| CEU | chr1 | NBPF16 | 145271390 | 0  |
| CEU | chr1 | NBPF16 | 145321390 | 0  |
| CEU | chr1 | NBPF16 | 145371390 | 0  |

### 3\_Introgression\_data

|     |      |        |           |     |
|-----|------|--------|-----------|-----|
| CEU | chr1 | NBPF16 | 145421390 | 0   |
| CEU | chr1 | NBPF16 | 145471390 | 0   |
| CEU | chr1 | NBPF16 | 145521390 | 0   |
| CEU | chr1 | NBPF16 | 145571390 | 0   |
| CEU | chr1 | NBPF16 | 145621390 | 0   |
| CEU | chr1 | NBPF16 | 145671390 | 0   |
| CEU | chr1 | NBPF16 | 145721390 | 0   |
| CEU | chr1 | NBPF16 | 145771390 | 0   |
| CEU | chr1 | NBPF16 | 145821390 | 0   |
| CEU | chr1 | NBPF16 | 145871390 | 0   |
| CEU | chr1 | NBPF16 | 145921390 | 0   |
| CEU | chr1 | NBPF16 | 145971390 | 0   |
| CEU | chr1 | NBPF16 | 146021390 | 0   |
| CEU | chr1 | NBPF16 | 146071390 | 0   |
| CEU | chr1 | NBPF16 | 146121390 | 0   |
| CEU | chr1 | NBPF16 | 146171390 | 0   |
| CEU | chr1 | NBPF16 | 146221390 | 0   |
| CEU | chr1 | NBPF16 | 146271390 | 0   |
| CEU | chr1 | NBPF16 | 146321390 | 0   |
| CEU | chr1 | NBPF16 | 146371390 | 0   |
| CEU | chr1 | NBPF16 | 146421390 | 0   |
| CEU | chr1 | NBPF16 | 146471390 | 20  |
| CEU | chr1 | NBPF16 | 146521390 | 42  |
| CEU | chr1 | NBPF16 | 146571390 | 49  |
| CEU | chr1 | NBPF16 | 146621390 | 42  |
| CEU | chr1 | NBPF16 | 146671390 | 38  |
| CEU | chr1 | NBPF16 | 146721390 | 44  |
| CEU | chr1 | NBPF16 | 146771390 | 34  |
| CEU | chr1 | NBPF16 | 146821390 | 31  |
| CEU | chr1 | NBPF16 | 146871390 | 47  |
| CEU | chr1 | NBPF16 | 146921390 | 51  |
| CEU | chr1 | NBPF16 | 146971390 | 32  |
| CEU | chr1 | NBPF16 | 147021390 | 21  |
| CEU | chr1 | NBPF16 | 147071390 | 29  |
| CEU | chr1 | NBPF16 | 147121390 | 30  |
| CEU | chr1 | NBPF16 | 147171390 | 44  |
| CEU | chr1 | NBPF16 | 147221390 | 76  |
| CEU | chr1 | NBPF16 | 147271390 | 127 |
| CEU | chr1 | NBPF16 | 147321390 | 105 |
| CEU | chr1 | NBPF16 | 147371390 | 35  |
| CEU | chr1 | NBPF16 | 147421390 | 14  |
| CEU | chr1 | NBPF16 | 147471390 | 1   |
| CEU | chr1 | NBPF16 | 147521390 | 0   |
| CEU | chr1 | NBPF16 | 147571390 | 0   |
| CEU | chr1 | NBPF16 | 147621390 | 0   |
| CEU | chr1 | NBPF16 | 147671390 | 0   |
| CEU | chr1 | NBPF16 | 147721390 | 0   |
| CEU | chr1 | NBPF16 | 147771390 | 0   |
| CEU | chr1 | NBPF16 | 147821390 | 0   |

### 3\_Introgression\_data

|     |      |        |           |    |
|-----|------|--------|-----------|----|
| CEU | chr1 | NBPF16 | 147871390 | 0  |
| CEU | chr1 | NBPF16 | 147921390 | 0  |
| CEU | chr1 | NBPF16 | 147971390 | 0  |
| CEU | chr1 | NBPF16 | 148021390 | 0  |
| CEU | chr1 | NBPF16 | 148071390 | 0  |
| CEU | chr1 | NBPF16 | 148121390 | 0  |
| CEU | chr1 | NBPF16 | 148171390 | 0  |
| CEU | chr1 | NBPF16 | 148221390 | 0  |
| CEU | chr1 | NBPF16 | 148271390 | 0  |
| CEU | chr1 | NBPF16 | 148321390 | 0  |
| CEU | chr1 | NBPF16 | 148371390 | 0  |
| CEU | chr1 | NBPF16 | 148421390 | 0  |
| CEU | chr1 | NBPF16 | 148471390 | 0  |
| CEU | chr1 | NBPF16 | 148521390 | 0  |
| CEU | chr1 | NBPF16 | 148571390 | 0  |
| CEU | chr1 | NBPF16 | 148621390 | 0  |
| CEU | chr1 | NBPF16 | 148671390 | 0  |
| CEU | chr1 | NBPF16 | 148721390 | 0  |
| CEU | chr1 | NBPF16 | 148771390 | 0  |
| CEU | chr1 | NBPF16 | 148821390 | 0  |
| CEU | chr1 | NBPF16 | 148871390 | 0  |
| CEU | chr1 | NBPF16 | 148921390 | 0  |
| CEU | chr1 | NBPF16 | 148971390 | 0  |
| CEU | chr1 | NBPF16 | 149021390 | 0  |
| CEU | chr1 | NBPF16 | 149071390 | 0  |
| CEU | chr1 | NBPF16 | 149121390 | 0  |
| CEU | chr1 | NBPF16 | 149171390 | 0  |
| CEU | chr1 | NBPF16 | 149221390 | 0  |
| CEU | chr1 | NBPF16 | 149271390 | 0  |
| CEU | chr1 | NBPF16 | 149321390 | 0  |
| CEU | chr1 | NBPF16 | 149371390 | 0  |
| CEU | chr1 | NPIP   | 39271070  | 0  |
| CEU | chr1 | NPIP   | 39321070  | 0  |
| CEU | chr1 | NPIP   | 39371070  | 11 |
| CEU | chr1 | NPIP   | 39421070  | 27 |
| CEU | chr1 | NPIP   | 39471070  | 32 |
| CEU | chr1 | NPIP   | 39521070  | 31 |
| CEU | chr1 | NPIP   | 39571070  | 25 |
| CEU | chr1 | NPIP   | 39621070  | 22 |
| CEU | chr1 | NPIP   | 39671070  | 26 |
| CEU | chr1 | NPIP   | 39721070  | 27 |
| CEU | chr1 | NPIP   | 39771070  | 23 |
| CEU | chr1 | NPIP   | 39821070  | 25 |
| CEU | chr1 | NPIP   | 39871070  | 24 |
| CEU | chr1 | NPIP   | 39921070  | 22 |
| CEU | chr1 | NPIP   | 39971070  | 21 |
| CEU | chr1 | NPIP   | 40021070  | 18 |
| CEU | chr1 | NPIP   | 40071070  | 21 |
| CEU | chr1 | NPIP   | 40121070  | 26 |

### 3\_Introgression\_data

|     |      |      |          |    |
|-----|------|------|----------|----|
| CEU | chr1 | NPIP | 40171070 | 31 |
| CEU | chr1 | NPIP | 40221070 | 62 |
| CEU | chr1 | NPIP | 40271070 | 71 |
| CEU | chr1 | NPIP | 40321070 | 33 |
| CEU | chr1 | NPIP | 40371070 | 12 |
| CEU | chr1 | NPIP | 40421070 | 4  |
| CEU | chr1 | NPIP | 40471070 | 0  |
| CEU | chr1 | NPIP | 40521070 | 0  |
| CEU | chr1 | NPIP | 40571070 | 0  |
| CEU | chr1 | NPIP | 40621070 | 0  |
| CEU | chr1 | NPIP | 40671070 | 0  |
| CEU | chr1 | NPIP | 40721070 | 0  |
| CEU | chr1 | NPIP | 40771070 | 0  |
| CEU | chr1 | NPIP | 40821070 | 0  |
| CEU | chr1 | NPIP | 40871070 | 0  |
| CEU | chr1 | NPIP | 40921070 | 0  |
| CEU | chr1 | NPIP | 40971070 | 0  |
| CEU | chr1 | NPIP | 41021070 | 0  |
| CEU | chr1 | NPIP | 41071070 | 0  |
| CEU | chr1 | NPIP | 41121070 | 0  |
| CEU | chr1 | NPIP | 41171070 | 0  |
| CEU | chr1 | NPIP | 41221070 | 0  |
| CEU | chr1 | NPIP | 41271070 | 0  |
| CEU | chr1 | NPIP | 41321070 | 0  |
| CEU | chr1 | NPIP | 41371070 | 0  |
| CEU | chr1 | NPIP | 41421070 | 0  |
| CEU | chr1 | NPIP | 41471070 | 0  |
| CEU | chr1 | NPIP | 41521070 | 0  |
| CEU | chr1 | NPIP | 41571070 | 0  |
| CEU | chr1 | NPIP | 41621070 | 0  |
| CEU | chr1 | NPIP | 41671070 | 0  |
| CEU | chr1 | NPIP | 41721070 | 0  |
| CEU | chr1 | NPIP | 41771070 | 0  |
| CEU | chr1 | NPIP | 41821070 | 0  |
| CEU | chr1 | NPIP | 41871070 | 0  |
| CEU | chr1 | NPIP | 41921070 | 0  |
| CEU | chr1 | NPIP | 41971070 | 0  |
| CEU | chr1 | NPIP | 42021070 | 0  |
| CEU | chr1 | NPIP | 42071070 | 1  |
| CEU | chr1 | NPIP | 42121070 | 21 |
| CEU | chr1 | NPIP | 42171070 | 41 |
| CEU | chr1 | NPIP | 42221070 | 42 |
| CEU | chr1 | NPIP | 42271070 | 46 |
| CEU | chr1 | NPIP | 42321070 | 45 |
| CEU | chr1 | NPIP | 42371070 | 40 |
| CEU | chr1 | NPIP | 42421070 | 34 |
| CEU | chr1 | NPIP | 42471070 | 26 |
| CEU | chr1 | NPIP | 42521070 | 12 |
| CEU | chr1 | NPIP | 42571070 | 0  |

### 3\_Introgression\_data

|     |      |      |          |   |
|-----|------|------|----------|---|
| CEU | chr1 | NPIP | 42621070 | 0 |
| CEU | chr1 | NPIP | 42671070 | 0 |
| CEU | chr1 | NPIP | 42721070 | 0 |
| CEU | chr1 | NPIP | 42771070 | 0 |
| CEU | chr1 | NPIP | 42821070 | 0 |
| CEU | chr1 | NPIP | 42871070 | 0 |
| CEU | chr1 | NPIP | 42921070 | 0 |
| CEU | chr1 | NPIP | 42971070 | 0 |
| CEU | chr1 | NPIP | 43021070 | 0 |
| CEU | chr1 | NPIP | 43071070 | 0 |
| CEU | chr1 | NPIP | 43121070 | 0 |
| CEU | chr1 | NPIP | 43171070 | 0 |
| CEU | chr1 | NPIP | 43221070 | 0 |
| CEU | chr1 | NPIP | 43271070 | 0 |
| CEU | chr1 | NPIP | 43321070 | 0 |
| CEU | chr1 | NPIP | 43371070 | 0 |
| CEU | chr1 | NPIP | 43421070 | 0 |
| CEU | chr1 | NPIP | 43471070 | 0 |
| CEU | chr1 | NPIP | 43521070 | 0 |
| CEU | chr1 | NPIP | 43571070 | 0 |
| CEU | chr1 | NPIP | 43621070 | 0 |
| CEU | chr1 | NPIP | 43671070 | 0 |
| CEU | chr1 | NPIP | 43721070 | 0 |
| CEU | chr1 | NPIP | 43771070 | 0 |
| CEU | chr1 | NPIP | 43821070 | 0 |
| CEU | chr1 | NPIP | 43871070 | 0 |
| CEU | chr1 | NPIP | 43921070 | 0 |
| CEU | chr1 | NPIP | 43971070 | 0 |
| CEU | chr1 | NPIP | 44021070 | 0 |
| CEU | chr1 | NPIP | 44071070 | 0 |
| CEU | chr1 | NPIP | 44121070 | 0 |
| CEU | chr1 | NPIP | 44171070 | 0 |
| CEU | chr1 | NPIP | 44221070 | 0 |
| CEU | chr1 | NPIP | 44271070 | 0 |
| CEU | chr1 | NPIP | 44321070 | 0 |
| CEU | chr1 | NPIP | 44371070 | 0 |
| CEU | chr1 | NPIP | 44421070 | 0 |
| CEU | chr1 | NPIP | 44471070 | 0 |
| CEU | chr1 | NPIP | 44521070 | 0 |
| CEU | chr1 | NPIP | 44571070 | 0 |
| CEU | chr1 | NPIP | 44621070 | 0 |
| CEU | chr1 | NPIP | 44671070 | 0 |
| CEU | chr1 | NPIP | 44721070 | 0 |
| CEU | chr1 | NPIP | 44771070 | 0 |
| CEU | chr1 | NPIP | 44821070 | 0 |
| CEU | chr1 | NPIP | 44871070 | 0 |
| CEU | chr1 | NPIP | 44921070 | 0 |
| CEU | chr1 | NPIP | 44971070 | 0 |
| CEU | chr1 | NPIP | 45021070 | 0 |



3\_Introgression\_data

|     |      |      |          |   |
|-----|------|------|----------|---|
| CEU | chr1 | NPIP | 45071070 | 0 |
| CEU | chr1 | NPIP | 45121070 | 0 |
| CEU | chr1 | NPIP | 45171070 | 0 |
| CEU | chr1 | NPIP | 45221070 | 0 |
| CEU | chr1 | NPIP | 45271070 | 0 |
| CEU | chr1 | NPIP | 45321070 | 0 |
| CEU | chr1 | NPIP | 45371070 | 0 |
| CEU | chr1 | NPIP | 45421070 | 0 |
| CEU | chr1 | NPIP | 45471070 | 0 |
| CEU | chr1 | NPIP | 45521070 | 0 |
| CEU | chr1 | NPIP | 45571070 | 0 |
| CEU | chr1 | NPIP | 45621070 | 0 |
| CEU | chr1 | NPIP | 45671070 | 0 |
| CEU | chr1 | NPIP | 45721070 | 0 |
| CEU | chr1 | NPIP | 45771070 | 0 |
| CEU | chr1 | NPIP | 45821070 | 0 |
| CEU | chr1 | NPIP | 45871070 | 0 |
| CEU | chr1 | NPIP | 45921070 | 0 |
| CEU | chr1 | NPIP | 45971070 | 0 |
| CEU | chr1 | NPIP | 46021070 | 0 |
| CEU | chr1 | NPIP | 46071070 | 0 |
| CEU | chr1 | NPIP | 46121070 | 0 |
| CEU | chr1 | NPIP | 46171070 | 0 |
| CEU | chr1 | NPIP | 46221070 | 0 |
| CEU | chr1 | NPIP | 46271070 | 0 |
| CEU | chr1 | NPIP | 46321070 | 0 |
| CEU | chr1 | NPIP | 46371070 | 0 |
| CEU | chr1 | NPIP | 46421070 | 0 |
| CEU | chr1 | NPIP | 46471070 | 0 |
| CEU | chr1 | NPIP | 46521070 | 0 |
| CEU | chr1 | NPIP | 46571070 | 0 |
| CEU | chr1 | NPIP | 46621070 | 0 |
| CEU | chr1 | NPIP | 46671070 | 0 |
| CEU | chr1 | NPIP | 46721070 | 0 |
| CEU | chr1 | NPIP | 46771070 | 0 |
| CEU | chr1 | NPIP | 46821070 | 0 |
| CEU | chr1 | NPIP | 46871070 | 0 |
| CEU | chr1 | NPIP | 46921070 | 0 |
| CEU | chr1 | NPIP | 46971070 | 0 |
| CEU | chr1 | NPIP | 47021070 | 0 |
| CEU | chr1 | NPIP | 47071070 | 0 |
| CEU | chr1 | NPIP | 47121070 | 0 |
| CEU | chr1 | NPIP | 47171070 | 0 |
| CEU | chr1 | NPIP | 47221070 | 0 |
| CEU | chr1 | NPIP | 47271070 | 0 |
| CEU | chr1 | NPIP | 47321070 | 0 |
| CEU | chr1 | NPIP | 47371070 | 0 |
| CEU | chr1 | NPIP | 47421070 | 0 |
| CEU | chr1 | NPIP | 47471070 | 0 |

### 3\_Introgression\_data

|     |       |      |          |    |
|-----|-------|------|----------|----|
| CEU | chr1  | NPIP | 47521070 | 0  |
| CEU | chr1  | NPIP | 47571070 | 0  |
| CEU | chr1  | NPIP | 47621070 | 0  |
| CEU | chr1  | NPIP | 47671070 | 4  |
| CEU | chr1  | NPIP | 47721070 | 20 |
| CEU | chr1  | NPIP | 47771070 | 37 |
| CEU | chr1  | NPIP | 47821070 | 35 |
| CEU | chr1  | NPIP | 47871070 | 27 |
| CEU | chr1  | NPIP | 47921070 | 31 |
| CEU | chr1  | NPIP | 47971070 | 58 |
| CEU | chr1  | NPIP | 48021070 | 40 |
| CEU | chr1  | NPIP | 48071070 | 0  |
| CEU | chr1  | NPIP | 48121070 | 0  |
| CEU | chr1  | NPIP | 48171070 | 0  |
| CEU | chr1  | NPIP | 48221070 | 0  |
| CEU | chr1  | NPIP | 48271070 | 0  |
| CEU | chr1  | NPIP | 48321070 | 0  |
| CEU | chr1  | NPIP | 48371070 | 0  |
| CEU | chr1  | NPIP | 48421070 | 0  |
| CEU | chr1  | NPIP | 48471070 | 0  |
| CEU | chr1  | NPIP | 48521070 | 0  |
| CEU | chr1  | NPIP | 48571070 | 0  |
| CEU | chr1  | NPIP | 48621070 | 0  |
| CEU | chr1  | NPIP | 48671070 | 0  |
| CEU | chr1  | NPIP | 48721070 | 0  |
| CEU | chr1  | NPIP | 48771070 | 0  |
| CEU | chr1  | NPIP | 48821070 | 0  |
| CEU | chr1  | NPIP | 48871070 | 0  |
| CEU | chr1  | NPIP | 48921070 | 0  |
| CEU | chr1  | NPIP | 48971070 | 0  |
| CEU | chr1  | NPIP | 49021070 | 0  |
| CEU | chr1  | NPIP | 49071070 | 0  |
| CEU | chr1  | NPIP | 49121070 | 0  |
| CEU | chr1  | NPIP | 49171070 | 0  |
| CEU | chr1  | NPIP | 49221070 | 0  |
| CEU | chr1  | NPIP | 49271070 | 0  |
| CEU | chr16 | NPIP | 6977263  | 57 |
| CEU | chr16 | NPIP | 7027263  | 0  |
| CEU | chr16 | NPIP | 7077263  | 0  |
| CEU | chr16 | NPIP | 7127263  | 0  |
| CEU | chr16 | NPIP | 7177263  | 0  |
| CEU | chr16 | NPIP | 7227263  | 0  |
| CEU | chr16 | NPIP | 7277263  | 0  |
| CEU | chr16 | NPIP | 7327263  | 0  |
| CEU | chr16 | NPIP | 7377263  | 0  |
| CEU | chr16 | NPIP | 7427263  | 0  |
| CEU | chr16 | NPIP | 7477263  | 0  |
| CEU | chr16 | NPIP | 7527263  | 0  |
| CEU | chr16 | NPIP | 7577263  | 0  |

3\_Introgression\_data

|     |       |      |          |     |
|-----|-------|------|----------|-----|
| CEU | chr16 | NPIP | 7627263  | 0   |
| CEU | chr16 | NPIP | 7677263  | 0   |
| CEU | chr16 | NPIP | 7727263  | 11  |
| CEU | chr16 | NPIP | 7777263  | 80  |
| CEU | chr16 | NPIP | 7827263  | 87  |
| CEU | chr16 | NPIP | 7877263  | 58  |
| CEU | chr16 | NPIP | 7927263  | 40  |
| CEU | chr16 | NPIP | 7977263  | 0   |
| CEU | chr16 | NPIP | 8027263  | 0   |
| CEU | chr16 | NPIP | 8077263  | 0   |
| CEU | chr16 | NPIP | 8127263  | 0   |
| CEU | chr16 | NPIP | 8177263  | 0   |
| CEU | chr16 | NPIP | 8227263  | 0   |
| CEU | chr16 | NPIP | 8277263  | 49  |
| CEU | chr16 | NPIP | 8327263  | 106 |
| CEU | chr16 | NPIP | 8377263  | 100 |
| CEU | chr16 | NPIP | 8427263  | 62  |
| CEU | chr16 | NPIP | 8477263  | 19  |
| CEU | chr16 | NPIP | 8527263  | 0   |
| CEU | chr16 | NPIP | 8577263  | 0   |
| CEU | chr16 | NPIP | 8627263  | 0   |
| CEU | chr16 | NPIP | 8677263  | 0   |
| CEU | chr16 | NPIP | 8727263  | 9   |
| CEU | chr16 | NPIP | 8777263  | 20  |
| CEU | chr16 | NPIP | 8827263  | 31  |
| CEU | chr16 | NPIP | 8877263  | 34  |
| CEU | chr16 | NPIP | 8927263  | 49  |
| CEU | chr16 | NPIP | 8977263  | 54  |
| CEU | chr16 | NPIP | 9027263  | 42  |
| CEU | chr16 | NPIP | 9077263  | 54  |
| CEU | chr16 | NPIP | 9127263  | 55  |
| CEU | chr16 | NPIP | 9177263  | 24  |
| CEU | chr16 | NPIP | 9227263  | 0   |
| CEU | chr16 | NPIP | 9277263  | 0   |
| CEU | chr16 | NPIP | 9327263  | 0   |
| CEU | chr16 | NPIP | 9377263  | 0   |
| CEU | chr16 | NPIP | 9427263  | 0   |
| CEU | chr16 | NPIP | 9477263  | 0   |
| CEU | chr16 | NPIP | 9527263  | 0   |
| CEU | chr16 | NPIP | 9577263  | 0   |
| CEU | chr16 | NPIP | 9627263  | 9   |
| CEU | chr16 | NPIP | 9677263  | 44  |
| CEU | chr16 | NPIP | 9727263  | 56  |
| CEU | chr16 | NPIP | 9777263  | 34  |
| CEU | chr16 | NPIP | 9827263  | 13  |
| CEU | chr16 | NPIP | 9877263  | 0   |
| CEU | chr16 | NPIP | 9927263  | 0   |
| CEU | chr16 | NPIP | 9977263  | 0   |
| CEU | chr16 | NPIP | 10027263 | 0   |

### 3\_Introgression\_data

|     |       |      |          |   |
|-----|-------|------|----------|---|
| CEU | chr16 | NPIP | 10077263 | 0 |
| CEU | chr16 | NPIP | 10127263 | 0 |
| CEU | chr16 | NPIP | 10177263 | 0 |
| CEU | chr16 | NPIP | 10227263 | 0 |
| CEU | chr16 | NPIP | 10277263 | 0 |
| CEU | chr16 | NPIP | 10327263 | 0 |
| CEU | chr16 | NPIP | 10377263 | 0 |
| CEU | chr16 | NPIP | 10427263 | 0 |
| CEU | chr16 | NPIP | 10477263 | 0 |
| CEU | chr16 | NPIP | 10527263 | 0 |
| CEU | chr16 | NPIP | 10577263 | 0 |
| CEU | chr16 | NPIP | 10627263 | 0 |
| CEU | chr16 | NPIP | 10677263 | 0 |
| CEU | chr16 | NPIP | 10727263 | 0 |
| CEU | chr16 | NPIP | 10777263 | 0 |
| CEU | chr16 | NPIP | 10827263 | 0 |
| CEU | chr16 | NPIP | 10877263 | 0 |
| CEU | chr16 | NPIP | 10927263 | 0 |
| CEU | chr16 | NPIP | 10977263 | 0 |
| CEU | chr16 | NPIP | 11027263 | 0 |
| CEU | chr16 | NPIP | 11077263 | 0 |
| CEU | chr16 | NPIP | 11127263 | 0 |
| CEU | chr16 | NPIP | 11177263 | 0 |
| CEU | chr16 | NPIP | 11227263 | 0 |
| CEU | chr16 | NPIP | 11277263 | 0 |
| CEU | chr16 | NPIP | 11327263 | 0 |
| CEU | chr16 | NPIP | 11377263 | 0 |
| CEU | chr16 | NPIP | 11427263 | 0 |
| CEU | chr16 | NPIP | 11477263 | 0 |
| CEU | chr16 | NPIP | 11527263 | 0 |
| CEU | chr16 | NPIP | 11577263 | 0 |
| CEU | chr16 | NPIP | 11627263 | 0 |
| CEU | chr16 | NPIP | 11677263 | 0 |
| CEU | chr16 | NPIP | 11727263 | 0 |
| CEU | chr16 | NPIP | 11777263 | 0 |
| CEU | chr16 | NPIP | 11827263 | 0 |
| CEU | chr16 | NPIP | 11877263 | 0 |
| CEU | chr16 | NPIP | 11927263 | 0 |
| CEU | chr16 | NPIP | 11977263 | 0 |
| CEU | chr16 | NPIP | 12027263 | 0 |
| CEU | chr16 | NPIP | 12077263 | 0 |
| CEU | chr16 | NPIP | 12127263 | 0 |
| CEU | chr16 | NPIP | 12177263 | 0 |
| CEU | chr16 | NPIP | 12227263 | 0 |
| CEU | chr16 | NPIP | 12277263 | 0 |
| CEU | chr16 | NPIP | 12327263 | 0 |
| CEU | chr16 | NPIP | 12377263 | 0 |
| CEU | chr16 | NPIP | 12427263 | 0 |
| CEU | chr16 | NPIP | 12477263 | 0 |

### 3\_Introgression\_data

|     |       |      |          |   |
|-----|-------|------|----------|---|
| CEU | chr16 | NPIP | 12527263 | 0 |
| CEU | chr16 | NPIP | 12577263 | 0 |
| CEU | chr16 | NPIP | 12627263 | 0 |
| CEU | chr16 | NPIP | 12677263 | 0 |
| CEU | chr16 | NPIP | 12727263 | 0 |
| CEU | chr16 | NPIP | 12777263 | 0 |
| CEU | chr16 | NPIP | 12827263 | 0 |
| CEU | chr16 | NPIP | 12877263 | 0 |
| CEU | chr16 | NPIP | 12927263 | 0 |
| CEU | chr16 | NPIP | 12977263 | 0 |
| CEU | chr16 | NPIP | 13027263 | 0 |
| CEU | chr16 | NPIP | 13077263 | 0 |
| CEU | chr16 | NPIP | 13127263 | 0 |
| CEU | chr16 | NPIP | 13177263 | 0 |
| CEU | chr16 | NPIP | 13227263 | 0 |
| CEU | chr16 | NPIP | 13277263 | 0 |
| CEU | chr16 | NPIP | 13327263 | 0 |
| CEU | chr16 | NPIP | 13377263 | 0 |
| CEU | chr16 | NPIP | 13427263 | 0 |
| CEU | chr16 | NPIP | 13477263 | 0 |
| CEU | chr16 | NPIP | 13527263 | 0 |
| CEU | chr16 | NPIP | 13577263 | 0 |
| CEU | chr16 | NPIP | 13627263 | 0 |
| CEU | chr16 | NPIP | 13677263 | 0 |
| CEU | chr16 | NPIP | 13727263 | 0 |
| CEU | chr16 | NPIP | 13777263 | 0 |
| CEU | chr16 | NPIP | 13827263 | 0 |
| CEU | chr16 | NPIP | 13877263 | 0 |
| CEU | chr16 | NPIP | 13927263 | 0 |
| CEU | chr16 | NPIP | 13977263 | 0 |
| CEU | chr16 | NPIP | 14027263 | 0 |
| CEU | chr16 | NPIP | 14077263 | 0 |
| CEU | chr16 | NPIP | 14127263 | 0 |
| CEU | chr16 | NPIP | 14177263 | 0 |
| CEU | chr16 | NPIP | 14227263 | 0 |
| CEU | chr16 | NPIP | 14277263 | 0 |
| CEU | chr16 | NPIP | 14327263 | 0 |
| CEU | chr16 | NPIP | 14377263 | 0 |
| CEU | chr16 | NPIP | 14427263 | 0 |
| CEU | chr16 | NPIP | 14477263 | 0 |
| CEU | chr16 | NPIP | 14527263 | 0 |
| CEU | chr16 | NPIP | 14577263 | 0 |
| CEU | chr16 | NPIP | 14627263 | 0 |
| CEU | chr16 | NPIP | 14677263 | 0 |
| CEU | chr16 | NPIP | 14727263 | 0 |
| CEU | chr16 | NPIP | 14777263 | 0 |
| CEU | chr16 | NPIP | 14827263 | 0 |
| CEU | chr16 | NPIP | 14877263 | 0 |
| CEU | chr16 | NPIP | 14927263 | 0 |

3\_Introgression\_data

|     |       |      |          |    |
|-----|-------|------|----------|----|
| CEU | chr16 | NPIP | 14977263 | 0  |
| CEU | chr16 | NPIP | 15027263 | 0  |
| CEU | chr16 | NPIP | 15077263 | 0  |
| CEU | chr16 | NPIP | 15127263 | 0  |
| CEU | chr16 | NPIP | 15177263 | 0  |
| CEU | chr16 | NPIP | 15227263 | 0  |
| CEU | chr16 | NPIP | 15277263 | 0  |
| CEU | chr16 | NPIP | 15327263 | 0  |
| CEU | chr16 | NPIP | 15377263 | 0  |
| CEU | chr16 | NPIP | 15427263 | 0  |
| CEU | chr16 | NPIP | 15477263 | 0  |
| CEU | chr16 | NPIP | 15527263 | 0  |
| CEU | chr16 | NPIP | 15577263 | 0  |
| CEU | chr16 | NPIP | 15627263 | 0  |
| CEU | chr16 | NPIP | 15677263 | 0  |
| CEU | chr16 | NPIP | 15727263 | 0  |
| CEU | chr16 | NPIP | 15777263 | 0  |
| CEU | chr16 | NPIP | 15827263 | 0  |
| CEU | chr16 | NPIP | 15877263 | 0  |
| CEU | chr16 | NPIP | 15927263 | 0  |
| CEU | chr16 | NPIP | 15977263 | 0  |
| CEU | chr16 | NPIP | 16027263 | 0  |
| CEU | chr16 | NPIP | 16077263 | 0  |
| CEU | chr16 | NPIP | 16127263 | 0  |
| CEU | chr16 | NPIP | 16177263 | 15 |
| CEU | chr16 | NPIP | 16227263 | 41 |
| CEU | chr16 | NPIP | 16277263 | 26 |
| CEU | chr16 | NPIP | 16327263 | 0  |
| CEU | chr16 | NPIP | 16377263 | 0  |
| CEU | chr16 | NPIP | 16427263 | 0  |
| CEU | chr16 | NPIP | 16477263 | 0  |
| CEU | chr16 | NPIP | 16527263 | 0  |
| CEU | chr16 | NPIP | 16577263 | 0  |
| CEU | chr16 | NPIP | 16627263 | 0  |
| CEU | chr16 | NPIP | 16677263 | 0  |
| CEU | chr16 | NPIP | 16727263 | 0  |
| CEU | chr16 | NPIP | 16777263 | 0  |
| CEU | chr16 | NPIP | 16827263 | 0  |
| CEU | chr16 | NPIP | 16877263 | 0  |
| CEU | chr16 | NPIP | 9753411  | 58 |
| CEU | chr16 | NPIP | 9803411  | 24 |
| CEU | chr16 | NPIP | 9853411  | 0  |
| CEU | chr16 | NPIP | 9903411  | 0  |
| CEU | chr16 | NPIP | 9953411  | 0  |
| CEU | chr16 | NPIP | 10003411 | 0  |
| CEU | chr16 | NPIP | 10053411 | 0  |
| CEU | chr16 | NPIP | 10103411 | 0  |
| CEU | chr16 | NPIP | 10153411 | 0  |
| CEU | chr16 | NPIP | 10203411 | 0  |

## 3\_Introgression\_data

|     |       |      |          |   |
|-----|-------|------|----------|---|
| CEU | chr16 | NPIP | 10253411 | 0 |
| CEU | chr16 | NPIP | 10303411 | 0 |
| CEU | chr16 | NPIP | 10353411 | 0 |
| CEU | chr16 | NPIP | 10403411 | 0 |
| CEU | chr16 | NPIP | 10453411 | 0 |
| CEU | chr16 | NPIP | 10503411 | 0 |
| CEU | chr16 | NPIP | 10553411 | 0 |
| CEU | chr16 | NPIP | 10603411 | 0 |
| CEU | chr16 | NPIP | 10653411 | 0 |
| CEU | chr16 | NPIP | 10703411 | 0 |
| CEU | chr16 | NPIP | 10753411 | 0 |
| CEU | chr16 | NPIP | 10803411 | 0 |
| CEU | chr16 | NPIP | 10853411 | 0 |
| CEU | chr16 | NPIP | 10903411 | 0 |
| CEU | chr16 | NPIP | 10953411 | 0 |
| CEU | chr16 | NPIP | 11003411 | 0 |
| CEU | chr16 | NPIP | 11053411 | 0 |
| CEU | chr16 | NPIP | 11103411 | 0 |
| CEU | chr16 | NPIP | 11153411 | 0 |
| CEU | chr16 | NPIP | 11203411 | 0 |
| CEU | chr16 | NPIP | 11253411 | 0 |
| CEU | chr16 | NPIP | 11303411 | 0 |
| CEU | chr16 | NPIP | 11353411 | 0 |
| CEU | chr16 | NPIP | 11403411 | 0 |
| CEU | chr16 | NPIP | 11453411 | 0 |
| CEU | chr16 | NPIP | 11503411 | 0 |
| CEU | chr16 | NPIP | 11553411 | 0 |
| CEU | chr16 | NPIP | 11603411 | 0 |
| CEU | chr16 | NPIP | 11653411 | 0 |
| CEU | chr16 | NPIP | 11703411 | 0 |
| CEU | chr16 | NPIP | 11753411 | 0 |
| CEU | chr16 | NPIP | 11803411 | 0 |
| CEU | chr16 | NPIP | 11853411 | 0 |
| CEU | chr16 | NPIP | 11903411 | 0 |
| CEU | chr16 | NPIP | 11953411 | 0 |
| CEU | chr16 | NPIP | 12003411 | 0 |
| CEU | chr16 | NPIP | 12053411 | 0 |
| CEU | chr16 | NPIP | 12103411 | 0 |
| CEU | chr16 | NPIP | 12153411 | 0 |
| CEU | chr16 | NPIP | 12203411 | 0 |
| CEU | chr16 | NPIP | 12253411 | 0 |
| CEU | chr16 | NPIP | 12303411 | 0 |
| CEU | chr16 | NPIP | 12353411 | 0 |
| CEU | chr16 | NPIP | 12403411 | 0 |
| CEU | chr16 | NPIP | 12453411 | 0 |
| CEU | chr16 | NPIP | 12503411 | 0 |
| CEU | chr16 | NPIP | 12553411 | 0 |
| CEU | chr16 | NPIP | 12603411 | 0 |
| CEU | chr16 | NPIP | 12653411 | 0 |

## 3\_Introgression\_data

|     |       |      |          |   |
|-----|-------|------|----------|---|
| CEU | chr16 | NPIP | 12703411 | 0 |
| CEU | chr16 | NPIP | 12753411 | 0 |
| CEU | chr16 | NPIP | 12803411 | 0 |
| CEU | chr16 | NPIP | 12853411 | 0 |
| CEU | chr16 | NPIP | 12903411 | 0 |
| CEU | chr16 | NPIP | 12953411 | 0 |
| CEU | chr16 | NPIP | 13003411 | 0 |
| CEU | chr16 | NPIP | 13053411 | 0 |
| CEU | chr16 | NPIP | 13103411 | 0 |
| CEU | chr16 | NPIP | 13153411 | 0 |
| CEU | chr16 | NPIP | 13203411 | 0 |
| CEU | chr16 | NPIP | 13253411 | 0 |
| CEU | chr16 | NPIP | 13303411 | 0 |
| CEU | chr16 | NPIP | 13353411 | 0 |
| CEU | chr16 | NPIP | 13403411 | 0 |
| CEU | chr16 | NPIP | 13453411 | 0 |
| CEU | chr16 | NPIP | 13503411 | 0 |
| CEU | chr16 | NPIP | 13553411 | 0 |
| CEU | chr16 | NPIP | 13603411 | 0 |
| CEU | chr16 | NPIP | 13653411 | 0 |
| CEU | chr16 | NPIP | 13703411 | 0 |
| CEU | chr16 | NPIP | 13753411 | 0 |
| CEU | chr16 | NPIP | 13803411 | 0 |
| CEU | chr16 | NPIP | 13853411 | 0 |
| CEU | chr16 | NPIP | 13903411 | 0 |
| CEU | chr16 | NPIP | 13953411 | 0 |
| CEU | chr16 | NPIP | 14003411 | 0 |
| CEU | chr16 | NPIP | 14053411 | 0 |
| CEU | chr16 | NPIP | 14103411 | 0 |
| CEU | chr16 | NPIP | 14153411 | 0 |
| CEU | chr16 | NPIP | 14203411 | 0 |
| CEU | chr16 | NPIP | 14253411 | 0 |
| CEU | chr16 | NPIP | 14303411 | 0 |
| CEU | chr16 | NPIP | 14353411 | 0 |
| CEU | chr16 | NPIP | 14403411 | 0 |
| CEU | chr16 | NPIP | 14453411 | 0 |
| CEU | chr16 | NPIP | 14503411 | 0 |
| CEU | chr16 | NPIP | 14553411 | 0 |
| CEU | chr16 | NPIP | 14603411 | 0 |
| CEU | chr16 | NPIP | 14653411 | 0 |
| CEU | chr16 | NPIP | 14703411 | 0 |
| CEU | chr16 | NPIP | 14753411 | 0 |
| CEU | chr16 | NPIP | 14803411 | 0 |
| CEU | chr16 | NPIP | 14853411 | 0 |
| CEU | chr16 | NPIP | 14903411 | 0 |
| CEU | chr16 | NPIP | 14953411 | 0 |
| CEU | chr16 | NPIP | 15003411 | 0 |
| CEU | chr16 | NPIP | 15053411 | 0 |
| CEU | chr16 | NPIP | 15103411 | 0 |



### 3\_Introgression\_data

|     |       |      |          |    |
|-----|-------|------|----------|----|
| CEU | chr16 | NPIP | 15153411 | 0  |
| CEU | chr16 | NPIP | 15203411 | 0  |
| CEU | chr16 | NPIP | 15253411 | 0  |
| CEU | chr16 | NPIP | 15303411 | 0  |
| CEU | chr16 | NPIP | 15353411 | 0  |
| CEU | chr16 | NPIP | 15403411 | 0  |
| CEU | chr16 | NPIP | 15453411 | 0  |
| CEU | chr16 | NPIP | 15503411 | 0  |
| CEU | chr16 | NPIP | 15553411 | 0  |
| CEU | chr16 | NPIP | 15603411 | 0  |
| CEU | chr16 | NPIP | 15653411 | 0  |
| CEU | chr16 | NPIP | 15703411 | 0  |
| CEU | chr16 | NPIP | 15753411 | 0  |
| CEU | chr16 | NPIP | 15803411 | 0  |
| CEU | chr16 | NPIP | 15853411 | 0  |
| CEU | chr16 | NPIP | 15903411 | 0  |
| CEU | chr16 | NPIP | 15953411 | 0  |
| CEU | chr16 | NPIP | 16003411 | 0  |
| CEU | chr16 | NPIP | 16053411 | 0  |
| CEU | chr16 | NPIP | 16103411 | 0  |
| CEU | chr16 | NPIP | 16153411 | 1  |
| CEU | chr16 | NPIP | 16203411 | 28 |
| CEU | chr16 | NPIP | 16253411 | 40 |
| CEU | chr16 | NPIP | 16303411 | 13 |
| CEU | chr16 | NPIP | 16353411 | 0  |
| CEU | chr16 | NPIP | 16403411 | 0  |
| CEU | chr16 | NPIP | 16453411 | 0  |
| CEU | chr16 | NPIP | 16503411 | 0  |
| CEU | chr16 | NPIP | 16553411 | 0  |
| CEU | chr16 | NPIP | 16603411 | 0  |
| CEU | chr16 | NPIP | 16653411 | 0  |
| CEU | chr16 | NPIP | 16703411 | 0  |
| CEU | chr16 | NPIP | 16753411 | 0  |
| CEU | chr16 | NPIP | 16803411 | 0  |
| CEU | chr16 | NPIP | 16853411 | 0  |
| CEU | chr16 | NPIP | 16903411 | 0  |
| CEU | chr16 | NPIP | 16953411 | 0  |
| CEU | chr16 | NPIP | 17003411 | 0  |
| CEU | chr16 | NPIP | 17053411 | 0  |
| CEU | chr16 | NPIP | 17103411 | 0  |
| CEU | chr16 | NPIP | 17153411 | 0  |
| CEU | chr16 | NPIP | 17203411 | 0  |
| CEU | chr16 | NPIP | 17253411 | 0  |
| CEU | chr16 | NPIP | 17303411 | 52 |
| CEU | chr16 | NPIP | 17353411 | 70 |
| CEU | chr16 | NPIP | 17403411 | 19 |
| CEU | chr16 | NPIP | 17453411 | 1  |
| CEU | chr16 | NPIP | 17503411 | 0  |
| CEU | chr16 | NPIP | 17553411 | 0  |

## 3\_Introgression\_data

|     |       |      |          |   |
|-----|-------|------|----------|---|
| CEU | chr16 | NPIP | 17603411 | 0 |
| CEU | chr16 | NPIP | 17653411 | 0 |
| CEU | chr16 | NPIP | 17703411 | 0 |
| CEU | chr16 | NPIP | 17753411 | 0 |
| CEU | chr16 | NPIP | 17803411 | 0 |
| CEU | chr16 | NPIP | 17853411 | 0 |
| CEU | chr16 | NPIP | 17903411 | 0 |
| CEU | chr16 | NPIP | 17953411 | 0 |
| CEU | chr16 | NPIP | 18003411 | 0 |
| CEU | chr16 | NPIP | 18053411 | 0 |
| CEU | chr16 | NPIP | 18103411 | 0 |
| CEU | chr16 | NPIP | 18153411 | 0 |
| CEU | chr16 | NPIP | 18203411 | 0 |
| CEU | chr16 | NPIP | 18253411 | 0 |
| CEU | chr16 | NPIP | 18303411 | 0 |
| CEU | chr16 | NPIP | 18353411 | 0 |
| CEU | chr16 | NPIP | 18403411 | 0 |
| CEU | chr16 | NPIP | 18453411 | 0 |
| CEU | chr16 | NPIP | 18503411 | 0 |
| CEU | chr16 | NPIP | 18553411 | 0 |
| CEU | chr16 | NPIP | 18603411 | 0 |
| CEU | chr16 | NPIP | 18653411 | 0 |
| CEU | chr16 | NPIP | 18703411 | 0 |
| CEU | chr16 | NPIP | 18753411 | 0 |
| CEU | chr16 | NPIP | 18803411 | 0 |
| CEU | chr16 | NPIP | 18853411 | 0 |
| CEU | chr16 | NPIP | 18903411 | 0 |
| CEU | chr16 | NPIP | 18953411 | 0 |
| CEU | chr16 | NPIP | 19003411 | 0 |
| CEU | chr16 | NPIP | 19053411 | 0 |
| CEU | chr16 | NPIP | 19103411 | 0 |
| CEU | chr16 | NPIP | 19153411 | 0 |
| CEU | chr16 | NPIP | 19203411 | 0 |
| CEU | chr16 | NPIP | 19253411 | 0 |
| CEU | chr16 | NPIP | 19303411 | 0 |
| CEU | chr16 | NPIP | 19353411 | 0 |
| CEU | chr16 | NPIP | 19403411 | 0 |
| CEU | chr16 | NPIP | 19453411 | 0 |
| CEU | chr16 | NPIP | 19503411 | 0 |
| CEU | chr16 | NPIP | 19553411 | 0 |
| CEU | chr16 | NPIP | 19603411 | 0 |
| CEU | chr16 | NPIP | 19653411 | 0 |
| CEU | chr16 | NPIP | 13367919 | 0 |
| CEU | chr16 | NPIP | 13417919 | 0 |
| CEU | chr16 | NPIP | 13467919 | 0 |
| CEU | chr16 | NPIP | 13517919 | 0 |
| CEU | chr16 | NPIP | 13567919 | 0 |
| CEU | chr16 | NPIP | 13617919 | 0 |
| CEU | chr16 | NPIP | 13667919 | 0 |

## 3\_Introgression\_data

|     |       |      |          |   |
|-----|-------|------|----------|---|
| CEU | chr16 | NPIP | 13717919 | 0 |
| CEU | chr16 | NPIP | 13767919 | 0 |
| CEU | chr16 | NPIP | 13817919 | 0 |
| CEU | chr16 | NPIP | 13867919 | 0 |
| CEU | chr16 | NPIP | 13917919 | 0 |
| CEU | chr16 | NPIP | 13967919 | 0 |
| CEU | chr16 | NPIP | 14017919 | 0 |
| CEU | chr16 | NPIP | 14067919 | 0 |
| CEU | chr16 | NPIP | 14117919 | 0 |
| CEU | chr16 | NPIP | 14167919 | 0 |
| CEU | chr16 | NPIP | 14217919 | 0 |
| CEU | chr16 | NPIP | 14267919 | 0 |
| CEU | chr16 | NPIP | 14317919 | 0 |
| CEU | chr16 | NPIP | 14367919 | 0 |
| CEU | chr16 | NPIP | 14417919 | 0 |
| CEU | chr16 | NPIP | 14467919 | 0 |
| CEU | chr16 | NPIP | 14517919 | 0 |
| CEU | chr16 | NPIP | 14567919 | 0 |
| CEU | chr16 | NPIP | 14617919 | 0 |
| CEU | chr16 | NPIP | 14667919 | 0 |
| CEU | chr16 | NPIP | 14717919 | 0 |
| CEU | chr16 | NPIP | 14767919 | 0 |
| CEU | chr16 | NPIP | 14817919 | 0 |
| CEU | chr16 | NPIP | 14867919 | 0 |
| CEU | chr16 | NPIP | 14917919 | 0 |
| CEU | chr16 | NPIP | 14967919 | 0 |
| CEU | chr16 | NPIP | 15017919 | 0 |
| CEU | chr16 | NPIP | 15067919 | 0 |
| CEU | chr16 | NPIP | 15117919 | 0 |
| CEU | chr16 | NPIP | 15167919 | 0 |
| CEU | chr16 | NPIP | 15217919 | 0 |
| CEU | chr16 | NPIP | 15267919 | 0 |
| CEU | chr16 | NPIP | 15317919 | 0 |
| CEU | chr16 | NPIP | 15367919 | 0 |
| CEU | chr16 | NPIP | 15417919 | 0 |
| CEU | chr16 | NPIP | 15467919 | 0 |
| CEU | chr16 | NPIP | 15517919 | 0 |
| CEU | chr16 | NPIP | 15567919 | 0 |
| CEU | chr16 | NPIP | 15617919 | 0 |
| CEU | chr16 | NPIP | 15667919 | 0 |
| CEU | chr16 | NPIP | 15717919 | 0 |
| CEU | chr16 | NPIP | 15767919 | 0 |
| CEU | chr16 | NPIP | 15817919 | 0 |
| CEU | chr16 | NPIP | 15867919 | 0 |
| CEU | chr16 | NPIP | 15917919 | 0 |
| CEU | chr16 | NPIP | 15967919 | 0 |
| CEU | chr16 | NPIP | 16017919 | 0 |
| CEU | chr16 | NPIP | 16067919 | 0 |
| CEU | chr16 | NPIP | 16117919 | 0 |

### 3\_Introgression\_data

|     |       |      |          |    |
|-----|-------|------|----------|----|
| CEU | chr16 | NPIP | 16167919 | 2  |
| CEU | chr16 | NPIP | 16217919 | 38 |
| CEU | chr16 | NPIP | 16267919 | 39 |
| CEU | chr16 | NPIP | 16317919 | 3  |
| CEU | chr16 | NPIP | 16367919 | 0  |
| CEU | chr16 | NPIP | 16417919 | 0  |
| CEU | chr16 | NPIP | 16467919 | 0  |
| CEU | chr16 | NPIP | 16517919 | 0  |
| CEU | chr16 | NPIP | 16567919 | 0  |
| CEU | chr16 | NPIP | 16617919 | 0  |
| CEU | chr16 | NPIP | 16667919 | 0  |
| CEU | chr16 | NPIP | 16717919 | 0  |
| CEU | chr16 | NPIP | 16767919 | 0  |
| CEU | chr16 | NPIP | 16817919 | 0  |
| CEU | chr16 | NPIP | 16867919 | 0  |
| CEU | chr16 | NPIP | 16917919 | 0  |
| CEU | chr16 | NPIP | 16967919 | 0  |
| CEU | chr16 | NPIP | 17017919 | 0  |
| CEU | chr16 | NPIP | 17067919 | 0  |
| CEU | chr16 | NPIP | 17117919 | 0  |
| CEU | chr16 | NPIP | 17167919 | 0  |
| CEU | chr16 | NPIP | 17217919 | 0  |
| CEU | chr16 | NPIP | 17267919 | 7  |
| CEU | chr16 | NPIP | 17317919 | 60 |
| CEU | chr16 | NPIP | 17367919 | 64 |
| CEU | chr16 | NPIP | 17417919 | 11 |
| CEU | chr16 | NPIP | 17467919 | 0  |
| CEU | chr16 | NPIP | 17517919 | 0  |
| CEU | chr16 | NPIP | 17567919 | 0  |
| CEU | chr16 | NPIP | 17617919 | 0  |
| CEU | chr16 | NPIP | 17667919 | 0  |
| CEU | chr16 | NPIP | 17717919 | 0  |
| CEU | chr16 | NPIP | 17767919 | 0  |
| CEU | chr16 | NPIP | 17817919 | 0  |
| CEU | chr16 | NPIP | 17867919 | 0  |
| CEU | chr16 | NPIP | 17917919 | 0  |
| CEU | chr16 | NPIP | 17967919 | 0  |
| CEU | chr16 | NPIP | 18017919 | 0  |
| CEU | chr16 | NPIP | 18067919 | 0  |
| CEU | chr16 | NPIP | 18117919 | 0  |
| CEU | chr16 | NPIP | 18167919 | 0  |
| CEU | chr16 | NPIP | 18217919 | 0  |
| CEU | chr16 | NPIP | 18267919 | 0  |
| CEU | chr16 | NPIP | 18317919 | 0  |
| CEU | chr16 | NPIP | 18367919 | 0  |
| CEU | chr16 | NPIP | 18417919 | 0  |
| CEU | chr16 | NPIP | 18467919 | 0  |
| CEU | chr16 | NPIP | 18517919 | 0  |
| CEU | chr16 | NPIP | 18567919 | 0  |

## 3\_Introgression\_data

|     |       |      |          |   |
|-----|-------|------|----------|---|
| CEU | chr16 | NPIP | 18617919 | 0 |
| CEU | chr16 | NPIP | 18667919 | 0 |
| CEU | chr16 | NPIP | 18717919 | 0 |
| CEU | chr16 | NPIP | 18767919 | 0 |
| CEU | chr16 | NPIP | 18817919 | 0 |
| CEU | chr16 | NPIP | 18867919 | 0 |
| CEU | chr16 | NPIP | 18917919 | 0 |
| CEU | chr16 | NPIP | 18967919 | 0 |
| CEU | chr16 | NPIP | 19017919 | 0 |
| CEU | chr16 | NPIP | 19067919 | 0 |
| CEU | chr16 | NPIP | 19117919 | 0 |
| CEU | chr16 | NPIP | 19167919 | 0 |
| CEU | chr16 | NPIP | 19217919 | 0 |
| CEU | chr16 | NPIP | 19267919 | 0 |
| CEU | chr16 | NPIP | 19317919 | 0 |
| CEU | chr16 | NPIP | 19367919 | 0 |
| CEU | chr16 | NPIP | 19417919 | 0 |
| CEU | chr16 | NPIP | 19467919 | 0 |
| CEU | chr16 | NPIP | 19517919 | 0 |
| CEU | chr16 | NPIP | 19567919 | 0 |
| CEU | chr16 | NPIP | 19617919 | 0 |
| CEU | chr16 | NPIP | 19667919 | 0 |
| CEU | chr16 | NPIP | 19717919 | 0 |
| CEU | chr16 | NPIP | 19767919 | 0 |
| CEU | chr16 | NPIP | 19817919 | 0 |
| CEU | chr16 | NPIP | 19867919 | 0 |
| CEU | chr16 | NPIP | 19917919 | 0 |
| CEU | chr16 | NPIP | 19967919 | 0 |
| CEU | chr16 | NPIP | 20017919 | 0 |
| CEU | chr16 | NPIP | 20067919 | 0 |
| CEU | chr16 | NPIP | 20117919 | 0 |
| CEU | chr16 | NPIP | 20167919 | 0 |
| CEU | chr16 | NPIP | 20217919 | 0 |
| CEU | chr16 | NPIP | 20267919 | 0 |
| CEU | chr16 | NPIP | 20317919 | 0 |
| CEU | chr16 | NPIP | 20367919 | 0 |
| CEU | chr16 | NPIP | 20417919 | 0 |
| CEU | chr16 | NPIP | 20467919 | 0 |
| CEU | chr16 | NPIP | 20517919 | 0 |
| CEU | chr16 | NPIP | 20567919 | 0 |
| CEU | chr16 | NPIP | 20617919 | 0 |
| CEU | chr16 | NPIP | 20667919 | 0 |
| CEU | chr16 | NPIP | 20717919 | 0 |
| CEU | chr16 | NPIP | 20767919 | 0 |
| CEU | chr16 | NPIP | 20817919 | 0 |
| CEU | chr16 | NPIP | 20867919 | 0 |
| CEU | chr16 | NPIP | 20917919 | 0 |
| CEU | chr16 | NPIP | 20967919 | 0 |
| CEU | chr16 | NPIP | 21017919 | 0 |

### 3\_Introgression\_data

|     |       |      |          |    |
|-----|-------|------|----------|----|
| CEU | chr16 | NPIP | 21067919 | 0  |
| CEU | chr16 | NPIP | 21117919 | 0  |
| CEU | chr16 | NPIP | 21167919 | 0  |
| CEU | chr16 | NPIP | 21217919 | 0  |
| CEU | chr16 | NPIP | 21267919 | 0  |
| CEU | chr16 | NPIP | 21317919 | 0  |
| CEU | chr16 | NPIP | 21367919 | 0  |
| CEU | chr16 | NPIP | 21417919 | 0  |
| CEU | chr16 | NPIP | 21467919 | 0  |
| CEU | chr16 | NPIP | 21517919 | 38 |
| CEU | chr16 | NPIP | 21567919 | 60 |
| CEU | chr16 | NPIP | 21617919 | 22 |
| CEU | chr16 | NPIP | 21667919 | 0  |
| CEU | chr16 | NPIP | 21717919 | 0  |
| CEU | chr16 | NPIP | 21767919 | 0  |
| CEU | chr16 | NPIP | 21817919 | 0  |
| CEU | chr16 | NPIP | 21867919 | 0  |
| CEU | chr16 | NPIP | 21917919 | 0  |
| CEU | chr16 | NPIP | 21967919 | 0  |
| CEU | chr16 | NPIP | 22017919 | 0  |
| CEU | chr16 | NPIP | 22067919 | 0  |
| CEU | chr16 | NPIP | 22117919 | 0  |
| CEU | chr16 | NPIP | 22167919 | 0  |
| CEU | chr16 | NPIP | 22217919 | 0  |
| CEU | chr16 | NPIP | 22267919 | 0  |
| CEU | chr16 | NPIP | 22317919 | 0  |
| CEU | chr16 | NPIP | 22367919 | 0  |
| CEU | chr16 | NPIP | 22417919 | 0  |
| CEU | chr16 | NPIP | 22467919 | 0  |
| CEU | chr16 | NPIP | 22517919 | 0  |
| CEU | chr16 | NPIP | 22567919 | 0  |
| CEU | chr16 | NPIP | 22617919 | 0  |
| CEU | chr16 | NPIP | 22667919 | 0  |
| CEU | chr16 | NPIP | 22717919 | 0  |
| CEU | chr16 | NPIP | 22767919 | 0  |
| CEU | chr16 | NPIP | 22817919 | 0  |
| CEU | chr16 | NPIP | 22867919 | 0  |
| CEU | chr16 | NPIP | 22917919 | 0  |
| CEU | chr16 | NPIP | 22967919 | 0  |
| CEU | chr16 | NPIP | 23017919 | 0  |
| CEU | chr16 | NPIP | 23067919 | 0  |
| CEU | chr16 | NPIP | 23117919 | 0  |
| CEU | chr16 | NPIP | 23167919 | 0  |
| CEU | chr16 | NPIP | 23217919 | 0  |
| CEU | chr16 | NPIP | 23267919 | 0  |
| CEU | chr16 | NPIP | 17553599 | 0  |
| CEU | chr16 | NPIP | 17603599 | 0  |
| CEU | chr16 | NPIP | 17653599 | 0  |
| CEU | chr16 | NPIP | 17703599 | 0  |

## 3\_Introgression\_data

|     |       |      |          |   |
|-----|-------|------|----------|---|
| CEU | chr16 | NPIP | 17753599 | 0 |
| CEU | chr16 | NPIP | 17803599 | 0 |
| CEU | chr16 | NPIP | 17853599 | 0 |
| CEU | chr16 | NPIP | 17903599 | 0 |
| CEU | chr16 | NPIP | 17953599 | 0 |
| CEU | chr16 | NPIP | 18003599 | 0 |
| CEU | chr16 | NPIP | 18053599 | 0 |
| CEU | chr16 | NPIP | 18103599 | 0 |
| CEU | chr16 | NPIP | 18153599 | 0 |
| CEU | chr16 | NPIP | 18203599 | 0 |
| CEU | chr16 | NPIP | 18253599 | 0 |
| CEU | chr16 | NPIP | 18303599 | 0 |
| CEU | chr16 | NPIP | 18353599 | 0 |
| CEU | chr16 | NPIP | 18403599 | 0 |
| CEU | chr16 | NPIP | 18453599 | 0 |
| CEU | chr16 | NPIP | 18503599 | 0 |
| CEU | chr16 | NPIP | 18553599 | 0 |
| CEU | chr16 | NPIP | 18603599 | 0 |
| CEU | chr16 | NPIP | 18653599 | 0 |
| CEU | chr16 | NPIP | 18703599 | 0 |
| CEU | chr16 | NPIP | 18753599 | 0 |
| CEU | chr16 | NPIP | 18803599 | 0 |
| CEU | chr16 | NPIP | 18853599 | 0 |
| CEU | chr16 | NPIP | 18903599 | 0 |
| CEU | chr16 | NPIP | 18953599 | 0 |
| CEU | chr16 | NPIP | 19003599 | 0 |
| CEU | chr16 | NPIP | 19053599 | 0 |
| CEU | chr16 | NPIP | 19103599 | 0 |
| CEU | chr16 | NPIP | 19153599 | 0 |
| CEU | chr16 | NPIP | 19203599 | 0 |
| CEU | chr16 | NPIP | 19253599 | 0 |
| CEU | chr16 | NPIP | 19303599 | 0 |
| CEU | chr16 | NPIP | 19353599 | 0 |
| CEU | chr16 | NPIP | 19403599 | 0 |
| CEU | chr16 | NPIP | 19453599 | 0 |
| CEU | chr16 | NPIP | 19503599 | 0 |
| CEU | chr16 | NPIP | 19553599 | 0 |
| CEU | chr16 | NPIP | 19603599 | 0 |
| CEU | chr16 | NPIP | 19653599 | 0 |
| CEU | chr16 | NPIP | 19703599 | 0 |
| CEU | chr16 | NPIP | 19753599 | 0 |
| CEU | chr16 | NPIP | 19803599 | 0 |
| CEU | chr16 | NPIP | 19853599 | 0 |
| CEU | chr16 | NPIP | 19903599 | 0 |
| CEU | chr16 | NPIP | 19953599 | 0 |
| CEU | chr16 | NPIP | 20003599 | 0 |
| CEU | chr16 | NPIP | 20053599 | 0 |
| CEU | chr16 | NPIP | 20103599 | 0 |
| CEU | chr16 | NPIP | 20153599 | 0 |

## 3\_Introgression\_data

|     |       |      |          |    |
|-----|-------|------|----------|----|
| CEU | chr16 | NPIP | 20203599 | 0  |
| CEU | chr16 | NPIP | 20253599 | 0  |
| CEU | chr16 | NPIP | 20303599 | 0  |
| CEU | chr16 | NPIP | 20353599 | 0  |
| CEU | chr16 | NPIP | 20403599 | 0  |
| CEU | chr16 | NPIP | 20453599 | 0  |
| CEU | chr16 | NPIP | 20503599 | 0  |
| CEU | chr16 | NPIP | 20553599 | 0  |
| CEU | chr16 | NPIP | 20603599 | 0  |
| CEU | chr16 | NPIP | 20653599 | 0  |
| CEU | chr16 | NPIP | 20703599 | 0  |
| CEU | chr16 | NPIP | 20753599 | 0  |
| CEU | chr16 | NPIP | 20803599 | 0  |
| CEU | chr16 | NPIP | 20853599 | 0  |
| CEU | chr16 | NPIP | 20903599 | 0  |
| CEU | chr16 | NPIP | 20953599 | 0  |
| CEU | chr16 | NPIP | 21003599 | 0  |
| CEU | chr16 | NPIP | 21053599 | 0  |
| CEU | chr16 | NPIP | 21103599 | 0  |
| CEU | chr16 | NPIP | 21153599 | 0  |
| CEU | chr16 | NPIP | 21203599 | 0  |
| CEU | chr16 | NPIP | 21253599 | 0  |
| CEU | chr16 | NPIP | 21303599 | 0  |
| CEU | chr16 | NPIP | 21353599 | 0  |
| CEU | chr16 | NPIP | 21403599 | 0  |
| CEU | chr16 | NPIP | 21453599 | 0  |
| CEU | chr16 | NPIP | 21503599 | 35 |
| CEU | chr16 | NPIP | 21553599 | 57 |
| CEU | chr16 | NPIP | 21603599 | 25 |
| CEU | chr16 | NPIP | 21653599 | 3  |
| CEU | chr16 | NPIP | 21703599 | 0  |
| CEU | chr16 | NPIP | 21753599 | 0  |
| CEU | chr16 | NPIP | 21803599 | 0  |
| CEU | chr16 | NPIP | 21853599 | 0  |
| CEU | chr16 | NPIP | 21903599 | 0  |
| CEU | chr16 | NPIP | 21953599 | 0  |
| CEU | chr16 | NPIP | 22003599 | 0  |
| CEU | chr16 | NPIP | 22053599 | 0  |
| CEU | chr16 | NPIP | 22103599 | 0  |
| CEU | chr16 | NPIP | 22153599 | 0  |
| CEU | chr16 | NPIP | 22203599 | 0  |
| CEU | chr16 | NPIP | 22253599 | 0  |
| CEU | chr16 | NPIP | 22303599 | 0  |
| CEU | chr16 | NPIP | 22353599 | 0  |
| CEU | chr16 | NPIP | 22403599 | 0  |
| CEU | chr16 | NPIP | 22453599 | 0  |
| CEU | chr16 | NPIP | 22503599 | 0  |
| CEU | chr16 | NPIP | 22553599 | 0  |
| CEU | chr16 | NPIP | 22603599 | 0  |



### 3\_Introgression\_data

|     |       |      |          |    |
|-----|-------|------|----------|----|
| CEU | chr16 | NPIP | 22653599 | 0  |
| CEU | chr16 | NPIP | 22703599 | 0  |
| CEU | chr16 | NPIP | 22753599 | 0  |
| CEU | chr16 | NPIP | 22803599 | 0  |
| CEU | chr16 | NPIP | 22853599 | 0  |
| CEU | chr16 | NPIP | 22903599 | 0  |
| CEU | chr16 | NPIP | 22953599 | 0  |
| CEU | chr16 | NPIP | 23003599 | 0  |
| CEU | chr16 | NPIP | 23053599 | 0  |
| CEU | chr16 | NPIP | 23103599 | 0  |
| CEU | chr16 | NPIP | 23153599 | 0  |
| CEU | chr16 | NPIP | 23203599 | 0  |
| CEU | chr16 | NPIP | 23253599 | 0  |
| CEU | chr16 | NPIP | 23303599 | 0  |
| CEU | chr16 | NPIP | 23353599 | 0  |
| CEU | chr16 | NPIP | 23403599 | 0  |
| CEU | chr16 | NPIP | 23453599 | 0  |
| CEU | chr16 | NPIP | 23503599 | 0  |
| CEU | chr16 | NPIP | 23553599 | 0  |
| CEU | chr16 | NPIP | 23603599 | 0  |
| CEU | chr16 | NPIP | 23653599 | 0  |
| CEU | chr16 | NPIP | 23703599 | 0  |
| CEU | chr16 | NPIP | 23753599 | 0  |
| CEU | chr16 | NPIP | 23803599 | 13 |
| CEU | chr16 | NPIP | 23853599 | 36 |
| CEU | chr16 | NPIP | 23903599 | 53 |
| CEU | chr16 | NPIP | 23953599 | 39 |
| CEU | chr16 | NPIP | 24003599 | 15 |
| CEU | chr16 | NPIP | 24053599 | 6  |
| CEU | chr16 | NPIP | 24103599 | 0  |
| CEU | chr16 | NPIP | 24153599 | 0  |
| CEU | chr16 | NPIP | 24203599 | 0  |
| CEU | chr16 | NPIP | 24253599 | 0  |
| CEU | chr16 | NPIP | 24303599 | 0  |
| CEU | chr16 | NPIP | 24353599 | 0  |
| CEU | chr16 | NPIP | 24403599 | 0  |
| CEU | chr16 | NPIP | 24453599 | 0  |
| CEU | chr16 | NPIP | 24503599 | 0  |
| CEU | chr16 | NPIP | 24553599 | 0  |
| CEU | chr16 | NPIP | 24603599 | 0  |
| CEU | chr16 | NPIP | 24653599 | 0  |
| CEU | chr16 | NPIP | 24703599 | 0  |
| CEU | chr16 | NPIP | 24753599 | 0  |
| CEU | chr16 | NPIP | 24803599 | 0  |
| CEU | chr16 | NPIP | 24853599 | 0  |
| CEU | chr16 | NPIP | 24903599 | 0  |
| CEU | chr16 | NPIP | 24953599 | 0  |
| CEU | chr16 | NPIP | 25003599 | 0  |
| CEU | chr16 | NPIP | 25053599 | 0  |

3\_Introgression\_data

|     |       |      |          |    |
|-----|-------|------|----------|----|
| CEU | chr16 | NPIP | 25103599 | 0  |
| CEU | chr16 | NPIP | 25153599 | 0  |
| CEU | chr16 | NPIP | 25203599 | 0  |
| CEU | chr16 | NPIP | 25253599 | 0  |
| CEU | chr16 | NPIP | 25303599 | 0  |
| CEU | chr16 | NPIP | 25353599 | 0  |
| CEU | chr16 | NPIP | 25403599 | 0  |
| CEU | chr16 | NPIP | 25453599 | 0  |
| CEU | chr16 | NPIP | 25503599 | 0  |
| CEU | chr16 | NPIP | 25553599 | 0  |
| CEU | chr16 | NPIP | 25603599 | 0  |
| CEU | chr16 | NPIP | 25653599 | 0  |
| CEU | chr16 | NPIP | 25703599 | 0  |
| CEU | chr16 | NPIP | 25753599 | 0  |
| CEU | chr16 | NPIP | 25803599 | 0  |
| CEU | chr16 | NPIP | 25853599 | 0  |
| CEU | chr16 | NPIP | 25903599 | 9  |
| CEU | chr16 | NPIP | 25953599 | 46 |
| CEU | chr16 | NPIP | 26003599 | 37 |
| CEU | chr16 | NPIP | 26053599 | 0  |
| CEU | chr16 | NPIP | 26103599 | 0  |
| CEU | chr16 | NPIP | 26153599 | 0  |
| CEU | chr16 | NPIP | 26203599 | 0  |
| CEU | chr16 | NPIP | 26253599 | 0  |
| CEU | chr16 | NPIP | 26303599 | 0  |
| CEU | chr16 | NPIP | 26353599 | 0  |
| CEU | chr16 | NPIP | 26403599 | 0  |
| CEU | chr16 | NPIP | 26453599 | 0  |
| CEU | chr16 | NPIP | 26503599 | 0  |
| CEU | chr16 | NPIP | 26553599 | 0  |
| CEU | chr16 | NPIP | 26603599 | 0  |
| CEU | chr16 | NPIP | 26653599 | 0  |
| CEU | chr16 | NPIP | 26703599 | 0  |
| CEU | chr16 | NPIP | 26753599 | 0  |
| CEU | chr16 | NPIP | 26803599 | 0  |
| CEU | chr16 | NPIP | 26853599 | 0  |
| CEU | chr16 | NPIP | 26903599 | 0  |
| CEU | chr16 | NPIP | 26953599 | 0  |
| CEU | chr16 | NPIP | 27003599 | 0  |
| CEU | chr16 | NPIP | 27053599 | 0  |
| CEU | chr16 | NPIP | 27103599 | 0  |
| CEU | chr16 | NPIP | 27153599 | 0  |
| CEU | chr16 | NPIP | 27203599 | 0  |
| CEU | chr16 | NPIP | 27253599 | 0  |
| CEU | chr16 | NPIP | 27303599 | 0  |
| CEU | chr16 | NPIP | 27353599 | 0  |
| CEU | chr16 | NPIP | 27403599 | 0  |
| CEU | chr16 | NPIP | 27453599 | 0  |
| CEU | chr16 | NPIP | 23392517 | 0  |

## 3\_Introgression\_data

|     |       |      |          |    |
|-----|-------|------|----------|----|
| CEU | chr16 | NPIP | 23442517 | 0  |
| CEU | chr16 | NPIP | 23492517 | 0  |
| CEU | chr16 | NPIP | 23542517 | 0  |
| CEU | chr16 | NPIP | 23592517 | 0  |
| CEU | chr16 | NPIP | 23642517 | 0  |
| CEU | chr16 | NPIP | 23692517 | 0  |
| CEU | chr16 | NPIP | 23742517 | 0  |
| CEU | chr16 | NPIP | 23792517 | 11 |
| CEU | chr16 | NPIP | 23842517 | 28 |
| CEU | chr16 | NPIP | 23892517 | 49 |
| CEU | chr16 | NPIP | 23942517 | 43 |
| CEU | chr16 | NPIP | 23992517 | 21 |
| CEU | chr16 | NPIP | 24042517 | 10 |
| CEU | chr16 | NPIP | 24092517 | 0  |
| CEU | chr16 | NPIP | 24142517 | 0  |
| CEU | chr16 | NPIP | 24192517 | 0  |
| CEU | chr16 | NPIP | 24242517 | 0  |
| CEU | chr16 | NPIP | 24292517 | 0  |
| CEU | chr16 | NPIP | 24342517 | 0  |
| CEU | chr16 | NPIP | 24392517 | 0  |
| CEU | chr16 | NPIP | 24442517 | 0  |
| CEU | chr16 | NPIP | 24492517 | 0  |
| CEU | chr16 | NPIP | 24542517 | 0  |
| CEU | chr16 | NPIP | 24592517 | 0  |
| CEU | chr16 | NPIP | 24642517 | 0  |
| CEU | chr16 | NPIP | 24692517 | 0  |
| CEU | chr16 | NPIP | 24742517 | 0  |
| CEU | chr16 | NPIP | 24792517 | 0  |
| CEU | chr16 | NPIP | 24842517 | 0  |
| CEU | chr16 | NPIP | 24892517 | 0  |
| CEU | chr16 | NPIP | 24942517 | 0  |
| CEU | chr16 | NPIP | 24992517 | 0  |
| CEU | chr16 | NPIP | 25042517 | 0  |
| CEU | chr16 | NPIP | 25092517 | 0  |
| CEU | chr16 | NPIP | 25142517 | 0  |
| CEU | chr16 | NPIP | 25192517 | 0  |
| CEU | chr16 | NPIP | 25242517 | 0  |
| CEU | chr16 | NPIP | 25292517 | 0  |
| CEU | chr16 | NPIP | 25342517 | 0  |
| CEU | chr16 | NPIP | 25392517 | 0  |
| CEU | chr16 | NPIP | 25442517 | 0  |
| CEU | chr16 | NPIP | 25492517 | 0  |
| CEU | chr16 | NPIP | 25542517 | 0  |
| CEU | chr16 | NPIP | 25592517 | 0  |
| CEU | chr16 | NPIP | 25642517 | 0  |
| CEU | chr16 | NPIP | 25692517 | 0  |
| CEU | chr16 | NPIP | 25742517 | 0  |
| CEU | chr16 | NPIP | 25792517 | 0  |
| CEU | chr16 | NPIP | 25842517 | 0  |

## 3\_Introgression\_data

|     |       |      |          |    |
|-----|-------|------|----------|----|
| CEU | chr16 | NPIP | 25892517 | 7  |
| CEU | chr16 | NPIP | 25942517 | 46 |
| CEU | chr16 | NPIP | 25992517 | 39 |
| CEU | chr16 | NPIP | 26042517 | 0  |
| CEU | chr16 | NPIP | 26092517 | 0  |
| CEU | chr16 | NPIP | 26142517 | 0  |
| CEU | chr16 | NPIP | 26192517 | 0  |
| CEU | chr16 | NPIP | 26242517 | 0  |
| CEU | chr16 | NPIP | 26292517 | 0  |
| CEU | chr16 | NPIP | 26342517 | 0  |
| CEU | chr16 | NPIP | 26392517 | 0  |
| CEU | chr16 | NPIP | 26442517 | 0  |
| CEU | chr16 | NPIP | 26492517 | 0  |
| CEU | chr16 | NPIP | 26542517 | 0  |
| CEU | chr16 | NPIP | 26592517 | 0  |
| CEU | chr16 | NPIP | 26642517 | 0  |
| CEU | chr16 | NPIP | 26692517 | 0  |
| CEU | chr16 | NPIP | 26742517 | 0  |
| CEU | chr16 | NPIP | 26792517 | 0  |
| CEU | chr16 | NPIP | 26842517 | 0  |
| CEU | chr16 | NPIP | 26892517 | 0  |
| CEU | chr16 | NPIP | 26942517 | 0  |
| CEU | chr16 | NPIP | 26992517 | 0  |
| CEU | chr16 | NPIP | 27042517 | 0  |
| CEU | chr16 | NPIP | 27092517 | 0  |
| CEU | chr16 | NPIP | 27142517 | 0  |
| CEU | chr16 | NPIP | 27192517 | 0  |
| CEU | chr16 | NPIP | 27242517 | 0  |
| CEU | chr16 | NPIP | 27292517 | 0  |
| CEU | chr16 | NPIP | 27342517 | 0  |
| CEU | chr16 | NPIP | 27392517 | 0  |
| CEU | chr16 | NPIP | 27442517 | 0  |
| CEU | chr16 | NPIP | 27492517 | 0  |
| CEU | chr16 | NPIP | 27542517 | 0  |
| CEU | chr16 | NPIP | 27592517 | 0  |
| CEU | chr16 | NPIP | 27642517 | 0  |
| CEU | chr16 | NPIP | 27692517 | 0  |
| CEU | chr16 | NPIP | 27742517 | 0  |
| CEU | chr16 | NPIP | 27792517 | 0  |
| CEU | chr16 | NPIP | 27842517 | 0  |
| CEU | chr16 | NPIP | 27892517 | 0  |
| CEU | chr16 | NPIP | 27942517 | 0  |
| CEU | chr16 | NPIP | 27992517 | 0  |
| CEU | chr16 | NPIP | 28042517 | 0  |
| CEU | chr16 | NPIP | 28092517 | 0  |
| CEU | chr16 | NPIP | 28142517 | 0  |
| CEU | chr16 | NPIP | 28192517 | 0  |
| CEU | chr16 | NPIP | 28242517 | 0  |
| CEU | chr16 | NPIP | 28292517 | 0  |

3\_Introgression\_data

|     |       |      |          |   |
|-----|-------|------|----------|---|
| CEU | chr16 | NPIP | 28342517 | 0 |
| CEU | chr16 | NPIP | 28392517 | 0 |
| CEU | chr16 | NPIP | 28442517 | 0 |
| CEU | chr16 | NPIP | 28492517 | 0 |
| CEU | chr16 | NPIP | 28542517 | 0 |
| CEU | chr16 | NPIP | 28592517 | 0 |
| CEU | chr16 | NPIP | 28642517 | 0 |
| CEU | chr16 | NPIP | 28692517 | 0 |
| CEU | chr16 | NPIP | 28742517 | 0 |
| CEU | chr16 | NPIP | 28792517 | 0 |
| CEU | chr16 | NPIP | 28842517 | 0 |
| CEU | chr16 | NPIP | 28892517 | 0 |
| CEU | chr16 | NPIP | 28942517 | 0 |
| CEU | chr16 | NPIP | 28992517 | 0 |
| CEU | chr16 | NPIP | 29042517 | 0 |
| CEU | chr16 | NPIP | 29092517 | 0 |
| CEU | chr16 | NPIP | 29142517 | 0 |
| CEU | chr16 | NPIP | 29192517 | 0 |
| CEU | chr16 | NPIP | 29242517 | 0 |
| CEU | chr16 | NPIP | 29292517 | 0 |
| CEU | chr16 | NPIP | 29342517 | 0 |
| CEU | chr16 | NPIP | 29392517 | 0 |
| CEU | chr16 | NPIP | 29442517 | 0 |
| CEU | chr16 | NPIP | 29492517 | 0 |
| CEU | chr16 | NPIP | 29542517 | 0 |
| CEU | chr16 | NPIP | 29592517 | 0 |
| CEU | chr16 | NPIP | 29642517 | 0 |
| CEU | chr16 | NPIP | 29692517 | 0 |
| CEU | chr16 | NPIP | 29742517 | 0 |
| CEU | chr16 | NPIP | 29792517 | 0 |
| CEU | chr16 | NPIP | 29842517 | 0 |
| CEU | chr16 | NPIP | 29892517 | 0 |
| CEU | chr16 | NPIP | 29942517 | 0 |
| CEU | chr16 | NPIP | 29992517 | 0 |
| CEU | chr16 | NPIP | 30042517 | 0 |
| CEU | chr16 | NPIP | 30092517 | 0 |
| CEU | chr16 | NPIP | 30142517 | 0 |
| CEU | chr16 | NPIP | 30192517 | 0 |
| CEU | chr16 | NPIP | 30242517 | 0 |
| CEU | chr16 | NPIP | 30292517 | 0 |
| CEU | chr16 | NPIP | 30342517 | 0 |
| CEU | chr16 | NPIP | 30392517 | 0 |
| CEU | chr16 | NPIP | 30442517 | 0 |
| CEU | chr16 | NPIP | 30492517 | 0 |
| CEU | chr16 | NPIP | 30542517 | 0 |
| CEU | chr16 | NPIP | 30592517 | 0 |
| CEU | chr16 | NPIP | 30642517 | 0 |
| CEU | chr16 | NPIP | 30692517 | 0 |
| CEU | chr16 | NPIP | 30742517 | 0 |

## 3\_Introgression\_data

|     |       |      |          |   |
|-----|-------|------|----------|---|
| CEU | chr16 | NPIP | 30792517 | 0 |
| CEU | chr16 | NPIP | 30842517 | 0 |
| CEU | chr16 | NPIP | 30892517 | 0 |
| CEU | chr16 | NPIP | 30942517 | 0 |
| CEU | chr16 | NPIP | 30992517 | 0 |
| CEU | chr16 | NPIP | 31042517 | 0 |
| CEU | chr16 | NPIP | 31092517 | 0 |
| CEU | chr16 | NPIP | 31142517 | 0 |
| CEU | chr16 | NPIP | 31192517 | 0 |
| CEU | chr16 | NPIP | 31242517 | 0 |
| CEU | chr16 | NPIP | 31292517 | 0 |
| CEU | chr16 | NPIP | 31342517 | 0 |
| CEU | chr16 | NPIP | 31392517 | 0 |
| CEU | chr16 | NPIP | 31442517 | 0 |
| CEU | chr16 | NPIP | 31492517 | 0 |
| CEU | chr16 | NPIP | 31542517 | 0 |
| CEU | chr16 | NPIP | 31592517 | 0 |
| CEU | chr16 | NPIP | 31642517 | 0 |
| CEU | chr16 | NPIP | 31692517 | 0 |
| CEU | chr16 | NPIP | 31742517 | 0 |
| CEU | chr16 | NPIP | 31792517 | 0 |
| CEU | chr16 | NPIP | 31842517 | 0 |
| CEU | chr16 | NPIP | 31892517 | 0 |
| CEU | chr16 | NPIP | 31942517 | 0 |
| CEU | chr16 | NPIP | 31992517 | 0 |
| CEU | chr16 | NPIP | 32042517 | 0 |
| CEU | chr16 | NPIP | 32092517 | 0 |
| CEU | chr16 | NPIP | 32142517 | 0 |
| CEU | chr16 | NPIP | 32192517 | 0 |
| CEU | chr16 | NPIP | 32242517 | 0 |
| CEU | chr16 | NPIP | 32292517 | 0 |
| CEU | chr16 | NPIP | 32342517 | 0 |
| CEU | chr16 | NPIP | 32392517 | 0 |
| CEU | chr16 | NPIP | 32442517 | 0 |
| CEU | chr16 | NPIP | 32492517 | 0 |
| CEU | chr16 | NPIP | 32542517 | 0 |
| CEU | chr16 | NPIP | 32592517 | 0 |
| CEU | chr16 | NPIP | 32642517 | 0 |
| CEU | chr16 | NPIP | 32692517 | 0 |
| CEU | chr16 | NPIP | 32742517 | 0 |
| CEU | chr16 | NPIP | 32792517 | 0 |
| CEU | chr16 | NPIP | 32842517 | 0 |
| CEU | chr16 | NPIP | 32892517 | 0 |
| CEU | chr16 | NPIP | 32942517 | 0 |
| CEU | chr16 | NPIP | 32992517 | 0 |
| CEU | chr16 | NPIP | 33042517 | 0 |
| CEU | chr16 | NPIP | 33092517 | 0 |
| CEU | chr16 | NPIP | 33142517 | 0 |
| CEU | chr16 | NPIP | 33192517 | 0 |

## 3\_Introgression\_data

|     |       |      |          |   |
|-----|-------|------|----------|---|
| CEU | chr16 | NPIP | 33242517 | 0 |
| CEU | chr16 | NPIP | 33292517 | 0 |
| CEU | chr16 | NPIP | 69424986 | 0 |
| CEU | chr16 | NPIP | 69474986 | 0 |
| CEU | chr16 | NPIP | 69524986 | 0 |
| CEU | chr16 | NPIP | 69574986 | 0 |
| CEU | chr16 | NPIP | 69624986 | 0 |
| CEU | chr16 | NPIP | 69674986 | 0 |
| CEU | chr16 | NPIP | 69724986 | 0 |
| CEU | chr16 | NPIP | 69774986 | 0 |
| CEU | chr16 | NPIP | 69824986 | 0 |
| CEU | chr16 | NPIP | 69874986 | 0 |
| CEU | chr16 | NPIP | 69924986 | 0 |
| CEU | chr16 | NPIP | 69974986 | 0 |
| CEU | chr16 | NPIP | 70024986 | 0 |
| CEU | chr16 | NPIP | 70074986 | 0 |
| CEU | chr16 | NPIP | 70124986 | 0 |
| CEU | chr16 | NPIP | 70174986 | 0 |
| CEU | chr16 | NPIP | 70224986 | 0 |
| CEU | chr16 | NPIP | 70274986 | 0 |
| CEU | chr16 | NPIP | 70324986 | 0 |
| CEU | chr16 | NPIP | 70374986 | 0 |
| CEU | chr16 | NPIP | 70424986 | 0 |
| CEU | chr16 | NPIP | 70474986 | 0 |
| CEU | chr16 | NPIP | 70524986 | 0 |
| CEU | chr16 | NPIP | 70574986 | 0 |
| CEU | chr16 | NPIP | 70624986 | 0 |
| CEU | chr16 | NPIP | 70674986 | 0 |
| CEU | chr16 | NPIP | 70724986 | 0 |
| CEU | chr16 | NPIP | 70774986 | 0 |
| CEU | chr16 | NPIP | 70824986 | 0 |
| CEU | chr16 | NPIP | 70874986 | 0 |
| CEU | chr16 | NPIP | 70924986 | 0 |
| CEU | chr16 | NPIP | 70974986 | 0 |
| CEU | chr16 | NPIP | 71024986 | 0 |
| CEU | chr16 | NPIP | 71074986 | 0 |
| CEU | chr16 | NPIP | 71124986 | 0 |
| CEU | chr16 | NPIP | 71174986 | 0 |
| CEU | chr16 | NPIP | 71224986 | 0 |
| CEU | chr16 | NPIP | 71274986 | 0 |
| CEU | chr16 | NPIP | 71324986 | 0 |
| CEU | chr16 | NPIP | 71374986 | 0 |
| CEU | chr16 | NPIP | 71424986 | 0 |
| CEU | chr16 | NPIP | 71474986 | 0 |
| CEU | chr16 | NPIP | 71524986 | 0 |
| CEU | chr16 | NPIP | 71574986 | 0 |
| CEU | chr16 | NPIP | 71624986 | 0 |
| CEU | chr16 | NPIP | 71674986 | 0 |
| CEU | chr16 | NPIP | 71724986 | 0 |

### 3\_Introgression\_data

|     |       |      |          |   |
|-----|-------|------|----------|---|
| CEU | chr16 | NPIP | 71774986 | 0 |
| CEU | chr16 | NPIP | 71824986 | 0 |
| CEU | chr16 | NPIP | 71874986 | 0 |
| CEU | chr16 | NPIP | 71924986 | 0 |
| CEU | chr16 | NPIP | 71974986 | 0 |
| CEU | chr16 | NPIP | 72024986 | 0 |
| CEU | chr16 | NPIP | 72074986 | 0 |
| CEU | chr16 | NPIP | 72124986 | 0 |
| CEU | chr16 | NPIP | 72174986 | 0 |
| CEU | chr16 | NPIP | 72224986 | 0 |
| CEU | chr16 | NPIP | 72274986 | 0 |
| CEU | chr16 | NPIP | 72324986 | 0 |
| CEU | chr16 | NPIP | 72374986 | 0 |
| CEU | chr16 | NPIP | 72424986 | 0 |
| CEU | chr16 | NPIP | 72474986 | 0 |
| CEU | chr16 | NPIP | 72524986 | 0 |
| CEU | chr16 | NPIP | 72574986 | 0 |
| CEU | chr16 | NPIP | 72624986 | 0 |
| CEU | chr16 | NPIP | 72674986 | 0 |
| CEU | chr16 | NPIP | 72724986 | 0 |
| CEU | chr16 | NPIP | 72774986 | 0 |
| CEU | chr16 | NPIP | 72824986 | 0 |
| CEU | chr16 | NPIP | 72874986 | 0 |
| CEU | chr16 | NPIP | 72924986 | 0 |
| CEU | chr16 | NPIP | 72974986 | 0 |
| CEU | chr16 | NPIP | 73024986 | 0 |
| CEU | chr16 | NPIP | 73074986 | 0 |
| CEU | chr16 | NPIP | 73124986 | 0 |
| CEU | chr16 | NPIP | 73174986 | 0 |
| CEU | chr16 | NPIP | 73224986 | 0 |
| CEU | chr16 | NPIP | 73274986 | 0 |
| CEU | chr16 | NPIP | 73324986 | 0 |
| CEU | chr16 | NPIP | 73374986 | 0 |
| CEU | chr16 | NPIP | 73424986 | 0 |
| CEU | chr16 | NPIP | 73474986 | 0 |
| CEU | chr16 | NPIP | 73524986 | 0 |
| CEU | chr16 | NPIP | 73574986 | 0 |
| CEU | chr16 | NPIP | 73624986 | 0 |
| CEU | chr16 | NPIP | 73674986 | 0 |
| CEU | chr16 | NPIP | 73724986 | 0 |
| CEU | chr16 | NPIP | 73774986 | 0 |
| CEU | chr16 | NPIP | 73824986 | 0 |
| CEU | chr16 | NPIP | 73874986 | 0 |
| CEU | chr16 | NPIP | 73924986 | 0 |
| CEU | chr16 | NPIP | 73974986 | 0 |
| CEU | chr16 | NPIP | 74024986 | 0 |
| CEU | chr16 | NPIP | 74074986 | 0 |
| CEU | chr16 | NPIP | 74124986 | 0 |
| CEU | chr16 | NPIP | 74174986 | 0 |



### 3\_Introgression\_data

|     |       |      |          |    |
|-----|-------|------|----------|----|
| CEU | chr16 | NPIP | 74224986 | 0  |
| CEU | chr16 | NPIP | 74274986 | 0  |
| CEU | chr16 | NPIP | 74324986 | 0  |
| CEU | chr16 | NPIP | 74374986 | 0  |
| CEU | chr16 | NPIP | 74424986 | 0  |
| CEU | chr16 | NPIP | 74474986 | 0  |
| CEU | chr16 | NPIP | 74524986 | 0  |
| CEU | chr16 | NPIP | 74574986 | 0  |
| CEU | chr16 | NPIP | 74624986 | 0  |
| CEU | chr16 | NPIP | 74674986 | 0  |
| CEU | chr16 | NPIP | 74724986 | 0  |
| CEU | chr16 | NPIP | 74774986 | 0  |
| CEU | chr16 | NPIP | 74824986 | 0  |
| CEU | chr16 | NPIP | 74874986 | 0  |
| CEU | chr16 | NPIP | 74924986 | 0  |
| CEU | chr16 | NPIP | 74974986 | 0  |
| CEU | chr16 | NPIP | 75024986 | 0  |
| CEU | chr16 | NPIP | 75074986 | 0  |
| CEU | chr16 | NPIP | 75124986 | 0  |
| CEU | chr16 | NPIP | 75174986 | 0  |
| CEU | chr16 | NPIP | 75224986 | 0  |
| CEU | chr16 | NPIP | 75274986 | 0  |
| CEU | chr16 | NPIP | 75324986 | 0  |
| CEU | chr16 | NPIP | 75374986 | 0  |
| CEU | chr16 | NPIP | 75424986 | 0  |
| CEU | chr16 | NPIP | 75474986 | 0  |
| CEU | chr16 | NPIP | 75524986 | 0  |
| CEU | chr16 | NPIP | 75574986 | 0  |
| CEU | chr16 | NPIP | 75624986 | 0  |
| CEU | chr16 | NPIP | 75674986 | 0  |
| CEU | chr16 | NPIP | 75724986 | 0  |
| CEU | chr16 | NPIP | 75774986 | 0  |
| CEU | chr16 | NPIP | 75824986 | 0  |
| CEU | chr16 | NPIP | 75874986 | 0  |
| CEU | chr16 | NPIP | 75924986 | 0  |
| CEU | chr16 | NPIP | 75974986 | 0  |
| CEU | chr16 | NPIP | 76024986 | 0  |
| CEU | chr16 | NPIP | 76074986 | 0  |
| CEU | chr16 | NPIP | 76124986 | 0  |
| CEU | chr16 | NPIP | 76174986 | 0  |
| CEU | chr16 | NPIP | 76224986 | 0  |
| CEU | chr16 | NPIP | 76274986 | 0  |
| CEU | chr16 | NPIP | 76324986 | 0  |
| CEU | chr16 | NPIP | 76374986 | 0  |
| CEU | chr16 | NPIP | 76424986 | 0  |
| CEU | chr16 | NPIP | 76474986 | 0  |
| CEU | chr16 | NPIP | 76524986 | 21 |
| CEU | chr16 | NPIP | 76574986 | 30 |
| CEU | chr16 | NPIP | 76624986 | 22 |

### 3\_Introgression\_data

|     |       |      |          |     |
|-----|-------|------|----------|-----|
| CEU | chr16 | NPIP | 76674986 | 25  |
| CEU | chr16 | NPIP | 76724986 | 30  |
| CEU | chr16 | NPIP | 76774986 | 28  |
| CEU | chr16 | NPIP | 76824986 | 50  |
| CEU | chr16 | NPIP | 76874986 | 54  |
| CEU | chr16 | NPIP | 76924986 | 35  |
| CEU | chr16 | NPIP | 76974986 | 39  |
| CEU | chr16 | NPIP | 77024986 | 31  |
| CEU | chr16 | NPIP | 77074986 | 24  |
| CEU | chr16 | NPIP | 77124986 | 47  |
| CEU | chr16 | NPIP | 77174986 | 59  |
| CEU | chr16 | NPIP | 77224986 | 34  |
| CEU | chr16 | NPIP | 77274986 | 41  |
| CEU | chr16 | NPIP | 77324986 | 90  |
| CEU | chr16 | NPIP | 77374986 | 96  |
| CEU | chr16 | NPIP | 77424986 | 57  |
| CEU | chr16 | NPIP | 77474986 | 28  |
| CEU | chr16 | NPIP | 77524986 | 39  |
| CEU | chr16 | NPIP | 77574986 | 58  |
| CEU | chr16 | NPIP | 77624986 | 48  |
| CEU | chr16 | NPIP | 77674986 | 31  |
| CEU | chr16 | NPIP | 77724986 | 20  |
| CEU | chr16 | NPIP | 77774986 | 21  |
| CEU | chr16 | NPIP | 77824986 | 24  |
| CEU | chr16 | NPIP | 77874986 | 17  |
| CEU | chr16 | NPIP | 77924986 | 15  |
| CEU | chr16 | NPIP | 77974986 | 30  |
| CEU | chr16 | NPIP | 78024986 | 37  |
| CEU | chr16 | NPIP | 78074986 | 107 |
| CEU | chr16 | NPIP | 78124986 | 117 |
| CEU | chr16 | NPIP | 78174986 | 68  |
| CEU | chr16 | NPIP | 78224986 | 64  |
| CEU | chr16 | NPIP | 78274986 | 39  |
| CEU | chr16 | NPIP | 78324986 | 38  |
| CEU | chr16 | NPIP | 78374986 | 95  |
| CEU | chr16 | NPIP | 78424986 | 74  |
| CEU | chr16 | NPIP | 78474986 | 8   |
| CEU | chr16 | NPIP | 78524986 | 16  |
| CEU | chr16 | NPIP | 78574986 | 18  |
| CEU | chr16 | NPIP | 78624986 | 24  |
| CEU | chr16 | NPIP | 78674986 | 74  |
| CEU | chr16 | NPIP | 78724986 | 119 |
| CEU | chr16 | NPIP | 78774986 | 62  |
| CEU | chr16 | NPIP | 78824986 | 44  |
| CEU | chr16 | NPIP | 78874986 | 73  |
| CEU | chr16 | NPIP | 78924986 | 44  |
| CEU | chr16 | NPIP | 78974986 | 15  |
| CEU | chr16 | NPIP | 79024986 | 0   |
| CEU | chr16 | NPIP | 79074986 | 0   |

### 3\_Introgression\_data

|     |       |      |          |     |
|-----|-------|------|----------|-----|
| CEU | chr16 | NPIP | 79124986 | 0   |
| CEU | chr16 | NPIP | 79174986 | 0   |
| CEU | chr16 | NPIP | 79224986 | 0   |
| CEU | chr16 | NPIP | 79274986 | 0   |
| CEU | chr16 | NPIP | 79324986 | 0   |
| CEU | chr11 | PGA3 | 56253515 | 68  |
| CEU | chr11 | PGA3 | 56303515 | 71  |
| CEU | chr11 | PGA3 | 56353515 | 74  |
| CEU | chr11 | PGA3 | 56403515 | 75  |
| CEU | chr11 | PGA3 | 56453515 | 61  |
| CEU | chr11 | PGA3 | 56503515 | 40  |
| CEU | chr11 | PGA3 | 56553515 | 42  |
| CEU | chr11 | PGA3 | 56603515 | 73  |
| CEU | chr11 | PGA3 | 56653515 | 69  |
| CEU | chr11 | PGA3 | 56703515 | 56  |
| CEU | chr11 | PGA3 | 56753515 | 102 |
| CEU | chr11 | PGA3 | 56803515 | 128 |
| CEU | chr11 | PGA3 | 56853515 | 102 |
| CEU | chr11 | PGA3 | 56903515 | 53  |
| CEU | chr11 | PGA3 | 56953515 | 27  |
| CEU | chr11 | PGA3 | 57003515 | 39  |
| CEU | chr11 | PGA3 | 57053515 | 62  |
| CEU | chr11 | PGA3 | 57103515 | 63  |
| CEU | chr11 | PGA3 | 57153515 | 27  |
| CEU | chr11 | PGA3 | 57203515 | 0   |
| CEU | chr11 | PGA3 | 57253515 | 0   |
| CEU | chr11 | PGA3 | 57303515 | 0   |
| CEU | chr11 | PGA3 | 57353515 | 0   |
| CEU | chr11 | PGA3 | 57403515 | 0   |
| CEU | chr11 | PGA3 | 57453515 | 0   |
| CEU | chr11 | PGA3 | 57503515 | 0   |
| CEU | chr11 | PGA3 | 57553515 | 0   |
| CEU | chr11 | PGA3 | 57603515 | 0   |
| CEU | chr11 | PGA3 | 57653515 | 0   |
| CEU | chr11 | PGA3 | 57703515 | 0   |
| CEU | chr11 | PGA3 | 57753515 | 0   |
| CEU | chr11 | PGA3 | 57803515 | 0   |
| CEU | chr11 | PGA3 | 57853515 | 0   |
| CEU | chr11 | PGA3 | 57903515 | 0   |
| CEU | chr11 | PGA3 | 57953515 | 0   |
| CEU | chr11 | PGA3 | 58003515 | 0   |
| CEU | chr11 | PGA3 | 58053515 | 0   |
| CEU | chr11 | PGA3 | 58103515 | 0   |
| CEU | chr11 | PGA3 | 58153515 | 0   |
| CEU | chr11 | PGA3 | 58203515 | 0   |
| CEU | chr11 | PGA3 | 58253515 | 0   |
| CEU | chr11 | PGA3 | 58303515 | 0   |
| CEU | chr11 | PGA3 | 58353515 | 0   |
| CEU | chr11 | PGA3 | 58403515 | 0   |

## 3\_Introgression\_data

|     |       |      |          |   |
|-----|-------|------|----------|---|
| CEU | chr11 | PGA3 | 58453515 | 0 |
| CEU | chr11 | PGA3 | 58503515 | 0 |
| CEU | chr11 | PGA3 | 58553515 | 0 |
| CEU | chr11 | PGA3 | 58603515 | 0 |
| CEU | chr11 | PGA3 | 58653515 | 0 |
| CEU | chr11 | PGA3 | 58703515 | 0 |
| CEU | chr11 | PGA3 | 58753515 | 0 |
| CEU | chr11 | PGA3 | 58803515 | 0 |
| CEU | chr11 | PGA3 | 58853515 | 0 |
| CEU | chr11 | PGA3 | 58903515 | 0 |
| CEU | chr11 | PGA3 | 58953515 | 0 |
| CEU | chr11 | PGA3 | 59003515 | 0 |
| CEU | chr11 | PGA3 | 59053515 | 0 |
| CEU | chr11 | PGA3 | 59103515 | 0 |
| CEU | chr11 | PGA3 | 59153515 | 0 |
| CEU | chr11 | PGA3 | 59203515 | 0 |
| CEU | chr11 | PGA3 | 59253515 | 0 |
| CEU | chr11 | PGA3 | 59303515 | 0 |
| CEU | chr11 | PGA3 | 59353515 | 0 |
| CEU | chr11 | PGA3 | 59403515 | 0 |
| CEU | chr11 | PGA3 | 59453515 | 0 |
| CEU | chr11 | PGA3 | 59503515 | 0 |
| CEU | chr11 | PGA3 | 59553515 | 0 |
| CEU | chr11 | PGA3 | 59603515 | 0 |
| CEU | chr11 | PGA3 | 59653515 | 0 |
| CEU | chr11 | PGA3 | 59703515 | 0 |
| CEU | chr11 | PGA3 | 59753515 | 0 |
| CEU | chr11 | PGA3 | 59803515 | 0 |
| CEU | chr11 | PGA3 | 59853515 | 0 |
| CEU | chr11 | PGA3 | 59903515 | 0 |
| CEU | chr11 | PGA3 | 59953515 | 0 |
| CEU | chr11 | PGA3 | 60003515 | 0 |
| CEU | chr11 | PGA3 | 60053515 | 0 |
| CEU | chr11 | PGA3 | 60103515 | 0 |
| CEU | chr11 | PGA3 | 60153515 | 0 |
| CEU | chr11 | PGA3 | 60203515 | 0 |
| CEU | chr11 | PGA3 | 60253515 | 0 |
| CEU | chr11 | PGA3 | 60303515 | 0 |
| CEU | chr11 | PGA3 | 60353515 | 0 |
| CEU | chr11 | PGA3 | 60403515 | 0 |
| CEU | chr11 | PGA3 | 60453515 | 0 |
| CEU | chr11 | PGA3 | 60503515 | 0 |
| CEU | chr11 | PGA3 | 60553515 | 0 |
| CEU | chr11 | PGA3 | 60603515 | 0 |
| CEU | chr11 | PGA3 | 60653515 | 0 |
| CEU | chr11 | PGA3 | 60703515 | 0 |
| CEU | chr11 | PGA3 | 60753515 | 0 |
| CEU | chr11 | PGA3 | 60803515 | 0 |
| CEU | chr11 | PGA3 | 60853515 | 0 |

3\_Introgression\_data

|     |       |      |          |    |
|-----|-------|------|----------|----|
| CEU | chr11 | PGA3 | 60903515 | 0  |
| CEU | chr11 | PGA3 | 60953515 | 0  |
| CEU | chr11 | PGA3 | 61003515 | 0  |
| CEU | chr11 | PGA3 | 61053515 | 0  |
| CEU | chr11 | PGA3 | 61103515 | 0  |
| CEU | chr11 | PGA3 | 61153515 | 0  |
| CEU | chr11 | PGA3 | 61203515 | 0  |
| CEU | chr11 | PGA3 | 61253515 | 0  |
| CEU | chr11 | PGA3 | 61303515 | 0  |
| CEU | chr11 | PGA3 | 61353515 | 0  |
| CEU | chr11 | PGA3 | 61403515 | 0  |
| CEU | chr11 | PGA3 | 61453515 | 0  |
| CEU | chr11 | PGA3 | 61503515 | 0  |
| CEU | chr11 | PGA3 | 61553515 | 0  |
| CEU | chr11 | PGA3 | 61603515 | 0  |
| CEU | chr11 | PGA3 | 61653515 | 0  |
| CEU | chr11 | PGA3 | 61703515 | 0  |
| CEU | chr11 | PGA3 | 61753515 | 0  |
| CEU | chr11 | PGA3 | 61803515 | 0  |
| CEU | chr11 | PGA3 | 61853515 | 0  |
| CEU | chr11 | PGA3 | 61903515 | 0  |
| CEU | chr11 | PGA3 | 61953515 | 0  |
| CEU | chr11 | PGA3 | 62003515 | 0  |
| CEU | chr11 | PGA3 | 62053515 | 0  |
| CEU | chr11 | PGA3 | 62103515 | 0  |
| CEU | chr11 | PGA3 | 62153515 | 30 |
| CEU | chr11 | PGA3 | 62203515 | 36 |
| CEU | chr11 | PGA3 | 62253515 | 6  |
| CEU | chr11 | PGA3 | 62303515 | 0  |
| CEU | chr11 | PGA3 | 62353515 | 0  |
| CEU | chr11 | PGA3 | 62403515 | 0  |
| CEU | chr11 | PGA3 | 62453515 | 0  |
| CEU | chr11 | PGA3 | 62503515 | 0  |
| CEU | chr11 | PGA3 | 62553515 | 0  |
| CEU | chr11 | PGA3 | 62603515 | 0  |
| CEU | chr11 | PGA3 | 62653515 | 0  |
| CEU | chr11 | PGA3 | 62703515 | 0  |
| CEU | chr11 | PGA3 | 62753515 | 0  |
| CEU | chr11 | PGA3 | 62803515 | 0  |
| CEU | chr11 | PGA3 | 62853515 | 0  |
| CEU | chr11 | PGA3 | 62903515 | 0  |
| CEU | chr11 | PGA3 | 62953515 | 0  |
| CEU | chr11 | PGA3 | 63003515 | 0  |
| CEU | chr11 | PGA3 | 63053515 | 0  |
| CEU | chr11 | PGA3 | 63103515 | 0  |
| CEU | chr11 | PGA3 | 63153515 | 0  |
| CEU | chr11 | PGA3 | 63203515 | 0  |
| CEU | chr11 | PGA3 | 63253515 | 0  |
| CEU | chr11 | PGA3 | 63303515 | 0  |

## 3\_Introgression\_data

|     |       |      |          |   |
|-----|-------|------|----------|---|
| CEU | chr11 | PGA3 | 63353515 | 0 |
| CEU | chr11 | PGA3 | 63403515 | 0 |
| CEU | chr11 | PGA3 | 63453515 | 0 |
| CEU | chr11 | PGA3 | 63503515 | 0 |
| CEU | chr11 | PGA3 | 63553515 | 0 |
| CEU | chr11 | PGA3 | 63603515 | 0 |
| CEU | chr11 | PGA3 | 63653515 | 0 |
| CEU | chr11 | PGA3 | 63703515 | 0 |
| CEU | chr11 | PGA3 | 63753515 | 0 |
| CEU | chr11 | PGA3 | 63803515 | 0 |
| CEU | chr11 | PGA3 | 63853515 | 0 |
| CEU | chr11 | PGA3 | 63903515 | 0 |
| CEU | chr11 | PGA3 | 63953515 | 0 |
| CEU | chr11 | PGA3 | 64003515 | 0 |
| CEU | chr11 | PGA3 | 64053515 | 0 |
| CEU | chr11 | PGA3 | 64103515 | 0 |
| CEU | chr11 | PGA3 | 64153515 | 0 |
| CEU | chr11 | PGA3 | 64203515 | 0 |
| CEU | chr11 | PGA3 | 64253515 | 0 |
| CEU | chr11 | PGA3 | 64303515 | 0 |
| CEU | chr11 | PGA3 | 64353515 | 0 |
| CEU | chr11 | PGA3 | 64403515 | 0 |
| CEU | chr11 | PGA3 | 64453515 | 0 |
| CEU | chr11 | PGA3 | 64503515 | 0 |
| CEU | chr11 | PGA3 | 64553515 | 0 |
| CEU | chr11 | PGA3 | 64603515 | 0 |
| CEU | chr11 | PGA3 | 64653515 | 0 |
| CEU | chr11 | PGA3 | 64703515 | 0 |
| CEU | chr11 | PGA3 | 64753515 | 0 |
| CEU | chr11 | PGA3 | 64803515 | 0 |
| CEU | chr11 | PGA3 | 64853515 | 0 |
| CEU | chr11 | PGA3 | 64903515 | 0 |
| CEU | chr11 | PGA3 | 64953515 | 0 |
| CEU | chr11 | PGA3 | 65003515 | 0 |
| CEU | chr11 | PGA3 | 65053515 | 0 |
| CEU | chr11 | PGA3 | 65103515 | 0 |
| CEU | chr11 | PGA3 | 65153515 | 0 |
| CEU | chr11 | PGA3 | 65203515 | 0 |
| CEU | chr11 | PGA3 | 65253515 | 0 |
| CEU | chr11 | PGA3 | 65303515 | 0 |
| CEU | chr11 | PGA3 | 65353515 | 0 |
| CEU | chr11 | PGA3 | 65403515 | 0 |
| CEU | chr11 | PGA3 | 65453515 | 0 |
| CEU | chr11 | PGA3 | 65503515 | 0 |
| CEU | chr11 | PGA3 | 65553515 | 0 |
| CEU | chr11 | PGA3 | 65603515 | 0 |
| CEU | chr11 | PGA3 | 65653515 | 0 |
| CEU | chr11 | PGA3 | 65703515 | 0 |
| CEU | chr11 | PGA3 | 65753515 | 0 |

## 3\_Introgression\_data

|     |       |          |          |     |
|-----|-------|----------|----------|-----|
| CEU | chr11 | PGA3     | 65803515 | 0   |
| CEU | chr11 | PGA3     | 65853515 | 0   |
| CEU | chr11 | PGA3     | 65903515 | 0   |
| CEU | chr11 | PGA3     | 65953515 | 0   |
| CEU | chr11 | PGA3     | 66003515 | 0   |
| CEU | chr11 | PGA3     | 66053515 | 0   |
| CEU | chr11 | PGA3     | 66103515 | 0   |
| CEU | chr11 | PGA3     | 66153515 | 0   |
| CEU | chr1  | PRAMEF14 | 8391892  | 0   |
| CEU | chr1  | PRAMEF14 | 8441892  | 0   |
| CEU | chr1  | PRAMEF14 | 8491892  | 0   |
| CEU | chr1  | PRAMEF14 | 8541892  | 0   |
| CEU | chr1  | PRAMEF14 | 8591892  | 0   |
| CEU | chr1  | PRAMEF14 | 8641892  | 0   |
| CEU | chr1  | PRAMEF14 | 8691892  | 0   |
| CEU | chr1  | PRAMEF14 | 8741892  | 0   |
| CEU | chr1  | PRAMEF14 | 8791892  | 0   |
| CEU | chr1  | PRAMEF14 | 8841892  | 0   |
| CEU | chr1  | PRAMEF14 | 8891892  | 0   |
| CEU | chr1  | PRAMEF14 | 8941892  | 0   |
| CEU | chr1  | PRAMEF14 | 8991892  | 0   |
| CEU | chr1  | PRAMEF14 | 9041892  | 0   |
| CEU | chr1  | PRAMEF14 | 9091892  | 0   |
| CEU | chr1  | PRAMEF14 | 9141892  | 0   |
| CEU | chr1  | PRAMEF14 | 9191892  | 0   |
| CEU | chr1  | PRAMEF14 | 9241892  | 0   |
| CEU | chr1  | PRAMEF14 | 9291892  | 0   |
| CEU | chr1  | PRAMEF14 | 9341892  | 0   |
| CEU | chr1  | PRAMEF14 | 9391892  | 0   |
| CEU | chr1  | PRAMEF14 | 9441892  | 0   |
| CEU | chr1  | PRAMEF14 | 9491892  | 0   |
| CEU | chr1  | PRAMEF14 | 9541892  | 0   |
| CEU | chr1  | PRAMEF14 | 9591892  | 0   |
| CEU | chr1  | PRAMEF14 | 9641892  | 0   |
| CEU | chr1  | PRAMEF14 | 9691892  | 0   |
| CEU | chr1  | PRAMEF14 | 9741892  | 0   |
| CEU | chr1  | PRAMEF14 | 9791892  | 0   |
| CEU | chr1  | PRAMEF14 | 9841892  | 0   |
| CEU | chr1  | PRAMEF14 | 9891892  | 0   |
| CEU | chr1  | PRAMEF14 | 9941892  | 2   |
| CEU | chr1  | PRAMEF14 | 9991892  | 19  |
| CEU | chr1  | PRAMEF14 | 10041892 | 36  |
| CEU | chr1  | PRAMEF14 | 10091892 | 34  |
| CEU | chr1  | PRAMEF14 | 10141892 | 34  |
| CEU | chr1  | PRAMEF14 | 10191892 | 76  |
| CEU | chr1  | PRAMEF14 | 10241892 | 108 |
| CEU | chr1  | PRAMEF14 | 10291892 | 112 |
| CEU | chr1  | PRAMEF14 | 10341892 | 105 |
| CEU | chr1  | PRAMEF14 | 10391892 | 71  |

## 3\_Introgression\_data

|     |      |          |          |     |
|-----|------|----------|----------|-----|
| CEU | chr1 | PRAMEF14 | 10441892 | 38  |
| CEU | chr1 | PRAMEF14 | 10491892 | 11  |
| CEU | chr1 | PRAMEF14 | 10541892 | 0   |
| CEU | chr1 | PRAMEF14 | 10591892 | 0   |
| CEU | chr1 | PRAMEF14 | 10641892 | 0   |
| CEU | chr1 | PRAMEF14 | 10691892 | 0   |
| CEU | chr1 | PRAMEF14 | 10741892 | 0   |
| CEU | chr1 | PRAMEF14 | 10791892 | 0   |
| CEU | chr1 | PRAMEF14 | 10841892 | 0   |
| CEU | chr1 | PRAMEF14 | 10891892 | 0   |
| CEU | chr1 | PRAMEF14 | 10941892 | 0   |
| CEU | chr1 | PRAMEF14 | 10991892 | 0   |
| CEU | chr1 | PRAMEF14 | 11041892 | 0   |
| CEU | chr1 | PRAMEF14 | 11091892 | 0   |
| CEU | chr1 | PRAMEF14 | 11141892 | 0   |
| CEU | chr1 | PRAMEF14 | 11191892 | 0   |
| CEU | chr1 | PRAMEF14 | 11241892 | 0   |
| CEU | chr1 | PRAMEF14 | 11291892 | 0   |
| CEU | chr1 | PRAMEF14 | 11341892 | 0   |
| CEU | chr1 | PRAMEF14 | 11391892 | 0   |
| CEU | chr1 | PRAMEF14 | 11441892 | 0   |
| CEU | chr1 | PRAMEF14 | 11491892 | 0   |
| CEU | chr1 | PRAMEF14 | 11541892 | 0   |
| CEU | chr1 | PRAMEF14 | 11591892 | 0   |
| CEU | chr1 | PRAMEF14 | 11641892 | 0   |
| CEU | chr1 | PRAMEF14 | 11691892 | 0   |
| CEU | chr1 | PRAMEF14 | 11741892 | 0   |
| CEU | chr1 | PRAMEF14 | 11791892 | 0   |
| CEU | chr1 | PRAMEF14 | 11841892 | 0   |
| CEU | chr1 | PRAMEF14 | 11891892 | 0   |
| CEU | chr1 | PRAMEF14 | 11941892 | 0   |
| CEU | chr1 | PRAMEF14 | 11991892 | 0   |
| CEU | chr1 | PRAMEF14 | 12041892 | 0   |
| CEU | chr1 | PRAMEF14 | 12091892 | 0   |
| CEU | chr1 | PRAMEF14 | 12141892 | 24  |
| CEU | chr1 | PRAMEF14 | 12191892 | 38  |
| CEU | chr1 | PRAMEF14 | 12241892 | 42  |
| CEU | chr1 | PRAMEF14 | 12291892 | 41  |
| CEU | chr1 | PRAMEF14 | 12341892 | 37  |
| CEU | chr1 | PRAMEF14 | 12391892 | 47  |
| CEU | chr1 | PRAMEF14 | 12441892 | 37  |
| CEU | chr1 | PRAMEF14 | 12491892 | 26  |
| CEU | chr1 | PRAMEF14 | 12541892 | 47  |
| CEU | chr1 | PRAMEF14 | 12591892 | 39  |
| CEU | chr1 | PRAMEF14 | 12641892 | 4   |
| CEU | chr1 | PRAMEF14 | 12691892 | 0   |
| CEU | chr1 | PRAMEF14 | 12741892 | 4   |
| CEU | chr1 | PRAMEF14 | 12791892 | 29  |
| CEU | chr1 | PRAMEF14 | 12841892 | 124 |



## 3\_Introgression\_data

|     |      |          |          |     |
|-----|------|----------|----------|-----|
| CEU | chr1 | PRAMEF14 | 12891892 | 122 |
| CEU | chr1 | PRAMEF14 | 12941892 | 23  |
| CEU | chr1 | PRAMEF14 | 12991892 | 0   |
| CEU | chr1 | PRAMEF14 | 13041892 | 0   |
| CEU | chr1 | PRAMEF14 | 13091892 | 0   |
| CEU | chr1 | PRAMEF14 | 13141892 | 0   |
| CEU | chr1 | PRAMEF14 | 13191892 | 0   |
| CEU | chr1 | PRAMEF14 | 13241892 | 0   |
| CEU | chr1 | PRAMEF14 | 13291892 | 0   |
| CEU | chr1 | PRAMEF14 | 13341892 | 0   |
| CEU | chr1 | PRAMEF14 | 13391892 | 0   |
| CEU | chr1 | PRAMEF14 | 13441892 | 0   |
| CEU | chr1 | PRAMEF14 | 13491892 | 0   |
| CEU | chr1 | PRAMEF14 | 13541892 | 0   |
| CEU | chr1 | PRAMEF14 | 13591892 | 0   |
| CEU | chr1 | PRAMEF14 | 13641892 | 0   |
| CEU | chr1 | PRAMEF14 | 13691892 | 0   |
| CEU | chr1 | PRAMEF14 | 13741892 | 0   |
| CEU | chr1 | PRAMEF14 | 13791892 | 0   |
| CEU | chr1 | PRAMEF14 | 13841892 | 0   |
| CEU | chr1 | PRAMEF14 | 13891892 | 0   |
| CEU | chr1 | PRAMEF14 | 13941892 | 10  |
| CEU | chr1 | PRAMEF14 | 13991892 | 61  |
| CEU | chr1 | PRAMEF14 | 14041892 | 102 |
| CEU | chr1 | PRAMEF14 | 14091892 | 92  |
| CEU | chr1 | PRAMEF14 | 14141892 | 75  |
| CEU | chr1 | PRAMEF14 | 14191892 | 72  |
| CEU | chr1 | PRAMEF14 | 14241892 | 51  |
| CEU | chr1 | PRAMEF14 | 14291892 | 26  |
| CEU | chr1 | PRAMEF14 | 14341892 | 36  |
| CEU | chr1 | PRAMEF14 | 14391892 | 42  |
| CEU | chr1 | PRAMEF14 | 14441892 | 19  |
| CEU | chr1 | PRAMEF14 | 14491892 | 0   |
| CEU | chr1 | PRAMEF14 | 14541892 | 0   |
| CEU | chr1 | PRAMEF14 | 14591892 | 0   |
| CEU | chr1 | PRAMEF14 | 14641892 | 0   |
| CEU | chr1 | PRAMEF14 | 14691892 | 0   |
| CEU | chr1 | PRAMEF14 | 14741892 | 0   |
| CEU | chr1 | PRAMEF14 | 14791892 | 0   |
| CEU | chr1 | PRAMEF14 | 14841892 | 0   |
| CEU | chr1 | PRAMEF14 | 14891892 | 0   |
| CEU | chr1 | PRAMEF14 | 14941892 | 0   |
| CEU | chr1 | PRAMEF14 | 14991892 | 0   |
| CEU | chr1 | PRAMEF14 | 15041892 | 0   |
| CEU | chr1 | PRAMEF14 | 15091892 | 0   |
| CEU | chr1 | PRAMEF14 | 15141892 | 0   |
| CEU | chr1 | PRAMEF14 | 15191892 | 0   |
| CEU | chr1 | PRAMEF14 | 15241892 | 0   |
| CEU | chr1 | PRAMEF14 | 15291892 | 0   |

## 3\_Introgression\_data

|     |      |          |          |    |
|-----|------|----------|----------|----|
| CEU | chr1 | PRAMEF14 | 15341892 | 0  |
| CEU | chr1 | PRAMEF14 | 15391892 | 0  |
| CEU | chr1 | PRAMEF14 | 15441892 | 0  |
| CEU | chr1 | PRAMEF14 | 15491892 | 0  |
| CEU | chr1 | PRAMEF14 | 15541892 | 0  |
| CEU | chr1 | PRAMEF14 | 15591892 | 0  |
| CEU | chr1 | PRAMEF14 | 15641892 | 0  |
| CEU | chr1 | PRAMEF14 | 15691892 | 0  |
| CEU | chr1 | PRAMEF14 | 15741892 | 0  |
| CEU | chr1 | PRAMEF14 | 15791892 | 0  |
| CEU | chr1 | PRAMEF14 | 15841892 | 0  |
| CEU | chr1 | PRAMEF14 | 15891892 | 0  |
| CEU | chr1 | PRAMEF14 | 15941892 | 0  |
| CEU | chr1 | PRAMEF14 | 15991892 | 0  |
| CEU | chr1 | PRAMEF14 | 16041892 | 0  |
| CEU | chr1 | PRAMEF14 | 16091892 | 0  |
| CEU | chr1 | PRAMEF14 | 16141892 | 0  |
| CEU | chr1 | PRAMEF14 | 16191892 | 0  |
| CEU | chr1 | PRAMEF14 | 16241892 | 0  |
| CEU | chr1 | PRAMEF14 | 16291892 | 0  |
| CEU | chr1 | PRAMEF14 | 16341892 | 0  |
| CEU | chr1 | PRAMEF14 | 16391892 | 0  |
| CEU | chr1 | PRAMEF14 | 16441892 | 0  |
| CEU | chr1 | PRAMEF14 | 16491892 | 5  |
| CEU | chr1 | PRAMEF14 | 16541892 | 18 |
| CEU | chr1 | PRAMEF14 | 16591892 | 24 |
| CEU | chr1 | PRAMEF14 | 16641892 | 19 |
| CEU | chr1 | PRAMEF14 | 16691892 | 40 |
| CEU | chr1 | PRAMEF14 | 16741892 | 55 |
| CEU | chr1 | PRAMEF14 | 16791892 | 53 |
| CEU | chr1 | PRAMEF14 | 16841892 | 55 |
| CEU | chr1 | PRAMEF14 | 16891892 | 25 |
| CEU | chr1 | PRAMEF14 | 16941892 | 0  |
| CEU | chr1 | PRAMEF14 | 16991892 | 0  |
| CEU | chr1 | PRAMEF14 | 17041892 | 0  |
| CEU | chr1 | PRAMEF14 | 17091892 | 0  |
| CEU | chr1 | PRAMEF14 | 17141892 | 0  |
| CEU | chr1 | PRAMEF14 | 17191892 | 0  |
| CEU | chr1 | PRAMEF14 | 17241892 | 0  |
| CEU | chr1 | PRAMEF14 | 17291892 | 0  |
| CEU | chr1 | PRAMEF14 | 17341892 | 0  |
| CEU | chr1 | PRAMEF14 | 17391892 | 0  |
| CEU | chr1 | PRAMEF14 | 17441892 | 0  |
| CEU | chr1 | PRAMEF14 | 17491892 | 0  |
| CEU | chr1 | PRAMEF14 | 17541892 | 0  |
| CEU | chr1 | PRAMEF14 | 17591892 | 0  |
| CEU | chr1 | PRAMEF14 | 17641892 | 0  |
| CEU | chr1 | PRAMEF14 | 17691892 | 0  |
| CEU | chr1 | PRAMEF14 | 17741892 | 0  |

### 3\_Introgression\_data

|     |      |          |          |     |
|-----|------|----------|----------|-----|
| CEU | chr1 | PRAMEF14 | 17791892 | 0   |
| CEU | chr1 | PRAMEF14 | 17841892 | 0   |
| CEU | chr1 | PRAMEF14 | 17891892 | 0   |
| CEU | chr1 | PRAMEF14 | 17941892 | 0   |
| CEU | chr1 | PRAMEF14 | 17991892 | 0   |
| CEU | chr1 | PRAMEF14 | 18041892 | 0   |
| CEU | chr1 | PRAMEF14 | 18091892 | 0   |
| CEU | chr1 | PRAMEF14 | 18141892 | 0   |
| CEU | chr1 | PRAMEF14 | 18191892 | 0   |
| CEU | chr1 | PRAMEF14 | 18241892 | 0   |
| CEU | chr1 | PRAMEF14 | 18291892 | 0   |
| CEU | chr1 | PRAMEF20 | 8460450  | 0   |
| CEU | chr1 | PRAMEF20 | 8510450  | 0   |
| CEU | chr1 | PRAMEF20 | 8560450  | 0   |
| CEU | chr1 | PRAMEF20 | 8610450  | 0   |
| CEU | chr1 | PRAMEF20 | 8660450  | 0   |
| CEU | chr1 | PRAMEF20 | 8710450  | 0   |
| CEU | chr1 | PRAMEF20 | 8760450  | 0   |
| CEU | chr1 | PRAMEF20 | 8810450  | 0   |
| CEU | chr1 | PRAMEF20 | 8860450  | 0   |
| CEU | chr1 | PRAMEF20 | 8910450  | 0   |
| CEU | chr1 | PRAMEF20 | 8960450  | 0   |
| CEU | chr1 | PRAMEF20 | 9010450  | 0   |
| CEU | chr1 | PRAMEF20 | 9060450  | 0   |
| CEU | chr1 | PRAMEF20 | 9110450  | 0   |
| CEU | chr1 | PRAMEF20 | 9160450  | 0   |
| CEU | chr1 | PRAMEF20 | 9210450  | 0   |
| CEU | chr1 | PRAMEF20 | 9260450  | 0   |
| CEU | chr1 | PRAMEF20 | 9310450  | 0   |
| CEU | chr1 | PRAMEF20 | 9360450  | 0   |
| CEU | chr1 | PRAMEF20 | 9410450  | 0   |
| CEU | chr1 | PRAMEF20 | 9460450  | 0   |
| CEU | chr1 | PRAMEF20 | 9510450  | 0   |
| CEU | chr1 | PRAMEF20 | 9560450  | 0   |
| CEU | chr1 | PRAMEF20 | 9610450  | 0   |
| CEU | chr1 | PRAMEF20 | 9660450  | 0   |
| CEU | chr1 | PRAMEF20 | 9710450  | 0   |
| CEU | chr1 | PRAMEF20 | 9760450  | 0   |
| CEU | chr1 | PRAMEF20 | 9810450  | 0   |
| CEU | chr1 | PRAMEF20 | 9860450  | 0   |
| CEU | chr1 | PRAMEF20 | 9910450  | 0   |
| CEU | chr1 | PRAMEF20 | 9960450  | 5   |
| CEU | chr1 | PRAMEF20 | 10010450 | 25  |
| CEU | chr1 | PRAMEF20 | 10060450 | 42  |
| CEU | chr1 | PRAMEF20 | 10110450 | 31  |
| CEU | chr1 | PRAMEF20 | 10160450 | 52  |
| CEU | chr1 | PRAMEF20 | 10210450 | 85  |
| CEU | chr1 | PRAMEF20 | 10260450 | 102 |
| CEU | chr1 | PRAMEF20 | 10310450 | 117 |

## 3\_Introgression\_data

|     |      |          |          |     |
|-----|------|----------|----------|-----|
| CEU | chr1 | PRAMEF20 | 10360450 | 102 |
| CEU | chr1 | PRAMEF20 | 10410450 | 61  |
| CEU | chr1 | PRAMEF20 | 10460450 | 20  |
| CEU | chr1 | PRAMEF20 | 10510450 | 4   |
| CEU | chr1 | PRAMEF20 | 10560450 | 0   |
| CEU | chr1 | PRAMEF20 | 10610450 | 0   |
| CEU | chr1 | PRAMEF20 | 10660450 | 0   |
| CEU | chr1 | PRAMEF20 | 10710450 | 0   |
| CEU | chr1 | PRAMEF20 | 10760450 | 0   |
| CEU | chr1 | PRAMEF20 | 10810450 | 0   |
| CEU | chr1 | PRAMEF20 | 10860450 | 0   |
| CEU | chr1 | PRAMEF20 | 10910450 | 0   |
| CEU | chr1 | PRAMEF20 | 10960450 | 0   |
| CEU | chr1 | PRAMEF20 | 11010450 | 0   |
| CEU | chr1 | PRAMEF20 | 11060450 | 0   |
| CEU | chr1 | PRAMEF20 | 11110450 | 0   |
| CEU | chr1 | PRAMEF20 | 11160450 | 0   |
| CEU | chr1 | PRAMEF20 | 11210450 | 0   |
| CEU | chr1 | PRAMEF20 | 11260450 | 0   |
| CEU | chr1 | PRAMEF20 | 11310450 | 0   |
| CEU | chr1 | PRAMEF20 | 11360450 | 0   |
| CEU | chr1 | PRAMEF20 | 11410450 | 0   |
| CEU | chr1 | PRAMEF20 | 11460450 | 0   |
| CEU | chr1 | PRAMEF20 | 11510450 | 0   |
| CEU | chr1 | PRAMEF20 | 11560450 | 0   |
| CEU | chr1 | PRAMEF20 | 11610450 | 0   |
| CEU | chr1 | PRAMEF20 | 11660450 | 0   |
| CEU | chr1 | PRAMEF20 | 11710450 | 0   |
| CEU | chr1 | PRAMEF20 | 11760450 | 0   |
| CEU | chr1 | PRAMEF20 | 11810450 | 0   |
| CEU | chr1 | PRAMEF20 | 11860450 | 0   |
| CEU | chr1 | PRAMEF20 | 11910450 | 0   |
| CEU | chr1 | PRAMEF20 | 11960450 | 0   |
| CEU | chr1 | PRAMEF20 | 12010450 | 0   |
| CEU | chr1 | PRAMEF20 | 12060450 | 0   |
| CEU | chr1 | PRAMEF20 | 12110450 | 2   |
| CEU | chr1 | PRAMEF20 | 12160450 | 25  |
| CEU | chr1 | PRAMEF20 | 12210450 | 45  |
| CEU | chr1 | PRAMEF20 | 12260450 | 46  |
| CEU | chr1 | PRAMEF20 | 12310450 | 42  |
| CEU | chr1 | PRAMEF20 | 12360450 | 38  |
| CEU | chr1 | PRAMEF20 | 12410450 | 44  |
| CEU | chr1 | PRAMEF20 | 12460450 | 35  |
| CEU | chr1 | PRAMEF20 | 12510450 | 25  |
| CEU | chr1 | PRAMEF20 | 12560450 | 47  |
| CEU | chr1 | PRAMEF20 | 12610450 | 33  |
| CEU | chr1 | PRAMEF20 | 12660450 | 0   |
| CEU | chr1 | PRAMEF20 | 12710450 | 0   |
| CEU | chr1 | PRAMEF20 | 12760450 | 11  |

## 3\_Introgression\_data

|     |      |          |          |     |
|-----|------|----------|----------|-----|
| CEU | chr1 | PRAMEF20 | 12810450 | 31  |
| CEU | chr1 | PRAMEF20 | 12860450 | 130 |
| CEU | chr1 | PRAMEF20 | 12910450 | 120 |
| CEU | chr1 | PRAMEF20 | 12960450 | 10  |
| CEU | chr1 | PRAMEF20 | 13010450 | 0   |
| CEU | chr1 | PRAMEF20 | 13060450 | 0   |
| CEU | chr1 | PRAMEF20 | 13110450 | 0   |
| CEU | chr1 | PRAMEF20 | 13160450 | 0   |
| CEU | chr1 | PRAMEF20 | 13210450 | 0   |
| CEU | chr1 | PRAMEF20 | 13260450 | 0   |
| CEU | chr1 | PRAMEF20 | 13310450 | 0   |
| CEU | chr1 | PRAMEF20 | 13360450 | 0   |
| CEU | chr1 | PRAMEF20 | 13410450 | 0   |
| CEU | chr1 | PRAMEF20 | 13460450 | 0   |
| CEU | chr1 | PRAMEF20 | 13510450 | 0   |
| CEU | chr1 | PRAMEF20 | 13560450 | 0   |
| CEU | chr1 | PRAMEF20 | 13610450 | 0   |
| CEU | chr1 | PRAMEF20 | 13660450 | 0   |
| CEU | chr1 | PRAMEF20 | 13710450 | 0   |
| CEU | chr1 | PRAMEF20 | 13760450 | 0   |
| CEU | chr1 | PRAMEF20 | 13810450 | 0   |
| CEU | chr1 | PRAMEF20 | 13860450 | 0   |
| CEU | chr1 | PRAMEF20 | 13910450 | 4   |
| CEU | chr1 | PRAMEF20 | 13960450 | 29  |
| CEU | chr1 | PRAMEF20 | 14010450 | 79  |
| CEU | chr1 | PRAMEF20 | 14060450 | 104 |
| CEU | chr1 | PRAMEF20 | 14110450 | 85  |
| CEU | chr1 | PRAMEF20 | 14160450 | 72  |
| CEU | chr1 | PRAMEF20 | 14210450 | 64  |
| CEU | chr1 | PRAMEF20 | 14260450 | 36  |
| CEU | chr1 | PRAMEF20 | 14310450 | 23  |
| CEU | chr1 | PRAMEF20 | 14360450 | 40  |
| CEU | chr1 | PRAMEF20 | 14410450 | 38  |
| CEU | chr1 | PRAMEF20 | 14460450 | 12  |
| CEU | chr1 | PRAMEF20 | 14510450 | 0   |
| CEU | chr1 | PRAMEF20 | 14560450 | 0   |
| CEU | chr1 | PRAMEF20 | 14610450 | 0   |
| CEU | chr1 | PRAMEF20 | 14660450 | 0   |
| CEU | chr1 | PRAMEF20 | 14710450 | 0   |
| CEU | chr1 | PRAMEF20 | 14760450 | 0   |
| CEU | chr1 | PRAMEF20 | 14810450 | 0   |
| CEU | chr1 | PRAMEF20 | 14860450 | 0   |
| CEU | chr1 | PRAMEF20 | 14910450 | 0   |
| CEU | chr1 | PRAMEF20 | 14960450 | 0   |
| CEU | chr1 | PRAMEF20 | 15010450 | 0   |
| CEU | chr1 | PRAMEF20 | 15060450 | 0   |
| CEU | chr1 | PRAMEF20 | 15110450 | 0   |
| CEU | chr1 | PRAMEF20 | 15160450 | 0   |
| CEU | chr1 | PRAMEF20 | 15210450 | 0   |

### 3\_Introgression\_data

|     |      |          |          |    |
|-----|------|----------|----------|----|
| CEU | chr1 | PRAMEF20 | 15260450 | 0  |
| CEU | chr1 | PRAMEF20 | 15310450 | 0  |
| CEU | chr1 | PRAMEF20 | 15360450 | 0  |
| CEU | chr1 | PRAMEF20 | 15410450 | 0  |
| CEU | chr1 | PRAMEF20 | 15460450 | 0  |
| CEU | chr1 | PRAMEF20 | 15510450 | 0  |
| CEU | chr1 | PRAMEF20 | 15560450 | 0  |
| CEU | chr1 | PRAMEF20 | 15610450 | 0  |
| CEU | chr1 | PRAMEF20 | 15660450 | 0  |
| CEU | chr1 | PRAMEF20 | 15710450 | 0  |
| CEU | chr1 | PRAMEF20 | 15760450 | 0  |
| CEU | chr1 | PRAMEF20 | 15810450 | 0  |
| CEU | chr1 | PRAMEF20 | 15860450 | 0  |
| CEU | chr1 | PRAMEF20 | 15910450 | 0  |
| CEU | chr1 | PRAMEF20 | 15960450 | 0  |
| CEU | chr1 | PRAMEF20 | 16010450 | 0  |
| CEU | chr1 | PRAMEF20 | 16060450 | 0  |
| CEU | chr1 | PRAMEF20 | 16110450 | 0  |
| CEU | chr1 | PRAMEF20 | 16160450 | 0  |
| CEU | chr1 | PRAMEF20 | 16210450 | 0  |
| CEU | chr1 | PRAMEF20 | 16260450 | 0  |
| CEU | chr1 | PRAMEF20 | 16310450 | 0  |
| CEU | chr1 | PRAMEF20 | 16360450 | 0  |
| CEU | chr1 | PRAMEF20 | 16410450 | 0  |
| CEU | chr1 | PRAMEF20 | 16460450 | 0  |
| CEU | chr1 | PRAMEF20 | 16510450 | 12 |
| CEU | chr1 | PRAMEF20 | 16560450 | 25 |
| CEU | chr1 | PRAMEF20 | 16610450 | 20 |
| CEU | chr1 | PRAMEF20 | 16660450 | 24 |
| CEU | chr1 | PRAMEF20 | 16710450 | 42 |
| CEU | chr1 | PRAMEF20 | 16760450 | 61 |
| CEU | chr1 | PRAMEF20 | 16810450 | 67 |
| CEU | chr1 | PRAMEF20 | 16860450 | 37 |
| CEU | chr1 | PRAMEF20 | 16910450 | 6  |
| CEU | chr1 | PRAMEF20 | 16960450 | 0  |
| CEU | chr1 | PRAMEF20 | 17010450 | 0  |
| CEU | chr1 | PRAMEF20 | 17060450 | 0  |
| CEU | chr1 | PRAMEF20 | 17110450 | 0  |
| CEU | chr1 | PRAMEF20 | 17160450 | 0  |
| CEU | chr1 | PRAMEF20 | 17210450 | 0  |
| CEU | chr1 | PRAMEF20 | 17260450 | 0  |
| CEU | chr1 | PRAMEF20 | 17310450 | 0  |
| CEU | chr1 | PRAMEF20 | 17360450 | 0  |
| CEU | chr1 | PRAMEF20 | 17410450 | 0  |
| CEU | chr1 | PRAMEF20 | 17460450 | 0  |
| CEU | chr1 | PRAMEF20 | 17510450 | 0  |
| CEU | chr1 | PRAMEF20 | 17560450 | 0  |
| CEU | chr1 | PRAMEF20 | 17610450 | 0  |
| CEU | chr1 | PRAMEF20 | 17660450 | 0  |

3\_Introgression\_data

|     |      |          |          |    |
|-----|------|----------|----------|----|
| CEU | chr1 | PRAMEF20 | 17710450 | 0  |
| CEU | chr1 | PRAMEF20 | 17760450 | 0  |
| CEU | chr1 | PRAMEF20 | 17810450 | 0  |
| CEU | chr1 | PRAMEF20 | 17860450 | 0  |
| CEU | chr1 | PRAMEF20 | 17910450 | 0  |
| CEU | chr1 | PRAMEF20 | 17960450 | 0  |
| CEU | chr1 | PRAMEF20 | 18010450 | 0  |
| CEU | chr1 | PRAMEF20 | 18060450 | 0  |
| CEU | chr1 | PRAMEF20 | 18110450 | 0  |
| CEU | chr1 | PRAMEF20 | 18160450 | 0  |
| CEU | chr1 | PRAMEF20 | 18210450 | 0  |
| CEU | chr1 | PRAMEF20 | 18260450 | 0  |
| CEU | chr1 | PRAMEF20 | 18310450 | 0  |
| CEU | chr1 | PRAMEF20 | 18360450 | 16 |
| CEU | chr1 | PRAMEF5  | 8304198  | 0  |
| CEU | chr1 | PRAMEF5  | 8354198  | 0  |
| CEU | chr1 | PRAMEF5  | 8404198  | 0  |
| CEU | chr1 | PRAMEF5  | 8454198  | 0  |
| CEU | chr1 | PRAMEF5  | 8504198  | 0  |
| CEU | chr1 | PRAMEF5  | 8554198  | 0  |
| CEU | chr1 | PRAMEF5  | 8604198  | 0  |
| CEU | chr1 | PRAMEF5  | 8654198  | 0  |
| CEU | chr1 | PRAMEF5  | 8704198  | 0  |
| CEU | chr1 | PRAMEF5  | 8754198  | 0  |
| CEU | chr1 | PRAMEF5  | 8804198  | 0  |
| CEU | chr1 | PRAMEF5  | 8854198  | 0  |
| CEU | chr1 | PRAMEF5  | 8904198  | 0  |
| CEU | chr1 | PRAMEF5  | 8954198  | 0  |
| CEU | chr1 | PRAMEF5  | 9004198  | 0  |
| CEU | chr1 | PRAMEF5  | 9054198  | 0  |
| CEU | chr1 | PRAMEF5  | 9104198  | 0  |
| CEU | chr1 | PRAMEF5  | 9154198  | 0  |
| CEU | chr1 | PRAMEF5  | 9204198  | 0  |
| CEU | chr1 | PRAMEF5  | 9254198  | 0  |
| CEU | chr1 | PRAMEF5  | 9304198  | 0  |
| CEU | chr1 | PRAMEF5  | 9354198  | 0  |
| CEU | chr1 | PRAMEF5  | 9404198  | 0  |
| CEU | chr1 | PRAMEF5  | 9454198  | 0  |
| CEU | chr1 | PRAMEF5  | 9504198  | 0  |
| CEU | chr1 | PRAMEF5  | 9554198  | 0  |
| CEU | chr1 | PRAMEF5  | 9604198  | 0  |
| CEU | chr1 | PRAMEF5  | 9654198  | 0  |
| CEU | chr1 | PRAMEF5  | 9704198  | 0  |
| CEU | chr1 | PRAMEF5  | 9754198  | 0  |
| CEU | chr1 | PRAMEF5  | 9804198  | 0  |
| CEU | chr1 | PRAMEF5  | 9854198  | 0  |
| CEU | chr1 | PRAMEF5  | 9904198  | 0  |
| CEU | chr1 | PRAMEF5  | 9954198  | 2  |
| CEU | chr1 | PRAMEF5  | 10004198 | 23 |

## 3\_Introgression\_data

|     |      |         |          |     |
|-----|------|---------|----------|-----|
| CEU | chr1 | PRAMEF5 | 10054198 | 43  |
| CEU | chr1 | PRAMEF5 | 10104198 | 32  |
| CEU | chr1 | PRAMEF5 | 10154198 | 46  |
| CEU | chr1 | PRAMEF5 | 10204198 | 83  |
| CEU | chr1 | PRAMEF5 | 10254198 | 101 |
| CEU | chr1 | PRAMEF5 | 10304198 | 115 |
| CEU | chr1 | PRAMEF5 | 10354198 | 106 |
| CEU | chr1 | PRAMEF5 | 10404198 | 64  |
| CEU | chr1 | PRAMEF5 | 10454198 | 25  |
| CEU | chr1 | PRAMEF5 | 10504198 | 6   |
| CEU | chr1 | PRAMEF5 | 10554198 | 0   |
| CEU | chr1 | PRAMEF5 | 10604198 | 0   |
| CEU | chr1 | PRAMEF5 | 10654198 | 0   |
| CEU | chr1 | PRAMEF5 | 10704198 | 0   |
| CEU | chr1 | PRAMEF5 | 10754198 | 0   |
| CEU | chr1 | PRAMEF5 | 10804198 | 0   |
| CEU | chr1 | PRAMEF5 | 10854198 | 0   |
| CEU | chr1 | PRAMEF5 | 10904198 | 0   |
| CEU | chr1 | PRAMEF5 | 10954198 | 0   |
| CEU | chr1 | PRAMEF5 | 11004198 | 0   |
| CEU | chr1 | PRAMEF5 | 11054198 | 0   |
| CEU | chr1 | PRAMEF5 | 11104198 | 0   |
| CEU | chr1 | PRAMEF5 | 11154198 | 0   |
| CEU | chr1 | PRAMEF5 | 11204198 | 0   |
| CEU | chr1 | PRAMEF5 | 11254198 | 0   |
| CEU | chr1 | PRAMEF5 | 11304198 | 0   |
| CEU | chr1 | PRAMEF5 | 11354198 | 0   |
| CEU | chr1 | PRAMEF5 | 11404198 | 0   |
| CEU | chr1 | PRAMEF5 | 11454198 | 0   |
| CEU | chr1 | PRAMEF5 | 11504198 | 0   |
| CEU | chr1 | PRAMEF5 | 11554198 | 0   |
| CEU | chr1 | PRAMEF5 | 11604198 | 0   |
| CEU | chr1 | PRAMEF5 | 11654198 | 0   |
| CEU | chr1 | PRAMEF5 | 11704198 | 0   |
| CEU | chr1 | PRAMEF5 | 11754198 | 0   |
| CEU | chr1 | PRAMEF5 | 11804198 | 0   |
| CEU | chr1 | PRAMEF5 | 11854198 | 0   |
| CEU | chr1 | PRAMEF5 | 11904198 | 0   |
| CEU | chr1 | PRAMEF5 | 11954198 | 0   |
| CEU | chr1 | PRAMEF5 | 12004198 | 0   |
| CEU | chr1 | PRAMEF5 | 12054198 | 0   |
| CEU | chr1 | PRAMEF5 | 12104198 | 0   |
| CEU | chr1 | PRAMEF5 | 12154198 | 24  |
| CEU | chr1 | PRAMEF5 | 12204198 | 45  |
| CEU | chr1 | PRAMEF5 | 12254198 | 46  |
| CEU | chr1 | PRAMEF5 | 12304198 | 43  |
| CEU | chr1 | PRAMEF5 | 12354198 | 37  |
| CEU | chr1 | PRAMEF5 | 12404198 | 42  |
| CEU | chr1 | PRAMEF5 | 12454198 | 36  |



## 3\_Introgression\_data

|     |      |         |          |     |
|-----|------|---------|----------|-----|
| CEU | chr1 | PRAMEF5 | 12504198 | 25  |
| CEU | chr1 | PRAMEF5 | 12554198 | 48  |
| CEU | chr1 | PRAMEF5 | 12604198 | 36  |
| CEU | chr1 | PRAMEF5 | 12654198 | 0   |
| CEU | chr1 | PRAMEF5 | 12704198 | 0   |
| CEU | chr1 | PRAMEF5 | 12754198 | 8   |
| CEU | chr1 | PRAMEF5 | 12804198 | 29  |
| CEU | chr1 | PRAMEF5 | 12854198 | 128 |
| CEU | chr1 | PRAMEF5 | 12904198 | 122 |
| CEU | chr1 | PRAMEF5 | 12954198 | 15  |
| CEU | chr1 | PRAMEF5 | 13004198 | 0   |
| CEU | chr1 | PRAMEF5 | 13054198 | 0   |
| CEU | chr1 | PRAMEF5 | 13104198 | 0   |
| CEU | chr1 | PRAMEF5 | 13154198 | 0   |
| CEU | chr1 | PRAMEF5 | 13204198 | 0   |
| CEU | chr1 | PRAMEF5 | 13254198 | 0   |
| CEU | chr1 | PRAMEF5 | 13304198 | 0   |
| CEU | chr1 | PRAMEF5 | 13354198 | 0   |
| CEU | chr1 | PRAMEF5 | 13404198 | 0   |
| CEU | chr1 | PRAMEF5 | 13454198 | 0   |
| CEU | chr1 | PRAMEF5 | 13504198 | 0   |
| CEU | chr1 | PRAMEF5 | 13554198 | 0   |
| CEU | chr1 | PRAMEF5 | 13604198 | 0   |
| CEU | chr1 | PRAMEF5 | 13654198 | 0   |
| CEU | chr1 | PRAMEF5 | 13704198 | 0   |
| CEU | chr1 | PRAMEF5 | 13754198 | 0   |
| CEU | chr1 | PRAMEF5 | 13804198 | 0   |
| CEU | chr1 | PRAMEF5 | 13854198 | 0   |
| CEU | chr1 | PRAMEF5 | 13904198 | 1   |
| CEU | chr1 | PRAMEF5 | 13954198 | 22  |
| CEU | chr1 | PRAMEF5 | 14004198 | 75  |
| CEU | chr1 | PRAMEF5 | 14054198 | 100 |
| CEU | chr1 | PRAMEF5 | 14104198 | 92  |
| CEU | chr1 | PRAMEF5 | 14154198 | 78  |
| CEU | chr1 | PRAMEF5 | 14204198 | 61  |
| CEU | chr1 | PRAMEF5 | 14254198 | 41  |
| CEU | chr1 | PRAMEF5 | 14304198 | 23  |
| CEU | chr1 | PRAMEF5 | 14354198 | 36  |
| CEU | chr1 | PRAMEF5 | 14404198 | 41  |
| CEU | chr1 | PRAMEF5 | 14454198 | 16  |
| CEU | chr1 | PRAMEF5 | 14504198 | 0   |
| CEU | chr1 | PRAMEF5 | 14554198 | 0   |
| CEU | chr1 | PRAMEF5 | 14604198 | 0   |
| CEU | chr1 | PRAMEF5 | 14654198 | 0   |
| CEU | chr1 | PRAMEF5 | 14704198 | 0   |
| CEU | chr1 | PRAMEF5 | 14754198 | 0   |
| CEU | chr1 | PRAMEF5 | 14804198 | 0   |
| CEU | chr1 | PRAMEF5 | 14854198 | 0   |
| CEU | chr1 | PRAMEF5 | 14904198 | 0   |

### 3\_Introgression\_data

|     |      |         |          |    |
|-----|------|---------|----------|----|
| CEU | chr1 | PRAMEF5 | 14954198 | 0  |
| CEU | chr1 | PRAMEF5 | 15004198 | 0  |
| CEU | chr1 | PRAMEF5 | 15054198 | 0  |
| CEU | chr1 | PRAMEF5 | 15104198 | 0  |
| CEU | chr1 | PRAMEF5 | 15154198 | 0  |
| CEU | chr1 | PRAMEF5 | 15204198 | 0  |
| CEU | chr1 | PRAMEF5 | 15254198 | 0  |
| CEU | chr1 | PRAMEF5 | 15304198 | 0  |
| CEU | chr1 | PRAMEF5 | 15354198 | 0  |
| CEU | chr1 | PRAMEF5 | 15404198 | 0  |
| CEU | chr1 | PRAMEF5 | 15454198 | 0  |
| CEU | chr1 | PRAMEF5 | 15504198 | 0  |
| CEU | chr1 | PRAMEF5 | 15554198 | 0  |
| CEU | chr1 | PRAMEF5 | 15604198 | 0  |
| CEU | chr1 | PRAMEF5 | 15654198 | 0  |
| CEU | chr1 | PRAMEF5 | 15704198 | 0  |
| CEU | chr1 | PRAMEF5 | 15754198 | 0  |
| CEU | chr1 | PRAMEF5 | 15804198 | 0  |
| CEU | chr1 | PRAMEF5 | 15854198 | 0  |
| CEU | chr1 | PRAMEF5 | 15904198 | 0  |
| CEU | chr1 | PRAMEF5 | 15954198 | 0  |
| CEU | chr1 | PRAMEF5 | 16004198 | 0  |
| CEU | chr1 | PRAMEF5 | 16054198 | 0  |
| CEU | chr1 | PRAMEF5 | 16104198 | 0  |
| CEU | chr1 | PRAMEF5 | 16154198 | 0  |
| CEU | chr1 | PRAMEF5 | 16204198 | 0  |
| CEU | chr1 | PRAMEF5 | 16254198 | 0  |
| CEU | chr1 | PRAMEF5 | 16304198 | 0  |
| CEU | chr1 | PRAMEF5 | 16354198 | 0  |
| CEU | chr1 | PRAMEF5 | 16404198 | 0  |
| CEU | chr1 | PRAMEF5 | 16454198 | 0  |
| CEU | chr1 | PRAMEF5 | 16504198 | 11 |
| CEU | chr1 | PRAMEF5 | 16554198 | 22 |
| CEU | chr1 | PRAMEF5 | 16604198 | 20 |
| CEU | chr1 | PRAMEF5 | 16654198 | 23 |
| CEU | chr1 | PRAMEF5 | 16704198 | 40 |
| CEU | chr1 | PRAMEF5 | 16754198 | 58 |
| CEU | chr1 | PRAMEF5 | 16804198 | 63 |
| CEU | chr1 | PRAMEF5 | 16854198 | 44 |
| CEU | chr1 | PRAMEF5 | 16904198 | 13 |
| CEU | chr1 | PRAMEF5 | 16954198 | 0  |
| CEU | chr1 | PRAMEF5 | 17004198 | 0  |
| CEU | chr1 | PRAMEF5 | 17054198 | 0  |
| CEU | chr1 | PRAMEF5 | 17104198 | 0  |
| CEU | chr1 | PRAMEF5 | 17154198 | 0  |
| CEU | chr1 | PRAMEF5 | 17204198 | 0  |
| CEU | chr1 | PRAMEF5 | 17254198 | 0  |
| CEU | chr1 | PRAMEF5 | 17304198 | 0  |
| CEU | chr1 | PRAMEF5 | 17354198 | 0  |

## 3\_Introgression\_data

|     |      |         |          |   |
|-----|------|---------|----------|---|
| CEU | chr1 | PRAMEF5 | 17404198 | 0 |
| CEU | chr1 | PRAMEF5 | 17454198 | 0 |
| CEU | chr1 | PRAMEF5 | 17504198 | 0 |
| CEU | chr1 | PRAMEF5 | 17554198 | 0 |
| CEU | chr1 | PRAMEF5 | 17604198 | 0 |
| CEU | chr1 | PRAMEF5 | 17654198 | 0 |
| CEU | chr1 | PRAMEF5 | 17704198 | 0 |
| CEU | chr1 | PRAMEF5 | 17754198 | 0 |
| CEU | chr1 | PRAMEF5 | 17804198 | 0 |
| CEU | chr1 | PRAMEF5 | 17854198 | 0 |
| CEU | chr1 | PRAMEF5 | 17904198 | 0 |
| CEU | chr1 | PRAMEF5 | 17954198 | 0 |
| CEU | chr1 | PRAMEF5 | 18004198 | 0 |
| CEU | chr1 | PRAMEF5 | 18054198 | 0 |
| CEU | chr1 | PRAMEF5 | 18104198 | 0 |
| CEU | chr1 | PRAMEF5 | 18154198 | 0 |
| CEU | chr1 | PRAMEF5 | 18204198 | 0 |
| CEU | chr1 | PRAMEF8 | 8331223  | 0 |
| CEU | chr1 | PRAMEF8 | 8381223  | 0 |
| CEU | chr1 | PRAMEF8 | 8431223  | 0 |
| CEU | chr1 | PRAMEF8 | 8481223  | 0 |
| CEU | chr1 | PRAMEF8 | 8531223  | 0 |
| CEU | chr1 | PRAMEF8 | 8581223  | 0 |
| CEU | chr1 | PRAMEF8 | 8631223  | 0 |
| CEU | chr1 | PRAMEF8 | 8681223  | 0 |
| CEU | chr1 | PRAMEF8 | 8731223  | 0 |
| CEU | chr1 | PRAMEF8 | 8781223  | 0 |
| CEU | chr1 | PRAMEF8 | 8831223  | 0 |
| CEU | chr1 | PRAMEF8 | 8881223  | 0 |
| CEU | chr1 | PRAMEF8 | 8931223  | 0 |
| CEU | chr1 | PRAMEF8 | 8981223  | 0 |
| CEU | chr1 | PRAMEF8 | 9031223  | 0 |
| CEU | chr1 | PRAMEF8 | 9081223  | 0 |
| CEU | chr1 | PRAMEF8 | 9131223  | 0 |
| CEU | chr1 | PRAMEF8 | 9181223  | 0 |
| CEU | chr1 | PRAMEF8 | 9231223  | 0 |
| CEU | chr1 | PRAMEF8 | 9281223  | 0 |
| CEU | chr1 | PRAMEF8 | 9331223  | 0 |
| CEU | chr1 | PRAMEF8 | 9381223  | 0 |
| CEU | chr1 | PRAMEF8 | 9431223  | 0 |
| CEU | chr1 | PRAMEF8 | 9481223  | 0 |
| CEU | chr1 | PRAMEF8 | 9531223  | 0 |
| CEU | chr1 | PRAMEF8 | 9581223  | 0 |
| CEU | chr1 | PRAMEF8 | 9631223  | 0 |
| CEU | chr1 | PRAMEF8 | 9681223  | 0 |
| CEU | chr1 | PRAMEF8 | 9731223  | 0 |
| CEU | chr1 | PRAMEF8 | 9781223  | 0 |
| CEU | chr1 | PRAMEF8 | 9831223  | 0 |
| CEU | chr1 | PRAMEF8 | 9881223  | 0 |

## 3\_Introgression\_data

|     |      |         |          |     |
|-----|------|---------|----------|-----|
| CEU | chr1 | PRAMEF8 | 9931223  | 0   |
| CEU | chr1 | PRAMEF8 | 9981223  | 14  |
| CEU | chr1 | PRAMEF8 | 10031223 | 35  |
| CEU | chr1 | PRAMEF8 | 10081223 | 39  |
| CEU | chr1 | PRAMEF8 | 10131223 | 28  |
| CEU | chr1 | PRAMEF8 | 10181223 | 75  |
| CEU | chr1 | PRAMEF8 | 10231223 | 108 |
| CEU | chr1 | PRAMEF8 | 10281223 | 103 |
| CEU | chr1 | PRAMEF8 | 10331223 | 111 |
| CEU | chr1 | PRAMEF8 | 10381223 | 78  |
| CEU | chr1 | PRAMEF8 | 10431223 | 40  |
| CEU | chr1 | PRAMEF8 | 10481223 | 14  |
| CEU | chr1 | PRAMEF8 | 10531223 | 1   |
| CEU | chr1 | PRAMEF8 | 10581223 | 0   |
| CEU | chr1 | PRAMEF8 | 10631223 | 0   |
| CEU | chr1 | PRAMEF8 | 10681223 | 0   |
| CEU | chr1 | PRAMEF8 | 10731223 | 0   |
| CEU | chr1 | PRAMEF8 | 10781223 | 0   |
| CEU | chr1 | PRAMEF8 | 10831223 | 0   |
| CEU | chr1 | PRAMEF8 | 10881223 | 0   |
| CEU | chr1 | PRAMEF8 | 10931223 | 0   |
| CEU | chr1 | PRAMEF8 | 10981223 | 0   |
| CEU | chr1 | PRAMEF8 | 11031223 | 0   |
| CEU | chr1 | PRAMEF8 | 11081223 | 0   |
| CEU | chr1 | PRAMEF8 | 11131223 | 0   |
| CEU | chr1 | PRAMEF8 | 11181223 | 0   |
| CEU | chr1 | PRAMEF8 | 11231223 | 0   |
| CEU | chr1 | PRAMEF8 | 11281223 | 0   |
| CEU | chr1 | PRAMEF8 | 11331223 | 0   |
| CEU | chr1 | PRAMEF8 | 11381223 | 0   |
| CEU | chr1 | PRAMEF8 | 11431223 | 0   |
| CEU | chr1 | PRAMEF8 | 11481223 | 0   |
| CEU | chr1 | PRAMEF8 | 11531223 | 0   |
| CEU | chr1 | PRAMEF8 | 11581223 | 0   |
| CEU | chr1 | PRAMEF8 | 11631223 | 0   |
| CEU | chr1 | PRAMEF8 | 11681223 | 0   |
| CEU | chr1 | PRAMEF8 | 11731223 | 0   |
| CEU | chr1 | PRAMEF8 | 11781223 | 0   |
| CEU | chr1 | PRAMEF8 | 11831223 | 0   |
| CEU | chr1 | PRAMEF8 | 11881223 | 0   |
| CEU | chr1 | PRAMEF8 | 11931223 | 0   |
| CEU | chr1 | PRAMEF8 | 11981223 | 0   |
| CEU | chr1 | PRAMEF8 | 12031223 | 0   |
| CEU | chr1 | PRAMEF8 | 12081223 | 0   |
| CEU | chr1 | PRAMEF8 | 12131223 | 23  |
| CEU | chr1 | PRAMEF8 | 12181223 | 35  |
| CEU | chr1 | PRAMEF8 | 12231223 | 31  |
| CEU | chr1 | PRAMEF8 | 12281223 | 43  |
| CEU | chr1 | PRAMEF8 | 12331223 | 44  |

### 3\_Introgression\_data

|     |      |         |          |     |
|-----|------|---------|----------|-----|
| CEU | chr1 | PRAMEF8 | 12381223 | 43  |
| CEU | chr1 | PRAMEF8 | 12431223 | 39  |
| CEU | chr1 | PRAMEF8 | 12481223 | 28  |
| CEU | chr1 | PRAMEF8 | 12531223 | 44  |
| CEU | chr1 | PRAMEF8 | 12581223 | 42  |
| CEU | chr1 | PRAMEF8 | 12631223 | 10  |
| CEU | chr1 | PRAMEF8 | 12681223 | 0   |
| CEU | chr1 | PRAMEF8 | 12731223 | 1   |
| CEU | chr1 | PRAMEF8 | 12781223 | 19  |
| CEU | chr1 | PRAMEF8 | 12831223 | 126 |
| CEU | chr1 | PRAMEF8 | 12881223 | 132 |
| CEU | chr1 | PRAMEF8 | 12931223 | 24  |
| CEU | chr1 | PRAMEF8 | 12981223 | 0   |
| CEU | chr1 | PRAMEF8 | 13031223 | 0   |
| CEU | chr1 | PRAMEF8 | 13081223 | 0   |
| CEU | chr1 | PRAMEF8 | 13131223 | 0   |
| CEU | chr1 | PRAMEF8 | 13181223 | 0   |
| CEU | chr1 | PRAMEF8 | 13231223 | 0   |
| CEU | chr1 | PRAMEF8 | 13281223 | 0   |
| CEU | chr1 | PRAMEF8 | 13331223 | 0   |
| CEU | chr1 | PRAMEF8 | 13381223 | 0   |
| CEU | chr1 | PRAMEF8 | 13431223 | 0   |
| CEU | chr1 | PRAMEF8 | 13481223 | 0   |
| CEU | chr1 | PRAMEF8 | 13531223 | 0   |
| CEU | chr1 | PRAMEF8 | 13581223 | 0   |
| CEU | chr1 | PRAMEF8 | 13631223 | 0   |
| CEU | chr1 | PRAMEF8 | 13681223 | 0   |
| CEU | chr1 | PRAMEF8 | 13731223 | 0   |
| CEU | chr1 | PRAMEF8 | 13781223 | 0   |
| CEU | chr1 | PRAMEF8 | 13831223 | 0   |
| CEU | chr1 | PRAMEF8 | 13881223 | 0   |
| CEU | chr1 | PRAMEF8 | 13931223 | 8   |
| CEU | chr1 | PRAMEF8 | 13981223 | 46  |
| CEU | chr1 | PRAMEF8 | 14031223 | 92  |
| CEU | chr1 | PRAMEF8 | 14081223 | 100 |
| CEU | chr1 | PRAMEF8 | 14131223 | 82  |
| CEU | chr1 | PRAMEF8 | 14181223 | 75  |
| CEU | chr1 | PRAMEF8 | 14231223 | 56  |
| CEU | chr1 | PRAMEF8 | 14281223 | 27  |
| CEU | chr1 | PRAMEF8 | 14331223 | 30  |
| CEU | chr1 | PRAMEF8 | 14381223 | 41  |
| CEU | chr1 | PRAMEF8 | 14431223 | 25  |
| CEU | chr1 | PRAMEF8 | 14481223 | 4   |
| CEU | chr1 | PRAMEF8 | 14531223 | 0   |
| CEU | chr1 | PRAMEF8 | 14581223 | 0   |
| CEU | chr1 | PRAMEF8 | 14631223 | 0   |
| CEU | chr1 | PRAMEF8 | 14681223 | 0   |
| CEU | chr1 | PRAMEF8 | 14731223 | 0   |
| CEU | chr1 | PRAMEF8 | 14781223 | 0   |

## 3\_Introgression\_data

|     |      |         |          |    |
|-----|------|---------|----------|----|
| CEU | chr1 | PRAMEF8 | 14831223 | 0  |
| CEU | chr1 | PRAMEF8 | 14881223 | 0  |
| CEU | chr1 | PRAMEF8 | 14931223 | 0  |
| CEU | chr1 | PRAMEF8 | 14981223 | 0  |
| CEU | chr1 | PRAMEF8 | 15031223 | 0  |
| CEU | chr1 | PRAMEF8 | 15081223 | 0  |
| CEU | chr1 | PRAMEF8 | 15131223 | 0  |
| CEU | chr1 | PRAMEF8 | 15181223 | 0  |
| CEU | chr1 | PRAMEF8 | 15231223 | 0  |
| CEU | chr1 | PRAMEF8 | 15281223 | 0  |
| CEU | chr1 | PRAMEF8 | 15331223 | 0  |
| CEU | chr1 | PRAMEF8 | 15381223 | 0  |
| CEU | chr1 | PRAMEF8 | 15431223 | 0  |
| CEU | chr1 | PRAMEF8 | 15481223 | 0  |
| CEU | chr1 | PRAMEF8 | 15531223 | 0  |
| CEU | chr1 | PRAMEF8 | 15581223 | 0  |
| CEU | chr1 | PRAMEF8 | 15631223 | 0  |
| CEU | chr1 | PRAMEF8 | 15681223 | 0  |
| CEU | chr1 | PRAMEF8 | 15731223 | 0  |
| CEU | chr1 | PRAMEF8 | 15781223 | 0  |
| CEU | chr1 | PRAMEF8 | 15831223 | 0  |
| CEU | chr1 | PRAMEF8 | 15881223 | 0  |
| CEU | chr1 | PRAMEF8 | 15931223 | 0  |
| CEU | chr1 | PRAMEF8 | 15981223 | 0  |
| CEU | chr1 | PRAMEF8 | 16031223 | 0  |
| CEU | chr1 | PRAMEF8 | 16081223 | 0  |
| CEU | chr1 | PRAMEF8 | 16131223 | 0  |
| CEU | chr1 | PRAMEF8 | 16181223 | 0  |
| CEU | chr1 | PRAMEF8 | 16231223 | 0  |
| CEU | chr1 | PRAMEF8 | 16281223 | 0  |
| CEU | chr1 | PRAMEF8 | 16331223 | 0  |
| CEU | chr1 | PRAMEF8 | 16381223 | 0  |
| CEU | chr1 | PRAMEF8 | 16431223 | 0  |
| CEU | chr1 | PRAMEF8 | 16481223 | 2  |
| CEU | chr1 | PRAMEF8 | 16531223 | 16 |
| CEU | chr1 | PRAMEF8 | 16581223 | 24 |
| CEU | chr1 | PRAMEF8 | 16631223 | 20 |
| CEU | chr1 | PRAMEF8 | 16681223 | 37 |
| CEU | chr1 | PRAMEF8 | 16731223 | 48 |
| CEU | chr1 | PRAMEF8 | 16781223 | 59 |
| CEU | chr1 | PRAMEF8 | 16831223 | 63 |
| CEU | chr1 | PRAMEF8 | 16881223 | 25 |
| CEU | chr1 | PRAMEF8 | 16931223 | 0  |
| CEU | chr1 | PRAMEF8 | 16981223 | 0  |
| CEU | chr1 | PRAMEF8 | 17031223 | 0  |
| CEU | chr1 | PRAMEF8 | 17081223 | 0  |
| CEU | chr1 | PRAMEF8 | 17131223 | 0  |
| CEU | chr1 | PRAMEF8 | 17181223 | 0  |
| CEU | chr1 | PRAMEF8 | 17231223 | 0  |

### 3\_Introgression\_data

|     |       |         |          |   |
|-----|-------|---------|----------|---|
| CEU | chr1  | PRAMEF8 | 17281223 | 0 |
| CEU | chr1  | PRAMEF8 | 17331223 | 0 |
| CEU | chr1  | PRAMEF8 | 17381223 | 0 |
| CEU | chr1  | PRAMEF8 | 17431223 | 0 |
| CEU | chr1  | PRAMEF8 | 17481223 | 0 |
| CEU | chr1  | PRAMEF8 | 17531223 | 0 |
| CEU | chr1  | PRAMEF8 | 17581223 | 0 |
| CEU | chr1  | PRAMEF8 | 17631223 | 0 |
| CEU | chr1  | PRAMEF8 | 17681223 | 0 |
| CEU | chr1  | PRAMEF8 | 17731223 | 0 |
| CEU | chr1  | PRAMEF8 | 17781223 | 0 |
| CEU | chr1  | PRAMEF8 | 17831223 | 0 |
| CEU | chr1  | PRAMEF8 | 17881223 | 0 |
| CEU | chr1  | PRAMEF8 | 17931223 | 0 |
| CEU | chr1  | PRAMEF8 | 17981223 | 0 |
| CEU | chr1  | PRAMEF8 | 18031223 | 0 |
| CEU | chr1  | PRAMEF8 | 18081223 | 0 |
| CEU | chr1  | PRAMEF8 | 18131223 | 0 |
| CEU | chr1  | PRAMEF8 | 18181223 | 0 |
| CEU | chr1  | PRAMEF8 | 18231223 | 0 |
| CEU | chr17 | PRR11   | 54205355 | 0 |
| CEU | chr17 | PRR11   | 54255355 | 0 |
| CEU | chr17 | PRR11   | 54305355 | 0 |
| CEU | chr17 | PRR11   | 54355355 | 0 |
| CEU | chr17 | PRR11   | 54405355 | 0 |
| CEU | chr17 | PRR11   | 54455355 | 0 |
| CEU | chr17 | PRR11   | 54505355 | 0 |
| CEU | chr17 | PRR11   | 54555355 | 0 |
| CEU | chr17 | PRR11   | 54605355 | 0 |
| CEU | chr17 | PRR11   | 54655355 | 0 |
| CEU | chr17 | PRR11   | 54705355 | 0 |
| CEU | chr17 | PRR11   | 54755355 | 0 |
| CEU | chr17 | PRR11   | 54805355 | 0 |
| CEU | chr17 | PRR11   | 54855355 | 0 |
| CEU | chr17 | PRR11   | 54905355 | 0 |
| CEU | chr17 | PRR11   | 54955355 | 0 |
| CEU | chr17 | PRR11   | 55005355 | 0 |
| CEU | chr17 | PRR11   | 55055355 | 0 |
| CEU | chr17 | PRR11   | 55105355 | 0 |
| CEU | chr17 | PRR11   | 55155355 | 0 |
| CEU | chr17 | PRR11   | 55205355 | 0 |
| CEU | chr17 | PRR11   | 55255355 | 0 |
| CEU | chr17 | PRR11   | 55305355 | 0 |
| CEU | chr17 | PRR11   | 55355355 | 0 |
| CEU | chr17 | PRR11   | 55405355 | 0 |
| CEU | chr17 | PRR11   | 55455355 | 0 |
| CEU | chr17 | PRR11   | 55505355 | 0 |
| CEU | chr17 | PRR11   | 55555355 | 0 |
| CEU | chr17 | PRR11   | 55605355 | 0 |

## 3\_Introgression\_data

|     |       |       |          |   |
|-----|-------|-------|----------|---|
| CEU | chr17 | PRR11 | 55655355 | 0 |
| CEU | chr17 | PRR11 | 55705355 | 0 |
| CEU | chr17 | PRR11 | 55755355 | 0 |
| CEU | chr17 | PRR11 | 55805355 | 0 |
| CEU | chr17 | PRR11 | 55855355 | 0 |
| CEU | chr17 | PRR11 | 55905355 | 0 |
| CEU | chr17 | PRR11 | 55955355 | 0 |
| CEU | chr17 | PRR11 | 56005355 | 0 |
| CEU | chr17 | PRR11 | 56055355 | 0 |
| CEU | chr17 | PRR11 | 56105355 | 0 |
| CEU | chr17 | PRR11 | 56155355 | 0 |
| CEU | chr17 | PRR11 | 56205355 | 0 |
| CEU | chr17 | PRR11 | 56255355 | 0 |
| CEU | chr17 | PRR11 | 56305355 | 0 |
| CEU | chr17 | PRR11 | 56355355 | 0 |
| CEU | chr17 | PRR11 | 56405355 | 0 |
| CEU | chr17 | PRR11 | 56455355 | 0 |
| CEU | chr17 | PRR11 | 56505355 | 0 |
| CEU | chr17 | PRR11 | 56555355 | 0 |
| CEU | chr17 | PRR11 | 56605355 | 0 |
| CEU | chr17 | PRR11 | 56655355 | 0 |
| CEU | chr17 | PRR11 | 56705355 | 0 |
| CEU | chr17 | PRR11 | 56755355 | 0 |
| CEU | chr17 | PRR11 | 56805355 | 0 |
| CEU | chr17 | PRR11 | 56855355 | 0 |
| CEU | chr17 | PRR11 | 56905355 | 0 |
| CEU | chr17 | PRR11 | 56955355 | 0 |
| CEU | chr17 | PRR11 | 57005355 | 0 |
| CEU | chr17 | PRR11 | 57055355 | 0 |
| CEU | chr17 | PRR11 | 57105355 | 0 |
| CEU | chr17 | PRR11 | 57155355 | 0 |
| CEU | chr17 | PRR11 | 57205355 | 0 |
| CEU | chr17 | PRR11 | 57255355 | 0 |
| CEU | chr17 | PRR11 | 57305355 | 0 |
| CEU | chr17 | PRR11 | 57355355 | 0 |
| CEU | chr17 | PRR11 | 57405355 | 0 |
| CEU | chr17 | PRR11 | 57455355 | 0 |
| CEU | chr17 | PRR11 | 57505355 | 0 |
| CEU | chr17 | PRR11 | 57555355 | 0 |
| CEU | chr17 | PRR11 | 57605355 | 0 |
| CEU | chr17 | PRR11 | 57655355 | 0 |
| CEU | chr17 | PRR11 | 57705355 | 0 |
| CEU | chr17 | PRR11 | 57755355 | 0 |
| CEU | chr17 | PRR11 | 57805355 | 0 |
| CEU | chr17 | PRR11 | 57855355 | 0 |
| CEU | chr17 | PRR11 | 57905355 | 0 |
| CEU | chr17 | PRR11 | 57955355 | 0 |
| CEU | chr17 | PRR11 | 58005355 | 0 |
| CEU | chr17 | PRR11 | 58055355 | 0 |



### 3\_Introgression\_data

|     |       |       |          |   |
|-----|-------|-------|----------|---|
| CEU | chr17 | PRR11 | 58105355 | 0 |
| CEU | chr17 | PRR11 | 58155355 | 0 |
| CEU | chr17 | PRR11 | 58205355 | 0 |
| CEU | chr17 | PRR11 | 58255355 | 0 |
| CEU | chr17 | PRR11 | 58305355 | 0 |
| CEU | chr17 | PRR11 | 58355355 | 0 |
| CEU | chr17 | PRR11 | 58405355 | 0 |
| CEU | chr17 | PRR11 | 58455355 | 0 |
| CEU | chr17 | PRR11 | 58505355 | 0 |
| CEU | chr17 | PRR11 | 58555355 | 0 |
| CEU | chr17 | PRR11 | 58605355 | 0 |
| CEU | chr17 | PRR11 | 58655355 | 0 |
| CEU | chr17 | PRR11 | 58705355 | 0 |
| CEU | chr17 | PRR11 | 58755355 | 0 |
| CEU | chr17 | PRR11 | 58805355 | 0 |
| CEU | chr17 | PRR11 | 58855355 | 0 |
| CEU | chr17 | PRR11 | 58905355 | 0 |
| CEU | chr17 | PRR11 | 58955355 | 0 |
| CEU | chr17 | PRR11 | 59005355 | 0 |
| CEU | chr17 | PRR11 | 59055355 | 0 |
| CEU | chr17 | PRR11 | 59105355 | 0 |
| CEU | chr17 | PRR11 | 59155355 | 0 |
| CEU | chr17 | PRR11 | 59205355 | 0 |
| CEU | chr17 | PRR11 | 59255355 | 0 |
| CEU | chr17 | PRR11 | 59305355 | 0 |
| CEU | chr17 | PRR11 | 59355355 | 0 |
| CEU | chr17 | PRR11 | 59405355 | 0 |
| CEU | chr17 | PRR11 | 59455355 | 0 |
| CEU | chr17 | PRR11 | 59505355 | 0 |
| CEU | chr17 | PRR11 | 59555355 | 0 |
| CEU | chr17 | PRR11 | 59605355 | 0 |
| CEU | chr17 | PRR11 | 59655355 | 0 |
| CEU | chr17 | PRR11 | 59705355 | 0 |
| CEU | chr17 | PRR11 | 59755355 | 0 |
| CEU | chr17 | PRR11 | 59805355 | 0 |
| CEU | chr17 | PRR11 | 59855355 | 0 |
| CEU | chr17 | PRR11 | 59905355 | 0 |
| CEU | chr17 | PRR11 | 59955355 | 0 |
| CEU | chr17 | PRR11 | 60005355 | 0 |
| CEU | chr17 | PRR11 | 60055355 | 0 |
| CEU | chr17 | PRR11 | 60105355 | 0 |
| CEU | chr17 | PRR11 | 60155355 | 0 |
| CEU | chr17 | PRR11 | 60205355 | 0 |
| CEU | chr17 | PRR11 | 60255355 | 0 |
| CEU | chr17 | PRR11 | 60305355 | 0 |
| CEU | chr17 | PRR11 | 60355355 | 0 |
| CEU | chr17 | PRR11 | 60405355 | 0 |
| CEU | chr17 | PRR11 | 60455355 | 0 |
| CEU | chr17 | PRR11 | 60505355 | 0 |

## 3\_Introgression\_data

|     |       |       |          |   |
|-----|-------|-------|----------|---|
| CEU | chr17 | PRR11 | 60555355 | 0 |
| CEU | chr17 | PRR11 | 60605355 | 0 |
| CEU | chr17 | PRR11 | 60655355 | 0 |
| CEU | chr17 | PRR11 | 60705355 | 0 |
| CEU | chr17 | PRR11 | 60755355 | 0 |
| CEU | chr17 | PRR11 | 60805355 | 0 |
| CEU | chr17 | PRR11 | 60855355 | 0 |
| CEU | chr17 | PRR11 | 60905355 | 0 |
| CEU | chr17 | PRR11 | 60955355 | 0 |
| CEU | chr17 | PRR11 | 61005355 | 0 |
| CEU | chr17 | PRR11 | 61055355 | 0 |
| CEU | chr17 | PRR11 | 61105355 | 0 |
| CEU | chr17 | PRR11 | 61155355 | 0 |
| CEU | chr17 | PRR11 | 61205355 | 0 |
| CEU | chr17 | PRR11 | 61255355 | 0 |
| CEU | chr17 | PRR11 | 61305355 | 0 |
| CEU | chr17 | PRR11 | 61355355 | 0 |
| CEU | chr17 | PRR11 | 61405355 | 0 |
| CEU | chr17 | PRR11 | 61455355 | 0 |
| CEU | chr17 | PRR11 | 61505355 | 0 |
| CEU | chr17 | PRR11 | 61555355 | 0 |
| CEU | chr17 | PRR11 | 61605355 | 0 |
| CEU | chr17 | PRR11 | 61655355 | 0 |
| CEU | chr17 | PRR11 | 61705355 | 0 |
| CEU | chr17 | PRR11 | 61755355 | 0 |
| CEU | chr17 | PRR11 | 61805355 | 0 |
| CEU | chr17 | PRR11 | 61855355 | 0 |
| CEU | chr17 | PRR11 | 61905355 | 0 |
| CEU | chr17 | PRR11 | 61955355 | 0 |
| CEU | chr17 | PRR11 | 62005355 | 0 |
| CEU | chr17 | PRR11 | 62055355 | 0 |
| CEU | chr17 | PRR11 | 62105355 | 0 |
| CEU | chr17 | PRR11 | 62155355 | 0 |
| CEU | chr17 | PRR11 | 62205355 | 0 |
| CEU | chr17 | PRR11 | 62255355 | 0 |
| CEU | chr17 | PRR11 | 62305355 | 0 |
| CEU | chr17 | PRR11 | 62355355 | 0 |
| CEU | chr17 | PRR11 | 62405355 | 0 |
| CEU | chr17 | PRR11 | 62455355 | 0 |
| CEU | chr17 | PRR11 | 62505355 | 0 |
| CEU | chr17 | PRR11 | 62555355 | 0 |
| CEU | chr17 | PRR11 | 62605355 | 0 |
| CEU | chr17 | PRR11 | 62655355 | 0 |
| CEU | chr17 | PRR11 | 62705355 | 0 |
| CEU | chr17 | PRR11 | 62755355 | 0 |
| CEU | chr17 | PRR11 | 62805355 | 0 |
| CEU | chr17 | PRR11 | 62855355 | 0 |
| CEU | chr17 | PRR11 | 62905355 | 0 |
| CEU | chr17 | PRR11 | 62955355 | 0 |

### 3\_Introgression\_data

|     |       |        |          |   |
|-----|-------|--------|----------|---|
| CEU | chr17 | PRR11  | 63005355 | 0 |
| CEU | chr17 | PRR11  | 63055355 | 0 |
| CEU | chr17 | PRR11  | 63105355 | 0 |
| CEU | chr17 | PRR11  | 63155355 | 0 |
| CEU | chr17 | PRR11  | 63205355 | 0 |
| CEU | chr17 | PRR11  | 63255355 | 0 |
| CEU | chr17 | PRR11  | 63305355 | 0 |
| CEU | chr17 | PRR11  | 63355355 | 0 |
| CEU | chr17 | PRR11  | 63405355 | 0 |
| CEU | chr17 | PRR11  | 63455355 | 0 |
| CEU | chr17 | PRR11  | 63505355 | 0 |
| CEU | chr17 | PRR11  | 63555355 | 0 |
| CEU | chr17 | PRR11  | 63605355 | 0 |
| CEU | chr17 | PRR11  | 63655355 | 0 |
| CEU | chr17 | PRR11  | 63705355 | 0 |
| CEU | chr17 | PRR11  | 63755355 | 0 |
| CEU | chr17 | PRR11  | 63805355 | 0 |
| CEU | chr17 | PRR11  | 63855355 | 0 |
| CEU | chr17 | PRR11  | 63905355 | 0 |
| CEU | chr17 | PRR11  | 63955355 | 0 |
| CEU | chr17 | PRR11  | 64005355 | 0 |
| CEU | chr17 | PRR11  | 64055355 | 0 |
| CEU | chr17 | PRR11  | 64105355 | 0 |
| CEU | chr17 | PRR11  | 64155355 | 0 |
| CEU | chr13 | PRR20A | 52190918 | 0 |
| CEU | chr13 | PRR20A | 52240918 | 0 |
| CEU | chr13 | PRR20A | 52290918 | 0 |
| CEU | chr13 | PRR20A | 52340918 | 0 |
| CEU | chr13 | PRR20A | 52390918 | 0 |
| CEU | chr13 | PRR20A | 52440918 | 0 |
| CEU | chr13 | PRR20A | 52490918 | 0 |
| CEU | chr13 | PRR20A | 52540918 | 0 |
| CEU | chr13 | PRR20A | 52590918 | 0 |
| CEU | chr13 | PRR20A | 52640918 | 0 |
| CEU | chr13 | PRR20A | 52690918 | 0 |
| CEU | chr13 | PRR20A | 52740918 | 0 |
| CEU | chr13 | PRR20A | 52790918 | 0 |
| CEU | chr13 | PRR20A | 52840918 | 0 |
| CEU | chr13 | PRR20A | 52890918 | 0 |
| CEU | chr13 | PRR20A | 52940918 | 0 |
| CEU | chr13 | PRR20A | 52990918 | 0 |
| CEU | chr13 | PRR20A | 53040918 | 0 |
| CEU | chr13 | PRR20A | 53090918 | 0 |
| CEU | chr13 | PRR20A | 53140918 | 0 |
| CEU | chr13 | PRR20A | 53190918 | 0 |
| CEU | chr13 | PRR20A | 53240918 | 0 |
| CEU | chr13 | PRR20A | 53290918 | 0 |
| CEU | chr13 | PRR20A | 53340918 | 0 |
| CEU | chr13 | PRR20A | 53390918 | 0 |

### 3\_Introgression\_data

|     |       |        |          |   |
|-----|-------|--------|----------|---|
| CEU | chr13 | PRR20A | 53440918 | 0 |
| CEU | chr13 | PRR20A | 53490918 | 0 |
| CEU | chr13 | PRR20A | 53540918 | 0 |
| CEU | chr13 | PRR20A | 53590918 | 0 |
| CEU | chr13 | PRR20A | 53640918 | 0 |
| CEU | chr13 | PRR20A | 53690918 | 0 |
| CEU | chr13 | PRR20A | 53740918 | 0 |
| CEU | chr13 | PRR20A | 53790918 | 0 |
| CEU | chr13 | PRR20A | 53840918 | 0 |
| CEU | chr13 | PRR20A | 53890918 | 0 |
| CEU | chr13 | PRR20A | 53940918 | 0 |
| CEU | chr13 | PRR20A | 53990918 | 0 |
| CEU | chr13 | PRR20A | 54040918 | 0 |
| CEU | chr13 | PRR20A | 54090918 | 0 |
| CEU | chr13 | PRR20A | 54140918 | 0 |
| CEU | chr13 | PRR20A | 54190918 | 0 |
| CEU | chr13 | PRR20A | 54240918 | 0 |
| CEU | chr13 | PRR20A | 54290918 | 0 |
| CEU | chr13 | PRR20A | 54340918 | 0 |
| CEU | chr13 | PRR20A | 54390918 | 0 |
| CEU | chr13 | PRR20A | 54440918 | 0 |
| CEU | chr13 | PRR20A | 54490918 | 0 |
| CEU | chr13 | PRR20A | 54540918 | 0 |
| CEU | chr13 | PRR20A | 54590918 | 0 |
| CEU | chr13 | PRR20A | 54640918 | 0 |
| CEU | chr13 | PRR20A | 54690918 | 0 |
| CEU | chr13 | PRR20A | 54740918 | 0 |
| CEU | chr13 | PRR20A | 54790918 | 0 |
| CEU | chr13 | PRR20A | 54840918 | 0 |
| CEU | chr13 | PRR20A | 54890918 | 0 |
| CEU | chr13 | PRR20A | 54940918 | 0 |
| CEU | chr13 | PRR20A | 54990918 | 0 |
| CEU | chr13 | PRR20A | 55040918 | 0 |
| CEU | chr13 | PRR20A | 55090918 | 0 |
| CEU | chr13 | PRR20A | 55140918 | 0 |
| CEU | chr13 | PRR20A | 55190918 | 0 |
| CEU | chr13 | PRR20A | 55240918 | 0 |
| CEU | chr13 | PRR20A | 55290918 | 0 |
| CEU | chr13 | PRR20A | 55340918 | 0 |
| CEU | chr13 | PRR20A | 55390918 | 0 |
| CEU | chr13 | PRR20A | 55440918 | 0 |
| CEU | chr13 | PRR20A | 55490918 | 0 |
| CEU | chr13 | PRR20A | 55540918 | 0 |
| CEU | chr13 | PRR20A | 55590918 | 0 |
| CEU | chr13 | PRR20A | 55640918 | 0 |
| CEU | chr13 | PRR20A | 55690918 | 0 |
| CEU | chr13 | PRR20A | 55740918 | 0 |
| CEU | chr13 | PRR20A | 55790918 | 0 |
| CEU | chr13 | PRR20A | 55840918 | 0 |

### 3\_Introgression\_data

|     |       |        |          |   |
|-----|-------|--------|----------|---|
| CEU | chr13 | PRR20A | 55890918 | 0 |
| CEU | chr13 | PRR20A | 55940918 | 0 |
| CEU | chr13 | PRR20A | 55990918 | 0 |
| CEU | chr13 | PRR20A | 56040918 | 0 |
| CEU | chr13 | PRR20A | 56090918 | 0 |
| CEU | chr13 | PRR20A | 56140918 | 0 |
| CEU | chr13 | PRR20A | 56190918 | 0 |
| CEU | chr13 | PRR20A | 56240918 | 0 |
| CEU | chr13 | PRR20A | 56290918 | 0 |
| CEU | chr13 | PRR20A | 56340918 | 0 |
| CEU | chr13 | PRR20A | 56390918 | 0 |
| CEU | chr13 | PRR20A | 56440918 | 0 |
| CEU | chr13 | PRR20A | 56490918 | 0 |
| CEU | chr13 | PRR20A | 56540918 | 0 |
| CEU | chr13 | PRR20A | 56590918 | 0 |
| CEU | chr13 | PRR20A | 56640918 | 0 |
| CEU | chr13 | PRR20A | 56690918 | 0 |
| CEU | chr13 | PRR20A | 56740918 | 0 |
| CEU | chr13 | PRR20A | 56790918 | 0 |
| CEU | chr13 | PRR20A | 56840918 | 0 |
| CEU | chr13 | PRR20A | 56890918 | 0 |
| CEU | chr13 | PRR20A | 56940918 | 0 |
| CEU | chr13 | PRR20A | 56990918 | 0 |
| CEU | chr13 | PRR20A | 57040918 | 0 |
| CEU | chr13 | PRR20A | 57090918 | 0 |
| CEU | chr13 | PRR20A | 57140918 | 0 |
| CEU | chr13 | PRR20A | 57190918 | 0 |
| CEU | chr13 | PRR20A | 57240918 | 0 |
| CEU | chr13 | PRR20A | 57290918 | 0 |
| CEU | chr13 | PRR20A | 57340918 | 0 |
| CEU | chr13 | PRR20A | 57390918 | 0 |
| CEU | chr13 | PRR20A | 57440918 | 0 |
| CEU | chr13 | PRR20A | 57490918 | 0 |
| CEU | chr13 | PRR20A | 57540918 | 0 |
| CEU | chr13 | PRR20A | 57590918 | 0 |
| CEU | chr13 | PRR20A | 57640918 | 0 |
| CEU | chr13 | PRR20A | 57690918 | 0 |
| CEU | chr13 | PRR20A | 57740918 | 0 |
| CEU | chr13 | PRR20A | 57790918 | 0 |
| CEU | chr13 | PRR20A | 57840918 | 0 |
| CEU | chr13 | PRR20A | 57890918 | 0 |
| CEU | chr13 | PRR20A | 57940918 | 0 |
| CEU | chr13 | PRR20A | 57990918 | 0 |
| CEU | chr13 | PRR20A | 58040918 | 0 |
| CEU | chr13 | PRR20A | 58090918 | 0 |
| CEU | chr13 | PRR20A | 58140918 | 0 |
| CEU | chr13 | PRR20A | 58190918 | 0 |
| CEU | chr13 | PRR20A | 58240918 | 0 |
| CEU | chr13 | PRR20A | 58290918 | 0 |

## 3\_Introgression\_data

|     |       |        |          |   |
|-----|-------|--------|----------|---|
| CEU | chr13 | PRR20A | 58340918 | 0 |
| CEU | chr13 | PRR20A | 58390918 | 0 |
| CEU | chr13 | PRR20A | 58440918 | 0 |
| CEU | chr13 | PRR20A | 58490918 | 0 |
| CEU | chr13 | PRR20A | 58540918 | 0 |
| CEU | chr13 | PRR20A | 58590918 | 0 |
| CEU | chr13 | PRR20A | 58640918 | 0 |
| CEU | chr13 | PRR20A | 58690918 | 0 |
| CEU | chr13 | PRR20A | 58740918 | 0 |
| CEU | chr13 | PRR20A | 58790918 | 0 |
| CEU | chr13 | PRR20A | 58840918 | 0 |
| CEU | chr13 | PRR20A | 58890918 | 0 |
| CEU | chr13 | PRR20A | 58940918 | 0 |
| CEU | chr13 | PRR20A | 58990918 | 0 |
| CEU | chr13 | PRR20A | 59040918 | 0 |
| CEU | chr13 | PRR20A | 59090918 | 0 |
| CEU | chr13 | PRR20A | 59140918 | 0 |
| CEU | chr13 | PRR20A | 59190918 | 0 |
| CEU | chr13 | PRR20A | 59240918 | 0 |
| CEU | chr13 | PRR20A | 59290918 | 0 |
| CEU | chr13 | PRR20A | 59340918 | 0 |
| CEU | chr13 | PRR20A | 59390918 | 0 |
| CEU | chr13 | PRR20A | 59440918 | 0 |
| CEU | chr13 | PRR20A | 59490918 | 0 |
| CEU | chr13 | PRR20A | 59540918 | 0 |
| CEU | chr13 | PRR20A | 59590918 | 0 |
| CEU | chr13 | PRR20A | 59640918 | 0 |
| CEU | chr13 | PRR20A | 59690918 | 0 |
| CEU | chr13 | PRR20A | 59740918 | 0 |
| CEU | chr13 | PRR20A | 59790918 | 0 |
| CEU | chr13 | PRR20A | 59840918 | 0 |
| CEU | chr13 | PRR20A | 59890918 | 0 |
| CEU | chr13 | PRR20A | 59940918 | 0 |
| CEU | chr13 | PRR20A | 59990918 | 0 |
| CEU | chr13 | PRR20A | 60040918 | 0 |
| CEU | chr13 | PRR20A | 60090918 | 0 |
| CEU | chr13 | PRR20A | 60140918 | 0 |
| CEU | chr13 | PRR20A | 60190918 | 0 |
| CEU | chr13 | PRR20A | 60240918 | 0 |
| CEU | chr13 | PRR20A | 60290918 | 0 |
| CEU | chr13 | PRR20A | 60340918 | 0 |
| CEU | chr13 | PRR20A | 60390918 | 0 |
| CEU | chr13 | PRR20A | 60440918 | 0 |
| CEU | chr13 | PRR20A | 60490918 | 0 |
| CEU | chr13 | PRR20A | 60540918 | 0 |
| CEU | chr13 | PRR20A | 60590918 | 0 |
| CEU | chr13 | PRR20A | 60640918 | 0 |
| CEU | chr13 | PRR20A | 60690918 | 0 |
| CEU | chr13 | PRR20A | 60740918 | 0 |

## 3\_Introgression\_data

|     |       |        |          |   |
|-----|-------|--------|----------|---|
| CEU | chr13 | PRR20A | 60790918 | 0 |
| CEU | chr13 | PRR20A | 60840918 | 0 |
| CEU | chr13 | PRR20A | 60890918 | 0 |
| CEU | chr13 | PRR20A | 60940918 | 0 |
| CEU | chr13 | PRR20A | 60990918 | 0 |
| CEU | chr13 | PRR20A | 61040918 | 0 |
| CEU | chr13 | PRR20A | 61090918 | 0 |
| CEU | chr13 | PRR20A | 61140918 | 0 |
| CEU | chr13 | PRR20A | 61190918 | 0 |
| CEU | chr13 | PRR20A | 61240918 | 0 |
| CEU | chr13 | PRR20A | 61290918 | 0 |
| CEU | chr13 | PRR20A | 61340918 | 0 |
| CEU | chr13 | PRR20A | 61390918 | 0 |
| CEU | chr13 | PRR20A | 61440918 | 0 |
| CEU | chr13 | PRR20A | 61490918 | 0 |
| CEU | chr13 | PRR20A | 61540918 | 0 |
| CEU | chr13 | PRR20A | 61590918 | 0 |
| CEU | chr13 | PRR20A | 61640918 | 0 |
| CEU | chr13 | PRR20A | 61690918 | 0 |
| CEU | chr13 | PRR20A | 61740918 | 0 |
| CEU | chr13 | PRR20A | 61790918 | 0 |
| CEU | chr13 | PRR20A | 61840918 | 0 |
| CEU | chr13 | PRR20A | 61890918 | 0 |
| CEU | chr13 | PRR20A | 61940918 | 0 |
| CEU | chr13 | PRR20A | 61990918 | 0 |
| CEU | chr13 | PRR20A | 62040918 | 0 |
| CEU | chr13 | PRR20A | 62090918 | 0 |
| CEU | chr19 | PSG3   | 37771642 | 0 |
| CEU | chr19 | PSG3   | 37821642 | 0 |
| CEU | chr19 | PSG3   | 37871642 | 0 |
| CEU | chr19 | PSG3   | 37921642 | 0 |
| CEU | chr19 | PSG3   | 37971642 | 0 |
| CEU | chr19 | PSG3   | 38021642 | 0 |
| CEU | chr19 | PSG3   | 38071642 | 0 |
| CEU | chr19 | PSG3   | 38121642 | 0 |
| CEU | chr19 | PSG3   | 38171642 | 0 |
| CEU | chr19 | PSG3   | 38221642 | 0 |
| CEU | chr19 | PSG3   | 38271642 | 0 |
| CEU | chr19 | PSG3   | 38321642 | 0 |
| CEU | chr19 | PSG3   | 38371642 | 0 |
| CEU | chr19 | PSG3   | 38421642 | 0 |
| CEU | chr19 | PSG3   | 38471642 | 0 |
| CEU | chr19 | PSG3   | 38521642 | 0 |
| CEU | chr19 | PSG3   | 38571642 | 0 |
| CEU | chr19 | PSG3   | 38621642 | 0 |
| CEU | chr19 | PSG3   | 38671642 | 0 |
| CEU | chr19 | PSG3   | 38721642 | 0 |
| CEU | chr19 | PSG3   | 38771642 | 0 |
| CEU | chr19 | PSG3   | 38821642 | 0 |

## 3\_Introgression\_data

|     |       |      |          |    |
|-----|-------|------|----------|----|
| CEU | chr19 | PSG3 | 38871642 | 0  |
| CEU | chr19 | PSG3 | 38921642 | 0  |
| CEU | chr19 | PSG3 | 38971642 | 0  |
| CEU | chr19 | PSG3 | 39021642 | 0  |
| CEU | chr19 | PSG3 | 39071642 | 0  |
| CEU | chr19 | PSG3 | 39121642 | 0  |
| CEU | chr19 | PSG3 | 39171642 | 0  |
| CEU | chr19 | PSG3 | 39221642 | 0  |
| CEU | chr19 | PSG3 | 39271642 | 0  |
| CEU | chr19 | PSG3 | 39321642 | 0  |
| CEU | chr19 | PSG3 | 39371642 | 0  |
| CEU | chr19 | PSG3 | 39421642 | 0  |
| CEU | chr19 | PSG3 | 39471642 | 0  |
| CEU | chr19 | PSG3 | 39521642 | 0  |
| CEU | chr19 | PSG3 | 39571642 | 0  |
| CEU | chr19 | PSG3 | 39621642 | 2  |
| CEU | chr19 | PSG3 | 39671642 | 33 |
| CEU | chr19 | PSG3 | 39721642 | 49 |
| CEU | chr19 | PSG3 | 39771642 | 36 |
| CEU | chr19 | PSG3 | 39821642 | 48 |
| CEU | chr19 | PSG3 | 39871642 | 33 |
| CEU | chr19 | PSG3 | 39921642 | 3  |
| CEU | chr19 | PSG3 | 39971642 | 0  |
| CEU | chr19 | PSG3 | 40021642 | 0  |
| CEU | chr19 | PSG3 | 40071642 | 0  |
| CEU | chr19 | PSG3 | 40121642 | 0  |
| CEU | chr19 | PSG3 | 40171642 | 0  |
| CEU | chr19 | PSG3 | 40221642 | 0  |
| CEU | chr19 | PSG3 | 40271642 | 0  |
| CEU | chr19 | PSG3 | 40321642 | 0  |
| CEU | chr19 | PSG3 | 40371642 | 0  |
| CEU | chr19 | PSG3 | 40421642 | 0  |
| CEU | chr19 | PSG3 | 40471642 | 0  |
| CEU | chr19 | PSG3 | 40521642 | 0  |
| CEU | chr19 | PSG3 | 40571642 | 0  |
| CEU | chr19 | PSG3 | 40621642 | 0  |
| CEU | chr19 | PSG3 | 40671642 | 0  |
| CEU | chr19 | PSG3 | 40721642 | 0  |
| CEU | chr19 | PSG3 | 40771642 | 0  |
| CEU | chr19 | PSG3 | 40821642 | 0  |
| CEU | chr19 | PSG3 | 40871642 | 0  |
| CEU | chr19 | PSG3 | 40921642 | 0  |
| CEU | chr19 | PSG3 | 40971642 | 0  |
| CEU | chr19 | PSG3 | 41021642 | 0  |
| CEU | chr19 | PSG3 | 41071642 | 10 |
| CEU | chr19 | PSG3 | 41121642 | 20 |
| CEU | chr19 | PSG3 | 41171642 | 31 |
| CEU | chr19 | PSG3 | 41221642 | 45 |
| CEU | chr19 | PSG3 | 41271642 | 50 |



## 3\_Introgression\_data

|     |       |      |          |    |
|-----|-------|------|----------|----|
| CEU | chr19 | PSG3 | 41321642 | 44 |
| CEU | chr19 | PSG3 | 41371642 | 18 |
| CEU | chr19 | PSG3 | 41421642 | 0  |
| CEU | chr19 | PSG3 | 41471642 | 0  |
| CEU | chr19 | PSG3 | 41521642 | 0  |
| CEU | chr19 | PSG3 | 41571642 | 0  |
| CEU | chr19 | PSG3 | 41621642 | 0  |
| CEU | chr19 | PSG3 | 41671642 | 0  |
| CEU | chr19 | PSG3 | 41721642 | 0  |
| CEU | chr19 | PSG3 | 41771642 | 0  |
| CEU | chr19 | PSG3 | 41821642 | 0  |
| CEU | chr19 | PSG3 | 41871642 | 0  |
| CEU | chr19 | PSG3 | 41921642 | 0  |
| CEU | chr19 | PSG3 | 41971642 | 0  |
| CEU | chr19 | PSG3 | 42021642 | 0  |
| CEU | chr19 | PSG3 | 42071642 | 0  |
| CEU | chr19 | PSG3 | 42121642 | 0  |
| CEU | chr19 | PSG3 | 42171642 | 0  |
| CEU | chr19 | PSG3 | 42221642 | 0  |
| CEU | chr19 | PSG3 | 42271642 | 0  |
| CEU | chr19 | PSG3 | 42321642 | 0  |
| CEU | chr19 | PSG3 | 42371642 | 0  |
| CEU | chr19 | PSG3 | 42421642 | 0  |
| CEU | chr19 | PSG3 | 42471642 | 0  |
| CEU | chr19 | PSG3 | 42521642 | 0  |
| CEU | chr19 | PSG3 | 42571642 | 0  |
| CEU | chr19 | PSG3 | 42621642 | 0  |
| CEU | chr19 | PSG3 | 42671642 | 0  |
| CEU | chr19 | PSG3 | 42721642 | 0  |
| CEU | chr19 | PSG3 | 42771642 | 0  |
| CEU | chr19 | PSG3 | 42821642 | 0  |
| CEU | chr19 | PSG3 | 42871642 | 0  |
| CEU | chr19 | PSG3 | 42921642 | 0  |
| CEU | chr19 | PSG3 | 42971642 | 0  |
| CEU | chr19 | PSG3 | 43021642 | 0  |
| CEU | chr19 | PSG3 | 43071642 | 0  |
| CEU | chr19 | PSG3 | 43121642 | 0  |
| CEU | chr19 | PSG3 | 43171642 | 0  |
| CEU | chr19 | PSG3 | 43221642 | 0  |
| CEU | chr19 | PSG3 | 43271642 | 0  |
| CEU | chr19 | PSG3 | 43321642 | 0  |
| CEU | chr19 | PSG3 | 43371642 | 0  |
| CEU | chr19 | PSG3 | 43421642 | 0  |
| CEU | chr19 | PSG3 | 43471642 | 0  |
| CEU | chr19 | PSG3 | 43521642 | 0  |
| CEU | chr19 | PSG3 | 43571642 | 0  |
| CEU | chr19 | PSG3 | 43621642 | 0  |
| CEU | chr19 | PSG3 | 43671642 | 0  |
| CEU | chr19 | PSG3 | 43721642 | 0  |

### 3\_Introgression\_data

|     |       |      |          |    |
|-----|-------|------|----------|----|
| CEU | chr19 | PSG3 | 43771642 | 0  |
| CEU | chr19 | PSG3 | 43821642 | 5  |
| CEU | chr19 | PSG3 | 43871642 | 29 |
| CEU | chr19 | PSG3 | 43921642 | 39 |
| CEU | chr19 | PSG3 | 43971642 | 15 |
| CEU | chr19 | PSG3 | 44021642 | 0  |
| CEU | chr19 | PSG3 | 44071642 | 0  |
| CEU | chr19 | PSG3 | 44121642 | 0  |
| CEU | chr19 | PSG3 | 44171642 | 0  |
| CEU | chr19 | PSG3 | 44221642 | 0  |
| CEU | chr19 | PSG3 | 44271642 | 0  |
| CEU | chr19 | PSG3 | 44321642 | 0  |
| CEU | chr19 | PSG3 | 44371642 | 0  |
| CEU | chr19 | PSG3 | 44421642 | 0  |
| CEU | chr19 | PSG3 | 44471642 | 0  |
| CEU | chr19 | PSG3 | 44521642 | 0  |
| CEU | chr19 | PSG3 | 44571642 | 0  |
| CEU | chr19 | PSG3 | 44621642 | 0  |
| CEU | chr19 | PSG3 | 44671642 | 0  |
| CEU | chr19 | PSG3 | 44721642 | 0  |
| CEU | chr19 | PSG3 | 44771642 | 0  |
| CEU | chr19 | PSG3 | 44821642 | 0  |
| CEU | chr19 | PSG3 | 44871642 | 0  |
| CEU | chr19 | PSG3 | 44921642 | 0  |
| CEU | chr19 | PSG3 | 44971642 | 0  |
| CEU | chr19 | PSG3 | 45021642 | 0  |
| CEU | chr19 | PSG3 | 45071642 | 0  |
| CEU | chr19 | PSG3 | 45121642 | 0  |
| CEU | chr19 | PSG3 | 45171642 | 2  |
| CEU | chr19 | PSG3 | 45221642 | 21 |
| CEU | chr19 | PSG3 | 45271642 | 37 |
| CEU | chr19 | PSG3 | 45321642 | 24 |
| CEU | chr19 | PSG3 | 45371642 | 6  |
| CEU | chr19 | PSG3 | 45421642 | 0  |
| CEU | chr19 | PSG3 | 45471642 | 0  |
| CEU | chr19 | PSG3 | 45521642 | 0  |
| CEU | chr19 | PSG3 | 45571642 | 0  |
| CEU | chr19 | PSG3 | 45621642 | 0  |
| CEU | chr19 | PSG3 | 45671642 | 10 |
| CEU | chr19 | PSG3 | 45721642 | 31 |
| CEU | chr19 | PSG3 | 45771642 | 33 |
| CEU | chr19 | PSG3 | 45821642 | 20 |
| CEU | chr19 | PSG3 | 45871642 | 8  |
| CEU | chr19 | PSG3 | 45921642 | 0  |
| CEU | chr19 | PSG3 | 45971642 | 0  |
| CEU | chr19 | PSG3 | 46021642 | 0  |
| CEU | chr19 | PSG3 | 46071642 | 0  |
| CEU | chr19 | PSG3 | 46121642 | 0  |
| CEU | chr19 | PSG3 | 46171642 | 0  |

## 3\_Introgression\_data

|     |       |       |          |     |
|-----|-------|-------|----------|-----|
| CEU | chr19 | PSG3  | 46221642 | 0   |
| CEU | chr19 | PSG3  | 46271642 | 0   |
| CEU | chr19 | PSG3  | 46321642 | 0   |
| CEU | chr19 | PSG3  | 46371642 | 0   |
| CEU | chr19 | PSG3  | 46421642 | 0   |
| CEU | chr19 | PSG3  | 46471642 | 0   |
| CEU | chr19 | PSG3  | 46521642 | 0   |
| CEU | chr19 | PSG3  | 46571642 | 145 |
| CEU | chr19 | PSG3  | 46621642 | 151 |
| CEU | chr19 | PSG3  | 46671642 | 13  |
| CEU | chr19 | PSG3  | 46721642 | 27  |
| CEU | chr19 | PSG3  | 46771642 | 39  |
| CEU | chr19 | PSG3  | 46821642 | 39  |
| CEU | chr19 | PSG3  | 46871642 | 33  |
| CEU | chr19 | PSG3  | 46921642 | 53  |
| CEU | chr19 | PSG3  | 46971642 | 68  |
| CEU | chr19 | PSG3  | 47021642 | 34  |
| CEU | chr19 | PSG3  | 47071642 | 6   |
| CEU | chr19 | PSG3  | 47121642 | 0   |
| CEU | chr19 | PSG3  | 47171642 | 0   |
| CEU | chr19 | PSG3  | 47221642 | 0   |
| CEU | chr19 | PSG3  | 47271642 | 0   |
| CEU | chr19 | PSG3  | 47321642 | 0   |
| CEU | chr19 | PSG3  | 47371642 | 0   |
| CEU | chr19 | PSG3  | 47421642 | 0   |
| CEU | chr19 | PSG3  | 47471642 | 0   |
| CEU | chr19 | PSG3  | 47521642 | 0   |
| CEU | chr19 | PSG3  | 47571642 | 0   |
| CEU | chr19 | PSG3  | 47621642 | 0   |
| CEU | chr19 | PSG3  | 47671642 | 0   |
| CEU | chr2  | RGPD1 | 81963577 | 0   |
| CEU | chr2  | RGPD1 | 82013577 | 0   |
| CEU | chr2  | RGPD1 | 82063577 | 0   |
| CEU | chr2  | RGPD1 | 82113577 | 0   |
| CEU | chr2  | RGPD1 | 82163577 | 0   |
| CEU | chr2  | RGPD1 | 82213577 | 0   |
| CEU | chr2  | RGPD1 | 82263577 | 0   |
| CEU | chr2  | RGPD1 | 82313577 | 0   |
| CEU | chr2  | RGPD1 | 82363577 | 0   |
| CEU | chr2  | RGPD1 | 82413577 | 0   |
| CEU | chr2  | RGPD1 | 82463577 | 0   |
| CEU | chr2  | RGPD1 | 82513577 | 0   |
| CEU | chr2  | RGPD1 | 82563577 | 0   |
| CEU | chr2  | RGPD1 | 82613577 | 0   |
| CEU | chr2  | RGPD1 | 82663577 | 0   |
| CEU | chr2  | RGPD1 | 82713577 | 0   |
| CEU | chr2  | RGPD1 | 82763577 | 0   |
| CEU | chr2  | RGPD1 | 82813577 | 0   |
| CEU | chr2  | RGPD1 | 82863577 | 0   |

3\_Introgression\_data

|     |      |       |          |    |
|-----|------|-------|----------|----|
| CEU | chr2 | RGPD1 | 82913577 | 0  |
| CEU | chr2 | RGPD1 | 82963577 | 0  |
| CEU | chr2 | RGPD1 | 83013577 | 0  |
| CEU | chr2 | RGPD1 | 83063577 | 0  |
| CEU | chr2 | RGPD1 | 83113577 | 0  |
| CEU | chr2 | RGPD1 | 83163577 | 0  |
| CEU | chr2 | RGPD1 | 83213577 | 0  |
| CEU | chr2 | RGPD1 | 83263577 | 0  |
| CEU | chr2 | RGPD1 | 83313577 | 0  |
| CEU | chr2 | RGPD1 | 83363577 | 0  |
| CEU | chr2 | RGPD1 | 83413577 | 0  |
| CEU | chr2 | RGPD1 | 83463577 | 0  |
| CEU | chr2 | RGPD1 | 83513577 | 0  |
| CEU | chr2 | RGPD1 | 83563577 | 0  |
| CEU | chr2 | RGPD1 | 83613577 | 0  |
| CEU | chr2 | RGPD1 | 83663577 | 0  |
| CEU | chr2 | RGPD1 | 83713577 | 0  |
| CEU | chr2 | RGPD1 | 83763577 | 0  |
| CEU | chr2 | RGPD1 | 83813577 | 0  |
| CEU | chr2 | RGPD1 | 83863577 | 0  |
| CEU | chr2 | RGPD1 | 83913577 | 0  |
| CEU | chr2 | RGPD1 | 83963577 | 0  |
| CEU | chr2 | RGPD1 | 84013577 | 0  |
| CEU | chr2 | RGPD1 | 84063577 | 0  |
| CEU | chr2 | RGPD1 | 84113577 | 0  |
| CEU | chr2 | RGPD1 | 84163577 | 0  |
| CEU | chr2 | RGPD1 | 84213577 | 0  |
| CEU | chr2 | RGPD1 | 84263577 | 0  |
| CEU | chr2 | RGPD1 | 84313577 | 0  |
| CEU | chr2 | RGPD1 | 84363577 | 0  |
| CEU | chr2 | RGPD1 | 84413577 | 0  |
| CEU | chr2 | RGPD1 | 84463577 | 0  |
| CEU | chr2 | RGPD1 | 84513577 | 10 |
| CEU | chr2 | RGPD1 | 84563577 | 24 |
| CEU | chr2 | RGPD1 | 84613577 | 39 |
| CEU | chr2 | RGPD1 | 84663577 | 40 |
| CEU | chr2 | RGPD1 | 84713577 | 26 |
| CEU | chr2 | RGPD1 | 84763577 | 23 |
| CEU | chr2 | RGPD1 | 84813577 | 29 |
| CEU | chr2 | RGPD1 | 84863577 | 33 |
| CEU | chr2 | RGPD1 | 84913577 | 32 |
| CEU | chr2 | RGPD1 | 84963577 | 41 |
| CEU | chr2 | RGPD1 | 85013577 | 38 |
| CEU | chr2 | RGPD1 | 85063577 | 53 |
| CEU | chr2 | RGPD1 | 85113577 | 40 |
| CEU | chr2 | RGPD1 | 85163577 | 0  |
| CEU | chr2 | RGPD1 | 85213577 | 0  |
| CEU | chr2 | RGPD1 | 85263577 | 0  |
| CEU | chr2 | RGPD1 | 85313577 | 0  |

## 3\_Introgression\_data

|     |      |       |          |    |
|-----|------|-------|----------|----|
| CEU | chr2 | RGPD1 | 85363577 | 24 |
| CEU | chr2 | RGPD1 | 85413577 | 36 |
| CEU | chr2 | RGPD1 | 85463577 | 38 |
| CEU | chr2 | RGPD1 | 85513577 | 26 |
| CEU | chr2 | RGPD1 | 85563577 | 0  |
| CEU | chr2 | RGPD1 | 85613577 | 0  |
| CEU | chr2 | RGPD1 | 85663577 | 0  |
| CEU | chr2 | RGPD1 | 85713577 | 0  |
| CEU | chr2 | RGPD1 | 85763577 | 0  |
| CEU | chr2 | RGPD1 | 85813577 | 0  |
| CEU | chr2 | RGPD1 | 85863577 | 0  |
| CEU | chr2 | RGPD1 | 85913577 | 0  |
| CEU | chr2 | RGPD1 | 85963577 | 0  |
| CEU | chr2 | RGPD1 | 86013577 | 22 |
| CEU | chr2 | RGPD1 | 86063577 | 39 |
| CEU | chr2 | RGPD1 | 86113577 | 41 |
| CEU | chr2 | RGPD1 | 86163577 | 30 |
| CEU | chr2 | RGPD1 | 86213577 | 6  |
| CEU | chr2 | RGPD1 | 86263577 | 2  |
| CEU | chr2 | RGPD1 | 86313577 | 11 |
| CEU | chr2 | RGPD1 | 86363577 | 19 |
| CEU | chr2 | RGPD1 | 86413577 | 37 |
| CEU | chr2 | RGPD1 | 86463577 | 36 |
| CEU | chr2 | RGPD1 | 86513577 | 47 |
| CEU | chr2 | RGPD1 | 86563577 | 62 |
| CEU | chr2 | RGPD1 | 86613577 | 39 |
| CEU | chr2 | RGPD1 | 86663577 | 15 |
| CEU | chr2 | RGPD1 | 86713577 | 0  |
| CEU | chr2 | RGPD1 | 86763577 | 0  |
| CEU | chr2 | RGPD1 | 86813577 | 0  |
| CEU | chr2 | RGPD1 | 86863577 | 0  |
| CEU | chr2 | RGPD1 | 86913577 | 0  |
| CEU | chr2 | RGPD1 | 86963577 | 0  |
| CEU | chr2 | RGPD1 | 87013577 | 0  |
| CEU | chr2 | RGPD1 | 87063577 | 0  |
| CEU | chr2 | RGPD1 | 87113577 | 0  |
| CEU | chr2 | RGPD1 | 87163577 | 0  |
| CEU | chr2 | RGPD1 | 87213577 | 0  |
| CEU | chr2 | RGPD1 | 87263577 | 0  |
| CEU | chr2 | RGPD1 | 87313577 | 0  |
| CEU | chr2 | RGPD1 | 87363577 | 0  |
| CEU | chr2 | RGPD1 | 87413577 | 0  |
| CEU | chr2 | RGPD1 | 87463577 | 0  |
| CEU | chr2 | RGPD1 | 87513577 | 0  |
| CEU | chr2 | RGPD1 | 87563577 | 0  |
| CEU | chr2 | RGPD1 | 87613577 | 0  |
| CEU | chr2 | RGPD1 | 87663577 | 0  |
| CEU | chr2 | RGPD1 | 87713577 | 0  |
| CEU | chr2 | RGPD1 | 87763577 | 0  |

## 3\_Introgression\_data

|     |      |       |          |    |
|-----|------|-------|----------|----|
| CEU | chr2 | RGPD1 | 87813577 | 14 |
| CEU | chr2 | RGPD1 | 87863577 | 24 |
| CEU | chr2 | RGPD1 | 87913577 | 31 |
| CEU | chr2 | RGPD1 | 87963577 | 42 |
| CEU | chr2 | RGPD1 | 88013577 | 29 |
| CEU | chr2 | RGPD1 | 88063577 | 8  |
| CEU | chr2 | RGPD1 | 88113577 | 0  |
| CEU | chr2 | RGPD1 | 88163577 | 0  |
| CEU | chr2 | RGPD1 | 88213577 | 0  |
| CEU | chr2 | RGPD1 | 88263577 | 0  |
| CEU | chr2 | RGPD1 | 88313577 | 0  |
| CEU | chr2 | RGPD1 | 88363577 | 0  |
| CEU | chr2 | RGPD1 | 88413577 | 0  |
| CEU | chr2 | RGPD1 | 88463577 | 0  |
| CEU | chr2 | RGPD1 | 88513577 | 0  |
| CEU | chr2 | RGPD1 | 88563577 | 0  |
| CEU | chr2 | RGPD1 | 88613577 | 0  |
| CEU | chr2 | RGPD1 | 88663577 | 0  |
| CEU | chr2 | RGPD1 | 88713577 | 0  |
| CEU | chr2 | RGPD1 | 88763577 | 0  |
| CEU | chr2 | RGPD1 | 88813577 | 0  |
| CEU | chr2 | RGPD1 | 88863577 | 0  |
| CEU | chr2 | RGPD1 | 88913577 | 0  |
| CEU | chr2 | RGPD1 | 88963577 | 0  |
| CEU | chr2 | RGPD1 | 89013577 | 0  |
| CEU | chr2 | RGPD1 | 89063577 | 0  |
| CEU | chr2 | RGPD1 | 89113577 | 0  |
| CEU | chr2 | RGPD1 | 89163577 | 0  |
| CEU | chr2 | RGPD1 | 89213577 | 10 |
| CEU | chr2 | RGPD1 | 89263577 | 20 |
| CEU | chr2 | RGPD1 | 89313577 | 14 |
| CEU | chr2 | RGPD1 | 89363577 | 4  |
| CEU | chr2 | RGPD1 | 89413577 | 0  |
| CEU | chr2 | RGPD1 | 89463577 | 0  |
| CEU | chr2 | RGPD1 | 89513577 | 0  |
| CEU | chr2 | RGPD1 | 89563577 | 0  |
| CEU | chr2 | RGPD1 | 89613577 | 0  |
| CEU | chr2 | RGPD1 | 89663577 | 0  |
| CEU | chr2 | RGPD1 | 89713577 | 0  |
| CEU | chr2 | RGPD1 | 89763577 | 0  |
| CEU | chr2 | RGPD1 | 89813577 | 0  |
| CEU | chr2 | RGPD1 | 89863577 | 0  |
| CEU | chr2 | RGPD1 | 89913577 | 0  |
| CEU | chr2 | RGPD1 | 89963577 | 0  |
| CEU | chr2 | RGPD1 | 90013577 | 0  |
| CEU | chr2 | RGPD1 | 90063577 | 0  |
| CEU | chr2 | RGPD1 | 90113577 | 0  |
| CEU | chr2 | RGPD1 | 90163577 | 0  |
| CEU | chr2 | RGPD1 | 90213577 | 0  |

## 3\_Introgression\_data

|     |      |        |          |   |
|-----|------|--------|----------|---|
| CEU | chr2 | RGPD1  | 90263577 | 0 |
| CEU | chr2 | RGPD1  | 90313577 | 0 |
| CEU | chr2 | RGPD1  | 90363577 | 0 |
| CEU | chr2 | RGPD1  | 90413577 | 0 |
| CEU | chr2 | RGPD1  | 90463577 | 0 |
| CEU | chr2 | RGPD1  | 90513577 | 0 |
| CEU | chr2 | RGPD1  | 90563577 | 0 |
| CEU | chr2 | RGPD1  | 90613577 | 0 |
| CEU | chr2 | RGPD1  | 90663577 | 0 |
| CEU | chr2 | RGPD1  | 90713577 | 0 |
| CEU | chr2 | RGPD1  | 90763577 | 0 |
| CEU | chr2 | RGPD1  | 90813577 | 0 |
| CEU | chr2 | RGPD1  | 90863577 | 0 |
| CEU | chr2 | RGPD1  | 90913577 | 0 |
| CEU | chr2 | RGPD1  | 90963577 | 0 |
| CEU | chr2 | RGPD1  | 91013577 | 0 |
| CEU | chr2 | RGPD1  | 91063577 | 0 |
| CEU | chr2 | RGPD1  | 91113577 | 0 |
| CEU | chr2 | RGPD1  | 91163577 | 0 |
| CEU | chr2 | RGPD1  | 91213577 | 0 |
| CEU | chr2 | RGPD1  | 91263577 | 0 |
| CEU | chr2 | RGPD1  | 91313577 | 0 |
| CEU | chr2 | RGPD1  | 91363577 | 0 |
| CEU | chr2 | RGPD1  | 91413577 | 0 |
| CEU | chr2 | RGPD1  | 91463577 | 0 |
| CEU | chr2 | RGPD1  | 91513577 | 0 |
| CEU | chr2 | RGPD1  | 91563577 | 0 |
| CEU | chr2 | RGPD1  | 91613577 | 0 |
| CEU | chr2 | RGPD1  | 91663577 | 0 |
| CEU | chr2 | RGPD1  | 91713577 | 0 |
| CEU | chr2 | RGPD1  | 91763577 | 0 |
| CEU | chr2 | RGPD1  | 91813577 | 0 |
| CEU | chr2 | RGPD1  | 91863577 | 0 |
| CEU | chr2 | RGPD1  | 91913577 | 0 |
| CEU | chr2 | RGPD1  | 91963577 | 0 |
| CEU | chr7 | SPDYE3 | 95356798 | 0 |
| CEU | chr7 | SPDYE3 | 95406798 | 0 |
| CEU | chr7 | SPDYE3 | 95456798 | 0 |
| CEU | chr7 | SPDYE3 | 95506798 | 0 |
| CEU | chr7 | SPDYE3 | 95556798 | 0 |
| CEU | chr7 | SPDYE3 | 95606798 | 0 |
| CEU | chr7 | SPDYE3 | 95656798 | 0 |
| CEU | chr7 | SPDYE3 | 95706798 | 0 |
| CEU | chr7 | SPDYE3 | 95756798 | 0 |
| CEU | chr7 | SPDYE3 | 95806798 | 0 |
| CEU | chr7 | SPDYE3 | 95856798 | 0 |
| CEU | chr7 | SPDYE3 | 95906798 | 0 |
| CEU | chr7 | SPDYE3 | 95956798 | 0 |
| CEU | chr7 | SPDYE3 | 96006798 | 0 |

## 3\_Introgression\_data

|     |      |        |          |   |
|-----|------|--------|----------|---|
| CEU | chr7 | SPDYE3 | 96056798 | 0 |
| CEU | chr7 | SPDYE3 | 96106798 | 0 |
| CEU | chr7 | SPDYE3 | 96156798 | 0 |
| CEU | chr7 | SPDYE3 | 96206798 | 0 |
| CEU | chr7 | SPDYE3 | 96256798 | 0 |
| CEU | chr7 | SPDYE3 | 96306798 | 0 |
| CEU | chr7 | SPDYE3 | 96356798 | 0 |
| CEU | chr7 | SPDYE3 | 96406798 | 0 |
| CEU | chr7 | SPDYE3 | 96456798 | 0 |
| CEU | chr7 | SPDYE3 | 96506798 | 0 |
| CEU | chr7 | SPDYE3 | 96556798 | 0 |
| CEU | chr7 | SPDYE3 | 96606798 | 0 |
| CEU | chr7 | SPDYE3 | 96656798 | 0 |
| CEU | chr7 | SPDYE3 | 96706798 | 0 |
| CEU | chr7 | SPDYE3 | 96756798 | 0 |
| CEU | chr7 | SPDYE3 | 96806798 | 0 |
| CEU | chr7 | SPDYE3 | 96856798 | 0 |
| CEU | chr7 | SPDYE3 | 96906798 | 0 |
| CEU | chr7 | SPDYE3 | 96956798 | 0 |
| CEU | chr7 | SPDYE3 | 97006798 | 0 |
| CEU | chr7 | SPDYE3 | 97056798 | 0 |
| CEU | chr7 | SPDYE3 | 97106798 | 0 |
| CEU | chr7 | SPDYE3 | 97156798 | 0 |
| CEU | chr7 | SPDYE3 | 97206798 | 0 |
| CEU | chr7 | SPDYE3 | 97256798 | 0 |
| CEU | chr7 | SPDYE3 | 97306798 | 0 |
| CEU | chr7 | SPDYE3 | 97356798 | 0 |
| CEU | chr7 | SPDYE3 | 97406798 | 0 |
| CEU | chr7 | SPDYE3 | 97456798 | 0 |
| CEU | chr7 | SPDYE3 | 97506798 | 0 |
| CEU | chr7 | SPDYE3 | 97556798 | 0 |
| CEU | chr7 | SPDYE3 | 97606798 | 0 |
| CEU | chr7 | SPDYE3 | 97656798 | 0 |
| CEU | chr7 | SPDYE3 | 97706798 | 0 |
| CEU | chr7 | SPDYE3 | 97756798 | 0 |
| CEU | chr7 | SPDYE3 | 97806798 | 0 |
| CEU | chr7 | SPDYE3 | 97856798 | 0 |
| CEU | chr7 | SPDYE3 | 97906798 | 0 |
| CEU | chr7 | SPDYE3 | 97956798 | 0 |
| CEU | chr7 | SPDYE3 | 98006798 | 0 |
| CEU | chr7 | SPDYE3 | 98056798 | 0 |
| CEU | chr7 | SPDYE3 | 98106798 | 0 |
| CEU | chr7 | SPDYE3 | 98156798 | 0 |
| CEU | chr7 | SPDYE3 | 98206798 | 0 |
| CEU | chr7 | SPDYE3 | 98256798 | 0 |
| CEU | chr7 | SPDYE3 | 98306798 | 0 |
| CEU | chr7 | SPDYE3 | 98356798 | 0 |
| CEU | chr7 | SPDYE3 | 98406798 | 0 |
| CEU | chr7 | SPDYE3 | 98456798 | 0 |



## 3\_Introgression\_data

|     |      |        |           |   |
|-----|------|--------|-----------|---|
| CEU | chr7 | SPDYE3 | 98506798  | 0 |
| CEU | chr7 | SPDYE3 | 98556798  | 0 |
| CEU | chr7 | SPDYE3 | 98606798  | 0 |
| CEU | chr7 | SPDYE3 | 98656798  | 0 |
| CEU | chr7 | SPDYE3 | 98706798  | 0 |
| CEU | chr7 | SPDYE3 | 98756798  | 0 |
| CEU | chr7 | SPDYE3 | 98806798  | 0 |
| CEU | chr7 | SPDYE3 | 98856798  | 0 |
| CEU | chr7 | SPDYE3 | 98906798  | 0 |
| CEU | chr7 | SPDYE3 | 98956798  | 0 |
| CEU | chr7 | SPDYE3 | 99006798  | 0 |
| CEU | chr7 | SPDYE3 | 99056798  | 0 |
| CEU | chr7 | SPDYE3 | 99106798  | 0 |
| CEU | chr7 | SPDYE3 | 99156798  | 0 |
| CEU | chr7 | SPDYE3 | 99206798  | 0 |
| CEU | chr7 | SPDYE3 | 99256798  | 0 |
| CEU | chr7 | SPDYE3 | 99306798  | 0 |
| CEU | chr7 | SPDYE3 | 99356798  | 0 |
| CEU | chr7 | SPDYE3 | 99406798  | 0 |
| CEU | chr7 | SPDYE3 | 99456798  | 0 |
| CEU | chr7 | SPDYE3 | 99506798  | 0 |
| CEU | chr7 | SPDYE3 | 99556798  | 0 |
| CEU | chr7 | SPDYE3 | 99606798  | 0 |
| CEU | chr7 | SPDYE3 | 99656798  | 0 |
| CEU | chr7 | SPDYE3 | 99706798  | 0 |
| CEU | chr7 | SPDYE3 | 99756798  | 0 |
| CEU | chr7 | SPDYE3 | 99806798  | 0 |
| CEU | chr7 | SPDYE3 | 99856798  | 0 |
| CEU | chr7 | SPDYE3 | 99906798  | 0 |
| CEU | chr7 | SPDYE3 | 99956798  | 0 |
| CEU | chr7 | SPDYE3 | 100006798 | 0 |
| CEU | chr7 | SPDYE3 | 100056798 | 0 |
| CEU | chr7 | SPDYE3 | 100106798 | 0 |
| CEU | chr7 | SPDYE3 | 100156798 | 0 |
| CEU | chr7 | SPDYE3 | 100206798 | 0 |
| CEU | chr7 | SPDYE3 | 100256798 | 0 |
| CEU | chr7 | SPDYE3 | 100306798 | 0 |
| CEU | chr7 | SPDYE3 | 100356798 | 0 |
| CEU | chr7 | SPDYE3 | 100406798 | 0 |
| CEU | chr7 | SPDYE3 | 100456798 | 0 |
| CEU | chr7 | SPDYE3 | 100506798 | 0 |
| CEU | chr7 | SPDYE3 | 100556798 | 0 |
| CEU | chr7 | SPDYE3 | 100606798 | 0 |
| CEU | chr7 | SPDYE3 | 100656798 | 0 |
| CEU | chr7 | SPDYE3 | 100706798 | 0 |
| CEU | chr7 | SPDYE3 | 100756798 | 0 |
| CEU | chr7 | SPDYE3 | 100806798 | 0 |
| CEU | chr7 | SPDYE3 | 100856798 | 0 |
| CEU | chr7 | SPDYE3 | 100906798 | 0 |

3\_Introgression\_data

|     |      |        |           |    |
|-----|------|--------|-----------|----|
| CEU | chr7 | SPDYE3 | 100956798 | 0  |
| CEU | chr7 | SPDYE3 | 101006798 | 0  |
| CEU | chr7 | SPDYE3 | 101056798 | 0  |
| CEU | chr7 | SPDYE3 | 101106798 | 0  |
| CEU | chr7 | SPDYE3 | 101156798 | 0  |
| CEU | chr7 | SPDYE3 | 101206798 | 0  |
| CEU | chr7 | SPDYE3 | 101256798 | 0  |
| CEU | chr7 | SPDYE3 | 101306798 | 42 |
| CEU | chr7 | SPDYE3 | 101356798 | 57 |
| CEU | chr7 | SPDYE3 | 101406798 | 15 |
| CEU | chr7 | SPDYE3 | 101456798 | 0  |
| CEU | chr7 | SPDYE3 | 101506798 | 0  |
| CEU | chr7 | SPDYE3 | 101556798 | 0  |
| CEU | chr7 | SPDYE3 | 101606798 | 0  |
| CEU | chr7 | SPDYE3 | 101656798 | 0  |
| CEU | chr7 | SPDYE3 | 101706798 | 0  |
| CEU | chr7 | SPDYE3 | 101756798 | 0  |
| CEU | chr7 | SPDYE3 | 101806798 | 0  |
| CEU | chr7 | SPDYE3 | 101856798 | 0  |
| CEU | chr7 | SPDYE3 | 101906798 | 0  |
| CEU | chr7 | SPDYE3 | 101956798 | 0  |
| CEU | chr7 | SPDYE3 | 102006798 | 0  |
| CEU | chr7 | SPDYE3 | 102056798 | 0  |
| CEU | chr7 | SPDYE3 | 102106798 | 0  |
| CEU | chr7 | SPDYE3 | 102156798 | 0  |
| CEU | chr7 | SPDYE3 | 102206798 | 0  |
| CEU | chr7 | SPDYE3 | 102256798 | 0  |
| CEU | chr7 | SPDYE3 | 102306798 | 0  |
| CEU | chr7 | SPDYE3 | 102356798 | 0  |
| CEU | chr7 | SPDYE3 | 102406798 | 0  |
| CEU | chr7 | SPDYE3 | 102456798 | 0  |
| CEU | chr7 | SPDYE3 | 102506798 | 0  |
| CEU | chr7 | SPDYE3 | 102556798 | 0  |
| CEU | chr7 | SPDYE3 | 102606798 | 0  |
| CEU | chr7 | SPDYE3 | 102656798 | 0  |
| CEU | chr7 | SPDYE3 | 102706798 | 0  |
| CEU | chr7 | SPDYE3 | 102756798 | 0  |
| CEU | chr7 | SPDYE3 | 102806798 | 0  |
| CEU | chr7 | SPDYE3 | 102856798 | 0  |
| CEU | chr7 | SPDYE3 | 102906798 | 0  |
| CEU | chr7 | SPDYE3 | 102956798 | 0  |
| CEU | chr7 | SPDYE3 | 103006798 | 0  |
| CEU | chr7 | SPDYE3 | 103056798 | 0  |
| CEU | chr7 | SPDYE3 | 103106798 | 0  |
| CEU | chr7 | SPDYE3 | 103156798 | 0  |
| CEU | chr7 | SPDYE3 | 103206798 | 0  |
| CEU | chr7 | SPDYE3 | 103256798 | 0  |
| CEU | chr7 | SPDYE3 | 103306798 | 0  |
| CEU | chr7 | SPDYE3 | 103356798 | 0  |

## 3\_Introgression\_data

|     |       |         |           |   |
|-----|-------|---------|-----------|---|
| CEU | chr7  | SPDYE3  | 103406798 | 0 |
| CEU | chr7  | SPDYE3  | 103456798 | 0 |
| CEU | chr7  | SPDYE3  | 103506798 | 0 |
| CEU | chr7  | SPDYE3  | 103556798 | 0 |
| CEU | chr7  | SPDYE3  | 103606798 | 0 |
| CEU | chr7  | SPDYE3  | 103656798 | 0 |
| CEU | chr7  | SPDYE3  | 103706798 | 0 |
| CEU | chr7  | SPDYE3  | 103756798 | 0 |
| CEU | chr7  | SPDYE3  | 103806798 | 0 |
| CEU | chr7  | SPDYE3  | 103856798 | 0 |
| CEU | chr7  | SPDYE3  | 103906798 | 0 |
| CEU | chr7  | SPDYE3  | 103956798 | 0 |
| CEU | chr7  | SPDYE3  | 104006798 | 0 |
| CEU | chr7  | SPDYE3  | 104056798 | 0 |
| CEU | chr7  | SPDYE3  | 104106798 | 0 |
| CEU | chr7  | SPDYE3  | 104156798 | 0 |
| CEU | chr7  | SPDYE3  | 104206798 | 0 |
| CEU | chr7  | SPDYE3  | 104256798 | 0 |
| CEU | chr7  | SPDYE3  | 104306798 | 0 |
| CEU | chr7  | SPDYE3  | 104356798 | 0 |
| CEU | chr7  | SPDYE3  | 104406798 | 0 |
| CEU | chr7  | SPDYE3  | 104456798 | 0 |
| CEU | chr7  | SPDYE3  | 104506798 | 0 |
| CEU | chr7  | SPDYE3  | 104556798 | 0 |
| CEU | chr7  | SPDYE3  | 104606798 | 0 |
| CEU | chr7  | SPDYE3  | 104656798 | 0 |
| CEU | chr7  | SPDYE3  | 104706798 | 0 |
| CEU | chr7  | SPDYE3  | 104756798 | 0 |
| CEU | chr7  | SPDYE3  | 104806798 | 0 |
| CEU | chr7  | SPDYE3  | 104856798 | 0 |
| CEU | chr7  | SPDYE3  | 104906798 | 0 |
| CEU | chr7  | SPDYE3  | 104956798 | 0 |
| CEU | chr7  | SPDYE3  | 105006798 | 0 |
| CEU | chr7  | SPDYE3  | 105056798 | 0 |
| CEU | chr7  | SPDYE3  | 105106798 | 0 |
| CEU | chr7  | SPDYE3  | 105156798 | 0 |
| CEU | chr7  | SPDYE3  | 105206798 | 0 |
| CEU | chr7  | SPDYE3  | 105256798 | 0 |
| CEU | chr16 | SULT1A3 | 25249255  | 0 |
| CEU | chr16 | SULT1A3 | 25299255  | 0 |
| CEU | chr16 | SULT1A3 | 25349255  | 0 |
| CEU | chr16 | SULT1A3 | 25399255  | 0 |
| CEU | chr16 | SULT1A3 | 25449255  | 0 |
| CEU | chr16 | SULT1A3 | 25499255  | 0 |
| CEU | chr16 | SULT1A3 | 25549255  | 0 |
| CEU | chr16 | SULT1A3 | 25599255  | 0 |
| CEU | chr16 | SULT1A3 | 25649255  | 0 |
| CEU | chr16 | SULT1A3 | 25699255  | 0 |
| CEU | chr16 | SULT1A3 | 25749255  | 0 |

## 3\_Introgression\_data

|     |       |         |          |    |
|-----|-------|---------|----------|----|
| CEU | chr16 | SULT1A3 | 25799255 | 0  |
| CEU | chr16 | SULT1A3 | 25849255 | 0  |
| CEU | chr16 | SULT1A3 | 25899255 | 8  |
| CEU | chr16 | SULT1A3 | 25949255 | 46 |
| CEU | chr16 | SULT1A3 | 25999255 | 38 |
| CEU | chr16 | SULT1A3 | 26049255 | 0  |
| CEU | chr16 | SULT1A3 | 26099255 | 0  |
| CEU | chr16 | SULT1A3 | 26149255 | 0  |
| CEU | chr16 | SULT1A3 | 26199255 | 0  |
| CEU | chr16 | SULT1A3 | 26249255 | 0  |
| CEU | chr16 | SULT1A3 | 26299255 | 0  |
| CEU | chr16 | SULT1A3 | 26349255 | 0  |
| CEU | chr16 | SULT1A3 | 26399255 | 0  |
| CEU | chr16 | SULT1A3 | 26449255 | 0  |
| CEU | chr16 | SULT1A3 | 26499255 | 0  |
| CEU | chr16 | SULT1A3 | 26549255 | 0  |
| CEU | chr16 | SULT1A3 | 26599255 | 0  |
| CEU | chr16 | SULT1A3 | 26649255 | 0  |
| CEU | chr16 | SULT1A3 | 26699255 | 0  |
| CEU | chr16 | SULT1A3 | 26749255 | 0  |
| CEU | chr16 | SULT1A3 | 26799255 | 0  |
| CEU | chr16 | SULT1A3 | 26849255 | 0  |
| CEU | chr16 | SULT1A3 | 26899255 | 0  |
| CEU | chr16 | SULT1A3 | 26949255 | 0  |
| CEU | chr16 | SULT1A3 | 26999255 | 0  |
| CEU | chr16 | SULT1A3 | 27049255 | 0  |
| CEU | chr16 | SULT1A3 | 27099255 | 0  |
| CEU | chr16 | SULT1A3 | 27149255 | 0  |
| CEU | chr16 | SULT1A3 | 27199255 | 0  |
| CEU | chr16 | SULT1A3 | 27249255 | 0  |
| CEU | chr16 | SULT1A3 | 27299255 | 0  |
| CEU | chr16 | SULT1A3 | 27349255 | 0  |
| CEU | chr16 | SULT1A3 | 27399255 | 0  |
| CEU | chr16 | SULT1A3 | 27449255 | 0  |
| CEU | chr16 | SULT1A3 | 27499255 | 0  |
| CEU | chr16 | SULT1A3 | 27549255 | 0  |
| CEU | chr16 | SULT1A3 | 27599255 | 0  |
| CEU | chr16 | SULT1A3 | 27649255 | 0  |
| CEU | chr16 | SULT1A3 | 27699255 | 0  |
| CEU | chr16 | SULT1A3 | 27749255 | 0  |
| CEU | chr16 | SULT1A3 | 27799255 | 0  |
| CEU | chr16 | SULT1A3 | 27849255 | 0  |
| CEU | chr16 | SULT1A3 | 27899255 | 0  |
| CEU | chr16 | SULT1A3 | 27949255 | 0  |
| CEU | chr16 | SULT1A3 | 27999255 | 0  |
| CEU | chr16 | SULT1A3 | 28049255 | 0  |
| CEU | chr16 | SULT1A3 | 28099255 | 0  |
| CEU | chr16 | SULT1A3 | 28149255 | 0  |
| CEU | chr16 | SULT1A3 | 28199255 | 0  |

## 3\_Introgression\_data

|     |       |         |          |   |
|-----|-------|---------|----------|---|
| CEU | chr16 | SULT1A3 | 28249255 | 0 |
| CEU | chr16 | SULT1A3 | 28299255 | 0 |
| CEU | chr16 | SULT1A3 | 28349255 | 0 |
| CEU | chr16 | SULT1A3 | 28399255 | 0 |
| CEU | chr16 | SULT1A3 | 28449255 | 0 |
| CEU | chr16 | SULT1A3 | 28499255 | 0 |
| CEU | chr16 | SULT1A3 | 28549255 | 0 |
| CEU | chr16 | SULT1A3 | 28599255 | 0 |
| CEU | chr16 | SULT1A3 | 28649255 | 0 |
| CEU | chr16 | SULT1A3 | 28699255 | 0 |
| CEU | chr16 | SULT1A3 | 28749255 | 0 |
| CEU | chr16 | SULT1A3 | 28799255 | 0 |
| CEU | chr16 | SULT1A3 | 28849255 | 0 |
| CEU | chr16 | SULT1A3 | 28899255 | 0 |
| CEU | chr16 | SULT1A3 | 28949255 | 0 |
| CEU | chr16 | SULT1A3 | 28999255 | 0 |
| CEU | chr16 | SULT1A3 | 29049255 | 0 |
| CEU | chr16 | SULT1A3 | 29099255 | 0 |
| CEU | chr16 | SULT1A3 | 29149255 | 0 |
| CEU | chr16 | SULT1A3 | 29199255 | 0 |
| CEU | chr16 | SULT1A3 | 29249255 | 0 |
| CEU | chr16 | SULT1A3 | 29299255 | 0 |
| CEU | chr16 | SULT1A3 | 29349255 | 0 |
| CEU | chr16 | SULT1A3 | 29399255 | 0 |
| CEU | chr16 | SULT1A3 | 29449255 | 0 |
| CEU | chr16 | SULT1A3 | 29499255 | 0 |
| CEU | chr16 | SULT1A3 | 29549255 | 0 |
| CEU | chr16 | SULT1A3 | 29599255 | 0 |
| CEU | chr16 | SULT1A3 | 29649255 | 0 |
| CEU | chr16 | SULT1A3 | 29699255 | 0 |
| CEU | chr16 | SULT1A3 | 29749255 | 0 |
| CEU | chr16 | SULT1A3 | 29799255 | 0 |
| CEU | chr16 | SULT1A3 | 29849255 | 0 |
| CEU | chr16 | SULT1A3 | 29899255 | 0 |
| CEU | chr16 | SULT1A3 | 29949255 | 0 |
| CEU | chr16 | SULT1A3 | 29999255 | 0 |
| CEU | chr16 | SULT1A3 | 30049255 | 0 |
| CEU | chr16 | SULT1A3 | 30099255 | 0 |
| CEU | chr16 | SULT1A3 | 30149255 | 0 |
| CEU | chr16 | SULT1A3 | 30199255 | 0 |
| CEU | chr16 | SULT1A3 | 30249255 | 0 |
| CEU | chr16 | SULT1A3 | 30299255 | 0 |
| CEU | chr16 | SULT1A3 | 30349255 | 0 |
| CEU | chr16 | SULT1A3 | 30399255 | 0 |
| CEU | chr16 | SULT1A3 | 30449255 | 0 |
| CEU | chr16 | SULT1A3 | 30499255 | 0 |
| CEU | chr16 | SULT1A3 | 30549255 | 0 |
| CEU | chr16 | SULT1A3 | 30599255 | 0 |
| CEU | chr16 | SULT1A3 | 30649255 | 0 |

## 3\_Introgression\_data

|     |       |         |          |   |
|-----|-------|---------|----------|---|
| CEU | chr16 | SULT1A3 | 30699255 | 0 |
| CEU | chr16 | SULT1A3 | 30749255 | 0 |
| CEU | chr16 | SULT1A3 | 30799255 | 0 |
| CEU | chr16 | SULT1A3 | 30849255 | 0 |
| CEU | chr16 | SULT1A3 | 30899255 | 0 |
| CEU | chr16 | SULT1A3 | 30949255 | 0 |
| CEU | chr16 | SULT1A3 | 30999255 | 0 |
| CEU | chr16 | SULT1A3 | 31049255 | 0 |
| CEU | chr16 | SULT1A3 | 31099255 | 0 |
| CEU | chr16 | SULT1A3 | 31149255 | 0 |
| CEU | chr16 | SULT1A3 | 31199255 | 0 |
| CEU | chr16 | SULT1A3 | 31249255 | 0 |
| CEU | chr16 | SULT1A3 | 31299255 | 0 |
| CEU | chr16 | SULT1A3 | 31349255 | 0 |
| CEU | chr16 | SULT1A3 | 31399255 | 0 |
| CEU | chr16 | SULT1A3 | 31449255 | 0 |
| CEU | chr16 | SULT1A3 | 31499255 | 0 |
| CEU | chr16 | SULT1A3 | 31549255 | 0 |
| CEU | chr16 | SULT1A3 | 31599255 | 0 |
| CEU | chr16 | SULT1A3 | 31649255 | 0 |
| CEU | chr16 | SULT1A3 | 31699255 | 0 |
| CEU | chr16 | SULT1A3 | 31749255 | 0 |
| CEU | chr16 | SULT1A3 | 31799255 | 0 |
| CEU | chr16 | SULT1A3 | 31849255 | 0 |
| CEU | chr16 | SULT1A3 | 31899255 | 0 |
| CEU | chr16 | SULT1A3 | 31949255 | 0 |
| CEU | chr16 | SULT1A3 | 31999255 | 0 |
| CEU | chr16 | SULT1A3 | 32049255 | 0 |
| CEU | chr16 | SULT1A3 | 32099255 | 0 |
| CEU | chr16 | SULT1A3 | 32149255 | 0 |
| CEU | chr16 | SULT1A3 | 32199255 | 0 |
| CEU | chr16 | SULT1A3 | 32249255 | 0 |
| CEU | chr16 | SULT1A3 | 32299255 | 0 |
| CEU | chr16 | SULT1A3 | 32349255 | 0 |
| CEU | chr16 | SULT1A3 | 32399255 | 0 |
| CEU | chr16 | SULT1A3 | 32449255 | 0 |
| CEU | chr16 | SULT1A3 | 32499255 | 0 |
| CEU | chr16 | SULT1A3 | 32549255 | 0 |
| CEU | chr16 | SULT1A3 | 32599255 | 0 |
| CEU | chr16 | SULT1A3 | 32649255 | 0 |
| CEU | chr16 | SULT1A3 | 32699255 | 0 |
| CEU | chr16 | SULT1A3 | 32749255 | 0 |
| CEU | chr16 | SULT1A3 | 32799255 | 0 |
| CEU | chr16 | SULT1A3 | 32849255 | 0 |
| CEU | chr16 | SULT1A3 | 32899255 | 0 |
| CEU | chr16 | SULT1A3 | 32949255 | 0 |
| CEU | chr16 | SULT1A3 | 32999255 | 0 |
| CEU | chr16 | SULT1A3 | 33049255 | 0 |
| CEU | chr16 | SULT1A3 | 33099255 | 0 |

### 3\_Introgression\_data

|     |       |         |           |   |
|-----|-------|---------|-----------|---|
| CEU | chr16 | SULT1A3 | 33149255  | 0 |
| CEU | chr16 | SULT1A3 | 33199255  | 0 |
| CEU | chr16 | SULT1A3 | 33249255  | 0 |
| CEU | chr16 | SULT1A3 | 33299255  | 0 |
| CEU | chr16 | SULT1A3 | 33349255  | 0 |
| CEU | chr16 | SULT1A3 | 33399255  | 0 |
| CEU | chr16 | SULT1A3 | 33449255  | 0 |
| CEU | chr16 | SULT1A3 | 33499255  | 0 |
| CEU | chr16 | SULT1A3 | 33549255  | 0 |
| CEU | chr16 | SULT1A3 | 33599255  | 0 |
| CEU | chr16 | SULT1A3 | 33649255  | 0 |
| CEU | chr16 | SULT1A3 | 33699255  | 0 |
| CEU | chr16 | SULT1A3 | 33749255  | 0 |
| CEU | chr16 | SULT1A3 | 33799255  | 0 |
| CEU | chr16 | SULT1A3 | 33849255  | 0 |
| CEU | chr16 | SULT1A3 | 33899255  | 0 |
| CEU | chr16 | SULT1A3 | 33949255  | 0 |
| CEU | chr16 | SULT1A3 | 33999255  | 0 |
| CEU | chr16 | SULT1A3 | 34049255  | 0 |
| CEU | chr16 | SULT1A3 | 34099255  | 0 |
| CEU | chr16 | SULT1A3 | 34149255  | 0 |
| CEU | chr16 | SULT1A3 | 34199255  | 0 |
| CEU | chr16 | SULT1A3 | 34249255  | 0 |
| CEU | chr16 | SULT1A3 | 34299255  | 0 |
| CEU | chr16 | SULT1A3 | 34349255  | 0 |
| CEU | chr16 | SULT1A3 | 34399255  | 0 |
| CEU | chr16 | SULT1A3 | 34449255  | 0 |
| CEU | chr16 | SULT1A3 | 34499255  | 0 |
| CEU | chr16 | SULT1A3 | 34549255  | 0 |
| CEU | chr16 | SULT1A3 | 34599255  | 0 |
| CEU | chr16 | SULT1A3 | 34649255  | 0 |
| CEU | chr16 | SULT1A3 | 34699255  | 0 |
| CEU | chr16 | SULT1A3 | 34749255  | 0 |
| CEU | chr16 | SULT1A3 | 34799255  | 0 |
| CEU | chr16 | SULT1A3 | 34849255  | 0 |
| CEU | chr16 | SULT1A3 | 34899255  | 0 |
| CEU | chr16 | SULT1A3 | 34949255  | 0 |
| CEU | chr16 | SULT1A3 | 34999255  | 0 |
| CEU | chr16 | SULT1A3 | 35049255  | 0 |
| CEU | chr16 | SULT1A3 | 35099255  | 0 |
| CEU | chr16 | SULT1A3 | 35149255  | 0 |
| CEU | chr6  | TBC1D3  | 116129494 | 0 |
| CEU | chr6  | TBC1D3  | 116179494 | 0 |
| CEU | chr6  | TBC1D3  | 116229494 | 0 |
| CEU | chr6  | TBC1D3  | 116279494 | 0 |
| CEU | chr6  | TBC1D3  | 116329494 | 0 |
| CEU | chr6  | TBC1D3  | 116379494 | 0 |
| CEU | chr6  | TBC1D3  | 116429494 | 0 |
| CEU | chr6  | TBC1D3  | 116479494 | 0 |

## 3\_Introgression\_data

|     |      |        |           |     |
|-----|------|--------|-----------|-----|
| CEU | chr6 | TBC1D3 | 116529494 | 0   |
| CEU | chr6 | TBC1D3 | 116579494 | 0   |
| CEU | chr6 | TBC1D3 | 116629494 | 0   |
| CEU | chr6 | TBC1D3 | 116679494 | 0   |
| CEU | chr6 | TBC1D3 | 116729494 | 0   |
| CEU | chr6 | TBC1D3 | 116779494 | 0   |
| CEU | chr6 | TBC1D3 | 116829494 | 0   |
| CEU | chr6 | TBC1D3 | 116879494 | 0   |
| CEU | chr6 | TBC1D3 | 116929494 | 0   |
| CEU | chr6 | TBC1D3 | 116979494 | 0   |
| CEU | chr6 | TBC1D3 | 117029494 | 0   |
| CEU | chr6 | TBC1D3 | 117079494 | 0   |
| CEU | chr6 | TBC1D3 | 117129494 | 0   |
| CEU | chr6 | TBC1D3 | 117179494 | 0   |
| CEU | chr6 | TBC1D3 | 117229494 | 0   |
| CEU | chr6 | TBC1D3 | 117279494 | 14  |
| CEU | chr6 | TBC1D3 | 117329494 | 44  |
| CEU | chr6 | TBC1D3 | 117379494 | 47  |
| CEU | chr6 | TBC1D3 | 117429494 | 71  |
| CEU | chr6 | TBC1D3 | 117479494 | 139 |
| CEU | chr6 | TBC1D3 | 117529494 | 97  |
| CEU | chr6 | TBC1D3 | 117579494 | 29  |
| CEU | chr6 | TBC1D3 | 117629494 | 55  |
| CEU | chr6 | TBC1D3 | 117679494 | 66  |
| CEU | chr6 | TBC1D3 | 117729494 | 72  |
| CEU | chr6 | TBC1D3 | 117779494 | 77  |
| CEU | chr6 | TBC1D3 | 117829494 | 51  |
| CEU | chr6 | TBC1D3 | 117879494 | 36  |
| CEU | chr6 | TBC1D3 | 117929494 | 42  |
| CEU | chr6 | TBC1D3 | 117979494 | 38  |
| CEU | chr6 | TBC1D3 | 118029494 | 26  |
| CEU | chr6 | TBC1D3 | 118079494 | 20  |
| CEU | chr6 | TBC1D3 | 118129494 | 23  |
| CEU | chr6 | TBC1D3 | 118179494 | 25  |
| CEU | chr6 | TBC1D3 | 118229494 | 25  |
| CEU | chr6 | TBC1D3 | 118279494 | 37  |
| CEU | chr6 | TBC1D3 | 118329494 | 23  |
| CEU | chr6 | TBC1D3 | 118379494 | 1   |
| CEU | chr6 | TBC1D3 | 118429494 | 0   |
| CEU | chr6 | TBC1D3 | 118479494 | 0   |
| CEU | chr6 | TBC1D3 | 118529494 | 0   |
| CEU | chr6 | TBC1D3 | 118579494 | 0   |
| CEU | chr6 | TBC1D3 | 118629494 | 0   |
| CEU | chr6 | TBC1D3 | 118679494 | 0   |
| CEU | chr6 | TBC1D3 | 118729494 | 0   |
| CEU | chr6 | TBC1D3 | 118779494 | 0   |
| CEU | chr6 | TBC1D3 | 118829494 | 0   |
| CEU | chr6 | TBC1D3 | 118879494 | 0   |
| CEU | chr6 | TBC1D3 | 118929494 | 0   |



3\_Introgression\_data

|     |      |        |           |     |
|-----|------|--------|-----------|-----|
| CEU | chr6 | TBC1D3 | 118979494 | 0   |
| CEU | chr6 | TBC1D3 | 119029494 | 0   |
| CEU | chr6 | TBC1D3 | 119079494 | 0   |
| CEU | chr6 | TBC1D3 | 119129494 | 0   |
| CEU | chr6 | TBC1D3 | 119179494 | 0   |
| CEU | chr6 | TBC1D3 | 119229494 | 0   |
| CEU | chr6 | TBC1D3 | 119279494 | 0   |
| CEU | chr6 | TBC1D3 | 119329494 | 0   |
| CEU | chr6 | TBC1D3 | 119379494 | 0   |
| CEU | chr6 | TBC1D3 | 119429494 | 0   |
| CEU | chr6 | TBC1D3 | 119479494 | 0   |
| CEU | chr6 | TBC1D3 | 119529494 | 0   |
| CEU | chr6 | TBC1D3 | 119579494 | 0   |
| CEU | chr6 | TBC1D3 | 119629494 | 0   |
| CEU | chr6 | TBC1D3 | 119679494 | 0   |
| CEU | chr6 | TBC1D3 | 119729494 | 0   |
| CEU | chr6 | TBC1D3 | 119779494 | 0   |
| CEU | chr6 | TBC1D3 | 119829494 | 0   |
| CEU | chr6 | TBC1D3 | 119879494 | 23  |
| CEU | chr6 | TBC1D3 | 119929494 | 35  |
| CEU | chr6 | TBC1D3 | 119979494 | 38  |
| CEU | chr6 | TBC1D3 | 120029494 | 108 |
| CEU | chr6 | TBC1D3 | 120079494 | 115 |
| CEU | chr6 | TBC1D3 | 120129494 | 57  |
| CEU | chr6 | TBC1D3 | 120179494 | 54  |
| CEU | chr6 | TBC1D3 | 120229494 | 49  |
| CEU | chr6 | TBC1D3 | 120279494 | 36  |
| CEU | chr6 | TBC1D3 | 120329494 | 33  |
| CEU | chr6 | TBC1D3 | 120379494 | 45  |
| CEU | chr6 | TBC1D3 | 120429494 | 62  |
| CEU | chr6 | TBC1D3 | 120479494 | 51  |
| CEU | chr6 | TBC1D3 | 120529494 | 41  |
| CEU | chr6 | TBC1D3 | 120579494 | 23  |
| CEU | chr6 | TBC1D3 | 120629494 | 0   |
| CEU | chr6 | TBC1D3 | 120679494 | 0   |
| CEU | chr6 | TBC1D3 | 120729494 | 0   |
| CEU | chr6 | TBC1D3 | 120779494 | 0   |
| CEU | chr6 | TBC1D3 | 120829494 | 0   |
| CEU | chr6 | TBC1D3 | 120879494 | 0   |
| CEU | chr6 | TBC1D3 | 120929494 | 0   |
| CEU | chr6 | TBC1D3 | 120979494 | 0   |
| CEU | chr6 | TBC1D3 | 121029494 | 0   |
| CEU | chr6 | TBC1D3 | 121079494 | 0   |
| CEU | chr6 | TBC1D3 | 121129494 | 0   |
| CEU | chr6 | TBC1D3 | 121179494 | 0   |
| CEU | chr6 | TBC1D3 | 121229494 | 0   |
| CEU | chr6 | TBC1D3 | 121279494 | 0   |
| CEU | chr6 | TBC1D3 | 121329494 | 3   |
| CEU | chr6 | TBC1D3 | 121379494 | 29  |

## 3\_Introgression\_data

|     |      |        |           |    |
|-----|------|--------|-----------|----|
| CEU | chr6 | TBC1D3 | 121429494 | 40 |
| CEU | chr6 | TBC1D3 | 121479494 | 30 |
| CEU | chr6 | TBC1D3 | 121529494 | 62 |
| CEU | chr6 | TBC1D3 | 121579494 | 89 |
| CEU | chr6 | TBC1D3 | 121629494 | 62 |
| CEU | chr6 | TBC1D3 | 121679494 | 42 |
| CEU | chr6 | TBC1D3 | 121729494 | 54 |
| CEU | chr6 | TBC1D3 | 121779494 | 31 |
| CEU | chr6 | TBC1D3 | 121829494 | 0  |
| CEU | chr6 | TBC1D3 | 121879494 | 0  |
| CEU | chr6 | TBC1D3 | 121929494 | 0  |
| CEU | chr6 | TBC1D3 | 121979494 | 0  |
| CEU | chr6 | TBC1D3 | 122029494 | 0  |
| CEU | chr6 | TBC1D3 | 122079494 | 0  |
| CEU | chr6 | TBC1D3 | 122129494 | 0  |
| CEU | chr6 | TBC1D3 | 122179494 | 0  |
| CEU | chr6 | TBC1D3 | 122229494 | 0  |
| CEU | chr6 | TBC1D3 | 122279494 | 0  |
| CEU | chr6 | TBC1D3 | 122329494 | 0  |
| CEU | chr6 | TBC1D3 | 122379494 | 0  |
| CEU | chr6 | TBC1D3 | 122429494 | 0  |
| CEU | chr6 | TBC1D3 | 122479494 | 0  |
| CEU | chr6 | TBC1D3 | 122529494 | 0  |
| CEU | chr6 | TBC1D3 | 122579494 | 0  |
| CEU | chr6 | TBC1D3 | 122629494 | 0  |
| CEU | chr6 | TBC1D3 | 122679494 | 0  |
| CEU | chr6 | TBC1D3 | 122729494 | 0  |
| CEU | chr6 | TBC1D3 | 122779494 | 0  |
| CEU | chr6 | TBC1D3 | 122829494 | 0  |
| CEU | chr6 | TBC1D3 | 122879494 | 0  |
| CEU | chr6 | TBC1D3 | 122929494 | 0  |
| CEU | chr6 | TBC1D3 | 122979494 | 0  |
| CEU | chr6 | TBC1D3 | 123029494 | 0  |
| CEU | chr6 | TBC1D3 | 123079494 | 3  |
| CEU | chr6 | TBC1D3 | 123129494 | 41 |
| CEU | chr6 | TBC1D3 | 123179494 | 38 |
| CEU | chr6 | TBC1D3 | 123229494 | 0  |
| CEU | chr6 | TBC1D3 | 123279494 | 0  |
| CEU | chr6 | TBC1D3 | 123329494 | 0  |
| CEU | chr6 | TBC1D3 | 123379494 | 0  |
| CEU | chr6 | TBC1D3 | 123429494 | 0  |
| CEU | chr6 | TBC1D3 | 123479494 | 0  |
| CEU | chr6 | TBC1D3 | 123529494 | 0  |
| CEU | chr6 | TBC1D3 | 123579494 | 0  |
| CEU | chr6 | TBC1D3 | 123629494 | 0  |
| CEU | chr6 | TBC1D3 | 123679494 | 0  |
| CEU | chr6 | TBC1D3 | 123729494 | 0  |
| CEU | chr6 | TBC1D3 | 123779494 | 0  |
| CEU | chr6 | TBC1D3 | 123829494 | 0  |

## 3\_Introgression\_data

|     |      |        |           |   |
|-----|------|--------|-----------|---|
| CEU | chr6 | TBC1D3 | 123879494 | 0 |
| CEU | chr6 | TBC1D3 | 123929494 | 0 |
| CEU | chr6 | TBC1D3 | 123979494 | 0 |
| CEU | chr6 | TBC1D3 | 124029494 | 0 |
| CEU | chr6 | TBC1D3 | 124079494 | 0 |
| CEU | chr6 | TBC1D3 | 124129494 | 0 |
| CEU | chr6 | TBC1D3 | 124179494 | 0 |
| CEU | chr6 | TBC1D3 | 124229494 | 0 |
| CEU | chr6 | TBC1D3 | 124279494 | 0 |
| CEU | chr6 | TBC1D3 | 124329494 | 0 |
| CEU | chr6 | TBC1D3 | 124379494 | 0 |
| CEU | chr6 | TBC1D3 | 124429494 | 0 |
| CEU | chr6 | TBC1D3 | 124479494 | 0 |
| CEU | chr6 | TBC1D3 | 124529494 | 0 |
| CEU | chr6 | TBC1D3 | 124579494 | 0 |
| CEU | chr6 | TBC1D3 | 124629494 | 0 |
| CEU | chr6 | TBC1D3 | 124679494 | 0 |
| CEU | chr6 | TBC1D3 | 124729494 | 0 |
| CEU | chr6 | TBC1D3 | 124779494 | 0 |
| CEU | chr6 | TBC1D3 | 124829494 | 0 |
| CEU | chr6 | TBC1D3 | 124879494 | 0 |
| CEU | chr6 | TBC1D3 | 124929494 | 0 |
| CEU | chr6 | TBC1D3 | 124979494 | 0 |
| CEU | chr6 | TBC1D3 | 125029494 | 0 |
| CEU | chr6 | TBC1D3 | 125079494 | 0 |
| CEU | chr6 | TBC1D3 | 125129494 | 0 |
| CEU | chr6 | TBC1D3 | 125179494 | 0 |
| CEU | chr6 | TBC1D3 | 125229494 | 0 |
| CEU | chr6 | TBC1D3 | 125279494 | 0 |
| CEU | chr6 | TBC1D3 | 125329494 | 0 |
| CEU | chr6 | TBC1D3 | 125379494 | 0 |
| CEU | chr6 | TBC1D3 | 125429494 | 0 |
| CEU | chr6 | TBC1D3 | 125479494 | 0 |
| CEU | chr6 | TBC1D3 | 125529494 | 0 |
| CEU | chr6 | TBC1D3 | 125579494 | 0 |
| CEU | chr6 | TBC1D3 | 125629494 | 0 |
| CEU | chr6 | TBC1D3 | 125679494 | 0 |
| CEU | chr6 | TBC1D3 | 125729494 | 0 |
| CEU | chr6 | TBC1D3 | 125779494 | 0 |
| CEU | chr6 | TBC1D3 | 125829494 | 0 |
| CEU | chr6 | TBC1D3 | 125879494 | 0 |
| CEU | chr6 | TBC1D3 | 125929494 | 0 |
| CEU | chr6 | TBC1D3 | 125979494 | 0 |
| CEU | chr6 | TBC1D3 | 126029494 | 0 |
| CEU | chr6 | TBC1D3 | 126079494 | 0 |
| CEU | chr6 | TBC1D3 | 126129494 | 0 |
| CEU | chr6 | TBC1D3 | 126179494 | 0 |
| CEU | chr6 | TBC1D3 | 126229494 | 0 |
| CEU | chr6 | TBC1D3 | 126279494 | 0 |

## 3\_Introgression\_data

|     |      |        |           |   |
|-----|------|--------|-----------|---|
| CEU | chr8 | TBC1D3 | 118091961 | 0 |
| CEU | chr8 | TBC1D3 | 118141961 | 0 |
| CEU | chr8 | TBC1D3 | 118191961 | 0 |
| CEU | chr8 | TBC1D3 | 118241961 | 0 |
| CEU | chr8 | TBC1D3 | 118291961 | 0 |
| CEU | chr8 | TBC1D3 | 118341961 | 0 |
| CEU | chr8 | TBC1D3 | 118391961 | 0 |
| CEU | chr8 | TBC1D3 | 118441961 | 0 |
| CEU | chr8 | TBC1D3 | 118491961 | 0 |
| CEU | chr8 | TBC1D3 | 118541961 | 0 |
| CEU | chr8 | TBC1D3 | 118591961 | 0 |
| CEU | chr8 | TBC1D3 | 118641961 | 0 |
| CEU | chr8 | TBC1D3 | 118691961 | 0 |
| CEU | chr8 | TBC1D3 | 118741961 | 0 |
| CEU | chr8 | TBC1D3 | 118791961 | 0 |
| CEU | chr8 | TBC1D3 | 118841961 | 0 |
| CEU | chr8 | TBC1D3 | 118891961 | 0 |
| CEU | chr8 | TBC1D3 | 118941961 | 0 |
| CEU | chr8 | TBC1D3 | 118991961 | 0 |
| CEU | chr8 | TBC1D3 | 119041961 | 0 |
| CEU | chr8 | TBC1D3 | 119091961 | 0 |
| CEU | chr8 | TBC1D3 | 119141961 | 0 |
| CEU | chr8 | TBC1D3 | 119191961 | 0 |
| CEU | chr8 | TBC1D3 | 119241961 | 0 |
| CEU | chr8 | TBC1D3 | 119291961 | 0 |
| CEU | chr8 | TBC1D3 | 119341961 | 0 |
| CEU | chr8 | TBC1D3 | 119391961 | 0 |
| CEU | chr8 | TBC1D3 | 119441961 | 0 |
| CEU | chr8 | TBC1D3 | 119491961 | 0 |
| CEU | chr8 | TBC1D3 | 119541961 | 0 |
| CEU | chr8 | TBC1D3 | 119591961 | 0 |
| CEU | chr8 | TBC1D3 | 119641961 | 0 |
| CEU | chr8 | TBC1D3 | 119691961 | 0 |
| CEU | chr8 | TBC1D3 | 119741961 | 0 |
| CEU | chr8 | TBC1D3 | 119791961 | 0 |
| CEU | chr8 | TBC1D3 | 119841961 | 0 |
| CEU | chr8 | TBC1D3 | 119891961 | 0 |
| CEU | chr8 | TBC1D3 | 119941961 | 0 |
| CEU | chr8 | TBC1D3 | 119991961 | 0 |
| CEU | chr8 | TBC1D3 | 120041961 | 0 |
| CEU | chr8 | TBC1D3 | 120091961 | 0 |
| CEU | chr8 | TBC1D3 | 120141961 | 0 |
| CEU | chr8 | TBC1D3 | 120191961 | 0 |
| CEU | chr8 | TBC1D3 | 120241961 | 0 |
| CEU | chr8 | TBC1D3 | 120291961 | 0 |
| CEU | chr8 | TBC1D3 | 120341961 | 0 |
| CEU | chr8 | TBC1D3 | 120391961 | 0 |
| CEU | chr8 | TBC1D3 | 120441961 | 0 |
| CEU | chr8 | TBC1D3 | 120491961 | 0 |

## 3\_Introgression\_data

|     |      |        |           |   |
|-----|------|--------|-----------|---|
| CEU | chr8 | TBC1D3 | 120541961 | 0 |
| CEU | chr8 | TBC1D3 | 120591961 | 0 |
| CEU | chr8 | TBC1D3 | 120641961 | 0 |
| CEU | chr8 | TBC1D3 | 120691961 | 0 |
| CEU | chr8 | TBC1D3 | 120741961 | 0 |
| CEU | chr8 | TBC1D3 | 120791961 | 0 |
| CEU | chr8 | TBC1D3 | 120841961 | 0 |
| CEU | chr8 | TBC1D3 | 120891961 | 0 |
| CEU | chr8 | TBC1D3 | 120941961 | 0 |
| CEU | chr8 | TBC1D3 | 120991961 | 0 |
| CEU | chr8 | TBC1D3 | 121041961 | 0 |
| CEU | chr8 | TBC1D3 | 121091961 | 0 |
| CEU | chr8 | TBC1D3 | 121141961 | 0 |
| CEU | chr8 | TBC1D3 | 121191961 | 0 |
| CEU | chr8 | TBC1D3 | 121241961 | 0 |
| CEU | chr8 | TBC1D3 | 121291961 | 0 |
| CEU | chr8 | TBC1D3 | 121341961 | 0 |
| CEU | chr8 | TBC1D3 | 121391961 | 0 |
| CEU | chr8 | TBC1D3 | 121441961 | 0 |
| CEU | chr8 | TBC1D3 | 121491961 | 0 |
| CEU | chr8 | TBC1D3 | 121541961 | 0 |
| CEU | chr8 | TBC1D3 | 121591961 | 0 |
| CEU | chr8 | TBC1D3 | 121641961 | 0 |
| CEU | chr8 | TBC1D3 | 121691961 | 0 |
| CEU | chr8 | TBC1D3 | 121741961 | 0 |
| CEU | chr8 | TBC1D3 | 121791961 | 0 |
| CEU | chr8 | TBC1D3 | 121841961 | 0 |
| CEU | chr8 | TBC1D3 | 121891961 | 0 |
| CEU | chr8 | TBC1D3 | 121941961 | 0 |
| CEU | chr8 | TBC1D3 | 121991961 | 0 |
| CEU | chr8 | TBC1D3 | 122041961 | 0 |
| CEU | chr8 | TBC1D3 | 122091961 | 0 |
| CEU | chr8 | TBC1D3 | 122141961 | 0 |
| CEU | chr8 | TBC1D3 | 122191961 | 0 |
| CEU | chr8 | TBC1D3 | 122241961 | 0 |
| CEU | chr8 | TBC1D3 | 122291961 | 0 |
| CEU | chr8 | TBC1D3 | 122341961 | 0 |
| CEU | chr8 | TBC1D3 | 122391961 | 0 |
| CEU | chr8 | TBC1D3 | 122441961 | 0 |
| CEU | chr8 | TBC1D3 | 122491961 | 0 |
| CEU | chr8 | TBC1D3 | 122541961 | 0 |
| CEU | chr8 | TBC1D3 | 122591961 | 0 |
| CEU | chr8 | TBC1D3 | 122641961 | 0 |
| CEU | chr8 | TBC1D3 | 122691961 | 0 |
| CEU | chr8 | TBC1D3 | 122741961 | 0 |
| CEU | chr8 | TBC1D3 | 122791961 | 0 |
| CEU | chr8 | TBC1D3 | 122841961 | 0 |
| CEU | chr8 | TBC1D3 | 122891961 | 0 |
| CEU | chr8 | TBC1D3 | 122941961 | 0 |

## 3\_Introgression\_data

|     |      |        |           |    |
|-----|------|--------|-----------|----|
| CEU | chr8 | TBC1D3 | 122991961 | 0  |
| CEU | chr8 | TBC1D3 | 123041961 | 0  |
| CEU | chr8 | TBC1D3 | 123091961 | 0  |
| CEU | chr8 | TBC1D3 | 123141961 | 0  |
| CEU | chr8 | TBC1D3 | 123191961 | 0  |
| CEU | chr8 | TBC1D3 | 123241961 | 0  |
| CEU | chr8 | TBC1D3 | 123291961 | 0  |
| CEU | chr8 | TBC1D3 | 123341961 | 0  |
| CEU | chr8 | TBC1D3 | 123391961 | 0  |
| CEU | chr8 | TBC1D3 | 123441961 | 0  |
| CEU | chr8 | TBC1D3 | 123491961 | 0  |
| CEU | chr8 | TBC1D3 | 123541961 | 0  |
| CEU | chr8 | TBC1D3 | 123591961 | 0  |
| CEU | chr8 | TBC1D3 | 123641961 | 0  |
| CEU | chr8 | TBC1D3 | 123691961 | 0  |
| CEU | chr8 | TBC1D3 | 123741961 | 0  |
| CEU | chr8 | TBC1D3 | 123791961 | 0  |
| CEU | chr8 | TBC1D3 | 123841961 | 0  |
| CEU | chr8 | TBC1D3 | 123891961 | 0  |
| CEU | chr8 | TBC1D3 | 123941961 | 0  |
| CEU | chr8 | TBC1D3 | 123991961 | 0  |
| CEU | chr8 | TBC1D3 | 124041961 | 0  |
| CEU | chr8 | TBC1D3 | 124091961 | 0  |
| CEU | chr8 | TBC1D3 | 124141961 | 0  |
| CEU | chr8 | TBC1D3 | 124191961 | 0  |
| CEU | chr8 | TBC1D3 | 124241961 | 0  |
| CEU | chr8 | TBC1D3 | 124291961 | 0  |
| CEU | chr8 | TBC1D3 | 124341961 | 0  |
| CEU | chr8 | TBC1D3 | 124391961 | 0  |
| CEU | chr8 | TBC1D3 | 124441961 | 0  |
| CEU | chr8 | TBC1D3 | 124491961 | 0  |
| CEU | chr8 | TBC1D3 | 124541961 | 26 |
| CEU | chr8 | TBC1D3 | 124591961 | 62 |
| CEU | chr8 | TBC1D3 | 124641961 | 61 |
| CEU | chr8 | TBC1D3 | 124691961 | 25 |
| CEU | chr8 | TBC1D3 | 124741961 | 0  |
| CEU | chr8 | TBC1D3 | 124791961 | 0  |
| CEU | chr8 | TBC1D3 | 124841961 | 0  |
| CEU | chr8 | TBC1D3 | 124891961 | 0  |
| CEU | chr8 | TBC1D3 | 124941961 | 0  |
| CEU | chr8 | TBC1D3 | 124991961 | 0  |
| CEU | chr8 | TBC1D3 | 125041961 | 0  |
| CEU | chr8 | TBC1D3 | 125091961 | 0  |
| CEU | chr8 | TBC1D3 | 125141961 | 0  |
| CEU | chr8 | TBC1D3 | 125191961 | 0  |
| CEU | chr8 | TBC1D3 | 125241961 | 0  |
| CEU | chr8 | TBC1D3 | 125291961 | 0  |
| CEU | chr8 | TBC1D3 | 125341961 | 0  |
| CEU | chr8 | TBC1D3 | 125391961 | 0  |

## 3\_Introgression\_data

|     |      |        |           |   |
|-----|------|--------|-----------|---|
| CEU | chr8 | TBC1D3 | 125441961 | 0 |
| CEU | chr8 | TBC1D3 | 125491961 | 0 |
| CEU | chr8 | TBC1D3 | 125541961 | 0 |
| CEU | chr8 | TBC1D3 | 125591961 | 0 |
| CEU | chr8 | TBC1D3 | 125641961 | 0 |
| CEU | chr8 | TBC1D3 | 125691961 | 0 |
| CEU | chr8 | TBC1D3 | 125741961 | 0 |
| CEU | chr8 | TBC1D3 | 125791961 | 0 |
| CEU | chr8 | TBC1D3 | 125841961 | 0 |
| CEU | chr8 | TBC1D3 | 125891961 | 0 |
| CEU | chr8 | TBC1D3 | 125941961 | 0 |
| CEU | chr8 | TBC1D3 | 125991961 | 0 |
| CEU | chr8 | TBC1D3 | 126041961 | 0 |
| CEU | chr8 | TBC1D3 | 126091961 | 0 |
| CEU | chr8 | TBC1D3 | 126141961 | 0 |
| CEU | chr8 | TBC1D3 | 126191961 | 0 |
| CEU | chr8 | TBC1D3 | 126241961 | 0 |
| CEU | chr8 | TBC1D3 | 126291961 | 0 |
| CEU | chr8 | TBC1D3 | 126341961 | 0 |
| CEU | chr8 | TBC1D3 | 126391961 | 0 |
| CEU | chr8 | TBC1D3 | 126441961 | 0 |
| CEU | chr8 | TBC1D3 | 126491961 | 0 |
| CEU | chr8 | TBC1D3 | 126541961 | 0 |
| CEU | chr8 | TBC1D3 | 126591961 | 0 |
| CEU | chr8 | TBC1D3 | 126641961 | 0 |
| CEU | chr8 | TBC1D3 | 126691961 | 0 |
| CEU | chr8 | TBC1D3 | 126741961 | 0 |
| CEU | chr8 | TBC1D3 | 126791961 | 0 |
| CEU | chr8 | TBC1D3 | 126841961 | 0 |
| CEU | chr8 | TBC1D3 | 126891961 | 0 |
| CEU | chr8 | TBC1D3 | 126941961 | 0 |
| CEU | chr8 | TBC1D3 | 126991961 | 0 |
| CEU | chr8 | TBC1D3 | 127041961 | 0 |
| CEU | chr8 | TBC1D3 | 127091961 | 0 |
| CEU | chr8 | TBC1D3 | 127141961 | 0 |
| CEU | chr8 | TBC1D3 | 127191961 | 0 |
| CEU | chr8 | TBC1D3 | 127241961 | 0 |
| CEU | chr8 | TBC1D3 | 127291961 | 0 |
| CEU | chr8 | TBC1D3 | 127341961 | 0 |
| CEU | chr8 | TBC1D3 | 127391961 | 0 |
| CEU | chr8 | TBC1D3 | 127441961 | 0 |
| CEU | chr8 | TBC1D3 | 127491961 | 0 |
| CEU | chr8 | TBC1D3 | 127541961 | 0 |
| CEU | chr8 | TBC1D3 | 127591961 | 0 |
| CEU | chr8 | TBC1D3 | 127641961 | 0 |
| CEU | chr8 | TBC1D3 | 127691961 | 0 |
| CEU | chr8 | TBC1D3 | 127741961 | 0 |
| CEU | chr8 | TBC1D3 | 127791961 | 0 |
| CEU | chr8 | TBC1D3 | 127841961 | 0 |

## 3\_Introgression\_data

|     |       |        |           |   |
|-----|-------|--------|-----------|---|
| CEU | chr8  | TBC1D3 | 127891961 | 0 |
| CEU | chr8  | TBC1D3 | 127941961 | 0 |
| CEU | chr8  | TBC1D3 | 127991961 | 0 |
| CEU | chr8  | TBC1D3 | 128041961 | 0 |
| CEU | chr8  | TBC1D3 | 128091961 | 0 |
| CEU | chr12 | TBC1D3 | 59809484  | 0 |
| CEU | chr12 | TBC1D3 | 59859484  | 0 |
| CEU | chr12 | TBC1D3 | 59909484  | 0 |
| CEU | chr12 | TBC1D3 | 59959484  | 0 |
| CEU | chr12 | TBC1D3 | 60009484  | 0 |
| CEU | chr12 | TBC1D3 | 60059484  | 0 |
| CEU | chr12 | TBC1D3 | 60109484  | 0 |
| CEU | chr12 | TBC1D3 | 60159484  | 0 |
| CEU | chr12 | TBC1D3 | 60209484  | 0 |
| CEU | chr12 | TBC1D3 | 60259484  | 0 |
| CEU | chr12 | TBC1D3 | 60309484  | 0 |
| CEU | chr12 | TBC1D3 | 60359484  | 0 |
| CEU | chr12 | TBC1D3 | 60409484  | 0 |
| CEU | chr12 | TBC1D3 | 60459484  | 0 |
| CEU | chr12 | TBC1D3 | 60509484  | 0 |
| CEU | chr12 | TBC1D3 | 60559484  | 0 |
| CEU | chr12 | TBC1D3 | 60609484  | 0 |
| CEU | chr12 | TBC1D3 | 60659484  | 0 |
| CEU | chr12 | TBC1D3 | 60709484  | 0 |
| CEU | chr12 | TBC1D3 | 60759484  | 0 |
| CEU | chr12 | TBC1D3 | 60809484  | 0 |
| CEU | chr12 | TBC1D3 | 60859484  | 0 |
| CEU | chr12 | TBC1D3 | 60909484  | 0 |
| CEU | chr12 | TBC1D3 | 60959484  | 0 |
| CEU | chr12 | TBC1D3 | 61009484  | 0 |
| CEU | chr12 | TBC1D3 | 61059484  | 0 |
| CEU | chr12 | TBC1D3 | 61109484  | 0 |
| CEU | chr12 | TBC1D3 | 61159484  | 0 |
| CEU | chr12 | TBC1D3 | 61209484  | 0 |
| CEU | chr12 | TBC1D3 | 61259484  | 0 |
| CEU | chr12 | TBC1D3 | 61309484  | 0 |
| CEU | chr12 | TBC1D3 | 61359484  | 0 |
| CEU | chr12 | TBC1D3 | 61409484  | 0 |
| CEU | chr12 | TBC1D3 | 61459484  | 0 |
| CEU | chr12 | TBC1D3 | 61509484  | 0 |
| CEU | chr12 | TBC1D3 | 61559484  | 0 |
| CEU | chr12 | TBC1D3 | 61609484  | 0 |
| CEU | chr12 | TBC1D3 | 61659484  | 0 |
| CEU | chr12 | TBC1D3 | 61709484  | 0 |
| CEU | chr12 | TBC1D3 | 61759484  | 0 |
| CEU | chr12 | TBC1D3 | 61809484  | 0 |
| CEU | chr12 | TBC1D3 | 61859484  | 0 |
| CEU | chr12 | TBC1D3 | 61909484  | 0 |
| CEU | chr12 | TBC1D3 | 61959484  | 0 |



## 3\_Introgression\_data

|     |       |        |          |     |
|-----|-------|--------|----------|-----|
| CEU | chr12 | TBC1D3 | 62009484 | 0   |
| CEU | chr12 | TBC1D3 | 62059484 | 0   |
| CEU | chr12 | TBC1D3 | 62109484 | 0   |
| CEU | chr12 | TBC1D3 | 62159484 | 0   |
| CEU | chr12 | TBC1D3 | 62209484 | 0   |
| CEU | chr12 | TBC1D3 | 62259484 | 0   |
| CEU | chr12 | TBC1D3 | 62309484 | 0   |
| CEU | chr12 | TBC1D3 | 62359484 | 0   |
| CEU | chr12 | TBC1D3 | 62409484 | 0   |
| CEU | chr12 | TBC1D3 | 62459484 | 0   |
| CEU | chr12 | TBC1D3 | 62509484 | 0   |
| CEU | chr12 | TBC1D3 | 62559484 | 0   |
| CEU | chr12 | TBC1D3 | 62609484 | 0   |
| CEU | chr12 | TBC1D3 | 62659484 | 0   |
| CEU | chr12 | TBC1D3 | 62709484 | 0   |
| CEU | chr12 | TBC1D3 | 62759484 | 0   |
| CEU | chr12 | TBC1D3 | 62809484 | 0   |
| CEU | chr12 | TBC1D3 | 62859484 | 0   |
| CEU | chr12 | TBC1D3 | 62909484 | 0   |
| CEU | chr12 | TBC1D3 | 62959484 | 0   |
| CEU | chr12 | TBC1D3 | 63009484 | 14  |
| CEU | chr12 | TBC1D3 | 63059484 | 33  |
| CEU | chr12 | TBC1D3 | 63109484 | 39  |
| CEU | chr12 | TBC1D3 | 63159484 | 47  |
| CEU | chr12 | TBC1D3 | 63209484 | 46  |
| CEU | chr12 | TBC1D3 | 63259484 | 19  |
| CEU | chr12 | TBC1D3 | 63309484 | 0   |
| CEU | chr12 | TBC1D3 | 63359484 | 0   |
| CEU | chr12 | TBC1D3 | 63409484 | 0   |
| CEU | chr12 | TBC1D3 | 63459484 | 0   |
| CEU | chr12 | TBC1D3 | 63509484 | 0   |
| CEU | chr12 | TBC1D3 | 63559484 | 3   |
| CEU | chr12 | TBC1D3 | 63609484 | 31  |
| CEU | chr12 | TBC1D3 | 63659484 | 48  |
| CEU | chr12 | TBC1D3 | 63709484 | 78  |
| CEU | chr12 | TBC1D3 | 63759484 | 84  |
| CEU | chr12 | TBC1D3 | 63809484 | 40  |
| CEU | chr12 | TBC1D3 | 63859484 | 33  |
| CEU | chr12 | TBC1D3 | 63909484 | 53  |
| CEU | chr12 | TBC1D3 | 63959484 | 74  |
| CEU | chr12 | TBC1D3 | 64009484 | 84  |
| CEU | chr12 | TBC1D3 | 64059484 | 79  |
| CEU | chr12 | TBC1D3 | 64109484 | 149 |
| CEU | chr12 | TBC1D3 | 64159484 | 136 |
| CEU | chr12 | TBC1D3 | 64209484 | 40  |
| CEU | chr12 | TBC1D3 | 64259484 | 49  |
| CEU | chr12 | TBC1D3 | 64309484 | 54  |
| CEU | chr12 | TBC1D3 | 64359484 | 23  |
| CEU | chr12 | TBC1D3 | 64409484 | 0   |

## 3\_Introgression\_data

|     |       |        |          |   |
|-----|-------|--------|----------|---|
| CEU | chr12 | TBC1D3 | 64459484 | 0 |
| CEU | chr12 | TBC1D3 | 64509484 | 0 |
| CEU | chr12 | TBC1D3 | 64559484 | 0 |
| CEU | chr12 | TBC1D3 | 64609484 | 0 |
| CEU | chr12 | TBC1D3 | 64659484 | 0 |
| CEU | chr12 | TBC1D3 | 64709484 | 0 |
| CEU | chr12 | TBC1D3 | 64759484 | 0 |
| CEU | chr12 | TBC1D3 | 64809484 | 0 |
| CEU | chr12 | TBC1D3 | 64859484 | 0 |
| CEU | chr12 | TBC1D3 | 64909484 | 0 |
| CEU | chr12 | TBC1D3 | 64959484 | 0 |
| CEU | chr12 | TBC1D3 | 65009484 | 0 |
| CEU | chr12 | TBC1D3 | 65059484 | 0 |
| CEU | chr12 | TBC1D3 | 65109484 | 0 |
| CEU | chr12 | TBC1D3 | 65159484 | 0 |
| CEU | chr12 | TBC1D3 | 65209484 | 0 |
| CEU | chr12 | TBC1D3 | 65259484 | 0 |
| CEU | chr12 | TBC1D3 | 65309484 | 0 |
| CEU | chr12 | TBC1D3 | 65359484 | 0 |
| CEU | chr12 | TBC1D3 | 65409484 | 0 |
| CEU | chr12 | TBC1D3 | 65459484 | 0 |
| CEU | chr12 | TBC1D3 | 65509484 | 0 |
| CEU | chr12 | TBC1D3 | 65559484 | 0 |
| CEU | chr12 | TBC1D3 | 65609484 | 0 |
| CEU | chr12 | TBC1D3 | 65659484 | 0 |
| CEU | chr12 | TBC1D3 | 65709484 | 0 |
| CEU | chr12 | TBC1D3 | 65759484 | 0 |
| CEU | chr12 | TBC1D3 | 65809484 | 0 |
| CEU | chr12 | TBC1D3 | 65859484 | 0 |
| CEU | chr12 | TBC1D3 | 65909484 | 0 |
| CEU | chr12 | TBC1D3 | 65959484 | 0 |
| CEU | chr12 | TBC1D3 | 66009484 | 0 |
| CEU | chr12 | TBC1D3 | 66059484 | 0 |
| CEU | chr12 | TBC1D3 | 66109484 | 0 |
| CEU | chr12 | TBC1D3 | 66159484 | 0 |
| CEU | chr12 | TBC1D3 | 66209484 | 0 |
| CEU | chr12 | TBC1D3 | 66259484 | 0 |
| CEU | chr12 | TBC1D3 | 66309484 | 0 |
| CEU | chr12 | TBC1D3 | 66359484 | 0 |
| CEU | chr12 | TBC1D3 | 66409484 | 0 |
| CEU | chr12 | TBC1D3 | 66459484 | 0 |
| CEU | chr12 | TBC1D3 | 66509484 | 0 |
| CEU | chr12 | TBC1D3 | 66559484 | 0 |
| CEU | chr12 | TBC1D3 | 66609484 | 0 |
| CEU | chr12 | TBC1D3 | 66659484 | 0 |
| CEU | chr12 | TBC1D3 | 66709484 | 0 |
| CEU | chr12 | TBC1D3 | 66759484 | 0 |
| CEU | chr12 | TBC1D3 | 66809484 | 0 |
| CEU | chr12 | TBC1D3 | 66859484 | 0 |

3\_Introgression\_data

|     |       |        |          |    |
|-----|-------|--------|----------|----|
| CEU | chr12 | TBC1D3 | 66909484 | 0  |
| CEU | chr12 | TBC1D3 | 66959484 | 0  |
| CEU | chr12 | TBC1D3 | 67009484 | 0  |
| CEU | chr12 | TBC1D3 | 67059484 | 0  |
| CEU | chr12 | TBC1D3 | 67109484 | 0  |
| CEU | chr12 | TBC1D3 | 67159484 | 0  |
| CEU | chr12 | TBC1D3 | 67209484 | 0  |
| CEU | chr12 | TBC1D3 | 67259484 | 0  |
| CEU | chr12 | TBC1D3 | 67309484 | 0  |
| CEU | chr12 | TBC1D3 | 67359484 | 0  |
| CEU | chr12 | TBC1D3 | 67409484 | 0  |
| CEU | chr12 | TBC1D3 | 67459484 | 5  |
| CEU | chr12 | TBC1D3 | 67509484 | 18 |
| CEU | chr12 | TBC1D3 | 67559484 | 28 |
| CEU | chr12 | TBC1D3 | 67609484 | 34 |
| CEU | chr12 | TBC1D3 | 67659484 | 26 |
| CEU | chr12 | TBC1D3 | 67709484 | 14 |
| CEU | chr12 | TBC1D3 | 67759484 | 19 |
| CEU | chr12 | TBC1D3 | 67809484 | 45 |
| CEU | chr12 | TBC1D3 | 67859484 | 49 |
| CEU | chr12 | TBC1D3 | 67909484 | 16 |
| CEU | chr12 | TBC1D3 | 67959484 | 0  |
| CEU | chr12 | TBC1D3 | 68009484 | 0  |
| CEU | chr12 | TBC1D3 | 68059484 | 0  |
| CEU | chr12 | TBC1D3 | 68109484 | 0  |
| CEU | chr12 | TBC1D3 | 68159484 | 0  |
| CEU | chr12 | TBC1D3 | 68209484 | 0  |
| CEU | chr12 | TBC1D3 | 68259484 | 0  |
| CEU | chr12 | TBC1D3 | 68309484 | 0  |
| CEU | chr12 | TBC1D3 | 68359484 | 0  |
| CEU | chr12 | TBC1D3 | 68409484 | 0  |
| CEU | chr12 | TBC1D3 | 68459484 | 0  |
| CEU | chr12 | TBC1D3 | 68509484 | 0  |
| CEU | chr12 | TBC1D3 | 68559484 | 0  |
| CEU | chr12 | TBC1D3 | 68609484 | 0  |
| CEU | chr12 | TBC1D3 | 68659484 | 0  |
| CEU | chr12 | TBC1D3 | 68709484 | 0  |
| CEU | chr12 | TBC1D3 | 68759484 | 0  |
| CEU | chr12 | TBC1D3 | 68809484 | 13 |
| CEU | chr12 | TBC1D3 | 68859484 | 62 |
| CEU | chr12 | TBC1D3 | 68909484 | 78 |
| CEU | chr12 | TBC1D3 | 68959484 | 57 |
| CEU | chr12 | TBC1D3 | 69009484 | 40 |
| CEU | chr12 | TBC1D3 | 69059484 | 35 |
| CEU | chr12 | TBC1D3 | 69109484 | 42 |
| CEU | chr12 | TBC1D3 | 69159484 | 39 |
| CEU | chr12 | TBC1D3 | 69209484 | 28 |
| CEU | chr12 | TBC1D3 | 69259484 | 8  |
| CEU | chr12 | TBC1D3 | 69309484 | 0  |

## 3\_Introgression\_data

|     |       |        |          |    |
|-----|-------|--------|----------|----|
| CEU | chr12 | TBC1D3 | 69359484 | 0  |
| CEU | chr12 | TBC1D3 | 69409484 | 0  |
| CEU | chr12 | TBC1D3 | 69459484 | 16 |
| CEU | chr12 | TBC1D3 | 69509484 | 42 |
| CEU | chr12 | TBC1D3 | 69559484 | 48 |
| CEU | chr12 | TBC1D3 | 69609484 | 27 |
| CEU | chr12 | TBC1D3 | 69659484 | 13 |
| CEU | chr12 | TBC1D3 | 69709484 | 16 |
| CEU | chr12 | TBC1D3 | 69759484 | 20 |
| CEU | chr12 | TBC1D3 | 69809484 | 35 |
| CEU | chr17 | TBC1D3 | 31215683 | 0  |
| CEU | chr17 | TBC1D3 | 31265683 | 0  |
| CEU | chr17 | TBC1D3 | 31315683 | 0  |
| CEU | chr17 | TBC1D3 | 31365683 | 0  |
| CEU | chr17 | TBC1D3 | 31415683 | 0  |
| CEU | chr17 | TBC1D3 | 31465683 | 0  |
| CEU | chr17 | TBC1D3 | 31515683 | 0  |
| CEU | chr17 | TBC1D3 | 31565683 | 0  |
| CEU | chr17 | TBC1D3 | 31615683 | 0  |
| CEU | chr17 | TBC1D3 | 31665683 | 0  |
| CEU | chr17 | TBC1D3 | 31715683 | 0  |
| CEU | chr17 | TBC1D3 | 31765683 | 0  |
| CEU | chr17 | TBC1D3 | 31815683 | 0  |
| CEU | chr17 | TBC1D3 | 31865683 | 0  |
| CEU | chr17 | TBC1D3 | 31915683 | 0  |
| CEU | chr17 | TBC1D3 | 31965683 | 0  |
| CEU | chr17 | TBC1D3 | 32015683 | 0  |
| CEU | chr17 | TBC1D3 | 32065683 | 0  |
| CEU | chr17 | TBC1D3 | 32115683 | 0  |
| CEU | chr17 | TBC1D3 | 32165683 | 0  |
| CEU | chr17 | TBC1D3 | 32215683 | 0  |
| CEU | chr17 | TBC1D3 | 32265683 | 0  |
| CEU | chr17 | TBC1D3 | 32315683 | 0  |
| CEU | chr17 | TBC1D3 | 32365683 | 0  |
| CEU | chr17 | TBC1D3 | 32415683 | 0  |
| CEU | chr17 | TBC1D3 | 32465683 | 0  |
| CEU | chr17 | TBC1D3 | 32515683 | 0  |
| CEU | chr17 | TBC1D3 | 32565683 | 0  |
| CEU | chr17 | TBC1D3 | 32615683 | 0  |
| CEU | chr17 | TBC1D3 | 32665683 | 0  |
| CEU | chr17 | TBC1D3 | 32715683 | 0  |
| CEU | chr17 | TBC1D3 | 32765683 | 0  |
| CEU | chr17 | TBC1D3 | 32815683 | 0  |
| CEU | chr17 | TBC1D3 | 32865683 | 0  |
| CEU | chr17 | TBC1D3 | 32915683 | 0  |
| CEU | chr17 | TBC1D3 | 32965683 | 0  |
| CEU | chr17 | TBC1D3 | 33015683 | 0  |
| CEU | chr17 | TBC1D3 | 33065683 | 0  |
| CEU | chr17 | TBC1D3 | 33115683 | 0  |

### 3\_Introgression\_data

|     |       |        |          |    |
|-----|-------|--------|----------|----|
| CEU | chr17 | TBC1D3 | 33165683 | 0  |
| CEU | chr17 | TBC1D3 | 33215683 | 0  |
| CEU | chr17 | TBC1D3 | 33265683 | 0  |
| CEU | chr17 | TBC1D3 | 33315683 | 0  |
| CEU | chr17 | TBC1D3 | 33365683 | 0  |
| CEU | chr17 | TBC1D3 | 33415683 | 0  |
| CEU | chr17 | TBC1D3 | 33465683 | 0  |
| CEU | chr17 | TBC1D3 | 33515683 | 0  |
| CEU | chr17 | TBC1D3 | 33565683 | 0  |
| CEU | chr17 | TBC1D3 | 33615683 | 14 |
| CEU | chr17 | TBC1D3 | 33665683 | 31 |
| CEU | chr17 | TBC1D3 | 33715683 | 32 |
| CEU | chr17 | TBC1D3 | 33765683 | 24 |
| CEU | chr17 | TBC1D3 | 33815683 | 12 |
| CEU | chr17 | TBC1D3 | 33865683 | 19 |
| CEU | chr17 | TBC1D3 | 33915683 | 26 |
| CEU | chr17 | TBC1D3 | 33965683 | 21 |
| CEU | chr17 | TBC1D3 | 34015683 | 21 |
| CEU | chr17 | TBC1D3 | 34065683 | 63 |
| CEU | chr17 | TBC1D3 | 34115683 | 77 |
| CEU | chr17 | TBC1D3 | 34165683 | 47 |
| CEU | chr17 | TBC1D3 | 34215683 | 35 |
| CEU | chr17 | TBC1D3 | 34265683 | 30 |
| CEU | chr17 | TBC1D3 | 34315683 | 36 |
| CEU | chr17 | TBC1D3 | 34365683 | 18 |
| CEU | chr17 | TBC1D3 | 34415683 | 0  |
| CEU | chr17 | TBC1D3 | 34465683 | 0  |
| CEU | chr17 | TBC1D3 | 34515683 | 0  |
| CEU | chr17 | TBC1D3 | 34565683 | 0  |
| CEU | chr17 | TBC1D3 | 34615683 | 0  |
| CEU | chr17 | TBC1D3 | 34665683 | 0  |
| CEU | chr17 | TBC1D3 | 34715683 | 0  |
| CEU | chr17 | TBC1D3 | 34765683 | 0  |
| CEU | chr17 | TBC1D3 | 34815683 | 0  |
| CEU | chr17 | TBC1D3 | 34865683 | 0  |
| CEU | chr17 | TBC1D3 | 34915683 | 0  |
| CEU | chr17 | TBC1D3 | 34965683 | 0  |
| CEU | chr17 | TBC1D3 | 35015683 | 0  |
| CEU | chr17 | TBC1D3 | 35065683 | 0  |
| CEU | chr17 | TBC1D3 | 35115683 | 5  |
| CEU | chr17 | TBC1D3 | 35165683 | 22 |
| CEU | chr17 | TBC1D3 | 35215683 | 17 |
| CEU | chr17 | TBC1D3 | 35265683 | 0  |
| CEU | chr17 | TBC1D3 | 35315683 | 0  |
| CEU | chr17 | TBC1D3 | 35365683 | 0  |
| CEU | chr17 | TBC1D3 | 35415683 | 0  |
| CEU | chr17 | TBC1D3 | 35465683 | 0  |
| CEU | chr17 | TBC1D3 | 35515683 | 0  |
| CEU | chr17 | TBC1D3 | 35565683 | 0  |

## 3\_Introgression\_data

|     |       |        |          |   |
|-----|-------|--------|----------|---|
| CEU | chr17 | TBC1D3 | 35615683 | 0 |
| CEU | chr17 | TBC1D3 | 35665683 | 0 |
| CEU | chr17 | TBC1D3 | 35715683 | 0 |
| CEU | chr17 | TBC1D3 | 35765683 | 0 |
| CEU | chr17 | TBC1D3 | 35815683 | 0 |
| CEU | chr17 | TBC1D3 | 35865683 | 0 |
| CEU | chr17 | TBC1D3 | 35915683 | 0 |
| CEU | chr17 | TBC1D3 | 35965683 | 0 |
| CEU | chr17 | TBC1D3 | 36015683 | 0 |
| CEU | chr17 | TBC1D3 | 36065683 | 0 |
| CEU | chr17 | TBC1D3 | 36115683 | 0 |
| CEU | chr17 | TBC1D3 | 36165683 | 0 |
| CEU | chr17 | TBC1D3 | 36215683 | 0 |
| CEU | chr17 | TBC1D3 | 36265683 | 0 |
| CEU | chr17 | TBC1D3 | 36315683 | 0 |
| CEU | chr17 | TBC1D3 | 36365683 | 0 |
| CEU | chr17 | TBC1D3 | 36415683 | 0 |
| CEU | chr17 | TBC1D3 | 36465683 | 0 |
| CEU | chr17 | TBC1D3 | 36515683 | 0 |
| CEU | chr17 | TBC1D3 | 36565683 | 0 |
| CEU | chr17 | TBC1D3 | 36615683 | 0 |
| CEU | chr17 | TBC1D3 | 36665683 | 0 |
| CEU | chr17 | TBC1D3 | 36715683 | 0 |
| CEU | chr17 | TBC1D3 | 36765683 | 0 |
| CEU | chr17 | TBC1D3 | 36815683 | 0 |
| CEU | chr17 | TBC1D3 | 36865683 | 0 |
| CEU | chr17 | TBC1D3 | 36915683 | 0 |
| CEU | chr17 | TBC1D3 | 36965683 | 0 |
| CEU | chr17 | TBC1D3 | 37015683 | 0 |
| CEU | chr17 | TBC1D3 | 37065683 | 0 |
| CEU | chr17 | TBC1D3 | 37115683 | 0 |
| CEU | chr17 | TBC1D3 | 37165683 | 0 |
| CEU | chr17 | TBC1D3 | 37215683 | 0 |
| CEU | chr17 | TBC1D3 | 37265683 | 0 |
| CEU | chr17 | TBC1D3 | 37315683 | 0 |
| CEU | chr17 | TBC1D3 | 37365683 | 0 |
| CEU | chr17 | TBC1D3 | 37415683 | 0 |
| CEU | chr17 | TBC1D3 | 37465683 | 0 |
| CEU | chr17 | TBC1D3 | 37515683 | 0 |
| CEU | chr17 | TBC1D3 | 37565683 | 0 |
| CEU | chr17 | TBC1D3 | 37615683 | 0 |
| CEU | chr17 | TBC1D3 | 37665683 | 0 |
| CEU | chr17 | TBC1D3 | 37715683 | 0 |
| CEU | chr17 | TBC1D3 | 37765683 | 0 |
| CEU | chr17 | TBC1D3 | 37815683 | 0 |
| CEU | chr17 | TBC1D3 | 37865683 | 0 |
| CEU | chr17 | TBC1D3 | 37915683 | 0 |
| CEU | chr17 | TBC1D3 | 37965683 | 0 |
| CEU | chr17 | TBC1D3 | 38015683 | 0 |

## 3\_Introgression\_data

|     |       |        |          |    |
|-----|-------|--------|----------|----|
| CEU | chr17 | TBC1D3 | 38065683 | 0  |
| CEU | chr17 | TBC1D3 | 38115683 | 0  |
| CEU | chr17 | TBC1D3 | 38165683 | 0  |
| CEU | chr17 | TBC1D3 | 38215683 | 3  |
| CEU | chr17 | TBC1D3 | 38265683 | 21 |
| CEU | chr17 | TBC1D3 | 38315683 | 33 |
| CEU | chr17 | TBC1D3 | 38365683 | 32 |
| CEU | chr17 | TBC1D3 | 38415683 | 36 |
| CEU | chr17 | TBC1D3 | 38465683 | 42 |
| CEU | chr17 | TBC1D3 | 38515683 | 49 |
| CEU | chr17 | TBC1D3 | 38565683 | 43 |
| CEU | chr17 | TBC1D3 | 38615683 | 35 |
| CEU | chr17 | TBC1D3 | 38665683 | 18 |
| CEU | chr17 | TBC1D3 | 38715683 | 0  |
| CEU | chr17 | TBC1D3 | 38765683 | 0  |
| CEU | chr17 | TBC1D3 | 38815683 | 0  |
| CEU | chr17 | TBC1D3 | 38865683 | 0  |
| CEU | chr17 | TBC1D3 | 38915683 | 0  |
| CEU | chr17 | TBC1D3 | 38965683 | 0  |
| CEU | chr17 | TBC1D3 | 39015683 | 0  |
| CEU | chr17 | TBC1D3 | 39065683 | 0  |
| CEU | chr17 | TBC1D3 | 39115683 | 0  |
| CEU | chr17 | TBC1D3 | 39165683 | 0  |
| CEU | chr17 | TBC1D3 | 39215683 | 0  |
| CEU | chr17 | TBC1D3 | 39265683 | 0  |
| CEU | chr17 | TBC1D3 | 39315683 | 0  |
| CEU | chr17 | TBC1D3 | 39365683 | 0  |
| CEU | chr17 | TBC1D3 | 39415683 | 0  |
| CEU | chr17 | TBC1D3 | 39465683 | 0  |
| CEU | chr17 | TBC1D3 | 39515683 | 0  |
| CEU | chr17 | TBC1D3 | 39565683 | 0  |
| CEU | chr17 | TBC1D3 | 39615683 | 0  |
| CEU | chr17 | TBC1D3 | 39665683 | 0  |
| CEU | chr17 | TBC1D3 | 39715683 | 0  |
| CEU | chr17 | TBC1D3 | 39765683 | 0  |
| CEU | chr17 | TBC1D3 | 39815683 | 57 |
| CEU | chr17 | TBC1D3 | 39865683 | 74 |
| CEU | chr17 | TBC1D3 | 39915683 | 26 |
| CEU | chr17 | TBC1D3 | 39965683 | 9  |
| CEU | chr17 | TBC1D3 | 40015683 | 0  |
| CEU | chr17 | TBC1D3 | 40065683 | 0  |
| CEU | chr17 | TBC1D3 | 40115683 | 0  |
| CEU | chr17 | TBC1D3 | 40165683 | 0  |
| CEU | chr17 | TBC1D3 | 40215683 | 0  |
| CEU | chr17 | TBC1D3 | 40265683 | 0  |
| CEU | chr17 | TBC1D3 | 40315683 | 0  |
| CEU | chr17 | TBC1D3 | 40365683 | 0  |
| CEU | chr17 | TBC1D3 | 40415683 | 0  |
| CEU | chr17 | TBC1D3 | 40465683 | 0  |

## 3\_Introgression\_data

|     |       |         |          |   |
|-----|-------|---------|----------|---|
| CEU | chr17 | TBC1D3  | 40515683 | 0 |
| CEU | chr17 | TBC1D3  | 40565683 | 0 |
| CEU | chr17 | TBC1D3  | 40615683 | 0 |
| CEU | chr17 | TBC1D3  | 40665683 | 0 |
| CEU | chr17 | TBC1D3  | 40715683 | 0 |
| CEU | chr17 | TBC1D3  | 40765683 | 0 |
| CEU | chr17 | TBC1D3  | 40815683 | 0 |
| CEU | chr17 | TBC1D3  | 40865683 | 0 |
| CEU | chr17 | TBC1D3  | 40915683 | 0 |
| CEU | chr17 | TBC1D3  | 40965683 | 0 |
| CEU | chr17 | TBC1D3  | 41015683 | 0 |
| CEU | chr17 | TBC1D3  | 41065683 | 0 |
| CEU | chr17 | TBC1D3  | 41115683 | 0 |
| CEU | chr16 | TP53TG3 | 27301603 | 0 |
| CEU | chr16 | TP53TG3 | 27351603 | 0 |
| CEU | chr16 | TP53TG3 | 27401603 | 0 |
| CEU | chr16 | TP53TG3 | 27451603 | 0 |
| CEU | chr16 | TP53TG3 | 27501603 | 0 |
| CEU | chr16 | TP53TG3 | 27551603 | 0 |
| CEU | chr16 | TP53TG3 | 27601603 | 0 |
| CEU | chr16 | TP53TG3 | 27651603 | 0 |
| CEU | chr16 | TP53TG3 | 27701603 | 0 |
| CEU | chr16 | TP53TG3 | 27751603 | 0 |
| CEU | chr16 | TP53TG3 | 27801603 | 0 |
| CEU | chr16 | TP53TG3 | 27851603 | 0 |
| CEU | chr16 | TP53TG3 | 27901603 | 0 |
| CEU | chr16 | TP53TG3 | 27951603 | 0 |
| CEU | chr16 | TP53TG3 | 28001603 | 0 |
| CEU | chr16 | TP53TG3 | 28051603 | 0 |
| CEU | chr16 | TP53TG3 | 28101603 | 0 |
| CEU | chr16 | TP53TG3 | 28151603 | 0 |
| CEU | chr16 | TP53TG3 | 28201603 | 0 |
| CEU | chr16 | TP53TG3 | 28251603 | 0 |
| CEU | chr16 | TP53TG3 | 28301603 | 0 |
| CEU | chr16 | TP53TG3 | 28351603 | 0 |
| CEU | chr16 | TP53TG3 | 28401603 | 0 |
| CEU | chr16 | TP53TG3 | 28451603 | 0 |
| CEU | chr16 | TP53TG3 | 28501603 | 0 |
| CEU | chr16 | TP53TG3 | 28551603 | 0 |
| CEU | chr16 | TP53TG3 | 28601603 | 0 |
| CEU | chr16 | TP53TG3 | 28651603 | 0 |
| CEU | chr16 | TP53TG3 | 28701603 | 0 |
| CEU | chr16 | TP53TG3 | 28751603 | 0 |
| CEU | chr16 | TP53TG3 | 28801603 | 0 |
| CEU | chr16 | TP53TG3 | 28851603 | 0 |
| CEU | chr16 | TP53TG3 | 28901603 | 0 |
| CEU | chr16 | TP53TG3 | 28951603 | 0 |
| CEU | chr16 | TP53TG3 | 29001603 | 0 |
| CEU | chr16 | TP53TG3 | 29051603 | 0 |



## 3\_Introgression\_data

|     |       |         |          |   |
|-----|-------|---------|----------|---|
| CEU | chr16 | TP53TG3 | 29101603 | 0 |
| CEU | chr16 | TP53TG3 | 29151603 | 0 |
| CEU | chr16 | TP53TG3 | 29201603 | 0 |
| CEU | chr16 | TP53TG3 | 29251603 | 0 |
| CEU | chr16 | TP53TG3 | 29301603 | 0 |
| CEU | chr16 | TP53TG3 | 29351603 | 0 |
| CEU | chr16 | TP53TG3 | 29401603 | 0 |
| CEU | chr16 | TP53TG3 | 29451603 | 0 |
| CEU | chr16 | TP53TG3 | 29501603 | 0 |
| CEU | chr16 | TP53TG3 | 29551603 | 0 |
| CEU | chr16 | TP53TG3 | 29601603 | 0 |
| CEU | chr16 | TP53TG3 | 29651603 | 0 |
| CEU | chr16 | TP53TG3 | 29701603 | 0 |
| CEU | chr16 | TP53TG3 | 29751603 | 0 |
| CEU | chr16 | TP53TG3 | 29801603 | 0 |
| CEU | chr16 | TP53TG3 | 29851603 | 0 |
| CEU | chr16 | TP53TG3 | 29901603 | 0 |
| CEU | chr16 | TP53TG3 | 29951603 | 0 |
| CEU | chr16 | TP53TG3 | 30001603 | 0 |
| CEU | chr16 | TP53TG3 | 30051603 | 0 |
| CEU | chr16 | TP53TG3 | 30101603 | 0 |
| CEU | chr16 | TP53TG3 | 30151603 | 0 |
| CEU | chr16 | TP53TG3 | 30201603 | 0 |
| CEU | chr16 | TP53TG3 | 30251603 | 0 |
| CEU | chr16 | TP53TG3 | 30301603 | 0 |
| CEU | chr16 | TP53TG3 | 30351603 | 0 |
| CEU | chr16 | TP53TG3 | 30401603 | 0 |
| CEU | chr16 | TP53TG3 | 30451603 | 0 |
| CEU | chr16 | TP53TG3 | 30501603 | 0 |
| CEU | chr16 | TP53TG3 | 30551603 | 0 |
| CEU | chr16 | TP53TG3 | 30601603 | 0 |
| CEU | chr16 | TP53TG3 | 30651603 | 0 |
| CEU | chr16 | TP53TG3 | 30701603 | 0 |
| CEU | chr16 | TP53TG3 | 30751603 | 0 |
| CEU | chr16 | TP53TG3 | 30801603 | 0 |
| CEU | chr16 | TP53TG3 | 30851603 | 0 |
| CEU | chr16 | TP53TG3 | 30901603 | 0 |
| CEU | chr16 | TP53TG3 | 30951603 | 0 |
| CEU | chr16 | TP53TG3 | 31001603 | 0 |
| CEU | chr16 | TP53TG3 | 31051603 | 0 |
| CEU | chr16 | TP53TG3 | 31101603 | 0 |
| CEU | chr16 | TP53TG3 | 31151603 | 0 |
| CEU | chr16 | TP53TG3 | 31201603 | 0 |
| CEU | chr16 | TP53TG3 | 31251603 | 0 |
| CEU | chr16 | TP53TG3 | 31301603 | 0 |
| CEU | chr16 | TP53TG3 | 31351603 | 0 |
| CEU | chr16 | TP53TG3 | 31401603 | 0 |
| CEU | chr16 | TP53TG3 | 31451603 | 0 |
| CEU | chr16 | TP53TG3 | 31501603 | 0 |

### 3\_Introgression\_data

|     |       |         |          |   |
|-----|-------|---------|----------|---|
| CEU | chr16 | TP53TG3 | 31551603 | 0 |
| CEU | chr16 | TP53TG3 | 31601603 | 0 |
| CEU | chr16 | TP53TG3 | 31651603 | 0 |
| CEU | chr16 | TP53TG3 | 31701603 | 0 |
| CEU | chr16 | TP53TG3 | 31751603 | 0 |
| CEU | chr16 | TP53TG3 | 31801603 | 0 |
| CEU | chr16 | TP53TG3 | 31851603 | 0 |
| CEU | chr16 | TP53TG3 | 31901603 | 0 |
| CEU | chr16 | TP53TG3 | 31951603 | 0 |
| CEU | chr16 | TP53TG3 | 32001603 | 0 |
| CEU | chr16 | TP53TG3 | 32051603 | 0 |
| CEU | chr16 | TP53TG3 | 32101603 | 0 |
| CEU | chr16 | TP53TG3 | 32151603 | 0 |
| CEU | chr16 | TP53TG3 | 32201603 | 0 |
| CEU | chr16 | TP53TG3 | 32251603 | 0 |
| CEU | chr16 | TP53TG3 | 32301603 | 0 |
| CEU | chr16 | TP53TG3 | 32351603 | 0 |
| CEU | chr16 | TP53TG3 | 32401603 | 0 |
| CEU | chr16 | TP53TG3 | 32451603 | 0 |
| CEU | chr16 | TP53TG3 | 32501603 | 0 |
| CEU | chr16 | TP53TG3 | 32551603 | 0 |
| CEU | chr16 | TP53TG3 | 32601603 | 0 |
| CEU | chr16 | TP53TG3 | 32651603 | 0 |
| CEU | chr16 | TP53TG3 | 32701603 | 0 |
| CEU | chr16 | TP53TG3 | 32751603 | 0 |
| CEU | chr16 | TP53TG3 | 32801603 | 0 |
| CEU | chr16 | TP53TG3 | 32851603 | 0 |
| CEU | chr16 | TP53TG3 | 32901603 | 0 |
| CEU | chr16 | TP53TG3 | 32951603 | 0 |
| CEU | chr16 | TP53TG3 | 33001603 | 0 |
| CEU | chr16 | TP53TG3 | 33051603 | 0 |
| CEU | chr16 | TP53TG3 | 33101603 | 0 |
| CEU | chr16 | TP53TG3 | 33151603 | 0 |
| CEU | chr16 | TP53TG3 | 33201603 | 0 |
| CEU | chr16 | TP53TG3 | 33251603 | 0 |
| CEU | chr16 | TP53TG3 | 33301603 | 0 |
| CEU | chr16 | TP53TG3 | 33351603 | 0 |
| CEU | chr16 | TP53TG3 | 33401603 | 0 |
| CEU | chr16 | TP53TG3 | 33451603 | 0 |
| CEU | chr16 | TP53TG3 | 33501603 | 0 |
| CEU | chr16 | TP53TG3 | 33551603 | 0 |
| CEU | chr16 | TP53TG3 | 33601603 | 0 |
| CEU | chr16 | TP53TG3 | 33651603 | 0 |
| CEU | chr16 | TP53TG3 | 33701603 | 0 |
| CEU | chr16 | TP53TG3 | 33751603 | 0 |
| CEU | chr16 | TP53TG3 | 33801603 | 0 |
| CEU | chr16 | TP53TG3 | 33851603 | 0 |
| CEU | chr16 | TP53TG3 | 33901603 | 0 |
| CEU | chr16 | TP53TG3 | 33951603 | 0 |

### 3\_Introgression\_data

|     |       |         |          |   |
|-----|-------|---------|----------|---|
| CEU | chr16 | TP53TG3 | 34001603 | 0 |
| CEU | chr16 | TP53TG3 | 34051603 | 0 |
| CEU | chr16 | TP53TG3 | 34101603 | 0 |
| CEU | chr16 | TP53TG3 | 34151603 | 0 |
| CEU | chr16 | TP53TG3 | 34201603 | 0 |
| CEU | chr16 | TP53TG3 | 34251603 | 0 |
| CEU | chr16 | TP53TG3 | 34301603 | 0 |
| CEU | chr16 | TP53TG3 | 34351603 | 0 |
| CEU | chr16 | TP53TG3 | 34401603 | 0 |
| CEU | chr16 | TP53TG3 | 34451603 | 0 |
| CEU | chr16 | TP53TG3 | 34501603 | 0 |
| CEU | chr16 | TP53TG3 | 34551603 | 0 |
| CEU | chr16 | TP53TG3 | 34601603 | 0 |
| CEU | chr16 | TP53TG3 | 34651603 | 0 |
| CEU | chr16 | TP53TG3 | 34701603 | 0 |
| CEU | chr16 | TP53TG3 | 34751603 | 0 |
| CEU | chr16 | TP53TG3 | 34801603 | 0 |
| CEU | chr16 | TP53TG3 | 34851603 | 0 |
| CEU | chr16 | TP53TG3 | 34901603 | 0 |
| CEU | chr16 | TP53TG3 | 34951603 | 0 |
| CEU | chr16 | TP53TG3 | 35001603 | 0 |
| CEU | chr16 | TP53TG3 | 35051603 | 0 |
| CEU | chr16 | TP53TG3 | 35101603 | 0 |
| CEU | chr16 | TP53TG3 | 35151603 | 0 |
| CEU | chr16 | TP53TG3 | 35201603 | 0 |
| CEU | chr16 | TP53TG3 | 35251603 | 0 |
| CEU | chr16 | TP53TG3 | 35301603 | 0 |
| CEU | chr16 | TP53TG3 | 35351603 | 0 |
| CEU | chr16 | TP53TG3 | 35401603 | 0 |
| CEU | chr16 | TP53TG3 | 35451603 | 0 |
| CEU | chr16 | TP53TG3 | 35501603 | 0 |
| CEU | chr16 | TP53TG3 | 35551603 | 0 |
| CEU | chr16 | TP53TG3 | 35601603 | 0 |
| CEU | chr16 | TP53TG3 | 35651603 | 0 |
| CEU | chr16 | TP53TG3 | 35701603 | 0 |
| CEU | chr16 | TP53TG3 | 35751603 | 0 |
| CEU | chr16 | TP53TG3 | 35801603 | 0 |
| CEU | chr16 | TP53TG3 | 35851603 | 0 |
| CEU | chr16 | TP53TG3 | 35901603 | 0 |
| CEU | chr16 | TP53TG3 | 35951603 | 0 |
| CEU | chr16 | TP53TG3 | 36001603 | 0 |
| CEU | chr16 | TP53TG3 | 36051603 | 0 |
| CEU | chr16 | TP53TG3 | 36101603 | 0 |
| CEU | chr16 | TP53TG3 | 36151603 | 0 |
| CEU | chr16 | TP53TG3 | 36201603 | 0 |
| CEU | chr16 | TP53TG3 | 36251603 | 0 |
| CEU | chr16 | TP53TG3 | 36301603 | 0 |
| CEU | chr16 | TP53TG3 | 36351603 | 0 |
| CEU | chr16 | TP53TG3 | 36401603 | 0 |

### 3\_Introgression\_data

|     |       |          |          |    |
|-----|-------|----------|----------|----|
| CEU | chr16 | TP53TG3  | 36451603 | 0  |
| CEU | chr16 | TP53TG3  | 36501603 | 0  |
| CEU | chr16 | TP53TG3  | 36551603 | 0  |
| CEU | chr16 | TP53TG3  | 36601603 | 0  |
| CEU | chr16 | TP53TG3  | 36651603 | 0  |
| CEU | chr16 | TP53TG3  | 36701603 | 0  |
| CEU | chr16 | TP53TG3  | 36751603 | 0  |
| CEU | chr16 | TP53TG3  | 36801603 | 0  |
| CEU | chr16 | TP53TG3  | 36851603 | 0  |
| CEU | chr16 | TP53TG3  | 36901603 | 0  |
| CEU | chr16 | TP53TG3  | 36951603 | 0  |
| CEU | chr16 | TP53TG3  | 37001603 | 0  |
| CEU | chr16 | TP53TG3  | 37051603 | 0  |
| CEU | chr16 | TP53TG3  | 37101603 | 0  |
| CEU | chr16 | TP53TG3  | 37151603 | 0  |
| CEU | chr16 | TP53TG3  | 37201603 | 0  |
| CEU | chr11 | TRIM49L1 | 84974064 | 33 |
| CEU | chr11 | TRIM49L1 | 85024064 | 33 |
| CEU | chr11 | TRIM49L1 | 85074064 | 31 |
| CEU | chr11 | TRIM49L1 | 85124064 | 32 |
| CEU | chr11 | TRIM49L1 | 85174064 | 31 |
| CEU | chr11 | TRIM49L1 | 85224064 | 39 |
| CEU | chr11 | TRIM49L1 | 85274064 | 39 |
| CEU | chr11 | TRIM49L1 | 85324064 | 29 |
| CEU | chr11 | TRIM49L1 | 85374064 | 23 |
| CEU | chr11 | TRIM49L1 | 85424064 | 33 |
| CEU | chr11 | TRIM49L1 | 85474064 | 41 |
| CEU | chr11 | TRIM49L1 | 85524064 | 28 |
| CEU | chr11 | TRIM49L1 | 85574064 | 12 |
| CEU | chr11 | TRIM49L1 | 85624064 | 4  |
| CEU | chr11 | TRIM49L1 | 85674064 | 0  |
| CEU | chr11 | TRIM49L1 | 85724064 | 0  |
| CEU | chr11 | TRIM49L1 | 85774064 | 0  |
| CEU | chr11 | TRIM49L1 | 85824064 | 0  |
| CEU | chr11 | TRIM49L1 | 85874064 | 0  |
| CEU | chr11 | TRIM49L1 | 85924064 | 0  |
| CEU | chr11 | TRIM49L1 | 85974064 | 0  |
| CEU | chr11 | TRIM49L1 | 86024064 | 0  |
| CEU | chr11 | TRIM49L1 | 86074064 | 0  |
| CEU | chr11 | TRIM49L1 | 86124064 | 0  |
| CEU | chr11 | TRIM49L1 | 86174064 | 0  |
| CEU | chr11 | TRIM49L1 | 86224064 | 0  |
| CEU | chr11 | TRIM49L1 | 86274064 | 10 |
| CEU | chr11 | TRIM49L1 | 86324064 | 26 |
| CEU | chr11 | TRIM49L1 | 86374064 | 52 |
| CEU | chr11 | TRIM49L1 | 86424064 | 63 |
| CEU | chr11 | TRIM49L1 | 86474064 | 59 |
| CEU | chr11 | TRIM49L1 | 86524064 | 49 |
| CEU | chr11 | TRIM49L1 | 86574064 | 31 |

## 3\_Introgression\_data

|     |       |          |          |    |
|-----|-------|----------|----------|----|
| CEU | chr11 | TRIM49L1 | 86624064 | 14 |
| CEU | chr11 | TRIM49L1 | 86674064 | 0  |
| CEU | chr11 | TRIM49L1 | 86724064 | 0  |
| CEU | chr11 | TRIM49L1 | 86774064 | 0  |
| CEU | chr11 | TRIM49L1 | 86824064 | 0  |
| CEU | chr11 | TRIM49L1 | 86874064 | 0  |
| CEU | chr11 | TRIM49L1 | 86924064 | 0  |
| CEU | chr11 | TRIM49L1 | 86974064 | 0  |
| CEU | chr11 | TRIM49L1 | 87024064 | 0  |
| CEU | chr11 | TRIM49L1 | 87074064 | 0  |
| CEU | chr11 | TRIM49L1 | 87124064 | 0  |
| CEU | chr11 | TRIM49L1 | 87174064 | 0  |
| CEU | chr11 | TRIM49L1 | 87224064 | 0  |
| CEU | chr11 | TRIM49L1 | 87274064 | 0  |
| CEU | chr11 | TRIM49L1 | 87324064 | 0  |
| CEU | chr11 | TRIM49L1 | 87374064 | 0  |
| CEU | chr11 | TRIM49L1 | 87424064 | 4  |
| CEU | chr11 | TRIM49L1 | 87474064 | 25 |
| CEU | chr11 | TRIM49L1 | 87524064 | 42 |
| CEU | chr11 | TRIM49L1 | 87574064 | 47 |
| CEU | chr11 | TRIM49L1 | 87624064 | 26 |
| CEU | chr11 | TRIM49L1 | 87674064 | 0  |
| CEU | chr11 | TRIM49L1 | 87724064 | 0  |
| CEU | chr11 | TRIM49L1 | 87774064 | 0  |
| CEU | chr11 | TRIM49L1 | 87824064 | 0  |
| CEU | chr11 | TRIM49L1 | 87874064 | 0  |
| CEU | chr11 | TRIM49L1 | 87924064 | 0  |
| CEU | chr11 | TRIM49L1 | 87974064 | 0  |
| CEU | chr11 | TRIM49L1 | 88024064 | 0  |
| CEU | chr11 | TRIM49L1 | 88074064 | 0  |
| CEU | chr11 | TRIM49L1 | 88124064 | 0  |
| CEU | chr11 | TRIM49L1 | 88174064 | 0  |
| CEU | chr11 | TRIM49L1 | 88224064 | 0  |
| CEU | chr11 | TRIM49L1 | 88274064 | 16 |
| CEU | chr11 | TRIM49L1 | 88324064 | 54 |
| CEU | chr11 | TRIM49L1 | 88374064 | 50 |
| CEU | chr11 | TRIM49L1 | 88424064 | 35 |
| CEU | chr11 | TRIM49L1 | 88474064 | 43 |
| CEU | chr11 | TRIM49L1 | 88524064 | 41 |
| CEU | chr11 | TRIM49L1 | 88574064 | 72 |
| CEU | chr11 | TRIM49L1 | 88624064 | 75 |
| CEU | chr11 | TRIM49L1 | 88674064 | 38 |
| CEU | chr11 | TRIM49L1 | 88724064 | 42 |
| CEU | chr11 | TRIM49L1 | 88774064 | 44 |
| CEU | chr11 | TRIM49L1 | 88824064 | 31 |
| CEU | chr11 | TRIM49L1 | 88874064 | 33 |
| CEU | chr11 | TRIM49L1 | 88924064 | 18 |
| CEU | chr11 | TRIM49L1 | 88974064 | 0  |
| CEU | chr11 | TRIM49L1 | 89024064 | 0  |

## 3\_Introgression\_data

|     |       |          |          |    |
|-----|-------|----------|----------|----|
| CEU | chr11 | TRIM49L1 | 89074064 | 0  |
| CEU | chr11 | TRIM49L1 | 89124064 | 0  |
| CEU | chr11 | TRIM49L1 | 89174064 | 5  |
| CEU | chr11 | TRIM49L1 | 89224064 | 27 |
| CEU | chr11 | TRIM49L1 | 89274064 | 46 |
| CEU | chr11 | TRIM49L1 | 89324064 | 54 |
| CEU | chr11 | TRIM49L1 | 89374064 | 68 |
| CEU | chr11 | TRIM49L1 | 89424064 | 57 |
| CEU | chr11 | TRIM49L1 | 89474064 | 31 |
| CEU | chr11 | TRIM49L1 | 89524064 | 14 |
| CEU | chr11 | TRIM49L1 | 89574064 | 2  |
| CEU | chr11 | TRIM49L1 | 89624064 | 0  |
| CEU | chr11 | TRIM49L1 | 89674064 | 0  |
| CEU | chr11 | TRIM49L1 | 89724064 | 0  |
| CEU | chr11 | TRIM49L1 | 89774064 | 0  |
| CEU | chr11 | TRIM49L1 | 89824064 | 0  |
| CEU | chr11 | TRIM49L1 | 89874064 | 0  |
| CEU | chr11 | TRIM49L1 | 89924064 | 0  |
| CEU | chr11 | TRIM49L1 | 89974064 | 0  |
| CEU | chr11 | TRIM49L1 | 90024064 | 0  |
| CEU | chr11 | TRIM49L1 | 90074064 | 0  |
| CEU | chr11 | TRIM49L1 | 90124064 | 0  |
| CEU | chr11 | TRIM49L1 | 90174064 | 0  |
| CEU | chr11 | TRIM49L1 | 90224064 | 0  |
| CEU | chr11 | TRIM49L1 | 90274064 | 0  |
| CEU | chr11 | TRIM49L1 | 90324064 | 0  |
| CEU | chr11 | TRIM49L1 | 90374064 | 0  |
| CEU | chr11 | TRIM49L1 | 90424064 | 0  |
| CEU | chr11 | TRIM49L1 | 90474064 | 0  |
| CEU | chr11 | TRIM49L1 | 90524064 | 0  |
| CEU | chr11 | TRIM49L1 | 90574064 | 0  |
| CEU | chr11 | TRIM49L1 | 90624064 | 0  |
| CEU | chr11 | TRIM49L1 | 90674064 | 0  |
| CEU | chr11 | TRIM49L1 | 90724064 | 0  |
| CEU | chr11 | TRIM49L1 | 90774064 | 0  |
| CEU | chr11 | TRIM49L1 | 90824064 | 0  |
| CEU | chr11 | TRIM49L1 | 90874064 | 0  |
| CEU | chr11 | TRIM49L1 | 90924064 | 0  |
| CEU | chr11 | TRIM49L1 | 90974064 | 0  |
| CEU | chr11 | TRIM49L1 | 91024064 | 0  |
| CEU | chr11 | TRIM49L1 | 91074064 | 0  |
| CEU | chr11 | TRIM49L1 | 91124064 | 0  |
| CEU | chr11 | TRIM49L1 | 91174064 | 0  |
| CEU | chr11 | TRIM49L1 | 91224064 | 0  |
| CEU | chr11 | TRIM49L1 | 91274064 | 0  |
| CEU | chr11 | TRIM49L1 | 91324064 | 0  |
| CEU | chr11 | TRIM49L1 | 91374064 | 0  |
| CEU | chr11 | TRIM49L1 | 91424064 | 0  |
| CEU | chr11 | TRIM49L1 | 91474064 | 0  |

## 3\_Introgression\_data

|     |       |          |          |   |
|-----|-------|----------|----------|---|
| CEU | chr11 | TRIM49L1 | 91524064 | 0 |
| CEU | chr11 | TRIM49L1 | 91574064 | 0 |
| CEU | chr11 | TRIM49L1 | 91624064 | 0 |
| CEU | chr11 | TRIM49L1 | 91674064 | 0 |
| CEU | chr11 | TRIM49L1 | 91724064 | 0 |
| CEU | chr11 | TRIM49L1 | 91774064 | 0 |
| CEU | chr11 | TRIM49L1 | 91824064 | 0 |
| CEU | chr11 | TRIM49L1 | 91874064 | 0 |
| CEU | chr11 | TRIM49L1 | 91924064 | 0 |
| CEU | chr11 | TRIM49L1 | 91974064 | 0 |
| CEU | chr11 | TRIM49L1 | 92024064 | 0 |
| CEU | chr11 | TRIM49L1 | 92074064 | 0 |
| CEU | chr11 | TRIM49L1 | 92124064 | 0 |
| CEU | chr11 | TRIM49L1 | 92174064 | 0 |
| CEU | chr11 | TRIM49L1 | 92224064 | 0 |
| CEU | chr11 | TRIM49L1 | 92274064 | 0 |
| CEU | chr11 | TRIM49L1 | 92324064 | 0 |
| CEU | chr11 | TRIM49L1 | 92374064 | 0 |
| CEU | chr11 | TRIM49L1 | 92424064 | 0 |
| CEU | chr11 | TRIM49L1 | 92474064 | 0 |
| CEU | chr11 | TRIM49L1 | 92524064 | 0 |
| CEU | chr11 | TRIM49L1 | 92574064 | 0 |
| CEU | chr11 | TRIM49L1 | 92624064 | 0 |
| CEU | chr11 | TRIM49L1 | 92674064 | 0 |
| CEU | chr11 | TRIM49L1 | 92724064 | 0 |
| CEU | chr11 | TRIM49L1 | 92774064 | 0 |
| CEU | chr11 | TRIM49L1 | 92824064 | 0 |
| CEU | chr11 | TRIM49L1 | 92874064 | 0 |
| CEU | chr11 | TRIM49L1 | 92924064 | 0 |
| CEU | chr11 | TRIM49L1 | 92974064 | 0 |
| CEU | chr11 | TRIM49L1 | 93024064 | 0 |
| CEU | chr11 | TRIM49L1 | 93074064 | 0 |
| CEU | chr11 | TRIM49L1 | 93124064 | 0 |
| CEU | chr11 | TRIM49L1 | 93174064 | 0 |
| CEU | chr11 | TRIM49L1 | 93224064 | 0 |
| CEU | chr11 | TRIM49L1 | 93274064 | 0 |
| CEU | chr11 | TRIM49L1 | 93324064 | 0 |
| CEU | chr11 | TRIM49L1 | 93374064 | 0 |
| CEU | chr11 | TRIM49L1 | 93424064 | 0 |
| CEU | chr11 | TRIM49L1 | 93474064 | 0 |
| CEU | chr11 | TRIM49L1 | 93524064 | 0 |
| CEU | chr11 | TRIM49L1 | 93574064 | 0 |
| CEU | chr11 | TRIM49L1 | 93624064 | 0 |
| CEU | chr11 | TRIM49L1 | 93674064 | 0 |
| CEU | chr11 | TRIM49L1 | 93724064 | 0 |
| CEU | chr11 | TRIM49L1 | 93774064 | 0 |
| CEU | chr11 | TRIM49L1 | 93824064 | 0 |
| CEU | chr11 | TRIM49L1 | 93874064 | 0 |
| CEU | chr11 | TRIM49L1 | 93924064 | 0 |

## 3\_Introgression\_data

|     |       |          |           |   |
|-----|-------|----------|-----------|---|
| CEU | chr11 | TRIM49L1 | 93974064  | 0 |
| CEU | chr11 | TRIM49L1 | 94024064  | 0 |
| CEU | chr11 | TRIM49L1 | 94074064  | 0 |
| CEU | chr11 | TRIM49L1 | 94124064  | 0 |
| CEU | chr11 | TRIM49L1 | 94174064  | 0 |
| CEU | chr11 | TRIM49L1 | 94224064  | 0 |
| CEU | chr11 | TRIM49L1 | 94274064  | 0 |
| CEU | chr11 | TRIM49L1 | 94324064  | 0 |
| CEU | chr11 | TRIM49L1 | 94374064  | 0 |
| CEU | chr11 | TRIM49L1 | 94424064  | 0 |
| CEU | chr11 | TRIM49L1 | 94474064  | 0 |
| CEU | chr11 | TRIM49L1 | 94524064  | 0 |
| CEU | chr11 | TRIM49L1 | 94574064  | 0 |
| CEU | chr11 | TRIM49L1 | 94624064  | 0 |
| CEU | chr11 | TRIM49L1 | 94674064  | 0 |
| CEU | chr11 | TRIM49L1 | 94724064  | 0 |
| CEU | chr11 | TRIM49L1 | 94774064  | 0 |
| CEU | chr11 | TRIM49L1 | 94824064  | 0 |
| CEU | chr11 | TRIM49L1 | 94874064  | 0 |
| CHB | chr1  | AMY1A    | 98705519  | 0 |
| CHB | chr1  | AMY1A    | 98755519  | 0 |
| CHB | chr1  | AMY1A    | 98805519  | 0 |
| CHB | chr1  | AMY1A    | 98855519  | 0 |
| CHB | chr1  | AMY1A    | 98905519  | 0 |
| CHB | chr1  | AMY1A    | 98955519  | 0 |
| CHB | chr1  | AMY1A    | 99005519  | 0 |
| CHB | chr1  | AMY1A    | 99055519  | 0 |
| CHB | chr1  | AMY1A    | 99105519  | 0 |
| CHB | chr1  | AMY1A    | 99155519  | 0 |
| CHB | chr1  | AMY1A    | 99205519  | 0 |
| CHB | chr1  | AMY1A    | 99255519  | 0 |
| CHB | chr1  | AMY1A    | 99305519  | 0 |
| CHB | chr1  | AMY1A    | 99355519  | 0 |
| CHB | chr1  | AMY1A    | 99405519  | 0 |
| CHB | chr1  | AMY1A    | 99455519  | 0 |
| CHB | chr1  | AMY1A    | 99505519  | 0 |
| CHB | chr1  | AMY1A    | 99555519  | 0 |
| CHB | chr1  | AMY1A    | 99605519  | 0 |
| CHB | chr1  | AMY1A    | 99655519  | 0 |
| CHB | chr1  | AMY1A    | 99705519  | 0 |
| CHB | chr1  | AMY1A    | 99755519  | 0 |
| CHB | chr1  | AMY1A    | 99805519  | 0 |
| CHB | chr1  | AMY1A    | 99855519  | 0 |
| CHB | chr1  | AMY1A    | 99905519  | 0 |
| CHB | chr1  | AMY1A    | 99955519  | 0 |
| CHB | chr1  | AMY1A    | 100005519 | 0 |
| CHB | chr1  | AMY1A    | 100055519 | 0 |
| CHB | chr1  | AMY1A    | 100105519 | 0 |
| CHB | chr1  | AMY1A    | 100155519 | 0 |



## 3\_Introgression\_data

|     |      |       |           |   |
|-----|------|-------|-----------|---|
| CHB | chr1 | AMY1A | 100205519 | 0 |
| CHB | chr1 | AMY1A | 100255519 | 0 |
| CHB | chr1 | AMY1A | 100305519 | 0 |
| CHB | chr1 | AMY1A | 100355519 | 0 |
| CHB | chr1 | AMY1A | 100405519 | 0 |
| CHB | chr1 | AMY1A | 100455519 | 0 |
| CHB | chr1 | AMY1A | 100505519 | 0 |
| CHB | chr1 | AMY1A | 100555519 | 0 |
| CHB | chr1 | AMY1A | 100605519 | 0 |
| CHB | chr1 | AMY1A | 100655519 | 0 |
| CHB | chr1 | AMY1A | 100705519 | 0 |
| CHB | chr1 | AMY1A | 100755519 | 0 |
| CHB | chr1 | AMY1A | 100805519 | 0 |
| CHB | chr1 | AMY1A | 100855519 | 0 |
| CHB | chr1 | AMY1A | 100905519 | 0 |
| CHB | chr1 | AMY1A | 100955519 | 0 |
| CHB | chr1 | AMY1A | 101005519 | 0 |
| CHB | chr1 | AMY1A | 101055519 | 0 |
| CHB | chr1 | AMY1A | 101105519 | 0 |
| CHB | chr1 | AMY1A | 101155519 | 0 |
| CHB | chr1 | AMY1A | 101205519 | 0 |
| CHB | chr1 | AMY1A | 101255519 | 0 |
| CHB | chr1 | AMY1A | 101305519 | 0 |
| CHB | chr1 | AMY1A | 101355519 | 0 |
| CHB | chr1 | AMY1A | 101405519 | 0 |
| CHB | chr1 | AMY1A | 101455519 | 0 |
| CHB | chr1 | AMY1A | 101505519 | 0 |
| CHB | chr1 | AMY1A | 101555519 | 0 |
| CHB | chr1 | AMY1A | 101605519 | 0 |
| CHB | chr1 | AMY1A | 101655519 | 0 |
| CHB | chr1 | AMY1A | 101705519 | 0 |
| CHB | chr1 | AMY1A | 101755519 | 0 |
| CHB | chr1 | AMY1A | 101805519 | 0 |
| CHB | chr1 | AMY1A | 101855519 | 0 |
| CHB | chr1 | AMY1A | 101905519 | 0 |
| CHB | chr1 | AMY1A | 101955519 | 0 |
| CHB | chr1 | AMY1A | 102005519 | 0 |
| CHB | chr1 | AMY1A | 102055519 | 0 |
| CHB | chr1 | AMY1A | 102105519 | 0 |
| CHB | chr1 | AMY1A | 102155519 | 0 |
| CHB | chr1 | AMY1A | 102205519 | 0 |
| CHB | chr1 | AMY1A | 102255519 | 0 |
| CHB | chr1 | AMY1A | 102305519 | 0 |
| CHB | chr1 | AMY1A | 102355519 | 0 |
| CHB | chr1 | AMY1A | 102405519 | 0 |
| CHB | chr1 | AMY1A | 102455519 | 0 |
| CHB | chr1 | AMY1A | 102505519 | 0 |
| CHB | chr1 | AMY1A | 102555519 | 0 |
| CHB | chr1 | AMY1A | 102605519 | 0 |

### 3\_Introgression\_data

|     |      |       |           |   |
|-----|------|-------|-----------|---|
| CHB | chr1 | AMY1A | 102655519 | 0 |
| CHB | chr1 | AMY1A | 102705519 | 0 |
| CHB | chr1 | AMY1A | 102755519 | 0 |
| CHB | chr1 | AMY1A | 102805519 | 0 |
| CHB | chr1 | AMY1A | 102855519 | 0 |
| CHB | chr1 | AMY1A | 102905519 | 0 |
| CHB | chr1 | AMY1A | 102955519 | 0 |
| CHB | chr1 | AMY1A | 103005519 | 0 |
| CHB | chr1 | AMY1A | 103055519 | 0 |
| CHB | chr1 | AMY1A | 103105519 | 0 |
| CHB | chr1 | AMY1A | 103155519 | 0 |
| CHB | chr1 | AMY1A | 103205519 | 0 |
| CHB | chr1 | AMY1A | 103255519 | 0 |
| CHB | chr1 | AMY1A | 103305519 | 0 |
| CHB | chr1 | AMY1A | 103355519 | 0 |
| CHB | chr1 | AMY1A | 103405519 | 0 |
| CHB | chr1 | AMY1A | 103455519 | 0 |
| CHB | chr1 | AMY1A | 103505519 | 0 |
| CHB | chr1 | AMY1A | 103555519 | 0 |
| CHB | chr1 | AMY1A | 103605519 | 0 |
| CHB | chr1 | AMY1A | 103655519 | 0 |
| CHB | chr1 | AMY1A | 103705519 | 0 |
| CHB | chr1 | AMY1A | 103755519 | 0 |
| CHB | chr1 | AMY1A | 103805519 | 0 |
| CHB | chr1 | AMY1A | 103855519 | 0 |
| CHB | chr1 | AMY1A | 103905519 | 0 |
| CHB | chr1 | AMY1A | 103955519 | 0 |
| CHB | chr1 | AMY1A | 104005519 | 0 |
| CHB | chr1 | AMY1A | 104055519 | 0 |
| CHB | chr1 | AMY1A | 104105519 | 0 |
| CHB | chr1 | AMY1A | 104155519 | 0 |
| CHB | chr1 | AMY1A | 104205519 | 0 |
| CHB | chr1 | AMY1A | 104255519 | 0 |
| CHB | chr1 | AMY1A | 104305519 | 0 |
| CHB | chr1 | AMY1A | 104355519 | 0 |
| CHB | chr1 | AMY1A | 104405519 | 0 |
| CHB | chr1 | AMY1A | 104455519 | 0 |
| CHB | chr1 | AMY1A | 104505519 | 0 |
| CHB | chr1 | AMY1A | 104555519 | 0 |
| CHB | chr1 | AMY1A | 104605519 | 0 |
| CHB | chr1 | AMY1A | 104655519 | 0 |
| CHB | chr1 | AMY1A | 104705519 | 0 |
| CHB | chr1 | AMY1A | 104755519 | 0 |
| CHB | chr1 | AMY1A | 104805519 | 0 |
| CHB | chr1 | AMY1A | 104855519 | 0 |
| CHB | chr1 | AMY1A | 104905519 | 0 |
| CHB | chr1 | AMY1A | 104955519 | 0 |
| CHB | chr1 | AMY1A | 105005519 | 0 |
| CHB | chr1 | AMY1A | 105055519 | 0 |

## 3\_Introgression\_data

|     |      |       |           |   |
|-----|------|-------|-----------|---|
| CHB | chr1 | AMY1A | 105105519 | 0 |
| CHB | chr1 | AMY1A | 105155519 | 0 |
| CHB | chr1 | AMY1A | 105205519 | 0 |
| CHB | chr1 | AMY1A | 105255519 | 0 |
| CHB | chr1 | AMY1A | 105305519 | 0 |
| CHB | chr1 | AMY1A | 105355519 | 0 |
| CHB | chr1 | AMY1A | 105405519 | 0 |
| CHB | chr1 | AMY1A | 105455519 | 0 |
| CHB | chr1 | AMY1A | 105505519 | 0 |
| CHB | chr1 | AMY1A | 105555519 | 0 |
| CHB | chr1 | AMY1A | 105605519 | 0 |
| CHB | chr1 | AMY1A | 105655519 | 0 |
| CHB | chr1 | AMY1A | 105705519 | 0 |
| CHB | chr1 | AMY1A | 105755519 | 0 |
| CHB | chr1 | AMY1A | 105805519 | 0 |
| CHB | chr1 | AMY1A | 105855519 | 0 |
| CHB | chr1 | AMY1A | 105905519 | 0 |
| CHB | chr1 | AMY1A | 105955519 | 0 |
| CHB | chr1 | AMY1A | 106005519 | 0 |
| CHB | chr1 | AMY1A | 106055519 | 0 |
| CHB | chr1 | AMY1A | 106105519 | 0 |
| CHB | chr1 | AMY1A | 106155519 | 0 |
| CHB | chr1 | AMY1A | 106205519 | 0 |
| CHB | chr1 | AMY1A | 106255519 | 0 |
| CHB | chr1 | AMY1A | 106305519 | 0 |
| CHB | chr1 | AMY1A | 106355519 | 0 |
| CHB | chr1 | AMY1A | 106405519 | 0 |
| CHB | chr1 | AMY1A | 106455519 | 0 |
| CHB | chr1 | AMY1A | 106505519 | 0 |
| CHB | chr1 | AMY1A | 106555519 | 0 |
| CHB | chr1 | AMY1A | 106605519 | 0 |
| CHB | chr1 | AMY1A | 106655519 | 0 |
| CHB | chr1 | AMY1A | 106705519 | 0 |
| CHB | chr1 | AMY1A | 106755519 | 0 |
| CHB | chr1 | AMY1A | 106805519 | 0 |
| CHB | chr1 | AMY1A | 106855519 | 0 |
| CHB | chr1 | AMY1A | 106905519 | 0 |
| CHB | chr1 | AMY1A | 106955519 | 0 |
| CHB | chr1 | AMY1A | 107005519 | 0 |
| CHB | chr1 | AMY1A | 107055519 | 0 |
| CHB | chr1 | AMY1A | 107105519 | 0 |
| CHB | chr1 | AMY1A | 107155519 | 0 |
| CHB | chr1 | AMY1A | 107205519 | 0 |
| CHB | chr1 | AMY1A | 107255519 | 0 |
| CHB | chr1 | AMY1A | 107305519 | 0 |
| CHB | chr1 | AMY1A | 107355519 | 0 |
| CHB | chr1 | AMY1A | 107405519 | 0 |
| CHB | chr1 | AMY1A | 107455519 | 0 |
| CHB | chr1 | AMY1A | 107505519 | 0 |

## 3\_Introgression\_data

|     |       |        |           |   |
|-----|-------|--------|-----------|---|
| CHB | chr1  | AMY1A  | 107555519 | 0 |
| CHB | chr1  | AMY1A  | 107605519 | 0 |
| CHB | chr1  | AMY1A  | 107655519 | 0 |
| CHB | chr1  | AMY1A  | 107705519 | 0 |
| CHB | chr1  | AMY1A  | 107755519 | 0 |
| CHB | chr1  | AMY1A  | 107805519 | 0 |
| CHB | chr1  | AMY1A  | 107855519 | 0 |
| CHB | chr1  | AMY1A  | 107905519 | 0 |
| CHB | chr1  | AMY1A  | 107955519 | 0 |
| CHB | chr1  | AMY1A  | 108005519 | 0 |
| CHB | chr1  | AMY1A  | 108055519 | 0 |
| CHB | chr1  | AMY1A  | 108105519 | 0 |
| CHB | chr1  | AMY1A  | 108155519 | 0 |
| CHB | chr1  | AMY1A  | 108205519 | 0 |
| CHB | chr1  | AMY1A  | 108255519 | 0 |
| CHB | chr1  | AMY1A  | 108305519 | 0 |
| CHB | chr1  | AMY1A  | 108355519 | 0 |
| CHB | chr1  | AMY1A  | 108405519 | 0 |
| CHB | chr1  | AMY1A  | 108455519 | 0 |
| CHB | chr1  | AMY1A  | 108505519 | 0 |
| CHB | chr1  | AMY1A  | 108555519 | 0 |
| CHB | chr1  | AMY1A  | 108605519 | 0 |
| CHB | chr16 | BOLA2B | 24503588  | 0 |
| CHB | chr16 | BOLA2B | 24553588  | 0 |
| CHB | chr16 | BOLA2B | 24603588  | 0 |
| CHB | chr16 | BOLA2B | 24653588  | 0 |
| CHB | chr16 | BOLA2B | 24703588  | 0 |
| CHB | chr16 | BOLA2B | 24753588  | 0 |
| CHB | chr16 | BOLA2B | 24803588  | 0 |
| CHB | chr16 | BOLA2B | 24853588  | 0 |
| CHB | chr16 | BOLA2B | 24903588  | 0 |
| CHB | chr16 | BOLA2B | 24953588  | 0 |
| CHB | chr16 | BOLA2B | 25003588  | 0 |
| CHB | chr16 | BOLA2B | 25053588  | 0 |
| CHB | chr16 | BOLA2B | 25103588  | 0 |
| CHB | chr16 | BOLA2B | 25153588  | 0 |
| CHB | chr16 | BOLA2B | 25203588  | 0 |
| CHB | chr16 | BOLA2B | 25253588  | 0 |
| CHB | chr16 | BOLA2B | 25303588  | 0 |
| CHB | chr16 | BOLA2B | 25353588  | 0 |
| CHB | chr16 | BOLA2B | 25403588  | 0 |
| CHB | chr16 | BOLA2B | 25453588  | 0 |
| CHB | chr16 | BOLA2B | 25503588  | 0 |
| CHB | chr16 | BOLA2B | 25553588  | 0 |
| CHB | chr16 | BOLA2B | 25603588  | 0 |
| CHB | chr16 | BOLA2B | 25653588  | 0 |
| CHB | chr16 | BOLA2B | 25703588  | 0 |
| CHB | chr16 | BOLA2B | 25753588  | 0 |
| CHB | chr16 | BOLA2B | 25803588  | 0 |

## 3\_Introgression\_data

|     |       |        |          |    |
|-----|-------|--------|----------|----|
| CHB | chr16 | BOLA2B | 25853588 | 0  |
| CHB | chr16 | BOLA2B | 25903588 | 7  |
| CHB | chr16 | BOLA2B | 25953588 | 38 |
| CHB | chr16 | BOLA2B | 26003588 | 31 |
| CHB | chr16 | BOLA2B | 26053588 | 0  |
| CHB | chr16 | BOLA2B | 26103588 | 0  |
| CHB | chr16 | BOLA2B | 26153588 | 0  |
| CHB | chr16 | BOLA2B | 26203588 | 0  |
| CHB | chr16 | BOLA2B | 26253588 | 0  |
| CHB | chr16 | BOLA2B | 26303588 | 0  |
| CHB | chr16 | BOLA2B | 26353588 | 0  |
| CHB | chr16 | BOLA2B | 26403588 | 0  |
| CHB | chr16 | BOLA2B | 26453588 | 0  |
| CHB | chr16 | BOLA2B | 26503588 | 0  |
| CHB | chr16 | BOLA2B | 26553588 | 0  |
| CHB | chr16 | BOLA2B | 26603588 | 0  |
| CHB | chr16 | BOLA2B | 26653588 | 0  |
| CHB | chr16 | BOLA2B | 26703588 | 0  |
| CHB | chr16 | BOLA2B | 26753588 | 0  |
| CHB | chr16 | BOLA2B | 26803588 | 0  |
| CHB | chr16 | BOLA2B | 26853588 | 0  |
| CHB | chr16 | BOLA2B | 26903588 | 0  |
| CHB | chr16 | BOLA2B | 26953588 | 0  |
| CHB | chr16 | BOLA2B | 27003588 | 0  |
| CHB | chr16 | BOLA2B | 27053588 | 0  |
| CHB | chr16 | BOLA2B | 27103588 | 0  |
| CHB | chr16 | BOLA2B | 27153588 | 0  |
| CHB | chr16 | BOLA2B | 27203588 | 0  |
| CHB | chr16 | BOLA2B | 27253588 | 0  |
| CHB | chr16 | BOLA2B | 27303588 | 0  |
| CHB | chr16 | BOLA2B | 27353588 | 0  |
| CHB | chr16 | BOLA2B | 27403588 | 0  |
| CHB | chr16 | BOLA2B | 27453588 | 0  |
| CHB | chr16 | BOLA2B | 27503588 | 0  |
| CHB | chr16 | BOLA2B | 27553588 | 0  |
| CHB | chr16 | BOLA2B | 27603588 | 0  |
| CHB | chr16 | BOLA2B | 27653588 | 0  |
| CHB | chr16 | BOLA2B | 27703588 | 0  |
| CHB | chr16 | BOLA2B | 27753588 | 0  |
| CHB | chr16 | BOLA2B | 27803588 | 0  |
| CHB | chr16 | BOLA2B | 27853588 | 0  |
| CHB | chr16 | BOLA2B | 27903588 | 0  |
| CHB | chr16 | BOLA2B | 27953588 | 0  |
| CHB | chr16 | BOLA2B | 28003588 | 0  |
| CHB | chr16 | BOLA2B | 28053588 | 0  |
| CHB | chr16 | BOLA2B | 28103588 | 0  |
| CHB | chr16 | BOLA2B | 28153588 | 0  |
| CHB | chr16 | BOLA2B | 28203588 | 0  |
| CHB | chr16 | BOLA2B | 28253588 | 0  |

## 3\_Introgression\_data

|     |       |        |          |   |
|-----|-------|--------|----------|---|
| CHB | chr16 | BOLA2B | 28303588 | 0 |
| CHB | chr16 | BOLA2B | 28353588 | 0 |
| CHB | chr16 | BOLA2B | 28403588 | 0 |
| CHB | chr16 | BOLA2B | 28453588 | 0 |
| CHB | chr16 | BOLA2B | 28503588 | 0 |
| CHB | chr16 | BOLA2B | 28553588 | 0 |
| CHB | chr16 | BOLA2B | 28603588 | 0 |
| CHB | chr16 | BOLA2B | 28653588 | 0 |
| CHB | chr16 | BOLA2B | 28703588 | 0 |
| CHB | chr16 | BOLA2B | 28753588 | 0 |
| CHB | chr16 | BOLA2B | 28803588 | 0 |
| CHB | chr16 | BOLA2B | 28853588 | 0 |
| CHB | chr16 | BOLA2B | 28903588 | 0 |
| CHB | chr16 | BOLA2B | 28953588 | 0 |
| CHB | chr16 | BOLA2B | 29003588 | 0 |
| CHB | chr16 | BOLA2B | 29053588 | 0 |
| CHB | chr16 | BOLA2B | 29103588 | 0 |
| CHB | chr16 | BOLA2B | 29153588 | 0 |
| CHB | chr16 | BOLA2B | 29203588 | 0 |
| CHB | chr16 | BOLA2B | 29253588 | 0 |
| CHB | chr16 | BOLA2B | 29303588 | 0 |
| CHB | chr16 | BOLA2B | 29353588 | 0 |
| CHB | chr16 | BOLA2B | 29403588 | 0 |
| CHB | chr16 | BOLA2B | 29453588 | 0 |
| CHB | chr16 | BOLA2B | 29503588 | 0 |
| CHB | chr16 | BOLA2B | 29553588 | 0 |
| CHB | chr16 | BOLA2B | 29603588 | 0 |
| CHB | chr16 | BOLA2B | 29653588 | 0 |
| CHB | chr16 | BOLA2B | 29703588 | 0 |
| CHB | chr16 | BOLA2B | 29753588 | 0 |
| CHB | chr16 | BOLA2B | 29803588 | 0 |
| CHB | chr16 | BOLA2B | 29853588 | 0 |
| CHB | chr16 | BOLA2B | 29903588 | 0 |
| CHB | chr16 | BOLA2B | 29953588 | 0 |
| CHB | chr16 | BOLA2B | 30003588 | 0 |
| CHB | chr16 | BOLA2B | 30053588 | 0 |
| CHB | chr16 | BOLA2B | 30103588 | 0 |
| CHB | chr16 | BOLA2B | 30153588 | 0 |
| CHB | chr16 | BOLA2B | 30203588 | 0 |
| CHB | chr16 | BOLA2B | 30253588 | 0 |
| CHB | chr16 | BOLA2B | 30303588 | 0 |
| CHB | chr16 | BOLA2B | 30353588 | 0 |
| CHB | chr16 | BOLA2B | 30403588 | 0 |
| CHB | chr16 | BOLA2B | 30453588 | 0 |
| CHB | chr16 | BOLA2B | 30503588 | 0 |
| CHB | chr16 | BOLA2B | 30553588 | 0 |
| CHB | chr16 | BOLA2B | 30603588 | 0 |
| CHB | chr16 | BOLA2B | 30653588 | 0 |
| CHB | chr16 | BOLA2B | 30703588 | 0 |

## 3\_Introgression\_data

|     |       |        |          |   |
|-----|-------|--------|----------|---|
| CHB | chr16 | BOLA2B | 30753588 | 0 |
| CHB | chr16 | BOLA2B | 30803588 | 0 |
| CHB | chr16 | BOLA2B | 30853588 | 0 |
| CHB | chr16 | BOLA2B | 30903588 | 0 |
| CHB | chr16 | BOLA2B | 30953588 | 0 |
| CHB | chr16 | BOLA2B | 31003588 | 0 |
| CHB | chr16 | BOLA2B | 31053588 | 0 |
| CHB | chr16 | BOLA2B | 31103588 | 0 |
| CHB | chr16 | BOLA2B | 31153588 | 0 |
| CHB | chr16 | BOLA2B | 31203588 | 0 |
| CHB | chr16 | BOLA2B | 31253588 | 0 |
| CHB | chr16 | BOLA2B | 31303588 | 0 |
| CHB | chr16 | BOLA2B | 31353588 | 0 |
| CHB | chr16 | BOLA2B | 31403588 | 0 |
| CHB | chr16 | BOLA2B | 31453588 | 0 |
| CHB | chr16 | BOLA2B | 31503588 | 0 |
| CHB | chr16 | BOLA2B | 31553588 | 0 |
| CHB | chr16 | BOLA2B | 31603588 | 0 |
| CHB | chr16 | BOLA2B | 31653588 | 0 |
| CHB | chr16 | BOLA2B | 31703588 | 0 |
| CHB | chr16 | BOLA2B | 31753588 | 0 |
| CHB | chr16 | BOLA2B | 31803588 | 0 |
| CHB | chr16 | BOLA2B | 31853588 | 0 |
| CHB | chr16 | BOLA2B | 31903588 | 0 |
| CHB | chr16 | BOLA2B | 31953588 | 0 |
| CHB | chr16 | BOLA2B | 32003588 | 0 |
| CHB | chr16 | BOLA2B | 32053588 | 0 |
| CHB | chr16 | BOLA2B | 32103588 | 0 |
| CHB | chr16 | BOLA2B | 32153588 | 0 |
| CHB | chr16 | BOLA2B | 32203588 | 0 |
| CHB | chr16 | BOLA2B | 32253588 | 0 |
| CHB | chr16 | BOLA2B | 32303588 | 0 |
| CHB | chr16 | BOLA2B | 32353588 | 0 |
| CHB | chr16 | BOLA2B | 32403588 | 0 |
| CHB | chr16 | BOLA2B | 32453588 | 0 |
| CHB | chr16 | BOLA2B | 32503588 | 0 |
| CHB | chr16 | BOLA2B | 32553588 | 0 |
| CHB | chr16 | BOLA2B | 32603588 | 0 |
| CHB | chr16 | BOLA2B | 32653588 | 0 |
| CHB | chr16 | BOLA2B | 32703588 | 0 |
| CHB | chr16 | BOLA2B | 32753588 | 0 |
| CHB | chr16 | BOLA2B | 32803588 | 0 |
| CHB | chr16 | BOLA2B | 32853588 | 0 |
| CHB | chr16 | BOLA2B | 32903588 | 0 |
| CHB | chr16 | BOLA2B | 32953588 | 0 |
| CHB | chr16 | BOLA2B | 33003588 | 0 |
| CHB | chr16 | BOLA2B | 33053588 | 0 |
| CHB | chr16 | BOLA2B | 33103588 | 0 |
| CHB | chr16 | BOLA2B | 33153588 | 0 |

## 3\_Introgression\_data

|     |       |        |          |   |
|-----|-------|--------|----------|---|
| CHB | chr16 | BOLA2B | 33203588 | 0 |
| CHB | chr16 | BOLA2B | 33253588 | 0 |
| CHB | chr16 | BOLA2B | 33303588 | 0 |
| CHB | chr16 | BOLA2B | 33353588 | 0 |
| CHB | chr16 | BOLA2B | 33403588 | 0 |
| CHB | chr16 | BOLA2B | 33453588 | 0 |
| CHB | chr16 | BOLA2B | 33503588 | 0 |
| CHB | chr16 | BOLA2B | 33553588 | 0 |
| CHB | chr16 | BOLA2B | 33603588 | 0 |
| CHB | chr16 | BOLA2B | 33653588 | 0 |
| CHB | chr16 | BOLA2B | 33703588 | 0 |
| CHB | chr16 | BOLA2B | 33753588 | 0 |
| CHB | chr16 | BOLA2B | 33803588 | 0 |
| CHB | chr16 | BOLA2B | 33853588 | 0 |
| CHB | chr16 | BOLA2B | 33903588 | 0 |
| CHB | chr16 | BOLA2B | 33953588 | 0 |
| CHB | chr16 | BOLA2B | 34003588 | 0 |
| CHB | chr16 | BOLA2B | 34053588 | 0 |
| CHB | chr16 | BOLA2B | 34103588 | 0 |
| CHB | chr16 | BOLA2B | 34153588 | 0 |
| CHB | chr16 | BOLA2B | 34203588 | 0 |
| CHB | chr16 | BOLA2B | 34253588 | 0 |
| CHB | chr16 | BOLA2B | 34303588 | 0 |
| CHB | chr16 | BOLA2B | 34353588 | 0 |
| CHB | chr16 | BOLA2B | 34403588 | 0 |
| CHB | chr9  | CBWD3  | 60716374 | 0 |
| CHB | chr9  | CBWD3  | 60766374 | 0 |
| CHB | chr9  | CBWD3  | 60816374 | 0 |
| CHB | chr9  | CBWD3  | 60866374 | 0 |
| CHB | chr9  | CBWD3  | 60916374 | 0 |
| CHB | chr9  | CBWD3  | 60966374 | 0 |
| CHB | chr9  | CBWD3  | 61016374 | 0 |
| CHB | chr9  | CBWD3  | 61066374 | 0 |
| CHB | chr9  | CBWD3  | 61116374 | 0 |
| CHB | chr9  | CBWD3  | 61166374 | 0 |
| CHB | chr9  | CBWD3  | 61216374 | 0 |
| CHB | chr9  | CBWD3  | 61266374 | 0 |
| CHB | chr9  | CBWD3  | 61316374 | 0 |
| CHB | chr9  | CBWD3  | 61366374 | 0 |
| CHB | chr9  | CBWD3  | 61416374 | 0 |
| CHB | chr9  | CBWD3  | 61466374 | 0 |
| CHB | chr9  | CBWD3  | 61516374 | 0 |
| CHB | chr9  | CBWD3  | 61566374 | 0 |
| CHB | chr9  | CBWD3  | 61616374 | 0 |
| CHB | chr9  | CBWD3  | 61666374 | 0 |
| CHB | chr9  | CBWD3  | 61716374 | 0 |
| CHB | chr9  | CBWD3  | 61766374 | 0 |
| CHB | chr9  | CBWD3  | 61816374 | 0 |
| CHB | chr9  | CBWD3  | 61866374 | 0 |



## 3\_Introgression\_data

|     |      |       |          |   |
|-----|------|-------|----------|---|
| CHB | chr9 | CBWD3 | 61916374 | 0 |
| CHB | chr9 | CBWD3 | 61966374 | 0 |
| CHB | chr9 | CBWD3 | 62016374 | 0 |
| CHB | chr9 | CBWD3 | 62066374 | 0 |
| CHB | chr9 | CBWD3 | 62116374 | 0 |
| CHB | chr9 | CBWD3 | 62166374 | 0 |
| CHB | chr9 | CBWD3 | 62216374 | 0 |
| CHB | chr9 | CBWD3 | 62266374 | 0 |
| CHB | chr9 | CBWD3 | 62316374 | 0 |
| CHB | chr9 | CBWD3 | 62366374 | 0 |
| CHB | chr9 | CBWD3 | 62416374 | 0 |
| CHB | chr9 | CBWD3 | 62466374 | 0 |
| CHB | chr9 | CBWD3 | 62516374 | 0 |
| CHB | chr9 | CBWD3 | 62566374 | 0 |
| CHB | chr9 | CBWD3 | 62616374 | 0 |
| CHB | chr9 | CBWD3 | 62666374 | 0 |
| CHB | chr9 | CBWD3 | 62716374 | 0 |
| CHB | chr9 | CBWD3 | 62766374 | 0 |
| CHB | chr9 | CBWD3 | 62816374 | 0 |
| CHB | chr9 | CBWD3 | 62866374 | 0 |
| CHB | chr9 | CBWD3 | 62916374 | 0 |
| CHB | chr9 | CBWD3 | 62966374 | 0 |
| CHB | chr9 | CBWD3 | 63016374 | 0 |
| CHB | chr9 | CBWD3 | 63066374 | 0 |
| CHB | chr9 | CBWD3 | 63116374 | 0 |
| CHB | chr9 | CBWD3 | 63166374 | 0 |
| CHB | chr9 | CBWD3 | 63216374 | 0 |
| CHB | chr9 | CBWD3 | 63266374 | 0 |
| CHB | chr9 | CBWD3 | 63316374 | 0 |
| CHB | chr9 | CBWD3 | 63366374 | 0 |
| CHB | chr9 | CBWD3 | 63416374 | 0 |
| CHB | chr9 | CBWD3 | 63466374 | 0 |
| CHB | chr9 | CBWD3 | 63516374 | 0 |
| CHB | chr9 | CBWD3 | 63566374 | 0 |
| CHB | chr9 | CBWD3 | 63616374 | 0 |
| CHB | chr9 | CBWD3 | 63666374 | 0 |
| CHB | chr9 | CBWD3 | 63716374 | 0 |
| CHB | chr9 | CBWD3 | 63766374 | 0 |
| CHB | chr9 | CBWD3 | 63816374 | 0 |
| CHB | chr9 | CBWD3 | 63866374 | 0 |
| CHB | chr9 | CBWD3 | 63916374 | 0 |
| CHB | chr9 | CBWD3 | 63966374 | 0 |
| CHB | chr9 | CBWD3 | 64016374 | 0 |
| CHB | chr9 | CBWD3 | 64066374 | 0 |
| CHB | chr9 | CBWD3 | 64116374 | 0 |
| CHB | chr9 | CBWD3 | 64166374 | 0 |
| CHB | chr9 | CBWD3 | 64216374 | 0 |
| CHB | chr9 | CBWD3 | 64266374 | 0 |
| CHB | chr9 | CBWD3 | 64316374 | 0 |

## 3\_Introgression\_data

|     |      |       |          |    |
|-----|------|-------|----------|----|
| CHB | chr9 | CBWD3 | 64366374 | 0  |
| CHB | chr9 | CBWD3 | 64416374 | 0  |
| CHB | chr9 | CBWD3 | 64466374 | 0  |
| CHB | chr9 | CBWD3 | 64516374 | 0  |
| CHB | chr9 | CBWD3 | 64566374 | 0  |
| CHB | chr9 | CBWD3 | 64616374 | 0  |
| CHB | chr9 | CBWD3 | 64666374 | 0  |
| CHB | chr9 | CBWD3 | 64716374 | 0  |
| CHB | chr9 | CBWD3 | 64766374 | 0  |
| CHB | chr9 | CBWD3 | 64816374 | 0  |
| CHB | chr9 | CBWD3 | 64866374 | 0  |
| CHB | chr9 | CBWD3 | 64916374 | 0  |
| CHB | chr9 | CBWD3 | 64966374 | 0  |
| CHB | chr9 | CBWD3 | 65016374 | 0  |
| CHB | chr9 | CBWD3 | 65066374 | 0  |
| CHB | chr9 | CBWD3 | 65116374 | 0  |
| CHB | chr9 | CBWD3 | 65166374 | 0  |
| CHB | chr9 | CBWD3 | 65216374 | 0  |
| CHB | chr9 | CBWD3 | 65266374 | 0  |
| CHB | chr9 | CBWD3 | 65316374 | 0  |
| CHB | chr9 | CBWD3 | 65366374 | 0  |
| CHB | chr9 | CBWD3 | 65416374 | 0  |
| CHB | chr9 | CBWD3 | 65466374 | 0  |
| CHB | chr9 | CBWD3 | 65516374 | 0  |
| CHB | chr9 | CBWD3 | 65566374 | 12 |
| CHB | chr9 | CBWD3 | 65616374 | 26 |
| CHB | chr9 | CBWD3 | 65666374 | 14 |
| CHB | chr9 | CBWD3 | 65716374 | 0  |
| CHB | chr9 | CBWD3 | 65766374 | 0  |
| CHB | chr9 | CBWD3 | 65816374 | 0  |
| CHB | chr9 | CBWD3 | 65866374 | 0  |
| CHB | chr9 | CBWD3 | 65916374 | 0  |
| CHB | chr9 | CBWD3 | 65966374 | 0  |
| CHB | chr9 | CBWD3 | 66016374 | 0  |
| CHB | chr9 | CBWD3 | 66066374 | 0  |
| CHB | chr9 | CBWD3 | 66116374 | 0  |
| CHB | chr9 | CBWD3 | 66166374 | 0  |
| CHB | chr9 | CBWD3 | 66216374 | 0  |
| CHB | chr9 | CBWD3 | 66266374 | 0  |
| CHB | chr9 | CBWD3 | 66316374 | 0  |
| CHB | chr9 | CBWD3 | 66366374 | 0  |
| CHB | chr9 | CBWD3 | 66416374 | 0  |
| CHB | chr9 | CBWD3 | 66466374 | 0  |
| CHB | chr9 | CBWD3 | 66516374 | 0  |
| CHB | chr9 | CBWD3 | 66566374 | 0  |
| CHB | chr9 | CBWD3 | 66616374 | 3  |
| CHB | chr9 | CBWD3 | 66666374 | 19 |
| CHB | chr9 | CBWD3 | 66716374 | 24 |
| CHB | chr9 | CBWD3 | 66766374 | 20 |

## 3\_Introgression\_data

|     |      |       |          |    |
|-----|------|-------|----------|----|
| CHB | chr9 | CBWD3 | 66816374 | 15 |
| CHB | chr9 | CBWD3 | 66866374 | 3  |
| CHB | chr9 | CBWD3 | 66916374 | 0  |
| CHB | chr9 | CBWD3 | 66966374 | 0  |
| CHB | chr9 | CBWD3 | 67016374 | 0  |
| CHB | chr9 | CBWD3 | 67066374 | 0  |
| CHB | chr9 | CBWD3 | 67116374 | 0  |
| CHB | chr9 | CBWD3 | 67166374 | 0  |
| CHB | chr9 | CBWD3 | 67216374 | 0  |
| CHB | chr9 | CBWD3 | 67266374 | 0  |
| CHB | chr9 | CBWD3 | 67316374 | 0  |
| CHB | chr9 | CBWD3 | 67366374 | 0  |
| CHB | chr9 | CBWD3 | 67416374 | 0  |
| CHB | chr9 | CBWD3 | 67466374 | 0  |
| CHB | chr9 | CBWD3 | 67516374 | 0  |
| CHB | chr9 | CBWD3 | 67566374 | 0  |
| CHB | chr9 | CBWD3 | 67616374 | 0  |
| CHB | chr9 | CBWD3 | 67666374 | 0  |
| CHB | chr9 | CBWD3 | 67716374 | 0  |
| CHB | chr9 | CBWD3 | 67766374 | 0  |
| CHB | chr9 | CBWD3 | 67816374 | 0  |
| CHB | chr9 | CBWD3 | 67866374 | 0  |
| CHB | chr9 | CBWD3 | 67916374 | 0  |
| CHB | chr9 | CBWD3 | 67966374 | 0  |
| CHB | chr9 | CBWD3 | 68016374 | 0  |
| CHB | chr9 | CBWD3 | 68066374 | 0  |
| CHB | chr9 | CBWD3 | 68116374 | 0  |
| CHB | chr9 | CBWD3 | 68166374 | 0  |
| CHB | chr9 | CBWD3 | 68216374 | 0  |
| CHB | chr9 | CBWD3 | 68266374 | 0  |
| CHB | chr9 | CBWD3 | 68316374 | 0  |
| CHB | chr9 | CBWD3 | 68366374 | 0  |
| CHB | chr9 | CBWD3 | 68416374 | 0  |
| CHB | chr9 | CBWD3 | 68466374 | 0  |
| CHB | chr9 | CBWD3 | 68516374 | 0  |
| CHB | chr9 | CBWD3 | 68566374 | 0  |
| CHB | chr9 | CBWD3 | 68616374 | 0  |
| CHB | chr9 | CBWD3 | 68666374 | 0  |
| CHB | chr9 | CBWD3 | 68716374 | 0  |
| CHB | chr9 | CBWD3 | 68766374 | 0  |
| CHB | chr9 | CBWD3 | 68816374 | 0  |
| CHB | chr9 | CBWD3 | 68866374 | 0  |
| CHB | chr9 | CBWD3 | 68916374 | 0  |
| CHB | chr9 | CBWD3 | 68966374 | 0  |
| CHB | chr9 | CBWD3 | 69016374 | 0  |
| CHB | chr9 | CBWD3 | 69066374 | 0  |
| CHB | chr9 | CBWD3 | 69116374 | 0  |
| CHB | chr9 | CBWD3 | 69166374 | 0  |
| CHB | chr9 | CBWD3 | 69216374 | 0  |

3\_Introgression\_data

|     |       |         |          |    |
|-----|-------|---------|----------|----|
| CHB | chr9  | CBWD3   | 69266374 | 0  |
| CHB | chr9  | CBWD3   | 69316374 | 0  |
| CHB | chr9  | CBWD3   | 69366374 | 0  |
| CHB | chr9  | CBWD3   | 69416374 | 0  |
| CHB | chr9  | CBWD3   | 69466374 | 0  |
| CHB | chr9  | CBWD3   | 69516374 | 0  |
| CHB | chr9  | CBWD3   | 69566374 | 0  |
| CHB | chr9  | CBWD3   | 69616374 | 0  |
| CHB | chr9  | CBWD3   | 69666374 | 0  |
| CHB | chr9  | CBWD3   | 69716374 | 0  |
| CHB | chr9  | CBWD3   | 69766374 | 3  |
| CHB | chr9  | CBWD3   | 69816374 | 15 |
| CHB | chr9  | CBWD3   | 69866374 | 51 |
| CHB | chr9  | CBWD3   | 69916374 | 87 |
| CHB | chr9  | CBWD3   | 69966374 | 83 |
| CHB | chr9  | CBWD3   | 70016374 | 35 |
| CHB | chr9  | CBWD3   | 70066374 | 0  |
| CHB | chr9  | CBWD3   | 70116374 | 0  |
| CHB | chr9  | CBWD3   | 70166374 | 0  |
| CHB | chr9  | CBWD3   | 70216374 | 0  |
| CHB | chr9  | CBWD3   | 70266374 | 0  |
| CHB | chr9  | CBWD3   | 70316374 | 0  |
| CHB | chr9  | CBWD3   | 70366374 | 0  |
| CHB | chr9  | CBWD3   | 70416374 | 0  |
| CHB | chr9  | CBWD3   | 70466374 | 0  |
| CHB | chr9  | CBWD3   | 70516374 | 0  |
| CHB | chr9  | CBWD3   | 70566374 | 0  |
| CHB | chr9  | CBWD3   | 70616374 | 0  |
| CHB | chr9  | CBWD3   | 70666374 | 0  |
| CHB | chr16 | CLEC18A | 65000232 | 0  |
| CHB | chr16 | CLEC18A | 65050232 | 0  |
| CHB | chr16 | CLEC18A | 65100232 | 0  |
| CHB | chr16 | CLEC18A | 65150232 | 0  |
| CHB | chr16 | CLEC18A | 65200232 | 0  |
| CHB | chr16 | CLEC18A | 65250232 | 0  |
| CHB | chr16 | CLEC18A | 65300232 | 0  |
| CHB | chr16 | CLEC18A | 65350232 | 0  |
| CHB | chr16 | CLEC18A | 65400232 | 0  |
| CHB | chr16 | CLEC18A | 65450232 | 0  |
| CHB | chr16 | CLEC18A | 65500232 | 0  |
| CHB | chr16 | CLEC18A | 65550232 | 0  |
| CHB | chr16 | CLEC18A | 65600232 | 0  |
| CHB | chr16 | CLEC18A | 65650232 | 0  |
| CHB | chr16 | CLEC18A | 65700232 | 0  |
| CHB | chr16 | CLEC18A | 65750232 | 0  |
| CHB | chr16 | CLEC18A | 65800232 | 0  |
| CHB | chr16 | CLEC18A | 65850232 | 0  |
| CHB | chr16 | CLEC18A | 65900232 | 0  |
| CHB | chr16 | CLEC18A | 65950232 | 0  |

## 3\_Introgression\_data

|     |       |         |          |   |
|-----|-------|---------|----------|---|
| CHB | chr16 | CLEC18A | 66000232 | 0 |
| CHB | chr16 | CLEC18A | 66050232 | 0 |
| CHB | chr16 | CLEC18A | 66100232 | 0 |
| CHB | chr16 | CLEC18A | 66150232 | 0 |
| CHB | chr16 | CLEC18A | 66200232 | 0 |
| CHB | chr16 | CLEC18A | 66250232 | 0 |
| CHB | chr16 | CLEC18A | 66300232 | 0 |
| CHB | chr16 | CLEC18A | 66350232 | 0 |
| CHB | chr16 | CLEC18A | 66400232 | 0 |
| CHB | chr16 | CLEC18A | 66450232 | 0 |
| CHB | chr16 | CLEC18A | 66500232 | 0 |
| CHB | chr16 | CLEC18A | 66550232 | 0 |
| CHB | chr16 | CLEC18A | 66600232 | 0 |
| CHB | chr16 | CLEC18A | 66650232 | 0 |
| CHB | chr16 | CLEC18A | 66700232 | 0 |
| CHB | chr16 | CLEC18A | 66750232 | 0 |
| CHB | chr16 | CLEC18A | 66800232 | 0 |
| CHB | chr16 | CLEC18A | 66850232 | 0 |
| CHB | chr16 | CLEC18A | 66900232 | 0 |
| CHB | chr16 | CLEC18A | 66950232 | 0 |
| CHB | chr16 | CLEC18A | 67000232 | 0 |
| CHB | chr16 | CLEC18A | 67050232 | 0 |
| CHB | chr16 | CLEC18A | 67100232 | 0 |
| CHB | chr16 | CLEC18A | 67150232 | 0 |
| CHB | chr16 | CLEC18A | 67200232 | 0 |
| CHB | chr16 | CLEC18A | 67250232 | 0 |
| CHB | chr16 | CLEC18A | 67300232 | 0 |
| CHB | chr16 | CLEC18A | 67350232 | 0 |
| CHB | chr16 | CLEC18A | 67400232 | 0 |
| CHB | chr16 | CLEC18A | 67450232 | 0 |
| CHB | chr16 | CLEC18A | 67500232 | 0 |
| CHB | chr16 | CLEC18A | 67550232 | 0 |
| CHB | chr16 | CLEC18A | 67600232 | 0 |
| CHB | chr16 | CLEC18A | 67650232 | 0 |
| CHB | chr16 | CLEC18A | 67700232 | 0 |
| CHB | chr16 | CLEC18A | 67750232 | 0 |
| CHB | chr16 | CLEC18A | 67800232 | 0 |
| CHB | chr16 | CLEC18A | 67850232 | 0 |
| CHB | chr16 | CLEC18A | 67900232 | 0 |
| CHB | chr16 | CLEC18A | 67950232 | 0 |
| CHB | chr16 | CLEC18A | 68000232 | 0 |
| CHB | chr16 | CLEC18A | 68050232 | 0 |
| CHB | chr16 | CLEC18A | 68100232 | 0 |
| CHB | chr16 | CLEC18A | 68150232 | 0 |
| CHB | chr16 | CLEC18A | 68200232 | 0 |
| CHB | chr16 | CLEC18A | 68250232 | 0 |
| CHB | chr16 | CLEC18A | 68300232 | 0 |
| CHB | chr16 | CLEC18A | 68350232 | 0 |
| CHB | chr16 | CLEC18A | 68400232 | 0 |

## 3\_Introgression\_data

|     |       |         |          |   |
|-----|-------|---------|----------|---|
| CHB | chr16 | CLEC18A | 68450232 | 0 |
| CHB | chr16 | CLEC18A | 68500232 | 0 |
| CHB | chr16 | CLEC18A | 68550232 | 0 |
| CHB | chr16 | CLEC18A | 68600232 | 0 |
| CHB | chr16 | CLEC18A | 68650232 | 0 |
| CHB | chr16 | CLEC18A | 68700232 | 0 |
| CHB | chr16 | CLEC18A | 68750232 | 0 |
| CHB | chr16 | CLEC18A | 68800232 | 0 |
| CHB | chr16 | CLEC18A | 68850232 | 0 |
| CHB | chr16 | CLEC18A | 68900232 | 0 |
| CHB | chr16 | CLEC18A | 68950232 | 0 |
| CHB | chr16 | CLEC18A | 69000232 | 0 |
| CHB | chr16 | CLEC18A | 69050232 | 0 |
| CHB | chr16 | CLEC18A | 69100232 | 0 |
| CHB | chr16 | CLEC18A | 69150232 | 0 |
| CHB | chr16 | CLEC18A | 69200232 | 0 |
| CHB | chr16 | CLEC18A | 69250232 | 0 |
| CHB | chr16 | CLEC18A | 69300232 | 0 |
| CHB | chr16 | CLEC18A | 69350232 | 0 |
| CHB | chr16 | CLEC18A | 69400232 | 0 |
| CHB | chr16 | CLEC18A | 69450232 | 0 |
| CHB | chr16 | CLEC18A | 69500232 | 0 |
| CHB | chr16 | CLEC18A | 69550232 | 0 |
| CHB | chr16 | CLEC18A | 69600232 | 0 |
| CHB | chr16 | CLEC18A | 69650232 | 0 |
| CHB | chr16 | CLEC18A | 69700232 | 0 |
| CHB | chr16 | CLEC18A | 69750232 | 0 |
| CHB | chr16 | CLEC18A | 69800232 | 0 |
| CHB | chr16 | CLEC18A | 69850232 | 0 |
| CHB | chr16 | CLEC18A | 69900232 | 0 |
| CHB | chr16 | CLEC18A | 69950232 | 0 |
| CHB | chr16 | CLEC18A | 70000232 | 0 |
| CHB | chr16 | CLEC18A | 70050232 | 0 |
| CHB | chr16 | CLEC18A | 70100232 | 0 |
| CHB | chr16 | CLEC18A | 70150232 | 0 |
| CHB | chr16 | CLEC18A | 70200232 | 0 |
| CHB | chr16 | CLEC18A | 70250232 | 0 |
| CHB | chr16 | CLEC18A | 70300232 | 0 |
| CHB | chr16 | CLEC18A | 70350232 | 0 |
| CHB | chr16 | CLEC18A | 70400232 | 0 |
| CHB | chr16 | CLEC18A | 70450232 | 0 |
| CHB | chr16 | CLEC18A | 70500232 | 0 |
| CHB | chr16 | CLEC18A | 70550232 | 0 |
| CHB | chr16 | CLEC18A | 70600232 | 0 |
| CHB | chr16 | CLEC18A | 70650232 | 0 |
| CHB | chr16 | CLEC18A | 70700232 | 0 |
| CHB | chr16 | CLEC18A | 70750232 | 0 |
| CHB | chr16 | CLEC18A | 70800232 | 0 |
| CHB | chr16 | CLEC18A | 70850232 | 0 |

## 3\_Introgression\_data

|     |       |         |          |    |
|-----|-------|---------|----------|----|
| CHB | chr16 | CLEC18A | 70900232 | 0  |
| CHB | chr16 | CLEC18A | 70950232 | 0  |
| CHB | chr16 | CLEC18A | 71000232 | 0  |
| CHB | chr16 | CLEC18A | 71050232 | 0  |
| CHB | chr16 | CLEC18A | 71100232 | 0  |
| CHB | chr16 | CLEC18A | 71150232 | 0  |
| CHB | chr16 | CLEC18A | 71200232 | 0  |
| CHB | chr16 | CLEC18A | 71250232 | 0  |
| CHB | chr16 | CLEC18A | 71300232 | 0  |
| CHB | chr16 | CLEC18A | 71350232 | 0  |
| CHB | chr16 | CLEC18A | 71400232 | 0  |
| CHB | chr16 | CLEC18A | 71450232 | 0  |
| CHB | chr16 | CLEC18A | 71500232 | 0  |
| CHB | chr16 | CLEC18A | 71550232 | 0  |
| CHB | chr16 | CLEC18A | 71600232 | 0  |
| CHB | chr16 | CLEC18A | 71650232 | 0  |
| CHB | chr16 | CLEC18A | 71700232 | 0  |
| CHB | chr16 | CLEC18A | 71750232 | 0  |
| CHB | chr16 | CLEC18A | 71800232 | 0  |
| CHB | chr16 | CLEC18A | 71850232 | 0  |
| CHB | chr16 | CLEC18A | 71900232 | 0  |
| CHB | chr16 | CLEC18A | 71950232 | 0  |
| CHB | chr16 | CLEC18A | 72000232 | 0  |
| CHB | chr16 | CLEC18A | 72050232 | 0  |
| CHB | chr16 | CLEC18A | 72100232 | 0  |
| CHB | chr16 | CLEC18A | 72150232 | 0  |
| CHB | chr16 | CLEC18A | 72200232 | 0  |
| CHB | chr16 | CLEC18A | 72250232 | 0  |
| CHB | chr16 | CLEC18A | 72300232 | 0  |
| CHB | chr16 | CLEC18A | 72350232 | 0  |
| CHB | chr16 | CLEC18A | 72400232 | 0  |
| CHB | chr16 | CLEC18A | 72450232 | 0  |
| CHB | chr16 | CLEC18A | 72500232 | 0  |
| CHB | chr16 | CLEC18A | 72550232 | 0  |
| CHB | chr16 | CLEC18A | 72600232 | 0  |
| CHB | chr16 | CLEC18A | 72650232 | 0  |
| CHB | chr16 | CLEC18A | 72700232 | 0  |
| CHB | chr16 | CLEC18A | 72750232 | 0  |
| CHB | chr16 | CLEC18A | 72800232 | 0  |
| CHB | chr16 | CLEC18A | 72850232 | 0  |
| CHB | chr16 | CLEC18A | 72900232 | 16 |
| CHB | chr16 | CLEC18A | 72950232 | 45 |
| CHB | chr16 | CLEC18A | 73000232 | 46 |
| CHB | chr16 | CLEC18A | 73050232 | 38 |
| CHB | chr16 | CLEC18A | 73100232 | 27 |
| CHB | chr16 | CLEC18A | 73150232 | 6  |
| CHB | chr16 | CLEC18A | 73200232 | 0  |
| CHB | chr16 | CLEC18A | 73250232 | 0  |
| CHB | chr16 | CLEC18A | 73300232 | 0  |

## 3\_Introgression\_data

|     |       |         |           |    |
|-----|-------|---------|-----------|----|
| CHB | chr16 | CLEC18A | 73350232  | 0  |
| CHB | chr16 | CLEC18A | 73400232  | 0  |
| CHB | chr16 | CLEC18A | 73450232  | 0  |
| CHB | chr16 | CLEC18A | 73500232  | 0  |
| CHB | chr16 | CLEC18A | 73550232  | 0  |
| CHB | chr16 | CLEC18A | 73600232  | 0  |
| CHB | chr16 | CLEC18A | 73650232  | 0  |
| CHB | chr16 | CLEC18A | 73700232  | 0  |
| CHB | chr16 | CLEC18A | 73750232  | 0  |
| CHB | chr16 | CLEC18A | 73800232  | 0  |
| CHB | chr16 | CLEC18A | 73850232  | 0  |
| CHB | chr16 | CLEC18A | 73900232  | 0  |
| CHB | chr16 | CLEC18A | 73950232  | 0  |
| CHB | chr16 | CLEC18A | 74000232  | 0  |
| CHB | chr16 | CLEC18A | 74050232  | 0  |
| CHB | chr16 | CLEC18A | 74100232  | 0  |
| CHB | chr16 | CLEC18A | 74150232  | 0  |
| CHB | chr16 | CLEC18A | 74200232  | 0  |
| CHB | chr16 | CLEC18A | 74250232  | 0  |
| CHB | chr16 | CLEC18A | 74300232  | 0  |
| CHB | chr16 | CLEC18A | 74350232  | 0  |
| CHB | chr16 | CLEC18A | 74400232  | 9  |
| CHB | chr16 | CLEC18A | 74450232  | 55 |
| CHB | chr16 | CLEC18A | 74500232  | 59 |
| CHB | chr16 | CLEC18A | 74550232  | 29 |
| CHB | chr16 | CLEC18A | 74600232  | 43 |
| CHB | chr16 | CLEC18A | 74650232  | 47 |
| CHB | chr16 | CLEC18A | 74700232  | 45 |
| CHB | chr16 | CLEC18A | 74750232  | 25 |
| CHB | chr16 | CLEC18A | 74800232  | 0  |
| CHB | chr16 | CLEC18A | 74850232  | 0  |
| CHB | chr16 | CLEC18A | 74900232  | 0  |
| CHB | chr7  | CSH     | 118813708 | 0  |
| CHB | chr7  | CSH     | 118863708 | 0  |
| CHB | chr7  | CSH     | 118913708 | 0  |
| CHB | chr7  | CSH     | 118963708 | 0  |
| CHB | chr7  | CSH     | 119013708 | 0  |
| CHB | chr7  | CSH     | 119063708 | 0  |
| CHB | chr7  | CSH     | 119113708 | 0  |
| CHB | chr7  | CSH     | 119163708 | 0  |
| CHB | chr7  | CSH     | 119213708 | 0  |
| CHB | chr7  | CSH     | 119263708 | 0  |
| CHB | chr7  | CSH     | 119313708 | 0  |
| CHB | chr7  | CSH     | 119363708 | 0  |
| CHB | chr7  | CSH     | 119413708 | 0  |
| CHB | chr7  | CSH     | 119463708 | 0  |
| CHB | chr7  | CSH     | 119513708 | 0  |
| CHB | chr7  | CSH     | 119563708 | 0  |
| CHB | chr7  | CSH     | 119613708 | 0  |



## 3\_Introgression\_data

|     |      |     |           |   |
|-----|------|-----|-----------|---|
| CHB | chr7 | CSH | 119663708 | 0 |
| CHB | chr7 | CSH | 119713708 | 0 |
| CHB | chr7 | CSH | 119763708 | 0 |
| CHB | chr7 | CSH | 119813708 | 0 |
| CHB | chr7 | CSH | 119863708 | 0 |
| CHB | chr7 | CSH | 119913708 | 0 |
| CHB | chr7 | CSH | 119963708 | 0 |
| CHB | chr7 | CSH | 120013708 | 0 |
| CHB | chr7 | CSH | 120063708 | 0 |
| CHB | chr7 | CSH | 120113708 | 0 |
| CHB | chr7 | CSH | 120163708 | 0 |
| CHB | chr7 | CSH | 120213708 | 0 |
| CHB | chr7 | CSH | 120263708 | 0 |
| CHB | chr7 | CSH | 120313708 | 0 |
| CHB | chr7 | CSH | 120363708 | 0 |
| CHB | chr7 | CSH | 120413708 | 0 |
| CHB | chr7 | CSH | 120463708 | 0 |
| CHB | chr7 | CSH | 120513708 | 0 |
| CHB | chr7 | CSH | 120563708 | 0 |
| CHB | chr7 | CSH | 120613708 | 0 |
| CHB | chr7 | CSH | 120663708 | 0 |
| CHB | chr7 | CSH | 120713708 | 0 |
| CHB | chr7 | CSH | 120763708 | 0 |
| CHB | chr7 | CSH | 120813708 | 0 |
| CHB | chr7 | CSH | 120863708 | 0 |
| CHB | chr7 | CSH | 120913708 | 0 |
| CHB | chr7 | CSH | 120963708 | 0 |
| CHB | chr7 | CSH | 121013708 | 0 |
| CHB | chr7 | CSH | 121063708 | 0 |
| CHB | chr7 | CSH | 121113708 | 0 |
| CHB | chr7 | CSH | 121163708 | 0 |
| CHB | chr7 | CSH | 121213708 | 0 |
| CHB | chr7 | CSH | 121263708 | 0 |
| CHB | chr7 | CSH | 121313708 | 0 |
| CHB | chr7 | CSH | 121363708 | 0 |
| CHB | chr7 | CSH | 121413708 | 0 |
| CHB | chr7 | CSH | 121463708 | 0 |
| CHB | chr7 | CSH | 121513708 | 0 |
| CHB | chr7 | CSH | 121563708 | 0 |
| CHB | chr7 | CSH | 121613708 | 0 |
| CHB | chr7 | CSH | 121663708 | 0 |
| CHB | chr7 | CSH | 121713708 | 0 |
| CHB | chr7 | CSH | 121763708 | 0 |
| CHB | chr7 | CSH | 121813708 | 0 |
| CHB | chr7 | CSH | 121863708 | 0 |
| CHB | chr7 | CSH | 121913708 | 0 |
| CHB | chr7 | CSH | 121963708 | 0 |
| CHB | chr7 | CSH | 122013708 | 0 |
| CHB | chr7 | CSH | 122063708 | 0 |

## 3\_Introgression\_data

|     |      |     |           |   |
|-----|------|-----|-----------|---|
| CHB | chr7 | CSH | 122113708 | 0 |
| CHB | chr7 | CSH | 122163708 | 0 |
| CHB | chr7 | CSH | 122213708 | 0 |
| CHB | chr7 | CSH | 122263708 | 0 |
| CHB | chr7 | CSH | 122313708 | 0 |
| CHB | chr7 | CSH | 122363708 | 0 |
| CHB | chr7 | CSH | 122413708 | 0 |
| CHB | chr7 | CSH | 122463708 | 0 |
| CHB | chr7 | CSH | 122513708 | 0 |
| CHB | chr7 | CSH | 122563708 | 0 |
| CHB | chr7 | CSH | 122613708 | 0 |
| CHB | chr7 | CSH | 122663708 | 0 |
| CHB | chr7 | CSH | 122713708 | 0 |
| CHB | chr7 | CSH | 122763708 | 0 |
| CHB | chr7 | CSH | 122813708 | 0 |
| CHB | chr7 | CSH | 122863708 | 0 |
| CHB | chr7 | CSH | 122913708 | 0 |
| CHB | chr7 | CSH | 122963708 | 0 |
| CHB | chr7 | CSH | 123013708 | 0 |
| CHB | chr7 | CSH | 123063708 | 0 |
| CHB | chr7 | CSH | 123113708 | 0 |
| CHB | chr7 | CSH | 123163708 | 0 |
| CHB | chr7 | CSH | 123213708 | 0 |
| CHB | chr7 | CSH | 123263708 | 0 |
| CHB | chr7 | CSH | 123313708 | 0 |
| CHB | chr7 | CSH | 123363708 | 0 |
| CHB | chr7 | CSH | 123413708 | 0 |
| CHB | chr7 | CSH | 123463708 | 0 |
| CHB | chr7 | CSH | 123513708 | 0 |
| CHB | chr7 | CSH | 123563708 | 0 |
| CHB | chr7 | CSH | 123613708 | 0 |
| CHB | chr7 | CSH | 123663708 | 0 |
| CHB | chr7 | CSH | 123713708 | 0 |
| CHB | chr7 | CSH | 123763708 | 0 |
| CHB | chr7 | CSH | 123813708 | 0 |
| CHB | chr7 | CSH | 123863708 | 0 |
| CHB | chr7 | CSH | 123913708 | 0 |
| CHB | chr7 | CSH | 123963708 | 0 |
| CHB | chr7 | CSH | 124013708 | 0 |
| CHB | chr7 | CSH | 124063708 | 0 |
| CHB | chr7 | CSH | 124113708 | 0 |
| CHB | chr7 | CSH | 124163708 | 0 |
| CHB | chr7 | CSH | 124213708 | 0 |
| CHB | chr7 | CSH | 124263708 | 0 |
| CHB | chr7 | CSH | 124313708 | 0 |
| CHB | chr7 | CSH | 124363708 | 0 |
| CHB | chr7 | CSH | 124413708 | 0 |
| CHB | chr7 | CSH | 124463708 | 0 |
| CHB | chr7 | CSH | 124513708 | 0 |

### 3\_Introgression\_data

|     |      |     |           |     |
|-----|------|-----|-----------|-----|
| CHB | chr7 | CSH | 124563708 | 0   |
| CHB | chr7 | CSH | 124613708 | 0   |
| CHB | chr7 | CSH | 124663708 | 0   |
| CHB | chr7 | CSH | 124713708 | 0   |
| CHB | chr7 | CSH | 124763708 | 0   |
| CHB | chr7 | CSH | 124813708 | 0   |
| CHB | chr7 | CSH | 124863708 | 0   |
| CHB | chr7 | CSH | 124913708 | 0   |
| CHB | chr7 | CSH | 124963708 | 7   |
| CHB | chr7 | CSH | 125013708 | 18  |
| CHB | chr7 | CSH | 125063708 | 36  |
| CHB | chr7 | CSH | 125113708 | 59  |
| CHB | chr7 | CSH | 125163708 | 64  |
| CHB | chr7 | CSH | 125213708 | 103 |
| CHB | chr7 | CSH | 125263708 | 98  |
| CHB | chr7 | CSH | 125313708 | 46  |
| CHB | chr7 | CSH | 125363708 | 35  |
| CHB | chr7 | CSH | 125413708 | 14  |
| CHB | chr7 | CSH | 125463708 | 0   |
| CHB | chr7 | CSH | 125513708 | 0   |
| CHB | chr7 | CSH | 125563708 | 20  |
| CHB | chr7 | CSH | 125613708 | 37  |
| CHB | chr7 | CSH | 125663708 | 31  |
| CHB | chr7 | CSH | 125713708 | 27  |
| CHB | chr7 | CSH | 125763708 | 32  |
| CHB | chr7 | CSH | 125813708 | 40  |
| CHB | chr7 | CSH | 125863708 | 34  |
| CHB | chr7 | CSH | 125913708 | 23  |
| CHB | chr7 | CSH | 125963708 | 22  |
| CHB | chr7 | CSH | 126013708 | 31  |
| CHB | chr7 | CSH | 126063708 | 24  |
| CHB | chr7 | CSH | 126113708 | 5   |
| CHB | chr7 | CSH | 126163708 | 0   |
| CHB | chr7 | CSH | 126213708 | 0   |
| CHB | chr7 | CSH | 126263708 | 0   |
| CHB | chr7 | CSH | 126313708 | 0   |
| CHB | chr7 | CSH | 126363708 | 0   |
| CHB | chr7 | CSH | 126413708 | 0   |
| CHB | chr7 | CSH | 126463708 | 0   |
| CHB | chr7 | CSH | 126513708 | 0   |
| CHB | chr7 | CSH | 126563708 | 0   |
| CHB | chr7 | CSH | 126613708 | 0   |
| CHB | chr7 | CSH | 126663708 | 0   |
| CHB | chr7 | CSH | 126713708 | 0   |
| CHB | chr7 | CSH | 126763708 | 0   |
| CHB | chr7 | CSH | 126813708 | 0   |
| CHB | chr7 | CSH | 126863708 | 0   |
| CHB | chr7 | CSH | 126913708 | 0   |
| CHB | chr7 | CSH | 126963708 | 0   |

## 3\_Introgression\_data

|     |       |     |           |   |
|-----|-------|-----|-----------|---|
| CHB | chr7  | CSH | 127013708 | 0 |
| CHB | chr7  | CSH | 127063708 | 0 |
| CHB | chr7  | CSH | 127113708 | 0 |
| CHB | chr7  | CSH | 127163708 | 0 |
| CHB | chr7  | CSH | 127213708 | 0 |
| CHB | chr7  | CSH | 127263708 | 0 |
| CHB | chr7  | CSH | 127313708 | 0 |
| CHB | chr7  | CSH | 127363708 | 0 |
| CHB | chr7  | CSH | 127413708 | 0 |
| CHB | chr7  | CSH | 127463708 | 0 |
| CHB | chr7  | CSH | 127513708 | 0 |
| CHB | chr7  | CSH | 127563708 | 0 |
| CHB | chr7  | CSH | 127613708 | 0 |
| CHB | chr7  | CSH | 127663708 | 0 |
| CHB | chr7  | CSH | 127713708 | 0 |
| CHB | chr7  | CSH | 127763708 | 0 |
| CHB | chr7  | CSH | 127813708 | 0 |
| CHB | chr7  | CSH | 127863708 | 0 |
| CHB | chr7  | CSH | 127913708 | 0 |
| CHB | chr7  | CSH | 127963708 | 0 |
| CHB | chr7  | CSH | 128013708 | 0 |
| CHB | chr7  | CSH | 128063708 | 0 |
| CHB | chr7  | CSH | 128113708 | 0 |
| CHB | chr7  | CSH | 128163708 | 0 |
| CHB | chr7  | CSH | 128213708 | 0 |
| CHB | chr7  | CSH | 128263708 | 0 |
| CHB | chr7  | CSH | 128313708 | 0 |
| CHB | chr7  | CSH | 128363708 | 0 |
| CHB | chr7  | CSH | 128413708 | 0 |
| CHB | chr7  | CSH | 128463708 | 0 |
| CHB | chr7  | CSH | 128513708 | 0 |
| CHB | chr7  | CSH | 128563708 | 0 |
| CHB | chr7  | CSH | 128613708 | 0 |
| CHB | chr7  | CSH | 128663708 | 0 |
| CHB | chr7  | CSH | 128713708 | 0 |
| CHB | chr7  | CSH | 128763708 | 0 |
| CHB | chr7  | CSH | 128813708 | 0 |
| CHB | chr16 | CSH | 76131945  | 0 |
| CHB | chr16 | CSH | 76181945  | 0 |
| CHB | chr16 | CSH | 76231945  | 0 |
| CHB | chr16 | CSH | 76281945  | 0 |
| CHB | chr16 | CSH | 76331945  | 0 |
| CHB | chr16 | CSH | 76381945  | 0 |
| CHB | chr16 | CSH | 76431945  | 0 |
| CHB | chr16 | CSH | 76481945  | 0 |
| CHB | chr16 | CSH | 76531945  | 0 |
| CHB | chr16 | CSH | 76581945  | 0 |
| CHB | chr16 | CSH | 76631945  | 0 |
| CHB | chr16 | CSH | 76681945  | 0 |

## 3\_Introgression\_data

|     |       |     |          |     |
|-----|-------|-----|----------|-----|
| CHB | chr16 | CSH | 76731945 | 9   |
| CHB | chr16 | CSH | 76781945 | 20  |
| CHB | chr16 | CSH | 76831945 | 43  |
| CHB | chr16 | CSH | 76881945 | 40  |
| CHB | chr16 | CSH | 76931945 | 26  |
| CHB | chr16 | CSH | 76981945 | 37  |
| CHB | chr16 | CSH | 77031945 | 29  |
| CHB | chr16 | CSH | 77081945 | 21  |
| CHB | chr16 | CSH | 77131945 | 44  |
| CHB | chr16 | CSH | 77181945 | 50  |
| CHB | chr16 | CSH | 77231945 | 24  |
| CHB | chr16 | CSH | 77281945 | 53  |
| CHB | chr16 | CSH | 77331945 | 94  |
| CHB | chr16 | CSH | 77381945 | 81  |
| CHB | chr16 | CSH | 77431945 | 50  |
| CHB | chr16 | CSH | 77481945 | 30  |
| CHB | chr16 | CSH | 77531945 | 42  |
| CHB | chr16 | CSH | 77581945 | 55  |
| CHB | chr16 | CSH | 77631945 | 43  |
| CHB | chr16 | CSH | 77681945 | 33  |
| CHB | chr16 | CSH | 77731945 | 26  |
| CHB | chr16 | CSH | 77781945 | 24  |
| CHB | chr16 | CSH | 77831945 | 33  |
| CHB | chr16 | CSH | 77881945 | 35  |
| CHB | chr16 | CSH | 77931945 | 33  |
| CHB | chr16 | CSH | 77981945 | 36  |
| CHB | chr16 | CSH | 78031945 | 41  |
| CHB | chr16 | CSH | 78081945 | 100 |
| CHB | chr16 | CSH | 78131945 | 106 |
| CHB | chr16 | CSH | 78181945 | 68  |
| CHB | chr16 | CSH | 78231945 | 65  |
| CHB | chr16 | CSH | 78281945 | 36  |
| CHB | chr16 | CSH | 78331945 | 36  |
| CHB | chr16 | CSH | 78381945 | 96  |
| CHB | chr16 | CSH | 78431945 | 91  |
| CHB | chr16 | CSH | 78481945 | 24  |
| CHB | chr16 | CSH | 78531945 | 21  |
| CHB | chr16 | CSH | 78581945 | 22  |
| CHB | chr16 | CSH | 78631945 | 20  |
| CHB | chr16 | CSH | 78681945 | 100 |
| CHB | chr16 | CSH | 78731945 | 121 |
| CHB | chr16 | CSH | 78781945 | 37  |
| CHB | chr16 | CSH | 78831945 | 1   |
| CHB | chr16 | CSH | 78881945 | 0   |
| CHB | chr16 | CSH | 78931945 | 0   |
| CHB | chr16 | CSH | 78981945 | 0   |
| CHB | chr16 | CSH | 79031945 | 0   |
| CHB | chr16 | CSH | 79081945 | 0   |
| CHB | chr16 | CSH | 79131945 | 0   |

## 3\_Introgression\_data

|     |       |     |          |    |
|-----|-------|-----|----------|----|
| CHB | chr16 | CSH | 79181945 | 9  |
| CHB | chr16 | CSH | 79231945 | 81 |
| CHB | chr16 | CSH | 79281945 | 93 |
| CHB | chr16 | CSH | 79331945 | 21 |
| CHB | chr16 | CSH | 79381945 | 0  |
| CHB | chr16 | CSH | 79431945 | 0  |
| CHB | chr16 | CSH | 79481945 | 0  |
| CHB | chr16 | CSH | 79531945 | 0  |
| CHB | chr16 | CSH | 79581945 | 0  |
| CHB | chr16 | CSH | 79631945 | 0  |
| CHB | chr16 | CSH | 79681945 | 0  |
| CHB | chr16 | CSH | 79731945 | 0  |
| CHB | chr16 | CSH | 79781945 | 0  |
| CHB | chr16 | CSH | 79831945 | 0  |
| CHB | chr16 | CSH | 79881945 | 0  |
| CHB | chr16 | CSH | 79931945 | 0  |
| CHB | chr16 | CSH | 79981945 | 0  |
| CHB | chr16 | CSH | 80031945 | 0  |
| CHB | chr16 | CSH | 80081945 | 0  |
| CHB | chr16 | CSH | 80131945 | 0  |
| CHB | chr16 | CSH | 80181945 | 0  |
| CHB | chr16 | CSH | 80231945 | 0  |
| CHB | chr16 | CSH | 80281945 | 0  |
| CHB | chr16 | CSH | 80331945 | 0  |
| CHB | chr16 | CSH | 80381945 | 0  |
| CHB | chr16 | CSH | 80431945 | 0  |
| CHB | chr16 | CSH | 80481945 | 0  |
| CHB | chr16 | CSH | 80531945 | 0  |
| CHB | chr16 | CSH | 80581945 | 0  |
| CHB | chr16 | CSH | 80631945 | 0  |
| CHB | chr16 | CSH | 80681945 | 0  |
| CHB | chr16 | CSH | 80731945 | 0  |
| CHB | chr16 | CSH | 80781945 | 0  |
| CHB | chr16 | CSH | 80831945 | 0  |
| CHB | chr16 | CSH | 80881945 | 0  |
| CHB | chr16 | CSH | 80931945 | 0  |
| CHB | chr16 | CSH | 80981945 | 0  |
| CHB | chr16 | CSH | 81031945 | 0  |
| CHB | chr16 | CSH | 81081945 | 0  |
| CHB | chr16 | CSH | 81131945 | 0  |
| CHB | chr16 | CSH | 81181945 | 0  |
| CHB | chr16 | CSH | 81231945 | 0  |
| CHB | chr16 | CSH | 81281945 | 0  |
| CHB | chr16 | CSH | 81331945 | 0  |
| CHB | chr16 | CSH | 81381945 | 0  |
| CHB | chr16 | CSH | 81431945 | 0  |
| CHB | chr16 | CSH | 81481945 | 0  |
| CHB | chr16 | CSH | 81531945 | 0  |
| CHB | chr16 | CSH | 81581945 | 0  |

3\_Introgression\_data

|     |       |     |          |    |
|-----|-------|-----|----------|----|
| CHB | chr16 | CSH | 81631945 | 0  |
| CHB | chr16 | CSH | 81681945 | 0  |
| CHB | chr16 | CSH | 81731945 | 0  |
| CHB | chr16 | CSH | 81781945 | 0  |
| CHB | chr16 | CSH | 81831945 | 0  |
| CHB | chr16 | CSH | 81881945 | 0  |
| CHB | chr16 | CSH | 81931945 | 0  |
| CHB | chr16 | CSH | 81981945 | 0  |
| CHB | chr16 | CSH | 82031945 | 0  |
| CHB | chr16 | CSH | 82081945 | 0  |
| CHB | chr16 | CSH | 82131945 | 0  |
| CHB | chr16 | CSH | 82181945 | 0  |
| CHB | chr16 | CSH | 82231945 | 0  |
| CHB | chr16 | CSH | 82281945 | 0  |
| CHB | chr16 | CSH | 82331945 | 0  |
| CHB | chr16 | CSH | 82381945 | 0  |
| CHB | chr16 | CSH | 82431945 | 0  |
| CHB | chr16 | CSH | 82481945 | 0  |
| CHB | chr16 | CSH | 82531945 | 0  |
| CHB | chr16 | CSH | 82581945 | 0  |
| CHB | chr16 | CSH | 82631945 | 0  |
| CHB | chr16 | CSH | 82681945 | 0  |
| CHB | chr16 | CSH | 82731945 | 0  |
| CHB | chr16 | CSH | 82781945 | 0  |
| CHB | chr16 | CSH | 82831945 | 0  |
| CHB | chr16 | CSH | 82881945 | 0  |
| CHB | chr16 | CSH | 82931945 | 0  |
| CHB | chr16 | CSH | 82981945 | 0  |
| CHB | chr16 | CSH | 83031945 | 0  |
| CHB | chr16 | CSH | 83081945 | 0  |
| CHB | chr16 | CSH | 83131945 | 0  |
| CHB | chr16 | CSH | 83181945 | 0  |
| CHB | chr16 | CSH | 83231945 | 0  |
| CHB | chr16 | CSH | 83281945 | 0  |
| CHB | chr16 | CSH | 83331945 | 0  |
| CHB | chr16 | CSH | 83381945 | 0  |
| CHB | chr16 | CSH | 83431945 | 0  |
| CHB | chr16 | CSH | 83481945 | 0  |
| CHB | chr16 | CSH | 83531945 | 0  |
| CHB | chr16 | CSH | 83581945 | 0  |
| CHB | chr16 | CSH | 83631945 | 7  |
| CHB | chr16 | CSH | 83681945 | 42 |
| CHB | chr16 | CSH | 83731945 | 76 |
| CHB | chr16 | CSH | 83781945 | 41 |
| CHB | chr16 | CSH | 83831945 | 0  |
| CHB | chr16 | CSH | 83881945 | 0  |
| CHB | chr16 | CSH | 83931945 | 0  |
| CHB | chr16 | CSH | 83981945 | 0  |
| CHB | chr16 | CSH | 84031945 | 0  |

## 3\_Introgression\_data

|     |       |     |          |    |
|-----|-------|-----|----------|----|
| CHB | chr16 | CSH | 84081945 | 0  |
| CHB | chr16 | CSH | 84131945 | 0  |
| CHB | chr16 | CSH | 84181945 | 0  |
| CHB | chr16 | CSH | 84231945 | 0  |
| CHB | chr16 | CSH | 84281945 | 0  |
| CHB | chr16 | CSH | 84331945 | 0  |
| CHB | chr16 | CSH | 84381945 | 0  |
| CHB | chr16 | CSH | 84431945 | 0  |
| CHB | chr16 | CSH | 84481945 | 0  |
| CHB | chr16 | CSH | 84531945 | 0  |
| CHB | chr16 | CSH | 84581945 | 0  |
| CHB | chr16 | CSH | 84631945 | 0  |
| CHB | chr16 | CSH | 84681945 | 0  |
| CHB | chr16 | CSH | 84731945 | 0  |
| CHB | chr16 | CSH | 84781945 | 0  |
| CHB | chr16 | CSH | 84831945 | 0  |
| CHB | chr16 | CSH | 84881945 | 0  |
| CHB | chr16 | CSH | 84931945 | 0  |
| CHB | chr16 | CSH | 84981945 | 0  |
| CHB | chr16 | CSH | 85031945 | 0  |
| CHB | chr16 | CSH | 85081945 | 0  |
| CHB | chr16 | CSH | 85131945 | 0  |
| CHB | chr16 | CSH | 85181945 | 0  |
| CHB | chr16 | CSH | 85231945 | 0  |
| CHB | chr16 | CSH | 85281945 | 0  |
| CHB | chr16 | CSH | 85331945 | 0  |
| CHB | chr16 | CSH | 85381945 | 0  |
| CHB | chr16 | CSH | 85431945 | 0  |
| CHB | chr16 | CSH | 85481945 | 0  |
| CHB | chr16 | CSH | 85531945 | 0  |
| CHB | chr16 | CSH | 85581945 | 0  |
| CHB | chr16 | CSH | 85631945 | 0  |
| CHB | chr16 | CSH | 85681945 | 0  |
| CHB | chr16 | CSH | 85731945 | 0  |
| CHB | chr16 | CSH | 85781945 | 0  |
| CHB | chr16 | CSH | 85831945 | 0  |
| CHB | chr16 | CSH | 85881945 | 0  |
| CHB | chr16 | CSH | 85931945 | 0  |
| CHB | chr16 | CSH | 85981945 | 0  |
| CHB | chr16 | CSH | 86031945 | 0  |
| CHB | chr17 | CSH | 13377873 | 45 |
| CHB | chr17 | CSH | 13427873 | 50 |
| CHB | chr17 | CSH | 13477873 | 41 |
| CHB | chr17 | CSH | 13527873 | 40 |
| CHB | chr17 | CSH | 13577873 | 34 |
| CHB | chr17 | CSH | 13627873 | 22 |
| CHB | chr17 | CSH | 13677873 | 24 |
| CHB | chr17 | CSH | 13727873 | 64 |
| CHB | chr17 | CSH | 13777873 | 79 |



## 3\_Introgression\_data

|     |       |     |          |    |
|-----|-------|-----|----------|----|
| CHB | chr17 | CSH | 13827873 | 50 |
| CHB | chr17 | CSH | 13877873 | 38 |
| CHB | chr17 | CSH | 13927873 | 24 |
| CHB | chr17 | CSH | 13977873 | 20 |
| CHB | chr17 | CSH | 14027873 | 20 |
| CHB | chr17 | CSH | 14077873 | 38 |
| CHB | chr17 | CSH | 14127873 | 31 |
| CHB | chr17 | CSH | 14177873 | 3  |
| CHB | chr17 | CSH | 14227873 | 0  |
| CHB | chr17 | CSH | 14277873 | 0  |
| CHB | chr17 | CSH | 14327873 | 0  |
| CHB | chr17 | CSH | 14377873 | 0  |
| CHB | chr17 | CSH | 14427873 | 0  |
| CHB | chr17 | CSH | 14477873 | 0  |
| CHB | chr17 | CSH | 14527873 | 0  |
| CHB | chr17 | CSH | 14577873 | 0  |
| CHB | chr17 | CSH | 14627873 | 0  |
| CHB | chr17 | CSH | 14677873 | 0  |
| CHB | chr17 | CSH | 14727873 | 0  |
| CHB | chr17 | CSH | 14777873 | 0  |
| CHB | chr17 | CSH | 14827873 | 0  |
| CHB | chr17 | CSH | 14877873 | 0  |
| CHB | chr17 | CSH | 14927873 | 21 |
| CHB | chr17 | CSH | 14977873 | 75 |
| CHB | chr17 | CSH | 15027873 | 67 |
| CHB | chr17 | CSH | 15077873 | 24 |
| CHB | chr17 | CSH | 15127873 | 27 |
| CHB | chr17 | CSH | 15177873 | 26 |
| CHB | chr17 | CSH | 15227873 | 10 |
| CHB | chr17 | CSH | 15277873 | 12 |
| CHB | chr17 | CSH | 15327873 | 38 |
| CHB | chr17 | CSH | 15377873 | 39 |
| CHB | chr17 | CSH | 15427873 | 24 |
| CHB | chr17 | CSH | 15477873 | 17 |
| CHB | chr17 | CSH | 15527873 | 6  |
| CHB | chr17 | CSH | 15577873 | 0  |
| CHB | chr17 | CSH | 15627873 | 0  |
| CHB | chr17 | CSH | 15677873 | 0  |
| CHB | chr17 | CSH | 15727873 | 0  |
| CHB | chr17 | CSH | 15777873 | 0  |
| CHB | chr17 | CSH | 15827873 | 0  |
| CHB | chr17 | CSH | 15877873 | 0  |
| CHB | chr17 | CSH | 15927873 | 0  |
| CHB | chr17 | CSH | 15977873 | 0  |
| CHB | chr17 | CSH | 16027873 | 0  |
| CHB | chr17 | CSH | 16077873 | 0  |
| CHB | chr17 | CSH | 16127873 | 0  |
| CHB | chr17 | CSH | 16177873 | 0  |
| CHB | chr17 | CSH | 16227873 | 0  |

## 3\_Introgression\_data

|     |       |     |          |   |
|-----|-------|-----|----------|---|
| CHB | chr17 | CSH | 16277873 | 0 |
| CHB | chr17 | CSH | 16327873 | 0 |
| CHB | chr17 | CSH | 16377873 | 0 |
| CHB | chr17 | CSH | 16427873 | 0 |
| CHB | chr17 | CSH | 16477873 | 0 |
| CHB | chr17 | CSH | 16527873 | 0 |
| CHB | chr17 | CSH | 16577873 | 0 |
| CHB | chr17 | CSH | 16627873 | 0 |
| CHB | chr17 | CSH | 16677873 | 0 |
| CHB | chr17 | CSH | 16727873 | 0 |
| CHB | chr17 | CSH | 16777873 | 0 |
| CHB | chr17 | CSH | 16827873 | 0 |
| CHB | chr17 | CSH | 16877873 | 0 |
| CHB | chr17 | CSH | 16927873 | 0 |
| CHB | chr17 | CSH | 16977873 | 0 |
| CHB | chr17 | CSH | 17027873 | 0 |
| CHB | chr17 | CSH | 17077873 | 0 |
| CHB | chr17 | CSH | 17127873 | 0 |
| CHB | chr17 | CSH | 17177873 | 0 |
| CHB | chr17 | CSH | 17227873 | 0 |
| CHB | chr17 | CSH | 17277873 | 0 |
| CHB | chr17 | CSH | 17327873 | 0 |
| CHB | chr17 | CSH | 17377873 | 0 |
| CHB | chr17 | CSH | 17427873 | 0 |
| CHB | chr17 | CSH | 17477873 | 0 |
| CHB | chr17 | CSH | 17527873 | 0 |
| CHB | chr17 | CSH | 17577873 | 0 |
| CHB | chr17 | CSH | 17627873 | 0 |
| CHB | chr17 | CSH | 17677873 | 0 |
| CHB | chr17 | CSH | 17727873 | 0 |
| CHB | chr17 | CSH | 17777873 | 0 |
| CHB | chr17 | CSH | 17827873 | 0 |
| CHB | chr17 | CSH | 17877873 | 0 |
| CHB | chr17 | CSH | 17927873 | 0 |
| CHB | chr17 | CSH | 17977873 | 0 |
| CHB | chr17 | CSH | 18027873 | 0 |
| CHB | chr17 | CSH | 18077873 | 0 |
| CHB | chr17 | CSH | 18127873 | 0 |
| CHB | chr17 | CSH | 18177873 | 0 |
| CHB | chr17 | CSH | 18227873 | 0 |
| CHB | chr17 | CSH | 18277873 | 0 |
| CHB | chr17 | CSH | 18327873 | 0 |
| CHB | chr17 | CSH | 18377873 | 0 |
| CHB | chr17 | CSH | 18427873 | 0 |
| CHB | chr17 | CSH | 18477873 | 0 |
| CHB | chr17 | CSH | 18527873 | 0 |
| CHB | chr17 | CSH | 18577873 | 0 |
| CHB | chr17 | CSH | 18627873 | 0 |
| CHB | chr17 | CSH | 18677873 | 0 |

## 3\_Introgression\_data

|     |       |     |          |     |
|-----|-------|-----|----------|-----|
| CHB | chr17 | CSH | 18727873 | 0   |
| CHB | chr17 | CSH | 18777873 | 0   |
| CHB | chr17 | CSH | 18827873 | 0   |
| CHB | chr17 | CSH | 18877873 | 0   |
| CHB | chr17 | CSH | 18927873 | 0   |
| CHB | chr17 | CSH | 18977873 | 0   |
| CHB | chr17 | CSH | 19027873 | 0   |
| CHB | chr17 | CSH | 19077873 | 0   |
| CHB | chr17 | CSH | 19127873 | 25  |
| CHB | chr17 | CSH | 19177873 | 51  |
| CHB | chr17 | CSH | 19227873 | 50  |
| CHB | chr17 | CSH | 19277873 | 68  |
| CHB | chr17 | CSH | 19327873 | 58  |
| CHB | chr17 | CSH | 19377873 | 39  |
| CHB | chr17 | CSH | 19427873 | 49  |
| CHB | chr17 | CSH | 19477873 | 44  |
| CHB | chr17 | CSH | 19527873 | 42  |
| CHB | chr17 | CSH | 19577873 | 45  |
| CHB | chr17 | CSH | 19627873 | 61  |
| CHB | chr17 | CSH | 19677873 | 45  |
| CHB | chr17 | CSH | 19727873 | 31  |
| CHB | chr17 | CSH | 19777873 | 69  |
| CHB | chr17 | CSH | 19827873 | 113 |
| CHB | chr17 | CSH | 19877873 | 71  |
| CHB | chr17 | CSH | 19927873 | 3   |
| CHB | chr17 | CSH | 19977873 | 0   |
| CHB | chr17 | CSH | 20027873 | 0   |
| CHB | chr17 | CSH | 20077873 | 0   |
| CHB | chr17 | CSH | 20127873 | 0   |
| CHB | chr17 | CSH | 20177873 | 0   |
| CHB | chr17 | CSH | 20227873 | 0   |
| CHB | chr17 | CSH | 20277873 | 0   |
| CHB | chr17 | CSH | 20327873 | 0   |
| CHB | chr17 | CSH | 20377873 | 0   |
| CHB | chr17 | CSH | 20427873 | 0   |
| CHB | chr17 | CSH | 20477873 | 0   |
| CHB | chr17 | CSH | 20527873 | 0   |
| CHB | chr17 | CSH | 20577873 | 0   |
| CHB | chr17 | CSH | 20627873 | 0   |
| CHB | chr17 | CSH | 20677873 | 0   |
| CHB | chr17 | CSH | 20727873 | 0   |
| CHB | chr17 | CSH | 20777873 | 0   |
| CHB | chr17 | CSH | 20827873 | 0   |
| CHB | chr17 | CSH | 20877873 | 0   |
| CHB | chr17 | CSH | 20927873 | 0   |
| CHB | chr17 | CSH | 20977873 | 0   |
| CHB | chr17 | CSH | 21027873 | 0   |
| CHB | chr17 | CSH | 21077873 | 0   |
| CHB | chr17 | CSH | 21127873 | 0   |

## 3\_Introgression\_data

|     |       |     |          |   |
|-----|-------|-----|----------|---|
| CHB | chr17 | CSH | 21177873 | 0 |
| CHB | chr17 | CSH | 21227873 | 0 |
| CHB | chr17 | CSH | 21277873 | 0 |
| CHB | chr17 | CSH | 21327873 | 0 |
| CHB | chr17 | CSH | 21377873 | 0 |
| CHB | chr17 | CSH | 21427873 | 0 |
| CHB | chr17 | CSH | 21477873 | 0 |
| CHB | chr17 | CSH | 21527873 | 0 |
| CHB | chr17 | CSH | 21577873 | 0 |
| CHB | chr17 | CSH | 21627873 | 0 |
| CHB | chr17 | CSH | 21677873 | 0 |
| CHB | chr17 | CSH | 21727873 | 0 |
| CHB | chr17 | CSH | 21777873 | 0 |
| CHB | chr17 | CSH | 21827873 | 0 |
| CHB | chr17 | CSH | 21877873 | 0 |
| CHB | chr17 | CSH | 21927873 | 0 |
| CHB | chr17 | CSH | 21977873 | 0 |
| CHB | chr17 | CSH | 22027873 | 0 |
| CHB | chr17 | CSH | 22077873 | 0 |
| CHB | chr17 | CSH | 22127873 | 0 |
| CHB | chr17 | CSH | 22177873 | 0 |
| CHB | chr17 | CSH | 22227873 | 0 |
| CHB | chr17 | CSH | 22277873 | 0 |
| CHB | chr17 | CSH | 22327873 | 0 |
| CHB | chr17 | CSH | 22377873 | 0 |
| CHB | chr17 | CSH | 22427873 | 0 |
| CHB | chr17 | CSH | 22477873 | 0 |
| CHB | chr17 | CSH | 22527873 | 0 |
| CHB | chr17 | CSH | 22577873 | 0 |
| CHB | chr17 | CSH | 22627873 | 0 |
| CHB | chr17 | CSH | 22677873 | 0 |
| CHB | chr17 | CSH | 22727873 | 0 |
| CHB | chr17 | CSH | 22777873 | 0 |
| CHB | chr17 | CSH | 22827873 | 0 |
| CHB | chr17 | CSH | 22877873 | 0 |
| CHB | chr17 | CSH | 22927873 | 0 |
| CHB | chr17 | CSH | 22977873 | 0 |
| CHB | chr17 | CSH | 23027873 | 0 |
| CHB | chr17 | CSH | 23077873 | 0 |
| CHB | chr17 | CSH | 23127873 | 0 |
| CHB | chr17 | CSH | 23177873 | 0 |
| CHB | chr17 | CSH | 23227873 | 0 |
| CHB | chr17 | CSH | 23277873 | 0 |
| CHB | chr17 | CSH | 58922012 | 0 |
| CHB | chr17 | CSH | 58972012 | 0 |
| CHB | chr17 | CSH | 59022012 | 0 |
| CHB | chr17 | CSH | 59072012 | 0 |
| CHB | chr17 | CSH | 59122012 | 0 |
| CHB | chr17 | CSH | 59172012 | 0 |

## 3\_Introgression\_data

|     |       |     |          |   |
|-----|-------|-----|----------|---|
| CHB | chr17 | CSH | 59222012 | 0 |
| CHB | chr17 | CSH | 59272012 | 0 |
| CHB | chr17 | CSH | 59322012 | 0 |
| CHB | chr17 | CSH | 59372012 | 0 |
| CHB | chr17 | CSH | 59422012 | 0 |
| CHB | chr17 | CSH | 59472012 | 0 |
| CHB | chr17 | CSH | 59522012 | 0 |
| CHB | chr17 | CSH | 59572012 | 0 |
| CHB | chr17 | CSH | 59622012 | 0 |
| CHB | chr17 | CSH | 59672012 | 0 |
| CHB | chr17 | CSH | 59722012 | 0 |
| CHB | chr17 | CSH | 59772012 | 0 |
| CHB | chr17 | CSH | 59822012 | 0 |
| CHB | chr17 | CSH | 59872012 | 0 |
| CHB | chr17 | CSH | 59922012 | 0 |
| CHB | chr17 | CSH | 59972012 | 0 |
| CHB | chr17 | CSH | 60022012 | 0 |
| CHB | chr17 | CSH | 60072012 | 0 |
| CHB | chr17 | CSH | 60122012 | 0 |
| CHB | chr17 | CSH | 60172012 | 0 |
| CHB | chr17 | CSH | 60222012 | 0 |
| CHB | chr17 | CSH | 60272012 | 0 |
| CHB | chr17 | CSH | 60322012 | 0 |
| CHB | chr17 | CSH | 60372012 | 0 |
| CHB | chr17 | CSH | 60422012 | 0 |
| CHB | chr17 | CSH | 60472012 | 0 |
| CHB | chr17 | CSH | 60522012 | 0 |
| CHB | chr17 | CSH | 60572012 | 0 |
| CHB | chr17 | CSH | 60622012 | 0 |
| CHB | chr17 | CSH | 60672012 | 0 |
| CHB | chr17 | CSH | 60722012 | 0 |
| CHB | chr17 | CSH | 60772012 | 0 |
| CHB | chr17 | CSH | 60822012 | 0 |
| CHB | chr17 | CSH | 60872012 | 0 |
| CHB | chr17 | CSH | 60922012 | 0 |
| CHB | chr17 | CSH | 60972012 | 0 |
| CHB | chr17 | CSH | 61022012 | 0 |
| CHB | chr17 | CSH | 61072012 | 0 |
| CHB | chr17 | CSH | 61122012 | 0 |
| CHB | chr17 | CSH | 61172012 | 0 |
| CHB | chr17 | CSH | 61222012 | 0 |
| CHB | chr17 | CSH | 61272012 | 0 |
| CHB | chr17 | CSH | 61322012 | 0 |
| CHB | chr17 | CSH | 61372012 | 0 |
| CHB | chr17 | CSH | 61422012 | 0 |
| CHB | chr17 | CSH | 61472012 | 0 |
| CHB | chr17 | CSH | 61522012 | 0 |
| CHB | chr17 | CSH | 61572012 | 0 |
| CHB | chr17 | CSH | 61622012 | 0 |

## 3\_Introgression\_data

|     |       |     |          |   |
|-----|-------|-----|----------|---|
| CHB | chr17 | CSH | 61672012 | 0 |
| CHB | chr17 | CSH | 61722012 | 0 |
| CHB | chr17 | CSH | 61772012 | 0 |
| CHB | chr17 | CSH | 61822012 | 0 |
| CHB | chr17 | CSH | 61872012 | 0 |
| CHB | chr17 | CSH | 61922012 | 0 |
| CHB | chr17 | CSH | 61972012 | 0 |
| CHB | chr17 | CSH | 62022012 | 0 |
| CHB | chr17 | CSH | 62072012 | 0 |
| CHB | chr17 | CSH | 62122012 | 0 |
| CHB | chr17 | CSH | 62172012 | 0 |
| CHB | chr17 | CSH | 62222012 | 0 |
| CHB | chr17 | CSH | 62272012 | 0 |
| CHB | chr17 | CSH | 62322012 | 0 |
| CHB | chr17 | CSH | 62372012 | 0 |
| CHB | chr17 | CSH | 62422012 | 0 |
| CHB | chr17 | CSH | 62472012 | 0 |
| CHB | chr17 | CSH | 62522012 | 0 |
| CHB | chr17 | CSH | 62572012 | 0 |
| CHB | chr17 | CSH | 62622012 | 0 |
| CHB | chr17 | CSH | 62672012 | 0 |
| CHB | chr17 | CSH | 62722012 | 0 |
| CHB | chr17 | CSH | 62772012 | 0 |
| CHB | chr17 | CSH | 62822012 | 0 |
| CHB | chr17 | CSH | 62872012 | 0 |
| CHB | chr17 | CSH | 62922012 | 0 |
| CHB | chr17 | CSH | 62972012 | 0 |
| CHB | chr17 | CSH | 63022012 | 0 |
| CHB | chr17 | CSH | 63072012 | 0 |
| CHB | chr17 | CSH | 63122012 | 0 |
| CHB | chr17 | CSH | 63172012 | 0 |
| CHB | chr17 | CSH | 63222012 | 0 |
| CHB | chr17 | CSH | 63272012 | 0 |
| CHB | chr17 | CSH | 63322012 | 0 |
| CHB | chr17 | CSH | 63372012 | 0 |
| CHB | chr17 | CSH | 63422012 | 0 |
| CHB | chr17 | CSH | 63472012 | 0 |
| CHB | chr17 | CSH | 63522012 | 0 |
| CHB | chr17 | CSH | 63572012 | 0 |
| CHB | chr17 | CSH | 63622012 | 0 |
| CHB | chr17 | CSH | 63672012 | 0 |
| CHB | chr17 | CSH | 63722012 | 0 |
| CHB | chr17 | CSH | 63772012 | 0 |
| CHB | chr17 | CSH | 63822012 | 0 |
| CHB | chr17 | CSH | 63872012 | 0 |
| CHB | chr17 | CSH | 63922012 | 0 |
| CHB | chr17 | CSH | 63972012 | 0 |
| CHB | chr17 | CSH | 64022012 | 0 |
| CHB | chr17 | CSH | 64072012 | 0 |

## 3\_Introgression\_data

|     |       |     |          |   |
|-----|-------|-----|----------|---|
| CHB | chr17 | CSH | 64122012 | 0 |
| CHB | chr17 | CSH | 64172012 | 0 |
| CHB | chr17 | CSH | 64222012 | 0 |
| CHB | chr17 | CSH | 64272012 | 0 |
| CHB | chr17 | CSH | 64322012 | 0 |
| CHB | chr17 | CSH | 64372012 | 0 |
| CHB | chr17 | CSH | 64422012 | 0 |
| CHB | chr17 | CSH | 64472012 | 0 |
| CHB | chr17 | CSH | 64522012 | 0 |
| CHB | chr17 | CSH | 64572012 | 0 |
| CHB | chr17 | CSH | 64622012 | 0 |
| CHB | chr17 | CSH | 64672012 | 0 |
| CHB | chr17 | CSH | 64722012 | 0 |
| CHB | chr17 | CSH | 64772012 | 0 |
| CHB | chr17 | CSH | 64822012 | 0 |
| CHB | chr17 | CSH | 64872012 | 0 |
| CHB | chr17 | CSH | 64922012 | 0 |
| CHB | chr17 | CSH | 64972012 | 0 |
| CHB | chr17 | CSH | 65022012 | 0 |
| CHB | chr17 | CSH | 65072012 | 0 |
| CHB | chr17 | CSH | 65122012 | 0 |
| CHB | chr17 | CSH | 65172012 | 0 |
| CHB | chr17 | CSH | 65222012 | 0 |
| CHB | chr17 | CSH | 65272012 | 0 |
| CHB | chr17 | CSH | 65322012 | 0 |
| CHB | chr17 | CSH | 65372012 | 0 |
| CHB | chr17 | CSH | 65422012 | 0 |
| CHB | chr17 | CSH | 65472012 | 0 |
| CHB | chr17 | CSH | 65522012 | 0 |
| CHB | chr17 | CSH | 65572012 | 0 |
| CHB | chr17 | CSH | 65622012 | 0 |
| CHB | chr17 | CSH | 65672012 | 0 |
| CHB | chr17 | CSH | 65722012 | 0 |
| CHB | chr17 | CSH | 65772012 | 0 |
| CHB | chr17 | CSH | 65822012 | 0 |
| CHB | chr17 | CSH | 65872012 | 0 |
| CHB | chr17 | CSH | 65922012 | 0 |
| CHB | chr17 | CSH | 65972012 | 0 |
| CHB | chr17 | CSH | 66022012 | 0 |
| CHB | chr17 | CSH | 66072012 | 0 |
| CHB | chr17 | CSH | 66122012 | 0 |
| CHB | chr17 | CSH | 66172012 | 0 |
| CHB | chr17 | CSH | 66222012 | 0 |
| CHB | chr17 | CSH | 66272012 | 0 |
| CHB | chr17 | CSH | 66322012 | 0 |
| CHB | chr17 | CSH | 66372012 | 0 |
| CHB | chr17 | CSH | 66422012 | 0 |
| CHB | chr17 | CSH | 66472012 | 0 |
| CHB | chr17 | CSH | 66522012 | 0 |

## 3\_Introgression\_data

|     |       |     |          |   |
|-----|-------|-----|----------|---|
| CHB | chr17 | CSH | 66572012 | 0 |
| CHB | chr17 | CSH | 66622012 | 0 |
| CHB | chr17 | CSH | 66672012 | 0 |
| CHB | chr17 | CSH | 66722012 | 0 |
| CHB | chr17 | CSH | 66772012 | 0 |
| CHB | chr17 | CSH | 66822012 | 0 |
| CHB | chr17 | CSH | 66872012 | 0 |
| CHB | chr17 | CSH | 66922012 | 0 |
| CHB | chr17 | CSH | 66972012 | 0 |
| CHB | chr17 | CSH | 67022012 | 0 |
| CHB | chr17 | CSH | 67072012 | 0 |
| CHB | chr17 | CSH | 67122012 | 0 |
| CHB | chr17 | CSH | 67172012 | 0 |
| CHB | chr17 | CSH | 67222012 | 0 |
| CHB | chr17 | CSH | 67272012 | 0 |
| CHB | chr17 | CSH | 67322012 | 0 |
| CHB | chr17 | CSH | 67372012 | 0 |
| CHB | chr17 | CSH | 67422012 | 0 |
| CHB | chr17 | CSH | 67472012 | 0 |
| CHB | chr17 | CSH | 67522012 | 0 |
| CHB | chr17 | CSH | 67572012 | 0 |
| CHB | chr17 | CSH | 67622012 | 0 |
| CHB | chr17 | CSH | 67672012 | 0 |
| CHB | chr17 | CSH | 67722012 | 0 |
| CHB | chr17 | CSH | 67772012 | 0 |
| CHB | chr17 | CSH | 67822012 | 0 |
| CHB | chr17 | CSH | 67872012 | 0 |
| CHB | chr17 | CSH | 67922012 | 0 |
| CHB | chr17 | CSH | 67972012 | 0 |
| CHB | chr17 | CSH | 68022012 | 0 |
| CHB | chr17 | CSH | 68072012 | 0 |
| CHB | chr17 | CSH | 68122012 | 0 |
| CHB | chr17 | CSH | 68172012 | 0 |
| CHB | chr17 | CSH | 68222012 | 0 |
| CHB | chr17 | CSH | 68272012 | 0 |
| CHB | chr17 | CSH | 68322012 | 0 |
| CHB | chr17 | CSH | 68372012 | 0 |
| CHB | chr17 | CSH | 68422012 | 0 |
| CHB | chr17 | CSH | 68472012 | 0 |
| CHB | chr17 | CSH | 68522012 | 0 |
| CHB | chr17 | CSH | 68572012 | 0 |
| CHB | chr17 | CSH | 68622012 | 0 |
| CHB | chr17 | CSH | 68672012 | 0 |
| CHB | chr17 | CSH | 68722012 | 0 |
| CHB | chr17 | CSH | 68772012 | 0 |
| CHB | chr17 | CSH | 68822012 | 0 |
| CHB | chr19 | CSH | 6485290  | 4 |
| CHB | chr19 | CSH | 6535290  | 0 |
| CHB | chr19 | CSH | 6585290  | 0 |



## 3\_Introgression\_data

|     |       |     |         |    |
|-----|-------|-----|---------|----|
| CHB | chr19 | CSH | 6635290 | 0  |
| CHB | chr19 | CSH | 6685290 | 0  |
| CHB | chr19 | CSH | 6735290 | 0  |
| CHB | chr19 | CSH | 6785290 | 0  |
| CHB | chr19 | CSH | 6835290 | 0  |
| CHB | chr19 | CSH | 6885290 | 0  |
| CHB | chr19 | CSH | 6935290 | 0  |
| CHB | chr19 | CSH | 6985290 | 35 |
| CHB | chr19 | CSH | 7035290 | 36 |
| CHB | chr19 | CSH | 7085290 | 1  |
| CHB | chr19 | CSH | 7135290 | 0  |
| CHB | chr19 | CSH | 7185290 | 0  |
| CHB | chr19 | CSH | 7235290 | 0  |
| CHB | chr19 | CSH | 7285290 | 0  |
| CHB | chr19 | CSH | 7335290 | 0  |
| CHB | chr19 | CSH | 7385290 | 0  |
| CHB | chr19 | CSH | 7435290 | 0  |
| CHB | chr19 | CSH | 7485290 | 0  |
| CHB | chr19 | CSH | 7535290 | 0  |
| CHB | chr19 | CSH | 7585290 | 0  |
| CHB | chr19 | CSH | 7635290 | 0  |
| CHB | chr19 | CSH | 7685290 | 0  |
| CHB | chr19 | CSH | 7735290 | 0  |
| CHB | chr19 | CSH | 7785290 | 0  |
| CHB | chr19 | CSH | 7835290 | 0  |
| CHB | chr19 | CSH | 7885290 | 0  |
| CHB | chr19 | CSH | 7935290 | 0  |
| CHB | chr19 | CSH | 7985290 | 0  |
| CHB | chr19 | CSH | 8035290 | 0  |
| CHB | chr19 | CSH | 8085290 | 0  |
| CHB | chr19 | CSH | 8135290 | 0  |
| CHB | chr19 | CSH | 8185290 | 0  |
| CHB | chr19 | CSH | 8235290 | 0  |
| CHB | chr19 | CSH | 8285290 | 0  |
| CHB | chr19 | CSH | 8335290 | 0  |
| CHB | chr19 | CSH | 8385290 | 0  |
| CHB | chr19 | CSH | 8435290 | 0  |
| CHB | chr19 | CSH | 8485290 | 0  |
| CHB | chr19 | CSH | 8535290 | 0  |
| CHB | chr19 | CSH | 8585290 | 0  |
| CHB | chr19 | CSH | 8635290 | 0  |
| CHB | chr19 | CSH | 8685290 | 0  |
| CHB | chr19 | CSH | 8735290 | 0  |
| CHB | chr19 | CSH | 8785290 | 0  |
| CHB | chr19 | CSH | 8835290 | 0  |
| CHB | chr19 | CSH | 8885290 | 0  |
| CHB | chr19 | CSH | 8935290 | 0  |
| CHB | chr19 | CSH | 8985290 | 0  |
| CHB | chr19 | CSH | 9035290 | 0  |

3\_Introgression\_data

|     |       |     |          |    |
|-----|-------|-----|----------|----|
| CHB | chr19 | CSH | 9085290  | 0  |
| CHB | chr19 | CSH | 9135290  | 0  |
| CHB | chr19 | CSH | 9185290  | 0  |
| CHB | chr19 | CSH | 9235290  | 0  |
| CHB | chr19 | CSH | 9285290  | 0  |
| CHB | chr19 | CSH | 9335290  | 0  |
| CHB | chr19 | CSH | 9385290  | 0  |
| CHB | chr19 | CSH | 9435290  | 0  |
| CHB | chr19 | CSH | 9485290  | 0  |
| CHB | chr19 | CSH | 9535290  | 0  |
| CHB | chr19 | CSH | 9585290  | 0  |
| CHB | chr19 | CSH | 9635290  | 0  |
| CHB | chr19 | CSH | 9685290  | 0  |
| CHB | chr19 | CSH | 9735290  | 0  |
| CHB | chr19 | CSH | 9785290  | 0  |
| CHB | chr19 | CSH | 9835290  | 0  |
| CHB | chr19 | CSH | 9885290  | 0  |
| CHB | chr19 | CSH | 9935290  | 0  |
| CHB | chr19 | CSH | 9985290  | 0  |
| CHB | chr19 | CSH | 10035290 | 0  |
| CHB | chr19 | CSH | 10085290 | 0  |
| CHB | chr19 | CSH | 10135290 | 1  |
| CHB | chr19 | CSH | 10185290 | 42 |
| CHB | chr19 | CSH | 10235290 | 74 |
| CHB | chr19 | CSH | 10285290 | 58 |
| CHB | chr19 | CSH | 10335290 | 40 |
| CHB | chr19 | CSH | 10385290 | 28 |
| CHB | chr19 | CSH | 10435290 | 48 |
| CHB | chr19 | CSH | 10485290 | 58 |
| CHB | chr19 | CSH | 10535290 | 39 |
| CHB | chr19 | CSH | 10585290 | 37 |
| CHB | chr19 | CSH | 10635290 | 21 |
| CHB | chr19 | CSH | 10685290 | 0  |
| CHB | chr19 | CSH | 10735290 | 0  |
| CHB | chr19 | CSH | 10785290 | 0  |
| CHB | chr19 | CSH | 10835290 | 0  |
| CHB | chr19 | CSH | 10885290 | 0  |
| CHB | chr19 | CSH | 10935290 | 0  |
| CHB | chr19 | CSH | 10985290 | 0  |
| CHB | chr19 | CSH | 11035290 | 0  |
| CHB | chr19 | CSH | 11085290 | 0  |
| CHB | chr19 | CSH | 11135290 | 0  |
| CHB | chr19 | CSH | 11185290 | 0  |
| CHB | chr19 | CSH | 11235290 | 0  |
| CHB | chr19 | CSH | 11285290 | 0  |
| CHB | chr19 | CSH | 11335290 | 0  |
| CHB | chr19 | CSH | 11385290 | 0  |
| CHB | chr19 | CSH | 11435290 | 0  |
| CHB | chr19 | CSH | 11485290 | 6  |

## 3\_Introgression\_data

|     |       |     |          |    |
|-----|-------|-----|----------|----|
| CHB | chr19 | CSH | 11535290 | 35 |
| CHB | chr19 | CSH | 11585290 | 29 |
| CHB | chr19 | CSH | 11635290 | 3  |
| CHB | chr19 | CSH | 11685290 | 18 |
| CHB | chr19 | CSH | 11735290 | 30 |
| CHB | chr19 | CSH | 11785290 | 37 |
| CHB | chr19 | CSH | 11835290 | 37 |
| CHB | chr19 | CSH | 11885290 | 24 |
| CHB | chr19 | CSH | 11935290 | 27 |
| CHB | chr19 | CSH | 11985290 | 23 |
| CHB | chr19 | CSH | 12035290 | 5  |
| CHB | chr19 | CSH | 12085290 | 0  |
| CHB | chr19 | CSH | 12135290 | 0  |
| CHB | chr19 | CSH | 12185290 | 0  |
| CHB | chr19 | CSH | 12235290 | 0  |
| CHB | chr19 | CSH | 12285290 | 0  |
| CHB | chr19 | CSH | 12335290 | 0  |
| CHB | chr19 | CSH | 12385290 | 0  |
| CHB | chr19 | CSH | 12435290 | 0  |
| CHB | chr19 | CSH | 12485290 | 0  |
| CHB | chr19 | CSH | 12535290 | 0  |
| CHB | chr19 | CSH | 12585290 | 0  |
| CHB | chr19 | CSH | 12635290 | 0  |
| CHB | chr19 | CSH | 12685290 | 0  |
| CHB | chr19 | CSH | 12735290 | 0  |
| CHB | chr19 | CSH | 12785290 | 0  |
| CHB | chr19 | CSH | 12835290 | 0  |
| CHB | chr19 | CSH | 12885290 | 0  |
| CHB | chr19 | CSH | 12935290 | 0  |
| CHB | chr19 | CSH | 12985290 | 0  |
| CHB | chr19 | CSH | 13035290 | 0  |
| CHB | chr19 | CSH | 13085290 | 0  |
| CHB | chr19 | CSH | 13135290 | 0  |
| CHB | chr19 | CSH | 13185290 | 0  |
| CHB | chr19 | CSH | 13235290 | 0  |
| CHB | chr19 | CSH | 13285290 | 0  |
| CHB | chr19 | CSH | 13335290 | 0  |
| CHB | chr19 | CSH | 13385290 | 0  |
| CHB | chr19 | CSH | 13435290 | 0  |
| CHB | chr19 | CSH | 13485290 | 0  |
| CHB | chr19 | CSH | 13535290 | 0  |
| CHB | chr19 | CSH | 13585290 | 0  |
| CHB | chr19 | CSH | 13635290 | 0  |
| CHB | chr19 | CSH | 13685290 | 0  |
| CHB | chr19 | CSH | 13735290 | 0  |
| CHB | chr19 | CSH | 13785290 | 0  |
| CHB | chr19 | CSH | 13835290 | 0  |
| CHB | chr19 | CSH | 13885290 | 0  |
| CHB | chr19 | CSH | 13935290 | 0  |

## 3\_Introgression\_data

|     |       |     |          |   |
|-----|-------|-----|----------|---|
| CHB | chr19 | CSH | 13985290 | 0 |
| CHB | chr19 | CSH | 14035290 | 0 |
| CHB | chr19 | CSH | 14085290 | 0 |
| CHB | chr19 | CSH | 14135290 | 0 |
| CHB | chr19 | CSH | 14185290 | 0 |
| CHB | chr19 | CSH | 14235290 | 0 |
| CHB | chr19 | CSH | 14285290 | 0 |
| CHB | chr19 | CSH | 14335290 | 0 |
| CHB | chr19 | CSH | 14385290 | 0 |
| CHB | chr19 | CSH | 14435290 | 0 |
| CHB | chr19 | CSH | 14485290 | 0 |
| CHB | chr19 | CSH | 14535290 | 0 |
| CHB | chr19 | CSH | 14585290 | 0 |
| CHB | chr19 | CSH | 14635290 | 0 |
| CHB | chr19 | CSH | 14685290 | 0 |
| CHB | chr19 | CSH | 14735290 | 0 |
| CHB | chr19 | CSH | 14785290 | 0 |
| CHB | chr19 | CSH | 14835290 | 0 |
| CHB | chr19 | CSH | 14885290 | 0 |
| CHB | chr19 | CSH | 14935290 | 0 |
| CHB | chr19 | CSH | 14985290 | 0 |
| CHB | chr19 | CSH | 15035290 | 0 |
| CHB | chr19 | CSH | 15085290 | 0 |
| CHB | chr19 | CSH | 15135290 | 0 |
| CHB | chr19 | CSH | 15185290 | 0 |
| CHB | chr19 | CSH | 15235290 | 0 |
| CHB | chr19 | CSH | 15285290 | 0 |
| CHB | chr19 | CSH | 15335290 | 0 |
| CHB | chr19 | CSH | 15385290 | 0 |
| CHB | chr19 | CSH | 15435290 | 0 |
| CHB | chr19 | CSH | 15485290 | 0 |
| CHB | chr19 | CSH | 15535290 | 0 |
| CHB | chr19 | CSH | 15585290 | 0 |
| CHB | chr19 | CSH | 15635290 | 0 |
| CHB | chr19 | CSH | 15685290 | 0 |
| CHB | chr19 | CSH | 15735290 | 0 |
| CHB | chr19 | CSH | 15785290 | 0 |
| CHB | chr19 | CSH | 15835290 | 0 |
| CHB | chr19 | CSH | 15885290 | 0 |
| CHB | chr19 | CSH | 15935290 | 0 |
| CHB | chr19 | CSH | 15985290 | 0 |
| CHB | chr19 | CSH | 16035290 | 0 |
| CHB | chr19 | CSH | 16085290 | 0 |
| CHB | chr19 | CSH | 16135290 | 0 |
| CHB | chr19 | CSH | 16185290 | 0 |
| CHB | chr19 | CSH | 16235290 | 0 |
| CHB | chr19 | CSH | 16285290 | 0 |
| CHB | chr19 | CSH | 16335290 | 0 |
| CHB | chr19 | CSH | 16385290 | 0 |

## 3\_Introgression\_data

|     |       |     |          |    |
|-----|-------|-----|----------|----|
| CHB | chr19 | CSH | 53548333 | 26 |
| CHB | chr19 | CSH | 53598333 | 0  |
| CHB | chr19 | CSH | 53648333 | 61 |
| CHB | chr19 | CSH | 53698333 | 61 |
| CHB | chr19 | CSH | 53748333 | 0  |
| CHB | chr19 | CSH | 53798333 | 0  |
| CHB | chr19 | CSH | 53848333 | 0  |
| CHB | chr19 | CSH | 53898333 | 8  |
| CHB | chr19 | CSH | 53948333 | 24 |
| CHB | chr19 | CSH | 53998333 | 16 |
| CHB | chr19 | CSH | 54048333 | 0  |
| CHB | chr19 | CSH | 54098333 | 0  |
| CHB | chr19 | CSH | 54148333 | 0  |
| CHB | chr19 | CSH | 54198333 | 0  |
| CHB | chr19 | CSH | 54248333 | 0  |
| CHB | chr19 | CSH | 54298333 | 0  |
| CHB | chr19 | CSH | 54348333 | 0  |
| CHB | chr19 | CSH | 54398333 | 0  |
| CHB | chr19 | CSH | 54448333 | 0  |
| CHB | chr19 | CSH | 54498333 | 0  |
| CHB | chr19 | CSH | 54548333 | 0  |
| CHB | chr19 | CSH | 54598333 | 0  |
| CHB | chr19 | CSH | 54648333 | 0  |
| CHB | chr19 | CSH | 54698333 | 0  |
| CHB | chr19 | CSH | 54748333 | 49 |
| CHB | chr19 | CSH | 54798333 | 53 |
| CHB | chr19 | CSH | 54848333 | 9  |
| CHB | chr19 | CSH | 54898333 | 30 |
| CHB | chr19 | CSH | 54948333 | 25 |
| CHB | chr19 | CSH | 54998333 | 0  |
| CHB | chr19 | CSH | 55048333 | 0  |
| CHB | chr19 | CSH | 55098333 | 0  |
| CHB | chr19 | CSH | 55148333 | 0  |
| CHB | chr19 | CSH | 55198333 | 0  |
| CHB | chr19 | CSH | 55248333 | 0  |
| CHB | chr19 | CSH | 55298333 | 0  |
| CHB | chr19 | CSH | 55348333 | 0  |
| CHB | chr19 | CSH | 55398333 | 0  |
| CHB | chr19 | CSH | 55448333 | 0  |
| CHB | chr19 | CSH | 55498333 | 0  |
| CHB | chr19 | CSH | 55548333 | 0  |
| CHB | chr19 | CSH | 55598333 | 0  |
| CHB | chr19 | CSH | 55648333 | 0  |
| CHB | chr19 | CSH | 55698333 | 0  |
| CHB | chr19 | CSH | 55748333 | 0  |
| CHB | chr19 | CSH | 55798333 | 0  |
| CHB | chr19 | CSH | 55848333 | 0  |
| CHB | chr19 | CSH | 55898333 | 0  |
| CHB | chr19 | CSH | 55948333 | 0  |

## 3\_Introgression\_data

|     |       |     |          |    |
|-----|-------|-----|----------|----|
| CHB | chr19 | CSH | 55998333 | 0  |
| CHB | chr19 | CSH | 56048333 | 0  |
| CHB | chr19 | CSH | 56098333 | 0  |
| CHB | chr19 | CSH | 56148333 | 0  |
| CHB | chr19 | CSH | 56198333 | 0  |
| CHB | chr19 | CSH | 56248333 | 0  |
| CHB | chr19 | CSH | 56298333 | 0  |
| CHB | chr19 | CSH | 56348333 | 0  |
| CHB | chr19 | CSH | 56398333 | 0  |
| CHB | chr19 | CSH | 56448333 | 0  |
| CHB | chr19 | CSH | 56498333 | 0  |
| CHB | chr19 | CSH | 56548333 | 9  |
| CHB | chr19 | CSH | 56598333 | 40 |
| CHB | chr19 | CSH | 56648333 | 55 |
| CHB | chr19 | CSH | 56698333 | 52 |
| CHB | chr19 | CSH | 56748333 | 30 |
| CHB | chr19 | CSH | 56798333 | 2  |
| CHB | chr19 | CSH | 56848333 | 0  |
| CHB | chr19 | CSH | 56898333 | 0  |
| CHB | chr19 | CSH | 56948333 | 0  |
| CHB | chr19 | CSH | 56998333 | 0  |
| CHB | chr19 | CSH | 57048333 | 0  |
| CHB | chr19 | CSH | 57098333 | 0  |
| CHB | chr19 | CSH | 57148333 | 0  |
| CHB | chr19 | CSH | 57198333 | 0  |
| CHB | chr19 | CSH | 57248333 | 0  |
| CHB | chr19 | CSH | 57298333 | 0  |
| CHB | chr19 | CSH | 57348333 | 0  |
| CHB | chr19 | CSH | 57398333 | 0  |
| CHB | chr19 | CSH | 57448333 | 0  |
| CHB | chr19 | CSH | 57498333 | 0  |
| CHB | chr19 | CSH | 57548333 | 0  |
| CHB | chr19 | CSH | 57598333 | 0  |
| CHB | chr19 | CSH | 57648333 | 0  |
| CHB | chr19 | CSH | 57698333 | 0  |
| CHB | chr19 | CSH | 57748333 | 0  |
| CHB | chr19 | CSH | 57798333 | 0  |
| CHB | chr19 | CSH | 57848333 | 0  |
| CHB | chr19 | CSH | 57898333 | 0  |
| CHB | chr19 | CSH | 57948333 | 0  |
| CHB | chr19 | CSH | 57998333 | 0  |
| CHB | chr19 | CSH | 58048333 | 0  |
| CHB | chr19 | CSH | 58098333 | 0  |
| CHB | chr19 | CSH | 58148333 | 0  |
| CHB | chr19 | CSH | 58198333 | 0  |
| CHB | chr19 | CSH | 58248333 | 0  |
| CHB | chr19 | CSH | 58298333 | 0  |
| CHB | chr19 | CSH | 58348333 | 0  |
| CHB | chr19 | CSH | 58398333 | 0  |

## 3\_Introgression\_data

|     |       |     |          |   |
|-----|-------|-----|----------|---|
| CHB | chr19 | CSH | 58448333 | 0 |
| CHB | chr19 | CSH | 58498333 | 0 |
| CHB | chr19 | CSH | 58548333 | 0 |
| CHB | chr19 | CSH | 58598333 | 0 |
| CHB | chr19 | CSH | 58648333 | 0 |
| CHB | chr19 | CSH | 58698333 | 0 |
| CHB | chr19 | CSH | 58748333 | 0 |
| CHB | chr19 | CSH | 58798333 | 0 |
| CHB | chr19 | CSH | 58848333 | 0 |
| CHB | chr19 | CSH | 58898333 | 0 |
| CHB | chr19 | CSH | 58948333 | 0 |
| CHB | chr19 | CSH | 58998333 | 0 |
| CHB | chr19 | CSH | 59048333 | 0 |
| CHB | chr19 | CSH | 59098333 | 0 |
| CHB | chr19 | CSH | 59148333 | 0 |
| CHB | chr19 | CSH | 59198333 | 0 |
| CHB | chr19 | CSH | 59248333 | 0 |
| CHB | chr19 | CSH | 59298333 | 0 |
| CHB | chr19 | CSH | 59348333 | 0 |
| CHB | chr19 | CSH | 59398333 | 0 |
| CHB | chr19 | CSH | 59448333 | 0 |
| CHB | chr19 | CSH | 59498333 | 0 |
| CHB | chr19 | CSH | 59548333 | 0 |
| CHB | chr19 | CSH | 59598333 | 0 |
| CHB | chr19 | CSH | 59648333 | 0 |
| CHB | chr19 | CSH | 59698333 | 0 |
| CHB | chr19 | CSH | 59748333 | 0 |
| CHB | chr19 | CSH | 59798333 | 0 |
| CHB | chr19 | CSH | 59848333 | 0 |
| CHB | chr19 | CSH | 59898333 | 0 |
| CHB | chr19 | CSH | 59948333 | 0 |
| CHB | chr19 | CSH | 59998333 | 0 |
| CHB | chr19 | CSH | 60048333 | 0 |
| CHB | chr19 | CSH | 60098333 | 0 |
| CHB | chr19 | CSH | 60148333 | 0 |
| CHB | chr19 | CSH | 60198333 | 0 |
| CHB | chr19 | CSH | 60248333 | 0 |
| CHB | chr19 | CSH | 60298333 | 0 |
| CHB | chr19 | CSH | 60348333 | 0 |
| CHB | chr19 | CSH | 60398333 | 0 |
| CHB | chr19 | CSH | 60448333 | 0 |
| CHB | chr19 | CSH | 60498333 | 0 |
| CHB | chr19 | CSH | 60548333 | 0 |
| CHB | chr19 | CSH | 60598333 | 0 |
| CHB | chr19 | CSH | 60648333 | 0 |
| CHB | chr19 | CSH | 60698333 | 0 |
| CHB | chr19 | CSH | 60748333 | 0 |
| CHB | chr19 | CSH | 60798333 | 0 |
| CHB | chr19 | CSH | 60848333 | 0 |

## 3\_Introgression\_data

|     |       |     |          |   |
|-----|-------|-----|----------|---|
| CHB | chr19 | CSH | 60898333 | 0 |
| CHB | chr19 | CSH | 60948333 | 0 |
| CHB | chr19 | CSH | 60998333 | 0 |
| CHB | chr19 | CSH | 61048333 | 0 |
| CHB | chr19 | CSH | 61098333 | 0 |
| CHB | chr19 | CSH | 61148333 | 0 |
| CHB | chr19 | CSH | 61198333 | 0 |
| CHB | chr19 | CSH | 61248333 | 0 |
| CHB | chr19 | CSH | 61298333 | 0 |
| CHB | chr19 | CSH | 61348333 | 0 |
| CHB | chr19 | CSH | 61398333 | 0 |
| CHB | chr19 | CSH | 61448333 | 0 |
| CHB | chr19 | CSH | 61498333 | 0 |
| CHB | chr19 | CSH | 61548333 | 0 |
| CHB | chr19 | CSH | 61598333 | 0 |
| CHB | chr19 | CSH | 61648333 | 0 |
| CHB | chr19 | CSH | 61698333 | 0 |
| CHB | chr19 | CSH | 61748333 | 0 |
| CHB | chr19 | CSH | 61798333 | 0 |
| CHB | chr19 | CSH | 61848333 | 0 |
| CHB | chr19 | CSH | 61898333 | 0 |
| CHB | chr19 | CSH | 61948333 | 0 |
| CHB | chr19 | CSH | 61998333 | 0 |
| CHB | chr19 | CSH | 62048333 | 0 |
| CHB | chr19 | CSH | 62098333 | 0 |
| CHB | chr19 | CSH | 62148333 | 0 |
| CHB | chr19 | CSH | 62198333 | 0 |
| CHB | chr19 | CSH | 62248333 | 0 |
| CHB | chr19 | CSH | 62298333 | 0 |
| CHB | chr19 | CSH | 62348333 | 0 |
| CHB | chr19 | CSH | 62398333 | 0 |
| CHB | chr19 | CSH | 62448333 | 0 |
| CHB | chr19 | CSH | 62498333 | 0 |
| CHB | chr19 | CSH | 62548333 | 0 |
| CHB | chr19 | CSH | 62598333 | 0 |
| CHB | chr19 | CSH | 62648333 | 0 |
| CHB | chr19 | CSH | 62698333 | 0 |
| CHB | chr19 | CSH | 62748333 | 0 |
| CHB | chr19 | CSH | 62798333 | 0 |
| CHB | chr19 | CSH | 62848333 | 0 |
| CHB | chr19 | CSH | 62898333 | 0 |
| CHB | chr19 | CSH | 62948333 | 0 |
| CHB | chr19 | CSH | 62998333 | 0 |
| CHB | chr19 | CSH | 63048333 | 0 |
| CHB | chr19 | CSH | 63098333 | 0 |
| CHB | chr19 | CSH | 63148333 | 0 |
| CHB | chr19 | CSH | 63198333 | 0 |
| CHB | chr19 | CSH | 63248333 | 0 |
| CHB | chr19 | CSH | 63298333 | 0 |



## 3\_Introgression\_data

|     |       |       |          |     |
|-----|-------|-------|----------|-----|
| CHB | chr19 | CSH   | 63348333 | 0   |
| CHB | chr19 | CSH   | 63398333 | 0   |
| CHB | chr19 | CSH   | 63448333 | 0   |
| CHB | chr8  | DEFA1 | 2027649  | 71  |
| CHB | chr8  | DEFA1 | 2077649  | 115 |
| CHB | chr8  | DEFA1 | 2127649  | 139 |
| CHB | chr8  | DEFA1 | 2177649  | 71  |
| CHB | chr8  | DEFA1 | 2227649  | 8   |
| CHB | chr8  | DEFA1 | 2277649  | 6   |
| CHB | chr8  | DEFA1 | 2327649  | 41  |
| CHB | chr8  | DEFA1 | 2377649  | 59  |
| CHB | chr8  | DEFA1 | 2427649  | 48  |
| CHB | chr8  | DEFA1 | 2477649  | 51  |
| CHB | chr8  | DEFA1 | 2527649  | 38  |
| CHB | chr8  | DEFA1 | 2577649  | 31  |
| CHB | chr8  | DEFA1 | 2627649  | 50  |
| CHB | chr8  | DEFA1 | 2677649  | 57  |
| CHB | chr8  | DEFA1 | 2727649  | 51  |
| CHB | chr8  | DEFA1 | 2777649  | 35  |
| CHB | chr8  | DEFA1 | 2827649  | 27  |
| CHB | chr8  | DEFA1 | 2877649  | 63  |
| CHB | chr8  | DEFA1 | 2927649  | 72  |
| CHB | chr8  | DEFA1 | 2977649  | 57  |
| CHB | chr8  | DEFA1 | 3027649  | 47  |
| CHB | chr8  | DEFA1 | 3077649  | 60  |
| CHB | chr8  | DEFA1 | 3127649  | 82  |
| CHB | chr8  | DEFA1 | 3177649  | 101 |
| CHB | chr8  | DEFA1 | 3227649  | 125 |
| CHB | chr8  | DEFA1 | 3277649  | 132 |
| CHB | chr8  | DEFA1 | 3327649  | 102 |
| CHB | chr8  | DEFA1 | 3377649  | 42  |
| CHB | chr8  | DEFA1 | 3427649  | 47  |
| CHB | chr8  | DEFA1 | 3477649  | 93  |
| CHB | chr8  | DEFA1 | 3527649  | 107 |
| CHB | chr8  | DEFA1 | 3577649  | 57  |
| CHB | chr8  | DEFA1 | 3627649  | 7   |
| CHB | chr8  | DEFA1 | 3677649  | 7   |
| CHB | chr8  | DEFA1 | 3727649  | 10  |
| CHB | chr8  | DEFA1 | 3777649  | 12  |
| CHB | chr8  | DEFA1 | 3827649  | 14  |
| CHB | chr8  | DEFA1 | 3877649  | 11  |
| CHB | chr8  | DEFA1 | 3927649  | 8   |
| CHB | chr8  | DEFA1 | 3977649  | 8   |
| CHB | chr8  | DEFA1 | 4027649  | 12  |
| CHB | chr8  | DEFA1 | 4077649  | 20  |
| CHB | chr8  | DEFA1 | 4127649  | 29  |
| CHB | chr8  | DEFA1 | 4177649  | 65  |
| CHB | chr8  | DEFA1 | 4227649  | 121 |
| CHB | chr8  | DEFA1 | 4277649  | 103 |

## 3\_Introgression\_data

|     |      |       |         |    |
|-----|------|-------|---------|----|
| CHB | chr8 | DEFA1 | 4327649 | 43 |
| CHB | chr8 | DEFA1 | 4377649 | 30 |
| CHB | chr8 | DEFA1 | 4427649 | 28 |
| CHB | chr8 | DEFA1 | 4477649 | 20 |
| CHB | chr8 | DEFA1 | 4527649 | 11 |
| CHB | chr8 | DEFA1 | 4577649 | 22 |
| CHB | chr8 | DEFA1 | 4627649 | 77 |
| CHB | chr8 | DEFA1 | 4677649 | 66 |
| CHB | chr8 | DEFA1 | 4727649 | 22 |
| CHB | chr8 | DEFA1 | 4777649 | 44 |
| CHB | chr8 | DEFA1 | 4827649 | 61 |
| CHB | chr8 | DEFA1 | 4877649 | 90 |
| CHB | chr8 | DEFA1 | 4927649 | 89 |
| CHB | chr8 | DEFA1 | 4977649 | 83 |
| CHB | chr8 | DEFA1 | 5027649 | 75 |
| CHB | chr8 | DEFA1 | 5077649 | 37 |
| CHB | chr8 | DEFA1 | 5127649 | 29 |
| CHB | chr8 | DEFA1 | 5177649 | 29 |
| CHB | chr8 | DEFA1 | 5227649 | 55 |
| CHB | chr8 | DEFA1 | 5277649 | 93 |
| CHB | chr8 | DEFA1 | 5327649 | 86 |
| CHB | chr8 | DEFA1 | 5377649 | 65 |
| CHB | chr8 | DEFA1 | 5427649 | 50 |
| CHB | chr8 | DEFA1 | 5477649 | 44 |
| CHB | chr8 | DEFA1 | 5527649 | 53 |
| CHB | chr8 | DEFA1 | 5577649 | 54 |
| CHB | chr8 | DEFA1 | 5627649 | 83 |
| CHB | chr8 | DEFA1 | 5677649 | 97 |
| CHB | chr8 | DEFA1 | 5727649 | 61 |
| CHB | chr8 | DEFA1 | 5777649 | 59 |
| CHB | chr8 | DEFA1 | 5827649 | 66 |
| CHB | chr8 | DEFA1 | 5877649 | 57 |
| CHB | chr8 | DEFA1 | 5927649 | 72 |
| CHB | chr8 | DEFA1 | 5977649 | 70 |
| CHB | chr8 | DEFA1 | 6027649 | 51 |
| CHB | chr8 | DEFA1 | 6077649 | 82 |
| CHB | chr8 | DEFA1 | 6127649 | 68 |
| CHB | chr8 | DEFA1 | 6177649 | 27 |
| CHB | chr8 | DEFA1 | 6227649 | 54 |
| CHB | chr8 | DEFA1 | 6277649 | 88 |
| CHB | chr8 | DEFA1 | 6327649 | 81 |
| CHB | chr8 | DEFA1 | 6377649 | 38 |
| CHB | chr8 | DEFA1 | 6427649 | 9  |
| CHB | chr8 | DEFA1 | 6477649 | 0  |
| CHB | chr8 | DEFA1 | 6527649 | 0  |
| CHB | chr8 | DEFA1 | 6577649 | 0  |
| CHB | chr8 | DEFA1 | 6627649 | 0  |
| CHB | chr8 | DEFA1 | 6677649 | 0  |
| CHB | chr8 | DEFA1 | 6727649 | 0  |

## 3\_Introgression\_data

|     |      |       |         |    |
|-----|------|-------|---------|----|
| CHB | chr8 | DEFA1 | 6777649 | 0  |
| CHB | chr8 | DEFA1 | 6827649 | 0  |
| CHB | chr8 | DEFA1 | 6877649 | 0  |
| CHB | chr8 | DEFA1 | 6927649 | 51 |
| CHB | chr8 | DEFA1 | 6977649 | 94 |
| CHB | chr8 | DEFA1 | 7027649 | 43 |
| CHB | chr8 | DEFA1 | 7077649 | 0  |
| CHB | chr8 | DEFA1 | 7127649 | 0  |
| CHB | chr8 | DEFA1 | 7177649 | 0  |
| CHB | chr8 | DEFA1 | 7227649 | 0  |
| CHB | chr8 | DEFA1 | 7277649 | 0  |
| CHB | chr8 | DEFA1 | 7327649 | 0  |
| CHB | chr8 | DEFA1 | 7377649 | 0  |
| CHB | chr8 | DEFA1 | 7427649 | 0  |
| CHB | chr8 | DEFA1 | 7477649 | 0  |
| CHB | chr8 | DEFA1 | 7527649 | 0  |
| CHB | chr8 | DEFA1 | 7577649 | 0  |
| CHB | chr8 | DEFA1 | 7627649 | 0  |
| CHB | chr8 | DEFA1 | 7677649 | 0  |
| CHB | chr8 | DEFA1 | 7727649 | 0  |
| CHB | chr8 | DEFA1 | 7777649 | 0  |
| CHB | chr8 | DEFA1 | 7827649 | 0  |
| CHB | chr8 | DEFA1 | 7877649 | 0  |
| CHB | chr8 | DEFA1 | 7927649 | 0  |
| CHB | chr8 | DEFA1 | 7977649 | 0  |
| CHB | chr8 | DEFA1 | 8027649 | 8  |
| CHB | chr8 | DEFA1 | 8077649 | 45 |
| CHB | chr8 | DEFA1 | 8127649 | 57 |
| CHB | chr8 | DEFA1 | 8177649 | 50 |
| CHB | chr8 | DEFA1 | 8227649 | 49 |
| CHB | chr8 | DEFA1 | 8277649 | 46 |
| CHB | chr8 | DEFA1 | 8327649 | 37 |
| CHB | chr8 | DEFA1 | 8377649 | 10 |
| CHB | chr8 | DEFA1 | 8427649 | 0  |
| CHB | chr8 | DEFA1 | 8477649 | 0  |
| CHB | chr8 | DEFA1 | 8527649 | 0  |
| CHB | chr8 | DEFA1 | 8577649 | 0  |
| CHB | chr8 | DEFA1 | 8627649 | 0  |
| CHB | chr8 | DEFA1 | 8677649 | 0  |
| CHB | chr8 | DEFA1 | 8727649 | 0  |
| CHB | chr8 | DEFA1 | 8777649 | 0  |
| CHB | chr8 | DEFA1 | 8827649 | 0  |
| CHB | chr8 | DEFA1 | 8877649 | 0  |
| CHB | chr8 | DEFA1 | 8927649 | 0  |
| CHB | chr8 | DEFA1 | 8977649 | 1  |
| CHB | chr8 | DEFA1 | 9027649 | 43 |
| CHB | chr8 | DEFA1 | 9077649 | 71 |
| CHB | chr8 | DEFA1 | 9127649 | 40 |
| CHB | chr8 | DEFA1 | 9177649 | 11 |

## 3\_Introgression\_data

|     |      |       |          |   |
|-----|------|-------|----------|---|
| CHB | chr8 | DEFA1 | 9227649  | 0 |
| CHB | chr8 | DEFA1 | 9277649  | 0 |
| CHB | chr8 | DEFA1 | 9327649  | 0 |
| CHB | chr8 | DEFA1 | 9377649  | 0 |
| CHB | chr8 | DEFA1 | 9427649  | 0 |
| CHB | chr8 | DEFA1 | 9477649  | 0 |
| CHB | chr8 | DEFA1 | 9527649  | 0 |
| CHB | chr8 | DEFA1 | 9577649  | 0 |
| CHB | chr8 | DEFA1 | 9627649  | 0 |
| CHB | chr8 | DEFA1 | 9677649  | 0 |
| CHB | chr8 | DEFA1 | 9727649  | 0 |
| CHB | chr8 | DEFA1 | 9777649  | 0 |
| CHB | chr8 | DEFA1 | 9827649  | 0 |
| CHB | chr8 | DEFA1 | 9877649  | 0 |
| CHB | chr8 | DEFA1 | 9927649  | 0 |
| CHB | chr8 | DEFA1 | 9977649  | 0 |
| CHB | chr8 | DEFA1 | 10027649 | 0 |
| CHB | chr8 | DEFA1 | 10077649 | 0 |
| CHB | chr8 | DEFA1 | 10127649 | 0 |
| CHB | chr8 | DEFA1 | 10177649 | 0 |
| CHB | chr8 | DEFA1 | 10227649 | 0 |
| CHB | chr8 | DEFA1 | 10277649 | 0 |
| CHB | chr8 | DEFA1 | 10327649 | 0 |
| CHB | chr8 | DEFA1 | 10377649 | 0 |
| CHB | chr8 | DEFA1 | 10427649 | 0 |
| CHB | chr8 | DEFA1 | 10477649 | 0 |
| CHB | chr8 | DEFA1 | 10527649 | 0 |
| CHB | chr8 | DEFA1 | 10577649 | 0 |
| CHB | chr8 | DEFA1 | 10627649 | 0 |
| CHB | chr8 | DEFA1 | 10677649 | 0 |
| CHB | chr8 | DEFA1 | 10727649 | 0 |
| CHB | chr8 | DEFA1 | 10777649 | 0 |
| CHB | chr8 | DEFA1 | 10827649 | 0 |
| CHB | chr8 | DEFA1 | 10877649 | 0 |
| CHB | chr8 | DEFA1 | 10927649 | 0 |
| CHB | chr8 | DEFA1 | 10977649 | 0 |
| CHB | chr8 | DEFA1 | 11027649 | 0 |
| CHB | chr8 | DEFA1 | 11077649 | 0 |
| CHB | chr8 | DEFA1 | 11127649 | 0 |
| CHB | chr8 | DEFA1 | 11177649 | 0 |
| CHB | chr8 | DEFA1 | 11227649 | 0 |
| CHB | chr8 | DEFA1 | 11277649 | 0 |
| CHB | chr8 | DEFA1 | 11327649 | 0 |
| CHB | chr8 | DEFA1 | 11377649 | 0 |
| CHB | chr8 | DEFA1 | 11427649 | 0 |
| CHB | chr8 | DEFA1 | 11477649 | 0 |
| CHB | chr8 | DEFA1 | 11527649 | 0 |
| CHB | chr8 | DEFA1 | 11577649 | 0 |
| CHB | chr8 | DEFA1 | 11627649 | 0 |

## 3\_Introgression\_data

|     |      |         |          |    |
|-----|------|---------|----------|----|
| CHB | chr8 | DEFA1   | 11677649 | 0  |
| CHB | chr8 | DEFA1   | 11727649 | 0  |
| CHB | chr8 | DEFA1   | 11777649 | 0  |
| CHB | chr8 | DEFA1   | 11827649 | 0  |
| CHB | chr8 | DEFA1   | 11877649 | 0  |
| CHB | chr8 | DEFA1   | 11927649 | 0  |
| CHB | chr8 | DEFB130 | 7114389  | 0  |
| CHB | chr8 | DEFB130 | 7164389  | 0  |
| CHB | chr8 | DEFB130 | 7214389  | 0  |
| CHB | chr8 | DEFB130 | 7264389  | 0  |
| CHB | chr8 | DEFB130 | 7314389  | 0  |
| CHB | chr8 | DEFB130 | 7364389  | 0  |
| CHB | chr8 | DEFB130 | 7414389  | 0  |
| CHB | chr8 | DEFB130 | 7464389  | 0  |
| CHB | chr8 | DEFB130 | 7514389  | 0  |
| CHB | chr8 | DEFB130 | 7564389  | 0  |
| CHB | chr8 | DEFB130 | 7614389  | 0  |
| CHB | chr8 | DEFB130 | 7664389  | 0  |
| CHB | chr8 | DEFB130 | 7714389  | 0  |
| CHB | chr8 | DEFB130 | 7764389  | 0  |
| CHB | chr8 | DEFB130 | 7814389  | 0  |
| CHB | chr8 | DEFB130 | 7864389  | 0  |
| CHB | chr8 | DEFB130 | 7914389  | 0  |
| CHB | chr8 | DEFB130 | 7964389  | 0  |
| CHB | chr8 | DEFB130 | 8014389  | 0  |
| CHB | chr8 | DEFB130 | 8064389  | 33 |
| CHB | chr8 | DEFB130 | 8114389  | 59 |
| CHB | chr8 | DEFB130 | 8164389  | 54 |
| CHB | chr8 | DEFB130 | 8214389  | 46 |
| CHB | chr8 | DEFB130 | 8264389  | 42 |
| CHB | chr8 | DEFB130 | 8314389  | 46 |
| CHB | chr8 | DEFB130 | 8364389  | 22 |
| CHB | chr8 | DEFB130 | 8414389  | 0  |
| CHB | chr8 | DEFB130 | 8464389  | 0  |
| CHB | chr8 | DEFB130 | 8514389  | 0  |
| CHB | chr8 | DEFB130 | 8564389  | 0  |
| CHB | chr8 | DEFB130 | 8614389  | 0  |
| CHB | chr8 | DEFB130 | 8664389  | 0  |
| CHB | chr8 | DEFB130 | 8714389  | 0  |
| CHB | chr8 | DEFB130 | 8764389  | 0  |
| CHB | chr8 | DEFB130 | 8814389  | 0  |
| CHB | chr8 | DEFB130 | 8864389  | 0  |
| CHB | chr8 | DEFB130 | 8914389  | 0  |
| CHB | chr8 | DEFB130 | 8964389  | 0  |
| CHB | chr8 | DEFB130 | 9014389  | 26 |
| CHB | chr8 | DEFB130 | 9064389  | 64 |
| CHB | chr8 | DEFB130 | 9114389  | 57 |
| CHB | chr8 | DEFB130 | 9164389  | 19 |
| CHB | chr8 | DEFB130 | 9214389  | 0  |

## 3\_Introgression\_data

|     |      |         |          |   |
|-----|------|---------|----------|---|
| CHB | chr8 | DEFB130 | 9264389  | 0 |
| CHB | chr8 | DEFB130 | 9314389  | 0 |
| CHB | chr8 | DEFB130 | 9364389  | 0 |
| CHB | chr8 | DEFB130 | 9414389  | 0 |
| CHB | chr8 | DEFB130 | 9464389  | 0 |
| CHB | chr8 | DEFB130 | 9514389  | 0 |
| CHB | chr8 | DEFB130 | 9564389  | 0 |
| CHB | chr8 | DEFB130 | 9614389  | 0 |
| CHB | chr8 | DEFB130 | 9664389  | 0 |
| CHB | chr8 | DEFB130 | 9714389  | 0 |
| CHB | chr8 | DEFB130 | 9764389  | 0 |
| CHB | chr8 | DEFB130 | 9814389  | 0 |
| CHB | chr8 | DEFB130 | 9864389  | 0 |
| CHB | chr8 | DEFB130 | 9914389  | 0 |
| CHB | chr8 | DEFB130 | 9964389  | 0 |
| CHB | chr8 | DEFB130 | 10014389 | 0 |
| CHB | chr8 | DEFB130 | 10064389 | 0 |
| CHB | chr8 | DEFB130 | 10114389 | 0 |
| CHB | chr8 | DEFB130 | 10164389 | 0 |
| CHB | chr8 | DEFB130 | 10214389 | 0 |
| CHB | chr8 | DEFB130 | 10264389 | 0 |
| CHB | chr8 | DEFB130 | 10314389 | 0 |
| CHB | chr8 | DEFB130 | 10364389 | 0 |
| CHB | chr8 | DEFB130 | 10414389 | 0 |
| CHB | chr8 | DEFB130 | 10464389 | 0 |
| CHB | chr8 | DEFB130 | 10514389 | 0 |
| CHB | chr8 | DEFB130 | 10564389 | 0 |
| CHB | chr8 | DEFB130 | 10614389 | 0 |
| CHB | chr8 | DEFB130 | 10664389 | 0 |
| CHB | chr8 | DEFB130 | 10714389 | 0 |
| CHB | chr8 | DEFB130 | 10764389 | 0 |
| CHB | chr8 | DEFB130 | 10814389 | 0 |
| CHB | chr8 | DEFB130 | 10864389 | 0 |
| CHB | chr8 | DEFB130 | 10914389 | 0 |
| CHB | chr8 | DEFB130 | 10964389 | 0 |
| CHB | chr8 | DEFB130 | 11014389 | 0 |
| CHB | chr8 | DEFB130 | 11064389 | 0 |
| CHB | chr8 | DEFB130 | 11114389 | 0 |
| CHB | chr8 | DEFB130 | 11164389 | 0 |
| CHB | chr8 | DEFB130 | 11214389 | 0 |
| CHB | chr8 | DEFB130 | 11264389 | 0 |
| CHB | chr8 | DEFB130 | 11314389 | 0 |
| CHB | chr8 | DEFB130 | 11364389 | 0 |
| CHB | chr8 | DEFB130 | 11414389 | 0 |
| CHB | chr8 | DEFB130 | 11464389 | 0 |
| CHB | chr8 | DEFB130 | 11514389 | 0 |
| CHB | chr8 | DEFB130 | 11564389 | 0 |
| CHB | chr8 | DEFB130 | 11614389 | 0 |
| CHB | chr8 | DEFB130 | 11664389 | 0 |

## 3\_Introgression\_data

|     |      |         |          |    |
|-----|------|---------|----------|----|
| CHB | chr8 | DEFB130 | 11714389 | 0  |
| CHB | chr8 | DEFB130 | 11764389 | 0  |
| CHB | chr8 | DEFB130 | 11814389 | 0  |
| CHB | chr8 | DEFB130 | 11864389 | 0  |
| CHB | chr8 | DEFB130 | 11914389 | 0  |
| CHB | chr8 | DEFB130 | 11964389 | 0  |
| CHB | chr8 | DEFB130 | 12014389 | 0  |
| CHB | chr8 | DEFB130 | 12064389 | 0  |
| CHB | chr8 | DEFB130 | 12114389 | 0  |
| CHB | chr8 | DEFB130 | 12164389 | 0  |
| CHB | chr8 | DEFB130 | 12214389 | 0  |
| CHB | chr8 | DEFB130 | 12264389 | 0  |
| CHB | chr8 | DEFB130 | 12314389 | 0  |
| CHB | chr8 | DEFB130 | 12364389 | 0  |
| CHB | chr8 | DEFB130 | 12414389 | 1  |
| CHB | chr8 | DEFB130 | 12464389 | 51 |
| CHB | chr8 | DEFB130 | 12514389 | 84 |
| CHB | chr8 | DEFB130 | 12564389 | 61 |
| CHB | chr8 | DEFB130 | 12614389 | 50 |
| CHB | chr8 | DEFB130 | 12664389 | 47 |
| CHB | chr8 | DEFB130 | 12714389 | 24 |
| CHB | chr8 | DEFB130 | 12764389 | 3  |
| CHB | chr8 | DEFB130 | 12814389 | 34 |
| CHB | chr8 | DEFB130 | 12864389 | 62 |
| CHB | chr8 | DEFB130 | 12914389 | 73 |
| CHB | chr8 | DEFB130 | 12964389 | 46 |
| CHB | chr8 | DEFB130 | 13014389 | 4  |
| CHB | chr8 | DEFB130 | 13064389 | 0  |
| CHB | chr8 | DEFB130 | 13114389 | 0  |
| CHB | chr8 | DEFB130 | 13164389 | 0  |
| CHB | chr8 | DEFB130 | 13214389 | 0  |
| CHB | chr8 | DEFB130 | 13264389 | 0  |
| CHB | chr8 | DEFB130 | 13314389 | 0  |
| CHB | chr8 | DEFB130 | 13364389 | 0  |
| CHB | chr8 | DEFB130 | 13414389 | 0  |
| CHB | chr8 | DEFB130 | 13464389 | 0  |
| CHB | chr8 | DEFB130 | 13514389 | 0  |
| CHB | chr8 | DEFB130 | 13564389 | 0  |
| CHB | chr8 | DEFB130 | 13614389 | 0  |
| CHB | chr8 | DEFB130 | 13664389 | 0  |
| CHB | chr8 | DEFB130 | 13714389 | 41 |
| CHB | chr8 | DEFB130 | 13764389 | 70 |
| CHB | chr8 | DEFB130 | 13814389 | 75 |
| CHB | chr8 | DEFB130 | 13864389 | 80 |
| CHB | chr8 | DEFB130 | 13914389 | 45 |
| CHB | chr8 | DEFB130 | 13964389 | 26 |
| CHB | chr8 | DEFB130 | 14014389 | 33 |
| CHB | chr8 | DEFB130 | 14064389 | 71 |
| CHB | chr8 | DEFB130 | 14114389 | 76 |

## 3\_Introgression\_data

|     |      |         |          |     |
|-----|------|---------|----------|-----|
| CHB | chr8 | DEFB130 | 14164389 | 36  |
| CHB | chr8 | DEFB130 | 14214389 | 34  |
| CHB | chr8 | DEFB130 | 14264389 | 33  |
| CHB | chr8 | DEFB130 | 14314389 | 26  |
| CHB | chr8 | DEFB130 | 14364389 | 41  |
| CHB | chr8 | DEFB130 | 14414389 | 54  |
| CHB | chr8 | DEFB130 | 14464389 | 43  |
| CHB | chr8 | DEFB130 | 14514389 | 16  |
| CHB | chr8 | DEFB130 | 14564389 | 0   |
| CHB | chr8 | DEFB130 | 14614389 | 0   |
| CHB | chr8 | DEFB130 | 14664389 | 0   |
| CHB | chr8 | DEFB130 | 14714389 | 0   |
| CHB | chr8 | DEFB130 | 14764389 | 0   |
| CHB | chr8 | DEFB130 | 14814389 | 0   |
| CHB | chr8 | DEFB130 | 14864389 | 0   |
| CHB | chr8 | DEFB130 | 14914389 | 0   |
| CHB | chr8 | DEFB130 | 14964389 | 0   |
| CHB | chr8 | DEFB130 | 15014389 | 0   |
| CHB | chr8 | DEFB130 | 15064389 | 0   |
| CHB | chr8 | DEFB130 | 15114389 | 0   |
| CHB | chr8 | DEFB130 | 15164389 | 0   |
| CHB | chr8 | DEFB130 | 15214389 | 0   |
| CHB | chr8 | DEFB130 | 15264389 | 0   |
| CHB | chr8 | DEFB130 | 15314389 | 0   |
| CHB | chr8 | DEFB130 | 15364389 | 6   |
| CHB | chr8 | DEFB130 | 15414389 | 15  |
| CHB | chr8 | DEFB130 | 15464389 | 28  |
| CHB | chr8 | DEFB130 | 15514389 | 36  |
| CHB | chr8 | DEFB130 | 15564389 | 47  |
| CHB | chr8 | DEFB130 | 15614389 | 38  |
| CHB | chr8 | DEFB130 | 15664389 | 8   |
| CHB | chr8 | DEFB130 | 15714389 | 0   |
| CHB | chr8 | DEFB130 | 15764389 | 0   |
| CHB | chr8 | DEFB130 | 15814389 | 27  |
| CHB | chr8 | DEFB130 | 15864389 | 103 |
| CHB | chr8 | DEFB130 | 15914389 | 117 |
| CHB | chr8 | DEFB130 | 15964389 | 63  |
| CHB | chr8 | DEFB130 | 16014389 | 62  |
| CHB | chr8 | DEFB130 | 16064389 | 73  |
| CHB | chr8 | DEFB130 | 16114389 | 54  |
| CHB | chr8 | DEFB130 | 16164389 | 50  |
| CHB | chr8 | DEFB130 | 16214389 | 55  |
| CHB | chr8 | DEFB130 | 16264389 | 68  |
| CHB | chr8 | DEFB130 | 16314389 | 46  |
| CHB | chr8 | DEFB130 | 16364389 | 4   |
| CHB | chr8 | DEFB130 | 16414389 | 0   |
| CHB | chr8 | DEFB130 | 16464389 | 0   |
| CHB | chr8 | DEFB130 | 16514389 | 0   |
| CHB | chr8 | DEFB130 | 16564389 | 0   |



3\_Introgression\_data

|     |      |         |          |    |
|-----|------|---------|----------|----|
| CHB | chr8 | DEFB130 | 16614389 | 0  |
| CHB | chr8 | DEFB130 | 16664389 | 0  |
| CHB | chr8 | DEFB130 | 16714389 | 0  |
| CHB | chr8 | DEFB130 | 16764389 | 22 |
| CHB | chr8 | DEFB130 | 16814389 | 68 |
| CHB | chr8 | DEFB130 | 16864389 | 52 |
| CHB | chr8 | DEFB130 | 16914389 | 6  |
| CHB | chr8 | DEFB130 | 16964389 | 0  |
| CHB | chr8 | DEFB130 | 17014389 | 0  |
| CHB | chr8 | DEFB130 | 7360962  | 0  |
| CHB | chr8 | DEFB130 | 7410962  | 0  |
| CHB | chr8 | DEFB130 | 7460962  | 0  |
| CHB | chr8 | DEFB130 | 7510962  | 0  |
| CHB | chr8 | DEFB130 | 7560962  | 0  |
| CHB | chr8 | DEFB130 | 7610962  | 0  |
| CHB | chr8 | DEFB130 | 7660962  | 0  |
| CHB | chr8 | DEFB130 | 7710962  | 0  |
| CHB | chr8 | DEFB130 | 7760962  | 0  |
| CHB | chr8 | DEFB130 | 7810962  | 0  |
| CHB | chr8 | DEFB130 | 7860962  | 0  |
| CHB | chr8 | DEFB130 | 7910962  | 0  |
| CHB | chr8 | DEFB130 | 7960962  | 0  |
| CHB | chr8 | DEFB130 | 8010962  | 0  |
| CHB | chr8 | DEFB130 | 8060962  | 32 |
| CHB | chr8 | DEFB130 | 8110962  | 58 |
| CHB | chr8 | DEFB130 | 8160962  | 54 |
| CHB | chr8 | DEFB130 | 8210962  | 47 |
| CHB | chr8 | DEFB130 | 8260962  | 40 |
| CHB | chr8 | DEFB130 | 8310962  | 46 |
| CHB | chr8 | DEFB130 | 8360962  | 25 |
| CHB | chr8 | DEFB130 | 8410962  | 0  |
| CHB | chr8 | DEFB130 | 8460962  | 0  |
| CHB | chr8 | DEFB130 | 8510962  | 0  |
| CHB | chr8 | DEFB130 | 8560962  | 0  |
| CHB | chr8 | DEFB130 | 8610962  | 0  |
| CHB | chr8 | DEFB130 | 8660962  | 0  |
| CHB | chr8 | DEFB130 | 8710962  | 0  |
| CHB | chr8 | DEFB130 | 8760962  | 0  |
| CHB | chr8 | DEFB130 | 8810962  | 0  |
| CHB | chr8 | DEFB130 | 8860962  | 0  |
| CHB | chr8 | DEFB130 | 8910962  | 0  |
| CHB | chr8 | DEFB130 | 8960962  | 0  |
| CHB | chr8 | DEFB130 | 9010962  | 23 |
| CHB | chr8 | DEFB130 | 9060962  | 59 |
| CHB | chr8 | DEFB130 | 9110962  | 60 |
| CHB | chr8 | DEFB130 | 9160962  | 24 |
| CHB | chr8 | DEFB130 | 9210962  | 0  |
| CHB | chr8 | DEFB130 | 9260962  | 0  |
| CHB | chr8 | DEFB130 | 9310962  | 0  |

## 3\_Introgression\_data

|     |      |         |          |   |
|-----|------|---------|----------|---|
| CHB | chr8 | DEFB130 | 9360962  | 0 |
| CHB | chr8 | DEFB130 | 9410962  | 0 |
| CHB | chr8 | DEFB130 | 9460962  | 0 |
| CHB | chr8 | DEFB130 | 9510962  | 0 |
| CHB | chr8 | DEFB130 | 9560962  | 0 |
| CHB | chr8 | DEFB130 | 9610962  | 0 |
| CHB | chr8 | DEFB130 | 9660962  | 0 |
| CHB | chr8 | DEFB130 | 9710962  | 0 |
| CHB | chr8 | DEFB130 | 9760962  | 0 |
| CHB | chr8 | DEFB130 | 9810962  | 0 |
| CHB | chr8 | DEFB130 | 9860962  | 0 |
| CHB | chr8 | DEFB130 | 9910962  | 0 |
| CHB | chr8 | DEFB130 | 9960962  | 0 |
| CHB | chr8 | DEFB130 | 10010962 | 0 |
| CHB | chr8 | DEFB130 | 10060962 | 0 |
| CHB | chr8 | DEFB130 | 10110962 | 0 |
| CHB | chr8 | DEFB130 | 10160962 | 0 |
| CHB | chr8 | DEFB130 | 10210962 | 0 |
| CHB | chr8 | DEFB130 | 10260962 | 0 |
| CHB | chr8 | DEFB130 | 10310962 | 0 |
| CHB | chr8 | DEFB130 | 10360962 | 0 |
| CHB | chr8 | DEFB130 | 10410962 | 0 |
| CHB | chr8 | DEFB130 | 10460962 | 0 |
| CHB | chr8 | DEFB130 | 10510962 | 0 |
| CHB | chr8 | DEFB130 | 10560962 | 0 |
| CHB | chr8 | DEFB130 | 10610962 | 0 |
| CHB | chr8 | DEFB130 | 10660962 | 0 |
| CHB | chr8 | DEFB130 | 10710962 | 0 |
| CHB | chr8 | DEFB130 | 10760962 | 0 |
| CHB | chr8 | DEFB130 | 10810962 | 0 |
| CHB | chr8 | DEFB130 | 10860962 | 0 |
| CHB | chr8 | DEFB130 | 10910962 | 0 |
| CHB | chr8 | DEFB130 | 10960962 | 0 |
| CHB | chr8 | DEFB130 | 11010962 | 0 |
| CHB | chr8 | DEFB130 | 11060962 | 0 |
| CHB | chr8 | DEFB130 | 11110962 | 0 |
| CHB | chr8 | DEFB130 | 11160962 | 0 |
| CHB | chr8 | DEFB130 | 11210962 | 0 |
| CHB | chr8 | DEFB130 | 11260962 | 0 |
| CHB | chr8 | DEFB130 | 11310962 | 0 |
| CHB | chr8 | DEFB130 | 11360962 | 0 |
| CHB | chr8 | DEFB130 | 11410962 | 0 |
| CHB | chr8 | DEFB130 | 11460962 | 0 |
| CHB | chr8 | DEFB130 | 11510962 | 0 |
| CHB | chr8 | DEFB130 | 11560962 | 0 |
| CHB | chr8 | DEFB130 | 11610962 | 0 |
| CHB | chr8 | DEFB130 | 11660962 | 0 |
| CHB | chr8 | DEFB130 | 11710962 | 0 |
| CHB | chr8 | DEFB130 | 11760962 | 0 |

## 3\_Introgression\_data

|     |      |         |          |    |
|-----|------|---------|----------|----|
| CHB | chr8 | DEFB130 | 11810962 | 0  |
| CHB | chr8 | DEFB130 | 11860962 | 0  |
| CHB | chr8 | DEFB130 | 11910962 | 0  |
| CHB | chr8 | DEFB130 | 11960962 | 0  |
| CHB | chr8 | DEFB130 | 12010962 | 0  |
| CHB | chr8 | DEFB130 | 12060962 | 0  |
| CHB | chr8 | DEFB130 | 12110962 | 0  |
| CHB | chr8 | DEFB130 | 12160962 | 0  |
| CHB | chr8 | DEFB130 | 12210962 | 0  |
| CHB | chr8 | DEFB130 | 12260962 | 0  |
| CHB | chr8 | DEFB130 | 12310962 | 0  |
| CHB | chr8 | DEFB130 | 12360962 | 0  |
| CHB | chr8 | DEFB130 | 12410962 | 1  |
| CHB | chr8 | DEFB130 | 12460962 | 46 |
| CHB | chr8 | DEFB130 | 12510962 | 78 |
| CHB | chr8 | DEFB130 | 12560962 | 66 |
| CHB | chr8 | DEFB130 | 12610962 | 54 |
| CHB | chr8 | DEFB130 | 12660962 | 47 |
| CHB | chr8 | DEFB130 | 12710962 | 26 |
| CHB | chr8 | DEFB130 | 12760962 | 0  |
| CHB | chr8 | DEFB130 | 12810962 | 29 |
| CHB | chr8 | DEFB130 | 12860962 | 65 |
| CHB | chr8 | DEFB130 | 12910962 | 74 |
| CHB | chr8 | DEFB130 | 12960962 | 46 |
| CHB | chr8 | DEFB130 | 13010962 | 8  |
| CHB | chr8 | DEFB130 | 13060962 | 0  |
| CHB | chr8 | DEFB130 | 13110962 | 0  |
| CHB | chr8 | DEFB130 | 13160962 | 0  |
| CHB | chr8 | DEFB130 | 13210962 | 0  |
| CHB | chr8 | DEFB130 | 13260962 | 0  |
| CHB | chr8 | DEFB130 | 13310962 | 0  |
| CHB | chr8 | DEFB130 | 13360962 | 0  |
| CHB | chr8 | DEFB130 | 13410962 | 0  |
| CHB | chr8 | DEFB130 | 13460962 | 0  |
| CHB | chr8 | DEFB130 | 13510962 | 0  |
| CHB | chr8 | DEFB130 | 13560962 | 0  |
| CHB | chr8 | DEFB130 | 13610962 | 0  |
| CHB | chr8 | DEFB130 | 13660962 | 0  |
| CHB | chr8 | DEFB130 | 13710962 | 38 |
| CHB | chr8 | DEFB130 | 13760962 | 69 |
| CHB | chr8 | DEFB130 | 13810962 | 77 |
| CHB | chr8 | DEFB130 | 13860962 | 80 |
| CHB | chr8 | DEFB130 | 13910962 | 45 |
| CHB | chr8 | DEFB130 | 13960962 | 27 |
| CHB | chr8 | DEFB130 | 14010962 | 29 |
| CHB | chr8 | DEFB130 | 14060962 | 71 |
| CHB | chr8 | DEFB130 | 14110962 | 81 |
| CHB | chr8 | DEFB130 | 14160962 | 36 |
| CHB | chr8 | DEFB130 | 14210962 | 33 |

### 3\_Introgression\_data

|     |      |         |          |     |
|-----|------|---------|----------|-----|
| CHB | chr8 | DEFB130 | 14260962 | 32  |
| CHB | chr8 | DEFB130 | 14310962 | 26  |
| CHB | chr8 | DEFB130 | 14360962 | 41  |
| CHB | chr8 | DEFB130 | 14410962 | 44  |
| CHB | chr8 | DEFB130 | 14460962 | 42  |
| CHB | chr8 | DEFB130 | 14510962 | 27  |
| CHB | chr8 | DEFB130 | 14560962 | 2   |
| CHB | chr8 | DEFB130 | 14610962 | 0   |
| CHB | chr8 | DEFB130 | 14660962 | 0   |
| CHB | chr8 | DEFB130 | 14710962 | 0   |
| CHB | chr8 | DEFB130 | 14760962 | 0   |
| CHB | chr8 | DEFB130 | 14810962 | 0   |
| CHB | chr8 | DEFB130 | 14860962 | 0   |
| CHB | chr8 | DEFB130 | 14910962 | 0   |
| CHB | chr8 | DEFB130 | 14960962 | 0   |
| CHB | chr8 | DEFB130 | 15010962 | 0   |
| CHB | chr8 | DEFB130 | 15060962 | 0   |
| CHB | chr8 | DEFB130 | 15110962 | 0   |
| CHB | chr8 | DEFB130 | 15160962 | 0   |
| CHB | chr8 | DEFB130 | 15210962 | 0   |
| CHB | chr8 | DEFB130 | 15260962 | 0   |
| CHB | chr8 | DEFB130 | 15310962 | 0   |
| CHB | chr8 | DEFB130 | 15360962 | 6   |
| CHB | chr8 | DEFB130 | 15410962 | 15  |
| CHB | chr8 | DEFB130 | 15460962 | 28  |
| CHB | chr8 | DEFB130 | 15510962 | 36  |
| CHB | chr8 | DEFB130 | 15560962 | 46  |
| CHB | chr8 | DEFB130 | 15610962 | 38  |
| CHB | chr8 | DEFB130 | 15660962 | 9   |
| CHB | chr8 | DEFB130 | 15710962 | 0   |
| CHB | chr8 | DEFB130 | 15760962 | 0   |
| CHB | chr8 | DEFB130 | 15810962 | 22  |
| CHB | chr8 | DEFB130 | 15860962 | 102 |
| CHB | chr8 | DEFB130 | 15910962 | 118 |
| CHB | chr8 | DEFB130 | 15960962 | 62  |
| CHB | chr8 | DEFB130 | 16010962 | 61  |
| CHB | chr8 | DEFB130 | 16060962 | 72  |
| CHB | chr8 | DEFB130 | 16110962 | 57  |
| CHB | chr8 | DEFB130 | 16160962 | 46  |
| CHB | chr8 | DEFB130 | 16210962 | 56  |
| CHB | chr8 | DEFB130 | 16260962 | 72  |
| CHB | chr8 | DEFB130 | 16310962 | 47  |
| CHB | chr8 | DEFB130 | 16360962 | 7   |
| CHB | chr8 | DEFB130 | 16410962 | 0   |
| CHB | chr8 | DEFB130 | 16460962 | 0   |
| CHB | chr8 | DEFB130 | 16510962 | 0   |
| CHB | chr8 | DEFB130 | 16560962 | 0   |
| CHB | chr8 | DEFB130 | 16610962 | 0   |
| CHB | chr8 | DEFB130 | 16660962 | 0   |

3\_Introgression\_data

|     |      |         |           |    |
|-----|------|---------|-----------|----|
| CHB | chr8 | DEFB130 | 16710962  | 0  |
| CHB | chr8 | DEFB130 | 16760962  | 20 |
| CHB | chr8 | DEFB130 | 16810962  | 68 |
| CHB | chr8 | DEFB130 | 16860962  | 54 |
| CHB | chr8 | DEFB130 | 16910962  | 6  |
| CHB | chr8 | DEFB130 | 16960962  | 0  |
| CHB | chr8 | DEFB130 | 17010962  | 0  |
| CHB | chr8 | DEFB130 | 17060962  | 0  |
| CHB | chr8 | DEFB130 | 17110962  | 0  |
| CHB | chr8 | DEFB130 | 17160962  | 0  |
| CHB | chr8 | DEFB130 | 17210962  | 0  |
| CHB | chr8 | DEFB130 | 17260962  | 0  |
| CHB | chr1 | FAM72A  | 201236179 | 0  |
| CHB | chr1 | FAM72A  | 201286179 | 0  |
| CHB | chr1 | FAM72A  | 201336179 | 0  |
| CHB | chr1 | FAM72A  | 201386179 | 0  |
| CHB | chr1 | FAM72A  | 201436179 | 0  |
| CHB | chr1 | FAM72A  | 201486179 | 0  |
| CHB | chr1 | FAM72A  | 201536179 | 0  |
| CHB | chr1 | FAM72A  | 201586179 | 0  |
| CHB | chr1 | FAM72A  | 201636179 | 0  |
| CHB | chr1 | FAM72A  | 201686179 | 0  |
| CHB | chr1 | FAM72A  | 201736179 | 0  |
| CHB | chr1 | FAM72A  | 201786179 | 0  |
| CHB | chr1 | FAM72A  | 201836179 | 0  |
| CHB | chr1 | FAM72A  | 201886179 | 0  |
| CHB | chr1 | FAM72A  | 201936179 | 0  |
| CHB | chr1 | FAM72A  | 201986179 | 0  |
| CHB | chr1 | FAM72A  | 202036179 | 0  |
| CHB | chr1 | FAM72A  | 202086179 | 0  |
| CHB | chr1 | FAM72A  | 202136179 | 0  |
| CHB | chr1 | FAM72A  | 202186179 | 0  |
| CHB | chr1 | FAM72A  | 202236179 | 0  |
| CHB | chr1 | FAM72A  | 202286179 | 0  |
| CHB | chr1 | FAM72A  | 202336179 | 0  |
| CHB | chr1 | FAM72A  | 202386179 | 0  |
| CHB | chr1 | FAM72A  | 202436179 | 0  |
| CHB | chr1 | FAM72A  | 202486179 | 0  |
| CHB | chr1 | FAM72A  | 202536179 | 0  |
| CHB | chr1 | FAM72A  | 202586179 | 0  |
| CHB | chr1 | FAM72A  | 202636179 | 0  |
| CHB | chr1 | FAM72A  | 202686179 | 0  |
| CHB | chr1 | FAM72A  | 202736179 | 0  |
| CHB | chr1 | FAM72A  | 202786179 | 0  |
| CHB | chr1 | FAM72A  | 202836179 | 0  |
| CHB | chr1 | FAM72A  | 202886179 | 0  |
| CHB | chr1 | FAM72A  | 202936179 | 0  |
| CHB | chr1 | FAM72A  | 202986179 | 0  |
| CHB | chr1 | FAM72A  | 203036179 | 17 |

## 3\_Introgression\_data

|     |      |        |           |    |
|-----|------|--------|-----------|----|
| CHB | chr1 | FAM72A | 203086179 | 42 |
| CHB | chr1 | FAM72A | 203136179 | 35 |
| CHB | chr1 | FAM72A | 203186179 | 10 |
| CHB | chr1 | FAM72A | 203236179 | 0  |
| CHB | chr1 | FAM72A | 203286179 | 0  |
| CHB | chr1 | FAM72A | 203336179 | 14 |
| CHB | chr1 | FAM72A | 203386179 | 40 |
| CHB | chr1 | FAM72A | 203436179 | 50 |
| CHB | chr1 | FAM72A | 203486179 | 43 |
| CHB | chr1 | FAM72A | 203536179 | 65 |
| CHB | chr1 | FAM72A | 203586179 | 70 |
| CHB | chr1 | FAM72A | 203636179 | 43 |
| CHB | chr1 | FAM72A | 203686179 | 54 |
| CHB | chr1 | FAM72A | 203736179 | 51 |
| CHB | chr1 | FAM72A | 203786179 | 35 |
| CHB | chr1 | FAM72A | 203836179 | 34 |
| CHB | chr1 | FAM72A | 203886179 | 29 |
| CHB | chr1 | FAM72A | 203936179 | 27 |
| CHB | chr1 | FAM72A | 203986179 | 25 |
| CHB | chr1 | FAM72A | 204036179 | 21 |
| CHB | chr1 | FAM72A | 204086179 | 9  |
| CHB | chr1 | FAM72A | 204136179 | 0  |
| CHB | chr1 | FAM72A | 204186179 | 0  |
| CHB | chr1 | FAM72A | 204236179 | 0  |
| CHB | chr1 | FAM72A | 204286179 | 0  |
| CHB | chr1 | FAM72A | 204336179 | 0  |
| CHB | chr1 | FAM72A | 204386179 | 0  |
| CHB | chr1 | FAM72A | 204436179 | 0  |
| CHB | chr1 | FAM72A | 204486179 | 0  |
| CHB | chr1 | FAM72A | 204536179 | 0  |
| CHB | chr1 | FAM72A | 204586179 | 0  |
| CHB | chr1 | FAM72A | 204636179 | 1  |
| CHB | chr1 | FAM72A | 204686179 | 19 |
| CHB | chr1 | FAM72A | 204736179 | 35 |
| CHB | chr1 | FAM72A | 204786179 | 33 |
| CHB | chr1 | FAM72A | 204836179 | 80 |
| CHB | chr1 | FAM72A | 204886179 | 70 |
| CHB | chr1 | FAM72A | 204936179 | 51 |
| CHB | chr1 | FAM72A | 204986179 | 87 |
| CHB | chr1 | FAM72A | 205036179 | 61 |
| CHB | chr1 | FAM72A | 205086179 | 32 |
| CHB | chr1 | FAM72A | 205136179 | 26 |
| CHB | chr1 | FAM72A | 205186179 | 29 |
| CHB | chr1 | FAM72A | 205236179 | 39 |
| CHB | chr1 | FAM72A | 205286179 | 44 |
| CHB | chr1 | FAM72A | 205336179 | 45 |
| CHB | chr1 | FAM72A | 205386179 | 34 |
| CHB | chr1 | FAM72A | 205436179 | 10 |
| CHB | chr1 | FAM72A | 205486179 | 0  |

## 3\_Introgression\_data

|     |      |        |           |    |
|-----|------|--------|-----------|----|
| CHB | chr1 | FAM72A | 205536179 | 0  |
| CHB | chr1 | FAM72A | 205586179 | 0  |
| CHB | chr1 | FAM72A | 205636179 | 0  |
| CHB | chr1 | FAM72A | 205686179 | 0  |
| CHB | chr1 | FAM72A | 205736179 | 0  |
| CHB | chr1 | FAM72A | 205786179 | 0  |
| CHB | chr1 | FAM72A | 205836179 | 0  |
| CHB | chr1 | FAM72A | 205886179 | 0  |
| CHB | chr1 | FAM72A | 205936179 | 0  |
| CHB | chr1 | FAM72A | 205986179 | 0  |
| CHB | chr1 | FAM72A | 206036179 | 0  |
| CHB | chr1 | FAM72A | 206086179 | 14 |
| CHB | chr1 | FAM72A | 206136179 | 26 |
| CHB | chr1 | FAM72A | 206186179 | 39 |
| CHB | chr1 | FAM72A | 206236179 | 27 |
| CHB | chr1 | FAM72A | 206286179 | 0  |
| CHB | chr1 | FAM72A | 206336179 | 0  |
| CHB | chr1 | FAM72A | 206386179 | 0  |
| CHB | chr1 | FAM72A | 206436179 | 0  |
| CHB | chr1 | FAM72A | 206486179 | 0  |
| CHB | chr1 | FAM72A | 206536179 | 0  |
| CHB | chr1 | FAM72A | 206586179 | 0  |
| CHB | chr1 | FAM72A | 206636179 | 0  |
| CHB | chr1 | FAM72A | 206686179 | 0  |
| CHB | chr1 | FAM72A | 206736179 | 0  |
| CHB | chr1 | FAM72A | 206786179 | 0  |
| CHB | chr1 | FAM72A | 206836179 | 0  |
| CHB | chr1 | FAM72A | 206886179 | 0  |
| CHB | chr1 | FAM72A | 206936179 | 0  |
| CHB | chr1 | FAM72A | 206986179 | 0  |
| CHB | chr1 | FAM72A | 207036179 | 0  |
| CHB | chr1 | FAM72A | 207086179 | 0  |
| CHB | chr1 | FAM72A | 207136179 | 0  |
| CHB | chr1 | FAM72A | 207186179 | 0  |
| CHB | chr1 | FAM72A | 207236179 | 0  |
| CHB | chr1 | FAM72A | 207286179 | 0  |
| CHB | chr1 | FAM72A | 207336179 | 0  |
| CHB | chr1 | FAM72A | 207386179 | 0  |
| CHB | chr1 | FAM72A | 207436179 | 0  |
| CHB | chr1 | FAM72A | 207486179 | 0  |
| CHB | chr1 | FAM72A | 207536179 | 0  |
| CHB | chr1 | FAM72A | 207586179 | 0  |
| CHB | chr1 | FAM72A | 207636179 | 0  |
| CHB | chr1 | FAM72A | 207686179 | 0  |
| CHB | chr1 | FAM72A | 207736179 | 0  |
| CHB | chr1 | FAM72A | 207786179 | 0  |
| CHB | chr1 | FAM72A | 207836179 | 0  |
| CHB | chr1 | FAM72A | 207886179 | 0  |
| CHB | chr1 | FAM72A | 207936179 | 0  |

### 3\_Introgression\_data

|     |      |        |           |     |
|-----|------|--------|-----------|-----|
| CHB | chr1 | FAM72A | 207986179 | 18  |
| CHB | chr1 | FAM72A | 208036179 | 34  |
| CHB | chr1 | FAM72A | 208086179 | 30  |
| CHB | chr1 | FAM72A | 208136179 | 33  |
| CHB | chr1 | FAM72A | 208186179 | 52  |
| CHB | chr1 | FAM72A | 208236179 | 47  |
| CHB | chr1 | FAM72A | 208286179 | 26  |
| CHB | chr1 | FAM72A | 208336179 | 31  |
| CHB | chr1 | FAM72A | 208386179 | 39  |
| CHB | chr1 | FAM72A | 208436179 | 31  |
| CHB | chr1 | FAM72A | 208486179 | 18  |
| CHB | chr1 | FAM72A | 208536179 | 23  |
| CHB | chr1 | FAM72A | 208586179 | 36  |
| CHB | chr1 | FAM72A | 208636179 | 32  |
| CHB | chr1 | FAM72A | 208686179 | 25  |
| CHB | chr1 | FAM72A | 208736179 | 68  |
| CHB | chr1 | FAM72A | 208786179 | 101 |
| CHB | chr1 | FAM72A | 208836179 | 131 |
| CHB | chr1 | FAM72A | 208886179 | 137 |
| CHB | chr1 | FAM72A | 208936179 | 74  |
| CHB | chr1 | FAM72A | 208986179 | 33  |
| CHB | chr1 | FAM72A | 209036179 | 16  |
| CHB | chr1 | FAM72A | 209086179 | 17  |
| CHB | chr1 | FAM72A | 209136179 | 26  |
| CHB | chr1 | FAM72A | 209186179 | 30  |
| CHB | chr1 | FAM72A | 209236179 | 42  |
| CHB | chr1 | FAM72A | 209286179 | 41  |
| CHB | chr1 | FAM72A | 209336179 | 35  |
| CHB | chr1 | FAM72A | 209386179 | 41  |
| CHB | chr1 | FAM72A | 209436179 | 49  |
| CHB | chr1 | FAM72A | 209486179 | 80  |
| CHB | chr1 | FAM72A | 209536179 | 74  |
| CHB | chr1 | FAM72A | 209586179 | 63  |
| CHB | chr1 | FAM72A | 209636179 | 56  |
| CHB | chr1 | FAM72A | 209686179 | 37  |
| CHB | chr1 | FAM72A | 209736179 | 40  |
| CHB | chr1 | FAM72A | 209786179 | 49  |
| CHB | chr1 | FAM72A | 209836179 | 42  |
| CHB | chr1 | FAM72A | 209886179 | 25  |
| CHB | chr1 | FAM72A | 209936179 | 37  |
| CHB | chr1 | FAM72A | 209986179 | 39  |
| CHB | chr1 | FAM72A | 210036179 | 72  |
| CHB | chr1 | FAM72A | 210086179 | 71  |
| CHB | chr1 | FAM72A | 210136179 | 30  |
| CHB | chr1 | FAM72A | 210186179 | 25  |
| CHB | chr1 | FAM72A | 210236179 | 29  |
| CHB | chr1 | FAM72A | 210286179 | 26  |
| CHB | chr1 | FAM72A | 210336179 | 26  |
| CHB | chr1 | FAM72A | 210386179 | 31  |



## 3\_Introgression\_data

|     |      |         |           |    |
|-----|------|---------|-----------|----|
| CHB | chr1 | FAM72A  | 210436179 | 24 |
| CHB | chr1 | FAM72A  | 210486179 | 30 |
| CHB | chr1 | FAM72A  | 210536179 | 39 |
| CHB | chr1 | FAM72A  | 210586179 | 34 |
| CHB | chr1 | FAM72A  | 210636179 | 20 |
| CHB | chr1 | FAM72A  | 210686179 | 7  |
| CHB | chr1 | FAM72A  | 210736179 | 0  |
| CHB | chr1 | FAM72A  | 210786179 | 0  |
| CHB | chr1 | FAM72A  | 210836179 | 0  |
| CHB | chr1 | FAM72A  | 210886179 | 0  |
| CHB | chr1 | FAM72A  | 210936179 | 0  |
| CHB | chr1 | FAM72A  | 210986179 | 0  |
| CHB | chr1 | FAM72A  | 211036179 | 0  |
| CHB | chr1 | FAM72A  | 211086179 | 0  |
| CHB | chr1 | FAM72A  | 211136179 | 0  |
| CHB | chr9 | FAM75A1 | 34405667  | 37 |
| CHB | chr9 | FAM75A1 | 34455667  | 45 |
| CHB | chr9 | FAM75A1 | 34505667  | 30 |
| CHB | chr9 | FAM75A1 | 34555667  | 39 |
| CHB | chr9 | FAM75A1 | 34605667  | 40 |
| CHB | chr9 | FAM75A1 | 34655667  | 36 |
| CHB | chr9 | FAM75A1 | 34705667  | 41 |
| CHB | chr9 | FAM75A1 | 34755667  | 24 |
| CHB | chr9 | FAM75A1 | 34805667  | 6  |
| CHB | chr9 | FAM75A1 | 34855667  | 16 |
| CHB | chr9 | FAM75A1 | 34905667  | 52 |
| CHB | chr9 | FAM75A1 | 34955667  | 49 |
| CHB | chr9 | FAM75A1 | 35005667  | 33 |
| CHB | chr9 | FAM75A1 | 35055667  | 44 |
| CHB | chr9 | FAM75A1 | 35105667  | 28 |
| CHB | chr9 | FAM75A1 | 35155667  | 4  |
| CHB | chr9 | FAM75A1 | 35205667  | 0  |
| CHB | chr9 | FAM75A1 | 35255667  | 0  |
| CHB | chr9 | FAM75A1 | 35305667  | 0  |
| CHB | chr9 | FAM75A1 | 35355667  | 0  |
| CHB | chr9 | FAM75A1 | 35405667  | 0  |
| CHB | chr9 | FAM75A1 | 35455667  | 0  |
| CHB | chr9 | FAM75A1 | 35505667  | 0  |
| CHB | chr9 | FAM75A1 | 35555667  | 0  |
| CHB | chr9 | FAM75A1 | 35605667  | 0  |
| CHB | chr9 | FAM75A1 | 35655667  | 0  |
| CHB | chr9 | FAM75A1 | 35705667  | 0  |
| CHB | chr9 | FAM75A1 | 35755667  | 0  |
| CHB | chr9 | FAM75A1 | 35805667  | 0  |
| CHB | chr9 | FAM75A1 | 35855667  | 0  |
| CHB | chr9 | FAM75A1 | 35905667  | 0  |
| CHB | chr9 | FAM75A1 | 35955667  | 0  |
| CHB | chr9 | FAM75A1 | 36005667  | 0  |
| CHB | chr9 | FAM75A1 | 36055667  | 0  |

## 3\_Introgression\_data

|     |      |         |          |   |
|-----|------|---------|----------|---|
| CHB | chr9 | FAM75A1 | 36105667 | 0 |
| CHB | chr9 | FAM75A1 | 36155667 | 0 |
| CHB | chr9 | FAM75A1 | 36205667 | 0 |
| CHB | chr9 | FAM75A1 | 36255667 | 0 |
| CHB | chr9 | FAM75A1 | 36305667 | 0 |
| CHB | chr9 | FAM75A1 | 36355667 | 0 |
| CHB | chr9 | FAM75A1 | 36405667 | 0 |
| CHB | chr9 | FAM75A1 | 36455667 | 0 |
| CHB | chr9 | FAM75A1 | 36505667 | 0 |
| CHB | chr9 | FAM75A1 | 36555667 | 0 |
| CHB | chr9 | FAM75A1 | 36605667 | 0 |
| CHB | chr9 | FAM75A1 | 36655667 | 0 |
| CHB | chr9 | FAM75A1 | 36705667 | 0 |
| CHB | chr9 | FAM75A1 | 36755667 | 0 |
| CHB | chr9 | FAM75A1 | 36805667 | 0 |
| CHB | chr9 | FAM75A1 | 36855667 | 0 |
| CHB | chr9 | FAM75A1 | 36905667 | 0 |
| CHB | chr9 | FAM75A1 | 36955667 | 0 |
| CHB | chr9 | FAM75A1 | 37005667 | 0 |
| CHB | chr9 | FAM75A1 | 37055667 | 0 |
| CHB | chr9 | FAM75A1 | 37105667 | 0 |
| CHB | chr9 | FAM75A1 | 37155667 | 0 |
| CHB | chr9 | FAM75A1 | 37205667 | 0 |
| CHB | chr9 | FAM75A1 | 37255667 | 0 |
| CHB | chr9 | FAM75A1 | 37305667 | 0 |
| CHB | chr9 | FAM75A1 | 37355667 | 0 |
| CHB | chr9 | FAM75A1 | 37405667 | 0 |
| CHB | chr9 | FAM75A1 | 37455667 | 0 |
| CHB | chr9 | FAM75A1 | 37505667 | 0 |
| CHB | chr9 | FAM75A1 | 37555667 | 0 |
| CHB | chr9 | FAM75A1 | 37605667 | 0 |
| CHB | chr9 | FAM75A1 | 37655667 | 0 |
| CHB | chr9 | FAM75A1 | 37705667 | 0 |
| CHB | chr9 | FAM75A1 | 37755667 | 0 |
| CHB | chr9 | FAM75A1 | 37805667 | 0 |
| CHB | chr9 | FAM75A1 | 37855667 | 0 |
| CHB | chr9 | FAM75A1 | 37905667 | 0 |
| CHB | chr9 | FAM75A1 | 37955667 | 0 |
| CHB | chr9 | FAM75A1 | 38005667 | 0 |
| CHB | chr9 | FAM75A1 | 38055667 | 0 |
| CHB | chr9 | FAM75A1 | 38105667 | 0 |
| CHB | chr9 | FAM75A1 | 38155667 | 0 |
| CHB | chr9 | FAM75A1 | 38205667 | 0 |
| CHB | chr9 | FAM75A1 | 38255667 | 0 |
| CHB | chr9 | FAM75A1 | 38305667 | 0 |
| CHB | chr9 | FAM75A1 | 38355667 | 0 |
| CHB | chr9 | FAM75A1 | 38405667 | 0 |
| CHB | chr9 | FAM75A1 | 38455667 | 0 |
| CHB | chr9 | FAM75A1 | 38505667 | 0 |

3\_Introgression\_data

|     |      |         |          |    |
|-----|------|---------|----------|----|
| CHB | chr9 | FAM75A1 | 38555667 | 0  |
| CHB | chr9 | FAM75A1 | 38605667 | 0  |
| CHB | chr9 | FAM75A1 | 38655667 | 0  |
| CHB | chr9 | FAM75A1 | 38705667 | 0  |
| CHB | chr9 | FAM75A1 | 38755667 | 0  |
| CHB | chr9 | FAM75A1 | 38805667 | 0  |
| CHB | chr9 | FAM75A1 | 38855667 | 0  |
| CHB | chr9 | FAM75A1 | 38905667 | 0  |
| CHB | chr9 | FAM75A1 | 38955667 | 0  |
| CHB | chr9 | FAM75A1 | 39005667 | 0  |
| CHB | chr9 | FAM75A1 | 39055667 | 0  |
| CHB | chr9 | FAM75A1 | 39105667 | 20 |
| CHB | chr9 | FAM75A1 | 39155667 | 26 |
| CHB | chr9 | FAM75A1 | 39205667 | 6  |
| CHB | chr9 | FAM75A1 | 39255667 | 0  |
| CHB | chr9 | FAM75A1 | 39305667 | 0  |
| CHB | chr9 | FAM75A1 | 39355667 | 0  |
| CHB | chr9 | FAM75A1 | 39405667 | 0  |
| CHB | chr9 | FAM75A1 | 39455667 | 0  |
| CHB | chr9 | FAM75A1 | 39505667 | 0  |
| CHB | chr9 | FAM75A1 | 39555667 | 0  |
| CHB | chr9 | FAM75A1 | 39605667 | 0  |
| CHB | chr9 | FAM75A1 | 39655667 | 0  |
| CHB | chr9 | FAM75A1 | 39705667 | 0  |
| CHB | chr9 | FAM75A1 | 39755667 | 0  |
| CHB | chr9 | FAM75A1 | 39805667 | 0  |
| CHB | chr9 | FAM75A1 | 39855667 | 0  |
| CHB | chr9 | FAM75A1 | 39905667 | 0  |
| CHB | chr9 | FAM75A1 | 39955667 | 0  |
| CHB | chr9 | FAM75A1 | 40005667 | 0  |
| CHB | chr9 | FAM75A1 | 40055667 | 0  |
| CHB | chr9 | FAM75A1 | 40105667 | 0  |
| CHB | chr9 | FAM75A1 | 40155667 | 0  |
| CHB | chr9 | FAM75A1 | 40205667 | 0  |
| CHB | chr9 | FAM75A1 | 40255667 | 0  |
| CHB | chr9 | FAM75A1 | 40305667 | 0  |
| CHB | chr9 | FAM75A1 | 40355667 | 0  |
| CHB | chr9 | FAM75A1 | 40405667 | 0  |
| CHB | chr9 | FAM75A1 | 40455667 | 0  |
| CHB | chr9 | FAM75A1 | 40505667 | 0  |
| CHB | chr9 | FAM75A1 | 40555667 | 6  |
| CHB | chr9 | FAM75A1 | 40605667 | 27 |
| CHB | chr9 | FAM75A1 | 40655667 | 21 |
| CHB | chr9 | FAM75A1 | 40705667 | 0  |
| CHB | chr9 | FAM75A1 | 40755667 | 0  |
| CHB | chr9 | FAM75A1 | 40805667 | 0  |
| CHB | chr9 | FAM75A1 | 40855667 | 0  |
| CHB | chr9 | FAM75A1 | 40905667 | 0  |
| CHB | chr9 | FAM75A1 | 40955667 | 0  |

## 3\_Introgression\_data

|     |      |         |          |   |
|-----|------|---------|----------|---|
| CHB | chr9 | FAM75A1 | 41005667 | 0 |
| CHB | chr9 | FAM75A1 | 41055667 | 0 |
| CHB | chr9 | FAM75A1 | 41105667 | 0 |
| CHB | chr9 | FAM75A1 | 41155667 | 0 |
| CHB | chr9 | FAM75A1 | 41205667 | 0 |
| CHB | chr9 | FAM75A1 | 41255667 | 0 |
| CHB | chr9 | FAM75A1 | 41305667 | 0 |
| CHB | chr9 | FAM75A1 | 41355667 | 0 |
| CHB | chr9 | FAM75A1 | 41405667 | 0 |
| CHB | chr9 | FAM75A1 | 41455667 | 0 |
| CHB | chr9 | FAM75A1 | 41505667 | 0 |
| CHB | chr9 | FAM75A1 | 41555667 | 0 |
| CHB | chr9 | FAM75A1 | 41605667 | 0 |
| CHB | chr9 | FAM75A1 | 41655667 | 0 |
| CHB | chr9 | FAM75A1 | 41705667 | 0 |
| CHB | chr9 | FAM75A1 | 41755667 | 0 |
| CHB | chr9 | FAM75A1 | 41805667 | 0 |
| CHB | chr9 | FAM75A1 | 41855667 | 0 |
| CHB | chr9 | FAM75A1 | 41905667 | 0 |
| CHB | chr9 | FAM75A1 | 41955667 | 0 |
| CHB | chr9 | FAM75A1 | 42005667 | 0 |
| CHB | chr9 | FAM75A1 | 42055667 | 0 |
| CHB | chr9 | FAM75A1 | 42105667 | 0 |
| CHB | chr9 | FAM75A1 | 42155667 | 0 |
| CHB | chr9 | FAM75A1 | 42205667 | 0 |
| CHB | chr9 | FAM75A1 | 42255667 | 0 |
| CHB | chr9 | FAM75A1 | 42305667 | 0 |
| CHB | chr9 | FAM75A1 | 42355667 | 0 |
| CHB | chr9 | FAM75A1 | 42405667 | 0 |
| CHB | chr9 | FAM75A1 | 42455667 | 0 |
| CHB | chr9 | FAM75A1 | 42505667 | 0 |
| CHB | chr9 | FAM75A1 | 42555667 | 0 |
| CHB | chr9 | FAM75A1 | 42605667 | 0 |
| CHB | chr9 | FAM75A1 | 42655667 | 0 |
| CHB | chr9 | FAM75A1 | 42705667 | 0 |
| CHB | chr9 | FAM75A1 | 42755667 | 0 |
| CHB | chr9 | FAM75A1 | 42805667 | 0 |
| CHB | chr9 | FAM75A1 | 42855667 | 0 |
| CHB | chr9 | FAM75A1 | 42905667 | 0 |
| CHB | chr9 | FAM75A1 | 42955667 | 0 |
| CHB | chr9 | FAM75A1 | 43005667 | 0 |
| CHB | chr9 | FAM75A1 | 43055667 | 0 |
| CHB | chr9 | FAM75A1 | 43105667 | 0 |
| CHB | chr9 | FAM75A1 | 43155667 | 0 |
| CHB | chr9 | FAM75A1 | 43205667 | 0 |
| CHB | chr9 | FAM75A1 | 43255667 | 0 |
| CHB | chr9 | FAM75A1 | 43305667 | 0 |
| CHB | chr9 | FAM75A1 | 43355667 | 0 |
| CHB | chr9 | FAM75A1 | 43405667 | 0 |

## 3\_Introgression\_data

|     |      |         |          |   |
|-----|------|---------|----------|---|
| CHB | chr9 | FAM75A1 | 43455667 | 0 |
| CHB | chr9 | FAM75A1 | 43505667 | 0 |
| CHB | chr9 | FAM75A1 | 43555667 | 0 |
| CHB | chr9 | FAM75A1 | 43605667 | 0 |
| CHB | chr9 | FAM75A1 | 43655667 | 0 |
| CHB | chr9 | FAM75A1 | 43705667 | 0 |
| CHB | chr9 | FAM75A1 | 43755667 | 0 |
| CHB | chr9 | FAM75A1 | 43805667 | 0 |
| CHB | chr9 | FAM75A1 | 43855667 | 0 |
| CHB | chr9 | FAM75A1 | 43905667 | 0 |
| CHB | chr9 | FAM75A1 | 43955667 | 0 |
| CHB | chr9 | FAM75A1 | 44005667 | 0 |
| CHB | chr9 | FAM75A1 | 44055667 | 0 |
| CHB | chr9 | FAM75A1 | 44105667 | 0 |
| CHB | chr9 | FAM75A1 | 44155667 | 0 |
| CHB | chr9 | FAM75A1 | 44205667 | 0 |
| CHB | chr9 | FAM75A1 | 44255667 | 0 |
| CHB | chr9 | FAM75A1 | 44305667 | 0 |
| CHB | chr9 | FAM75A5 | 55964372 | 0 |
| CHB | chr9 | FAM75A5 | 56014372 | 0 |
| CHB | chr9 | FAM75A5 | 56064372 | 0 |
| CHB | chr9 | FAM75A5 | 56114372 | 0 |
| CHB | chr9 | FAM75A5 | 56164372 | 0 |
| CHB | chr9 | FAM75A5 | 56214372 | 0 |
| CHB | chr9 | FAM75A5 | 56264372 | 0 |
| CHB | chr9 | FAM75A5 | 56314372 | 0 |
| CHB | chr9 | FAM75A5 | 56364372 | 0 |
| CHB | chr9 | FAM75A5 | 56414372 | 0 |
| CHB | chr9 | FAM75A5 | 56464372 | 0 |
| CHB | chr9 | FAM75A5 | 56514372 | 0 |
| CHB | chr9 | FAM75A5 | 56564372 | 0 |
| CHB | chr9 | FAM75A5 | 56614372 | 0 |
| CHB | chr9 | FAM75A5 | 56664372 | 0 |
| CHB | chr9 | FAM75A5 | 56714372 | 0 |
| CHB | chr9 | FAM75A5 | 56764372 | 0 |
| CHB | chr9 | FAM75A5 | 56814372 | 0 |
| CHB | chr9 | FAM75A5 | 56864372 | 0 |
| CHB | chr9 | FAM75A5 | 56914372 | 0 |
| CHB | chr9 | FAM75A5 | 56964372 | 0 |
| CHB | chr9 | FAM75A5 | 57014372 | 0 |
| CHB | chr9 | FAM75A5 | 57064372 | 0 |
| CHB | chr9 | FAM75A5 | 57114372 | 0 |
| CHB | chr9 | FAM75A5 | 57164372 | 0 |
| CHB | chr9 | FAM75A5 | 57214372 | 0 |
| CHB | chr9 | FAM75A5 | 57264372 | 0 |
| CHB | chr9 | FAM75A5 | 57314372 | 0 |
| CHB | chr9 | FAM75A5 | 57364372 | 0 |
| CHB | chr9 | FAM75A5 | 57414372 | 0 |
| CHB | chr9 | FAM75A5 | 57464372 | 0 |

## 3\_Introgression\_data

|     |      |         |          |   |
|-----|------|---------|----------|---|
| CHB | chr9 | FAM75A5 | 57514372 | 0 |
| CHB | chr9 | FAM75A5 | 57564372 | 0 |
| CHB | chr9 | FAM75A5 | 57614372 | 0 |
| CHB | chr9 | FAM75A5 | 57664372 | 0 |
| CHB | chr9 | FAM75A5 | 57714372 | 0 |
| CHB | chr9 | FAM75A5 | 57764372 | 0 |
| CHB | chr9 | FAM75A5 | 57814372 | 0 |
| CHB | chr9 | FAM75A5 | 57864372 | 0 |
| CHB | chr9 | FAM75A5 | 57914372 | 0 |
| CHB | chr9 | FAM75A5 | 57964372 | 0 |
| CHB | chr9 | FAM75A5 | 58014372 | 0 |
| CHB | chr9 | FAM75A5 | 58064372 | 0 |
| CHB | chr9 | FAM75A5 | 58114372 | 0 |
| CHB | chr9 | FAM75A5 | 58164372 | 0 |
| CHB | chr9 | FAM75A5 | 58214372 | 0 |
| CHB | chr9 | FAM75A5 | 58264372 | 0 |
| CHB | chr9 | FAM75A5 | 58314372 | 0 |
| CHB | chr9 | FAM75A5 | 58364372 | 0 |
| CHB | chr9 | FAM75A5 | 58414372 | 0 |
| CHB | chr9 | FAM75A5 | 58464372 | 0 |
| CHB | chr9 | FAM75A5 | 58514372 | 0 |
| CHB | chr9 | FAM75A5 | 58564372 | 0 |
| CHB | chr9 | FAM75A5 | 58614372 | 0 |
| CHB | chr9 | FAM75A5 | 58664372 | 0 |
| CHB | chr9 | FAM75A5 | 58714372 | 0 |
| CHB | chr9 | FAM75A5 | 58764372 | 0 |
| CHB | chr9 | FAM75A5 | 58814372 | 0 |
| CHB | chr9 | FAM75A5 | 58864372 | 0 |
| CHB | chr9 | FAM75A5 | 58914372 | 0 |
| CHB | chr9 | FAM75A5 | 58964372 | 0 |
| CHB | chr9 | FAM75A5 | 59014372 | 0 |
| CHB | chr9 | FAM75A5 | 59064372 | 0 |
| CHB | chr9 | FAM75A5 | 59114372 | 0 |
| CHB | chr9 | FAM75A5 | 59164372 | 0 |
| CHB | chr9 | FAM75A5 | 59214372 | 0 |
| CHB | chr9 | FAM75A5 | 59264372 | 0 |
| CHB | chr9 | FAM75A5 | 59314372 | 0 |
| CHB | chr9 | FAM75A5 | 59364372 | 0 |
| CHB | chr9 | FAM75A5 | 59414372 | 0 |
| CHB | chr9 | FAM75A5 | 59464372 | 0 |
| CHB | chr9 | FAM75A5 | 59514372 | 0 |
| CHB | chr9 | FAM75A5 | 59564372 | 0 |
| CHB | chr9 | FAM75A5 | 59614372 | 0 |
| CHB | chr9 | FAM75A5 | 59664372 | 0 |
| CHB | chr9 | FAM75A5 | 59714372 | 0 |
| CHB | chr9 | FAM75A5 | 59764372 | 0 |
| CHB | chr9 | FAM75A5 | 59814372 | 0 |
| CHB | chr9 | FAM75A5 | 59864372 | 0 |
| CHB | chr9 | FAM75A5 | 59914372 | 0 |

## 3\_Introgression\_data

|     |      |         |          |   |
|-----|------|---------|----------|---|
| CHB | chr9 | FAM75A5 | 59964372 | 0 |
| CHB | chr9 | FAM75A5 | 60014372 | 0 |
| CHB | chr9 | FAM75A5 | 60064372 | 0 |
| CHB | chr9 | FAM75A5 | 60114372 | 0 |
| CHB | chr9 | FAM75A5 | 60164372 | 0 |
| CHB | chr9 | FAM75A5 | 60214372 | 0 |
| CHB | chr9 | FAM75A5 | 60264372 | 0 |
| CHB | chr9 | FAM75A5 | 60314372 | 0 |
| CHB | chr9 | FAM75A5 | 60364372 | 0 |
| CHB | chr9 | FAM75A5 | 60414372 | 0 |
| CHB | chr9 | FAM75A5 | 60464372 | 0 |
| CHB | chr9 | FAM75A5 | 60514372 | 0 |
| CHB | chr9 | FAM75A5 | 60564372 | 0 |
| CHB | chr9 | FAM75A5 | 60614372 | 0 |
| CHB | chr9 | FAM75A5 | 60664372 | 0 |
| CHB | chr9 | FAM75A5 | 60714372 | 0 |
| CHB | chr9 | FAM75A5 | 60764372 | 0 |
| CHB | chr9 | FAM75A5 | 60814372 | 0 |
| CHB | chr9 | FAM75A5 | 60864372 | 0 |
| CHB | chr9 | FAM75A5 | 60914372 | 0 |
| CHB | chr9 | FAM75A5 | 60964372 | 0 |
| CHB | chr9 | FAM75A5 | 61014372 | 0 |
| CHB | chr9 | FAM75A5 | 61064372 | 0 |
| CHB | chr9 | FAM75A5 | 61114372 | 0 |
| CHB | chr9 | FAM75A5 | 61164372 | 0 |
| CHB | chr9 | FAM75A5 | 61214372 | 0 |
| CHB | chr9 | FAM75A5 | 61264372 | 0 |
| CHB | chr9 | FAM75A5 | 61314372 | 0 |
| CHB | chr9 | FAM75A5 | 61364372 | 0 |
| CHB | chr9 | FAM75A5 | 61414372 | 0 |
| CHB | chr9 | FAM75A5 | 61464372 | 0 |
| CHB | chr9 | FAM75A5 | 61514372 | 0 |
| CHB | chr9 | FAM75A5 | 61564372 | 0 |
| CHB | chr9 | FAM75A5 | 61614372 | 0 |
| CHB | chr9 | FAM75A5 | 61664372 | 0 |
| CHB | chr9 | FAM75A5 | 61714372 | 0 |
| CHB | chr9 | FAM75A5 | 61764372 | 0 |
| CHB | chr9 | FAM75A5 | 61814372 | 0 |
| CHB | chr9 | FAM75A5 | 61864372 | 0 |
| CHB | chr9 | FAM75A5 | 61914372 | 0 |
| CHB | chr9 | FAM75A5 | 61964372 | 0 |
| CHB | chr9 | FAM75A5 | 62014372 | 0 |
| CHB | chr9 | FAM75A5 | 62064372 | 0 |
| CHB | chr9 | FAM75A5 | 62114372 | 0 |
| CHB | chr9 | FAM75A5 | 62164372 | 0 |
| CHB | chr9 | FAM75A5 | 62214372 | 0 |
| CHB | chr9 | FAM75A5 | 62264372 | 0 |
| CHB | chr9 | FAM75A5 | 62314372 | 0 |
| CHB | chr9 | FAM75A5 | 62364372 | 0 |

## 3\_Introgression\_data

|     |      |         |          |   |
|-----|------|---------|----------|---|
| CHB | chr9 | FAM75A5 | 62414372 | 0 |
| CHB | chr9 | FAM75A5 | 62464372 | 0 |
| CHB | chr9 | FAM75A5 | 62514372 | 0 |
| CHB | chr9 | FAM75A5 | 62564372 | 0 |
| CHB | chr9 | FAM75A5 | 62614372 | 0 |
| CHB | chr9 | FAM75A5 | 62664372 | 0 |
| CHB | chr9 | FAM75A5 | 62714372 | 0 |
| CHB | chr9 | FAM75A5 | 62764372 | 0 |
| CHB | chr9 | FAM75A5 | 62814372 | 0 |
| CHB | chr9 | FAM75A5 | 62864372 | 0 |
| CHB | chr9 | FAM75A5 | 62914372 | 0 |
| CHB | chr9 | FAM75A5 | 62964372 | 0 |
| CHB | chr9 | FAM75A5 | 63014372 | 0 |
| CHB | chr9 | FAM75A5 | 63064372 | 0 |
| CHB | chr9 | FAM75A5 | 63114372 | 0 |
| CHB | chr9 | FAM75A5 | 63164372 | 0 |
| CHB | chr9 | FAM75A5 | 63214372 | 0 |
| CHB | chr9 | FAM75A5 | 63264372 | 0 |
| CHB | chr9 | FAM75A5 | 63314372 | 0 |
| CHB | chr9 | FAM75A5 | 63364372 | 0 |
| CHB | chr9 | FAM75A5 | 63414372 | 0 |
| CHB | chr9 | FAM75A5 | 63464372 | 0 |
| CHB | chr9 | FAM75A5 | 63514372 | 0 |
| CHB | chr9 | FAM75A5 | 63564372 | 0 |
| CHB | chr9 | FAM75A5 | 63614372 | 0 |
| CHB | chr9 | FAM75A5 | 63664372 | 0 |
| CHB | chr9 | FAM75A5 | 63714372 | 0 |
| CHB | chr9 | FAM75A5 | 63764372 | 0 |
| CHB | chr9 | FAM75A5 | 63814372 | 0 |
| CHB | chr9 | FAM75A5 | 63864372 | 0 |
| CHB | chr9 | FAM75A5 | 63914372 | 0 |
| CHB | chr9 | FAM75A5 | 63964372 | 0 |
| CHB | chr9 | FAM75A5 | 64014372 | 0 |
| CHB | chr9 | FAM75A5 | 64064372 | 0 |
| CHB | chr9 | FAM75A5 | 64114372 | 0 |
| CHB | chr9 | FAM75A5 | 64164372 | 0 |
| CHB | chr9 | FAM75A5 | 64214372 | 0 |
| CHB | chr9 | FAM75A5 | 64264372 | 0 |
| CHB | chr9 | FAM75A5 | 64314372 | 0 |
| CHB | chr9 | FAM75A5 | 64364372 | 0 |
| CHB | chr9 | FAM75A5 | 64414372 | 0 |
| CHB | chr9 | FAM75A5 | 64464372 | 0 |
| CHB | chr9 | FAM75A5 | 64514372 | 0 |
| CHB | chr9 | FAM75A5 | 64564372 | 0 |
| CHB | chr9 | FAM75A5 | 64614372 | 0 |
| CHB | chr9 | FAM75A5 | 64664372 | 0 |
| CHB | chr9 | FAM75A5 | 64714372 | 0 |
| CHB | chr9 | FAM75A5 | 64764372 | 0 |
| CHB | chr9 | FAM75A5 | 64814372 | 0 |



## 3\_Introgression\_data

|     |      |         |          |    |
|-----|------|---------|----------|----|
| CHB | chr9 | FAM75A5 | 64864372 | 0  |
| CHB | chr9 | FAM75A5 | 64914372 | 0  |
| CHB | chr9 | FAM75A5 | 64964372 | 0  |
| CHB | chr9 | FAM75A5 | 65014372 | 0  |
| CHB | chr9 | FAM75A5 | 65064372 | 0  |
| CHB | chr9 | FAM75A5 | 65114372 | 0  |
| CHB | chr9 | FAM75A5 | 65164372 | 0  |
| CHB | chr9 | FAM75A5 | 65214372 | 0  |
| CHB | chr9 | FAM75A5 | 65264372 | 0  |
| CHB | chr9 | FAM75A5 | 65314372 | 0  |
| CHB | chr9 | FAM75A5 | 65364372 | 0  |
| CHB | chr9 | FAM75A5 | 65414372 | 0  |
| CHB | chr9 | FAM75A5 | 65464372 | 0  |
| CHB | chr9 | FAM75A5 | 65514372 | 0  |
| CHB | chr9 | FAM75A5 | 65564372 | 12 |
| CHB | chr9 | FAM75A5 | 65614372 | 26 |
| CHB | chr9 | FAM75A5 | 65664372 | 14 |
| CHB | chr9 | FAM75A5 | 65714372 | 0  |
| CHB | chr9 | FAM75A5 | 65764372 | 0  |
| CHB | chr9 | FAM75A5 | 65814372 | 0  |
| CHB | chr9 | FAM75A5 | 65864372 | 0  |
| CHB | chr9 | FOXD4L2 | 60787146 | 0  |
| CHB | chr9 | FOXD4L2 | 60837146 | 0  |
| CHB | chr9 | FOXD4L2 | 60887146 | 0  |
| CHB | chr9 | FOXD4L2 | 60937146 | 0  |
| CHB | chr9 | FOXD4L2 | 60987146 | 0  |
| CHB | chr9 | FOXD4L2 | 61037146 | 0  |
| CHB | chr9 | FOXD4L2 | 61087146 | 0  |
| CHB | chr9 | FOXD4L2 | 61137146 | 0  |
| CHB | chr9 | FOXD4L2 | 61187146 | 0  |
| CHB | chr9 | FOXD4L2 | 61237146 | 0  |
| CHB | chr9 | FOXD4L2 | 61287146 | 0  |
| CHB | chr9 | FOXD4L2 | 61337146 | 0  |
| CHB | chr9 | FOXD4L2 | 61387146 | 0  |
| CHB | chr9 | FOXD4L2 | 61437146 | 0  |
| CHB | chr9 | FOXD4L2 | 61487146 | 0  |
| CHB | chr9 | FOXD4L2 | 61537146 | 0  |
| CHB | chr9 | FOXD4L2 | 61587146 | 0  |
| CHB | chr9 | FOXD4L2 | 61637146 | 0  |
| CHB | chr9 | FOXD4L2 | 61687146 | 0  |
| CHB | chr9 | FOXD4L2 | 61737146 | 0  |
| CHB | chr9 | FOXD4L2 | 61787146 | 0  |
| CHB | chr9 | FOXD4L2 | 61837146 | 0  |
| CHB | chr9 | FOXD4L2 | 61887146 | 0  |
| CHB | chr9 | FOXD4L2 | 61937146 | 0  |
| CHB | chr9 | FOXD4L2 | 61987146 | 0  |
| CHB | chr9 | FOXD4L2 | 62037146 | 0  |
| CHB | chr9 | FOXD4L2 | 62087146 | 0  |
| CHB | chr9 | FOXD4L2 | 62137146 | 0  |

## 3\_Introgression\_data

|     |      |         |          |   |
|-----|------|---------|----------|---|
| CHB | chr9 | FOXD4L2 | 62187146 | 0 |
| CHB | chr9 | FOXD4L2 | 62237146 | 0 |
| CHB | chr9 | FOXD4L2 | 62287146 | 0 |
| CHB | chr9 | FOXD4L2 | 62337146 | 0 |
| CHB | chr9 | FOXD4L2 | 62387146 | 0 |
| CHB | chr9 | FOXD4L2 | 62437146 | 0 |
| CHB | chr9 | FOXD4L2 | 62487146 | 0 |
| CHB | chr9 | FOXD4L2 | 62537146 | 0 |
| CHB | chr9 | FOXD4L2 | 62587146 | 0 |
| CHB | chr9 | FOXD4L2 | 62637146 | 0 |
| CHB | chr9 | FOXD4L2 | 62687146 | 0 |
| CHB | chr9 | FOXD4L2 | 62737146 | 0 |
| CHB | chr9 | FOXD4L2 | 62787146 | 0 |
| CHB | chr9 | FOXD4L2 | 62837146 | 0 |
| CHB | chr9 | FOXD4L2 | 62887146 | 0 |
| CHB | chr9 | FOXD4L2 | 62937146 | 0 |
| CHB | chr9 | FOXD4L2 | 62987146 | 0 |
| CHB | chr9 | FOXD4L2 | 63037146 | 0 |
| CHB | chr9 | FOXD4L2 | 63087146 | 0 |
| CHB | chr9 | FOXD4L2 | 63137146 | 0 |
| CHB | chr9 | FOXD4L2 | 63187146 | 0 |
| CHB | chr9 | FOXD4L2 | 63237146 | 0 |
| CHB | chr9 | FOXD4L2 | 63287146 | 0 |
| CHB | chr9 | FOXD4L2 | 63337146 | 0 |
| CHB | chr9 | FOXD4L2 | 63387146 | 0 |
| CHB | chr9 | FOXD4L2 | 63437146 | 0 |
| CHB | chr9 | FOXD4L2 | 63487146 | 0 |
| CHB | chr9 | FOXD4L2 | 63537146 | 0 |
| CHB | chr9 | FOXD4L2 | 63587146 | 0 |
| CHB | chr9 | FOXD4L2 | 63637146 | 0 |
| CHB | chr9 | FOXD4L2 | 63687146 | 0 |
| CHB | chr9 | FOXD4L2 | 63737146 | 0 |
| CHB | chr9 | FOXD4L2 | 63787146 | 0 |
| CHB | chr9 | FOXD4L2 | 63837146 | 0 |
| CHB | chr9 | FOXD4L2 | 63887146 | 0 |
| CHB | chr9 | FOXD4L2 | 63937146 | 0 |
| CHB | chr9 | FOXD4L2 | 63987146 | 0 |
| CHB | chr9 | FOXD4L2 | 64037146 | 0 |
| CHB | chr9 | FOXD4L2 | 64087146 | 0 |
| CHB | chr9 | FOXD4L2 | 64137146 | 0 |
| CHB | chr9 | FOXD4L2 | 64187146 | 0 |
| CHB | chr9 | FOXD4L2 | 64237146 | 0 |
| CHB | chr9 | FOXD4L2 | 64287146 | 0 |
| CHB | chr9 | FOXD4L2 | 64337146 | 0 |
| CHB | chr9 | FOXD4L2 | 64387146 | 0 |
| CHB | chr9 | FOXD4L2 | 64437146 | 0 |
| CHB | chr9 | FOXD4L2 | 64487146 | 0 |
| CHB | chr9 | FOXD4L2 | 64537146 | 0 |
| CHB | chr9 | FOXD4L2 | 64587146 | 0 |

## 3\_Introgression\_data

|     |      |         |          |    |
|-----|------|---------|----------|----|
| CHB | chr9 | FOXD4L2 | 64637146 | 0  |
| CHB | chr9 | FOXD4L2 | 64687146 | 0  |
| CHB | chr9 | FOXD4L2 | 64737146 | 0  |
| CHB | chr9 | FOXD4L2 | 64787146 | 0  |
| CHB | chr9 | FOXD4L2 | 64837146 | 0  |
| CHB | chr9 | FOXD4L2 | 64887146 | 0  |
| CHB | chr9 | FOXD4L2 | 64937146 | 0  |
| CHB | chr9 | FOXD4L2 | 64987146 | 0  |
| CHB | chr9 | FOXD4L2 | 65037146 | 0  |
| CHB | chr9 | FOXD4L2 | 65087146 | 0  |
| CHB | chr9 | FOXD4L2 | 65137146 | 0  |
| CHB | chr9 | FOXD4L2 | 65187146 | 0  |
| CHB | chr9 | FOXD4L2 | 65237146 | 0  |
| CHB | chr9 | FOXD4L2 | 65287146 | 0  |
| CHB | chr9 | FOXD4L2 | 65337146 | 0  |
| CHB | chr9 | FOXD4L2 | 65387146 | 0  |
| CHB | chr9 | FOXD4L2 | 65437146 | 0  |
| CHB | chr9 | FOXD4L2 | 65487146 | 0  |
| CHB | chr9 | FOXD4L2 | 65537146 | 0  |
| CHB | chr9 | FOXD4L2 | 65587146 | 25 |
| CHB | chr9 | FOXD4L2 | 65637146 | 26 |
| CHB | chr9 | FOXD4L2 | 65687146 | 1  |
| CHB | chr9 | FOXD4L2 | 65737146 | 0  |
| CHB | chr9 | FOXD4L2 | 65787146 | 0  |
| CHB | chr9 | FOXD4L2 | 65837146 | 0  |
| CHB | chr9 | FOXD4L2 | 65887146 | 0  |
| CHB | chr9 | FOXD4L2 | 65937146 | 0  |
| CHB | chr9 | FOXD4L2 | 65987146 | 0  |
| CHB | chr9 | FOXD4L2 | 66037146 | 0  |
| CHB | chr9 | FOXD4L2 | 66087146 | 0  |
| CHB | chr9 | FOXD4L2 | 66137146 | 0  |
| CHB | chr9 | FOXD4L2 | 66187146 | 0  |
| CHB | chr9 | FOXD4L2 | 66237146 | 0  |
| CHB | chr9 | FOXD4L2 | 66287146 | 0  |
| CHB | chr9 | FOXD4L2 | 66337146 | 0  |
| CHB | chr9 | FOXD4L2 | 66387146 | 0  |
| CHB | chr9 | FOXD4L2 | 66437146 | 0  |
| CHB | chr9 | FOXD4L2 | 66487146 | 0  |
| CHB | chr9 | FOXD4L2 | 66537146 | 0  |
| CHB | chr9 | FOXD4L2 | 66587146 | 0  |
| CHB | chr9 | FOXD4L2 | 66637146 | 12 |
| CHB | chr9 | FOXD4L2 | 66687146 | 21 |
| CHB | chr9 | FOXD4L2 | 66737146 | 17 |
| CHB | chr9 | FOXD4L2 | 66787146 | 21 |
| CHB | chr9 | FOXD4L2 | 66837146 | 13 |
| CHB | chr9 | FOXD4L2 | 66887146 | 0  |
| CHB | chr9 | FOXD4L2 | 66937146 | 0  |
| CHB | chr9 | FOXD4L2 | 66987146 | 0  |
| CHB | chr9 | FOXD4L2 | 67037146 | 0  |

## 3\_Introgression\_data

|     |      |         |          |   |
|-----|------|---------|----------|---|
| CHB | chr9 | FOXD4L2 | 67087146 | 0 |
| CHB | chr9 | FOXD4L2 | 67137146 | 0 |
| CHB | chr9 | FOXD4L2 | 67187146 | 0 |
| CHB | chr9 | FOXD4L2 | 67237146 | 0 |
| CHB | chr9 | FOXD4L2 | 67287146 | 0 |
| CHB | chr9 | FOXD4L2 | 67337146 | 0 |
| CHB | chr9 | FOXD4L2 | 67387146 | 0 |
| CHB | chr9 | FOXD4L2 | 67437146 | 0 |
| CHB | chr9 | FOXD4L2 | 67487146 | 0 |
| CHB | chr9 | FOXD4L2 | 67537146 | 0 |
| CHB | chr9 | FOXD4L2 | 67587146 | 0 |
| CHB | chr9 | FOXD4L2 | 67637146 | 0 |
| CHB | chr9 | FOXD4L2 | 67687146 | 0 |
| CHB | chr9 | FOXD4L2 | 67737146 | 0 |
| CHB | chr9 | FOXD4L2 | 67787146 | 0 |
| CHB | chr9 | FOXD4L2 | 67837146 | 0 |
| CHB | chr9 | FOXD4L2 | 67887146 | 0 |
| CHB | chr9 | FOXD4L2 | 67937146 | 0 |
| CHB | chr9 | FOXD4L2 | 67987146 | 0 |
| CHB | chr9 | FOXD4L2 | 68037146 | 0 |
| CHB | chr9 | FOXD4L2 | 68087146 | 0 |
| CHB | chr9 | FOXD4L2 | 68137146 | 0 |
| CHB | chr9 | FOXD4L2 | 68187146 | 0 |
| CHB | chr9 | FOXD4L2 | 68237146 | 0 |
| CHB | chr9 | FOXD4L2 | 68287146 | 0 |
| CHB | chr9 | FOXD4L2 | 68337146 | 0 |
| CHB | chr9 | FOXD4L2 | 68387146 | 0 |
| CHB | chr9 | FOXD4L2 | 68437146 | 0 |
| CHB | chr9 | FOXD4L2 | 68487146 | 0 |
| CHB | chr9 | FOXD4L2 | 68537146 | 0 |
| CHB | chr9 | FOXD4L2 | 68587146 | 0 |
| CHB | chr9 | FOXD4L2 | 68637146 | 0 |
| CHB | chr9 | FOXD4L2 | 68687146 | 0 |
| CHB | chr9 | FOXD4L2 | 68737146 | 0 |
| CHB | chr9 | FOXD4L2 | 68787146 | 0 |
| CHB | chr9 | FOXD4L2 | 68837146 | 0 |
| CHB | chr9 | FOXD4L2 | 68887146 | 0 |
| CHB | chr9 | FOXD4L2 | 68937146 | 0 |
| CHB | chr9 | FOXD4L2 | 68987146 | 0 |
| CHB | chr9 | FOXD4L2 | 69037146 | 0 |
| CHB | chr9 | FOXD4L2 | 69087146 | 0 |
| CHB | chr9 | FOXD4L2 | 69137146 | 0 |
| CHB | chr9 | FOXD4L2 | 69187146 | 0 |
| CHB | chr9 | FOXD4L2 | 69237146 | 0 |
| CHB | chr9 | FOXD4L2 | 69287146 | 0 |
| CHB | chr9 | FOXD4L2 | 69337146 | 0 |
| CHB | chr9 | FOXD4L2 | 69387146 | 0 |
| CHB | chr9 | FOXD4L2 | 69437146 | 0 |
| CHB | chr9 | FOXD4L2 | 69487146 | 0 |

## 3\_Introgression\_data

|     |       |          |          |    |
|-----|-------|----------|----------|----|
| CHB | chr9  | FOXD4L2  | 69537146 | 0  |
| CHB | chr9  | FOXD4L2  | 69587146 | 0  |
| CHB | chr9  | FOXD4L2  | 69637146 | 0  |
| CHB | chr9  | FOXD4L2  | 69687146 | 0  |
| CHB | chr9  | FOXD4L2  | 69737146 | 0  |
| CHB | chr9  | FOXD4L2  | 69787146 | 6  |
| CHB | chr9  | FOXD4L2  | 69837146 | 35 |
| CHB | chr9  | FOXD4L2  | 69887146 | 61 |
| CHB | chr9  | FOXD4L2  | 69937146 | 90 |
| CHB | chr9  | FOXD4L2  | 69987146 | 70 |
| CHB | chr9  | FOXD4L2  | 70037146 | 12 |
| CHB | chr9  | FOXD4L2  | 70087146 | 0  |
| CHB | chr9  | FOXD4L2  | 70137146 | 0  |
| CHB | chr9  | FOXD4L2  | 70187146 | 0  |
| CHB | chr9  | FOXD4L2  | 70237146 | 0  |
| CHB | chr9  | FOXD4L2  | 70287146 | 0  |
| CHB | chr9  | FOXD4L2  | 70337146 | 0  |
| CHB | chr9  | FOXD4L2  | 70387146 | 0  |
| CHB | chr9  | FOXD4L2  | 70437146 | 0  |
| CHB | chr9  | FOXD4L2  | 70487146 | 0  |
| CHB | chr9  | FOXD4L2  | 70537146 | 0  |
| CHB | chr9  | FOXD4L2  | 70587146 | 0  |
| CHB | chr9  | FOXD4L2  | 70637146 | 0  |
| CHB | chr9  | FOXD4L2  | 70687146 | 0  |
| CHB | chr15 | GOLGA6L9 | 77479363 | 0  |
| CHB | chr15 | GOLGA6L9 | 77529363 | 0  |
| CHB | chr15 | GOLGA6L9 | 77579363 | 0  |
| CHB | chr15 | GOLGA6L9 | 77629363 | 0  |
| CHB | chr15 | GOLGA6L9 | 77679363 | 0  |
| CHB | chr15 | GOLGA6L9 | 77729363 | 0  |
| CHB | chr15 | GOLGA6L9 | 77779363 | 0  |
| CHB | chr15 | GOLGA6L9 | 77829363 | 0  |
| CHB | chr15 | GOLGA6L9 | 77879363 | 0  |
| CHB | chr15 | GOLGA6L9 | 77929363 | 0  |
| CHB | chr15 | GOLGA6L9 | 77979363 | 0  |
| CHB | chr15 | GOLGA6L9 | 78029363 | 0  |
| CHB | chr15 | GOLGA6L9 | 78079363 | 0  |
| CHB | chr15 | GOLGA6L9 | 78129363 | 0  |
| CHB | chr15 | GOLGA6L9 | 78179363 | 0  |
| CHB | chr15 | GOLGA6L9 | 78229363 | 0  |
| CHB | chr15 | GOLGA6L9 | 78279363 | 0  |
| CHB | chr15 | GOLGA6L9 | 78329363 | 0  |
| CHB | chr15 | GOLGA6L9 | 78379363 | 0  |
| CHB | chr15 | GOLGA6L9 | 78429363 | 0  |
| CHB | chr15 | GOLGA6L9 | 78479363 | 0  |
| CHB | chr15 | GOLGA6L9 | 78529363 | 0  |
| CHB | chr15 | GOLGA6L9 | 78579363 | 0  |
| CHB | chr15 | GOLGA6L9 | 78629363 | 19 |
| CHB | chr15 | GOLGA6L9 | 78679363 | 40 |

### 3\_Introgression\_data

|     |       |          |          |     |
|-----|-------|----------|----------|-----|
| CHB | chr15 | GOLGA6L9 | 78729363 | 31  |
| CHB | chr15 | GOLGA6L9 | 78779363 | 28  |
| CHB | chr15 | GOLGA6L9 | 78829363 | 28  |
| CHB | chr15 | GOLGA6L9 | 78879363 | 25  |
| CHB | chr15 | GOLGA6L9 | 78929363 | 33  |
| CHB | chr15 | GOLGA6L9 | 78979363 | 30  |
| CHB | chr15 | GOLGA6L9 | 79029363 | 37  |
| CHB | chr15 | GOLGA6L9 | 79079363 | 45  |
| CHB | chr15 | GOLGA6L9 | 79129363 | 34  |
| CHB | chr15 | GOLGA6L9 | 79179363 | 14  |
| CHB | chr15 | GOLGA6L9 | 79229363 | 0   |
| CHB | chr15 | GOLGA6L9 | 79279363 | 0   |
| CHB | chr15 | GOLGA6L9 | 79329363 | 0   |
| CHB | chr15 | GOLGA6L9 | 79379363 | 0   |
| CHB | chr15 | GOLGA6L9 | 79429363 | 0   |
| CHB | chr15 | GOLGA6L9 | 79479363 | 0   |
| CHB | chr15 | GOLGA6L9 | 79529363 | 49  |
| CHB | chr15 | GOLGA6L9 | 79579363 | 101 |
| CHB | chr15 | GOLGA6L9 | 79629363 | 68  |
| CHB | chr15 | GOLGA6L9 | 79679363 | 36  |
| CHB | chr15 | GOLGA6L9 | 79729363 | 73  |
| CHB | chr15 | GOLGA6L9 | 79779363 | 87  |
| CHB | chr15 | GOLGA6L9 | 79829363 | 55  |
| CHB | chr15 | GOLGA6L9 | 79879363 | 44  |
| CHB | chr15 | GOLGA6L9 | 79929363 | 41  |
| CHB | chr15 | GOLGA6L9 | 79979363 | 64  |
| CHB | chr15 | GOLGA6L9 | 80029363 | 59  |
| CHB | chr15 | GOLGA6L9 | 80079363 | 36  |
| CHB | chr15 | GOLGA6L9 | 80129363 | 40  |
| CHB | chr15 | GOLGA6L9 | 80179363 | 38  |
| CHB | chr15 | GOLGA6L9 | 80229363 | 35  |
| CHB | chr15 | GOLGA6L9 | 80279363 | 27  |
| CHB | chr15 | GOLGA6L9 | 80329363 | 13  |
| CHB | chr15 | GOLGA6L9 | 80379363 | 0   |
| CHB | chr15 | GOLGA6L9 | 80429363 | 0   |
| CHB | chr15 | GOLGA6L9 | 80479363 | 0   |
| CHB | chr15 | GOLGA6L9 | 80529363 | 0   |
| CHB | chr15 | GOLGA6L9 | 80579363 | 0   |
| CHB | chr15 | GOLGA6L9 | 80629363 | 0   |
| CHB | chr15 | GOLGA6L9 | 80679363 | 0   |
| CHB | chr15 | GOLGA6L9 | 80729363 | 0   |
| CHB | chr15 | GOLGA6L9 | 80779363 | 0   |
| CHB | chr15 | GOLGA6L9 | 80829363 | 0   |
| CHB | chr15 | GOLGA6L9 | 80879363 | 0   |
| CHB | chr15 | GOLGA6L9 | 80929363 | 0   |
| CHB | chr15 | GOLGA6L9 | 80979363 | 0   |
| CHB | chr15 | GOLGA6L9 | 81029363 | 0   |
| CHB | chr15 | GOLGA6L9 | 81079363 | 0   |
| CHB | chr15 | GOLGA6L9 | 81129363 | 0   |

## 3\_Introgression\_data

|     |       |          |          |   |
|-----|-------|----------|----------|---|
| CHB | chr15 | GOLGA6L9 | 81179363 | 0 |
| CHB | chr15 | GOLGA6L9 | 81229363 | 0 |
| CHB | chr15 | GOLGA6L9 | 81279363 | 0 |
| CHB | chr15 | GOLGA6L9 | 81329363 | 0 |
| CHB | chr15 | GOLGA6L9 | 81379363 | 0 |
| CHB | chr15 | GOLGA6L9 | 81429363 | 0 |
| CHB | chr15 | GOLGA6L9 | 81479363 | 0 |
| CHB | chr15 | GOLGA6L9 | 81529363 | 0 |
| CHB | chr15 | GOLGA6L9 | 81579363 | 0 |
| CHB | chr15 | GOLGA6L9 | 81629363 | 0 |
| CHB | chr15 | GOLGA6L9 | 81679363 | 0 |
| CHB | chr15 | GOLGA6L9 | 81729363 | 0 |
| CHB | chr15 | GOLGA6L9 | 81779363 | 0 |
| CHB | chr15 | GOLGA6L9 | 81829363 | 0 |
| CHB | chr15 | GOLGA6L9 | 81879363 | 0 |
| CHB | chr15 | GOLGA6L9 | 81929363 | 0 |
| CHB | chr15 | GOLGA6L9 | 81979363 | 0 |
| CHB | chr15 | GOLGA6L9 | 82029363 | 0 |
| CHB | chr15 | GOLGA6L9 | 82079363 | 0 |
| CHB | chr15 | GOLGA6L9 | 82129363 | 0 |
| CHB | chr15 | GOLGA6L9 | 82179363 | 0 |
| CHB | chr15 | GOLGA6L9 | 82229363 | 0 |
| CHB | chr15 | GOLGA6L9 | 82279363 | 0 |
| CHB | chr15 | GOLGA6L9 | 82329363 | 0 |
| CHB | chr15 | GOLGA6L9 | 82379363 | 0 |
| CHB | chr15 | GOLGA6L9 | 82429363 | 0 |
| CHB | chr15 | GOLGA6L9 | 82479363 | 0 |
| CHB | chr15 | GOLGA6L9 | 82529363 | 0 |
| CHB | chr15 | GOLGA6L9 | 82579363 | 0 |
| CHB | chr15 | GOLGA6L9 | 82629363 | 0 |
| CHB | chr15 | GOLGA6L9 | 82679363 | 0 |
| CHB | chr15 | GOLGA6L9 | 82729363 | 0 |
| CHB | chr15 | GOLGA6L9 | 82779363 | 0 |
| CHB | chr15 | GOLGA6L9 | 82829363 | 0 |
| CHB | chr15 | GOLGA6L9 | 82879363 | 0 |
| CHB | chr15 | GOLGA6L9 | 82929363 | 0 |
| CHB | chr15 | GOLGA6L9 | 82979363 | 0 |
| CHB | chr15 | GOLGA6L9 | 83029363 | 0 |
| CHB | chr15 | GOLGA6L9 | 83079363 | 0 |
| CHB | chr15 | GOLGA6L9 | 83129363 | 0 |
| CHB | chr15 | GOLGA6L9 | 83179363 | 0 |
| CHB | chr15 | GOLGA6L9 | 83229363 | 0 |
| CHB | chr15 | GOLGA6L9 | 83279363 | 0 |
| CHB | chr15 | GOLGA6L9 | 83329363 | 0 |
| CHB | chr15 | GOLGA6L9 | 83379363 | 0 |
| CHB | chr15 | GOLGA6L9 | 83429363 | 0 |
| CHB | chr15 | GOLGA6L9 | 83479363 | 0 |
| CHB | chr15 | GOLGA6L9 | 83529363 | 0 |
| CHB | chr15 | GOLGA6L9 | 83579363 | 0 |

## 3\_Introgression\_data

|     |       |          |          |    |
|-----|-------|----------|----------|----|
| CHB | chr15 | GOLGA6L9 | 83629363 | 0  |
| CHB | chr15 | GOLGA6L9 | 83679363 | 0  |
| CHB | chr15 | GOLGA6L9 | 83729363 | 0  |
| CHB | chr15 | GOLGA6L9 | 83779363 | 0  |
| CHB | chr15 | GOLGA6L9 | 83829363 | 0  |
| CHB | chr15 | GOLGA6L9 | 83879363 | 0  |
| CHB | chr15 | GOLGA6L9 | 83929363 | 0  |
| CHB | chr15 | GOLGA6L9 | 83979363 | 0  |
| CHB | chr15 | GOLGA6L9 | 84029363 | 0  |
| CHB | chr15 | GOLGA6L9 | 84079363 | 0  |
| CHB | chr15 | GOLGA6L9 | 84129363 | 0  |
| CHB | chr15 | GOLGA6L9 | 84179363 | 0  |
| CHB | chr15 | GOLGA6L9 | 84229363 | 7  |
| CHB | chr15 | GOLGA6L9 | 84279363 | 20 |
| CHB | chr15 | GOLGA6L9 | 84329363 | 25 |
| CHB | chr15 | GOLGA6L9 | 84379363 | 31 |
| CHB | chr15 | GOLGA6L9 | 84429363 | 32 |
| CHB | chr15 | GOLGA6L9 | 84479363 | 27 |
| CHB | chr15 | GOLGA6L9 | 84529363 | 37 |
| CHB | chr15 | GOLGA6L9 | 84579363 | 45 |
| CHB | chr15 | GOLGA6L9 | 84629363 | 34 |
| CHB | chr15 | GOLGA6L9 | 84679363 | 25 |
| CHB | chr15 | GOLGA6L9 | 84729363 | 30 |
| CHB | chr15 | GOLGA6L9 | 84779363 | 28 |
| CHB | chr15 | GOLGA6L9 | 84829363 | 11 |
| CHB | chr15 | GOLGA6L9 | 84879363 | 0  |
| CHB | chr15 | GOLGA6L9 | 84929363 | 0  |
| CHB | chr15 | GOLGA6L9 | 84979363 | 0  |
| CHB | chr15 | GOLGA6L9 | 85029363 | 4  |
| CHB | chr15 | GOLGA6L9 | 85079363 | 28 |
| CHB | chr15 | GOLGA6L9 | 85129363 | 43 |
| CHB | chr15 | GOLGA6L9 | 85179363 | 39 |
| CHB | chr15 | GOLGA6L9 | 85229363 | 32 |
| CHB | chr15 | GOLGA6L9 | 85279363 | 33 |
| CHB | chr15 | GOLGA6L9 | 85329363 | 33 |
| CHB | chr15 | GOLGA6L9 | 85379363 | 27 |
| CHB | chr15 | GOLGA6L9 | 85429363 | 49 |
| CHB | chr15 | GOLGA6L9 | 85479363 | 59 |
| CHB | chr15 | GOLGA6L9 | 85529363 | 45 |
| CHB | chr15 | GOLGA6L9 | 85579363 | 44 |
| CHB | chr15 | GOLGA6L9 | 85629363 | 48 |
| CHB | chr15 | GOLGA6L9 | 85679363 | 29 |
| CHB | chr15 | GOLGA6L9 | 85729363 | 5  |
| CHB | chr15 | GOLGA6L9 | 85779363 | 0  |
| CHB | chr15 | GOLGA6L9 | 85829363 | 0  |
| CHB | chr15 | GOLGA6L9 | 85879363 | 0  |
| CHB | chr15 | GOLGA6L9 | 85929363 | 0  |
| CHB | chr15 | GOLGA6L9 | 85979363 | 0  |
| CHB | chr15 | GOLGA6L9 | 86029363 | 0  |



## 3\_Introgression\_data

|     |       |          |          |     |
|-----|-------|----------|----------|-----|
| CHB | chr15 | GOLGA6L9 | 86079363 | 0   |
| CHB | chr15 | GOLGA6L9 | 86129363 | 0   |
| CHB | chr15 | GOLGA6L9 | 86179363 | 0   |
| CHB | chr15 | GOLGA6L9 | 86229363 | 0   |
| CHB | chr15 | GOLGA6L9 | 86279363 | 0   |
| CHB | chr15 | GOLGA6L9 | 86329363 | 0   |
| CHB | chr15 | GOLGA6L9 | 86379363 | 0   |
| CHB | chr15 | GOLGA6L9 | 86429363 | 0   |
| CHB | chr15 | GOLGA6L9 | 86479363 | 0   |
| CHB | chr15 | GOLGA6L9 | 86529363 | 0   |
| CHB | chr15 | GOLGA6L9 | 86579363 | 0   |
| CHB | chr15 | GOLGA6L9 | 86629363 | 16  |
| CHB | chr15 | GOLGA6L9 | 86679363 | 37  |
| CHB | chr15 | GOLGA6L9 | 86729363 | 47  |
| CHB | chr15 | GOLGA6L9 | 86779363 | 41  |
| CHB | chr15 | GOLGA6L9 | 86829363 | 24  |
| CHB | chr15 | GOLGA6L9 | 86879363 | 25  |
| CHB | chr15 | GOLGA6L9 | 86929363 | 26  |
| CHB | chr15 | GOLGA6L9 | 86979363 | 45  |
| CHB | chr15 | GOLGA6L9 | 87029363 | 44  |
| CHB | chr15 | GOLGA6L9 | 87079363 | 22  |
| CHB | chr15 | GOLGA6L9 | 87129363 | 41  |
| CHB | chr15 | GOLGA6L9 | 87179363 | 63  |
| CHB | chr15 | GOLGA6L9 | 87229363 | 135 |
| CHB | chr15 | GOLGA6L9 | 87279363 | 119 |
| CHB | chr15 | GOLGA6L9 | 87329363 | 32  |
| CHB | chr15 | GOLGA6L9 | 87379363 | 24  |
| CHB | chr15 | GOLGA8G  | 23569611 | 0   |
| CHB | chr15 | GOLGA8G  | 23619611 | 0   |
| CHB | chr15 | GOLGA8G  | 23669611 | 0   |
| CHB | chr15 | GOLGA8G  | 23719611 | 0   |
| CHB | chr15 | GOLGA8G  | 23769611 | 0   |
| CHB | chr15 | GOLGA8G  | 23819611 | 0   |
| CHB | chr15 | GOLGA8G  | 23869611 | 0   |
| CHB | chr15 | GOLGA8G  | 23919611 | 0   |
| CHB | chr15 | GOLGA8G  | 23969611 | 0   |
| CHB | chr15 | GOLGA8G  | 24019611 | 0   |
| CHB | chr15 | GOLGA8G  | 24069611 | 0   |
| CHB | chr15 | GOLGA8G  | 24119611 | 0   |
| CHB | chr15 | GOLGA8G  | 24169611 | 0   |
| CHB | chr15 | GOLGA8G  | 24219611 | 0   |
| CHB | chr15 | GOLGA8G  | 24269611 | 0   |
| CHB | chr15 | GOLGA8G  | 24319611 | 0   |
| CHB | chr15 | GOLGA8G  | 24369611 | 0   |
| CHB | chr15 | GOLGA8G  | 24419611 | 0   |
| CHB | chr15 | GOLGA8G  | 24469611 | 0   |
| CHB | chr15 | GOLGA8G  | 24519611 | 0   |
| CHB | chr15 | GOLGA8G  | 24569611 | 0   |
| CHB | chr15 | GOLGA8G  | 24619611 | 0   |

## 3\_Introgression\_data

|     |       |         |          |    |
|-----|-------|---------|----------|----|
| CHB | chr15 | GOLGA8G | 24669611 | 0  |
| CHB | chr15 | GOLGA8G | 24719611 | 0  |
| CHB | chr15 | GOLGA8G | 24769611 | 0  |
| CHB | chr15 | GOLGA8G | 24819611 | 0  |
| CHB | chr15 | GOLGA8G | 24869611 | 0  |
| CHB | chr15 | GOLGA8G | 24919611 | 0  |
| CHB | chr15 | GOLGA8G | 24969611 | 31 |
| CHB | chr15 | GOLGA8G | 25019611 | 58 |
| CHB | chr15 | GOLGA8G | 25069611 | 39 |
| CHB | chr15 | GOLGA8G | 25119611 | 27 |
| CHB | chr15 | GOLGA8G | 25169611 | 15 |
| CHB | chr15 | GOLGA8G | 25219611 | 0  |
| CHB | chr15 | GOLGA8G | 25269611 | 0  |
| CHB | chr15 | GOLGA8G | 25319611 | 0  |
| CHB | chr15 | GOLGA8G | 25369611 | 0  |
| CHB | chr15 | GOLGA8G | 25419611 | 0  |
| CHB | chr15 | GOLGA8G | 25469611 | 0  |
| CHB | chr15 | GOLGA8G | 25519611 | 0  |
| CHB | chr15 | GOLGA8G | 25569611 | 0  |
| CHB | chr15 | GOLGA8G | 25619611 | 0  |
| CHB | chr15 | GOLGA8G | 25669611 | 0  |
| CHB | chr15 | GOLGA8G | 25719611 | 0  |
| CHB | chr15 | GOLGA8G | 25769611 | 0  |
| CHB | chr15 | GOLGA8G | 25819611 | 0  |
| CHB | chr15 | GOLGA8G | 25869611 | 0  |
| CHB | chr15 | GOLGA8G | 25919611 | 0  |
| CHB | chr15 | GOLGA8G | 25969611 | 0  |
| CHB | chr15 | GOLGA8G | 26019611 | 0  |
| CHB | chr15 | GOLGA8G | 26069611 | 0  |
| CHB | chr15 | GOLGA8G | 26119611 | 0  |
| CHB | chr15 | GOLGA8G | 26169611 | 0  |
| CHB | chr15 | GOLGA8G | 26219611 | 51 |
| CHB | chr15 | GOLGA8G | 26269611 | 53 |
| CHB | chr15 | GOLGA8G | 26319611 | 2  |
| CHB | chr15 | GOLGA8G | 26369611 | 0  |
| CHB | chr15 | GOLGA8G | 26419611 | 0  |
| CHB | chr15 | GOLGA8G | 26469611 | 0  |
| CHB | chr15 | GOLGA8G | 26519611 | 0  |
| CHB | chr15 | GOLGA8G | 26569611 | 0  |
| CHB | chr15 | GOLGA8G | 26619611 | 0  |
| CHB | chr15 | GOLGA8G | 26669611 | 5  |
| CHB | chr15 | GOLGA8G | 26719611 | 44 |
| CHB | chr15 | GOLGA8G | 26769611 | 46 |
| CHB | chr15 | GOLGA8G | 26819611 | 14 |
| CHB | chr15 | GOLGA8G | 26869611 | 9  |
| CHB | chr15 | GOLGA8G | 26919611 | 2  |
| CHB | chr15 | GOLGA8G | 26969611 | 0  |
| CHB | chr15 | GOLGA8G | 27019611 | 0  |
| CHB | chr15 | GOLGA8G | 27069611 | 18 |

## 3\_Introgression\_data

|     |       |         |          |    |
|-----|-------|---------|----------|----|
| CHB | chr15 | GOLGA8G | 27119611 | 32 |
| CHB | chr15 | GOLGA8G | 27169611 | 32 |
| CHB | chr15 | GOLGA8G | 27219611 | 26 |
| CHB | chr15 | GOLGA8G | 27269611 | 8  |
| CHB | chr15 | GOLGA8G | 27319611 | 0  |
| CHB | chr15 | GOLGA8G | 27369611 | 0  |
| CHB | chr15 | GOLGA8G | 27419611 | 0  |
| CHB | chr15 | GOLGA8G | 27469611 | 0  |
| CHB | chr15 | GOLGA8G | 27519611 | 0  |
| CHB | chr15 | GOLGA8G | 27569611 | 0  |
| CHB | chr15 | GOLGA8G | 27619611 | 0  |
| CHB | chr15 | GOLGA8G | 27669611 | 0  |
| CHB | chr15 | GOLGA8G | 27719611 | 0  |
| CHB | chr15 | GOLGA8G | 27769611 | 0  |
| CHB | chr15 | GOLGA8G | 27819611 | 0  |
| CHB | chr15 | GOLGA8G | 27869611 | 0  |
| CHB | chr15 | GOLGA8G | 27919611 | 0  |
| CHB | chr15 | GOLGA8G | 27969611 | 0  |
| CHB | chr15 | GOLGA8G | 28019611 | 0  |
| CHB | chr15 | GOLGA8G | 28069611 | 0  |
| CHB | chr15 | GOLGA8G | 28119611 | 0  |
| CHB | chr15 | GOLGA8G | 28169611 | 0  |
| CHB | chr15 | GOLGA8G | 28219611 | 2  |
| CHB | chr15 | GOLGA8G | 28269611 | 19 |
| CHB | chr15 | GOLGA8G | 28319611 | 40 |
| CHB | chr15 | GOLGA8G | 28369611 | 23 |
| CHB | chr15 | GOLGA8G | 28419611 | 0  |
| CHB | chr15 | GOLGA8G | 28469611 | 0  |
| CHB | chr15 | GOLGA8G | 28519611 | 0  |
| CHB | chr15 | GOLGA8G | 28569611 | 0  |
| CHB | chr15 | GOLGA8G | 28619611 | 0  |
| CHB | chr15 | GOLGA8G | 28669611 | 0  |
| CHB | chr15 | GOLGA8G | 28719611 | 0  |
| CHB | chr15 | GOLGA8G | 28769611 | 0  |
| CHB | chr15 | GOLGA8G | 28819611 | 0  |
| CHB | chr15 | GOLGA8G | 28869611 | 0  |
| CHB | chr15 | GOLGA8G | 28919611 | 10 |
| CHB | chr15 | GOLGA8G | 28969611 | 32 |
| CHB | chr15 | GOLGA8G | 29019611 | 37 |
| CHB | chr15 | GOLGA8G | 29069611 | 15 |
| CHB | chr15 | GOLGA8G | 29119611 | 0  |
| CHB | chr15 | GOLGA8G | 29169611 | 0  |
| CHB | chr15 | GOLGA8G | 29219611 | 0  |
| CHB | chr15 | GOLGA8G | 29269611 | 0  |
| CHB | chr15 | GOLGA8G | 29319611 | 0  |
| CHB | chr15 | GOLGA8G | 29369611 | 0  |
| CHB | chr15 | GOLGA8G | 29419611 | 0  |
| CHB | chr15 | GOLGA8G | 29469611 | 0  |
| CHB | chr15 | GOLGA8G | 29519611 | 0  |

## 3\_Introgression\_data

|     |       |         |          |    |
|-----|-------|---------|----------|----|
| CHB | chr15 | GOLGA8G | 29569611 | 0  |
| CHB | chr15 | GOLGA8G | 29619611 | 0  |
| CHB | chr15 | GOLGA8G | 29669611 | 0  |
| CHB | chr15 | GOLGA8G | 29719611 | 0  |
| CHB | chr15 | GOLGA8G | 29769611 | 0  |
| CHB | chr15 | GOLGA8G | 29819611 | 0  |
| CHB | chr15 | GOLGA8G | 29869611 | 0  |
| CHB | chr15 | GOLGA8G | 29919611 | 0  |
| CHB | chr15 | GOLGA8G | 29969611 | 31 |
| CHB | chr15 | GOLGA8G | 30019611 | 39 |
| CHB | chr15 | GOLGA8G | 30069611 | 27 |
| CHB | chr15 | GOLGA8G | 30119611 | 23 |
| CHB | chr15 | GOLGA8G | 30169611 | 4  |
| CHB | chr15 | GOLGA8G | 30219611 | 0  |
| CHB | chr15 | GOLGA8G | 30269611 | 0  |
| CHB | chr15 | GOLGA8G | 30319611 | 0  |
| CHB | chr15 | GOLGA8G | 30369611 | 0  |
| CHB | chr15 | GOLGA8G | 30419611 | 0  |
| CHB | chr15 | GOLGA8G | 30469611 | 0  |
| CHB | chr15 | GOLGA8G | 30519611 | 0  |
| CHB | chr15 | GOLGA8G | 30569611 | 0  |
| CHB | chr15 | GOLGA8G | 30619611 | 0  |
| CHB | chr15 | GOLGA8G | 30669611 | 0  |
| CHB | chr15 | GOLGA8G | 30719611 | 0  |
| CHB | chr15 | GOLGA8G | 30769611 | 0  |
| CHB | chr15 | GOLGA8G | 30819611 | 0  |
| CHB | chr15 | GOLGA8G | 30869611 | 0  |
| CHB | chr15 | GOLGA8G | 30919611 | 0  |
| CHB | chr15 | GOLGA8G | 30969611 | 0  |
| CHB | chr15 | GOLGA8G | 31019611 | 0  |
| CHB | chr15 | GOLGA8G | 31069611 | 0  |
| CHB | chr15 | GOLGA8G | 31119611 | 0  |
| CHB | chr15 | GOLGA8G | 31169611 | 0  |
| CHB | chr15 | GOLGA8G | 31219611 | 0  |
| CHB | chr15 | GOLGA8G | 31269611 | 0  |
| CHB | chr15 | GOLGA8G | 31319611 | 0  |
| CHB | chr15 | GOLGA8G | 31369611 | 0  |
| CHB | chr15 | GOLGA8G | 31419611 | 0  |
| CHB | chr15 | GOLGA8G | 31469611 | 0  |
| CHB | chr15 | GOLGA8G | 31519611 | 0  |
| CHB | chr15 | GOLGA8G | 31569611 | 0  |
| CHB | chr15 | GOLGA8G | 31619611 | 0  |
| CHB | chr15 | GOLGA8G | 31669611 | 0  |
| CHB | chr15 | GOLGA8G | 31719611 | 0  |
| CHB | chr15 | GOLGA8G | 31769611 | 0  |
| CHB | chr15 | GOLGA8G | 31819611 | 0  |
| CHB | chr15 | GOLGA8G | 31869611 | 0  |
| CHB | chr15 | GOLGA8G | 31919611 | 0  |
| CHB | chr15 | GOLGA8G | 31969611 | 0  |

## 3\_Introgression\_data

|     |       |         |           |   |
|-----|-------|---------|-----------|---|
| CHB | chr15 | GOLGA8G | 32019611  | 0 |
| CHB | chr15 | GOLGA8G | 32069611  | 0 |
| CHB | chr15 | GOLGA8G | 32119611  | 0 |
| CHB | chr15 | GOLGA8G | 32169611  | 0 |
| CHB | chr15 | GOLGA8G | 32219611  | 0 |
| CHB | chr15 | GOLGA8G | 32269611  | 0 |
| CHB | chr15 | GOLGA8G | 32319611  | 0 |
| CHB | chr15 | GOLGA8G | 32369611  | 0 |
| CHB | chr15 | GOLGA8G | 32419611  | 0 |
| CHB | chr15 | GOLGA8G | 32469611  | 0 |
| CHB | chr15 | GOLGA8G | 32519611  | 0 |
| CHB | chr15 | GOLGA8G | 32569611  | 0 |
| CHB | chr15 | GOLGA8G | 32619611  | 0 |
| CHB | chr15 | GOLGA8G | 32669611  | 0 |
| CHB | chr15 | GOLGA8G | 32719611  | 0 |
| CHB | chr15 | GOLGA8G | 32769611  | 0 |
| CHB | chr15 | GOLGA8G | 32819611  | 0 |
| CHB | chr15 | GOLGA8G | 32869611  | 0 |
| CHB | chr15 | GOLGA8G | 32919611  | 0 |
| CHB | chr15 | GOLGA8G | 32969611  | 0 |
| CHB | chr15 | GOLGA8G | 33019611  | 0 |
| CHB | chr15 | GOLGA8G | 33069611  | 0 |
| CHB | chr15 | GOLGA8G | 33119611  | 0 |
| CHB | chr15 | GOLGA8G | 33169611  | 0 |
| CHB | chr15 | GOLGA8G | 33219611  | 0 |
| CHB | chr15 | GOLGA8G | 33269611  | 0 |
| CHB | chr15 | GOLGA8G | 33319611  | 0 |
| CHB | chr15 | GOLGA8G | 33369611  | 0 |
| CHB | chr15 | GOLGA8G | 33419611  | 0 |
| CHB | chr15 | GOLGA8G | 33469611  | 0 |
| CHB | chr1  | HIST2   | 138952386 | 0 |
| CHB | chr1  | HIST2   | 139002386 | 0 |
| CHB | chr1  | HIST2   | 139052386 | 0 |
| CHB | chr1  | HIST2   | 139102386 | 0 |
| CHB | chr1  | HIST2   | 139152386 | 0 |
| CHB | chr1  | HIST2   | 139202386 | 0 |
| CHB | chr1  | HIST2   | 139252386 | 0 |
| CHB | chr1  | HIST2   | 139302386 | 0 |
| CHB | chr1  | HIST2   | 139352386 | 0 |
| CHB | chr1  | HIST2   | 139402386 | 0 |
| CHB | chr1  | HIST2   | 139452386 | 0 |
| CHB | chr1  | HIST2   | 139502386 | 0 |
| CHB | chr1  | HIST2   | 139552386 | 0 |
| CHB | chr1  | HIST2   | 139602386 | 0 |
| CHB | chr1  | HIST2   | 139652386 | 0 |
| CHB | chr1  | HIST2   | 139702386 | 0 |
| CHB | chr1  | HIST2   | 139752386 | 0 |
| CHB | chr1  | HIST2   | 139802386 | 0 |
| CHB | chr1  | HIST2   | 139852386 | 0 |

## 3\_Introgression\_data

|     |      |       |           |   |
|-----|------|-------|-----------|---|
| CHB | chr1 | HIST2 | 139902386 | 0 |
| CHB | chr1 | HIST2 | 139952386 | 0 |
| CHB | chr1 | HIST2 | 140002386 | 0 |
| CHB | chr1 | HIST2 | 140052386 | 0 |
| CHB | chr1 | HIST2 | 140102386 | 0 |
| CHB | chr1 | HIST2 | 140152386 | 0 |
| CHB | chr1 | HIST2 | 140202386 | 0 |
| CHB | chr1 | HIST2 | 140252386 | 0 |
| CHB | chr1 | HIST2 | 140302386 | 0 |
| CHB | chr1 | HIST2 | 140352386 | 0 |
| CHB | chr1 | HIST2 | 140402386 | 0 |
| CHB | chr1 | HIST2 | 140452386 | 0 |
| CHB | chr1 | HIST2 | 140502386 | 0 |
| CHB | chr1 | HIST2 | 140552386 | 0 |
| CHB | chr1 | HIST2 | 140602386 | 0 |
| CHB | chr1 | HIST2 | 140652386 | 0 |
| CHB | chr1 | HIST2 | 140702386 | 0 |
| CHB | chr1 | HIST2 | 140752386 | 0 |
| CHB | chr1 | HIST2 | 140802386 | 0 |
| CHB | chr1 | HIST2 | 140852386 | 0 |
| CHB | chr1 | HIST2 | 140902386 | 0 |
| CHB | chr1 | HIST2 | 140952386 | 0 |
| CHB | chr1 | HIST2 | 141002386 | 0 |
| CHB | chr1 | HIST2 | 141052386 | 0 |
| CHB | chr1 | HIST2 | 141102386 | 0 |
| CHB | chr1 | HIST2 | 141152386 | 0 |
| CHB | chr1 | HIST2 | 141202386 | 0 |
| CHB | chr1 | HIST2 | 141252386 | 0 |
| CHB | chr1 | HIST2 | 141302386 | 0 |
| CHB | chr1 | HIST2 | 141352386 | 0 |
| CHB | chr1 | HIST2 | 141402386 | 0 |
| CHB | chr1 | HIST2 | 141452386 | 0 |
| CHB | chr1 | HIST2 | 141502386 | 0 |
| CHB | chr1 | HIST2 | 141552386 | 0 |
| CHB | chr1 | HIST2 | 141602386 | 0 |
| CHB | chr1 | HIST2 | 141652386 | 0 |
| CHB | chr1 | HIST2 | 141702386 | 0 |
| CHB | chr1 | HIST2 | 141752386 | 0 |
| CHB | chr1 | HIST2 | 141802386 | 0 |
| CHB | chr1 | HIST2 | 141852386 | 0 |
| CHB | chr1 | HIST2 | 141902386 | 0 |
| CHB | chr1 | HIST2 | 141952386 | 0 |
| CHB | chr1 | HIST2 | 142002386 | 0 |
| CHB | chr1 | HIST2 | 142052386 | 0 |
| CHB | chr1 | HIST2 | 142102386 | 0 |
| CHB | chr1 | HIST2 | 142152386 | 0 |
| CHB | chr1 | HIST2 | 142202386 | 0 |
| CHB | chr1 | HIST2 | 142252386 | 0 |
| CHB | chr1 | HIST2 | 142302386 | 0 |

3\_Introgression\_data

|     |      |       |           |   |
|-----|------|-------|-----------|---|
| CHB | chr1 | HIST2 | 142352386 | 0 |
| CHB | chr1 | HIST2 | 142402386 | 0 |
| CHB | chr1 | HIST2 | 142452386 | 0 |
| CHB | chr1 | HIST2 | 142502386 | 0 |
| CHB | chr1 | HIST2 | 142552386 | 0 |
| CHB | chr1 | HIST2 | 142602386 | 0 |
| CHB | chr1 | HIST2 | 142652386 | 0 |
| CHB | chr1 | HIST2 | 142702386 | 0 |
| CHB | chr1 | HIST2 | 142752386 | 0 |
| CHB | chr1 | HIST2 | 142802386 | 0 |
| CHB | chr1 | HIST2 | 142852386 | 0 |
| CHB | chr1 | HIST2 | 142902386 | 0 |
| CHB | chr1 | HIST2 | 142952386 | 0 |
| CHB | chr1 | HIST2 | 143002386 | 0 |
| CHB | chr1 | HIST2 | 143052386 | 0 |
| CHB | chr1 | HIST2 | 143102386 | 0 |
| CHB | chr1 | HIST2 | 143152386 | 0 |
| CHB | chr1 | HIST2 | 143202386 | 0 |
| CHB | chr1 | HIST2 | 143252386 | 0 |
| CHB | chr1 | HIST2 | 143302386 | 0 |
| CHB | chr1 | HIST2 | 143352386 | 0 |
| CHB | chr1 | HIST2 | 143402386 | 0 |
| CHB | chr1 | HIST2 | 143452386 | 0 |
| CHB | chr1 | HIST2 | 143502386 | 0 |
| CHB | chr1 | HIST2 | 143552386 | 0 |
| CHB | chr1 | HIST2 | 143602386 | 0 |
| CHB | chr1 | HIST2 | 143652386 | 0 |
| CHB | chr1 | HIST2 | 143702386 | 0 |
| CHB | chr1 | HIST2 | 143752386 | 0 |
| CHB | chr1 | HIST2 | 143802386 | 0 |
| CHB | chr1 | HIST2 | 143852386 | 0 |
| CHB | chr1 | HIST2 | 143902386 | 0 |
| CHB | chr1 | HIST2 | 143952386 | 0 |
| CHB | chr1 | HIST2 | 144002386 | 0 |
| CHB | chr1 | HIST2 | 144052386 | 0 |
| CHB | chr1 | HIST2 | 144102386 | 0 |
| CHB | chr1 | HIST2 | 144152386 | 0 |
| CHB | chr1 | HIST2 | 144202386 | 0 |
| CHB | chr1 | HIST2 | 144252386 | 0 |
| CHB | chr1 | HIST2 | 144302386 | 0 |
| CHB | chr1 | HIST2 | 144352386 | 0 |
| CHB | chr1 | HIST2 | 144402386 | 0 |
| CHB | chr1 | HIST2 | 144452386 | 0 |
| CHB | chr1 | HIST2 | 144502386 | 0 |
| CHB | chr1 | HIST2 | 144552386 | 0 |
| CHB | chr1 | HIST2 | 144602386 | 0 |
| CHB | chr1 | HIST2 | 144652386 | 0 |
| CHB | chr1 | HIST2 | 144702386 | 0 |
| CHB | chr1 | HIST2 | 144752386 | 0 |

## 3\_Introgression\_data

|     |      |       |           |   |
|-----|------|-------|-----------|---|
| CHB | chr1 | HIST2 | 144802386 | 0 |
| CHB | chr1 | HIST2 | 144852386 | 0 |
| CHB | chr1 | HIST2 | 144902386 | 0 |
| CHB | chr1 | HIST2 | 144952386 | 0 |
| CHB | chr1 | HIST2 | 145002386 | 0 |
| CHB | chr1 | HIST2 | 145052386 | 0 |
| CHB | chr1 | HIST2 | 145102386 | 0 |
| CHB | chr1 | HIST2 | 145152386 | 0 |
| CHB | chr1 | HIST2 | 145202386 | 0 |
| CHB | chr1 | HIST2 | 145252386 | 0 |
| CHB | chr1 | HIST2 | 145302386 | 0 |
| CHB | chr1 | HIST2 | 145352386 | 0 |
| CHB | chr1 | HIST2 | 145402386 | 0 |
| CHB | chr1 | HIST2 | 145452386 | 0 |
| CHB | chr1 | HIST2 | 145502386 | 0 |
| CHB | chr1 | HIST2 | 145552386 | 0 |
| CHB | chr1 | HIST2 | 145602386 | 0 |
| CHB | chr1 | HIST2 | 145652386 | 0 |
| CHB | chr1 | HIST2 | 145702386 | 0 |
| CHB | chr1 | HIST2 | 145752386 | 0 |
| CHB | chr1 | HIST2 | 145802386 | 0 |
| CHB | chr1 | HIST2 | 145852386 | 0 |
| CHB | chr1 | HIST2 | 145902386 | 0 |
| CHB | chr1 | HIST2 | 145952386 | 0 |
| CHB | chr1 | HIST2 | 146002386 | 0 |
| CHB | chr1 | HIST2 | 146052386 | 0 |
| CHB | chr1 | HIST2 | 146102386 | 0 |
| CHB | chr1 | HIST2 | 146152386 | 0 |
| CHB | chr1 | HIST2 | 146202386 | 0 |
| CHB | chr1 | HIST2 | 146252386 | 0 |
| CHB | chr1 | HIST2 | 146302386 | 0 |
| CHB | chr1 | HIST2 | 146352386 | 0 |
| CHB | chr1 | HIST2 | 146402386 | 0 |
| CHB | chr1 | HIST2 | 146452386 | 0 |
| CHB | chr1 | HIST2 | 146502386 | 0 |
| CHB | chr1 | HIST2 | 146552386 | 0 |
| CHB | chr1 | HIST2 | 146602386 | 0 |
| CHB | chr1 | HIST2 | 146652386 | 0 |
| CHB | chr1 | HIST2 | 146702386 | 0 |
| CHB | chr1 | HIST2 | 146752386 | 0 |
| CHB | chr1 | HIST2 | 146802386 | 0 |
| CHB | chr1 | HIST2 | 146852386 | 0 |
| CHB | chr1 | HIST2 | 146902386 | 0 |
| CHB | chr1 | HIST2 | 146952386 | 0 |
| CHB | chr1 | HIST2 | 147002386 | 0 |
| CHB | chr1 | HIST2 | 147052386 | 0 |
| CHB | chr1 | HIST2 | 147102386 | 0 |
| CHB | chr1 | HIST2 | 147152386 | 0 |
| CHB | chr1 | HIST2 | 147202386 | 0 |



## 3\_Introgression\_data

|     |      |       |           |   |
|-----|------|-------|-----------|---|
| CHB | chr1 | HIST2 | 147252386 | 0 |
| CHB | chr1 | HIST2 | 147302386 | 0 |
| CHB | chr1 | HIST2 | 147352386 | 0 |
| CHB | chr1 | HIST2 | 147402386 | 0 |
| CHB | chr1 | HIST2 | 147452386 | 0 |
| CHB | chr1 | HIST2 | 147502386 | 0 |
| CHB | chr1 | HIST2 | 147552386 | 0 |
| CHB | chr1 | HIST2 | 147602386 | 0 |
| CHB | chr1 | HIST2 | 147652386 | 0 |
| CHB | chr1 | HIST2 | 147702386 | 0 |
| CHB | chr1 | HIST2 | 147752386 | 0 |
| CHB | chr1 | HIST2 | 147802386 | 0 |
| CHB | chr1 | HIST2 | 147852386 | 0 |
| CHB | chr1 | HIST2 | 147902386 | 0 |
| CHB | chr1 | HIST2 | 147952386 | 0 |
| CHB | chr1 | HIST2 | 148002386 | 0 |
| CHB | chr1 | HIST2 | 148052386 | 0 |
| CHB | chr1 | HIST2 | 148102386 | 0 |
| CHB | chr1 | HIST2 | 148152386 | 0 |
| CHB | chr1 | HIST2 | 148202386 | 0 |
| CHB | chr1 | HIST2 | 148252386 | 0 |
| CHB | chr1 | HIST2 | 148302386 | 0 |
| CHB | chr1 | HIST2 | 148352386 | 0 |
| CHB | chr1 | HIST2 | 148402386 | 0 |
| CHB | chr1 | HIST2 | 148452386 | 0 |
| CHB | chr1 | HIST2 | 148502386 | 0 |
| CHB | chr1 | HIST2 | 148552386 | 0 |
| CHB | chr1 | HIST2 | 148602386 | 0 |
| CHB | chr1 | HIST2 | 148652386 | 0 |
| CHB | chr1 | HIST2 | 148702386 | 0 |
| CHB | chr1 | HIST2 | 148752386 | 0 |
| CHB | chr1 | HIST2 | 148802386 | 0 |
| CHB | chr1 | HIST2 | 148852386 | 0 |
| CHB | chr1 | HIST2 | 144832689 | 0 |
| CHB | chr1 | HIST2 | 144882689 | 0 |
| CHB | chr1 | HIST2 | 144932689 | 0 |
| CHB | chr1 | HIST2 | 144982689 | 0 |
| CHB | chr1 | HIST2 | 145032689 | 0 |
| CHB | chr1 | HIST2 | 145082689 | 0 |
| CHB | chr1 | HIST2 | 145132689 | 0 |
| CHB | chr1 | HIST2 | 145182689 | 0 |
| CHB | chr1 | HIST2 | 145232689 | 0 |
| CHB | chr1 | HIST2 | 145282689 | 0 |
| CHB | chr1 | HIST2 | 145332689 | 0 |
| CHB | chr1 | HIST2 | 145382689 | 0 |
| CHB | chr1 | HIST2 | 145432689 | 0 |
| CHB | chr1 | HIST2 | 145482689 | 0 |
| CHB | chr1 | HIST2 | 145532689 | 0 |
| CHB | chr1 | HIST2 | 145582689 | 0 |

## 3\_Introgression\_data

|     |      |       |           |   |
|-----|------|-------|-----------|---|
| CHB | chr1 | HIST2 | 145632689 | 0 |
| CHB | chr1 | HIST2 | 145682689 | 0 |
| CHB | chr1 | HIST2 | 145732689 | 0 |
| CHB | chr1 | HIST2 | 145782689 | 0 |
| CHB | chr1 | HIST2 | 145832689 | 0 |
| CHB | chr1 | HIST2 | 145882689 | 0 |
| CHB | chr1 | HIST2 | 145932689 | 0 |
| CHB | chr1 | HIST2 | 145982689 | 0 |
| CHB | chr1 | HIST2 | 146032689 | 0 |
| CHB | chr1 | HIST2 | 146082689 | 0 |
| CHB | chr1 | HIST2 | 146132689 | 0 |
| CHB | chr1 | HIST2 | 146182689 | 0 |
| CHB | chr1 | HIST2 | 146232689 | 0 |
| CHB | chr1 | HIST2 | 146282689 | 0 |
| CHB | chr1 | HIST2 | 146332689 | 0 |
| CHB | chr1 | HIST2 | 146382689 | 0 |
| CHB | chr1 | HIST2 | 146432689 | 0 |
| CHB | chr1 | HIST2 | 146482689 | 0 |
| CHB | chr1 | HIST2 | 146532689 | 0 |
| CHB | chr1 | HIST2 | 146582689 | 0 |
| CHB | chr1 | HIST2 | 146632689 | 0 |
| CHB | chr1 | HIST2 | 146682689 | 0 |
| CHB | chr1 | HIST2 | 146732689 | 0 |
| CHB | chr1 | HIST2 | 146782689 | 0 |
| CHB | chr1 | HIST2 | 146832689 | 0 |
| CHB | chr1 | HIST2 | 146882689 | 0 |
| CHB | chr1 | HIST2 | 146932689 | 0 |
| CHB | chr1 | HIST2 | 146982689 | 0 |
| CHB | chr1 | HIST2 | 147032689 | 0 |
| CHB | chr1 | HIST2 | 147082689 | 0 |
| CHB | chr1 | HIST2 | 147132689 | 0 |
| CHB | chr1 | HIST2 | 147182689 | 0 |
| CHB | chr1 | HIST2 | 147232689 | 0 |
| CHB | chr1 | HIST2 | 147282689 | 0 |
| CHB | chr1 | HIST2 | 147332689 | 0 |
| CHB | chr1 | HIST2 | 147382689 | 0 |
| CHB | chr1 | HIST2 | 147432689 | 0 |
| CHB | chr1 | HIST2 | 147482689 | 0 |
| CHB | chr1 | HIST2 | 147532689 | 0 |
| CHB | chr1 | HIST2 | 147582689 | 0 |
| CHB | chr1 | HIST2 | 147632689 | 0 |
| CHB | chr1 | HIST2 | 147682689 | 0 |
| CHB | chr1 | HIST2 | 147732689 | 0 |
| CHB | chr1 | HIST2 | 147782689 | 0 |
| CHB | chr1 | HIST2 | 147832689 | 0 |
| CHB | chr1 | HIST2 | 147882689 | 0 |
| CHB | chr1 | HIST2 | 147932689 | 0 |
| CHB | chr1 | HIST2 | 147982689 | 0 |
| CHB | chr1 | HIST2 | 148032689 | 0 |

## 3\_Introgression\_data

|     |      |       |           |    |
|-----|------|-------|-----------|----|
| CHB | chr1 | HIST2 | 148082689 | 0  |
| CHB | chr1 | HIST2 | 148132689 | 0  |
| CHB | chr1 | HIST2 | 148182689 | 0  |
| CHB | chr1 | HIST2 | 148232689 | 0  |
| CHB | chr1 | HIST2 | 148282689 | 0  |
| CHB | chr1 | HIST2 | 148332689 | 0  |
| CHB | chr1 | HIST2 | 148382689 | 0  |
| CHB | chr1 | HIST2 | 148432689 | 0  |
| CHB | chr1 | HIST2 | 148482689 | 0  |
| CHB | chr1 | HIST2 | 148532689 | 0  |
| CHB | chr1 | HIST2 | 148582689 | 0  |
| CHB | chr1 | HIST2 | 148632689 | 0  |
| CHB | chr1 | HIST2 | 148682689 | 0  |
| CHB | chr1 | HIST2 | 148732689 | 0  |
| CHB | chr1 | HIST2 | 148782689 | 0  |
| CHB | chr1 | HIST2 | 148832689 | 0  |
| CHB | chr1 | HIST2 | 148882689 | 0  |
| CHB | chr1 | HIST2 | 148932689 | 0  |
| CHB | chr1 | HIST2 | 148982689 | 0  |
| CHB | chr1 | HIST2 | 149032689 | 0  |
| CHB | chr1 | HIST2 | 149082689 | 0  |
| CHB | chr1 | HIST2 | 149132689 | 0  |
| CHB | chr1 | HIST2 | 149182689 | 0  |
| CHB | chr1 | HIST2 | 149232689 | 0  |
| CHB | chr1 | HIST2 | 149282689 | 0  |
| CHB | chr1 | HIST2 | 149332689 | 0  |
| CHB | chr1 | HIST2 | 149382689 | 0  |
| CHB | chr1 | HIST2 | 149432689 | 0  |
| CHB | chr1 | HIST2 | 149482689 | 0  |
| CHB | chr1 | HIST2 | 149532689 | 0  |
| CHB | chr1 | HIST2 | 149582689 | 0  |
| CHB | chr1 | HIST2 | 149632689 | 0  |
| CHB | chr1 | HIST2 | 149682689 | 0  |
| CHB | chr1 | HIST2 | 149732689 | 0  |
| CHB | chr1 | HIST2 | 149782689 | 0  |
| CHB | chr1 | HIST2 | 149832689 | 2  |
| CHB | chr1 | HIST2 | 149882689 | 23 |
| CHB | chr1 | HIST2 | 149932689 | 32 |
| CHB | chr1 | HIST2 | 149982689 | 30 |
| CHB | chr1 | HIST2 | 150032689 | 40 |
| CHB | chr1 | HIST2 | 150082689 | 40 |
| CHB | chr1 | HIST2 | 150132689 | 40 |
| CHB | chr1 | HIST2 | 150182689 | 37 |
| CHB | chr1 | HIST2 | 150232689 | 30 |
| CHB | chr1 | HIST2 | 150282689 | 26 |
| CHB | chr1 | HIST2 | 150332689 | 29 |
| CHB | chr1 | HIST2 | 150382689 | 24 |
| CHB | chr1 | HIST2 | 150432689 | 15 |
| CHB | chr1 | HIST2 | 150482689 | 24 |

### 3\_Introgression\_data

|     |      |       |           |    |
|-----|------|-------|-----------|----|
| CHB | chr1 | HIST2 | 150532689 | 33 |
| CHB | chr1 | HIST2 | 150582689 | 50 |
| CHB | chr1 | HIST2 | 150632689 | 55 |
| CHB | chr1 | HIST2 | 150682689 | 40 |
| CHB | chr1 | HIST2 | 150732689 | 43 |
| CHB | chr1 | HIST2 | 150782689 | 43 |
| CHB | chr1 | HIST2 | 150832689 | 43 |
| CHB | chr1 | HIST2 | 150882689 | 40 |
| CHB | chr1 | HIST2 | 150932689 | 38 |
| CHB | chr1 | HIST2 | 150982689 | 23 |
| CHB | chr1 | HIST2 | 151032689 | 0  |
| CHB | chr1 | HIST2 | 151082689 | 0  |
| CHB | chr1 | HIST2 | 151132689 | 0  |
| CHB | chr1 | HIST2 | 151182689 | 0  |
| CHB | chr1 | HIST2 | 151232689 | 0  |
| CHB | chr1 | HIST2 | 151282689 | 0  |
| CHB | chr1 | HIST2 | 151332689 | 0  |
| CHB | chr1 | HIST2 | 151382689 | 0  |
| CHB | chr1 | HIST2 | 151432689 | 0  |
| CHB | chr1 | HIST2 | 151482689 | 0  |
| CHB | chr1 | HIST2 | 151532689 | 0  |
| CHB | chr1 | HIST2 | 151582689 | 0  |
| CHB | chr1 | HIST2 | 151632689 | 0  |
| CHB | chr1 | HIST2 | 151682689 | 1  |
| CHB | chr1 | HIST2 | 151732689 | 15 |
| CHB | chr1 | HIST2 | 151782689 | 22 |
| CHB | chr1 | HIST2 | 151832689 | 25 |
| CHB | chr1 | HIST2 | 151882689 | 31 |
| CHB | chr1 | HIST2 | 151932689 | 40 |
| CHB | chr1 | HIST2 | 151982689 | 46 |
| CHB | chr1 | HIST2 | 152032689 | 86 |
| CHB | chr1 | HIST2 | 152082689 | 96 |
| CHB | chr1 | HIST2 | 152132689 | 56 |
| CHB | chr1 | HIST2 | 152182689 | 48 |
| CHB | chr1 | HIST2 | 152232689 | 58 |
| CHB | chr1 | HIST2 | 152282689 | 51 |
| CHB | chr1 | HIST2 | 152332689 | 28 |
| CHB | chr1 | HIST2 | 152382689 | 30 |
| CHB | chr1 | HIST2 | 152432689 | 36 |
| CHB | chr1 | HIST2 | 152482689 | 34 |
| CHB | chr1 | HIST2 | 152532689 | 16 |
| CHB | chr1 | HIST2 | 152582689 | 1  |
| CHB | chr1 | HIST2 | 152632689 | 0  |
| CHB | chr1 | HIST2 | 152682689 | 0  |
| CHB | chr1 | HIST2 | 152732689 | 0  |
| CHB | chr1 | HIST2 | 152782689 | 0  |
| CHB | chr1 | HIST2 | 152832689 | 0  |
| CHB | chr1 | HIST2 | 152882689 | 56 |
| CHB | chr1 | HIST2 | 152932689 | 75 |

## 3\_Introgression\_data

|     |      |       |           |    |
|-----|------|-------|-----------|----|
| CHB | chr1 | HIST2 | 152982689 | 37 |
| CHB | chr1 | HIST2 | 153032689 | 47 |
| CHB | chr1 | HIST2 | 153082689 | 55 |
| CHB | chr1 | HIST2 | 153132689 | 44 |
| CHB | chr1 | HIST2 | 153182689 | 48 |
| CHB | chr1 | HIST2 | 153232689 | 64 |
| CHB | chr1 | HIST2 | 153282689 | 63 |
| CHB | chr1 | HIST2 | 153332689 | 44 |
| CHB | chr1 | HIST2 | 153382689 | 17 |
| CHB | chr1 | HIST2 | 153432689 | 2  |
| CHB | chr1 | HIST2 | 153482689 | 0  |
| CHB | chr1 | HIST2 | 153532689 | 0  |
| CHB | chr1 | HIST2 | 153582689 | 0  |
| CHB | chr1 | HIST2 | 153632689 | 0  |
| CHB | chr1 | HIST2 | 153682689 | 0  |
| CHB | chr1 | HIST2 | 153732689 | 0  |
| CHB | chr1 | HIST2 | 153782689 | 0  |
| CHB | chr1 | HIST2 | 153832689 | 0  |
| CHB | chr1 | HIST2 | 153882689 | 0  |
| CHB | chr1 | HIST2 | 153932689 | 0  |
| CHB | chr1 | HIST2 | 153982689 | 0  |
| CHB | chr1 | HIST2 | 154032689 | 0  |
| CHB | chr1 | HIST2 | 154082689 | 0  |
| CHB | chr1 | HIST2 | 154132689 | 0  |
| CHB | chr1 | HIST2 | 154182689 | 0  |
| CHB | chr1 | HIST2 | 154232689 | 0  |
| CHB | chr1 | HIST2 | 154282689 | 0  |
| CHB | chr1 | HIST2 | 154332689 | 0  |
| CHB | chr1 | HIST2 | 154382689 | 0  |
| CHB | chr1 | HIST2 | 154432689 | 0  |
| CHB | chr1 | HIST2 | 154482689 | 0  |
| CHB | chr1 | HIST2 | 154532689 | 0  |
| CHB | chr1 | HIST2 | 154582689 | 0  |
| CHB | chr1 | HIST2 | 154632689 | 0  |
| CHB | chr1 | HIST2 | 154682689 | 0  |
| CHB | chr1 | HIST2 | 154732689 | 0  |
| CHB | chr2 | LIMS3 | 104948688 | 0  |
| CHB | chr2 | LIMS3 | 104998688 | 0  |
| CHB | chr2 | LIMS3 | 105048688 | 0  |
| CHB | chr2 | LIMS3 | 105098688 | 0  |
| CHB | chr2 | LIMS3 | 105148688 | 0  |
| CHB | chr2 | LIMS3 | 105198688 | 0  |
| CHB | chr2 | LIMS3 | 105248688 | 0  |
| CHB | chr2 | LIMS3 | 105298688 | 0  |
| CHB | chr2 | LIMS3 | 105348688 | 0  |
| CHB | chr2 | LIMS3 | 105398688 | 0  |
| CHB | chr2 | LIMS3 | 105448688 | 0  |
| CHB | chr2 | LIMS3 | 105498688 | 0  |
| CHB | chr2 | LIMS3 | 105548688 | 0  |

## 3\_Introgression\_data

|     |      |       |           |    |
|-----|------|-------|-----------|----|
| CHB | chr2 | LIMS3 | 105598688 | 0  |
| CHB | chr2 | LIMS3 | 105648688 | 0  |
| CHB | chr2 | LIMS3 | 105698688 | 0  |
| CHB | chr2 | LIMS3 | 105748688 | 0  |
| CHB | chr2 | LIMS3 | 105798688 | 0  |
| CHB | chr2 | LIMS3 | 105848688 | 9  |
| CHB | chr2 | LIMS3 | 105898688 | 15 |
| CHB | chr2 | LIMS3 | 105948688 | 26 |
| CHB | chr2 | LIMS3 | 105998688 | 35 |
| CHB | chr2 | LIMS3 | 106048688 | 65 |
| CHB | chr2 | LIMS3 | 106098688 | 61 |
| CHB | chr2 | LIMS3 | 106148688 | 25 |
| CHB | chr2 | LIMS3 | 106198688 | 53 |
| CHB | chr2 | LIMS3 | 106248688 | 49 |
| CHB | chr2 | LIMS3 | 106298688 | 44 |
| CHB | chr2 | LIMS3 | 106348688 | 34 |
| CHB | chr2 | LIMS3 | 106398688 | 0  |
| CHB | chr2 | LIMS3 | 106448688 | 0  |
| CHB | chr2 | LIMS3 | 106498688 | 0  |
| CHB | chr2 | LIMS3 | 106548688 | 0  |
| CHB | chr2 | LIMS3 | 106598688 | 0  |
| CHB | chr2 | LIMS3 | 106648688 | 0  |
| CHB | chr2 | LIMS3 | 106698688 | 0  |
| CHB | chr2 | LIMS3 | 106748688 | 0  |
| CHB | chr2 | LIMS3 | 106798688 | 0  |
| CHB | chr2 | LIMS3 | 106848688 | 0  |
| CHB | chr2 | LIMS3 | 106898688 | 0  |
| CHB | chr2 | LIMS3 | 106948688 | 0  |
| CHB | chr2 | LIMS3 | 106998688 | 0  |
| CHB | chr2 | LIMS3 | 107048688 | 0  |
| CHB | chr2 | LIMS3 | 107098688 | 0  |
| CHB | chr2 | LIMS3 | 107148688 | 0  |
| CHB | chr2 | LIMS3 | 107198688 | 0  |
| CHB | chr2 | LIMS3 | 107248688 | 0  |
| CHB | chr2 | LIMS3 | 107298688 | 0  |
| CHB | chr2 | LIMS3 | 107348688 | 0  |
| CHB | chr2 | LIMS3 | 107398688 | 0  |
| CHB | chr2 | LIMS3 | 107448688 | 0  |
| CHB | chr2 | LIMS3 | 107498688 | 0  |
| CHB | chr2 | LIMS3 | 107548688 | 0  |
| CHB | chr2 | LIMS3 | 107598688 | 0  |
| CHB | chr2 | LIMS3 | 107648688 | 0  |
| CHB | chr2 | LIMS3 | 107698688 | 0  |
| CHB | chr2 | LIMS3 | 107748688 | 0  |
| CHB | chr2 | LIMS3 | 107798688 | 0  |
| CHB | chr2 | LIMS3 | 107848688 | 0  |
| CHB | chr2 | LIMS3 | 107898688 | 0  |
| CHB | chr2 | LIMS3 | 107948688 | 0  |
| CHB | chr2 | LIMS3 | 107998688 | 0  |

3\_Introgression\_data

|     |      |       |           |    |
|-----|------|-------|-----------|----|
| CHB | chr2 | LIMS3 | 108048688 | 0  |
| CHB | chr2 | LIMS3 | 108098688 | 0  |
| CHB | chr2 | LIMS3 | 108148688 | 0  |
| CHB | chr2 | LIMS3 | 108198688 | 0  |
| CHB | chr2 | LIMS3 | 108248688 | 0  |
| CHB | chr2 | LIMS3 | 108298688 | 0  |
| CHB | chr2 | LIMS3 | 108348688 | 0  |
| CHB | chr2 | LIMS3 | 108398688 | 0  |
| CHB | chr2 | LIMS3 | 108448688 | 0  |
| CHB | chr2 | LIMS3 | 108498688 | 0  |
| CHB | chr2 | LIMS3 | 108548688 | 0  |
| CHB | chr2 | LIMS3 | 108598688 | 0  |
| CHB | chr2 | LIMS3 | 108648688 | 0  |
| CHB | chr2 | LIMS3 | 108698688 | 5  |
| CHB | chr2 | LIMS3 | 108748688 | 15 |
| CHB | chr2 | LIMS3 | 108798688 | 25 |
| CHB | chr2 | LIMS3 | 108848688 | 25 |
| CHB | chr2 | LIMS3 | 108898688 | 21 |
| CHB | chr2 | LIMS3 | 108948688 | 47 |
| CHB | chr2 | LIMS3 | 108998688 | 72 |
| CHB | chr2 | LIMS3 | 109048688 | 66 |
| CHB | chr2 | LIMS3 | 109098688 | 62 |
| CHB | chr2 | LIMS3 | 109148688 | 56 |
| CHB | chr2 | LIMS3 | 109198688 | 44 |
| CHB | chr2 | LIMS3 | 109248688 | 32 |
| CHB | chr2 | LIMS3 | 109298688 | 28 |
| CHB | chr2 | LIMS3 | 109348688 | 26 |
| CHB | chr2 | LIMS3 | 109398688 | 25 |
| CHB | chr2 | LIMS3 | 109448688 | 25 |
| CHB | chr2 | LIMS3 | 109498688 | 29 |
| CHB | chr2 | LIMS3 | 109548688 | 52 |
| CHB | chr2 | LIMS3 | 109598688 | 59 |
| CHB | chr2 | LIMS3 | 109648688 | 87 |
| CHB | chr2 | LIMS3 | 109698688 | 76 |
| CHB | chr2 | LIMS3 | 109748688 | 34 |
| CHB | chr2 | LIMS3 | 109798688 | 36 |
| CHB | chr2 | LIMS3 | 109848688 | 46 |
| CHB | chr2 | LIMS3 | 109898688 | 59 |
| CHB | chr2 | LIMS3 | 109948688 | 60 |
| CHB | chr2 | LIMS3 | 109998688 | 54 |
| CHB | chr2 | LIMS3 | 110048688 | 43 |
| CHB | chr2 | LIMS3 | 110098688 | 19 |
| CHB | chr2 | LIMS3 | 110148688 | 0  |
| CHB | chr2 | LIMS3 | 110198688 | 0  |
| CHB | chr2 | LIMS3 | 110248688 | 0  |
| CHB | chr2 | LIMS3 | 110298688 | 1  |
| CHB | chr2 | LIMS3 | 110348688 | 6  |
| CHB | chr2 | LIMS3 | 110398688 | 18 |
| CHB | chr2 | LIMS3 | 110448688 | 31 |

## 3\_Introgression\_data

|     |      |       |           |    |
|-----|------|-------|-----------|----|
| CHB | chr2 | LIMS3 | 110498688 | 20 |
| CHB | chr2 | LIMS3 | 110548688 | 2  |
| CHB | chr2 | LIMS3 | 110598688 | 0  |
| CHB | chr2 | LIMS3 | 110648688 | 0  |
| CHB | chr2 | LIMS3 | 110698688 | 0  |
| CHB | chr2 | LIMS3 | 110748688 | 0  |
| CHB | chr2 | LIMS3 | 110798688 | 0  |
| CHB | chr2 | LIMS3 | 110848688 | 0  |
| CHB | chr2 | LIMS3 | 110898688 | 0  |
| CHB | chr2 | LIMS3 | 110948688 | 0  |
| CHB | chr2 | LIMS3 | 110998688 | 0  |
| CHB | chr2 | LIMS3 | 111048688 | 0  |
| CHB | chr2 | LIMS3 | 111098688 | 0  |
| CHB | chr2 | LIMS3 | 111148688 | 0  |
| CHB | chr2 | LIMS3 | 111198688 | 0  |
| CHB | chr2 | LIMS3 | 111248688 | 0  |
| CHB | chr2 | LIMS3 | 111298688 | 0  |
| CHB | chr2 | LIMS3 | 111348688 | 0  |
| CHB | chr2 | LIMS3 | 111398688 | 0  |
| CHB | chr2 | LIMS3 | 111448688 | 0  |
| CHB | chr2 | LIMS3 | 111498688 | 0  |
| CHB | chr2 | LIMS3 | 111548688 | 0  |
| CHB | chr2 | LIMS3 | 111598688 | 0  |
| CHB | chr2 | LIMS3 | 111648688 | 0  |
| CHB | chr2 | LIMS3 | 111698688 | 0  |
| CHB | chr2 | LIMS3 | 111748688 | 0  |
| CHB | chr2 | LIMS3 | 111798688 | 0  |
| CHB | chr2 | LIMS3 | 111848688 | 0  |
| CHB | chr2 | LIMS3 | 111898688 | 0  |
| CHB | chr2 | LIMS3 | 111948688 | 0  |
| CHB | chr2 | LIMS3 | 111998688 | 0  |
| CHB | chr2 | LIMS3 | 112048688 | 0  |
| CHB | chr2 | LIMS3 | 112098688 | 19 |
| CHB | chr2 | LIMS3 | 112148688 | 25 |
| CHB | chr2 | LIMS3 | 112198688 | 6  |
| CHB | chr2 | LIMS3 | 112248688 | 0  |
| CHB | chr2 | LIMS3 | 112298688 | 0  |
| CHB | chr2 | LIMS3 | 112348688 | 0  |
| CHB | chr2 | LIMS3 | 112398688 | 0  |
| CHB | chr2 | LIMS3 | 112448688 | 0  |
| CHB | chr2 | LIMS3 | 112498688 | 0  |
| CHB | chr2 | LIMS3 | 112548688 | 0  |
| CHB | chr2 | LIMS3 | 112598688 | 0  |
| CHB | chr2 | LIMS3 | 112648688 | 0  |
| CHB | chr2 | LIMS3 | 112698688 | 0  |
| CHB | chr2 | LIMS3 | 112748688 | 0  |
| CHB | chr2 | LIMS3 | 112798688 | 0  |
| CHB | chr2 | LIMS3 | 112848688 | 0  |
| CHB | chr2 | LIMS3 | 112898688 | 0  |



## 3\_Introgression\_data

|     |      |       |           |   |
|-----|------|-------|-----------|---|
| CHB | chr2 | LIMS3 | 112948688 | 0 |
| CHB | chr2 | LIMS3 | 112998688 | 0 |
| CHB | chr2 | LIMS3 | 113048688 | 0 |
| CHB | chr2 | LIMS3 | 113098688 | 0 |
| CHB | chr2 | LIMS3 | 113148688 | 0 |
| CHB | chr2 | LIMS3 | 113198688 | 0 |
| CHB | chr2 | LIMS3 | 113248688 | 0 |
| CHB | chr2 | LIMS3 | 113298688 | 0 |
| CHB | chr2 | LIMS3 | 113348688 | 0 |
| CHB | chr2 | LIMS3 | 113398688 | 0 |
| CHB | chr2 | LIMS3 | 113448688 | 0 |
| CHB | chr2 | LIMS3 | 113498688 | 0 |
| CHB | chr2 | LIMS3 | 113548688 | 0 |
| CHB | chr2 | LIMS3 | 113598688 | 0 |
| CHB | chr2 | LIMS3 | 113648688 | 0 |
| CHB | chr2 | LIMS3 | 113698688 | 0 |
| CHB | chr2 | LIMS3 | 113748688 | 0 |
| CHB | chr2 | LIMS3 | 113798688 | 0 |
| CHB | chr2 | LIMS3 | 113848688 | 0 |
| CHB | chr2 | LIMS3 | 113898688 | 0 |
| CHB | chr2 | LIMS3 | 113948688 | 0 |
| CHB | chr2 | LIMS3 | 113998688 | 0 |
| CHB | chr2 | LIMS3 | 114048688 | 0 |
| CHB | chr2 | LIMS3 | 114098688 | 0 |
| CHB | chr2 | LIMS3 | 114148688 | 0 |
| CHB | chr2 | LIMS3 | 114198688 | 0 |
| CHB | chr2 | LIMS3 | 114248688 | 0 |
| CHB | chr2 | LIMS3 | 114298688 | 0 |
| CHB | chr2 | LIMS3 | 114348688 | 0 |
| CHB | chr2 | LIMS3 | 114398688 | 0 |
| CHB | chr2 | LIMS3 | 114448688 | 0 |
| CHB | chr2 | LIMS3 | 114498688 | 0 |
| CHB | chr2 | LIMS3 | 114548688 | 0 |
| CHB | chr2 | LIMS3 | 114598688 | 0 |
| CHB | chr2 | LIMS3 | 114648688 | 0 |
| CHB | chr2 | LIMS3 | 114698688 | 0 |
| CHB | chr2 | LIMS3 | 114748688 | 0 |
| CHB | chr2 | LIMS3 | 114798688 | 0 |
| CHB | chr2 | LIMS3 | 114848688 | 0 |
| CHB | chr7 | MUC12 | 96019565  | 0 |
| CHB | chr7 | MUC12 | 96069565  | 0 |
| CHB | chr7 | MUC12 | 96119565  | 0 |
| CHB | chr7 | MUC12 | 96169565  | 0 |
| CHB | chr7 | MUC12 | 96219565  | 0 |
| CHB | chr7 | MUC12 | 96269565  | 0 |
| CHB | chr7 | MUC12 | 96319565  | 0 |
| CHB | chr7 | MUC12 | 96369565  | 0 |
| CHB | chr7 | MUC12 | 96419565  | 0 |
| CHB | chr7 | MUC12 | 96469565  | 0 |

## 3\_Introgression\_data

|     |      |       |          |   |
|-----|------|-------|----------|---|
| CHB | chr7 | MUC12 | 96519565 | 0 |
| CHB | chr7 | MUC12 | 96569565 | 0 |
| CHB | chr7 | MUC12 | 96619565 | 0 |
| CHB | chr7 | MUC12 | 96669565 | 0 |
| CHB | chr7 | MUC12 | 96719565 | 0 |
| CHB | chr7 | MUC12 | 96769565 | 0 |
| CHB | chr7 | MUC12 | 96819565 | 0 |
| CHB | chr7 | MUC12 | 96869565 | 0 |
| CHB | chr7 | MUC12 | 96919565 | 0 |
| CHB | chr7 | MUC12 | 96969565 | 0 |
| CHB | chr7 | MUC12 | 97019565 | 0 |
| CHB | chr7 | MUC12 | 97069565 | 0 |
| CHB | chr7 | MUC12 | 97119565 | 0 |
| CHB | chr7 | MUC12 | 97169565 | 0 |
| CHB | chr7 | MUC12 | 97219565 | 0 |
| CHB | chr7 | MUC12 | 97269565 | 0 |
| CHB | chr7 | MUC12 | 97319565 | 0 |
| CHB | chr7 | MUC12 | 97369565 | 0 |
| CHB | chr7 | MUC12 | 97419565 | 0 |
| CHB | chr7 | MUC12 | 97469565 | 0 |
| CHB | chr7 | MUC12 | 97519565 | 0 |
| CHB | chr7 | MUC12 | 97569565 | 0 |
| CHB | chr7 | MUC12 | 97619565 | 0 |
| CHB | chr7 | MUC12 | 97669565 | 0 |
| CHB | chr7 | MUC12 | 97719565 | 0 |
| CHB | chr7 | MUC12 | 97769565 | 0 |
| CHB | chr7 | MUC12 | 97819565 | 0 |
| CHB | chr7 | MUC12 | 97869565 | 0 |
| CHB | chr7 | MUC12 | 97919565 | 0 |
| CHB | chr7 | MUC12 | 97969565 | 0 |
| CHB | chr7 | MUC12 | 98019565 | 0 |
| CHB | chr7 | MUC12 | 98069565 | 0 |
| CHB | chr7 | MUC12 | 98119565 | 0 |
| CHB | chr7 | MUC12 | 98169565 | 0 |
| CHB | chr7 | MUC12 | 98219565 | 0 |
| CHB | chr7 | MUC12 | 98269565 | 0 |
| CHB | chr7 | MUC12 | 98319565 | 0 |
| CHB | chr7 | MUC12 | 98369565 | 0 |
| CHB | chr7 | MUC12 | 98419565 | 0 |
| CHB | chr7 | MUC12 | 98469565 | 0 |
| CHB | chr7 | MUC12 | 98519565 | 0 |
| CHB | chr7 | MUC12 | 98569565 | 0 |
| CHB | chr7 | MUC12 | 98619565 | 0 |
| CHB | chr7 | MUC12 | 98669565 | 0 |
| CHB | chr7 | MUC12 | 98719565 | 0 |
| CHB | chr7 | MUC12 | 98769565 | 0 |
| CHB | chr7 | MUC12 | 98819565 | 0 |
| CHB | chr7 | MUC12 | 98869565 | 0 |
| CHB | chr7 | MUC12 | 98919565 | 0 |

## 3\_Introgression\_data

|     |      |       |           |   |
|-----|------|-------|-----------|---|
| CHB | chr7 | MUC12 | 98969565  | 0 |
| CHB | chr7 | MUC12 | 99019565  | 0 |
| CHB | chr7 | MUC12 | 99069565  | 0 |
| CHB | chr7 | MUC12 | 99119565  | 0 |
| CHB | chr7 | MUC12 | 99169565  | 0 |
| CHB | chr7 | MUC12 | 99219565  | 0 |
| CHB | chr7 | MUC12 | 99269565  | 0 |
| CHB | chr7 | MUC12 | 99319565  | 0 |
| CHB | chr7 | MUC12 | 99369565  | 0 |
| CHB | chr7 | MUC12 | 99419565  | 0 |
| CHB | chr7 | MUC12 | 99469565  | 0 |
| CHB | chr7 | MUC12 | 99519565  | 0 |
| CHB | chr7 | MUC12 | 99569565  | 0 |
| CHB | chr7 | MUC12 | 99619565  | 0 |
| CHB | chr7 | MUC12 | 99669565  | 0 |
| CHB | chr7 | MUC12 | 99719565  | 0 |
| CHB | chr7 | MUC12 | 99769565  | 0 |
| CHB | chr7 | MUC12 | 99819565  | 0 |
| CHB | chr7 | MUC12 | 99869565  | 0 |
| CHB | chr7 | MUC12 | 99919565  | 0 |
| CHB | chr7 | MUC12 | 99969565  | 0 |
| CHB | chr7 | MUC12 | 100019565 | 0 |
| CHB | chr7 | MUC12 | 100069565 | 0 |
| CHB | chr7 | MUC12 | 100119565 | 0 |
| CHB | chr7 | MUC12 | 100169565 | 0 |
| CHB | chr7 | MUC12 | 100219565 | 0 |
| CHB | chr7 | MUC12 | 100269565 | 0 |
| CHB | chr7 | MUC12 | 100319565 | 0 |
| CHB | chr7 | MUC12 | 100369565 | 0 |
| CHB | chr7 | MUC12 | 100419565 | 0 |
| CHB | chr7 | MUC12 | 100469565 | 0 |
| CHB | chr7 | MUC12 | 100519565 | 0 |
| CHB | chr7 | MUC12 | 100569565 | 0 |
| CHB | chr7 | MUC12 | 100619565 | 0 |
| CHB | chr7 | MUC12 | 100669565 | 0 |
| CHB | chr7 | MUC12 | 100719565 | 0 |
| CHB | chr7 | MUC12 | 100769565 | 0 |
| CHB | chr7 | MUC12 | 100819565 | 0 |
| CHB | chr7 | MUC12 | 100869565 | 0 |
| CHB | chr7 | MUC12 | 100919565 | 0 |
| CHB | chr7 | MUC12 | 100969565 | 0 |
| CHB | chr7 | MUC12 | 101019565 | 0 |
| CHB | chr7 | MUC12 | 101069565 | 0 |
| CHB | chr7 | MUC12 | 101119565 | 0 |
| CHB | chr7 | MUC12 | 101169565 | 0 |
| CHB | chr7 | MUC12 | 101219565 | 0 |
| CHB | chr7 | MUC12 | 101269565 | 0 |
| CHB | chr7 | MUC12 | 101319565 | 0 |
| CHB | chr7 | MUC12 | 101369565 | 0 |

3\_Introgression\_data

|     |      |       |           |    |
|-----|------|-------|-----------|----|
| CHB | chr7 | MUC12 | 101419565 | 0  |
| CHB | chr7 | MUC12 | 101469565 | 0  |
| CHB | chr7 | MUC12 | 101519565 | 0  |
| CHB | chr7 | MUC12 | 101569565 | 0  |
| CHB | chr7 | MUC12 | 101619565 | 0  |
| CHB | chr7 | MUC12 | 101669565 | 0  |
| CHB | chr7 | MUC12 | 101719565 | 0  |
| CHB | chr7 | MUC12 | 101769565 | 0  |
| CHB | chr7 | MUC12 | 101819565 | 0  |
| CHB | chr7 | MUC12 | 101869565 | 0  |
| CHB | chr7 | MUC12 | 101919565 | 0  |
| CHB | chr7 | MUC12 | 101969565 | 0  |
| CHB | chr7 | MUC12 | 102019565 | 0  |
| CHB | chr7 | MUC12 | 102069565 | 0  |
| CHB | chr7 | MUC12 | 102119565 | 0  |
| CHB | chr7 | MUC12 | 102169565 | 0  |
| CHB | chr7 | MUC12 | 102219565 | 0  |
| CHB | chr7 | MUC12 | 102269565 | 0  |
| CHB | chr7 | MUC12 | 102319565 | 0  |
| CHB | chr7 | MUC12 | 102369565 | 0  |
| CHB | chr7 | MUC12 | 102419565 | 0  |
| CHB | chr7 | MUC12 | 102469565 | 0  |
| CHB | chr7 | MUC12 | 102519565 | 0  |
| CHB | chr7 | MUC12 | 102569565 | 0  |
| CHB | chr7 | MUC12 | 102619565 | 0  |
| CHB | chr7 | MUC12 | 102669565 | 0  |
| CHB | chr7 | MUC12 | 102719565 | 0  |
| CHB | chr7 | MUC12 | 102769565 | 0  |
| CHB | chr7 | MUC12 | 102819565 | 0  |
| CHB | chr7 | MUC12 | 102869565 | 0  |
| CHB | chr7 | MUC12 | 102919565 | 0  |
| CHB | chr7 | MUC12 | 102969565 | 0  |
| CHB | chr7 | MUC12 | 103019565 | 0  |
| CHB | chr7 | MUC12 | 103069565 | 0  |
| CHB | chr7 | MUC12 | 103119565 | 0  |
| CHB | chr7 | MUC12 | 103169565 | 0  |
| CHB | chr7 | MUC12 | 103219565 | 0  |
| CHB | chr7 | MUC12 | 103269565 | 0  |
| CHB | chr7 | MUC12 | 103319565 | 0  |
| CHB | chr7 | MUC12 | 103369565 | 5  |
| CHB | chr7 | MUC12 | 103419565 | 24 |
| CHB | chr7 | MUC12 | 103469565 | 33 |
| CHB | chr7 | MUC12 | 103519565 | 88 |
| CHB | chr7 | MUC12 | 103569565 | 82 |
| CHB | chr7 | MUC12 | 103619565 | 8  |
| CHB | chr7 | MUC12 | 103669565 | 0  |
| CHB | chr7 | MUC12 | 103719565 | 0  |
| CHB | chr7 | MUC12 | 103769565 | 0  |
| CHB | chr7 | MUC12 | 103819565 | 0  |

### 3\_Introgression\_data

|     |      |        |           |     |
|-----|------|--------|-----------|-----|
| CHB | chr7 | MUC12  | 103869565 | 18  |
| CHB | chr7 | MUC12  | 103919565 | 36  |
| CHB | chr7 | MUC12  | 103969565 | 37  |
| CHB | chr7 | MUC12  | 104019565 | 40  |
| CHB | chr7 | MUC12  | 104069565 | 44  |
| CHB | chr7 | MUC12  | 104119565 | 40  |
| CHB | chr7 | MUC12  | 104169565 | 43  |
| CHB | chr7 | MUC12  | 104219565 | 83  |
| CHB | chr7 | MUC12  | 104269565 | 112 |
| CHB | chr7 | MUC12  | 104319565 | 69  |
| CHB | chr7 | MUC12  | 104369565 | 42  |
| CHB | chr7 | MUC12  | 104419565 | 32  |
| CHB | chr7 | MUC12  | 104469565 | 16  |
| CHB | chr7 | MUC12  | 104519565 | 30  |
| CHB | chr7 | MUC12  | 104569565 | 36  |
| CHB | chr7 | MUC12  | 104619565 | 57  |
| CHB | chr7 | MUC12  | 104669565 | 83  |
| CHB | chr7 | MUC12  | 104719565 | 65  |
| CHB | chr7 | MUC12  | 104769565 | 78  |
| CHB | chr7 | MUC12  | 104819565 | 91  |
| CHB | chr7 | MUC12  | 104869565 | 47  |
| CHB | chr7 | MUC12  | 104919565 | 40  |
| CHB | chr7 | MUC12  | 104969565 | 44  |
| CHB | chr7 | MUC12  | 105019565 | 64  |
| CHB | chr7 | MUC12  | 105069565 | 63  |
| CHB | chr7 | MUC12  | 105119565 | 131 |
| CHB | chr7 | MUC12  | 105169565 | 137 |
| CHB | chr7 | MUC12  | 105219565 | 22  |
| CHB | chr7 | MUC12  | 105269565 | 0   |
| CHB | chr7 | MUC12  | 105319565 | 0   |
| CHB | chr7 | MUC12  | 105369565 | 0   |
| CHB | chr7 | MUC12  | 105419565 | 0   |
| CHB | chr7 | MUC12  | 105469565 | 0   |
| CHB | chr7 | MUC12  | 105519565 | 0   |
| CHB | chr7 | MUC12  | 105569565 | 0   |
| CHB | chr7 | MUC12  | 105619565 | 0   |
| CHB | chr7 | MUC12  | 105669565 | 0   |
| CHB | chr7 | MUC12  | 105719565 | 0   |
| CHB | chr7 | MUC12  | 105769565 | 0   |
| CHB | chr7 | MUC12  | 105819565 | 0   |
| CHB | chr7 | MUC12  | 105869565 | 0   |
| CHB | chr7 | MUC12  | 105919565 | 0   |
| CHB | chr1 | NBPF11 | 143152151 | 0   |
| CHB | chr1 | NBPF11 | 143202151 | 0   |
| CHB | chr1 | NBPF11 | 143252151 | 0   |
| CHB | chr1 | NBPF11 | 143302151 | 0   |
| CHB | chr1 | NBPF11 | 143352151 | 0   |
| CHB | chr1 | NBPF11 | 143402151 | 0   |
| CHB | chr1 | NBPF11 | 143452151 | 0   |

## 3\_Introgression\_data

|     |      |        |           |   |
|-----|------|--------|-----------|---|
| CHB | chr1 | NBPF11 | 143502151 | 0 |
| CHB | chr1 | NBPF11 | 143552151 | 0 |
| CHB | chr1 | NBPF11 | 143602151 | 0 |
| CHB | chr1 | NBPF11 | 143652151 | 0 |
| CHB | chr1 | NBPF11 | 143702151 | 0 |
| CHB | chr1 | NBPF11 | 143752151 | 0 |
| CHB | chr1 | NBPF11 | 143802151 | 0 |
| CHB | chr1 | NBPF11 | 143852151 | 0 |
| CHB | chr1 | NBPF11 | 143902151 | 0 |
| CHB | chr1 | NBPF11 | 143952151 | 0 |
| CHB | chr1 | NBPF11 | 144002151 | 0 |
| CHB | chr1 | NBPF11 | 144052151 | 0 |
| CHB | chr1 | NBPF11 | 144102151 | 0 |
| CHB | chr1 | NBPF11 | 144152151 | 0 |
| CHB | chr1 | NBPF11 | 144202151 | 0 |
| CHB | chr1 | NBPF11 | 144252151 | 0 |
| CHB | chr1 | NBPF11 | 144302151 | 0 |
| CHB | chr1 | NBPF11 | 144352151 | 0 |
| CHB | chr1 | NBPF11 | 144402151 | 0 |
| CHB | chr1 | NBPF11 | 144452151 | 0 |
| CHB | chr1 | NBPF11 | 144502151 | 0 |
| CHB | chr1 | NBPF11 | 144552151 | 0 |
| CHB | chr1 | NBPF11 | 144602151 | 0 |
| CHB | chr1 | NBPF11 | 144652151 | 0 |
| CHB | chr1 | NBPF11 | 144702151 | 0 |
| CHB | chr1 | NBPF11 | 144752151 | 0 |
| CHB | chr1 | NBPF11 | 144802151 | 0 |
| CHB | chr1 | NBPF11 | 144852151 | 0 |
| CHB | chr1 | NBPF11 | 144902151 | 0 |
| CHB | chr1 | NBPF11 | 144952151 | 0 |
| CHB | chr1 | NBPF11 | 145002151 | 0 |
| CHB | chr1 | NBPF11 | 145052151 | 0 |
| CHB | chr1 | NBPF11 | 145102151 | 0 |
| CHB | chr1 | NBPF11 | 145152151 | 0 |
| CHB | chr1 | NBPF11 | 145202151 | 0 |
| CHB | chr1 | NBPF11 | 145252151 | 0 |
| CHB | chr1 | NBPF11 | 145302151 | 0 |
| CHB | chr1 | NBPF11 | 145352151 | 0 |
| CHB | chr1 | NBPF11 | 145402151 | 0 |
| CHB | chr1 | NBPF11 | 145452151 | 0 |
| CHB | chr1 | NBPF11 | 145502151 | 0 |
| CHB | chr1 | NBPF11 | 145552151 | 0 |
| CHB | chr1 | NBPF11 | 145602151 | 0 |
| CHB | chr1 | NBPF11 | 145652151 | 0 |
| CHB | chr1 | NBPF11 | 145702151 | 0 |
| CHB | chr1 | NBPF11 | 145752151 | 0 |
| CHB | chr1 | NBPF11 | 145802151 | 0 |
| CHB | chr1 | NBPF11 | 145852151 | 0 |
| CHB | chr1 | NBPF11 | 145902151 | 0 |

## 3\_Introgression\_data

|     |      |        |           |   |
|-----|------|--------|-----------|---|
| CHB | chr1 | NBPF11 | 145952151 | 0 |
| CHB | chr1 | NBPF11 | 146002151 | 0 |
| CHB | chr1 | NBPF11 | 146052151 | 0 |
| CHB | chr1 | NBPF11 | 146102151 | 0 |
| CHB | chr1 | NBPF11 | 146152151 | 0 |
| CHB | chr1 | NBPF11 | 146202151 | 0 |
| CHB | chr1 | NBPF11 | 146252151 | 0 |
| CHB | chr1 | NBPF11 | 146302151 | 0 |
| CHB | chr1 | NBPF11 | 146352151 | 0 |
| CHB | chr1 | NBPF11 | 146402151 | 0 |
| CHB | chr1 | NBPF11 | 146452151 | 0 |
| CHB | chr1 | NBPF11 | 146502151 | 0 |
| CHB | chr1 | NBPF11 | 146552151 | 0 |
| CHB | chr1 | NBPF11 | 146602151 | 0 |
| CHB | chr1 | NBPF11 | 146652151 | 0 |
| CHB | chr1 | NBPF11 | 146702151 | 0 |
| CHB | chr1 | NBPF11 | 146752151 | 0 |
| CHB | chr1 | NBPF11 | 146802151 | 0 |
| CHB | chr1 | NBPF11 | 146852151 | 0 |
| CHB | chr1 | NBPF11 | 146902151 | 0 |
| CHB | chr1 | NBPF11 | 146952151 | 0 |
| CHB | chr1 | NBPF11 | 147002151 | 0 |
| CHB | chr1 | NBPF11 | 147052151 | 0 |
| CHB | chr1 | NBPF11 | 147102151 | 0 |
| CHB | chr1 | NBPF11 | 147152151 | 0 |
| CHB | chr1 | NBPF11 | 147202151 | 0 |
| CHB | chr1 | NBPF11 | 147252151 | 0 |
| CHB | chr1 | NBPF11 | 147302151 | 0 |
| CHB | chr1 | NBPF11 | 147352151 | 0 |
| CHB | chr1 | NBPF11 | 147402151 | 0 |
| CHB | chr1 | NBPF11 | 147452151 | 0 |
| CHB | chr1 | NBPF11 | 147502151 | 0 |
| CHB | chr1 | NBPF11 | 147552151 | 0 |
| CHB | chr1 | NBPF11 | 147602151 | 0 |
| CHB | chr1 | NBPF11 | 147652151 | 0 |
| CHB | chr1 | NBPF11 | 147702151 | 0 |
| CHB | chr1 | NBPF11 | 147752151 | 0 |
| CHB | chr1 | NBPF11 | 147802151 | 0 |
| CHB | chr1 | NBPF11 | 147852151 | 0 |
| CHB | chr1 | NBPF11 | 147902151 | 0 |
| CHB | chr1 | NBPF11 | 147952151 | 0 |
| CHB | chr1 | NBPF11 | 148002151 | 0 |
| CHB | chr1 | NBPF11 | 148052151 | 0 |
| CHB | chr1 | NBPF11 | 148102151 | 0 |
| CHB | chr1 | NBPF11 | 148152151 | 0 |
| CHB | chr1 | NBPF11 | 148202151 | 0 |
| CHB | chr1 | NBPF11 | 148252151 | 0 |
| CHB | chr1 | NBPF11 | 148302151 | 0 |
| CHB | chr1 | NBPF11 | 148352151 | 0 |

### 3\_Introgression\_data

|     |      |        |           |    |
|-----|------|--------|-----------|----|
| CHB | chr1 | NBPF11 | 148402151 | 0  |
| CHB | chr1 | NBPF11 | 148452151 | 0  |
| CHB | chr1 | NBPF11 | 148502151 | 0  |
| CHB | chr1 | NBPF11 | 148552151 | 0  |
| CHB | chr1 | NBPF11 | 148602151 | 0  |
| CHB | chr1 | NBPF11 | 148652151 | 0  |
| CHB | chr1 | NBPF11 | 148702151 | 0  |
| CHB | chr1 | NBPF11 | 148752151 | 0  |
| CHB | chr1 | NBPF11 | 148802151 | 0  |
| CHB | chr1 | NBPF11 | 148852151 | 0  |
| CHB | chr1 | NBPF11 | 148902151 | 0  |
| CHB | chr1 | NBPF11 | 148952151 | 0  |
| CHB | chr1 | NBPF11 | 149002151 | 0  |
| CHB | chr1 | NBPF11 | 149052151 | 0  |
| CHB | chr1 | NBPF11 | 149102151 | 0  |
| CHB | chr1 | NBPF11 | 149152151 | 0  |
| CHB | chr1 | NBPF11 | 149202151 | 0  |
| CHB | chr1 | NBPF11 | 149252151 | 0  |
| CHB | chr1 | NBPF11 | 149302151 | 0  |
| CHB | chr1 | NBPF11 | 149352151 | 0  |
| CHB | chr1 | NBPF11 | 149402151 | 0  |
| CHB | chr1 | NBPF11 | 149452151 | 0  |
| CHB | chr1 | NBPF11 | 149502151 | 0  |
| CHB | chr1 | NBPF11 | 149552151 | 0  |
| CHB | chr1 | NBPF11 | 149602151 | 0  |
| CHB | chr1 | NBPF11 | 149652151 | 0  |
| CHB | chr1 | NBPF11 | 149702151 | 0  |
| CHB | chr1 | NBPF11 | 149752151 | 0  |
| CHB | chr1 | NBPF11 | 149802151 | 0  |
| CHB | chr1 | NBPF11 | 149852151 | 9  |
| CHB | chr1 | NBPF11 | 149902151 | 25 |
| CHB | chr1 | NBPF11 | 149952151 | 36 |
| CHB | chr1 | NBPF11 | 150002151 | 36 |
| CHB | chr1 | NBPF11 | 150052151 | 35 |
| CHB | chr1 | NBPF11 | 150102151 | 44 |
| CHB | chr1 | NBPF11 | 150152151 | 37 |
| CHB | chr1 | NBPF11 | 150202151 | 32 |
| CHB | chr1 | NBPF11 | 150252151 | 29 |
| CHB | chr1 | NBPF11 | 150302151 | 23 |
| CHB | chr1 | NBPF11 | 150352151 | 29 |
| CHB | chr1 | NBPF11 | 150402151 | 22 |
| CHB | chr1 | NBPF11 | 150452151 | 17 |
| CHB | chr1 | NBPF11 | 150502151 | 26 |
| CHB | chr1 | NBPF11 | 150552151 | 40 |
| CHB | chr1 | NBPF11 | 150602151 | 53 |
| CHB | chr1 | NBPF11 | 150652151 | 49 |
| CHB | chr1 | NBPF11 | 150702151 | 41 |
| CHB | chr1 | NBPF11 | 150752151 | 46 |
| CHB | chr1 | NBPF11 | 150802151 | 41 |



### 3\_Introgression\_data

|     |      |        |           |    |
|-----|------|--------|-----------|----|
| CHB | chr1 | NBPF11 | 150852151 | 43 |
| CHB | chr1 | NBPF11 | 150902151 | 42 |
| CHB | chr1 | NBPF11 | 150952151 | 30 |
| CHB | chr1 | NBPF11 | 151002151 | 15 |
| CHB | chr1 | NBPF11 | 151052151 | 0  |
| CHB | chr1 | NBPF11 | 151102151 | 0  |
| CHB | chr1 | NBPF11 | 151152151 | 0  |
| CHB | chr1 | NBPF11 | 151202151 | 0  |
| CHB | chr1 | NBPF11 | 151252151 | 0  |
| CHB | chr1 | NBPF11 | 151302151 | 0  |
| CHB | chr1 | NBPF11 | 151352151 | 0  |
| CHB | chr1 | NBPF11 | 151402151 | 0  |
| CHB | chr1 | NBPF11 | 151452151 | 0  |
| CHB | chr1 | NBPF11 | 151502151 | 0  |
| CHB | chr1 | NBPF11 | 151552151 | 0  |
| CHB | chr1 | NBPF11 | 151602151 | 0  |
| CHB | chr1 | NBPF11 | 151652151 | 0  |
| CHB | chr1 | NBPF11 | 151702151 | 8  |
| CHB | chr1 | NBPF11 | 151752151 | 17 |
| CHB | chr1 | NBPF11 | 151802151 | 22 |
| CHB | chr1 | NBPF11 | 151852151 | 28 |
| CHB | chr1 | NBPF11 | 151902151 | 27 |
| CHB | chr1 | NBPF11 | 151952151 | 40 |
| CHB | chr1 | NBPF11 | 152002151 | 68 |
| CHB | chr1 | NBPF11 | 152052151 | 88 |
| CHB | chr1 | NBPF11 | 152102151 | 79 |
| CHB | chr1 | NBPF11 | 152152151 | 61 |
| CHB | chr1 | NBPF11 | 152202151 | 54 |
| CHB | chr1 | NBPF11 | 152252151 | 55 |
| CHB | chr1 | NBPF11 | 152302151 | 40 |
| CHB | chr1 | NBPF11 | 152352151 | 23 |
| CHB | chr1 | NBPF11 | 152402151 | 33 |
| CHB | chr1 | NBPF11 | 152452151 | 38 |
| CHB | chr1 | NBPF11 | 152502151 | 29 |
| CHB | chr1 | NBPF11 | 152552151 | 10 |
| CHB | chr1 | NBPF11 | 152602151 | 0  |
| CHB | chr1 | NBPF11 | 152652151 | 0  |
| CHB | chr1 | NBPF11 | 152702151 | 0  |
| CHB | chr1 | NBPF11 | 152752151 | 0  |
| CHB | chr1 | NBPF11 | 152802151 | 0  |
| CHB | chr1 | NBPF11 | 152852151 | 7  |
| CHB | chr1 | NBPF11 | 152902151 | 66 |
| CHB | chr1 | NBPF11 | 152952151 | 73 |
| CHB | chr1 | NBPF11 | 153002151 | 44 |
| CHB | chr1 | NBPF11 | 153052151 | 50 |
| CHB | chr1 | NBPF11 | 153102151 | 41 |
| CHB | chr1 | NBPF16 | 139471390 | 0  |
| CHB | chr1 | NBPF16 | 139521390 | 0  |
| CHB | chr1 | NBPF16 | 139571390 | 0  |

## 3\_Introgression\_data

|     |      |        |           |   |
|-----|------|--------|-----------|---|
| CHB | chr1 | NBPF16 | 139621390 | 0 |
| CHB | chr1 | NBPF16 | 139671390 | 0 |
| CHB | chr1 | NBPF16 | 139721390 | 0 |
| CHB | chr1 | NBPF16 | 139771390 | 0 |
| CHB | chr1 | NBPF16 | 139821390 | 0 |
| CHB | chr1 | NBPF16 | 139871390 | 0 |
| CHB | chr1 | NBPF16 | 139921390 | 0 |
| CHB | chr1 | NBPF16 | 139971390 | 0 |
| CHB | chr1 | NBPF16 | 140021390 | 0 |
| CHB | chr1 | NBPF16 | 140071390 | 0 |
| CHB | chr1 | NBPF16 | 140121390 | 0 |
| CHB | chr1 | NBPF16 | 140171390 | 0 |
| CHB | chr1 | NBPF16 | 140221390 | 0 |
| CHB | chr1 | NBPF16 | 140271390 | 0 |
| CHB | chr1 | NBPF16 | 140321390 | 0 |
| CHB | chr1 | NBPF16 | 140371390 | 0 |
| CHB | chr1 | NBPF16 | 140421390 | 0 |
| CHB | chr1 | NBPF16 | 140471390 | 0 |
| CHB | chr1 | NBPF16 | 140521390 | 0 |
| CHB | chr1 | NBPF16 | 140571390 | 0 |
| CHB | chr1 | NBPF16 | 140621390 | 0 |
| CHB | chr1 | NBPF16 | 140671390 | 0 |
| CHB | chr1 | NBPF16 | 140721390 | 0 |
| CHB | chr1 | NBPF16 | 140771390 | 0 |
| CHB | chr1 | NBPF16 | 140821390 | 0 |
| CHB | chr1 | NBPF16 | 140871390 | 0 |
| CHB | chr1 | NBPF16 | 140921390 | 0 |
| CHB | chr1 | NBPF16 | 140971390 | 0 |
| CHB | chr1 | NBPF16 | 141021390 | 0 |
| CHB | chr1 | NBPF16 | 141071390 | 0 |
| CHB | chr1 | NBPF16 | 141121390 | 0 |
| CHB | chr1 | NBPF16 | 141171390 | 0 |
| CHB | chr1 | NBPF16 | 141221390 | 0 |
| CHB | chr1 | NBPF16 | 141271390 | 0 |
| CHB | chr1 | NBPF16 | 141321390 | 0 |
| CHB | chr1 | NBPF16 | 141371390 | 0 |
| CHB | chr1 | NBPF16 | 141421390 | 0 |
| CHB | chr1 | NBPF16 | 141471390 | 0 |
| CHB | chr1 | NBPF16 | 141521390 | 0 |
| CHB | chr1 | NBPF16 | 141571390 | 0 |
| CHB | chr1 | NBPF16 | 141621390 | 0 |
| CHB | chr1 | NBPF16 | 141671390 | 0 |
| CHB | chr1 | NBPF16 | 141721390 | 0 |
| CHB | chr1 | NBPF16 | 141771390 | 0 |
| CHB | chr1 | NBPF16 | 141821390 | 0 |
| CHB | chr1 | NBPF16 | 141871390 | 0 |
| CHB | chr1 | NBPF16 | 141921390 | 0 |
| CHB | chr1 | NBPF16 | 141971390 | 0 |
| CHB | chr1 | NBPF16 | 142021390 | 0 |

## 3\_Introgression\_data

|     |      |        |           |   |
|-----|------|--------|-----------|---|
| CHB | chr1 | NBPF16 | 142071390 | 0 |
| CHB | chr1 | NBPF16 | 142121390 | 0 |
| CHB | chr1 | NBPF16 | 142171390 | 0 |
| CHB | chr1 | NBPF16 | 142221390 | 0 |
| CHB | chr1 | NBPF16 | 142271390 | 0 |
| CHB | chr1 | NBPF16 | 142321390 | 0 |
| CHB | chr1 | NBPF16 | 142371390 | 0 |
| CHB | chr1 | NBPF16 | 142421390 | 0 |
| CHB | chr1 | NBPF16 | 142471390 | 0 |
| CHB | chr1 | NBPF16 | 142521390 | 0 |
| CHB | chr1 | NBPF16 | 142571390 | 0 |
| CHB | chr1 | NBPF16 | 142621390 | 0 |
| CHB | chr1 | NBPF16 | 142671390 | 0 |
| CHB | chr1 | NBPF16 | 142721390 | 0 |
| CHB | chr1 | NBPF16 | 142771390 | 0 |
| CHB | chr1 | NBPF16 | 142821390 | 0 |
| CHB | chr1 | NBPF16 | 142871390 | 0 |
| CHB | chr1 | NBPF16 | 142921390 | 0 |
| CHB | chr1 | NBPF16 | 142971390 | 0 |
| CHB | chr1 | NBPF16 | 143021390 | 0 |
| CHB | chr1 | NBPF16 | 143071390 | 0 |
| CHB | chr1 | NBPF16 | 143121390 | 0 |
| CHB | chr1 | NBPF16 | 143171390 | 0 |
| CHB | chr1 | NBPF16 | 143221390 | 0 |
| CHB | chr1 | NBPF16 | 143271390 | 0 |
| CHB | chr1 | NBPF16 | 143321390 | 0 |
| CHB | chr1 | NBPF16 | 143371390 | 0 |
| CHB | chr1 | NBPF16 | 143421390 | 0 |
| CHB | chr1 | NBPF16 | 143471390 | 0 |
| CHB | chr1 | NBPF16 | 143521390 | 0 |
| CHB | chr1 | NBPF16 | 143571390 | 0 |
| CHB | chr1 | NBPF16 | 143621390 | 0 |
| CHB | chr1 | NBPF16 | 143671390 | 0 |
| CHB | chr1 | NBPF16 | 143721390 | 0 |
| CHB | chr1 | NBPF16 | 143771390 | 0 |
| CHB | chr1 | NBPF16 | 143821390 | 0 |
| CHB | chr1 | NBPF16 | 143871390 | 0 |
| CHB | chr1 | NBPF16 | 143921390 | 0 |
| CHB | chr1 | NBPF16 | 143971390 | 0 |
| CHB | chr1 | NBPF16 | 144021390 | 0 |
| CHB | chr1 | NBPF16 | 144071390 | 0 |
| CHB | chr1 | NBPF16 | 144121390 | 0 |
| CHB | chr1 | NBPF16 | 144171390 | 0 |
| CHB | chr1 | NBPF16 | 144221390 | 0 |
| CHB | chr1 | NBPF16 | 144271390 | 0 |
| CHB | chr1 | NBPF16 | 144321390 | 0 |
| CHB | chr1 | NBPF16 | 144371390 | 0 |
| CHB | chr1 | NBPF16 | 144421390 | 0 |
| CHB | chr1 | NBPF16 | 144471390 | 0 |

## 3\_Introgression\_data

|     |      |        |           |   |
|-----|------|--------|-----------|---|
| CHB | chr1 | NBPF16 | 144521390 | 0 |
| CHB | chr1 | NBPF16 | 144571390 | 0 |
| CHB | chr1 | NBPF16 | 144621390 | 0 |
| CHB | chr1 | NBPF16 | 144671390 | 0 |
| CHB | chr1 | NBPF16 | 144721390 | 0 |
| CHB | chr1 | NBPF16 | 144771390 | 0 |
| CHB | chr1 | NBPF16 | 144821390 | 0 |
| CHB | chr1 | NBPF16 | 144871390 | 0 |
| CHB | chr1 | NBPF16 | 144921390 | 0 |
| CHB | chr1 | NBPF16 | 144971390 | 0 |
| CHB | chr1 | NBPF16 | 145021390 | 0 |
| CHB | chr1 | NBPF16 | 145071390 | 0 |
| CHB | chr1 | NBPF16 | 145121390 | 0 |
| CHB | chr1 | NBPF16 | 145171390 | 0 |
| CHB | chr1 | NBPF16 | 145221390 | 0 |
| CHB | chr1 | NBPF16 | 145271390 | 0 |
| CHB | chr1 | NBPF16 | 145321390 | 0 |
| CHB | chr1 | NBPF16 | 145371390 | 0 |
| CHB | chr1 | NBPF16 | 145421390 | 0 |
| CHB | chr1 | NBPF16 | 145471390 | 0 |
| CHB | chr1 | NBPF16 | 145521390 | 0 |
| CHB | chr1 | NBPF16 | 145571390 | 0 |
| CHB | chr1 | NBPF16 | 145621390 | 0 |
| CHB | chr1 | NBPF16 | 145671390 | 0 |
| CHB | chr1 | NBPF16 | 145721390 | 0 |
| CHB | chr1 | NBPF16 | 145771390 | 0 |
| CHB | chr1 | NBPF16 | 145821390 | 0 |
| CHB | chr1 | NBPF16 | 145871390 | 0 |
| CHB | chr1 | NBPF16 | 145921390 | 0 |
| CHB | chr1 | NBPF16 | 145971390 | 0 |
| CHB | chr1 | NBPF16 | 146021390 | 0 |
| CHB | chr1 | NBPF16 | 146071390 | 0 |
| CHB | chr1 | NBPF16 | 146121390 | 0 |
| CHB | chr1 | NBPF16 | 146171390 | 0 |
| CHB | chr1 | NBPF16 | 146221390 | 0 |
| CHB | chr1 | NBPF16 | 146271390 | 0 |
| CHB | chr1 | NBPF16 | 146321390 | 0 |
| CHB | chr1 | NBPF16 | 146371390 | 0 |
| CHB | chr1 | NBPF16 | 146421390 | 0 |
| CHB | chr1 | NBPF16 | 146471390 | 0 |
| CHB | chr1 | NBPF16 | 146521390 | 0 |
| CHB | chr1 | NBPF16 | 146571390 | 0 |
| CHB | chr1 | NBPF16 | 146621390 | 0 |
| CHB | chr1 | NBPF16 | 146671390 | 0 |
| CHB | chr1 | NBPF16 | 146721390 | 0 |
| CHB | chr1 | NBPF16 | 146771390 | 0 |
| CHB | chr1 | NBPF16 | 146821390 | 0 |
| CHB | chr1 | NBPF16 | 146871390 | 0 |
| CHB | chr1 | NBPF16 | 146921390 | 0 |

## 3\_Introgression\_data

|     |      |        |           |   |
|-----|------|--------|-----------|---|
| CHB | chr1 | NBPF16 | 146971390 | 0 |
| CHB | chr1 | NBPF16 | 147021390 | 0 |
| CHB | chr1 | NBPF16 | 147071390 | 0 |
| CHB | chr1 | NBPF16 | 147121390 | 0 |
| CHB | chr1 | NBPF16 | 147171390 | 0 |
| CHB | chr1 | NBPF16 | 147221390 | 0 |
| CHB | chr1 | NBPF16 | 147271390 | 0 |
| CHB | chr1 | NBPF16 | 147321390 | 0 |
| CHB | chr1 | NBPF16 | 147371390 | 0 |
| CHB | chr1 | NBPF16 | 147421390 | 0 |
| CHB | chr1 | NBPF16 | 147471390 | 0 |
| CHB | chr1 | NBPF16 | 147521390 | 0 |
| CHB | chr1 | NBPF16 | 147571390 | 0 |
| CHB | chr1 | NBPF16 | 147621390 | 0 |
| CHB | chr1 | NBPF16 | 147671390 | 0 |
| CHB | chr1 | NBPF16 | 147721390 | 0 |
| CHB | chr1 | NBPF16 | 147771390 | 0 |
| CHB | chr1 | NBPF16 | 147821390 | 0 |
| CHB | chr1 | NBPF16 | 147871390 | 0 |
| CHB | chr1 | NBPF16 | 147921390 | 0 |
| CHB | chr1 | NBPF16 | 147971390 | 0 |
| CHB | chr1 | NBPF16 | 148021390 | 0 |
| CHB | chr1 | NBPF16 | 148071390 | 0 |
| CHB | chr1 | NBPF16 | 148121390 | 0 |
| CHB | chr1 | NBPF16 | 148171390 | 0 |
| CHB | chr1 | NBPF16 | 148221390 | 0 |
| CHB | chr1 | NBPF16 | 148271390 | 0 |
| CHB | chr1 | NBPF16 | 148321390 | 0 |
| CHB | chr1 | NBPF16 | 148371390 | 0 |
| CHB | chr1 | NBPF16 | 148421390 | 0 |
| CHB | chr1 | NBPF16 | 148471390 | 0 |
| CHB | chr1 | NBPF16 | 148521390 | 0 |
| CHB | chr1 | NBPF16 | 148571390 | 0 |
| CHB | chr1 | NBPF16 | 148621390 | 0 |
| CHB | chr1 | NBPF16 | 148671390 | 0 |
| CHB | chr1 | NBPF16 | 148721390 | 0 |
| CHB | chr1 | NBPF16 | 148771390 | 0 |
| CHB | chr1 | NBPF16 | 148821390 | 0 |
| CHB | chr1 | NBPF16 | 148871390 | 0 |
| CHB | chr1 | NBPF16 | 148921390 | 0 |
| CHB | chr1 | NBPF16 | 148971390 | 0 |
| CHB | chr1 | NBPF16 | 149021390 | 0 |
| CHB | chr1 | NBPF16 | 149071390 | 0 |
| CHB | chr1 | NBPF16 | 149121390 | 0 |
| CHB | chr1 | NBPF16 | 149171390 | 0 |
| CHB | chr1 | NBPF16 | 149221390 | 0 |
| CHB | chr1 | NBPF16 | 149271390 | 0 |
| CHB | chr1 | NBPF16 | 149321390 | 0 |
| CHB | chr1 | NBPF16 | 149371390 | 0 |

3\_Introgression\_data

|     |      |      |          |    |
|-----|------|------|----------|----|
| CHB | chr1 | NPIP | 39271070 | 0  |
| CHB | chr1 | NPIP | 39321070 | 0  |
| CHB | chr1 | NPIP | 39371070 | 11 |
| CHB | chr1 | NPIP | 39421070 | 27 |
| CHB | chr1 | NPIP | 39471070 | 33 |
| CHB | chr1 | NPIP | 39521070 | 31 |
| CHB | chr1 | NPIP | 39571070 | 26 |
| CHB | chr1 | NPIP | 39621070 | 24 |
| CHB | chr1 | NPIP | 39671070 | 29 |
| CHB | chr1 | NPIP | 39721070 | 28 |
| CHB | chr1 | NPIP | 39771070 | 24 |
| CHB | chr1 | NPIP | 39821070 | 28 |
| CHB | chr1 | NPIP | 39871070 | 24 |
| CHB | chr1 | NPIP | 39921070 | 22 |
| CHB | chr1 | NPIP | 39971070 | 24 |
| CHB | chr1 | NPIP | 40021070 | 27 |
| CHB | chr1 | NPIP | 40071070 | 27 |
| CHB | chr1 | NPIP | 40121070 | 26 |
| CHB | chr1 | NPIP | 40171070 | 29 |
| CHB | chr1 | NPIP | 40221070 | 60 |
| CHB | chr1 | NPIP | 40271070 | 70 |
| CHB | chr1 | NPIP | 40321070 | 31 |
| CHB | chr1 | NPIP | 40371070 | 27 |
| CHB | chr1 | NPIP | 40421070 | 32 |
| CHB | chr1 | NPIP | 40471070 | 25 |
| CHB | chr1 | NPIP | 40521070 | 28 |
| CHB | chr1 | NPIP | 40571070 | 27 |
| CHB | chr1 | NPIP | 40621070 | 27 |
| CHB | chr1 | NPIP | 40671070 | 26 |
| CHB | chr1 | NPIP | 40721070 | 21 |
| CHB | chr1 | NPIP | 40771070 | 28 |
| CHB | chr1 | NPIP | 40821070 | 18 |
| CHB | chr1 | NPIP | 40871070 | 0  |
| CHB | chr1 | NPIP | 40921070 | 0  |
| CHB | chr1 | NPIP | 40971070 | 0  |
| CHB | chr1 | NPIP | 41021070 | 0  |
| CHB | chr1 | NPIP | 41071070 | 0  |
| CHB | chr1 | NPIP | 41121070 | 0  |
| CHB | chr1 | NPIP | 41171070 | 0  |
| CHB | chr1 | NPIP | 41221070 | 0  |
| CHB | chr1 | NPIP | 41271070 | 0  |
| CHB | chr1 | NPIP | 41321070 | 0  |
| CHB | chr1 | NPIP | 41371070 | 0  |
| CHB | chr1 | NPIP | 41421070 | 0  |
| CHB | chr1 | NPIP | 41471070 | 0  |
| CHB | chr1 | NPIP | 41521070 | 0  |
| CHB | chr1 | NPIP | 41571070 | 0  |
| CHB | chr1 | NPIP | 41621070 | 0  |
| CHB | chr1 | NPIP | 41671070 | 0  |

3\_Introgression\_data

|     |      |      |          |    |
|-----|------|------|----------|----|
| CHB | chr1 | NPIP | 41721070 | 0  |
| CHB | chr1 | NPIP | 41771070 | 0  |
| CHB | chr1 | NPIP | 41821070 | 0  |
| CHB | chr1 | NPIP | 41871070 | 0  |
| CHB | chr1 | NPIP | 41921070 | 0  |
| CHB | chr1 | NPIP | 41971070 | 25 |
| CHB | chr1 | NPIP | 42021070 | 42 |
| CHB | chr1 | NPIP | 42071070 | 33 |
| CHB | chr1 | NPIP | 42121070 | 16 |
| CHB | chr1 | NPIP | 42171070 | 0  |
| CHB | chr1 | NPIP | 42221070 | 0  |
| CHB | chr1 | NPIP | 42271070 | 0  |
| CHB | chr1 | NPIP | 42321070 | 0  |
| CHB | chr1 | NPIP | 42371070 | 0  |
| CHB | chr1 | NPIP | 42421070 | 0  |
| CHB | chr1 | NPIP | 42471070 | 0  |
| CHB | chr1 | NPIP | 42521070 | 0  |
| CHB | chr1 | NPIP | 42571070 | 0  |
| CHB | chr1 | NPIP | 42621070 | 0  |
| CHB | chr1 | NPIP | 42671070 | 0  |
| CHB | chr1 | NPIP | 42721070 | 0  |
| CHB | chr1 | NPIP | 42771070 | 0  |
| CHB | chr1 | NPIP | 42821070 | 0  |
| CHB | chr1 | NPIP | 42871070 | 0  |
| CHB | chr1 | NPIP | 42921070 | 0  |
| CHB | chr1 | NPIP | 42971070 | 0  |
| CHB | chr1 | NPIP | 43021070 | 0  |
| CHB | chr1 | NPIP | 43071070 | 0  |
| CHB | chr1 | NPIP | 43121070 | 0  |
| CHB | chr1 | NPIP | 43171070 | 0  |
| CHB | chr1 | NPIP | 43221070 | 0  |
| CHB | chr1 | NPIP | 43271070 | 0  |
| CHB | chr1 | NPIP | 43321070 | 0  |
| CHB | chr1 | NPIP | 43371070 | 0  |
| CHB | chr1 | NPIP | 43421070 | 4  |
| CHB | chr1 | NPIP | 43471070 | 25 |
| CHB | chr1 | NPIP | 43521070 | 23 |
| CHB | chr1 | NPIP | 43571070 | 2  |
| CHB | chr1 | NPIP | 43621070 | 0  |
| CHB | chr1 | NPIP | 43671070 | 0  |
| CHB | chr1 | NPIP | 43721070 | 0  |
| CHB | chr1 | NPIP | 43771070 | 0  |
| CHB | chr1 | NPIP | 43821070 | 0  |
| CHB | chr1 | NPIP | 43871070 | 0  |
| CHB | chr1 | NPIP | 43921070 | 0  |
| CHB | chr1 | NPIP | 43971070 | 0  |
| CHB | chr1 | NPIP | 44021070 | 0  |
| CHB | chr1 | NPIP | 44071070 | 0  |
| CHB | chr1 | NPIP | 44121070 | 0  |

### 3\_Introgression\_data

|     |      |      |          |   |
|-----|------|------|----------|---|
| CHB | chr1 | NPIP | 44171070 | 0 |
| CHB | chr1 | NPIP | 44221070 | 0 |
| CHB | chr1 | NPIP | 44271070 | 0 |
| CHB | chr1 | NPIP | 44321070 | 0 |
| CHB | chr1 | NPIP | 44371070 | 0 |
| CHB | chr1 | NPIP | 44421070 | 0 |
| CHB | chr1 | NPIP | 44471070 | 0 |
| CHB | chr1 | NPIP | 44521070 | 0 |
| CHB | chr1 | NPIP | 44571070 | 0 |
| CHB | chr1 | NPIP | 44621070 | 0 |
| CHB | chr1 | NPIP | 44671070 | 0 |
| CHB | chr1 | NPIP | 44721070 | 0 |
| CHB | chr1 | NPIP | 44771070 | 0 |
| CHB | chr1 | NPIP | 44821070 | 0 |
| CHB | chr1 | NPIP | 44871070 | 0 |
| CHB | chr1 | NPIP | 44921070 | 0 |
| CHB | chr1 | NPIP | 44971070 | 0 |
| CHB | chr1 | NPIP | 45021070 | 0 |
| CHB | chr1 | NPIP | 45071070 | 0 |
| CHB | chr1 | NPIP | 45121070 | 0 |
| CHB | chr1 | NPIP | 45171070 | 0 |
| CHB | chr1 | NPIP | 45221070 | 0 |
| CHB | chr1 | NPIP | 45271070 | 0 |
| CHB | chr1 | NPIP | 45321070 | 0 |
| CHB | chr1 | NPIP | 45371070 | 0 |
| CHB | chr1 | NPIP | 45421070 | 0 |
| CHB | chr1 | NPIP | 45471070 | 0 |
| CHB | chr1 | NPIP | 45521070 | 0 |
| CHB | chr1 | NPIP | 45571070 | 0 |
| CHB | chr1 | NPIP | 45621070 | 0 |
| CHB | chr1 | NPIP | 45671070 | 0 |
| CHB | chr1 | NPIP | 45721070 | 0 |
| CHB | chr1 | NPIP | 45771070 | 0 |
| CHB | chr1 | NPIP | 45821070 | 0 |
| CHB | chr1 | NPIP | 45871070 | 0 |
| CHB | chr1 | NPIP | 45921070 | 0 |
| CHB | chr1 | NPIP | 45971070 | 0 |
| CHB | chr1 | NPIP | 46021070 | 0 |
| CHB | chr1 | NPIP | 46071070 | 0 |
| CHB | chr1 | NPIP | 46121070 | 0 |
| CHB | chr1 | NPIP | 46171070 | 0 |
| CHB | chr1 | NPIP | 46221070 | 0 |
| CHB | chr1 | NPIP | 46271070 | 0 |
| CHB | chr1 | NPIP | 46321070 | 0 |
| CHB | chr1 | NPIP | 46371070 | 0 |
| CHB | chr1 | NPIP | 46421070 | 0 |
| CHB | chr1 | NPIP | 46471070 | 0 |
| CHB | chr1 | NPIP | 46521070 | 0 |
| CHB | chr1 | NPIP | 46571070 | 0 |



### 3\_Introgression\_data

|     |      |      |          |     |
|-----|------|------|----------|-----|
| CHB | chr1 | NPIP | 46621070 | 5   |
| CHB | chr1 | NPIP | 46671070 | 40  |
| CHB | chr1 | NPIP | 46721070 | 58  |
| CHB | chr1 | NPIP | 46771070 | 65  |
| CHB | chr1 | NPIP | 46821070 | 53  |
| CHB | chr1 | NPIP | 46871070 | 122 |
| CHB | chr1 | NPIP | 46921070 | 130 |
| CHB | chr1 | NPIP | 46971070 | 37  |
| CHB | chr1 | NPIP | 47021070 | 68  |
| CHB | chr1 | NPIP | 47071070 | 63  |
| CHB | chr1 | NPIP | 47121070 | 25  |
| CHB | chr1 | NPIP | 47171070 | 37  |
| CHB | chr1 | NPIP | 47221070 | 37  |
| CHB | chr1 | NPIP | 47271070 | 33  |
| CHB | chr1 | NPIP | 47321070 | 51  |
| CHB | chr1 | NPIP | 47371070 | 58  |
| CHB | chr1 | NPIP | 47421070 | 55  |
| CHB | chr1 | NPIP | 47471070 | 47  |
| CHB | chr1 | NPIP | 47521070 | 31  |
| CHB | chr1 | NPIP | 47571070 | 32  |
| CHB | chr1 | NPIP | 47621070 | 36  |
| CHB | chr1 | NPIP | 47671070 | 38  |
| CHB | chr1 | NPIP | 47721070 | 34  |
| CHB | chr1 | NPIP | 47771070 | 11  |
| CHB | chr1 | NPIP | 47821070 | 0   |
| CHB | chr1 | NPIP | 47871070 | 0   |
| CHB | chr1 | NPIP | 47921070 | 8   |
| CHB | chr1 | NPIP | 47971070 | 55  |
| CHB | chr1 | NPIP | 48021070 | 63  |
| CHB | chr1 | NPIP | 48071070 | 27  |
| CHB | chr1 | NPIP | 48121070 | 11  |
| CHB | chr1 | NPIP | 48171070 | 0   |
| CHB | chr1 | NPIP | 48221070 | 0   |
| CHB | chr1 | NPIP | 48271070 | 0   |
| CHB | chr1 | NPIP | 48321070 | 0   |
| CHB | chr1 | NPIP | 48371070 | 0   |
| CHB | chr1 | NPIP | 48421070 | 0   |
| CHB | chr1 | NPIP | 48471070 | 0   |
| CHB | chr1 | NPIP | 48521070 | 0   |
| CHB | chr1 | NPIP | 48571070 | 0   |
| CHB | chr1 | NPIP | 48621070 | 0   |
| CHB | chr1 | NPIP | 48671070 | 0   |
| CHB | chr1 | NPIP | 48721070 | 0   |
| CHB | chr1 | NPIP | 48771070 | 0   |
| CHB | chr1 | NPIP | 48821070 | 0   |
| CHB | chr1 | NPIP | 48871070 | 0   |
| CHB | chr1 | NPIP | 48921070 | 0   |
| CHB | chr1 | NPIP | 48971070 | 0   |
| CHB | chr1 | NPIP | 49021070 | 0   |

3\_Introgression\_data

|     |       |      |          |    |
|-----|-------|------|----------|----|
| CHB | chr1  | NPIP | 49071070 | 0  |
| CHB | chr1  | NPIP | 49121070 | 0  |
| CHB | chr1  | NPIP | 49171070 | 0  |
| CHB | chr1  | NPIP | 49221070 | 0  |
| CHB | chr1  | NPIP | 49271070 | 0  |
| CHB | chr16 | NPIP | 6977263  | 0  |
| CHB | chr16 | NPIP | 7027263  | 0  |
| CHB | chr16 | NPIP | 7077263  | 0  |
| CHB | chr16 | NPIP | 7127263  | 0  |
| CHB | chr16 | NPIP | 7177263  | 0  |
| CHB | chr16 | NPIP | 7227263  | 0  |
| CHB | chr16 | NPIP | 7277263  | 0  |
| CHB | chr16 | NPIP | 7327263  | 0  |
| CHB | chr16 | NPIP | 7377263  | 0  |
| CHB | chr16 | NPIP | 7427263  | 0  |
| CHB | chr16 | NPIP | 7477263  | 0  |
| CHB | chr16 | NPIP | 7527263  | 0  |
| CHB | chr16 | NPIP | 7577263  | 0  |
| CHB | chr16 | NPIP | 7627263  | 0  |
| CHB | chr16 | NPIP | 7677263  | 0  |
| CHB | chr16 | NPIP | 7727263  | 0  |
| CHB | chr16 | NPIP | 7777263  | 3  |
| CHB | chr16 | NPIP | 7827263  | 19 |
| CHB | chr16 | NPIP | 7877263  | 49 |
| CHB | chr16 | NPIP | 7927263  | 33 |
| CHB | chr16 | NPIP | 7977263  | 0  |
| CHB | chr16 | NPIP | 8027263  | 0  |
| CHB | chr16 | NPIP | 8077263  | 0  |
| CHB | chr16 | NPIP | 8127263  | 0  |
| CHB | chr16 | NPIP | 8177263  | 0  |
| CHB | chr16 | NPIP | 8227263  | 0  |
| CHB | chr16 | NPIP | 8277263  | 0  |
| CHB | chr16 | NPIP | 8327263  | 0  |
| CHB | chr16 | NPIP | 8377263  | 0  |
| CHB | chr16 | NPIP | 8427263  | 0  |
| CHB | chr16 | NPIP | 8477263  | 0  |
| CHB | chr16 | NPIP | 8527263  | 0  |
| CHB | chr16 | NPIP | 8577263  | 0  |
| CHB | chr16 | NPIP | 8627263  | 0  |
| CHB | chr16 | NPIP | 8677263  | 0  |
| CHB | chr16 | NPIP | 8727263  | 0  |
| CHB | chr16 | NPIP | 8777263  | 0  |
| CHB | chr16 | NPIP | 8827263  | 0  |
| CHB | chr16 | NPIP | 8877263  | 0  |
| CHB | chr16 | NPIP | 8927263  | 8  |
| CHB | chr16 | NPIP | 8977263  | 29 |
| CHB | chr16 | NPIP | 9027263  | 45 |
| CHB | chr16 | NPIP | 9077263  | 58 |
| CHB | chr16 | NPIP | 9127263  | 60 |

## 3\_Introgression\_data

|     |       |      |          |    |
|-----|-------|------|----------|----|
| CHB | chr16 | NPIP | 9177263  | 26 |
| CHB | chr16 | NPIP | 9227263  | 0  |
| CHB | chr16 | NPIP | 9277263  | 0  |
| CHB | chr16 | NPIP | 9327263  | 0  |
| CHB | chr16 | NPIP | 9377263  | 0  |
| CHB | chr16 | NPIP | 9427263  | 0  |
| CHB | chr16 | NPIP | 9477263  | 0  |
| CHB | chr16 | NPIP | 9527263  | 0  |
| CHB | chr16 | NPIP | 9577263  | 0  |
| CHB | chr16 | NPIP | 9627263  | 0  |
| CHB | chr16 | NPIP | 9677263  | 0  |
| CHB | chr16 | NPIP | 9727263  | 0  |
| CHB | chr16 | NPIP | 9777263  | 0  |
| CHB | chr16 | NPIP | 9827263  | 0  |
| CHB | chr16 | NPIP | 9877263  | 0  |
| CHB | chr16 | NPIP | 9927263  | 0  |
| CHB | chr16 | NPIP | 9977263  | 0  |
| CHB | chr16 | NPIP | 10027263 | 0  |
| CHB | chr16 | NPIP | 10077263 | 0  |
| CHB | chr16 | NPIP | 10127263 | 0  |
| CHB | chr16 | NPIP | 10177263 | 0  |
| CHB | chr16 | NPIP | 10227263 | 0  |
| CHB | chr16 | NPIP | 10277263 | 0  |
| CHB | chr16 | NPIP | 10327263 | 0  |
| CHB | chr16 | NPIP | 10377263 | 0  |
| CHB | chr16 | NPIP | 10427263 | 0  |
| CHB | chr16 | NPIP | 10477263 | 0  |
| CHB | chr16 | NPIP | 10527263 | 0  |
| CHB | chr16 | NPIP | 10577263 | 0  |
| CHB | chr16 | NPIP | 10627263 | 0  |
| CHB | chr16 | NPIP | 10677263 | 0  |
| CHB | chr16 | NPIP | 10727263 | 0  |
| CHB | chr16 | NPIP | 10777263 | 0  |
| CHB | chr16 | NPIP | 10827263 | 0  |
| CHB | chr16 | NPIP | 10877263 | 0  |
| CHB | chr16 | NPIP | 10927263 | 0  |
| CHB | chr16 | NPIP | 10977263 | 0  |
| CHB | chr16 | NPIP | 11027263 | 0  |
| CHB | chr16 | NPIP | 11077263 | 0  |
| CHB | chr16 | NPIP | 11127263 | 0  |
| CHB | chr16 | NPIP | 11177263 | 0  |
| CHB | chr16 | NPIP | 11227263 | 0  |
| CHB | chr16 | NPIP | 11277263 | 0  |
| CHB | chr16 | NPIP | 11327263 | 0  |
| CHB | chr16 | NPIP | 11377263 | 0  |
| CHB | chr16 | NPIP | 11427263 | 0  |
| CHB | chr16 | NPIP | 11477263 | 0  |
| CHB | chr16 | NPIP | 11527263 | 0  |
| CHB | chr16 | NPIP | 11577263 | 0  |

## 3\_Introgression\_data

|     |       |      |          |   |
|-----|-------|------|----------|---|
| CHB | chr16 | NPIP | 11627263 | 0 |
| CHB | chr16 | NPIP | 11677263 | 0 |
| CHB | chr16 | NPIP | 11727263 | 0 |
| CHB | chr16 | NPIP | 11777263 | 0 |
| CHB | chr16 | NPIP | 11827263 | 0 |
| CHB | chr16 | NPIP | 11877263 | 0 |
| CHB | chr16 | NPIP | 11927263 | 0 |
| CHB | chr16 | NPIP | 11977263 | 0 |
| CHB | chr16 | NPIP | 12027263 | 0 |
| CHB | chr16 | NPIP | 12077263 | 0 |
| CHB | chr16 | NPIP | 12127263 | 0 |
| CHB | chr16 | NPIP | 12177263 | 0 |
| CHB | chr16 | NPIP | 12227263 | 0 |
| CHB | chr16 | NPIP | 12277263 | 0 |
| CHB | chr16 | NPIP | 12327263 | 0 |
| CHB | chr16 | NPIP | 12377263 | 0 |
| CHB | chr16 | NPIP | 12427263 | 0 |
| CHB | chr16 | NPIP | 12477263 | 0 |
| CHB | chr16 | NPIP | 12527263 | 0 |
| CHB | chr16 | NPIP | 12577263 | 0 |
| CHB | chr16 | NPIP | 12627263 | 0 |
| CHB | chr16 | NPIP | 12677263 | 0 |
| CHB | chr16 | NPIP | 12727263 | 0 |
| CHB | chr16 | NPIP | 12777263 | 0 |
| CHB | chr16 | NPIP | 12827263 | 0 |
| CHB | chr16 | NPIP | 12877263 | 0 |
| CHB | chr16 | NPIP | 12927263 | 0 |
| CHB | chr16 | NPIP | 12977263 | 0 |
| CHB | chr16 | NPIP | 13027263 | 0 |
| CHB | chr16 | NPIP | 13077263 | 0 |
| CHB | chr16 | NPIP | 13127263 | 0 |
| CHB | chr16 | NPIP | 13177263 | 0 |
| CHB | chr16 | NPIP | 13227263 | 0 |
| CHB | chr16 | NPIP | 13277263 | 0 |
| CHB | chr16 | NPIP | 13327263 | 0 |
| CHB | chr16 | NPIP | 13377263 | 0 |
| CHB | chr16 | NPIP | 13427263 | 0 |
| CHB | chr16 | NPIP | 13477263 | 0 |
| CHB | chr16 | NPIP | 13527263 | 0 |
| CHB | chr16 | NPIP | 13577263 | 0 |
| CHB | chr16 | NPIP | 13627263 | 0 |
| CHB | chr16 | NPIP | 13677263 | 0 |
| CHB | chr16 | NPIP | 13727263 | 0 |
| CHB | chr16 | NPIP | 13777263 | 0 |
| CHB | chr16 | NPIP | 13827263 | 0 |
| CHB | chr16 | NPIP | 13877263 | 0 |
| CHB | chr16 | NPIP | 13927263 | 0 |
| CHB | chr16 | NPIP | 13977263 | 0 |
| CHB | chr16 | NPIP | 14027263 | 0 |

## 3\_Introgression\_data

|     |       |      |          |   |
|-----|-------|------|----------|---|
| CHB | chr16 | NPIP | 14077263 | 0 |
| CHB | chr16 | NPIP | 14127263 | 0 |
| CHB | chr16 | NPIP | 14177263 | 0 |
| CHB | chr16 | NPIP | 14227263 | 0 |
| CHB | chr16 | NPIP | 14277263 | 0 |
| CHB | chr16 | NPIP | 14327263 | 0 |
| CHB | chr16 | NPIP | 14377263 | 0 |
| CHB | chr16 | NPIP | 14427263 | 0 |
| CHB | chr16 | NPIP | 14477263 | 0 |
| CHB | chr16 | NPIP | 14527263 | 0 |
| CHB | chr16 | NPIP | 14577263 | 0 |
| CHB | chr16 | NPIP | 14627263 | 0 |
| CHB | chr16 | NPIP | 14677263 | 0 |
| CHB | chr16 | NPIP | 14727263 | 0 |
| CHB | chr16 | NPIP | 14777263 | 0 |
| CHB | chr16 | NPIP | 14827263 | 0 |
| CHB | chr16 | NPIP | 14877263 | 0 |
| CHB | chr16 | NPIP | 14927263 | 0 |
| CHB | chr16 | NPIP | 14977263 | 0 |
| CHB | chr16 | NPIP | 15027263 | 0 |
| CHB | chr16 | NPIP | 15077263 | 0 |
| CHB | chr16 | NPIP | 15127263 | 0 |
| CHB | chr16 | NPIP | 15177263 | 0 |
| CHB | chr16 | NPIP | 15227263 | 0 |
| CHB | chr16 | NPIP | 15277263 | 0 |
| CHB | chr16 | NPIP | 15327263 | 0 |
| CHB | chr16 | NPIP | 15377263 | 0 |
| CHB | chr16 | NPIP | 15427263 | 0 |
| CHB | chr16 | NPIP | 15477263 | 0 |
| CHB | chr16 | NPIP | 15527263 | 0 |
| CHB | chr16 | NPIP | 15577263 | 0 |
| CHB | chr16 | NPIP | 15627263 | 0 |
| CHB | chr16 | NPIP | 15677263 | 0 |
| CHB | chr16 | NPIP | 15727263 | 0 |
| CHB | chr16 | NPIP | 15777263 | 0 |
| CHB | chr16 | NPIP | 15827263 | 0 |
| CHB | chr16 | NPIP | 15877263 | 0 |
| CHB | chr16 | NPIP | 15927263 | 0 |
| CHB | chr16 | NPIP | 15977263 | 0 |
| CHB | chr16 | NPIP | 16027263 | 0 |
| CHB | chr16 | NPIP | 16077263 | 0 |
| CHB | chr16 | NPIP | 16127263 | 0 |
| CHB | chr16 | NPIP | 16177263 | 0 |
| CHB | chr16 | NPIP | 16227263 | 0 |
| CHB | chr16 | NPIP | 16277263 | 0 |
| CHB | chr16 | NPIP | 16327263 | 0 |
| CHB | chr16 | NPIP | 16377263 | 0 |
| CHB | chr16 | NPIP | 16427263 | 0 |
| CHB | chr16 | NPIP | 16477263 | 0 |

## 3\_Introgression\_data

|     |       |      |          |   |
|-----|-------|------|----------|---|
| CHB | chr16 | NPIP | 16527263 | 0 |
| CHB | chr16 | NPIP | 16577263 | 0 |
| CHB | chr16 | NPIP | 16627263 | 0 |
| CHB | chr16 | NPIP | 16677263 | 0 |
| CHB | chr16 | NPIP | 16727263 | 0 |
| CHB | chr16 | NPIP | 16777263 | 0 |
| CHB | chr16 | NPIP | 16827263 | 0 |
| CHB | chr16 | NPIP | 16877263 | 0 |
| CHB | chr16 | NPIP | 9753411  | 0 |
| CHB | chr16 | NPIP | 9803411  | 0 |
| CHB | chr16 | NPIP | 9853411  | 0 |
| CHB | chr16 | NPIP | 9903411  | 0 |
| CHB | chr16 | NPIP | 9953411  | 0 |
| CHB | chr16 | NPIP | 10003411 | 0 |
| CHB | chr16 | NPIP | 10053411 | 0 |
| CHB | chr16 | NPIP | 10103411 | 0 |
| CHB | chr16 | NPIP | 10153411 | 0 |
| CHB | chr16 | NPIP | 10203411 | 0 |
| CHB | chr16 | NPIP | 10253411 | 0 |
| CHB | chr16 | NPIP | 10303411 | 0 |
| CHB | chr16 | NPIP | 10353411 | 0 |
| CHB | chr16 | NPIP | 10403411 | 0 |
| CHB | chr16 | NPIP | 10453411 | 0 |
| CHB | chr16 | NPIP | 10503411 | 0 |
| CHB | chr16 | NPIP | 10553411 | 0 |
| CHB | chr16 | NPIP | 10603411 | 0 |
| CHB | chr16 | NPIP | 10653411 | 0 |
| CHB | chr16 | NPIP | 10703411 | 0 |
| CHB | chr16 | NPIP | 10753411 | 0 |
| CHB | chr16 | NPIP | 10803411 | 0 |
| CHB | chr16 | NPIP | 10853411 | 0 |
| CHB | chr16 | NPIP | 10903411 | 0 |
| CHB | chr16 | NPIP | 10953411 | 0 |
| CHB | chr16 | NPIP | 11003411 | 0 |
| CHB | chr16 | NPIP | 11053411 | 0 |
| CHB | chr16 | NPIP | 11103411 | 0 |
| CHB | chr16 | NPIP | 11153411 | 0 |
| CHB | chr16 | NPIP | 11203411 | 0 |
| CHB | chr16 | NPIP | 11253411 | 0 |
| CHB | chr16 | NPIP | 11303411 | 0 |
| CHB | chr16 | NPIP | 11353411 | 0 |
| CHB | chr16 | NPIP | 11403411 | 0 |
| CHB | chr16 | NPIP | 11453411 | 0 |
| CHB | chr16 | NPIP | 11503411 | 0 |
| CHB | chr16 | NPIP | 11553411 | 0 |
| CHB | chr16 | NPIP | 11603411 | 0 |
| CHB | chr16 | NPIP | 11653411 | 0 |
| CHB | chr16 | NPIP | 11703411 | 0 |
| CHB | chr16 | NPIP | 11753411 | 0 |

## 3\_Introgression\_data

|     |       |      |          |   |
|-----|-------|------|----------|---|
| CHB | chr16 | NPIP | 11803411 | 0 |
| CHB | chr16 | NPIP | 11853411 | 0 |
| CHB | chr16 | NPIP | 11903411 | 0 |
| CHB | chr16 | NPIP | 11953411 | 0 |
| CHB | chr16 | NPIP | 12003411 | 0 |
| CHB | chr16 | NPIP | 12053411 | 0 |
| CHB | chr16 | NPIP | 12103411 | 0 |
| CHB | chr16 | NPIP | 12153411 | 0 |
| CHB | chr16 | NPIP | 12203411 | 0 |
| CHB | chr16 | NPIP | 12253411 | 0 |
| CHB | chr16 | NPIP | 12303411 | 0 |
| CHB | chr16 | NPIP | 12353411 | 0 |
| CHB | chr16 | NPIP | 12403411 | 0 |
| CHB | chr16 | NPIP | 12453411 | 0 |
| CHB | chr16 | NPIP | 12503411 | 0 |
| CHB | chr16 | NPIP | 12553411 | 0 |
| CHB | chr16 | NPIP | 12603411 | 0 |
| CHB | chr16 | NPIP | 12653411 | 0 |
| CHB | chr16 | NPIP | 12703411 | 0 |
| CHB | chr16 | NPIP | 12753411 | 0 |
| CHB | chr16 | NPIP | 12803411 | 0 |
| CHB | chr16 | NPIP | 12853411 | 0 |
| CHB | chr16 | NPIP | 12903411 | 0 |
| CHB | chr16 | NPIP | 12953411 | 0 |
| CHB | chr16 | NPIP | 13003411 | 0 |
| CHB | chr16 | NPIP | 13053411 | 0 |
| CHB | chr16 | NPIP | 13103411 | 0 |
| CHB | chr16 | NPIP | 13153411 | 0 |
| CHB | chr16 | NPIP | 13203411 | 0 |
| CHB | chr16 | NPIP | 13253411 | 0 |
| CHB | chr16 | NPIP | 13303411 | 0 |
| CHB | chr16 | NPIP | 13353411 | 0 |
| CHB | chr16 | NPIP | 13403411 | 0 |
| CHB | chr16 | NPIP | 13453411 | 0 |
| CHB | chr16 | NPIP | 13503411 | 0 |
| CHB | chr16 | NPIP | 13553411 | 0 |
| CHB | chr16 | NPIP | 13603411 | 0 |
| CHB | chr16 | NPIP | 13653411 | 0 |
| CHB | chr16 | NPIP | 13703411 | 0 |
| CHB | chr16 | NPIP | 13753411 | 0 |
| CHB | chr16 | NPIP | 13803411 | 0 |
| CHB | chr16 | NPIP | 13853411 | 0 |
| CHB | chr16 | NPIP | 13903411 | 0 |
| CHB | chr16 | NPIP | 13953411 | 0 |
| CHB | chr16 | NPIP | 14003411 | 0 |
| CHB | chr16 | NPIP | 14053411 | 0 |
| CHB | chr16 | NPIP | 14103411 | 0 |
| CHB | chr16 | NPIP | 14153411 | 0 |
| CHB | chr16 | NPIP | 14203411 | 0 |

## 3\_Introgression\_data

|     |       |      |          |   |
|-----|-------|------|----------|---|
| CHB | chr16 | NPIP | 14253411 | 0 |
| CHB | chr16 | NPIP | 14303411 | 0 |
| CHB | chr16 | NPIP | 14353411 | 0 |
| CHB | chr16 | NPIP | 14403411 | 0 |
| CHB | chr16 | NPIP | 14453411 | 0 |
| CHB | chr16 | NPIP | 14503411 | 0 |
| CHB | chr16 | NPIP | 14553411 | 0 |
| CHB | chr16 | NPIP | 14603411 | 0 |
| CHB | chr16 | NPIP | 14653411 | 0 |
| CHB | chr16 | NPIP | 14703411 | 0 |
| CHB | chr16 | NPIP | 14753411 | 0 |
| CHB | chr16 | NPIP | 14803411 | 0 |
| CHB | chr16 | NPIP | 14853411 | 0 |
| CHB | chr16 | NPIP | 14903411 | 0 |
| CHB | chr16 | NPIP | 14953411 | 0 |
| CHB | chr16 | NPIP | 15003411 | 0 |
| CHB | chr16 | NPIP | 15053411 | 0 |
| CHB | chr16 | NPIP | 15103411 | 0 |
| CHB | chr16 | NPIP | 15153411 | 0 |
| CHB | chr16 | NPIP | 15203411 | 0 |
| CHB | chr16 | NPIP | 15253411 | 0 |
| CHB | chr16 | NPIP | 15303411 | 0 |
| CHB | chr16 | NPIP | 15353411 | 0 |
| CHB | chr16 | NPIP | 15403411 | 0 |
| CHB | chr16 | NPIP | 15453411 | 0 |
| CHB | chr16 | NPIP | 15503411 | 0 |
| CHB | chr16 | NPIP | 15553411 | 0 |
| CHB | chr16 | NPIP | 15603411 | 0 |
| CHB | chr16 | NPIP | 15653411 | 0 |
| CHB | chr16 | NPIP | 15703411 | 0 |
| CHB | chr16 | NPIP | 15753411 | 0 |
| CHB | chr16 | NPIP | 15803411 | 0 |
| CHB | chr16 | NPIP | 15853411 | 0 |
| CHB | chr16 | NPIP | 15903411 | 0 |
| CHB | chr16 | NPIP | 15953411 | 0 |
| CHB | chr16 | NPIP | 16003411 | 0 |
| CHB | chr16 | NPIP | 16053411 | 0 |
| CHB | chr16 | NPIP | 16103411 | 0 |
| CHB | chr16 | NPIP | 16153411 | 0 |
| CHB | chr16 | NPIP | 16203411 | 0 |
| CHB | chr16 | NPIP | 16253411 | 0 |
| CHB | chr16 | NPIP | 16303411 | 0 |
| CHB | chr16 | NPIP | 16353411 | 0 |
| CHB | chr16 | NPIP | 16403411 | 0 |
| CHB | chr16 | NPIP | 16453411 | 0 |
| CHB | chr16 | NPIP | 16503411 | 0 |
| CHB | chr16 | NPIP | 16553411 | 0 |
| CHB | chr16 | NPIP | 16603411 | 0 |
| CHB | chr16 | NPIP | 16653411 | 0 |



## 3\_Introgression\_data

|     |       |      |          |   |
|-----|-------|------|----------|---|
| CHB | chr16 | NPIP | 16703411 | 0 |
| CHB | chr16 | NPIP | 16753411 | 0 |
| CHB | chr16 | NPIP | 16803411 | 0 |
| CHB | chr16 | NPIP | 16853411 | 0 |
| CHB | chr16 | NPIP | 16903411 | 0 |
| CHB | chr16 | NPIP | 16953411 | 0 |
| CHB | chr16 | NPIP | 17003411 | 0 |
| CHB | chr16 | NPIP | 17053411 | 0 |
| CHB | chr16 | NPIP | 17103411 | 0 |
| CHB | chr16 | NPIP | 17153411 | 0 |
| CHB | chr16 | NPIP | 17203411 | 0 |
| CHB | chr16 | NPIP | 17253411 | 0 |
| CHB | chr16 | NPIP | 17303411 | 0 |
| CHB | chr16 | NPIP | 17353411 | 0 |
| CHB | chr16 | NPIP | 17403411 | 0 |
| CHB | chr16 | NPIP | 17453411 | 0 |
| CHB | chr16 | NPIP | 17503411 | 0 |
| CHB | chr16 | NPIP | 17553411 | 0 |
| CHB | chr16 | NPIP | 17603411 | 0 |
| CHB | chr16 | NPIP | 17653411 | 0 |
| CHB | chr16 | NPIP | 17703411 | 0 |
| CHB | chr16 | NPIP | 17753411 | 0 |
| CHB | chr16 | NPIP | 17803411 | 0 |
| CHB | chr16 | NPIP | 17853411 | 0 |
| CHB | chr16 | NPIP | 17903411 | 0 |
| CHB | chr16 | NPIP | 17953411 | 0 |
| CHB | chr16 | NPIP | 18003411 | 0 |
| CHB | chr16 | NPIP | 18053411 | 0 |
| CHB | chr16 | NPIP | 18103411 | 0 |
| CHB | chr16 | NPIP | 18153411 | 0 |
| CHB | chr16 | NPIP | 18203411 | 0 |
| CHB | chr16 | NPIP | 18253411 | 0 |
| CHB | chr16 | NPIP | 18303411 | 0 |
| CHB | chr16 | NPIP | 18353411 | 0 |
| CHB | chr16 | NPIP | 18403411 | 0 |
| CHB | chr16 | NPIP | 18453411 | 0 |
| CHB | chr16 | NPIP | 18503411 | 0 |
| CHB | chr16 | NPIP | 18553411 | 0 |
| CHB | chr16 | NPIP | 18603411 | 0 |
| CHB | chr16 | NPIP | 18653411 | 0 |
| CHB | chr16 | NPIP | 18703411 | 0 |
| CHB | chr16 | NPIP | 18753411 | 0 |
| CHB | chr16 | NPIP | 18803411 | 0 |
| CHB | chr16 | NPIP | 18853411 | 0 |
| CHB | chr16 | NPIP | 18903411 | 0 |
| CHB | chr16 | NPIP | 18953411 | 0 |
| CHB | chr16 | NPIP | 19003411 | 0 |
| CHB | chr16 | NPIP | 19053411 | 0 |
| CHB | chr16 | NPIP | 19103411 | 0 |

## 3\_Introgression\_data

|     |       |      |          |   |
|-----|-------|------|----------|---|
| CHB | chr16 | NPIP | 19153411 | 0 |
| CHB | chr16 | NPIP | 19203411 | 0 |
| CHB | chr16 | NPIP | 19253411 | 0 |
| CHB | chr16 | NPIP | 19303411 | 0 |
| CHB | chr16 | NPIP | 19353411 | 0 |
| CHB | chr16 | NPIP | 19403411 | 0 |
| CHB | chr16 | NPIP | 19453411 | 0 |
| CHB | chr16 | NPIP | 19503411 | 0 |
| CHB | chr16 | NPIP | 19553411 | 0 |
| CHB | chr16 | NPIP | 19603411 | 0 |
| CHB | chr16 | NPIP | 19653411 | 0 |
| CHB | chr16 | NPIP | 13367919 | 0 |
| CHB | chr16 | NPIP | 13417919 | 0 |
| CHB | chr16 | NPIP | 13467919 | 0 |
| CHB | chr16 | NPIP | 13517919 | 0 |
| CHB | chr16 | NPIP | 13567919 | 0 |
| CHB | chr16 | NPIP | 13617919 | 0 |
| CHB | chr16 | NPIP | 13667919 | 0 |
| CHB | chr16 | NPIP | 13717919 | 0 |
| CHB | chr16 | NPIP | 13767919 | 0 |
| CHB | chr16 | NPIP | 13817919 | 0 |
| CHB | chr16 | NPIP | 13867919 | 0 |
| CHB | chr16 | NPIP | 13917919 | 0 |
| CHB | chr16 | NPIP | 13967919 | 0 |
| CHB | chr16 | NPIP | 14017919 | 0 |
| CHB | chr16 | NPIP | 14067919 | 0 |
| CHB | chr16 | NPIP | 14117919 | 0 |
| CHB | chr16 | NPIP | 14167919 | 0 |
| CHB | chr16 | NPIP | 14217919 | 0 |
| CHB | chr16 | NPIP | 14267919 | 0 |
| CHB | chr16 | NPIP | 14317919 | 0 |
| CHB | chr16 | NPIP | 14367919 | 0 |
| CHB | chr16 | NPIP | 14417919 | 0 |
| CHB | chr16 | NPIP | 14467919 | 0 |
| CHB | chr16 | NPIP | 14517919 | 0 |
| CHB | chr16 | NPIP | 14567919 | 0 |
| CHB | chr16 | NPIP | 14617919 | 0 |
| CHB | chr16 | NPIP | 14667919 | 0 |
| CHB | chr16 | NPIP | 14717919 | 0 |
| CHB | chr16 | NPIP | 14767919 | 0 |
| CHB | chr16 | NPIP | 14817919 | 0 |
| CHB | chr16 | NPIP | 14867919 | 0 |
| CHB | chr16 | NPIP | 14917919 | 0 |
| CHB | chr16 | NPIP | 14967919 | 0 |
| CHB | chr16 | NPIP | 15017919 | 0 |
| CHB | chr16 | NPIP | 15067919 | 0 |
| CHB | chr16 | NPIP | 15117919 | 0 |
| CHB | chr16 | NPIP | 15167919 | 0 |
| CHB | chr16 | NPIP | 15217919 | 0 |

## 3\_Introgression\_data

|     |       |      |          |   |
|-----|-------|------|----------|---|
| CHB | chr16 | NPIP | 15267919 | 0 |
| CHB | chr16 | NPIP | 15317919 | 0 |
| CHB | chr16 | NPIP | 15367919 | 0 |
| CHB | chr16 | NPIP | 15417919 | 0 |
| CHB | chr16 | NPIP | 15467919 | 0 |
| CHB | chr16 | NPIP | 15517919 | 0 |
| CHB | chr16 | NPIP | 15567919 | 0 |
| CHB | chr16 | NPIP | 15617919 | 0 |
| CHB | chr16 | NPIP | 15667919 | 0 |
| CHB | chr16 | NPIP | 15717919 | 0 |
| CHB | chr16 | NPIP | 15767919 | 0 |
| CHB | chr16 | NPIP | 15817919 | 0 |
| CHB | chr16 | NPIP | 15867919 | 0 |
| CHB | chr16 | NPIP | 15917919 | 0 |
| CHB | chr16 | NPIP | 15967919 | 0 |
| CHB | chr16 | NPIP | 16017919 | 0 |
| CHB | chr16 | NPIP | 16067919 | 0 |
| CHB | chr16 | NPIP | 16117919 | 0 |
| CHB | chr16 | NPIP | 16167919 | 0 |
| CHB | chr16 | NPIP | 16217919 | 0 |
| CHB | chr16 | NPIP | 16267919 | 0 |
| CHB | chr16 | NPIP | 16317919 | 0 |
| CHB | chr16 | NPIP | 16367919 | 0 |
| CHB | chr16 | NPIP | 16417919 | 0 |
| CHB | chr16 | NPIP | 16467919 | 0 |
| CHB | chr16 | NPIP | 16517919 | 0 |
| CHB | chr16 | NPIP | 16567919 | 0 |
| CHB | chr16 | NPIP | 16617919 | 0 |
| CHB | chr16 | NPIP | 16667919 | 0 |
| CHB | chr16 | NPIP | 16717919 | 0 |
| CHB | chr16 | NPIP | 16767919 | 0 |
| CHB | chr16 | NPIP | 16817919 | 0 |
| CHB | chr16 | NPIP | 16867919 | 0 |
| CHB | chr16 | NPIP | 16917919 | 0 |
| CHB | chr16 | NPIP | 16967919 | 0 |
| CHB | chr16 | NPIP | 17017919 | 0 |
| CHB | chr16 | NPIP | 17067919 | 0 |
| CHB | chr16 | NPIP | 17117919 | 0 |
| CHB | chr16 | NPIP | 17167919 | 0 |
| CHB | chr16 | NPIP | 17217919 | 0 |
| CHB | chr16 | NPIP | 17267919 | 0 |
| CHB | chr16 | NPIP | 17317919 | 0 |
| CHB | chr16 | NPIP | 17367919 | 0 |
| CHB | chr16 | NPIP | 17417919 | 0 |
| CHB | chr16 | NPIP | 17467919 | 0 |
| CHB | chr16 | NPIP | 17517919 | 0 |
| CHB | chr16 | NPIP | 17567919 | 0 |
| CHB | chr16 | NPIP | 17617919 | 0 |
| CHB | chr16 | NPIP | 17667919 | 0 |

## 3\_Introgression\_data

|     |       |      |          |   |
|-----|-------|------|----------|---|
| CHB | chr16 | NPIP | 17717919 | 0 |
| CHB | chr16 | NPIP | 17767919 | 0 |
| CHB | chr16 | NPIP | 17817919 | 0 |
| CHB | chr16 | NPIP | 17867919 | 0 |
| CHB | chr16 | NPIP | 17917919 | 0 |
| CHB | chr16 | NPIP | 17967919 | 0 |
| CHB | chr16 | NPIP | 18017919 | 0 |
| CHB | chr16 | NPIP | 18067919 | 0 |
| CHB | chr16 | NPIP | 18117919 | 0 |
| CHB | chr16 | NPIP | 18167919 | 0 |
| CHB | chr16 | NPIP | 18217919 | 0 |
| CHB | chr16 | NPIP | 18267919 | 0 |
| CHB | chr16 | NPIP | 18317919 | 0 |
| CHB | chr16 | NPIP | 18367919 | 0 |
| CHB | chr16 | NPIP | 18417919 | 0 |
| CHB | chr16 | NPIP | 18467919 | 0 |
| CHB | chr16 | NPIP | 18517919 | 0 |
| CHB | chr16 | NPIP | 18567919 | 0 |
| CHB | chr16 | NPIP | 18617919 | 0 |
| CHB | chr16 | NPIP | 18667919 | 0 |
| CHB | chr16 | NPIP | 18717919 | 0 |
| CHB | chr16 | NPIP | 18767919 | 0 |
| CHB | chr16 | NPIP | 18817919 | 0 |
| CHB | chr16 | NPIP | 18867919 | 0 |
| CHB | chr16 | NPIP | 18917919 | 0 |
| CHB | chr16 | NPIP | 18967919 | 0 |
| CHB | chr16 | NPIP | 19017919 | 0 |
| CHB | chr16 | NPIP | 19067919 | 0 |
| CHB | chr16 | NPIP | 19117919 | 0 |
| CHB | chr16 | NPIP | 19167919 | 0 |
| CHB | chr16 | NPIP | 19217919 | 0 |
| CHB | chr16 | NPIP | 19267919 | 0 |
| CHB | chr16 | NPIP | 19317919 | 0 |
| CHB | chr16 | NPIP | 19367919 | 0 |
| CHB | chr16 | NPIP | 19417919 | 0 |
| CHB | chr16 | NPIP | 19467919 | 0 |
| CHB | chr16 | NPIP | 19517919 | 0 |
| CHB | chr16 | NPIP | 19567919 | 0 |
| CHB | chr16 | NPIP | 19617919 | 0 |
| CHB | chr16 | NPIP | 19667919 | 0 |
| CHB | chr16 | NPIP | 19717919 | 0 |
| CHB | chr16 | NPIP | 19767919 | 0 |
| CHB | chr16 | NPIP | 19817919 | 0 |
| CHB | chr16 | NPIP | 19867919 | 0 |
| CHB | chr16 | NPIP | 19917919 | 0 |
| CHB | chr16 | NPIP | 19967919 | 0 |
| CHB | chr16 | NPIP | 20017919 | 0 |
| CHB | chr16 | NPIP | 20067919 | 0 |
| CHB | chr16 | NPIP | 20117919 | 0 |

3\_Introgression\_data

|     |       |      |          |    |
|-----|-------|------|----------|----|
| CHB | chr16 | NPIP | 20167919 | 0  |
| CHB | chr16 | NPIP | 20217919 | 0  |
| CHB | chr16 | NPIP | 20267919 | 0  |
| CHB | chr16 | NPIP | 20317919 | 0  |
| CHB | chr16 | NPIP | 20367919 | 0  |
| CHB | chr16 | NPIP | 20417919 | 0  |
| CHB | chr16 | NPIP | 20467919 | 0  |
| CHB | chr16 | NPIP | 20517919 | 0  |
| CHB | chr16 | NPIP | 20567919 | 0  |
| CHB | chr16 | NPIP | 20617919 | 0  |
| CHB | chr16 | NPIP | 20667919 | 0  |
| CHB | chr16 | NPIP | 20717919 | 0  |
| CHB | chr16 | NPIP | 20767919 | 0  |
| CHB | chr16 | NPIP | 20817919 | 0  |
| CHB | chr16 | NPIP | 20867919 | 0  |
| CHB | chr16 | NPIP | 20917919 | 0  |
| CHB | chr16 | NPIP | 20967919 | 0  |
| CHB | chr16 | NPIP | 21017919 | 0  |
| CHB | chr16 | NPIP | 21067919 | 0  |
| CHB | chr16 | NPIP | 21117919 | 0  |
| CHB | chr16 | NPIP | 21167919 | 0  |
| CHB | chr16 | NPIP | 21217919 | 2  |
| CHB | chr16 | NPIP | 21267919 | 36 |
| CHB | chr16 | NPIP | 21317919 | 49 |
| CHB | chr16 | NPIP | 21367919 | 23 |
| CHB | chr16 | NPIP | 21417919 | 8  |
| CHB | chr16 | NPIP | 21467919 | 0  |
| CHB | chr16 | NPIP | 21517919 | 39 |
| CHB | chr16 | NPIP | 21567919 | 69 |
| CHB | chr16 | NPIP | 21617919 | 82 |
| CHB | chr16 | NPIP | 21667919 | 68 |
| CHB | chr16 | NPIP | 21717919 | 20 |
| CHB | chr16 | NPIP | 21767919 | 4  |
| CHB | chr16 | NPIP | 21817919 | 0  |
| CHB | chr16 | NPIP | 21867919 | 0  |
| CHB | chr16 | NPIP | 21917919 | 0  |
| CHB | chr16 | NPIP | 21967919 | 0  |
| CHB | chr16 | NPIP | 22017919 | 0  |
| CHB | chr16 | NPIP | 22067919 | 0  |
| CHB | chr16 | NPIP | 22117919 | 0  |
| CHB | chr16 | NPIP | 22167919 | 0  |
| CHB | chr16 | NPIP | 22217919 | 0  |
| CHB | chr16 | NPIP | 22267919 | 0  |
| CHB | chr16 | NPIP | 22317919 | 0  |
| CHB | chr16 | NPIP | 22367919 | 0  |
| CHB | chr16 | NPIP | 22417919 | 0  |
| CHB | chr16 | NPIP | 22467919 | 0  |
| CHB | chr16 | NPIP | 22517919 | 0  |
| CHB | chr16 | NPIP | 22567919 | 0  |

## 3\_Introgression\_data

|     |       |      |          |   |
|-----|-------|------|----------|---|
| CHB | chr16 | NPIP | 22617919 | 0 |
| CHB | chr16 | NPIP | 22667919 | 0 |
| CHB | chr16 | NPIP | 22717919 | 0 |
| CHB | chr16 | NPIP | 22767919 | 0 |
| CHB | chr16 | NPIP | 22817919 | 0 |
| CHB | chr16 | NPIP | 22867919 | 0 |
| CHB | chr16 | NPIP | 22917919 | 0 |
| CHB | chr16 | NPIP | 22967919 | 0 |
| CHB | chr16 | NPIP | 23017919 | 0 |
| CHB | chr16 | NPIP | 23067919 | 0 |
| CHB | chr16 | NPIP | 23117919 | 0 |
| CHB | chr16 | NPIP | 23167919 | 0 |
| CHB | chr16 | NPIP | 23217919 | 0 |
| CHB | chr16 | NPIP | 23267919 | 0 |
| CHB | chr16 | NPIP | 17553599 | 0 |
| CHB | chr16 | NPIP | 17603599 | 0 |
| CHB | chr16 | NPIP | 17653599 | 0 |
| CHB | chr16 | NPIP | 17703599 | 0 |
| CHB | chr16 | NPIP | 17753599 | 0 |
| CHB | chr16 | NPIP | 17803599 | 0 |
| CHB | chr16 | NPIP | 17853599 | 0 |
| CHB | chr16 | NPIP | 17903599 | 0 |
| CHB | chr16 | NPIP | 17953599 | 0 |
| CHB | chr16 | NPIP | 18003599 | 0 |
| CHB | chr16 | NPIP | 18053599 | 0 |
| CHB | chr16 | NPIP | 18103599 | 0 |
| CHB | chr16 | NPIP | 18153599 | 0 |
| CHB | chr16 | NPIP | 18203599 | 0 |
| CHB | chr16 | NPIP | 18253599 | 0 |
| CHB | chr16 | NPIP | 18303599 | 0 |
| CHB | chr16 | NPIP | 18353599 | 0 |
| CHB | chr16 | NPIP | 18403599 | 0 |
| CHB | chr16 | NPIP | 18453599 | 0 |
| CHB | chr16 | NPIP | 18503599 | 0 |
| CHB | chr16 | NPIP | 18553599 | 0 |
| CHB | chr16 | NPIP | 18603599 | 0 |
| CHB | chr16 | NPIP | 18653599 | 0 |
| CHB | chr16 | NPIP | 18703599 | 0 |
| CHB | chr16 | NPIP | 18753599 | 0 |
| CHB | chr16 | NPIP | 18803599 | 0 |
| CHB | chr16 | NPIP | 18853599 | 0 |
| CHB | chr16 | NPIP | 18903599 | 0 |
| CHB | chr16 | NPIP | 18953599 | 0 |
| CHB | chr16 | NPIP | 19003599 | 0 |
| CHB | chr16 | NPIP | 19053599 | 0 |
| CHB | chr16 | NPIP | 19103599 | 0 |
| CHB | chr16 | NPIP | 19153599 | 0 |
| CHB | chr16 | NPIP | 19203599 | 0 |
| CHB | chr16 | NPIP | 19253599 | 0 |

3\_Introgression\_data

|     |       |      |          |    |
|-----|-------|------|----------|----|
| CHB | chr16 | NPIP | 19303599 | 0  |
| CHB | chr16 | NPIP | 19353599 | 0  |
| CHB | chr16 | NPIP | 19403599 | 0  |
| CHB | chr16 | NPIP | 19453599 | 0  |
| CHB | chr16 | NPIP | 19503599 | 0  |
| CHB | chr16 | NPIP | 19553599 | 0  |
| CHB | chr16 | NPIP | 19603599 | 0  |
| CHB | chr16 | NPIP | 19653599 | 0  |
| CHB | chr16 | NPIP | 19703599 | 0  |
| CHB | chr16 | NPIP | 19753599 | 0  |
| CHB | chr16 | NPIP | 19803599 | 0  |
| CHB | chr16 | NPIP | 19853599 | 0  |
| CHB | chr16 | NPIP | 19903599 | 0  |
| CHB | chr16 | NPIP | 19953599 | 0  |
| CHB | chr16 | NPIP | 20003599 | 0  |
| CHB | chr16 | NPIP | 20053599 | 0  |
| CHB | chr16 | NPIP | 20103599 | 0  |
| CHB | chr16 | NPIP | 20153599 | 0  |
| CHB | chr16 | NPIP | 20203599 | 0  |
| CHB | chr16 | NPIP | 20253599 | 0  |
| CHB | chr16 | NPIP | 20303599 | 0  |
| CHB | chr16 | NPIP | 20353599 | 0  |
| CHB | chr16 | NPIP | 20403599 | 0  |
| CHB | chr16 | NPIP | 20453599 | 0  |
| CHB | chr16 | NPIP | 20503599 | 0  |
| CHB | chr16 | NPIP | 20553599 | 0  |
| CHB | chr16 | NPIP | 20603599 | 0  |
| CHB | chr16 | NPIP | 20653599 | 0  |
| CHB | chr16 | NPIP | 20703599 | 0  |
| CHB | chr16 | NPIP | 20753599 | 0  |
| CHB | chr16 | NPIP | 20803599 | 0  |
| CHB | chr16 | NPIP | 20853599 | 0  |
| CHB | chr16 | NPIP | 20903599 | 0  |
| CHB | chr16 | NPIP | 20953599 | 0  |
| CHB | chr16 | NPIP | 21003599 | 0  |
| CHB | chr16 | NPIP | 21053599 | 0  |
| CHB | chr16 | NPIP | 21103599 | 0  |
| CHB | chr16 | NPIP | 21153599 | 0  |
| CHB | chr16 | NPIP | 21203599 | 0  |
| CHB | chr16 | NPIP | 21253599 | 25 |
| CHB | chr16 | NPIP | 21303599 | 48 |
| CHB | chr16 | NPIP | 21353599 | 34 |
| CHB | chr16 | NPIP | 21403599 | 11 |
| CHB | chr16 | NPIP | 21453599 | 0  |
| CHB | chr16 | NPIP | 21503599 | 38 |
| CHB | chr16 | NPIP | 21553599 | 56 |
| CHB | chr16 | NPIP | 21603599 | 76 |
| CHB | chr16 | NPIP | 21653599 | 77 |
| CHB | chr16 | NPIP | 21703599 | 27 |

## 3\_Introgression\_data

|     |       |      |          |   |
|-----|-------|------|----------|---|
| CHB | chr16 | NPIP | 21753599 | 8 |
| CHB | chr16 | NPIP | 21803599 | 0 |
| CHB | chr16 | NPIP | 21853599 | 0 |
| CHB | chr16 | NPIP | 21903599 | 0 |
| CHB | chr16 | NPIP | 21953599 | 0 |
| CHB | chr16 | NPIP | 22003599 | 0 |
| CHB | chr16 | NPIP | 22053599 | 0 |
| CHB | chr16 | NPIP | 22103599 | 0 |
| CHB | chr16 | NPIP | 22153599 | 0 |
| CHB | chr16 | NPIP | 22203599 | 0 |
| CHB | chr16 | NPIP | 22253599 | 0 |
| CHB | chr16 | NPIP | 22303599 | 0 |
| CHB | chr16 | NPIP | 22353599 | 0 |
| CHB | chr16 | NPIP | 22403599 | 0 |
| CHB | chr16 | NPIP | 22453599 | 0 |
| CHB | chr16 | NPIP | 22503599 | 0 |
| CHB | chr16 | NPIP | 22553599 | 0 |
| CHB | chr16 | NPIP | 22603599 | 0 |
| CHB | chr16 | NPIP | 22653599 | 0 |
| CHB | chr16 | NPIP | 22703599 | 0 |
| CHB | chr16 | NPIP | 22753599 | 0 |
| CHB | chr16 | NPIP | 22803599 | 0 |
| CHB | chr16 | NPIP | 22853599 | 0 |
| CHB | chr16 | NPIP | 22903599 | 0 |
| CHB | chr16 | NPIP | 22953599 | 0 |
| CHB | chr16 | NPIP | 23003599 | 0 |
| CHB | chr16 | NPIP | 23053599 | 0 |
| CHB | chr16 | NPIP | 23103599 | 0 |
| CHB | chr16 | NPIP | 23153599 | 0 |
| CHB | chr16 | NPIP | 23203599 | 0 |
| CHB | chr16 | NPIP | 23253599 | 0 |
| CHB | chr16 | NPIP | 23303599 | 0 |
| CHB | chr16 | NPIP | 23353599 | 0 |
| CHB | chr16 | NPIP | 23403599 | 0 |
| CHB | chr16 | NPIP | 23453599 | 0 |
| CHB | chr16 | NPIP | 23503599 | 0 |
| CHB | chr16 | NPIP | 23553599 | 0 |
| CHB | chr16 | NPIP | 23603599 | 0 |
| CHB | chr16 | NPIP | 23653599 | 0 |
| CHB | chr16 | NPIP | 23703599 | 0 |
| CHB | chr16 | NPIP | 23753599 | 0 |
| CHB | chr16 | NPIP | 23803599 | 0 |
| CHB | chr16 | NPIP | 23853599 | 0 |
| CHB | chr16 | NPIP | 23903599 | 0 |
| CHB | chr16 | NPIP | 23953599 | 0 |
| CHB | chr16 | NPIP | 24003599 | 0 |
| CHB | chr16 | NPIP | 24053599 | 0 |
| CHB | chr16 | NPIP | 24103599 | 0 |
| CHB | chr16 | NPIP | 24153599 | 0 |



### 3\_Introgression\_data

|     |       |      |          |    |
|-----|-------|------|----------|----|
| CHB | chr16 | NPIP | 24203599 | 0  |
| CHB | chr16 | NPIP | 24253599 | 0  |
| CHB | chr16 | NPIP | 24303599 | 0  |
| CHB | chr16 | NPIP | 24353599 | 0  |
| CHB | chr16 | NPIP | 24403599 | 0  |
| CHB | chr16 | NPIP | 24453599 | 0  |
| CHB | chr16 | NPIP | 24503599 | 0  |
| CHB | chr16 | NPIP | 24553599 | 0  |
| CHB | chr16 | NPIP | 24603599 | 0  |
| CHB | chr16 | NPIP | 24653599 | 0  |
| CHB | chr16 | NPIP | 24703599 | 0  |
| CHB | chr16 | NPIP | 24753599 | 0  |
| CHB | chr16 | NPIP | 24803599 | 0  |
| CHB | chr16 | NPIP | 24853599 | 0  |
| CHB | chr16 | NPIP | 24903599 | 0  |
| CHB | chr16 | NPIP | 24953599 | 0  |
| CHB | chr16 | NPIP | 25003599 | 0  |
| CHB | chr16 | NPIP | 25053599 | 0  |
| CHB | chr16 | NPIP | 25103599 | 0  |
| CHB | chr16 | NPIP | 25153599 | 0  |
| CHB | chr16 | NPIP | 25203599 | 0  |
| CHB | chr16 | NPIP | 25253599 | 0  |
| CHB | chr16 | NPIP | 25303599 | 0  |
| CHB | chr16 | NPIP | 25353599 | 0  |
| CHB | chr16 | NPIP | 25403599 | 0  |
| CHB | chr16 | NPIP | 25453599 | 0  |
| CHB | chr16 | NPIP | 25503599 | 0  |
| CHB | chr16 | NPIP | 25553599 | 0  |
| CHB | chr16 | NPIP | 25603599 | 0  |
| CHB | chr16 | NPIP | 25653599 | 0  |
| CHB | chr16 | NPIP | 25703599 | 0  |
| CHB | chr16 | NPIP | 25753599 | 0  |
| CHB | chr16 | NPIP | 25803599 | 0  |
| CHB | chr16 | NPIP | 25853599 | 0  |
| CHB | chr16 | NPIP | 25903599 | 7  |
| CHB | chr16 | NPIP | 25953599 | 38 |
| CHB | chr16 | NPIP | 26003599 | 31 |
| CHB | chr16 | NPIP | 26053599 | 0  |
| CHB | chr16 | NPIP | 26103599 | 0  |
| CHB | chr16 | NPIP | 26153599 | 0  |
| CHB | chr16 | NPIP | 26203599 | 0  |
| CHB | chr16 | NPIP | 26253599 | 0  |
| CHB | chr16 | NPIP | 26303599 | 0  |
| CHB | chr16 | NPIP | 26353599 | 0  |
| CHB | chr16 | NPIP | 26403599 | 0  |
| CHB | chr16 | NPIP | 26453599 | 0  |
| CHB | chr16 | NPIP | 26503599 | 0  |
| CHB | chr16 | NPIP | 26553599 | 0  |
| CHB | chr16 | NPIP | 26603599 | 0  |

## 3\_Introgression\_data

|     |       |      |          |   |
|-----|-------|------|----------|---|
| CHB | chr16 | NPIP | 26653599 | 0 |
| CHB | chr16 | NPIP | 26703599 | 0 |
| CHB | chr16 | NPIP | 26753599 | 0 |
| CHB | chr16 | NPIP | 26803599 | 0 |
| CHB | chr16 | NPIP | 26853599 | 0 |
| CHB | chr16 | NPIP | 26903599 | 0 |
| CHB | chr16 | NPIP | 26953599 | 0 |
| CHB | chr16 | NPIP | 27003599 | 0 |
| CHB | chr16 | NPIP | 27053599 | 0 |
| CHB | chr16 | NPIP | 27103599 | 0 |
| CHB | chr16 | NPIP | 27153599 | 0 |
| CHB | chr16 | NPIP | 27203599 | 0 |
| CHB | chr16 | NPIP | 27253599 | 0 |
| CHB | chr16 | NPIP | 27303599 | 0 |
| CHB | chr16 | NPIP | 27353599 | 0 |
| CHB | chr16 | NPIP | 27403599 | 0 |
| CHB | chr16 | NPIP | 27453599 | 0 |
| CHB | chr16 | NPIP | 23392517 | 0 |
| CHB | chr16 | NPIP | 23442517 | 0 |
| CHB | chr16 | NPIP | 23492517 | 0 |
| CHB | chr16 | NPIP | 23542517 | 0 |
| CHB | chr16 | NPIP | 23592517 | 0 |
| CHB | chr16 | NPIP | 23642517 | 0 |
| CHB | chr16 | NPIP | 23692517 | 0 |
| CHB | chr16 | NPIP | 23742517 | 0 |
| CHB | chr16 | NPIP | 23792517 | 0 |
| CHB | chr16 | NPIP | 23842517 | 0 |
| CHB | chr16 | NPIP | 23892517 | 0 |
| CHB | chr16 | NPIP | 23942517 | 0 |
| CHB | chr16 | NPIP | 23992517 | 0 |
| CHB | chr16 | NPIP | 24042517 | 0 |
| CHB | chr16 | NPIP | 24092517 | 0 |
| CHB | chr16 | NPIP | 24142517 | 0 |
| CHB | chr16 | NPIP | 24192517 | 0 |
| CHB | chr16 | NPIP | 24242517 | 0 |
| CHB | chr16 | NPIP | 24292517 | 0 |
| CHB | chr16 | NPIP | 24342517 | 0 |
| CHB | chr16 | NPIP | 24392517 | 0 |
| CHB | chr16 | NPIP | 24442517 | 0 |
| CHB | chr16 | NPIP | 24492517 | 0 |
| CHB | chr16 | NPIP | 24542517 | 0 |
| CHB | chr16 | NPIP | 24592517 | 0 |
| CHB | chr16 | NPIP | 24642517 | 0 |
| CHB | chr16 | NPIP | 24692517 | 0 |
| CHB | chr16 | NPIP | 24742517 | 0 |
| CHB | chr16 | NPIP | 24792517 | 0 |
| CHB | chr16 | NPIP | 24842517 | 0 |
| CHB | chr16 | NPIP | 24892517 | 0 |
| CHB | chr16 | NPIP | 24942517 | 0 |

3\_Introgression\_data

|     |       |      |          |    |
|-----|-------|------|----------|----|
| CHB | chr16 | NPIP | 24992517 | 0  |
| CHB | chr16 | NPIP | 25042517 | 0  |
| CHB | chr16 | NPIP | 25092517 | 0  |
| CHB | chr16 | NPIP | 25142517 | 0  |
| CHB | chr16 | NPIP | 25192517 | 0  |
| CHB | chr16 | NPIP | 25242517 | 0  |
| CHB | chr16 | NPIP | 25292517 | 0  |
| CHB | chr16 | NPIP | 25342517 | 0  |
| CHB | chr16 | NPIP | 25392517 | 0  |
| CHB | chr16 | NPIP | 25442517 | 0  |
| CHB | chr16 | NPIP | 25492517 | 0  |
| CHB | chr16 | NPIP | 25542517 | 0  |
| CHB | chr16 | NPIP | 25592517 | 0  |
| CHB | chr16 | NPIP | 25642517 | 0  |
| CHB | chr16 | NPIP | 25692517 | 0  |
| CHB | chr16 | NPIP | 25742517 | 0  |
| CHB | chr16 | NPIP | 25792517 | 0  |
| CHB | chr16 | NPIP | 25842517 | 0  |
| CHB | chr16 | NPIP | 25892517 | 5  |
| CHB | chr16 | NPIP | 25942517 | 38 |
| CHB | chr16 | NPIP | 25992517 | 33 |
| CHB | chr16 | NPIP | 26042517 | 0  |
| CHB | chr16 | NPIP | 26092517 | 0  |
| CHB | chr16 | NPIP | 26142517 | 0  |
| CHB | chr16 | NPIP | 26192517 | 0  |
| CHB | chr16 | NPIP | 26242517 | 0  |
| CHB | chr16 | NPIP | 26292517 | 0  |
| CHB | chr16 | NPIP | 26342517 | 0  |
| CHB | chr16 | NPIP | 26392517 | 0  |
| CHB | chr16 | NPIP | 26442517 | 0  |
| CHB | chr16 | NPIP | 26492517 | 0  |
| CHB | chr16 | NPIP | 26542517 | 0  |
| CHB | chr16 | NPIP | 26592517 | 0  |
| CHB | chr16 | NPIP | 26642517 | 0  |
| CHB | chr16 | NPIP | 26692517 | 0  |
| CHB | chr16 | NPIP | 26742517 | 0  |
| CHB | chr16 | NPIP | 26792517 | 0  |
| CHB | chr16 | NPIP | 26842517 | 0  |
| CHB | chr16 | NPIP | 26892517 | 0  |
| CHB | chr16 | NPIP | 26942517 | 0  |
| CHB | chr16 | NPIP | 26992517 | 0  |
| CHB | chr16 | NPIP | 27042517 | 0  |
| CHB | chr16 | NPIP | 27092517 | 0  |
| CHB | chr16 | NPIP | 27142517 | 0  |
| CHB | chr16 | NPIP | 27192517 | 0  |
| CHB | chr16 | NPIP | 27242517 | 0  |
| CHB | chr16 | NPIP | 27292517 | 0  |
| CHB | chr16 | NPIP | 27342517 | 0  |
| CHB | chr16 | NPIP | 27392517 | 0  |

## 3\_Introgression\_data

|     |       |      |          |   |
|-----|-------|------|----------|---|
| CHB | chr16 | NPIP | 27442517 | 0 |
| CHB | chr16 | NPIP | 27492517 | 0 |
| CHB | chr16 | NPIP | 27542517 | 0 |
| CHB | chr16 | NPIP | 27592517 | 0 |
| CHB | chr16 | NPIP | 27642517 | 0 |
| CHB | chr16 | NPIP | 27692517 | 0 |
| CHB | chr16 | NPIP | 27742517 | 0 |
| CHB | chr16 | NPIP | 27792517 | 0 |
| CHB | chr16 | NPIP | 27842517 | 0 |
| CHB | chr16 | NPIP | 27892517 | 0 |
| CHB | chr16 | NPIP | 27942517 | 0 |
| CHB | chr16 | NPIP | 27992517 | 0 |
| CHB | chr16 | NPIP | 28042517 | 0 |
| CHB | chr16 | NPIP | 28092517 | 0 |
| CHB | chr16 | NPIP | 28142517 | 0 |
| CHB | chr16 | NPIP | 28192517 | 0 |
| CHB | chr16 | NPIP | 28242517 | 0 |
| CHB | chr16 | NPIP | 28292517 | 0 |
| CHB | chr16 | NPIP | 28342517 | 0 |
| CHB | chr16 | NPIP | 28392517 | 0 |
| CHB | chr16 | NPIP | 28442517 | 0 |
| CHB | chr16 | NPIP | 28492517 | 0 |
| CHB | chr16 | NPIP | 28542517 | 0 |
| CHB | chr16 | NPIP | 28592517 | 0 |
| CHB | chr16 | NPIP | 28642517 | 0 |
| CHB | chr16 | NPIP | 28692517 | 0 |
| CHB | chr16 | NPIP | 28742517 | 0 |
| CHB | chr16 | NPIP | 28792517 | 0 |
| CHB | chr16 | NPIP | 28842517 | 0 |
| CHB | chr16 | NPIP | 28892517 | 0 |
| CHB | chr16 | NPIP | 28942517 | 0 |
| CHB | chr16 | NPIP | 28992517 | 0 |
| CHB | chr16 | NPIP | 29042517 | 0 |
| CHB | chr16 | NPIP | 29092517 | 0 |
| CHB | chr16 | NPIP | 29142517 | 0 |
| CHB | chr16 | NPIP | 29192517 | 0 |
| CHB | chr16 | NPIP | 29242517 | 0 |
| CHB | chr16 | NPIP | 29292517 | 0 |
| CHB | chr16 | NPIP | 29342517 | 0 |
| CHB | chr16 | NPIP | 29392517 | 0 |
| CHB | chr16 | NPIP | 29442517 | 0 |
| CHB | chr16 | NPIP | 29492517 | 0 |
| CHB | chr16 | NPIP | 29542517 | 0 |
| CHB | chr16 | NPIP | 29592517 | 0 |
| CHB | chr16 | NPIP | 29642517 | 0 |
| CHB | chr16 | NPIP | 29692517 | 0 |
| CHB | chr16 | NPIP | 29742517 | 0 |
| CHB | chr16 | NPIP | 29792517 | 0 |
| CHB | chr16 | NPIP | 29842517 | 0 |

## 3\_Introgression\_data

|     |       |      |          |   |
|-----|-------|------|----------|---|
| CHB | chr16 | NPIP | 29892517 | 0 |
| CHB | chr16 | NPIP | 29942517 | 0 |
| CHB | chr16 | NPIP | 29992517 | 0 |
| CHB | chr16 | NPIP | 30042517 | 0 |
| CHB | chr16 | NPIP | 30092517 | 0 |
| CHB | chr16 | NPIP | 30142517 | 0 |
| CHB | chr16 | NPIP | 30192517 | 0 |
| CHB | chr16 | NPIP | 30242517 | 0 |
| CHB | chr16 | NPIP | 30292517 | 0 |
| CHB | chr16 | NPIP | 30342517 | 0 |
| CHB | chr16 | NPIP | 30392517 | 0 |
| CHB | chr16 | NPIP | 30442517 | 0 |
| CHB | chr16 | NPIP | 30492517 | 0 |
| CHB | chr16 | NPIP | 30542517 | 0 |
| CHB | chr16 | NPIP | 30592517 | 0 |
| CHB | chr16 | NPIP | 30642517 | 0 |
| CHB | chr16 | NPIP | 30692517 | 0 |
| CHB | chr16 | NPIP | 30742517 | 0 |
| CHB | chr16 | NPIP | 30792517 | 0 |
| CHB | chr16 | NPIP | 30842517 | 0 |
| CHB | chr16 | NPIP | 30892517 | 0 |
| CHB | chr16 | NPIP | 30942517 | 0 |
| CHB | chr16 | NPIP | 30992517 | 0 |
| CHB | chr16 | NPIP | 31042517 | 0 |
| CHB | chr16 | NPIP | 31092517 | 0 |
| CHB | chr16 | NPIP | 31142517 | 0 |
| CHB | chr16 | NPIP | 31192517 | 0 |
| CHB | chr16 | NPIP | 31242517 | 0 |
| CHB | chr16 | NPIP | 31292517 | 0 |
| CHB | chr16 | NPIP | 31342517 | 0 |
| CHB | chr16 | NPIP | 31392517 | 0 |
| CHB | chr16 | NPIP | 31442517 | 0 |
| CHB | chr16 | NPIP | 31492517 | 0 |
| CHB | chr16 | NPIP | 31542517 | 0 |
| CHB | chr16 | NPIP | 31592517 | 0 |
| CHB | chr16 | NPIP | 31642517 | 0 |
| CHB | chr16 | NPIP | 31692517 | 0 |
| CHB | chr16 | NPIP | 31742517 | 0 |
| CHB | chr16 | NPIP | 31792517 | 0 |
| CHB | chr16 | NPIP | 31842517 | 0 |
| CHB | chr16 | NPIP | 31892517 | 0 |
| CHB | chr16 | NPIP | 31942517 | 0 |
| CHB | chr16 | NPIP | 31992517 | 0 |
| CHB | chr16 | NPIP | 32042517 | 0 |
| CHB | chr16 | NPIP | 32092517 | 0 |
| CHB | chr16 | NPIP | 32142517 | 0 |
| CHB | chr16 | NPIP | 32192517 | 0 |
| CHB | chr16 | NPIP | 32242517 | 0 |
| CHB | chr16 | NPIP | 32292517 | 0 |

## 3\_Introgression\_data

|     |       |      |          |   |
|-----|-------|------|----------|---|
| CHB | chr16 | NPIP | 32342517 | 0 |
| CHB | chr16 | NPIP | 32392517 | 0 |
| CHB | chr16 | NPIP | 32442517 | 0 |
| CHB | chr16 | NPIP | 32492517 | 0 |
| CHB | chr16 | NPIP | 32542517 | 0 |
| CHB | chr16 | NPIP | 32592517 | 0 |
| CHB | chr16 | NPIP | 32642517 | 0 |
| CHB | chr16 | NPIP | 32692517 | 0 |
| CHB | chr16 | NPIP | 32742517 | 0 |
| CHB | chr16 | NPIP | 32792517 | 0 |
| CHB | chr16 | NPIP | 32842517 | 0 |
| CHB | chr16 | NPIP | 32892517 | 0 |
| CHB | chr16 | NPIP | 32942517 | 0 |
| CHB | chr16 | NPIP | 32992517 | 0 |
| CHB | chr16 | NPIP | 33042517 | 0 |
| CHB | chr16 | NPIP | 33092517 | 0 |
| CHB | chr16 | NPIP | 33142517 | 0 |
| CHB | chr16 | NPIP | 33192517 | 0 |
| CHB | chr16 | NPIP | 33242517 | 0 |
| CHB | chr16 | NPIP | 33292517 | 0 |
| CHB | chr16 | NPIP | 69424986 | 0 |
| CHB | chr16 | NPIP | 69474986 | 0 |
| CHB | chr16 | NPIP | 69524986 | 0 |
| CHB | chr16 | NPIP | 69574986 | 0 |
| CHB | chr16 | NPIP | 69624986 | 0 |
| CHB | chr16 | NPIP | 69674986 | 0 |
| CHB | chr16 | NPIP | 69724986 | 0 |
| CHB | chr16 | NPIP | 69774986 | 0 |
| CHB | chr16 | NPIP | 69824986 | 0 |
| CHB | chr16 | NPIP | 69874986 | 0 |
| CHB | chr16 | NPIP | 69924986 | 0 |
| CHB | chr16 | NPIP | 69974986 | 0 |
| CHB | chr16 | NPIP | 70024986 | 0 |
| CHB | chr16 | NPIP | 70074986 | 0 |
| CHB | chr16 | NPIP | 70124986 | 0 |
| CHB | chr16 | NPIP | 70174986 | 0 |
| CHB | chr16 | NPIP | 70224986 | 0 |
| CHB | chr16 | NPIP | 70274986 | 0 |
| CHB | chr16 | NPIP | 70324986 | 0 |
| CHB | chr16 | NPIP | 70374986 | 0 |
| CHB | chr16 | NPIP | 70424986 | 0 |
| CHB | chr16 | NPIP | 70474986 | 0 |
| CHB | chr16 | NPIP | 70524986 | 0 |
| CHB | chr16 | NPIP | 70574986 | 0 |
| CHB | chr16 | NPIP | 70624986 | 0 |
| CHB | chr16 | NPIP | 70674986 | 0 |
| CHB | chr16 | NPIP | 70724986 | 0 |
| CHB | chr16 | NPIP | 70774986 | 0 |
| CHB | chr16 | NPIP | 70824986 | 0 |

### 3\_Introgression\_data

|     |       |      |          |    |
|-----|-------|------|----------|----|
| CHB | chr16 | NPIP | 70874986 | 0  |
| CHB | chr16 | NPIP | 70924986 | 0  |
| CHB | chr16 | NPIP | 70974986 | 0  |
| CHB | chr16 | NPIP | 71024986 | 0  |
| CHB | chr16 | NPIP | 71074986 | 0  |
| CHB | chr16 | NPIP | 71124986 | 0  |
| CHB | chr16 | NPIP | 71174986 | 0  |
| CHB | chr16 | NPIP | 71224986 | 0  |
| CHB | chr16 | NPIP | 71274986 | 0  |
| CHB | chr16 | NPIP | 71324986 | 0  |
| CHB | chr16 | NPIP | 71374986 | 0  |
| CHB | chr16 | NPIP | 71424986 | 0  |
| CHB | chr16 | NPIP | 71474986 | 0  |
| CHB | chr16 | NPIP | 71524986 | 0  |
| CHB | chr16 | NPIP | 71574986 | 0  |
| CHB | chr16 | NPIP | 71624986 | 0  |
| CHB | chr16 | NPIP | 71674986 | 0  |
| CHB | chr16 | NPIP | 71724986 | 0  |
| CHB | chr16 | NPIP | 71774986 | 0  |
| CHB | chr16 | NPIP | 71824986 | 0  |
| CHB | chr16 | NPIP | 71874986 | 0  |
| CHB | chr16 | NPIP | 71924986 | 0  |
| CHB | chr16 | NPIP | 71974986 | 0  |
| CHB | chr16 | NPIP | 72024986 | 0  |
| CHB | chr16 | NPIP | 72074986 | 0  |
| CHB | chr16 | NPIP | 72124986 | 0  |
| CHB | chr16 | NPIP | 72174986 | 0  |
| CHB | chr16 | NPIP | 72224986 | 0  |
| CHB | chr16 | NPIP | 72274986 | 0  |
| CHB | chr16 | NPIP | 72324986 | 0  |
| CHB | chr16 | NPIP | 72374986 | 0  |
| CHB | chr16 | NPIP | 72424986 | 0  |
| CHB | chr16 | NPIP | 72474986 | 0  |
| CHB | chr16 | NPIP | 72524986 | 0  |
| CHB | chr16 | NPIP | 72574986 | 0  |
| CHB | chr16 | NPIP | 72624986 | 0  |
| CHB | chr16 | NPIP | 72674986 | 0  |
| CHB | chr16 | NPIP | 72724986 | 0  |
| CHB | chr16 | NPIP | 72774986 | 0  |
| CHB | chr16 | NPIP | 72824986 | 0  |
| CHB | chr16 | NPIP | 72874986 | 6  |
| CHB | chr16 | NPIP | 72924986 | 30 |
| CHB | chr16 | NPIP | 72974986 | 48 |
| CHB | chr16 | NPIP | 73024986 | 39 |
| CHB | chr16 | NPIP | 73074986 | 35 |
| CHB | chr16 | NPIP | 73124986 | 20 |
| CHB | chr16 | NPIP | 73174986 | 0  |
| CHB | chr16 | NPIP | 73224986 | 0  |
| CHB | chr16 | NPIP | 73274986 | 0  |

### 3\_Introgression\_data

|     |       |      |          |    |
|-----|-------|------|----------|----|
| CHB | chr16 | NPIP | 73324986 | 0  |
| CHB | chr16 | NPIP | 73374986 | 0  |
| CHB | chr16 | NPIP | 73424986 | 0  |
| CHB | chr16 | NPIP | 73474986 | 0  |
| CHB | chr16 | NPIP | 73524986 | 0  |
| CHB | chr16 | NPIP | 73574986 | 0  |
| CHB | chr16 | NPIP | 73624986 | 0  |
| CHB | chr16 | NPIP | 73674986 | 0  |
| CHB | chr16 | NPIP | 73724986 | 0  |
| CHB | chr16 | NPIP | 73774986 | 0  |
| CHB | chr16 | NPIP | 73824986 | 0  |
| CHB | chr16 | NPIP | 73874986 | 0  |
| CHB | chr16 | NPIP | 73924986 | 0  |
| CHB | chr16 | NPIP | 73974986 | 0  |
| CHB | chr16 | NPIP | 74024986 | 0  |
| CHB | chr16 | NPIP | 74074986 | 0  |
| CHB | chr16 | NPIP | 74124986 | 0  |
| CHB | chr16 | NPIP | 74174986 | 0  |
| CHB | chr16 | NPIP | 74224986 | 0  |
| CHB | chr16 | NPIP | 74274986 | 0  |
| CHB | chr16 | NPIP | 74324986 | 0  |
| CHB | chr16 | NPIP | 74374986 | 0  |
| CHB | chr16 | NPIP | 74424986 | 31 |
| CHB | chr16 | NPIP | 74474986 | 62 |
| CHB | chr16 | NPIP | 74524986 | 44 |
| CHB | chr16 | NPIP | 74574986 | 35 |
| CHB | chr16 | NPIP | 74624986 | 46 |
| CHB | chr16 | NPIP | 74674986 | 53 |
| CHB | chr16 | NPIP | 74724986 | 35 |
| CHB | chr16 | NPIP | 74774986 | 6  |
| CHB | chr16 | NPIP | 74824986 | 0  |
| CHB | chr16 | NPIP | 74874986 | 0  |
| CHB | chr16 | NPIP | 74924986 | 0  |
| CHB | chr16 | NPIP | 74974986 | 0  |
| CHB | chr16 | NPIP | 75024986 | 0  |
| CHB | chr16 | NPIP | 75074986 | 0  |
| CHB | chr16 | NPIP | 75124986 | 0  |
| CHB | chr16 | NPIP | 75174986 | 0  |
| CHB | chr16 | NPIP | 75224986 | 0  |
| CHB | chr16 | NPIP | 75274986 | 0  |
| CHB | chr16 | NPIP | 75324986 | 0  |
| CHB | chr16 | NPIP | 75374986 | 0  |
| CHB | chr16 | NPIP | 75424986 | 0  |
| CHB | chr16 | NPIP | 75474986 | 0  |
| CHB | chr16 | NPIP | 75524986 | 0  |
| CHB | chr16 | NPIP | 75574986 | 0  |
| CHB | chr16 | NPIP | 75624986 | 0  |
| CHB | chr16 | NPIP | 75674986 | 0  |
| CHB | chr16 | NPIP | 75724986 | 0  |



### 3\_Introgression\_data

|     |       |      |          |     |
|-----|-------|------|----------|-----|
| CHB | chr16 | NPIP | 75774986 | 0   |
| CHB | chr16 | NPIP | 75824986 | 0   |
| CHB | chr16 | NPIP | 75874986 | 0   |
| CHB | chr16 | NPIP | 75924986 | 0   |
| CHB | chr16 | NPIP | 75974986 | 0   |
| CHB | chr16 | NPIP | 76024986 | 0   |
| CHB | chr16 | NPIP | 76074986 | 0   |
| CHB | chr16 | NPIP | 76124986 | 0   |
| CHB | chr16 | NPIP | 76174986 | 0   |
| CHB | chr16 | NPIP | 76224986 | 0   |
| CHB | chr16 | NPIP | 76274986 | 0   |
| CHB | chr16 | NPIP | 76324986 | 0   |
| CHB | chr16 | NPIP | 76374986 | 0   |
| CHB | chr16 | NPIP | 76424986 | 0   |
| CHB | chr16 | NPIP | 76474986 | 0   |
| CHB | chr16 | NPIP | 76524986 | 0   |
| CHB | chr16 | NPIP | 76574986 | 0   |
| CHB | chr16 | NPIP | 76624986 | 0   |
| CHB | chr16 | NPIP | 76674986 | 0   |
| CHB | chr16 | NPIP | 76724986 | 7   |
| CHB | chr16 | NPIP | 76774986 | 20  |
| CHB | chr16 | NPIP | 76824986 | 44  |
| CHB | chr16 | NPIP | 76874986 | 39  |
| CHB | chr16 | NPIP | 76924986 | 22  |
| CHB | chr16 | NPIP | 76974986 | 33  |
| CHB | chr16 | NPIP | 77024986 | 33  |
| CHB | chr16 | NPIP | 77074986 | 24  |
| CHB | chr16 | NPIP | 77124986 | 44  |
| CHB | chr16 | NPIP | 77174986 | 49  |
| CHB | chr16 | NPIP | 77224986 | 25  |
| CHB | chr16 | NPIP | 77274986 | 38  |
| CHB | chr16 | NPIP | 77324986 | 89  |
| CHB | chr16 | NPIP | 77374986 | 94  |
| CHB | chr16 | NPIP | 77424986 | 55  |
| CHB | chr16 | NPIP | 77474986 | 32  |
| CHB | chr16 | NPIP | 77524986 | 39  |
| CHB | chr16 | NPIP | 77574986 | 54  |
| CHB | chr16 | NPIP | 77624986 | 46  |
| CHB | chr16 | NPIP | 77674986 | 37  |
| CHB | chr16 | NPIP | 77724986 | 26  |
| CHB | chr16 | NPIP | 77774986 | 22  |
| CHB | chr16 | NPIP | 77824986 | 30  |
| CHB | chr16 | NPIP | 77874986 | 31  |
| CHB | chr16 | NPIP | 77924986 | 33  |
| CHB | chr16 | NPIP | 77974986 | 36  |
| CHB | chr16 | NPIP | 78024986 | 37  |
| CHB | chr16 | NPIP | 78074986 | 103 |
| CHB | chr16 | NPIP | 78124986 | 110 |
| CHB | chr16 | NPIP | 78174986 | 67  |

### 3\_Introgression\_data

|     |       |      |          |     |
|-----|-------|------|----------|-----|
| CHB | chr16 | NPIP | 78224986 | 66  |
| CHB | chr16 | NPIP | 78274986 | 40  |
| CHB | chr16 | NPIP | 78324986 | 37  |
| CHB | chr16 | NPIP | 78374986 | 96  |
| CHB | chr16 | NPIP | 78424986 | 90  |
| CHB | chr16 | NPIP | 78474986 | 24  |
| CHB | chr16 | NPIP | 78524986 | 18  |
| CHB | chr16 | NPIP | 78574986 | 21  |
| CHB | chr16 | NPIP | 78624986 | 21  |
| CHB | chr16 | NPIP | 78674986 | 71  |
| CHB | chr16 | NPIP | 78724986 | 124 |
| CHB | chr16 | NPIP | 78774986 | 67  |
| CHB | chr16 | NPIP | 78824986 | 2   |
| CHB | chr16 | NPIP | 78874986 | 0   |
| CHB | chr16 | NPIP | 78924986 | 0   |
| CHB | chr16 | NPIP | 78974986 | 0   |
| CHB | chr16 | NPIP | 79024986 | 0   |
| CHB | chr16 | NPIP | 79074986 | 0   |
| CHB | chr16 | NPIP | 79124986 | 0   |
| CHB | chr16 | NPIP | 79174986 | 2   |
| CHB | chr16 | NPIP | 79224986 | 73  |
| CHB | chr16 | NPIP | 79274986 | 100 |
| CHB | chr16 | NPIP | 79324986 | 29  |
| CHB | chr11 | PGA3 | 56253515 | 0   |
| CHB | chr11 | PGA3 | 56303515 | 0   |
| CHB | chr11 | PGA3 | 56353515 | 0   |
| CHB | chr11 | PGA3 | 56403515 | 0   |
| CHB | chr11 | PGA3 | 56453515 | 0   |
| CHB | chr11 | PGA3 | 56503515 | 0   |
| CHB | chr11 | PGA3 | 56553515 | 0   |
| CHB | chr11 | PGA3 | 56603515 | 0   |
| CHB | chr11 | PGA3 | 56653515 | 0   |
| CHB | chr11 | PGA3 | 56703515 | 0   |
| CHB | chr11 | PGA3 | 56753515 | 0   |
| CHB | chr11 | PGA3 | 56803515 | 0   |
| CHB | chr11 | PGA3 | 56853515 | 0   |
| CHB | chr11 | PGA3 | 56903515 | 0   |
| CHB | chr11 | PGA3 | 56953515 | 0   |
| CHB | chr11 | PGA3 | 57003515 | 0   |
| CHB | chr11 | PGA3 | 57053515 | 0   |
| CHB | chr11 | PGA3 | 57103515 | 0   |
| CHB | chr11 | PGA3 | 57153515 | 0   |
| CHB | chr11 | PGA3 | 57203515 | 0   |
| CHB | chr11 | PGA3 | 57253515 | 0   |
| CHB | chr11 | PGA3 | 57303515 | 0   |
| CHB | chr11 | PGA3 | 57353515 | 0   |
| CHB | chr11 | PGA3 | 57403515 | 0   |
| CHB | chr11 | PGA3 | 57453515 | 0   |
| CHB | chr11 | PGA3 | 57503515 | 0   |

## 3\_Introgression\_data

|     |       |      |          |   |
|-----|-------|------|----------|---|
| CHB | chr11 | PGA3 | 57553515 | 0 |
| CHB | chr11 | PGA3 | 57603515 | 0 |
| CHB | chr11 | PGA3 | 57653515 | 0 |
| CHB | chr11 | PGA3 | 57703515 | 0 |
| CHB | chr11 | PGA3 | 57753515 | 0 |
| CHB | chr11 | PGA3 | 57803515 | 0 |
| CHB | chr11 | PGA3 | 57853515 | 0 |
| CHB | chr11 | PGA3 | 57903515 | 0 |
| CHB | chr11 | PGA3 | 57953515 | 0 |
| CHB | chr11 | PGA3 | 58003515 | 0 |
| CHB | chr11 | PGA3 | 58053515 | 0 |
| CHB | chr11 | PGA3 | 58103515 | 0 |
| CHB | chr11 | PGA3 | 58153515 | 0 |
| CHB | chr11 | PGA3 | 58203515 | 0 |
| CHB | chr11 | PGA3 | 58253515 | 0 |
| CHB | chr11 | PGA3 | 58303515 | 0 |
| CHB | chr11 | PGA3 | 58353515 | 0 |
| CHB | chr11 | PGA3 | 58403515 | 0 |
| CHB | chr11 | PGA3 | 58453515 | 0 |
| CHB | chr11 | PGA3 | 58503515 | 0 |
| CHB | chr11 | PGA3 | 58553515 | 0 |
| CHB | chr11 | PGA3 | 58603515 | 0 |
| CHB | chr11 | PGA3 | 58653515 | 0 |
| CHB | chr11 | PGA3 | 58703515 | 0 |
| CHB | chr11 | PGA3 | 58753515 | 0 |
| CHB | chr11 | PGA3 | 58803515 | 0 |
| CHB | chr11 | PGA3 | 58853515 | 0 |
| CHB | chr11 | PGA3 | 58903515 | 0 |
| CHB | chr11 | PGA3 | 58953515 | 0 |
| CHB | chr11 | PGA3 | 59003515 | 0 |
| CHB | chr11 | PGA3 | 59053515 | 0 |
| CHB | chr11 | PGA3 | 59103515 | 0 |
| CHB | chr11 | PGA3 | 59153515 | 0 |
| CHB | chr11 | PGA3 | 59203515 | 0 |
| CHB | chr11 | PGA3 | 59253515 | 0 |
| CHB | chr11 | PGA3 | 59303515 | 0 |
| CHB | chr11 | PGA3 | 59353515 | 0 |
| CHB | chr11 | PGA3 | 59403515 | 0 |
| CHB | chr11 | PGA3 | 59453515 | 0 |
| CHB | chr11 | PGA3 | 59503515 | 0 |
| CHB | chr11 | PGA3 | 59553515 | 0 |
| CHB | chr11 | PGA3 | 59603515 | 0 |
| CHB | chr11 | PGA3 | 59653515 | 0 |
| CHB | chr11 | PGA3 | 59703515 | 0 |
| CHB | chr11 | PGA3 | 59753515 | 0 |
| CHB | chr11 | PGA3 | 59803515 | 0 |
| CHB | chr11 | PGA3 | 59853515 | 0 |
| CHB | chr11 | PGA3 | 59903515 | 0 |
| CHB | chr11 | PGA3 | 59953515 | 0 |

3\_Introgression\_data

|     |       |      |          |    |
|-----|-------|------|----------|----|
| CHB | chr11 | PGA3 | 60003515 | 0  |
| CHB | chr11 | PGA3 | 60053515 | 0  |
| CHB | chr11 | PGA3 | 60103515 | 0  |
| CHB | chr11 | PGA3 | 60153515 | 0  |
| CHB | chr11 | PGA3 | 60203515 | 0  |
| CHB | chr11 | PGA3 | 60253515 | 0  |
| CHB | chr11 | PGA3 | 60303515 | 0  |
| CHB | chr11 | PGA3 | 60353515 | 0  |
| CHB | chr11 | PGA3 | 60403515 | 0  |
| CHB | chr11 | PGA3 | 60453515 | 0  |
| CHB | chr11 | PGA3 | 60503515 | 0  |
| CHB | chr11 | PGA3 | 60553515 | 0  |
| CHB | chr11 | PGA3 | 60603515 | 0  |
| CHB | chr11 | PGA3 | 60653515 | 0  |
| CHB | chr11 | PGA3 | 60703515 | 0  |
| CHB | chr11 | PGA3 | 60753515 | 0  |
| CHB | chr11 | PGA3 | 60803515 | 0  |
| CHB | chr11 | PGA3 | 60853515 | 0  |
| CHB | chr11 | PGA3 | 60903515 | 0  |
| CHB | chr11 | PGA3 | 60953515 | 0  |
| CHB | chr11 | PGA3 | 61003515 | 0  |
| CHB | chr11 | PGA3 | 61053515 | 0  |
| CHB | chr11 | PGA3 | 61103515 | 0  |
| CHB | chr11 | PGA3 | 61153515 | 0  |
| CHB | chr11 | PGA3 | 61203515 | 0  |
| CHB | chr11 | PGA3 | 61253515 | 0  |
| CHB | chr11 | PGA3 | 61303515 | 0  |
| CHB | chr11 | PGA3 | 61353515 | 0  |
| CHB | chr11 | PGA3 | 61403515 | 0  |
| CHB | chr11 | PGA3 | 61453515 | 0  |
| CHB | chr11 | PGA3 | 61503515 | 0  |
| CHB | chr11 | PGA3 | 61553515 | 0  |
| CHB | chr11 | PGA3 | 61603515 | 0  |
| CHB | chr11 | PGA3 | 61653515 | 0  |
| CHB | chr11 | PGA3 | 61703515 | 0  |
| CHB | chr11 | PGA3 | 61753515 | 0  |
| CHB | chr11 | PGA3 | 61803515 | 0  |
| CHB | chr11 | PGA3 | 61853515 | 0  |
| CHB | chr11 | PGA3 | 61903515 | 0  |
| CHB | chr11 | PGA3 | 61953515 | 26 |
| CHB | chr11 | PGA3 | 62003515 | 48 |
| CHB | chr11 | PGA3 | 62053515 | 33 |
| CHB | chr11 | PGA3 | 62103515 | 37 |
| CHB | chr11 | PGA3 | 62153515 | 62 |
| CHB | chr11 | PGA3 | 62203515 | 36 |
| CHB | chr11 | PGA3 | 62253515 | 0  |
| CHB | chr11 | PGA3 | 62303515 | 0  |
| CHB | chr11 | PGA3 | 62353515 | 0  |
| CHB | chr11 | PGA3 | 62403515 | 0  |

## 3\_Introgression\_data

|     |       |      |          |   |
|-----|-------|------|----------|---|
| CHB | chr11 | PGA3 | 62453515 | 0 |
| CHB | chr11 | PGA3 | 62503515 | 0 |
| CHB | chr11 | PGA3 | 62553515 | 0 |
| CHB | chr11 | PGA3 | 62603515 | 0 |
| CHB | chr11 | PGA3 | 62653515 | 0 |
| CHB | chr11 | PGA3 | 62703515 | 0 |
| CHB | chr11 | PGA3 | 62753515 | 0 |
| CHB | chr11 | PGA3 | 62803515 | 0 |
| CHB | chr11 | PGA3 | 62853515 | 0 |
| CHB | chr11 | PGA3 | 62903515 | 0 |
| CHB | chr11 | PGA3 | 62953515 | 0 |
| CHB | chr11 | PGA3 | 63003515 | 0 |
| CHB | chr11 | PGA3 | 63053515 | 0 |
| CHB | chr11 | PGA3 | 63103515 | 0 |
| CHB | chr11 | PGA3 | 63153515 | 0 |
| CHB | chr11 | PGA3 | 63203515 | 0 |
| CHB | chr11 | PGA3 | 63253515 | 0 |
| CHB | chr11 | PGA3 | 63303515 | 0 |
| CHB | chr11 | PGA3 | 63353515 | 0 |
| CHB | chr11 | PGA3 | 63403515 | 0 |
| CHB | chr11 | PGA3 | 63453515 | 0 |
| CHB | chr11 | PGA3 | 63503515 | 0 |
| CHB | chr11 | PGA3 | 63553515 | 0 |
| CHB | chr11 | PGA3 | 63603515 | 0 |
| CHB | chr11 | PGA3 | 63653515 | 0 |
| CHB | chr11 | PGA3 | 63703515 | 0 |
| CHB | chr11 | PGA3 | 63753515 | 0 |
| CHB | chr11 | PGA3 | 63803515 | 0 |
| CHB | chr11 | PGA3 | 63853515 | 0 |
| CHB | chr11 | PGA3 | 63903515 | 0 |
| CHB | chr11 | PGA3 | 63953515 | 0 |
| CHB | chr11 | PGA3 | 64003515 | 0 |
| CHB | chr11 | PGA3 | 64053515 | 0 |
| CHB | chr11 | PGA3 | 64103515 | 0 |
| CHB | chr11 | PGA3 | 64153515 | 0 |
| CHB | chr11 | PGA3 | 64203515 | 0 |
| CHB | chr11 | PGA3 | 64253515 | 0 |
| CHB | chr11 | PGA3 | 64303515 | 0 |
| CHB | chr11 | PGA3 | 64353515 | 0 |
| CHB | chr11 | PGA3 | 64403515 | 0 |
| CHB | chr11 | PGA3 | 64453515 | 0 |
| CHB | chr11 | PGA3 | 64503515 | 0 |
| CHB | chr11 | PGA3 | 64553515 | 0 |
| CHB | chr11 | PGA3 | 64603515 | 0 |
| CHB | chr11 | PGA3 | 64653515 | 0 |
| CHB | chr11 | PGA3 | 64703515 | 0 |
| CHB | chr11 | PGA3 | 64753515 | 0 |
| CHB | chr11 | PGA3 | 64803515 | 0 |
| CHB | chr11 | PGA3 | 64853515 | 0 |

## 3\_Introgression\_data

|     |       |          |          |    |
|-----|-------|----------|----------|----|
| CHB | chr11 | PGA3     | 64903515 | 0  |
| CHB | chr11 | PGA3     | 64953515 | 0  |
| CHB | chr11 | PGA3     | 65003515 | 0  |
| CHB | chr11 | PGA3     | 65053515 | 0  |
| CHB | chr11 | PGA3     | 65103515 | 0  |
| CHB | chr11 | PGA3     | 65153515 | 0  |
| CHB | chr11 | PGA3     | 65203515 | 0  |
| CHB | chr11 | PGA3     | 65253515 | 0  |
| CHB | chr11 | PGA3     | 65303515 | 0  |
| CHB | chr11 | PGA3     | 65353515 | 0  |
| CHB | chr11 | PGA3     | 65403515 | 0  |
| CHB | chr11 | PGA3     | 65453515 | 0  |
| CHB | chr11 | PGA3     | 65503515 | 0  |
| CHB | chr11 | PGA3     | 65553515 | 0  |
| CHB | chr11 | PGA3     | 65603515 | 0  |
| CHB | chr11 | PGA3     | 65653515 | 0  |
| CHB | chr11 | PGA3     | 65703515 | 0  |
| CHB | chr11 | PGA3     | 65753515 | 0  |
| CHB | chr11 | PGA3     | 65803515 | 0  |
| CHB | chr11 | PGA3     | 65853515 | 0  |
| CHB | chr11 | PGA3     | 65903515 | 0  |
| CHB | chr11 | PGA3     | 65953515 | 0  |
| CHB | chr11 | PGA3     | 66003515 | 0  |
| CHB | chr11 | PGA3     | 66053515 | 0  |
| CHB | chr11 | PGA3     | 66103515 | 0  |
| CHB | chr11 | PGA3     | 66153515 | 0  |
| CHB | chr1  | PRAMEF14 | 8391892  | 0  |
| CHB | chr1  | PRAMEF14 | 8441892  | 0  |
| CHB | chr1  | PRAMEF14 | 8491892  | 0  |
| CHB | chr1  | PRAMEF14 | 8541892  | 0  |
| CHB | chr1  | PRAMEF14 | 8591892  | 0  |
| CHB | chr1  | PRAMEF14 | 8641892  | 0  |
| CHB | chr1  | PRAMEF14 | 8691892  | 0  |
| CHB | chr1  | PRAMEF14 | 8741892  | 0  |
| CHB | chr1  | PRAMEF14 | 8791892  | 0  |
| CHB | chr1  | PRAMEF14 | 8841892  | 0  |
| CHB | chr1  | PRAMEF14 | 8891892  | 0  |
| CHB | chr1  | PRAMEF14 | 8941892  | 0  |
| CHB | chr1  | PRAMEF14 | 8991892  | 0  |
| CHB | chr1  | PRAMEF14 | 9041892  | 0  |
| CHB | chr1  | PRAMEF14 | 9091892  | 0  |
| CHB | chr1  | PRAMEF14 | 9141892  | 0  |
| CHB | chr1  | PRAMEF14 | 9191892  | 0  |
| CHB | chr1  | PRAMEF14 | 9241892  | 0  |
| CHB | chr1  | PRAMEF14 | 9291892  | 0  |
| CHB | chr1  | PRAMEF14 | 9341892  | 0  |
| CHB | chr1  | PRAMEF14 | 9391892  | 0  |
| CHB | chr1  | PRAMEF14 | 9441892  | 12 |
| CHB | chr1  | PRAMEF14 | 9491892  | 39 |

## 3\_Introgression\_data

|     |      |          |          |     |
|-----|------|----------|----------|-----|
| CHB | chr1 | PRAMEF14 | 9541892  | 44  |
| CHB | chr1 | PRAMEF14 | 9591892  | 38  |
| CHB | chr1 | PRAMEF14 | 9641892  | 36  |
| CHB | chr1 | PRAMEF14 | 9691892  | 55  |
| CHB | chr1 | PRAMEF14 | 9741892  | 70  |
| CHB | chr1 | PRAMEF14 | 9791892  | 101 |
| CHB | chr1 | PRAMEF14 | 9841892  | 91  |
| CHB | chr1 | PRAMEF14 | 9891892  | 20  |
| CHB | chr1 | PRAMEF14 | 9941892  | 0   |
| CHB | chr1 | PRAMEF14 | 9991892  | 0   |
| CHB | chr1 | PRAMEF14 | 10041892 | 0   |
| CHB | chr1 | PRAMEF14 | 10091892 | 0   |
| CHB | chr1 | PRAMEF14 | 10141892 | 0   |
| CHB | chr1 | PRAMEF14 | 10191892 | 0   |
| CHB | chr1 | PRAMEF14 | 10241892 | 0   |
| CHB | chr1 | PRAMEF14 | 10291892 | 0   |
| CHB | chr1 | PRAMEF14 | 10341892 | 0   |
| CHB | chr1 | PRAMEF14 | 10391892 | 0   |
| CHB | chr1 | PRAMEF14 | 10441892 | 0   |
| CHB | chr1 | PRAMEF14 | 10491892 | 0   |
| CHB | chr1 | PRAMEF14 | 10541892 | 0   |
| CHB | chr1 | PRAMEF14 | 10591892 | 0   |
| CHB | chr1 | PRAMEF14 | 10641892 | 0   |
| CHB | chr1 | PRAMEF14 | 10691892 | 0   |
| CHB | chr1 | PRAMEF14 | 10741892 | 20  |
| CHB | chr1 | PRAMEF14 | 10791892 | 36  |
| CHB | chr1 | PRAMEF14 | 10841892 | 31  |
| CHB | chr1 | PRAMEF14 | 10891892 | 15  |
| CHB | chr1 | PRAMEF14 | 10941892 | 0   |
| CHB | chr1 | PRAMEF14 | 10991892 | 0   |
| CHB | chr1 | PRAMEF14 | 11041892 | 0   |
| CHB | chr1 | PRAMEF14 | 11091892 | 0   |
| CHB | chr1 | PRAMEF14 | 11141892 | 0   |
| CHB | chr1 | PRAMEF14 | 11191892 | 0   |
| CHB | chr1 | PRAMEF14 | 11241892 | 0   |
| CHB | chr1 | PRAMEF14 | 11291892 | 6   |
| CHB | chr1 | PRAMEF14 | 11341892 | 21  |
| CHB | chr1 | PRAMEF14 | 11391892 | 47  |
| CHB | chr1 | PRAMEF14 | 11441892 | 43  |
| CHB | chr1 | PRAMEF14 | 11491892 | 21  |
| CHB | chr1 | PRAMEF14 | 11541892 | 27  |
| CHB | chr1 | PRAMEF14 | 11591892 | 41  |
| CHB | chr1 | PRAMEF14 | 11641892 | 24  |
| CHB | chr1 | PRAMEF14 | 11691892 | 0   |
| CHB | chr1 | PRAMEF14 | 11741892 | 0   |
| CHB | chr1 | PRAMEF14 | 11791892 | 0   |
| CHB | chr1 | PRAMEF14 | 11841892 | 0   |
| CHB | chr1 | PRAMEF14 | 11891892 | 19  |
| CHB | chr1 | PRAMEF14 | 11941892 | 50  |

## 3\_Introgression\_data

|     |      |          |          |     |
|-----|------|----------|----------|-----|
| CHB | chr1 | PRAMEF14 | 11991892 | 56  |
| CHB | chr1 | PRAMEF14 | 12041892 | 76  |
| CHB | chr1 | PRAMEF14 | 12091892 | 87  |
| CHB | chr1 | PRAMEF14 | 12141892 | 62  |
| CHB | chr1 | PRAMEF14 | 12191892 | 26  |
| CHB | chr1 | PRAMEF14 | 12241892 | 13  |
| CHB | chr1 | PRAMEF14 | 12291892 | 26  |
| CHB | chr1 | PRAMEF14 | 12341892 | 37  |
| CHB | chr1 | PRAMEF14 | 12391892 | 45  |
| CHB | chr1 | PRAMEF14 | 12441892 | 35  |
| CHB | chr1 | PRAMEF14 | 12491892 | 24  |
| CHB | chr1 | PRAMEF14 | 12541892 | 45  |
| CHB | chr1 | PRAMEF14 | 12591892 | 35  |
| CHB | chr1 | PRAMEF14 | 12641892 | 0   |
| CHB | chr1 | PRAMEF14 | 12691892 | 0   |
| CHB | chr1 | PRAMEF14 | 12741892 | 7   |
| CHB | chr1 | PRAMEF14 | 12791892 | 29  |
| CHB | chr1 | PRAMEF14 | 12841892 | 113 |
| CHB | chr1 | PRAMEF14 | 12891892 | 91  |
| CHB | chr1 | PRAMEF14 | 12941892 | 0   |
| CHB | chr1 | PRAMEF14 | 12991892 | 0   |
| CHB | chr1 | PRAMEF14 | 13041892 | 0   |
| CHB | chr1 | PRAMEF14 | 13091892 | 0   |
| CHB | chr1 | PRAMEF14 | 13141892 | 0   |
| CHB | chr1 | PRAMEF14 | 13191892 | 0   |
| CHB | chr1 | PRAMEF14 | 13241892 | 0   |
| CHB | chr1 | PRAMEF14 | 13291892 | 0   |
| CHB | chr1 | PRAMEF14 | 13341892 | 0   |
| CHB | chr1 | PRAMEF14 | 13391892 | 0   |
| CHB | chr1 | PRAMEF14 | 13441892 | 0   |
| CHB | chr1 | PRAMEF14 | 13491892 | 0   |
| CHB | chr1 | PRAMEF14 | 13541892 | 0   |
| CHB | chr1 | PRAMEF14 | 13591892 | 0   |
| CHB | chr1 | PRAMEF14 | 13641892 | 0   |
| CHB | chr1 | PRAMEF14 | 13691892 | 0   |
| CHB | chr1 | PRAMEF14 | 13741892 | 0   |
| CHB | chr1 | PRAMEF14 | 13791892 | 21  |
| CHB | chr1 | PRAMEF14 | 13841892 | 43  |
| CHB | chr1 | PRAMEF14 | 13891892 | 30  |
| CHB | chr1 | PRAMEF14 | 13941892 | 20  |
| CHB | chr1 | PRAMEF14 | 13991892 | 59  |
| CHB | chr1 | PRAMEF14 | 14041892 | 89  |
| CHB | chr1 | PRAMEF14 | 14091892 | 83  |
| CHB | chr1 | PRAMEF14 | 14141892 | 73  |
| CHB | chr1 | PRAMEF14 | 14191892 | 67  |
| CHB | chr1 | PRAMEF14 | 14241892 | 52  |
| CHB | chr1 | PRAMEF14 | 14291892 | 29  |
| CHB | chr1 | PRAMEF14 | 14341892 | 30  |
| CHB | chr1 | PRAMEF14 | 14391892 | 82  |



## 3\_Introgression\_data

|     |      |          |          |    |
|-----|------|----------|----------|----|
| CHB | chr1 | PRAMEF14 | 14441892 | 86 |
| CHB | chr1 | PRAMEF14 | 14491892 | 44 |
| CHB | chr1 | PRAMEF14 | 14541892 | 39 |
| CHB | chr1 | PRAMEF14 | 14591892 | 28 |
| CHB | chr1 | PRAMEF14 | 14641892 | 11 |
| CHB | chr1 | PRAMEF14 | 14691892 | 0  |
| CHB | chr1 | PRAMEF14 | 14741892 | 0  |
| CHB | chr1 | PRAMEF14 | 14791892 | 0  |
| CHB | chr1 | PRAMEF14 | 14841892 | 0  |
| CHB | chr1 | PRAMEF14 | 14891892 | 0  |
| CHB | chr1 | PRAMEF14 | 14941892 | 0  |
| CHB | chr1 | PRAMEF14 | 14991892 | 0  |
| CHB | chr1 | PRAMEF14 | 15041892 | 0  |
| CHB | chr1 | PRAMEF14 | 15091892 | 0  |
| CHB | chr1 | PRAMEF14 | 15141892 | 0  |
| CHB | chr1 | PRAMEF14 | 15191892 | 0  |
| CHB | chr1 | PRAMEF14 | 15241892 | 0  |
| CHB | chr1 | PRAMEF14 | 15291892 | 0  |
| CHB | chr1 | PRAMEF14 | 15341892 | 33 |
| CHB | chr1 | PRAMEF14 | 15391892 | 59 |
| CHB | chr1 | PRAMEF14 | 15441892 | 38 |
| CHB | chr1 | PRAMEF14 | 15491892 | 29 |
| CHB | chr1 | PRAMEF14 | 15541892 | 23 |
| CHB | chr1 | PRAMEF14 | 15591892 | 6  |
| CHB | chr1 | PRAMEF14 | 15641892 | 0  |
| CHB | chr1 | PRAMEF14 | 15691892 | 0  |
| CHB | chr1 | PRAMEF14 | 15741892 | 0  |
| CHB | chr1 | PRAMEF14 | 15791892 | 0  |
| CHB | chr1 | PRAMEF14 | 15841892 | 0  |
| CHB | chr1 | PRAMEF14 | 15891892 | 0  |
| CHB | chr1 | PRAMEF14 | 15941892 | 0  |
| CHB | chr1 | PRAMEF14 | 15991892 | 0  |
| CHB | chr1 | PRAMEF14 | 16041892 | 17 |
| CHB | chr1 | PRAMEF14 | 16091892 | 41 |
| CHB | chr1 | PRAMEF14 | 16141892 | 50 |
| CHB | chr1 | PRAMEF14 | 16191892 | 44 |
| CHB | chr1 | PRAMEF14 | 16241892 | 28 |
| CHB | chr1 | PRAMEF14 | 16291892 | 35 |
| CHB | chr1 | PRAMEF14 | 16341892 | 44 |
| CHB | chr1 | PRAMEF14 | 16391892 | 21 |
| CHB | chr1 | PRAMEF14 | 16441892 | 2  |
| CHB | chr1 | PRAMEF14 | 16491892 | 0  |
| CHB | chr1 | PRAMEF14 | 16541892 | 0  |
| CHB | chr1 | PRAMEF14 | 16591892 | 14 |
| CHB | chr1 | PRAMEF14 | 16641892 | 26 |
| CHB | chr1 | PRAMEF14 | 16691892 | 45 |
| CHB | chr1 | PRAMEF14 | 16741892 | 58 |
| CHB | chr1 | PRAMEF14 | 16791892 | 53 |
| CHB | chr1 | PRAMEF14 | 16841892 | 28 |

## 3\_Introgression\_data

|     |      |          |          |    |
|-----|------|----------|----------|----|
| CHB | chr1 | PRAMEF14 | 16891892 | 0  |
| CHB | chr1 | PRAMEF14 | 16941892 | 0  |
| CHB | chr1 | PRAMEF14 | 16991892 | 0  |
| CHB | chr1 | PRAMEF14 | 17041892 | 0  |
| CHB | chr1 | PRAMEF14 | 17091892 | 0  |
| CHB | chr1 | PRAMEF14 | 17141892 | 0  |
| CHB | chr1 | PRAMEF14 | 17191892 | 0  |
| CHB | chr1 | PRAMEF14 | 17241892 | 0  |
| CHB | chr1 | PRAMEF14 | 17291892 | 0  |
| CHB | chr1 | PRAMEF14 | 17341892 | 0  |
| CHB | chr1 | PRAMEF14 | 17391892 | 0  |
| CHB | chr1 | PRAMEF14 | 17441892 | 0  |
| CHB | chr1 | PRAMEF14 | 17491892 | 0  |
| CHB | chr1 | PRAMEF14 | 17541892 | 0  |
| CHB | chr1 | PRAMEF14 | 17591892 | 0  |
| CHB | chr1 | PRAMEF14 | 17641892 | 0  |
| CHB | chr1 | PRAMEF14 | 17691892 | 0  |
| CHB | chr1 | PRAMEF14 | 17741892 | 0  |
| CHB | chr1 | PRAMEF14 | 17791892 | 0  |
| CHB | chr1 | PRAMEF14 | 17841892 | 0  |
| CHB | chr1 | PRAMEF14 | 17891892 | 0  |
| CHB | chr1 | PRAMEF14 | 17941892 | 0  |
| CHB | chr1 | PRAMEF14 | 17991892 | 0  |
| CHB | chr1 | PRAMEF14 | 18041892 | 0  |
| CHB | chr1 | PRAMEF14 | 18091892 | 0  |
| CHB | chr1 | PRAMEF14 | 18141892 | 0  |
| CHB | chr1 | PRAMEF14 | 18191892 | 0  |
| CHB | chr1 | PRAMEF14 | 18241892 | 0  |
| CHB | chr1 | PRAMEF14 | 18291892 | 10 |
| CHB | chr1 | PRAMEF20 | 8460450  | 0  |
| CHB | chr1 | PRAMEF20 | 8510450  | 0  |
| CHB | chr1 | PRAMEF20 | 8560450  | 0  |
| CHB | chr1 | PRAMEF20 | 8610450  | 0  |
| CHB | chr1 | PRAMEF20 | 8660450  | 0  |
| CHB | chr1 | PRAMEF20 | 8710450  | 0  |
| CHB | chr1 | PRAMEF20 | 8760450  | 0  |
| CHB | chr1 | PRAMEF20 | 8810450  | 0  |
| CHB | chr1 | PRAMEF20 | 8860450  | 0  |
| CHB | chr1 | PRAMEF20 | 8910450  | 0  |
| CHB | chr1 | PRAMEF20 | 8960450  | 0  |
| CHB | chr1 | PRAMEF20 | 9010450  | 0  |
| CHB | chr1 | PRAMEF20 | 9060450  | 0  |
| CHB | chr1 | PRAMEF20 | 9110450  | 0  |
| CHB | chr1 | PRAMEF20 | 9160450  | 0  |
| CHB | chr1 | PRAMEF20 | 9210450  | 0  |
| CHB | chr1 | PRAMEF20 | 9260450  | 0  |
| CHB | chr1 | PRAMEF20 | 9310450  | 0  |
| CHB | chr1 | PRAMEF20 | 9360450  | 0  |
| CHB | chr1 | PRAMEF20 | 9410450  | 0  |

## 3\_Introgression\_data

|     |      |          |          |     |
|-----|------|----------|----------|-----|
| CHB | chr1 | PRAMEF20 | 9460450  | 17  |
| CHB | chr1 | PRAMEF20 | 9510450  | 43  |
| CHB | chr1 | PRAMEF20 | 9560450  | 49  |
| CHB | chr1 | PRAMEF20 | 9610450  | 40  |
| CHB | chr1 | PRAMEF20 | 9660450  | 39  |
| CHB | chr1 | PRAMEF20 | 9710450  | 55  |
| CHB | chr1 | PRAMEF20 | 9760450  | 85  |
| CHB | chr1 | PRAMEF20 | 9810450  | 104 |
| CHB | chr1 | PRAMEF20 | 9860450  | 63  |
| CHB | chr1 | PRAMEF20 | 9910450  | 11  |
| CHB | chr1 | PRAMEF20 | 9960450  | 0   |
| CHB | chr1 | PRAMEF20 | 10010450 | 0   |
| CHB | chr1 | PRAMEF20 | 10060450 | 0   |
| CHB | chr1 | PRAMEF20 | 10110450 | 0   |
| CHB | chr1 | PRAMEF20 | 10160450 | 0   |
| CHB | chr1 | PRAMEF20 | 10210450 | 0   |
| CHB | chr1 | PRAMEF20 | 10260450 | 0   |
| CHB | chr1 | PRAMEF20 | 10310450 | 0   |
| CHB | chr1 | PRAMEF20 | 10360450 | 0   |
| CHB | chr1 | PRAMEF20 | 10410450 | 0   |
| CHB | chr1 | PRAMEF20 | 10460450 | 0   |
| CHB | chr1 | PRAMEF20 | 10510450 | 0   |
| CHB | chr1 | PRAMEF20 | 10560450 | 0   |
| CHB | chr1 | PRAMEF20 | 10610450 | 0   |
| CHB | chr1 | PRAMEF20 | 10660450 | 0   |
| CHB | chr1 | PRAMEF20 | 10710450 | 1   |
| CHB | chr1 | PRAMEF20 | 10760450 | 27  |
| CHB | chr1 | PRAMEF20 | 10810450 | 46  |
| CHB | chr1 | PRAMEF20 | 10860450 | 24  |
| CHB | chr1 | PRAMEF20 | 10910450 | 4   |
| CHB | chr1 | PRAMEF20 | 10960450 | 0   |
| CHB | chr1 | PRAMEF20 | 11010450 | 0   |
| CHB | chr1 | PRAMEF20 | 11060450 | 0   |
| CHB | chr1 | PRAMEF20 | 11110450 | 0   |
| CHB | chr1 | PRAMEF20 | 11160450 | 0   |
| CHB | chr1 | PRAMEF20 | 11210450 | 0   |
| CHB | chr1 | PRAMEF20 | 11260450 | 0   |
| CHB | chr1 | PRAMEF20 | 11310450 | 10  |
| CHB | chr1 | PRAMEF20 | 11360450 | 30  |
| CHB | chr1 | PRAMEF20 | 11410450 | 46  |
| CHB | chr1 | PRAMEF20 | 11460450 | 36  |
| CHB | chr1 | PRAMEF20 | 11510450 | 24  |
| CHB | chr1 | PRAMEF20 | 11560450 | 37  |
| CHB | chr1 | PRAMEF20 | 11610450 | 35  |
| CHB | chr1 | PRAMEF20 | 11660450 | 12  |
| CHB | chr1 | PRAMEF20 | 11710450 | 0   |
| CHB | chr1 | PRAMEF20 | 11760450 | 0   |
| CHB | chr1 | PRAMEF20 | 11810450 | 0   |
| CHB | chr1 | PRAMEF20 | 11860450 | 3   |

## 3\_Introgression\_data

|     |      |          |          |     |
|-----|------|----------|----------|-----|
| CHB | chr1 | PRAMEF20 | 11910450 | 25  |
| CHB | chr1 | PRAMEF20 | 11960450 | 52  |
| CHB | chr1 | PRAMEF20 | 12010450 | 66  |
| CHB | chr1 | PRAMEF20 | 12060450 | 102 |
| CHB | chr1 | PRAMEF20 | 12110450 | 76  |
| CHB | chr1 | PRAMEF20 | 12160450 | 31  |
| CHB | chr1 | PRAMEF20 | 12210450 | 21  |
| CHB | chr1 | PRAMEF20 | 12260450 | 17  |
| CHB | chr1 | PRAMEF20 | 12310450 | 36  |
| CHB | chr1 | PRAMEF20 | 12360450 | 37  |
| CHB | chr1 | PRAMEF20 | 12410450 | 42  |
| CHB | chr1 | PRAMEF20 | 12460450 | 35  |
| CHB | chr1 | PRAMEF20 | 12510450 | 23  |
| CHB | chr1 | PRAMEF20 | 12560450 | 41  |
| CHB | chr1 | PRAMEF20 | 12610450 | 29  |
| CHB | chr1 | PRAMEF20 | 12660450 | 0   |
| CHB | chr1 | PRAMEF20 | 12710450 | 0   |
| CHB | chr1 | PRAMEF20 | 12760450 | 13  |
| CHB | chr1 | PRAMEF20 | 12810450 | 32  |
| CHB | chr1 | PRAMEF20 | 12860450 | 107 |
| CHB | chr1 | PRAMEF20 | 12910450 | 88  |
| CHB | chr1 | PRAMEF20 | 12960450 | 0   |
| CHB | chr1 | PRAMEF20 | 13010450 | 0   |
| CHB | chr1 | PRAMEF20 | 13060450 | 0   |
| CHB | chr1 | PRAMEF20 | 13110450 | 0   |
| CHB | chr1 | PRAMEF20 | 13160450 | 0   |
| CHB | chr1 | PRAMEF20 | 13210450 | 0   |
| CHB | chr1 | PRAMEF20 | 13260450 | 0   |
| CHB | chr1 | PRAMEF20 | 13310450 | 0   |
| CHB | chr1 | PRAMEF20 | 13360450 | 0   |
| CHB | chr1 | PRAMEF20 | 13410450 | 0   |
| CHB | chr1 | PRAMEF20 | 13460450 | 0   |
| CHB | chr1 | PRAMEF20 | 13510450 | 0   |
| CHB | chr1 | PRAMEF20 | 13560450 | 0   |
| CHB | chr1 | PRAMEF20 | 13610450 | 0   |
| CHB | chr1 | PRAMEF20 | 13660450 | 0   |
| CHB | chr1 | PRAMEF20 | 13710450 | 0   |
| CHB | chr1 | PRAMEF20 | 13760450 | 0   |
| CHB | chr1 | PRAMEF20 | 13810450 | 29  |
| CHB | chr1 | PRAMEF20 | 13860450 | 44  |
| CHB | chr1 | PRAMEF20 | 13910450 | 27  |
| CHB | chr1 | PRAMEF20 | 13960450 | 37  |
| CHB | chr1 | PRAMEF20 | 14010450 | 74  |
| CHB | chr1 | PRAMEF20 | 14060450 | 95  |
| CHB | chr1 | PRAMEF20 | 14110450 | 76  |
| CHB | chr1 | PRAMEF20 | 14160450 | 66  |
| CHB | chr1 | PRAMEF20 | 14210450 | 62  |
| CHB | chr1 | PRAMEF20 | 14260450 | 38  |
| CHB | chr1 | PRAMEF20 | 14310450 | 24  |

## 3\_Introgression\_data

|     |      |          |          |    |
|-----|------|----------|----------|----|
| CHB | chr1 | PRAMEF20 | 14360450 | 35 |
| CHB | chr1 | PRAMEF20 | 14410450 | 87 |
| CHB | chr1 | PRAMEF20 | 14460450 | 90 |
| CHB | chr1 | PRAMEF20 | 14510450 | 40 |
| CHB | chr1 | PRAMEF20 | 14560450 | 34 |
| CHB | chr1 | PRAMEF20 | 14610450 | 24 |
| CHB | chr1 | PRAMEF20 | 14660450 | 4  |
| CHB | chr1 | PRAMEF20 | 14710450 | 0  |
| CHB | chr1 | PRAMEF20 | 14760450 | 0  |
| CHB | chr1 | PRAMEF20 | 14810450 | 0  |
| CHB | chr1 | PRAMEF20 | 14860450 | 0  |
| CHB | chr1 | PRAMEF20 | 14910450 | 0  |
| CHB | chr1 | PRAMEF20 | 14960450 | 0  |
| CHB | chr1 | PRAMEF20 | 15010450 | 0  |
| CHB | chr1 | PRAMEF20 | 15060450 | 0  |
| CHB | chr1 | PRAMEF20 | 15110450 | 0  |
| CHB | chr1 | PRAMEF20 | 15160450 | 0  |
| CHB | chr1 | PRAMEF20 | 15210450 | 0  |
| CHB | chr1 | PRAMEF20 | 15260450 | 0  |
| CHB | chr1 | PRAMEF20 | 15310450 | 0  |
| CHB | chr1 | PRAMEF20 | 15360450 | 47 |
| CHB | chr1 | PRAMEF20 | 15410450 | 64 |
| CHB | chr1 | PRAMEF20 | 15460450 | 32 |
| CHB | chr1 | PRAMEF20 | 15510450 | 28 |
| CHB | chr1 | PRAMEF20 | 15560450 | 15 |
| CHB | chr1 | PRAMEF20 | 15610450 | 2  |
| CHB | chr1 | PRAMEF20 | 15660450 | 0  |
| CHB | chr1 | PRAMEF20 | 15710450 | 0  |
| CHB | chr1 | PRAMEF20 | 15760450 | 0  |
| CHB | chr1 | PRAMEF20 | 15810450 | 0  |
| CHB | chr1 | PRAMEF20 | 15860450 | 0  |
| CHB | chr1 | PRAMEF20 | 15910450 | 0  |
| CHB | chr1 | PRAMEF20 | 15960450 | 0  |
| CHB | chr1 | PRAMEF20 | 16010450 | 0  |
| CHB | chr1 | PRAMEF20 | 16060450 | 26 |
| CHB | chr1 | PRAMEF20 | 16110450 | 48 |
| CHB | chr1 | PRAMEF20 | 16160450 | 48 |
| CHB | chr1 | PRAMEF20 | 16210450 | 41 |
| CHB | chr1 | PRAMEF20 | 16260450 | 26 |
| CHB | chr1 | PRAMEF20 | 16310450 | 37 |
| CHB | chr1 | PRAMEF20 | 16360450 | 41 |
| CHB | chr1 | PRAMEF20 | 16410450 | 15 |
| CHB | chr1 | PRAMEF20 | 16460450 | 0  |
| CHB | chr1 | PRAMEF20 | 16510450 | 0  |
| CHB | chr1 | PRAMEF20 | 16560450 | 7  |
| CHB | chr1 | PRAMEF20 | 16610450 | 20 |
| CHB | chr1 | PRAMEF20 | 16660450 | 31 |
| CHB | chr1 | PRAMEF20 | 16710450 | 45 |
| CHB | chr1 | PRAMEF20 | 16760450 | 63 |

## 3\_Introgression\_data

|     |      |          |          |    |
|-----|------|----------|----------|----|
| CHB | chr1 | PRAMEF20 | 16810450 | 47 |
| CHB | chr1 | PRAMEF20 | 16860450 | 11 |
| CHB | chr1 | PRAMEF20 | 16910450 | 0  |
| CHB | chr1 | PRAMEF20 | 16960450 | 0  |
| CHB | chr1 | PRAMEF20 | 17010450 | 0  |
| CHB | chr1 | PRAMEF20 | 17060450 | 0  |
| CHB | chr1 | PRAMEF20 | 17110450 | 0  |
| CHB | chr1 | PRAMEF20 | 17160450 | 0  |
| CHB | chr1 | PRAMEF20 | 17210450 | 0  |
| CHB | chr1 | PRAMEF20 | 17260450 | 0  |
| CHB | chr1 | PRAMEF20 | 17310450 | 0  |
| CHB | chr1 | PRAMEF20 | 17360450 | 0  |
| CHB | chr1 | PRAMEF20 | 17410450 | 0  |
| CHB | chr1 | PRAMEF20 | 17460450 | 0  |
| CHB | chr1 | PRAMEF20 | 17510450 | 0  |
| CHB | chr1 | PRAMEF20 | 17560450 | 0  |
| CHB | chr1 | PRAMEF20 | 17610450 | 0  |
| CHB | chr1 | PRAMEF20 | 17660450 | 0  |
| CHB | chr1 | PRAMEF20 | 17710450 | 0  |
| CHB | chr1 | PRAMEF20 | 17760450 | 0  |
| CHB | chr1 | PRAMEF20 | 17810450 | 0  |
| CHB | chr1 | PRAMEF20 | 17860450 | 0  |
| CHB | chr1 | PRAMEF20 | 17910450 | 0  |
| CHB | chr1 | PRAMEF20 | 17960450 | 0  |
| CHB | chr1 | PRAMEF20 | 18010450 | 0  |
| CHB | chr1 | PRAMEF20 | 18060450 | 0  |
| CHB | chr1 | PRAMEF20 | 18110450 | 0  |
| CHB | chr1 | PRAMEF20 | 18160450 | 0  |
| CHB | chr1 | PRAMEF20 | 18210450 | 0  |
| CHB | chr1 | PRAMEF20 | 18260450 | 0  |
| CHB | chr1 | PRAMEF20 | 18310450 | 17 |
| CHB | chr1 | PRAMEF20 | 18360450 | 53 |
| CHB | chr1 | PRAMEF5  | 8304198  | 0  |
| CHB | chr1 | PRAMEF5  | 8354198  | 0  |
| CHB | chr1 | PRAMEF5  | 8404198  | 0  |
| CHB | chr1 | PRAMEF5  | 8454198  | 0  |
| CHB | chr1 | PRAMEF5  | 8504198  | 0  |
| CHB | chr1 | PRAMEF5  | 8554198  | 0  |
| CHB | chr1 | PRAMEF5  | 8604198  | 0  |
| CHB | chr1 | PRAMEF5  | 8654198  | 0  |
| CHB | chr1 | PRAMEF5  | 8704198  | 0  |
| CHB | chr1 | PRAMEF5  | 8754198  | 0  |
| CHB | chr1 | PRAMEF5  | 8804198  | 0  |
| CHB | chr1 | PRAMEF5  | 8854198  | 0  |
| CHB | chr1 | PRAMEF5  | 8904198  | 0  |
| CHB | chr1 | PRAMEF5  | 8954198  | 0  |
| CHB | chr1 | PRAMEF5  | 9004198  | 0  |
| CHB | chr1 | PRAMEF5  | 9054198  | 0  |
| CHB | chr1 | PRAMEF5  | 9104198  | 0  |

3\_Introgression\_data

|     |      |         |          |     |
|-----|------|---------|----------|-----|
| CHB | chr1 | PRAMEF5 | 9154198  | 0   |
| CHB | chr1 | PRAMEF5 | 9204198  | 0   |
| CHB | chr1 | PRAMEF5 | 9254198  | 0   |
| CHB | chr1 | PRAMEF5 | 9304198  | 0   |
| CHB | chr1 | PRAMEF5 | 9354198  | 0   |
| CHB | chr1 | PRAMEF5 | 9404198  | 0   |
| CHB | chr1 | PRAMEF5 | 9454198  | 16  |
| CHB | chr1 | PRAMEF5 | 9504198  | 40  |
| CHB | chr1 | PRAMEF5 | 9554198  | 45  |
| CHB | chr1 | PRAMEF5 | 9604198  | 42  |
| CHB | chr1 | PRAMEF5 | 9654198  | 43  |
| CHB | chr1 | PRAMEF5 | 9704198  | 55  |
| CHB | chr1 | PRAMEF5 | 9754198  | 75  |
| CHB | chr1 | PRAMEF5 | 9804198  | 102 |
| CHB | chr1 | PRAMEF5 | 9854198  | 74  |
| CHB | chr1 | PRAMEF5 | 9904198  | 14  |
| CHB | chr1 | PRAMEF5 | 9954198  | 0   |
| CHB | chr1 | PRAMEF5 | 10004198 | 0   |
| CHB | chr1 | PRAMEF5 | 10054198 | 0   |
| CHB | chr1 | PRAMEF5 | 10104198 | 0   |
| CHB | chr1 | PRAMEF5 | 10154198 | 0   |
| CHB | chr1 | PRAMEF5 | 10204198 | 0   |
| CHB | chr1 | PRAMEF5 | 10254198 | 0   |
| CHB | chr1 | PRAMEF5 | 10304198 | 0   |
| CHB | chr1 | PRAMEF5 | 10354198 | 0   |
| CHB | chr1 | PRAMEF5 | 10404198 | 0   |
| CHB | chr1 | PRAMEF5 | 10454198 | 0   |
| CHB | chr1 | PRAMEF5 | 10504198 | 0   |
| CHB | chr1 | PRAMEF5 | 10554198 | 0   |
| CHB | chr1 | PRAMEF5 | 10604198 | 0   |
| CHB | chr1 | PRAMEF5 | 10654198 | 0   |
| CHB | chr1 | PRAMEF5 | 10704198 | 0   |
| CHB | chr1 | PRAMEF5 | 10754198 | 27  |
| CHB | chr1 | PRAMEF5 | 10804198 | 42  |
| CHB | chr1 | PRAMEF5 | 10854198 | 24  |
| CHB | chr1 | PRAMEF5 | 10904198 | 9   |
| CHB | chr1 | PRAMEF5 | 10954198 | 0   |
| CHB | chr1 | PRAMEF5 | 11004198 | 0   |
| CHB | chr1 | PRAMEF5 | 11054198 | 0   |
| CHB | chr1 | PRAMEF5 | 11104198 | 0   |
| CHB | chr1 | PRAMEF5 | 11154198 | 0   |
| CHB | chr1 | PRAMEF5 | 11204198 | 0   |
| CHB | chr1 | PRAMEF5 | 11254198 | 0   |
| CHB | chr1 | PRAMEF5 | 11304198 | 8   |
| CHB | chr1 | PRAMEF5 | 11354198 | 26  |
| CHB | chr1 | PRAMEF5 | 11404198 | 47  |
| CHB | chr1 | PRAMEF5 | 11454198 | 39  |
| CHB | chr1 | PRAMEF5 | 11504198 | 22  |
| CHB | chr1 | PRAMEF5 | 11554198 | 35  |

## 3\_Introgression\_data

|     |      |         |          |     |
|-----|------|---------|----------|-----|
| CHB | chr1 | PRAMEF5 | 11604198 | 38  |
| CHB | chr1 | PRAMEF5 | 11654198 | 15  |
| CHB | chr1 | PRAMEF5 | 11704198 | 0   |
| CHB | chr1 | PRAMEF5 | 11754198 | 0   |
| CHB | chr1 | PRAMEF5 | 11804198 | 0   |
| CHB | chr1 | PRAMEF5 | 11854198 | 1   |
| CHB | chr1 | PRAMEF5 | 11904198 | 23  |
| CHB | chr1 | PRAMEF5 | 11954198 | 52  |
| CHB | chr1 | PRAMEF5 | 12004198 | 62  |
| CHB | chr1 | PRAMEF5 | 12054198 | 100 |
| CHB | chr1 | PRAMEF5 | 12104198 | 78  |
| CHB | chr1 | PRAMEF5 | 12154198 | 35  |
| CHB | chr1 | PRAMEF5 | 12204198 | 25  |
| CHB | chr1 | PRAMEF5 | 12254198 | 16  |
| CHB | chr1 | PRAMEF5 | 12304198 | 35  |
| CHB | chr1 | PRAMEF5 | 12354198 | 37  |
| CHB | chr1 | PRAMEF5 | 12404198 | 40  |
| CHB | chr1 | PRAMEF5 | 12454198 | 35  |
| CHB | chr1 | PRAMEF5 | 12504198 | 23  |
| CHB | chr1 | PRAMEF5 | 12554198 | 42  |
| CHB | chr1 | PRAMEF5 | 12604198 | 32  |
| CHB | chr1 | PRAMEF5 | 12654198 | 0   |
| CHB | chr1 | PRAMEF5 | 12704198 | 0   |
| CHB | chr1 | PRAMEF5 | 12754198 | 10  |
| CHB | chr1 | PRAMEF5 | 12804198 | 29  |
| CHB | chr1 | PRAMEF5 | 12854198 | 110 |
| CHB | chr1 | PRAMEF5 | 12904198 | 91  |
| CHB | chr1 | PRAMEF5 | 12954198 | 0   |
| CHB | chr1 | PRAMEF5 | 13004198 | 0   |
| CHB | chr1 | PRAMEF5 | 13054198 | 0   |
| CHB | chr1 | PRAMEF5 | 13104198 | 0   |
| CHB | chr1 | PRAMEF5 | 13154198 | 0   |
| CHB | chr1 | PRAMEF5 | 13204198 | 0   |
| CHB | chr1 | PRAMEF5 | 13254198 | 0   |
| CHB | chr1 | PRAMEF5 | 13304198 | 0   |
| CHB | chr1 | PRAMEF5 | 13354198 | 0   |
| CHB | chr1 | PRAMEF5 | 13404198 | 0   |
| CHB | chr1 | PRAMEF5 | 13454198 | 0   |
| CHB | chr1 | PRAMEF5 | 13504198 | 0   |
| CHB | chr1 | PRAMEF5 | 13554198 | 0   |
| CHB | chr1 | PRAMEF5 | 13604198 | 0   |
| CHB | chr1 | PRAMEF5 | 13654198 | 0   |
| CHB | chr1 | PRAMEF5 | 13704198 | 0   |
| CHB | chr1 | PRAMEF5 | 13754198 | 0   |
| CHB | chr1 | PRAMEF5 | 13804198 | 25  |
| CHB | chr1 | PRAMEF5 | 13854198 | 43  |
| CHB | chr1 | PRAMEF5 | 13904198 | 28  |
| CHB | chr1 | PRAMEF5 | 13954198 | 32  |
| CHB | chr1 | PRAMEF5 | 14004198 | 70  |



## 3\_Introgression\_data

|     |      |         |          |    |
|-----|------|---------|----------|----|
| CHB | chr1 | PRAMEF5 | 14054198 | 89 |
| CHB | chr1 | PRAMEF5 | 14104198 | 80 |
| CHB | chr1 | PRAMEF5 | 14154198 | 73 |
| CHB | chr1 | PRAMEF5 | 14204198 | 61 |
| CHB | chr1 | PRAMEF5 | 14254198 | 41 |
| CHB | chr1 | PRAMEF5 | 14304198 | 25 |
| CHB | chr1 | PRAMEF5 | 14354198 | 35 |
| CHB | chr1 | PRAMEF5 | 14404198 | 88 |
| CHB | chr1 | PRAMEF5 | 14454198 | 88 |
| CHB | chr1 | PRAMEF5 | 14504198 | 40 |
| CHB | chr1 | PRAMEF5 | 14554198 | 36 |
| CHB | chr1 | PRAMEF5 | 14604198 | 26 |
| CHB | chr1 | PRAMEF5 | 14654198 | 6  |
| CHB | chr1 | PRAMEF5 | 14704198 | 0  |
| CHB | chr1 | PRAMEF5 | 14754198 | 0  |
| CHB | chr1 | PRAMEF5 | 14804198 | 0  |
| CHB | chr1 | PRAMEF5 | 14854198 | 0  |
| CHB | chr1 | PRAMEF5 | 14904198 | 0  |
| CHB | chr1 | PRAMEF5 | 14954198 | 0  |
| CHB | chr1 | PRAMEF5 | 15004198 | 0  |
| CHB | chr1 | PRAMEF5 | 15054198 | 0  |
| CHB | chr1 | PRAMEF5 | 15104198 | 0  |
| CHB | chr1 | PRAMEF5 | 15154198 | 0  |
| CHB | chr1 | PRAMEF5 | 15204198 | 0  |
| CHB | chr1 | PRAMEF5 | 15254198 | 0  |
| CHB | chr1 | PRAMEF5 | 15304198 | 0  |
| CHB | chr1 | PRAMEF5 | 15354198 | 45 |
| CHB | chr1 | PRAMEF5 | 15404198 | 63 |
| CHB | chr1 | PRAMEF5 | 15454198 | 32 |
| CHB | chr1 | PRAMEF5 | 15504198 | 28 |
| CHB | chr1 | PRAMEF5 | 15554198 | 17 |
| CHB | chr1 | PRAMEF5 | 15604198 | 3  |
| CHB | chr1 | PRAMEF5 | 15654198 | 0  |
| CHB | chr1 | PRAMEF5 | 15704198 | 0  |
| CHB | chr1 | PRAMEF5 | 15754198 | 0  |
| CHB | chr1 | PRAMEF5 | 15804198 | 0  |
| CHB | chr1 | PRAMEF5 | 15854198 | 0  |
| CHB | chr1 | PRAMEF5 | 15904198 | 0  |
| CHB | chr1 | PRAMEF5 | 15954198 | 0  |
| CHB | chr1 | PRAMEF5 | 16004198 | 0  |
| CHB | chr1 | PRAMEF5 | 16054198 | 26 |
| CHB | chr1 | PRAMEF5 | 16104198 | 43 |
| CHB | chr1 | PRAMEF5 | 16154198 | 46 |
| CHB | chr1 | PRAMEF5 | 16204198 | 46 |
| CHB | chr1 | PRAMEF5 | 16254198 | 25 |
| CHB | chr1 | PRAMEF5 | 16304198 | 35 |
| CHB | chr1 | PRAMEF5 | 16354198 | 44 |
| CHB | chr1 | PRAMEF5 | 16404198 | 17 |
| CHB | chr1 | PRAMEF5 | 16454198 | 0  |

## 3\_Introgression\_data

|     |      |         |          |    |
|-----|------|---------|----------|----|
| CHB | chr1 | PRAMEF5 | 16504198 | 0  |
| CHB | chr1 | PRAMEF5 | 16554198 | 3  |
| CHB | chr1 | PRAMEF5 | 16604198 | 18 |
| CHB | chr1 | PRAMEF5 | 16654198 | 31 |
| CHB | chr1 | PRAMEF5 | 16704198 | 43 |
| CHB | chr1 | PRAMEF5 | 16754198 | 60 |
| CHB | chr1 | PRAMEF5 | 16804198 | 51 |
| CHB | chr1 | PRAMEF5 | 16854198 | 18 |
| CHB | chr1 | PRAMEF5 | 16904198 | 0  |
| CHB | chr1 | PRAMEF5 | 16954198 | 0  |
| CHB | chr1 | PRAMEF5 | 17004198 | 0  |
| CHB | chr1 | PRAMEF5 | 17054198 | 0  |
| CHB | chr1 | PRAMEF5 | 17104198 | 0  |
| CHB | chr1 | PRAMEF5 | 17154198 | 0  |
| CHB | chr1 | PRAMEF5 | 17204198 | 0  |
| CHB | chr1 | PRAMEF5 | 17254198 | 0  |
| CHB | chr1 | PRAMEF5 | 17304198 | 0  |
| CHB | chr1 | PRAMEF5 | 17354198 | 0  |
| CHB | chr1 | PRAMEF5 | 17404198 | 0  |
| CHB | chr1 | PRAMEF5 | 17454198 | 0  |
| CHB | chr1 | PRAMEF5 | 17504198 | 0  |
| CHB | chr1 | PRAMEF5 | 17554198 | 0  |
| CHB | chr1 | PRAMEF5 | 17604198 | 0  |
| CHB | chr1 | PRAMEF5 | 17654198 | 0  |
| CHB | chr1 | PRAMEF5 | 17704198 | 0  |
| CHB | chr1 | PRAMEF5 | 17754198 | 0  |
| CHB | chr1 | PRAMEF5 | 17804198 | 0  |
| CHB | chr1 | PRAMEF5 | 17854198 | 0  |
| CHB | chr1 | PRAMEF5 | 17904198 | 0  |
| CHB | chr1 | PRAMEF5 | 17954198 | 0  |
| CHB | chr1 | PRAMEF5 | 18004198 | 0  |
| CHB | chr1 | PRAMEF5 | 18054198 | 0  |
| CHB | chr1 | PRAMEF5 | 18104198 | 0  |
| CHB | chr1 | PRAMEF5 | 18154198 | 0  |
| CHB | chr1 | PRAMEF5 | 18204198 | 0  |
| CHB | chr1 | PRAMEF8 | 8331223  | 0  |
| CHB | chr1 | PRAMEF8 | 8381223  | 0  |
| CHB | chr1 | PRAMEF8 | 8431223  | 0  |
| CHB | chr1 | PRAMEF8 | 8481223  | 0  |
| CHB | chr1 | PRAMEF8 | 8531223  | 0  |
| CHB | chr1 | PRAMEF8 | 8581223  | 0  |
| CHB | chr1 | PRAMEF8 | 8631223  | 0  |
| CHB | chr1 | PRAMEF8 | 8681223  | 0  |
| CHB | chr1 | PRAMEF8 | 8731223  | 0  |
| CHB | chr1 | PRAMEF8 | 8781223  | 0  |
| CHB | chr1 | PRAMEF8 | 8831223  | 0  |
| CHB | chr1 | PRAMEF8 | 8881223  | 0  |
| CHB | chr1 | PRAMEF8 | 8931223  | 0  |
| CHB | chr1 | PRAMEF8 | 8981223  | 0  |

## 3\_Introgression\_data

|     |      |         |          |    |
|-----|------|---------|----------|----|
| CHB | chr1 | PRAMEF8 | 9031223  | 0  |
| CHB | chr1 | PRAMEF8 | 9081223  | 0  |
| CHB | chr1 | PRAMEF8 | 9131223  | 0  |
| CHB | chr1 | PRAMEF8 | 9181223  | 0  |
| CHB | chr1 | PRAMEF8 | 9231223  | 0  |
| CHB | chr1 | PRAMEF8 | 9281223  | 0  |
| CHB | chr1 | PRAMEF8 | 9331223  | 0  |
| CHB | chr1 | PRAMEF8 | 9381223  | 0  |
| CHB | chr1 | PRAMEF8 | 9431223  | 5  |
| CHB | chr1 | PRAMEF8 | 9481223  | 37 |
| CHB | chr1 | PRAMEF8 | 9531223  | 45 |
| CHB | chr1 | PRAMEF8 | 9581223  | 37 |
| CHB | chr1 | PRAMEF8 | 9631223  | 40 |
| CHB | chr1 | PRAMEF8 | 9681223  | 48 |
| CHB | chr1 | PRAMEF8 | 9731223  | 67 |
| CHB | chr1 | PRAMEF8 | 9781223  | 95 |
| CHB | chr1 | PRAMEF8 | 9831223  | 95 |
| CHB | chr1 | PRAMEF8 | 9881223  | 36 |
| CHB | chr1 | PRAMEF8 | 9931223  | 1  |
| CHB | chr1 | PRAMEF8 | 9981223  | 0  |
| CHB | chr1 | PRAMEF8 | 10031223 | 0  |
| CHB | chr1 | PRAMEF8 | 10081223 | 0  |
| CHB | chr1 | PRAMEF8 | 10131223 | 0  |
| CHB | chr1 | PRAMEF8 | 10181223 | 0  |
| CHB | chr1 | PRAMEF8 | 10231223 | 0  |
| CHB | chr1 | PRAMEF8 | 10281223 | 0  |
| CHB | chr1 | PRAMEF8 | 10331223 | 0  |
| CHB | chr1 | PRAMEF8 | 10381223 | 0  |
| CHB | chr1 | PRAMEF8 | 10431223 | 0  |
| CHB | chr1 | PRAMEF8 | 10481223 | 0  |
| CHB | chr1 | PRAMEF8 | 10531223 | 0  |
| CHB | chr1 | PRAMEF8 | 10581223 | 0  |
| CHB | chr1 | PRAMEF8 | 10631223 | 0  |
| CHB | chr1 | PRAMEF8 | 10681223 | 0  |
| CHB | chr1 | PRAMEF8 | 10731223 | 16 |
| CHB | chr1 | PRAMEF8 | 10781223 | 32 |
| CHB | chr1 | PRAMEF8 | 10831223 | 35 |
| CHB | chr1 | PRAMEF8 | 10881223 | 19 |
| CHB | chr1 | PRAMEF8 | 10931223 | 0  |
| CHB | chr1 | PRAMEF8 | 10981223 | 0  |
| CHB | chr1 | PRAMEF8 | 11031223 | 0  |
| CHB | chr1 | PRAMEF8 | 11081223 | 0  |
| CHB | chr1 | PRAMEF8 | 11131223 | 0  |
| CHB | chr1 | PRAMEF8 | 11181223 | 0  |
| CHB | chr1 | PRAMEF8 | 11231223 | 0  |
| CHB | chr1 | PRAMEF8 | 11281223 | 3  |
| CHB | chr1 | PRAMEF8 | 11331223 | 19 |
| CHB | chr1 | PRAMEF8 | 11381223 | 49 |
| CHB | chr1 | PRAMEF8 | 11431223 | 43 |

## 3\_Introgression\_data

|     |      |         |          |     |
|-----|------|---------|----------|-----|
| CHB | chr1 | PRAMEF8 | 11481223 | 19  |
| CHB | chr1 | PRAMEF8 | 11531223 | 26  |
| CHB | chr1 | PRAMEF8 | 11581223 | 42  |
| CHB | chr1 | PRAMEF8 | 11631223 | 27  |
| CHB | chr1 | PRAMEF8 | 11681223 | 2   |
| CHB | chr1 | PRAMEF8 | 11731223 | 0   |
| CHB | chr1 | PRAMEF8 | 11781223 | 0   |
| CHB | chr1 | PRAMEF8 | 11831223 | 0   |
| CHB | chr1 | PRAMEF8 | 11881223 | 15  |
| CHB | chr1 | PRAMEF8 | 11931223 | 46  |
| CHB | chr1 | PRAMEF8 | 11981223 | 54  |
| CHB | chr1 | PRAMEF8 | 12031223 | 53  |
| CHB | chr1 | PRAMEF8 | 12081223 | 93  |
| CHB | chr1 | PRAMEF8 | 12131223 | 89  |
| CHB | chr1 | PRAMEF8 | 12181223 | 26  |
| CHB | chr1 | PRAMEF8 | 12231223 | 5   |
| CHB | chr1 | PRAMEF8 | 12281223 | 25  |
| CHB | chr1 | PRAMEF8 | 12331223 | 41  |
| CHB | chr1 | PRAMEF8 | 12381223 | 41  |
| CHB | chr1 | PRAMEF8 | 12431223 | 37  |
| CHB | chr1 | PRAMEF8 | 12481223 | 27  |
| CHB | chr1 | PRAMEF8 | 12531223 | 41  |
| CHB | chr1 | PRAMEF8 | 12581223 | 37  |
| CHB | chr1 | PRAMEF8 | 12631223 | 6   |
| CHB | chr1 | PRAMEF8 | 12681223 | 0   |
| CHB | chr1 | PRAMEF8 | 12731223 | 4   |
| CHB | chr1 | PRAMEF8 | 12781223 | 19  |
| CHB | chr1 | PRAMEF8 | 12831223 | 114 |
| CHB | chr1 | PRAMEF8 | 12881223 | 101 |
| CHB | chr1 | PRAMEF8 | 12931223 | 2   |
| CHB | chr1 | PRAMEF8 | 12981223 | 0   |
| CHB | chr1 | PRAMEF8 | 13031223 | 0   |
| CHB | chr1 | PRAMEF8 | 13081223 | 0   |
| CHB | chr1 | PRAMEF8 | 13131223 | 0   |
| CHB | chr1 | PRAMEF8 | 13181223 | 0   |
| CHB | chr1 | PRAMEF8 | 13231223 | 0   |
| CHB | chr1 | PRAMEF8 | 13281223 | 0   |
| CHB | chr1 | PRAMEF8 | 13331223 | 0   |
| CHB | chr1 | PRAMEF8 | 13381223 | 0   |
| CHB | chr1 | PRAMEF8 | 13431223 | 0   |
| CHB | chr1 | PRAMEF8 | 13481223 | 0   |
| CHB | chr1 | PRAMEF8 | 13531223 | 0   |
| CHB | chr1 | PRAMEF8 | 13581223 | 0   |
| CHB | chr1 | PRAMEF8 | 13631223 | 0   |
| CHB | chr1 | PRAMEF8 | 13681223 | 0   |
| CHB | chr1 | PRAMEF8 | 13731223 | 0   |
| CHB | chr1 | PRAMEF8 | 13781223 | 8   |
| CHB | chr1 | PRAMEF8 | 13831223 | 41  |
| CHB | chr1 | PRAMEF8 | 13881223 | 43  |

## 3\_Introgression\_data

|     |      |         |          |    |
|-----|------|---------|----------|----|
| CHB | chr1 | PRAMEF8 | 13931223 | 19 |
| CHB | chr1 | PRAMEF8 | 13981223 | 47 |
| CHB | chr1 | PRAMEF8 | 14031223 | 85 |
| CHB | chr1 | PRAMEF8 | 14081223 | 86 |
| CHB | chr1 | PRAMEF8 | 14131223 | 76 |
| CHB | chr1 | PRAMEF8 | 14181223 | 74 |
| CHB | chr1 | PRAMEF8 | 14231223 | 55 |
| CHB | chr1 | PRAMEF8 | 14281223 | 28 |
| CHB | chr1 | PRAMEF8 | 14331223 | 24 |
| CHB | chr1 | PRAMEF8 | 14381223 | 83 |
| CHB | chr1 | PRAMEF8 | 14431223 | 89 |
| CHB | chr1 | PRAMEF8 | 14481223 | 45 |
| CHB | chr1 | PRAMEF8 | 14531223 | 41 |
| CHB | chr1 | PRAMEF8 | 14581223 | 29 |
| CHB | chr1 | PRAMEF8 | 14631223 | 13 |
| CHB | chr1 | PRAMEF8 | 14681223 | 0  |
| CHB | chr1 | PRAMEF8 | 14731223 | 0  |
| CHB | chr1 | PRAMEF8 | 14781223 | 0  |
| CHB | chr1 | PRAMEF8 | 14831223 | 0  |
| CHB | chr1 | PRAMEF8 | 14881223 | 0  |
| CHB | chr1 | PRAMEF8 | 14931223 | 0  |
| CHB | chr1 | PRAMEF8 | 14981223 | 0  |
| CHB | chr1 | PRAMEF8 | 15031223 | 0  |
| CHB | chr1 | PRAMEF8 | 15081223 | 0  |
| CHB | chr1 | PRAMEF8 | 15131223 | 0  |
| CHB | chr1 | PRAMEF8 | 15181223 | 0  |
| CHB | chr1 | PRAMEF8 | 15231223 | 0  |
| CHB | chr1 | PRAMEF8 | 15281223 | 0  |
| CHB | chr1 | PRAMEF8 | 15331223 | 21 |
| CHB | chr1 | PRAMEF8 | 15381223 | 58 |
| CHB | chr1 | PRAMEF8 | 15431223 | 48 |
| CHB | chr1 | PRAMEF8 | 15481223 | 25 |
| CHB | chr1 | PRAMEF8 | 15531223 | 25 |
| CHB | chr1 | PRAMEF8 | 15581223 | 11 |
| CHB | chr1 | PRAMEF8 | 15631223 | 0  |
| CHB | chr1 | PRAMEF8 | 15681223 | 0  |
| CHB | chr1 | PRAMEF8 | 15731223 | 0  |
| CHB | chr1 | PRAMEF8 | 15781223 | 0  |
| CHB | chr1 | PRAMEF8 | 15831223 | 0  |
| CHB | chr1 | PRAMEF8 | 15881223 | 0  |
| CHB | chr1 | PRAMEF8 | 15931223 | 0  |
| CHB | chr1 | PRAMEF8 | 15981223 | 0  |
| CHB | chr1 | PRAMEF8 | 16031223 | 7  |
| CHB | chr1 | PRAMEF8 | 16081223 | 35 |
| CHB | chr1 | PRAMEF8 | 16131223 | 51 |
| CHB | chr1 | PRAMEF8 | 16181223 | 46 |
| CHB | chr1 | PRAMEF8 | 16231223 | 34 |
| CHB | chr1 | PRAMEF8 | 16281223 | 32 |
| CHB | chr1 | PRAMEF8 | 16331223 | 43 |

## 3\_Introgression\_data

|     |       |         |          |    |
|-----|-------|---------|----------|----|
| CHB | chr1  | PRAMEF8 | 16381223 | 28 |
| CHB | chr1  | PRAMEF8 | 16431223 | 6  |
| CHB | chr1  | PRAMEF8 | 16481223 | 0  |
| CHB | chr1  | PRAMEF8 | 16531223 | 0  |
| CHB | chr1  | PRAMEF8 | 16581223 | 11 |
| CHB | chr1  | PRAMEF8 | 16631223 | 24 |
| CHB | chr1  | PRAMEF8 | 16681223 | 41 |
| CHB | chr1  | PRAMEF8 | 16731223 | 51 |
| CHB | chr1  | PRAMEF8 | 16781223 | 60 |
| CHB | chr1  | PRAMEF8 | 16831223 | 37 |
| CHB | chr1  | PRAMEF8 | 16881223 | 0  |
| CHB | chr1  | PRAMEF8 | 16931223 | 0  |
| CHB | chr1  | PRAMEF8 | 16981223 | 0  |
| CHB | chr1  | PRAMEF8 | 17031223 | 0  |
| CHB | chr1  | PRAMEF8 | 17081223 | 0  |
| CHB | chr1  | PRAMEF8 | 17131223 | 0  |
| CHB | chr1  | PRAMEF8 | 17181223 | 0  |
| CHB | chr1  | PRAMEF8 | 17231223 | 0  |
| CHB | chr1  | PRAMEF8 | 17281223 | 0  |
| CHB | chr1  | PRAMEF8 | 17331223 | 0  |
| CHB | chr1  | PRAMEF8 | 17381223 | 0  |
| CHB | chr1  | PRAMEF8 | 17431223 | 0  |
| CHB | chr1  | PRAMEF8 | 17481223 | 0  |
| CHB | chr1  | PRAMEF8 | 17531223 | 0  |
| CHB | chr1  | PRAMEF8 | 17581223 | 0  |
| CHB | chr1  | PRAMEF8 | 17631223 | 0  |
| CHB | chr1  | PRAMEF8 | 17681223 | 0  |
| CHB | chr1  | PRAMEF8 | 17731223 | 0  |
| CHB | chr1  | PRAMEF8 | 17781223 | 0  |
| CHB | chr1  | PRAMEF8 | 17831223 | 0  |
| CHB | chr1  | PRAMEF8 | 17881223 | 0  |
| CHB | chr1  | PRAMEF8 | 17931223 | 0  |
| CHB | chr1  | PRAMEF8 | 17981223 | 0  |
| CHB | chr1  | PRAMEF8 | 18031223 | 0  |
| CHB | chr1  | PRAMEF8 | 18081223 | 0  |
| CHB | chr1  | PRAMEF8 | 18131223 | 0  |
| CHB | chr1  | PRAMEF8 | 18181223 | 0  |
| CHB | chr1  | PRAMEF8 | 18231223 | 0  |
| CHB | chr17 | PRR11   | 54205355 | 0  |
| CHB | chr17 | PRR11   | 54255355 | 0  |
| CHB | chr17 | PRR11   | 54305355 | 0  |
| CHB | chr17 | PRR11   | 54355355 | 0  |
| CHB | chr17 | PRR11   | 54405355 | 0  |
| CHB | chr17 | PRR11   | 54455355 | 0  |
| CHB | chr17 | PRR11   | 54505355 | 0  |
| CHB | chr17 | PRR11   | 54555355 | 0  |
| CHB | chr17 | PRR11   | 54605355 | 0  |
| CHB | chr17 | PRR11   | 54655355 | 0  |
| CHB | chr17 | PRR11   | 54705355 | 0  |

## 3\_Introgression\_data

|     |       |       |          |   |
|-----|-------|-------|----------|---|
| CHB | chr17 | PRR11 | 54755355 | 0 |
| CHB | chr17 | PRR11 | 54805355 | 0 |
| CHB | chr17 | PRR11 | 54855355 | 0 |
| CHB | chr17 | PRR11 | 54905355 | 0 |
| CHB | chr17 | PRR11 | 54955355 | 0 |
| CHB | chr17 | PRR11 | 55005355 | 0 |
| CHB | chr17 | PRR11 | 55055355 | 0 |
| CHB | chr17 | PRR11 | 55105355 | 0 |
| CHB | chr17 | PRR11 | 55155355 | 0 |
| CHB | chr17 | PRR11 | 55205355 | 0 |
| CHB | chr17 | PRR11 | 55255355 | 0 |
| CHB | chr17 | PRR11 | 55305355 | 0 |
| CHB | chr17 | PRR11 | 55355355 | 0 |
| CHB | chr17 | PRR11 | 55405355 | 0 |
| CHB | chr17 | PRR11 | 55455355 | 0 |
| CHB | chr17 | PRR11 | 55505355 | 0 |
| CHB | chr17 | PRR11 | 55555355 | 0 |
| CHB | chr17 | PRR11 | 55605355 | 0 |
| CHB | chr17 | PRR11 | 55655355 | 0 |
| CHB | chr17 | PRR11 | 55705355 | 0 |
| CHB | chr17 | PRR11 | 55755355 | 0 |
| CHB | chr17 | PRR11 | 55805355 | 0 |
| CHB | chr17 | PRR11 | 55855355 | 0 |
| CHB | chr17 | PRR11 | 55905355 | 0 |
| CHB | chr17 | PRR11 | 55955355 | 0 |
| CHB | chr17 | PRR11 | 56005355 | 0 |
| CHB | chr17 | PRR11 | 56055355 | 0 |
| CHB | chr17 | PRR11 | 56105355 | 0 |
| CHB | chr17 | PRR11 | 56155355 | 0 |
| CHB | chr17 | PRR11 | 56205355 | 0 |
| CHB | chr17 | PRR11 | 56255355 | 0 |
| CHB | chr17 | PRR11 | 56305355 | 0 |
| CHB | chr17 | PRR11 | 56355355 | 0 |
| CHB | chr17 | PRR11 | 56405355 | 0 |
| CHB | chr17 | PRR11 | 56455355 | 0 |
| CHB | chr17 | PRR11 | 56505355 | 0 |
| CHB | chr17 | PRR11 | 56555355 | 0 |
| CHB | chr17 | PRR11 | 56605355 | 0 |
| CHB | chr17 | PRR11 | 56655355 | 0 |
| CHB | chr17 | PRR11 | 56705355 | 0 |
| CHB | chr17 | PRR11 | 56755355 | 0 |
| CHB | chr17 | PRR11 | 56805355 | 0 |
| CHB | chr17 | PRR11 | 56855355 | 0 |
| CHB | chr17 | PRR11 | 56905355 | 0 |
| CHB | chr17 | PRR11 | 56955355 | 0 |
| CHB | chr17 | PRR11 | 57005355 | 0 |
| CHB | chr17 | PRR11 | 57055355 | 0 |
| CHB | chr17 | PRR11 | 57105355 | 0 |
| CHB | chr17 | PRR11 | 57155355 | 0 |

## 3\_Introgression\_data

|     |       |       |          |   |
|-----|-------|-------|----------|---|
| CHB | chr17 | PRR11 | 57205355 | 0 |
| CHB | chr17 | PRR11 | 57255355 | 0 |
| CHB | chr17 | PRR11 | 57305355 | 0 |
| CHB | chr17 | PRR11 | 57355355 | 0 |
| CHB | chr17 | PRR11 | 57405355 | 0 |
| CHB | chr17 | PRR11 | 57455355 | 0 |
| CHB | chr17 | PRR11 | 57505355 | 0 |
| CHB | chr17 | PRR11 | 57555355 | 0 |
| CHB | chr17 | PRR11 | 57605355 | 0 |
| CHB | chr17 | PRR11 | 57655355 | 0 |
| CHB | chr17 | PRR11 | 57705355 | 0 |
| CHB | chr17 | PRR11 | 57755355 | 0 |
| CHB | chr17 | PRR11 | 57805355 | 0 |
| CHB | chr17 | PRR11 | 57855355 | 0 |
| CHB | chr17 | PRR11 | 57905355 | 0 |
| CHB | chr17 | PRR11 | 57955355 | 0 |
| CHB | chr17 | PRR11 | 58005355 | 0 |
| CHB | chr17 | PRR11 | 58055355 | 0 |
| CHB | chr17 | PRR11 | 58105355 | 0 |
| CHB | chr17 | PRR11 | 58155355 | 0 |
| CHB | chr17 | PRR11 | 58205355 | 0 |
| CHB | chr17 | PRR11 | 58255355 | 0 |
| CHB | chr17 | PRR11 | 58305355 | 0 |
| CHB | chr17 | PRR11 | 58355355 | 0 |
| CHB | chr17 | PRR11 | 58405355 | 0 |
| CHB | chr17 | PRR11 | 58455355 | 0 |
| CHB | chr17 | PRR11 | 58505355 | 0 |
| CHB | chr17 | PRR11 | 58555355 | 0 |
| CHB | chr17 | PRR11 | 58605355 | 0 |
| CHB | chr17 | PRR11 | 58655355 | 0 |
| CHB | chr17 | PRR11 | 58705355 | 0 |
| CHB | chr17 | PRR11 | 58755355 | 0 |
| CHB | chr17 | PRR11 | 58805355 | 0 |
| CHB | chr17 | PRR11 | 58855355 | 0 |
| CHB | chr17 | PRR11 | 58905355 | 0 |
| CHB | chr17 | PRR11 | 58955355 | 0 |
| CHB | chr17 | PRR11 | 59005355 | 0 |
| CHB | chr17 | PRR11 | 59055355 | 0 |
| CHB | chr17 | PRR11 | 59105355 | 0 |
| CHB | chr17 | PRR11 | 59155355 | 0 |
| CHB | chr17 | PRR11 | 59205355 | 0 |
| CHB | chr17 | PRR11 | 59255355 | 0 |
| CHB | chr17 | PRR11 | 59305355 | 0 |
| CHB | chr17 | PRR11 | 59355355 | 0 |
| CHB | chr17 | PRR11 | 59405355 | 0 |
| CHB | chr17 | PRR11 | 59455355 | 0 |
| CHB | chr17 | PRR11 | 59505355 | 0 |
| CHB | chr17 | PRR11 | 59555355 | 0 |
| CHB | chr17 | PRR11 | 59605355 | 0 |



## 3\_Introgression\_data

|     |       |       |          |   |
|-----|-------|-------|----------|---|
| CHB | chr17 | PRR11 | 59655355 | 0 |
| CHB | chr17 | PRR11 | 59705355 | 0 |
| CHB | chr17 | PRR11 | 59755355 | 0 |
| CHB | chr17 | PRR11 | 59805355 | 0 |
| CHB | chr17 | PRR11 | 59855355 | 0 |
| CHB | chr17 | PRR11 | 59905355 | 0 |
| CHB | chr17 | PRR11 | 59955355 | 0 |
| CHB | chr17 | PRR11 | 60005355 | 0 |
| CHB | chr17 | PRR11 | 60055355 | 0 |
| CHB | chr17 | PRR11 | 60105355 | 0 |
| CHB | chr17 | PRR11 | 60155355 | 0 |
| CHB | chr17 | PRR11 | 60205355 | 0 |
| CHB | chr17 | PRR11 | 60255355 | 0 |
| CHB | chr17 | PRR11 | 60305355 | 0 |
| CHB | chr17 | PRR11 | 60355355 | 0 |
| CHB | chr17 | PRR11 | 60405355 | 0 |
| CHB | chr17 | PRR11 | 60455355 | 0 |
| CHB | chr17 | PRR11 | 60505355 | 0 |
| CHB | chr17 | PRR11 | 60555355 | 0 |
| CHB | chr17 | PRR11 | 60605355 | 0 |
| CHB | chr17 | PRR11 | 60655355 | 0 |
| CHB | chr17 | PRR11 | 60705355 | 0 |
| CHB | chr17 | PRR11 | 60755355 | 0 |
| CHB | chr17 | PRR11 | 60805355 | 0 |
| CHB | chr17 | PRR11 | 60855355 | 0 |
| CHB | chr17 | PRR11 | 60905355 | 0 |
| CHB | chr17 | PRR11 | 60955355 | 0 |
| CHB | chr17 | PRR11 | 61005355 | 0 |
| CHB | chr17 | PRR11 | 61055355 | 0 |
| CHB | chr17 | PRR11 | 61105355 | 0 |
| CHB | chr17 | PRR11 | 61155355 | 0 |
| CHB | chr17 | PRR11 | 61205355 | 0 |
| CHB | chr17 | PRR11 | 61255355 | 0 |
| CHB | chr17 | PRR11 | 61305355 | 0 |
| CHB | chr17 | PRR11 | 61355355 | 0 |
| CHB | chr17 | PRR11 | 61405355 | 0 |
| CHB | chr17 | PRR11 | 61455355 | 0 |
| CHB | chr17 | PRR11 | 61505355 | 0 |
| CHB | chr17 | PRR11 | 61555355 | 0 |
| CHB | chr17 | PRR11 | 61605355 | 0 |
| CHB | chr17 | PRR11 | 61655355 | 0 |
| CHB | chr17 | PRR11 | 61705355 | 0 |
| CHB | chr17 | PRR11 | 61755355 | 0 |
| CHB | chr17 | PRR11 | 61805355 | 0 |
| CHB | chr17 | PRR11 | 61855355 | 0 |
| CHB | chr17 | PRR11 | 61905355 | 0 |
| CHB | chr17 | PRR11 | 61955355 | 0 |
| CHB | chr17 | PRR11 | 62005355 | 0 |
| CHB | chr17 | PRR11 | 62055355 | 0 |

## 3\_Introgression\_data

|     |       |        |          |   |
|-----|-------|--------|----------|---|
| CHB | chr17 | PRR11  | 62105355 | 0 |
| CHB | chr17 | PRR11  | 62155355 | 0 |
| CHB | chr17 | PRR11  | 62205355 | 0 |
| CHB | chr17 | PRR11  | 62255355 | 0 |
| CHB | chr17 | PRR11  | 62305355 | 0 |
| CHB | chr17 | PRR11  | 62355355 | 0 |
| CHB | chr17 | PRR11  | 62405355 | 0 |
| CHB | chr17 | PRR11  | 62455355 | 0 |
| CHB | chr17 | PRR11  | 62505355 | 0 |
| CHB | chr17 | PRR11  | 62555355 | 0 |
| CHB | chr17 | PRR11  | 62605355 | 0 |
| CHB | chr17 | PRR11  | 62655355 | 0 |
| CHB | chr17 | PRR11  | 62705355 | 0 |
| CHB | chr17 | PRR11  | 62755355 | 0 |
| CHB | chr17 | PRR11  | 62805355 | 0 |
| CHB | chr17 | PRR11  | 62855355 | 0 |
| CHB | chr17 | PRR11  | 62905355 | 0 |
| CHB | chr17 | PRR11  | 62955355 | 0 |
| CHB | chr17 | PRR11  | 63005355 | 0 |
| CHB | chr17 | PRR11  | 63055355 | 0 |
| CHB | chr17 | PRR11  | 63105355 | 0 |
| CHB | chr17 | PRR11  | 63155355 | 0 |
| CHB | chr17 | PRR11  | 63205355 | 0 |
| CHB | chr17 | PRR11  | 63255355 | 0 |
| CHB | chr17 | PRR11  | 63305355 | 0 |
| CHB | chr17 | PRR11  | 63355355 | 0 |
| CHB | chr17 | PRR11  | 63405355 | 0 |
| CHB | chr17 | PRR11  | 63455355 | 0 |
| CHB | chr17 | PRR11  | 63505355 | 0 |
| CHB | chr17 | PRR11  | 63555355 | 0 |
| CHB | chr17 | PRR11  | 63605355 | 0 |
| CHB | chr17 | PRR11  | 63655355 | 0 |
| CHB | chr17 | PRR11  | 63705355 | 0 |
| CHB | chr17 | PRR11  | 63755355 | 0 |
| CHB | chr17 | PRR11  | 63805355 | 0 |
| CHB | chr17 | PRR11  | 63855355 | 0 |
| CHB | chr17 | PRR11  | 63905355 | 0 |
| CHB | chr17 | PRR11  | 63955355 | 0 |
| CHB | chr17 | PRR11  | 64005355 | 0 |
| CHB | chr17 | PRR11  | 64055355 | 0 |
| CHB | chr17 | PRR11  | 64105355 | 0 |
| CHB | chr17 | PRR11  | 64155355 | 0 |
| CHB | chr13 | PRR20A | 52190918 | 0 |
| CHB | chr13 | PRR20A | 52240918 | 0 |
| CHB | chr13 | PRR20A | 52290918 | 0 |
| CHB | chr13 | PRR20A | 52340918 | 0 |
| CHB | chr13 | PRR20A | 52390918 | 0 |
| CHB | chr13 | PRR20A | 52440918 | 0 |
| CHB | chr13 | PRR20A | 52490918 | 0 |

## 3\_Introgression\_data

|     |       |        |          |   |
|-----|-------|--------|----------|---|
| CHB | chr13 | PRR20A | 52540918 | 0 |
| CHB | chr13 | PRR20A | 52590918 | 0 |
| CHB | chr13 | PRR20A | 52640918 | 0 |
| CHB | chr13 | PRR20A | 52690918 | 0 |
| CHB | chr13 | PRR20A | 52740918 | 0 |
| CHB | chr13 | PRR20A | 52790918 | 0 |
| CHB | chr13 | PRR20A | 52840918 | 0 |
| CHB | chr13 | PRR20A | 52890918 | 0 |
| CHB | chr13 | PRR20A | 52940918 | 0 |
| CHB | chr13 | PRR20A | 52990918 | 0 |
| CHB | chr13 | PRR20A | 53040918 | 0 |
| CHB | chr13 | PRR20A | 53090918 | 0 |
| CHB | chr13 | PRR20A | 53140918 | 0 |
| CHB | chr13 | PRR20A | 53190918 | 0 |
| CHB | chr13 | PRR20A | 53240918 | 0 |
| CHB | chr13 | PRR20A | 53290918 | 0 |
| CHB | chr13 | PRR20A | 53340918 | 0 |
| CHB | chr13 | PRR20A | 53390918 | 0 |
| CHB | chr13 | PRR20A | 53440918 | 0 |
| CHB | chr13 | PRR20A | 53490918 | 0 |
| CHB | chr13 | PRR20A | 53540918 | 0 |
| CHB | chr13 | PRR20A | 53590918 | 0 |
| CHB | chr13 | PRR20A | 53640918 | 0 |
| CHB | chr13 | PRR20A | 53690918 | 0 |
| CHB | chr13 | PRR20A | 53740918 | 0 |
| CHB | chr13 | PRR20A | 53790918 | 0 |
| CHB | chr13 | PRR20A | 53840918 | 0 |
| CHB | chr13 | PRR20A | 53890918 | 0 |
| CHB | chr13 | PRR20A | 53940918 | 0 |
| CHB | chr13 | PRR20A | 53990918 | 0 |
| CHB | chr13 | PRR20A | 54040918 | 0 |
| CHB | chr13 | PRR20A | 54090918 | 0 |
| CHB | chr13 | PRR20A | 54140918 | 0 |
| CHB | chr13 | PRR20A | 54190918 | 0 |
| CHB | chr13 | PRR20A | 54240918 | 0 |
| CHB | chr13 | PRR20A | 54290918 | 0 |
| CHB | chr13 | PRR20A | 54340918 | 0 |
| CHB | chr13 | PRR20A | 54390918 | 0 |
| CHB | chr13 | PRR20A | 54440918 | 0 |
| CHB | chr13 | PRR20A | 54490918 | 0 |
| CHB | chr13 | PRR20A | 54540918 | 0 |
| CHB | chr13 | PRR20A | 54590918 | 0 |
| CHB | chr13 | PRR20A | 54640918 | 0 |
| CHB | chr13 | PRR20A | 54690918 | 0 |
| CHB | chr13 | PRR20A | 54740918 | 0 |
| CHB | chr13 | PRR20A | 54790918 | 0 |
| CHB | chr13 | PRR20A | 54840918 | 0 |
| CHB | chr13 | PRR20A | 54890918 | 0 |
| CHB | chr13 | PRR20A | 54940918 | 0 |

## 3\_Introgression\_data

|     |       |        |          |   |
|-----|-------|--------|----------|---|
| CHB | chr13 | PRR20A | 54990918 | 0 |
| CHB | chr13 | PRR20A | 55040918 | 0 |
| CHB | chr13 | PRR20A | 55090918 | 0 |
| CHB | chr13 | PRR20A | 55140918 | 0 |
| CHB | chr13 | PRR20A | 55190918 | 0 |
| CHB | chr13 | PRR20A | 55240918 | 0 |
| CHB | chr13 | PRR20A | 55290918 | 0 |
| CHB | chr13 | PRR20A | 55340918 | 0 |
| CHB | chr13 | PRR20A | 55390918 | 0 |
| CHB | chr13 | PRR20A | 55440918 | 0 |
| CHB | chr13 | PRR20A | 55490918 | 0 |
| CHB | chr13 | PRR20A | 55540918 | 0 |
| CHB | chr13 | PRR20A | 55590918 | 0 |
| CHB | chr13 | PRR20A | 55640918 | 0 |
| CHB | chr13 | PRR20A | 55690918 | 0 |
| CHB | chr13 | PRR20A | 55740918 | 0 |
| CHB | chr13 | PRR20A | 55790918 | 0 |
| CHB | chr13 | PRR20A | 55840918 | 0 |
| CHB | chr13 | PRR20A | 55890918 | 0 |
| CHB | chr13 | PRR20A | 55940918 | 0 |
| CHB | chr13 | PRR20A | 55990918 | 0 |
| CHB | chr13 | PRR20A | 56040918 | 0 |
| CHB | chr13 | PRR20A | 56090918 | 0 |
| CHB | chr13 | PRR20A | 56140918 | 0 |
| CHB | chr13 | PRR20A | 56190918 | 0 |
| CHB | chr13 | PRR20A | 56240918 | 0 |
| CHB | chr13 | PRR20A | 56290918 | 0 |
| CHB | chr13 | PRR20A | 56340918 | 0 |
| CHB | chr13 | PRR20A | 56390918 | 0 |
| CHB | chr13 | PRR20A | 56440918 | 0 |
| CHB | chr13 | PRR20A | 56490918 | 0 |
| CHB | chr13 | PRR20A | 56540918 | 0 |
| CHB | chr13 | PRR20A | 56590918 | 0 |
| CHB | chr13 | PRR20A | 56640918 | 0 |
| CHB | chr13 | PRR20A | 56690918 | 0 |
| CHB | chr13 | PRR20A | 56740918 | 0 |
| CHB | chr13 | PRR20A | 56790918 | 0 |
| CHB | chr13 | PRR20A | 56840918 | 0 |
| CHB | chr13 | PRR20A | 56890918 | 0 |
| CHB | chr13 | PRR20A | 56940918 | 0 |
| CHB | chr13 | PRR20A | 56990918 | 0 |
| CHB | chr13 | PRR20A | 57040918 | 0 |
| CHB | chr13 | PRR20A | 57090918 | 0 |
| CHB | chr13 | PRR20A | 57140918 | 0 |
| CHB | chr13 | PRR20A | 57190918 | 0 |
| CHB | chr13 | PRR20A | 57240918 | 0 |
| CHB | chr13 | PRR20A | 57290918 | 0 |
| CHB | chr13 | PRR20A | 57340918 | 0 |
| CHB | chr13 | PRR20A | 57390918 | 0 |

## 3\_Introgression\_data

|     |       |        |          |   |
|-----|-------|--------|----------|---|
| CHB | chr13 | PRR20A | 57440918 | 0 |
| CHB | chr13 | PRR20A | 57490918 | 0 |
| CHB | chr13 | PRR20A | 57540918 | 0 |
| CHB | chr13 | PRR20A | 57590918 | 0 |
| CHB | chr13 | PRR20A | 57640918 | 0 |
| CHB | chr13 | PRR20A | 57690918 | 0 |
| CHB | chr13 | PRR20A | 57740918 | 0 |
| CHB | chr13 | PRR20A | 57790918 | 0 |
| CHB | chr13 | PRR20A | 57840918 | 0 |
| CHB | chr13 | PRR20A | 57890918 | 0 |
| CHB | chr13 | PRR20A | 57940918 | 0 |
| CHB | chr13 | PRR20A | 57990918 | 0 |
| CHB | chr13 | PRR20A | 58040918 | 0 |
| CHB | chr13 | PRR20A | 58090918 | 0 |
| CHB | chr13 | PRR20A | 58140918 | 0 |
| CHB | chr13 | PRR20A | 58190918 | 0 |
| CHB | chr13 | PRR20A | 58240918 | 0 |
| CHB | chr13 | PRR20A | 58290918 | 0 |
| CHB | chr13 | PRR20A | 58340918 | 0 |
| CHB | chr13 | PRR20A | 58390918 | 0 |
| CHB | chr13 | PRR20A | 58440918 | 0 |
| CHB | chr13 | PRR20A | 58490918 | 0 |
| CHB | chr13 | PRR20A | 58540918 | 0 |
| CHB | chr13 | PRR20A | 58590918 | 0 |
| CHB | chr13 | PRR20A | 58640918 | 0 |
| CHB | chr13 | PRR20A | 58690918 | 0 |
| CHB | chr13 | PRR20A | 58740918 | 0 |
| CHB | chr13 | PRR20A | 58790918 | 0 |
| CHB | chr13 | PRR20A | 58840918 | 0 |
| CHB | chr13 | PRR20A | 58890918 | 0 |
| CHB | chr13 | PRR20A | 58940918 | 0 |
| CHB | chr13 | PRR20A | 58990918 | 0 |
| CHB | chr13 | PRR20A | 59040918 | 0 |
| CHB | chr13 | PRR20A | 59090918 | 0 |
| CHB | chr13 | PRR20A | 59140918 | 0 |
| CHB | chr13 | PRR20A | 59190918 | 0 |
| CHB | chr13 | PRR20A | 59240918 | 0 |
| CHB | chr13 | PRR20A | 59290918 | 0 |
| CHB | chr13 | PRR20A | 59340918 | 0 |
| CHB | chr13 | PRR20A | 59390918 | 0 |
| CHB | chr13 | PRR20A | 59440918 | 0 |
| CHB | chr13 | PRR20A | 59490918 | 0 |
| CHB | chr13 | PRR20A | 59540918 | 0 |
| CHB | chr13 | PRR20A | 59590918 | 0 |
| CHB | chr13 | PRR20A | 59640918 | 0 |
| CHB | chr13 | PRR20A | 59690918 | 0 |
| CHB | chr13 | PRR20A | 59740918 | 0 |
| CHB | chr13 | PRR20A | 59790918 | 0 |
| CHB | chr13 | PRR20A | 59840918 | 0 |

## 3\_Introgression\_data

|     |       |        |          |    |
|-----|-------|--------|----------|----|
| CHB | chr13 | PRR20A | 59890918 | 0  |
| CHB | chr13 | PRR20A | 59940918 | 0  |
| CHB | chr13 | PRR20A | 59990918 | 0  |
| CHB | chr13 | PRR20A | 60040918 | 0  |
| CHB | chr13 | PRR20A | 60090918 | 0  |
| CHB | chr13 | PRR20A | 60140918 | 0  |
| CHB | chr13 | PRR20A | 60190918 | 0  |
| CHB | chr13 | PRR20A | 60240918 | 0  |
| CHB | chr13 | PRR20A | 60290918 | 0  |
| CHB | chr13 | PRR20A | 60340918 | 0  |
| CHB | chr13 | PRR20A | 60390918 | 0  |
| CHB | chr13 | PRR20A | 60440918 | 0  |
| CHB | chr13 | PRR20A | 60490918 | 0  |
| CHB | chr13 | PRR20A | 60540918 | 0  |
| CHB | chr13 | PRR20A | 60590918 | 0  |
| CHB | chr13 | PRR20A | 60640918 | 0  |
| CHB | chr13 | PRR20A | 60690918 | 0  |
| CHB | chr13 | PRR20A | 60740918 | 0  |
| CHB | chr13 | PRR20A | 60790918 | 0  |
| CHB | chr13 | PRR20A | 60840918 | 0  |
| CHB | chr13 | PRR20A | 60890918 | 0  |
| CHB | chr13 | PRR20A | 60940918 | 0  |
| CHB | chr13 | PRR20A | 60990918 | 0  |
| CHB | chr13 | PRR20A | 61040918 | 0  |
| CHB | chr13 | PRR20A | 61090918 | 0  |
| CHB | chr13 | PRR20A | 61140918 | 0  |
| CHB | chr13 | PRR20A | 61190918 | 0  |
| CHB | chr13 | PRR20A | 61240918 | 0  |
| CHB | chr13 | PRR20A | 61290918 | 0  |
| CHB | chr13 | PRR20A | 61340918 | 0  |
| CHB | chr13 | PRR20A | 61390918 | 0  |
| CHB | chr13 | PRR20A | 61440918 | 0  |
| CHB | chr13 | PRR20A | 61490918 | 0  |
| CHB | chr13 | PRR20A | 61540918 | 0  |
| CHB | chr13 | PRR20A | 61590918 | 0  |
| CHB | chr13 | PRR20A | 61640918 | 0  |
| CHB | chr13 | PRR20A | 61690918 | 0  |
| CHB | chr13 | PRR20A | 61740918 | 0  |
| CHB | chr13 | PRR20A | 61790918 | 0  |
| CHB | chr13 | PRR20A | 61840918 | 0  |
| CHB | chr13 | PRR20A | 61890918 | 0  |
| CHB | chr13 | PRR20A | 61940918 | 0  |
| CHB | chr13 | PRR20A | 61990918 | 0  |
| CHB | chr13 | PRR20A | 62040918 | 10 |
| CHB | chr13 | PRR20A | 62090918 | 62 |
| CHB | chr19 | PSG3   | 37771642 | 0  |
| CHB | chr19 | PSG3   | 37821642 | 0  |
| CHB | chr19 | PSG3   | 37871642 | 0  |
| CHB | chr19 | PSG3   | 37921642 | 0  |

### 3\_Introgression\_data

|     |       |      |          |    |
|-----|-------|------|----------|----|
| CHB | chr19 | PSG3 | 37971642 | 0  |
| CHB | chr19 | PSG3 | 38021642 | 0  |
| CHB | chr19 | PSG3 | 38071642 | 0  |
| CHB | chr19 | PSG3 | 38121642 | 0  |
| CHB | chr19 | PSG3 | 38171642 | 0  |
| CHB | chr19 | PSG3 | 38221642 | 0  |
| CHB | chr19 | PSG3 | 38271642 | 0  |
| CHB | chr19 | PSG3 | 38321642 | 0  |
| CHB | chr19 | PSG3 | 38371642 | 0  |
| CHB | chr19 | PSG3 | 38421642 | 0  |
| CHB | chr19 | PSG3 | 38471642 | 0  |
| CHB | chr19 | PSG3 | 38521642 | 0  |
| CHB | chr19 | PSG3 | 38571642 | 0  |
| CHB | chr19 | PSG3 | 38621642 | 0  |
| CHB | chr19 | PSG3 | 38671642 | 0  |
| CHB | chr19 | PSG3 | 38721642 | 15 |
| CHB | chr19 | PSG3 | 38771642 | 31 |
| CHB | chr19 | PSG3 | 38821642 | 43 |
| CHB | chr19 | PSG3 | 38871642 | 38 |
| CHB | chr19 | PSG3 | 38921642 | 26 |
| CHB | chr19 | PSG3 | 38971642 | 29 |
| CHB | chr19 | PSG3 | 39021642 | 25 |
| CHB | chr19 | PSG3 | 39071642 | 26 |
| CHB | chr19 | PSG3 | 39121642 | 15 |
| CHB | chr19 | PSG3 | 39171642 | 0  |
| CHB | chr19 | PSG3 | 39221642 | 4  |
| CHB | chr19 | PSG3 | 39271642 | 20 |
| CHB | chr19 | PSG3 | 39321642 | 43 |
| CHB | chr19 | PSG3 | 39371642 | 49 |
| CHB | chr19 | PSG3 | 39421642 | 41 |
| CHB | chr19 | PSG3 | 39471642 | 20 |
| CHB | chr19 | PSG3 | 39521642 | 1  |
| CHB | chr19 | PSG3 | 39571642 | 0  |
| CHB | chr19 | PSG3 | 39621642 | 0  |
| CHB | chr19 | PSG3 | 39671642 | 0  |
| CHB | chr19 | PSG3 | 39721642 | 0  |
| CHB | chr19 | PSG3 | 39771642 | 0  |
| CHB | chr19 | PSG3 | 39821642 | 0  |
| CHB | chr19 | PSG3 | 39871642 | 0  |
| CHB | chr19 | PSG3 | 39921642 | 0  |
| CHB | chr19 | PSG3 | 39971642 | 0  |
| CHB | chr19 | PSG3 | 40021642 | 0  |
| CHB | chr19 | PSG3 | 40071642 | 0  |
| CHB | chr19 | PSG3 | 40121642 | 0  |
| CHB | chr19 | PSG3 | 40171642 | 0  |
| CHB | chr19 | PSG3 | 40221642 | 0  |
| CHB | chr19 | PSG3 | 40271642 | 0  |
| CHB | chr19 | PSG3 | 40321642 | 0  |
| CHB | chr19 | PSG3 | 40371642 | 0  |

## 3\_Introgression\_data

|     |       |      |          |    |
|-----|-------|------|----------|----|
| CHB | chr19 | PSG3 | 40421642 | 0  |
| CHB | chr19 | PSG3 | 40471642 | 0  |
| CHB | chr19 | PSG3 | 40521642 | 0  |
| CHB | chr19 | PSG3 | 40571642 | 0  |
| CHB | chr19 | PSG3 | 40621642 | 0  |
| CHB | chr19 | PSG3 | 40671642 | 0  |
| CHB | chr19 | PSG3 | 40721642 | 0  |
| CHB | chr19 | PSG3 | 40771642 | 0  |
| CHB | chr19 | PSG3 | 40821642 | 0  |
| CHB | chr19 | PSG3 | 40871642 | 0  |
| CHB | chr19 | PSG3 | 40921642 | 0  |
| CHB | chr19 | PSG3 | 40971642 | 0  |
| CHB | chr19 | PSG3 | 41021642 | 0  |
| CHB | chr19 | PSG3 | 41071642 | 0  |
| CHB | chr19 | PSG3 | 41121642 | 0  |
| CHB | chr19 | PSG3 | 41171642 | 0  |
| CHB | chr19 | PSG3 | 41221642 | 0  |
| CHB | chr19 | PSG3 | 41271642 | 0  |
| CHB | chr19 | PSG3 | 41321642 | 0  |
| CHB | chr19 | PSG3 | 41371642 | 0  |
| CHB | chr19 | PSG3 | 41421642 | 0  |
| CHB | chr19 | PSG3 | 41471642 | 0  |
| CHB | chr19 | PSG3 | 41521642 | 8  |
| CHB | chr19 | PSG3 | 41571642 | 56 |
| CHB | chr19 | PSG3 | 41621642 | 63 |
| CHB | chr19 | PSG3 | 41671642 | 15 |
| CHB | chr19 | PSG3 | 41721642 | 0  |
| CHB | chr19 | PSG3 | 41771642 | 0  |
| CHB | chr19 | PSG3 | 41821642 | 0  |
| CHB | chr19 | PSG3 | 41871642 | 0  |
| CHB | chr19 | PSG3 | 41921642 | 0  |
| CHB | chr19 | PSG3 | 41971642 | 0  |
| CHB | chr19 | PSG3 | 42021642 | 0  |
| CHB | chr19 | PSG3 | 42071642 | 0  |
| CHB | chr19 | PSG3 | 42121642 | 0  |
| CHB | chr19 | PSG3 | 42171642 | 0  |
| CHB | chr19 | PSG3 | 42221642 | 0  |
| CHB | chr19 | PSG3 | 42271642 | 0  |
| CHB | chr19 | PSG3 | 42321642 | 0  |
| CHB | chr19 | PSG3 | 42371642 | 0  |
| CHB | chr19 | PSG3 | 42421642 | 0  |
| CHB | chr19 | PSG3 | 42471642 | 0  |
| CHB | chr19 | PSG3 | 42521642 | 0  |
| CHB | chr19 | PSG3 | 42571642 | 0  |
| CHB | chr19 | PSG3 | 42621642 | 0  |
| CHB | chr19 | PSG3 | 42671642 | 0  |
| CHB | chr19 | PSG3 | 42721642 | 0  |
| CHB | chr19 | PSG3 | 42771642 | 0  |
| CHB | chr19 | PSG3 | 42821642 | 0  |



## 3\_Introgression\_data

|     |       |      |          |     |
|-----|-------|------|----------|-----|
| CHB | chr19 | PSG3 | 42871642 | 0   |
| CHB | chr19 | PSG3 | 42921642 | 0   |
| CHB | chr19 | PSG3 | 42971642 | 0   |
| CHB | chr19 | PSG3 | 43021642 | 0   |
| CHB | chr19 | PSG3 | 43071642 | 0   |
| CHB | chr19 | PSG3 | 43121642 | 4   |
| CHB | chr19 | PSG3 | 43171642 | 18  |
| CHB | chr19 | PSG3 | 43221642 | 48  |
| CHB | chr19 | PSG3 | 43271642 | 68  |
| CHB | chr19 | PSG3 | 43321642 | 76  |
| CHB | chr19 | PSG3 | 43371642 | 97  |
| CHB | chr19 | PSG3 | 43421642 | 127 |
| CHB | chr19 | PSG3 | 43471642 | 105 |
| CHB | chr19 | PSG3 | 43521642 | 75  |
| CHB | chr19 | PSG3 | 43571642 | 68  |
| CHB | chr19 | PSG3 | 43621642 | 33  |
| CHB | chr19 | PSG3 | 43671642 | 7   |
| CHB | chr19 | PSG3 | 43721642 | 0   |
| CHB | chr19 | PSG3 | 43771642 | 0   |
| CHB | chr19 | PSG3 | 43821642 | 0   |
| CHB | chr19 | PSG3 | 43871642 | 0   |
| CHB | chr19 | PSG3 | 43921642 | 0   |
| CHB | chr19 | PSG3 | 43971642 | 0   |
| CHB | chr19 | PSG3 | 44021642 | 0   |
| CHB | chr19 | PSG3 | 44071642 | 0   |
| CHB | chr19 | PSG3 | 44121642 | 0   |
| CHB | chr19 | PSG3 | 44171642 | 0   |
| CHB | chr19 | PSG3 | 44221642 | 0   |
| CHB | chr19 | PSG3 | 44271642 | 0   |
| CHB | chr19 | PSG3 | 44321642 | 0   |
| CHB | chr19 | PSG3 | 44371642 | 0   |
| CHB | chr19 | PSG3 | 44421642 | 0   |
| CHB | chr19 | PSG3 | 44471642 | 0   |
| CHB | chr19 | PSG3 | 44521642 | 0   |
| CHB | chr19 | PSG3 | 44571642 | 0   |
| CHB | chr19 | PSG3 | 44621642 | 0   |
| CHB | chr19 | PSG3 | 44671642 | 0   |
| CHB | chr19 | PSG3 | 44721642 | 0   |
| CHB | chr19 | PSG3 | 44771642 | 0   |
| CHB | chr19 | PSG3 | 44821642 | 0   |
| CHB | chr19 | PSG3 | 44871642 | 0   |
| CHB | chr19 | PSG3 | 44921642 | 0   |
| CHB | chr19 | PSG3 | 44971642 | 0   |
| CHB | chr19 | PSG3 | 45021642 | 0   |
| CHB | chr19 | PSG3 | 45071642 | 0   |
| CHB | chr19 | PSG3 | 45121642 | 0   |
| CHB | chr19 | PSG3 | 45171642 | 0   |
| CHB | chr19 | PSG3 | 45221642 | 0   |
| CHB | chr19 | PSG3 | 45271642 | 0   |

## 3\_Introgression\_data

|     |       |       |          |   |
|-----|-------|-------|----------|---|
| CHB | chr19 | PSG3  | 45321642 | 0 |
| CHB | chr19 | PSG3  | 45371642 | 0 |
| CHB | chr19 | PSG3  | 45421642 | 0 |
| CHB | chr19 | PSG3  | 45471642 | 0 |
| CHB | chr19 | PSG3  | 45521642 | 0 |
| CHB | chr19 | PSG3  | 45571642 | 0 |
| CHB | chr19 | PSG3  | 45621642 | 0 |
| CHB | chr19 | PSG3  | 45671642 | 0 |
| CHB | chr19 | PSG3  | 45721642 | 0 |
| CHB | chr19 | PSG3  | 45771642 | 0 |
| CHB | chr19 | PSG3  | 45821642 | 0 |
| CHB | chr19 | PSG3  | 45871642 | 0 |
| CHB | chr19 | PSG3  | 45921642 | 0 |
| CHB | chr19 | PSG3  | 45971642 | 0 |
| CHB | chr19 | PSG3  | 46021642 | 0 |
| CHB | chr19 | PSG3  | 46071642 | 0 |
| CHB | chr19 | PSG3  | 46121642 | 0 |
| CHB | chr19 | PSG3  | 46171642 | 0 |
| CHB | chr19 | PSG3  | 46221642 | 0 |
| CHB | chr19 | PSG3  | 46271642 | 0 |
| CHB | chr19 | PSG3  | 46321642 | 0 |
| CHB | chr19 | PSG3  | 46371642 | 0 |
| CHB | chr19 | PSG3  | 46421642 | 0 |
| CHB | chr19 | PSG3  | 46471642 | 0 |
| CHB | chr19 | PSG3  | 46521642 | 0 |
| CHB | chr19 | PSG3  | 46571642 | 0 |
| CHB | chr19 | PSG3  | 46621642 | 0 |
| CHB | chr19 | PSG3  | 46671642 | 0 |
| CHB | chr19 | PSG3  | 46721642 | 0 |
| CHB | chr19 | PSG3  | 46771642 | 0 |
| CHB | chr19 | PSG3  | 46821642 | 0 |
| CHB | chr19 | PSG3  | 46871642 | 0 |
| CHB | chr19 | PSG3  | 46921642 | 0 |
| CHB | chr19 | PSG3  | 46971642 | 0 |
| CHB | chr19 | PSG3  | 47021642 | 0 |
| CHB | chr19 | PSG3  | 47071642 | 0 |
| CHB | chr19 | PSG3  | 47121642 | 0 |
| CHB | chr19 | PSG3  | 47171642 | 0 |
| CHB | chr19 | PSG3  | 47221642 | 0 |
| CHB | chr19 | PSG3  | 47271642 | 0 |
| CHB | chr19 | PSG3  | 47321642 | 0 |
| CHB | chr19 | PSG3  | 47371642 | 0 |
| CHB | chr19 | PSG3  | 47421642 | 0 |
| CHB | chr19 | PSG3  | 47471642 | 0 |
| CHB | chr19 | PSG3  | 47521642 | 0 |
| CHB | chr19 | PSG3  | 47571642 | 0 |
| CHB | chr19 | PSG3  | 47621642 | 0 |
| CHB | chr19 | PSG3  | 47671642 | 0 |
| CHB | chr2  | RGPD1 | 81963577 | 0 |

## 3\_Introgression\_data

|     |      |       |          |    |
|-----|------|-------|----------|----|
| CHB | chr2 | RGPD1 | 82013577 | 0  |
| CHB | chr2 | RGPD1 | 82063577 | 0  |
| CHB | chr2 | RGPD1 | 82113577 | 0  |
| CHB | chr2 | RGPD1 | 82163577 | 0  |
| CHB | chr2 | RGPD1 | 82213577 | 0  |
| CHB | chr2 | RGPD1 | 82263577 | 0  |
| CHB | chr2 | RGPD1 | 82313577 | 0  |
| CHB | chr2 | RGPD1 | 82363577 | 0  |
| CHB | chr2 | RGPD1 | 82413577 | 0  |
| CHB | chr2 | RGPD1 | 82463577 | 0  |
| CHB | chr2 | RGPD1 | 82513577 | 0  |
| CHB | chr2 | RGPD1 | 82563577 | 0  |
| CHB | chr2 | RGPD1 | 82613577 | 0  |
| CHB | chr2 | RGPD1 | 82663577 | 0  |
| CHB | chr2 | RGPD1 | 82713577 | 0  |
| CHB | chr2 | RGPD1 | 82763577 | 0  |
| CHB | chr2 | RGPD1 | 82813577 | 0  |
| CHB | chr2 | RGPD1 | 82863577 | 0  |
| CHB | chr2 | RGPD1 | 82913577 | 0  |
| CHB | chr2 | RGPD1 | 82963577 | 0  |
| CHB | chr2 | RGPD1 | 83013577 | 0  |
| CHB | chr2 | RGPD1 | 83063577 | 0  |
| CHB | chr2 | RGPD1 | 83113577 | 0  |
| CHB | chr2 | RGPD1 | 83163577 | 0  |
| CHB | chr2 | RGPD1 | 83213577 | 0  |
| CHB | chr2 | RGPD1 | 83263577 | 0  |
| CHB | chr2 | RGPD1 | 83313577 | 0  |
| CHB | chr2 | RGPD1 | 83363577 | 0  |
| CHB | chr2 | RGPD1 | 83413577 | 0  |
| CHB | chr2 | RGPD1 | 83463577 | 0  |
| CHB | chr2 | RGPD1 | 83513577 | 0  |
| CHB | chr2 | RGPD1 | 83563577 | 0  |
| CHB | chr2 | RGPD1 | 83613577 | 0  |
| CHB | chr2 | RGPD1 | 83663577 | 0  |
| CHB | chr2 | RGPD1 | 83713577 | 0  |
| CHB | chr2 | RGPD1 | 83763577 | 0  |
| CHB | chr2 | RGPD1 | 83813577 | 0  |
| CHB | chr2 | RGPD1 | 83863577 | 0  |
| CHB | chr2 | RGPD1 | 83913577 | 0  |
| CHB | chr2 | RGPD1 | 83963577 | 0  |
| CHB | chr2 | RGPD1 | 84013577 | 0  |
| CHB | chr2 | RGPD1 | 84063577 | 0  |
| CHB | chr2 | RGPD1 | 84113577 | 0  |
| CHB | chr2 | RGPD1 | 84163577 | 0  |
| CHB | chr2 | RGPD1 | 84213577 | 0  |
| CHB | chr2 | RGPD1 | 84263577 | 0  |
| CHB | chr2 | RGPD1 | 84313577 | 0  |
| CHB | chr2 | RGPD1 | 84363577 | 14 |
| CHB | chr2 | RGPD1 | 84413577 | 52 |

## 3\_Introgression\_data

|     |      |       |          |    |
|-----|------|-------|----------|----|
| CHB | chr2 | RGPD1 | 84463577 | 76 |
| CHB | chr2 | RGPD1 | 84513577 | 55 |
| CHB | chr2 | RGPD1 | 84563577 | 31 |
| CHB | chr2 | RGPD1 | 84613577 | 37 |
| CHB | chr2 | RGPD1 | 84663577 | 38 |
| CHB | chr2 | RGPD1 | 84713577 | 27 |
| CHB | chr2 | RGPD1 | 84763577 | 25 |
| CHB | chr2 | RGPD1 | 84813577 | 28 |
| CHB | chr2 | RGPD1 | 84863577 | 29 |
| CHB | chr2 | RGPD1 | 84913577 | 30 |
| CHB | chr2 | RGPD1 | 84963577 | 44 |
| CHB | chr2 | RGPD1 | 85013577 | 41 |
| CHB | chr2 | RGPD1 | 85063577 | 16 |
| CHB | chr2 | RGPD1 | 85113577 | 3  |
| CHB | chr2 | RGPD1 | 85163577 | 0  |
| CHB | chr2 | RGPD1 | 85213577 | 0  |
| CHB | chr2 | RGPD1 | 85263577 | 0  |
| CHB | chr2 | RGPD1 | 85313577 | 0  |
| CHB | chr2 | RGPD1 | 85363577 | 0  |
| CHB | chr2 | RGPD1 | 85413577 | 0  |
| CHB | chr2 | RGPD1 | 85463577 | 0  |
| CHB | chr2 | RGPD1 | 85513577 | 0  |
| CHB | chr2 | RGPD1 | 85563577 | 0  |
| CHB | chr2 | RGPD1 | 85613577 | 0  |
| CHB | chr2 | RGPD1 | 85663577 | 0  |
| CHB | chr2 | RGPD1 | 85713577 | 0  |
| CHB | chr2 | RGPD1 | 85763577 | 0  |
| CHB | chr2 | RGPD1 | 85813577 | 23 |
| CHB | chr2 | RGPD1 | 85863577 | 66 |
| CHB | chr2 | RGPD1 | 85913577 | 63 |
| CHB | chr2 | RGPD1 | 85963577 | 37 |
| CHB | chr2 | RGPD1 | 86013577 | 43 |
| CHB | chr2 | RGPD1 | 86063577 | 41 |
| CHB | chr2 | RGPD1 | 86113577 | 37 |
| CHB | chr2 | RGPD1 | 86163577 | 63 |
| CHB | chr2 | RGPD1 | 86213577 | 63 |
| CHB | chr2 | RGPD1 | 86263577 | 38 |
| CHB | chr2 | RGPD1 | 86313577 | 28 |
| CHB | chr2 | RGPD1 | 86363577 | 21 |
| CHB | chr2 | RGPD1 | 86413577 | 23 |
| CHB | chr2 | RGPD1 | 86463577 | 20 |
| CHB | chr2 | RGPD1 | 86513577 | 39 |
| CHB | chr2 | RGPD1 | 86563577 | 56 |
| CHB | chr2 | RGPD1 | 86613577 | 39 |
| CHB | chr2 | RGPD1 | 86663577 | 16 |
| CHB | chr2 | RGPD1 | 86713577 | 0  |
| CHB | chr2 | RGPD1 | 86763577 | 0  |
| CHB | chr2 | RGPD1 | 86813577 | 0  |
| CHB | chr2 | RGPD1 | 86863577 | 0  |

3\_Introgression\_data

|     |      |       |          |    |
|-----|------|-------|----------|----|
| CHB | chr2 | RGPD1 | 86913577 | 0  |
| CHB | chr2 | RGPD1 | 86963577 | 0  |
| CHB | chr2 | RGPD1 | 87013577 | 0  |
| CHB | chr2 | RGPD1 | 87063577 | 0  |
| CHB | chr2 | RGPD1 | 87113577 | 0  |
| CHB | chr2 | RGPD1 | 87163577 | 0  |
| CHB | chr2 | RGPD1 | 87213577 | 0  |
| CHB | chr2 | RGPD1 | 87263577 | 0  |
| CHB | chr2 | RGPD1 | 87313577 | 0  |
| CHB | chr2 | RGPD1 | 87363577 | 0  |
| CHB | chr2 | RGPD1 | 87413577 | 0  |
| CHB | chr2 | RGPD1 | 87463577 | 0  |
| CHB | chr2 | RGPD1 | 87513577 | 0  |
| CHB | chr2 | RGPD1 | 87563577 | 0  |
| CHB | chr2 | RGPD1 | 87613577 | 0  |
| CHB | chr2 | RGPD1 | 87663577 | 0  |
| CHB | chr2 | RGPD1 | 87713577 | 6  |
| CHB | chr2 | RGPD1 | 87763577 | 20 |
| CHB | chr2 | RGPD1 | 87813577 | 33 |
| CHB | chr2 | RGPD1 | 87863577 | 28 |
| CHB | chr2 | RGPD1 | 87913577 | 9  |
| CHB | chr2 | RGPD1 | 87963577 | 0  |
| CHB | chr2 | RGPD1 | 88013577 | 0  |
| CHB | chr2 | RGPD1 | 88063577 | 0  |
| CHB | chr2 | RGPD1 | 88113577 | 0  |
| CHB | chr2 | RGPD1 | 88163577 | 0  |
| CHB | chr2 | RGPD1 | 88213577 | 0  |
| CHB | chr2 | RGPD1 | 88263577 | 0  |
| CHB | chr2 | RGPD1 | 88313577 | 0  |
| CHB | chr2 | RGPD1 | 88363577 | 0  |
| CHB | chr2 | RGPD1 | 88413577 | 0  |
| CHB | chr2 | RGPD1 | 88463577 | 0  |
| CHB | chr2 | RGPD1 | 88513577 | 0  |
| CHB | chr2 | RGPD1 | 88563577 | 0  |
| CHB | chr2 | RGPD1 | 88613577 | 0  |
| CHB | chr2 | RGPD1 | 88663577 | 0  |
| CHB | chr2 | RGPD1 | 88713577 | 0  |
| CHB | chr2 | RGPD1 | 88763577 | 0  |
| CHB | chr2 | RGPD1 | 88813577 | 0  |
| CHB | chr2 | RGPD1 | 88863577 | 0  |
| CHB | chr2 | RGPD1 | 88913577 | 0  |
| CHB | chr2 | RGPD1 | 88963577 | 0  |
| CHB | chr2 | RGPD1 | 89013577 | 0  |
| CHB | chr2 | RGPD1 | 89063577 | 0  |
| CHB | chr2 | RGPD1 | 89113577 | 0  |
| CHB | chr2 | RGPD1 | 89163577 | 19 |
| CHB | chr2 | RGPD1 | 89213577 | 30 |
| CHB | chr2 | RGPD1 | 89263577 | 22 |
| CHB | chr2 | RGPD1 | 89313577 | 13 |

## 3\_Introgression\_data

|     |      |       |          |   |
|-----|------|-------|----------|---|
| CHB | chr2 | RGPD1 | 89363577 | 2 |
| CHB | chr2 | RGPD1 | 89413577 | 0 |
| CHB | chr2 | RGPD1 | 89463577 | 0 |
| CHB | chr2 | RGPD1 | 89513577 | 0 |
| CHB | chr2 | RGPD1 | 89563577 | 0 |
| CHB | chr2 | RGPD1 | 89613577 | 0 |
| CHB | chr2 | RGPD1 | 89663577 | 0 |
| CHB | chr2 | RGPD1 | 89713577 | 0 |
| CHB | chr2 | RGPD1 | 89763577 | 0 |
| CHB | chr2 | RGPD1 | 89813577 | 0 |
| CHB | chr2 | RGPD1 | 89863577 | 0 |
| CHB | chr2 | RGPD1 | 89913577 | 0 |
| CHB | chr2 | RGPD1 | 89963577 | 0 |
| CHB | chr2 | RGPD1 | 90013577 | 0 |
| CHB | chr2 | RGPD1 | 90063577 | 0 |
| CHB | chr2 | RGPD1 | 90113577 | 0 |
| CHB | chr2 | RGPD1 | 90163577 | 0 |
| CHB | chr2 | RGPD1 | 90213577 | 0 |
| CHB | chr2 | RGPD1 | 90263577 | 0 |
| CHB | chr2 | RGPD1 | 90313577 | 0 |
| CHB | chr2 | RGPD1 | 90363577 | 0 |
| CHB | chr2 | RGPD1 | 90413577 | 0 |
| CHB | chr2 | RGPD1 | 90463577 | 0 |
| CHB | chr2 | RGPD1 | 90513577 | 0 |
| CHB | chr2 | RGPD1 | 90563577 | 0 |
| CHB | chr2 | RGPD1 | 90613577 | 0 |
| CHB | chr2 | RGPD1 | 90663577 | 0 |
| CHB | chr2 | RGPD1 | 90713577 | 0 |
| CHB | chr2 | RGPD1 | 90763577 | 0 |
| CHB | chr2 | RGPD1 | 90813577 | 0 |
| CHB | chr2 | RGPD1 | 90863577 | 0 |
| CHB | chr2 | RGPD1 | 90913577 | 0 |
| CHB | chr2 | RGPD1 | 90963577 | 0 |
| CHB | chr2 | RGPD1 | 91013577 | 0 |
| CHB | chr2 | RGPD1 | 91063577 | 0 |
| CHB | chr2 | RGPD1 | 91113577 | 0 |
| CHB | chr2 | RGPD1 | 91163577 | 0 |
| CHB | chr2 | RGPD1 | 91213577 | 0 |
| CHB | chr2 | RGPD1 | 91263577 | 0 |
| CHB | chr2 | RGPD1 | 91313577 | 0 |
| CHB | chr2 | RGPD1 | 91363577 | 0 |
| CHB | chr2 | RGPD1 | 91413577 | 0 |
| CHB | chr2 | RGPD1 | 91463577 | 0 |
| CHB | chr2 | RGPD1 | 91513577 | 0 |
| CHB | chr2 | RGPD1 | 91563577 | 0 |
| CHB | chr2 | RGPD1 | 91613577 | 0 |
| CHB | chr2 | RGPD1 | 91663577 | 0 |
| CHB | chr2 | RGPD1 | 91713577 | 0 |
| CHB | chr2 | RGPD1 | 91763577 | 0 |

## 3\_Introgression\_data

|     |      |        |          |   |
|-----|------|--------|----------|---|
| CHB | chr2 | RGPD1  | 91813577 | 0 |
| CHB | chr2 | RGPD1  | 91863577 | 0 |
| CHB | chr2 | RGPD1  | 91913577 | 0 |
| CHB | chr2 | RGPD1  | 91963577 | 0 |
| CHB | chr7 | SPDYE3 | 95356798 | 0 |
| CHB | chr7 | SPDYE3 | 95406798 | 0 |
| CHB | chr7 | SPDYE3 | 95456798 | 0 |
| CHB | chr7 | SPDYE3 | 95506798 | 0 |
| CHB | chr7 | SPDYE3 | 95556798 | 0 |
| CHB | chr7 | SPDYE3 | 95606798 | 0 |
| CHB | chr7 | SPDYE3 | 95656798 | 0 |
| CHB | chr7 | SPDYE3 | 95706798 | 0 |
| CHB | chr7 | SPDYE3 | 95756798 | 0 |
| CHB | chr7 | SPDYE3 | 95806798 | 0 |
| CHB | chr7 | SPDYE3 | 95856798 | 0 |
| CHB | chr7 | SPDYE3 | 95906798 | 0 |
| CHB | chr7 | SPDYE3 | 95956798 | 0 |
| CHB | chr7 | SPDYE3 | 96006798 | 0 |
| CHB | chr7 | SPDYE3 | 96056798 | 0 |
| CHB | chr7 | SPDYE3 | 96106798 | 0 |
| CHB | chr7 | SPDYE3 | 96156798 | 0 |
| CHB | chr7 | SPDYE3 | 96206798 | 0 |
| CHB | chr7 | SPDYE3 | 96256798 | 0 |
| CHB | chr7 | SPDYE3 | 96306798 | 0 |
| CHB | chr7 | SPDYE3 | 96356798 | 0 |
| CHB | chr7 | SPDYE3 | 96406798 | 0 |
| CHB | chr7 | SPDYE3 | 96456798 | 0 |
| CHB | chr7 | SPDYE3 | 96506798 | 0 |
| CHB | chr7 | SPDYE3 | 96556798 | 0 |
| CHB | chr7 | SPDYE3 | 96606798 | 0 |
| CHB | chr7 | SPDYE3 | 96656798 | 0 |
| CHB | chr7 | SPDYE3 | 96706798 | 0 |
| CHB | chr7 | SPDYE3 | 96756798 | 0 |
| CHB | chr7 | SPDYE3 | 96806798 | 0 |
| CHB | chr7 | SPDYE3 | 96856798 | 0 |
| CHB | chr7 | SPDYE3 | 96906798 | 0 |
| CHB | chr7 | SPDYE3 | 96956798 | 0 |
| CHB | chr7 | SPDYE3 | 97006798 | 0 |
| CHB | chr7 | SPDYE3 | 97056798 | 0 |
| CHB | chr7 | SPDYE3 | 97106798 | 0 |
| CHB | chr7 | SPDYE3 | 97156798 | 0 |
| CHB | chr7 | SPDYE3 | 97206798 | 0 |
| CHB | chr7 | SPDYE3 | 97256798 | 0 |
| CHB | chr7 | SPDYE3 | 97306798 | 0 |
| CHB | chr7 | SPDYE3 | 97356798 | 0 |
| CHB | chr7 | SPDYE3 | 97406798 | 0 |
| CHB | chr7 | SPDYE3 | 97456798 | 0 |
| CHB | chr7 | SPDYE3 | 97506798 | 0 |
| CHB | chr7 | SPDYE3 | 97556798 | 0 |

## 3\_Introgression\_data

|     |      |        |           |   |
|-----|------|--------|-----------|---|
| CHB | chr7 | SPDYE3 | 97606798  | 0 |
| CHB | chr7 | SPDYE3 | 97656798  | 0 |
| CHB | chr7 | SPDYE3 | 97706798  | 0 |
| CHB | chr7 | SPDYE3 | 97756798  | 0 |
| CHB | chr7 | SPDYE3 | 97806798  | 0 |
| CHB | chr7 | SPDYE3 | 97856798  | 0 |
| CHB | chr7 | SPDYE3 | 97906798  | 0 |
| CHB | chr7 | SPDYE3 | 97956798  | 0 |
| CHB | chr7 | SPDYE3 | 98006798  | 0 |
| CHB | chr7 | SPDYE3 | 98056798  | 0 |
| CHB | chr7 | SPDYE3 | 98106798  | 0 |
| CHB | chr7 | SPDYE3 | 98156798  | 0 |
| CHB | chr7 | SPDYE3 | 98206798  | 0 |
| CHB | chr7 | SPDYE3 | 98256798  | 0 |
| CHB | chr7 | SPDYE3 | 98306798  | 0 |
| CHB | chr7 | SPDYE3 | 98356798  | 0 |
| CHB | chr7 | SPDYE3 | 98406798  | 0 |
| CHB | chr7 | SPDYE3 | 98456798  | 0 |
| CHB | chr7 | SPDYE3 | 98506798  | 0 |
| CHB | chr7 | SPDYE3 | 98556798  | 0 |
| CHB | chr7 | SPDYE3 | 98606798  | 0 |
| CHB | chr7 | SPDYE3 | 98656798  | 0 |
| CHB | chr7 | SPDYE3 | 98706798  | 0 |
| CHB | chr7 | SPDYE3 | 98756798  | 0 |
| CHB | chr7 | SPDYE3 | 98806798  | 0 |
| CHB | chr7 | SPDYE3 | 98856798  | 0 |
| CHB | chr7 | SPDYE3 | 98906798  | 0 |
| CHB | chr7 | SPDYE3 | 98956798  | 0 |
| CHB | chr7 | SPDYE3 | 99006798  | 0 |
| CHB | chr7 | SPDYE3 | 99056798  | 0 |
| CHB | chr7 | SPDYE3 | 99106798  | 0 |
| CHB | chr7 | SPDYE3 | 99156798  | 0 |
| CHB | chr7 | SPDYE3 | 99206798  | 0 |
| CHB | chr7 | SPDYE3 | 99256798  | 0 |
| CHB | chr7 | SPDYE3 | 99306798  | 0 |
| CHB | chr7 | SPDYE3 | 99356798  | 0 |
| CHB | chr7 | SPDYE3 | 99406798  | 0 |
| CHB | chr7 | SPDYE3 | 99456798  | 0 |
| CHB | chr7 | SPDYE3 | 99506798  | 0 |
| CHB | chr7 | SPDYE3 | 99556798  | 0 |
| CHB | chr7 | SPDYE3 | 99606798  | 0 |
| CHB | chr7 | SPDYE3 | 99656798  | 0 |
| CHB | chr7 | SPDYE3 | 99706798  | 0 |
| CHB | chr7 | SPDYE3 | 99756798  | 0 |
| CHB | chr7 | SPDYE3 | 99806798  | 0 |
| CHB | chr7 | SPDYE3 | 99856798  | 0 |
| CHB | chr7 | SPDYE3 | 99906798  | 0 |
| CHB | chr7 | SPDYE3 | 99956798  | 0 |
| CHB | chr7 | SPDYE3 | 100006798 | 0 |



## 3\_Introgression\_data

|     |      |        |           |   |
|-----|------|--------|-----------|---|
| CHB | chr7 | SPDYE3 | 100056798 | 0 |
| CHB | chr7 | SPDYE3 | 100106798 | 0 |
| CHB | chr7 | SPDYE3 | 100156798 | 0 |
| CHB | chr7 | SPDYE3 | 100206798 | 0 |
| CHB | chr7 | SPDYE3 | 100256798 | 0 |
| CHB | chr7 | SPDYE3 | 100306798 | 0 |
| CHB | chr7 | SPDYE3 | 100356798 | 0 |
| CHB | chr7 | SPDYE3 | 100406798 | 0 |
| CHB | chr7 | SPDYE3 | 100456798 | 0 |
| CHB | chr7 | SPDYE3 | 100506798 | 0 |
| CHB | chr7 | SPDYE3 | 100556798 | 0 |
| CHB | chr7 | SPDYE3 | 100606798 | 0 |
| CHB | chr7 | SPDYE3 | 100656798 | 0 |
| CHB | chr7 | SPDYE3 | 100706798 | 0 |
| CHB | chr7 | SPDYE3 | 100756798 | 0 |
| CHB | chr7 | SPDYE3 | 100806798 | 0 |
| CHB | chr7 | SPDYE3 | 100856798 | 0 |
| CHB | chr7 | SPDYE3 | 100906798 | 0 |
| CHB | chr7 | SPDYE3 | 100956798 | 0 |
| CHB | chr7 | SPDYE3 | 101006798 | 0 |
| CHB | chr7 | SPDYE3 | 101056798 | 0 |
| CHB | chr7 | SPDYE3 | 101106798 | 0 |
| CHB | chr7 | SPDYE3 | 101156798 | 0 |
| CHB | chr7 | SPDYE3 | 101206798 | 0 |
| CHB | chr7 | SPDYE3 | 101256798 | 0 |
| CHB | chr7 | SPDYE3 | 101306798 | 0 |
| CHB | chr7 | SPDYE3 | 101356798 | 0 |
| CHB | chr7 | SPDYE3 | 101406798 | 0 |
| CHB | chr7 | SPDYE3 | 101456798 | 0 |
| CHB | chr7 | SPDYE3 | 101506798 | 0 |
| CHB | chr7 | SPDYE3 | 101556798 | 0 |
| CHB | chr7 | SPDYE3 | 101606798 | 0 |
| CHB | chr7 | SPDYE3 | 101656798 | 0 |
| CHB | chr7 | SPDYE3 | 101706798 | 0 |
| CHB | chr7 | SPDYE3 | 101756798 | 0 |
| CHB | chr7 | SPDYE3 | 101806798 | 0 |
| CHB | chr7 | SPDYE3 | 101856798 | 0 |
| CHB | chr7 | SPDYE3 | 101906798 | 0 |
| CHB | chr7 | SPDYE3 | 101956798 | 0 |
| CHB | chr7 | SPDYE3 | 102006798 | 0 |
| CHB | chr7 | SPDYE3 | 102056798 | 0 |
| CHB | chr7 | SPDYE3 | 102106798 | 0 |
| CHB | chr7 | SPDYE3 | 102156798 | 0 |
| CHB | chr7 | SPDYE3 | 102206798 | 0 |
| CHB | chr7 | SPDYE3 | 102256798 | 0 |
| CHB | chr7 | SPDYE3 | 102306798 | 0 |
| CHB | chr7 | SPDYE3 | 102356798 | 0 |
| CHB | chr7 | SPDYE3 | 102406798 | 0 |
| CHB | chr7 | SPDYE3 | 102456798 | 0 |

3\_Introgression\_data

|     |      |        |           |     |
|-----|------|--------|-----------|-----|
| CHB | chr7 | SPDYE3 | 102506798 | 0   |
| CHB | chr7 | SPDYE3 | 102556798 | 0   |
| CHB | chr7 | SPDYE3 | 102606798 | 0   |
| CHB | chr7 | SPDYE3 | 102656798 | 0   |
| CHB | chr7 | SPDYE3 | 102706798 | 0   |
| CHB | chr7 | SPDYE3 | 102756798 | 0   |
| CHB | chr7 | SPDYE3 | 102806798 | 0   |
| CHB | chr7 | SPDYE3 | 102856798 | 0   |
| CHB | chr7 | SPDYE3 | 102906798 | 0   |
| CHB | chr7 | SPDYE3 | 102956798 | 0   |
| CHB | chr7 | SPDYE3 | 103006798 | 0   |
| CHB | chr7 | SPDYE3 | 103056798 | 0   |
| CHB | chr7 | SPDYE3 | 103106798 | 0   |
| CHB | chr7 | SPDYE3 | 103156798 | 0   |
| CHB | chr7 | SPDYE3 | 103206798 | 0   |
| CHB | chr7 | SPDYE3 | 103256798 | 0   |
| CHB | chr7 | SPDYE3 | 103306798 | 0   |
| CHB | chr7 | SPDYE3 | 103356798 | 0   |
| CHB | chr7 | SPDYE3 | 103406798 | 21  |
| CHB | chr7 | SPDYE3 | 103456798 | 35  |
| CHB | chr7 | SPDYE3 | 103506798 | 82  |
| CHB | chr7 | SPDYE3 | 103556798 | 85  |
| CHB | chr7 | SPDYE3 | 103606798 | 17  |
| CHB | chr7 | SPDYE3 | 103656798 | 0   |
| CHB | chr7 | SPDYE3 | 103706798 | 0   |
| CHB | chr7 | SPDYE3 | 103756798 | 0   |
| CHB | chr7 | SPDYE3 | 103806798 | 0   |
| CHB | chr7 | SPDYE3 | 103856798 | 15  |
| CHB | chr7 | SPDYE3 | 103906798 | 34  |
| CHB | chr7 | SPDYE3 | 103956798 | 35  |
| CHB | chr7 | SPDYE3 | 104006798 | 34  |
| CHB | chr7 | SPDYE3 | 104056798 | 44  |
| CHB | chr7 | SPDYE3 | 104106798 | 44  |
| CHB | chr7 | SPDYE3 | 104156798 | 39  |
| CHB | chr7 | SPDYE3 | 104206798 | 77  |
| CHB | chr7 | SPDYE3 | 104256798 | 118 |
| CHB | chr7 | SPDYE3 | 104306798 | 73  |
| CHB | chr7 | SPDYE3 | 104356798 | 42  |
| CHB | chr7 | SPDYE3 | 104406798 | 37  |
| CHB | chr7 | SPDYE3 | 104456798 | 16  |
| CHB | chr7 | SPDYE3 | 104506798 | 30  |
| CHB | chr7 | SPDYE3 | 104556798 | 34  |
| CHB | chr7 | SPDYE3 | 104606798 | 49  |
| CHB | chr7 | SPDYE3 | 104656798 | 81  |
| CHB | chr7 | SPDYE3 | 104706798 | 70  |
| CHB | chr7 | SPDYE3 | 104756798 | 60  |
| CHB | chr7 | SPDYE3 | 104806798 | 78  |
| CHB | chr7 | SPDYE3 | 104856798 | 70  |
| CHB | chr7 | SPDYE3 | 104906798 | 50  |

## 3\_Introgression\_data

|     |       |         |           |     |
|-----|-------|---------|-----------|-----|
| CHB | chr7  | SPDYE3  | 104956798 | 38  |
| CHB | chr7  | SPDYE3  | 105006798 | 53  |
| CHB | chr7  | SPDYE3  | 105056798 | 67  |
| CHB | chr7  | SPDYE3  | 105106798 | 83  |
| CHB | chr7  | SPDYE3  | 105156798 | 138 |
| CHB | chr7  | SPDYE3  | 105206798 | 88  |
| CHB | chr7  | SPDYE3  | 105256798 | 3   |
| CHB | chr16 | SULT1A3 | 25249255  | 0   |
| CHB | chr16 | SULT1A3 | 25299255  | 0   |
| CHB | chr16 | SULT1A3 | 25349255  | 0   |
| CHB | chr16 | SULT1A3 | 25399255  | 0   |
| CHB | chr16 | SULT1A3 | 25449255  | 0   |
| CHB | chr16 | SULT1A3 | 25499255  | 0   |
| CHB | chr16 | SULT1A3 | 25549255  | 0   |
| CHB | chr16 | SULT1A3 | 25599255  | 0   |
| CHB | chr16 | SULT1A3 | 25649255  | 0   |
| CHB | chr16 | SULT1A3 | 25699255  | 0   |
| CHB | chr16 | SULT1A3 | 25749255  | 0   |
| CHB | chr16 | SULT1A3 | 25799255  | 0   |
| CHB | chr16 | SULT1A3 | 25849255  | 0   |
| CHB | chr16 | SULT1A3 | 25899255  | 6   |
| CHB | chr16 | SULT1A3 | 25949255  | 38  |
| CHB | chr16 | SULT1A3 | 25999255  | 32  |
| CHB | chr16 | SULT1A3 | 26049255  | 0   |
| CHB | chr16 | SULT1A3 | 26099255  | 0   |
| CHB | chr16 | SULT1A3 | 26149255  | 0   |
| CHB | chr16 | SULT1A3 | 26199255  | 0   |
| CHB | chr16 | SULT1A3 | 26249255  | 0   |
| CHB | chr16 | SULT1A3 | 26299255  | 0   |
| CHB | chr16 | SULT1A3 | 26349255  | 0   |
| CHB | chr16 | SULT1A3 | 26399255  | 0   |
| CHB | chr16 | SULT1A3 | 26449255  | 0   |
| CHB | chr16 | SULT1A3 | 26499255  | 0   |
| CHB | chr16 | SULT1A3 | 26549255  | 0   |
| CHB | chr16 | SULT1A3 | 26599255  | 0   |
| CHB | chr16 | SULT1A3 | 26649255  | 0   |
| CHB | chr16 | SULT1A3 | 26699255  | 0   |
| CHB | chr16 | SULT1A3 | 26749255  | 0   |
| CHB | chr16 | SULT1A3 | 26799255  | 0   |
| CHB | chr16 | SULT1A3 | 26849255  | 0   |
| CHB | chr16 | SULT1A3 | 26899255  | 0   |
| CHB | chr16 | SULT1A3 | 26949255  | 0   |
| CHB | chr16 | SULT1A3 | 26999255  | 0   |
| CHB | chr16 | SULT1A3 | 27049255  | 0   |
| CHB | chr16 | SULT1A3 | 27099255  | 0   |
| CHB | chr16 | SULT1A3 | 27149255  | 0   |
| CHB | chr16 | SULT1A3 | 27199255  | 0   |
| CHB | chr16 | SULT1A3 | 27249255  | 0   |
| CHB | chr16 | SULT1A3 | 27299255  | 0   |

## 3\_Introgression\_data

|     |       |         |          |   |
|-----|-------|---------|----------|---|
| CHB | chr16 | SULT1A3 | 27349255 | 0 |
| CHB | chr16 | SULT1A3 | 27399255 | 0 |
| CHB | chr16 | SULT1A3 | 27449255 | 0 |
| CHB | chr16 | SULT1A3 | 27499255 | 0 |
| CHB | chr16 | SULT1A3 | 27549255 | 0 |
| CHB | chr16 | SULT1A3 | 27599255 | 0 |
| CHB | chr16 | SULT1A3 | 27649255 | 0 |
| CHB | chr16 | SULT1A3 | 27699255 | 0 |
| CHB | chr16 | SULT1A3 | 27749255 | 0 |
| CHB | chr16 | SULT1A3 | 27799255 | 0 |
| CHB | chr16 | SULT1A3 | 27849255 | 0 |
| CHB | chr16 | SULT1A3 | 27899255 | 0 |
| CHB | chr16 | SULT1A3 | 27949255 | 0 |
| CHB | chr16 | SULT1A3 | 27999255 | 0 |
| CHB | chr16 | SULT1A3 | 28049255 | 0 |
| CHB | chr16 | SULT1A3 | 28099255 | 0 |
| CHB | chr16 | SULT1A3 | 28149255 | 0 |
| CHB | chr16 | SULT1A3 | 28199255 | 0 |
| CHB | chr16 | SULT1A3 | 28249255 | 0 |
| CHB | chr16 | SULT1A3 | 28299255 | 0 |
| CHB | chr16 | SULT1A3 | 28349255 | 0 |
| CHB | chr16 | SULT1A3 | 28399255 | 0 |
| CHB | chr16 | SULT1A3 | 28449255 | 0 |
| CHB | chr16 | SULT1A3 | 28499255 | 0 |
| CHB | chr16 | SULT1A3 | 28549255 | 0 |
| CHB | chr16 | SULT1A3 | 28599255 | 0 |
| CHB | chr16 | SULT1A3 | 28649255 | 0 |
| CHB | chr16 | SULT1A3 | 28699255 | 0 |
| CHB | chr16 | SULT1A3 | 28749255 | 0 |
| CHB | chr16 | SULT1A3 | 28799255 | 0 |
| CHB | chr16 | SULT1A3 | 28849255 | 0 |
| CHB | chr16 | SULT1A3 | 28899255 | 0 |
| CHB | chr16 | SULT1A3 | 28949255 | 0 |
| CHB | chr16 | SULT1A3 | 28999255 | 0 |
| CHB | chr16 | SULT1A3 | 29049255 | 0 |
| CHB | chr16 | SULT1A3 | 29099255 | 0 |
| CHB | chr16 | SULT1A3 | 29149255 | 0 |
| CHB | chr16 | SULT1A3 | 29199255 | 0 |
| CHB | chr16 | SULT1A3 | 29249255 | 0 |
| CHB | chr16 | SULT1A3 | 29299255 | 0 |
| CHB | chr16 | SULT1A3 | 29349255 | 0 |
| CHB | chr16 | SULT1A3 | 29399255 | 0 |
| CHB | chr16 | SULT1A3 | 29449255 | 0 |
| CHB | chr16 | SULT1A3 | 29499255 | 0 |
| CHB | chr16 | SULT1A3 | 29549255 | 0 |
| CHB | chr16 | SULT1A3 | 29599255 | 0 |
| CHB | chr16 | SULT1A3 | 29649255 | 0 |
| CHB | chr16 | SULT1A3 | 29699255 | 0 |
| CHB | chr16 | SULT1A3 | 29749255 | 0 |

## 3\_Introgression\_data

|     |       |         |          |   |
|-----|-------|---------|----------|---|
| CHB | chr16 | SULT1A3 | 29799255 | 0 |
| CHB | chr16 | SULT1A3 | 29849255 | 0 |
| CHB | chr16 | SULT1A3 | 29899255 | 0 |
| CHB | chr16 | SULT1A3 | 29949255 | 0 |
| CHB | chr16 | SULT1A3 | 29999255 | 0 |
| CHB | chr16 | SULT1A3 | 30049255 | 0 |
| CHB | chr16 | SULT1A3 | 30099255 | 0 |
| CHB | chr16 | SULT1A3 | 30149255 | 0 |
| CHB | chr16 | SULT1A3 | 30199255 | 0 |
| CHB | chr16 | SULT1A3 | 30249255 | 0 |
| CHB | chr16 | SULT1A3 | 30299255 | 0 |
| CHB | chr16 | SULT1A3 | 30349255 | 0 |
| CHB | chr16 | SULT1A3 | 30399255 | 0 |
| CHB | chr16 | SULT1A3 | 30449255 | 0 |
| CHB | chr16 | SULT1A3 | 30499255 | 0 |
| CHB | chr16 | SULT1A3 | 30549255 | 0 |
| CHB | chr16 | SULT1A3 | 30599255 | 0 |
| CHB | chr16 | SULT1A3 | 30649255 | 0 |
| CHB | chr16 | SULT1A3 | 30699255 | 0 |
| CHB | chr16 | SULT1A3 | 30749255 | 0 |
| CHB | chr16 | SULT1A3 | 30799255 | 0 |
| CHB | chr16 | SULT1A3 | 30849255 | 0 |
| CHB | chr16 | SULT1A3 | 30899255 | 0 |
| CHB | chr16 | SULT1A3 | 30949255 | 0 |
| CHB | chr16 | SULT1A3 | 30999255 | 0 |
| CHB | chr16 | SULT1A3 | 31049255 | 0 |
| CHB | chr16 | SULT1A3 | 31099255 | 0 |
| CHB | chr16 | SULT1A3 | 31149255 | 0 |
| CHB | chr16 | SULT1A3 | 31199255 | 0 |
| CHB | chr16 | SULT1A3 | 31249255 | 0 |
| CHB | chr16 | SULT1A3 | 31299255 | 0 |
| CHB | chr16 | SULT1A3 | 31349255 | 0 |
| CHB | chr16 | SULT1A3 | 31399255 | 0 |
| CHB | chr16 | SULT1A3 | 31449255 | 0 |
| CHB | chr16 | SULT1A3 | 31499255 | 0 |
| CHB | chr16 | SULT1A3 | 31549255 | 0 |
| CHB | chr16 | SULT1A3 | 31599255 | 0 |
| CHB | chr16 | SULT1A3 | 31649255 | 0 |
| CHB | chr16 | SULT1A3 | 31699255 | 0 |
| CHB | chr16 | SULT1A3 | 31749255 | 0 |
| CHB | chr16 | SULT1A3 | 31799255 | 0 |
| CHB | chr16 | SULT1A3 | 31849255 | 0 |
| CHB | chr16 | SULT1A3 | 31899255 | 0 |
| CHB | chr16 | SULT1A3 | 31949255 | 0 |
| CHB | chr16 | SULT1A3 | 31999255 | 0 |
| CHB | chr16 | SULT1A3 | 32049255 | 0 |
| CHB | chr16 | SULT1A3 | 32099255 | 0 |
| CHB | chr16 | SULT1A3 | 32149255 | 0 |
| CHB | chr16 | SULT1A3 | 32199255 | 0 |

## 3\_Introgression\_data

|     |       |         |          |   |
|-----|-------|---------|----------|---|
| CHB | chr16 | SULT1A3 | 32249255 | 0 |
| CHB | chr16 | SULT1A3 | 32299255 | 0 |
| CHB | chr16 | SULT1A3 | 32349255 | 0 |
| CHB | chr16 | SULT1A3 | 32399255 | 0 |
| CHB | chr16 | SULT1A3 | 32449255 | 0 |
| CHB | chr16 | SULT1A3 | 32499255 | 0 |
| CHB | chr16 | SULT1A3 | 32549255 | 0 |
| CHB | chr16 | SULT1A3 | 32599255 | 0 |
| CHB | chr16 | SULT1A3 | 32649255 | 0 |
| CHB | chr16 | SULT1A3 | 32699255 | 0 |
| CHB | chr16 | SULT1A3 | 32749255 | 0 |
| CHB | chr16 | SULT1A3 | 32799255 | 0 |
| CHB | chr16 | SULT1A3 | 32849255 | 0 |
| CHB | chr16 | SULT1A3 | 32899255 | 0 |
| CHB | chr16 | SULT1A3 | 32949255 | 0 |
| CHB | chr16 | SULT1A3 | 32999255 | 0 |
| CHB | chr16 | SULT1A3 | 33049255 | 0 |
| CHB | chr16 | SULT1A3 | 33099255 | 0 |
| CHB | chr16 | SULT1A3 | 33149255 | 0 |
| CHB | chr16 | SULT1A3 | 33199255 | 0 |
| CHB | chr16 | SULT1A3 | 33249255 | 0 |
| CHB | chr16 | SULT1A3 | 33299255 | 0 |
| CHB | chr16 | SULT1A3 | 33349255 | 0 |
| CHB | chr16 | SULT1A3 | 33399255 | 0 |
| CHB | chr16 | SULT1A3 | 33449255 | 0 |
| CHB | chr16 | SULT1A3 | 33499255 | 0 |
| CHB | chr16 | SULT1A3 | 33549255 | 0 |
| CHB | chr16 | SULT1A3 | 33599255 | 0 |
| CHB | chr16 | SULT1A3 | 33649255 | 0 |
| CHB | chr16 | SULT1A3 | 33699255 | 0 |
| CHB | chr16 | SULT1A3 | 33749255 | 0 |
| CHB | chr16 | SULT1A3 | 33799255 | 0 |
| CHB | chr16 | SULT1A3 | 33849255 | 0 |
| CHB | chr16 | SULT1A3 | 33899255 | 0 |
| CHB | chr16 | SULT1A3 | 33949255 | 0 |
| CHB | chr16 | SULT1A3 | 33999255 | 0 |
| CHB | chr16 | SULT1A3 | 34049255 | 0 |
| CHB | chr16 | SULT1A3 | 34099255 | 0 |
| CHB | chr16 | SULT1A3 | 34149255 | 0 |
| CHB | chr16 | SULT1A3 | 34199255 | 0 |
| CHB | chr16 | SULT1A3 | 34249255 | 0 |
| CHB | chr16 | SULT1A3 | 34299255 | 0 |
| CHB | chr16 | SULT1A3 | 34349255 | 0 |
| CHB | chr16 | SULT1A3 | 34399255 | 0 |
| CHB | chr16 | SULT1A3 | 34449255 | 0 |
| CHB | chr16 | SULT1A3 | 34499255 | 0 |
| CHB | chr16 | SULT1A3 | 34549255 | 0 |
| CHB | chr16 | SULT1A3 | 34599255 | 0 |
| CHB | chr16 | SULT1A3 | 34649255 | 0 |

## 3\_Introgression\_data

|     |       |         |           |     |
|-----|-------|---------|-----------|-----|
| CHB | chr16 | SULT1A3 | 34699255  | 0   |
| CHB | chr16 | SULT1A3 | 34749255  | 0   |
| CHB | chr16 | SULT1A3 | 34799255  | 0   |
| CHB | chr16 | SULT1A3 | 34849255  | 0   |
| CHB | chr16 | SULT1A3 | 34899255  | 0   |
| CHB | chr16 | SULT1A3 | 34949255  | 0   |
| CHB | chr16 | SULT1A3 | 34999255  | 0   |
| CHB | chr16 | SULT1A3 | 35049255  | 0   |
| CHB | chr16 | SULT1A3 | 35099255  | 0   |
| CHB | chr16 | SULT1A3 | 35149255  | 0   |
| CHB | chr6  | TBC1D3  | 116129494 | 0   |
| CHB | chr6  | TBC1D3  | 116179494 | 0   |
| CHB | chr6  | TBC1D3  | 116229494 | 0   |
| CHB | chr6  | TBC1D3  | 116279494 | 0   |
| CHB | chr6  | TBC1D3  | 116329494 | 0   |
| CHB | chr6  | TBC1D3  | 116379494 | 0   |
| CHB | chr6  | TBC1D3  | 116429494 | 0   |
| CHB | chr6  | TBC1D3  | 116479494 | 0   |
| CHB | chr6  | TBC1D3  | 116529494 | 0   |
| CHB | chr6  | TBC1D3  | 116579494 | 0   |
| CHB | chr6  | TBC1D3  | 116629494 | 0   |
| CHB | chr6  | TBC1D3  | 116679494 | 0   |
| CHB | chr6  | TBC1D3  | 116729494 | 0   |
| CHB | chr6  | TBC1D3  | 116779494 | 0   |
| CHB | chr6  | TBC1D3  | 116829494 | 0   |
| CHB | chr6  | TBC1D3  | 116879494 | 0   |
| CHB | chr6  | TBC1D3  | 116929494 | 0   |
| CHB | chr6  | TBC1D3  | 116979494 | 0   |
| CHB | chr6  | TBC1D3  | 117029494 | 0   |
| CHB | chr6  | TBC1D3  | 117079494 | 0   |
| CHB | chr6  | TBC1D3  | 117129494 | 0   |
| CHB | chr6  | TBC1D3  | 117179494 | 0   |
| CHB | chr6  | TBC1D3  | 117229494 | 0   |
| CHB | chr6  | TBC1D3  | 117279494 | 0   |
| CHB | chr6  | TBC1D3  | 117329494 | 0   |
| CHB | chr6  | TBC1D3  | 117379494 | 13  |
| CHB | chr6  | TBC1D3  | 117429494 | 65  |
| CHB | chr6  | TBC1D3  | 117479494 | 131 |
| CHB | chr6  | TBC1D3  | 117529494 | 92  |
| CHB | chr6  | TBC1D3  | 117579494 | 30  |
| CHB | chr6  | TBC1D3  | 117629494 | 55  |
| CHB | chr6  | TBC1D3  | 117679494 | 65  |
| CHB | chr6  | TBC1D3  | 117729494 | 73  |
| CHB | chr6  | TBC1D3  | 117779494 | 77  |
| CHB | chr6  | TBC1D3  | 117829494 | 47  |
| CHB | chr6  | TBC1D3  | 117879494 | 16  |
| CHB | chr6  | TBC1D3  | 117929494 | 0   |
| CHB | chr6  | TBC1D3  | 117979494 | 0   |
| CHB | chr6  | TBC1D3  | 118029494 | 0   |

3\_Introgression\_data

|     |      |        |           |     |
|-----|------|--------|-----------|-----|
| CHB | chr6 | TBC1D3 | 118079494 | 0   |
| CHB | chr6 | TBC1D3 | 118129494 | 0   |
| CHB | chr6 | TBC1D3 | 118179494 | 0   |
| CHB | chr6 | TBC1D3 | 118229494 | 0   |
| CHB | chr6 | TBC1D3 | 118279494 | 0   |
| CHB | chr6 | TBC1D3 | 118329494 | 0   |
| CHB | chr6 | TBC1D3 | 118379494 | 0   |
| CHB | chr6 | TBC1D3 | 118429494 | 0   |
| CHB | chr6 | TBC1D3 | 118479494 | 0   |
| CHB | chr6 | TBC1D3 | 118529494 | 0   |
| CHB | chr6 | TBC1D3 | 118579494 | 0   |
| CHB | chr6 | TBC1D3 | 118629494 | 0   |
| CHB | chr6 | TBC1D3 | 118679494 | 0   |
| CHB | chr6 | TBC1D3 | 118729494 | 0   |
| CHB | chr6 | TBC1D3 | 118779494 | 0   |
| CHB | chr6 | TBC1D3 | 118829494 | 0   |
| CHB | chr6 | TBC1D3 | 118879494 | 0   |
| CHB | chr6 | TBC1D3 | 118929494 | 0   |
| CHB | chr6 | TBC1D3 | 118979494 | 0   |
| CHB | chr6 | TBC1D3 | 119029494 | 0   |
| CHB | chr6 | TBC1D3 | 119079494 | 0   |
| CHB | chr6 | TBC1D3 | 119129494 | 0   |
| CHB | chr6 | TBC1D3 | 119179494 | 0   |
| CHB | chr6 | TBC1D3 | 119229494 | 0   |
| CHB | chr6 | TBC1D3 | 119279494 | 0   |
| CHB | chr6 | TBC1D3 | 119329494 | 0   |
| CHB | chr6 | TBC1D3 | 119379494 | 0   |
| CHB | chr6 | TBC1D3 | 119429494 | 8   |
| CHB | chr6 | TBC1D3 | 119479494 | 38  |
| CHB | chr6 | TBC1D3 | 119529494 | 50  |
| CHB | chr6 | TBC1D3 | 119579494 | 48  |
| CHB | chr6 | TBC1D3 | 119629494 | 142 |
| CHB | chr6 | TBC1D3 | 119679494 | 143 |
| CHB | chr6 | TBC1D3 | 119729494 | 54  |
| CHB | chr6 | TBC1D3 | 119779494 | 42  |
| CHB | chr6 | TBC1D3 | 119829494 | 27  |
| CHB | chr6 | TBC1D3 | 119879494 | 31  |
| CHB | chr6 | TBC1D3 | 119929494 | 30  |
| CHB | chr6 | TBC1D3 | 119979494 | 27  |
| CHB | chr6 | TBC1D3 | 120029494 | 87  |
| CHB | chr6 | TBC1D3 | 120079494 | 98  |
| CHB | chr6 | TBC1D3 | 120129494 | 49  |
| CHB | chr6 | TBC1D3 | 120179494 | 51  |
| CHB | chr6 | TBC1D3 | 120229494 | 37  |
| CHB | chr6 | TBC1D3 | 120279494 | 6   |
| CHB | chr6 | TBC1D3 | 120329494 | 0   |
| CHB | chr6 | TBC1D3 | 120379494 | 0   |
| CHB | chr6 | TBC1D3 | 120429494 | 0   |
| CHB | chr6 | TBC1D3 | 120479494 | 0   |



## 3\_Introgression\_data

|     |      |        |           |     |
|-----|------|--------|-----------|-----|
| CHB | chr6 | TBC1D3 | 120529494 | 0   |
| CHB | chr6 | TBC1D3 | 120579494 | 1   |
| CHB | chr6 | TBC1D3 | 120629494 | 22  |
| CHB | chr6 | TBC1D3 | 120679494 | 38  |
| CHB | chr6 | TBC1D3 | 120729494 | 95  |
| CHB | chr6 | TBC1D3 | 120779494 | 111 |
| CHB | chr6 | TBC1D3 | 120829494 | 82  |
| CHB | chr6 | TBC1D3 | 120879494 | 71  |
| CHB | chr6 | TBC1D3 | 120929494 | 38  |
| CHB | chr6 | TBC1D3 | 120979494 | 32  |
| CHB | chr6 | TBC1D3 | 121029494 | 40  |
| CHB | chr6 | TBC1D3 | 121079494 | 76  |
| CHB | chr6 | TBC1D3 | 121129494 | 113 |
| CHB | chr6 | TBC1D3 | 121179494 | 81  |
| CHB | chr6 | TBC1D3 | 121229494 | 38  |
| CHB | chr6 | TBC1D3 | 121279494 | 33  |
| CHB | chr6 | TBC1D3 | 121329494 | 39  |
| CHB | chr6 | TBC1D3 | 121379494 | 50  |
| CHB | chr6 | TBC1D3 | 121429494 | 36  |
| CHB | chr6 | TBC1D3 | 121479494 | 24  |
| CHB | chr6 | TBC1D3 | 121529494 | 59  |
| CHB | chr6 | TBC1D3 | 121579494 | 87  |
| CHB | chr6 | TBC1D3 | 121629494 | 62  |
| CHB | chr6 | TBC1D3 | 121679494 | 41  |
| CHB | chr6 | TBC1D3 | 121729494 | 53  |
| CHB | chr6 | TBC1D3 | 121779494 | 67  |
| CHB | chr6 | TBC1D3 | 121829494 | 59  |
| CHB | chr6 | TBC1D3 | 121879494 | 36  |
| CHB | chr6 | TBC1D3 | 121929494 | 68  |
| CHB | chr6 | TBC1D3 | 121979494 | 70  |
| CHB | chr6 | TBC1D3 | 122029494 | 25  |
| CHB | chr6 | TBC1D3 | 122079494 | 28  |
| CHB | chr6 | TBC1D3 | 122129494 | 34  |
| CHB | chr6 | TBC1D3 | 122179494 | 32  |
| CHB | chr6 | TBC1D3 | 122229494 | 33  |
| CHB | chr6 | TBC1D3 | 122279494 | 38  |
| CHB | chr6 | TBC1D3 | 122329494 | 29  |
| CHB | chr6 | TBC1D3 | 122379494 | 21  |
| CHB | chr6 | TBC1D3 | 122429494 | 30  |
| CHB | chr6 | TBC1D3 | 122479494 | 35  |
| CHB | chr6 | TBC1D3 | 122529494 | 39  |
| CHB | chr6 | TBC1D3 | 122579494 | 36  |
| CHB | chr6 | TBC1D3 | 122629494 | 36  |
| CHB | chr6 | TBC1D3 | 122679494 | 38  |
| CHB | chr6 | TBC1D3 | 122729494 | 30  |
| CHB | chr6 | TBC1D3 | 122779494 | 33  |
| CHB | chr6 | TBC1D3 | 122829494 | 42  |
| CHB | chr6 | TBC1D3 | 122879494 | 51  |
| CHB | chr6 | TBC1D3 | 122929494 | 50  |

## 3\_Introgression\_data

|     |      |        |           |    |
|-----|------|--------|-----------|----|
| CHB | chr6 | TBC1D3 | 122979494 | 49 |
| CHB | chr6 | TBC1D3 | 123029494 | 39 |
| CHB | chr6 | TBC1D3 | 123079494 | 12 |
| CHB | chr6 | TBC1D3 | 123129494 | 35 |
| CHB | chr6 | TBC1D3 | 123179494 | 35 |
| CHB | chr6 | TBC1D3 | 123229494 | 0  |
| CHB | chr6 | TBC1D3 | 123279494 | 0  |
| CHB | chr6 | TBC1D3 | 123329494 | 0  |
| CHB | chr6 | TBC1D3 | 123379494 | 0  |
| CHB | chr6 | TBC1D3 | 123429494 | 0  |
| CHB | chr6 | TBC1D3 | 123479494 | 21 |
| CHB | chr6 | TBC1D3 | 123529494 | 49 |
| CHB | chr6 | TBC1D3 | 123579494 | 48 |
| CHB | chr6 | TBC1D3 | 123629494 | 43 |
| CHB | chr6 | TBC1D3 | 123679494 | 55 |
| CHB | chr6 | TBC1D3 | 123729494 | 48 |
| CHB | chr6 | TBC1D3 | 123779494 | 34 |
| CHB | chr6 | TBC1D3 | 123829494 | 34 |
| CHB | chr6 | TBC1D3 | 123879494 | 16 |
| CHB | chr6 | TBC1D3 | 123929494 | 0  |
| CHB | chr6 | TBC1D3 | 123979494 | 0  |
| CHB | chr6 | TBC1D3 | 124029494 | 0  |
| CHB | chr6 | TBC1D3 | 124079494 | 0  |
| CHB | chr6 | TBC1D3 | 124129494 | 0  |
| CHB | chr6 | TBC1D3 | 124179494 | 0  |
| CHB | chr6 | TBC1D3 | 124229494 | 0  |
| CHB | chr6 | TBC1D3 | 124279494 | 0  |
| CHB | chr6 | TBC1D3 | 124329494 | 0  |
| CHB | chr6 | TBC1D3 | 124379494 | 0  |
| CHB | chr6 | TBC1D3 | 124429494 | 0  |
| CHB | chr6 | TBC1D3 | 124479494 | 0  |
| CHB | chr6 | TBC1D3 | 124529494 | 0  |
| CHB | chr6 | TBC1D3 | 124579494 | 0  |
| CHB | chr6 | TBC1D3 | 124629494 | 13 |
| CHB | chr6 | TBC1D3 | 124679494 | 40 |
| CHB | chr6 | TBC1D3 | 124729494 | 57 |
| CHB | chr6 | TBC1D3 | 124779494 | 42 |
| CHB | chr6 | TBC1D3 | 124829494 | 12 |
| CHB | chr6 | TBC1D3 | 124879494 | 0  |
| CHB | chr6 | TBC1D3 | 124929494 | 0  |
| CHB | chr6 | TBC1D3 | 124979494 | 0  |
| CHB | chr6 | TBC1D3 | 125029494 | 0  |
| CHB | chr6 | TBC1D3 | 125079494 | 0  |
| CHB | chr6 | TBC1D3 | 125129494 | 0  |
| CHB | chr6 | TBC1D3 | 125179494 | 0  |
| CHB | chr6 | TBC1D3 | 125229494 | 0  |
| CHB | chr6 | TBC1D3 | 125279494 | 0  |
| CHB | chr6 | TBC1D3 | 125329494 | 0  |
| CHB | chr6 | TBC1D3 | 125379494 | 0  |

## 3\_Introgression\_data

|     |      |        |           |   |
|-----|------|--------|-----------|---|
| CHB | chr6 | TBC1D3 | 125429494 | 0 |
| CHB | chr6 | TBC1D3 | 125479494 | 0 |
| CHB | chr6 | TBC1D3 | 125529494 | 0 |
| CHB | chr6 | TBC1D3 | 125579494 | 0 |
| CHB | chr6 | TBC1D3 | 125629494 | 0 |
| CHB | chr6 | TBC1D3 | 125679494 | 0 |
| CHB | chr6 | TBC1D3 | 125729494 | 0 |
| CHB | chr6 | TBC1D3 | 125779494 | 0 |
| CHB | chr6 | TBC1D3 | 125829494 | 0 |
| CHB | chr6 | TBC1D3 | 125879494 | 0 |
| CHB | chr6 | TBC1D3 | 125929494 | 0 |
| CHB | chr6 | TBC1D3 | 125979494 | 0 |
| CHB | chr6 | TBC1D3 | 126029494 | 0 |
| CHB | chr6 | TBC1D3 | 126079494 | 0 |
| CHB | chr6 | TBC1D3 | 126129494 | 0 |
| CHB | chr6 | TBC1D3 | 126179494 | 0 |
| CHB | chr6 | TBC1D3 | 126229494 | 0 |
| CHB | chr6 | TBC1D3 | 126279494 | 0 |
| CHB | chr8 | TBC1D3 | 118091961 | 0 |
| CHB | chr8 | TBC1D3 | 118141961 | 0 |
| CHB | chr8 | TBC1D3 | 118191961 | 0 |
| CHB | chr8 | TBC1D3 | 118241961 | 0 |
| CHB | chr8 | TBC1D3 | 118291961 | 0 |
| CHB | chr8 | TBC1D3 | 118341961 | 0 |
| CHB | chr8 | TBC1D3 | 118391961 | 0 |
| CHB | chr8 | TBC1D3 | 118441961 | 0 |
| CHB | chr8 | TBC1D3 | 118491961 | 0 |
| CHB | chr8 | TBC1D3 | 118541961 | 0 |
| CHB | chr8 | TBC1D3 | 118591961 | 0 |
| CHB | chr8 | TBC1D3 | 118641961 | 0 |
| CHB | chr8 | TBC1D3 | 118691961 | 0 |
| CHB | chr8 | TBC1D3 | 118741961 | 0 |
| CHB | chr8 | TBC1D3 | 118791961 | 0 |
| CHB | chr8 | TBC1D3 | 118841961 | 0 |
| CHB | chr8 | TBC1D3 | 118891961 | 0 |
| CHB | chr8 | TBC1D3 | 118941961 | 0 |
| CHB | chr8 | TBC1D3 | 118991961 | 0 |
| CHB | chr8 | TBC1D3 | 119041961 | 0 |
| CHB | chr8 | TBC1D3 | 119091961 | 0 |
| CHB | chr8 | TBC1D3 | 119141961 | 0 |
| CHB | chr8 | TBC1D3 | 119191961 | 0 |
| CHB | chr8 | TBC1D3 | 119241961 | 0 |
| CHB | chr8 | TBC1D3 | 119291961 | 0 |
| CHB | chr8 | TBC1D3 | 119341961 | 0 |
| CHB | chr8 | TBC1D3 | 119391961 | 0 |
| CHB | chr8 | TBC1D3 | 119441961 | 0 |
| CHB | chr8 | TBC1D3 | 119491961 | 0 |
| CHB | chr8 | TBC1D3 | 119541961 | 0 |
| CHB | chr8 | TBC1D3 | 119591961 | 0 |

## 3\_Introgression\_data

|     |      |        |           |   |
|-----|------|--------|-----------|---|
| CHB | chr8 | TBC1D3 | 119641961 | 0 |
| CHB | chr8 | TBC1D3 | 119691961 | 0 |
| CHB | chr8 | TBC1D3 | 119741961 | 0 |
| CHB | chr8 | TBC1D3 | 119791961 | 0 |
| CHB | chr8 | TBC1D3 | 119841961 | 0 |
| CHB | chr8 | TBC1D3 | 119891961 | 0 |
| CHB | chr8 | TBC1D3 | 119941961 | 0 |
| CHB | chr8 | TBC1D3 | 119991961 | 0 |
| CHB | chr8 | TBC1D3 | 120041961 | 0 |
| CHB | chr8 | TBC1D3 | 120091961 | 0 |
| CHB | chr8 | TBC1D3 | 120141961 | 0 |
| CHB | chr8 | TBC1D3 | 120191961 | 0 |
| CHB | chr8 | TBC1D3 | 120241961 | 0 |
| CHB | chr8 | TBC1D3 | 120291961 | 0 |
| CHB | chr8 | TBC1D3 | 120341961 | 0 |
| CHB | chr8 | TBC1D3 | 120391961 | 0 |
| CHB | chr8 | TBC1D3 | 120441961 | 0 |
| CHB | chr8 | TBC1D3 | 120491961 | 0 |
| CHB | chr8 | TBC1D3 | 120541961 | 0 |
| CHB | chr8 | TBC1D3 | 120591961 | 0 |
| CHB | chr8 | TBC1D3 | 120641961 | 0 |
| CHB | chr8 | TBC1D3 | 120691961 | 0 |
| CHB | chr8 | TBC1D3 | 120741961 | 0 |
| CHB | chr8 | TBC1D3 | 120791961 | 0 |
| CHB | chr8 | TBC1D3 | 120841961 | 0 |
| CHB | chr8 | TBC1D3 | 120891961 | 0 |
| CHB | chr8 | TBC1D3 | 120941961 | 0 |
| CHB | chr8 | TBC1D3 | 120991961 | 0 |
| CHB | chr8 | TBC1D3 | 121041961 | 0 |
| CHB | chr8 | TBC1D3 | 121091961 | 0 |
| CHB | chr8 | TBC1D3 | 121141961 | 0 |
| CHB | chr8 | TBC1D3 | 121191961 | 0 |
| CHB | chr8 | TBC1D3 | 121241961 | 0 |
| CHB | chr8 | TBC1D3 | 121291961 | 0 |
| CHB | chr8 | TBC1D3 | 121341961 | 0 |
| CHB | chr8 | TBC1D3 | 121391961 | 0 |
| CHB | chr8 | TBC1D3 | 121441961 | 0 |
| CHB | chr8 | TBC1D3 | 121491961 | 0 |
| CHB | chr8 | TBC1D3 | 121541961 | 0 |
| CHB | chr8 | TBC1D3 | 121591961 | 0 |
| CHB | chr8 | TBC1D3 | 121641961 | 0 |
| CHB | chr8 | TBC1D3 | 121691961 | 0 |
| CHB | chr8 | TBC1D3 | 121741961 | 0 |
| CHB | chr8 | TBC1D3 | 121791961 | 0 |
| CHB | chr8 | TBC1D3 | 121841961 | 0 |
| CHB | chr8 | TBC1D3 | 121891961 | 0 |
| CHB | chr8 | TBC1D3 | 121941961 | 0 |
| CHB | chr8 | TBC1D3 | 121991961 | 0 |
| CHB | chr8 | TBC1D3 | 122041961 | 0 |

## 3\_Introgression\_data

|     |      |        |           |    |
|-----|------|--------|-----------|----|
| CHB | chr8 | TBC1D3 | 122091961 | 0  |
| CHB | chr8 | TBC1D3 | 122141961 | 0  |
| CHB | chr8 | TBC1D3 | 122191961 | 0  |
| CHB | chr8 | TBC1D3 | 122241961 | 0  |
| CHB | chr8 | TBC1D3 | 122291961 | 0  |
| CHB | chr8 | TBC1D3 | 122341961 | 0  |
| CHB | chr8 | TBC1D3 | 122391961 | 0  |
| CHB | chr8 | TBC1D3 | 122441961 | 0  |
| CHB | chr8 | TBC1D3 | 122491961 | 0  |
| CHB | chr8 | TBC1D3 | 122541961 | 0  |
| CHB | chr8 | TBC1D3 | 122591961 | 0  |
| CHB | chr8 | TBC1D3 | 122641961 | 0  |
| CHB | chr8 | TBC1D3 | 122691961 | 0  |
| CHB | chr8 | TBC1D3 | 122741961 | 0  |
| CHB | chr8 | TBC1D3 | 122791961 | 0  |
| CHB | chr8 | TBC1D3 | 122841961 | 0  |
| CHB | chr8 | TBC1D3 | 122891961 | 0  |
| CHB | chr8 | TBC1D3 | 122941961 | 0  |
| CHB | chr8 | TBC1D3 | 122991961 | 0  |
| CHB | chr8 | TBC1D3 | 123041961 | 0  |
| CHB | chr8 | TBC1D3 | 123091961 | 0  |
| CHB | chr8 | TBC1D3 | 123141961 | 0  |
| CHB | chr8 | TBC1D3 | 123191961 | 0  |
| CHB | chr8 | TBC1D3 | 123241961 | 0  |
| CHB | chr8 | TBC1D3 | 123291961 | 0  |
| CHB | chr8 | TBC1D3 | 123341961 | 0  |
| CHB | chr8 | TBC1D3 | 123391961 | 0  |
| CHB | chr8 | TBC1D3 | 123441961 | 0  |
| CHB | chr8 | TBC1D3 | 123491961 | 0  |
| CHB | chr8 | TBC1D3 | 123541961 | 0  |
| CHB | chr8 | TBC1D3 | 123591961 | 0  |
| CHB | chr8 | TBC1D3 | 123641961 | 0  |
| CHB | chr8 | TBC1D3 | 123691961 | 0  |
| CHB | chr8 | TBC1D3 | 123741961 | 0  |
| CHB | chr8 | TBC1D3 | 123791961 | 0  |
| CHB | chr8 | TBC1D3 | 123841961 | 0  |
| CHB | chr8 | TBC1D3 | 123891961 | 17 |
| CHB | chr8 | TBC1D3 | 123941961 | 51 |
| CHB | chr8 | TBC1D3 | 123991961 | 35 |
| CHB | chr8 | TBC1D3 | 124041961 | 1  |
| CHB | chr8 | TBC1D3 | 124091961 | 0  |
| CHB | chr8 | TBC1D3 | 124141961 | 0  |
| CHB | chr8 | TBC1D3 | 124191961 | 0  |
| CHB | chr8 | TBC1D3 | 124241961 | 0  |
| CHB | chr8 | TBC1D3 | 124291961 | 0  |
| CHB | chr8 | TBC1D3 | 124341961 | 0  |
| CHB | chr8 | TBC1D3 | 124391961 | 0  |
| CHB | chr8 | TBC1D3 | 124441961 | 0  |
| CHB | chr8 | TBC1D3 | 124491961 | 0  |

## 3\_Introgression\_data

|     |      |        |           |   |
|-----|------|--------|-----------|---|
| CHB | chr8 | TBC1D3 | 124541961 | 0 |
| CHB | chr8 | TBC1D3 | 124591961 | 0 |
| CHB | chr8 | TBC1D3 | 124641961 | 0 |
| CHB | chr8 | TBC1D3 | 124691961 | 0 |
| CHB | chr8 | TBC1D3 | 124741961 | 0 |
| CHB | chr8 | TBC1D3 | 124791961 | 0 |
| CHB | chr8 | TBC1D3 | 124841961 | 0 |
| CHB | chr8 | TBC1D3 | 124891961 | 0 |
| CHB | chr8 | TBC1D3 | 124941961 | 0 |
| CHB | chr8 | TBC1D3 | 124991961 | 0 |
| CHB | chr8 | TBC1D3 | 125041961 | 0 |
| CHB | chr8 | TBC1D3 | 125091961 | 0 |
| CHB | chr8 | TBC1D3 | 125141961 | 0 |
| CHB | chr8 | TBC1D3 | 125191961 | 0 |
| CHB | chr8 | TBC1D3 | 125241961 | 0 |
| CHB | chr8 | TBC1D3 | 125291961 | 0 |
| CHB | chr8 | TBC1D3 | 125341961 | 0 |
| CHB | chr8 | TBC1D3 | 125391961 | 0 |
| CHB | chr8 | TBC1D3 | 125441961 | 0 |
| CHB | chr8 | TBC1D3 | 125491961 | 0 |
| CHB | chr8 | TBC1D3 | 125541961 | 0 |
| CHB | chr8 | TBC1D3 | 125591961 | 0 |
| CHB | chr8 | TBC1D3 | 125641961 | 0 |
| CHB | chr8 | TBC1D3 | 125691961 | 0 |
| CHB | chr8 | TBC1D3 | 125741961 | 0 |
| CHB | chr8 | TBC1D3 | 125791961 | 0 |
| CHB | chr8 | TBC1D3 | 125841961 | 0 |
| CHB | chr8 | TBC1D3 | 125891961 | 0 |
| CHB | chr8 | TBC1D3 | 125941961 | 0 |
| CHB | chr8 | TBC1D3 | 125991961 | 0 |
| CHB | chr8 | TBC1D3 | 126041961 | 0 |
| CHB | chr8 | TBC1D3 | 126091961 | 0 |
| CHB | chr8 | TBC1D3 | 126141961 | 0 |
| CHB | chr8 | TBC1D3 | 126191961 | 0 |
| CHB | chr8 | TBC1D3 | 126241961 | 0 |
| CHB | chr8 | TBC1D3 | 126291961 | 0 |
| CHB | chr8 | TBC1D3 | 126341961 | 0 |
| CHB | chr8 | TBC1D3 | 126391961 | 0 |
| CHB | chr8 | TBC1D3 | 126441961 | 0 |
| CHB | chr8 | TBC1D3 | 126491961 | 0 |
| CHB | chr8 | TBC1D3 | 126541961 | 0 |
| CHB | chr8 | TBC1D3 | 126591961 | 0 |
| CHB | chr8 | TBC1D3 | 126641961 | 0 |
| CHB | chr8 | TBC1D3 | 126691961 | 0 |
| CHB | chr8 | TBC1D3 | 126741961 | 0 |
| CHB | chr8 | TBC1D3 | 126791961 | 0 |
| CHB | chr8 | TBC1D3 | 126841961 | 0 |
| CHB | chr8 | TBC1D3 | 126891961 | 0 |
| CHB | chr8 | TBC1D3 | 126941961 | 0 |

## 3\_Introgression\_data

|     |       |        |           |    |
|-----|-------|--------|-----------|----|
| CHB | chr8  | TBC1D3 | 126991961 | 0  |
| CHB | chr8  | TBC1D3 | 127041961 | 0  |
| CHB | chr8  | TBC1D3 | 127091961 | 0  |
| CHB | chr8  | TBC1D3 | 127141961 | 0  |
| CHB | chr8  | TBC1D3 | 127191961 | 0  |
| CHB | chr8  | TBC1D3 | 127241961 | 0  |
| CHB | chr8  | TBC1D3 | 127291961 | 0  |
| CHB | chr8  | TBC1D3 | 127341961 | 0  |
| CHB | chr8  | TBC1D3 | 127391961 | 0  |
| CHB | chr8  | TBC1D3 | 127441961 | 0  |
| CHB | chr8  | TBC1D3 | 127491961 | 0  |
| CHB | chr8  | TBC1D3 | 127541961 | 0  |
| CHB | chr8  | TBC1D3 | 127591961 | 0  |
| CHB | chr8  | TBC1D3 | 127641961 | 0  |
| CHB | chr8  | TBC1D3 | 127691961 | 0  |
| CHB | chr8  | TBC1D3 | 127741961 | 0  |
| CHB | chr8  | TBC1D3 | 127791961 | 0  |
| CHB | chr8  | TBC1D3 | 127841961 | 0  |
| CHB | chr8  | TBC1D3 | 127891961 | 0  |
| CHB | chr8  | TBC1D3 | 127941961 | 0  |
| CHB | chr8  | TBC1D3 | 127991961 | 0  |
| CHB | chr8  | TBC1D3 | 128041961 | 0  |
| CHB | chr8  | TBC1D3 | 128091961 | 0  |
| CHB | chr12 | TBC1D3 | 59809484  | 3  |
| CHB | chr12 | TBC1D3 | 59859484  | 0  |
| CHB | chr12 | TBC1D3 | 59909484  | 0  |
| CHB | chr12 | TBC1D3 | 59959484  | 0  |
| CHB | chr12 | TBC1D3 | 60009484  | 0  |
| CHB | chr12 | TBC1D3 | 60059484  | 0  |
| CHB | chr12 | TBC1D3 | 60109484  | 0  |
| CHB | chr12 | TBC1D3 | 60159484  | 0  |
| CHB | chr12 | TBC1D3 | 60209484  | 0  |
| CHB | chr12 | TBC1D3 | 60259484  | 7  |
| CHB | chr12 | TBC1D3 | 60309484  | 17 |
| CHB | chr12 | TBC1D3 | 60359484  | 18 |
| CHB | chr12 | TBC1D3 | 60409484  | 16 |
| CHB | chr12 | TBC1D3 | 60459484  | 18 |
| CHB | chr12 | TBC1D3 | 60509484  | 20 |
| CHB | chr12 | TBC1D3 | 60559484  | 31 |
| CHB | chr12 | TBC1D3 | 60609484  | 30 |
| CHB | chr12 | TBC1D3 | 60659484  | 23 |
| CHB | chr12 | TBC1D3 | 60709484  | 31 |
| CHB | chr12 | TBC1D3 | 60759484  | 31 |
| CHB | chr12 | TBC1D3 | 60809484  | 29 |
| CHB | chr12 | TBC1D3 | 60859484  | 30 |
| CHB | chr12 | TBC1D3 | 60909484  | 29 |
| CHB | chr12 | TBC1D3 | 60959484  | 39 |
| CHB | chr12 | TBC1D3 | 61009484  | 37 |
| CHB | chr12 | TBC1D3 | 61059484  | 20 |

## 3\_Introgression\_data

|     |       |        |          |    |
|-----|-------|--------|----------|----|
| CHB | chr12 | TBC1D3 | 61109484 | 21 |
| CHB | chr12 | TBC1D3 | 61159484 | 31 |
| CHB | chr12 | TBC1D3 | 61209484 | 39 |
| CHB | chr12 | TBC1D3 | 61259484 | 35 |
| CHB | chr12 | TBC1D3 | 61309484 | 48 |
| CHB | chr12 | TBC1D3 | 61359484 | 87 |
| CHB | chr12 | TBC1D3 | 61409484 | 88 |
| CHB | chr12 | TBC1D3 | 61459484 | 53 |
| CHB | chr12 | TBC1D3 | 61509484 | 28 |
| CHB | chr12 | TBC1D3 | 61559484 | 32 |
| CHB | chr12 | TBC1D3 | 61609484 | 54 |
| CHB | chr12 | TBC1D3 | 61659484 | 41 |
| CHB | chr12 | TBC1D3 | 61709484 | 24 |
| CHB | chr12 | TBC1D3 | 61759484 | 15 |
| CHB | chr12 | TBC1D3 | 61809484 | 0  |
| CHB | chr12 | TBC1D3 | 61859484 | 0  |
| CHB | chr12 | TBC1D3 | 61909484 | 0  |
| CHB | chr12 | TBC1D3 | 61959484 | 0  |
| CHB | chr12 | TBC1D3 | 62009484 | 0  |
| CHB | chr12 | TBC1D3 | 62059484 | 0  |
| CHB | chr12 | TBC1D3 | 62109484 | 0  |
| CHB | chr12 | TBC1D3 | 62159484 | 0  |
| CHB | chr12 | TBC1D3 | 62209484 | 0  |
| CHB | chr12 | TBC1D3 | 62259484 | 0  |
| CHB | chr12 | TBC1D3 | 62309484 | 0  |
| CHB | chr12 | TBC1D3 | 62359484 | 0  |
| CHB | chr12 | TBC1D3 | 62409484 | 0  |
| CHB | chr12 | TBC1D3 | 62459484 | 0  |
| CHB | chr12 | TBC1D3 | 62509484 | 0  |
| CHB | chr12 | TBC1D3 | 62559484 | 0  |
| CHB | chr12 | TBC1D3 | 62609484 | 0  |
| CHB | chr12 | TBC1D3 | 62659484 | 0  |
| CHB | chr12 | TBC1D3 | 62709484 | 0  |
| CHB | chr12 | TBC1D3 | 62759484 | 0  |
| CHB | chr12 | TBC1D3 | 62809484 | 0  |
| CHB | chr12 | TBC1D3 | 62859484 | 0  |
| CHB | chr12 | TBC1D3 | 62909484 | 0  |
| CHB | chr12 | TBC1D3 | 62959484 | 0  |
| CHB | chr12 | TBC1D3 | 63009484 | 0  |
| CHB | chr12 | TBC1D3 | 63059484 | 0  |
| CHB | chr12 | TBC1D3 | 63109484 | 0  |
| CHB | chr12 | TBC1D3 | 63159484 | 0  |
| CHB | chr12 | TBC1D3 | 63209484 | 0  |
| CHB | chr12 | TBC1D3 | 63259484 | 0  |
| CHB | chr12 | TBC1D3 | 63309484 | 0  |
| CHB | chr12 | TBC1D3 | 63359484 | 0  |
| CHB | chr12 | TBC1D3 | 63409484 | 0  |
| CHB | chr12 | TBC1D3 | 63459484 | 0  |
| CHB | chr12 | TBC1D3 | 63509484 | 0  |



## 3\_Introgression\_data

|     |       |        |          |     |
|-----|-------|--------|----------|-----|
| CHB | chr12 | TBC1D3 | 63559484 | 0   |
| CHB | chr12 | TBC1D3 | 63609484 | 0   |
| CHB | chr12 | TBC1D3 | 63659484 | 0   |
| CHB | chr12 | TBC1D3 | 63709484 | 0   |
| CHB | chr12 | TBC1D3 | 63759484 | 0   |
| CHB | chr12 | TBC1D3 | 63809484 | 0   |
| CHB | chr12 | TBC1D3 | 63859484 | 0   |
| CHB | chr12 | TBC1D3 | 63909484 | 21  |
| CHB | chr12 | TBC1D3 | 63959484 | 45  |
| CHB | chr12 | TBC1D3 | 64009484 | 39  |
| CHB | chr12 | TBC1D3 | 64059484 | 46  |
| CHB | chr12 | TBC1D3 | 64109484 | 126 |
| CHB | chr12 | TBC1D3 | 64159484 | 110 |
| CHB | chr12 | TBC1D3 | 64209484 | 26  |
| CHB | chr12 | TBC1D3 | 64259484 | 35  |
| CHB | chr12 | TBC1D3 | 64309484 | 26  |
| CHB | chr12 | TBC1D3 | 64359484 | 2   |
| CHB | chr12 | TBC1D3 | 64409484 | 0   |
| CHB | chr12 | TBC1D3 | 64459484 | 0   |
| CHB | chr12 | TBC1D3 | 64509484 | 0   |
| CHB | chr12 | TBC1D3 | 64559484 | 0   |
| CHB | chr12 | TBC1D3 | 64609484 | 0   |
| CHB | chr12 | TBC1D3 | 64659484 | 0   |
| CHB | chr12 | TBC1D3 | 64709484 | 0   |
| CHB | chr12 | TBC1D3 | 64759484 | 0   |
| CHB | chr12 | TBC1D3 | 64809484 | 0   |
| CHB | chr12 | TBC1D3 | 64859484 | 0   |
| CHB | chr12 | TBC1D3 | 64909484 | 0   |
| CHB | chr12 | TBC1D3 | 64959484 | 0   |
| CHB | chr12 | TBC1D3 | 65009484 | 0   |
| CHB | chr12 | TBC1D3 | 65059484 | 0   |
| CHB | chr12 | TBC1D3 | 65109484 | 0   |
| CHB | chr12 | TBC1D3 | 65159484 | 0   |
| CHB | chr12 | TBC1D3 | 65209484 | 0   |
| CHB | chr12 | TBC1D3 | 65259484 | 0   |
| CHB | chr12 | TBC1D3 | 65309484 | 0   |
| CHB | chr12 | TBC1D3 | 65359484 | 0   |
| CHB | chr12 | TBC1D3 | 65409484 | 0   |
| CHB | chr12 | TBC1D3 | 65459484 | 0   |
| CHB | chr12 | TBC1D3 | 65509484 | 0   |
| CHB | chr12 | TBC1D3 | 65559484 | 0   |
| CHB | chr12 | TBC1D3 | 65609484 | 0   |
| CHB | chr12 | TBC1D3 | 65659484 | 0   |
| CHB | chr12 | TBC1D3 | 65709484 | 0   |
| CHB | chr12 | TBC1D3 | 65759484 | 0   |
| CHB | chr12 | TBC1D3 | 65809484 | 0   |
| CHB | chr12 | TBC1D3 | 65859484 | 0   |
| CHB | chr12 | TBC1D3 | 65909484 | 0   |
| CHB | chr12 | TBC1D3 | 65959484 | 0   |

## 3\_Introgression\_data

|     |       |        |          |    |
|-----|-------|--------|----------|----|
| CHB | chr12 | TBC1D3 | 66009484 | 0  |
| CHB | chr12 | TBC1D3 | 66059484 | 0  |
| CHB | chr12 | TBC1D3 | 66109484 | 0  |
| CHB | chr12 | TBC1D3 | 66159484 | 0  |
| CHB | chr12 | TBC1D3 | 66209484 | 0  |
| CHB | chr12 | TBC1D3 | 66259484 | 0  |
| CHB | chr12 | TBC1D3 | 66309484 | 0  |
| CHB | chr12 | TBC1D3 | 66359484 | 0  |
| CHB | chr12 | TBC1D3 | 66409484 | 0  |
| CHB | chr12 | TBC1D3 | 66459484 | 0  |
| CHB | chr12 | TBC1D3 | 66509484 | 0  |
| CHB | chr12 | TBC1D3 | 66559484 | 0  |
| CHB | chr12 | TBC1D3 | 66609484 | 0  |
| CHB | chr12 | TBC1D3 | 66659484 | 0  |
| CHB | chr12 | TBC1D3 | 66709484 | 0  |
| CHB | chr12 | TBC1D3 | 66759484 | 0  |
| CHB | chr12 | TBC1D3 | 66809484 | 0  |
| CHB | chr12 | TBC1D3 | 66859484 | 0  |
| CHB | chr12 | TBC1D3 | 66909484 | 0  |
| CHB | chr12 | TBC1D3 | 66959484 | 0  |
| CHB | chr12 | TBC1D3 | 67009484 | 0  |
| CHB | chr12 | TBC1D3 | 67059484 | 0  |
| CHB | chr12 | TBC1D3 | 67109484 | 0  |
| CHB | chr12 | TBC1D3 | 67159484 | 0  |
| CHB | chr12 | TBC1D3 | 67209484 | 0  |
| CHB | chr12 | TBC1D3 | 67259484 | 0  |
| CHB | chr12 | TBC1D3 | 67309484 | 0  |
| CHB | chr12 | TBC1D3 | 67359484 | 0  |
| CHB | chr12 | TBC1D3 | 67409484 | 0  |
| CHB | chr12 | TBC1D3 | 67459484 | 0  |
| CHB | chr12 | TBC1D3 | 67509484 | 0  |
| CHB | chr12 | TBC1D3 | 67559484 | 0  |
| CHB | chr12 | TBC1D3 | 67609484 | 11 |
| CHB | chr12 | TBC1D3 | 67659484 | 19 |
| CHB | chr12 | TBC1D3 | 67709484 | 18 |
| CHB | chr12 | TBC1D3 | 67759484 | 21 |
| CHB | chr12 | TBC1D3 | 67809484 | 38 |
| CHB | chr12 | TBC1D3 | 67859484 | 27 |
| CHB | chr12 | TBC1D3 | 67909484 | 0  |
| CHB | chr12 | TBC1D3 | 67959484 | 0  |
| CHB | chr12 | TBC1D3 | 68009484 | 0  |
| CHB | chr12 | TBC1D3 | 68059484 | 0  |
| CHB | chr12 | TBC1D3 | 68109484 | 0  |
| CHB | chr12 | TBC1D3 | 68159484 | 0  |
| CHB | chr12 | TBC1D3 | 68209484 | 0  |
| CHB | chr12 | TBC1D3 | 68259484 | 0  |
| CHB | chr12 | TBC1D3 | 68309484 | 0  |
| CHB | chr12 | TBC1D3 | 68359484 | 0  |
| CHB | chr12 | TBC1D3 | 68409484 | 0  |

## 3\_Introgression\_data

|     |       |        |          |   |
|-----|-------|--------|----------|---|
| CHB | chr12 | TBC1D3 | 68459484 | 0 |
| CHB | chr12 | TBC1D3 | 68509484 | 0 |
| CHB | chr12 | TBC1D3 | 68559484 | 0 |
| CHB | chr12 | TBC1D3 | 68609484 | 0 |
| CHB | chr12 | TBC1D3 | 68659484 | 0 |
| CHB | chr12 | TBC1D3 | 68709484 | 0 |
| CHB | chr12 | TBC1D3 | 68759484 | 0 |
| CHB | chr12 | TBC1D3 | 68809484 | 0 |
| CHB | chr12 | TBC1D3 | 68859484 | 0 |
| CHB | chr12 | TBC1D3 | 68909484 | 0 |
| CHB | chr12 | TBC1D3 | 68959484 | 0 |
| CHB | chr12 | TBC1D3 | 69009484 | 0 |
| CHB | chr12 | TBC1D3 | 69059484 | 0 |
| CHB | chr12 | TBC1D3 | 69109484 | 0 |
| CHB | chr12 | TBC1D3 | 69159484 | 0 |
| CHB | chr12 | TBC1D3 | 69209484 | 0 |
| CHB | chr12 | TBC1D3 | 69259484 | 0 |
| CHB | chr12 | TBC1D3 | 69309484 | 0 |
| CHB | chr12 | TBC1D3 | 69359484 | 0 |
| CHB | chr12 | TBC1D3 | 69409484 | 0 |
| CHB | chr12 | TBC1D3 | 69459484 | 0 |
| CHB | chr12 | TBC1D3 | 69509484 | 0 |
| CHB | chr12 | TBC1D3 | 69559484 | 0 |
| CHB | chr12 | TBC1D3 | 69609484 | 0 |
| CHB | chr12 | TBC1D3 | 69659484 | 0 |
| CHB | chr12 | TBC1D3 | 69709484 | 0 |
| CHB | chr12 | TBC1D3 | 69759484 | 0 |
| CHB | chr12 | TBC1D3 | 69809484 | 0 |
| CHB | chr17 | TBC1D3 | 31215683 | 0 |
| CHB | chr17 | TBC1D3 | 31265683 | 0 |
| CHB | chr17 | TBC1D3 | 31315683 | 0 |
| CHB | chr17 | TBC1D3 | 31365683 | 0 |
| CHB | chr17 | TBC1D3 | 31415683 | 0 |
| CHB | chr17 | TBC1D3 | 31465683 | 0 |
| CHB | chr17 | TBC1D3 | 31515683 | 0 |
| CHB | chr17 | TBC1D3 | 31565683 | 0 |
| CHB | chr17 | TBC1D3 | 31615683 | 0 |
| CHB | chr17 | TBC1D3 | 31665683 | 0 |
| CHB | chr17 | TBC1D3 | 31715683 | 0 |
| CHB | chr17 | TBC1D3 | 31765683 | 0 |
| CHB | chr17 | TBC1D3 | 31815683 | 0 |
| CHB | chr17 | TBC1D3 | 31865683 | 0 |
| CHB | chr17 | TBC1D3 | 31915683 | 0 |
| CHB | chr17 | TBC1D3 | 31965683 | 0 |
| CHB | chr17 | TBC1D3 | 32015683 | 0 |
| CHB | chr17 | TBC1D3 | 32065683 | 0 |
| CHB | chr17 | TBC1D3 | 32115683 | 0 |
| CHB | chr17 | TBC1D3 | 32165683 | 0 |
| CHB | chr17 | TBC1D3 | 32215683 | 0 |

## 3\_Introgression\_data

|     |       |        |          |    |
|-----|-------|--------|----------|----|
| CHB | chr17 | TBC1D3 | 32265683 | 0  |
| CHB | chr17 | TBC1D3 | 32315683 | 0  |
| CHB | chr17 | TBC1D3 | 32365683 | 0  |
| CHB | chr17 | TBC1D3 | 32415683 | 0  |
| CHB | chr17 | TBC1D3 | 32465683 | 0  |
| CHB | chr17 | TBC1D3 | 32515683 | 0  |
| CHB | chr17 | TBC1D3 | 32565683 | 0  |
| CHB | chr17 | TBC1D3 | 32615683 | 0  |
| CHB | chr17 | TBC1D3 | 32665683 | 0  |
| CHB | chr17 | TBC1D3 | 32715683 | 0  |
| CHB | chr17 | TBC1D3 | 32765683 | 0  |
| CHB | chr17 | TBC1D3 | 32815683 | 0  |
| CHB | chr17 | TBC1D3 | 32865683 | 0  |
| CHB | chr17 | TBC1D3 | 32915683 | 0  |
| CHB | chr17 | TBC1D3 | 32965683 | 0  |
| CHB | chr17 | TBC1D3 | 33015683 | 0  |
| CHB | chr17 | TBC1D3 | 33065683 | 0  |
| CHB | chr17 | TBC1D3 | 33115683 | 0  |
| CHB | chr17 | TBC1D3 | 33165683 | 0  |
| CHB | chr17 | TBC1D3 | 33215683 | 0  |
| CHB | chr17 | TBC1D3 | 33265683 | 0  |
| CHB | chr17 | TBC1D3 | 33315683 | 0  |
| CHB | chr17 | TBC1D3 | 33365683 | 0  |
| CHB | chr17 | TBC1D3 | 33415683 | 0  |
| CHB | chr17 | TBC1D3 | 33465683 | 0  |
| CHB | chr17 | TBC1D3 | 33515683 | 0  |
| CHB | chr17 | TBC1D3 | 33565683 | 0  |
| CHB | chr17 | TBC1D3 | 33615683 | 0  |
| CHB | chr17 | TBC1D3 | 33665683 | 0  |
| CHB | chr17 | TBC1D3 | 33715683 | 2  |
| CHB | chr17 | TBC1D3 | 33765683 | 16 |
| CHB | chr17 | TBC1D3 | 33815683 | 28 |
| CHB | chr17 | TBC1D3 | 33865683 | 30 |
| CHB | chr17 | TBC1D3 | 33915683 | 25 |
| CHB | chr17 | TBC1D3 | 33965683 | 19 |
| CHB | chr17 | TBC1D3 | 34015683 | 19 |
| CHB | chr17 | TBC1D3 | 34065683 | 61 |
| CHB | chr17 | TBC1D3 | 34115683 | 77 |
| CHB | chr17 | TBC1D3 | 34165683 | 47 |
| CHB | chr17 | TBC1D3 | 34215683 | 36 |
| CHB | chr17 | TBC1D3 | 34265683 | 29 |
| CHB | chr17 | TBC1D3 | 34315683 | 15 |
| CHB | chr17 | TBC1D3 | 34365683 | 0  |
| CHB | chr17 | TBC1D3 | 34415683 | 0  |
| CHB | chr17 | TBC1D3 | 34465683 | 0  |
| CHB | chr17 | TBC1D3 | 34515683 | 0  |
| CHB | chr17 | TBC1D3 | 34565683 | 0  |
| CHB | chr17 | TBC1D3 | 34615683 | 0  |
| CHB | chr17 | TBC1D3 | 34665683 | 0  |

3\_Introgression\_data

|     |       |        |          |    |
|-----|-------|--------|----------|----|
| CHB | chr17 | TBC1D3 | 34715683 | 0  |
| CHB | chr17 | TBC1D3 | 34765683 | 0  |
| CHB | chr17 | TBC1D3 | 34815683 | 0  |
| CHB | chr17 | TBC1D3 | 34865683 | 0  |
| CHB | chr17 | TBC1D3 | 34915683 | 0  |
| CHB | chr17 | TBC1D3 | 34965683 | 0  |
| CHB | chr17 | TBC1D3 | 35015683 | 0  |
| CHB | chr17 | TBC1D3 | 35065683 | 0  |
| CHB | chr17 | TBC1D3 | 35115683 | 0  |
| CHB | chr17 | TBC1D3 | 35165683 | 0  |
| CHB | chr17 | TBC1D3 | 35215683 | 0  |
| CHB | chr17 | TBC1D3 | 35265683 | 0  |
| CHB | chr17 | TBC1D3 | 35315683 | 0  |
| CHB | chr17 | TBC1D3 | 35365683 | 0  |
| CHB | chr17 | TBC1D3 | 35415683 | 0  |
| CHB | chr17 | TBC1D3 | 35465683 | 0  |
| CHB | chr17 | TBC1D3 | 35515683 | 0  |
| CHB | chr17 | TBC1D3 | 35565683 | 0  |
| CHB | chr17 | TBC1D3 | 35615683 | 0  |
| CHB | chr17 | TBC1D3 | 35665683 | 0  |
| CHB | chr17 | TBC1D3 | 35715683 | 0  |
| CHB | chr17 | TBC1D3 | 35765683 | 0  |
| CHB | chr17 | TBC1D3 | 35815683 | 0  |
| CHB | chr17 | TBC1D3 | 35865683 | 0  |
| CHB | chr17 | TBC1D3 | 35915683 | 0  |
| CHB | chr17 | TBC1D3 | 35965683 | 0  |
| CHB | chr17 | TBC1D3 | 36015683 | 0  |
| CHB | chr17 | TBC1D3 | 36065683 | 0  |
| CHB | chr17 | TBC1D3 | 36115683 | 0  |
| CHB | chr17 | TBC1D3 | 36165683 | 0  |
| CHB | chr17 | TBC1D3 | 36215683 | 0  |
| CHB | chr17 | TBC1D3 | 36265683 | 0  |
| CHB | chr17 | TBC1D3 | 36315683 | 0  |
| CHB | chr17 | TBC1D3 | 36365683 | 0  |
| CHB | chr17 | TBC1D3 | 36415683 | 0  |
| CHB | chr17 | TBC1D3 | 36465683 | 0  |
| CHB | chr17 | TBC1D3 | 36515683 | 0  |
| CHB | chr17 | TBC1D3 | 36565683 | 0  |
| CHB | chr17 | TBC1D3 | 36615683 | 0  |
| CHB | chr17 | TBC1D3 | 36665683 | 0  |
| CHB | chr17 | TBC1D3 | 36715683 | 0  |
| CHB | chr17 | TBC1D3 | 36765683 | 0  |
| CHB | chr17 | TBC1D3 | 36815683 | 0  |
| CHB | chr17 | TBC1D3 | 36865683 | 0  |
| CHB | chr17 | TBC1D3 | 36915683 | 0  |
| CHB | chr17 | TBC1D3 | 36965683 | 0  |
| CHB | chr17 | TBC1D3 | 37015683 | 0  |
| CHB | chr17 | TBC1D3 | 37065683 | 23 |
| CHB | chr17 | TBC1D3 | 37115683 | 43 |

## 3\_Introgression\_data

|     |       |        |          |    |
|-----|-------|--------|----------|----|
| CHB | chr17 | TBC1D3 | 37165683 | 46 |
| CHB | chr17 | TBC1D3 | 37215683 | 59 |
| CHB | chr17 | TBC1D3 | 37265683 | 61 |
| CHB | chr17 | TBC1D3 | 37315683 | 28 |
| CHB | chr17 | TBC1D3 | 37365683 | 0  |
| CHB | chr17 | TBC1D3 | 37415683 | 0  |
| CHB | chr17 | TBC1D3 | 37465683 | 0  |
| CHB | chr17 | TBC1D3 | 37515683 | 0  |
| CHB | chr17 | TBC1D3 | 37565683 | 0  |
| CHB | chr17 | TBC1D3 | 37615683 | 0  |
| CHB | chr17 | TBC1D3 | 37665683 | 0  |
| CHB | chr17 | TBC1D3 | 37715683 | 0  |
| CHB | chr17 | TBC1D3 | 37765683 | 0  |
| CHB | chr17 | TBC1D3 | 37815683 | 0  |
| CHB | chr17 | TBC1D3 | 37865683 | 0  |
| CHB | chr17 | TBC1D3 | 37915683 | 0  |
| CHB | chr17 | TBC1D3 | 37965683 | 0  |
| CHB | chr17 | TBC1D3 | 38015683 | 0  |
| CHB | chr17 | TBC1D3 | 38065683 | 0  |
| CHB | chr17 | TBC1D3 | 38115683 | 0  |
| CHB | chr17 | TBC1D3 | 38165683 | 0  |
| CHB | chr17 | TBC1D3 | 38215683 | 0  |
| CHB | chr17 | TBC1D3 | 38265683 | 0  |
| CHB | chr17 | TBC1D3 | 38315683 | 0  |
| CHB | chr17 | TBC1D3 | 38365683 | 0  |
| CHB | chr17 | TBC1D3 | 38415683 | 0  |
| CHB | chr17 | TBC1D3 | 38465683 | 0  |
| CHB | chr17 | TBC1D3 | 38515683 | 0  |
| CHB | chr17 | TBC1D3 | 38565683 | 0  |
| CHB | chr17 | TBC1D3 | 38615683 | 0  |
| CHB | chr17 | TBC1D3 | 38665683 | 0  |
| CHB | chr17 | TBC1D3 | 38715683 | 0  |
| CHB | chr17 | TBC1D3 | 38765683 | 0  |
| CHB | chr17 | TBC1D3 | 38815683 | 0  |
| CHB | chr17 | TBC1D3 | 38865683 | 0  |
| CHB | chr17 | TBC1D3 | 38915683 | 0  |
| CHB | chr17 | TBC1D3 | 38965683 | 0  |
| CHB | chr17 | TBC1D3 | 39015683 | 0  |
| CHB | chr17 | TBC1D3 | 39065683 | 0  |
| CHB | chr17 | TBC1D3 | 39115683 | 0  |
| CHB | chr17 | TBC1D3 | 39165683 | 0  |
| CHB | chr17 | TBC1D3 | 39215683 | 0  |
| CHB | chr17 | TBC1D3 | 39265683 | 0  |
| CHB | chr17 | TBC1D3 | 39315683 | 0  |
| CHB | chr17 | TBC1D3 | 39365683 | 0  |
| CHB | chr17 | TBC1D3 | 39415683 | 0  |
| CHB | chr17 | TBC1D3 | 39465683 | 0  |
| CHB | chr17 | TBC1D3 | 39515683 | 0  |
| CHB | chr17 | TBC1D3 | 39565683 | 0  |

## 3\_Introgression\_data

|     |       |         |          |   |
|-----|-------|---------|----------|---|
| CHB | chr17 | TBC1D3  | 39615683 | 0 |
| CHB | chr17 | TBC1D3  | 39665683 | 0 |
| CHB | chr17 | TBC1D3  | 39715683 | 0 |
| CHB | chr17 | TBC1D3  | 39765683 | 0 |
| CHB | chr17 | TBC1D3  | 39815683 | 0 |
| CHB | chr17 | TBC1D3  | 39865683 | 0 |
| CHB | chr17 | TBC1D3  | 39915683 | 0 |
| CHB | chr17 | TBC1D3  | 39965683 | 0 |
| CHB | chr17 | TBC1D3  | 40015683 | 0 |
| CHB | chr17 | TBC1D3  | 40065683 | 0 |
| CHB | chr17 | TBC1D3  | 40115683 | 0 |
| CHB | chr17 | TBC1D3  | 40165683 | 0 |
| CHB | chr17 | TBC1D3  | 40215683 | 0 |
| CHB | chr17 | TBC1D3  | 40265683 | 0 |
| CHB | chr17 | TBC1D3  | 40315683 | 0 |
| CHB | chr17 | TBC1D3  | 40365683 | 0 |
| CHB | chr17 | TBC1D3  | 40415683 | 0 |
| CHB | chr17 | TBC1D3  | 40465683 | 0 |
| CHB | chr17 | TBC1D3  | 40515683 | 0 |
| CHB | chr17 | TBC1D3  | 40565683 | 0 |
| CHB | chr17 | TBC1D3  | 40615683 | 0 |
| CHB | chr17 | TBC1D3  | 40665683 | 0 |
| CHB | chr17 | TBC1D3  | 40715683 | 0 |
| CHB | chr17 | TBC1D3  | 40765683 | 0 |
| CHB | chr17 | TBC1D3  | 40815683 | 0 |
| CHB | chr17 | TBC1D3  | 40865683 | 0 |
| CHB | chr17 | TBC1D3  | 40915683 | 0 |
| CHB | chr17 | TBC1D3  | 40965683 | 0 |
| CHB | chr17 | TBC1D3  | 41015683 | 0 |
| CHB | chr17 | TBC1D3  | 41065683 | 0 |
| CHB | chr17 | TBC1D3  | 41115683 | 0 |
| CHB | chr16 | TP53TG3 | 27301603 | 0 |
| CHB | chr16 | TP53TG3 | 27351603 | 0 |
| CHB | chr16 | TP53TG3 | 27401603 | 0 |
| CHB | chr16 | TP53TG3 | 27451603 | 0 |
| CHB | chr16 | TP53TG3 | 27501603 | 0 |
| CHB | chr16 | TP53TG3 | 27551603 | 0 |
| CHB | chr16 | TP53TG3 | 27601603 | 0 |
| CHB | chr16 | TP53TG3 | 27651603 | 0 |
| CHB | chr16 | TP53TG3 | 27701603 | 0 |
| CHB | chr16 | TP53TG3 | 27751603 | 0 |
| CHB | chr16 | TP53TG3 | 27801603 | 0 |
| CHB | chr16 | TP53TG3 | 27851603 | 0 |
| CHB | chr16 | TP53TG3 | 27901603 | 0 |
| CHB | chr16 | TP53TG3 | 27951603 | 0 |
| CHB | chr16 | TP53TG3 | 28001603 | 0 |
| CHB | chr16 | TP53TG3 | 28051603 | 0 |
| CHB | chr16 | TP53TG3 | 28101603 | 0 |
| CHB | chr16 | TP53TG3 | 28151603 | 0 |

## 3\_Introgression\_data

|     |       |         |          |   |
|-----|-------|---------|----------|---|
| CHB | chr16 | TP53TG3 | 28201603 | 0 |
| CHB | chr16 | TP53TG3 | 28251603 | 0 |
| CHB | chr16 | TP53TG3 | 28301603 | 0 |
| CHB | chr16 | TP53TG3 | 28351603 | 0 |
| CHB | chr16 | TP53TG3 | 28401603 | 0 |
| CHB | chr16 | TP53TG3 | 28451603 | 0 |
| CHB | chr16 | TP53TG3 | 28501603 | 0 |
| CHB | chr16 | TP53TG3 | 28551603 | 0 |
| CHB | chr16 | TP53TG3 | 28601603 | 0 |
| CHB | chr16 | TP53TG3 | 28651603 | 0 |
| CHB | chr16 | TP53TG3 | 28701603 | 0 |
| CHB | chr16 | TP53TG3 | 28751603 | 0 |
| CHB | chr16 | TP53TG3 | 28801603 | 0 |
| CHB | chr16 | TP53TG3 | 28851603 | 0 |
| CHB | chr16 | TP53TG3 | 28901603 | 0 |
| CHB | chr16 | TP53TG3 | 28951603 | 0 |
| CHB | chr16 | TP53TG3 | 29001603 | 0 |
| CHB | chr16 | TP53TG3 | 29051603 | 0 |
| CHB | chr16 | TP53TG3 | 29101603 | 0 |
| CHB | chr16 | TP53TG3 | 29151603 | 0 |
| CHB | chr16 | TP53TG3 | 29201603 | 0 |
| CHB | chr16 | TP53TG3 | 29251603 | 0 |
| CHB | chr16 | TP53TG3 | 29301603 | 0 |
| CHB | chr16 | TP53TG3 | 29351603 | 0 |
| CHB | chr16 | TP53TG3 | 29401603 | 0 |
| CHB | chr16 | TP53TG3 | 29451603 | 0 |
| CHB | chr16 | TP53TG3 | 29501603 | 0 |
| CHB | chr16 | TP53TG3 | 29551603 | 0 |
| CHB | chr16 | TP53TG3 | 29601603 | 0 |
| CHB | chr16 | TP53TG3 | 29651603 | 0 |
| CHB | chr16 | TP53TG3 | 29701603 | 0 |
| CHB | chr16 | TP53TG3 | 29751603 | 0 |
| CHB | chr16 | TP53TG3 | 29801603 | 0 |
| CHB | chr16 | TP53TG3 | 29851603 | 0 |
| CHB | chr16 | TP53TG3 | 29901603 | 0 |
| CHB | chr16 | TP53TG3 | 29951603 | 0 |
| CHB | chr16 | TP53TG3 | 30001603 | 0 |
| CHB | chr16 | TP53TG3 | 30051603 | 0 |
| CHB | chr16 | TP53TG3 | 30101603 | 0 |
| CHB | chr16 | TP53TG3 | 30151603 | 0 |
| CHB | chr16 | TP53TG3 | 30201603 | 0 |
| CHB | chr16 | TP53TG3 | 30251603 | 0 |
| CHB | chr16 | TP53TG3 | 30301603 | 0 |
| CHB | chr16 | TP53TG3 | 30351603 | 0 |
| CHB | chr16 | TP53TG3 | 30401603 | 0 |
| CHB | chr16 | TP53TG3 | 30451603 | 0 |
| CHB | chr16 | TP53TG3 | 30501603 | 0 |
| CHB | chr16 | TP53TG3 | 30551603 | 0 |
| CHB | chr16 | TP53TG3 | 30601603 | 0 |



## 3\_Introgression\_data

|     |       |         |          |   |
|-----|-------|---------|----------|---|
| CHB | chr16 | TP53TG3 | 30651603 | 0 |
| CHB | chr16 | TP53TG3 | 30701603 | 0 |
| CHB | chr16 | TP53TG3 | 30751603 | 0 |
| CHB | chr16 | TP53TG3 | 30801603 | 0 |
| CHB | chr16 | TP53TG3 | 30851603 | 0 |
| CHB | chr16 | TP53TG3 | 30901603 | 0 |
| CHB | chr16 | TP53TG3 | 30951603 | 0 |
| CHB | chr16 | TP53TG3 | 31001603 | 0 |
| CHB | chr16 | TP53TG3 | 31051603 | 0 |
| CHB | chr16 | TP53TG3 | 31101603 | 0 |
| CHB | chr16 | TP53TG3 | 31151603 | 0 |
| CHB | chr16 | TP53TG3 | 31201603 | 0 |
| CHB | chr16 | TP53TG3 | 31251603 | 0 |
| CHB | chr16 | TP53TG3 | 31301603 | 0 |
| CHB | chr16 | TP53TG3 | 31351603 | 0 |
| CHB | chr16 | TP53TG3 | 31401603 | 0 |
| CHB | chr16 | TP53TG3 | 31451603 | 0 |
| CHB | chr16 | TP53TG3 | 31501603 | 0 |
| CHB | chr16 | TP53TG3 | 31551603 | 0 |
| CHB | chr16 | TP53TG3 | 31601603 | 0 |
| CHB | chr16 | TP53TG3 | 31651603 | 0 |
| CHB | chr16 | TP53TG3 | 31701603 | 0 |
| CHB | chr16 | TP53TG3 | 31751603 | 0 |
| CHB | chr16 | TP53TG3 | 31801603 | 0 |
| CHB | chr16 | TP53TG3 | 31851603 | 0 |
| CHB | chr16 | TP53TG3 | 31901603 | 0 |
| CHB | chr16 | TP53TG3 | 31951603 | 0 |
| CHB | chr16 | TP53TG3 | 32001603 | 0 |
| CHB | chr16 | TP53TG3 | 32051603 | 0 |
| CHB | chr16 | TP53TG3 | 32101603 | 0 |
| CHB | chr16 | TP53TG3 | 32151603 | 0 |
| CHB | chr16 | TP53TG3 | 32201603 | 0 |
| CHB | chr16 | TP53TG3 | 32251603 | 0 |
| CHB | chr16 | TP53TG3 | 32301603 | 0 |
| CHB | chr16 | TP53TG3 | 32351603 | 0 |
| CHB | chr16 | TP53TG3 | 32401603 | 0 |
| CHB | chr16 | TP53TG3 | 32451603 | 0 |
| CHB | chr16 | TP53TG3 | 32501603 | 0 |
| CHB | chr16 | TP53TG3 | 32551603 | 0 |
| CHB | chr16 | TP53TG3 | 32601603 | 0 |
| CHB | chr16 | TP53TG3 | 32651603 | 0 |
| CHB | chr16 | TP53TG3 | 32701603 | 0 |
| CHB | chr16 | TP53TG3 | 32751603 | 0 |
| CHB | chr16 | TP53TG3 | 32801603 | 0 |
| CHB | chr16 | TP53TG3 | 32851603 | 0 |
| CHB | chr16 | TP53TG3 | 32901603 | 0 |
| CHB | chr16 | TP53TG3 | 32951603 | 0 |
| CHB | chr16 | TP53TG3 | 33001603 | 0 |
| CHB | chr16 | TP53TG3 | 33051603 | 0 |

## 3\_Introgression\_data

|     |       |         |          |   |
|-----|-------|---------|----------|---|
| CHB | chr16 | TP53TG3 | 33101603 | 0 |
| CHB | chr16 | TP53TG3 | 33151603 | 0 |
| CHB | chr16 | TP53TG3 | 33201603 | 0 |
| CHB | chr16 | TP53TG3 | 33251603 | 0 |
| CHB | chr16 | TP53TG3 | 33301603 | 0 |
| CHB | chr16 | TP53TG3 | 33351603 | 0 |
| CHB | chr16 | TP53TG3 | 33401603 | 0 |
| CHB | chr16 | TP53TG3 | 33451603 | 0 |
| CHB | chr16 | TP53TG3 | 33501603 | 0 |
| CHB | chr16 | TP53TG3 | 33551603 | 0 |
| CHB | chr16 | TP53TG3 | 33601603 | 0 |
| CHB | chr16 | TP53TG3 | 33651603 | 0 |
| CHB | chr16 | TP53TG3 | 33701603 | 0 |
| CHB | chr16 | TP53TG3 | 33751603 | 0 |
| CHB | chr16 | TP53TG3 | 33801603 | 0 |
| CHB | chr16 | TP53TG3 | 33851603 | 0 |
| CHB | chr16 | TP53TG3 | 33901603 | 0 |
| CHB | chr16 | TP53TG3 | 33951603 | 0 |
| CHB | chr16 | TP53TG3 | 34001603 | 0 |
| CHB | chr16 | TP53TG3 | 34051603 | 0 |
| CHB | chr16 | TP53TG3 | 34101603 | 0 |
| CHB | chr16 | TP53TG3 | 34151603 | 0 |
| CHB | chr16 | TP53TG3 | 34201603 | 0 |
| CHB | chr16 | TP53TG3 | 34251603 | 0 |
| CHB | chr16 | TP53TG3 | 34301603 | 0 |
| CHB | chr16 | TP53TG3 | 34351603 | 0 |
| CHB | chr16 | TP53TG3 | 34401603 | 0 |
| CHB | chr16 | TP53TG3 | 34451603 | 0 |
| CHB | chr16 | TP53TG3 | 34501603 | 0 |
| CHB | chr16 | TP53TG3 | 34551603 | 0 |
| CHB | chr16 | TP53TG3 | 34601603 | 0 |
| CHB | chr16 | TP53TG3 | 34651603 | 0 |
| CHB | chr16 | TP53TG3 | 34701603 | 0 |
| CHB | chr16 | TP53TG3 | 34751603 | 0 |
| CHB | chr16 | TP53TG3 | 34801603 | 0 |
| CHB | chr16 | TP53TG3 | 34851603 | 0 |
| CHB | chr16 | TP53TG3 | 34901603 | 0 |
| CHB | chr16 | TP53TG3 | 34951603 | 0 |
| CHB | chr16 | TP53TG3 | 35001603 | 0 |
| CHB | chr16 | TP53TG3 | 35051603 | 0 |
| CHB | chr16 | TP53TG3 | 35101603 | 0 |
| CHB | chr16 | TP53TG3 | 35151603 | 0 |
| CHB | chr16 | TP53TG3 | 35201603 | 0 |
| CHB | chr16 | TP53TG3 | 35251603 | 0 |
| CHB | chr16 | TP53TG3 | 35301603 | 0 |
| CHB | chr16 | TP53TG3 | 35351603 | 0 |
| CHB | chr16 | TP53TG3 | 35401603 | 0 |
| CHB | chr16 | TP53TG3 | 35451603 | 0 |
| CHB | chr16 | TP53TG3 | 35501603 | 0 |

3\_Introgression\_data

|     |       |          |          |    |
|-----|-------|----------|----------|----|
| CHB | chr16 | TP53TG3  | 35551603 | 0  |
| CHB | chr16 | TP53TG3  | 35601603 | 0  |
| CHB | chr16 | TP53TG3  | 35651603 | 0  |
| CHB | chr16 | TP53TG3  | 35701603 | 0  |
| CHB | chr16 | TP53TG3  | 35751603 | 0  |
| CHB | chr16 | TP53TG3  | 35801603 | 0  |
| CHB | chr16 | TP53TG3  | 35851603 | 0  |
| CHB | chr16 | TP53TG3  | 35901603 | 0  |
| CHB | chr16 | TP53TG3  | 35951603 | 0  |
| CHB | chr16 | TP53TG3  | 36001603 | 0  |
| CHB | chr16 | TP53TG3  | 36051603 | 0  |
| CHB | chr16 | TP53TG3  | 36101603 | 0  |
| CHB | chr16 | TP53TG3  | 36151603 | 0  |
| CHB | chr16 | TP53TG3  | 36201603 | 0  |
| CHB | chr16 | TP53TG3  | 36251603 | 0  |
| CHB | chr16 | TP53TG3  | 36301603 | 0  |
| CHB | chr16 | TP53TG3  | 36351603 | 0  |
| CHB | chr16 | TP53TG3  | 36401603 | 0  |
| CHB | chr16 | TP53TG3  | 36451603 | 0  |
| CHB | chr16 | TP53TG3  | 36501603 | 0  |
| CHB | chr16 | TP53TG3  | 36551603 | 0  |
| CHB | chr16 | TP53TG3  | 36601603 | 0  |
| CHB | chr16 | TP53TG3  | 36651603 | 0  |
| CHB | chr16 | TP53TG3  | 36701603 | 0  |
| CHB | chr16 | TP53TG3  | 36751603 | 0  |
| CHB | chr16 | TP53TG3  | 36801603 | 0  |
| CHB | chr16 | TP53TG3  | 36851603 | 0  |
| CHB | chr16 | TP53TG3  | 36901603 | 0  |
| CHB | chr16 | TP53TG3  | 36951603 | 0  |
| CHB | chr16 | TP53TG3  | 37001603 | 0  |
| CHB | chr16 | TP53TG3  | 37051603 | 0  |
| CHB | chr16 | TP53TG3  | 37101603 | 0  |
| CHB | chr16 | TP53TG3  | 37151603 | 0  |
| CHB | chr16 | TP53TG3  | 37201603 | 0  |
| CHB | chr11 | TRIM49L1 | 84974064 | 0  |
| CHB | chr11 | TRIM49L1 | 85024064 | 0  |
| CHB | chr11 | TRIM49L1 | 85074064 | 0  |
| CHB | chr11 | TRIM49L1 | 85124064 | 0  |
| CHB | chr11 | TRIM49L1 | 85174064 | 0  |
| CHB | chr11 | TRIM49L1 | 85224064 | 0  |
| CHB | chr11 | TRIM49L1 | 85274064 | 0  |
| CHB | chr11 | TRIM49L1 | 85324064 | 0  |
| CHB | chr11 | TRIM49L1 | 85374064 | 0  |
| CHB | chr11 | TRIM49L1 | 85424064 | 0  |
| CHB | chr11 | TRIM49L1 | 85474064 | 0  |
| CHB | chr11 | TRIM49L1 | 85524064 | 14 |
| CHB | chr11 | TRIM49L1 | 85574064 | 29 |
| CHB | chr11 | TRIM49L1 | 85624064 | 36 |
| CHB | chr11 | TRIM49L1 | 85674064 | 36 |

## 3\_Introgression\_data

|     |       |          |          |    |
|-----|-------|----------|----------|----|
| CHB | chr11 | TRIM49L1 | 85724064 | 36 |
| CHB | chr11 | TRIM49L1 | 85774064 | 39 |
| CHB | chr11 | TRIM49L1 | 85824064 | 32 |
| CHB | chr11 | TRIM49L1 | 85874064 | 28 |
| CHB | chr11 | TRIM49L1 | 85924064 | 14 |
| CHB | chr11 | TRIM49L1 | 85974064 | 0  |
| CHB | chr11 | TRIM49L1 | 86024064 | 0  |
| CHB | chr11 | TRIM49L1 | 86074064 | 0  |
| CHB | chr11 | TRIM49L1 | 86124064 | 0  |
| CHB | chr11 | TRIM49L1 | 86174064 | 0  |
| CHB | chr11 | TRIM49L1 | 86224064 | 0  |
| CHB | chr11 | TRIM49L1 | 86274064 | 0  |
| CHB | chr11 | TRIM49L1 | 86324064 | 0  |
| CHB | chr11 | TRIM49L1 | 86374064 | 0  |
| CHB | chr11 | TRIM49L1 | 86424064 | 29 |
| CHB | chr11 | TRIM49L1 | 86474064 | 63 |
| CHB | chr11 | TRIM49L1 | 86524064 | 58 |
| CHB | chr11 | TRIM49L1 | 86574064 | 47 |
| CHB | chr11 | TRIM49L1 | 86624064 | 23 |
| CHB | chr11 | TRIM49L1 | 86674064 | 0  |
| CHB | chr11 | TRIM49L1 | 86724064 | 0  |
| CHB | chr11 | TRIM49L1 | 86774064 | 0  |
| CHB | chr11 | TRIM49L1 | 86824064 | 0  |
| CHB | chr11 | TRIM49L1 | 86874064 | 0  |
| CHB | chr11 | TRIM49L1 | 86924064 | 0  |
| CHB | chr11 | TRIM49L1 | 86974064 | 0  |
| CHB | chr11 | TRIM49L1 | 87024064 | 0  |
| CHB | chr11 | TRIM49L1 | 87074064 | 0  |
| CHB | chr11 | TRIM49L1 | 87124064 | 0  |
| CHB | chr11 | TRIM49L1 | 87174064 | 1  |
| CHB | chr11 | TRIM49L1 | 87224064 | 18 |
| CHB | chr11 | TRIM49L1 | 87274064 | 39 |
| CHB | chr11 | TRIM49L1 | 87324064 | 43 |
| CHB | chr11 | TRIM49L1 | 87374064 | 37 |
| CHB | chr11 | TRIM49L1 | 87424064 | 24 |
| CHB | chr11 | TRIM49L1 | 87474064 | 29 |
| CHB | chr11 | TRIM49L1 | 87524064 | 42 |
| CHB | chr11 | TRIM49L1 | 87574064 | 51 |
| CHB | chr11 | TRIM49L1 | 87624064 | 34 |
| CHB | chr11 | TRIM49L1 | 87674064 | 4  |
| CHB | chr11 | TRIM49L1 | 87724064 | 0  |
| CHB | chr11 | TRIM49L1 | 87774064 | 0  |
| CHB | chr11 | TRIM49L1 | 87824064 | 0  |
| CHB | chr11 | TRIM49L1 | 87874064 | 0  |
| CHB | chr11 | TRIM49L1 | 87924064 | 0  |
| CHB | chr11 | TRIM49L1 | 87974064 | 0  |
| CHB | chr11 | TRIM49L1 | 88024064 | 0  |
| CHB | chr11 | TRIM49L1 | 88074064 | 0  |
| CHB | chr11 | TRIM49L1 | 88124064 | 0  |

## 3\_Introgression\_data

|     |       |          |          |   |
|-----|-------|----------|----------|---|
| CHB | chr11 | TRIM49L1 | 88174064 | 0 |
| CHB | chr11 | TRIM49L1 | 88224064 | 0 |
| CHB | chr11 | TRIM49L1 | 88274064 | 0 |
| CHB | chr11 | TRIM49L1 | 88324064 | 0 |
| CHB | chr11 | TRIM49L1 | 88374064 | 0 |
| CHB | chr11 | TRIM49L1 | 88424064 | 0 |
| CHB | chr11 | TRIM49L1 | 88474064 | 0 |
| CHB | chr11 | TRIM49L1 | 88524064 | 0 |
| CHB | chr11 | TRIM49L1 | 88574064 | 0 |
| CHB | chr11 | TRIM49L1 | 88624064 | 0 |
| CHB | chr11 | TRIM49L1 | 88674064 | 0 |
| CHB | chr11 | TRIM49L1 | 88724064 | 0 |
| CHB | chr11 | TRIM49L1 | 88774064 | 0 |
| CHB | chr11 | TRIM49L1 | 88824064 | 0 |
| CHB | chr11 | TRIM49L1 | 88874064 | 0 |
| CHB | chr11 | TRIM49L1 | 88924064 | 0 |
| CHB | chr11 | TRIM49L1 | 88974064 | 0 |
| CHB | chr11 | TRIM49L1 | 89024064 | 0 |
| CHB | chr11 | TRIM49L1 | 89074064 | 0 |
| CHB | chr11 | TRIM49L1 | 89124064 | 0 |
| CHB | chr11 | TRIM49L1 | 89174064 | 0 |
| CHB | chr11 | TRIM49L1 | 89224064 | 0 |
| CHB | chr11 | TRIM49L1 | 89274064 | 0 |
| CHB | chr11 | TRIM49L1 | 89324064 | 0 |
| CHB | chr11 | TRIM49L1 | 89374064 | 0 |
| CHB | chr11 | TRIM49L1 | 89424064 | 0 |
| CHB | chr11 | TRIM49L1 | 89474064 | 0 |
| CHB | chr11 | TRIM49L1 | 89524064 | 0 |
| CHB | chr11 | TRIM49L1 | 89574064 | 0 |
| CHB | chr11 | TRIM49L1 | 89624064 | 0 |
| CHB | chr11 | TRIM49L1 | 89674064 | 0 |
| CHB | chr11 | TRIM49L1 | 89724064 | 0 |
| CHB | chr11 | TRIM49L1 | 89774064 | 0 |
| CHB | chr11 | TRIM49L1 | 89824064 | 0 |
| CHB | chr11 | TRIM49L1 | 89874064 | 0 |
| CHB | chr11 | TRIM49L1 | 89924064 | 0 |
| CHB | chr11 | TRIM49L1 | 89974064 | 0 |
| CHB | chr11 | TRIM49L1 | 90024064 | 0 |
| CHB | chr11 | TRIM49L1 | 90074064 | 0 |
| CHB | chr11 | TRIM49L1 | 90124064 | 0 |
| CHB | chr11 | TRIM49L1 | 90174064 | 0 |
| CHB | chr11 | TRIM49L1 | 90224064 | 0 |
| CHB | chr11 | TRIM49L1 | 90274064 | 0 |
| CHB | chr11 | TRIM49L1 | 90324064 | 0 |
| CHB | chr11 | TRIM49L1 | 90374064 | 0 |
| CHB | chr11 | TRIM49L1 | 90424064 | 0 |
| CHB | chr11 | TRIM49L1 | 90474064 | 0 |
| CHB | chr11 | TRIM49L1 | 90524064 | 0 |
| CHB | chr11 | TRIM49L1 | 90574064 | 0 |

## 3\_Introgression\_data

|     |       |          |          |    |
|-----|-------|----------|----------|----|
| CHB | chr11 | TRIM49L1 | 90624064 | 0  |
| CHB | chr11 | TRIM49L1 | 90674064 | 0  |
| CHB | chr11 | TRIM49L1 | 90724064 | 0  |
| CHB | chr11 | TRIM49L1 | 90774064 | 0  |
| CHB | chr11 | TRIM49L1 | 90824064 | 0  |
| CHB | chr11 | TRIM49L1 | 90874064 | 0  |
| CHB | chr11 | TRIM49L1 | 90924064 | 7  |
| CHB | chr11 | TRIM49L1 | 90974064 | 23 |
| CHB | chr11 | TRIM49L1 | 91024064 | 41 |
| CHB | chr11 | TRIM49L1 | 91074064 | 48 |
| CHB | chr11 | TRIM49L1 | 91124064 | 43 |
| CHB | chr11 | TRIM49L1 | 91174064 | 36 |
| CHB | chr11 | TRIM49L1 | 91224064 | 61 |
| CHB | chr11 | TRIM49L1 | 91274064 | 64 |
| CHB | chr11 | TRIM49L1 | 91324064 | 19 |
| CHB | chr11 | TRIM49L1 | 91374064 | 0  |
| CHB | chr11 | TRIM49L1 | 91424064 | 0  |
| CHB | chr11 | TRIM49L1 | 91474064 | 0  |
| CHB | chr11 | TRIM49L1 | 91524064 | 0  |
| CHB | chr11 | TRIM49L1 | 91574064 | 0  |
| CHB | chr11 | TRIM49L1 | 91624064 | 0  |
| CHB | chr11 | TRIM49L1 | 91674064 | 0  |
| CHB | chr11 | TRIM49L1 | 91724064 | 0  |
| CHB | chr11 | TRIM49L1 | 91774064 | 0  |
| CHB | chr11 | TRIM49L1 | 91824064 | 0  |
| CHB | chr11 | TRIM49L1 | 91874064 | 0  |
| CHB | chr11 | TRIM49L1 | 91924064 | 0  |
| CHB | chr11 | TRIM49L1 | 91974064 | 0  |
| CHB | chr11 | TRIM49L1 | 92024064 | 0  |
| CHB | chr11 | TRIM49L1 | 92074064 | 0  |
| CHB | chr11 | TRIM49L1 | 92124064 | 0  |
| CHB | chr11 | TRIM49L1 | 92174064 | 0  |
| CHB | chr11 | TRIM49L1 | 92224064 | 0  |
| CHB | chr11 | TRIM49L1 | 92274064 | 0  |
| CHB | chr11 | TRIM49L1 | 92324064 | 0  |
| CHB | chr11 | TRIM49L1 | 92374064 | 0  |
| CHB | chr11 | TRIM49L1 | 92424064 | 0  |
| CHB | chr11 | TRIM49L1 | 92474064 | 0  |
| CHB | chr11 | TRIM49L1 | 92524064 | 0  |
| CHB | chr11 | TRIM49L1 | 92574064 | 0  |
| CHB | chr11 | TRIM49L1 | 92624064 | 0  |
| CHB | chr11 | TRIM49L1 | 92674064 | 0  |
| CHB | chr11 | TRIM49L1 | 92724064 | 0  |
| CHB | chr11 | TRIM49L1 | 92774064 | 0  |
| CHB | chr11 | TRIM49L1 | 92824064 | 0  |
| CHB | chr11 | TRIM49L1 | 92874064 | 0  |
| CHB | chr11 | TRIM49L1 | 92924064 | 0  |
| CHB | chr11 | TRIM49L1 | 92974064 | 0  |
| CHB | chr11 | TRIM49L1 | 93024064 | 0  |

## 3\_Introgression\_data

|     |       |          |          |    |
|-----|-------|----------|----------|----|
| CHB | chr11 | TRIM49L1 | 93074064 | 0  |
| CHB | chr11 | TRIM49L1 | 93124064 | 0  |
| CHB | chr11 | TRIM49L1 | 93174064 | 7  |
| CHB | chr11 | TRIM49L1 | 93224064 | 31 |
| CHB | chr11 | TRIM49L1 | 93274064 | 44 |
| CHB | chr11 | TRIM49L1 | 93324064 | 48 |
| CHB | chr11 | TRIM49L1 | 93374064 | 48 |
| CHB | chr11 | TRIM49L1 | 93424064 | 20 |
| CHB | chr11 | TRIM49L1 | 93474064 | 0  |
| CHB | chr11 | TRIM49L1 | 93524064 | 0  |
| CHB | chr11 | TRIM49L1 | 93574064 | 0  |
| CHB | chr11 | TRIM49L1 | 93624064 | 0  |
| CHB | chr11 | TRIM49L1 | 93674064 | 0  |
| CHB | chr11 | TRIM49L1 | 93724064 | 0  |
| CHB | chr11 | TRIM49L1 | 93774064 | 0  |
| CHB | chr11 | TRIM49L1 | 93824064 | 0  |
| CHB | chr11 | TRIM49L1 | 93874064 | 0  |
| CHB | chr11 | TRIM49L1 | 93924064 | 0  |
| CHB | chr11 | TRIM49L1 | 93974064 | 0  |
| CHB | chr11 | TRIM49L1 | 94024064 | 0  |
| CHB | chr11 | TRIM49L1 | 94074064 | 28 |
| CHB | chr11 | TRIM49L1 | 94124064 | 43 |
| CHB | chr11 | TRIM49L1 | 94174064 | 31 |
| CHB | chr11 | TRIM49L1 | 94224064 | 38 |
| CHB | chr11 | TRIM49L1 | 94274064 | 34 |
| CHB | chr11 | TRIM49L1 | 94324064 | 34 |
| CHB | chr11 | TRIM49L1 | 94374064 | 23 |
| CHB | chr11 | TRIM49L1 | 94424064 | 1  |
| CHB | chr11 | TRIM49L1 | 94474064 | 0  |
| CHB | chr11 | TRIM49L1 | 94524064 | 0  |
| CHB | chr11 | TRIM49L1 | 94574064 | 0  |
| CHB | chr11 | TRIM49L1 | 94624064 | 0  |
| CHB | chr11 | TRIM49L1 | 94674064 | 0  |
| CHB | chr11 | TRIM49L1 | 94724064 | 0  |
| CHB | chr11 | TRIM49L1 | 94774064 | 0  |
| CHB | chr11 | TRIM49L1 | 94824064 | 0  |
| CHB | chr11 | TRIM49L1 | 94874064 | 0  |
